# Supplementary material
Source: publisher figshare collection journal article supplement (https://tandf.figshare.com/articles/dataset/_/10732607)
Supplement: Supplementary file 1 [file 2]

Archive with 11 entries (11 files):
- fjds_a_1690134_sm1441.pdf
- fjds_a_1690134_sm1436.pdf
- fjds_a_1690134_sm1399.pdf
- fjds_a_1690134_sm1381.pdf
- fjds_a_1690134_sm1346.pdf
- fjds_a_1690134_sm1295.pdf
- fjds_a_1690134_sm1285.pdf
- fjds_a_1690134_sm1276.pdf
- fjds_a_1690134_sm1270.pdf
- fjds_a_1690134_sm1263.pdf
- fjds_a_1690134_sm1252.pdf
