# Supplementary material
Source: publisher figshare collection journal article supplement (https://tandf.figshare.com/articles/dataset/_/10732607)
Supplement: Supplementary file 1 [file 2 › fjds_a_1690134_sm1252.pdf]

Documento del  
Banco Mundial

EXCLUSIVAMENTE PARA USO OFICIAL

Informe No. 54311-CO

DOCUMENTO DE EVALUACIÓN INICIAL DEL PROYECTO

SOBRE UN

PRÉSTAMO PROPUESTO

POR LA CANTIDAD DE US\$250 MILLONES

POR OTORGARSE A LA

CORPORACIÓN AUTÓNOMA REGIONAL DE CUNDINAMARCA

CON GARANTÍA DE

LA REPÚBLICA DE COLOMBIA

PARA UN

PROYECTO DE ADECUACIÓN HIDRÁULICA Y  
RECUPERACIÓN AMBIENTAL DEL RÍO BOGOTÁ

11 de noviembre de 2010

Departamento de Desarrollo Sostenible  
Unidad de Gestión Nacional  
Oficina Regional de América Latina y el Caribe

Este documento se pone a disposición del público antes de ser sometido a la consideración del Directorio Ejecutivo. Ello no entraña presunción de resultado alguno. Este documento podrá ser modificado luego de que el Directorio lo analice, y el documento actualizado se pondrá a disposición del público de conformidad con la política del Banco sobre acceso a la información.

## **EQUIVALENTES DE MONEDAS**

Tipo de cambio vigente al 31 de mayo de 2010

Unidad monetaria = Peso colombiano (CO\$)  
CO\$1975 = US\$1

EJERCICIO FISCAL  
1 de enero - 31 de diciembre

## **SIGLAS Y ABREVIATURAS**

|                    |                                                                                                            |
|--------------------|------------------------------------------------------------------------------------------------------------|
| AIF:               | Asociación Internacional de Fomento                                                                        |
| AOD:               | Asistencia Oficial para el Desarrollo                                                                      |
| APL:               | Préstamo Adaptable para Programas                                                                          |
| BID:               | Banco Interamericano de Desarrollo                                                                         |
| BIRF:              | Banco Internacional de Reconstrucción y Fomento                                                            |
| CAR:               | Corporación Autónoma Regional de Cundinamarca                                                              |
| CAT DDO:           | Opción de Giro Diferido ante el Riesgo de Catástrofe                                                       |
| CGR:               | Contraloría General de la República de Colombia                                                            |
| CIP:               | Centro de Información Pública                                                                              |
| CONPES:            | Consejo Nacional de Política Económica y Social                                                            |
| COT:               | Construcción-Operación-Transferencia                                                                       |
| CRA:               | Comisión de Regulación de Agua Potable y Saneamiento Básico                                                |
| DBO <sub>5</sub> : | Demanda Bioquímica de Oxígeno a los Cinco Días                                                             |
| DNP:               | Departamento Nacional de Planeación                                                                        |
| DPAE:              | Dirección de Prevención y Atención de Emergencias                                                          |
| EA:                | Evaluación Ambiental                                                                                       |
| EAAB:              | Empresa de Acueducto y Alcantarillado de Bogotá                                                            |
| EAP:               | Estrategia de Alianza con el País                                                                          |
| EBIT:              | Utilidades antes de Intereses e Impuestos                                                                  |
| EBITDA:            | Utilidades antes de Intereses, Impuestos, Depreciación y Amortización                                      |
| EBTDA:             | Utilidades antes de Impuestos, Depreciación y Amortización                                                 |
| Emgesa:            | Empresa de Energía de Bogotá S.A.                                                                          |
| FIAB:              | Fondo para las Inversiones Ambientales en el Perímetro Urbano de Bogotá                                    |
| FMAM:              | Fondo para el Medio Ambiente Mundial                                                                       |
| IADM:              | Iniciativa para el Alivio de la Deuda Multilateral                                                         |
| IFC:               | Corporación Financiera Internacional                                                                       |
| IFP:               | Informes Financieros Provisionales                                                                         |
| IGAC:              | Instituto Geográfico Agustín Codazzi                                                                       |
| INB:               | Inversión Nacional Bruta                                                                                   |
| LCSSEN:            | Unidad de Medio Ambiente de la Región de América Latina y el Caribe                                        |
| LCSSD:             | Departamento de Desarrollo Sostenible de la Región de América Latina y el Caribe                           |
| LCSUW:             | Unidad de Sector Urbano, Agua y Gestión del Riesgo de Desastres de la Región de América Latina y el Caribe |
| LPI:               | Licitación Pública Internacional                                                                           |
| LPN:               | Licitación Pública Nacional                                                                                |

|        |                                                                      |
|--------|----------------------------------------------------------------------|
| MAVDT: | Ministerio de Ambiente, Vivienda y Desarrollo Territorial            |
| MHCP:  | Ministerio de Hacienda y Crédito Público                             |
| MIGA:  | Organismo Multilateral de Garantía de Inversiones                    |
| OCI:   | Oficina de Control Interno                                           |
| ONG:   | Organización No Gubernamental                                        |
| PAR:   | Plan de Acción para el Reasentamiento                                |
| PGA:   | Plan de Gestión Ambiental                                            |
| PIB:   | Producto Interno Bruto                                               |
| PMAR:  | Plan de Manejo de las Aguas Residuales                               |
| POMCA: | Plan de Ordenación y Manejo de la Cuenca Hidrográfica del Río Bogotá |
| POT:   | Plan de Ordenamiento Territorial                                     |
| PPME:  | Países Pobres Muy Endeudados                                         |
| PSMV:  | Plan de Saneamiento y Manejo de Vertimientos                         |
| PTAR:  | Planta de Tratamiento de Aguas Residuales                            |
| SBC:   | Selección Basada en la Calidad                                       |
| SBCyC: | Selección Basada en la Calidad y el Costo                            |
| SDA:   | Secretaría Distrital de Ambiente                                     |
| SDAS:  | Subdirección de Desarrollo Ambiental Sostenible                      |
| SDV:   | Departamento de Desarrollo Social                                    |
| SEPA:  | Sistema de Ejecución de Planes de Adquisiciones                      |
| SSPD:  | Superintendencia de Servicios Públicos Domiciliarios                 |
| SST:   | Sólidos en Suspensión Totales                                        |
| TRI:   | Tasa de Rentabilidad Interna                                         |
| UEP:   | Unidad Ejecutora del Proyecto                                        |
| VNA:   | Valor Neto Actualizado                                               |

|                                                  |                                 |
|--------------------------------------------------|---------------------------------|
| Vice-Presidenta:                                 | Pamela Cox                      |
| Directora a cargo de las Operaciones en el País: | Gloria M. Grandolini            |
| Directora Sectorial:                             | Laura Tuck                      |
| Gerente Sectorial:                               | Guang Zhe Chen                  |
| Jefes del Equipo del Proyecto:                   | Greg Browder/Carmen Yee-Batista |

**COLOMBIA**  
**PROYECTO DE ADECUACIÓN HIDRÁULICA Y RECUPERACIÓN AMBIENTAL**  
**DEL RÍO BOGOTÁ**

**ÍNDICE**

|                                                                          | <b>Página</b> |
|--------------------------------------------------------------------------|---------------|
| <b>I. CONTEXTO ESTRATÉGICO Y FUNDAMENTOS.....</b>                        | <b>1</b>      |
| A. Cuestiones nacionales y sectoriales .....                             | 1             |
| B. Fundamentos para la participación del banco .....                     | 5             |
| C. Objetivos de nivel superior a los cuales contribuye el proyecto ..... | 5             |
| <b>II. DESCRIPCIÓN DEL PROYECTO .....</b>                                | <b>5</b>      |
| A. Instrumento de crédito .....                                          | 5             |
| B. Objetivo de desarrollo del proyecto e indicadores clave.....          | 6             |
| C. Componentes del proyecto .....                                        | 6             |
| D. Enseñanzas aprendidas y reflejadas en el diseño del proyecto.....     | 7             |
| E. Alternativas consideradas y razones para el rechazo .....             | 8             |
| <b>III. EJECUCIÓN.....</b>                                               | <b>8</b>      |
| A. Acuerdos de asociación (si corresponde) .....                         | 8             |
| B. Mecanismos institucionales y de ejecución .....                       | 8             |
| C. Seguimiento y evaluación de los efectos directos/resultados.....      | 9             |
| D. Sostenibilidad.....                                                   | 9             |
| E. Riesgos críticos y posibles aspectos controvertidos .....             | 9             |
| F. Condiciones y cláusulas del préstamo o crédito .....                  | 11            |
| <b>IV. RESUMEN DE LA EVALUACIÓN INICIAL.....</b>                         | <b>13</b>     |
| A. Análisis económico y financiero .....                                 | 13            |
| B. Aspectos técnicos.....                                                | 14            |
| C. Aspectos fiduciarios .....                                            | 15            |
| D. Aspectos sociales.....                                                | 16            |
| E. Aspectos ambientales.....                                             | 17            |
| F. Políticas de salvaguardia .....                                       | 19            |
| G. Excepciones en materia de políticas y condiciones de preparación..... | 19            |

|                                                                                                     |            |
|-----------------------------------------------------------------------------------------------------|------------|
| <b>Anexo 1: Antecedentes del país y del sector .....</b>                                            | <b>21</b>  |
| <b>Anexo 2: Principales proyectos relacionados financiados por el banco u otras entidades .....</b> | <b>30</b>  |
| <b>Anexo 3: Marco de resultados y seguimiento.....</b>                                              | <b>32</b>  |
| <b>Anexo 4: Descripción detallada del proyecto.....</b>                                             | <b>35</b>  |
| <b>Anexo 5: Costos del proyecto .....</b>                                                           | <b>39</b>  |
| <b>Anexo 6: Mecanismos de ejecución .....</b>                                                       | <b>41</b>  |
| <b>Anexo 7: Mecanismos de gestión financiera y desembolsos.....</b>                                 | <b>44</b>  |
| <b>Anexo 8: Mecanismos de adquisiciones .....</b>                                                   | <b>51</b>  |
| <b>Anexo 9: Análisis económico y financiero.....</b>                                                | <b>56</b>  |
| <b>Anexo 10: Cuestiones relativas a las políticas de salvaguardia .....</b>                         | <b>91</b>  |
| <b>Anexo 11: Preparación y supervisión del proyecto.....</b>                                        | <b>112</b> |
| <b>Anexo 12: Documentos incluidos en el archivo del proyecto .....</b>                              | <b>114</b> |
| <b>Anexo 13: Estado de préstamos y créditos .....</b>                                               | <b>117</b> |
| <b>Anexo 14: Reseña del país .....</b>                                                              | <b>122</b> |
| <b>Anexo 15: Mapas BIRF 37322, 37168, 37483.....</b>                                                | <b>125</b> |

# RESEÑA DE DATOS DEL DOCUMENTO DE EVALUACIÓN INICIAL DEL PROYECTO

Colombia

Proyecto de Adecuación Hidráulica y Recuperación Ambiental del Río Bogotá

## DOCUMENTO DE EVALUACIÓN INICIAL DEL PROYECTO

Oficina Regional de América Latina y el Caribe

Unidad de Abastecimiento de Agua y Saneamiento y Manejo de Desastres y Desarrollo Urbano

|                                                                                                                                                                                                                                                                                                                                                                                                                |                                                                                                                                                                                                                                                                                                                   |
|----------------------------------------------------------------------------------------------------------------------------------------------------------------------------------------------------------------------------------------------------------------------------------------------------------------------------------------------------------------------------------------------------------------|-------------------------------------------------------------------------------------------------------------------------------------------------------------------------------------------------------------------------------------------------------------------------------------------------------------------|
| <b>Fecha:</b> 11 de noviembre de 2010<br><b>Directora a cargo de las operaciones en el país:</b> Gloria M. Grandolini<br><b>Directora sectorial:</b> Laura Tuck<br><b>Gerente sectorial:</b> Guang Z. Chen<br><b>Jefes de los equipos:</b> Greg J. Browder y Carmen Yee-Batista<br><b>N.º de identificación del proyecto:</b> P111479<br><b>Instrumento de crédito:</b> Préstamo para una inversión específica | <b>Sector(es):</b> alcantarillado (70%); protección contra inundaciones (30%)<br><br><b>Tema(s):</b> gestión de la contaminación y salud ambiental (50%); gestión de recursos hídricos (25%); otras cuestiones de desarrollo urbano (25%)<br><br><b>Categoría de evaluación ambiental:</b> A: Evaluación completa |
|----------------------------------------------------------------------------------------------------------------------------------------------------------------------------------------------------------------------------------------------------------------------------------------------------------------------------------------------------------------------------------------------------------------|-------------------------------------------------------------------------------------------------------------------------------------------------------------------------------------------------------------------------------------------------------------------------------------------------------------------|

### Datos de financiamiento del proyecto

#### Condiciones propuestas:

El instrumento de financiamiento será un préstamo para una inversión específica por la cantidad de US\$250 millones por otorgarse a la Corporación Autónoma Regional de Cundinamarca (CAR), con garantía de la República de Colombia. El préstamo tendrá un margen fijo por encima de la tasa de oferta interbancaria de Londres (LIBOR), con un plazo de vencimiento de 14 años, un período de gracia de 4,5 años y una comisión inicial de 25 puntos básicos; no se cobrará comisión de compromiso. La CAR ha especificado un plan de amortización adaptado a sus necesidades financieras.

[X] Préstamo [ ] Crédito [ ] Donación [ ] Garantía [ ] Otro:

| Fuente                          | Monto total (millones de US\$) |
|---------------------------------|--------------------------------|
| Costo total del proyecto:       | 487                            |
| Cofinanciamiento:               |                                |
| Prestataria:                    | 237                            |
| Financiamiento total del Banco: | 250                            |
| BIRF                            | 250                            |
| AIF                             |                                |
| Nuevo                           |                                |
| Renovación                      |                                |

**Prestataria:** Corporación Autónoma de Cundinamarca

**Entidad responsable:**

Corporación Autónoma de Cundinamarca  
Carrera 7 n.º 36-45, Bogotá, Colombia

**Persona de contacto:**

Edgar Alfonso Bejarano Méndez

Director, Corporación Autónoma Regional de Cundinamarca

[direccion\\_general@car.gov.co](mailto:direccion_general@car.gov.co)

Teléfono: 57-1-320-9000

Sitio web: <http://www.car.gov.co>

**Desembolsos previstos (ejercicio del Banco/millones de US\$):**

| Ejercicio  | 2011 | 2012 | 2013 | 2014 | 2015 | 2016 |
|------------|------|------|------|------|------|------|
| Anual      | 2    | 10   | 50   | 60   | 80   | 48   |
| Acumulados | 2    | 12   | 62   | 122  | 202  | 250  |

Período de ejecución del proyecto: del 1 de marzo de 2011 al 30 de junio de 2016

Fecha prevista de entrada en vigor: 1 de marzo de 2011

Fecha prevista de cierre: 30 de junio de 2016

¿Se aparta el proyecto de las estrategias de asistencia a los países en cuanto a contenido y otros aspectos importantes?

☐ Sí ☒ No

En caso afirmativo, explicar:

¿Requiere el proyecto alguna excepción a las políticas del Banco?

☐ Sí ☒ No

¿Ha sido aprobada o ratificada (según corresponda) por la administración del Banco?

☐ Sí ☐ No

¿Se solicita que el Directorio Ejecutivo apruebe alguna excepción a las políticas?

☐ Sí ☒ No

En caso afirmativo, explicar:

¿Cumple el proyecto con los criterios regionales de preparación para la ejecución?

☒ Sí ☐ No

En caso negativo, explicar:

**Objetivo de desarrollo del proyecto:**

El objetivo del proyecto es ayudar a la prestataria a transformar el río Bogotá en un activo ambiental para la región metropolitana de Bogotá Distrito Capital mejorando la calidad del agua, reduciendo los riesgos de inundaciones y creando áreas multifuncionales a lo largo del río.

**Descripción del proyecto [resumen de una oración de cada componente]:**

Componente 1. Mejoramiento y ampliación de la Planta de Tratamiento de Aguas Residuales (PTAR) Salitre (US\$335 millones): Mejoramiento y ampliación de la PTAR Salitre, de una planta de tratamiento primario para un caudal de 4 metros cúbicos/segundo a una planta de tratamiento secundario para un caudal de aproximadamente 8 metros cúbicos/segundo.

Componente 2. Adecuación Hidráulica y Mejoramiento Ambiental (US\$140 millones): Reducción de los riesgos de inundaciones y creación de zonas multifuncionales a lo largo del río Bogotá.

Componente 3. Estudios ambientales y del agua (US\$7 millones): Realización de estudios para contribuir a la sostenibilidad ambiental del río Bogotá.

Componente 4. Gestión y administración del proyecto (US\$5 millones): Fortalecimiento de la capacidad de la prestataria para la ejecución diaria del proyecto.

**Políticas de salvaguardia que deben aplicarse:**

|                                                                    |                                                              |
|--------------------------------------------------------------------|--------------------------------------------------------------|
| Evaluación Ambiental (OP/BP 4.01)                                  | <input checked="" type="radio"/> Sí <input type="radio"/> No |
| Hábitats Naturales (OP/BP 4.04)                                    | <input checked="" type="radio"/> Sí <input type="radio"/> No |
| Bosques (OP/BP 4.36)                                               | <input type="radio"/> Sí <input checked="" type="radio"/> No |
| Control de Plagas (OP 4.09)                                        | <input checked="" type="radio"/> Sí <input type="radio"/> No |
| Recursos Culturales Físicos (OP/BP 4.11)                           | <input checked="" type="radio"/> Sí <input type="radio"/> No |
| Pueblos Indígenas (OP/BP 4.10)                                     | <input type="radio"/> Sí <input checked="" type="radio"/> No |
| Reasentamiento Involuntario (OP/BP 4.12)                           | <input checked="" type="radio"/> Sí <input type="radio"/> No |
| Seguridad de las Presas (OP/BP 4.37)                               | <input type="radio"/> Sí <input checked="" type="radio"/> No |
| Proyectos relativos a Cursos de Aguas Internacionales (OP/BP 7.50) | <input type="radio"/> Sí <input checked="" type="radio"/> No |
| Proyectos en Zonas en Disputa (OP/BP 7.60)                         | <input type="radio"/> Sí <input checked="" type="radio"/> No |

**Condiciones y obligaciones jurídicas**

| Referencia del acuerdo de financiamiento | Descripción de la condición/obligación                                                                                                                                               | Fecha de vencimiento         |
|------------------------------------------|--------------------------------------------------------------------------------------------------------------------------------------------------------------------------------------|------------------------------|
| ARTÍCULO V, cláusula 5.01 a)             | Constitución de la Unidad Ejecutora del Proyecto (UEP) y designación del jefe de proyecto de conformidad con el párrafo A.1 a) de la sección I del anexo 2 del Convenio de Préstamo. | Antes de la entrada en vigor |
| ARTÍCULO V, cláusula 5.02 b)             | Adopción por parte de la prestataria del manual operativo de conformidad con el párrafo B.1 de la sección I del anexo 2 del Convenio de Préstamo.                                    | Antes de la entrada en vigor |
|                                          |                                                                                                                                                                                      |                              |

## **I. CONTEXTO ESTRATÉGICO Y FUNDAMENTOS**

### **A. Cuestiones nacionales y sectoriales**

1. **Contexto nacional.** El presidente Juan Manuel Santos asumió su cargo el 7 de agosto de 2010, después de obtener el 70% de los votos en la segunda vuelta de las elecciones presidenciales. El país ha vivido una transformación desde 2002, cuando se encontraba asolado por la violencia interna y la debilidad de las instituciones. En la actualidad, Colombia experimenta una fuerte recuperación de la economía, y el panorama es prometedor. Antes de 2008, el país tuvo un período de crecimiento económico acelerado y de base relativamente amplia impulsado por un entorno externo favorable y la mayor seguridad interna. Colombia no se vio gravemente afectada por la crisis mundial y tuvo una expansión positiva de 0,8% en 2009 (comparada con una contracción de 1,9% en la región de América Latina y el Caribe), en parte debido a las oportunas políticas anticíclicas.

2. Las políticas acertadas, respaldadas por marcos normativos fiscales y monetarios adecuados, contribuyen al sólido desempeño macroeconómico y la menor vulnerabilidad. La inflación se mantuvo en niveles bajos, de alrededor del 2%. El régimen de tipo de cambio flexible (respaldado por intervenciones limitadas y basadas en normas) estuvo bajo cierta presión en 2010 debido a que el peso colombiano se convirtió en una de las monedas más apreciadas de los mercados emergentes. La fortaleza del peso colombiano obedece al repentino aumento de la afluencia de capital neto (causado por el fuerte crecimiento de las inversiones extranjeras directas), los sólidos ingresos por exportaciones y la acumulación de la deuda externa. La política fiscal mantuvo la flexibilidad durante la recuperación, con un déficit previsto del Gobierno central de 4,3% en 2010 y 4,1% en 2011. En la primavera de 2010, Colombia renovó la línea de crédito flexible por US\$3500 millones con el Fondo Monetario Internacional, lo cual, combinado con las sólidas reservas, ayuda a reducir la vulnerabilidad externa.

3. **Contexto sectorial.** Durante la última década, Colombia también dio importantes pasos tendientes a mejorar los servicios de abastecimiento de agua y saneamiento. Según las directrices de las Naciones Unidas, en 2008, Colombia tuvo una mejora de los servicios de abastecimiento de agua y saneamiento del 92% y del 74%, respectivamente, cifras similares al promedio regional del 93% para abastecimiento de agua y el 79% para saneamiento. La cobertura urbana es prácticamente universal en Colombia, con porcentajes del 98% para abastecimiento de agua y del 81% para saneamiento; sin embargo, la cobertura en las áreas rurales está rezagada, siendo del 73% para abastecimiento de agua y del 55% para saneamiento.

4. La tasa de tratamiento de aguas residuales en Colombia es relativamente baja: solo el 25% de las aguas residuales reciben algún tipo de tratamiento. Muchos de los ríos que atraviesan áreas urbanas, como en Bogotá, Medellín y Cali, están muy contaminados; además, las ciudades costeras como Cartagena y Barranquilla tienen problemas con la calidad del agua en los estuarios y las áreas próximas a la costa. En 2004, el Ministerio de Ambiente, Vivienda y Desarrollo Territorial (MAVDT) creó el Plan Nacional de Manejo de Aguas Residuales Municipales, que ayudó a establecer el marco para la rápida evolución de programas de manejo de aguas residuales en las grandes áreas urbanas. En la actualidad, en todas las grandes ciudades de Colombia se están poniendo en marcha importantes programas de inversiones para abordar los problemas de contaminación del agua.

5. La ciudad de Bogotá, con una población que ronda los 7 millones de habitantes, vierte todas sus aguas residuales (de las cuales solo el 20% recibe tratamiento primario) en el río Bogotá. Dicho río, cuya cuenca se encuentra completamente dentro de Colombia, nace a una altura de 3400 metros y recorre 370 kilómetros antes de desembocar en el río Magdalena, a una altura de 280 metros. El río Magdalena desemboca en el mar Caribe. Por lo tanto, el proyecto no requiere la puesta en práctica de la política del Banco sobre Proyectos relativos a Cursos de Aguas Internacionales. La cuenca cubre 5400 kilómetros cuadrados y se divide en tres partes: i) la cuenca superior al norte de Bogotá; ii) la cuenca media en el área metropolitana de Bogotá, y iii) la cuenca inferior al sur de Bogotá. En la estación seca, el caudal promedio que ingresa a la ciudad de Bogotá es de aproximadamente 12 metros cúbicos/segundo, y la ciudad vierte 22 metros cúbicos/segundo adicionales de aguas residuales, lo cual se traduce en niveles sumamente elevados de contaminación del agua.

6. Al salir de Bogotá, el río desciende abruptamente 2000 metros en un corto trecho hasta llegar al valle del río Magdalena. La Empresa de Energía de Bogotá S.A. (EMGESA) construyó una central de energía hidroeléctrica aguas abajo de Bogotá para aprovechar el caudal y el desnivel del río. La presa de la central de energía de EMGESA es el embalse del Muña, de 853 hectáreas, que también está muy contaminado. Las espectaculares cataratas de Tequendama también se encuentran aguas abajo de Bogotá. El río Bogotá enfrenta tres problemas ambientales principales: degradación de la calidad del agua, inundaciones y deterioro ecológico.

7. En 1994, el Gobierno de Bogotá Distrito Capital celebró un contrato de concesión de construcción-operación-transferencia (COT) con un consorcio internacional privado para una PTAR primaria de 4 metros cúbicos/segundo denominada “Salitre”, que se encuentra en el norte de Bogotá. La planta inició las operaciones en el año 2000 y, en diciembre de 2003, el Gobierno de Bogotá Distrito Capital canceló el contrato, compró la planta al consorcio y transfirió las operaciones a la Empresa de Acueducto y Alcantarillado de Bogotá (EAAB).

8. En diciembre de 2004, el Departamento Nacional de Planeación (DNP) emitió un documento de planificación estratégica para el río Bogotá (CONPES 3320), que disponía el mejoramiento y la ampliación de la planta Salitre a alrededor de 8 metros cúbicos/segundo y la construcción de una planta grande (de aproximadamente 14 metros cúbicos/segundo) aguas abajo de Bogotá, denominada “Canoas”. La planta Salitre tratará las aguas residuales provenientes del norte de Bogotá y proporcionará agua tratada para mantener los caudales ambientales en el río Bogotá, y posiblemente complementará el abastecimiento de agua para el vecino distrito de riego La Ramada. Las aguas residuales del resto de Bogotá se recolectarán y se enviarán aguas abajo hasta la futura planta Canoas, ubicada a unos 8 kilómetros al sur de Bogotá. En la actualidad, la EAAB está construyendo los grandes interceptores que conducirán las aguas residuales a la planta Canoas. Además, el documento CONPES dispuso la ampliación del tratamiento de aguas residuales en la cuenca superior, así como también una serie de medidas provisionales para mitigar los impactos ambientales relacionados con el embalse del Muña.

9. La CAR es la autoridad ambiental regional a cargo de la cuenca del río Bogotá. Está gobernada por una estructura de tres niveles que consta de una asamblea corporativa, un consejo directivo y un director general. La Asamblea Corporativa es un organismo de supervisión

conformado por representantes legales de todos los Gobiernos territoriales de la jurisdicción geográfica de la CAR. El Consejo Directivo es la autoridad administrativa de la CAR y está compuesto por el Gobernador del Departamento de Cundinamarca, representantes de la Presidencia y del MAVDT, y representantes elegidos de los municipios, el sector privado, la comunidad indígena y organizaciones no gubernamentales (ONG). El Director General es la autoridad ejecutiva de la CAR, y su mandato dura cuatro años. La CAR tiene autonomía financiera y recibe el 15% de los ingresos resultantes del impuesto predial de los municipios de su jurisdicción. La CAR posee y administra distintos tipos de activos, como parques e infraestructura hidráulica; además, brinda orientación para las iniciativas de planificación regional y establece los parámetros de calidad del agua.

10. En 2006, la CAR publicó el Plan de Ordenación y Manejo de la Cuenca Hidrográfica del Río Bogotá (POMCA). En función del POMCA, en 2006, la CAR publicó los parámetros de calidad del agua para la cuenca, en los cuales se fijan metas de calidad del agua para el año 2020. El objetivo es lograr parámetros de calidad del agua de clase IV, adecuada para el uso agrícola en la cuenca media, que está conformada principalmente por el área metropolitana de Bogotá. Aguas abajo de Bogotá, después del embalse del Muña, la meta provisional es lograr un parámetro de clase V, calidad adecuada para la industria y la generación de energía<sup>1</sup>. En 2007, el MAVDT otorgó una licencia ambiental a la EAAB para ampliar la PTAR Salitre a una planta de tratamiento secundario de aproximadamente 8 metros cúbicos/segundo, con requisitos de descarga de 30 miligramos/litro de demanda bioquímica de oxígeno (DBO) y 30 miligramos/litro de sólidos en suspensión totales (SST). Los modelos de calidad del agua indicaron que este nivel de tratamiento sería suficiente para cumplir con los parámetros de calidad del agua de clase IV hasta la planta Canoas.

11. Como complemento del POMCA, cada municipio debe preparar un Plan de Saneamiento y Manejo de Vertimientos, (PSMV) para demostrar cómo contribuirá al logro de las metas generales de calidad del agua establecidas en el POMCA. El PSMV es aprobado por la CAR y sirve de base para la planificación de las inversiones tendientes a controlar la contaminación del agua. Los pequeños municipios de la cuenca del río Bogotá representan alrededor del 20% del total de aguas residuales generadas en la cuenca. Desde 2009, 37 de los 40 municipios, incluido Bogotá, han presentado PSMV a la CAR para su aprobación, pero solo se aprobaron tres de ellos. De los 40 municipios de la cuenca (excluido Bogotá), 22 tienen PTAR, que tratan alrededor de la mitad de las aguas residuales generadas. Actualmente, la CAR trabaja con los municipios para facilitar el mejoramiento y la ampliación de las plantas existentes, y la construcción de nuevas PTAR.

12. Financiar el ambicioso programa de aguas residuales de Bogotá también resultó un desafío. Durante la última década, la EAAB dejó de ser una compañía ineficiente con dificultades económicas para convertirse en una empresa de servicios públicos sólida en términos financieros y operativos. La EAAB es de propiedad absoluta del Gobierno de Bogotá Distrito Capital, que la gobierna, y tiene capacidad para financiar la mayoría de las inversiones de capital necesarias.

---

<sup>1</sup> Los principales contaminantes de la clase IV incluyen 50 miligramos/litro de demanda bioquímica de oxígeno a los cinco días (DBO<sub>5</sub>), 40 miligramos/litro de SST y 20 000 coliformes totales. Clase V: 70 miligramos/litro de DBO<sub>5</sub>, 50 miligramos/litro de SST, y no se aplica para los coliformes totales.

13. En 2007, la CAR, la EAAB y la Secretaría Distrital de Ambiente (SDA) de Bogotá, en calidad de representante de Bogotá Distrito Capital, firmaron el Convenio 171. La principal motivación para celebrar dicho convenio fue responder a la resolución del Tribunal de Cundinamarca, que en 2004 había ordenado a las entidades gubernamentales responsables que abordaran los problemas de contaminación del agua en el río Bogotá. El convenio requiere que la CAR financie la ampliación y el mejoramiento de la planta Salitre, la mejora de las obras del río en Bogotá, y posiblemente la conducción de una parte de las aguas residuales tratadas hasta el punto de captación del distrito de riego La Ramada, ubicado unos 3 kilómetros aguas arriba de la planta Salitre. La CAR creó una cuenta especial para el programa de aguas residuales de Bogotá, denominada “Fondo para las Inversiones Ambientales en el Perímetro Urbano de Bogotá” (FIAB), que es una cuenta financiada con la mitad de los ingresos resultantes del impuesto predial transferidos de Bogotá Distrito Capital a la CAR; es decir, la mitad del 15% de los ingresos resultantes del impuesto predial de Bogotá que se transfieren al FIAB. La EAAB aceptó asumir la responsabilidad del financiamiento de la construcción de los grandes interceptores para Canoas, mientras que el financiamiento de la PTAR Canoas quedó pendiente para analizarlo más detenidamente.

14. Además de mejorar la calidad del agua en el río Bogotá, la CAR tiene un ambicioso programa para recuperar el ecosistema del río y reducir los riesgos de inundaciones. Antes de 1950, en la cuenca media, el Bogotá era un río serpenteante con una amplia zona ribereña, extensas llanuras aluviales y un ecosistema productivo. Desde 1950, el rápido desarrollo urbano no solo ha producido el deterioro de la calidad del agua del río, sino también la canalización del río, la destrucción de los humedales y el crecimiento de comunidades de ingreso bajo a lo largo del río que son propensas a las inundaciones.

15. En 1950, según las estimaciones, había 50 000 hectáreas de humedales conectadas con el río Bogotá. En 2009, había menos de 1000 hectáreas de humedales, gran parte de los cuales están degradados debido a la mala calidad del agua. En Bogotá ha surgido un decidido movimiento ambientalista que promueve activamente la protección y la expansión de los humedales. En 2006, el Gobierno de Bogotá Distrito Capital aprobó una política integral de gestión de humedales. En la actualidad, dicho Gobierno, la EAAB y la CAR trabajan para proteger los humedales del río.

16. Existe un gran apoyo público para la recuperación integral del río Bogotá. En una encuesta realizada en 2008 a los residentes de Bogotá, la contaminación del río Bogotá fue calificada como el segundo problema ambiental más urgente de la ciudad. El 48% de los encuestados consideró que la contaminación del agua del río Bogotá era un problema ambiental importante, mientras que el 52% identificó la congestión de tránsito como un problema importante.

17. El Convenio 171 (2007) también asignó a la CAR la responsabilidad de las obras de protección contra inundaciones en el área metropolitana de Bogotá. El nivel más bajo de protección contra inundaciones a lo largo del río Bogotá se calcula que es de alrededor de 10 años (es decir, el desbordamiento de los diques una vez cada 10 años, aunque muchas de las áreas urbanas más vulnerables tienen un nivel mucho más alto de protección contra

inundaciones). La norma de diseño urbano en Bogotá es de 100 años. La CAR está incorporando objetivos ambientales en el programa de obras de prevención de inundaciones mediante la ampliación y la protección de la zona ribereña, la restauración de los meandros del río y la conexión hidráulica del río con sus llanuras aluviales. Al mismo tiempo, la SDA y la EAAB, que son responsables de los humedales ubicados dentro de la ciudad, tienen un programa activo para la mejora de los humedales a lo largo del río.

## **B. Fundamentos para la participación del Banco**

18. El Banco Mundial puede aportar conocimientos especializados internacionales para ayudar a perfeccionar el programa general de manejo de aguas residuales de Bogotá e integrar las inversiones en una perspectiva más amplia de desarrollo urbano y gestión ambiental. En las últimas décadas, el Banco Mundial ha participado intensamente en las cuestiones relativas al desarrollo urbano, abastecimiento de agua y saneamiento en Bogotá.

19. El Banco ha respaldado al sector del agua en Bogotá a través de cinco operaciones, de las cuales el proyecto más reciente, Santa Fe I, finalizó en 2005 con calificaciones satisfactorias. Durante el proyecto Santa Fe, la EAAB avanzó considerablemente hacia el logro del objetivo de política clave de convertirse en una empresa comercial de abastecimiento de agua con una cultura corporativa basada en la responsabilidad y la rendición de cuentas profesionales. En 2003, dicha empresa contrató tres firmas para proporcionar servicios de atención al cliente y la operación y el mantenimiento de su sistema de distribución de agua de diámetro reducido. En el marco del proyecto Santa Fe, la EAAB puso en marcha el proceso de restauración de los humedales urbanos que desaguan en el río Bogotá.

20. El Banco también ha respaldado el programa de desarrollo general de Bogotá, el caso más reciente fue a través del Proyecto de Servicios Urbanos de Bogotá, que se aprobó en 2003. Dicho proyecto se orienta especialmente a las cuestiones relacionadas con las viviendas asequibles, la mejora de los asentamientos marginales, la mejora del transporte público, el mantenimiento integral de la red vial y la coordinación interinstitucional. El Banco ha financiado partes del sistema de autobuses de tránsito rápido Transmilenio; además, participa en el diálogo sobre políticas relativas a una serie de desafíos en materia de desarrollo urbano.

## **C. Objetivos de nivel superior a los cuales contribuye el proyecto**

21. El proyecto propuesto es congruente con la estrategia de alianza con el país (EAP) de Colombia-Grupo del Banco Mundial para los ejercicios de 2008 a 2011 (Informe n.º 42847-CO, analizado por los Directores Ejecutivos el 8 de abril de 2008) y el Informe sobre la marcha de la EAP (Informe n.º 52878, ratificado el 12 de abril 2010), que destaca la sostenibilidad ambiental, en particular, la gestión integrada de los recursos hídricos, como uno de los cinco pilares de la estrategia de desarrollo nacional de Colombia.

# **II. DESCRIPCIÓN DEL PROYECTO**

## **A. Instrumento de crédito**

22. El instrumento de financiamiento será un préstamo para una inversión específica por la cantidad de US\$250 millones por otorgarse a la CAR, con garantía de la República de Colombia. El préstamo tendrá un margen fijo por encima de la tasa LIBOR, con un plazo de vencimiento de 14 años, un período de gracia de 4,5 años y una comisión inicial de 25 puntos básicos; no se cobrará una comisión por compromiso. La CAR ha especificado un plan de amortización adaptado a sus necesidades financieras.

### **B. Objetivo de desarrollo del proyecto e indicadores clave**

23. El objetivo del proyecto es ayudar a la prestataria a transformar el río Bogotá en un activo ambiental para la región metropolitana de Bogotá Distrito Capital mejorando la calidad del agua, reduciendo los riesgos de inundaciones y creando áreas multifuncionales a lo largo de dicho río. Los indicadores clave son los siguientes:

- una calidad del agua en la cuenca media del río Bogotá que cumpla con los parámetros de calidad del agua de clase IV para DBO (50 miligramos/litro) y SST (40 miligramos/litro);
- protección contra inundaciones del río Bogotá en el área metropolitana de Bogotá con una norma de diseño para un período de retorno de las inundaciones de, al menos, 100 años (es decir, menos del 1% de probabilidades de desbordamiento por año);
- la recuperación de ocho áreas multifuncionales a lo largo del río Bogotá con una superficie de aproximadamente 175 hectáreas y las siguientes características: zonas de inundaciones, hábitat ecológico y espacios públicos.

### **C. Componentes del proyecto**

24. Componente 1. Mejoramiento y ampliación de la PTAR Salitre (US\$335 millones): Mejoramiento y ampliación de la PTAR Salitre para transformarla de una planta de tratamiento primario de 4 metros cúbicos/segundo en una planta de tratamiento secundario de alrededor de 8 metros cúbicos/segundo para tratar, conducir y descargar las aguas residuales de las microcuencas Salitre, Torca y Jaboque al río Bogotá y posiblemente al distrito de riego La Ramada, incluida la prestación de servicios de consultoría para su diseño, construcción y supervisión.

25. Componente 2. Adecuación Hidráulica y Mejoramiento Ambiental (US\$140 millones): Reducción del riesgo de inundaciones y creación de zonas multifuncionales a lo largo del río Bogotá mediante la realización de obras de control de inundaciones y mejoras ambientales, entre las que se incluyen el dragado del río, la construcción de terraplenes, la restauración de hábitats ribereños, meandros y humedales, la adquisición de tierras, el desplazamiento involuntario de personas, el paisajismo y la creación de parques, y la prestación de servicios de consultoría para su diseño, construcción y supervisión.

26. Componente 3. Estudios ambientales y del agua (US\$7 millones): Realización de estudios para contribuir a la sostenibilidad ambiental del río Bogotá, incluida la elaboración de lo siguiente: i) un plan de gestión integral de recursos hídricos para la cuenca del río Bogotá; ii) un plan maestro de biosólidos para la región metropolitana de Bogotá Distrito Capital, y iii) un plan de gestión para el río Bogotá, y la prestación de los servicios de consultaría correspondientes.

27. Componente 4. Gestión y administración del proyecto (US\$5 millones): Fortalecimiento de la capacidad de la prestataria para la ejecución diaria del proyecto, lo que incluye i) cumplimiento de la gestión financiera, ambiental y de adquisiciones; requisitos de presentación de informes, y control y supervisión de actividades; ejecución del Plan de Acción para el Reasentamiento (PAR) y el Plan de Gestión Ambiental (PGA); ii) la realización de una campaña de difusión pública; iii) capacitación, y iv) la prestación de los servicios de consultoría correspondientes.

#### **D. Enseñanzas aprendidas y reflejadas en el diseño del proyecto**

28. *Manejo integral de aguas residuales.* A pesar de que la PTAR Salitre ha estado en funcionamiento durante más de una década, no ha habido una mejora considerable de la calidad del agua del río Bogotá debido a que el 80% de las aguas residuales de la ciudad siguen vertiéndose sin tratar en el río. Antes de la ampliación y el mejoramiento de la planta Salitre, que se encuentra aguas arriba de Bogotá y que tratará aproximadamente el 30% de las aguas residuales, es necesario garantizar la existencia de un plan integral de manejo de aguas residuales, tanto dentro de la ciudad de Bogotá como aguas arriba.

29. La CAR trabaja con numerosos municipios pequeños, que aportan alrededor del 20% de la carga total de contaminación, a fin de desarrollar un programa integral de manejo de aguas residuales que aumentará el tratamiento global de alrededor del 40% a más del 80% para 2015. Además, la EAAB está construyendo grandes interceptores de aguas residuales para recolectar el 70% de las aguas residuales de Bogotá y conducir las aguas abajo de Bogotá. La combinación de los interceptores de la EAAB y los programas de aguas residuales aguas arriba ayudará a garantizar el logro de los objetivos de calidad del agua en la cuenca media en el marco del proyecto.

30. Se reconoce que este enfoque no aborda de manera directa los problemas de calidad del agua en la cuenca inferior del río Bogotá (es decir, aguas abajo de Bogotá). Gran parte de las aguas residuales de Bogotá se conducirán hasta la futura planta de tratamiento en Canoas, y los problemas de calidad del agua en el embalse del Muña y aguas abajo de Bogotá continuarán en el mediano plazo. A fin de tratar estos asuntos y planificar la próxima etapa del programa de aguas residuales de Bogotá, el diseño del proyecto incluye servicios de consultoría para ayudar a confeccionar un plan de gestión integral de los recursos hídricos de la cuenca que creará el marco para la próxima etapa de objetivos y programas de gestión de los recursos hídricos.

31. *Incorporación del diseño ecológico en las obras de control de inundaciones.* Por lo general, los proyectos de control de inundaciones urbanas se concentran exclusivamente en reducir los riesgos de inundaciones mediante la profundización y la canalización de ríos o la construcción de terraplenes. Este enfoque a menudo se traduce en un río con poco valor ecológico, debido a que se eliminan las zonas ribereñas, los meandros y las llanuras aluviales. El diseño del proyecto aborda algunas de estas deficiencias típicas a través de la restauración de meandros, la colocación de diques tan lejos como sea prácticamente posible para crear zonas ribereñas y el mantenimiento de las conexiones hidráulicas con los humedales colindantes. En lugar de solo reducir el riesgo de inundaciones, el proyecto tiene como objetivo crear un río dinámico y multifuncional con valor ecológico y recreativo.

32. ***Manejo de los biosólidos de las PTAR.*** Las plantas de tratamiento de aguas residuales producen grandes cantidades de biosólidos que deben ser tratados y dispuestos. Por lo general, los costos del manejo de biosólidos representan, al menos, el 30% de los costos operativos totales de la planta y constituyen una gran dificultad para la gestión. A fin de abordar este asunto, el diseño del proyecto incluye asistencia técnica para elaborar un plan maestro de biosólidos que ayudará a la EAAB y la CAR a enfrentar los desafíos a mediano y largo plazo del manejo de biosólidos. En el corto plazo, los biosólidos de la planta Salitre se eliminarán en un vertedero específico para lodos o se enviarán a un vertedero para mejorar el material de la cobertura final. En función de los resultados del Plan Maestro de Biosólidos, es posible que sea necesario construir plantas especializadas de tratamiento de lodos, que incluyan por ejemplo, secado térmico, en la PTAR Salitre.

#### **E. Alternativas consideradas y razones para el rechazo**

33. ***Préstamo adaptable para programas.*** Se consideró la posibilidad de utilizar un préstamo adaptable para programas (APL) para respaldar el manejo de aguas residuales en toda la cuenca. Esta alternativa se rechazó principalmente debido a motivos institucionales y al hecho de que el Gobierno nacional no solicitó al Banco financiamiento para otros aspectos del programa de limpieza del río Bogotá.

34. ***Ejecución de la PTAR Salitre por parte de la EAAB.*** Según el Convenio 171, la CAR es responsable de financiar la PTAR Salitre. Se consideró la posibilidad de permitir que la EAAB estuviera a cargo de la ejecución de la planta Salitre, pero esta opción se consideró inviable desde el punto de vista institucional y legal. La CAR, como organismo responsable del financiamiento, prefiere conservar la responsabilidad general de la ejecución de la planta Salitre. De conformidad con el Convenio 171, la EAAB y la CAR constituyeron un comité directivo para supervisar el megaproyecto de aguas residuales de Bogotá, especialmente la planta Salitre. Luego de la puesta en servicio de la planta Salitre, las operaciones y el mantenimiento estarán a cargo de la EAAB y se financiarán mediante tarifas y, si fuera necesario, con el respaldo financiero de Bogotá Distrito Capital.

### **III. EJECUCIÓN**

#### **A. Acuerdos de asociación (si corresponde)**

35. Durante la preparación del proyecto, no se identificaron acuerdos directos de asociación con otras organizaciones internacionales. Si otras organizaciones internacionales intervinieran en el programa general de mejora del río Bogotá, el Banco garantizará los acuerdos de coordinación y asociación pertinentes.

#### **B. Mecanismos institucionales y de ejecución**

36. La CAR será la prestataria y será responsable de todos los aspectos de la ejecución del proyecto, incluida la ampliación de la planta Salitre en el marco del componente 1. Dado que la EAAB continuará a cargo de las operaciones de la planta Salitre, la CAR y la EAAB han establecido mecanismos de coordinación a través del Comité Directivo del Convenio 171 para

ayudar a abordar los aspectos de diseño, construcción y puesta en servicio de la ampliación de la planta Salitre. El Comité Directivo está conformado por el Director de la CAR y el Gerente General de la EAAB. Después de la puesta en servicio de la ampliación de la planta Salitre, la EAAB asumirá la responsabilidad de la operación y el mantenimiento de la nueva infraestructura. Esto se acordó en el Convenio 171, que se firmó en 2007. Algunos de los programas de asistencia técnica propuestos en el componente 3, en particular, el Plan de Gestión Integral de los Recursos Hídricos de la Cuenca y el Plan Maestro de Biosólidos, también afectan a la EAAB. La CAR será la empleadora para estos contratos de consultoría pero colaborará con la EAAB en estas actividades de conformidad con las condiciones generales del Convenio 171. Además, otras partes interesadas participarán en el proceso, incluido el MAVDT.

37. La CAR será responsable de la construcción y la operación de las obras del río en el marco del componente 2. La responsabilidad de las obras de adecuación hidráulica y mejoramiento ambiental a lo largo del río se transfirió formalmente de la EAAB a la CAR mediante el Convenio 171. El río Bogotá es la frontera entre Bogotá Distrito Capital y cinco municipios, pero la EAAB solo tenía jurisdicción formal sobre el terraplén izquierdo del río. A fin de evitar complicaciones entre jurisdicciones, se acordó que la CAR sería la propietaria y la encargada de mantener las obras del río de forma integrada.

### **C. Seguimiento y evaluación de los efectos directos/resultados**

38. La CAR será responsable de todos los aspectos de seguimiento y evaluación del proyecto. La CAR cuenta con un completo sistema de seguimiento hidrometeorológico y de calidad del agua, y podrá realizar un seguimiento de la calidad del agua. Además, la CAR llevará registros de las inundaciones causadas por el desbordamiento o el colapso de los terraplenes del río.

### **D. Sostenibilidad**

39. Se considera que el proyecto es sostenible debido a la sólida situación financiera de la CAR y la EAAB, y al alto nivel de apoyo público para la mejora del río Bogotá. La CAR recibe un flujo de financiamiento específico del Gobierno de Bogotá Distrito Capital que se basa en un porcentaje del impuesto predial. La CAR utilizará parte de estos recursos para garantizar la operación y el mantenimiento de las obras del río Bogotá, en coordinación con otras entidades gubernamentales responsables. Actualmente la EAAB tiene una sólida posición financiera, y las proyecciones financieras indican que podrá operar y mantener la planta Salitre solo con aumentos moderados de las tarifas y, si fuera necesario, el apoyo financiero del Gobierno de Bogotá Distrito Capital.

### **E. Riesgos críticos y posibles aspectos controvertidos**

40. En el cuadro 1, se presenta la evaluación del riesgo general del proyecto.

**Cuadro 1: Resumen de la matriz de riesgos del proyecto**

| Gestión, políticas e instituciones sectoriales |                        |                       |                                               |
|------------------------------------------------|------------------------|-----------------------|-----------------------------------------------|
| Factores de riesgo                             | Descripción del riesgo | Medidas de mitigación | Calificación <sup>a</sup> del riesgo residual |

|                                                       |                                                                                                                                                                                                                                                                                                                                                                                                                                                                       |                                                                                                                                                                                                                                                                                                                                                                                                                                                                                                                                                                                                                                            |   |
|-------------------------------------------------------|-----------------------------------------------------------------------------------------------------------------------------------------------------------------------------------------------------------------------------------------------------------------------------------------------------------------------------------------------------------------------------------------------------------------------------------------------------------------------|--------------------------------------------------------------------------------------------------------------------------------------------------------------------------------------------------------------------------------------------------------------------------------------------------------------------------------------------------------------------------------------------------------------------------------------------------------------------------------------------------------------------------------------------------------------------------------------------------------------------------------------------|---|
| <b>Gestión, políticas e instituciones sectoriales</b> | Colombia tiene instituciones y políticas sectoriales consolidadas que funcionan debidamente. El MAVDT es responsable de establecer las políticas sectoriales. La reglamentación está a cargo de las siguientes instituciones: i) la Comisión de Regulación de Agua Potable y Saneamiento Básico (CRA), en el caso de la reglamentación económica, y ii) la Superintendencia de Servicios Públicos Domiciliarios (SSPD), en el caso de la reglamentación de servicios. | El equipo del Banco seguirá supervisando el rendimiento y las políticas sectoriales generales mediante las interacciones en curso con el MAVDT.                                                                                                                                                                                                                                                                                                                                                                                                                                                                                            | M |
| <b>Riesgos específicos de la operación</b>            |                                                                                                                                                                                                                                                                                                                                                                                                                                                                       |                                                                                                                                                                                                                                                                                                                                                                                                                                                                                                                                                                                                                                            |   |
| <b>Coordinación entre la CAR y la EAAB</b>            | Según se establece en el Convenio 171, la CAR es responsable del financiamiento y la ejecución de la ampliación de la planta Salitre, mientras que la EAAB está encargada de la operación de la planta. La CAR y la EAAB deberán colaborar entre sí para garantizar el éxito en el diseño y la construcción de la planta.                                                                                                                                             | La EAAB y la CAR han constituido un Comité Directivo para supervisar la ejecución del proyecto. La CAR contratará consultores para supervisar el diseño y la construcción de la planta Salitre, y el equipo del Banco ayudará a facilitar la cooperación técnica.                                                                                                                                                                                                                                                                                                                                                                          | S |
| <b>Reasentamiento</b>                                 | La CAR deberá adquirir porciones de terrenos de aproximadamente 164 parcelas privadas y 47 parcelas institucionales, y reubicar 188 unidades sociales en los barrios pobres El Porvenir I y II. La CAR tiene una experiencia limitada en reasentamientos. Además, la reubicación de los vecinos de El Porvenir requerirá una estrecha coordinación con el municipio de Mosquera.                                                                                      | La CAR ha reforzado su equipo de reasentamientos con profesionales experimentados. Ha preparado un PAR que cumple con la OP 4.12 y se ha comprometido a ejecutar dicho plan. La CAR es muy consciente de que se deben evitar los problemas relativos a la adquisición de tierras y el reasentamiento para llevar a cabo con éxito el proyecto.                                                                                                                                                                                                                                                                                             | M |
| <b>Sostenibilidad de la EAAB</b>                      | La EAAB será la encargada de operar las nuevas PTAR y de cubrir los costos operativos principalmente mediante tarifas. Las tarifas actuales son adecuadas solo para cubrir los sistemas de recolección y deberán aumentarse para cubrir los costos del tratamiento.                                                                                                                                                                                                   | La EAAB no tendrá que financiar la ampliación de la planta Salitre. La EAAB tiene una sólida situación financiera, y los análisis financieros indican que las tarifas solo deberán aumentarse, en promedio, un 10% para cubrir los costos del tratamiento de aguas residuales durante los próximos cinco años. El sistema normativo económico, administrado por la CRA, permite que las empresas de servicios públicos traspasen los costos aprobados, como las plantas de tratamiento de aguas residuales. El Distrito también facilitará recursos adicionales para ayudar a garantizar la sostenibilidad financiera, si fuera necesario. | M |
| <b>Gestión de la cuenca hidrográfica superior</b>     | Hay una serie de municipios pequeños en las cuencas superior y media del río Bogotá que aportan aproximadamente entre el 15% y el 20% de la carga total                                                                                                                                                                                                                                                                                                               | El equipo del Banco realizará un seguimiento de la situación, pero tiene escasa influencia sobre las fuentes de financiamiento y la                                                                                                                                                                                                                                                                                                                                                                                                                                                                                                        | M |

|                                |                                                                                                                                                                                                                                                                                                                                                                                                                                                                                                                                                                      |                                                                                                                                                                                                                                                                                                                                                                           |          |
|--------------------------------|----------------------------------------------------------------------------------------------------------------------------------------------------------------------------------------------------------------------------------------------------------------------------------------------------------------------------------------------------------------------------------------------------------------------------------------------------------------------------------------------------------------------------------------------------------------------|---------------------------------------------------------------------------------------------------------------------------------------------------------------------------------------------------------------------------------------------------------------------------------------------------------------------------------------------------------------------------|----------|
|                                | <p>de contaminación del río. La CAR actualmente posee y gestiona 22 PTAR, que tratan alrededor del 40% de las aguas residuales municipales.</p> <p>Por orden judicial, la CAR está transfiriendo la propiedad y la operación de las PTAR municipales a los municipios, lo cual genera cierta preocupación sobre la sostenibilidad a largo plazo.</p> <p>Si bien la CAR ha trabajado con los municipios en la preparación de los planes maestros de abastecimiento de agua y saneamiento, la fuente de financiamiento para estas inversiones todavía es incierta.</p> | <p>velocidad de la ejecución.</p> <p>Los estudios de modelos muestran que, si se mantienen los niveles actuales de tratamiento de los municipios pequeños, es posible que se logren los objetivos de calidad del agua de clase IV en Bogotá después de la ampliación y el mejoramiento de la planta Salitre.</p>                                                          |          |
| <b>Gestión financiera</b>      | <p>La CAR no ha ejecutado proyectos financiados por el Banco anteriormente, pero tiene experiencia previa con el Banco Interamericano de Desarrollo (BID).</p> <p>El monto del préstamo propuesto es relativamente alto, pero la ejecución del proyecto se concentra en una sola entidad (la CAR) y en actividades específicas con mecanismos de flujo de fondos que, cabe suponer, serán simples.</p>                                                                                                                                                               | <p>La CAR es una corporación autónoma supervisada por la Contraloría General de la República (CGR).</p> <p>La evaluación de la gestión financiera confirmó la fortaleza de los sistemas actuales.</p>                                                                                                                                                                     | <b>M</b> |
| <b>Adquisiciones</b>           | <p>La CAR no ha ejecutado proyectos financiados por el Banco anteriormente, pero tiene experiencia previa en adquisiciones con el BID.</p> <p>El proyecto comprende una serie de importantes contratos de obras civiles, incluido un contrato llave en mano por US\$322 millones para la PTAR Salitre.</p>                                                                                                                                                                                                                                                           | <p>El personal de la CAR ha recibido capacitación sobre los procedimientos de adquisiciones del Banco. La CAR ha contratado un consultor con experiencia en adquisiciones para que brinde asistencia.</p> <p>El proyecto financiará un importante contrato de asistencia técnica para Salitre, que brindará asistencia en materia de adquisiciones para dicha planta.</p> | <b>M</b> |
| <b>Riesgo mitigado general</b> |                                                                                                                                                                                                                                                                                                                                                                                                                                                                                                                                                                      |                                                                                                                                                                                                                                                                                                                                                                           | <b>M</b> |

Calificación de los riesgos en una escala de cuatro puntos (alto, sustancial, moderado y bajo), de acuerdo con la probabilidad de que ocurran y la magnitud de los efectos negativos.

## **F. Condiciones y cláusulas del préstamo o crédito**

### **41. Condiciones para la entrada en vigor del préstamo:**

- a) la constitución de la UEP y la designación del jefe de proyecto, de conformidad con el párrafo A.1 a) de la sección I del anexo 2 del Convenio de Préstamo;

- b) adopción por parte de la prestataria del manual operativo, de conformidad con el párrafo B.1 de la sección I del anexo 2 del Convenio de Préstamo.

42. *Obligaciones clave:*

- c) La prestataria establecerá y mantendrá hasta la finalización del proyecto la UEP, que estará encabezada por un jefe de proyecto idóneo y con experiencia<sup>2</sup>, que responderá directamente al Director General de la prestataria, y será responsable de la ejecución, gestión, coordinación y supervisión diarias del proyecto, y proporcionará asistencia técnica al Comité Directivo establecido conforme al Convenio 171. Durante toda la ejecución del proyecto, se asignará una cantidad adecuada de personal idóneo y con experiencia para la UEP, y se le proporcionarán los demás recursos y fondos que resulten necesarios para lograr sus objetivos.
- d) La prestataria tomará los recaudos que resulten necesarios para cumplir con sus obligaciones conforme al Convenio 171.
- e) La prestataria adoptará un manual operativo (el “Manual operativo”) y lo aplicará de allí en adelante en la ejecución del proyecto, conforme a los términos y las condiciones aprobados por el Banco.
- f) A los efectos de la ejecución de las (posibles) obras para conducir los efluentes tratados desde la PTAR Salitre hasta el distrito de riego La Ramada, la prestataria llevará a cabo los estudios técnicos, financieros, económicos, sociales y ambientales adicionales necesarios, conforme a términos de referencia que sean aceptables para el Banco; demostrará, en forma que al Banco le resulte satisfactoria, la viabilidad de las obras propuestas, y adoptará y aplicará en la ejecución de dicha parte del proyecto las medidas y los planes ambientales y sociales necesarios, de acuerdo con las disposiciones de las políticas de salvaguardia del Banco.
- g) La prestataria i) ejecutará el proyecto de acuerdo con las disposiciones del PGA y el PAR, según corresponda, y ii) no modificará, derogará, aplazará ni incumplirá las disposiciones del PGA ni del PAR, ni otras disposiciones, ni renunciará a ellas, sin el consentimiento previo por escrito del Banco.
- h) Salvo en la medida en que el Banco convenga lo contrario, la prestataria se compromete a que los fondos depositados en la cuenta de capital del FIAB se utilicen como parte del aporte local de la prestataria para el financiamiento y la ejecución del proyecto. A tal fin, la prestataria no derogará, modificará, cederá, revocará, aplazará, anulará ni incumplirá el Acuerdo 28, de 2005, ni el Acuerdo 15, de 2007, ni sus disposiciones, ni renunciará a ellos, si, a juicio del Banco, tales acciones afectaran la capacidad de la prestataria de cumplir con sus obligaciones conforme a este acuerdo.
- i) La prestataria también se compromete a aplicar los procedimientos de adquisiciones del Banco mencionados en la sección III, anexo 2 del Convenio de Préstamo al utilizar todos los aportes locales necesarios para el financiamiento y la ejecución del proyecto, a excepción de los costos relacionados con la adquisición de tierras, el reasentamiento y la rehabilitación conforme al PAR.

---

<sup>2</sup> La CAR se refiere a esta unidad como la UEP-FIAB en el Manual operativo.

- j) La prestataria se cerciorará de que el proyecto se lleve a cabo de acuerdo con las disposiciones de las Normas contra la Corrupción.

#### **IV. RESUMEN DE LA EVALUACIÓN INICIAL**

##### **A. Análisis económico y financiero**

43. El proyecto generará importantes beneficios económicos a través de la mejora de la calidad del agua, la mejora de la salud pública, la reducción de los riesgos de inundaciones y la creación de un parque a lo largo del río con áreas multifuncionales que atravesarán toda el área metropolitana de Bogotá.

44. Conforme a las políticas nacionales, el Gobierno de Bogotá Distrito Capital debe recolectar y tratar las aguas residuales de acuerdo con los parámetros establecidos de calidad del agua. El equipo del Banco analizó la eficacia en función de los costos para determinar si el enfoque propuesto es la forma más económica de cumplir con los parámetros de calidad del agua de clase IV en el río Bogotá. Si los grandes interceptores de aguas residuales de la EAAB que se están construyendo se consideran como gastos no recuperables, el enfoque propuesto de dos plantas, Salitre y Canoas, es claramente la solución más eficaz en función de los costos. Incluso si no se consideran los gastos no recuperables, el análisis indica que el actual enfoque de dos plantas en Bogotá es una estrategia razonable y justificada para alcanzar los parámetros de calidad del agua de clase IV.

45. El Banco evaluó la viabilidad económica del proyecto y consideró que es económicamente viable, con beneficios netos de US\$249 millones en un período de 40 años y una tasa de rentabilidad interna de 16,9%. Los principales beneficios provienen de la disposición a pagar por la mejora del entorno del río Bogotá con una serie de parques multifuncionales, como también por la reducción de los daños causados por las inundaciones a lo largo del río. Se realizó un estudio de valoración contingente bien estructurado, en el cual se entrevistaron más de 1000 hogares para determinar si estaban dispuestos a pagar por las mejoras ambientales. La encuesta reveló un fuerte apoyo para la limpieza del río y su transformación en un activo ambiental urbano. La disposición promedio para pagar se calculó en alrededor de US\$3 por hogar por mes, lo cual generaría el 92% de los beneficios netos. Los aumentos previstos de las tarifas de aguas residuales necesarios para sostener la operación de la PTAR Salitre se calculan en alrededor de US\$1,5 por hogar por mes.

46. Se realizó un análisis de riesgo de Monte Carlo para examinar el impacto de la incertidumbre en las variables clave: costos, beneficios, tasas de descuento, tipos de cambio y demoras. La tasa de rentabilidad interna osciló entre el 10% y el 25%, lo cual indica la solidez de la viabilidad económica del proyecto. Aunque no se tuvieron en cuenta para el análisis, se prevé que, a medida que la conciencia ambiental y el desarrollo económico aumenten con el tiempo en Bogotá, sus residentes valorarán más los servicios ambientales ofrecidos por el río Bogotá.

47. También se realizó una evaluación rápida de los perjuicios económicos evitados gracias a la reducción de las inundaciones, y se generarán beneficios netos del orden del 7%. El proyecto reducirá el riesgo de inundaciones de diversas formas: i) mediante la reducción del riesgo de desbordamiento o colapso de los diques del río Bogotá; ii) a través de la reducción del

desbordamiento de los afluentes Tunjuelo y Fucha, debido al nivel de agua más bajo del río Bogotá, y iii) por medio de la facilitación del drenaje de aguas pluviales, debido al nivel de agua más bajo del río Bogotá. El análisis se basó en los mapas de inundaciones, la información histórica del costo de los daños por vivienda y los datos catastrales de Bogotá Distrito Capital.

48. Se realizó un análisis financiero exhaustivo para examinar la capacidad de la CAR de proporcionar el aporte local y reembolsar el préstamo al Banco Mundial. La CAR recibe la mayor parte de sus fondos de un impuesto ambiental específico, que representa el 15% de los impuestos prediales de cada ciudad dentro de su jurisdicción. En el caso de las ciudades grandes como Bogotá, las leyes nacionales exigen que los organismos ambientales regionales destinen, al menos, la mitad de los fondos proporcionados a inversiones ambientales en la ciudad. La CAR y el Gobierno de Bogotá Distrito Capital han acordado que la mitad de todos los fondos transferidos de Bogotá a la CAR (es decir, un valor equivalente al 7,5% de todos los impuestos prediales cobrados por el Distrito) se utilizará para financiar la infraestructura de tratamiento de aguas residuales, a través de una cuenta especial denominada “Fondo para las Inversiones Ambientales en el Perímetro Urbano de Bogotá” (FIAB). La CAR ha acumulado fondos desde la creación del FIAB. El análisis financiero demuestra que la CAR tiene fondos suficientes en el FIAB para proporcionar el aporte local para la ejecución del proyecto, y utilizar los recursos del FIAB para reembolsar el préstamo del Banco Mundial en un período de 15 años.

49. Se realizó un análisis financiero de la EAAB para garantizar la sostenibilidad de la PTAR Salitre. En la actualidad, la EAAB tiene una sólida posición financiera y recientemente recibió una calificación AAA de Duff & Phelps de Colombia, reconocida agencia de evaluación del riesgo crediticio. Las tarifas de agua y aguas residuales de Bogotá se encuentran entre las más altas de Colombia y América Latina. El análisis financiero indica que la EAAB debería aumentar las tarifas combinadas de agua y alcantarillado en alrededor de un 5% para cubrir los costos operativos de la planta Salitre.

## **B. Aspectos técnicos**

50. El proyecto está formulado dentro del POMCA, que exige lograr una calidad del agua de clase IV, adecuada para usos agrícolas, en la sección media del río Bogotá. Se realizó un extenso proceso de ejecución de modelos de calidad del agua a fin de determinar los posibles riesgos para el logro de la calidad del agua de clase IV. Se analizaron varias hipótesis con las siguientes variables: i) ejecución de los PSMV en los municipios; ii) actividades de control de la contaminación industrial; iii) diferentes niveles de tratamiento en la PTAR Salitre, y iv) diferentes niveles de tratamiento en la planta Canoas. Los resultados del proceso de formulación de modelos se presentan en la evaluación ambiental (EA). La conclusión general es que, en el marco del proyecto, es muy probable que se logren los parámetros de calidad del agua de clase IV en la sección media del río Bogotá; la calidad del agua en la sección aguas abajo del río Bogotá y el embalse del Muña seguirá siendo mala hasta que se alcancen niveles más altos de tratamiento en la planta Canoas en el futuro.

51. Los dos riesgos más importantes para el logro de los objetivos de calidad del agua son la contaminación proveniente del sistema de aguas pluviales de Bogotá y el tratamiento inadecuado de las aguas residuales en los municipios pequeños vecinos. Existe cierta incertidumbre acerca del logro de los parámetros bacteriológicos de clase IV, medidos a través de los coliformes. Los

niveles actuales de coliformes se reducirán radicalmente debido a la desinfección de los efluentes tratados de la planta Salitre y la conducción de las aguas residuales no tratadas en las otras zonas de captación hasta la planta Canoas. En el futuro, la principal fuente de coliformes será el sistema de aguas pluviales, que aún recibe cantidades considerables de aguas residuales. La EAAB tiene un programa permanente y a largo plazo para separar los sistemas de recolección de aguas residuales y de aguas pluviales que reducirá gradualmente los niveles de coliformes. Los resultados de los modelos de la EA también indican que, aunque el plan para aumentar el tratamiento de aguas residuales en los municipios no se ejecute de manera oportuna, los parámetros de calidad del agua de clase IV deberían alcanzarse en general en el marco del proyecto.

52. Durante el período de preparación, se realizó un estudio de nivel de prefactibilidad para la PTAR Salitre, a fin de calcular los costos y examinar las opciones tecnológicas. La CAR ha contratado una empresa internacional de consultoría para preparar un diseño preliminar y documentos de licitación para un contrato llave en mano para el diseño detallado, la construcción y la puesta en servicio de la ampliación y el mejoramiento de la planta Salitre. El equipo del Banco revisará los documentos de licitación para el contrato llave en mano, a fin de garantizar el uso de prácticas internacionales acertadas. Los desafíos técnicos clave incluyen el manejo de biosólidos, el proceso de desinfección y el control de olores, los cuales se analizarán durante la etapa de diseño preliminar. Se contratará una empresa internacional de consultoría para supervisar el contrato llave en mano para la planta Salitre, de modo de garantizar el examen integral del diseño detallado final y la construcción de la planta.

53. La EAAB preparó originalmente los estudios de factibilidad de las obras de control de inundaciones y luego los transfirió a la CAR. La CAR modificó el sistema de formulación del proyecto y elaboró los documentos de licitación para la construcción del primero de los dos tramos del río (tramos A y B), que abarca alrededor de 35 kilómetros de los 68 kilómetros de las obras del río. Los terraplenes para el control de inundaciones serán relativamente bajos, con una altura promedio de aproximadamente 5 metros, y brindarán protección contra inundaciones con un período de retorno de 100 años; cuando se consideran los márgenes de seguridad para el desagüe de seguridad, los diques ofrecen un nivel mucho más alto de protección. Los terraplenes se construirán con un núcleo de arcilla obtenida principalmente a través de la excavación del lecho del río.

54. Se han cerrado algunos de los meandros del río Bogotá para mejorar la capacidad hidráulica del río. Una vez que finalice la ampliación de la planta Salitre y se mejore la calidad del agua del río Bogotá, los meandros se reconectarán hidráulicamente con el río para ayudar a restaurar los humedales y proporcionar un parámetro de la capacidad de detención de inundaciones. El proyecto financiará un contrato de consultoría para preparar un plan integral de operación y mantenimiento de las obras del río, así como también para elaborar el diseño detallado de las áreas multifuncionales a lo largo del río.

### **C. Aspectos fiduciarios**

55. En el anexo 7, se documenta la evaluación de la gestión financiera de la CAR. El personal del Banco realizó la evaluación conforme a la OP/BP 10.02 (Gestión Financiera) y las Directrices para la Evaluación de los Mecanismos de Gestión Financiera en los Proyectos

Financiados por el Banco Mundial. La CAR no ha ejecutado proyectos financiados por el Banco anteriormente, pero tiene experiencia previa con una donación del BID. No obstante, aunque el monto del préstamo propuesto es relativamente alto, la ejecución del proyecto se concentra en una sola entidad (la CAR) y en actividades específicas con mecanismos simples de flujo de fondos. Debido a estos factores, el riesgo financiero inherente y mitigado se considera moderado. Las medidas pendientes acordadas son a) enviar la versión final del Manual operativo del proyecto, que debe incluir una sección específica sobre la gestión financiera aceptable para el Banco, y b) una vez disponible, enviar al Banco el informe de auditoría de la CAR emitido por la CGR sobre los estados financieros al 31 de diciembre de 2008 y 2009, y el plan de mejora acordado.

56. Las adquisiciones del proyecto propuesto se realizarían conforme a lo dispuesto en los documentos del Banco Mundial *Normas: Adquisiciones con préstamos del BIRF y créditos de la AIF*, de mayo de 2004, revisado en octubre de 2006 y mayo de 2010, y *Normas: Selección y contratación de consultores por prestatarios del Banco Mundial*, de mayo de 2004 y revisado en octubre de 2006 y mayo de 2010, y las disposiciones estipuladas en el convenio jurídico. La CAR tiene considerable experiencia en la adquisición y la gestión de obras, bienes y contratos de consultoría conforme a los procedimientos nacionales y del BID. Se realizó una evaluación de la capacidad para realizar adquisiciones, en la cual se calificó al riesgo general como moderado. La CAR contrató un consultor con experiencia en adquisiciones, y el personal correspondiente de la CAR recibió y continuará recibiendo capacitación sobre las directrices, los procedimientos y la documentación de adquisiciones del Banco. En el anexo 8, se documenta la evaluación de adquisiciones de la CAR y se incluyen detalles sobre los mecanismos de adquisiciones.

#### **D. Aspectos sociales**

57. El proyecto tiene un alto nivel de apoyo del público en general. Una encuesta realizada recientemente en Bogotá (Bogotá Cómo Vamos 2008) indicó que cerca de la mitad de los habitantes de la ciudad considera que la contaminación del río Bogotá es un problema ambiental importante. Además, algunos grupos de ONG están trabajando para ayudar a proteger y mejorar el río Bogotá y los humedales adyacentes. La mejora de la calidad del agua, la reducción de los riesgos de inundaciones y la creación de áreas multifuncionales a lo largo del río ayudarán a mejorar la calidad ambiental para los residentes de Bogotá, especialmente para aquellos que viven en la ribera del río. El fuerte apoyo del público para el proyecto también se reafirmó mediante el estudio de la disposición a pagar, realizado como parte del análisis económico, en el cual se entrevistaron más de 1000 hogares.

58. La adquisición de tierras y el reasentamiento son los principales efectos sociales relacionados con el proyecto, los cuales, si se gestionan adecuadamente, podrían brindar importantes beneficios a la población afectada. La CAR elaboró un plan integral de gestión social para la adquisición de tierras y el reasentamiento<sup>3</sup>, que se utiliza como el PAR del proyecto. Este plan cumple con los requisitos de la OP 4.12 (Reasentamiento Involuntario) y se resume en el anexo 10. El plan social se publicó por primera vez a través del *Infoshop* del Banco

---

<sup>3</sup> El nombre completo en español es “Plan de Gestión Social para la Compra de Áreas y Derechos Adquiridos sobre los Terrenos que Requiere el Proyecto de Adecuación” (abril de 2010).

el 17 de diciembre de 2009 y en el sitio web de la CAR, el 9 de marzo de 2010. La versión final aprobada del PAR se publicó en el *Infoshop* y en el sitio web de la CAR en mayo de 2010.

59. La EAAB actualmente es la propietaria de las tierras donde se realizará la ampliación de la PTAR Salitre, por lo que no se requiere la adquisición de tierras para el componente 1. Para las extensas obras que han realizarse en el río en el marco del componente 2, se requiere la compra de tierras a lo largo del río, lo que requiere la puesta en práctica de la OP 4.12. Mediante la mejora de los diseños de ingeniería, la CAR ha hecho un importante esfuerzo tendiente a reducir el desplazamiento involuntario y la cantidad de propiedades afectadas. Según la propuesta original de la EAAB para las obras de control de inundaciones, más de 1000 parcelas se hubieran visto afectadas. Cuando la responsabilidad del proyecto se trasladó a la CAR, el diseño se examinó a fin de minimizar la adquisición de tierras, y se lo ha mejorado continuamente.

60. El proyecto afectará a un total de 211 parcelas de tierra a lo largo del río. De dichas parcelas, 47 pertenecen a otras instituciones gubernamentales, como el Gobierno de Bogotá Distrito Capital o la EAAB. Casi todas las parcelas privadas se ubican en áreas rurales y generalmente forman parte de grandes haciendas ganaderas. Las tierras y las estructuras se compensarán a través de los procedimientos habituales de adquisición de tierras y activos, definidos por el Instituto Geográfico Agustín Codazzi (Resolución 620, de 2008). El método de valoración será el valor de mercado para las tierras y el valor de sustitución para las estructuras, de acuerdo con las leyes de Colombia y de conformidad con la política del Banco. En la gran mayoría de los casos, solo será necesario adquirir un pequeño porcentaje de la superficie total de las haciendas (menos del 20%) para el proyecto. Se prevé que el impacto general del proyecto para los propietarios de tierras a lo largo del río será beneficioso, con la reducción de las inundaciones y el aumento del valor de las propiedades.

61. La comunidad El Porvenir, del municipio de Mosquera, es la única área en la que se requerirá el reasentamiento físico de hogares. Esta área se desarrolló ilegalmente en dos de las parcelas rurales que anteriormente eran de propiedad privada. Se realizó un censo detallado para identificar las características socioeconómicas de las unidades sociales afectadas. Alrededor de 188 unidades sociales se verán afectadas, incluidos residentes y no residentes, arrendatarios y empresas. La mayoría de estas familias de El Porvenir son relativamente pobres, y muchas de ellas no tienen un título de propiedad válido. En El Porvenir, hay 45 pequeñas empresas y 25 familias que se dedican a reciclar residuos. Entre las alternativas de reasentamiento contempladas en el Plan de Gestión Social para la Adquisición de Tierras y el Reasentamiento para estas familias, se incluyen las siguientes: i) la adquisición de una vivienda ya existente en el mercado o ii) una vivienda proporcionada a través de una solución colectiva provista por el municipio de Mosquera en asociación con la CAR. En ambos casos, las familias desplazadas recibirán el título de propiedad legal de sus nuevas viviendas. En el plan también se incluyen actividades sociales y económicas específicas para ayudar a las familias a mejorar su situación.

## **E. Aspectos ambientales**

62. El proyecto está clasificado como de categoría A debido a la ampliación en gran escala de la planta Salitre y a las obras de construcción para el control de las inundaciones, las cuales

presentan beneficios, riesgos e impactos ambientales durante las etapas de construcción y de operación del proyecto. La prestataria elaboró una EA completa, de tres volúmenes, que cumple con los requisitos de la OP 4.01 (Evaluación Ambiental). La EA fue sometida a consultas públicas patrocinadas por la CAR (5 de marzo de 2009 y 16 de septiembre de 2009), y un grupo de expertos independientes la examinó y consideró aceptable para el Banco.

63. El volumen I de la EA aborda los objetivos de planificación estratégica y control de calidad del agua para la cuenca, y describe las condiciones de referencia, las tendencias y las alternativas estratégicas. El volumen II aborda los beneficios, los riesgos y los impactos específicos relacionados con la inversión propuesta en el marco de todos los componentes del proyecto. Incluye datos de referencia, tendencias y condiciones en lugares específicos y evalúa los impactos y riesgos probables mediante el uso de metodologías sistemáticas. El volumen III es un PGA detallado que describe las responsabilidades institucionales, el alcance de la labor durante la ejecución y los recursos presupuestarios asignados.

64. Los impactos ambientales clave que deberán mitigarse en la planta Salitre incluyen los impactos habituales relacionados con la construcción en gran escala de obras civiles, por ejemplo, control del polvo y del ruido, etapas de la construcción, gestión de residuos, tráfico y seguridad pública, entre otras cuestiones. Durante la operación de la planta Salitre, los principales riesgos ambientales están relacionados con el control de olores, los posibles obstáculos visuales y la estética, el manejo de biosólidos y el riesgo de accidentes industriales. El PGA incluye medidas específicas para manejar los hallazgos arqueológicos fortuitos, dado el amplio historial de asentamientos humanos a lo largo del río.

65. Durante la etapa operativa, los efluentes tratados de la planta Salitre se descargarán directamente en el río Bogotá, y los estudios de modelos indican que se logrará el parámetro objetivo de calidad del agua (clase IV) en el río Bogotá. Potencialmente, una parte de las aguas residuales tratadas se enviarán al distrito de riego La Ramada, ubicado a unos 3 kilómetros aguas arriba de la planta Salitre. Durante la ejecución del proyecto, se realizarán nuevos estudios sobre la factibilidad y los parámetros de uso del agua recuperada para riego, a fin de garantizar que se logre y se mantenga el principal objetivo de desarrollo del proyecto de recuperación ambiental del río Bogotá.

66. El agua recuperada solamente podría usarse para La Ramada una vez que se terminen las obras de mejoramiento y ampliación de la planta Salitre. Además, la capacidad de la planta Salitre mejorada para cumplir con los parámetros de calidad de efluentes para riego debería confirmarse mediante resultados operativos aceptables de la planta. La CAR acordó llevar a cabo los estudios técnicos, financieros, económicos, sociales y ambientales adicionales necesarios, conforme a términos de referencia que sean aceptables para el Banco; demostrar, en forma que al Banco le resulte satisfactoria, la viabilidad de las obras propuestas, y adoptar y aplicar en la ejecución de dicha parte del proyecto las medidas y los planes ambientales y sociales necesarios de acuerdo con las disposiciones de las políticas de salvaguardia del Banco.

67. Los principales impactos ambientales asociados con las obras del río en el marco del componente 2 están relacionados con las excavaciones en gran escala e incluyen los impactos habituales de la construcción, como el control del polvo y del ruido, el acceso a las zonas de

construcción y los impactos visuales. La OP 4.04 (Hábitats Naturales) se activa porque uno de los objetivos clave del proyecto es ayudar a restaurar el hábitat ribereño a lo largo del río, con especial énfasis en los importantes humedales que quedan en el área de influencia del proyecto. El proyecto no perjudicará los pocos humedales restantes ni otros hábitats naturales a lo largo del río, como el humedal de Juan Amarillo, ubicado al lado de la planta Salitre, sino que se concentra en la recuperación y la protección de estos valiosos recursos. La OP 4.09 (Control de Plagas) se activa debido a las inquietudes relacionadas con la posible exposición a las alimañas que viven en las áreas de construcción del dique. La CAR ha elaborado medidas específicas de orientación técnica acerca del uso, la gestión y el manejo de plaguicidas u otros mecanismos para el control de plagas en el área afectada por el proyecto. La OP 4.11 (Recursos Culturales Físicos) se activó para tener en cuenta los hallazgos fortuitos de importancia cultural o arqueológica durante la construcción de las obras civiles del proyecto.

68. La CAR realizó consultas públicas para permitir la participación de las partes interesadas y recibir los comentarios del público sobre la EA. Los comentarios recibidos durante el proceso de examen público se incorporaron en la versión final de la EA. El PGA del proyecto incluye medidas específicas para un futuro marco de comunicaciones estratégicas, que definirá las consultas y la difusión de la información durante la vigencia del proyecto. La EA preliminar se publicó en el sitio web de la CAR y en el *Infoshop* del Banco en agosto de 2009, y el resumen de la EA se envió al Directorio del Banco Mundial el 9 de septiembre de 2009. La versión final de la EA se publicó en el *Infoshop* el 18 de enero de 2010 y en el sitio web de la CAR, en enero de 2010.

## F. Políticas de salvaguardia

| <b>Políticas de salvaguardia aplicables al proyecto</b>            | <b>Sí</b> | <b>No</b> |
|--------------------------------------------------------------------|-----------|-----------|
| Evaluación Ambiental (OP/BP 4.01)                                  | [x]       | [ ]       |
| Hábitats Naturales (OP/BP 4.04)                                    | [x]       | [ ]       |
| Control de Plagas (OP 4.09)                                        | [x]       | [ ]       |
| Recursos Culturales Físicos (OP/BP 4.11)                           | [x]       | [ ]       |
| Reasentamiento Involuntario (OP/BP 4.12)                           | [x]       | [ ]       |
| Pueblos Indígenas (OP/BP 4.10)                                     | [ ]       | [x]       |
| Bosques (OP/BP 4.36)                                               | [ ]       | [x]       |
| Seguridad de las Presas (OP/BP 4.37)                               | [ ]       | [x]       |
| Proyectos en Zonas en Disputas (OP/BP 7.60)*                       | [ ]       | [x]       |
| Proyectos relativos a Cursos de Aguas Internacionales (OP/BP 7.50) | [ ]       | [x]       |

## G. Excepciones en materia de políticas y condiciones de preparación

69. El proyecto no requiere ninguna excepción de las políticas. Se elaboraron los documentos de licitación para los contratos del primer año relacionados con las obras que se ejecutarán en el río en el marco del componente 2, que representan alrededor del 10% de los costos generales del proyecto. Una empresa internacional de consultoría está elaborando los documentos de licitación

\* Al prestar apoyo al proyecto propuesto, el Banco no pretende menoscabar la determinación definitiva de las reclamaciones de las partes sobre las zonas en disputa.

para la PTAR Salitre, los cuales se prevé que estarán prácticamente terminados para diciembre de 2010; el inicio del proceso real de adquisiciones está previsto para poco después de la entrada en vigor del préstamo.

**Anexo 1: Antecedentes del país y del sector**  
**COLOMBIA: Proyecto de Adecuación Hidráulica y Recuperación Ambiental del**  
**Río Bogotá**

1. *Panorama general del sector de abastecimiento de agua y saneamiento.* Durante la última década, Colombia ha dado importantes pasos tendientes a mejorar los servicios de abastecimiento de agua y saneamiento. Según las directrices de las Naciones Unidas, en 2008, Colombia tuvo una mejora de los servicios de abastecimiento de agua y saneamiento del 92% y del 74%, respectivamente, cifras similares al promedio regional del 93% para abastecimiento de agua y 79% para saneamiento<sup>4</sup>. La cobertura urbana es prácticamente universal en Colombia, con porcentajes del 98% para abastecimiento de agua y del 81% para saneamiento; sin embargo, la cobertura en las áreas rurales está rezagada (73% para abastecimiento de agua y 55% para saneamiento)<sup>1</sup>.

2. En cuanto a la calidad del servicio de agua, la duración promedio del servicio diario de agua aumentó de 15,4 horas en 1993 a 23,7 horas en 2008 a nivel nacional<sup>5</sup>. Las cuatro ciudades principales del país tienen servicio de agua durante las 24 horas el 99% del tiempo, pero las ciudades pequeñas y las áreas rurales con frecuencia sufren racionamiento del agua<sup>6</sup>. Además, el promedio nacional de agua no facturada representa aproximadamente el 45% del volumen total producido, y en algunas ciudades este valor es superior al 60%<sup>3</sup>. En 2006, la SSPD informó que solo 19 millones de personas (el 40% de la población total), ubicadas principalmente en las 10 ciudades más importantes del país, recibían agua potable<sup>3</sup>. Por otra parte, en la mayoría de los municipios con menos de 20 000 habitantes, la calidad del agua no cumple con los parámetros de agua potable<sup>3</sup>.

3. A pesar de las mejoras en el tratamiento de aguas residuales en algunos municipios, la cobertura es relativamente baja: solo el 29% de las aguas residuales recibió algún tipo de tratamiento en 2007<sup>3</sup>. El 71% restante se vertió sin tratar y contaminó una parte considerable de los recursos hídricos de Colombia. Según un estudio realizado por la Universidad de Los Andes, las áreas urbanas de Colombia vierten alrededor de 67 metros cúbicos/segundo de aguas residuales no tratadas en las masas de agua<sup>7</sup>. El área metropolitana de Bogotá es la que más vierte y representa más del 15% de las descargas totales de aguas residuales urbanas, seguida de Antioquia, con el 13%, y Valle del Cauca con el 10%<sup>5</sup>. Todos los demás departamentos del país están por debajo del 5%<sup>5</sup>.

---

<sup>4</sup> Programa Conjunto de Vigilancia del Abastecimiento de Agua y el Saneamiento de la OMS y el Unicef; Colombia: Estimaciones sobre la mejora de la cobertura de los servicios de abastecimiento de agua (1980-2008) y Colombia: Estimaciones sobre la mejora de la cobertura de los servicios de saneamiento (1980-2008), actualizados en marzo de 2010.

<sup>5</sup> Arboleda, Luis Fernando, *Breve descripción del sector acueducto y alcantarillado en Colombia*, 2006, y SSPD, *Informe anual de servicios públicos de Colombia*, junio de 2009

<sup>6</sup> SSPD, *Políticas colombianas para el agua potable y saneamiento: Experiencia, logros y retos*, septiembre de 2008.

<sup>7</sup> Universidad de los Andes, *Bases para la formulación de un Plan Nacional de Aguas Residuales*, 2002.

4. Las condiciones de las más de 1000 cuerpos de agua han sufrido las consecuencias de la descarga de aguas residuales sin tratar, lo que ha generado condiciones anóxicas en ríos como el Bogotá, el Medellín, el Cali y el Sogamoso, y eutroficación en lagos y humedales. La contaminación de los recursos hídricos naturales reduce las opciones para el consumo humano, aumenta el riesgo de enfermedades infecciosas y deteriora las aguas subterráneas y otros ecosistemas locales. En la actualidad, las ciudades grandes como Bogotá, Medellín, Cali y Cartagena están poniendo en marcha programas de tratamiento de aguas residuales. Si bien Colombia tiene actualmente 410 PTAR en 354 municipios (el 32% de los municipios del país), solamente alrededor del 33% de esas PTAR funcionan de forma eficiente y conforme a las normas ambientales<sup>8</sup>.

5. En este contexto, desde mediados de la década de 1990, el Gobierno de Colombia en los ámbitos nacional, regional y local ha trabajado para mejorar los servicios, especialmente en las ciudades pequeñas y las áreas rurales, que son las más necesitadas. Se han adoptado enfoques innovadores, como los siguientes: i) la introducción de organismos reguladores autónomos en materia de economía y servicios; ii) el desarrollo de estratos socioeconómicos como base para las tarifas diferenciadas desde el punto de vista espacial; iii) la incorporación de un marco legal para facilitar la participación del sector privado, y iv) la reciente creación de los planes departamentales de agua y saneamiento, a fin de mejorar la cobertura y la calidad de los servicios en Colombia.

6. El Gobierno de Colombia ha elaborado políticas e instrumentos para mejorar las condiciones de los recursos hídricos concentrándose en el tratamiento de las aguas residuales para alcanzar los objetivos de calidad del agua basados en usos beneficiosos. En 2006, el MAVDT creó el Plan Nacional de Manejo de Aguas Residuales Municipales (PMAR)<sup>9</sup>. En las secciones siguientes de este anexo, se analizan algunos de los principales proyectos, instrumentos y políticas utilizados por los Gobiernos nacional, regionales y locales para mejorar la cobertura del tratamiento de aguas residuales.

7. ***Instituciones clave.*** En el ámbito nacional, el MAVDT es el organismo clave responsable de las políticas del sector de abastecimiento de agua y saneamiento. Dentro del MAVDT, el Viceministerio de Agua supervisa el sector, formula las políticas y planifica el desarrollo del sector. El DNP es responsable de elaborar y hacer el seguimiento de políticas, planes, programas, estudios y proyectos de inversión para los sectores de abastecimiento de agua y saneamiento. La CRA promueve la competencia entre los proveedores de servicios, controla los monopolios, define las metodologías de fijación de tarifas basadas en fórmulas estándares y planes de inversión presentados por los proveedores de servicios, y establece las normas técnicas y de calidad de servicios que deben cumplir los proveedores de servicios. La SSPD es responsable de hacer el seguimiento y supervisar la idoneidad y la eficiencia de los servicios públicos, establecer sistemas contables uniformes, supervisar la administración de subsidios y hacer el seguimiento de la administración general de las empresas de servicios públicos.

8. En el ámbito regional, las corporaciones autónomas regionales y las autoridades ambientales urbanas (en las ciudades más importantes) son responsables de ejecutar las políticas,

---

<sup>8</sup> MAVDT, Plan Nacional de Manejo de Aguas Residuales (PMAR), 2006.

<sup>9</sup> MAVDT, Plan Nacional de Manejo de Aguas Residuales (PMAR), 2006.

los planes y los programas nacionales sobre asuntos ambientales; se desempeñan como autoridades ambientales en sus áreas de jurisdicción y otorgan concesiones, permisos, autorizaciones y licencias. Además, los departamentos participan en el proceso de planificación y proporcionan asistencia técnica, financiera y administrativa a municipios y proveedores de servicios públicos, principalmente a través del programa de Planes Departamentales de Agua, en coordinación con el MAVDT.

9. En el ámbito local, los municipios son responsables de garantizar el servicio adecuado de agua y saneamiento para la población, y los proveedores de servicios públicos administran, operan y mantienen dicho servicio.

10. ***Descentralización de los asuntos ambientales y del agua.*** Colombia tiene un marco descentralizado para la prestación de servicios públicos y la administración de recursos financieros. La prestación de los servicios de agua y saneamiento está considerablemente descentralizada desde la Ley de Descentralización de 1986, que transfirió la responsabilidad de la operación y la gestión de los sistemas de agua y alcantarillado a los municipios. Según la base de datos de la SSPD, hay 1975 proveedores registrados de servicios de abastecimiento de agua y saneamiento, de los cuales 375 operadores atienden a más de 2500 clientes y 1601 operadores atienden a mercados por debajo de ese nivel<sup>10</sup>. Si bien la mayoría de los proveedores de servicios son públicos, en 2008, existían 239 empresas de agua privadas y 60 empresas mixtas de agua en todo el país<sup>6</sup>.

11. En el sector ambiental, la Ley 99 (1993) creó un sistema nacional ambiental descentralizado, compuesto por 33 CAR y 6 autoridades ambientales urbanas en las ciudades con más de 1 millón de habitantes. La ley define las CAR como entes corporativos de carácter público dotados de autonomía fiscal y administrativa e integrados por territorios que constituyen un mismo ecosistema o comparten características hidrológicas, geopolíticas o de otro tipo. Su función general es gestionar los recursos naturales de sus territorios y promover el desarrollo sostenible de acuerdo con las políticas que establece el MAVDT. En consonancia con el concepto básico de gestión descentralizada, la ley también proporciona a las CAR una serie de fuentes de ingresos independientes, que incluyen instrumentos económicos, impuestos, tasas, multas y fondos ambientales. La fuente más importante para la gestión ambiental proviene de un porcentaje fijo de los impuestos prediales recaudados por los Gobiernos municipales.

12. Las CAR reciben entre el 15% y el 26% de los impuestos prediales municipales para financiar sus actividades de gestión ambiental. En el caso de las CAR de áreas urbanas con más de 1 millón de habitantes, la mitad de los ingresos provenientes de los impuestos prediales debe destinarse a inversiones ambientales dentro de la zona urbana. Las CAR también pueden aumentar sus propios ingresos mediante lo siguiente: i) instrumentos económicos, incluidas tasas retributivas cobradas a todas las fuentes de contaminación del aire, el agua o el suelo; ii) tasas compensatorias cobradas a los usuarios de recursos naturales para ayudar a abonar los gastos necesarios para mantener tales recursos, y iii) cargos sobre todos los usos del agua. Además, las

---

<sup>10</sup> SSPD, *Informe anual de servicios públicos de Colombia*, junio de 2009.

empresas generadoras de electricidad pagan a las CAR un impuesto bruto sobre las ventas de electricidad<sup>11</sup>.

13. **Estrategias e instrumentos de políticas.** Las entidades públicas han elaborado estrategias e instrumentos, incluidos documentos de políticas, reglamentaciones y planes de acción, para mejorar el manejo adecuado de las aguas residuales y reducir la contaminación.

14. El PMAR, creado en 2006, sirve de marco para los programas de manejo de aguas residuales en las grandes áreas urbanas. Este plan nacional promueve el manejo coordinado de las aguas residuales a nivel local, regional y nacional, concentrándose en el fortalecimiento institucional y la aplicación de los actuales instrumentos de planificación. Además, fomenta la construcción de sistemas de tratamiento de aguas residuales en los municipios con servicios adecuados de agua y alcantarillado y cuencas hidrográficas prioritarias de alto impacto, incluidos los ríos Bogotá, Chicamocha, Medellín y Cauca. Como resultado, actualmente en todas las grandes ciudades de Colombia se están poniendo en marcha importantes programas de inversiones para abordar los problemas de contaminación del agua.

15. Antes de la constitución del MAVDT, el Ministerio de Agricultura promulgó la primera reglamentación sobre calidad del agua basada en los distintos usos del agua mediante el Decreto 1594 (1984), que especifica los límites máximos permitidos para la descarga de efluentes de aguas residuales en masas de agua o sistemas de recolección de aguas de alcantarillado basados en el porcentaje de eliminación de los componentes habituales de las aguas residuales domésticas, incluidos DBO, SST, grasas y aceites. Actualmente se está revisando este decreto para establecer límites basados en las concentraciones, considerar la capacidad de asimilación de las aguas receptoras y elaborar un plan razonable de ejecución para la construcción de la PTAR. Las autoridades ambientales, como la CAR en Cundinamarca y el MAVDT, también tienen la facultad de establecer requisitos de descarga más estrictos a fin de alcanzar los objetivos específicos de calidad del agua.

16. El PSMV exige que los proveedores de servicios indiquen programas, proyectos y actividades que sigan un programa de ejecución y un plan de inversión tendientes a reducir las cargas de contaminación en las aguas receptoras y mejorar la recolección y eliminación de aguas residuales en los sistemas de alcantarillado municipales. Los planes de acción del PSMV están alineados con otros instrumentos de planificación, por ejemplo, los objetivos de calidad del agua definidos por las autoridades ambientales, y los planes maestros y de inversión establecidos por los municipios. Los PSMV son preparados por los proveedores de servicios y aprobados por las autoridades ambientales.

17. La coordinación del manejo de aguas residuales con los instrumentos y programas regionales de planificación es otra estrategia mencionada en el PMAR. Las autoridades ambientales tienen planes a largo, mediano y corto plazo. Cada autoridad ambiental regional elabora el borrador de un plan de acción de 10 años (Plan de Gestión Ambiental Regional), que se coordina con el Plan Nacional de Desarrollo. Además, el director general de cada autoridad ambiental regional debe elaborar el borrador de un plan de acción de cuatro años (Plan de Acción Cuatrienal) para su mandato de cuatro años y planes operativos anuales de inversiones para cada

---

<sup>11</sup> Resources for the Future, *Institutional Analysis of Colombia's Autonomous Regional Corporations (CARs)*, 2004.

año del mandato. Las autoridades ambientales regionales también deben elaborar los documentos de los POMCA para definir el uso de la tierra, los usos del agua y los criterios de calidad del agua correspondientes.

18. El PMAR también recomienda que los instrumentos de planificación en el ámbito municipal, como los planes de desarrollo municipales y los planes de ordenamiento territorial (POT), incluyan acciones concretas para reducir la contaminación de las aguas residuales.

### **Estrategia de gestión ambiental del río Bogotá**

19. **Río Bogotá.** El río Bogotá está ubicado en el departamento colombiano de Cundinamarca. Nace a una altura de 3400 metros en el municipio de Villapinzón y recorre 370 kilómetros antes de unirse con el río Magdalena, a una altura de 280 metros, en el municipio de Girardot. La cuenca cubre 6000 kilómetros cuadrados y se divide en tres partes en relación con la ciudad de Bogotá: i) la cuenca superior, al norte de Bogotá; ii) la cuenca media, en el área metropolitana de Bogotá, y iii) la cuenca inferior, al sur de Bogotá. El río Bogotá es fundamental para el Departamento de Cundinamarca, ya que es una fuente de agua potable en la cuenca superior y se utiliza para diversos usos, como actividades agrícolas y ganaderas y generación de electricidad. La cuenca hidrográfica del río Bogotá incluye 45 municipios y Bogotá Distrito Capital, por lo que las autoridades ambientales son la CAR y la SDA de Bogotá.

20. Uno de los principales problemas que enfrenta el río Bogotá es el ingreso de aguas residuales no tratadas en la cuenca media del río. En esta sección, la ciudad de Bogotá, con una población de alrededor de 8 millones de habitantes, vierte todas sus aguas residuales en el río a través de los tres afluentes principales: Salitre, Fucha y Tunjuelo. El caudal promedio en la estación seca antes de ingresar a la ciudad es de 12 metros cúbicos/segundo, y Bogotá vierte 22 metros cúbicos/segundo adicionales de aguas residuales, de las cuales solo el 20% recibe tratamiento primario en la PTAR Salitre, ubicada al norte de la ciudad. Como consecuencia, el río está muy contaminado, no contiene oxígeno disuelto y presenta niveles altos de DBO, SST y coliformes fecales. Desde 1950, el rápido desarrollo urbano no solo ha producido el deterioro de la calidad del agua del río, sino también la canalización del río, la destrucción de los humedales y el crecimiento de comunidades de ingreso bajo a lo largo del río que son propensas a las inundaciones.

21. Al salir de Bogotá, el río desciende abruptamente 2000 metros en un corto trecho hasta llegar al valle del río Magdalena. Emgesa construyó una central de energía hidroeléctrica (1124 megavatios de capacidad instalada en dos trenes) aguas abajo de Bogotá para aprovechar el caudal y el desnivel del río. La presa de la central de energía de Emgesa es el embalse del Muña, de 853 hectáreas, que también está muy contaminado. Las espectaculares cataratas de Tequendama se encuentran aguas abajo de Bogotá.

22. **Instituciones clave.** La CAR es la autoridad ambiental regional a cargo de la cuenca del río Bogotá. Está gobernada por una asamblea corporativa, un consejo directivo y un director general. El Consejo Directivo es la autoridad administrativa de la CAR e incluye a las siguientes autoridades: i) el Gobernador de cada departamento representado en la CAR (o sus delegados); ii) un representante del Presidente de la República; iii) un representante del MAVDT; iv) hasta cuatro alcaldes elegidos por la Asamblea Corporativa; v) dos representantes del sector privado;

vi) un representante de las comunidades indígenas o de origen africano, y vii) dos representantes de ONG ambientales locales. El Director General es la autoridad ejecutiva de la CAR y es elegido por el Consejo Directivo. Su mandato dura cinco años. La CAR tiene autonomía financiera y recibe el 15% de los ingresos resultantes del impuesto predial de los municipios de su jurisdicción. La CAR posee y administra distintos tipos de activos, como parques e infraestructura hidráulica, brinda orientación para las iniciativas de planificación regional y establece los parámetros de calidad del agua.

23. Bogotá Distrito Capital es la entidad territorial que aporta el nivel más alto de contaminación orgánica al río Bogotá. En consonancia con los instrumentos y las estrategias de planificación del manejo de aguas residuales, dicho distrito ha incluido medidas concretas para reducir la contaminación en el POT y en el Plan de Desarrollo. La capital también es propietaria de la EAAB, empresa que presta los servicios de agua y alcantarillado en la ciudad.

24. En su calidad de autoridad ambiental del distrito, la SDA formula las políticas ambientales y reglamenta su ejecución. Tiene autonomía administrativa y financiera. La SDA y la EAAB son las representantes del distrito en las conversaciones interinstitucionales relacionadas con las cuestiones ambientales del río Bogotá.

25. Existen 45 municipios pequeños en la cuenca del río Bogotá, de los cuales dos, Mosquera y Soacha, están ubicados en la cuenca media, adyacente a la ciudad de Bogotá, 28 municipios se encuentran en la cuenca superior, al norte de Bogotá, y 16 municipios están en la cuenca inferior.

26. **Estrategia inicial para el río Bogotá.** A comienzos de la década de 1990, el Gobierno del Distrito puso en marcha un programa que preveía la construcción de tres plantas medianas de tratamiento secundario de aguas residuales, una para cada una de las tres microcuencas de Bogotá. El plan preveía la construcción de cada planta en dos etapas: una primera etapa de tratamiento primario con tasas de eliminación de SST del 60% y de DBO del 40%, y una segunda etapa de tratamiento secundario para producir una calidad de efluentes de 30 miligramos/litro de DBO y SST. En 1994, la ciudad celebró un contrato de concesión de COT con un consorcio internacional para una PTAR primaria de 4 metros cúbicos/segundo denominada “Salitre”, ubicada en el norte de Bogotá. La planta inició las operaciones en el año 2000 y, en diciembre de 2003, el Distrito canceló el contrato, compró la planta al consorcio y transfirió las operaciones a la EAAB.

27. En 2004, el Tribunal del Departamento de Cundinamarca determinó que las partes involucradas (Emgesa, EAAB, CAR, el Distrito y la Nación) no habían cumplido con sus responsabilidades de abordar los problemas de contaminación del agua del río Bogotá y exigió que todas las partes elaboraran un plan de acción. El Tribunal se reservó el derecho de obligar a las partes a tomar una decisión si no lograban avanzar de manera adecuada. Por lo tanto, el programa general está sometido a revisión judicial permanente, y las partes presentan informes periódicos ante el Tribunal.

28. **Estrategia actual.** En diciembre de 2004, el DNP elaboró un documento de planificación estratégica para la gestión ambiental del río Bogotá (CONPES 3320). El plan de acción incluye: i) optimización y construcción de nuevos sistemas de tratamiento de aguas residuales en los municipios pequeños; ii) mejoramiento y ampliación de la PTAR Salitre a una capacidad de

alrededor de 8 metros cúbicos/segundo; iii) construcción de interceptores grandes; iv) construcción de una planta grande (14 metros cúbicos/segundo) aguas abajo de Bogotá, denominada “Canoas”; v) mejora de las condiciones ambientales en el embalse del Muña, y vi) obras para el control de inundaciones y gestión ambiental para restaurar los hábitats ribereños. El documento del DNP se basó, en parte, en un estudio realizado por la EAAB en 2003, en el cual se llegó a la conclusión de que un enfoque de dos plantas era la mejor alternativa para la estrategia de la cuenca media. La PTAR Salitre tratará las aguas residuales provenientes del norte de Bogotá, proporcionará aguas tratadas para mantener el río Bogotá y complementará el abastecimiento de agua para el vecino distrito de riego La Ramada. Las aguas residuales de las otras dos microcuencas (Fucha y Tunjuelo) se recolectarán y se enviarán aguas abajo hasta la planta Canoas. En la actualidad, la EAAB está construyendo los grandes interceptores que conducirán las aguas residuales hasta la planta Canoas.

**29. *Parámetros de calidad del agua.*** En 2006, la CAR publicó el POMCA. Sobre la base de este plan, la CAR ha publicado los parámetros de calidad del agua para la cuenca hidrográfica hasta el año 2020, en los cuales se designan los usos del agua en los distintos segmentos del río y se establecen criterios de calidad del agua ambiente de aproximadamente 25 contaminantes a fin de satisfacer los usos designados<sup>12</sup>. En el cuadro 1, se incluye un resumen de los parámetros de calidad del agua para el año 2020, con especial atención a los principales contaminantes. El objetivo del proyecto es lograr parámetros de calidad del agua de clase IV, adecuada para el uso agrícola, en la sección entre Puente La Virgen y Alicachín; esta sección actualmente está clasificada como clase VIII. En 2007, el MAVDT modificó la licencia ambiental otorgada para expandir la PTAR Salitre a una capacidad de 8 metros cúbicos/segundo, con requisitos de descarga de 30 miligramos/litro de DBO y SST. Los modelos de calidad del agua indicaron que este nivel de tratamiento sería suficiente para lograr la calidad de agua de clase IV en la cuenca media.

**Cuadro 1: Parámetros de calidad del agua del río Bogotá<sup>1</sup>**

| Contaminantes                  | Cuenca superior     |                          | Cuenca media               | Cuenca inferior     |                |
|--------------------------------|---------------------|--------------------------|----------------------------|---------------------|----------------|
|                                | Villapinzón-Tibitoc | Tibitoc-Puente La Virgen | Puente La Virgen-Alicachín | Alicachín-Río Apulo | Apulo-Girardot |
| DBO, mg/L                      | 7                   | 50                       | 50                         | 70                  | 50             |
| OD, mg/L                       | > 4                 | n.d.                     | n.d.                       | n.d.                | n.d.           |
| Coliformes totales, NMP/100 ml | 20 000              | 20 000                   | 20 000                     | n.d.                | 20 000         |
| SST, mg/L                      | 10                  | 40                       | 40                         | 50                  | 40             |

<sup>12</sup> Objetivos de calidad del agua para la cuenca de río Bogotá a lograr en el año 2020 (Acuerdo 43 de 2006).

|                               |                                                                                       |                          |                          |                                              |                          |
|-------------------------------|---------------------------------------------------------------------------------------|--------------------------|--------------------------|----------------------------------------------|--------------------------|
| Clasificación y uso designado | Clase II<br>Abastecimiento de agua potable con tratamiento convencional; uso agrícola | Clase IV<br>Uso agrícola | Clase IV<br>Uso agrícola | Clase V<br>Industria y generación de energía | Clase IV<br>Uso agrícola |
|-------------------------------|---------------------------------------------------------------------------------------|--------------------------|--------------------------|----------------------------------------------|--------------------------|

1. Valores máximos basados en condiciones de caudal promedio; los coliformes totales se basan en los usos restringidos agrícolas. Para los usos no restringidos, los coliformes totales no pueden superar los 5000 NMP/100 mililitros (NMP = Número más probable de coliformes).

30. En 2007, la CAR, la EAAB y el Distrito firmaron un acuerdo interinstitucional (Convenio 171) que requería que la CAR financiara la ampliación de la planta Salitre y la mejora de las obras del río en Bogotá. La CAR creó una cuenta especial para el programa de aguas residuales de Bogotá, denominada “Fondo para las Inversiones Ambientales en el Perímetro Urbano de Bogotá” (FIAB), que es una cuenta ad hoc financiada con la mitad de los ingresos resultantes del impuesto predial transferidos de Bogotá Distrito Capital a la CAR.

31. En el marco del Programa de Manejo de Aguas Residuales en Municipios Pequeños, la CAR planea mejorar y ampliar 22 PTAR ubicadas en la cuenca superior, construir 14 PTAR nuevas en diversos municipios, y construir instalaciones adicionales, como interceptores, estaciones de bombeo y desagües. Las PTAR estarán diseñadas para cumplir con los objetivos de calidad del agua de 2006.

32. A fin de controlar la contaminación industrial, los usuarios que viertan aguas residuales en las masas de agua deberán tener un permiso de descarga y un plan de ejecución para reducir la contaminación basado en los objetivos establecidos en el PSMV. La CAR está realizando una fuerte campaña para trabajar con las industrias y los productores a fin de legalizar las descargas de aguas residuales. En el Distrito, las descargas industriales son controladas y supervisadas por la SDA mediante un modelo similar. La CAR y el Distrito están promoviendo un programa de producción más limpia para reducir el consumo de agua, energía y materias primas en las industrias.

33. La compañía de abastecimiento de agua (la EAAB) ha puesto en marcha un programa integral para reducir las conexiones ilegales de aguas residuales (conexiones erradas) a los conductos de aguas pluviales. Este programa, que está incluido en el PSMV de la compañía de abastecimiento de agua, abarca la rehabilitación de las líneas de alcantarillado y mejoras de las conexiones, control y supervisión, y campañas públicas.

34. Además de mejorar la calidad del agua en el río Bogotá, la CAR tiene un ambicioso programa para recuperar el ecosistema del río y reducir el riesgo de inundaciones. Antes de 1950, en la cuenca media, el Bogotá era un río serpenteante con una amplia zona ribereña, extensas llanuras aluviales y un magnífico ecosistema. Desde entonces, el rápido desarrollo urbano ha producido el deterioro de la calidad del agua del río, la canalización del río, la destrucción de los humedales y el crecimiento de comunidades de ingreso bajo a lo largo del río que son propensas a las inundaciones. El Convenio 171, celebrado entre la CAR y la EAAB, también asignó a la CAR la responsabilidad de las obras de protección contra inundaciones en el

área metropolitana de Bogotá. Actualmente, la CAR está incorporando objetivos ambientales en el programa de obras de prevención de inundaciones mediante la ampliación y la protección de la zona ribereña, la restauración de los meandros del río y la conexión hidráulica del río con las llanuras aluviales. Al mismo tiempo, la SDA y la EAAB, que son responsables de los humedales ubicados dentro de la ciudad, tienen un programa activo para la mejora de los humedales a lo largo del río.

35. A mediados del siglo XIX, había un total estimado de 50 000 hectáreas de humedales conectados con el río Bogotá, mientras que, en 2009, había menos de 1000 hectáreas de humedales, gran parte de los cuales estaban degradados por la mala calidad del agua<sup>13</sup>. En Bogotá ha surgido un fuerte movimiento ambientalista que promueve activamente la protección y la expansión de los humedales. En 2006, el Gobierno de Bogotá Distrito Capital aprobó una política integral de gestión de humedales. En la actualidad, el Gobierno del Distrito, la EAAB y la CAR trabajan para proteger los humedales del río a través de reglamentaciones y programas de gestión ambiental.

---

<sup>13</sup> Garzón, A., J. A. Lara y L. J. Saavedra, “Treatment wetland use to restore protected wetlands in the city of Bogotá”.

**Anexo 2: Principales proyectos conexos financiados por el Banco u otras entidades**  
**COLOMBIA: Proyecto de Adecuación Hidráulica y Recuperación Ambiental del**  
**Río Bogotá**

| <b>Cuestión sectorial</b>             | <b>Proyecto</b>                                                                                                                                                                                                                                                                                                                                                                                                   | <b>Calificaciones de la última supervisión (Informe sobre la marcha del proyecto)</b><br>(solo proyectos financiados por el Banco) <sup>a</sup> |                               |
|---------------------------------------|-------------------------------------------------------------------------------------------------------------------------------------------------------------------------------------------------------------------------------------------------------------------------------------------------------------------------------------------------------------------------------------------------------------------|-------------------------------------------------------------------------------------------------------------------------------------------------|-------------------------------|
| <b>Financiada por el Banco</b>        |                                                                                                                                                                                                                                                                                                                                                                                                                   | <b>Avance en la ejecución</b>                                                                                                                   | <b>Objetivo de desarrollo</b> |
| Abastecimiento de agua y saneamiento  | 3952-CO/3953-CO: Proyecto de Rehabilitación del Servicio de Abastecimiento de Agua y Alcantarillado de Santa Fe I (cerrado)                                                                                                                                                                                                                                                                                       | S                                                                                                                                               | S                             |
| Abastecimiento de agua y saneamiento  | 4507-CO: Proyecto de Abastecimiento de Agua, Alcantarillado y Gestión Ambiental de Cartagena (cerrado)                                                                                                                                                                                                                                                                                                            | S                                                                                                                                               | S                             |
| Abastecimiento de agua y saneamiento  | 7077-CO: Proyecto de Asistencia para la Reforma del Sector del Agua                                                                                                                                                                                                                                                                                                                                               | S                                                                                                                                               | S                             |
| Abastecimiento de agua y saneamiento  | 7281-CO: Proyecto de Respaldo al Sector de Abastecimiento de Agua y Saneamiento                                                                                                                                                                                                                                                                                                                                   | S                                                                                                                                               | S                             |
| Abastecimiento de agua y saneamiento  | 74340-CO: Proyecto de Gestión de Infraestructura y Servicios de Abastecimiento de Agua y Saneamiento La Guajira (en curso)                                                                                                                                                                                                                                                                                        | I                                                                                                                                               | I                             |
| <b>Otros organismos de desarrollo</b> |                                                                                                                                                                                                                                                                                                                                                                                                                   |                                                                                                                                                 |                               |
| BID-AquaFund                          | CO-T1216: Mecanismo Financiero de Conservación de las Cuencas de Bogotá<br><br>Descripción: Generación de un mecanismo financiero para invertir en proyectos relacionados con la conservación de los ecosistemas y la gestión y la protección de las cuencas hidrográficas de Bogotá y de los municipios vecinos; donación de US\$350 000 ejecutada por la EAAB, aprobada el 31 de marzo de 2010.                 |                                                                                                                                                 |                               |
| BID                                   | CO-L1034: Programa de Saneamiento del Río Medellín. Segunda etapa<br><br>Descripción: El proyecto propuesto contempla la ejecución de obras como parte del Programa de Saneamiento del Río Medellín, incluida la construcción de la PTAR Bello, el interceptor norte del río Medellín y los empalmes entre los conectores y el interceptor norte; aprobado en febrero de 2009 con un préstamo de US\$450 millones |                                                                                                                                                 |                               |
| BID                                   | CO-L1028: Programa de Agua Potable y Saneamiento para el Municipio                                                                                                                                                                                                                                                                                                                                                |                                                                                                                                                 |                               |

|  |                                                                                                                                                                                       |
|--|---------------------------------------------------------------------------------------------------------------------------------------------------------------------------------------|
|  | <p>de Pasto</p> <p>Préstamo de US\$28,7 millones a la Empresa de Obra Sanitaria de Pasto, con garantía del Gobierno nacional y respaldo del MAVDT; aprobado en septiembre de 2009</p> |
|--|---------------------------------------------------------------------------------------------------------------------------------------------------------------------------------------|

### Anexo 3: Marco de resultados y seguimiento

#### COLOMBIA: Proyecto de Adecuación Hidráulica y Recuperación Ambiental del Río Bogotá

##### Marco de resultados

| Objetivo de desarrollo del proyecto                                                                                                                                                                                                                                                           | Indicadores de los efectos directos del proyecto                                                                                                                                                                                                                                                                                                                                                                                                                                                                                                                                                                                                            | Uso de la información sobre efectos directos del proyecto                                                                    |
|-----------------------------------------------------------------------------------------------------------------------------------------------------------------------------------------------------------------------------------------------------------------------------------------------|-------------------------------------------------------------------------------------------------------------------------------------------------------------------------------------------------------------------------------------------------------------------------------------------------------------------------------------------------------------------------------------------------------------------------------------------------------------------------------------------------------------------------------------------------------------------------------------------------------------------------------------------------------------|------------------------------------------------------------------------------------------------------------------------------|
| El objetivo del proyecto es ayudar a la prestataria a transformar el río Bogotá en un activo ambiental para la región metropolitana de Bogotá Distrito Capital mejorando la calidad del agua, reduciendo los riesgos de inundaciones y creando áreas multifuncionales a lo largo de dicho río | <ul style="list-style-type: none"> <li>• Una calidad del agua en la cuenca media del río Bogotá que cumpla con los parámetros de calidad del agua de clase IV para DBO (50 mg/l) y SST (40 mg/l)</li> <li>• Logro de un parámetro de protección de control de inundaciones para el río Bogotá para un período de retorno de 100 años (es decir, menos del 1% de probabilidades de desbordamiento por año)</li> <li>• La recuperación de ocho áreas multifuncionales a lo largo del río Bogotá con una superficie de aproximadamente 175 hectáreas y las siguientes características: zonas de inundaciones, hábitat ecológico y espacios públicos</li> </ul> | Seguimiento de la calidad y sostenibilidad de los servicios ambientales y de protección contra inundaciones en el río Bogotá |
| Efectos directos intermedios                                                                                                                                                                                                                                                                  | Indicadores de los efectos directos intermedios                                                                                                                                                                                                                                                                                                                                                                                                                                                                                                                                                                                                             | Finalidad del seguimiento de los resultados intermedios                                                                      |
| <b>1. PTAR Salitre</b><br><u>Objetivo:</u> Aumentar el caudal de diseño de la planta y la calidad de los efluentes de Salitre                                                                                                                                                                 | Ampliación del caudal de diseño de la PTAR de 4 m <sup>3</sup> /s a alrededor de 8 m <sup>3</sup> /s para lograr un parámetro de descarga de 30/30 mg/l DBO/SST                                                                                                                                                                                                                                                                                                                                                                                                                                                                                             | Seguimiento de la construcción y la operación de la PTAR Salitre                                                             |
| <b>2. Adecuación Hidráulica</b><br><u>Objetivo:</u> Reducir el riesgo de inundaciones a lo largo del río Bogotá                                                                                                                                                                               | Construcción de 68 km de obras de control de inundaciones en el área metropolitana de Bogotá                                                                                                                                                                                                                                                                                                                                                                                                                                                                                                                                                                | Seguimiento de la construcción de las obras de control de inundaciones                                                       |
| <b>3. Planificación hídrica y ambiental</b><br><u>Objetivo:</u> Mejorar la eficacia y la sostenibilidad de las principales                                                                                                                                                                    | <ul style="list-style-type: none"> <li>• Un plan hídrico integrado para la cuenca del río Bogotá que sirva como herramienta de planificación para respaldar el objetivo de desarrollo del proyecto en el mediano plazo</li> </ul>                                                                                                                                                                                                                                                                                                                                                                                                                           |                                                                                                                              |

|                                                        |                                                                                                                                                                                                                 |                                                                                    |
|--------------------------------------------------------|-----------------------------------------------------------------------------------------------------------------------------------------------------------------------------------------------------------------|------------------------------------------------------------------------------------|
| inversiones del proyecto a través de estudios técnicos | <ul style="list-style-type: none"> <li>• Un plan de gestión del río para los 68 km del río Bogotá en el marco del componente 2</li> <li>• Un plan maestro de biosólidos para Bogotá Distrito Capital</li> </ul> | Seguimiento del avance y la calidad de las actividades clave de asistencia técnica |
|--------------------------------------------------------|-----------------------------------------------------------------------------------------------------------------------------------------------------------------------------------------------------------------|------------------------------------------------------------------------------------|

### Mecanismos de seguimiento de los resultados

| <b>Indicadores de los efectos directos del proyecto</b>                                                                                                                                                                     | <b>Punto de referencia: 2010</b>                         | <b>2013</b>           | <b>2016</b>                         | <b>Frecuencia e informes</b> | <b>Responsabilidad de la recopilación de datos</b> |
|-----------------------------------------------------------------------------------------------------------------------------------------------------------------------------------------------------------------------------|----------------------------------------------------------|-----------------------|-------------------------------------|------------------------------|----------------------------------------------------|
| Una calidad del agua en la cuenca media del río Bogotá que cumpla con los parámetros de calidad del agua de clase IV para DBO (50 mg/l) y SST (40 mg/l)                                                                     | Clase VIII                                               | Clase VIII            | Clase IV                            | Informes de calidad del agua | CAR                                                |
| Logro de un parámetro de protección de control de inundaciones para el río Bogotá para un período de retorno de 100 años (es decir, menos del 1% de probabilidades de desbordamiento por año)                               | 10 años (mínimo)                                         | 10 años (mínimo)      | 100 años                            | Informes de construcción     | CAR                                                |
| La recuperación de ocho áreas multifuncionales a lo largo del río Bogotá con una superficie de aproximadamente 175 hectáreas y las siguientes características: zonas de inundaciones, hábitat ecológico y espacios públicos | 0 ha                                                     | 0 ha                  | 175 ha                              | Informes de construcción     | CAR                                                |
| <b>Indicadores de los efectos directos intermedios</b>                                                                                                                                                                      |                                                          |                       |                                     |                              |                                                    |
| Ampliación del caudal de diseño de la PTAR de 4 m <sup>3</sup> /s a alrededor de 8 m <sup>3</sup> /s para lograr un parámetro de descarga de 30/30 mg/l DBO/SST                                                             | Planta primaria de 4 m <sup>3</sup> /s en funcionamiento | Construcción iniciada | Planta secundaria en funcionamiento | Informes anuales             | CAR                                                |
| Construcción de 68 km de obras de control de inundaciones en el área metropolitana de Bogotá                                                                                                                                | 0 km                                                     | 30 km                 | 68 km                               | Informes de construcción     | CAR                                                |
| Un plan hídrico integrado para la cuenca del río Bogotá que sirva como herramienta de planificación para respaldar el objetivo de desarrollo del proyecto en el mediano plazo                                               | --                                                       | Estudio iniciado      | Estudio finalizado                  | Informes del estudio         | CAR                                                |
| Un plan de gestión del río para los 68 km del río Bogotá en el marco del componente 2                                                                                                                                       | --                                                       | Estudio iniciado      | Estudio finalizado                  | Informes del estudio         | CAR                                                |
| Un plan maestro de biosólidos para Bogotá Distrito Capital                                                                                                                                                                  | --                                                       | Estudio iniciado      | Estudio finalizado                  | Informes del estudio         | CAR                                                |

**Anexo 4: Descripción detallada del proyecto**  
**COLOMBIA: Proyecto de Adecuación Hidráulica y Recuperación Ambiental del**  
**Río Bogotá**

**Objetivo de desarrollo del proyecto e indicadores clave**

1. El objetivo del proyecto es ayudar a la prestataria a transformar el río Bogotá en un activo ambiental para la región metropolitana de Bogotá Distrito Capital mejorando la calidad del agua, reduciendo los riesgos de inundaciones y creando áreas multifuncionales a lo largo de dicho río. Los indicadores clave son los siguientes:
  - una calidad del agua en la cuenca media del río Bogotá que cumpla con los parámetros de calidad del agua de clase IV para DBO (50 miligramos/litro) y SST (40 miligramos/litro);
  - protección contra inundaciones del río Bogotá en el área metropolitana de Bogotá con una norma de diseño para un período de retorno de las inundaciones de, al menos, 100 años (es decir, menos del 1% de probabilidades de desbordamiento por año);
  - la recuperación de ocho áreas multifuncionales a lo largo del río Bogotá con una superficie de aproximadamente 175 hectáreas y las siguientes características: zonas de inundaciones, hábitat ecológico y espacios públicos.

**Descripción detallada de los componentes del proyecto**

2. El proyecto consta de cuatro componentes. Los mapas que se encuentran al final del documento de evaluación inicial del proyecto indican la ubicación del proyecto y sus principales componentes.
3. Componente 1. Mejoramiento y ampliación de la PTAR Salitre (US\$335 millones): Mejoramiento y ampliación de la PTAR Salitre para transformarla de una planta de tratamiento primario de 4 metros cúbicos/segundo en una planta de tratamiento secundario de alrededor de 8 metros cúbicos/segundo para tratar las aguas residuales de las microcuencas Salitre, Torca y Jaboque, para luego conducir las y descargarlas en el río Bogotá y posiblemente el distrito de riego La Ramada, incluida la prestación de servicios de consultoría para su diseño, construcción y supervisión.
4. Este componente incluye el mejoramiento y la ampliación de la planta de tratamiento primaria Salitre de 4 metros cúbicos/segundo a una planta secundaria de aproximadamente 8 metros cúbicos/segundo con desinfección, a fin de cumplir con la licencia ambiental actual y satisfacer las proyecciones de crecimiento de la población. El proyecto financiará las obras civiles, los equipos y los servicios. Este componente abarca las siguientes actividades:
  - Diseño técnico preliminar y preparación de documentos de licitación. La CAR contrató tareas de consultoría de fase I para realizar la evaluación del proceso de tratamiento, el diseño técnico preliminar y las estimaciones de costos, y la confección de los documentos de licitación.

- Diseño detallado y construcción a través de un sistema de ejecución de proyectos de diseño/construcción. La ampliación de la planta incluirá mejoras del canal de entrada y la estación de bombeo, clarificadores primarios adicionales, un nuevo proceso de tratamiento secundario, instalaciones de desinfección, procesos de espesamiento y drenaje, digestores anaerobios adicionales, instalaciones de cogeneración, control de olores, un monovteredero para la eliminación de biosólidos, e instalaciones auxiliares. Las nuevas instalaciones se ubicarán en el emplazamiento actual de la planta.
  - Gestión del proyecto (servicios de consultoría de fase II). Durante la vigencia del contrato de diseño y construcción, un contratista de gestión de proyectos (denominado “interventor” en Colombia) realizará las actividades de control de calidad, seguimiento e inspección, administración de contratos, y coordinación y gestión generales.
  - Puesta en marcha y funcionamiento inicial de la planta. El contratista de diseño/construcción pondrá en marcha la planta y colaborará con la compañía de abastecimiento de agua en las actividades de operación y mantenimiento.
  - A los efectos de la ejecución de las obras para conducir los efluentes tratados desde la PTAR Salitre hasta el distrito de riego La Ramada, el componente financiará los estudios técnicos, financieros, económicos, sociales y ambientales adicionales necesarios para demostrar la viabilidad de las obras propuestas, y garantizará el cumplimiento de las medidas y los planes ambientales y sociales necesarios de acuerdo con las disposiciones de las políticas de salvaguardia del Banco.
5. Componente 2. Adecuación Hidráulica y Mejoramiento Ambiental (US\$140 millones): Reducción del riesgo de inundaciones y creación de zonas multifuncionales a lo largo del río Bogotá mediante la realización de obras de control de inundaciones y mejoras ambientales, entre las que se incluyen el dragado del río, la construcción de terraplenes, la restauración de hábitats ribereños, meandros y humedales, la adquisición de tierras, el desplazamiento involuntario de personas, paisajismo y la creación de parques, y la prestación de servicios de consultoría para su diseño, construcción y supervisión.
6. Como se muestra en los mapas (anexo 15), este componente cubre un tramo de 68 kilómetros del río Bogotá, desde Puente La Virgen hasta Alicachín, cerca del lago Muña. El componente incluye las siguientes actividades:
- Adquisición de tierras, reasentamiento e indemnización: Las obras del río se dividen en cuatro secciones que tienen aproximadamente la misma longitud (tramos A-D). El componente 2 requiere la compra de porciones de tierras de 211 parcelas a lo largo de los tramos A-D, la mayoría de las cuales se encuentran en zonas rurales y son propiedad de productores o instituciones del Gobierno. Sin embargo, en el tramo C existe un área urbana pobre denominada “El Porvenir”, en el municipio de Mosquera, que requiere la reubicación de alrededor de 188 unidades sociales.
  - Obras de control de inundaciones: A fin de brindar protección contra inundaciones con un período de retorno de 100 años, el proyecto mejorará el actual sistema de diques mediante la construcción de un nuevo terraplén en la ribera izquierda o derecha del río, con una berma de

30 metros. Las obras incluirán excavaciones de canales, movimientos de tierra y construcción de diques.

- Paisajismo y restauración del hábitat ribereño: A lo largo de los 68 kilómetros, las obras también incluirán la plantación de especies autóctonas y obras de paisajismo para armonizar los terraplenes con las áreas adyacentes en función de los requisitos de uso de la tierra.
- Recuperación de ocho áreas multifuncionales, incluida la integración ecológica e hidráulica con el río Bogotá: Según las características físicas, en las áreas se restaurarán los meandros del río, se crearán y mejorarán los humedales, y se crearán espacios públicos para que los habitantes puedan disfrutar del río urbano. Las áreas multifuncionales se incluyen en el siguiente cuadro.

| Secciones | Nombre                            | Tipo de intervención                                      | Objetivo                                                                                                                                  | Superficie en hectáreas |
|-----------|-----------------------------------|-----------------------------------------------------------|-------------------------------------------------------------------------------------------------------------------------------------------|-------------------------|
| A         | Meandro Tequendam                 | Restauración del río                                      | Integración de las anteriores áreas del lecho del río y las llanuras aluviales                                                            | 6,5                     |
|           | Tierras bajas inundadas de Canoas | Restauración del río                                      | Integración de las llanuras aluviales con la dinámica de las aguas del río Bogotá                                                         | 23                      |
|           | Lago Canoas                       | Restauración del río                                      | Integración del lago con la dinámica de las aguas del río Bogotá                                                                          | 18                      |
|           | Meandros de Canoas-Indumil        | Recreación pública/mejoras ambientales                    | Creación de áreas inundadas o lagos y áreas con vegetación para promover la recuperación ecológica; mejora de la calidad del agua         | 18,4                    |
| B         | Parque Náutico Vuelta Grande      | Recreación pública/mejoras ambientales                    | Creación de áreas inundadas o lagos y áreas con vegetación para promover la recuperación ecológica                                        | 18,3                    |
| C         | Meandro del Say                   | Recreación pública/mejoras ambientales                    | Creación de tierras bajas inundadas o lagos y áreas con vegetación para promover la recuperación ecológica; mejora de la calidad del agua | 67                      |
|           | Complejo de meandros y humedales  | Restauración del río (Jaboque, La Florida, Juan Amarillo) | Integración de las anteriores áreas del lecho del río y las llanuras aluviales del río Bogotá; mejora de la calidad del agua              | 10                      |
| D         | Espacios públicos de Suba         | Restauración del río                                      | Integración de las anteriores áreas del lecho del río y las llanuras aluviales del río                                                    | Por determinar          |

|  |  |  |                                                                                                                             |  |
|--|--|--|-----------------------------------------------------------------------------------------------------------------------------|--|
|  |  |  | Bogotá; mejora de la calidad del agua; integración con parques de meandros y tierras bajas, incluido el humedal La Conejera |  |
|--|--|--|-----------------------------------------------------------------------------------------------------------------------------|--|

7. Componente 3. Estudios ambientales y del agua (US\$7 millones): Realización de estudios para contribuir a la sostenibilidad ambiental del río Bogotá, incluida la elaboración de lo siguiente: i) un plan de gestión integral de recursos hídricos para la cuenca del río Bogotá; ii) un plan maestro de biosólidos para la región metropolitana de Bogotá Distrito Capital, y iii) un plan de gestión para el río Bogotá, y la prestación de los servicios de consultoría correspondientes. Los siguientes son los detalles de cada estudio:
- Plan Integral de Gestión de Recursos Hídricos para la Cuenca del Río Bogotá: Este estudio ayudará a la CAR y a otros organismos a definir los objetivos ambientales en la cuenca del río Bogotá y a elaborar programas de inversión a mediano y largo plazo basados en los actuales instrumentos de planificación y elaboración de modelos, los nuevos modelos de toma de decisiones, y los estudios acerca de aspectos ambientales, técnicos, económicos e institucionales.
  - Plan Maestro de Biosólidos en la ciudad de Bogotá: El objetivo es elaborar un plan sostenible de manejo de biosólidos para la ciudad de Bogotá que tenga en cuenta las opciones de reutilización/eliminación, el marco normativo y las tecnologías adecuadas disponibles.
  - Plan de Gestión Dinámica del Río Bogotá: Este proyecto incluye un estudio de factibilidad y diseño detallado para optimizar la recuperación de las áreas multifuncionales como hábitats ecológicos, recreación pasiva y posibles sistemas de tratamiento naturales. Además, incluye la elaboración de un manual de operación y mantenimiento para las obras de control de inundaciones del río.
8. Componente 4. Gestión y administración del proyecto (US\$5 millones): Fortalecimiento de la capacidad de la prestataria para la ejecución diaria del proyecto, lo que incluye i) el cumplimiento de la gestión financiera, ambiental y de adquisiciones, requisitos de presentación de informes y control y supervisión de actividades, ejecución del PAR y el PGA; ii) la realización de una campaña de difusión pública; iii) capacitación, y iv) la prestación de los servicios de consultoría correspondientes.

### Anexo 5: Costos del proyecto

#### COLOMBIA: Proyecto de Adecuación Hidráulica y Recuperación Ambiental del Río Bogotá

**Cuadro 1: Estimaciones de los costos del proyecto**  
(en millones de US\$)

| <b>Componentes</b>                                                              | <b>Costos</b> |     |
|---------------------------------------------------------------------------------|---------------|-----|
| 1. PTAR Salitre                                                                 | 335           |     |
| Contrato llave en mano de construcción de la PTAR                               |               | 322 |
| Gestión del proyecto/supervisión de la construcción                             |               | 13  |
| 2. Adecuación Hidráulica y mejoras ambientales en el río Bogotá                 | 140           |     |
| Control de inundaciones y obras de paisajismo                                   |               | 48  |
| Áreas multifuncionales                                                          |               | 18  |
| Supervisión de la construcción                                                  |               | 3   |
| Adquisición de tierras y reasentamiento                                         |               | 71  |
| 3. Estudios ambientales y del agua                                              | 7             |     |
| Plan Integral de Gestión de los Recursos Hídricos para la Cuenca del Río Bogotá |               | 3   |
| Plan Maestro de Biosólidos para Bogotá                                          |               | 2   |
| Plan de Gestión Dinámica del Río                                                |               | 2   |
| 4. Gestión y administración del proyecto                                        | 5             |     |
| Unidad de ejecución del proyecto                                                |               | 2,2 |
| Consultores especializados nacionales e internacionales                         |               | 1,5 |
| Campañas de comunicación y difusión pública                                     |               | 1,3 |
| <b>Total</b>                                                                    | <b>487</b>    |     |

**Cuadro 2: Estimaciones del financiamiento, por componente**  
(en millones de US\$)

| <b>Componentes</b>                                | <b>Costos totales</b> | <b>Financiamiento del Banco Mundial</b> | <b>Financiamiento de la CAR</b> |
|---------------------------------------------------|-----------------------|-----------------------------------------|---------------------------------|
| 1. PTAR Salitre                                   | 335                   | 200                                     | 135                             |
| 2. Adecuación Hidráulica y Mejoramiento Ambiental | 140                   | 41                                      | 99                              |
| Obras/consultores                                 | 69                    | 41                                      | 28                              |
| Adquisición de tierras y reasentamiento           | 71                    |                                         | 71                              |
| 3. Estudios ambientales y del agua                | 7                     | 7                                       | 0                               |
| 4. Gestión y administración del proyecto          | 5                     | 2                                       | 3                               |
| <b>Total</b>                                      | <b>487</b>            | <b>250</b>                              | <b>237</b>                      |

*Nota:* La prestataria pagará directamente la comisión inicial de 25 puntos básicos (US\$625 000) y no se incluye en el cuadro dado que no se pagará a través del préstamo.

**Cuadro 3: Asignación de los fondos del préstamo y porcentajes de financiamiento, por categoría**  
(en millones de US\$)

| Categoría                                     | Monto del préstamo asignado<br>(expresado en US\$) | Porcentaje de gastos por financiar<br>(impuestos incluidos) |
|-----------------------------------------------|----------------------------------------------------|-------------------------------------------------------------|
| 1) Obras y bienes                             | <b>224 000 000</b>                                 | <b>100%</b>                                                 |
| 2) Servicios de consultoría                   | <b>25 000 000</b>                                  | <b>100%</b>                                                 |
| 3) Costos operativos, capacitación y talleres | <b>1 000 000</b>                                   | <b>100%</b>                                                 |
| <b>Total</b>                                  | <b>250 000 000</b>                                 |                                                             |

## **Anexo 6: Mecanismos de ejecución**

### **COLOMBIA: Proyecto de Adecuación Hidráulica y Recuperación Ambiental del Río Bogotá**

1. ***Prestataria y organismos de ejecución.*** La prestataria será la CAR, y la República de Colombia, a través del Ministerio de Hacienda, garantizará el préstamo. La CAR es el organismo de ejecución del proyecto y se encargará de las actividades relacionadas con la gestión de los fondos, las adquisiciones, la ejecución, el seguimiento y la presentación de informes dentro del marco del proyecto.
2. ***Supervisión, coordinación y ejecución del proyecto.*** El Consejo Directivo y la Gerencia de la CAR estarán encargados de la supervisión del proyecto. El MAVDT y el DNP se asegurarán de que se mantenga la compatibilidad con las políticas nacionales del Gobierno con respecto al programa ambiental del río Bogotá y ofrecerán apoyo y orientación durante la ejecución. Asimismo, el MAVDT verificará que el proyecto cumpla con la licencia ambiental para la construcción y el funcionamiento de la PTAR Salitre.
3. La CAR ejecutará todo el proyecto. Como condición para la entrada en vigor del préstamo, la CAR establecerá una unidad específica de ejecución del proyecto, la UEP (la cual se denomina UEP-FIAB en el Manual operativo), y un jefe de proyectos, quien rendirá cuentas directamente al Director General de la CAR y será responsable de la ejecución, gestión, coordinación y supervisión diarias del proyecto.
4. Según lo definido en el Convenio 171, firmado en 2007 por la CAR, la EAAB y el Gobierno de Bogotá Distrito Capital, la CAR es responsable del financiamiento y la ejecución de las siguientes actividades: i) el mejoramiento y la ampliación de la PTAR Salitre para tratar, las aguas residuales de las microcuencas Salitre, Torca y Jaboque, para luego conducir las y descargarlas en el río Bogotá y posiblemente en el distrito de riego La Ramada, y ii) el control de inundaciones y las mejoras ambientales en la cuenca media del río Bogotá. La CAR y la EAAB deberán colaborar estrechamente entre sí durante la construcción de las obras y el funcionamiento de la planta. Como se indica en el Convenio 171, inicialmente la CAR será la propietaria formal de los activos financiados en el marco del proyecto, pero la EAAB será responsable del funcionamiento y mantenimiento de la PTAR Salitre. La CAR será propietaria de las obras del río financiadas en el marco del proyecto y de las propiedades ribereñas adyacentes. La CAR también será responsable del mantenimiento y funcionamiento de las obras del río. Debido a que el sistema de drenaje de aguas pluviales de la EAAB desemboca en el río Bogotá, la EAAB y la CAR deberán colaborar estrechamente entre sí en el diseño y funcionamiento de las obras del río.
5. Conforme al Convenio 171, la CAR y la EAAB acuerdan establecer un comité directivo, conformado por el Director General de la CAR y el Gerente General de la EAAB, como mecanismo para supervisar la ejecución de dicho convenio. Los mecanismos generales de ejecución se describen en el gráfico 1, a continuación.

**Gráfico 1: Mecanismos de ejecución del proyecto**

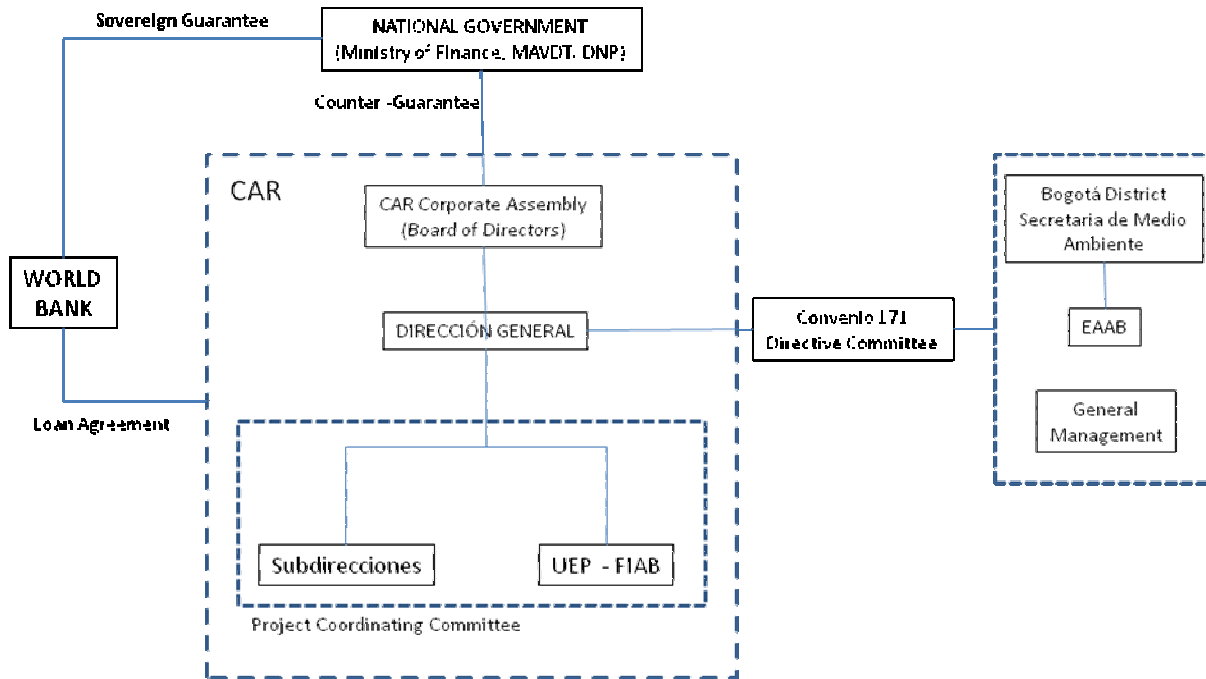

6. En septiembre de 2007, la CAR creó un grupo de asesores para la Gerencia General con fondos del FIAB para brindar asistencia técnica durante el período de preparación del proyecto. Este grupo de asesores, que formará parte de la nueva UEP, está bien capacitado y está conformado por aproximadamente 15 profesionales, entre ellos, ingenieros, especialistas en materia de medio ambiente, un abogado, especialistas en temas sociales y en reasentamiento, un especialista en adquisiciones, especialistas en gestión financiera y personal de apoyo. Como condición para la entrada en vigor del préstamo, la CAR aceptó constituir una estructura formal de gestión del proyecto, denominada UEP, con líneas de autoridad claras y un jefe de proyecto específico.

7. Dentro de la UEP habrá grupos sociales y ambientales específicos que supervisarán la ejecución del PGA y el plan de adquisición de tierras y reasentamiento (Plan de Acción para el Reasentamiento, PAR) aprobados por el Banco. De ser necesario, la UEP contará con el apoyo de otros departamentos especializados de la CAR y consultores especializados con contratos a corto plazo. En el gráfico 2, a continuación, se presenta la estructura preliminar de la UEP, según se incluyó en el borrador del Manual operativo.

**Gráfico 2: Estructura propuesta para la UEP y la CAR**

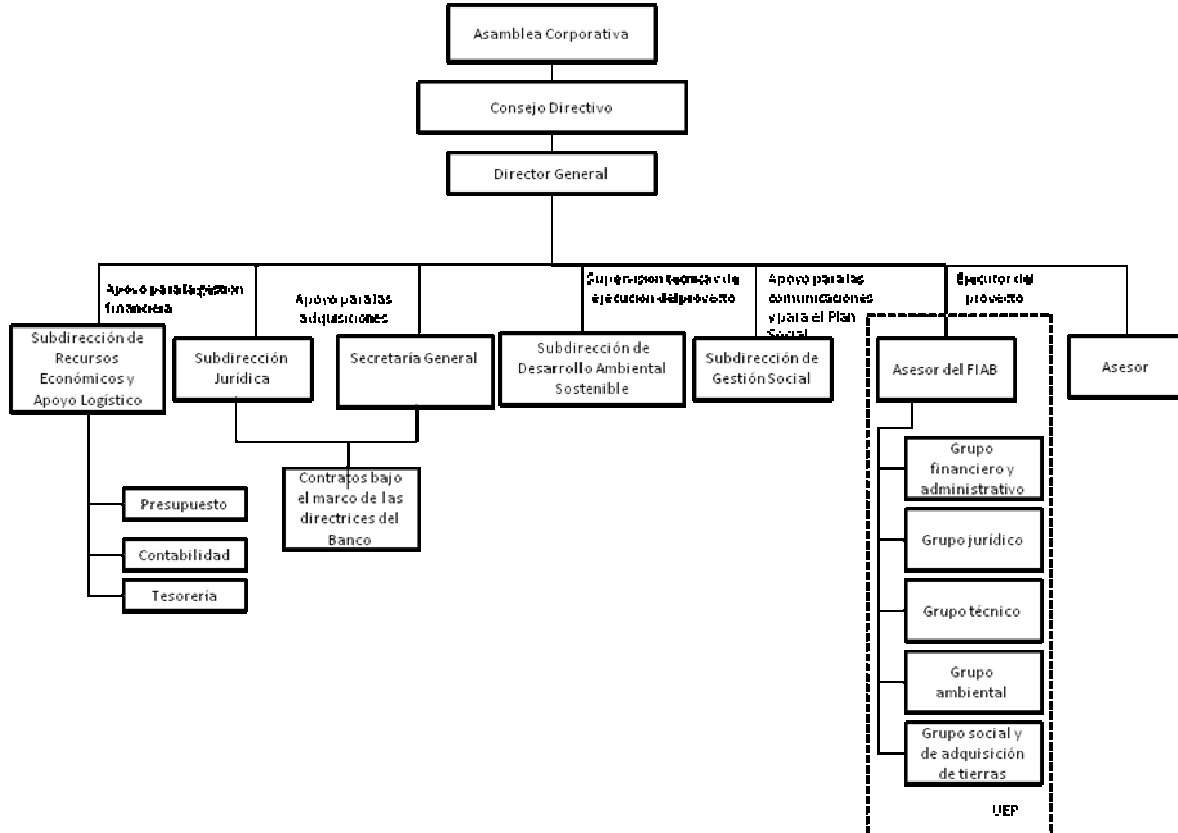

8. Las responsabilidades de la gestión financiera estarán a cargo de la Subdirección de Recursos Económicos y Apoyo Logístico de la CAR e incluirán la coordinación de los procedimientos financieros y administrativos relacionados con la presupuestación, tesorería, contabilidad general y presentación de informes del proyecto.

9. **Contratos de construcción y de servicios de consultoría.** Debido al desafío especial que se plantea al gestionar el extenso diseño detallado y el contrato de construcción de la PTAR Salitre, la CAR contratará a una empresa de consultoría especializada para supervisar el diseño detallado, la construcción y la puesta en servicio de dicha planta. Los consultores aportarán importantes conocimientos en materia de gestión para ayudar a la CAR, así como también para supervisar el diseño detallado y la construcción. Se espera que la empresa de consultoría para la planta Salitre se constituya en un nexo importante entre la EAAB y la CAR en la ejecución del proyecto Salitre mediante el Convenio 171. Con respecto a las obras del río del componente 2, la CAR contratará empresas a cargo de la supervisión de la construcción para fiscalizar estos contratos de construcción. Algunos de los programas de asistencia técnica propuestos en el componente 3, en particular, el Plan de Gestión Integral de los Recursos Hídricos de la Cuenca y el Plan Maestro de Biosólidos, afectan directamente a la EAAB. La CAR será la empleadora en estos contratos de consultoría y estará a cargo de la supervisión directa; sin embargo, trabajará en conjunto con la EAAB a través del Convenio 171.

**Anexo 7: Mecanismos de gestión financiera y desembolsos**  
**COLOMBIA: Proyecto de Adecuación Hidráulica y Recuperación Ambiental del**  
**Río Bogotá**

1. En este anexo se documenta la Evaluación de la Gestión Financiera de la CAR, la autoridad ambiental regional del Departamento de Cundinamarca, la cual será la entidad a cargo de la ejecución del Proyecto Ambiental del Río Bogotá (el “Proyecto”). El personal del Banco realizó la evaluación conforme a la OP/BP 10.02 (Gestión Financiera) y las Directrices para la Evaluación de los Mecanismos de Gestión Financiera en los Proyectos Financiados por el Banco Mundial.

**Resumen**

2. El proyecto se ejecutará de conformidad con el sistema financiero de la CAR, el cual está integrado, en gran parte, en los sistemas de gestión financiera del país, e incluye contabilidad, control interno y auditoría. La CAR tiene autonomía presupuestaria y su Consejo Directivo aprueba la conformación y modificación del presupuesto de dicho organismo. La CAR no ha ejecutado proyectos financiados por el Banco Mundial anteriormente, pero tiene experiencia previa con un préstamo y una donación del BID. No obstante, aunque el monto del préstamo propuesto es relativamente alto, la ejecución del proyecto se concentra en una sola entidad (la CAR) y en actividades específicas con mecanismos simples de flujo de fondos. El riesgo inherente de la gestión financiera en la etapa de negociaciones es moderado debido a los factores ya mencionados; el riesgo residual de dicha gestión, es decir, el riesgo inherente mitigado por los controles existentes, descrito detalladamente en este anexo, es moderado.

3. Los factores de control incluyen los siguientes:

1. uso de sistemas nacionales para los mecanismos de gestión financiera;
2. los métodos que se utilizarán para los desembolsos serán el anticipo, el reembolso y el pago directo;
3. el proyecto está sujeto a los procedimientos internos y de calidad de la entidad y debe rendir cuentas al Departamento Administrativo de la Función Pública y a la Contaduría General de la Nación;
4. la CAR elaborará y enviará al Banco Mundial informes financieros provisionales (IFP) semestrales no auditados;
5. los estados financieros y los estados de gastos del proyecto estarán sujetos a auditorías externas anuales, las cuales estarán a cargo de auditores que sean aceptables para el Banco;
6. el Banco realizará, por lo menos, una misión completa de supervisión de la gestión financiera por año; al finalizar cada misión, se recomendará una calificación del estado de la ejecución de la gestión financiera y, de ser necesario, se actualizará el riesgo vinculado a la gestión financiera.

4. Los mecanismos de gestión financiera del proyecto, según se describen en el presente, están en consonancia con las políticas del Banco Mundial. Las medidas pendientes acordadas son a) enviar la versión final del Manual operativo del proyecto, que debe incluir una sección específica sobre gestión financiera aceptable para el Banco, y b) una vez disponible, enviar al Banco el informe de auditoría de la CAR emitido por la CGR sobre los estados financieros al 31 de diciembre de 2008 y 2009, y el plan de mejora acordado.

## **Descripción y evaluación de los mecanismos de gestión financiera del proyecto**

### ***Problemas del país pertinentes al proyecto***

5. El Banco mantiene un compromiso con el Gobierno de Colombia para mejorar la gestión financiera del proyecto de toda la cartera y promover el uso de sistemas de gestión financiera nacionales sobre la base del fortalecimiento de la capacidad institucional. Según lo documentado en el examen de los resultados de las operaciones de la cartera del país, que tuvo lugar en febrero de 2007, se han logrado importantes avances: a) desde junio de 2006, se generan IFP del proyecto en el Sistema Integrado de Información Financiera del país; b) el Ministerio de Hacienda y Crédito Público (MHCP), la CGR y el Banco acordaron los términos de referencia y un memorando de entendimiento para las auditorías del proyecto, y c) el MHCP, el DNP y el Banco firmaron un memorando de entendimiento para que los organismos de ejecución sean los responsables directos de la gestión del proyecto. A estos fines, los mecanismos de gestión financiera de este proyecto utilizan, en gran medida, la capacidad y los procedimientos institucionales de la CAR.

### ***Mecanismos de ejecución***

6. La Subdirección de Recursos Económicos y Apoyo Logístico de la CAR asumirá las responsabilidades de gestión financiera en estrecha colaboración con los especialistas en finanzas de la UEP. Las responsabilidades principales dentro de las líneas directivas y funcionales de la CAR incluirán la coordinación de los procedimientos financieros y administrativos en materia de presupuestación, tesorería, contabilidad general y presentación de informes del proyecto.

### ***Organización y dotación de personal***

7. Si se requiriese asistencia adicional para las gestiones relacionadas con el proyecto, se contrataría personal temporario que rendiría cuentas directamente a la estructura de la UEP bajo el ámbito del Director General. La sección de gestión financiera del Manual operativo incluirá en detalle las responsabilidades de dicha gestión de cada miembro del equipo, además de la estructura de ejecución, los flujos de trabajo y la dotación de personal. En el cuadro que se halla a continuación, se describen las responsabilidades de gestión financiera de los principales procesos de esa índole.

**Cuadro A7.1: Responsabilidades de gestión financiera de los principales procesos**

| Proceso                               | CAR                                                                                                                                                                                                                                                                                                                                                |
|---------------------------------------|----------------------------------------------------------------------------------------------------------------------------------------------------------------------------------------------------------------------------------------------------------------------------------------------------------------------------------------------------|
| Presupuestación                       | Prepara y registra los presupuestos anuales en los centros de costos asignados para el proyecto.                                                                                                                                                                                                                                                   |
| Recibos                               | Prepara las solicitudes de retiro de fondos y registra los recibos emitidos en la cuenta del Banco designada para los fondos del préstamo.<br>Proporciona aportes locales y garantiza su asiento en los registros del proyecto.                                                                                                                    |
| Pagos                                 | Designa las fuentes de financiamiento de acuerdo con los mecanismos de financiamiento del proyecto.<br>Si en la conciliación o los informes de auditoría o si, como resultado de la supervisión del Banco, surgiera una situación de inadmisibilidad, la CAR reintegrará los montos correlacionados a la cuenta designada o directamente al Banco. |
| Saldos de caja                        | Abre la cuenta bancaria designada para los fondos del préstamo.<br>Prepara las conciliaciones mensuales de la cuenta bancaria designada.                                                                                                                                                                                                           |
| Contabilidad                          | Lleva la contabilidad del proyecto y está a cargo del sistema de información en el sistema financiero integrado de la entidad (Finanzas 2000).                                                                                                                                                                                                     |
| IFP                                   | Realiza exámenes y envía informes financieros del proyecto al Banco semestralmente.                                                                                                                                                                                                                                                                |
| Estados financieros auditados anuales | Coordina su examen con la CGR. Luego de la auditoría, la CAR examina, distribuye, publica y envía al Banco los estados financieros auditados anuales del proyecto.                                                                                                                                                                                 |

### ***Mecanismos presupuestarios***

8. En el marco de los planes operativos anuales del proyecto, la CAR actualizará y confeccionará el presupuesto anual durante la ejecución del proyecto, y controlará su ejecución mensualmente. Esta tarea será parte integrante de la gestión del ciclo presupuestario propio de la entidad y se procesará a través de su sistema presupuestario integrado en Finanzas 2000. El Banco examinará los planes operativos y de adquisiciones anuales.

### ***Sistemas de contabilidad e información***

9. La contabilidad del proyecto se integrará al sistema de contabilidad del organismo (Finanzas 2000), sistema administrativo y financiero integrado en línea, en el cual los módulos de Presupuestación, Contabilidad, Contratos, Cuentas por cobrar y Tesorería están vinculados. El sistema se implementó en la CAR en 1999, y los usuarios de la unidad financiera están satisfechos con el desempeño. La contabilidad del proyecto se integrará al plan de cuentas del organismo mediante asignación interna (centro de costos).

### ***Controles internos***

10. El sistema de control interno del proyecto incorporaría las políticas y los procedimientos que establece la Oficina de Control Interno (OCI) de la CAR. El informe que la OCI emitió el 23 de febrero de 2009 señaló que, en coordinación con la ejecución y articulación del Modelo Estándar de Control Interno y el sistema de calidad y gestión, la situación general del Sistema de Control Interno en la CAR contaba con los avances adecuados, por lo que obtuvo una calificación de entre el 80% y el 100%.

11. En el marco de las actividades habituales relacionadas con el presupuesto de la CAR, la OCI colaboraría durante la ejecución del proyecto para poder alcanzar los resultados y objetivos y garantizar una ejecución eficiente. Colaboraría, además, con la supervisión durante la incorporación de políticas administrativas, la protección de los activos financieros y de otra índole, la prevención y detección de fraude y errores, la presentación y el registro de operaciones financieras de manera completa y oportuna, y la presentación de información financiera confiable.

### ***Procedimientos por escrito***

12. En el Manual operativo, se describirán los procedimientos financieros del proyecto y se definirán las funciones y responsabilidades del equipo de gestión financiera del proyecto. Antes de las negociaciones, se enviará al Banco un borrador del Manual operativo que incluirá, entre otros procedimientos financieros, los siguientes: a) políticas y procedimientos contables, con inclusión de los criterios de contabilidad; b) gráficos de flujo de caja con los procedimientos detallados; c) requisitos de presentación de informes basados en los acuerdos celebrados entre la CAR y el Banco; d) procedimientos de control interno, entre ellos, criterios y procedimientos para procesar pagos; e) gestión de registros, y f) mecanismos de auditoría.

### ***Presentación de informes financieros y de gestión***

13. La UEP, en estrecha coordinación con la Subdirección de Recursos Económicos y Apoyo Logístico, revisará y enviará al banco los IFP generados desde el sistema financiero del organismo. Estos incluirán lo siguiente: a) informe sobre los pagos realizados desde la cuenta bancaria designada para el proyecto; b) informe de compromisos; c) balance general; d) estado de inversiones acumuladas (con cifras reales y presupuestadas) y saldos de caja, y f) notas a los estados financieros.

14. Los IFP se enviarán al Banco semestralmente, dentro de los 45 días posteriores al cierre de cada período (es decir, antes del 15 de agosto y del 15 de febrero). Estos informes servirán como base para los estados financieros anuales objeto de auditoría, en los que, a su vez, también se incluirá una declaración por parte de la gestión del proyecto que indique que los fondos del préstamo fueron usados conforme a las finalidades previstas, especificadas en el convenio de préstamo. Los estados financieros anuales, una vez auditados, se enviarán al Banco, a más tardar seis meses después del cierre de cada año civil.

15. La CAR conservará la documentación de respaldo de los estados financieros, la que se pondrá a disposición de las misiones de supervisión del Banco Mundial y de los auditores externos.

### ***Gestión de tesorería y flujo de fondos***

16. El Banco desembolsará los fondos del préstamo en dólares estadounidenses en una cuenta designada en el Banco de la República. La Subdirección de Recursos Económicos y Apoyo Logístico de la CAR está encargada de autorizar los pagos a los contratistas dentro del marco del proyecto. También puede, si lo considera apropiado y en conformidad con el marco normativo nacional de Colombia, solicitar el pago directo del contrato internacional principal para la

construcción de la PTAR Salitre (componente 1). La subdirección también es responsable de convertir, conforme sea necesario y en conformidad con el marco normativo nacional de Colombia, parte del desembolso en pesos colombianos para realizar los pagos de los contratos en la moneda nacional.

### **Programa de flujo de fondos**

17. Para cubrir el riesgo cambiario de la deuda, la CAR está interesada en el financiamiento en moneda nacional, por lo cual se acordó continuar el diálogo con el Departamento de Actividades Bancarias y Gestión de la Deuda.

### ***Mecanismos de desembolso***

18. En general, los gastos admisibles se reconocerán en el momento del pago de los bienes, las obras y los consultores correspondientes a los componentes 1, 2 y 3 del proyecto. Si en los informes de auditoría o si, como resultado de la supervisión del Banco, surgiera una situación de inadmisibilidad, la CAR reintegrará los montos correlacionados a la cuenta designada o directamente al Banco.

***Cuadro por categoría***  
(en millones de US\$)

| <b>Categoría</b>                              | <b>Monto del préstamo asignado<br/>(expresado en US\$)</b> | <b>Porcentaje de gastos por financiar<br/>(impuestos incluidos)</b> |
|-----------------------------------------------|------------------------------------------------------------|---------------------------------------------------------------------|
| 1) Obras y bienes                             | <b>224 000 000</b>                                         | <b>100%</b>                                                         |
| 2) Servicios de consultoría                   | <b>25 000 000</b>                                          | <b>100%</b>                                                         |
| 3) Costos operativos, capacitación y talleres | <b>1 000 000</b>                                           | <b>100%</b>                                                         |
| <b>Total</b>                                  | <b>250 000 000</b>                                         |                                                                     |

### ***Mecanismos de desembolso y documentación***

19. El proyecto tendrá acceso a los fondos depositados por el Banco por anticipado en una cuenta separada, en dólares estadounidenses o pesos colombianos, para el procesamiento de los desembolsos para los gastos admisibles en virtud de las actividades del proyecto. Los métodos de desembolso que se usarán en el marco del préstamo propuesto son los siguientes: pago directo, reembolso y anticipo. Los fondos depositados en la cuenta designada como anticipos se regirán por las políticas y los procedimientos de desembolso vigentes del Banco, tal como se describen en la carta de desembolsos.

20. El tope autorizado, es decir, el monto máximo que puede depositarse en espera de la presentación al Banco de la documentación que acredite el uso de los fondos anticipados depositados en la cuenta designada, se fijó en US\$60 millones.

21. Todas las solicitudes de retiro de fondos estarán totalmente respaldadas por la documentación apropiada (es decir, facturas, recibos y cualquier otro comprobante de pago), salvo los gastos de contratos por debajo del umbral de los estados de gastos (“umbral de documentación”), según se indicará en la carta de desembolsos. La CAR será responsable de

preparar y enviar al Banco las solicitudes de retiro de fondos. Toda la documentación de respaldo de las solicitudes de retiro de fondos (incluso aquella en la cual se utilicen estados de gastos) deberá permanecer en su ubicación central y estar disponible para revisión por parte de las misiones de supervisión del Banco y los auditores externos. La prestataria y el organismo de ejecución del proyecto conservarán todos los registros (contratos, pedidos, facturas, notas, recibos y otros documentos) que acrediten los gastos en el marco de las partes pertinentes del proyecto, como mínimo: i) un año después de que el Banco haya recibido los estados financieros auditados que abarquen el período durante el cual se realizó el último retiro de la cuenta del préstamo; ii) dos años después de la fecha de cierre (de ambas fechas, la que ocurra en último término). La prestataria y el organismo de ejecución del proyecto permitirán que los representantes del Banco examinen dichos registros.

### ***Auditorías externas***

22. Los estados financieros anuales del proyecto serán auditados anualmente, conforme a los términos y las condiciones que el Banco considere satisfactorios. Los informes de auditoría y los estados correspondientes se enviarán al Banco dentro de los seis meses posteriores al cierre del ejercicio de la prestataria. La CGR auditó los estados financieros de la CAR correspondientes al año civil 2008. El informe de la auditoría se enviará al Banco tan pronto como esté disponible. Además, el auditor legal de la CAR emitió una opinión sin reservas sobre los estados financieros mencionados.

### ***Riesgo de la gestión financiera***

23. En la matriz de evaluación de los riesgos que figura en el cuadro que se halla a continuación, se indican los posibles riesgos del programa desde el punto de vista de la gestión financiera.

**Cuadro A7.2: Matriz de evaluación de los riesgos de la gestión financiera**

| <b>Riesgo inherente</b>                         |          | <b>Comentarios/mitigación</b>                                                                                                                                                                                                                                                                                                                         |
|-------------------------------------------------|----------|-------------------------------------------------------------------------------------------------------------------------------------------------------------------------------------------------------------------------------------------------------------------------------------------------------------------------------------------------------|
| i. Específico del país                          | M        | Las cuestiones nacionales se abordan en el marco de los sistemas nacionales.                                                                                                                                                                                                                                                                          |
| ii. Específico del organismo                    | M        | Seguimiento de los planes de mejora acordados con la CGR.                                                                                                                                                                                                                                                                                             |
| iii. Específico del proyecto                    | M        | El monto del préstamo propuesto es relativamente alto, pero la ejecución del proyecto se concentra en una sola entidad (la CAR).                                                                                                                                                                                                                      |
| <b>Riesgo de control</b>                        |          |                                                                                                                                                                                                                                                                                                                                                       |
| i. Presupuestación                              | M        | La CAR adoptará los procedimientos del Manual operativo, los cuales estarán sujetos a la supervisión de la auditoría de la CGR y la supervisión habitual del Banco.                                                                                                                                                                                   |
| ii. Contabilidad                                | M        | Ídem.                                                                                                                                                                                                                                                                                                                                                 |
| iii. Control interno                            | M        | Ídem.                                                                                                                                                                                                                                                                                                                                                 |
| iv. Flujo de fondos                             | B        | Mecanismos de flujo de fondos simples. (Un contrato internacional importante representa el 80% de los fondos del préstamo). Si en los informes de auditoría o si, como resultado de la supervisión del Banco, surgiera una situación de inadmisibilidad, la CAR reintegrará los montos correlacionados a la cuenta designada o directamente al Banco. |
| v. Informes financieros                         | M        | Los IFP se generarán en el sistema financiero integrado del organismo (Finanzas 2000).                                                                                                                                                                                                                                                                |
| vi. Auditoría                                   | M        | Se han acordado los modelos de los términos de referencia con la CGR. El Banco Mundial y el BID brindan capacitación y asistencia técnica.                                                                                                                                                                                                            |
| <b>Riesgo residual de la gestión financiera</b> | <b>M</b> |                                                                                                                                                                                                                                                                                                                                                       |

Definiciones:

A = alto; S = significativo; M = moderado; B = bajo.

El *riesgo inherente de gestión financiera* se define como el que surge del entorno en el cual se ubica el proyecto.

El *riesgo de control de la gestión financiera* se define como el riesgo de que el sistema de gestión financiera del proyecto sea inadecuado para garantizar que los fondos del proyecto se usen de manera económica y eficaz, y para el fin previsto.

La ejecución de los mecanismos de gestión financiera que se describen en este anexo (y que se detallarán en el Manual operativo) tiene como objetivo mantener el riesgo de control general de la gestión financiera y la *calificación del riesgo residual de la gestión financiera* (que se define como la combinación del riesgo inherente y de control del proyecto mitigado por los marcos de control del cliente y la labor de supervisión del Banco) en un nivel general moderado.

#### ***Plan de supervisión de la gestión financiera del Banco***

24. El equipo de gestión financiera revisará los IFP semestrales y los informes anuales de auditoría y realizará, por lo menos, una misión de supervisión por año.

## **Anexo 8: Mecanismos de adquisiciones**

### **COLOMBIA: Proyecto de Adecuación Hidráulica y Recuperación Ambiental del Río Bogotá**

#### **A. Aspectos generales**

1. ***Las adquisiciones del proyecto propuesto*** se realizarían conforme a lo dispuesto en los documentos del Banco Mundial *Normas: Adquisiciones con préstamos del BIRF y créditos de la AIF*, de mayo de 2004, revisado en octubre de 2006 y mayo de 2010, y *Normas: Selección y contratación de consultores por prestatarios del Banco Mundial*, de mayo de 2004, revisado en octubre de 2006 y mayo de 2010, y las disposiciones estipuladas en el convenio jurídico. Las distintas partidas dentro de las diferentes categorías de gastos se describen en general a continuación. Todos los bienes y las obras necesarios para el proyecto, excepto los costos relacionados con la adquisición de tierras, el reasentamiento y la rehabilitación en el marco del PAR, independientemente de la fuente de financiamiento, deben adquirirse y contratarse de conformidad con los requisitos estipulados en el convenio de préstamo y según se describe más adelante. Los bienes cuyo costo se calcule en una suma inferior al equivalente de US\$300 000 por contrato, y las obras cuyo costo se calcule en una suma inferior al equivalente de US\$5 millones por contrato, pueden adquirirse y contratarse mediante contratos adjudicados en una licitación pública nacional, con sujeción a las disposiciones adicionales estipuladas en el convenio de préstamo. Los distintos métodos de adquisición o métodos de selección de consultores, la necesidad de precalificación, los costos previstos, los requisitos de examen previo y los plazos serán acordados entre la prestataria y el Banco en el Plan de Adquisiciones. El Plan de Adquisiciones se actualizará, al menos, una vez por año, o según sea necesario, a través del Sistema de Ejecución de Planes de Adquisiciones (SEPA) para reflejar las necesidades reales de ejecución del proyecto y las mejoras en la capacidad institucional.

2. ***Contratación de obras.*** La contratación de obras civiles en el marco de este proyecto incluiría, entre otras cosas, un contrato llave en mano para el mejoramiento de la PTAR Salitre (con precalificación), optimización del diseño y la construcción, y obras en el río para el control de inundaciones. Para la contratación se utilizarán los documentos estándar de licitación armonizados correspondientes para todas las licitaciones públicas internacionales (LPI) y nacionales (LPN), en caso de estar disponibles, o los documentos estándar de licitación del Banco, aprobados y adaptados a las necesidades del proyecto. Para las obras civiles más pequeñas cuyo costo se calcule en una suma inferior al equivalente de US\$350 000, se acordará con el Banco una invitación para cotizar mediante el procedimiento de comparación de precios.

3. ***Adquisición de bienes.*** La adquisición de bienes en el marco de este proyecto incluiría los bienes y equipos necesarios para la construcción de obras de control de inundaciones del río y actividades relacionadas. La adquisición se realizará mediante el uso de los documentos estándar de licitación armonizados para las LPI y LPN o los documentos estándar de licitación del Banco, aprobados y adaptados a las necesidades del proyecto. Para la adquisición de bienes de menor valor, cuyo costo se calcule en una suma inferior al equivalente de US\$50 000, se acordará con el Banco una invitación para cotizar mediante el procedimiento de comparación de precios. Se

pueden comprar computadoras, equipos de oficina, software y equipos conexos para el equipo encargado de la ejecución del proyecto de la CAR.

4. ***Selección de consultores.*** En el proyecto se requieren servicios de consultoría para los estudios definidos en el componente 3 de asistencia técnica; estudios relacionados con la posibilidad de usar el agua residual tratada en Salitre para riego en el distrito de riego La Ramada; servicios de capacitación; diseño de obras civiles y supervisión para los componentes 1 y 2; gestión y ejecución del proyecto; estudios y análisis especializados; campañas publicitarias, y otros servicios de asesoramiento técnico. Las listas finales de consultores para la prestación de servicios cuyo costo se calcule en una suma inferior al equivalente a US\$500 000 por contrato podrán estar conformadas exclusivamente por consultores nacionales, conforme a las disposiciones del párrafo 2.7 de las Normas sobre Consultores. En algunos campos especializados, se anticipa la participación de universidades, instituciones de investigación y ONG que reúnan los requisitos necesarios.

5. ***Empresas.*** Las solicitudes de propuestas armonizadas deben utilizarse en el caso de procesos competitivos. Se anticipa la adjudicación de la mayoría de los contratos para las empresas con el método de selección basada en la calidad y el costo (SBCyC). Las designaciones de consultores de tipos específicos, según se acordó previamente con el Banco en el Plan de Adquisiciones, podrán realizarse mediante el uso de los siguientes métodos de selección: a) selección basada en la calidad (SBC); b) selección conforme a un presupuesto fijo, especialmente para contratos de supervisión de obras; c) selección por el menor costo; d) selección basada en las aptitudes de los consultores, para contratos cuyo costo se calcule en una suma inferior al equivalente de US\$200 000, y, excepcionalmente, e) selección basada en una fuente única, en las circunstancias explicadas en el párrafo 3.9 de las Normas sobre Consultores y con sujeción a la aprobación previa del Banco.

6. ***Personas.*** Se contratarán consultores individuales para brindar servicios de asesoramiento técnico y de apoyo al proyecto, y se elegirán de acuerdo con lo dispuesto en la sección V de las Normas. La selección de consultores individuales basada en una fuente única debe realizarse en las circunstancias explicadas en el párrafo 5.4 de las Normas sobre Consultores y con sujeción a la aprobación previa del Banco.

7. ***Los procedimientos de adquisiciones y los documentos de licitación*** que se usarán para cada método de adquisición y los modelos de contratos para bienes adquiridos y obras contratadas se encuentran en el Manual operativo.

## **B. Evaluación de la capacidad del organismo para ejecutar la adquisición**

8. El equipo a cargo de la ejecución del proyecto de la CAR estará a cargo de las adquisiciones y de la gestión técnica de todo el proyecto. La evaluación de la capacidad de la CAR para llevar a cabo las adquisiciones según las normas del Banco Internacional de Reconstrucción y Fomento (BIRF) sobre adquisiciones y contratación de consultores señaló la necesidad de fortalecer la capacidad y brindar capacitación adicional. Conforme a dichas observaciones, se deberá realizar lo siguiente:

- Para licitaciones de grandes obras civiles, contratar un consultor con vasta experiencia en adquisiciones financiadas por el BIRF para asesorar sobre cuestiones relativas a las adquisiciones, en especial para la confección de documentos de licitación y la evaluación de ofertas antes de la entrada en vigor del proyecto.
- Participar en seminarios sobre políticas de adquisiciones del Banco (adquisiciones, lucha contra el fraude y la corrupción, transparencia; cumplido).
- Organizar un taller sobre adquisiciones antes de la licitación de la PTAR, para que el personal pertinente de la CAR se familiarice más profundamente con la precalificación, la elaboración de documentos de licitación y el manejo de la evaluación de las ofertas.

9. En julio de 2009, el especialista acreditado en materia de adquisiciones finalizó una evaluación sobre la capacidad de la CAR para ejecutar las acciones relativas a las adquisiciones del proyecto. Evaluación del riesgo general: Se identificó a la falta de experiencia de la CAR en materia de las normas de adquisiciones del Banco como el principal asunto y riesgo relacionado con la ejecución de estas actividades del proyecto. Se anticipa que las actividades en materia de adquisiciones serán complejas y de gran valor. La CAR contrató un consultor con vasta experiencia en los procedimientos de adquisiciones del Banco, y el personal de la CAR asistió a dos sesiones de capacitación en adquisiciones. Se anticipa que el personal de la CAR seguirá participando en seminarios y capacitaciones que también tratarán sobre las políticas del Banco relativas a la transparencia y la lucha contra el fraude y la corrupción. Si se consideran todas las circunstancias mencionadas con anterioridad y el gran valor de las adquisiciones en el marco de este proyecto, el riesgo general del proyecto se considera PROMEDIO, siempre y cuando la CAR mantenga la capacidad obtenida en materia de adquisiciones.

### **C. Plan de adquisiciones**

10. En la etapa de evaluación inicial, la prestataria confeccionó un plan de adquisiciones para la ejecución del proyecto, que brinda las bases para los métodos de adquisición. El 21 de mayo de 2010, el Banco recibió y examinó el borrador final. El plan estará disponible en la base de datos del proyecto y en el sitio web externo del Banco. El plan de adquisiciones se actualizará con el acuerdo del Banco una vez por año, o según sea necesario, para reflejar las necesidades reales de ejecución del proyecto y las mejoras en la capacidad institucional. Como parte de las políticas del Banco, la CAR suministrará la información contenida en el plan de adquisiciones inicial al **SEPA** dentro de los 30 días posteriores a la aprobación del proyecto por parte del Banco; actualizará el plan según las exigencias del Banco para reflejar el avance y las necesidades reales de la ejecución del proyecto, e inmediatamente después suministrará al SEPA la información contenida en el plan actualizado de adquisiciones.

### **D. Frecuencia de la supervisión de las adquisiciones**

11. Además de la supervisión de examen previo que se realizará desde las oficinas del Banco, la evaluación de la capacidad actual recomienda la realización de dos misiones durante el primer año de vigencia del proyecto y, siempre y cuando haya un buen desempeño en las adquisiciones, una misión anual para visitar el terreno y realizar un examen posterior de las medidas en materia de adquisiciones.

12. **Costos operativos.** Los costos operativos incluirán, básicamente, los costos de la ejecución del proyecto, según se acuerde con el Banco, tales como gastos relacionados con viajes del personal contratado en el marco del proyecto, gastos relacionados con capacitaciones y talleres, bienes fungibles de oficina, costos de alquiler de oficinas, comunicaciones y servicios públicos, equipos de oficina, combustible, operación y mantenimiento de vehículos, compra de materiales y publicaciones científicas, costos bancarios y de seguro, conexión a Internet y otros gastos de oficina en que no se hubiera incurrido si el proyecto no existiera.

13. **Otros.** Deben incluirse en el Manual operativo del proyecto los procedimientos de adquisiciones y los documentos de licitación (armonizados o no) que se utilizarán en cada método de adquisición, además de modelos de contratos para bienes y servicios de consultoría que han de adjudicarse. Todos los documentos de adquisiciones armonizados o estándar del Banco deben reflejar la última versión (actualizada), lo que incluye las políticas contra el fraude y la corrupción. La capacitación en adquisiciones del proyecto también se concentrará en estas políticas.

#### **E. Detalles de los mecanismos de adquisiciones respecto de LPI**

##### **14. Bienes, obras y servicios que no sean de consultoría**

| N.º de referencia | Descripción de la tarea                                                                   | Método de adquisición | Examen del Banco (previo o posterior) | Fecha de vencimiento de presentación de propuestas |
|-------------------|-------------------------------------------------------------------------------------------|-----------------------|---------------------------------------|----------------------------------------------------|
| 1                 | Construcción de obras de adecuación hidráulica del tramo A (Alicachín-Tunjuelo)           | LPI                   | Previo                                | Primer trimestre de 2011                           |
| 2                 | Construcción de obras de adecuación hidráulica del tramo B (Tunjuelo-Fucha)               | LPI                   | Previo                                | Cuarto trimestre de 2011                           |
| 3                 | Construcción de obras de adecuación hidráulica del tramo C (Fucha-Juan Amarillo)          | LPI                   | Previo                                | Cuarto trimestre de 2012                           |
| 4                 | Construcción de obras de adecuación hidráulica del tramo D (Juan Amarillo-Pte. La Virgen) | LPI                   | Previo                                | Segundo trimestre de 2013                          |
| 5                 | Diseño y construcción PTAR Salitre (contrato llave en mano)                               | LPI                   | Previo                                | Segundo trimestre de 2011                          |

a) Los contratos de LPI de bienes y servicios que no sean de consultoría con un costo estimado equivalente a US\$500 000 (o superior) por contrato, los contratos de obras civiles con un costo estimado de US\$5 millones (o superior) y todas las contrataciones directas estarán sujetos al examen previo del Banco.

### 15. Servicios de consultoría

b) Lista de tareas de consultoría con lista final de selección de empresas internacionales. Los servicios de consultoría cuyo costo estimado sea de US\$500 000 (o superior) tendrán listas finales de selección empresas internacionales. Los contratos de consultoría cuyo costo estimado sea de US\$350 000 (o superior) estarán sujetos al examen previo del Banco.

| N.º de referencia | Descripción de la tarea                                                                          | Método de selección | Examen del Banco (previo o posterior) | Fecha de vencimiento de presentación de propuestas |
|-------------------|--------------------------------------------------------------------------------------------------|---------------------|---------------------------------------|----------------------------------------------------|
| 1                 | Interventoría Construcción Adecuación hidráulica del tramo A                                     | SBCyC               | Previo                                | Cuarto trimestre de 2010                           |
| 2                 | Interventoría Construcción Adecuación hidráulica del tramo C                                     | SBCyC               | Previo                                | Tercer trimestre de 2011                           |
| 3                 | Interventoría Construcción Adecuación hidráulica del tramo D                                     | SBCyC               | Previo                                | Primer trimestre de 2013                           |
| 4                 | Interventoría Diseño y construcción PTAR Salitre                                                 | SBC                 | Previo                                | Primer trimestre de 2011                           |
| 5                 | Plan Maestro para el Manejo Integrado del Agua en la Cuenca del Río Bogotá                       | SBCyC               | Previo                                | Segundo trimestre de 2012                          |
| 6                 | Estudio de Manejo de los Biosólidos de las Plantas de Aguas Residuales de Bogotá                 | SBCyC               | Previo                                | Cuarto trimestre de 2011                           |
| 7                 | Estudio de Ingeniería para el Mejoramiento Ambiental y Mantenimiento de las Obras del Río Bogotá | SBCyC               | Previo                                | Cuarto trimestre de 2011                           |

## Anexo 9: Análisis económico y financiero

### COLOMBIA: Proyecto de Adecuación Hidráulica y Recuperación Ambiental del Río Bogotá

#### Resumen

1. El Proyecto de Adecuación Hidráulica y Recuperación Ambiental del Río Bogotá se considera económicamente factible, con una tasa de rentabilidad interna (TRI) prevista de alrededor del 17%<sup>14</sup>. Si se emplea una tasa de descuento del 10%, el valor neto actualizado (VNA) estimado del proyecto es US\$249 millones. Si la TRI supera el costo del capital, como se indica en la tasa de descuento, el proyecto se considera económicamente factible. El VNA brinda una estimación de la magnitud de los beneficios que se anticipan con el proyecto. Los principales beneficios provienen de la disposición a pagar por la mejora del entorno del río Bogotá con una serie de parques multifuncionales, como también por la reducción de los daños causados por las inundaciones a lo largo del río. Se contrató una firma consultora para que elaborara un análisis económico detallado. En este anexo se presenta un resumen de dicho estudio, junto con un análisis complementario realizado por el equipo del Banco. También se realizó un análisis económico de ingeniería rápido de costo mínimo para verificar que las inversiones fueran eficientes desde el punto de vista económico.

2. Los resultados de la evaluación financiera de la CAR y la EAAB demuestran lo siguiente: i) la CAR tiene capacidad financiera para proporcionar fondos de contrapartida para la ejecución del proyecto y reembolsar el préstamo propuesto, además de sostener el futuro mantenimiento de las obras del río del componente 2, y ii) la empresa de abastecimiento de agua de Bogotá, EAAB, puede sostener financieramente la operación y los costos de mantenimiento de la PTAR Salitre.

3. Para el reembolso de la CAR al Banco Mundial, se llevó a cabo una evaluación integral de sensibilidad y riesgo para examinar las diferentes opciones de vencimientos. La intención de la CAR es utilizar solo los fondos específicos del FIAB para reembolsar el préstamo al Banco. Con el plan conservador de amortización del préstamo elegido, la CAR tiene una gran probabilidad de no enfrentar una escasez de liquidez temporaria durante el período del reembolso.

4. El análisis financiero de la EAAB como entidad se llevó a cabo con la presunción de que esta es responsable de los costos de operación y mantenimiento de las PTAR Salitre y (en el futuro) Canoas. El análisis supone que la EAAB cubre todos los costos de inversión y operación para el abastecimiento de agua y la recolección de aguas residuales, inclusive los costosos interceptores de aguas residuales. El análisis indica que la EAAB tiene solidez financiera y que será capaz de sostener la operación de ambas plantas con tan solo aumentos promedio moderados en las tarifas.

---

<sup>14</sup> Econometría Consultores, contratado por el Banco Mundial, se encargó de realizar el análisis económico del proyecto. El estudio lleva el título de *Evaluación Económica del Proyecto de Recuperación Ambiental y Adecuación Hidráulica del Río Bogotá*, octubre 2009. Bogotá, Colombia.

5. La estructura del anexo es la siguiente:

| <b>A. Análisis económico</b>           | <b>B. Análisis financiero</b>     | <b>C. Análisis de las tarifas</b>   |
|----------------------------------------|-----------------------------------|-------------------------------------|
| A.1. Costo-beneficio                   | B.1. La CAR como entidad          | C.1. Sistema de tarifas en Colombia |
| A.2. Eficacia en función de los costos | B.2. El FIAB como fondo de la CAR | C.2. Tarifas en Bogotá              |
|                                        | B.3. La EAAB como entidad         |                                     |

## **A. ANÁLISIS ECONÓMICO DEL PROYECTO**

6. El objetivo del proyecto es transformar al río Bogotá en un activo ambiental para la región metropolitana de Bogotá mejorando la calidad del agua, reduciendo los riesgos de inundaciones y creando áreas multifuncionales a lo largo del río. Se usaron dos enfoques para determinar la viabilidad económica del proyecto: i) análisis de costos y beneficios y ii) análisis de la eficacia en función de los costos.

### **A.1. Análisis de costos y beneficios**

7. Se utilizaron los costos económicos para realizar este análisis. Los flujos de fondos financieros se transformaron en flujos de fondos económicos mediante el uso de los siguientes elementos: i) factores de conversión aplicados a los costos de inversión y operación, para eliminar distorsiones del mercado, y ii) medición del impacto en el bienestar de los hogares dentro de la zona de influencia del proyecto. El flujo de costos y beneficios se midió en un período de 40 años, y los costos y beneficios se expresaron en términos de precios constantes de junio de 2009.

8. **Costos.** El flujo de costos consta de los costos de inversión y operación. La inversión del proyecto incluye: i) mejoramiento y ampliación de la planta de tratamiento Salitre, ii) obras para el control de inundaciones y restauración del río, y iii) gestión de proyectos y estudios adicionales. La EAAB tiene inversiones adicionales en ejecución que no son parte del proyecto pero que son necesarias para obtener los beneficios anticipados. Estas inversiones incluyen los interceptores que conducirán las aguas residuales sin tratar de Bogotá a Canoas y el equipo de bombeo que bombeará las aguas residuales hasta la planta Canoas. Dos de los tres sectores de intercepción están completos y los equipos de bombeo de Tunjuelo-Canoas y Canoas se adquirirán a la brevedad. Se anticipa que las inversiones de la EAAB iniciarán sus operaciones cerca del año 2012, y se construirán independientemente del proyecto. Por lo tanto, el caso de referencia no incluye las obras de la EAAB, ya que se consideran costos no recuperables.

9. La vida útil de cada componente se supone que es la siguiente: i) obras civiles para Salitre y diques del río: más de 40 años; ii) equipos eléctricos y mecánicos para Salitre: revisión cada 12 años (30% del costo inicial) y reemplazo cada 25 años. Los costos de operación y mantenimiento de la planta Salitre se consideraron con y sin la ejecución del proyecto. También se consideraron estos costos para las obras del río.

10. Todos los costos se desglosaron en los siguientes componentes: mano de obra (calificada y no calificada), equipos (nacionales o importados), electricidad y otros. Los costos financieros

se transformaron en costos económicos mediante factores de conversión para eliminar las distorsiones de mercado creadas por impuestos, aranceles y subsidios. El costo económico del proyecto es menor que su costo financiero debido a los impuestos y aranceles que se cobran en Colombia.

11. **Beneficios.** Se anticipa que el proyecto generará los siguientes beneficios:

i) *Mejora de la calidad de agua del río:* En la actualidad, el agua del río en la cuenca media está muy contaminada. Con este proyecto, la planta Salitre se mejorará y ampliará de la actual planta de tratamiento primario, con un caudal de 4 metros cúbicos/segundo, a una planta de tratamiento secundario para un caudal de 8 metros cúbicos/segundo, la cual mejorará la calidad de agua a un parámetro de clase IV, apto para uso agrícola y ganadero sin restricciones.

ii) *Reducción de los daños producidos por las inundaciones:* El nivel actual de protección contra inundaciones a lo largo del río Bogotá se calcula que es del orden de los 10 a 20 años. Con el proyecto, se anticipa que se logrará una protección contra inundaciones para un período de retorno de 100 años, como mínimo.

iii) *Recuperación ambiental a lo largo de 68 kilómetros del río:* Con el proyecto se recuperarán ocho superficies multifuncionales a lo largo del río, lo que creará un hábitat ecológico y espacios públicos.

12. Los beneficios económicos se calcularon según dos métodos: i) encuesta de disposición a pagar, o valoración contingente, para medir las mejoras ambientales, y ii) estimaciones de costos evitados debido a la reducción en las inundaciones. El diseño y la aplicación de los enfoques se llevó a cabo con sumo cuidado para evitar el doble conteo entre los dos beneficios. Las fuentes de datos para medir los beneficios económicos son:

- la *encuesta de valoración contingente*, que fue realizada en más de 1000 hogares de la zona metropolitana de Bogotá y generó datos sobre la disposición a pagar las mejoras ambientales a lo largo de la cuenca media del río;
- los datos sobre *los costos evitados por daños de inundaciones*, que se recogieron por medio de i) la Dirección de Prevención y Atención de Emergencias (DPAE) de Bogotá; ii) encuestas a grupos de discusión en las poblaciones afectadas por inundaciones en los últimos tres años; iii) la CAR y la EAAB, y iv) la base de datos del catastro del Gobierno de Bogotá Distrito Capital.

13. **Beneficios del estudio de valoración contingente.** Como se muestra a continuación, el estudio demuestra que los hogares están dispuestos a pagar en promedio US\$3,01 mensuales<sup>15</sup> por las mejoras ambientales a lo largo del río. Los beneficios totales descontados, a una tasa de descuento del 10%, a lo largo del período de 40 años del proyecto, se calculan en US\$642 millones. El aumento estimado de tarifas en los hogares necesario para la operación y el

---

<sup>15</sup> Econometría Consultores, *Evaluación económica de la adecuación hidráulica y recuperación ambiental de la cuenca media del río Bogotá*, noviembre de 2009. Bogotá, Colombia.

mantenimiento del tratamiento secundario en Salitre se calcula en alrededor de US\$1,50 mensuales, lo que significa que hasta los estratos más bajos estarían dispuestos a financiar los beneficios del proyecto.

| Estrato económico                     | Disposición a pagar |                | % de población |
|---------------------------------------|---------------------|----------------|----------------|
|                                       | CO\$/hogar/2 meses  | US\$/hogar/mes |                |
| Estrato 1 y 2 (nivel de ingreso bajo) | 6519                | 1,65           | 43,6%          |
| Estrato 3 (nivel de ingreso medio)    | 9376                | 2,46           | 36,3%          |
| Estrato 4, 5 y 6                      | 28 139              | 7,03           | 20,1%          |
| Promedio                              | 11 879              | 3,01           |                |

14. Se tomaron muchas precauciones para garantizar que los resultados de la encuesta fueran confiables. Primero, se realizaron entrevistas a grupos de discusión para perfeccionar la presentación del proyecto y el cuestionario. La pregunta sobre la disposición a pagar se redactó de modo de generar una respuesta válida y se formuló teniendo en cuenta las siguientes condiciones: i) el proyecto ya estaba en marcha pero necesitaba del apoyo público (en términos de disposición a pagar) para poder continuar; ii) el encuestado pagaría un monto adicional seleccionado en su factura de agua para cubrir el proyecto, y iii) el encuestado tenía la opción de no pagar por el proyecto.

15. El estudio también midió la percepción general del público sobre el río Bogotá y la percepción sobre la necesidad del proyecto. La contaminación del río Bogotá se identificó como el problema ambiental más importante que enfrenta la ciudad en todos los estratos socioeconómicos, seguido del tratamiento de residuos sólidos, la calidad del aire, la congestión de tránsito y los ruidos. El 95% de los encuestados consideraron que la contaminación del río Bogotá es un problema grave para la ciudad, pero solo un 2,7% indicó que afectaba directa y concretamente a su familia. Por lo tanto, la conclusión general es que los ciudadanos de Bogotá tienen un gran sentido de custodia del medio ambiente del río Bogotá.

16. **Beneficios de los costos evitados de inundaciones.** Los beneficios se calcularon mediante el enfoque de costos evitados por daños, el cual mide los costos de los daños de las inundaciones que se anticipa que el proyecto evitará. Este cálculo corresponde a la diferencia entre los costos de los daños en dos escenarios: *con* y *sin* la ejecución del proyecto. El daño provocado por las inundaciones varía según su intensidad, como consecuencia del inadecuado drenaje de aguas pluviales o del desbordamiento del río (o de ambos). Uno de los impactos del proyecto consistirá en bajar el nivel de las aguas del río Bogotá, lo que debería reducir en gran medida el riesgo de desbordamiento en los afluentes urbanos (Tunjuelo y Fucha) y facilitar el drenaje general de las aguas pluviales. La DPAE, la CAR y la EAAB brindaron la información que ayudó a trazar los mapas de inundaciones existentes.

17. Las zonas más propensas a sufrir inundaciones se clasificaron en tres categorías, según su riesgo: alto, medio y bajo. La DPAE define el nivel de riesgo según la gravedad de las inundaciones, que se basa en la intensidad (duración de la inundación y nivel de las aguas) y el

período de retorno. En el cuadro que figura a continuación, se muestra el criterio que se utilizó para la clasificación de riesgo. Las características y la cantidad de propiedades de cada zona se calcularon usando la base de datos del catastro de Bogotá.

| <b>Zona</b>  | <b>Población de la zona</b> | <b>Gravedad</b> | <b>Nivel de las aguas</b> | <b>Período de retorno</b> | <b>Duración</b> |
|--------------|-----------------------------|-----------------|---------------------------|---------------------------|-----------------|
| Riesgo alto  | 11 328                      | Alta            | > 0,5 m                   | < 10 años                 | > 3 días        |
| Riesgo medio | 88 662                      | Alta            | > 0,5 m                   | Entre 10 y 100 años       | 0 a 3 días      |
| Riesgo bajo  | 25 397                      | Baja            | < 0,5 m                   | > 100 años                | 0 a 3 días      |
| <b>Total</b> | <b>125 387</b>              |                 |                           |                           |                 |

18. El costo de los daños se calculó con información histórica sobre los daños causados por inundaciones en los tres años anteriores. La información se recopiló de manera directa a través de encuestas realizadas a la población afectada. Los daños se clasificaron en ocho niveles, según el alcance de los daños, y a cada nivel se le asignó un costo, según los resultados de la encuesta, de la siguiente manera:

| <b>Nivel de daños</b> | <b>Consecuencias</b>                                                           | <b>Estimaciones de daños (en US\$)</b> | <b>Nivel de daños</b> | <b>Consecuencias</b>                                           | <b>Estimaciones de daños (en US\$)</b> |
|-----------------------|--------------------------------------------------------------------------------|----------------------------------------|-----------------------|----------------------------------------------------------------|----------------------------------------|
| 1                     | Retrasos de más de 10 minutos en viajes, 15 días al año                        | \$8,6                                  | 5                     | Nivel 4 más daños estructurales menores a viviendas            | \$328                                  |
| 2                     | Nivel 1 más pérdida de bienes o daños a los bienes                             | \$114                                  | 6                     | Nivel 5 más daños estructurales importante y pérdida de bienes | \$518                                  |
| 3                     | Nivel 2 más hasta 3 días de trabajo perdidos                                   | \$147                                  | 7                     | Nivel 6 más la necesidad de buscar refugio                     | \$668                                  |
| 4                     | Nivel 3 más 7 días de pérdida de asistencia a la escuela debido a enfermedades | \$237                                  | 8                     | Nivel 7 más daños estructurales graves                         | \$4268                                 |

19. Resultó imposible realizar un modelo exacto de los efectos acumulados del proyecto, debido a la complicada interacción entre el fortalecimiento de los diques (lo que reduce la probabilidad de desbordamientos), la disminución del nivel de las aguas debido a mejoras en el río (lo que facilita el drenaje de los afluentes y reduce la probabilidad de desbordamientos) y las mejoras en la recolección y el bombeo del drenaje de aguas pluviales (lo que agiliza el drenaje urbano). Por lo tanto, se utilizó la opinión de expertos para diseñar el cuadro siguiente, en el que se resume la reducción en la frecuencia y magnitud de los daños que causarían las inundaciones en el futuro.



| Situación                   | Inundación anual | Inundaciones en 10 años | Inundaciones en 100 años | Inundaciones en 500 años |
|-----------------------------|------------------|-------------------------|--------------------------|--------------------------|
| <b>Zona de riesgo alto</b>  |                  |                         |                          |                          |
| Con el proyecto             | NIVEL 4          | NIVEL 6                 | NIVEL 7                  | NIVEL 8                  |
| Sin el proyecto             | NIVEL 1          | NIVEL 4                 | NIVEL 6                  | NIVEL 7                  |
| <b>Zona de riesgo medio</b> |                  |                         |                          |                          |
| Con el proyecto             | NIVEL 1          | NIVEL 4                 | NIVEL 6                  | NIVEL 7                  |
| Sin el proyecto             | NIVEL 0          | NIVEL 1                 | NIVEL 4                  | NIVEL 6                  |
| <b>Zona de riesgo bajo</b>  |                  |                         |                          |                          |
| Con el proyecto             | NIVEL 0          | NIVEL 2                 | NIVEL 4                  | NIVEL 6                  |
| Sin el proyecto             | NIVEL 0          | NIVEL 0                 | NIVEL 2                  | NIVEL 4                  |

20. Para calcular la reducción general en los daños producidos por inundaciones, se combinó la reducción en los niveles de daños, la frecuencia de los eventos y el nivel demográfico de cada zona. La reducción anual promedio en los daños producidos por inundaciones por hogar se calcula de la siguiente manera: i) US\$240 para las zonas de riesgo alto; ii) US\$33,4 para las zonas de riesgo medio, y iii) US\$13 para las zonas de riesgo bajo. El promedio anual total de los costos evitados se calcula que será de US\$6,4 millones por año en 2013, con un incremento promedio anual del 1,3% para tener en cuenta el aumento en los valores de las viviendas. Se estima que el VNA de los beneficios de las obras de control de inundaciones, con una tasa de descuento del 10%, es de aproximadamente US\$54 millones.

21. **Resumen de costos y beneficios.** Se supone que los beneficios del proyecto se producirán de la siguiente manera: i) los beneficios del control de las inundaciones comenzarán en 2013 y ii) los beneficios de las mejoras ambientales a lo largo de la cuenca media del río empezarán en 2013 con el 30% del total de los beneficios, en 2014 con el 70% y en 2015 con el 100%. Los siguientes escenarios se analizaron con una tasa de descuento del 10%:

- I. Caso de referencia: únicamente costos del proyecto, con consideración de los beneficios ambientales y del control de inundaciones.
- II. Caso de referencia con la construcción de los interceptores de la EAAB en marcha.
- III. Caso de referencia más interceptores de la EAAB y estación de bombeo Canoas (sin incluir la planta de tratamiento Canoas, ya que no generará beneficios para la zona del proyecto).
- IV. Solo inversiones de control de inundaciones del componente 2.

| Escenarios                                                                          | VNA de los flujos (en millones de US\$) |            |                |       |
|-------------------------------------------------------------------------------------|-----------------------------------------|------------|----------------|-------|
|                                                                                     | Costos                                  | Beneficios | Beneficio neto | TRI   |
| 1. Escenario de referencia                                                          | 447                                     | 696        | 249            | 16,9% |
| 2. Caso de referencia con la construcción de los interceptores de la EAAB en marcha | 642                                     | 696        | 53             | 10,9% |
| 3. Caso de referencia con todas las obras de la EAAB                                | 805                                     | 696        | (109)          | 8,4%  |
| 4. Solo obras de control de inundaciones                                            | 108                                     | 54         | (53)           | 5,2%  |

22. El escenario de referencia muestra un beneficio neto de US\$249 millones y una tasa de rentabilidad interna del 16,9%. Debido a que no está claro si las inversiones en marcha de la EAAB deben considerarse costos no recuperables, se analizó el escenario 2, que representa un caso de punto de equilibrio con una tasa de descuento del 10%. En el escenario 3, que es un caso hipotético, se tuvieron en cuenta todos los costos del megaproyecto de la EAAB (excepto Canoas). Aunque no se tuvieron en cuenta para el análisis, se prevé que, a medida que la conciencia ambiental y el desarrollo económico aumenten con el tiempo en Bogotá, sus residentes valorarán más los servicios ambientales ofrecidos por el río Bogotá.

23. El escenario 4, que solo tiene en cuenta el control de inundaciones, muestra un beneficio neto negativo y una TRI de tan solo 5,2%, lo que indica que, en las circunstancias actuales, las obras de control de inundaciones por sí solas no son viables desde el punto de vista económico. Sin embargo, las obras de control de inundaciones forman una actividad en el componente 2 que también incluye la recuperación ambiental del río. Las obras de control de inundaciones permitirán, potencialmente, un desarrollo económico mayor y más intensivo a lo largo del río que no se tuvo en cuenta en el análisis económico. Asimismo, debido a las limitaciones en materia de datos y la complejidad para crear un modelo de las inundaciones, el análisis del control de las inundaciones debe considerarse como una aproximación.

24. Además, se llevó a cabo una simulación de Monte Carlo, donde todas las variables principales (tasa de descuento, costos, beneficios, plazo y tipo de cambio) se variaron al azar en más de 10 000 simulaciones. Los resultados se muestran a continuación de manera gráfica e indican un alto nivel de solidez.

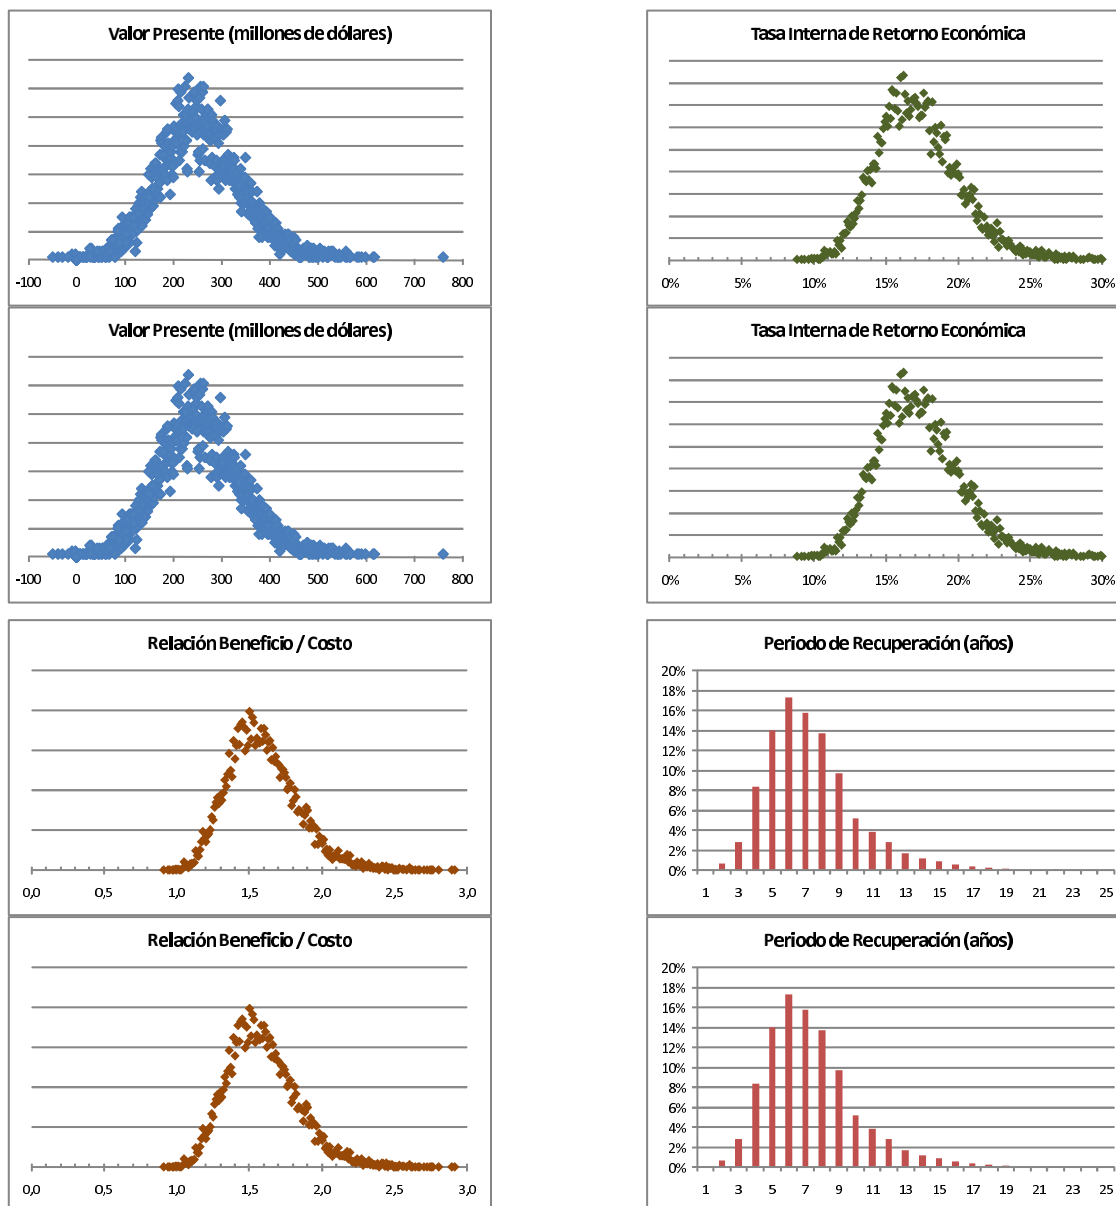

Fuente: Construcción propia Econometría S.A.

## A.2. Análisis de la eficacia en función de los costos

25. A lo largo de los años, se han realizado por lo menos cinco estudios o exámenes de planes maestros para el tratamiento de aguas residuales en Bogotá<sup>16</sup> y se analizaron tres alternativas para las plantas de tratamiento: i) una planta, ii) dos plantas y iii) tres plantas. Para cada una de estas alternativas, se propusieron diversos niveles de tratamiento y programas de aplicación en etapas. Cualquiera de las tres opciones, si se ejecuta adecuadamente, tiene la posibilidad de generar beneficios ambientales importantes en comparación con la situación actual. La selección de una alternativa particular depende de consideraciones ambientales, económicas, financieras y legales que tienen lugar en un contexto institucional y político dinámico.

26. Desde 2004, existe una clara estrategia nacional para limpiar el río Bogotá, la cual se basa en un enfoque de dos plantas en Salitre y Canoas. Esta estrategia está inmersa en un complejo marco jurídico y normativo en Colombia, y las inversiones de la EAAB para ejecutar la estrategia (sin financiamiento del Banco) en Bogotá ya han comenzado. Para confirmar la racionalidad de este enfoque, en la etapa de la nota sobre la idea del proyecto, se llevó a cabo un análisis rápido de la eficacia en función de los costos, y se demostró que el enfoque de dos plantas se justificaba desde el punto de vista económico, en particular si se tienen en cuenta los costos económicos no recuperables.

## **B. Análisis financiero**

27. *Contexto institucional.* La Ley 99 (agosto de 1993), ley constitutiva del sistema de gestión ambiental de Colombia, establece que los municipios deben transferir a las autoridades ambientales respectivas entre un 15% y un 25,9% de los ingresos resultantes del impuesto predial. También establece que, si el municipio tiene una población superior al millón de habitantes, por lo menos el 50% de los fondos transferidos debe usarse para mejoras ambientales en el municipio respectivo. En el caso de Bogotá, el Gobierno del Distrito transfiere un 15% a la CAR, y la mitad debe utilizarse en Bogotá Distrito Capital.

28. En 2005<sup>17</sup>, el Consejo Directivo de la CAR creó el FIAB como un mecanismo para gestionar los ingresos del impuesto predial que recibe la CAR y que serán usados en el perímetro urbano de Bogotá Distrito Capital (es decir, la mitad del 15% que Bogotá le transfiere a la CAR). El período de duración de este fondo es indefinido, por decisión del Consejo Directivo de la CAR.

29. En 2007<sup>18</sup>, el Consejo Directivo de la CAR limitó el alcance del FIAB y determinó que la mitad de sus fondos, equivalente a la mitad del 15% de los ingresos del impuesto predial, debe usarse para apoyar el megaproyecto de aguas residuales del río Bogotá. En noviembre de 2007, se establecieron las responsabilidades de la CAR y la EAAB en cuanto a la ejecución del megaproyecto en el Convenio 171, que lleva las firmas de la EAAB, la CAR y la SDA de

---

<sup>16</sup> Los estudios y sus recomendaciones son los siguientes: i) Corporación para el Desarrollo de las Microempresas (CDM) (1974): una planta en Canoas; ii) Biwater (1989): tres plantas (Salitre, Fucha y Tunjuelo); iii) Estudios y Proyectos Ambientales y Mecánicos (EPAM) (1993): tres plantas; iv) Foster Wheeler (2001): tres plantas, y iv) EAAB (2003): dos plantas.

<sup>17</sup> Acuerdo CAR n.º 28, del 31 de agosto de 2005

<sup>18</sup> Acuerdo CAR n.º 15, del 19 de junio de 2007.

Bogotá. Las responsabilidades de la CAR incluyen: i) el mejoramiento y la ampliación de la PTAR Salitre para tratar las aguas residuales de las microcuencas de Salitre, Torca y Jaboque, para luego conducirlas y descargarlas en el río Bogotá y posiblemente en el distrito de riego La Ramada, y ii) la ejecución de las obras del río Bogotá. Las responsabilidades de la EAAB incluyen: i) ejecutar todo el alcantarillado requerido; ii) operar las PTAR en El Salitre y Canoas, y iii) el Distrito/la EAAB en coordinación con el Gobierno nacional, compartirán la responsabilidad financiera de la PTAR Canoas. En el Convenio 171, se establecieron los siguientes recursos para pagar las inversiones: i) fondos del FIAB; ii) tarifas de tasas retributivas que se cobran a quienes contaminan en Bogotá Distrito Capital para compensar por los daños ambientales; iii) contribuciones del Gobierno de Bogotá Distrito Capital, según la Ley 715 de 2001; iv) tarifas de alcantarillado, y v) otros recursos que las partes acuerden.

30. *Alcance del análisis financiero.* Este análisis financiero examina: i) la capacidad financiera de la CAR para hacerse cargo del préstamo propuesto y para mantener y operar las obras del río, y ii) la viabilidad financiera de la EAAB tras asumir la responsabilidad de operar las PTAR Salitre y Canoas. Este análisis también analiza el riesgo financiero debido a posibles cambios en las variables principales.

31. *Metodología.* La capacidad financiera de la CAR se evaluó desde dos perspectivas: a) la CAR como entidad, incluida la ejecución no solo del proyecto, sino también de las demás inversiones previstas y los planes de financiamiento relacionados, y b) la viabilidad financiera del FIAB para realizar los aportes locales para el proyecto y reembolsar el préstamo al Banco.

32. El análisis financiero de la EAAB se llevó a cabo considerando todos los planes de inversión previstos, las fuentes de financiamiento y los requisitos financieros para operar la infraestructura financiada con los fondos del proyecto que está bajo su responsabilidad. Esta evaluación se complementó con un análisis de sensibilidad de posibles aumentos en las tarifas de las aguas residuales para compensar los costos operativos de estas plantas.

33. Los análisis de la CAR y la EAAB se basaron en los estados financieros auditados correspondientes a los dos últimos ejercicios y se completaron con un modelo financiero preparado para que el equipo del Banco pudiera prever la situación financiera de ambos organismos. Los supuestos para la proyección incluyeron las directrices dadas por el Gobierno nacional en materia de proyecciones macroeconómicas, la legislación actual sobre el origen y la aplicación de los fondos de la CAR y proyecciones de algunas variables realizadas por la CAR y la EAAB, según se explica en mayor profundidad a continuación. La proyección se probó con un análisis exhaustivo de sensibilidad y riesgo para medir el impacto financiero de los cambios en variables seleccionadas.

34. El análisis se complementó con una presentación del régimen tarifario en Colombia, las tarifas actuales en la EAAB en comparación con otras empresas de servicios públicos importantes en Colombia y el impacto del aumento en las tarifas de alcantarillado en la EAAB.

### **B.1. Análisis financiero de la CAR como entidad**

35. El análisis financiero de la CAR se basó en i) estados financieros auditados históricos correspondientes a los últimos dos ejercicios, ii) el presupuesto de 2009 y iii) proyecciones a 25 años. Los ingresos de la CAR provienen principalmente de *tarifas ambientales*, las que están formadas por un porcentaje (del 15% al 25,9%) del impuesto predial<sup>19</sup> o un porcentaje (del 1,5‰ a 2,5‰) del valor de las propiedades que se utilizan para calcular el impuesto predial, según el municipio. Los cuadros de la página siguiente muestran los ingresos y gastos operativos de la CAR.

36. Como se muestra en el cuadro que se halla a continuación, la CAR utilizó alrededor del 45% de los ingresos para gastos operativos y el 15% para inversiones sociales, lo que deja un remanente del 40% para otras inversiones ambientales y representa unos US\$22 millones anuales. La legislación actual establece que algunos de los ingresos de la CAR tienen destinos específicos y no pueden utilizarse para gastos operativos. Las transferencias del sector eléctrico deben distribuirse de la siguiente manera: i) 20% para el fondo ambiental que gestiona el Gobierno nacional; ii) 70% para inversiones específicas ejecutadas por la CAR, y iii) el 10% restante se utiliza para cubrir gastos operativos. La mitad de los ingresos del impuesto predial de Bogotá Distrito Capital se asignan al FIAB. Los cargos por riego compensan los gastos administrativos de los distritos de riego. Los ingresos de las tarifas redistributivas son para las inversiones; todos los otros ingresos pueden asignarse para gastos operativos o para el fondo general de inversión de la CAR.

| <b>INGRESOS (en millones de CO\$)</b>                                          | <b>2007</b>    | <b>2008</b>    | <b>Presupuesto 2009</b> |
|--------------------------------------------------------------------------------|----------------|----------------|-------------------------|
| Tarifas ambientales                                                            |                |                |                         |
| 15% del impuesto predial de Bogotá Distrito Capital                            | 111 222        | 114 058        | 129 172                 |
| 0,15% del valor de la propiedad en municipios fuera de Bogotá Distrito Capital | 20 028         | 21 254         | 28 558                  |
| Total de tarifas ambientales                                                   | 131 250        | 135 312        | 157 730                 |
| Cargos por riego (Distrito de La Ramada y Fúquene)                             | 2969           | 3813           | 4004                    |
| Parques                                                                        | 886            | 1013           | 1102                    |
| Tarifas retributivas para quienes contaminan                                   | 550            | 1025           | 25 592                  |
| Derechos de agua                                                               | 75             | 45             | 147                     |
| Licencias, permisos y EA                                                       | 269            | 354            | 600                     |
| Laboratorio ambiental                                                          | 63             | 65             | 117                     |
| Transferencias del sector eléctrico                                            | 7757           | 8258           | 9468                    |
| Sanciones                                                                      | 186            | 447            | 468                     |
| Otros                                                                          | 17             | 262            | 275                     |
| <b>TOTAL DE INGRESOS</b>                                                       | <b>144 021</b> | <b>150 594</b> | <b>199 503</b>          |
| Tarifas ambientales                                                            | 91%            | 90%            | 79%                     |
| Transferencias del sector eléctrico                                            | 5%             | 5%             | 5%                      |
| Otros                                                                          | 3%             | 5%             | 14%                     |

| <b>GASTOS OPERATIVOS (en millones CO\$)</b> | <b>2007</b>   | <b>2008</b>   | <b>Presupuesto 2009</b> |
|---------------------------------------------|---------------|---------------|-------------------------|
| Administrativos                             | 47 940        | 58 790        | 57 854                  |
| Operativos                                  | 11 351        | 15 750        | 16 538                  |
| Inversión social                            | 14 101        | 20 093        | 21 189                  |
| <b>TOTAL DE GASTOS</b>                      | <b>73 392</b> | <b>94 634</b> | <b>95 581</b>           |

<sup>19</sup> La Constitución Política de Colombia estipula que el porcentaje debe ser superior al 15% e inferior al 25,9% del impuesto predial que se cobra en el municipio.

37. En la siguiente página, se incluye un resumen de los estados financieros e indicadores financieros de la CAR. Los resultados financieros de la CAR correspondientes a los últimos dos ejercicios y al presupuesto 2009 muestran una situación financiera sólida: un beneficio neto de hasta un 60% de los ingresos; indicadores operativos inferiores a 0,65; gastos en concepto de intereses inferiores al 2% de los ingresos; relación entre deuda y capital de hasta 0,19; generación de ingresos propios superiores a cinco veces el servicio de la deuda, y saldo de la deuda inferior al 0,7 de los ingresos operativos. Debido a su buen desempeño, la CAR obtuvo una calificación excelente en la evaluación del riesgo que realizó Duff & Phelps en 2007<sup>20</sup> y una opinión favorable de la máxima autoridad fiscal de Colombia, la CGR.

| <b>ESTADO DE RESULTADOS</b><br>(en millones de CO\$)                           | <b>2007</b>   | <b>2008</b>   | <b>Valor estimado</b><br><b>2009</b> |
|--------------------------------------------------------------------------------|---------------|---------------|--------------------------------------|
| INGRESOS                                                                       | 144 021       | 150 594       | 199 503                              |
| GASTOS OPERATIVOS                                                              | 73 392        | 94 634        | 95 581                               |
| Utilidades antes de intereses, impuestos, depreciación y amortización (EBITDA) | 70 629        | 55 960        | 103 922                              |
| Depreciación y reservas                                                        | 9926          | 3583          | 4907                                 |
| Utilidades antes de intereses e impuestos                                      | 60 703        | 52 377        | 99 016                               |
| Intereses                                                                      | 2607          | 2352          | 2420                                 |
| Diferencias en el tipo de cambio                                               | 10 222        | 23 891        | -                                    |
| Otros ingresos no operativos menos gastos                                      | 50 676        | 57 547        | 29 708                               |
| <b>BENEFICIO NETO</b>                                                          | <b>98 551</b> | <b>83 680</b> | <b>126 303</b>                       |

| <b>BALANCE GENERAL</b><br>(en millones de CO\$) | <b>2007</b>    | <b>2008</b>    | <b>Valor estimado</b><br><b>2009</b> |
|-------------------------------------------------|----------------|----------------|--------------------------------------|
| <b>ACTIVOS</b>                                  |                |                |                                      |
| Activo corriente                                | 331 489        | 403 296        | 478 766                              |
| Activos a largo plazo                           | 331 584        | 260 253        | 306 419                              |
| <b>TOTAL DE ACTIVOS</b>                         | <b>663 073</b> | <b>663 549</b> | <b>785 185</b>                       |
| <b>PASIVO</b>                                   |                |                |                                      |
| Pasivo corriente                                | 13 625         | 16 146         | 17 926                               |
| Pasivos a largo plazo                           | 91 847         | 89 855         | 83 408                               |
| <b>TOTAL DEL PASIVO</b>                         | <b>105 472</b> | <b>106 000</b> | <b>101 334</b>                       |
| <b>PATRIMONIO NETO</b>                          | <b>557 601</b> | <b>557 548</b> | <b>683 851</b>                       |
| <b>TOTAL DEL PASIVO MÁS PATRIMONIO NETO</b>     | <b>663 073</b> | <b>663 549</b> | <b>785 185</b>                       |

| <b>INDICADORES FINANCIEROS</b>                      | <b>2007</b> | <b>2008</b> | <b>2009</b> |
|-----------------------------------------------------|-------------|-------------|-------------|
| Ingresos/gastos operativos                          | 1,96        | 1,59        | 2,09        |
| Indicadores de explotación                          | 0,51        | 0,63        | 0,48        |
| Indicadores operativos                              | 0,58        | 0,65        | 0,50        |
| Intereses/ingresos operativos                       | 2%          | 2%          | 1%          |
| Beneficio neto/ingresos operativos                  | 68%         | 56%         | 63%         |
| Pasivo/ingresos operativos                          | 0,73        | 0,70        | 0,51        |
| Deuda/capital                                       | 0,19        | 0,19        | 0,15        |
| Patrimonio neto/total de activos                    | 0,84        | 0,84        | 0,87        |
| Deuda a largo plazo/pasivo                          | 0,87        | 0,85        | 0,82        |
| Generación de ingresos propios/servicio de la deuda |             | 5,5         | 6,1         |

<sup>20</sup> Duff & Phelps de Colombia. Sociedad Calificadora de Valores. Análisis de Riesgo. Corporación Autónoma Regional.

| <b>DEUDA A LARGO PLAZO (en miles de US\$)</b> | <b>2007</b>   | <b>2008</b>   | <b>2009</b>   |
|-----------------------------------------------|---------------|---------------|---------------|
| PRÉSTAMO DEL BID 616                          | 16 773        | 15 734        | 13 340        |
| PRÉSTAMO DEL BID 852                          | 7665          | 7293          | 6457          |
| Banco Alemán de Desarrollo                    | 3287          | 3046          | 2584          |
| <b>TOTAL</b>                                  | <b>27 725</b> | <b>26 073</b> | <b>22 382</b> |

38. **Proyecciones financieras de la CAR.** Las proyecciones financieras se elaboraron para un período de 25 años. Los supuestos principales se basan en lo siguiente: i) indicadores macroeconómicos del Gobierno nacional; ii) funcionamiento actual de la CAR; iii) inversiones previstas y sus costos operativos asociados, y iv) los impuestos ambientales previstos por Bogotá Distrito Capital. El cuadro que se encuentra a continuación muestra los supuestos en detalle.

| Variable                                                                                                                                                                                                               | Proyección                                                                                                                                                                                                                                                                                                                                                                                                                                                                                                                                                                                                                                                                                                                                                                                                                                                                                                                                                                                          |
|------------------------------------------------------------------------------------------------------------------------------------------------------------------------------------------------------------------------|-----------------------------------------------------------------------------------------------------------------------------------------------------------------------------------------------------------------------------------------------------------------------------------------------------------------------------------------------------------------------------------------------------------------------------------------------------------------------------------------------------------------------------------------------------------------------------------------------------------------------------------------------------------------------------------------------------------------------------------------------------------------------------------------------------------------------------------------------------------------------------------------------------------------------------------------------------------------------------------------------------|
| Variables macroeconómicas:                                                                                                                                                                                             |                                                                                                                                                                                                                                                                                                                                                                                                                                                                                                                                                                                                                                                                                                                                                                                                                                                                                                                                                                                                     |
| <ul style="list-style-type: none"> <li>● Inflación</li> <li>● Tipo de cambio: CO\$:US\$</li> </ul>                                                                                                                     | <p>2009: 5%; 2010 en adelante: 3%. Fuente: DNP.</p> <p>2009: 2303; 2010: 2048; 2011: 1913; 2012: 1908; 2013: 1911; 2014: 1974. A partir de 2015, la variación en el tipo de cambio corresponde a la tasa de inflación nacional dividida por la tasa de inflación internacional. La inflación internacional se calcula en un 1,8% anual.</p>                                                                                                                                                                                                                                                                                                                                                                                                                                                                                                                                                                                                                                                         |
| Ingresos:                                                                                                                                                                                                              |                                                                                                                                                                                                                                                                                                                                                                                                                                                                                                                                                                                                                                                                                                                                                                                                                                                                                                                                                                                                     |
| <ul style="list-style-type: none"> <li>● Impuesto predial de Bogotá Distrito Capital</li> <li>● Tarifas ambientales de otros municipios</li> <li>● Cargos retributivos</li> <li>● Otros ingresos operativos</li> </ul> | <p>Según proyecciones de la Secretaría de Hacienda de Bogotá Distrito Capital. El Distrito eligió un escenario intermedio como el más realista.</p> <p>Proyecciones con la tasa de inflación</p> <p>De acuerdo con los resultados de un juicio iniciado por la CAR contra la EAAB por verter aguas residuales con contenidos de contaminación superiores a los límites legales permitidos, los cargos retributivos para la EAAB se aumentaron de la siguiente manera: en 2009, la EAAB tuvo que pagarle a la CAR CO\$28 000 por sanciones acumuladas. Desde 2010 en adelante, la EAAB tendrá que pagar CO\$10 000 millones anualmente por verter aguas residuales contaminadas. Estos cargos se distribuirán de manera igualitaria entre la CAR y Bogotá Distrito Capital. En 2015, cuando se implementen las mejoras en la PTAR Salitre, se reducirá la contaminación y también las sanciones por las descargas de aguas residuales contaminadas.</p> <p>Proyecciones con la tasa de inflación</p> |
| Gastos operativos:                                                                                                                                                                                                     | Proyecciones con la tasa de inflación                                                                                                                                                                                                                                                                                                                                                                                                                                                                                                                                                                                                                                                                                                                                                                                                                                                                                                                                                               |
| Monto del préstamo:                                                                                                                                                                                                    |                                                                                                                                                                                                                                                                                                                                                                                                                                                                                                                                                                                                                                                                                                                                                                                                                                                                                                                                                                                                     |
| <ul style="list-style-type: none"> <li>● BIRF</li> <li>● Otra entidad financiera internacional</li> </ul>                                                                                                              | <p>US\$250 millones</p> <p>US\$50 millones</p>                                                                                                                                                                                                                                                                                                                                                                                                                                                                                                                                                                                                                                                                                                                                                                                                                                                                                                                                                      |
| Condiciones de pago de préstamos:                                                                                                                                                                                      |                                                                                                                                                                                                                                                                                                                                                                                                                                                                                                                                                                                                                                                                                                                                                                                                                                                                                                                                                                                                     |
| <ul style="list-style-type: none"> <li>● Préstamos actuales</li> <li>● BIRF</li> </ul>                                                                                                                                 | <p>Según las condiciones suscriptas.</p> <p>i) Préstamo de US\$250 millones.</p> <p>ii) Tasa de interés basada en la tasa LIBOR de los últimos ocho años más 1,05 puntos básicos<sup>21</sup>. La tasa de interés resultante equivale al 4,7% anual.</p> <p>iii) Los pagos se calculan para dos escenarios: a) pagos uniformes durante el período de reembolso y b) pagos variables según el flujo de fondos.</p>                                                                                                                                                                                                                                                                                                                                                                                                                                                                                                                                                                                   |

<sup>21</sup> Esta tasa se usó en el análisis financiero y se supuso la tasa vigente en septiembre de 2009. La tasa vigente durante las negociaciones del préstamo era de 0,60 puntos básicos.

|                                                                                                                                                                                                                              |                                                                                                                                                                                        |
|------------------------------------------------------------------------------------------------------------------------------------------------------------------------------------------------------------------------------|----------------------------------------------------------------------------------------------------------------------------------------------------------------------------------------|
| <ul style="list-style-type: none"> <li>● Otra entidad financiera internacional</li> </ul>                                                                                                                                    | Condiciones financieras supuestas similares a las del BIRF: i) tasa de interés del 4,7%; ii) período de gracia de 5 años; iii) período de reembolso de 10 años, y iv) pagos uniformes. |
| Inversión: <ul style="list-style-type: none"> <li>● Proyecto del BIRF</li> <li>● Inversiones complementarias para el río Bogotá</li> <li>● Proyecto de la cuenca superior e inferior</li> <li>● Otras inversiones</li> </ul> | Costo del proyecto: US\$487 millones<br>Alrededor de US\$2 millones anuales<br><br>US\$50 millones<br>Variables según el flujo de fondos                                               |

39. En el cuadro siguiente, se presenta un resumen de los estados financieros previstos de la CAR. Los resultados muestran que la CAR puede pagar todas sus obligaciones financieras, no solo respecto del BIRF, sino también todas sus deudas actuales y probablemente un nuevo préstamo de alrededor de US\$50 millones para construir una PTAR pequeña, una red de alcantarillado y otras inversiones para el saneamiento de la cuenca inferior y superior. El escenario de referencia se basa en los términos del préstamo acordados en el momento de las negociaciones, con un vencimiento a 15 años, un período de gracia de 5 años y un plan de amortización adecuado a las necesidades. En este escenario, los indicadores muestran una situación financiera sólida. El coeficiente de explotación estaría por debajo de 0,6 durante todo el período, con un coeficiente operativo inferior a 0,65. Los indicadores de deuda muestran una buena relación entre pasivo, patrimonio neto y activo.

*Estados financieros previstos de la CAR*

| (millones de CO\$)                                | 2011           | 2012             | 2013             | 2014             | 2015             | 2016             | 2017             | 2018             | 2019             | 2020             | 2021             | 2022             | 2023             | 2024             | 2025             |
|---------------------------------------------------|----------------|------------------|------------------|------------------|------------------|------------------|------------------|------------------|------------------|------------------|------------------|------------------|------------------|------------------|------------------|
| <b>ESTADO DE RESULTADOS</b>                       |                |                  |                  |                  |                  |                  |                  |                  |                  |                  |                  |                  |                  |                  |                  |
| INGRESOS                                          |                |                  |                  |                  |                  |                  |                  |                  |                  |                  |                  |                  |                  |                  |                  |
| Impuesto catastral Bogotá (15%)                   | 150 320        | 168 070          | 178 076          | 185 440          | 193 086          | 194 831          | 196 597          | 204 640          | 212 989          | 221 654          | 230 648          | 239 982          | 242 054          | 244 153          | 253 964          |
| Tarifas ambientales                               | 50 041         | 51 542           | 53 088           | 54 681           | 50 525           | 52 041           | 53 602           | 55 210           | 56 867           | 58 573           | 60 330           | 62 140           | 64 004           | 65 924           | 67 902           |
| Otros ingresos                                    | 788            | 812              | 836              | 861              | 887              | 914              | 941              | 969              | 998              | 1028             | 1059             | 1091             | 1123             | 1157             | 1192             |
| <b>TOTAL INGRESOS</b>                             | <b>201 149</b> | <b>220 424</b>   | <b>232 000</b>   | <b>240 982</b>   | <b>244 498</b>   | <b>247 785</b>   | <b>251 140</b>   | <b>260 819</b>   | <b>270 853</b>   | <b>281 255</b>   | <b>292 037</b>   | <b>303 212</b>   | <b>307 182</b>   | <b>311 234</b>   | <b>323 058</b>   |
| COSTOS OPERATIVOS                                 | 103 140        | 106 234          | 113 088          | 116 500          | 120 016          | 123 639          | 127 921          | 131 217          | 135 179          | 139 262          | 143 468          | 148 528          | 152 269          | 156 872          | 161 614          |
| <b>EBITDA</b>                                     | <b>98 008</b>  | <b>114 190</b>   | <b>118 912</b>   | <b>124 482</b>   | <b>124 482</b>   | <b>124 147</b>   | <b>123 219</b>   | <b>129 603</b>   | <b>135 674</b>   | <b>141 993</b>   | <b>148 568</b>   | <b>154 684</b>   | <b>154 912</b>   | <b>154 362</b>   | <b>161 444</b>   |
| Depreciación y provisiones                        | 10 130         | 14 380           | 20 134           | 26 195           | 30 546           | 31 223           | 31 920           | 32 637           | 33 377           | 34 138           | 34 922           | 35 730           | 36 562           | 37 419           | 38 302           |
| Utilidades antes de intereses e impuestos (EBIT ) | 87 878         | 99 809           | 98 778           | 98 287           | 93 936           | 92 924           | 91 299           | 96 965           | 102 298          | 107 855          | 113 646          | 118 954          | 118 350          | 116 943          | 123 142          |
| Interés                                           | 3151           | 4473             | 16 176           | 24 260           | 29 197           | 29 538           | 27 576           | 25 187           | 22 516           | 19 476           | 16 015           | 12 298           | 8277             | 3936             | -                |
| Diferencias cambiarias                            | (1035)         | (128)            | 526              | 14 475           | 6490             | 6652             | 6257             | 5725             | 5129             | 4447             | 3686             | 2843             | 1915             | 914              | -                |
| Otros ingresos/gastos no operativos               | 4688           | 5384             | 1010             | 11 937           | 1415             | 707              | 603              | (490)            | (951)            | (1352)           | (1714)           | (1295)           | 831              | 4000             | 7469             |
| <b>UTILIDAD NETA</b>                              | <b>90 450</b>  | <b>100 848</b>   | <b>83 087</b>    | <b>71 488</b>    | <b>59 664</b>    | <b>57 440</b>    | <b>58 069</b>    | <b>65 563</b>    | <b>73 702</b>    | <b>82 580</b>    | <b>92 230</b>    | <b>102 518</b>   | <b>108 989</b>   | <b>116 092</b>   | <b>130 611</b>   |
| <b>BALANCE</b>                                    |                |                  |                  |                  |                  |                  |                  |                  |                  |                  |                  |                  |                  |                  |                  |
| ACTIVOS                                           |                |                  |                  |                  |                  |                  |                  |                  |                  |                  |                  |                  |                  |                  |                  |
| Activo corriente                                  | 405 736        | 529 860          | 481 494          | 364 541          | 233 638          | 248 190          | 256 676          | 266 784          | 277 403          | 290 547          | 306 524          | 325 257          | 343 791          | 376 428          | 500 712          |
| Activos a largo plazo                             | 566 002        | 776 130          | 1 059 913        | 1 353 893        | 1 553 182        | 1 557 695        | 1 562 584        | 1 567 859        | 1 573 533        | 1 579 616        | 1 586 121        | 1 593 062        | 1 600 451        | 1 608 302        | 1 616 628        |
| <b>TOTAL ACTIVOS</b>                              | <b>971 737</b> | <b>1 305 990</b> | <b>1 541 407</b> | <b>1 718 433</b> | <b>1 786 820</b> | <b>1 805 886</b> | <b>1 819 260</b> | <b>1 834 643</b> | <b>1 850 935</b> | <b>1 870 163</b> | <b>1 892 645</b> | <b>1 918 319</b> | <b>1 944 242</b> | <b>1 984 729</b> | <b>2 117 339</b> |
| PASIVOS                                           |                |                  |                  |                  |                  |                  |                  |                  |                  |                  |                  |                  |                  |                  |                  |
| Pasivos corrientes                                | 18 040         | 18 385           | 26 867           | 45 766           | 59 493           | 65 851           | 71 252           | 78 346           | 84 081           | 90 204           | 96 961           | 102 772          | 94 844           | 16 876           | 17 382           |
| Pasivos a largo plazo                             | 109 535        | 342 596          | 486 444          | 573 082          | 568 078          | 523 345          | 473 249          | 415 976          | 352 831          | 283 356          | 206 851          | 124 195          | 49 058           | 51 421           | 52 914           |
| <b>TOTAL PASIVOS</b>                              | <b>127 575</b> | <b>360 980</b>   | <b>513 311</b>   | <b>618 848</b>   | <b>627 571</b>   | <b>589 196</b>   | <b>544 501</b>   | <b>494 322</b>   | <b>436 912</b>   | <b>373 560</b>   | <b>303 812</b>   | <b>226 967</b>   | <b>143 902</b>   | <b>68 297</b>    | <b>70 296</b>    |
| <b>PATRIMONIO</b>                                 | <b>844 162</b> | <b>945 009</b>   | <b>1 028 096</b> | <b>1 099 584</b> | <b>1 159 249</b> | <b>1 216 689</b> | <b>1 274 758</b> | <b>1 340 321</b> | <b>1 414 022</b> | <b>1 496 603</b> | <b>1 588 833</b> | <b>1 691 351</b> | <b>1 800 339</b> | <b>1 916 432</b> | <b>2 047 043</b> |
| <b>TOTAL PASIVOS Y PATRIMONIO</b>                 | <b>971 737</b> | <b>1 305 990</b> | <b>1 541 407</b> | <b>1 718 433</b> | <b>1 786 820</b> | <b>1 805 885</b> | <b>1 819 259</b> | <b>1 834 642</b> | <b>1 850 935</b> | <b>1 870 162</b> | <b>1 892 645</b> | <b>1 918 318</b> | <b>1 944 242</b> | <b>1 984 729</b> | <b>2 117 339</b> |
| <b>FLUJO DE CAJA</b>                              | <b>2011</b>    | <b>2012</b>      | <b>2013</b>      | <b>2014</b>      | <b>2015</b>      | <b>2016</b>      | <b>2017</b>      | <b>2018</b>      | <b>2019</b>      | <b>2020</b>      | <b>2021</b>      | <b>2022</b>      | <b>2023</b>      | <b>2024</b>      | <b>2025</b>      |
| Flujo de caja proveniente de                      | 154 067        | 155 385          | 168 180          | 152 997          | 131 159          | 133 610          | 130 849          | 134 403          | 138 445          | 142 868          | 147 545          | 56 718           | 52 302           | 43 987           | 47 456           |

|                                                                          |          |          |           |           |           |        |        |         |         |         |         |          |          |          |          |
|--------------------------------------------------------------------------|----------|----------|-----------|-----------|-----------|--------|--------|---------|---------|---------|---------|----------|----------|----------|----------|
| operaciones                                                              |          |          |           |           |           |        |        |         |         |         |         |          |          |          |          |
| Servicio de la deuda                                                     | -        | -        |           |           |           |        |        |         |         |         |         |          |          |          |          |
| Interés                                                                  | 3151     | 4473     | 16 176    | 24 260    | 29 197    | 29 538 | 27 576 | 25 187  | 22 516  | 19 476  | 16 015  | 12 298   | 8277     | 3936     | -        |
| Diferencias cambiarias                                                   | (1035)   | (128)    | 526       | 14 475    | 6490      | 6652   | 6257   | 5725    | 5129    | 4447    | 3686    | 2843     | 1915     | 914      | -        |
| Amortización                                                             | 6548     | 6548     | 6548      | 14 675    | 33 209    | 46 559 | 52 529 | 57 531  | 64 212  | 69 524  | 75 210  | 81 517   | 86 865   | 78 460   | -        |
| Total del servicio de la deuda                                           | 10 735   | 11 150   | 22 199    | 24 460    | 55 916    | 69 445 | 73 849 | 76 992  | 81 600  | 84 553  | 87 539  | 90 972   | 93 226   | 81 482   | -        |
| Flujo de caja después del servicio de la deuda, antes del financiamiento | 143 333  | 144 235  | 145 981   | 128 538   | 75 242    | 64 165 | 57 000 | 57 411  | 56 845  | 58 315  | 60 006  | (34 254) | (40 924) | (37 495) | 47 456   |
| Inversión                                                                | 195 026  | 224 508  | 303 918   | 320 174   | 229 836   | 35 736 | 36 808 | 37 913  | 39 050  | 40 221  | 41 428  | 42 671   | 43 951   | 45 270   | 46 628   |
| Flujo de caja después de la inversión                                    | (51 693) | (80 274) | (157 936) | (191 637) | (154 593) | 28 429 | 20 192 | 19 498  | 17 795  | 18 094  | 18 578  | (76 925) | (84 875) | (82 765) | 828      |
| Aportes de capital                                                       | -        | -        | -         | -         | -         | -      | -      | -       | -       | -       | -       | -        | -        | -        | -        |
| Préstamos                                                                | 29 171   | 238 720  | 156 951   | 104 294   | 33 955    | -      | -      | -       | -       | -       | -       | -        | -        | -        | -        |
| Flujo de caja después del financiamiento                                 | (22 522) | 158 447  | (986)     | (87 343)  | (120 638) | 28 429 | 20 192 | 19 498  | 17 795  | 18 094  | 18 578  | (76 925) | (84 875) | (82 765) | 828      |
| Aumento (disminución) neto del efectivo                                  | (22 522) | 158 447  | (986)     | (87 343)  | (120 638) | 28 429 | 20 192 | 19 498  | 17 795  | 18 094  | 18 578  | (76 925) | (84 875) | (82 765) | 828      |
| Aumento (disminucion) acumulado del efectivo                             | 100 524  | 258 971  | 257 985   | 170 642   | 50 004    | 78 432 | 98 624 | 118 122 | 135 917 | 154 011 | 172 589 | 95 664   | 10 789   | (71 976) | (71 148) |
| <b>Indicadores financieros</b>                                           | 2011     | 2012     | 2013      | 2014      | 2015      | 2016   | 2017   | 2018    | 2019    | 2020    | 2021    | 2022     | 2023     | 2024     | 2025     |
| Ingresos/gastos operativos                                               | 1,95     | 2,07     | 2,05      | 2,07      | 2,04      | 2,00   | 1,96   | 1,99    | 2,00    | 2,02    | 2,04    | 2,04     | 2,02     | 1,98     | 2,00     |
| Indicador de trabajo                                                     | 0,51     | 0,48     | 0,49      | 0,48      | 0,49      | 0,50   | 0,51   | 0,50    | 0,50    | 0,50    | 0,49    | 0,49     | 0,50     | 0,50     | 0,50     |
| Índice de operación                                                      | 0,56     | 0,55     | 0,57      | 0,59      | 0,62      | 0,62   | 0,64   | 0,63    | 0,62    | 0,62    | 0,61    | 0,61     | 0,61     | 0,62     | 0,62     |
| Interés/ingresos operativos                                              | 2%       | 2%       | 7%        | 10%       | 12%       | 12%    | 11%    | 10%     | 8%      | 7%      | 5%      | 4%       | 3%       | 1%       | 0%       |
| Ganancias/ingresos netos                                                 | 45%      | 46%      | 36%       | 30%       | 24%       | 23%    | 23%    | 25%     | 27%     | 29%     | 32%     | 34%      | 35%      | 37%      | 40%      |
| Pasivo/ingresos operativos                                               | 0,63     | 1,64     | 2,21      | 2,57      | 2,57      | 2,38   | 2,17   | 1,90    | 1,61    | 1,33    | 1,04    | 0,75     | 0,47     | 0,22     | 0,22     |
| Pasivo/patrimonio                                                        | 0,15     | 0,38     | 0,50      | 0,56      | 0,54      | 0,48   | 0,43   | 0,37    | 0,31    | 0,25    | 0,19    | 0,13     | 0,08     | 0,04     | 0,03     |
| Patrimonio/activos totales                                               | 0,87     | 0,72     | 0,67      | 0,64      | 0,65      | 0,67   | 0,70   | 0,73    | 0,76    | 0,80    | 0,84    | 0,88     | 0,93     | 0,97     | 0,97     |
| Deuda a largo plazo/pasivo                                               | 0,86     | 0,95     | 0,95      | 0,93      | 0,91      | 0,89   | 0,87   | 0,84    | 0,81    | 0,76    | 0,68    | 0,55     | 0,34     | 0,75     | 0,75     |
| Generación interna de caja/servicio de la deuda (veces)                  | 14,4     | 13,9     | 7,6       | 6,3       | 2,3       | 1,9    | 1,8    | 1,7     | 1,7     | 1,7     | 1,7     | 0,6      | 0,6      | 0,5      |          |

|                                          |   |    |   |   |      |      |      |      |      |      |      |   |   |   |  |
|------------------------------------------|---|----|---|---|------|------|------|------|------|------|------|---|---|---|--|
| Ingresos operativos/servicio de la deuda | 9 | 10 | 5 | 5 | 2,23 | 1,79 | 1,67 | 1,68 | 1,66 | 1,68 | 1,70 | 2 | 2 | 2 |  |
|------------------------------------------|---|----|---|---|------|------|------|------|------|------|------|---|---|---|--|

## **B.2. Evaluación financiera de los fondos del FIAB para el proyecto**

40. Según el Convenio 171, los recursos para el FIAB son los siguientes: i) 7,5% del impuesto predial de Bogotá Distrito Capital y ii) los cargos retributivos por la contaminación de las descargas de aguas residuales a lo largo de la zona urbana del río Bogotá. La CAR está a cargo de la gestión del fondo y del pago de lo siguiente: i) costos de inversión del proyecto; ii) inversiones adicionales a lo largo de los afluentes del río Bogotá, y iii) mantenimiento y operación de todas las obras del río. Para ejecutar la inversión del proyecto, la CAR solicitó un préstamo al BIRF por un monto de US\$250 millones.

41. **Situación actual.** La CAR no ha comenzado con las obras del proyecto y el monto acumulado en el FIAB en diciembre de 2009 ronda los 303 000 millones (alrededor de US\$150 millones), que están disponibles para la inversión como aporte local.

42. **Situación prevista.** La proyección se realizó con los mismos supuestos que para la CAR como entidad. En el cuadro que se encuentra a continuación, se muestran más detalles sobre los costos programados del proyecto, además de los costos de operación y mantenimiento.

| <b>Inversión del proyecto<br/>(en millones de US\$)</b> | <b>2011</b> | <b>2012</b> | <b>2013</b> | <b>2014</b> | <b>2015</b> | <b>Total</b> |
|---------------------------------------------------------|-------------|-------------|-------------|-------------|-------------|--------------|
| Costo total                                             | 64,1        | 82,6        | 121,9       | 127,6       | 90,7        | 487,0        |
| Préstamo del Banco                                      | -           | 116,0       | 73,0        | 44,0        | 17,0        | 250,0        |

43. Las proyecciones financieras se elaboraron con el plan de amortización que se acordó con la CAR durante las negociaciones del préstamo. En la próxima página, se muestra el plan de amortización y los indicadores de flujo de fondos y deuda del FIAB.

*Plan de amortización de la deuda*

|                                    | 2015  | 2016  | 2017  | 2018  | 2019   | 2020   | 2021   | 2022   | 2023   | 2024   | Total  |
|------------------------------------|-------|-------|-------|-------|--------|--------|--------|--------|--------|--------|--------|
| Amortización<br>(millones de US\$) | 8,3   | 14,8  | 20,0  | 22,1  | 25,0   | 27,5   | 30,0   | 32,5   | 34,5   | 35,4   | 250    |
| Porcentaje                         | 3,30% | 5,92% | 8,00% | 8,85% | 10,00% | 10,99% | 12,00% | 13,00% | 13,80% | 14,14% | 100,0% |

*Proyecciones del flujo de fondos*

| Millones de CO\$                                      | 2011     | 2012      | 2013      | 2014      | 2015      | 2016    | 2017    | 2018    | 2019    | 2020    | 2021    | 2022    | 2023    | 2024    | 2025    |
|-------------------------------------------------------|----------|-----------|-----------|-----------|-----------|---------|---------|---------|---------|---------|---------|---------|---------|---------|---------|
| INGRESOS                                              |          |           |           |           |           |         |         |         |         |         |         |         |         |         |         |
| 7,5% Impuesto catastral<br>de Bogotá Distrito Capital | 75 160   | 84 035    | 89 038    | 92 720    | 96 543    | 97 415  | 98 298  | 102 320 | 106 494 | 110 827 | 115 324 | 119 991 | 121 027 | 122 076 | 126 982 |
| COSTOS DE OPERACIÓN<br>Y MANTENIMIENTO                | -        | -         | 3667      | 3796      | 3931      | 4071    | 4766    | 4367    | 4524    | 4687    | 4857    | 5758    | 5216    | 5407    | 5605    |
| Ingresos menos costos<br>operativos                   | 75 160   | 84 035    | 85 371    | 88 924    | 92 612    | 93 345  | 93 532  | 97 953  | 101 970 | 106 140 | 110 467 | 114 233 | 115 811 | 116 669 | 121 377 |
| Gastos financieros                                    | -        | 62        | 11 194    | 18 760    | 23 417    | 24 582  | 23 354  | 21 555  | 19 487  | 17 061  | 14 229  | 11 133  | 7688    | 3936    | -       |
| FLUJO DE CAJA ANTES<br>DE LA INVERSIÓN                | 75 160   | 83 973    | 74 177    | 70 163    | 69 195    | 68 763  | 70 178  | 76 398  | 82 483  | 89 078  | 96 238  | 103 100 | 108 123 | 112 733 | 121 377 |
| Costos proyecto                                       | 135 029  | 175 323   | 253 780   | 269 055   | 195 141   | -       | -       | -       | -       | -       | -       | -       | -       | -       | -       |
| Otras inversiones<br>asociadas con el proyecto        | 10 000   | 10 000    | 10 000    | 10 000    | 10 000    |         |         |         |         |         |         |         |         |         |         |
| FLUJO DE CAJA ANTES<br>DEL FINANCIAMIENTO             | (69 869) | (101 350) | (189 603) | (208 892) | (135 946) | 68 763  | 70 178  | 76 398  | 82 483  | 89 078  | 96 238  | 103 100 | 108 123 | 112 733 | 121 377 |
| Desembolsos del BIRF                                  | -        | 221 286   | 139 517   | 86 860    | 33 955    | -       | -       | -       | -       | -       | -       | -       | -       | -       | -       |
| Amortización                                          | -        | -         | -         | -         | 16 478    | 29 909  | 40 894  | 45 773  | 52 330  | 58 189  | 64 285  | 70 463  | 75 681  | 78 460  | -       |
| FLUJO DE CAJA DESPUÉS<br>DEL FINANCIAMIENTO           | (69 869) | 119 936   | (50 086)  | (122 032) | (118 469) | 38 854  | 29 283  | 30 625  | 30 153  | 30 890  | 31 953  | 32 636  | 32 442  | 34 273  | 121 377 |
| FLUJO DE CAJA<br>ACUMULADO                            | 281 749  | 401 685   | 351 599   | 229 566   | 111 097   | 149 951 | 179 234 | 209 859 | 240 013 | 270 902 | 302 855 | 335 491 | 367 933 | 402 206 | 523 583 |

*Indicadores de deuda del FIAB del Proyecto*

|                                                     | 2013 | 2014 | 2015 | 2016 | 2017 | 2018 | 2019 | 2020 | 2021 | 2022 | 2023 | 2024 | 2025 |
|-----------------------------------------------------|------|------|------|------|------|------|------|------|------|------|------|------|------|
| Gastos operativos/ingresos                          | 0,04 | 0,04 | 0,04 | 0,04 | 0,05 | 0,04 | 0,04 | 0,04 | 0,04 | 0,05 | 0,04 | 0,04 | 0,04 |
| Gastos operativos más intereses/ingresos            | 0,17 | 0,24 | 0,28 | 0,29 | 0,29 | 0,25 | 0,23 | 0,20 | 0,17 | 0,14 | 0,11 | 0,08 | 0,04 |
| Gastos operativos más servicio de la deuda/ingresos | 0,17 | 0,24 | 0,45 | 0,60 | 0,70 | 0,70 | 0,72 | 0,72 | 0,72 | 0,73 | 0,73 | 0,72 | 0,04 |

44. **Análisis de sensibilidad y riesgo.** Los resultados obtenidos hasta el momento suponen que los supuestos definidos para cada variable son correctos. El análisis de sensibilidad y riesgo mide el impacto que se produce sobre los resultados cuando cambian algunos de los valores supuestos para las variables críticas. El análisis de sensibilidad mide el resultado si una de las variables cambia y el resto permanece igual. El análisis de riesgo mide el resultado si todas las variables seleccionados cambian al mismo tiempo, cada una basada en la distribución de probabilidades. El análisis se realizó teniendo en cuenta supuestos críticos, algunos de los cuales están fuera del control de gestión de la CAR, mientras que otros están bajo algún tipo de control de gestión.

45. En el cuadro siguiente se resumen las principales variables. Algunas de las variables elegidas están vinculadas. Por ejemplo, la variación en el tipo de cambio de 2015 se relaciona directamente con la tasa de inflación nacional, ya que se calcula como la relación entre el índice de inflación nacional y el índice de inflación de los Estados Unidos. Los ingresos resultantes del impuesto predial también cambian con la tasa de inflación, debido a que es una de las variables que determinan la tasa impositiva. Para el análisis de sensibilidad, se analizaron todas las variables elegidas suponiendo que se producen cambios en una variable mientras que las otras permanecen constantes.

| <b>Variables fuera del control de gestión de la CAR</b>                                                                                                                                                        | <b>Variables con más de un control de gestión</b>                                                    |
|----------------------------------------------------------------------------------------------------------------------------------------------------------------------------------------------------------------|------------------------------------------------------------------------------------------------------|
| <ul style="list-style-type: none"> <li>• Tasa de inflación</li> <li>• Tipo de cambio</li> <li>• Transferencia de los ingresos del impuesto predial de Bogotá Distrito Capital</li> <li>• Tasa Libor</li> </ul> | <ul style="list-style-type: none"> <li>• Costos operativos</li> <li>• Costos de inversión</li> </ul> |

46. **Análisis del riesgo.** para mejorar la exactitud del análisis financiero, es posible calcular las incertidumbres del mundo real con la simulación de Monte Carlo y el software Crystal Ball. Este software mide el alcance de diversos riesgos y su impacto en los resultados del proyecto mediante la creación de un modelo de distribución de probabilidades que describe mejor el comportamiento de cada una de las variables elegidas. Sobre la base de una simulación de 1000 pruebas, el modelo recalcula los resultados de los análisis financieros cambiando simultáneamente cada una de las variables de riesgo seleccionadas de acuerdo con las distribuciones de probabilidades. En el cuadro que se encuentra a continuación, se muestran las distribuciones de probabilidades supuestas para cada variable y sus respectivos parámetros. La distribución elegida para variables macroeconómicas se basó en pautas históricas. Para los costos de inversión, se tuvo en cuenta los criterios de ingenieros locales con conocimientos sobre el proyecto y las posibles variaciones en los costos.



## Distribución de las probabilidades de los supuestos

| Variable                                                 |                                                                                     | Distribución de la probabilidad                                                                       |
|----------------------------------------------------------|-------------------------------------------------------------------------------------|-------------------------------------------------------------------------------------------------------|
| Costos de inversión superiores a los previstos           | 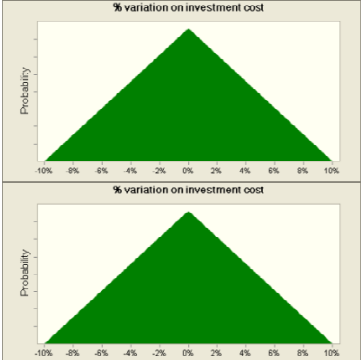   | Distribución triangular con parámetros:<br>Mínimo -10%<br>Más probable 0%<br>Máximo 10%               |
| Gastos operativos superiores a los previstos             | 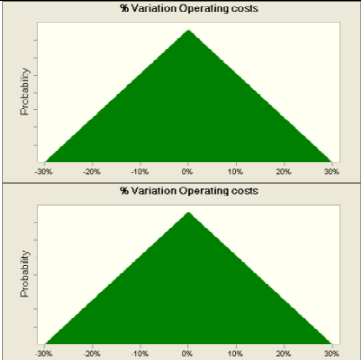  | Distribución triangular con parámetros:<br>Mínimo -30%<br>Más probable 0%<br>Máximo 30%               |
| Variación en los ingresos del impuesto predial de Bogotá | 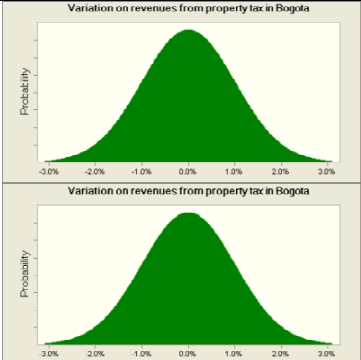 | Distribución normal con parámetros:<br>Media 0%<br>Desviación estándar 1%                             |
| Variación adicional de la tasa de inflación por año (%)  | 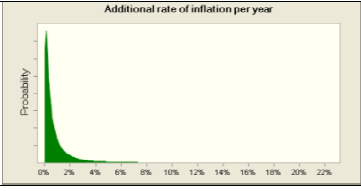 | Distribución logarítmica normal con parámetros:<br>Ubicación 0%<br>Media 1%<br>Desviación estándar 2% |

|                                               |                                                                                   |                                                                                                             |
|-----------------------------------------------|-----------------------------------------------------------------------------------|-------------------------------------------------------------------------------------------------------------|
| <p>Variación adicional del tipo de cambio</p> | 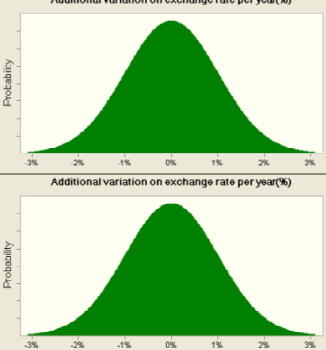 | <p>Distribución normal con parámetros:<br/> Media 0%<br/> Desviación estándar 1%</p>                        |
| <p>Tasa Libor</p>                             | 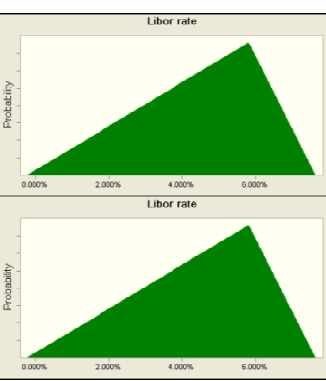 | <p>Distribución triangular con parámetros:<br/> Mínimo 1,23%<br/> Más probable 4,70%<br/> Máximo 7,621%</p> |

47. El análisis del riesgo muestra una situación sólida, con una certeza cercana al 100% de que el proyecto se puede pagar según los supuestos acordados con la CAR y con la distribución de probabilidades elegida. Sin embargo, de haber cambios importantes en la estabilidad macroeconómica de Colombia, los resultados cambiarían. Por ejemplo, si hubiera una devaluación del 9% anual y una inflación del 8%, el flujo de fondos sería negativo y se necesitarían los recursos de la CAR.

### B.3. Evaluación financiera de la EAAB

48. La EAAB operará la planta Salitre y la CAR será responsable de financiar la ampliación y el mejoramiento de dicha planta. Por lo tanto, se realizó un análisis financiero de la EAAB para determinar la sostenibilidad de las operaciones de la planta. Este análisis se basó en los estados financieros auditados correspondientes a los últimos tres ejercicios (2006 a 2008) y una proyección financiera a 15 años.

49. Como se puede observar en los cuadros a continuación, la EAAB mantuvo una situación financiera sólida durante los últimos tres años. La liquidez, la rentabilidad y los indicadores de deuda muestran niveles razonables, que se pueden comparar con otras empresas de abastecimiento de agua eficientes de tamaño similar. Los ingresos corresponden a casi tres veces los costos operativos (sin depreciación ni reservas). Cuando se incluyeron la depreciación y las reservas para contingencias y fondos de pensión como costos operativos, los ingresos fueron un 20% mayor. El total de la deuda fue del 65% del capital en 2008, con indicadores de liquidez superiores a 5. La rotación de las cuentas por cobrar aumentó de 5,2 en 2006 a 8 en 2008, lo que significa que las cuentas por cobrar representaban 1,5 meses de los ingresos de facturación, lo que indica un desempeño excelente.

# ESTADOS FINANCIEROS DE LA EAAB

| (en millones de CO\$)                                              | 2006      | 2007      | 2008      |
|--------------------------------------------------------------------|-----------|-----------|-----------|
| <b>ESTADO DE RESULTADOS</b>                                        |           |           |           |
| Ingresos                                                           | 987 159   | 1 103 731 | 1 170 553 |
| Gastos operativos                                                  | 413 861   | 447 839   | 465 301   |
| Utilidades antes de impuestos, depreciación y amortización (EBTDA) | 573 298   | 655 892   | 705 252   |
| Depreciación                                                       | 125 530   | 131 467   | 144 018   |
| Reservas (fondo de pensión)                                        | 281 893   | 286 678   | 357 127   |
| Otros ingresos/gastos                                              | 184 208   | 24 927    | 168 184   |
| EBIT                                                               | 350 083   | 262 675   | 372 291   |
| Gastos financieros                                                 | 165 495   | 107 606   | 137 618   |
| Beneficio neto                                                     | 184 588   | 155 068   | 234 673   |
| <b>BALANCE GENERAL</b>                                             |           |           |           |
| 2006                                                               | 2007      | 2008      |           |
| <b>Activo</b>                                                      |           |           |           |
| Activo corriente                                                   | 1 585 583 | 1 643 796 | 1 697 216 |
| Activos a largo plazo                                              | 5 163 805 | 5 670 751 | 6 272 543 |
| Total del activo                                                   | 6 749 387 | 7 314 547 | 7 969 759 |
| <b>Pasivo</b>                                                      |           |           |           |
| Pasivo corriente                                                   | 232 377   | 262 884   | 242 216   |
| Pasivos a largo plazo                                              |           |           |           |
| Deudas (bonos y préstamos)                                         | 478 974   | 554 207   | 566 510   |
| Pasivos del fondo de pensión                                       | 1 548 860 | 1 629 184 | 1 791 647 |
| Otros pasivos a largo plazo                                        | 480 268   | 504 874   | 547 583   |
| Total del pasivo                                                   | 2 740 479 | 2 951 150 | 3 147 957 |
| Patrimonio neto                                                    | 4 008 909 | 4 363 397 | 4 821 803 |
| Total de pasivo y patrimonio neto                                  | 6 749 387 | 7 314 547 | 7 969 759 |

## INDICADORES FINANCIEROS DE LA EAAB (2006-08)

|                                                                      | 2006 | 2007 | 2008 |
|----------------------------------------------------------------------|------|------|------|
| <b>Indicadores de liquidez</b>                                       |      |      |      |
| Coefficiente de liquidez                                             | 6,8  | 6,3  | 7,0  |
| Razón de activo disponible a pasivo corriente (prueba ácida)         | 5,3  | 5,0  | 5,7  |
| <b>Indicadores de eficiencia</b>                                     |      |      |      |
| Rotación de cuentas por cobrar                                       | 5,18 | 6,46 | 8,22 |
| Productividad laboral (empleados cada 1000 conexiones de agua)       | 1,1  | 1,1  | 1,1  |
| Agua no contabilizada                                                | 37%  | 32%  | 35%  |
| <b>Indicadores de rentabilidad</b>                                   |      |      |      |
| Coefficiente de operación                                            | 0,83 | 0,78 | 0,83 |
| Coefficiente de explotación                                          | 0,42 | 0,41 | 0,40 |
| Margen de ganancia (beneficio neto/ingresos)                         | 19%  | 14%  | 20%  |
| Rendimiento del activo (beneficio neto/total del activo promedio)    | 3%   | 2%   | 3%   |
| Rendimiento del patrimonio (beneficio neto/patrimonio neto promedio) | 5%   | 4%   | 5%   |
| (EBTDA) Margen operativo (utilidad operativa/ingresos)               | 58%  | 59%  | 60%  |
| (EBIT) Margen operativo (utilidad operativa/ingresos)                | 17%  | 22%  | 17%  |
| <b>Apalancamiento/coertura</b>                                       |      |      |      |
| Deuda total (incluye el pasivo del fondo de pensión)/capital         | 0,68 | 0,68 | 0,65 |
| Deuda total (sin incluir el pasivo del fondo de pensión)/capital     | 0,06 | 0,10 | 0,10 |
| EBIT/gastos en concepto de intereses                                 | 1,72 | 2,94 | 2,20 |

|                                        |      |      |      |
|----------------------------------------|------|------|------|
| EBITDA/gastos en concepto de intereses | 5,93 | 8,12 | 7,61 |
|----------------------------------------|------|------|------|

50. Los indicadores de deuda muestran resultados razonables, a pesar de que en 2008 se debía el 57% de la deuda al fondo de pensión (US\$900 millones, 37% del capital). En los últimos años, la EAAB inició una reserva anual del 10% del pasivo del fondo de pensión. En 2008, el 18% del pasivo de pensión estaba financiado<sup>22</sup>. Otros pasivos a largo plazo incluían: bonos emitidos (7%), préstamos de entidades financieras (10%) y pasivos de contingencia, fiscales y otros (el 24% restante). Duff & Phelps también observó el buen desempeño financiero de la EAAB y le otorgó las siguientes calificaciones como resultado de las evaluaciones de riesgos realizadas en los últimos tres años: AA<sup>+</sup> en 2006 y 2007, y AAA en 2008.

51. **Proyecciones financieras.** En el cuadro que se halla a continuación, se resumen los supuestos de las proyecciones:

| Variable                    | Proyección                                                                                                                                                                                                                                         |
|-----------------------------|----------------------------------------------------------------------------------------------------------------------------------------------------------------------------------------------------------------------------------------------------|
| Variables macroeconómicas   | Las mismas utilizadas para proyectar la situación financiera de la CAR y que el DNP proporcionó.                                                                                                                                                   |
| Población                   | Tasa de crecimiento del 1,48% anual hasta 2010; 1,36% hasta 2015; 1,24% en adelante (según proyecciones del Departamento Administrativo Nacional de Estadística [DANE]).                                                                           |
| Cobertura                   | Permanece a niveles constantes (99%). Los usuarios aumentan al mismo ritmo que la población (crecimiento vegetativo).                                                                                                                              |
| Ingresos                    | Los ingresos provenientes del agua y del alcantarillado se proyectaron según el consumo actual de agua por conexión y la tarifa actual ajustada anualmente con la inflación.                                                                       |
| Gastos operativos           | Todos los gastos operativos, con excepción del tratamiento de aguas servidas, se proyectaron según los costos unitarios actuales. El costo del tratamiento de aguas servidas se proyectó según el tipo de tratamiento y el volumen que se tratará. |
| Inversión                   | Según lo previsto en el plan de financiamiento de la EAAB.                                                                                                                                                                                         |
| Pasivo del fondo de pensión | Según lo previsto para la EAAB.                                                                                                                                                                                                                    |

52. **Costo del tratamiento de aguas residuales.** En la actualidad, Salitre brinda tratamiento primario con un flujo promedio de 4 metros cúbicos/segundo. Históricamente, Bogotá Distrito Capital ha financiado el costo del tratamiento, pero en 2010 la EAAB se hará cargo de todos los costos del tratamiento. A partir de 2015, Salitre tendrá el doble de capacidad (8 metros cúbicos/segundo) y mejorará el tratamiento a un nivel secundario. En 2016, se anticipa que la planta Canoas empezará a funcionar con un caudal de 14 metros cúbicos/segundo con tratamiento primario. En 2023, se prevé que se mejorará para convertirla en una planta de tratamiento secundario. En el cuadro que se halla continuación, se resumen los costos operativos tanto para Salitre como para Canoas, mientras que en el cuadro siguiente se muestran los posibles impactos de las tarifas.

|                                         | US\$/m <sup>3</sup> | CO\$/m <sup>3</sup> | Año de operación |
|-----------------------------------------|---------------------|---------------------|------------------|
| PTAR Salitre con tratamiento primario   | 0,030               | 158                 | 2010             |
| PTAR Salitre con tratamiento secundario | 0,087               | 198                 | 2015             |
| PTAR Canoas con tratamiento primario    | 0,059               | 133                 | 2016             |
| PTAR Canoas con tratamiento secundario  | 0,153               | 347                 | 2023             |

<sup>22</sup> DCR Duff & Phelps de Colombia. Sociedad Calificadora de Valores. Empresa de Acueducto y Alcantarillado de Bogotá- (EAAB-ESP). Bogotá, Abril 2009.

|                                    | Costo de tratamiento por metro cúbico tratado |                             | Costo equivalente por metro cúbico recolectado en alcantarillado | Aumento requerido en tarifas de alcantarillado | Aumento equivalente aplicado a las tarifas de agua y alcantarillado actuales |      |
|------------------------------------|-----------------------------------------------|-----------------------------|------------------------------------------------------------------|------------------------------------------------|------------------------------------------------------------------------------|------|
|                                    | US\$/m <sup>3</sup> tratado                   | CO\$/m <sup>3</sup> tratado | CO\$/m <sup>3</sup> recolectado en alcantarillado                | %                                              | Acumulados                                                                   | Año  |
| Salitre con tratamiento primario   | 0,03                                          | 64                          | 30                                                               | 1,9%                                           | 0,7%                                                                         | 2010 |
| Salitre con tratamiento secundario | 0,09                                          | 200                         | 201                                                              | 13,0%                                          | 4,8%                                                                         | 2015 |
| Canoas con tratamiento primario    | 0,06                                          | 136                         | 375                                                              | 24,3%                                          | 9,0%                                                                         | 2016 |
| Canoas con tratamiento secundario  | 0,15                                          | 352                         | 828                                                              | 41,0%                                          | 20,0%                                                                        | 2023 |

53. *Proyecciones financieras de la EAAB.* Los cuadros siguientes muestran el impacto en las finanzas de la EAAB bajo la suposición de que el aumento de tarifas será el indicado en el cuadro previo.

| <i>Table 21. FINANCIAL STATEMENTS EAAB (million Col \$)</i> | 2010      | 2011      | 2012      | 2013       | 2014       | 2015       | 2016       | 2017       |
|-------------------------------------------------------------|-----------|-----------|-----------|------------|------------|------------|------------|------------|
| <b>INCOME STATEMENT</b>                                     |           |           |           |            |            |            |            |            |
| Revenues                                                    | 1,204,640 | 1,263,500 | 1,318,837 | 1,376,602  | 1,436,902  | 1,558,871  | 1,689,153  | 1,761,156  |
| Operating expenses                                          | 532,527   | 558,590   | 583,098   | 608,637    | 635,295    | 725,771    | 822,984    | 854,192    |
| EBTDA                                                       | 672,112   | 704,910   | 735,739   | 767,966    | 801,607    | 833,100    | 866,169    | 906,964    |
| Depreciation                                                | 238,924   | 240,049   | 261,614   | 281,416    | 302,787    | 328,112    | 357,436    | 388,984    |
| Provision (pension fund)                                    | 272,358   | 287,432   | 300,639   | 313,958    | 327,537    | 341,385    | 355,356    | 369,274    |
| Other Revenue/expenses                                      | 134,325   | 107,238   | 85,568    | 68,232     | 54,364     | 43,268     | 34,393     | 34,393     |
| EBIT                                                        | 295,155   | 284,666   | 259,054   | 240,824    | 225,646    | 206,871    | 187,769    | 183,099    |
| Financial expenses                                          | 112,657   | 101,838   | 96,818    | 74,805     | 58,348     | 52,193     | 41,302     | 27,893     |
| Net Income                                                  | 182,498   | 182,828   | 160,236   | 166,019    | 167,298    | 154,677    | 146,468    | 155,206    |
| <b>BALANCE SHEET</b>                                        | 2,010     | 2,011     | 2,012     | 2,013      | 2,014      | 2,015      | 2,016      | 2,017      |
| <b>Assets</b>                                               |           |           |           |            |            |            |            |            |
| Current assets                                              | 1,779,406 | 1,918,247 | 2,085,678 | 2,192,975  | 2,339,751  | 2,460,764  | 2,459,625  | 2,702,501  |
| Long term assets                                            | 7,158,107 | 7,559,112 | 7,809,330 | 8,056,836  | 8,419,462  | 8,862,310  | 9,395,994  | 9,856,132  |
| Total assets                                                | 8,937,513 | 9,477,359 | 9,895,008 | 10,249,811 | 10,759,213 | 11,323,073 | 11,855,620 | 12,558,633 |
| <b>Liabilities</b>                                          |           |           |           |            |            |            |            |            |
| Current liabilities                                         | 434,292   | 578,674   | 690,801   | 587,604    | 606,482    | 630,071    | 678,159    | 707,797    |
| Long term liabilities                                       |           |           |           |            |            |            |            |            |
| Debt (bonds and loans)                                      | 551,607   | 443,554   | 268,445   | 229,073    | 182,053    | 134,795    | 96,587     | 64,999     |
| Pension Fund Liabilities                                    | 1,839,828 | 1,901,455 | 1,939,562 | 1,978,984  | 2,021,589  | 2,064,756  | 2,109,095  | 2,155,441  |
| Other long term liabilities                                 | 504,874   | 504,874   | 504,874   | 504,874    | 504,874    | 504,874    | 404,874    | 354,874    |
| Total liability                                             | 3,330,600 | 3,428,557 | 3,403,682 | 3,300,535  | 3,314,998  | 3,334,496  | 3,288,715  | 3,283,111  |
| Equity                                                      | 5,606,913 | 6,048,802 | 6,491,326 | 6,949,277  | 7,444,215  | 7,988,577  | 8,566,905  | 9,275,522  |
| Total equity and liabilities                                | 8,937,513 | 9,477,359 | 9,895,008 | 10,249,811 | 10,759,213 | 11,323,073 | 11,855,620 | 12,558,633 |
| <b>CASHFLOW (w.o financing)</b>                             | 2,010     | 2,011     | 2,012     | 2,013      | 2,014      | 2,015      | 2,016      | 2,017      |
| Cashflow from operation                                     | 794,595   | 704,255   | 587,342   | 404,455    | 477,380    | 512,691    | 481,591    | 406,955    |
| Investment                                                  | 686,986   | 636,836   | 510,176   | 525,482    | 661,424    | 766,364    | 886,852    | 844,906    |
| Net cash before financing                                   | 107,609   | 67,419    | 77,166    | (121,027)  | (184,044)  | (253,673)  | (405,262)  | (437,951)  |

| <i>Table 22. Financial Indicators EAAB 2010-2017</i>   | 2,010 | 2,011 | 2,012 | 2,013 | 2,014 | 2,015 | 2,016 | 2,017 |
|--------------------------------------------------------|-------|-------|-------|-------|-------|-------|-------|-------|
| <b>Liquidity Indicators</b>                            |       |       |       |       |       |       |       |       |
| Current Ratio                                          | 4.1   | 3.3   | 3.0   | 3.7   | 3.9   | 3.9   | 3.6   | 3.8   |
| Quick ratio (acid test)                                | 3.3   | 2.7   | 2.4   | 2.9   | 3.0   | 3.0   | 2.7   | 2.8   |
| <b>Efficiency Indicators</b>                           |       |       |       |       |       |       |       |       |
| Receivables Turnover                                   | 8.22  | 8.22  | 8.22  | 8.22  | 8.22  | 8.22  | 8.22  | 8.22  |
| Labor productivity                                     | 1.12  | 1.12  | 1.12  | 1.12  | 1.12  | 1.12  | 1.12  | 1.12  |
| UPW                                                    | 34%   | 34%   | 34%   | 34%   | 34%   | 34%   | 34%   | 30%   |
| <b>Profitability Indicators</b>                        |       |       |       |       |       |       |       |       |
| Operating ratio                                        | 0.87  | 0.86  | 0.87  | 0.87  | 0.88  | 0.90  | 0.91  | 0.92  |
| Working ratio                                          | 0.44  | 0.44  | 0.44  | 0.44  | 0.44  | 0.47  | 0.49  | 0.49  |
| Profit Margin (net income/revenues)                    | 15%   | 14%   | 12%   | 12%   | 12%   | 10%   | 9%    | 9%    |
| Return on Assets (ROA) (net income/avg total assets)   | 2%    | 2%    | 2%    | 2%    | 2%    | 1%    | 1%    | 1%    |
| Return on Equity (ROE) (net income/avg Equity)         | 3%    | 3%    | 3%    | 2%    | 2%    | 2%    | 2%    | 2%    |
| (EBTDA) Operating margin (operating profit/revenues)   | 56%   | 56%   | 56%   | 56%   | 56%   | 53%   | 51%   | 51%   |
| (EBIT) Operating margin (operating profit/revenues)    | 13%   | 14%   | 13%   | 13%   | 12%   | 10%   | 9%    | 8%    |
| <b>Leverage/coverage</b>                               |       |       |       |       |       |       |       |       |
| Total Debt (including pension fund liabilities)/Equity | 0.59  | 0.57  | 0.52  | 0.47  | 0.45  | 0.42  | 0.38  | 0.35  |
| Total Debt (excluding pension fund liabilities)/Equity | 0.09  | 0.09  | 0.09  | 0.08  | 0.08  | 0.08  | 0.07  | 0.07  |
| EBIT/Interest expense                                  | 1.52  | 1.74  | 1.76  | 2.31  | 2.94  | 3.13  | 3.71  | 5.33  |
| EBITDA/Interest expense                                | 6.34  | 6.92  | 7.48  | 10.27 | 13.74 | 15.96 | 20.97 | 32.52 |

54. El margen operativo<sup>23</sup> es superior al 51% en todo el período. Si se incluyen las reservas para el fondo de pensión y la depreciación como parte de los costos operativos, la utilidad es cercana al 10% de los ingresos facturados. Los indicadores de liquidez también muestran grandes posibilidades de cumplir con las obligaciones a corto plazo. Los indicadores de deuda muestran que la relación apalancamiento/capital mejora con los años y pasará del nivel actual de 60/40 a 40/60 para 2015. Si los indicadores se calcularan sin el pasivo del fondo de pensión, el coeficiente sería de aproximadamente 10/90 para 2015.

55. **Análisis de sensibilidad.** Se evaluó el impacto sobre los resultados cuando se consideraron los cambios en las tarifas y en los niveles de tratamiento. Los resultados se muestran a continuación. Si las tarifas aumentan adecuadamente, como se indica anteriormente, la EAAB podrá mantener una estabilidad financiera razonable. Sin embargo, si las tarifas se mantienen constantes en términos reales, la EAAB sufrirá una crisis financiera y deberá obtener un financiamiento adicional de aproximadamente US\$91 millones.

| Millones de US\$                                                              | Beneficio neto |      | VNA     | Financiamiento adicional |
|-------------------------------------------------------------------------------|----------------|------|---------|--------------------------|
|                                                                               | 2010           | 2016 | 2010-24 | 2010-24                  |
| Costos de tratamiento en Salitre, Canoas y aumento de tarifas para ambos      | 78             | 20   | (525)   |                          |
| Costos de tratamiento en Salitre y Canoas <b>sin</b> aumento de tarifas       | 74             | (5)  | (615)   | (91)                     |
| Costos de tratamiento en Salitre, no en Canoas, <b>sin</b> aumento de tarifas | 78             | 21   | (542)   | (17)                     |
| Costos de tratamiento en Salitre, no en Canoas, <b>con</b> aumento de tarifas | 78             | 26   | (513)   | 11                       |

### C. TARIFAS DE AGUA Y DE AGUAS RESIDUALES DE LA EAAB

56. En el análisis financiero de la EAAB expuesto anteriormente, se indica que en 2016 la tarifa de agua combinada debería aumentar en al menos un 10% solo para cubrir los costos de operación y mantenimiento asociados con el tratamiento de aguas residuales en la planta (secundaria) Salitre y en la planta (primaria) Canoas. Debido a que en Colombia existe una estructura tarifaria diferenciada, en la que los estratos de ingreso más alto pagan más que los estratos de ingreso más bajo, el aumento porcentual real de las tarifas puede variar según los diferentes estratos. Además, Bogotá ya tiene tarifas de agua relativamente altas.

57. En el estudio de valoración contingente mencionado anteriormente en el presente anexo, se indicó que el monto promedio que los hogares estarían dispuestos a pagar es de US\$3 por mes. Suponiendo que el hogar promedio utiliza aproximadamente 15 metros cúbicos de agua por mes, los costos incrementales del tratamiento de aguas residuales son del orden de US\$2 por mes. Asimismo, los estratos más altos están dispuestos a pagar una cantidad considerablemente mayor (US\$7 por mes, en el caso de los estratos 5 y 6). Esto indica que los aumentos de las tarifas de agua para el tratamiento de aguas residuales son manejables desde el punto de vista político si se explican y gestionan debidamente. En las siguientes secciones se explican la situación general de las tarifas en Bogotá y el sistema reglamentario de precios de Colombia para situar estas cuestiones en un contexto más exacto.

<sup>23</sup> EBTDA/ingresos facturados.

## **C.1. Marco normativo de las tarifas de agua y aguas residuales en Colombia**

58. La CRA es el organismo que regula a los operadores de los servicios de abastecimiento de agua, aguas residuales y gestión de residuos en Colombia. La Ley 142 de 1994 creó la CRA y estableció las directrices sobre tarifas, que se rigen conforme a las resoluciones dictadas por la CRA. La metodología actual para aplicar las tarifas de agua y aguas residuales está establecida en la Resolución CRA 287 de 2004, en la que se establece: i) la fórmula para calcular los costos de la prestación de servicios y ii) el método para calcular las tarifas en función de los costos resultantes.

i) La *fórmula para calcular los costos* es la siguiente:

$$\text{Costo} = CMA + CMO + CMI + CMT$$

Donde:

CMA: costo administrativo promedio

CMO: costo operativo promedio

CMI: costo de inversión promedio

CMT: costo de tarifas ambientales promedio

- a) El CMA es el costo administrativo promedio por usuario. Este costo no incluye la depreciación ni todos aquellos costos relacionados con los fondos de pensión. El resultado se multiplica por un factor de eficiencia calculado por la CAR.
- b) El CMO es el costo operativo promedio por metro cúbico. El costo promedio del agua se calcula por metro cúbico producido, sin incluir el nivel de pérdidas de agua definido por la CRA. El costo promedio de las aguas residuales se calcula por metro cúbico de aguas residuales vertidas. Para ambas, agua y aguas residuales, el CMO consta de dos componentes: 1) una parte que corresponde a las características particulares del área donde se presta el servicio, tales como la energía y los productos químicos usados para el tratamiento del agua y de las aguas residuales, y 2) una parte que puede compararse con otros prestadores, tales como servicios de terceros, arrendamientos, seguros, mantenimiento, etc. Esta parte del costo se basa en el costo operativo del operador multiplicado por un factor de eficiencia calculado por la CRA. El CMO no incluye la depreciación ni todos aquellos costos relacionados con los fondos de pensión y pasivos laborales.
- c) El CMI es el costo de inversión promedio por metro cúbico. Incluye tres componentes: 1) inversiones en ampliación, rehabilitación y reemplazo; 2) valor del activo corriente, y 3) la inversión inmobiliaria. El promedio total se calcula a partir del monto del valor actualizado de cada componente dividido por el valor actualizado del volumen de agua consumida (o vertida) durante la vida útil promedio del activo. La CAR establece directrices para la inclusión de determinados tipos de inversiones y activos, así como el período de vida útil que debe considerarse.
- d) El CMT es el costo de tarifas ambientales promedio. En el caso del agua, consta de la tarifa por metro cúbico de agua utilizada dividida por uno menos el indicador de pérdidas de agua establecido por la CRA. En el caso de las aguas residuales, consta de la tasa de contaminación que se le cobra a los usuarios de acuerdo con las características de sus descargas.

ii) *Cómo calcular las tarifas en función de los costos*

Las tarifas corresponden al costo de la prestación del servicio, menos un subsidio (o más un recargo), según la categoría de los usuarios.

- a) *Estructura tarifaria.* Tanto para el servicio de agua como para el de aguas residuales, la estructura tarifaria consta de un cargo fijo por usuario y un cargo aplicado según el volumen, que se calcula por metro cúbico.
  - a. El cargo fijo equivale al costo administrativo promedio.
  - b. La tarifa aplicada según volumen equivale a la suma de los costos promedio de operación, inversión y tasas ambientales.
- b) *Subsidios y recargos.* Las directrices sobre subsidios y recargos son las siguientes:
  - a. Los subsidios se aplican solo al cargo fijo mensual y al primer bloque de consumo, el cual corresponde a un consumo mensual básico por hogar.
  - b. La CRA establece el porcentaje máximo de subsidios que deben aplicarse a las tarifas de usuarios de ingreso bajo. El subsidio deberá cancelarse con recargos en las tarifas en el caso de usuarios de ingreso alto, así como también en el caso de usuarios industriales y comerciales. La CRA establece los topes del subsidio (como un porcentaje máximo del costo) y de los recargos (como un porcentaje mínimo del costo). El operador tiene autonomía para fijarlos dentro de estos límites. El operador toma una decisión en función de la composición del mercado, buscando un equilibrio entre los subsidios y los recargos. En las zonas pobres, esto no siempre es posible y se requiere una transferencia del Gobierno local. Cuando el Gobierno nacional otorga un subsidio, se lo incluye en el fondo utilizado para cancelar el subsidio a las tarifas.
  - c. Los usuarios residenciales se clasifican en seis niveles de estratos, como indicador sustituto de su nivel de ingreso, de los cuales el más bajo es el estrato 1. Los usuarios residenciales clasificados como estrato 4 pagan la totalidad del costo de la prestación del servicio, mientras que los estratos 1, 2 y 3 reciben subsidios, y los estratos 5 y 6, al igual que los usuarios industriales y comerciales, pagan un recargo.
  - d. El subsidio solo se aplica al primer bloque de consumo, el cual corresponde a un consumo mensual básico por hogar. El tope para los subsidios es el siguiente: el estrato 1 puede recibir un subsidio de hasta el 70% del costo; el estrato 2, de hasta el 40%, y el estrato 3, de hasta el 15%.
  - e. El recargo mínimo es el siguiente: estrato 5, 50%; estrato 6, 60%; usuarios industriales, 30%, y usuarios comerciales, 50%.
- c) *Pasos que deben cumplirse en la implementación de tarifas:*  
El operador debe cumplir con los siguientes pasos: i) calcular y aprobar el costo de la prestación del servicio y las tarifas correspondientes, e ii) informar a la comunidad, la SSPD y el ente regulador (la CRA).

## **C.2. Tarifas y subsidios de la EAAB**

59. Las tarifas actuales en Bogotá según la metodología establecida por la CAR son las siguientes:

| EAAB (junio de 2009) | TARIFAS DE AGUA                  |                                             |                     | TARIFAS DE ALCANTARILLADO        |                                          |                     |
|----------------------|----------------------------------|---------------------------------------------|---------------------|----------------------------------|------------------------------------------|---------------------|
|                      | Cargo fijo<br>\$/usuario/<br>mes | Cargo por consumo<br>(CO\$/m <sup>3</sup> ) |                     | Cargo fijo<br>\$/usuario/<br>mes | Cargo por consumo (CO\$/m <sup>3</sup> ) |                     |
|                      |                                  | Primer<br>bloque                            | Consumo<br>superior |                                  | Primer<br>bloque                         | Consumo<br>superior |
| RESIDENCIAL          |                                  |                                             |                     |                                  |                                          |                     |
| Estrato 1            | 1952                             | 663                                         | 2210                | 995                              | 406                                      | 1354                |
| Estrato 2            | 3904                             | 1326                                        | 2210                | 1989                             | 813                                      | 1354                |
| Estrato 3            | 5595                             | 1901                                        | 2210                | 2918                             | 1192                                     | 1354                |
| Estrato 4            | 6506                             | 2210                                        | 2210                | 3315                             | 1354                                     | 1354                |
| Estrato 5            | 14 574                           | 3404                                        | 3404                | 8255                             | 2031                                     | 2031                |
| Estrato 6            | 17 827                           | 3625                                        | 3625                | 11 471                           | 2167                                     | 2167                |
| NO RESIDENCIAL       |                                  |                                             |                     |                                  |                                          |                     |
| Industrial           | 8458                             | 3050                                        | 3050                | 4343                             | 1937                                     | 1937                |
| Comercial            | 9760                             | 3315                                        | 3315                | 4973                             | 2031                                     | 2031                |
| Oficial              | 6506                             | 2210                                        | 2210                | 3315                             | 1354                                     | 1354                |

60. La tarifa para los usuarios en el estrato 4 corresponde al costo de la prestación del servicio tanto de agua como de aguas residuales. El subsidio otorgado a los estratos más bajos oscila entre un 70% (estrato 1) y un 14% (estrato 3), mientras que los recargos varían entre un 31% (cargo fijo mensual para aguas residuales en el caso de los usuarios industriales) y un 246% (cargo fijo para aguas residuales en el caso del estrato 6).

| EAAB (junio de 2009) | Límites<br>CRA | SUBSIDIO Y RECARGO<br>(%) EN TARIFAS DE AGUA |                                             |                     | SUBSIDIO RECARGO (%) EN<br>TARIFAS DE ALCANTARILLADO |                                             |                     |
|----------------------|----------------|----------------------------------------------|---------------------------------------------|---------------------|------------------------------------------------------|---------------------------------------------|---------------------|
|                      |                | Cargo fijo                                   | Cargo por consumo<br>(CO\$/m <sup>3</sup> ) |                     | Cargo fijo<br>\$/usuario/<br>mes                     | Cargo por consumo<br>(CO\$/m <sup>3</sup> ) |                     |
|                      |                |                                              | Primer<br>bloque                            | Consumo<br>superior |                                                      | Primer<br>bloque                            | Consumo<br>superior |
| RESIDENCIAL          |                |                                              |                                             |                     |                                                      |                                             |                     |
| Estrato 1            | <= 70%         | -70%                                         | -70%                                        | 0%                  | -70%                                                 | -70%                                        | 0%                  |
| Estrato 2            | <= 40%         | -40%                                         | -40%                                        | 0%                  | -40%                                                 | -40%                                        | 0%                  |
| Estrato 3            | <= 15%         | -14%                                         | -14%                                        | 0%                  | -12%                                                 | -12%                                        | 0%                  |
| Estrato 4            |                | 0%                                           | 0%                                          | 0%                  | 0%                                                   | 0%                                          | 0%                  |
| Estrato 5            | >= 50%         | 124%                                         | 54%                                         | 54%                 | 149%                                                 | 50%                                         | 50%                 |
| Estrato 6            | >= 60%         | 174%                                         | 64%                                         | 64%                 | 246%                                                 | 60%                                         | 60%                 |
| NO RESIDENCIAL       |                |                                              |                                             |                     |                                                      |                                             |                     |
| Industrial           | >= 30%         | 30%                                          | 38%                                         | 38%                 | 31%                                                  | 43%                                         | 43%                 |
| Comercial            | >= 50%         | 50%                                          | 50%                                         | 50%                 | 50%                                                  | 50%                                         | 50%                 |
| Oficial              |                | 0%                                           | 0%                                          | 0%                  | 0%                                                   | 0%                                          | 0%                  |

61. A continuación se indican las tarifas promedio resultantes correspondientes a cada categoría de usuario:

| TARIFAS<br>PROMEDIO<br>DE LA EAAB | (CO\$/m <sup>3</sup> ) |                |                          | (US\$/m <sup>3</sup> ) |                |                          |
|-----------------------------------|------------------------|----------------|--------------------------|------------------------|----------------|--------------------------|
|                                   | Agua                   | Alcantarillado | Agua y<br>alcantarillado | Agua                   | Alcantarillado | Agua y<br>alcantarillado |

|                      |      |      |      |      |      |      |
|----------------------|------|------|------|------|------|------|
| <b>RESIDENCIAL</b>   |      |      |      |      |      |      |
| Estrato 1            | 814  | 483  | 1298 | 0,42 | 0,25 | 0,67 |
| Estrato 2            | 1618 | 961  | 2579 | 0,83 | 0,49 | 1,32 |
| Estrato 3            | 2297 | 1398 | 3695 | 1,18 | 0,72 | 1,89 |
| Estrato 4            | 2631 | 1569 | 4200 | 1,35 | 0,80 | 2,15 |
| Estrato 5            | 4280 | 2528 | 6808 | 2,19 | 1,30 | 3,49 |
| Estrato 6            | 4456 | 2702 | 7157 | 2,28 | 1,39 | 3,67 |
| <b>NORESIDENCIAL</b> |      |      |      |      |      |      |
| Industrial           | 3109 | 1967 | 5076 | 1,59 | 1,01 | 2,60 |
| Comercial            | 3745 | 2251 | 5996 | 1,92 | 1,15 | 3,07 |
| Oficial              | 2228 | 1364 | 3592 | 1,14 | 0,70 | 1,84 |

62. Cuando se comparan las tarifas de la EAAB con las de otras ciudades grandes en Colombia, tales como Medellín, Cali y Barranquilla, las tarifas de agua en Bogotá resultan ser las más elevadas para todos los usuarios, tanto los de categoría residencial como no residencial.

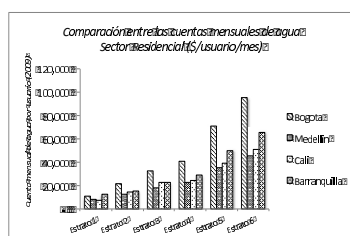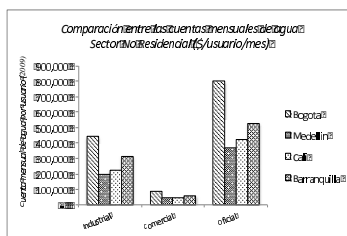

63. En el caso de las aguas residuales, la situación es diferente. Las tarifas en Bogotá son más bajas que en Medellín y Cali para todas las categorías de usuarios, excepto los estratos 5 y 6. El motivo por el cual las tarifas difieren de una ciudad a otra es el costo de la prestación de los servicios. El costo del sector del agua en Bogotá es el más elevado: supera al de Medellín en un 80%, al de Cali en un 65% y al de Barranquilla en un 42%. Con respecto al servicio de aguas residuales, las diferencias son menores: el costo en Bogotá es un 8% más bajo que en Medellín, muy similar al de Cali y un 59% más elevado que en Barranquilla. Cuando Bogotá ajuste el costo con el tratamiento de aguas residuales en Salitre, su costo será muy similar al de Medellín, un 15% más elevado que el de Cali y un 80% más elevado que el de Barranquilla.

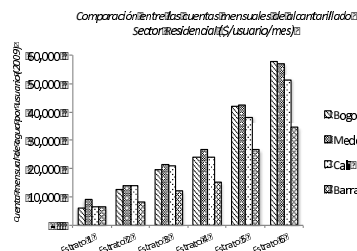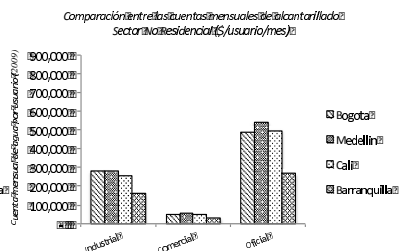

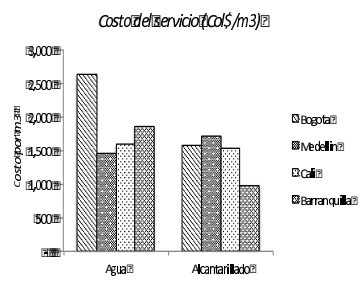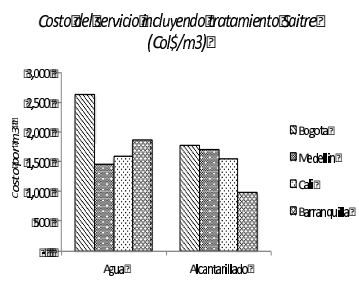

**Anexo 10: Cuestiones relativas a las políticas de salvaguardia**  
**COLOMBIA: Proyecto de Adecuación Hidráulica y Recuperación Ambiental del**  
**Río Bogotá**

**A. Introducción a la evaluación ambiental**

1. En el presente anexo, se resumen las conclusiones y recomendaciones de la EA, el análisis del impacto social y la planificación del reasentamiento que se elaboraron para el proyecto propuesto. Se presentan una breve descripción de los procesos de evaluación ambiental y social; la documentación principal que se preparó; el marco legal e institucional que rige el proyecto; las alternativas consideradas, tanto estratégicas como específicas al proyecto; los posibles efectos ambientales asociados con la ejecución y las operaciones del proyecto, y las medidas principales de gestión y mitigación propuestas para resolver aquellas cuestiones derivadas de las EA<sup>24</sup>.

2. *Elaboración de la EA.* La EA fue elaborada bajo la dirección general de la Subdirección de Desarrollo Ambiental Sostenible (SDAS) de la CAR. La SDAS movilizó y facilitó el trabajo de consultores individuales especializados en ingeniería ambiental, biología de la conservación y arquitectura paisajista, entre otros, a fin de elaborar el informe final. La CAR, en consulta con el equipo de trabajo del Banco y el equipo encargado de la preparación de la EA, determinó el alcance de la labor y elaboró los términos de referencia de la EA. Estos términos de referencia fueron examinados en reuniones de consultas públicas que tuvieron lugar el 5 de marzo de 2009 y en las que participaron representantes de una gran variedad de partes interesadas (véase la sección sobre consultas y divulgación). La metodología para el análisis de impacto de la EA del proyecto utilizó procedimientos conocidos y aceptados ampliamente y se cruzaron los datos del alcance de la labor con las directrices técnicas del Organismo Japonés de Cooperación Internacional para la EA de las PTAR a fin de asegurar la coherencia con las buenas prácticas internacionales. Además, una parte importante de la tarea de la EA consiste en la consolidación y síntesis de informes técnicos independientes elaborados por otros ingenieros consultores, directores de recursos hídricos y planificadores regionales cuyo trabajo fue realizado de manera independiente del proyecto financiado por el Banco.

3. El borrador avanzado de la EA fue presentado en una reunión de consultas públicas el 16 de septiembre de 2009, y se recibieron comentarios y observaciones detallados y se incorporaron al texto final de la EA. Asimismo, la CAR encargó otros exámenes detallados a dos expertos independientes no vinculados con el proyecto. Estos evaluadores incluían un ingeniero ambiental experimentado y un especialista en medio ambiente de The Nature Conservancy. La SDAS elaboró un breve informe que consolida los comentarios de estos evaluadores expertos y tomó medidas para incorporar muchas de las sugerencias presentadas por los evaluadores. Cuando no fue posible incorporar las observaciones, la CAR dio una explicación explícita de por qué no se incluyeron esos comentarios en el texto final. El proceso de elaboración de la EA ha sido muy transparente y todos los comentarios recibidos se han dado a conocer a través del sitio web de la CAR.

---

<sup>24</sup> El presente anexo se basa en documentos preparados por la prestataria, incluidos los siguientes: el documento de EA compuesto de tres volúmenes y el material de referencia clave contenido en dicho documento, en especial el relativo a los resultados de los modelos numéricos de la calidad del agua de la cuenca del río Bogotá, así como los estudios previos de impacto ambiental sobre obras específicas propuestas para el tratamiento en Salitre y la licencia otorgada a esa planta.

4. Por último, cabe destacar que se realizará un importante análisis ambiental complementario durante la ejecución del proyecto a fin de contribuir a la sostenibilidad ambiental del río Bogotá, e incluirá la elaboración de i) un plan de gestión integral de recursos hídricos para la cuenca del río Bogotá; ii) un plan maestro de biosólidos para la región metropolitana de Bogotá Distrito Capital, y iii) un plan de gestión de ríos para el río Bogotá. Todos estos estudios, incluidos los aspectos ambientales, estarán a cargo de consultores independientes, bajo la supervisión de la CAR.

5. **Proceso de EA.** Los riesgos, efectos y beneficios ambientales del proyecto han sido analizados en dos niveles diferentes mediante la utilización de un enfoque integrado para la EA. Las tres partes en las que se divide la EA son las siguientes:

6. En el volumen I de la EA, se describe el contexto regional y estratégico del proyecto propuesto. Se presentan datos de referencia a nivel de la cuenca del río Bogotá, se describen las principales amenazas a la calidad del agua de la región y se evalúan las estrategias más importantes propuestas por la CAR y otras autoridades para abordar estas inquietudes. El volumen I fue elaborado con la orientación general de la CAR y corresponde a una evaluación de los riesgos y beneficios ambientales a nivel regional y de la totalidad de la cuenca.

7. En el volumen I, también se describen las condiciones de referencia de la cuenca del río Bogotá, el contexto legal e institucional, y los desafíos y las opciones estratégicas que respaldan la elección de los componentes específicos del proyecto y las actividades de inversión. Esta sección de la EA se utilizó para evaluar los objetivos estratégicos regionales del proyecto y para proporcionar una justificación clara respecto de los componentes del proyecto que responden a estos objetivos. En la EA además se describe la estructura del proyecto en su conjunto, y se incluyen una descripción detallada de los riesgos y beneficios ambientales de los tres componentes del proyecto y los mecanismos institucionales para ejecutar el PGA para el proyecto.

8. En el volumen II de la EA, se describen y evalúan los posibles riesgos, beneficios e impactos ambientales asociados con las inversiones específicas propuestas conforme al componente 1 (Mejoramiento y ampliación de la planta de tratamiento Salitre) y al componente 2 (Obras para el control de inundaciones y de recuperación ambiental del río Bogotá) del proyecto. Se presentan datos de referencia para la zona de influencia del proyecto, se evalúan los valores ambientales principales que pueden verse afectados por el proyecto y se indican las actividades del proyecto que se consideran que presentan beneficios, impactos y riesgos ambientales importantes.

9. En el volumen III de la EA, se presenta un PGA que describe la variedad de impactos, las principales medidas de mitigación y gestión de dichos impactos, y los mecanismos institucionales para ejecutar el plan. La CAR elaboró la EA en 2009 y la dio a conocer en el ámbito nacional<sup>25</sup>. El equipo del Banco evaluó la EA y la consideró aceptable y coherente con los requisitos de las políticas de salvaguardia del Banco Mundial.

10. La CAR aborda los aspectos sociales del proyecto en el volumen II de la EA y en el PAR. En el volumen II, se describen las características sociales y económicas de la zona de influencia del proyecto, incluidos la distribución demográfica, los sistemas de producción, la mano de obra, las organizaciones familiares y el nivel de vida. Asimismo, en la EA también

---

<sup>25</sup> La evaluación de impacto ambiental del proyecto se encuentra disponible en el sitio web de la CAR.

se identifican las principales partes interesadas y sus percepciones y posturas sobre el proyecto, se destacan los canales de comunicación existentes, se señalan los impactos sociales generales, y se evalúan los diversos riesgos. La adquisición de tierras y el reasentamiento son los impactos sociales negativos más importantes relacionados con el proyecto. Por lo tanto, la CAR preparó un PAR integral para cumplir con la Política de Reasentamiento Involuntario (OP 4.12) del Banco. El PAR incluye los siguientes elementos: censo rural y análisis socioeconómico de la zona de influencia directa del proyecto; marco legal e institucional; valoración de las pérdidas e indemnización; medidas de reasentamiento y planes de ejecución; estrategia de consultas, y mecanismo de seguimiento y evaluación.

11. El resumen de las condiciones socioeconómicas incluidas en la EA se basó en documentación disponible y en consultas a las partes interesadas pertinentes. Con respecto al PAR, se llevó a cabo un proceso más complejo a fin de elaborar un documento de planificación y gestión adecuado para utilizarse durante la adquisición de tierras y el reasentamiento físico. El componente 2 requiere la compra de porciones de tierras de 211 parcelas, la mayoría de las cuales se ubican en zonas rurales y son propiedad de productores e instituciones del Gobierno. Sin embargo, en una zona urbana del tramo C de las obras propuestas para el río, será necesario el reasentamiento físico de familias, ninguna de las cuales tiene los títulos de propiedad legítimos de las tierras. En el PAR se están desarrollando tres estrategias distintas para contemplar los diferentes tipos de uso de la tierra: i) las parcelas del Gobierno que se transferirán a la CAR mediante acuerdos administrativos; ii) las parcelas privadas que la CAR adquirirá, y iii) el reasentamiento de familias sin un título de propiedad válido que se encuentren en asentamientos urbanos ilegales a lo largo del río. La elaboración del PAR se encuentra respaldada por los resultados de las consultas públicas, las reuniones con los propietarios, los estudios socioeconómicos, los estudios sobre la tenencia de las tierras y las encuestas rurales.

## **B. Contexto estratégico para la calidad de agua en la cuenca del río Bogotá**

12. *Condiciones de referencia.* El río Bogotá está ubicado en el departamento colombiano de Cundinamarca. Nace a una altura de 3400 metros en el municipio de Villapinzón y recorre 370 kilómetros antes de unirse con el río Magdalena, a una altura de 280 metros, en el municipio de Girardot. La cuenca cubre 6000 kilómetros cuadrados y abarca 45 municipios y Bogotá Distrito Capital, por lo que las autoridades en materia ambiental son la CAR y la SDA. El río Bogotá es esencial para el Departamento de Cundinamarca, ya que constituye una fuente de agua potable en la cuenca superior y se utiliza para diversos fines, tales como actividades agrícolas y ganaderas, y la generación de electricidad.

13. Uno de los principales problemas que enfrenta el río Bogotá es el ingreso de aguas residuales sin tratar a lo largo del límite oeste de la ciudad de Bogotá. En esta sección, la ciudad de Bogotá, con una población de alrededor de 6,7 millones de habitantes, vierte todas sus aguas residuales en el río Bogotá a través de tres afluentes principales: los ríos Salitre, Fucha y Tunjuelo. El caudal promedio del río antes de ingresar a la ciudad es de 12 metros cúbicos/segundo, y Bogotá vierte 22 metros cúbicos/segundo adicionales de aguas residuales, de las cuales solo el 20% recibe tratamiento primario en la PTAR Salitre, ubicada al norte de la ciudad. Como consecuencia, el río está muy contaminado, no contiene oxígeno disuelto y presenta niveles altos de patógenos. Desde 1950, el rápido desarrollo urbano no solo ha producido el deterioro de la calidad del agua del río, sino también la canalización del río, la destrucción de los humedales y el crecimiento de comunidades de ingreso bajo a lo largo del río que son propensas a las inundaciones.

14. La CAR, la autoridad regional en materia ambiental a cargo de la cuenca hidrográfica del río Bogotá, ha emprendido un proyecto integral de recuperación del río en la zona urbana conforme a la estrategia general del Gobierno nacional para recuperar el río Bogotá, y está elaborando el proyecto para el financiamiento del Banco Mundial. El objetivo de desarrollo del proyecto propuesto es transformar la cuenca media del río Bogotá en un activo ambiental para la región metropolitana mejorando la calidad del agua, reduciendo el riesgo de inundaciones, recuperando los hábitats ribereños y creando áreas multifuncionales a lo largo del río que constituyan hábitats ecológicos, espacios disponibles para uso público y un lugar para disfrutar del río en la zona urbana. Las actividades principales del proyecto incluyen: i) la ampliación de una PTAR para mejorar la calidad del agua del río y complementar el abastecimiento de agua de las zonas agrícolas próximas; ii) la mejora de las obras tradicionales para el control de las inundaciones mediante el dragado del río, la modificación del perfil y la construcción de un terraplén contra inundaciones; iii) mejoras ambientales, tales como la ampliación y protección de la zona ribereña, la recuperación de los meandros y humedales del río, el diseño de paisajes y parques para crear zonas multifuncionales a lo largo del río Bogotá, y iv) la realización de un programa de asistencia técnica y estudios de planificación para completar planes operacionales de larga duración y aumentar las inversiones del proyecto.

15. La cuenca del río Bogotá comprende 19 subcuencas de variados tamaños e importancia. Las condiciones físicas, biológicas, sociales y económicas de las subcuencas que conforman la cuenca del río Bogotá varían considerablemente y se caracterizan por un alto grado de diversidad respecto de indicadores clave como nivel de desarrollo, urbanización y uso de la tierra. A los fines de la gestión, la CAR reconoce, además, que el río Bogotá puede dividirse en las regiones de la cuenca superior, la cuenca media y la cuenca inferior. El brazo principal del río Bogotá tiene una longitud de aproximadamente 308 kilómetros y corre desde el municipio de Villapinzón (3300 metros sobre el nivel del mar) hasta la confluencia con el río Magdalena, en la ciudad de Girardot (280 metros sobre el nivel del mar).

16. La calidad del agua del río Bogotá se caracteriza por un alto grado de contaminación, que puede observarse en todo su recorrido. La cuenca media del río Bogotá tiene como característica representativa su proximidad al centro urbano de Bogotá (el cual crece desordenadamente), pequeñas ciudades y paisajes agrícolas diversos. En toda la cuenca, la zona está sujeta a un uso de la tierra muy dinámico, que cambia en forma acelerada.

17. La zona de la cuenca del río es una compleja combinación donde se mezclan las zonas urbanas industriales, la generación de energía, la agroindustria, la agricultura intensiva de riego y la agricultura extensiva, como las zonas de pastoreo. En distinta medida, todas estas actividades compiten por el uso de los recursos hídricos y todas contribuyen a la degradación y al deterioro de la calidad general del agua. La combinación de estas actividades representa una pesada carga para el río Bogotá y sus afluentes en lo que se refiere a la asimilación de los altos niveles de contaminación del agua de tipo doméstica, industrial y de fuentes no puntuales. El crecimiento futuro de estas actividades garantiza un aumento en la demanda de agua y una gestión de la calidad del agua sin intervenciones directas cada vez más difícil.

18. A pesar de su desarrollo intensivo, la cuenca en su conjunto continúa ofreciendo valores ambientales y muchas oportunidades de recreación, al haber parques y espacios

recreativos amplios cerca del río. Existen zonas con valor paisajístico y es común ver personas aprovechando las oportunidades de recreación que ofrecen los parques urbanos, tales como caminar, andar en bicicleta y otros deportes.

19. Una característica reconocida de la cuenca del río Bogotá, especialmente en la región de Bogotá, son los amplios e importantes humedales. Estas áreas han sido históricamente importantes como hábitats para muchas especies, por su potencial recreativo y ahora por su potencial para actuar como una parte integrante de la estrategia regional de gestión de la calidad del agua. Apenas en 1950, había alrededor de 50 000 hectáreas de humedales incluidas en el sistema del río Bogotá. En la actualidad, estas zonas se han reducido a menos de 1000 hectáreas. En el volumen I de la EA, se identifican no menos de 10 humedales de importancia regional. Todos los humedales tienen el potencial de servir para diversos propósitos y son reconocidos por diversas ONG activas en la zona.

Además del contexto económico, social y ambiental de la cuenca, es importante reconocer los riesgos significativos que provocan las inundaciones recurrentes en la zona. La combinación de fuertes precipitaciones, capas freáticas altas y escorrentía limitada en la región de Bogotá implica que muchas partes de la cuenca estén sujetas a inundaciones repetidas y graves. Estas inundaciones exacerban los problemas de las capas freáticas altas en muchas partes de la cuenca media cerca de Bogotá y ocasionan daños generalizados que afectan la subsistencia y las estructuras. El nivel actual de protección contra inundaciones está basado en una norma de diseño para caudales con un período de retorno de 25 años. Las nuevas obras para el control de inundaciones se desarrollarán con un diseño apto para caudales con un período de retorno de 100 años.

20. **Objetivos de gestión de la calidad del agua.** La calidad del agua de la cuenca del río Bogotá exhibe diversos grados de degradación según dónde y cuándo se tomen las muestras. En términos generales, la calidad del agua se deteriora cada vez más a medida que se avanza desde la cuenca de captación superior en dirección a la cuenca media, densamente poblada, y hacia la cuenca inferior. En todo el largo del río Bogotá, los datos recogidos mediante las actividades de seguimiento de la calidad del agua indican un alto contenido orgánico y grandes cantidades de nutrientes, bajo nivel de oxígeno disuelto y niveles altos de patógenos acuáticos. Estos niveles de contaminación aumentan a medida que el río se acerca y atraviesa la región de Bogotá. Cierta atenuación del deterioro de la calidad del agua se torna aparente en los tramos inferiores, a medida que uno se acerca a la ciudad de Girardot (en la confluencia del río Bogotá y el río Magdalena), pero el grado de dilución depende, en gran medida, de la estación del año. los niveles de precipitaciones, la escorrentía y de si la central de energía ubicada en el Muña está generando electricidad.

21. La CAR y el Gobierno de Colombia tienen una visión general para la gestión de la cuenca expresada a través del POMCA. En función del POMCA, la CAR ha establecido objetivos ambiciosos relativos a la calidad del agua. Actualmente, el objetivo es alcanzar los parámetros de calidad del agua de clase IV (es decir, apta para usos agrícolas) hasta las compuertas de Alicachín. Se prevén los parámetros de la clase V para los tramos del río después de Alicachín.

22. **Marco legal e institucional.** El contexto legal e institucional para la gestión de la cuenca del río Bogotá es complejo e involucra múltiples jurisdicciones y una variedad de organismos de los Gobiernos nacional y locales. Existen numerosos organismos gubernamentales competentes dentro de la cuenca hidrográfica del río Bogotá que coexisten en los ámbitos nacional, regional y local. Estos se tornan aún más complicados por una

variedad de leyes y decretos del Gobierno que conforman el marco institucional general respecto de la gestión de los recursos hídricos y de la calidad del agua. Cada uno de estos organismos gubernamentales es responsable o tiene competencia para entender en algunos aspectos referidos a los recursos hídricos o sus zonas de influencia. La complejidad institucional deriva de la necesidad de crear un entorno de coordinación que permita la coherencia legal e institucional a fin de implementar la gestión integrada de los recursos hídricos. En el volumen I de la EA, se proporciona una descripción detallada del marco institucional para la gestión de la cuenca del río Bogotá, se evalúan las fortalezas y debilidades del régimen institucional general y se realizan recomendaciones para futuras mejoras.

23. ***Posibles impactos regionales y acumulados.*** La probabilidad de que la estrategia ambiental general relativa al río Bogotá cumpla con los objetivos a largo plazo dependerá de la eficacia combinada de todos los diversos programas. Esto incluye la construcción, la operación y el mantenimiento de plantas municipales de tratamiento de aguas residuales en el tramo superior; la construcción de la PTAR Canoas, y otras iniciativas de control de la contaminación de fuentes puntuales y no puntuales. El éxito de la estrategia también dependerá, en parte, de las tendencias de crecimiento y desarrollo en la cuenca, así como de otros grandes proyectos de desarrollo que se estén preparando o planificando. La compleja interacción de estos distintos factores puede tener un importante impacto regional o acumulado que una única entidad de proyectos no puede abordar.

24. ***Estrategia para la cuenca media del río Bogotá.*** Como se mencionó anteriormente, se prevé que el proyecto contribuirá a mejorar significativamente la calidad del agua en la cuenca media y la calidad de vida de las personas que viven en las inmediaciones del río Bogotá. Uno de los indicadores de desempeño clave del proyecto es otorgar al río Bogotá en la cuenca media la clase IV en la clasificación de la calidad del agua, la cual corresponde al uso agrícola y ganadero. A fin de determinar si esto es alcanzable con las mejoras propuestas y cómo otros programas de aguas residuales podrían afectar potencialmente los resultados anticipados, se llevó a cabo una simulación de la calidad del agua en función de un pronóstico de caudales de aguas residuales para los próximos 20 años.

25. ***Análisis de alternativas estratégicas.*** Se analizaron las alternativas para el proyecto tanto a nivel estratégico como a nivel específico del emplazamiento a través de la evaluación de alternativas para cada una de las obras civiles propuestas. A nivel estratégico, además de la alternativa que excluye el proyecto, en el volumen I de la EA, se evalúan los riesgos que supone no alcanzar la clase IV en la cuenca media a través de diferentes escenarios, incluidos los niveles de tratamiento de las aguas residuales y la ejecución de otros programas en materia de aguas residuales fuera del alcance del proyecto. Además, se revisaron y analizaron los tres programas de tratamiento de aguas residuales para la ciudad de Bogotá (de una planta, de dos plantas y de tres plantas), desarrollados en distintos documentos técnicos, y los resultados se resumen en la EA. A nivel de proyecto, se analizaron alternativas para cada una de las inversiones específicas en obras civiles conforme al componente 1 y al componente 2 respecto de sus configuraciones técnicas, tales como ubicación, normas de diseño y nivel de tratamiento.

26. ***Alternativas consideradas.*** Las alternativas estratégicas para el río Bogotá han sido elaboradas a través de una larga historia de debate y análisis entre las partes interesadas principales. Las opciones consideradas incluían la propuesta de construir una planta y tres plantas de tratamiento, así como la opción seleccionada de construir dos plantas. Se han analizado alternativas específicas en el contexto de la planificación de recursos hídricos y

regionales y se evaluaron las opciones a nivel de la planta de tratamiento y de las obras para el control de las inundaciones. La CAR, a través del proceso de EA para los componentes 1 y 2, describió las alternativas específicas en cuanto al emplazamiento y a la alineación del río. Se consideraron alternativas de tratamiento para Salitre conforme al estudio de consultoría de fase I de la CAR.

27. Respecto de las obras para el control de las inundaciones, se evaluaron alternativas de protección para la situación actual (período de retorno de entre 10 y 25 años) y para un caudal con un período de retorno de 100 años. En la EA también se evaluaron dos enfoques de diseño para el control de inundaciones: i) obras típicas de control de inundaciones urbanas que se concentran solo en aumentar la profundidad del canal y construir un terraplén, y ii) un enfoque de recuperación integral del río en la zona urbana que incorpora el diseño ecológico en las obras para el control de inundaciones, a fin de crear zonas ribereñas y mantener una conexión hidráulica con humedales vecinos. Estas alternativas y sus consecuencias ambientales se analizan en detalle en el volumen II de la EA.

28. **La alternativa seleccionada.** El Gobierno de Colombia decidió, principalmente en función de un estudio técnico realizado en 2003 por la EAAB, que la opción más conveniente era contar con dos PTAR (una en Salitre y otra en Canoas) para atender las necesidades de tratamiento de aguas residuales de la ciudad de Bogotá. Este plan luego fue respaldado por el DNP y el MAVDT en el documento CONPES 3320. El equipo de trabajo del Banco examinó las consideraciones técnicas existentes para la decisión relativa a las dos plantas y se llegó a la conclusión de que este era el mejor enfoque en función de las cuestiones económicas, ambientales, normativas y de políticas existentes. Respecto del nivel de tratamiento de la planta, los resultados de los modelos de la calidad del agua que figuran en la EA respaldan las decisiones relativas a la licencia ambiental de ampliar la planta e incluir un nivel de tratamiento secundario a fin de cumplir con los objetivos de la calidad del agua. La alineación seleccionada para el río produce el mínimo impacto en el reasentamiento involuntario, y la selección del diseño apto para inundaciones con un período de retorno de 100 años brinda la protección necesaria a las zonas vulnerables.

### **C. Condiciones de referencia ambientales y sociales en la zona de influencia del proyecto**

29. **General.** En la totalidad de los tramos medios, el río Bogotá presenta los problemas de calidad del agua más notables de la región de la gran Bogotá, y probablemente de todo el país. En una encuesta realizada en 2008 a los residentes de Bogotá, la contaminación del río Bogotá fue calificada como el segundo problema ambiental más urgente de la ciudad, luego de la congestión de tránsito. Durante muchos años, el río Bogotá se ha utilizado como una alcantarilla abierta para una gran parte de la ciudad de Bogotá. Desde 1950, el rápido desarrollo urbano no solo ha producido el deterioro de la calidad del agua del río, sino también la canalización del río, la destrucción de los humedales y el crecimiento de comunidades de ingreso bajo a lo largo del río que son propensas a las inundaciones, en especial en las localidades de Kennedy, Bosa, Engativá y Suba.

30. **Zona de influencia del proyecto.** En el sentido estratégico más amplio, la zona de influencia es la cuenca del río Bogotá. La EA define la zona de influencia directa del proyecto como el emplazamiento que cubre la ampliación de la PTAR Salitre, la zona de la llanura aluvial definida por las obras a lo largo del río para la protección contra inundaciones con un período de retorno de 100 años, 68 kilómetros entre Puente La Virgen y Alicachín y las propiedades afectadas por la adquisición de tierras o la reubicación física. La zona de

influencia directa incluye las veredas y las unidades de planificación cerca del río Bogotá. La zona de influencia indirecta comprende todo municipio donde se realicen las obras. Mientras que en el volumen I de la EA se abordan cuestiones a escala regional, en el volumen II se abordan los beneficios, riesgos e impactos que se prevé que ocurrirán dentro de la zona de influencia directa.

31. **Contexto demográfico y de desarrollo.** El tramo medio de la cuenca del río Bogotá alberga una gran concentración de zonas urbanas densamente pobladas, una combinación de zonas dedicadas a la agricultura intensiva y extensiva, zonas de recreo y muchos centros industriales. En la zona media hay cuatro municipios, y allí también se encuentra la ciudad de Bogotá, con una población de aproximadamente 7 millones de habitantes, la cual, según se prevé, crecerá un 50% en 2020. La distribución de la población en la cuenca se ha desarrollado más como resultado de una evolución orgánica de la ubicación de los asentamientos, las empresas y la industria, y no como consecuencia de una distribución lógica o una planificación cuidadosa de los usos de las tierras y los servicios urbanos. La zona de influencia directa del proyecto tiene una población de aproximadamente 3 936 597 habitantes, y comprende 4 municipios (Soacha, Mosquera, Cota y Funza) y 5 localidades dentro de Bogotá Distrito Capital.

32. **Calidad del agua.** El deterioro considerable de la calidad del agua superficial de la cuenca del río Bogotá y de la mayoría de sus afluentes en los tramos medios del río es el resultado de décadas de descargas de contaminantes no controladas o con un tratamiento deficiente. El brazo de 68 kilómetros del río Bogotá y sus afluentes han recibido aguas residuales domésticas, descargas orgánicas, sustancias minerales e inorgánicas, metales pesados, plaguicidas, fungicidas, herbicidas y sedimentos en cantidades que superan ampliamente la capacidad de dilución y autopurificación del río. Los residentes de las márgenes del cauce del río deben soportar tanto riesgos de salud graves como efectos estéticos derivados de la contaminación del agua. En algunas partes, el olor y la mala calidad estética del río son considerables.

33. **Uso de la tierra.** El uso de la tierra en la orilla izquierda de la cuenca media del río Bogotá (básicamente Bogotá Distrito Capital) es predominantemente urbano e incluye desarrollos residenciales, comerciales e industriales, zonas de recreo y algunos asentamientos ilegales en la zona ribereña. La orilla derecha es predominantemente rural e incluye el distrito de riego La Ramada y otros usos agrícolas de la tierra. Si bien el río Bogotá en sí no fluye a través del centro de Bogotá, muchos de los afluentes que desembocan en él están muy contaminados como resultado de las descargas provenientes de las zonas urbanas densamente pobladas. La composición de las industrias es muy variada e incluye diferentes tipos de actividades y procesos industriales. La agricultura también varía considerablemente y comprende desde el pastoreo extensivo y la cría de ganado hasta la producción intensiva y comercial de flores. En muchas partes de las zonas más alejadas, están desarrollándose rápidamente nuevas urbanizaciones destinadas a toda clase de habitantes residenciales.

34. **Hábitats naturales clave y diversidad biológica.** La zona de influencia del proyecto cubre una zona geográfica amplia que incluye diversos humedales potencialmente delicados de importancia en términos de biodiversidad local y regional. Si bien la zona en su conjunto ha estado sujeta a varias amenazas e impactos derivados de una amplia gama de presiones que impone el desarrollo urbano, quedan algunas zonas de gran interés biológico. Desde luego que los humedales restantes, los cuales revisten gran importancia, son de especial interés. Estas zonas no se verán perjudicadas por las actividades del proyecto, pero serán

objeto de intervenciones con el fin de mejorar su calidad general, su protección y su gestión a largo plazo.

#### **D. Riesgos ambientales y sociales previstos asociados con el componente 1 (Ampliación y mejoramiento de la PTAR Salitre)**

35. **Componente 1: Fase de construcción.** Los efectos y riesgos ambientales y sociales asociados con este componente serán diferentes durante la fase de construcción y la fase operativa del proyecto. Durante la construcción, los impactos ambientales principales se relacionan con el impacto temporal de la construcción asociado a las obras civiles de gran escala de la ampliación de la PTAR Salitre. Los posibles impactos y riesgos incluyen la alteración temporal del tránsito local; la pérdida temporal de acceso a zonas de recreo, residenciales y comerciales; el control de los ruidos y el polvo; el manejo y la gestión de materiales de construcción peligrosos; la planificación de la respuesta ante situaciones de emergencia ocupacional; el control de la erosión y los sedimentos; la eliminación de los residuos de construcción, y hallazgos arqueológicos fortuitos. Los impactos durante la construcción derivan de actividades como la excavación para la ampliación de la planta; el transporte de arena, hormigón y materiales de construcción; la compactación de tierra; el vertido de hormigón, y el funcionamiento de equipos de construcción pesados.

36. Con medidas de mitigación y supervisión adecuadas, la mayoría de los impactos se consideran manejables y el impacto será moderado y temporal. Todos los controles de la gestión de la construcción quedarán en manos de los contratistas y las medidas ambientales específicas se detallarán en el contrato de construcción. A continuación se analizan algunos de los impactos específicos de la PTAR Salitre, en función de la EA de la CAR<sup>26</sup>.

37. **Calidad del aire y olores.** Durante la fase de construcción, la calidad del aire local puede verse afectada por un incremento en la concentración de partículas en suspensión y monóxido de carbono como consecuencia de los movimientos de tierra y el funcionamiento de las maquinarias. Pueden preverse olores molestos provenientes de la extracción y los movimientos de tierra y la eliminación de materiales de rellenos sanitarios como resultado de excavaciones directas. Otra acción que puede generar olores es el almacenamiento temporal y la eliminación de los desechos de la construcción. Estos impactos se caracterizan generalmente por ser negativos, pero con un bajo riesgo ambiental a largo plazo. Se prevé que sean de mediana o baja intensidad, de duración breve y muy localizados. Si bien el impacto se manifiesta de manera inmediata y puede tener un efecto directo, solo se prolonga durante el tiempo que dura la operación que lo produce. No se prevé que estos impactos sean significativos y se abordarán a través de los planes de gestión específicos del emplazamiento elaborados por el contratista.

38. **Ruido.** Se prevé un aumento de los niveles de ruido en las áreas en construcción como resultado del movimiento y funcionamiento de camiones y equipos mecánicos pesados. Las principales fuentes de ruido y vibraciones incluyen: i) el funcionamiento de equipos pesados y herramientas manuales; ii) el movimiento de personal y vehículos de menor potencia, y iii) equipos y maquinarias móviles, como generadores eléctricos. Es probable que el impacto del ruido sea negativo, pero tendrá un efecto de mediano a

---

<sup>26</sup> La metodología utilizada para evaluar los riesgos, impactos y beneficios fue sistemática y cumplió con las buenas prácticas reconocidas. La evaluación del alcance y de los riesgos incluyó el uso de una matriz de Leopold detallada, listas de control, exámenes de expertos evaluadores independientes, consultas públicas y opinión especializada.

moderado debido a su intensidad de mediana a baja y al hecho de que será de corta duración, localizado y de frecuencia intermitente durante el tiempo que continúen las obras que lo generan. El plan de gestión específico del emplazamiento elaborado por el contratista incluirá medidas para abordar estos efectos.

39. ***Calidad del suelo y estabilidad.*** La calidad del suelo puede verse afectada por la lixiviación, el vertido y el traslado de materiales sólidos o líquidos que están en uso temporalmente o que se transportan al sitio de eliminación definitiva. En estos casos, los posibles impactos sobre la calidad del suelo podrían ser de una intensidad mediana o alta, según el tipo de material involucrado y el contexto local. En general, los efectos directos tendrán una duración temporal y se incluirán controles estrictos sobre el vertido como parte de los planes de gestión específicos del emplazamiento elaborados por los contratistas.

40. La compactación o el asentamiento de suelos alrededor de los emplazamientos de construcción pueden derivar de una diversidad de actividades de construcción del proyecto. Estas comprenden la excavación; el movimiento de maquinarias pesadas; la eliminación temporal de grandes volúmenes de materiales, residuos y escombros; instalaciones de gran escala y pesadas, y la demolición. Los impactos que pueden producirse en estos casos serán negativos, de una intensidad mediana a alta, pero de alcance local. Se prevé que los efectos negativos directos, si los hubiere, sean de carácter temporal. Si bien tales impactos son muy poco probables si las obras se diseñan y ejecutan adecuadamente, deben tenerse en cuenta todas las medidas necesarias para evitar estos riesgos. Los planes de gestión específicos del emplazamiento elaborados por el contratista incluirán referencias específicas a medidas para situaciones de emergencia en el caso de accidentes imprevistos en la construcción.

41. Una preocupación específica en la PTAR Salitre se relaciona con su uso previo como vertedero, lo que podría generar un riesgo potencial para la estabilidad de la construcción e incrementar la lixiviación de contaminantes en el emplazamiento. A fin de evaluar este riesgo y facilitar los esfuerzos de mitigación apropiados durante el diseño, la construcción y la ejecución, la CAR contratará una empresa de consultoría en ingeniería para llevar a cabo un estudio geotécnico en otoño de este año para evaluar las condiciones del emplazamiento. Los resultados del estudio se considerarán en el diseño de ingeniería de la planta y en el plan de gestión ambiental del proyecto.

42. ***Calidad del agua superficial.*** Las actividades de construcción que pueden afectar la calidad de los recursos hídricos durante la fase de construcción incluyen: i) el traslado de sólidos o líquidos durante la limpieza de los emplazamientos de las obras; ii) la lixiviación, el vertido y el transporte de sólidos que han estado en uso temporalmente o que se transportan al sitio de eliminación definitiva, y iii) los sedimentos producto del movimiento de tierra que pueden alcanzar el agua superficial. Los impactos negativos que estas actividades pueden generar serán directos, de una intensidad baja a mediana, de corta duración, de alcance local, y ocasionales. En este sentido, no se identificaron impactos negativos a largo plazo, teniendo en cuenta las condiciones de referencia actuales de las masas de agua en la zona del proyecto. El plan de gestión específico del emplazamiento elaborado por el contratista incluirá medidas para abordar estos efectos.

43. ***Impactos sobre la flora y la fauna.*** No se prevén como consecuencia de la construcción impactos significativos sobre la flora o la fauna durante las fases de construcción de la ampliación de la PTAR Salitre. Las obras de construcción del proyecto no afectarán directamente hábitats naturales terrestres delicados o esenciales conocidos en la zona de influencia del proyecto. Todas las obras del proyecto están ubicadas en la tierra

propiedad de Salitre, la cual está cubierta parcialmente con vegetación, pero es un antiguo vertedero. Los humedales delicados están ubicados dentro de la zona de influencia de la planta, pero no se verán afectados significativamente por las obras del proyecto. La cubierta vegetal, algunos árboles y pequeños arbustos pueden verse afectados por el establecimiento de las zonas de almacenamiento temporal y de almacenamiento de materiales; la eliminación temporal de tierra y residuos de construcción, y el movimiento de vehículos y maquinarias pesadas. Estos impactos se consideran temporales y no significativos.

44. Según la EA —y como lo confirmaron las visitas sobre el terreno por parte del equipo del Banco—, la zona de ampliación para la planta Salitre se encuentra algo degradada y ha sufrido un severo impacto por el hecho de que alguna vez fue un vertedero para la ciudad de Bogotá. La planta Salitre está muy cerca de zonas de recreo, barrios residenciales y un parque regional amplio. Es probable que los accidentes en el emplazamiento de construcción produzcan algunos impactos inesperados en las zonas con vegetación o en los parques urbanos. El mayor volumen de camiones y equipos de construcción puede afectar estas zonas residenciales y de recreo, y deberá prestarse especial atención a fin de proteger estos lugares. Se deberá tener especial cuidado para evitar verter contaminantes del emplazamiento de construcción que puedan ser perjudiciales para la vegetación. Los impactos derivados de tales accidentes, aunque negativos, probablemente serían localizados debido a que ningún emplazamiento de construcción se encuentra cerca de zonas con vegetación de importancia.

45. **Salud ocupacional y seguridad pública.** Debido a la magnitud y el alcance de las obras civiles, durante las obras del proyecto se empleará una gran cantidad de trabajadores calificados y no calificados. Se aplicarán medidas estrictas de salud y seguridad ocupacional para evitar accidentes que afecten a los trabajadores y a las personas que vivan en las zonas de construcción del proyecto. El movimiento de equipos pesados puede representar cierto riesgo para los residentes locales, y todos los planes de gestión del emplazamiento elaborados por los contratistas de la construcción incluirán referencias específicas a cuestiones de seguridad pública.

46. **Componente 1: Fase operativa.** Durante la fase operativa de la PTAR Salitre, los principales impactos y riesgos ambientales se relacionan con i) los posibles riesgos para la salud humana y ambientales asociados con la gestión y eliminación de biosólidos que se generan constantemente en la planta de tratamiento Salitre; ii) molestias localizadas en relación con las operaciones de la planta Salitre, tales como el olor y el ruido, y iii) el riesgo de accidentes que supone la liberación de gas de cloro o la explosión de gas metano en los digestores. A continuación se analizan algunos de los impactos específicos de la PTAR Salitre durante la fase operativa.

47. **Impactos sobre los hábitats naturales clave y la biodiversidad acuática.** Los asentamientos humanos y las actividades agrícolas e industriales afectaron considerablemente la zona de influencia del proyecto. Aun así hay humedales importantes en la zona del proyecto. Como parte de la EA, se realizó una evaluación integral de los impactos incrementales producidos por el proyecto sobre hábitats naturales críticos y sobre la biodiversidad acuática del río Bogotá. Se prevé que los impactos sobre la flora y la fauna sean, en general, positivos como resultado de las inversiones directas en la recuperación de los humedales.

48. **Impactos molestos asociados con las operaciones de la planta de tratamiento.** La operación de la planta de tratamiento preliminar Salitre puede ocasionar problemas en

cuanto a olores y ruidos. Son especialmente importantes los posibles impactos y riesgos para los residentes de Suba, zona urbana densamente poblada al lado de la planta Salitre. Bajo ciertas condiciones climáticas, los olores pueden tornarse bastante intensos ya que la planta está ubicada en una zona muy cercana a barrios residenciales. Durante la fase de diseño de ingeniería detallado respecto de la ampliación de la planta, se considerarán diversas opciones para solucionar los problemas del ruido y el olor, tales como el uso de tecnologías adecuadas para la captación y el tratamiento de gases que generan olor y el aislamiento de equipos que hacen ruido.

49. ***Impactos asociados con la eliminación de biosólidos generados en las plantas de tratamiento.*** Se calcula que el total de biosólidos generados por la PTAR Salitre ampliada es de unas 102 toneladas/día en función del peso seco (25% de sólidos totales). Esta cantidad considerable de biosólidos requerirá de un plan de gestión de biosólidos ideado con cuidado, a fin de guiar las operaciones generales. Por el momento, los biosólidos se transportan al vertedero El Corzo, destinado específicamente para la eliminación de desperdicios de la construcción, pero los biosólidos se utilizan como material de cobertura final. El sistema de eliminación existente no es suficiente para manejar la producción futura de biosólidos; por lo tanto, la EAAB y la CAR están realizando estudios para proporcionar una solución a corto plazo. Entre las opciones que se están considerando se incluyen: i) el transporte de biosólidos al vertedero de la ciudad (Doña Juana), donde se los utilizaría como material de cobertura final, y ii) la construcción de un monovertedero.

50. Claramente, el manejo y transporte de cantidades tan grandes de biosólidos presenta posibles riesgos ambientales y, posiblemente, para la adquisición de tierras para la construcción de sitios de eliminación. El proyecto deberá tomar precauciones adecuadas para manejar los biosólidos de Salitre de acuerdo con normas técnicas aceptables y como se define en la EA. Además de los estudios llevados a cabo por la CAR y la EAAB respecto de la solución a corto plazo para la gestión de biosólidos, durante la ejecución del proyecto, y como parte de la asistencia técnica obtenida a través de un préstamo, se elaborará un plan maestro de biosólidos para desarrollar un plan de gestión de biosólidos sostenible a largo plazo para la ciudad de Bogotá que tenga en cuenta opciones de eliminación y reutilización beneficiosa, el marco normativo, y las tecnologías disponibles y apropiadas.

51. ***Beneficios ambientales del componente.*** La consideración de los posibles riesgos operativos adversos debe equilibrarse con la consideración de los posibles beneficios ambientales y para la salud humana de gran importancia que derivan del proyecto, entre los que se incluyen i) la reducción de las exposiciones a los altos niveles de contaminantes existentes en el río Bogotá; ii) mejores condiciones ambientales en la zona ribereña de dicho río, incluida la interrelación con las zonas de conservación de los humedales; iii) la reducción de los riesgos de inundación de las propiedades y comunidades que viven a lo largo del río Bogotá, y iv) la creación de parques en los humedales y las zonas de recreo para varios propósitos. Además de los beneficios del proyecto para la salud, se prevén importantes beneficios relativos a la calidad de vida que se producirán a largo plazo, incluidas mejoras en el valor recreativo de la cuenca y en la habitabilidad en las zonas de impacto.

52. Este proyecto permitirá una reducción de la contaminación del agua en el tramo medio y, como consecuencia, una mejora en la calidad del agua para riego y en la ecología del río. La ampliación de la PTAR Salitre y los interceptores contribuirán a una reducción considerable de la contaminación por elementos patógenos y orgánicos en el río, lo que reducirá los riesgos para la salud pública en Bogotá y ayudará a recuperar los ecosistemas del río. Se realizaron proyecciones de la DBO<sub>5</sub>, los SST y las concentraciones de coliformes

totales en el río para prever las concentraciones durante el período de caudal promedio luego de la ejecución del proyecto. Los resultados de los modelos presentados en el volumen I de la EA indican que, con el proyecto, puede obtenerse la clase IV. La simulación de la DBO<sub>5</sub> indica que puede preverse una DBO<sub>5</sub> de 50 miligramos/litro en las partes medias de la cuenca.

#### **E. Impactos asociados con el componente 2 (Obras para el control de las inundaciones y para el río)**

53. **Componente 2: Fase de construcción.** Los principales impactos asociados con el componente 2 se relacionan con las actividades de dragado del río y construcción de un terraplén en la fase de construcción. La construcción de las obras de protección contra inundaciones requerirá grandes volúmenes de movimiento de tierra, principalmente como resultado de la mejora del sistema de diques existente a partir de la construcción de un nuevo terraplén en la ribera izquierda o derecha con una berma de 30 metros. Las obras incluirán excavaciones de canales, movimientos de tierra y construcción de diques. La mayoría de los impactos asociados con estas obras civiles serán de carácter temporal y son similares a los que se producen en cualquier emplazamiento de construcción grande, tales como el control del polvo y ruidos molestos, el transporte y la eliminación de material excavado, el acceso a los emplazamientos de construcción, zonas ocupadas por las obras, entre otros. A continuación se indican dos impactos negativos específicos de este componente.

54. **Hallazgos arqueológicos fortuitos.** Dado el amplio historial de actividad humana a lo largo del río, hay una gran probabilidad de encontrar piezas arqueológicas de mucho valor durante la ejecución del componente. Los procedimientos para identificar y responder al hallazgo de posibles piezas arqueológicas se incluirán en los contratos de construcción y se ejercerá una supervisión estricta como lo indica el PGA.

55. **Control de plagas.** La excavación en gran escala y los movimientos de tierra a lo largo del río y dentro de este podría ocasionar una mayor exposición a alimañas y otros vectores de enfermedades en toda la zona del proyecto. Como parte del PGA se ha desarrollado una estrategia de control de plagas como guía durante la ejecución de este componente. El plan estará en total consonancia con los requisitos del Banco con respecto a la adquisición, el almacenamiento, el manejo y la aplicación de plaguicidas y venenos para roedores.

56. **Reasentamiento y adquisición de tierras.** La adquisición de tierras y el reasentamiento son requisitos en el marco del presente proyecto. En la sección V del presente resumen, se analiza el plan de gestión social que la CAR está elaborando.

57. **Componente 2: Fase operativa.** En la EA se identificaron los siguientes impactos y riesgos relacionados con la fase operativa: i) la posible ruptura de un dique y, en consecuencia, daños materiales y la posible pérdida de vidas; ii) los riesgos para la salud pública que suponen las actividades recreativas en el río (pesca y natación) y el uso de productos químicos para el control de la infestación por roedores en los diques, y iii) la reducción del riesgo de inundaciones y las mejoras en el medio ambiente pueden suscitar desarrollos urbanos no deseados, particularmente la ocupación ilegal, en zonas rurales. En el volumen III de la EA, se abordaron las iniciativas de mitigación.

58. **Beneficios ambientales del componente.** El principal beneficio para la población es el incremento del parámetro de protección contra inundaciones a un período de retorno de 100 años a lo largo de los 68 kilómetros del río y la reducción del riesgo de inundación de los afluentes en la ciudad de Bogotá debido a los niveles más bajos de las aguas del río Bogotá. Los beneficios ecológicos importantes incluyen la recuperación del hábitat ribereño en las márgenes del río, así como los meandros y humedales, que fomentará mejoras en el medio ambiente para las aves y los animales, y posiblemente mejorará la calidad del agua. Asimismo, las mejoras en los paisajes y las zonas de recreo contribuirán a la estética ambiental y crearán espacios públicos para disfrutar del río en la zona urbana.

## **F. Consulta a partes interesadas y divulgación de información**

59. Durante el desarrollo de la EA, se pidió a una amplia variedad de partes interesadas que indicaran sus preocupaciones y se garantizó un proceso abierto al debate y la discusión sobre los objetivos y las metas del proyecto. Como parte de la elaboración del proyecto, se realizaron extensas consultas a las partes interesadas utilizando metodologías tanto formales como informales. La información del proyecto se puso a disposición del público a través de una serie de eventos y talleres de divulgación pública. Hubo debates informales con grupos de discusión en los que participaron ONG, el Gobierno local, las personas afectadas y los beneficiarios en distintos momentos durante las fases de preparación y evaluación.

60. La CAR patrocinó una consulta pública en Bogotá en marzo de 2009 para presentar y analizar el alcance detallado de la labor y los términos de referencia desarrollados para las EA propuestas para el proyecto. Este taller formal se realizó sobre la base del diálogo informal y el debate entre diversos asociados y partes interesadas, incluidos la CAR, el Banco, los especialistas técnicos y el Gobierno local. Este taller de evaluación del alcance contó con alrededor de 60 participantes que representaban una amplia variedad de partes interesadas de los sectores público y privado, incluidos el MAVDT, Gobiernos municipales, ONG ambientales nacionales y locales, organismos gubernamentales nacionales, organizaciones comunitarias y asociaciones profesionales. Los participantes del taller analizaron en profundidad los términos de referencia y el alcance de la labor propuesto para las EA<sup>27</sup>.

61. Durante el taller, los participantes formularon muchas preguntas, que la CAR respondió brevemente. Se realizaron preguntas importantes en relación con las alternativas del proyecto, específicamente el nivel propuesto de tratamiento de aguas residuales, y la estrategia general de la calidad del agua para la cuenca, incluidas las inquietudes respecto de la relación entre el proyecto propuesto y otros proyectos de importancia regional y sobre si el alcance del proyecto era suficiente para lograr las metas de calidad de agua a largo plazo a nivel regional.

62. El 21 de agosto de 2009, se publicaron los tres volúmenes de la EA en el sitio web de la CAR y se realizó un segundo taller de consulta pública el 16 de septiembre de 2009 para presentar los documentos preliminares de la EA y solicitar a las partes interesadas que aporten comentarios sobre las conclusiones, cuestiones y recomendaciones del informe. Durante el taller, se plantearon varias cuestiones en relación con la visión estratégica para la cuenca, la gestión de los humedales, la gestión de biosólidos, los resultados de los modelos sobre la calidad del agua, el control de plagas, el alcance técnico de los procedimientos

---

<sup>27</sup> Los términos de referencia de la EA están incluidos en el sitio web de la CAR: [http://www.car.gov.co/documentos/2\\_27\\_2009\\_4\\_56\\_59\\_PM\\_Evaluacion%20Ambiental%20Preliminar.pdf](http://www.car.gov.co/documentos/2_27_2009_4_56_59_PM_Evaluacion%20Ambiental%20Preliminar.pdf).

internos de revisión y aprobación del proyecto, y la importancia de la comunicación continua con las partes interesadas.

63. Se llevaron a cabo otras consultas informales y campañas de difusión de información sobre el proyecto como parte de la preparación del estudio de evaluación económica, el PAR. En la encuesta a los hogares, se recopilaban datos de 1000 hogares y se celebró una gran cantidad de reuniones comunitarias con grupos de discusión para reunir información sobre las condiciones socioeconómicas y una serie de cuestiones de diseño del proyecto, incluidas la disposición para pagar y las percepciones y la valoración de los beneficios previstos. Durante este estudio, se compartió información importante del proyecto en relación con el diseño del proyecto, los beneficios previstos y los posibles riesgos compartidos con las poblaciones escogidas como muestra para la encuesta. Este proceso fue un instrumento utilizado para la divulgación y difusión de información, y para la recepción de comentarios de las partes interesadas.

64. Además de las iniciativas de consulta y divulgación específicas del proyecto, la CAR ha establecido mecanismos y equipos de difusión social que servirán de vínculo constante con las comunidades locales y facilitarán la comunicación. En el Plan de Gestión Social para la Adquisición de Tierras y el Reasentamiento (es decir, el PAR), se presenta la estrategia general de difusión para el proyecto, la cual se compone de dos programas principales: i) el Programa de Educación Ambiental y Participación Comunitaria, y ii) el Programa para la Gestión de Cumplimiento y Solución de Problemas, que se ocupa principalmente de los hogares y las parcelas afectados.

65. Además de la divulgación pública general, se solicitaron comentarios sobre la EA a expertos en materia de medio ambiente reconocidos a nivel nacional. Estos expertos de alto nivel han proporcionado exámenes técnicos en los campos de ingeniería ambiental, saneamiento y evaluaciones de impacto ambiental. La EA preliminar del proyecto se publicó primero en el *InfoShop* del Banco, el 28 de agosto de 2009, y se actualizó como corresponde a través del tiempo. Se planificaron otras consultas y talleres de intercambio de información como parte de la estrategia de comunicación del proyecto y se realizarán durante la ejecución del proyecto.

## **G. Plan de Gestión Ambiental**

66. **Elementos clave del PGA.** Como parte del proceso de EA, la CAR y la EAAB han confeccionado un PGA que incluye medidas para evitar, minimizar, mitigar y supervisar posibles impactos del proyecto durante la fase de construcción y la fase operativa del proyecto. Los programas básicos del PGA incluyen: i) la gestión de los impactos durante la fase de construcción; ii) la gestión de los impactos durante la fase operativa, iii) el seguimiento de la zona de influencia del proyecto; iv) la planificación y gestión de situaciones de emergencia; v) la consulta, comunicación y divulgación, y vi) el fortalecimiento de la capacidad, la capacitación y la investigación.

67. **Responsabilidades institucionales generales.** La CAR será responsable de la fidelidad general del proyecto a las medidas ambientales requeridas en virtud de los componentes del proyecto durante la fase de construcción. La CAR asignará personal calificado específico que se ocupará de la gestión y supervisión de todos los aspectos del PGA durante la ejecución del proyecto, y será responsable de garantizar auditorías periódicas y supervisar el desempeño ambiental. Asimismo, la CAR asumirá el liderazgo en la coordinación de la divulgación de la información y las consultas. En el caso específico del

componente 1, la CAR trabajará en estrecha colaboración con la EAAB para garantizar que todos los contratos de construcción incluyan disposiciones de gestión ambiental adecuadas para evitar impactos relacionados con la construcción y que se estén cumpliendo las obligaciones contractuales durante la supervisión, así como las emanadas de la licencia ambiental del proyecto.

68. Todos los contratistas de la construcción deberán cumplir con el PGA específico del emplazamiento, el cual describe diversas medidas que deben respetarse en cada emplazamiento. Cada contratista deberá asignar un ingeniero ambiental u otra persona debidamente calificada para verificar diariamente el cumplimiento de los planes específicos del emplazamiento. Los requisitos específicos para la mitigación ambiental y social se incluirán en los documentos de licitación y como parte de las cláusulas del contrato básico de construcción.

69. En la fase operativa, la EAAB tendrá responsabilidades institucionales específicas para garantizar que se minimicen y se eviten todos los impactos relacionados con la operación. Por intermedio del personal existente en la unidad ambiental y en la planta, la EAAB se asegurará de que en todo momento haya personal básico competente disponible que se ocupe de supervisar la aplicación de las medidas de gestión ambiental bajo su control directo y garantizar el cumplimiento del PGA acordado y de las obligaciones emanadas de las licencias ambientales.

70. **Control.** El programa de control se ejecutará para el seguimiento de indicadores relacionados con el objetivo de desarrollo del proyecto y otros indicadores a mediano y largo plazo establecidos en virtud de los instrumentos de planificación de la CAR a nivel regional. Además, se requerirá el control del cumplimiento de las medidas ambientales específicas para cada componente tanto en la fase de construcción como en la fase operativa y los costos asociados se incorporarán en los contratos pertinentes en los casos que corresponda. La CAR y la EAAB serán los principales responsables de establecer valores de referencia y controlar actividades específicas de la construcción y el funcionamiento de las plantas en el marco del componente 1. Asimismo, en relación con el componente 2, la CAR será responsable de establecer programas para determinar valores de referencia y programas de control. Estos programas de control se respaldarán mutuamente y se prevé un alto grado de coordinación y cooperación entre las autoridades que ejecutan el proyecto y las diversas partes interesadas.

71. **Divulgación de información.** Se prevé un alto grado de interés público en el avance del proyecto y en los resultados de las actividades de seguimiento, especialmente durante las operaciones del proyecto. La CAR y la EAAB trabajarán juntas para garantizar una estrecha colaboración en lo relativo a la divulgación pública de los informes y datos de seguimiento en todo el período de vigencia del proyecto. La CAR establecerá un sitio web público donde estarán disponibles los informes de situación periódicos, los datos de seguimiento y la información. Las partes interesadas también podrán obtener información a través de las unidades ambientales de la CAR y la EAAB.

72. La información se pondrá a disposición del Gobierno local y de las partes interesadas locales a través de una estrategia integral de comunicaciones y difusión, la cual proporcionará actualizaciones periódicas del proyecto y organizará eventos orientados a los medios y otras campañas de información a nivel local. Tanto la CAR como la EAAB establecerán vínculos de comunicaciones con las partes interesadas, incluidos el Gobierno local y las ONG que trabajan en la zona del proyecto.

73. **Mecanismo institucional.** Un grupo ambiental específico formará parte de la UEP para supervisar la ejecución del PGA aprobado por el Banco. De ser necesario, la UEP contará con el apoyo de otros departamentos especializados de la CAR y consultores especializados con contratos a corto plazo. Los consultores a cargo de la supervisión de la construcción y los contratistas a cargo de la construcción del proyecto ejecutarán el PGA, y la EAAB ejecutará la fase operativa del PGA en la PTAR Salitre. Actualmente, la EAAB tiene unidades técnicas y ambientales que se ocupan específicamente de supervisar las operaciones, incluido el cumplimiento del PGA existente en la PTAR Salitre, conforme a la licencia ambiental.

74. Debido a que algunas de estas actividades serán nuevas tanto para la CAR como para la EAAB, el proyecto respaldará actividades específicas para mejorar la capacidad de planificar y ejecutar los aspectos del proyecto relativos al seguimiento y la divulgación de información. El proyecto contemplará una capacitación específica para mejorar la organización, la dotación de personal y otros recursos a fin de ayudar al fortalecimiento de las capacidades básicas en materia de seguimiento, comunicaciones y difusión, así como talleres, seminarios y eventos de información pública. Las actividades, el alcance de la labor, las responsabilidades institucionales y otros detalles del PGA están disponibles en el archivo del proyecto y en los informes de la Evaluación de Impacto Ambiental elaborados por la EAAB y la CAR.

## H. Salvaguardias sociales

75. La construcción de las obras civiles relacionadas con el componente 2 afectará 211 parcelas de tierra, de las cuales 47 son de propiedad de instituciones gubernamentales tales como Bogotá Distrito Capital y la EAAB, y 164 parcelas son consideradas “parcelas privadas”. Mediante los diseños de ingeniería, la CAR hizo un importante esfuerzo tendiente a reducir el desplazamiento involuntario y la cantidad de propiedades afectadas. La CAR ha preparado un PAR integral que cumple con los requisitos de la OP 4.12. El PAR se conoce como “Plan de Gestión Social para la Adquisición de Tierras y el Reasentamiento”<sup>28</sup>.

76. Las obras del río se dividen en cuatro tramos (A, B, C y D) a lo largo de Bogotá Distrito Capital y de cuatro municipios: Soacha, Mosquera, Cota y Funza. En el siguiente cuadro se incluye la cantidad de parcelas afectadas, por segmento. Estas cifras pueden modificarse a medida que el proyecto avance y se optimice la alineación de los diques.

| <b>Cantidad de parcelas afectadas</b> |                          |                              |              |
|---------------------------------------|--------------------------|------------------------------|--------------|
|                                       | <b>Parcelas privadas</b> | <b>Parcelas del Gobierno</b> | <b>TOTAL</b> |
| TRAMO A                               | 39                       | 4                            | 43           |
| TRAMO B                               | 18                       | 12                           | 30           |
| TRAMO C                               | 74                       | 28                           | 102          |
| TRAMO D                               | 33                       | 3                            | 36           |
| TOTALES                               | 164                      | 47                           | 211          |

77. Casi todas las parcelas privadas se encuentran en zonas rurales y generalmente pertenecen a haciendas medianas y grandes, las cuales se verán afectadas solo parcialmente. Muchas de estas parcelas tienen restricciones que limitan el uso de la tierra. Estas haciendas

<sup>28</sup> El nombre completo en español es “Plan de Gestión Social para la Compra de Áreas y Derechos Adquiridos sobre los Terrenos que Requiere el Proyecto de Adecuación”.

generalmente pertenecen a familias de ingreso alto que no viven en las propiedades afectadas. Sin embargo, en el tramo C, hay dos parcelas en donde se ubica una urbanización ilegal denominada “El Porvenir”, en el municipio de Mosquera. En estas dos parcelas, hay 188 familias (unidades sociales) identificadas en El Porvenir. Además hay 45 unidades económicas y 25 familias que se dedican a reciclar residuos sólidos. Las unidades sociales y económicas de El Porvenir no tienen un título de propiedad válido.

78. En función de las características antes mencionadas, las zonas afectadas se agruparon en tres categorías diferentes: i) las parcelas del Gobierno, ii) las parcelas privadas en zonas rurales y iii) la urbanización ilegal en El Porvenir que implica el desplazamiento involuntario. Cada categoría requiere una estrategia diferente y marcos legales para los derechos de uso de las propiedades y la adquisición de tierras, e implica distintos impactos socioeconómicos, como se describe a continuación.

79. **Parcelas del Gobierno.** La CAR no tiene que adquirir las 47 parcelas de propiedad de las instituciones del Gobierno. Solo se requieren acuerdos institucionales entre la CAR y otras instituciones. El uso de esta tierra no implica ningún desplazamiento físico.

80. **Parcelas privadas.** Las parcelas privadas parcialmente afectadas están ubicadas en zonas rurales (excepto las dos parcelas en El Porvenir) y se utilizan principalmente para ganadería, con una superficie total de alrededor de 541 hectáreas. La CAR distingue tres tipos de zonas:

- i. Zona ribereña: estas son zonas ubicadas dentro de la zona ribereña legalmente definida a lo largo del río, generalmente a 30 metros del punto alto del río. La ley nacional que establece la zona ribereña se sancionó en 1974 y especifica que la zona ribereña pertenece al Estado. Aproximadamente el 33% de la zona de las parcelas privadas se encuentra ubicada en la zona ribereña.
- ii. Zona de protección y gestión ambientales: esta es la zona donde hay restricciones que limitan el uso de la tierra por razones ambientales y cada municipio la estableció durante la última década. La zona es adyacente a la zona ribereña y se extiende, por lo general, hasta una distancia de 31 a 300 metros del río, según las reglamentaciones municipales específicas. Aproximadamente el 66% de la zona de parcelas privadas se encuentra ubicada en la zona de protección y gestión ambientales.
- iii. Zonas sin restricciones fuera de la zona de protección ambiental: solo el 1% de la zona de parcelas privadas se encuentra ubicada en la zona sin restricciones.

No hay desplazamiento físico en las parcelas privadas. Según la investigación jurídica de la CAR, todas las parcelas privadas han adquirido derechos legales que les dan derecho a recibir el valor de mercado de las parcelas y el valor de sustitución de los activos. Además, debido al nivel más alto de protección contra inundaciones y a las mejoras del río, en general, habrá un efecto positivo para la mayoría de los propietarios.

81. ***Urbanización ilegal y desplazamiento involuntario en El Porvenir.*** Es necesario adquirir la parcela del propietario legal y reasentar los hogares y las unidades económicas que serán afectadas. La CAR ha elaborado una matriz integral de derechos para los hogares y las unidades económicas que se basa en el principio de ayudar a mejorar sus medios de subsistencia y nivel de vida o, al menos, restaurarlos a los niveles previos al proyecto.

82. ***Plan de Gestión Social para la Adquisición de Tierras y el Reasentamiento (PAR).*** Dadas las diferentes características legales y socioeconómicas de las personas y parcelas afectadas, el PAR contiene tres secciones distintas, a fin de reflejar apropiadamente los requisitos y procedimientos para comprar tierras y reasentar a la población desplazada, según se describe a continuación.

83. ***Transferencia de las parcelas del Gobierno.*** En el caso de las 47 parcelas institucionales, se elaborarán y firmarán acuerdos administrativos entre la CAR y las instituciones involucradas, que le permitirán a la CAR utilizar las zonas transferidas. La CAR ha confirmado que las zonas transferidas no están ocupadas actualmente y colaborará con las autoridades para garantizar que no haya invasiones ilegales.

84. ***Derechos de uso de las propiedades y adquisición de parcelas privadas.*** Se realizó un censo y un estudio de los títulos de propiedad legales que abarcaron las 164 parcelas y se preparó un estudio socioeconómico detallado para los tramos A y B. En función de los resultados, se preparó el Plan de Gestión Social para la Adquisición de Tierras y el Reasentamiento. Este plan incluye los siguientes programas: i) información y comunicación, y ii) la adquisición de tierras, que describe todo el proceso de acuerdo con la legislación nacional. Como se indicó anteriormente, todas las parcelas privadas han adquirido derechos legales que les dan derecho a recibir el valor de mercado de las parcelas y el valor de sustitución de los activos. El valor de las tierras y los activos se basa en las evaluaciones realizadas por el Instituto Geográfico Agustín Codazzi (IGAC). En los casos en que la adquisición de tierras represente más del 70% de la parcela (solo 14 de las 164 parcelas), el propietario podrá solicitar la compra de toda la propiedad. La mayor parte de las parcelas pertenece a haciendas grandes compuestas por varias parcelas y, por ello, el impacto económico real, en la mayoría de los casos, es relativamente reducido.

85. ***Plan de reasentamiento para El Porvenir.*** Se llevó a cabo un censo detallado de las personas y empresas afectadas, que mostró que hay 188 unidades sociales afectadas con el desglose que se presenta a continuación: 91 residentes “propietarios”, 32 no residentes “propietarios” y 65 arrendatarios. Además hay 45 empresas pequeñas y 25 familias que se dedican a reciclar residuos sólidos. El plan de reasentamiento incluye los siguientes programas: i) información y comunicación; ii) adquisición de estructuras afectadas; iii) indemnización adicional por la vivienda, las pérdidas de ingresos y los gastos de traslado; iv) restitución de la vivienda, ya sea a través de la adquisición de una vivienda legal en el mercado o a través de una nueva solución de viviendas cooperativas provista por el municipio de Mosquera en asociación con la CAR (ambas medidas implican otorgar los subsidios necesarios a la familias a fin de que puedan acceder a una vivienda legal); v) ingreso de restauración y condiciones socioeconómicas (actividades económicas, ingreso, acceso a los servicios de salud y educación y trama social).

86. ***Capacidad institucional.*** El proyecto será la primera experiencia a gran escala de la CAR en la ejecución de planes de adquisición de tierras y de reasentamiento. La CAR ha conformado un grupo interdisciplinario de profesionales dentro de la UEP, que incluye abogados, especialistas en materia social y especialistas en valoración de tierras y activos.

Este equipo también cuenta con el apoyo de otros departamentos y profesionales dentro de la CAR. En el equipo de la CAR, hay miembros con experiencia en reasentamiento adquirida en proyectos financiados por el Banco. El equipo del Banco, además de brindar asistencia según sea necesario, controlará de cerca el proceso de adquisición de tierras y reasentamiento durante la etapa de ejecución.

87. **Consultas y divulgación.** La CAR mantuvo largas conversaciones con los propietarios de las tierras y la comunidad de El Porvenir en relación con las políticas y los procedimientos de adquisición de tierras y reasentamiento. La comunidad de El Porvenir está bien informada respecto de la reubicación inminente y existe un firme apoyo al proceso, ya que se prevé que el nivel de vida de las personas afectadas mejore considerablemente. Se llevaron a cabo numerosas consultas a los propietarios de las tierras de los tramos A, B, C y D y existe una disposición general a vender de manera voluntaria (en vez de expropiar) pequeñas porciones de tierra a la CAR al preverse beneficios significativos derivados del proyecto. Muchos propietarios respaldan con gran entusiasmo el proyecto y han expresado su disposición para agilizar el proceso de adquisición de tierras.

88. El PAR preliminar se publicó primero en el *Infoshop* del Banco Mundial, el 17 de diciembre de 2009, y en el sitio web de la CAR, el 9 de marzo de 2010. La versión final aprobada del PAR se publicó tanto en el *Infoshop* como en el sitio web de la CAR en mayo de 2010.

## I. Resumen del cumplimiento de las políticas de salvaguardia del Banco Mundial

89. El proyecto propuesto se encuentra en la categoría de riesgo ambiental “A”, según los posibles impactos de las inversiones a gran escala en saneamiento, control de inundaciones y mejora del río en el marco de los componentes 1 y 2. En el cuadro 10.1, se indica cuáles de las políticas del Banco Mundial se prevé poner en práctica en el marco de la operación propuesta. A continuación se describen los fundamentos y las obras completadas para cumplir con estas políticas.

**Cuadro 10.1: Políticas de salvaguardia que deben aplicarse al proyecto**

| <b>Políticas de salvaguardia que deben aplicarse:</b>                | <b>Sí</b> | <b>No</b> |
|----------------------------------------------------------------------|-----------|-----------|
| Evaluación Ambiental (OP/BP/GP 4.01)                                 | [x]       | [ ]       |
| Hábitats Naturales (OP/BP 4.04)                                      | [x]       | [ ]       |
| Control de Plagas (OP 4.09)                                          | [x]       | [ ]       |
| Propiedad Cultural (OPN 11.03, modificada como OP 4.11)              | [x]       | [ ]       |
| Reasentamiento Involuntario (OP/BP 4.12)                             | [x]       | [ ]       |
| Pueblos Indígenas (OP 4.10)                                          | [ ]       | [x]       |
| Bosques (OP/BP 4.36)                                                 | [ ]       | [x]       |
| Seguridad de las Presas (OP/BP 4.37)                                 | [ ]       | [x]       |
| Proyectos en Zonas en Disputas (OP/BP/GP 7.60)                       | [ ]       | [x]       |
| Proyectos relativos a Cursos de Agua Internacionales (OP/BP/GP 7.50) | [ ]       | [x]       |

90. **Evaluación Ambiental (OP/BP/GP 4.01).** Como se describió antes en detalle, para el proyecto se elaboró una EA integral de tres volúmenes, la cual cumple con los requisitos del Banco.

91. **Hábitats Naturales (OP/BP 4.04).** Dentro de la zona de influencia del proyecto, no hay reservas ecológicas terrestres conocidas ni reservas acuáticas existentes. Debido a que el objetivo del proyecto es contribuir a la mejora considerable de las condiciones de la calidad del agua en la cuenca del río Bogotá, se prevé que tendrá importantes impactos positivos para los hábitats naturales ribereños ubicados en la zona del proyecto. El proyecto tiene metas específicas para mejorar la calidad y el estado de los humedales, los cuales, se sabe, poseen valor ecológico como hábitat y por su paisaje, además del potencial recreativo y turístico.

92. **Control de Plagas (OP 4.09).** Como parte del control de las inundaciones y de las obras en el río, es posible que los movimientos de tierra a gran escala produzcan una mayor exposición a los riesgos para la salud derivados de las alimañas y otros vectores de enfermedades. Como parte del PGA, el proyecto ha desarrollado una estrategia de control de plagas que orientará las operaciones de construcción.

93. **Recursos Culturales Físicos (OP 4.11).** Las evaluaciones preliminares del emplazamiento para la construcción de las obras civiles propuestas no muestran evidencia de la existencia de propiedad cultural que requiera medidas de mitigación o gestión. Sin embargo, debido a que muchas de las obras propuestas son subterráneas o requieren algún tipo de excavación, todos los contratos de construcción incluirán una cláusula en relación con “hallazgos fortuitos” que exigirá a los contratistas detener la construcción si durante la ejecución se encuentra algún sitio subterráneo de propiedad cultural. Antes de que la construcción pueda reanudarse, se elaborarán planes de gestión específicos al emplazamiento para cualquier propiedad cultural que haya sido detectada mediante procedimientos establecidos para los hallazgos fortuitos.

94. **Reasentamiento Involuntario (OP 4.12).** El proyecto requerirá la adquisición de grandes cantidades de tierra para la construcción de las obras de control de inundaciones y de encauzamiento del río. Se elaboró un PAR que incluye una descripción completa de las tierras que se adquirirán, el censo de las propiedades afectadas, los métodos de valoración que se utilizarán, así como el mecanismo de solución de conflictos aplicable durante la ejecución. No será necesario adquirir tierras para la ampliación de la planta Salitre en el marco del componente 1.

95. **Divulgación de información.** Como parte del proceso de elaboración del proyecto, se celebró una serie de eventos orientados a la divulgación pública de información, talleres y reuniones con grupos de discusión para solicitar comentarios sobre la EA y el Plan Social. La EA preliminar se publicó en el sitio web de la CAR y en el *Infoshop* del Banco, en agosto de 2009, y el resumen de la EA se envió al Directorio del Banco Mundial el 9 de septiembre de 2009. El Plan Social para la Adquisición de Tierras y el Reasentamiento preliminar se publicó en el *Infoshop* del Banco antes de la evaluación inicial, en diciembre de 2009, y en el sitio web de la CAR en febrero de 2010. La versión final del PAR aprobado por el Banco se presentó tanto en el *Infoshop* como en el sitio web de la CAR en mayo de 2010.

**Anexo 11: Preparación y supervisión del proyecto**  
**COLOMBIA: Proyecto de Adecuación Hidráulica y Recuperación Ambiental del**  
**Río Bogotá**

|                                                                                                | <b>Planificado</b> | <b>Real</b> |
|------------------------------------------------------------------------------------------------|--------------------|-------------|
| Examen de la nota sobre la idea del proyecto                                                   | 23/03/2009         | 23/03/2009  |
| Documento inicial de información sobre el proyecto para el Centro de Información Pública (CIP) |                    | 17/04/2009  |
| Ficha integrada inicial de datos sobre salvaguardias para el CIP                               |                    | 30/04/2009  |
| Evaluación inicial                                                                             |                    | 01/10/2009  |
| Negociaciones                                                                                  |                    | 30/06/2010  |
| Aprobación del Directorio Ejecutivo/Vicepresidente Regional                                    | 14/12/2010         |             |
| Fecha prevista de entrada en vigor                                                             | 01/03/2011         |             |
| Fecha prevista para el examen de mitad de período                                              | 01/01/2014         |             |
| Fecha prevista de cierre                                                                       | 30/06/2016         |             |

**Personal del Banco y consultores que participaron en el proyecto:**

| <b>Nombre</b>               | <b>Cargo</b>                                         | <b>Unidad</b> |
|-----------------------------|------------------------------------------------------|---------------|
| Greg Browder                | Jefe de equipo del proyecto                          | LCSUW         |
| David Sislen                | Jefe sectorial                                       | LCSSD         |
| Carlos Uribe                | Ingeniero municipal                                  | LCSUW         |
| Carmen Yee                  | Especialista en agua y saneamiento                   | LCSUW         |
| Luz María González          | Analista financiera (consultora)                     | LCSUW         |
| Julian Sandino              | Ingeniero ambiental (consultor)                      | LCSUW         |
| Glenn Morgan                | Especialista principal en medio ambiente (LCSN)      | LCSN          |
| Carlos Vargas               | Analista ambiental (consultor)                       | LCSUW         |
| José Martínez               | Especialista superior en adquisiciones               | LCSPT         |
| Elena Correa                | Especialista superior en cuestiones sociales         | SDV           |
| Carlos Molina               | Especialista en reasentamiento                       | LCSUW         |
| Carlos Ricardo Escudero     | Asesor jurídico superior                             | LEGLA         |
| Pilar González              | Asesora jurídica superior                            | LEGLA         |
| Jeannette Estupiñan         | Especialista en gestión financiera                   | LCSFM         |
| José Janeiro                | Oficial superior de finanzas                         | CTRFC         |
| Patricia Acevedo            | Asistente de programas                               | LCSUW         |
| <b>Expertos evaluadores</b> |                                                      |               |
| Abel Mejía                  | Gerente sectorial                                    | ETWWA         |
| Douglas Olson               | Especialista principal en recursos hídricos          | LCSN          |
| Axel E. Baeumler            | Economista superior especializado en infraestructura | EASIN         |

**Fondos del Banco invertidos en la preparación del proyecto:**

1. Recursos del Banco: US\$660 000; costos fijos de mano de obra: US\$500 000
  2. Fondos fiduciarios: \$35 000
  3. Total: \$700 000
- Costos estimados de aprobación y supervisión: \$150 000

Costos restantes para la entrada en vigor: US\$50 000  
Costo estimado para la supervisión anual: US\$150 000

**Anexo 12: Documentos incluidos en el archivo del proyecto**  
**COLOMBIA: Proyecto de Adecuación Hidráulica y Recuperación Ambiental del**  
**Río Bogotá**

Los siguientes documentos se guardaron en forma electrónica o impresa en el archivo del proyecto:

CAR, *Evaluación ambiental y plan de gestión ambiental: Adecuación hidráulica y recuperación ambiental del río Bogotá*, diciembre de 2009.

CAR, Plan de Gestión Social para la compra de áreas y derechos adquiridos sobre los terrenos que requiere el proyecto de Adecuación Hidráulica y Recuperación Ambiental del río Bogotá, mayo de 2010.

CAR, *Concepto jurídico del Convenio 171*, julio de 2009.

CAR-EAAB, Reglamento Interino del Comité Técnico. Convenio 171 de 2007, febrero de 2009.

CAR, Acuerdo n.º 43: Objetivos de Calidad del Agua para la Cuenca del Río Bogotá a lograr en el año 2020, octubre de 2006.

CAR, Acuerdo n.º 17: Determinación de la zona de ronda de protección del río Bogotá, julio de 2009.

CAR, Acuerdo n.º 25, por el cual se autoriza al Director General de la CAR para suscribir el(los) contrato(s) definitivo(s) de préstamo(s) con la Banca Multilateral, hasta por la suma de US\$250 millones para el financiamiento parcial de la ejecución de las obras, los componentes y en general las inversiones ambientales incorporadas dentro del denominado Megaproyecto Río Bogotá, y asimismo para constituir las garantías y contragarantías que se exijan en el desarrollo del Proyecto, octubre de 2009.

CAR, Acuerdo n.º 30: Declaración de utilidad pública e interés social de los terrenos necesarios para la adecuación hidráulica del río Bogotá dentro del Megaproyecto Río Bogotá, noviembre de 2009.

CAR, Plan de Ordenación y Manejo de la Cuenca Hidrográfica del Río Bogotá, 2006.

CAR, Documento técnico de la adecuación hidráulica y recuperación ambiental del río Bogotá. Bogotá Distrito Capital, 2009.

DNP, CONPES 3320, *Estrategia para el manejo ambiental del río Bogotá*, diciembre de 2004.

DNP, CONPES 3631, *Garantía de la Nación a la CAR para contratar operación de crédito público externo con la Banca Multilateral*, diciembre de 2009.

EAAB-CAR, Estimación preliminar de costos de inversión de la Planta de Tratamiento de Aguas Residuales El Salitre. Fase II, agosto de 2009.

EAAB, Plan de Saneamiento y Manejo de Vertimientos (PSMV), 2008 (versión en evaluación).

Econometría, *Evaluación económica de la adecuación hidráulica y recuperación ambiental de la cuenca media del río Bogotá*, febrero de 2010.

HMV INGENIEROS. Diseño de las obras para la protección contra las inundaciones del río Bogotá en el sector Alicachín-La Conejera. Contrato 1-02-4100-158-2000. Empresa de Acueducto y Alcantarillado de Bogotá, 2003.

IGAC, Resolución 620: Procedimientos para los avalúos ordenados dentro del marco de la Ley 388 de 1997, septiembre de 2008.

MAVDT, Licencia Ambiental Ordinaria para el proyecto “Descontaminación del Río Bogotá”, Resolución n.º 817 del 24 de julio de 1996.

Secretaría de Ambiente, Convenio Interadministrativo 171, entre la CAR, EAAB, y Bogotá Distrito Capital, 2007.

Unión Temporal Saneamiento del Río Bogotá-EAAB, *Definición de la alternativa a seguir para el tratamiento de las aguas residuales de Bogotá*, versión 1, julio de 2003.



**Anexo 13: Estado de préstamos y créditos**

**COLOMBIA: Proyecto de Adecuación Hidráulica y Recuperación Ambiental del  
Río Bogotá**

| Número de identificación del proyecto | Ejercicio | Objetivo                                                                                       | Monto original en millones de US\$ |      |                   |      | Cancelado | No desembolsado | Diferencia entre los desembolsos previstos y reales |                   |
|---------------------------------------|-----------|------------------------------------------------------------------------------------------------|------------------------------------|------|-------------------|------|-----------|-----------------|-----------------------------------------------------|-------------------|
|                                       |           |                                                                                                | BIRF                               | AIF  | Fondos especiales | FMAM |           |                 | Original                                            | Anterior revisado |
| P117590                               | 2011      | CO: Innovación científica y tecnológica                                                        | 25,00                              | 0,00 | 0,00              | 0,00 | 0,00      | 25,00           | 0,00                                                | 0,00              |
| P106628                               | 2010      | CO: Consolidación de la información sobre gestión pública nacional                             | 25,00                              | 0,00 | 0,00              | 0,00 | 0,00      | 19,49           | -2,95                                               | 0,00              |
| P101279                               | 2010      | CO: Proyecto Programa de Gestión de Residuos Sólidos                                           | 20,00                              | 0,00 | 0,00              | 0,00 | 0,00      | 18,00           | 2,00                                                | 0,00              |
| P083904                               | 2010      | CO: Mejoramiento de los servicios de justicia                                                  | 20,00                              | 0,00 | 0,00              | 0,00 | 0,00      | 19,90           | 3,19                                                | 0,00              |
| P113084                               | 2009      | CO: Gestión de riesgos de desastres CAT DDO                                                    | 150,00                             | 0,00 | 0,00              | 0,00 | 0,00      | 150,00          | 0,00                                                | 0,00              |
| P101211                               | 2009      | CO: Segundo Proyecto de Redes de Protección Social                                             | 636,50                             | 0,00 | 0,00              | 0,00 | 0,00      | 27,80           | 27,80                                               | 0,00              |
| P099139                               | 2009      | CO: Consolidación de la información pública, seguimiento y evaluación de la gestión de riesgos | 8,50                               | 0,00 | 0,00              | 0,00 | 0,00      | 5,93            | 0,53                                                | 0,00              |
| P052608                               | 2008      | CO: Proyecto de Educación Secundaria en Antioquia                                              | 20,00                              | 0,00 | 0,00              | 0,00 | 0,00      | 16,10           | 9,10                                                | 0,00              |
| P105164                               | 2008      | CO: (APL) Segundo Proyecto de Respaldo a los Préstamos Estudiantiles                           | 300,00                             | 0,00 | 0,00              | 0,00 | 0,00      | 126,98          | 76,98                                               | 0,00              |
| P104567                               | 2008      | CO: Segundas Asociaciones Productivas Rurales                                                  | 30,00                              | 0,00 | 0,00              | 0,00 | 0,00      | 16,92           | -1,58                                               | 0,00              |
| P082908                               | 2008      | CO: (APL 2) Segundo APL de Educación Rural                                                     | 40,00                              | 0,00 | 0,00              | 0,00 | 0,00      | 35,00           | 16,90                                               | 0,00              |
| P096965                               | 2007      | CO: (APL 1) Abastecimiento de agua y saneamiento en La Guajira                                 | 90,00                              | 0,00 | 0,00              | 0,00 | 0,00      | 90,00           | 75,00                                               | 0,00              |
| P082520                               | 2006      | CO: Proyecto de Inversión en Desarrollo Sostenible                                             | 7,00                               | 0,00 | 0,00              | 0,00 | 0,00      | 0,30            | 0,30                                                | 0,00              |
| P085727                               | 2006      | CO: (APL 2) Reducción de la vulnerabilidad a los desastres naturales                           | 80,00                              | 0,00 | 0,00              | 0,00 | 2,45      | 71,47           | 73,91                                               | 73,91             |
| P082429                               | 2005      | CO: (APL 1) Reducción de la vulnerabilidad a los desastres naturales                           | 260,00                             | 0,00 | 0,00              | 0,00 | 150,00    | 26,32           | 54,97                                               | 16,55             |
| P082167                               | 2005      | CO: Proyecto de Transición Agrícola                                                            | 30,00                              | 0,00 | 0,00              | 0,00 | 0,00      | 0,67            | 0,67                                                | 0,00              |



|         |      |                                              |         |      |      |      |        |        |         |        |
|---------|------|----------------------------------------------|---------|------|------|------|--------|--------|---------|--------|
| P082466 | 2004 | CO: Sistemas integrados de transporte masivo | 757,00  | 0,00 | 0,00 | 0,00 | 0,24   | 54,77  | -451,99 | 0,00   |
| P051306 | 2004 | CO: Primer APL para la paz y el desarrollo   | 37,81   | 0,00 | 0,00 | 0,00 | 0,13   | 6,21   | -1,47   | -1,47  |
| P074726 | 2003 | CO: Proyecto de Servicios Urbanos de Bogotá  | 130,00  | 0,00 | 0,00 | 0,00 | 0,00   | 30,00  | 0,00    | 30,00  |
| Total:  |      |                                              | 2666,81 | 0,00 | 0,00 | 0,00 | 152,82 | 740,86 | -116,64 | 118,99 |

## COLOMBIA

### Estado de cartera activa y desembolsada de IFC (en millones de US\$)

| Ejercicio de<br>aprobación | Empresa          | Monto comprometido |                   |        |         | Monto desembolsado |                   |       |               |
|----------------------------|------------------|--------------------|-------------------|--------|---------|--------------------|-------------------|-------|---------------|
|                            |                  | IFC                |                   |        |         | IFC                |                   |       |               |
|                            |                  | Préstamo           | Capital<br>propio | Cuasi  | Partic. | Préstamo           | Capital<br>propio | Cuasi | Participación |
| 2003                       | AAA              | 18,24              | 0,00              | 0,00   | 0,00    | 18,24              | 0,00              | 0,00  | 0,00          |
| 2002                       | BCSC             | 0,00               | 7,00              | 0,00   | 0,00    | 0,00               | 7,00              | 0,00  | 0,00          |
| 2006                       | BCSC             | 0,00               | 12,78             | 0,00   | 0,00    | 0,00               | 12,78             | 0,00  | 0,00          |
| 2001                       | CHMC             | 23,92              | 10,09             | 0,91   | 0,00    | 4,05               | 5,27              | 0,91  | 0,00          |
| 2004                       | Cartones América | 19,86              | 0,00              | 0,00   | 0,00    | 19,86              | 0,00              | 0,00  | 0,00          |
| 2004                       | Carvajal S.A.    | 35,00              | 0,00              | 35,00  | 0,00    | 15,00              | 0,00              | 26,73 | 0,00          |
| 2006                       | Carvajal S.A.    | 50,00              | 0,00              | 0,00   | 0,00    | 0,00               | 0,00              | 0,00  | 0,00          |
| 2001                       | Cementos Caribe  | 2,02               | 0,00              | 0,00   | 2,59    | 2,02               | 0,00              | 0,00  | 2,59          |
| 2003                       | DAVIVIENDA I     | 19,27              | 10,00             | 0,00   | 0,00    | 19,27              | 8,80              | 0,00  | 0,00          |
| 2006                       | DAVIVIENDA I     | 0,00               | 15,00             | 35,00  | 0,00    | 0,00               | 13,20             | 0,00  | 0,00          |
| 2006                       | Fundación Soc.   | 0,00               | 0,00              | 50,00  | 0,00    | 0,00               | 0,00              | 0,00  | 0,00          |
| 2006                       | Interbolsa       | 14,02              | 0,00              | 0,00   | 0,00    | 0,00               | 0,00              | 0,00  | 0,00          |
| 2002                       | Inversura        | 0,00               | 15,00             | 0,00   | 0,00    | 0,00               | 15,00             | 0,00  | 0,00          |
| 2002                       | Omimex Oil       | 0,00               | 0,00              | 5,00   | 0,00    | 0,00               | 0,00              | 5,00  | 0,00          |
| 2006                       | Petrotesting     | 0,00               | 15,00             | 0,00   | 0,00    | 0,00               | 9,00              | 0,00  | 0,00          |
| 2006                       | Promigas         | 50,00              | 0,00              | 0,00   | 0,00    | 0,00               | 0,00              | 0,00  | 0,00          |
| 2002                       | Protección       | 0,00               | 10,00             | 0,00   | 0,00    | 0,00               | 10,00             | 0,00  | 0,00          |
|                            | SIE              | 0,00               | 0,20              | 0,00   | 0,00    | 0,00               | 0,20              | 0,00  | 0,00          |
| 2002                       | SIG              | 42,00              | 0,00              | 0,00   | 0,00    | 42,00              | 0,00              | 0,00  | 0,00          |
|                            | WWB Cali         | 8,41               | 0,00              | 0,00   | 0,00    | 0,00               | 0,00              | 0,00  | 0,00          |
|                            | WWB Popayán      | 5,61               | 0,00              | 0,00   | 0,00    | 0,00               | 0,00              | 0,00  | 0,00          |
| Total de cartera:          |                  | 288,35             | 95,07             | 125,91 | 2,59    | 120,44             | 81,25             | 32,64 | 2,59          |

| Ejercicio de<br>aprobación          | Empresa          | Aprobaciones pendientes de compromiso |                   |       |               |
|-------------------------------------|------------------|---------------------------------------|-------------------|-------|---------------|
|                                     |                  | Préstamo                              | Capital<br>propio | Cuasi | Participación |
| 2001                                | CHMC             | 0,00                                  | 0,02              | 0,00  | 0,00          |
| 2004                                | Bancafé          | 0,00                                  | 0,02              | 0,00  | 0,00          |
| 2006                                | Interbolsa       | 0,00                                  | 0,01              | 0,00  | 0,00          |
| 2006                                | Petrotesting     | 0,02                                  | 0,00              | 0,00  | 0,00          |
| 2006                                | Promigas Corp.   | 0,00                                  | 0,00              | 0,00  | 0,04          |
| 2006                                | WWB Facility COL | 0,02                                  | 0,00              | 0,00  | 0,00          |
| Total de compromisos<br>pendientes: |                  | 0,04                                  | 0,05              | 0,00  | 0,04          |

## Anexo 14: Reseña del país

### COLOMBIA: Proyecto de Adecuación Hidráulica y Recuperación Ambiental del Río Bogotá

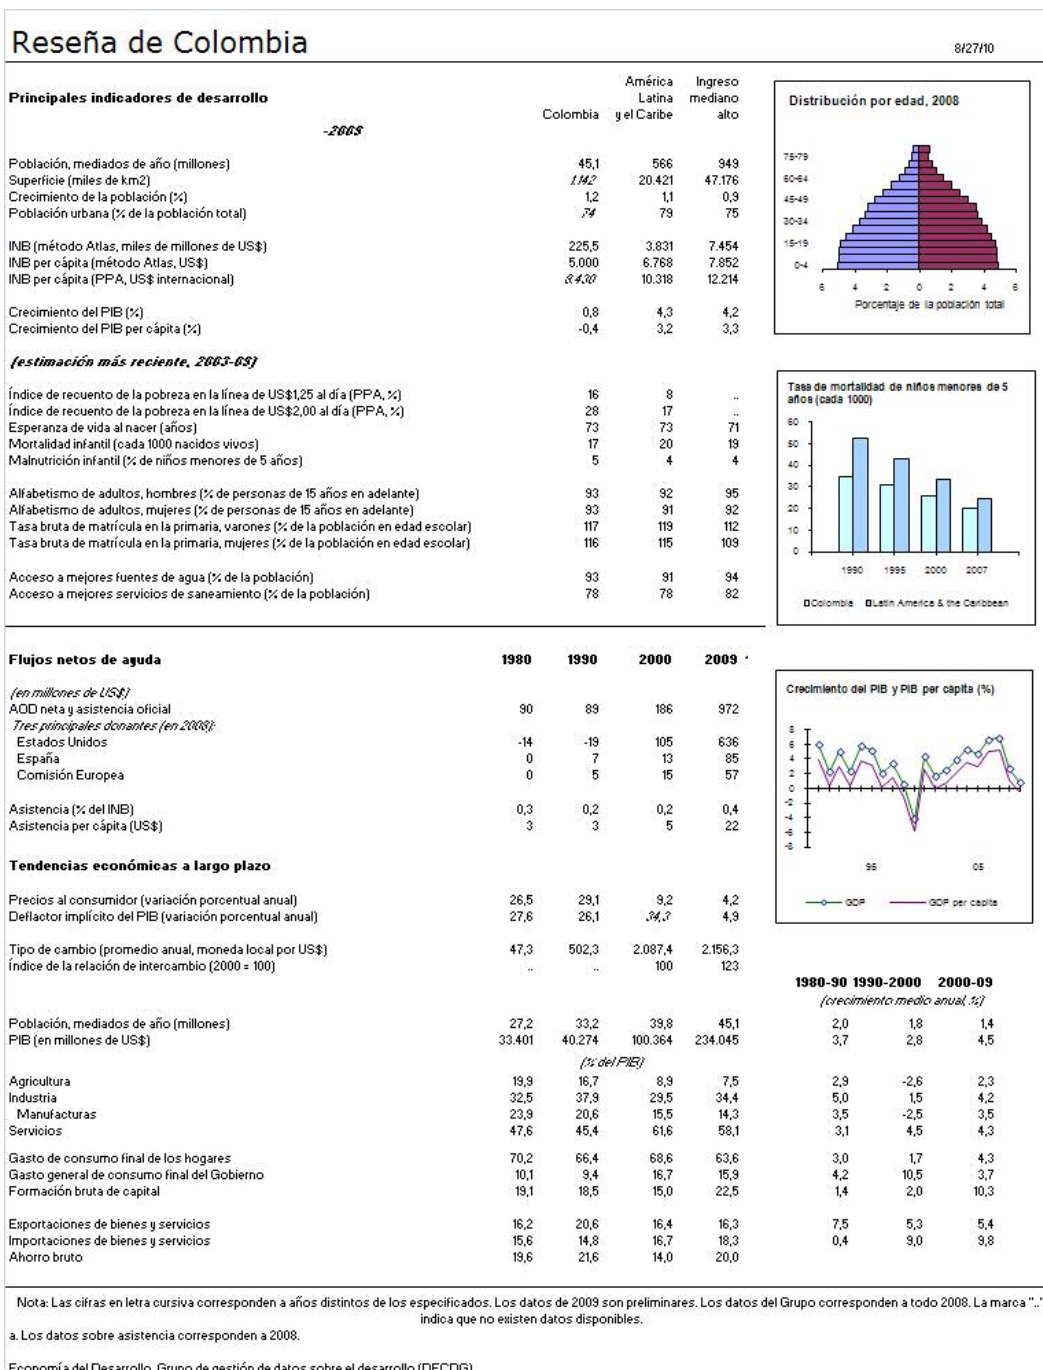

**Balanza de pagos y comercio***(en millones de US\$)*

|                                                                  | 2000   | 2009   |
|------------------------------------------------------------------|--------|--------|
| Exportaciones totales de mercancías (fob)                        | 13.158 | 32.853 |
| Importaciones totales de mercancías (cif)                        | 11.786 | 32.898 |
| Comercio neto de bienes y servicios                              | 1.411  | -148   |
| Saldo en cuenta corriente como porcentaje del PIB                | 7,70   | -5,033 |
|                                                                  | 0,8    | -2,2   |
| Remesas de trabajadores y remuneraciones de empleados (entradas) | 1.610  | 4.894  |
| Reservas, incluido el oro                                        | 9.006  | 25.365 |

**Financiamiento del Gobierno central***(% del PIB)*

|                                                |      |      |
|------------------------------------------------|------|------|
| Ingresos corrientes (incluidas las donaciones) | 23,8 | 25,1 |
| Ingresos tributarios                           | 14,4 | 18,6 |
| Gastos corrientes                              | 20,6 | 23,2 |
| Superávit/déficit general                      | -2,9 | -2,7 |
| Tasa máxima de impuesto marginal (%)           |      |      |
| Personas                                       | ..   | 33   |
| Empresas                                       | 35   | 33   |

**Deuda externa y flujos de recursos***(en millones de US\$)*

|                                                     |        |        |
|-----------------------------------------------------|--------|--------|
| Total de la deuda pendiente y desembolsada          | 33.930 | 50.489 |
| Servicio total de la deuda                          | 5.104  | 7.450  |
| Alivio de la deuda (PPME, IADM)                     | -      | -      |
| Deuda total (% del PIB)                             | 33,8   | 21,6   |
| Servicio total de la deuda (% de las exportaciones) | 27,7   | 17,1   |
| Inversión extranjera directa (entradas netas)       | ..     | ..     |
| Inversiones de cartera (entradas netas)             | 17     | -20    |

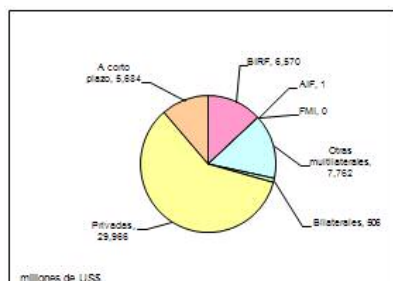**Desarrollo del sector privado**

|                                                                                                                     | 2000 | 2009 |
|---------------------------------------------------------------------------------------------------------------------|------|------|
| Tiempo necesario para iniciar un negocio (días)                                                                     | -    | 20   |
| Costos de iniciar un negocio (% del INB per cápita)                                                                 | -    | 12,8 |
| Tiempo necesario para inscribir una propiedad (días)                                                                | -    | 20   |
| Considerado un obstáculo serio a la realización de negocios (% de gerentes entrevistados que estuvieron de acuerdo) |      |      |
| Prácticas informales o anticompetitivas                                                                             | ..   | 34,5 |
| Delito                                                                                                              | ..   | 11,8 |
| Capitalización en el mercado de valores (% del PIB)                                                                 | 9,5  | 35,9 |
| Proporción entre capital y activos bancarios (%)                                                                    | 11,2 | 12,2 |

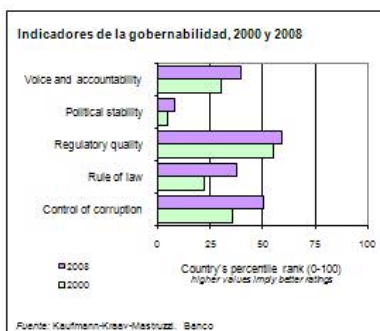**Tecnología e infraestructura**

|                                                                          | 2000 | 2008 |
|--------------------------------------------------------------------------|------|------|
| Caminos pavimentados (% del total)                                       | 14,4 | ..   |
| Teléfonos fijos y móviles número de abonados (cada 100 personas)         | 24   | 110  |
| Exportaciones de alta tecnología (% de las exportaciones manufacturadas) | 7,7  | 3,8  |

**Medio ambiente**

|                                                                                                  |        |        |
|--------------------------------------------------------------------------------------------------|--------|--------|
| Tierras agrícolas (% de la superficie de tierra)                                                 | 40     | 20     |
| Zonas forestales (% de la superficie terrestre)                                                  | 54,9   | 54,7   |
| Zonas terrestres protegidas (% de la superficie)                                                 | ..     | 26,2   |
| Recursos de agua dulce per cápita (m3)                                                           | 51,407 | 46,921 |
| Extracción de agua dulce (miles de millones de m3)                                               | 10,7   | ..     |
| Emisiones de CO2 per cápita (toneladas)                                                          | 1,5    | 1,5    |
| PIB por unidad de utilización de energía (PPA en US\$ de 2005 por kg de equivalente en petróleo) | 9,6    | 12,7   |
| Uso de energía per cápita (kg de equivalente en petróleo)                                        | 673    | 655    |

**Cartera del Grupo del Banco Mundial**

|                                                                                 | 2000  | 2009  |
|---------------------------------------------------------------------------------|-------|-------|
| <i>(en millones de US\$)</i>                                                    |       |       |
| BIRF                                                                            |       |       |
| Total de la deuda pendiente y desembolsada                                      | 1.920 | 6.570 |
| Desembolsos                                                                     | 266   | 1.331 |
| Reembolsos del principal                                                        | 242   | 213   |
| Pagos de intereses                                                              | 126   | 319   |
| AIF                                                                             |       |       |
| Total de la deuda pendiente y desembolsada                                      | 7     | 1     |
| Desembolsos                                                                     | 0     | 0     |
| Servicio total de la deuda                                                      | 1     | 1     |
| IFC (ejercicio)                                                                 | 2000  | 2008  |
| Total de la cartera desembolsada y pendiente, del cual son por cuenta de la IFC | 107   | 895   |
| Desembolsos por cuenta de la IFC                                                | 84    | 702   |
| Ventas, pagos anticipados y reembolsos de cartera por cuenta propia de la IFC   | 26    | 308   |
| MIGA                                                                            |       |       |
| Exposición bruta                                                                | 97    | 62    |
| Nuevas garantías                                                                | 0     | 0     |

Nota: Las cifras en letra cursiva corresponden a años distintos de los especificados. Los datos de 2009 son preliminares. La marca "-" indica que no existen datos disponibles. La marca "..." indica que no corresponde una observación.

8/27/10

Economía del Desarrollo, Grupo de gestión de datos sobre el desarrollo (DECDG).

# Objetivos de desarrollo del milenio

Colombia

Con metas seleccionadas que deben alcanzarse entre 1990 y 2015

(estimación más próxima a la fecha mostrada, +/- 2 años)

Colombia

## Objetivo 1: reducir a la mitad la pobreza extrema y la malnutrición

|                                                                                          | 1990 | 1995 | 2000 | 2008 |
|------------------------------------------------------------------------------------------|------|------|------|------|
| Índice de recuento de la pobreza en la línea de US\$1,25 al día (PPA, % de la población) | 8,7  | 13,5 | 16,8 | 16,0 |
| Índice de recuento de la pobreza en la línea nacional de pobreza (% de la población)     | ..   | 60,0 | 64,0 | 46,0 |
| Proporción del ingreso o consumo para el quintil más pobre (%)                           | 3,4  | 3,2  | 2,6  | 2,9  |
| Prevalencia de la malnutrición (% de niños menores de 5 años)                            | ..   | 6,3  | 4,9  | 5,1  |

## Objetivo 2: garantizar que los niños puedan completar la educación primaria

|                                                                                  |    |    |    |     |
|----------------------------------------------------------------------------------|----|----|----|-----|
| Matriculación en la escuela primaria (neta, %)                                   | 68 | .. | 90 | 87  |
| Tasa de culminación de la enseñanza primaria (% de la población en edad escolar) | 71 | 84 | 95 | 110 |
| Matriculación en la escuela secundaria (bruta, %)                                | 50 | 61 | 72 | 91  |
| Tasa de alfabetismo de jóvenes (% de personas de 15 a 24 años)                   | 95 | 96 | 97 | 97  |

## Objetivo 3: eliminar las diferencias de género en la educación y potenciar el papel de la mujer

|                                                                          |     |    |     |     |
|--------------------------------------------------------------------------|-----|----|-----|-----|
| Proporción entre niñas y niños en la educación primaria y secundaria (%) | 108 | .. | 104 | 104 |
| Mujeres empleadas en sectores no agrícolas (% de empleos no agrícolas)   | 44  | 45 | 49  | 49  |
| Proporción de mujeres que integran el parlamento nacional (%)            | 5   | 12 | 12  | 8   |

## Objetivo 4: reducir en dos tercios la mortalidad de niños menores de 5 años

|                                                                   |    |    |    |    |
|-------------------------------------------------------------------|----|----|----|----|
| Tasa de mortalidad de niños menores de 5 años (cada 1000)         | 35 | 31 | 26 | 20 |
| Tasa de mortalidad infantil (cada 1000 nacidos vivos)             | 28 | 25 | 21 | 17 |
| Inmunización contra el sarampión (% de niños de un año vacunados) | 82 | 95 | 75 | 95 |

## Objetivo 5: reducir en tres cuartos la mortalidad materna

|                                                                              |    |    |    |     |
|------------------------------------------------------------------------------|----|----|----|-----|
| Tasa de mortalidad materna (estimación modelada, cada 100 000 nacidos vivos) | .. | .. | .. | 130 |
| Partos asistidos por personal de salud calificado (% del total)              | 82 | 86 | 86 | 96  |
| Prevalencia de métodos anticonceptivo (% de mujeres de 15 a 49 años)         | 66 | 72 | 77 | 78  |

## Objetivo 6: detener y comenzar a reducir la propagación del VIH/sida y otras enfermedades graves

|                                                                    |     |     |     |     |
|--------------------------------------------------------------------|-----|-----|-----|-----|
| Prevalencia del VIH/sida (% de la población de 15 a 49 años)       | 0,1 | 0,3 | 0,5 | 0,6 |
| Incidencia de la tuberculosis (cada 100 000 personas)              | 63  | 57  | 51  | 45  |
| Tasa de detección de casos de tuberculosis (% de todas las formas) | 70  | 57  | 68  | 70  |

## Objetivo 7: reducir a la mitad la proporción de personas que carecen de acceso sostenible a servicios básicos

|                                                                                                |      |     |      |      |
|------------------------------------------------------------------------------------------------|------|-----|------|------|
| Acceso a mejores fuentes de agua (% de la población)                                           | 89   | 90  | 91   | 97   |
| Acceso a mejores servicios de saneamiento (% de la población)                                  | 68   | 71  | 74   | 78   |
| Zonas forestales (% de la superficie terrestre total)                                          | 55,4 | ..  | 54,9 | 54,7 |
| Zonas terrestres protegidas (% de la superficie)                                               | ..   | ..  | ..   | 26,2 |
| Emisiones de CO2 (toneladas per cápita)                                                        | 1,7  | 1,6 | 1,5  | 1,5  |
| PIB por unidad de utilización de energía (US\$ a PPA constantes de 2005 por kg de equivalente) | 8,2  | 8,6 | 9,6  | 12,7 |

## Objetivo 8: fomentar una asociación mundial para el desarrollo

|                                                       |     |      |      |      |
|-------------------------------------------------------|-----|------|------|------|
| Líneas de teléfono fijas (cada 100 personas)          | 7,3 | 10,6 | 18,1 | 17,9 |
| Abonados al servicio de celulares (cada 100 personas) | 0,0 | 0,8  | 5,7  | 91,9 |
| Usuarios de Internet (cada 100 personas)              | 0,0 | 0,2  | 2,2  | 38,5 |
| Computadoras personales (cada 100 personas)           | 0,9 | 1,7  | 3,8  | 11,2 |

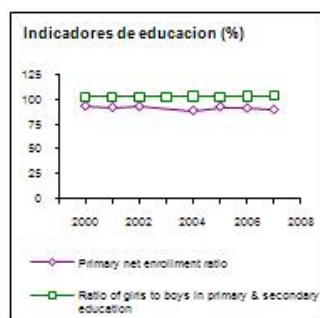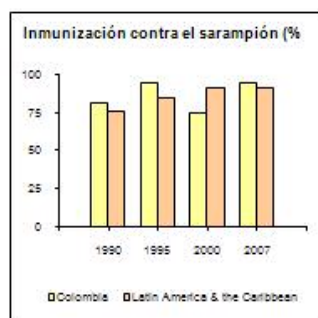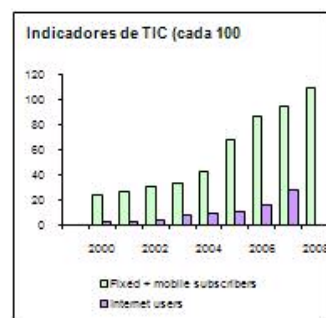

Nota: Las cifras en letra cursiva corresponden a años distintos de los especificados. La marca "..." indica que no existen datos disponibles:

8/27/10

Economía del Desarrollo, Grupo de gestión de datos sobre el desarrollo (DECDG).

**Anexo 15: Mapas BIRF 37322, 37168, 37483**

**COLOMBIA: Proyecto de Adecuación Hidráulica y Recuperación Ambiental del  
Río Bogotá**
