# Supplementary material
Source: publisher figshare collection journal article supplement (https://tandf.figshare.com/articles/dataset/_/10732607)
Supplement: Supplementary file 1 [file 2 › fjds_a_1690134_sm1263.pdf]

**República de Colombia**

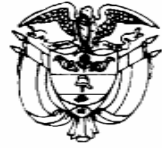

**Rama Judicial**

**TRIBUNAL ADMINISTRATIVO DE CUNDINAMARCA**  
**SECCIÓN CUARTA**  
**SUBSECCIÓN “B”**

Bogotá D.C., veinticinco (25) de agosto de dos mil cuatro (2004).

**Clase de Proceso:** Acción Popular No. 01-479  
**Procesos Acumulados:** No. 00-122; No.01-428 y 01-343  
**Accionantes :** Gustavo Moya Ángel y Otros  
**Accionado :** Empresa de Energía de Bogotá y Otros

**Magistrada Ponente:**  
**Dra. NELLY YOLANDA VILLAMIZAR DE PEÑARANDA**

**S E N T E N C I A**

Procede la Sala a proferir la correspondiente sentencia dentro del proceso acumulado de las **ACCIONES POPULARES** incoadas por los señores **GUSTAVO MOYA ÁNGEL** (acta de defunción - fl. 124, c.1-, sustituido procesalmente por su cónyuge sobreviviente, señora **SARA MARIELA PÁRRAGA** -cuya citación se dispuso por auto de 20 de octubre de 1998 , fl. 126-), **JORGE ENRIQUE CUERVO RAMÍREZ**, quienes obran por conducto de apoderado, respectivamente, y por los señores **MIGUEL ÁNGEL CHAVES GARCÍA** y **JORGE HUMBERTO GONZÁLEZ VILLANUEVA**, en procura de que se profieran órdenes tendientes a

lograr la descontaminación del **EMBALSE DEL MUÑA, EL RÍO BOGOTÁ Y DE SUS AFLUENTES.**

## **I. ANTECEDENTES DE LA DEMANDA PRINCIPAL, RADICADA BAJO EL NUMERO A.P. 01-479**

(Cuaderno 1)

El señor Moya Ángel, por conducto de apoderado judicial legalmente reconocido, **en escrito presentado el 1º de octubre de 1992**, interpuso demanda, contra la **EMPRESA DE ENERGÍA DE BOGOTÁ**, la que con posterioridad a su contestación por ésta, fue objeto de reforma en el de 29 de marzo de 1993, recibido por el juzgado el 12 de abril siguiente, en orden a que se profieran las siguientes:

### **1.1. DECLARACIONES Y CONDENAS.**

**“PRIMERA. – Se Declare que como consecuencia de los vertimientos y almacenamiento de aguas negras efectuadas por la EMPRESA DE ENERGÍA ELÉCTRICA DE BOGOTÁ sobre el denominado “Embalse del Muña”, ubicado en jurisdicción del Municipio de Sibaté, Departamento de Cundinamarca, se han producido los siguientes daños y perjuicios a la comunidad:**

- 1. “Se ha dañado de manera grave el medio ambiente y los elementos del espacio público en las áreas circunvecinas, en especial las aguas y el oxígeno elementos vitales para la comunidad.**
- 2. “Daño en la salud de los usuarios y habitantes de la región, en tanto que las malas condiciones fitosanitarias ha determinado la ocurrencia de un alto índice de enfermedades.**
- 3. “Daño a las personas en sus patrimonio, en tanto que las malas condiciones del medio ambiente han demeritado el debido aprovechamiento de sus bienes y por lo tanto afectado su valor comercial.**

**“SEGUNDA - Que en consecuencia, se condene a la EMPRESA DE ENERGÍA ELÉCTRICA DE BOGOTÁ a realizar las obras necesarias para dar el debido tratamiento a las aguas que almacena en el “Embalse del Muña”, de manera que se evite el perjuicio que viene ocasionando sobre el ambiente, el espacio público y los residentes y vecinos de la región.**

**“TERCERA - Que se ordene a la demandada, de conformidad a lo dispuesto en el inciso 2º del artículo 1005 del Código Civil Colombiano, recompensar al actor con una suma que no sea inferior de la décima parte ni exceda la tercera parte del valor de las obras necesarias que la demandada tenga que realizar para efectuar el previo tratamiento de las aguas negras que deposita en el “Embalse del Muña”.**

**“CUARTA - Que se condene en costas a la entidad demandada”.**

## 1.2. HECHOS:

Básicamente se refieren a la contaminación ambiental de toda la región aledaña al EMBALSE DEL MUÑA, cuya causa, según el accionante, es el bombeo y almacenamiento por parte de la EMPRESA DE ENERGÍA DE BOGOTÁ (la que para efectos del proceso en adelante se le conocerá como E.E.B.) de las aguas negras del RÍO BOGOTÁ, embalse que se formó con las aguas de uso público de los Ríos MUÑA Y AGUAS CLARAS, el cual **desde los inicios de la década de los años cincuenta era polo de auge y desarrollo económico del municipio de SIBATÉ**, que competía con la zona Norte de la Sabana de Bogotá.

Da cuenta el libelista, que la E.E.B. conocedora del grave daño que está ocasionando a la comunidad de SIBATÉ, ha ordenado innumerables estudios técnicos tendientes a diagnosticar la solución del problema sin que hasta la fecha de la demanda 1º de octubre de 1992, hubiese emprendido una sola obra de las recomendadas y, agrega que esos estudios apuntan como solución definitiva la construcción y el montaje de plantas de tratamiento de aguas negras antes de ser depositadas en el EMBALSE DEL MUÑA, **por lo que se hace imprescindible proceder inmediatamente a ejecutar las obras necesarias para cesar en el daño ocasionado a la comunidad** (Lo resaltado es de la Sala).

## 1.3. RESPUESTA DE LA E.E.B.

Por conducto de apoderado judicial que al efecto constituyó la E.E.B. le dio alcance al libelo genitor (fls. 59 a 62, c. No. 1), en los siguientes términos:

Admite unos hechos y niega otros y, en suma, responde que la empresa construyó el EMBALSE DEL MUÑA hace 50 años con el objeto de tener una reserva de agua para poderla utilizar en la medida que el caudal

del RÍO BOGOTÁ no fuera suficiente para la generación de energía que se hace en las plantas hidroeléctricas instaladas en el Salto, Laguneta y Mesitas del Colegio.

Empero, aduce que la contaminación a que se refiere el demandante no es por causa del embalse del Muña, sino por el agua del Río Bogotá, el cual, 50 años después de construido el embalse, se ha convertido en una cloaca, producto de los residuos químicos que las fábricas y las industrias arrojan a su lecho, así como por las aguas negras de los alcantarillados de los distintos municipios por donde pasa, incluyendo las del DISTRITO CAPITAL DE BOGOTÁ. Todo lo cual demuestra, 50 años después, que la construcción del embalse no es una acción reciente, sino el fruto de una planeación efectiva y funcional.

Con relación a la afirmación del actor sobre la no ejecución de obras para solucionar el problema, asevera que en coordinación con los habitantes del MUNICIPIO DE SIBATÉ las ha adelantado (al efecto anexa prueba documental que da cuenta de las mismas) y, anota que “no obstante que la Empresa de Energía no es la directamente responsable de la descontaminación de las aguas del Río Bogotá y, con el interés de solucionar en parte el problema a los residentes cercanos del embalse del Muña, el 6 de diciembre de 1991, celebró con la CAR el convenio No. 5709, en virtud del cual la CAR se compromete a ejecutar los estudios, obras e interventoría para la reforestación y protección de los recursos naturales y del medio ambiente, en el territorio comprendido en la hoya hidrográfica del Río Bogotá, dentro de las obligaciones que correspondan a la Empresa para cumplir con la Ley 56 de 1981, por la venta en bloque de energía en los años de 1989 y 1990 en relación con las centrales eléctricas del Río Bogotá, ...” que en fotocopia manifiesta anexar para mayor ilustración.

Respecto de la solución definitiva que según el accionante se indica en los diferentes estudios técnicos, señala que es cierto, pero anota que dentro de las funciones a su cargo no le corresponde el montaje de plantas purificadoras de las aguas del Río Bogotá, por lo que culmina

oponiéndose a las declaraciones y condenas pretensionadas, especialmente a que se ordene a la empresa a cesar los vertimientos del agua que toma del río al embalse, puesto que ella lo hace con el único fin de garantizar la generación y la prestación del servicio del fluido eléctrico y no con la intención de contaminar el ambiente. Por las mismas razones se opone al pago de la recompensa al actor.

Como excepciones de mérito interpone la que denomina como INEXISTENCIA DE LA OBLIGACION, basada en que de acuerdo con los literales d, e y f, de la Ley 3ª de 1961 es a la CAR a la que le corresponden las obras pretendidas.

#### **1.4. ACTUACIÓN SURTIDA POR EL JUZGADO SEGUNDO CIVIL DEL CIRCUITO.**

1.4.1. Con posterioridad a la contestación a la demanda por la E.E.E.B., el apoderado del actor la reformó en relación con las pretensiones, que son las que han sido transcritas en el punto 1.1. de esta sentencia (fls. 66 y 67, c.1).

1.4.2. En consideración a las prescripciones del artículo 1005 del Código Civil, en consonancia con los artículos 79 y 86 de la Carta Superior, inicialmente el proceso lo adelantó el JUZGADO SEGUNDO CIVIL DEL CIRCUITO DE BOGOTÁ, quien lo condujo en su etapa de resolución de las excepciones previas, las que fueron desatadas en forma favorable en la primera (respecto de la falta de Jurisdicción, c. Principal Anexo 3 Bis 3) y desfavorable en segunda instancia por la SALA CIVIL DEL TRIBUNAL SUPERIOR ( el cual declaró como no probadas la señaladas, como también la de Inepta demanda, revocando la decisión del a quo, c Principal 3 Bis 5) y luego del Obedézcase a lo dispuesto por el Superior, en acatamiento a lo resuelto por el ad quem por medio de auto de 8 de septiembre de 1997 (fl. 72, c.1), ordenó la notificación de la existencia del proceso al

MINISTERIO DEL MEDIO AMBIENTE, según la previsión del artículo 75 de la Ley 99 de 1993, que prevé su intervención en el proceso y, en lo concerniente al LLAMAMIENTO EN GARANTÍA dispuso reanudar el término de suspensión con el fin de realizar la respectiva citación. Actuaciones que se cumplieron respectivamente, mediante la notificación al primero el 27 de noviembre de 1998 (fl. 87 a 93, c.1), sin que hubiese registrado comentario alguno al llamado oficioso que se le hiciera, en tanto que la llamada en garantía la ASEGURADORA COLSEGUROS S.A., concurrió como sustituta procesal de la NACIONAL COMPAÑÍA DE SEGUROS GENERALES S.A la que había sido absorbida por la primera en virtud de la fusión, según así lo acredita con el Certificado de la Cámara de Comercio y el expedido por la Superintendencia Bancaria (fls. 42 a 49, c. principal 3 bis 6).

1.4.3. Al responder al llamamiento, COLSEGUROS se opone a lo pretendido por la llamada, fundamentalmente por tres razones. 1) Por Inexistencia del Riesgo Asegurable, toda vez que la contaminación de la REPRESA DEL MUÑA y los daños al ecosistema y al medio ambiente ya habían acontecido cuando se tomó la póliza, anota que el bombeo y almacenamiento no ocurrió en los años 90, 91 o 92, sino en los años 70, por ende, **eran hechos ciertos y no futuros**. Dicha excepción la apoya en el artículo 1054 del Código de Comercio; 2) Por Agravación y Ocultamiento del Riesgo Por Causas Imputables a los Interesados. Insiste en que no se cumplió la obligación contenida en el artículo 1074 Idém, pero, anota, de haber ocurrido el siniestro, el asegurado estaba en la obligación de evitar su extensión y su propagación, fuera de que estaba en la obligación de noticiarlo al asegurador, según lo prescrito en el artículo 1074 ibídem, dentro de los tres días siguientes a la fecha en que lo haya conocido o debido conocerlo, siendo que la Aseguradora llamada en garantía, sólo se enteró de la ocurrencia de los hechos una vez que fue notificada en el proceso; 3) Prescripción de la Acción, aduce que en atención a que desde la fecha en que la E.E.E.B. recibió notificación de la

demanda y aquella en que fue notificada la llamada (4 de marzo de 1998), transcurrieron más de los 2 años previstos en el artículo 1081, en concordancia con lo preceptuado en el 1131 de la misma obra. Finalmente, se opone también a la pretensión de recompensa en consideración a que se trata de un siniestro no amparable de acuerdo con lo estipulado en la Póliza de Seguros, cuyo soporte jurídico subyace en el artículo 1005 del mismo estatuto mercantil.

1.4.4. A su turno, en escrito separado y ejerciendo la litis contestatio, la E.E.B. le denunció el pleito a la CORPORACIÓN AUTÓNOMA REGIONAL DE LAS CUENCAS DE LOS RÍOS BOGOTÁ, UBATÉ Y SUÁREZ, por cuanto de conformidad con los literales d), e) y f) del artículo 4 de la Ley 3ª de 1961 -la cual la creó-, es la competente para regular e implementar todas las políticas encaminadas a la descontaminación de las aguas, en consecuencia, señala que no es la empresa a la que le corresponde ejercer el control sobre la contaminación de las aguas del RÍO BOGOTÁ, sino, por el contrario, es afectada en cuanto sus equipos para la generación de energía tienen un período de duración bastante significativo (c. Principal, Anexo 3 Bis 4) .

1.4.4.1. Con fundamento en el artículo 54 del Código de Procedimiento Civil, por auto de 27 de abril de 1993, el Juzgado le concedió el término de 5 días, so pena de rechazo, para que la E.E.B. aportara el certificado de representación legal del denunciado (fl. 5, c.ídem).

1.4.5. Por auto de 15 de enero de 1999 se abrió el proceso a pruebas, el juez de conocimiento inicial, decretó y practicó unos testimonios, como también la inspección judicial con exhibición de documentos en las oficinas de la E.E.B., a la vez que al EMBALSE DEL MUÑA con intervención de peritos. Se dispuso tener como pruebas toda la documental aportada por la demandada y por la llamada en garantía (fls. 129 y 130, c.1), las cuales fueron evacuadas (fls. 201 a 206: interrogatorio de

parte absuelto por el representante legal de la E.E.B., fls. 242 a 251, testimonios de JORGE ENRIQUE ROZO RODRÍGUEZ y de ARNOLDO VÁSQUEZ ESCOBAR) con excepción de los testimonios de JOSÉ URIEL GONZÁLEZ Y DE JAIRO LINARES, de los cuales desistió el apoderado del actor (fls. 286 y 287, c.1)

### **1.5. ACTUACIÓN SURTIDA ANTE EL TRIBUNAL CONTENCIOSO ADMINISTRATIVO, SECCIÓN CUARTA.**

1.5.1. El aludido juzgado de conocimiento, acogiendo el concepto del señor Agente del Ministerio Público, por auto de 5 de julio de 2001, dispuso el envío del proceso a este tribunal, (fls. 486-487). Llegado el expediente a esta corporación, por reparto correspondió su sustanciación al despacho de la Magistrada NELLY YOLANDA VILLAMIZAR DE PEÑARANDA, quien mediante auto de 31 de agosto de 2001 de Sala de Decisión que presidió, avocó su conocimiento al considerarse que de acuerdo con las previsiones de la Ley 472 de 1998 que regula lo concerniente a las Acciones Populares y de Grupo, la competencia se radicaba en la Jurisdicción de lo Contencioso Administrativo por tratarse de demanda contra la EMPRESA DE ENERGÍA ELÉCTRICA DE BOGOTÁ, que al ser una sociedad comercial por acciones asimilada a una sociedad anónima del Distrito Capital, cuyo objeto es la prestación de un servicio público, de acuerdo con lo preceptuado en el artículo 17 de la Ley 142 de 1994 (fls. 305 a 307, c.1), radicaba la competencia para continuar conociendo de la presente acción en esta jurisdicción. En dicho proveído se dejó claro que lo actuado hasta esa etapa conservaba validez. Lo dispuesto en tal sentido no fue objeto de recurso alguno por las partes en contienda y fue notificado personalmente al PROCURADOR TERCERO JUDICIAL ante el tribunal (fl. 308, c.1).

1.5.2. AUDIENCIA DE PACTO DE CUMPLIMIENTO.- En el señalado proveído se dispuso señalar fecha para llevar a cabo la

Audiencia de Pacto de Cumplimiento consagrada en la aludida Ley 472, como trámite de rigor en esta clase de procesos, por lo que se libraron sendos telegramas a las partes en contienda, como también a la sociedad EMGESA S.A., en razón a la petición previamente formulada por la apoderada de la E.E.E.B., de conformidad con lo regulado en el artículo 60 del Código de Procedimiento Civil (a las que se les libró sendos telegramas –fls. 309 a 312, c.1).

1.5.2.1. Llegado el día de la audiencia se resolvió tener a la **EMPRESA GENERADORA DE ENERGÍA “EMGESA”** en su condición de litisconsorte necesario y no como sustituto de la E.E.E.B., a la vez que se llamó en condición de demandados al **DISTRITO CAPITAL DE BOGOTÁ** y al **DEPARTAMENTO DE CUNDINAMARCA**, como también a todos los municipios que se encuentran en la cuenca del Río Bogotá, según certificación que fue expedida con destino al proceso por la “CAR”, tales **VILLAPINZÓN, CHOCONTÁ, SUESCA, SESQUILÉ, GACHANCIPÁ, TOCANCIPÁ, ZIPAQUIRÁ, SOPÓ, CAJICÁ, CHÍA, COTA, BOGOTÁ-D.C., FUNZA, MOSQUERA, SOACHA y SIBATÉ**. A su turno, se vinculó como demandada a la **CORPORACION AUTÓNOMA REGIONAL, “CAR”**. Cumplida la notificación y el traslado de la demanda con cada uno de los representantes legales de dichos entes, éstos, por conducto de apoderado judicial unos y, otros por sí mismos, procedieron a responderla.

1.5.3. Con posterioridad el apoderado judicial legalmente reconocido de EMGESA, solicitó la acumulación de la Acción Popular radicada bajo el No. 000122 que se le venía adelantando a su poderdante junto con otros demandados, en el despacho del magistrado **CARLOS ENRIQUE MORENO RUBIO** (fl. 441, c.1), a lo cual se accedió mediante auto de Sala de Decisión de 28 de febrero de 2002 (fl. 703 a 704, c.1).

1.5.4. Por auto de 20 de marzo de 2002, se dispuso la vinculación del MUNICIPIO DE SESQUILÉ y la notificación personal a su alcalde de la presente Acción Popular (fls. 708 a 709, c.1).

1.5.4.1. En el mismo proveído se reconoció personería para actuar a los apoderados de los municipios y entidades que hasta dicho momento habían concurrido, como también la actuación de los alcaldes de los municipios de CHÍA Y CHOCONTÁ, se aceptó el llamamiento en garantía que hiciera EMGESA S.A. de las siguientes empresas **LÍQUIDO CARBÓNICO COLOMBIANA S.A., COMPAÑÍA NACIONAL DE VIDRIOS S.A. “CONALVIDRIOS S.A”, ETERNIT COLOMBIANA S.A, PROTEÍNAS Y ENERGÉTICOS DE COLOMBIA S.A. “PROTEICOL S.A”, EMPRESA COLOMBIANA DE CABLES S.A. ESPUMADOS S.A., DISTRIBUIDORA TROPIABASTOS LTDA., STANTON Y CIA S.A., SIDERÚRGICA DE BOYACÁ S.A. “SIDIBOYACÁ”, UNIABASTOS S.A. EN LIQUIDACIÓN, INDUSTRIAS SPRING S.A, MALTERÍAS DE COLOMBIA S.A., REFINADORA DE SAL S.A, ALPINA PRODUCTOS ALIMENTICIOS S.A. PAPELES Y MOLINOS S.A., hoy PAPELES Y CORRUGADOS ANDINA S.A. Y CERVECERÍA LEONA S.A.** (fl. 710), todas las cuales fueron vinculadas con posterioridad en su condición de demandadas, en razón a que por auto de 1º de abril siguiente, se revocó el citado llamamiento (fls. 715 a 717, c.1), al ser consideradas como agentes contaminadores del agua del RÍO BOGOTÁ y, en cuanto a la EMPRESA DE ENERGÍA DE BOGOTÁ S.A., EL DISTRITO CAPITAL DE BOGOTÁ Y LA EMPRESA DE ACUEDUCTO Y ALCANTARILLADO DE BOGOTÁ Y EL MUNICIPIO DE SIBATÉ se negó, al encontrarse que se había integrado el contradictorio con los mismos, en razón a que asumían la condición de demandados.

1.5.4.1.1. Dicha decisión fue recurrida por el apoderado de la llamante en escrito presentado el 2 siguiente (fls. 736 a 738, c.1). Su inconformidad la hizo consistir en que una cosa es la controversia entre los demandantes y quienes aparecen como codemandados y, otra, es el litigio mediante el llamamiento en garantía entre codemandados, pues lo que, agrega, se busca es que este aspecto se resuelva en el mismo proceso una vez que el juez haya decidido sobre la cuestión principal, determinando si el llamado debe reintegrarle suma alguna al llamante en virtud de la indemnización que éste tuviere que pagar al demandante. Anotó que en el fondo es la acción subrogatoria ejercida por uno de los coautores del daño, que indemniza a los demandantes, contra los otros responsables y podría ser que EMGESA fuese condenada y si no se aceptaba ese llamado, tendría que iniciar un segundo proceso de repetición contra los otros responsables, en cambio, si se admite tendrá un título ejecutivo para repetir, para el caso que se le llegue a ejecutar, todo lo cual, culmina, no es excluyente.

1.5.4.1.2. Por auto de 29 de abril siguiente, se denegó la reposición aludida con las mismas razones del proveído recurrido, además de que se advirtió la ausencia de contrato o la falta de ley que obligue a los llamados a responderle a EMGESA por los daños y perjuicios que le pudieren corresponder como llamante. En ese orden, se concedió la apelación (fls. 789 a 795, c.1), impugnación que fue rechazada por el Consejo de Estado por auto de 6 de febrero de 2003, con ponencia del Consejero Doctor MARIO ALARIO MÉNDEZ, en consideración a que el recurso vertical estaba consagrado sólo contra la sentencia y contra el auto que decreta medidas cautelares (fls. 67 a 70, c.2da inst.), confirmando, en consecuencia, la decisión recurrida.

1.5.5. Mediante auto de fecha 31 de mayo de 2002, se acumularon los procesos Nos. 01-343 y 01-428, los cuales cursaban en el despacho de la

Magistrada doctora MARTHA ROSA BETANCUR RUÍZ. (fls.1655-1665 c.p. No.3)

1.5.6. Por auto calendado 19 de junio de 2002, se dio por contestada la demanda y se reconoció personería jurídica al Distrito Capital, la sociedad Eternit Colombiana S.A., Líquido Carbónico Colombiana S.A., Cristalería Peldar S.A., Compañía Nacional de Vidrios S.A., Refisal, Alpina, Distribuidora Tropiabastos LTDA, Grupo Siderúrgico Diaco, Stanton & CIA S.A., Espumados S.A., Papeles y Corrugados Andina S.A., Empresa Colombiana de Cables EMCOCABLES S.A., Proteínas y Energéticos de Colombia S.A., Uniabastos en Liquidación, Malterías de Colombia S.A., y el Municipio de Sesquilé.

1.5.7. En proveído de 1 de agosto del año 2002, se dio curso al incidente de nulidad de la notificación personal y cualquier actuación posterior, propuesto por las sociedades Eternit Colombiana S.A., Líquido Carbónico Colombiana S.A., Cristalería Peldar S.A., Grupo Siderúrgico Diaco S.A., Refisal, Cervecería Leona S.A., Alpina y Empresa Colombiana de Cables en Reestructuración. Así mismo, se tuvo por contestada la demanda por parte de Industrias Spring S.A. y por la Corporación Autónoma Regional (fls. 1867-1871 c.p. No.3)

1.5.8. Por medio de auto de 30 de agosto del año 2002, se negó el recurso de reposición interpuesto por PROTEICOL S.A., por medio del cual pretendía se declarara la nulidad de los actos procesales de notificación de la demanda, por carecer de soporte que lo respaldara en cuanto en el expediente no obraba su escrito de contestación. De otro lado, se declaró la nulidad de las diligencias de notificación practicadas a las sociedades Eternit Colombiana S.A., Líquido Carbónico Colombiana S.A., Cristalería Peldar S.A., Grupo Siderúrgico Diaco S.A., Refisal, Cervecería Leona S.A., Alpina y Empresa Colombiana de Cables Emcocables en Reestructuración (fls. 1898-1906 c.p. No.3).

1.5.9. Por auto de 26 de noviembre del año 2002, se negó la solicitud impetrada por Eternit Colombiana S.A., Líquido Carbónico Colombiana S.A., Cristalería Peldar S.A., Grupo Siderúrgico Diaco S.A., Refisal, Cervecería Leona S.A., Alpina y Empresa Colombiana de Cables Emcocables en Reestructuración, por medio de la cual buscaban adicionar la nulidad decretada a la notificación personal para todas las actuaciones posteriores, siendo la razón de la negación el que tales actuaciones sólo habían girado en torno a la constitución de la relación jurídico procesal, sin que se hubiese adelantado otra etapa del proceso (fls. 1965-1969 c.p. No. 3).

1.5.10. Por medio de auto de 19 de diciembre del año 2002, se rechazó de plano el recurso de reposición interpuesto por el apoderado de la EMPRESA COLOMBIANA DE CABLES EMCOCABLES S.A., para que a su representada no se le tuviera como demandada, ni como llamada en garantía en el proceso, habida cuenta de su extemporaneidad, fuera de que se trataba de un asunto que había sido objeto de pronunciamiento a lo largo del trámite de la acción (fls. 2075-2083 c.p. No.3).

1.5.11. Mediante auto de fecha 19 de diciembre de 2002 (fls. 2075-2083 c.p. #3), se fijó fecha para la continuación de la diligencia especial de que trata el artículo 27 de la Ley 472 de 1998, la cual tuvo lugar el día 14 de febrero de 2003, a la que asistieron el Procurador Tercero en lo judicial con funciones ante esta corporación, los actores y los apoderados judiciales de: PROTEICOL S.A., E.A.A.B., Municipio de Mosquera, Municipio de Sibaté, Superintendencia de Servicios Públicos, Ministerio de Hacienda, C.A.R., Grupo Siderúrgico DIACO S.A., Alcaldía de la Calera, EMCOCABLES, Personería de Bogotá, Municipio de Madrid, Municipio de Tabio, Secretaría de Salud de Cundinamarca, ASOMUÑA, Municipio de Sesquilé, COLSEGUROS S.A., Municipio de Cajicá, Municipio de Zipaquirá, Contraloría de Cundinamarca, Ministerio del

Medio Ambiente, Departamento Nacional de Planeación, Ministerio de Minas y Energía, Ministerio de la Protección Social, Alcaldía Mayor de Bogotá, Beneficencia de Cundinamarca, Ministerio de Comercio Industria y Turismo, Instituto Geográfico Agustín Codazzi, Secretaría Distrital de Salud, EMGESA, Instituto de Meteorología y Estudios Ambientales, Fondo de Previsión Social del Congreso de la República, Municipio de Chía, STANTON & Cia S.A., Municipio de Sopó, ALPINA, EMSERSOPO, Procuraduría Delegada para Asuntos Ambientales y Agrarios, Bogotana de Aguas S.A. E.S.P., Papeles y Corrugados Andina S.A., Ministerio de Educación Nacional, TROPIABASTOS S.A., Municipio de Tenjo, Gobernación de Cundinamarca, Municipio de Tocancipá, Empresa de Energía de Bogotá, UNIABASTOS, Municipio de Gachancipá, D.A.M.A., Industrias Spring S.A. Municipio de Funza, C.R.A., Municipio de Cota, Municipio de Chocontá, Municipio de Villapinzón, Municipio de Suesca.

1.5.12. Después de referirse a la insistencia de las nulidades impetradas por el apoderado de las mencionadas industrias y a la afirmación del apoderado del Ministerio del Medio Ambiente sobre su intervención dentro de la audiencia de pacto, en cuanto ya había concurrido a la celebración del mismo en los demás procesos acumulados, la Magistrada Sustanciadora dispuso la instalación de “Mesas de Trabajo”, con el objetivo de demarcar las pautas que dieran curso a las acciones tendientes a la recuperación del RÍO BOGOTÁ, para lo cual definió los grupos de trabajo encargados de estudiar y presentar alternativas de solución al problema ambiental, incluyendo en ese contexto a las siguientes entidades (fls. 2322-2334 c.p. No. 4). *LOS ENTES MINISTERIALES LLAMADOS EN LA PRESENTE ACCIÓN, LA EMPRESA DE ACUEDUCTO Y ALCANTARILLADO DE BOGOTÁ, EL DEPARTAMENTO DE PLANEACIÓN NACIONAL, EL DISTRITO CAPITAL DE BOGOTÁ- DAMA, LA CAR, EL IDEAM, EMGESA, EL DEPARTAMENTO DE CUNDINAMARCA, LOS MUNICIPIOS DE SIBATÉ, CHOCONTÁ Y VILLAPINZÓN.*

1.5.12.1. Posteriormente, fueron llamados a las mesas de trabajo los demás municipios que no habían sido vinculados, quienes en adelante participaron en todas las demás audiencias, como también vinieron al escenario del proceso los diferentes sectores de la producción, tales el gremio de los floricultores, lácteos, cárnicos, curtiembres, minero y de los tejares, quienes presentaron alternativas en los diferentes procesos de producción que venían adelantando.

Las MESAS DE TRABAJO que se llevaron a cabo se realizaron bajo el siguiente cronograma:

| FECHA DE REALIZACIÓN | EXPOSITOR                                                                                   |
|----------------------|---------------------------------------------------------------------------------------------|
| Febrero 21 de 2003   | Empresa de Acueducto y Alcantarillado de Bogotá EAAB-                                       |
| Marzo 7 de 2003      | Corporación Autónoma Regional – CAR-, Empresa de Acueducto y Alcantarillado de Bogotá EAAB- |
| Marzo 14 de 2003     | Empresa de Acueducto y Alcantarillado de Bogotá EAAB-                                       |
| Marzo 21 de 2003     | Distrito Capital – Departamento Administrativo del Medio Ambiente –DAMA-                    |
| Marzo 28 de 2003     | Departamento Administrativo del Medio Ambiente –DAMA-                                       |
| Abril 4 de 2003      | Empresa de Acueducto y Alcantarillado de Bogotá EAAB-                                       |
| Abril 10 de 2003     | Empresa de Energía de Bogotá                                                                |
| Abril 25 de 2003     | EMGESA                                                                                      |
| Mayo 2 de 2003       | Municipios de Madrid, Sopó, Zipaquirá, Sibaté, Cajicá,                                      |

|                  |                                                                                                                                                                                                                                                             |
|------------------|-------------------------------------------------------------------------------------------------------------------------------------------------------------------------------------------------------------------------------------------------------------|
|                  | Tocancipá, Villapinzón, Chocontá, Funza, Chía, Suesca, Gachancipá, Cota, Mosquera, Soacha                                                                                                                                                                   |
| Mayo 6 de 2003   | Corporación Autónoma Regional – CAR-, Empresa de Acueducto y Alcantarillado de Bogotá EAAB, Municipios de Villapinzón, Sibaté y Cajicá, Distrito Capital de Bogotá, EMGESA, Empresa de Energía, Ministerio de Minas y Energía y Departamento de Planeación. |
| Mayo 9 de 2003   | Fundación al Verde Vivo                                                                                                                                                                                                                                     |
| Mayo 23 de 2003  | Departamento de Cundinamarca                                                                                                                                                                                                                                |
| Mayo 30 de 2003  | Corporación Ecológica de San Benito –COESA-, Cooperativa Integral de Curtidores – COOPICUR-                                                                                                                                                                 |
| Junio 6 de 2003  | Ministerio de Ambiente, Vivienda y Desarrollo Territorial, Ministerio de Educación Nacional.                                                                                                                                                                |
| Junio 13 de 2003 | Ministerio de Agricultura y Desarrollo Rural                                                                                                                                                                                                                |
| Julio 4 de 2003  | Ministerio de Salud, Ministerio de Hacienda y Crédito Público                                                                                                                                                                                               |

1.5.12.2. Igualmente participaron en las mesas de trabajo los diferentes gremios de la producción como el de los productos Cárnicos, Lecheros, Floricultores, el Sector Minero y de los Tejares, entre otros. Algunas de esas industrias fueron visitadas por la Magistrado Sustanciadora en compañía de los técnicos ambientales de la CAR y del DAMA, con la

asistencia de los apoderados de algunas de las demandadas, como quedó consignada en las diferentes actas.

1.5.12.3. En la Mesa de Trabajo de fecha 4 de Julio del año 2003, se ordenó la suspensión de las mismas, y se les concedió término a las partes vinculadas al proceso para presentar y registrar los proyectos de pacto de cumplimiento hasta el día 22 de agosto de 2003, el que por auto de la misma fecha se prorrogó a petición de los apoderados de la EAAB, de EMGESA y de la EEB, hasta el día 8 de septiembre (fl. 2875 c.p. No. 5).

1.5.13. Registrados los proyectos de pacto de cumplimiento se llevaron a cabo las diferentes audiencias para su presentación y discusión por las demás partes involucradas con el fin de que consignaran sus críticas e inconformidades frente a los mismos. En atención a las modificaciones propuestas con la conducción de la Magistrada Sustanciadora, los proponentes procedieron a realizarles los ajustes correspondientes, y después de haberse llevado a cabo unas mesas de trabajo en la que participaron los técnicos de las diferentes entidades públicas demandadas con la moderación de la Magistrada y la asistencia del Técnico Ambiental Asistente del Procurador Tercero Judicial, para definir la Solución Técnica Integral del RÍO BOGOTÁ y de sus AFLUENTES, las partes procedieron a impartirles su aprobación en audiencias que para tal efecto se continuaron, dejando a consideración de la Sala la decisión respecto de los puntos en que no estuvieron de acuerdo.

1.5.14. De igual manera, en consideración a que la descontaminación del RÍO BOGOTÁ obedece a un criterio único que se denominó por los expertos en la materia SOLUCIÓN TÉCNICA INTEGRAL, respecto de la cual los entes involucrados no asumieron con sus propios recursos para la ejecución de algunas obras, tales el INTERCEPTOR TUNJUELO-CANOAS y el interceptor CANOAS-ALICACHÍN, como LA

ESTACIÓN ELEVADORA y LA PLANTA DE CANOAS, se acordó que el tribunal prohiriera las declaraciones y condenas pertinentes con el fin de salvaguardar los derechos colectivos amenazados y vulnerados, con el asentimiento por todas las partes en cuanto a que los puntos de los respectivos pactos que no fuesen materia de aprobación por el tribunal serían susceptibles del recurso de apelación como también lo serían las respectivas condenas tendientes a la ejecución de las obras acordadas, pero respecto de las cuales las partes no hubieren definido con cargo a qué recursos se podrían llegar a construir.

1.5.15. En consideración a lo acabado de exponer, la Magistrada Sustanciadora mediante auto calendado 27 de noviembre de 2003 abrió el proceso a pruebas y ordenó tener como tales los documentos aportados con la demanda y con los escritos de contestación, así como los allegados al proceso como producto de las mesas de trabajo y con los respectivos proyectos de Pacto de Cumplimiento presentados (fls. 4180-4186 c.p. No. 7).

1.5.15.1. De igual forma, se ordenó tener como pruebas las visitas técnicas realizadas a los diferentes lugares y municipios de la cuenca del Río Bogotá, así como a las industrias privadas vinculadas, las cuales constan en las respectivas actas (fls. 2564 a 2566, 2710-2711 y 2674-2676 del c.p. No. 4)

1.5.15.2. También se decretó como prueba el documento Técnico elaborado por los integrantes de la Mesa de Trabajo designada por el Despacho con los anexos que lo componen.

1.5.15.3. Así mismo, se tuvo como prueba el dictamen pericial rendido por los Auxiliares de la Justicia Ingenieros, FABIO ROBERTO PÉREZ Y JOSÉ MANUEL GONZÁLEZ, experticio que fue decretado inicialmente por el JUZGADO SEGUNDO CIVIL DEL CIRCUITO

dentro de la acción popular instaurada por GUSTAVO MOYA ÁNGEL, pero en atención a la remisión del expediente a este tribunal por dicho despacho, sólo fue presentado ante esta corporación el día 8 de octubre de 2003 (ver Anexo 3 Bis al c.No. 9p), y del cual se corrió traslado a las partes en proveído de fecha 27 de noviembre siguiente, contra el cual se presentaron objeciones.

1.5.15.3.1. Por auto calendado 18 de febrero de 2004 (fls. 4430-4435 c.p. No. 8), se negó la objeción por error grave del dictamen pericial impetrada por EMGESA y por el MUNICIPIO DE SIBATÉ (fls. 4384-4394 y 4403-4414 c.p. No. 8), como también no se accedió a la solicitud de aclaración y complementación del dictamen presentado por la CAR en atención a que los puntos sobre los que se elevaron las peticiones eran más de valoración probatoria en la sentencia. En éste mismo proveído se dio por agotada la etapa probatoria y se corrió traslado a las partes para alegar de conclusión, traslado que fue recurrido por la CAR en consideración a que se concedió el término previsto en el Código de Procedimiento Civil. y no el que señala la Ley 472 de 1998.

1.5.15.4. Registraron alegatos de conclusión las siguientes partes, en los que reiteran las posiciones que plantearon en sus respectivos escritos de contestación, como también comentarios a los diferentes pactos de cumplimiento, a los que se referirá la Sala en la parte considerativa:

- Actores de la Acción Popular No. 122 señores Miguel Ángel Chávez García, Jorge Humberto González V. y Nicolás Díaz Roa (fls. 4436 a 440 del cuaderno No. 8).
- Municipio de Madrid (fls. 4441 a 4445 del cuaderno No. 8).
- Sociedad Papeles y Corrugados Andina S. A. (fls. 4446 y 4447 / 4838 y 4839 del cuaderno No. 8).
- Sociedad Stanton y Cía S. A. (fls. 4448 / 4840 del cuaderno No. 8).

- Instituto de Hidrología, Meteorología y Estudios Ambientales IDEAM (fls. 4465 y 4466 del cuaderno No. 8).
- Alpina Productos Alimenticios S. A. – ALPINA- (fl. 4467 Cuaderno No. 8)
- Eternit Colombiana S. A. (fl. 4467 Cuaderno No. 8)
- Líquido Carbónico Colombiana S.A.. (fl. 4467 Cuaderno no. 8)
- Sociedad Cristallera Peldar S.A. (fl. 4467 Cuaderno No. 8)
- Refinadora de Sal S. A. –REFISAL- (fl. 4467 Cuaderno No. 8)
- Cervecería Leona S.A. (fl. 4467 Cuaderno No. 8)
- Grupo Siderúrgico DIACO S. A. (fl. 4467 del cuaderno No. 8).
- Municipio de La Calera (fls. 4474 y 4475 del cuaderno No. 8).
- Comisión de Regulación de Agua Potable y Saneamiento Básico – CRA (fls. 4478 a 4485 del cuaderno No. 8).
- Municipio de Facatativá (fls. 4498 a 4502 del cuaderno No. 8).
- Nación – Ministerio de Ambiente Vivienda y Desarrollo Territorial (fls. 4503 a 4508 / 4845 a 4850 del cuaderno No. 8).
- Empresa Colombiana de Cables S. A. – EMCOCABLES en Reestructuración (fls. 4509 a 4512 del cuaderno No. 8).
- Municipio de Chocontá (fls. 4513 a 4516 del cuaderno No. 8).
- Departamento Técnico Administrativo del Medio Ambiente – DAMA (fls. 4517 a 4520 / 4841 a 4844 del cuaderno No. 8).
- Municipio de Cota (fls. 4521 a 4523 del cuaderno No. 8).
- Departamento Nacional de Planeación (fls. 4525 a 4530 del cuaderno No. 8).
- Alcaldía Mayor de Bogotá (fls. 4531 a y 4532 / 4853 y 4854 del cuaderno No. 8).
- Ministerio de la Protección Social (fls. 4533 a 4541 del cuaderno No. 8).
- EMGESA (fls. 4542 a 4548 / 4881 a 4888 del cuaderno No. 8).
- Aseguradora Colseguros S. A. (fls. 4549 a 4553 del cuaderno No. 8).

- Ministerio de Agricultura y Desarrollo Rural (fls. 4554 a 4557 del cuaderno No. 8).
- Municipio de Sopó (fls. 4564 y 4565 del cuaderno No. 8).
- Secretaría de Salud – Alcaldía Mayor de Santafé de Bogotá (fls. 4567 a 4579 del cuaderno No. 8).
- Ministerio de Minas y Energía (fls. 4607 a 4620 del cuaderno No. 8).
- Empresa de Energía de Bogotá S. A. ESP (fls. 4623 a 4634 del cuaderno No. 8).
- Personería de Bogotá (fls. 4635 a 4642 del cuaderno No. 8).
- Gobernación del Departamento de Cundinamarca (fls. 4648 y 4649 del cuaderno No. 8).
- Sociedad Bogotana de Aguas y Saneamiento Suez – Lyonnaise Deseaux Degremont E. S. P. S. A. (fls. 4684 a 4689 del cuaderno No. 8).
- Sociedad Industrias Spring S.A. (fls. 4690 y 4691 del cuaderno No. 8).
- Ministerio de Educación Nacional (fls. 4692 a 4696 del cuaderno No. 8).
- Empresa de Acueducto y Alcantarillado de Bogotá E. A. A. B. - ESP (fls. 4697 a 4701 del cuaderno No. 8).
- Gustavo Moya Ángel, actor popular (fls. 4771 a 4797 / 4855 a 4880 del cuaderno No. 8).
- Procurador Tercero Judicial en lo Administrativo (fl. 4706 del cuaderno No. 8).
- Instituto Geográfico Agustín Codazzi (fls. 4851 y 4852 del cuaderno No. 8).
- Municipio de Gachancipá (fls. 4892 a 4895 del Cuaderno No. 9).
- Corporación Autónoma Regional de Cundinamarca–CAR- (fls. 4931 a 4946 del Cuaderno No.9).
- Personería de Bogotá D. C. (fls. 4947 a 4949 del Cuaderno No. 9).

- Jorge Enrique Cuervo Ramírez en su calidad de accionante (fls. 4950 a 4966 del Cuaderno No. 9).
- Departamento de Cundinamarca (fls. 4972 a 4975 del Cuaderno No. 9).
- Ministerio Público (fls. 5042 a 5052 del Cuaderno No. 9).

1.5.15.5. ALEGATOS DE LA CAR. En atención a que la CAR muestra una posición de contradicción frente a las demás partes involucradas, concretamente con respecto a los municipios y al DISTRITO CAPITAL-EAAB, se considera pertinente, para efectos del análisis de los pactos como de las demás órdenes a impartir, hacer referencia a su escrito de alegatos de conclusión, atendiendo a la nueva dirección que la preside después de la presentación, discusión y aprobación por esta entidad como por las demás partes de su propuesta de pacto.

1.5.15.5.1. Se aduce que en ejercicio de sus funciones, otorga permisos, concesiones y autorizaciones para el uso del suelo y demás recursos naturales; y el 70 % de las mismas conforme a la Ley 99 de 1993, corresponden al ejercicio propio de autoridad ambiental, **encuadrándose en los principio de eficacia, eficiencia y economía para evaluar la viabilidad de cualquier proyecto o actividad que requiera su aprobación o patrocinio pero en subsidiariedad.**

1.5.15.5.2. Así mismo, se indica que en las audiencias de pacto, se determinó claramente cómo los vertimientos domésticos provenientes de Bogotá, son la principal y determinante causa de la muerte del Río y que si la responsabilidad de saneamiento es del Distrito, lo mismo se podría decir de los municipios de la cuenca alta y media margen occidental.

1.5.15.5.3. De otra parte, acerca de la Cuenca Alta de la Margen Occidental, advierte que quedó probado en primer lugar, que no todas las aguas residuales son conducidas por la red de alcantarillado a las Plantas

de Tratamiento, lo que genera una responsabilidad a cargo de los municipios; en segundo lugar, que la CAR construyó con recursos propios Plantas de Tratamiento que tenían como condición óptima de funcionamiento que las redes entregaran a la planta las aguas residuales; en tercer lugar, que los municipios no han cumplido con dos obligaciones a su cargo como son: entregar la totalidad de las aguas residuales a las plantas y recibir su operación, administración y mantenimiento; y en cuarto lugar, que la mora en el recibo de las plantas ha generado de una parte, que la operación, administración y mantenimiento de las mismas, haya tenido que ser asumida por la CAR que se ha visto obligada a causa de la reticencia de los municipios a distraer recursos dedicados a objetos ambientales, a cumplir las obligaciones propias de los municipios (saneamiento básico) con la consecuencia del desmedro ambiental que ello genera, como lo es el que las plantas hayan sufrido un deterioro natural que ahora sobrecarga el presupuesto de la CAR, en el que los municipios que son los responsables del riesgo por la mora en recibirlas, quienes no han querido invertir para que sea la CAR la que asuma la optimización de las plantas.

1.5.15.5.4. Sobre la Cuenca Media Oriental, anota que mediante indicadores científicos de carácter físico biológico que dan cuenta de las condiciones del Río Bogotá, se demostró que éste pierde la vida por las descargas que le genera Bogotá, y en esas condiciones, **a pesar de los esfuerzos de la CAR, que fue la única real y significativa aportante del Fondo Cuenta** que permitió la construcción de la Planta de Tratamiento del Salitre, razón de la que deduce que el río muere a causa de las descargas que produce Bogotá **y de la que resulta responsable legal, la EMPRESA DE ACUEDUCTO Y ALCANTARILLADO.**

1.5.15.5.5. Respecto de las gestiones ambientales que sostiene ha desarrollado, se duele de la bastedad del territorio de su jurisdicción, como dice lo demostró en la presentación del pacto y, afirma que debe

atender un espacio mucho más amplio que el de la cuenca del Río Bogotá por lo que sus esfuerzos deben repartirse en un amplio espectro que presenta problemáticas ambientales complejas, que exigen, al igual que lo reclama la cuenca del Río Bogotá, urgentes medidas y anota que la explicación de la concentración de la inversión de recursos que hace en ésta, la realiza en razón a la destinación del porcentaje ambiental del predial que recibe por disposición del parágrafo 2° del artículo 44 de la Ley 99 de 1993.

1.5.15.5.6. Resalta que es claro dentro del expediente, que Bogotá no ha dirigido hacia saneamiento básico la totalidad de los recursos que recibe por Ley 715, ni ha reflejado la inversión en las tarifas de alcantarillado, pudiéndolo hacer. Advierte que estas dos conductas entran dentro de la autonomía administrativa propia de las entidades territoriales, pero la decisión de políticas genera responsabilidades que apuntan a que Bogotá y sus entidades descentralizadas son las que deben prestar el servicio de alcantarillado y sean las primeras llamadas a responder por el grado de deterioro que han causado en el Río Bogotá.

1.5.15.5.7. Anota que la CAR en las mesas de trabajo como en la presentación de los pactos, **fue siempre incisiva** en que es al DISTRITO y a la EMPRESA DE ACUEDUCTO Y ALCANTARILLADO DE BOGOTÁ a quienes les corresponde la cuota más alta de responsabilidad sobre la contaminación del río y serán una y otra, a quienes en la sentencia les debe ser adjudicada la mayor carga en el esfuerzo conjunto de su recuperación. Culmina insistiendo en que las inversiones de la CAR, para el beneficio del río, no se reducen a la cuenca media, tal como quedó patente en las mesas de trabajo, como quiera que ha atendido y atiende innumerables proyectos que influyen positivamente sobre el mismo.

1.5.15.5.8. Indica que no puede omitir hacer mención al Proyecto Checua y a los programas de producción más limpia, como también sobre el trabajo que ha realizado respecto de los mataderos y sobre la recuperación de páramos; lo que demuestra que no solo adelanta acciones de remediación, sino acciones preventivas, es decir no solo atiende el agua servida y apoya con la infraestructura propia de las plantas de tratamiento para la recuperación del río, sino que invierte en la conservación del recurso, preservando los páramos, **contrarrestando la erosión** y adelantando programas de educación tendientes a crear conciencia ciudadana sobre la importancia del recurso.

1.5.15.5.9. Puntualiza que las funciones que le corresponde desarrollar tienen una arista amarga, la de policía administrativa y las acciones de uso de la coerción a favor del recurso se representan en las medidas que se han tomado contra las empresas privadas con el propósito de controlar sus vertimientos y lograr para que se disciplinen en sus procesos productivos **bajo el principio del desarrollo sostenible**. Señala que dentro del expediente obran los planes de manejo de muchas empresas privadas, instigados, orientados y vigilados en su cumplimiento por la CAR, así, todas las empresas privadas vinculadas al proceso, en su momento fueron requeridas por la autoridad ambiental, logrando que en la actualidad **todas ellas** hayan ejecutado obras destinadas a adecuar sus instalaciones a las normas ambientales existentes.

1.5.15.5.10. Remata diciendo que ha aplicado los correctivos del caso y los efectos de su intervención son visibles, pero las acciones privadas aunque corregidas por la intervención de la corporación, produjeron un daño objetivo imputable a sus causantes directos. Así mismo, señala que ha efectuado **acciones en el control ambiental de la producción minera; las areneras y canteras, las que han sido objeto de su intervención** en procura de asegurar que donde está permitido se empleen medios extractivos ecológicos.

1.5.15.5.11. De otra parte, advierte que es necesario hacer mención al tema de las curtiembres de Villapinzón, Chocontá y Cogua donde **se puede comprobar la problemática ambiental por curtiembres que han invadido la ronda del río de una comunidad que vive en condiciones que se consideran por debajo de la línea de la dignidad humana.** Al respecto, anota que **ha hecho presencia para lograr conmovier a la comunidad refractaria al problema, mediante medidas policivas que requirieron acciones de tipo penal y así lograda la recepción de la comunidad, se implementaron programas instructivos de producción más limpia.**

1.5.15.5.12. Señala que para que el cierre de curtiembres no se convierta en un problema de tipo social, el Gobierno Nacional, a instancias de la gestión administrativa de la CAR, ha propuesto subsidios para vivienda y accesos para pequeña y mediana industria para las familias realmente afectadas pues es claro que no todos los afectados representan sectores sociales vulnerables, sino que en su mayoría son industriales renuentes al cumplimiento de la normativa ambiental por cuanto vierten sus residuos líquidos altamente contaminantes sin efectuar ningún tratamiento de los mismos, vulnerando así los derechos colectivos de los usuarios de las aguas abajo de la corriente del Río Bogotá y causando graves perjuicios económicos a la propia CAR, lo cual estropea sus esfuerzos, razón por la cual también ha adoptado medidas preventivas y sancionatorias.

1.5.15.5.13. Indica que el cierre está siendo ejecutado sobre las curtiembres ubicadas en la ronda del Río Bogotá, que realizan sus vertimientos sin ningún tipo de tratamiento, contaminando con cromo, sulfuro, materia orgánica y sólidos, invasión de la ronda del río que unido a la cantidad de contaminantes que han venido arrojando, **se convierten en violaciones flagrantes que colocan en grave riesgo, no**

**solo a quienes utilizan las aguas sino a las propias familias de los curtidores de cuero.**

1.5.15.5.14. Por último, indica que en cumplimiento de su papel de autoridad ambiental, ha iniciado el cierre de los mataderos municipales (Planta de Beneficio y Faenado), que no cumplen con las normas ambientales y que vierten sus residuos sobre las aguas del Río Bogotá.

1.5.15.5.15. En conclusión la CAR señala:

- Que ha actuado como autoridad ambiental, requiriendo, sancionando y logrando adaptar la empresa privada a las normas ambientales vigentes y por lo tanto no existe omisión que la responsabilice.
- Que ha actuado respecto de la problemática propia del embalse del Muña y como autoridad ambiental no solo ha trabajado con la empresa privada, sino que igualmente ha iniciado el trámite administrativo contenido en el expediente 5297, donde ha exigido a EMGESA el cumplimiento de las obras propuestas, como el secado de las colas de los diques para alejar al municipio del Embalse, la siembra de la cerca viva que logre mitigar el efecto de olores en el municipio, la instalación de las lámparas contra los vectores, las fumigaciones periódicas, la recolección periódica de buchón, etc.
- Desde 1999 la corporación ha venido asumiendo los gastos de operación y mantenimiento de las Plantas de Tratamiento, propios del saneamiento básico, que por ley, deben ser sufragados por los municipios.

- Que no obstante la grave influencia de los vertimientos de la ciudad de Bogotá al Río Bogotá y pesar de que la jurisdicción CAR se extiende a un vasto territorio comprendido en el Departamento de Cundinamarca; **por disposición legal**, la CAR invierte el 50% del producto correspondiente del recaudo del porcentaje del impuesto predial apoyando proyectos de gestión ambiental dentro del perímetro urbano del Distrito Capital y con el fin de dar cumplimiento a ese mandato legal, en su momento, la CAR y el Distrito firmaron el convenio Interadministrativo 250 de 1997 conforme al cual los dineros de la CAR correspondientes a la sobretasa al impuesto predial que debían ser ejecutados dentro del perímetro urbano en gestión ambiental, se dirigieron a apoyar la financiación de los gastos de inversión en la ejecución del objeto contractual de la concesión 015 de 1994, suscrita por el Distrito, hoy en liquidación. Resalta que el Distrito no ha servido las obligaciones del FONDO CUENTA que debía de haber honrado, lo que generó una sobrecarga para la CAR a cuyo cargo ha estado gran parte del soporte de dicho fondo, salvo cuando el Distrito tomó la decisión de terminación unilateral del contrato de concesión, por lo que la descompensación y desatención de sus obligaciones aumentan su nivel de responsabilidad respecto del río.
- Que de lo anterior se desprenden dos efectos: En primer lugar, el 50% del producto correspondiente al recaudo del porcentaje del impuesto predial, propiedad de la CAR, ha estado dedicado al proyecto de saneamiento del Río Bogotá, de donde se explica que la gran aportante al proyecto de construcción de la Planta del Salitre, ha sido la CAR. En segundo lugar, que **los aportes hechos por mandato expreso del parágrafo 2° del artículo 44**

de la Ley 99 de 1993, sólo podían destinarse a cubrir la inversión que demandase el proyecto.

- Que el acto unilateral del Distrito Capital de terminar el contrato de concesión 015, genera que los dineros propiedad de la CAR antes comprometidos por el convenio interadministrativo 250, quedan en libertad. Por esto la CAR considera que los mismos deben ser invertidos en actividades propias de la gestión ambiental dentro del perímetro urbano, **pero de ninguna manera en actividades que son responsabilidad del Distrito**, a través de sus agencias (Empresa de Acueducto y Alcantarillado de Bogotá), relacionadas con el saneamiento básico como el tratamiento de las aguas servidas por el sistema de alcantarillado del Distrito, antes de su vertimiento en la corriente del Río Bogotá.
- A nivel municipal, la inadecuación de las redes impide un funcionamiento pleno de las plantas y, a pesar de su existencia, éstas no tratan el 100% de las aguas residuales, con lo cual los beneficios ambientales quedan en entredicho. La CAR ha dejado de ser una entidad de fomento para convertirse en autoridad ambiental.

1.5.15.5.16. De otra parte, señala que la corporación ha participado como sujeto activo respecto de la descontaminación del Río Bogotá, **incluso traslimitando (sic) sus funciones de autoridad ambiental, convirtiéndose en parte activa y solitaria en su lucha para que las empresas privadas y los municipios acepten y ejecuten sus actividades de adaptación y cumplimiento de sus planes de saneamiento básico**, agrega que de acuerdo con el artículo 9° de la Ley 472 de 1998, las acciones populares proceden contra toda actuación u

omisión de las autoridades públicas o de los particulares, que hayan violado o amenacen violar los derechos e intereses colectivos, por lo que **es necesario identificar correctamente los sujetos que causan la afectación de dichos derechos e intereses, pues el objeto esencial de la intervención judicial para la protección de los mismos se concreta en una orden tendiente a evitar el daño contingente, a hacer cesar el peligro, la amenaza, vulneración o agravio de los derechos colectivos o a restituir las cosas a su estado anterior cuando fuere posible.**

1.5.15.5.17. Finalmente, solicita que se tenga en cuenta **que la diferencia de la solución ambiental (tres plantas) respecto a la de alcantarillado (dos plantas) genera más incertidumbre respecto a la solución o problemática generada por vertimientos de Bogotá y,** además, que la solución presentada por Bogotá es incierta en sus condiciones técnicas y financieras, no están evaluados los beneficios ambientales que reporta y por el contrario existen dudas que se extienden hasta una posible lluvia ácida ocasionada por un vertimiento puntual en mayores concentraciones que las que ofrecen los vertimientos difusos y dispersos que se presentan hoy en día y por el encajonamiento que sufre el río a la altura del Salto del Tequendama y las condiciones climáticas que allí se presentan. Expresa que por parte del Distrito Capital no ha precisado sobre las siguientes obras a emprender:

- Cuál ha de ser la caracterización a nivel diseño, ingeniería y costos de la Planta de Canoas.
- No existe en el expediente una sola prueba que determine **con grado de certeza** los siguientes aspectos sobre el dragado del río: Profundidad, impacto en las compuertas de Alicachín, remoción y disposición, e impacto que genera en el medio ambiente la remoción de lodos.

- No existe claridad sobre el efecto que una descarga puntual de vertimientos, hoy difusa, genera en el medio ambiente y sobre la salubridad pública, como tampoco la que se causa tras la conexión de la red de alcantarillado del municipio de Soacha.
- No hay plan de contingencia que permita conocer cómo se van a realizar los mantenimientos en los interceptores y cómo se van a resolver los problemas de salud y ambientales en caso de colapso de la estructura de un interceptor.
- El problema de la contaminación del río es generado por Bogotá y **la solución de la PTAR CANOAS saca el problema de su perímetro para convertirlo en problema de la CAR en cuanto su vertimiento se haría en territorio de su competencia, de la que no conoce la caracterización del efluente, si va a tener tratamiento químicamente asistido, según la recomendación de la Universidad de los Andes, o si hará tratamiento terciario, siendo inciertas las ventajas ambientales, por lo cual no apoya soluciones ambientales cuyo ingrediente soporten un grado de indefinición e incertidumbre, siendo necesario el aporte de unos estudios técnicos “**que deben ser sometidos a contradicción probatoria, a la discusión académica y a la solución científica**”.**
- No es claro cuál va ser la función del MUÑA. Las soluciones planteadas la convierten en una extensión del sistema de tratamiento con lo cual se sobrecarga al municipio de Sibaté con una responsabilidad que es del Distrito y del municipio de Soacha, a tiempo que se pierde la naturaleza del embalse **PARA CONVERTIRLO EN UNA LAGUNA DE OXIDACIÓN**.

1.5.15.5.18. Para rematar su dolor respecto de la contaminación del río por parte de las personas privadas, como por la falta de voluntad de las demás autoridades, de la que insistentemente ha señalado no es su responsable como quiera que en forma solitaria es la única que ha hecho aportes con tal propósito, termina diciendo que considera que se configura la COSA JUZGADA POR EL FALLO DE 16 DE SEPTIEMBRE DE 1997 EMANADO DEL JUZGADO 2º CIVIL DEL CIRCUITO DE BOGOTÁ, QUE FUE CONFIRMADO EN SENTENCIA DE 3 DE SEPTIEMBRE DE 2002 POR LA SALA DE DECISIÓN CIVIL DEL TRIBUNAL SUPERIOR DE BOGOTÁ Y RECONFIRMADO POR LA SALA DE DECISIÓN CIVIL DE LA CORTE SUPREMA DE JUSTICIA (sic) EN EL DE 28 DE ENERO DE 2003 CONTRA LA EMPRESA DE ENERGÍA ELÉCTRICA.

1.5.15.6. ALEGATOS DE LA EMPRESA DE ACUEDUCTO Y ALCANTARILLADO DE BOGOTÁ. De igual manera, la Sala estima necesario señalar sobre unos aspectos muy puntuales aducidos por la EAAB en su escrito de alegatos de conclusión (la que en últimas pide que se desestimen las pretensiones porque está cumpliendo con sus funciones dentro del marco de la legalidad y en cumplimiento de sus deberes no puede ser el objeto de una acción popular que equívocamente la señala como responsable de la violación a los intereses y derechos colectivos que no propició por acción o por omisión), como lo son: 1) Que se apruebe el proyecto de pacto que presentó y en lo que no ha sido materia del mismo en la medida en que por ser una etapa de largo plazo no se han definido los recursos para su financiación y que son un componente de la denominada “SOLUCIÓN TÉCNICA INTEGRAL”, se tengan en cuenta los criterios trazados por el Consejo de Estado en sentencia de 5 de junio de 2001 mediante la cual se decidió la Acción Popular No. 0305-01, de la cual transcribe un aparte sobre la concurrencia de responsabilidades. 2) Que se tenga en cuenta el crecimiento desbordado de la ciudad de Bogotá por la inmigración, al

que se hizo referencia en la presentación de su pacto de cumplimiento respecto al número de habitantes que tenía en el año de 1964 -1.697.311- en relación con los del año 2003 - 6.865.977, de lo cual no es responsable la EAAB, pues es la capital de todos los colombianos, siendo el Plan de Obras de la empresa muy completo y asciende a cuatro billones de pesos.

3) Resalta que las plantas de tratamiento de aguas residuales sin un sistema completo de redes de alcantarillado, de nada sirven para el saneamiento del río como quedó demostrado en las mesas de trabajo; por lo que, continúa, los esfuerzos económicos de la EAAB apuntan precisamente hacia esa dirección, punto en el que es oportuno recordar que dentro de la estructura tarifaria no existe un componente para la construcción de las mencionadas plantas, en cuanto ya es suficiente la que la ciudadanía tiene que soportar como para que deban asumir este alto costo. 4) Solicita se designe el comité de verificación del cumplimiento de la sentencia, previsto en el artículo 34 de la Ley 472 de 1998.

Tras plantear el siguiente interrogante: ¿Cómo y en qué medida deben asumir esta carga el resto de entidades demandadas dentro de este proceso? y de responder que es algo que la sabiduría del Honorable Tribunal podrá determinar, culmina recordando el siguiente principio del Digesto I, 11,1:; ‘**suum cuique tribuere**’.

## **1.6. DE LAS RESPUESTAS DE LOS DEMAS ENTES DEMANDADOS DENTRO DE LA ACCION POPULAR ACUMULADA 479.**

### **1.6.1. RESPUESTA DE EMGESA (Fls. 491 A 523, C.1)**

Con similares argumentos a los expuestos por la E.E.E.B, responde que no realiza vertimiento alguno al EMBALSE DEL MUÑA, sino que se

trata de un trasvase de las aguas del RÍO BOGOTÁ, con el propósito exclusivo de usarlas en el proceso de generación de energía eléctrica en sus centrales y aduce que **lo que determina que haya impactos ambientales en la zona de influencia es la calidad del agua**, cuyo deterioro tiene como causa los vertimientos directos de aguas residuales de Bogotá y Soacha, como también por el impacto que recibe el río a la altura del corredor de Villapinzón-Chocontá, donde recibe las aguas residuales producto del proceso de curtiembre de más de 160 tenerías, más adelante las descargas del Río Negro y de algunas industrias que no disponen de sistema de tratamiento y después de atravesar el Distrito Capital, su proceso de deterioro se incrementa con las descargas de los ríos Juan Amarillo o Salitre, Fucha y Tunjuelo. Finalmente, agrega, después de recorrer 80 kilómetros llega en iguales condiciones de contaminación al Puente Canoas (Alicachín), donde, el río es trasvasado parcialmente al Embalse del Muña.

Como excepciones de mérito propone las que denomina como: USO APROPIADO Y CONTROLADO DE LAS AGUAS DEL RÍO BOGOTÁ, CUMPLIMIENTO Estricto DE LAS DISPOSICIONES LEGALES APLICABLES, MANEJO TÉCNICO DE LOS IMPACTOS AMBIENTALES, INEXISTENCIA DE EVIDENCIA CIENTÍFICA DE DAÑO AMBIENTAL POR PARTE DE LOS DEMANDANTES Y CADUCIDAD, a cuyos argumentos se referirá la Sala en la parte considerativa de este fallo para resolverlas.

Como pruebas, aporta las documentales que se relacionan en el aparte correspondiente, no sin antes solicitar la práctica de unos testimonios e inspección judicial al embalse del Muña con el fin de que se constatará las obras actualmente ejecutadas por esa entidad, como lo es el cerramiento perimetral del mismo.

## 1.6.2. RESPUESTAS DE LOS MUNICIPIOS Y DEL DISTRITO CAPITAL.

### 1.6.2.1. Municipio de Sibaté (fls. 432 a 434, c.1):

Sobre los hechos, responde que son ciertos los referidos en el escrito de demanda del 1 al 4, que no lo son el 5, 7, 8 y 9, parcialmente cierto el 6, del que señala que EMGESA ha desarrollado obras de mitigación del impacto ambiental en cumplimiento de un fallo de tutela y coordinación directa con la CAR. Igualmente, expresa que el Municipio de Sibaté adelanta contratación y desarrollo de plantas de tratamiento de aguas residuales, tanto de la población como del matadero municipal. Del hecho 9 menciona que no es cierto que el señor GUSTAVO MOYA ÁNGEL sea residente de esa localidad, como tampoco lo ha sido en los últimos 10 años, tal y como se puede constatar en el respectivo registro, fuera de que la nomenclatura que se indica como dirección no existe allí.

Con respecto a las pretensiones, manifiesta que se opone porque, de un lado al municipio ya se le estaba adelantando la Acción Popular en este tribunal en el proceso radicado con el No. 00-0122 ante el despacho del Magistrado CARLOS ENRIQUE MORENO RUBIO, del cual solicitó su acumulación para un mejor proveer y, de otro lado, por cuanto las pretensiones, aduce: *“no tienen conducencia con mi mandante ni tienen nada que ver”*.

### 1.6.2.2. Municipio de Chía (fls. 527 a 548, c.1):

Después de responder a los hechos de la demanda, de los que admite unos y dice no constarle otros, propone como excepciones las de ERRADO RUMBO PROCESAL DE LA ACCIÓN, en consideración a tres hechos significativos: 1) Involucración (sic) como parte pasiva al Municipio de Chía, siendo ajeno a la acción; 2) Desenfoque palmario de

las obligaciones a cargo de la CAR y de la E.E.E.B; 3) Inestipulación (sic) de la responsabilidad solidaria de la E.E.E.B, CAR y Ministerio del Medio Ambiente y Municipio de Sibaté. Todo lo cual tiene como pilar fundamental el que los hechos no le son imputables al municipio, si quiera por extensión, en cuanto afirma que las aguas servidas y/o tratadas se represan en la Laguna del Muña después de haber sido notoriamente contaminadas por las industrias y demás usuarios del Distrito Capital. De otra parte, con respecto a la laguna de oxidación con que cuenta esa localidad, da cuenta que se encuentra a cargo de la Corporación Regional de Cundinamarca (Almeidas), razones que la llevan a proponer la excepción de ILEGITIMIDAD POR PASIVA DEL MUNICIPIO DE CHÍA.

A continuación realiza un amplio recuento de las funciones que de acuerdo con el artículo 5° de la Ley 99 de 1993, le competen al MINISTERIO DEL MEDIO AMBIENTE, como al CONSEJO NACIONAL AMBIENTAL según el artículo 14 ibídem, como también a las CORPORACIONES AUTÓNOMAS REGIONALES, descritas en los artículos 23, 30 y 31 de la misma ley, y menciona que para el caso ésta ha recibido renta de la EMPRESA DE ACUEDUCTO DE BOGOTÁ por la utilización del recurso hídrico según la permisión de los artículos 42 y 43 idém, como también la reciben los municipios por concepto de los que éstos recaudan por Impuesto Predial, a la vez que también percibe las transferencias del sector eléctrico de que trata el artículo 45 in-fine, las que también recibe el MUNICIPIO DE SIBATÉ por efecto de lo prescrito en el numeral 2° de la referida norma.

Remata diciendo que la contaminación de la Represa del Muña no es una problemática local, porque es claro que el DEPARTAMENTO DE CUNDINAMARCA pudo haber intervenido de manera efectiva y anterior, con fundamento en lo dispuesto en el artículo 64 de la citada ley, el cual transcribe.

**1.6.2.3. Municipio de Funza** (fls. 571 y 572, c.1):

Asevera que no es en ningún momento el causante de la contaminación de que es objeto el RIO BOGOTÁ, por que éste desde su nacimiento y de manera especial a partir del MUNICIPIO DE VILLAPINZÓN inicia su vertiginosa profanación, la que se agrava dentro del recorrido de su cause y al llegar a esa localidad **no se trata ya de un río sino simplemente de una de las cloacas más contaminadas del universo**, por lo que, culmina diciendo, no sólo el MUNICIPIO DE SIBATÉ esta siendo afectado, sino todos los ribereños, razón por la cual **expresa que “alaba la decisión de la magistrada sustanciadora de vincular a todos los que de manera directa o indirecta reciben graves perjuicios que se ven reflejados en el ecosistema”** y, por consiguiente, en la calidad de vida de sus habitantes, por todo lo cual, manifiesta, coadyuva la petición de descontaminación no solo de la LAGUNA DEL MUÑA, sino también de todo el recorrido de dicha corriente hídrica y a partir de su nacimiento, obligando a todas las entidades particulares como oficiales, del orden nacional, departamental, municipal y distrital para que cesen sus actos perturbatorios.

**1.6.2.4. Municipio de Sopó** (fls. 578 a 586, c.1)

Comienza el apoderado de ese ente, por mostrar su inconformidad con respecto a la vinculación de su poderdante, por cuanto, de una parte, expresa que la demanda se funda en hechos y normas disímiles a las del procedimiento establecido en la Ley 472 de 1998, y, de otra, alega que le es imposible desvirtuar las pretensiones porque no tienen conducencia con el municipio que representa, ni tienen nada que ver con el EMBALSE DEL MUÑA, habida cuenta que el actor no lo demandó, por lo que estima que debe oponerse a su prosperidad. Con esas razones, propone la excepción de mérito de FALTA DE LEGITIMACIÓN EN

LA CAUSA POR PASIVA, bajo el principio de la legalidad de la actuación pública, según el cual a los servidores públicos sólo le es dado realizar los actos previstos en la Constitución, la Ley, o los reglamentos, por lo que, remata, no pueden improvisar funciones ajenas a su competencia ni asumir responsabilidades.

Interpone, igualmente, la excepción perentoria de PRESCRIPCIÓN DE LA ACCIÓN, teniendo en cuenta que han transcurrido más de 20 años de haberse presentado los hechos relacionados con el vertimiento y almacenamiento de las aguas del RÍO BOGOTÁ, en cuanto se trata de acción fundamentada en el artículo 1005 del Código Civil que pretende la indemnización de un daño sufrido, por lo que al cabo de un año de haberse recibido prescribió a tenor del 1007 Idém.

Así mismo, incoa la de INEXISTENCIA DE LA OBLIGACIÓN A CARGO DEL MUNICIPIO DE SOPÓ, por que a su entender es la CORPORACIÓN AUTÓNOMA REGIONAL DE LAS CUENCAS DE LOS RÍOS BOGOTÁ, UBATÉ Y SUÁREZ “CAR”, la entidad a la cual le están atribuidas las funciones para la realización de las obras que pretende el accionante, según lo previsto en los literales d, e y f del artículo 4º de la Ley 3 de 1961 que la creó, fuera de que, resalta, siendo la autoridad ambiental - de acuerdo con lo prescrito en la Ley 99 de 1993- es a quien le compete el manejo ambiental y la ejecución de una estrategia integral de saneamiento de la cuenca del RÍO BOGOTÁ.

Finalmente, invoca como medio de defensa el MANEJO TÉCNICO Y REGULADO POR PARTE DEL MUNICIPIO DE SOPÓ DE LOS IMPACTOS AMBIENTALES SOBRE LAS AGUAS, en consideración a que los vertimientos de sus aguas residuales los hace en tres sitios puntuales del RÍO TEUSACÁ, en los sitios denominados Tres Esquinas, Pueblo Viejo, y Briceño, y en cada uno de ellos se encuentra una planta de tratamiento con sistema anaeróbico, mantenidas por la Empresa de

Servicios Públicos de Sopó “EMSERSOPO”, con el seguimiento de rigor por la CAR, y por virtud del Convenio Interinstitucional No. 147 de 13 de agosto de 1991, por lo que, anota, como resultado eficaz de las plantas y con la información técnica disponible, dicha autoridad le determinó un valor mínimo a pagar por Tasa Ambiental por la vigencia de 2002, tasa que reglamenta el Decreto 901 de 1997 y que tiene como objetivo la reducción de la contaminación hídrica.

Menciona que no puede deducírsele responsabilidad al municipio porque el RÍO BOGOTÁ ingresa a esa localidad aguas abajo de la Planta de Tibitoc, discurriendo su cauce por áreas de topografía plana, en tanto que, resalta, el RÍO TEUSACÁ como las quebradas y demás riachuelos afluentes del primero, que irrigan por su localidad, desembocan también aguas abajo de la mencionada planta.

#### **1.6.2.5. Municipio de Chocontá (fls. 605 a 608, c.1).**

Con similares razones expuestas por los anteriores demandados, se opone a las pretensiones en cuanto afirma que no tiene ninguna injerencia en el manejo y operación del EMBALSE DEL MUÑA, lo cual lo lleva a proponer la excepción de INEXISTENCIA DE LA OBLIGACIÓN EN CABEZA DEL MUNICIPIO y, agrega que la recuperación de las condiciones ambientales recae principalmente en la EMPRESA DE ENERGÍA ELÉCTRICA DE BOGOTÁ (por ser la propietaria del embalse), como también en el DISTRITO CAPITAL DE BOGOTÁ (que es la principal fuente de contaminación del río Bogotá con el vertimiento de sus aguas negras), EL MINISTERIO DEL MEDIO AMBIENTE, LA CAR DE CUNDINAMARCA (por que de acuerdo con la Ley 99 de 1993 le corresponde promover acciones más decididas para controlar el problema ambiental a través de los diferentes instrumentos que la ley establece), EL DEPARTAMENTO

ADMINISTRATIVO DE PLANEACIÓN NACIONAL, LA GOBERNACIÓN DE CUNDINAMARCA y LA EMPRESA DE ACUEDUCTO Y ALCANTARILLADO DE BOGOTÁ, razones que la llevan a excepcionar y radicar la RESPONSABILIDAD EN LA RECUPERACIÓN DEL EMBALSE DEL MUÑA EN CABEZA DE TERCEROS.

**1.6.2.6. Municipio de Soacha** (fls. 636 a 637, c.1)

Incoa la excepción de INEXISTENCIA DE LA OBLIGACIÓN, por cuanto afirma que no es el Municipio de Soacha quien realiza el almacenamiento y vertimiento de aguas negras al EMBALSE DEL MUÑA.

No obstante, expresa que el señor alcalde viene actuando de manera efectiva en lo que tiene que ver con la problemática del RÍO BOGOTÁ, por lo que dentro del Plan de Ordenamiento Territorial (Acuerdo 046 de 2000) se proyectó una planta de tratamiento de aguas residuales y se dispuso un área en el sector rural Vereda Canoas, lo mismo que dentro del Plan de Desarrollo 2001-2003 (Acuerdo No. 13 de 31 de mayo de 2001) dentro del capítulo III, artículo 47 MANEJO, PROTECCIÓN Y RECUPERACIÓN DE LOS RECURSOS NATURALES Y EL AMBIENTE, se proponen cuatro estrategias consistentes en el fortalecimiento, reglamentación, gestión e investigación, con el objeto de lograr un verdadero equilibrio ecológico y, en el artículo 51 se propuso como proyectos la recuperación de humedales, en los artículos 52 y 53 se prevén programas de educación, de manejo de basuras, de uso racional de los recursos naturales, de protección al medio ambiente, entre otros.

#### **1.6.2.7. Municipio de Villapinzón (fls. 658 a 660, c.1)**

Se opone a los pedimentos en cuanto afirma que ha de estarse a lo que se pruebe en relación con las empresas o entidades que pudieren ser responsables del deterioro ambiental.

Así mismo, precisa que el municipio que representa se encuentra comprometido de acuerdo al Plan de Desarrollo, Esquema de Ordenamiento Territorial y Presupuesto del año 2002, en el desarrollo de planes, programas y proyectos con el fin de evitar y restablecer eventuales daños ecológicos y ambientales, en especial con el RÍO FUNZA y lo que corresponde a la cuenca alta y sus afluentes, por lo que sostiene que no puede imputársele omisión alguna o grado de responsabilidad por la contaminación ambiental de la región afectada.

Es así, como describe que se han venido adelantando proyectos encaminados a la recuperación del RÍO BOGOTÁ, entre los cuales enuncia los siguientes:

- El proyecto de ordenamiento del área del Distrito de manejo integrado por la provincia Las Almeydas.
- Proyecto caracterización y valoración del recurso hídrico.
- Proyecto de identificación y caracterización de la diversidad biótica municipal y su contribución al desarrollo.
- Programa integral para el manejo de las rondas del río Bogotá y la Quebrada Quincha.
- Estudios de riesgo y mitigación para el río Bogotá y la quebrada Quincha.
- Estudio geotécnico en la carrera quinta colindante con el río Bogotá y,

- **Proyecto piloto para el manejo alternativo de aguas residuales de curtiembres** (la negrilla es de la Sala).

Con relación al Esquema de Ordenamiento Territorial, –cuya copia adjunta en el documento 5-, asevera que el mismo contempla para el Componente Urbano, entre otros, los usos de protección ambiental, conservación y reforestación de rondas hídricas, tratamiento de saneamiento ambiental, cuatro programas que deben ser desarrollados a corto plazo para el tratamiento de los vertimientos de aguas residuales.

Refiere que en el POT igualmente desarrolla el componente rural como el urbano y a través de su contenido se detallan las estrategias y políticas a implementar, mediante programas y proyectos donde se condensa el principio de sostenibilidad ambiental. Para tal efecto, ejemplifica que en lo atinente con la política de protección del agua se resalta el programa de protección de los ecosistemas estratégicos, con proyectos como el de la Adquisición de Predios del Río Bogotá entre otros.

Son los anteriores argumentos, culmina, los que dan cuenta que **el Municipio de Villapinzón ha sido diligente en la mitigación del impacto ambiental.**

#### **1.6.2.8. Municipio de Madrid** (fls. 661 a 668, c.1),

Responde que no se encuentra ubicado en la rivera del RÍO BOGOTÁ, por lo cual no debió notificársele la demanda para conformar el contradictorio, lo cual lo determina a oponerse a las pretensiones y a pedir su integración con las entidades que conforman el SINA, entre otras el MINISTERIO DEL MEDIO AMBIENTE y EL SEÑOR PRESIDENTE DE LA REPÚBLICA, quienes, refiere, son los encargados de coordinar la política frente a la conservación del medio ambiente, según la Ley 99 de 1993.

Como pruebas, entre otras, acompaña un oficio remitido por la CAR mediante el cual le fija la tarifa por Tasa Ambiental según la carga contaminante del municipio, que arriba a 1.478,85 kg/día de DBO5 y 1478,85 kg/día de SST (fls. 676 a 678, c.1).

**1.6.2.9. Municipio de Facatativá** (fls. 682 a 684, c.1)

Exige ser resarcido por la EMPRESA DE ENERGÍA ELÉCTRICA DE BOGOTÁ, que, afirma, en forma grave ha dañado el medio ambiente y los elementos del espacio público en el municipio, especialmente el oxígeno en los sectores de Santa Marta, por los vertimientos y depósito de aguas negras sobre el EMBALSE DEL MUÑA, lo cual afecta la salud de los habitantes de los municipios aledaños como lo es Facatativá.

Expresa que la CAR en el oficio 475076 indica que el municipio no tiene incidencia en la responsabilidad por la operación del mencionado embalse.

**1.6.2.10. Municipio de Zipaquirá** (fls. 690 a 694, c.1)

Aduce que las fuentes hídricas de que se alimenta, la constituyen el RÍO SUBACHOQUE, el cual desemboca en el RÍO BALSILLAS a la altura de la LAGUNA LA HERRERA en el municipio de BOJACÁ, previo tratamiento de sus aguas en la laguna de oxidación construida por la CAR a la altura de la hacienda Casablanca.

**Le achaca la responsabilidad para la descontaminación del RÍO BOGOTÁ al Congreso de la República, al Ejecutivo, a las autoridades ambientales y, en general a todos los habitantes del territorio por donde pasa,** por lo que anota que es preciso que exista una concertación clara de la CAR con los municipios de la Sabana, en

especial con el DISTRITO CAPITAL para que se defina un programa para el tratamiento de aguas servidas.

Da cuenta que radicó ante FINDETER un proyecto cuyo objeto es conseguir recursos para el diseño, construcción y puesta en marcha de una planta de tratamiento de sus residuos sólidos, los que, dice, en la actualidad van directamente al RÍO SUBACHOQUE, del que menciona que se está contaminando, y pone de presente que el Consejo de Estado en sentencia al resolver la apelación dentro de la Acción Popular 298-01 le otorgó un plazo de un (1) año para la construcción de la mentada planta.

Por último, refiere los proyectos para la recuperación, reforestación y limpieza del RÍO SUBACHOQUE, con la colaboración de la CAR, el financiamiento de FINDETER y el FONDO DE REGALÍAS donde se radicó uno para la reforestación y cerca de dicha fuente hídrica, del cual para esa fecha no se la habían asignado los recursos (fls. 664 a 667, c.1)

#### **1.6.2.11. Municipio de Mosquera** (fls. 699, c.1)

Se opone a las pretensiones en cuanto afirma que son ajenas al municipio, por que no tiene el menor nexo con los hechos de la demanda, que se relacionan con el EMBALSE DEL MUÑA, formado por las aguas de uso público de los ríos MUÑA y AGUAS CLARAS.

De igual manera, aduce que es grave el bombeo de las aguas contaminadas del RÍO BOGOTÁ al referido embalse, pero el municipio nada tiene que ver con esa situación.

Por todo lo anterior, fulmina diciendo el señor apoderado de ese municipio, que le *“parece improcedente que dicha acción se plantee contra municipios como el que en la actualidad estoy representando, de igual manera*

*pienso que endilgar responsabilidad a este ente Jurídico sería retroceder muchos siglos en la teoría de la responsabilidad, toda vez que no hay mediatez entre la causa y efecto de los hechos aquí demandados”.*

**1.6.2.12. Respuesta del Distrito Capital-Secretaría de Salud, DAMA (fls. 753 a 787, c.1).**

En escrito presentado el 2 de marzo de 2003, el Director de Asuntos Judiciales del Distrito Capital, pone de presente que de acuerdo con lo preceptuado en el artículo 35 del Decreto Ley 1421 de 1993, la representación judicial del mismo está en cabeza del Alcalde Mayor de Bogotá, quien en ejercicio de su función la delegó en dicha dirección, por lo que señala que ni la SECRETARÍAS ni los DEPARTAMENTOS ADMINISTRATIVOS tienen capacidad procesal para ser parte y comparecer al proceso, habida cuenta que no tienen personería jurídica.

Con lo anterior, invoca que el DEPARTAMENTO TÉCNICO ADMINISTRATIVO DEL MEDIO AMBIENTE “DAMA”, no ostenta personería jurídica para comparecer al proceso (fls. 718 a 729).

No sobra recabar en este aparte de la sentencia, antes de adentrarse la Sala en las consideraciones, que son esas mismas razones, las que la llevan a aclarar que aun cuando la SECRETARÍA DE SALUD DEL DISTRITO CAPITAL como también las demás dependencias del mismo y de los municipios, no tienen capacidad procesal, sus diferentes pronunciamientos en torno al debate que plantea la contienda deben ser tenidos en cuenta, por cuanto el origen de la violación a los derechos colectivos en las Acciones Populares, al igual que a los derechos individuales en las Acciones de Tutela, radica en la acción u omisión de las autoridades públicas. Así las cosas, aún cuando para los efectos procesales se tendrá como una sola parte a cada uno de los entes con capacidad procesal, es importante tener en cuenta lo que los funcionarios

que presiden las dependencias de los referidos entes han respondido sobre la imputación por la vulneración de los derechos colectivos invocados.

Pasando al tema de fondo del escrito de contestación de esta parte, básicamente responde que las pretensiones van dirigidas a la protección y recuperación del EMBALSE DEL MUÑA, territorio sobre el que no tiene competencia el Distrito Capital, por lo que nada le consta en relación con los hechos que se le atribuyen a la E.E.E.B, y con respecto a la vinculación oficiosa que hiciera el tribunal, responde que si lo que se persigue es la descontaminación del RÍO BOGOTÁ, al no indicarse ningún tipo de responsabilidad por acción u omisión en el auto que lo vincula, se está invirtiendo el régimen de responsabilidad de la Administración, por ende la carga de la prueba. Con esas razones, propone las excepciones de FALTA DE LEGITIMACIÓN EN LA CAUSA POR PASIVA, e IMPROCEDENCIA DE LA VINCULACIÓN OFICIOSA DEL DISTRITO CAPITAL, de la que dice, no cumple con los requisitos señalados en el artículo 18 de la Ley 472 de 1998, sobre la indicación de la persona natural o jurídica o la autoridad presuntamente responsable de la amenaza o agravio, por que dentro del asunto que se resuelve la parte actora no ha demandado al Distrito, pero el tribunal lo vincula oficiosamente en el entendido que le asiste alguna responsabilidad, siendo que, remata, no existe tal (fls. 779 a 786, c.1).

Sin embargo esa respuesta acerca de su disconformidad con la vinculación oficiosa que se le hiciera, pasa a pronunciarse con relación al tema de la contaminación del RÍO BOGOTÁ, señalando que de conformidad con el Acuerdo 19 de 1994 y el Decreto Distrital 673 de 8 de noviembre de 1995, es en el DAMA en quien recae la gestión ambiental, no sin antes recalcar que existe responsabilidad mancomunada de la comunidad, fuera de que, agrega, la EMPRESA DE ACUEDUCTO Y ALCANTARILLADO, en consonancia con el Acuerdo 06 de 8 de

mayo de 1990 y según el PLAN DE ORDENAMIENTO TERRITORIAL PARA SANTAFÉ DE BOGOTÁ, adoptado mediante el Decreto 619 de 28 de julio de 2000, artículo 26 parágrafo 2º, es la entidad responsable de demarcar las rondas y zonas de manejo del río, por lo que deberá velar por la preservación ambiental.

Después de aceptar las descargas de sus aguas residuales domésticas e industriales sin tratamiento alguno al CANAL DE TORCA y a los ríos FUCHA Y TUNJUELO, las cuales desembocan en el RÍO BOGOTÁ, que, afirma, *“lo convierten en la mayor alcantarilla abierta del país, por lo que resulta afectada una amplia zona del sur y suroccidente de la Sabana y de la hoya baja del río, así como un tramo considerable del río Magdalena, cuyos impactos relaciona* (fl. 757, c.1), pasa a mencionar las obras emprendidas por el Distrito Capital para la descontaminación del río, concretamente sobre el Plan Maestro de Alcantarillado y sobre el tema de la construcción de las tres plantas de tratamiento a la altura de los RÍOS SALITRE, FUCHA Y TUNJUELO, las que, menciona, cada una comprende dos fases de tratamiento: Primario y Secundario de tipo biológico, que fueron objeto de recomendaciones por los estudios adelantados por la firma EPAM en el año de 1993 y que fueron acogidas por el COMITÉ INTERINSTITUCIONAL DEL RÍO BOGOTÁ, conformado por el DEPARTAMENTO NACIONAL DE PLANEACIÓN, LA CAR, EL DEPARTAMENTO DE CUNDINAMARCA Y EL DISTRITO CAPITAL, lo que dio lugar a la licitación internacional que abrió la Alcaldía Mayor de Bogotá, la cual fue adjudicada al CONSORCIO DEGREMOT-LYONNAISE DES AUX DE FRANCIA, cuyo contrato de Concesión No. 015 se firmó el 20 de septiembre de 1994, consistente sobre la realización del diseño, construcción, suministro, instalación, operación, mantenimiento y administración de la primera etapa, esto es, de la Planta de Tratamiento de El Salitre, de la cual cuenta la historia acerca de la construcción de la obra, de la consecución de la licencia ambiental, de la cesión del contrato

a la COMPAÑÍA BOGOTANA DE AGUAS Y SANEAMIENTO-SUEZ LYONNAISE DES EAUX DEGREMONT S.A. –E.S.P. (BAS), contrato del que, menciona, se levantaron tres actas aclaratorias, como también pone de presente todo lo concerniente al sistema de tratamiento que allí se realiza o Plan de Manejo Ambiental de esa primera fase (fls. 762 a 768, c.1).

Finalmente, continúa con la gestión ambiental que realiza el DAMA sobre el control, seguimiento y monitoreo de los vertimientos industriales, así como sobre la expedición de normas y estándares ambientales, teniendo en cuenta el Decreto 1594 de 1984, que, según sostiene, obliga al usuario a implementar un sistema de tratamiento con el fin de poder establecer el porcentaje de remoción, que lo llevó a expedir la Resolución 1074 en octubre de 1997, en la que se establecen los estándares ambientales en materia de vertimientos, de la que hace una breve descripción de su texto, como también de las números 1558 de 1998, 339 de 1999 (fls. 769 a 774, c.1).

Puntualiza su esquema de señalamiento de obras en procura de la recuperación del río, refiriéndose al Programa de Participación Comunitaria para recuperar las quebradas del Distrito, para enseguida acometer el de los Registros Topográficos y Avalúos Comerciales de predios en Áreas de Interés Ambiental, como lo son la Arborización del la ronda del RÍO TUNJUELITO en Usme, el Proceso de Recuperación de Parques y Humedales, el Parque Lineal Molinos de Córdoba- Juan Amarillo-Jaboque, la recuperación del Humedal Santa María del Lago, el Plan Maestro Ronda Río Bogotá Zona Norte, los Convenios con las comunidades Aledañas a las Zonas de Humedales, y los Diseños Detallados Río Fucha- Parque Lineal Río Fucha (fls. 774 a 779).

Por su lado, la SECRETARÍA DE SALUD DE BOGOTÁ responde en los mismos términos que el DISTRITO CAPITAL acerca de su falta de

capacidad para obrar en el proceso, la cual, señala, se radica en el Alcalde Mayor y con respecto al tema básico de sus funciones, invoca el artículo 12 de la Ley 10 de 1990, el 35 del Acuerdo 1421 de 1993, el 3° del Acuerdo de 1990, señalando que controla en coordinación con la EMPRESA DE ACUEDUCTO Y ALCANTARILLADO DE BOGOTÁ, la calidad del agua para consumo humano en el Distrito Capital, la cual no se extiende a los municipios. De otra parte, con relación al aspecto ambiental aduce que es competencia del DAMA según lo prescrito en el artículo 8° del Acuerdo de 1996. Con esas razones, propone las excepciones de FALTA DE LEGITIMACIÓN EN LA CAUSA POR PASIVA y FALTA DE COMPETENCIA, aludiendo que no tiene ni jurisdicción ni competencia sobre el Embalse del Muña, como tampoco para ejercer alguna actividad en el Departamento de Cundinamarca, donde ocurren los hechos motivo de la presente acción (fls. 354 a 362, c.1).

#### 1.7. RESPUESTAS DE LAS INDUSTRIAS Y EMPRESAS

**1.7.1. Eternit Colombiana S.A. , Líquido Carbónico Colombiana S.A., Alpina S.A., Cervecería Leona S.A., Conalvidrios S.A., y Refisal S.A.** (fls. 797 a 802, 851 a 858, 977 a 985, 1.204 a 120012, respectivamente, c. principal 2)

Siendo asistidas por un mismo apoderado, este se pronunció respecto de cada una de sus poderdantes así:

Con respecto a ETERNIT COLOMBIANA S.A. señala el apoderado que no puede atribuirse a su representada conducta negligente o arbitraria en materia de contaminación del embalse del Muña, pues en la actualidad no le vierte ni le descarga aguas o desechos, además menciona que ha acatado las normas ambientales, como también los requerimientos de la CORPORACIÓN AUTÓNOMA REGIONAL DE CUNDINAMARCA, la cual corroboró que los efluentes residuales de la industria son

recirculados al proceso productivo, aunque existen ocasionales vertimientos de aguas lluvias a un vallado que descarga a la quebrada Chusacá. Además, señala que tanto la empresa que representa como otras, resultan afectadas por la contaminación de dicho embalse.

Similar pronunciamiento realiza respecto de la industria LÍQUIDO CARBÓNICO COLOMBIANA S.A.

Con relación a la industria CONALVIDRIOS S.A., afirma que no puede atribuírsele una conducta negligente o arbitraria en materia de contaminación del embalse del Muña, por que no le vierte ni le descarga aguas o desechos y ha acatado las normas y requerimientos de la Corporación Autónoma Regional de Cundinamarca. Así mismo, aduce que ha cumplido con el plan de control de vertimientos residuales domésticos y su sistema de tratamiento se encuentra en operación estable. En cuanto a REFINADORA DE SAL S.A.“REFISAL”, fuera de que invoca las mismas razones que aduce respecto de sus demás representadas, el señor apoderado indica que no puede atribuírsele conducta negligente o arbitraria en materia de contaminación del mencionado embalse, por cuanto sus instalaciones no se encuentran en sus proximidades y cualquier vertimiento que hace lo realiza a muchos kilómetros de distancia y de acuerdo con las normas jurídicas. De otra parte, señala que según el Director Regional de la Sabana Norte y Almeydas de la CAR, REFISAL no requiere de licencia ambiental, aunque debe cumplir con la normatividad y tener los permisos y concesiones respectivos.

Sobre CERVECERÍA LEONA S.A. señala que tampoco puede atribuírsele una conducta negligente o arbitraria en materia de contaminación del EMBALSE DEL MUÑA, por cuanto sus instalaciones industriales no se encuentran en sus proximidades y alega, de acuerdo con la ubicación de esta industria, que es obvio que no vierte ni descarga

aguas o desechos en el embalse, fuera de que la misma ha acatado las normas y requerimientos de la Corporación Autónoma Regional de Cundinamarca (fl. 1259 del Cuad. No. 2).

Con respecto a ALPINA PRODUCTOS ALIMENTICIOS S.A. “ALPINA”, también señala que las instalaciones de esta empresa no se encuentran en las proximidades del EMBALSE DEL MUÑA y, en consecuencia, tampoco vierte ni descarga sus aguas o sus desechos en él y agrega que en materia de vertimientos también ha acatado las normas y requerimientos de la CORPORACIÓN AUTÓNOMA REGIONAL DE CUNDINAMARCA (fl. 1320 del Cuad. No. 2). Al respecto, indica que esa entidad en el oficio DRSNA 000-4107 de 5 de diciembre de 2001 señala que se realizó una visita a las instalaciones de ALPINA Sopó, con el objeto de conocer un proyecto que tiene como objetivo el cumplimiento de la norma de vertimiento, como el completamiento del sistema de tratamiento de aguas residuales y el cumplimiento de los estándares ambientales.

De otra parte, en cuanto a los fundamentos jurídicos, el apoderado de las empresas demandadas coincide en afirmar que la contaminación del embalse del Muña no es consecuencia directa ni indirecta de acciones u omisiones de sus poderdantes sino que presuntamente provienen de la EMPRESA DE ENERGÍA DE BOGOTÁ, hoy EMGESA, razón por la cual asevera que las principales afectadas directas por la inacción estatal son sus representadas, por cuanto las autoridades del Sistema Nacional Ambiental han omitido el cumplimiento de sus deberes constitucionales y legales al permitir el deterioro creciente de la calidad ambiental y de vida de los habitantes de la Región del Muña, entre los cuales forman parte de ese grupo de afectados, las empresas ETERNIT COLOMBIANA S.A., LÍQUIDO CARBÓNICO COLOMBIANA S.A., CONALVIDRIOS REFINADORA DE SAL S.A., CERVECERÍA LEONA S.A., ALPINA S.A.

Además, señala que a la luz de la Constitución y la Ley se encuentran dos presuntos responsables de la contaminación: la EMPRESA DE ENERGÍA DE BOGOTÁ-EMGESA por el bombeo y almacenamiento de aguas negras en el embalse, y la CAR por omisión al permitir la actividad de EMGESA sin ejercer sus funciones de control y seguimiento.

Del llamamiento en garantía, aduce que no procede por cuanto de acuerdo con la Ley 472 de 1998, en este caso no existe ni legal, ni contractualmente, un vínculo que ligue a los demandados iniciales con sus poderdantes, así como tampoco existe obligación de indemnizar con fundamento en la ley o en un contrato.

Al respecto, expresa que no procede la vinculación de sus poderdantes como demandados porque los elementos que configuran la responsabilidad en materia colectiva no se presentan y no existe un nexo de causalidad que ligue la actividad de dichas empresas con la contaminación del embalse ni mucho menos con la construcción y operación del mismo para generación eléctrica utilizando aguas del Río Bogotá, por tanto, remata, no deben ser considerados como demandados en la presente acción.

Manifiesta que es importante estudiar a fondo la causa que origina la responsabilidad y frente a dicho estudio considera que existirían dos posibles hipótesis: La primera entender que la causa de la contaminación del EMBALSE DEL MUÑA es la contaminación del RÍO BOGOTÁ o que la causa de la contaminación es la actividad de EMGESA al utilizar las aguas contaminadas del Río Bogotá para procesos de generación eléctrica y la segunda, por la omisión de las autoridades ambientales frente a dicha actuación, y considera que si el Tribunal asume la primera tesis tendría que citar a todos y cada uno de los bogotanos particulares o

personas jurídicas que hacen sus vertimientos al Río Bogotá. Puntualiza, que se debería ampliar la segunda hipótesis y señalar que la causa de la contaminación es la Empresa de Energía de Bogotá - EMGESA y la omisión de las autoridades ambientales.

Bajo esos argumentos, el señor abogado propone las siguientes excepciones: - AUSENCIA DE LEGITIMIDAD ACTIVA, CONDUCTA LEGÍTIMA DE LAS DEMANDADAS, AUSENCIA DE DAÑO AMBIENTAL, AUSENCIA DE NEXO CAUSAL, RESPONSABILIDAD DE UN TERCERO, FALTA DE JURISDICCIÓN Y COMPETENCIA, de todas las industrias que apodera.

### **1.7.2. Espumados S.A.**

Señala el apoderado de esta industria, que su representada está en capacidad de afirmar y probar que no vierte al RÍO BOGOTÁ ni menos a la LAGUNA DEL MUÑA ninguna clase de aguas que pudieren afectar o contaminar el medio ambiente y que tampoco estaría en capacidad de efectuar la construcción de obras de infraestructura para atender la petición principal de la demanda. Además, indica que si la contaminación de la laguna es o ha sido responsabilidad de la EMPRESA DE ENERGÍA ELÉCTRICA DE BOGOTÁ D.C. es ella la que debe responder.

Así mismo, asegura que no hay norma que obligue a una empresa particular, ni capital privado vinculado a empresa alguna que pueda enmendar una situación de daño ecológico del RÍO BOGOTÁ y de la LAGUNA DEL MUÑA, pues sólo el Estado en cumplimiento de los fines propuestos en la Constitución, está en capacidad de hacerlo. Señala además, que la regulación del saneamiento ambiental corresponde a la Nación o a sus entes que son los obligados a mantener el bienestar

general y el mejoramiento de la calidad de vida de la población dentro de sus fines sociales.

Finaliza diciendo que ESPUMADOS S.A. vierte sus aguas al alcantarillado del Municipio de Soacha y paga por este servicio y no es su responsabilidad que dicho municipio realice actividades que puedan contaminar.

En cuanto al llamamiento en garantía aduce que no procede contra su representada por cuanto no existe ningún vínculo contractual ni legal para obligarla.

Propone las siguientes excepciones: CARENCIA DE COMPETENCIA DEL TRIBUNAL PARA MODIFICAR LA DEMANDA, INEXISTENCIA DE LAS OBLIGACIONES INCOADAS, FALTA DE LEGITIMACIÓN EN LA CAUSA POR PASIVA, AUSENCIA DE NEXO CAUSAL, PRESCRIPCIÓN.

**1.7.3. Distribuidora Tropiabastos Ltda.** (fls. 939 a 945, c. principal 2)

Asegura el apoderado de la demandada, que ésta no interviene en la contaminación por cuanto no colinda con el RÍO BOGOTÁ, el cual es el agente contaminante en discusión, así como tampoco interviene en el mantenimiento de las aguas de éste ni del EMBALSE DEL MUÑA.

Así mismo, refiere que su representada no arroja ningún tipo de desecho al lecho del río o de sus afluentes y no procesa ningún tipo de materia prima, química o productos alimenticios, toda vez que su principal y único objeto social es la comercialización y distribución al por mayor y al detal de toda clase de productos alimenticios ya procesados y de consumo en el hogar. Con base en esas razones, aduce que no existe

ningún nexo o relación de causalidad, lo cual, anota, es necesario al momento de endilgar una responsabilidad a su representada.

De otra parte, precisa que la Acción Popular instaurada se encuentra prescrita por haber transcurrido más de veinte años de haberse presentado los hechos relacionados con el vertimiento y almacenamiento de las aguas. Además, asevera que la empresa a la que representa se trasladó y llegó a las instalaciones que hoy ocupa a finales del año 1990, en tanto que la contaminación de las aguas del RÍO BOGOTÁ y del EMBALSE DEL MUÑA se originaron hace más de 35 años.

Finalmente, alega que la responsabilidad en la recuperación de las condiciones ambientales del embalse del Muña no radica y le es ajena a TROPIABASTOS LTDA., sino que recae en otras entidades.

Propone las siguientes excepciones: - AUSENCIA DE LEGITIMACIÓN EN LA CAUSA POR PASIVA - AUSENCIA DE NEXO O RELACIÓN DE CAUSALIDAD - CADUCIDAD DE LA ACCIÓN Y/O PRESCRIPCIÓN DEL DERECHO - RESPONSABILIDAD DE LA OBLIGACIÓN EN CABEZA DE TERCEROS.

**1.7.4. Grupo Siderúrgico Diaco S.A. Antes Siderúrgica De Boyacá S.A.** (1007 a 1045, c. principal 2)

Su apoderada responde que la contaminación del EMBALSE DEL MUÑA se originó en el bombeo y almacenamiento de aguas provenientes del RÍO BOGOTÁ, decisión que inicialmente adoptó y llevó a la práctica la Empresa de Energía de Bogotá S.A. y que hoy mantiene EMGESA, quien es la única que tiene la potestad de realizar o suspender el bombeo y almacenamiento de las aguas del río Bogotá en dicho embalse.

Afirma que el proceso siderúrgico realizado por el GRUPO SIDERÚRGICO DIACO S.A. no genera contaminación alguna, puesto que el agua utilizada sólo es empleada como refrigerante y por tanto no sufre ninguna alteración y, anota que por tratarse de un sistema circular y cerrado, el agua utilizada recircula indefinidamente durante el proceso productivo y jamás sale del sistema como vertimiento líquido que pueda ser conducido al río Bogotá y/o al embalse del Muña, proceso que explica de folio 1019 a 1020 del cuaderno principal No. 2.

Asevera que durante el proceso de fabricación del acero, el GRUPO SIDERÚRGICO DIACO S.A. utiliza aguas provenientes de pozos subterráneos que emplea como refrigerantes y que hace recircular indefinidamente y al finalizar el ciclo de cada proceso una parte de tales aguas se evapora por las altas temperaturas de los materiales, la restante, agrega, se almacena en tanques para su posterior enfriamiento por medio de una torre y luego nuevamente se utiliza, por lo que el proceso se clasifica como circular y cerrado y así los exiguos vertimientos que la entidad demandada hace en el RÍO BOGOTÁ son únicamente los resultantes de las aguas lluvias, las cuales no sufren alteración por el proceso industrial y, por tanto, su llegada al río no tiene el efecto de causarle alguna contaminación (fl. 1023 c. principal No. 2).

Propone las siguientes excepciones: - INEXISTENCIA DE HECHO PRODUCTOR DE DAÑO QUE PUEDA IMPUTARSE AL GRUPO SIDERÚRGICO DIACO S.A., EXISTENCIA DE ACTOS ADMINISTRATIVOS EN FIRME QUE DECLARAN LA AUSENCIA DE CONDUCTA DE LA DEMANDADA COMO PRODUCTORA DE CONTAMINACIÓN AMBIENTAL, INEXISTENCIA DE NEXO CAUSAL ENTRE LA CONDUCTA DE LA DEMANDADA Y EL DAÑO ALEGADO POR EL DEMANDANTE, HECHO EXCLUSIVO DE TERCEROS, INEXISTENCIA DE SOLIDARIDAD ENTRE GRUPO SIDERÚRGICO DIACO S.A. Y LOS LLAMADOS A ESTE

PROCESO, INEXISTENCIA DE OBLIGACIÓN LEGAL O CONTRACTUAL EXIGIBLE QUE JUSTIFIQUE EL LLAMAMIENTO EN GARANTÍA.

**1.7.5. Stanton & Cía S.A.** (fls. 1.172 a 1.203 c. principal 2)

Menciona el apoderado de STANTON & CÍA S.A. que si bien es cierto las instalaciones industriales de la entidad demandada están ubicadas cerca del EMBALSE DEL MUÑA, tal circunstancia no puede servir para acusarla de ser un agente activo de la contaminación de éste, pues está situada en áreas de actividad industrial (fl. 1176, c. principal No. 2).

De otra parte, sostiene que la empresa es cuidadosa en el desarrollo de su objetos social el cual tiene que ver con la manufacturación de zapatos, tenis, botas, chancletas, productos de caucho, plástico y cuero, para su posterior comercialización en los mercados nacionales y del exterior; porque ha minimizado la producción de residuos sólidos, de tal manera que aquellos que no se pueden reutilizar, son retirados de las instalaciones y llevados a los lugares dispuestos para tal fin, sin depositarlos al embalse.

Además, indica que el proceso industrial se lleva a cabo mediante el abastecimiento de aguas que no provienen del embalse sino de un pozo con profundidad de 155, ubicado en las instalaciones de la empresa y debidamente autorizado por la respectiva autoridad ambiental, que se utiliza como refrigerante y para producción de calor, reutilizándose en forma casi indefinida y sin que se produzcan vertimientos al embalse.

Precisa que su representada ha sido responsable con el cumplimiento de las normas ambientales y que el hecho de que el embalse haya sobrepasado su capacidad de carga y no pueda realizar su propia

autodepuración, no es su responsabilidad pues la contaminación se debe a diversos factores que se han venido acrecentando a través del tiempo.

Propone las siguientes excepciones: - STANTON & CÍA S.A. NO HA REALIZADO EN EL PASADO Y EN EL PRESENTE ACTIVIDADES CONTAMINANTES DEL EMBALSE DEL MUÑA, STANTON & CÍA S.A. DURANTE EL TIEMPO EN EL CUAL HA DESARROLLADO SU ACTIVIDAD AMBIENTAL HA DESPLEGADO UNA CONDUCTA DILIGENTE FRENTE AL MEDIO AMBIENTE, STANTON & CÍA S.A. HA ACTUADO CON RESPONSABILIDAD AMBIENTAL, LA CONTAMINACIÓN DEL EMBALSE DEL MUÑA SE DEBE A DIVERSAS FUENTES.

**1.7.6. Emcocables en Reestructuración** (fls. 1394-1406 c.p. No.3)

Inicialmente propuso la nulidad por indebida notificación, porque al representante de EMCOCABLES S.A., le fue entregada la demanda sin sus anexos y no se le notificó del llamamiento en garantía, ni la acumulación de procesos.

Respecto del debate que plantea la demanda, el apoderado de esta empresa responde que ésta no es responsable de la contaminación del Embalse del Muña, ya que se encuentra ubicada a más de sesenta kilómetros de éste, además no ha vertido ni descargado aguas o desechos y acata las normas y disposiciones de la Corporación Autónoma Regional –CAR–.

De otro lado, da cuenta que esta empresa utiliza un sistema de circuito cerrado para las aguas derivadas de su proceso productivo. Para el efecto, menciona que cuenta con una sofisticada planta de tratamiento de

aguas industriales, de alta tecnología, sistema que, dice, fue aprobado por la –CAR-. Igualmente, en lo que tiene que ver con aguas domésticas, expone que cuenta con un sistema de tratamiento a través de piscinas de oxidación, también aprobado por la CAR.

Como excepciones propone las siguientes: CUMPLIMIENTO DE LOS DEBERES PROPIOS DE LA EMPRESA EN MATERIA AMBIENTAL, AUSENCIA DE DAÑO AMBIENTAL, AUSENCIA DE NEXO CAUSAL, CAUSA EXTRAÑA, HECHO DE UN TERCERO, CONDUCTA LÍCITA DE LA EMPRESA E IMPROCEDENCIA DE LA ACCIÓN EN RELACIÓN CON EMCOCABLES.

#### **1.7.7. Industrias Spring S.A. . (fls. 1678-1693 c.p. No.3)**

El apoderado de la Sociedad Industria SPRING S.A., expresa que su representada no vierte ni almacena aguas negras en la REPRESA DEL MUÑA, ya que no tiene contacto alguno con ésta y, señala que es claro que lo discutido en esta acción popular es la contaminación del embalse del Muña, más no del Río Bogotá.

Como excepciones propone las siguientes: FALTA DE JURISDICCIÓN, FALTA DE LEGITIMACIÓN EN LA CAUSA POR PASIVA, RELACIÓN DE CAUSALIDAD Y RESPONSABILIDAD DE UN TERCERO.

#### **1.7.8. Papeles Y Corrugados Andina S.A., Antes Papeles Y Molinos S.A. (fls. 1378 a 1382 del c.p. No. 2.)**

Indica que la Corporación Autónoma Regional está llamada a mantener una conducta diligente y eficiente frente a su función de ejercer control

de los vertimientos sobre los cuerpos de agua de su jurisdicción y que le cabe la responsabilidad frente a terceros cuando las industrias que vierten sus aguas han establecido los sistemas de tratamiento requeridos por su autoridad ambiental y obtenido de ella los permisos que la ley demanda.

Precisa el señor apoderado de esta sociedad, que la ubicación de su representada en el MUNICIPIO DE SESQUILÉ, permite establecer que si bien la industria efectúa vertimientos puntuales en el Río Bogotá, estos son depositados en un tramo anterior al punto en donde capta sus aguas, tal como lo establecen las normas y la autoridad ambiental competente. Además el manejo que se le da a las aguas residuales se relaciona con un sistema de tratamiento a través de un filtro de doble malla, proceso que explica.

Considera que el demandante debe probar específicamente cuáles son los daños ciertos atribuibles directamente a PAPELES Y CORRUGADOS ANDINA S.A. (fl. 1382 del Cuad. No. 2), pues ésta ha tomado todas las medidas necesarias en materia ambiental.

**1.7.9. Proteínas Y Energéticos De Colombia S.A. –  
Proteicol S.A.** (fls. 1400-14001, c.p.2)

Afirma su apoderado judicial, que si bien la empresa realiza vertimientos al río, lo hace dentro de unos niveles aceptables definidos por la ley, lo cual a su vez está supervisado y controlado por la C.A.R.

Asegura que periódicamente se realizan análisis de laboratorio sobre sus aguas residuales que son remitidos a dicha corporación y, da cuenta que la empresa extrae agua de un pozo profundo que utiliza en su proceso productivo. Resalta que cuando el río pasa por las instalaciones de PROTEICOL en la jurisdicción de Sibaté, sus aguas vienen con un

elevado grado de contaminación, sufrida durante su trayectoria por la ciudad (fl. 1400 del Cuad. No. 2).

Así mismo, advierte que no existe nexo causal entre la actividad llevada a cabo por su representada y el deterioro y daños en el embalse, el cual, como la causa que lo origina, es totalmente ajeno a sus actividades. Expresa además, que tanto la Empresa de Energía Eléctrica de Bogotá como EMGESA, ha sido la causante y responsable directa del daño ambiental ocasionado por el vertimiento de aguas del Río Bogotá al Embalse, realizado por el sistema de bombeo (fl. 1401 del Cuad. No. 2).

Propone las siguientes excepciones: PROTEICOL S.A. NO ES LA CAUSANTE NI CONTRIBUYE A LA CONTAMINACIÓN DE LAS AGUAS DEL EMBALSE DEL MUÑA - INEXISTENCIA DE LA RELACIÓN CAUSA EFECTO ENTRE LAS ACTIVIDADES DE PROTEICOL Y LOS HECHOS DE LA DEMANDA - LA RESPONSABILIDAD ES DE EMGESA S.A. Y DE LA EMPRESA DE ENERGÍA ELÉCTRICA DE BOGOTÁ - FALTA DE JURISDICCIÓN.

#### 1.8. RESPUESTA DE LA CORPORACIÓN AUTÓNOMA REGIONAL DE CUNDINAMARCA –CAR-:

Por conducto de apoderado que al efecto constituyó, la corporación responde que ha iniciado procesos sancionatorios contra la mayoría de las empresas, al igual que la realización de programas para la recuperación del Embalse del Muña, con su respectivo seguimiento y control. (fls. 1750-1754 c.p.No.3).

Como excepciones propone las siguientes: INEXISTENCIA DEL INCUMPLIMIENTO POR OMISIÓN IMPUTABLE A LA –CAR-, IMPROCEDENCIA DE LA ACCIÓN POPULAR CONTRA LA –CAR-

## **II. ANTECEDENTES DE LA DEMANDA RADICADA BAJO EL NUMERO A.P. 00-0122**

(Cuaderno 1.1. )

A su turno, los señores **MIGUEL ÁNGEL CHAVES GARCÍA** y **JORGE HUMBERTO GONZÁLEZ** en escrito presentado el 29 de julio de 2000, interpusieron demanda contra **LA NACIÓN**, representada por los **MINISTERIOS DEL MEDIO AMBIENTE, HACIENDA, AGRICULTURA, SALUD, DESARROLLO, MINAS y de EDUCACIÓN**, el **DEPARTAMENTO DE PLANEACIÓN NACIONAL** y contra **EL INSTITUTO DE HIDROLOGÍA, METEOROLOGÍA Y ESTUDIOS AMBIENTALES “IDEAM”, LA CORPORACIÓN AUTÓNOMA REGIONAL DE CUNDINAMARCA “CAR”, EL DEPARTAMENTO DE CUNDINAMARCA, LA BENEFICENCIA DE CUNDINAMARCA, EL MUNICIPIO DE SIBATÉ, EL MUNICIPIO DE SOACHA, LA EMPRESA GENERADORA DE ENERGÍA S.A. “EMGESA S.A.”, EL DISTRITO CAPITAL y la EMPRESA DE ACUEDUCTO Y ALCANTARILLADO DE BOGOTÁ** para que se profieran las siguientes:

### **2.1. DECLARACIONES Y CONDENAS:**

“1. Que se declare que las entidades demandadas por acción o por omisión son directa y solidariamente responsables del desequilibrio y el grave daño ecológico ambiental actual de la **REPRESA DEL MUÑA**, con ocasión de la contaminación por los vertimientos directos efectuados por el sistema de bombeo de las Aguas negras del Río (sic) Bogotá (Clasificadas como clase C), sin ningún tipo de tratamiento previo, lo cual ha ocasionado perjuicios graves al medio ambiente; así como ha ocasionado perjuicios graves al medio ambiente; así como a los cuerpos de agua que la alimentan (rio -sic- muña y aguas claras); la desaparición de la flora y fauna acuática de la represa; suelo, al aire; a la salud; y que atentan directamente a la población en general del Municipio de Sibaté y a los habitantes del área de influencia.

“2. Que como consecuencia de lo anterior se condene solidariamente a los demandados a reparar el grave daño ambiental ocasionado dentro del término prudencial que se llegue a establecer y se les ordene la recuperación total del ecosistema biótico de la **REPRESA DEL MUÑA** y especialmente de los ríos (sic)

Muña, Aguas Claras, afluentes de la misma; su entorno paisajístico; su preservación como zona de especial protección ambiental y patrimonio natural del Departamento de Cundinamarca y de la Nación; para que se enmarque dentro de un desarrollo sostenible de la Región, y que redunde en el restablecimiento de los derechos colectivos ambientales vulnerados y que repercuta en el mejoramiento de la calidad de vida de todas las personas perjudicadas; partiendo de los estudios de Impacto Ambiental efectuados hasta la fecha, por los diferentes organismos que se lleguen a acreditar dentro de la actuación y los que en el curso del proceso sean necesarios hacer.

“3. Que se condene solidariamente a los demandados al pago de los daños y perjuicios ocasionados con ocasión del grave daño ambiental denunciado, a favor de las personas directamente afectadas y a las personas que lleguen a demostrarlo en concreto y/o los que se lleguen a establecer por medio de peritos idóneos que solicito se designen, teniendo en cuenta los daños ambientales causados hasta la fecha de la admisión de esta acción popular por parte del Despacho, en concordancia con lo establecido en el inciso primero del art. 34 de la Ley 472 de 1998.

“4. Que se condene solidariamente a los demandados al pago de costas y gastos del proceso, y demás condenas si ha (sic) ello hubiere lugar”.

## **2.2. HECHOS:**

2.2.1. Se refieren a la contaminación de la “REPRESA DEL MUÑA” como consecuencia del embalse por parte de la sociedad EMGESA S.A. de las aguas contaminadas del RÍO BOGOTÁ, sin ningún tipo de tratamiento, problema del que dicen los demandantes ha sido generado por el desarrollo de la ciudad capital y de los municipios del área de su influencia, como por las industrias ubicadas a lo largo del trayecto desde su nacimiento hasta la desembocadura del Río Grande de La Magdalena, pero especialmente desde el puente del Común hasta Alicachín e, igualmente ocasionado por la continua y sistemática contaminación de sus principales afluentes, entre otros en el Distrito Capital los RÍOS JUAN AMARILLO, FUCHA, TUNJUELITO, TORCA Y SALITRE, lo que hace que sus aguas en la zona baja sean consideradas dentro de la clasificación como Clase C, que corresponde a los valores más restrictivos de los usos agrícolas y pecuarios por los altos niveles de Nitrógeno, Fósforo (originados por los detergentes, fertilizantes y jabones), Coliformes Fecales, Plomo, Cromo, Mercurio, Cadmio, Amoniaco, Aceites y Grasas.

2.2.2 Se indica que el daño ambiental en los alrededores de la mencionada represa, es consecuencia del depósito de aguas con una elevada concentración de materias contaminantes, cuya descomposición anaeróbica genera nauseabundos olores, producidos especialmente por el ácido sulfídrico, que en forma no ionizada escapa a la atmósfera y que en forma gaseosa se denomina sulfuro de hidrógeno y es supremamente maloliente, tóxico, corrosivo e irritante, a más de los lodos que se depositan en su fondo que se calculan en más de 2.5 millones de metros cúbicos de sedimentos, lo que dificulta cambiar el rumbo trófico del embalse y le ha reducido en más del 6% su capacidad original, según los estudios realizados.

2.2.3. Se duelen los accionantes de la falta de política del Estado, en cuanto al grave problema de contaminación del Río Bogotá (*del cual alegan que la Nación, representada por los diferentes Ministerios contra los cuales dirigen la demanda, de acuerdo con el artículo 90 de la Constitución Nacional, es solidariamente responsable por la falta de gestión*), al igual que de la falta de control sobre el vertimiento de las aguas de las industrias y de la población, que ha llevado **a que el río se convierta en una cloaca**, destruyendo su capacidad de depuración e inutilizándolo como corredor vial; **sin que hasta la fecha exista acto administrativo, ni judicial que obligue a las entidades demandadas a ejecutar una solución concreta e íntegra para solucionar el problema.** (fls. 4-15 c.p. 1.1.).

## 2.3. RESPUESTAS DE LAS DEMANDADAS

### 2.3.1. DEPARTAMENTO NACIONAL DE PLANEACIÓN (fls. 59-61, c. 1.1.):

Invoca su apoderado, que el Departamento de Planeación Nacional carece de competencia para ejecutar acciones de saneamiento ambiental,

pues de acuerdo con las funciones establecidas en el Decreto 2410 de 1989, reiteradas en su momento en el Decreto 1273 de 1994, le corresponde la formulación y elaboración de planes y programas de desarrollo económico y social, su seguimiento y evaluación, la orientación para la asignación de gastos de inversión y la implantación de métodos y sistemas al respecto, correspondiéndole la política ambiental al MINISTERIO DEL MEDIO AMBIENTE, creado por la Ley 99 de 1993 y particularmente a las CORPORACIONES AUTÓNOMAS REGIONALES como máxima autoridad ambiental en la región de su competencia y, a los municipios la responsabilidad sobre el tratamiento de aguas residuales, según lo dispuesto en el artículo 5° de la Ley 142 de 1994.

Aduce que en virtud de la Ley 141 de 1994 (parág. 5° del art. 1°), se encuentran destinados para la recuperación del RÍO BOGOTÁ un porcentaje considerable del monto que corresponde a LA NACIÓN por regalías generadas por la explotación de los recursos naturales no renovables, la cual a través del MINISTERIO DE HACIENDA Y CRÉDITO PÚBLICO y del DEPARTAMENTO NACIONAL DE PLANEACIÓN ha servido como garante en la obtención de créditos externos, por parte de las entidades estatales correspondientes, destinados a la recuperación de dicho afluente, lo que demuestra que para el sector central de la administración, desde sus niveles de competencia no ha sido ajeno al problema.

En consecuencia, solicita que se le excluya por FALTA DE LEGITIMACIÓN EN LA CAUSA PETENDI, y, subsidiariamente, que se declare que no es directa ni solidariamente responsable del desequilibrio ecológico alegado en la demanda, por ende, no debe ser condenada a reparar el daño ambiental ni los daños y perjuicios reclamados.

2.3.2. MINISTERIO DE SALUD (fls. 66 a 67, c. 1.1.)

El Jefe de la Oficina Jurídica de este ministerio se muestra evasivo en cuanto a los trastornos de salud y demás enfermedades que según los demandantes son causa de morbilidad de la población de SIBATÉ, en cuanto se limita a responder, de un lado, que habría que determinarse si éste utiliza como fuente de agua la represa y, de otro, en lo que toca a las infecciones respiratorias agudas, dermatitis y conjuntivitis, cuya relación con la contaminación ambiental están documentadas científicamente, responde que **“convendría establecer la relación causa-efecto específica, lo que exige la realización de estudios epidemiológicos cuya existencia desconocemos y por ser de orden local son de responsabilidad de la dirección territorial de salud. Si ellos no se han realizado, convendría concertar esfuerzos alrededor de tal tarea”**.

2.3.3. DEPARTAMENTO DE CUNDINAMARCA (fls. 68 71, c. 1.1.)

Responde que sin ser el departamento agente contaminante, ha dado cumplimiento a las funciones previstas en el artículo 64 de la Ley 99 de 1993, por lo que ha adelantado acciones en las cuencas de algunos afluentes del RIO BOGOTÁ como sobre éste (de los cuales enumera algunos proyectos), y señala que por conducto de su Secretaría de Salud ejerce vigilancia sobre las actividades de fumigación que la EMPRESA DE ENERGÍA DE BOGOTÁ, hoy EMGESA S.A. realiza en el sector del EMBALSE DEL MUÑA y da cuenta de las mesas de trabajo interinstitucionales denominadas “PLAN DE VIDA MUÑA 2000”.

Señala que la contaminación del RÍO BOGOTÁ afecta de manera grave al DEPARTAMENTO DE CUNDINAMARCA, por la falta de tratamiento de aguas por parte del DISTRITO CAPITAL DE BOGOTÁ, por lo que considera que deben aunarse esfuerzos logísticos económicos por parte de éste, de la NACIÓN, de la CAR, de la Administración Municipal, la Comunidad y el propio Municipio de SIBATÉ, de los entes privados involucrados en la problemática, y de la EMPRESA GENERADORA DE ENERGÍA ELÉCTRICA S.A. o quien haga sus veces.

#### 2.3.4. MINISTERIO DE HACIENDA Y CRÉDITO PÚBLICO (fls. 81 a 85, c.1.1.)

Al igual que los demás demandados, alega que las pretensiones, declaraciones y condenas, como las medidas cautelares y provisionales solicitadas, son ajenas a la competencia funcional y legal del Ministerio de Hacienda y Crédito Público, teniendo en cuenta que es la ley la que determina sus funciones y aceptarlo sería infringir los artículos 6º y 121 de la Constitución Política por extralimitación y ejecución de funciones distintas a las asignadas por la Constitución y la Ley (fl. 84 c.p. 1.1.).

Indica que desde el punto de vista presupuestal, tampoco le podría asistir responsabilidad, porque de acuerdo con el artículo 18 del Decreto No. 111 de 1996 (Por el cual se compilan las Leyes 38 de 1989, 179 de 1994 y 225 de 1995 que conforman el Estatuto Orgánico del Presupuesto), las apropiaciones deben referirse en cada órgano de la administración a su objeto y funciones y se ejecutarán estrictamente conforme al fin para el cual fueron programadas.

2.3.5. MINISTERIO DE EDUCACIÓN NACIONAL (fls. 89-90 c.p.  
1.1.)

Se pronuncia diciendo que dentro del marco de la descentralización y de la autonomía, la Ley 115 de 1994 en sus artículos 76 al 79 (Ley general de Educación), da autonomía a cada institución educativa para estructurar su currículo y plan de estudios, por lo tanto corresponde a cada Secretaría de Educación Departamental y a cada Municipio enfocar los programas de Educación Ambiental, que debe ser enseñada como un Proyecto Ambiental Escolar (PRAE) más no como una asignatura.

Anota que en cuanto al estudio técnico y científico de la contaminación de la Represa del Muña, la institución encargada es la Corporación Autónoma Regional de Cundinamarca –CAR-.

2.3.6. EMGESA S.A. E.S.P. (fls. 206-207 c.p. 1.1)

Responde en los mismos términos que lo hiciera respecto de la demanda presentada por el señor GUSTAVO MOYA ANGEL.

2.3.7. MINISTERIO DE DESARROLLO ECONÓMICO (fls. 216-221  
c.p. 1.1.)

Comienza por decir que no tiene competencia relacionada con la inspección, vigilancia y control de los problemas que se generan en la REPRESA DEL MUÑA, como de funciones de carácter policivo-ambiental preventivas o correctivas en ese sector.

Aduce el señor apoderado, que este ministerio en ejercicio de sus funciones legales, como lo es la de proferir la política nacional del sector

de agua potable y saneamiento básico, no ha actuado u omitido directa o indirectamente al emitir algún tipo de acto administrativo que vulnere los derechos colectivos respecto de la situación actual del Embalse del Muña, por ello, anota, no hay relación de causalidad entre la contaminación expuesta y alguna conducta que se le pueda remotamente endilgar.

Hace ver que dentro de las funciones que le son asignadas en los artículos 2 y 3 del Decreto 219 de 15 de febrero de 2000, le compete la formulación y adopción de las políticas generales en materia de desarrollo económico y social, relacionadas con la competitividad, integración y desarrollo de los sectores productivos de la industria, la micro, la pequeña y mediana empresa, el comercio interno, el turismo y en materia de desarrollo urbano, especialmente, en las áreas de vivienda, equipamiento comunitario, planeamiento, ordenamiento, gestión y transporte, agua y saneamiento básico. Se refiere a las funciones que de acuerdo con el artículo 1º del referido ordenamiento le corresponden a la Dirección General de Agua Potable, las cuales transcribe, para culminar diciendo que dentro de ellas no se encuentran las preventivas u correctivas en materia ambiental, por lo que mal haría en adoptar decisiones que legalmente son de cargo de diferentes entidades ambientales.

#### 2.3.8. EMPRESA DE ACUEDUCTO Y ALCANTARILLADO DE BOGOTÁ E.A.A.B. –E.S.P. (fls. 228 a 237, c.1.1.)

El apoderado de la entidad afirma, en primer lugar, que ésta no es la encargada de la operación y mantenimiento de la estación de bombeo que genera la contaminación de la REPRESA DEL MUÑA; en segundo lugar, sostiene que la contaminación del RÍO BOGOTÁ es causada por

todos los habitantes de la ciudad y Municipios vecinos, lo cual implicó la necesidad del pago de una tasa retributiva impuesta mediante el artículo 42 de la Ley 99 de 1993 y el Decreto 901 de 1997, por la utilización directa o indirecta del agua como receptor de vertimientos puntuales.

De otro lado, señala que la política ambiental para la recuperación del Río Bogota implica costos muy altos, y que dicha entidad ha mantenido una constante preocupación desde el año 1962 cuando contrató el primer Plan Maestro de Alcantarillado.

Así mismo, expresa que en el año 1996 dio inicio al PROGRAMA SANTA FE I patrocinado con recursos del Banco Mundial por el valor de \$ 476 millones de dólares, con el fin de obtener un saneamiento básico de las cuencas de los RÍOS TORCA, GUAYMARAL, CONEJERA, JUAN AMARILLO, SALITRE, JABOQUE, TINTAL Y LAS SUBCUENCAS DEL TUNJUELITO, así como la construcción de redes troncales y secundarias, la rehabilitación del sistema de alcantarillado, el programa de protección de humedales, la rehabilitación de las zonas de ronda y del espacio público, el control de crecientes mediante la adecuación hidráulica de canales y quebradas, así como el control de inundaciones en las cuencas de los ríos Torca, Guaymaral, Salitre, Jaboque y Tintal.

La Empresa de Acueducto y Alcantarillado de Bogotá “E.A.A.B. – E.S.P.”-, desconoce algún acto administrativo o judicial dirigido a una solución integral al problema de la contaminación del Río Bogotá, salvo el Decreto 748 de 1995 del Alcalde Mayor De Santa Fe de Bogotá, por medio del cual se crea el Fondo de Tratamiento de Aguas Residuales – Río Bogotá-, para el manejo y contabilización de los recursos financieros destinados a su descontaminación.

### 2.3.9. MINISTERIO DE MINAS Y ENERGÍA

El apoderado del Ministerio de Minas y Energía, manifiesta que su poderdante no ha violado alguna a los derechos colectivos invocados en la demanda, y que además en las funciones atribuidas por la ley no se encuentra la de establecer planes y programas ambientales que propendan por la mitigación de posibles impactos ambientales en el desarrollo de una actividad productiva.

### 2.3.10. CORPORACIÓN AUTÓNOMA REGIONAL DE CUNDINAMARCA fls. 287 a 289, c.1.1.)

El mandatario judicial de esta corporación, de una parte, desconoce la **responsabilidad solidaria de su poderdante** por los hechos de que da cuenta el proceso, en cuanto invoca **su naturaleza de autoridad ambiental**, que le asigna el artículo 31 de la Ley 99 de 1993, y le adscribe **funciones y finalidades que impiden que exista relación alguna entre ésta y las entidades o personas que han ocasionado los hechos por los que se impetra la acción popular.**

De otra parte, expresa el señor apoderado, que su mandante ha ejercido sus funciones y competencias de autoridad ambiental, tal y como se demuestra a través de las acciones, diligencias y documentos que obran en el expediente 5297 iniciado en el mes de agosto de 1987, y de acuerdo con las facultades que le otorga la Ley 3 de 1961.

Culmina diciendo que por la cantidad de demandados y la forma como se describen los hechos, hacen difuso el problema y no permiten determinar

responsabilidades, lo cual puede ser despejado mediante el aludido expediente 5297 que sobre problema ambiental del EMBALSE DEL MUÑA ha adelantado como autoridad ambiental.

2.3.11. MINISTERIO DEL MEDIO AMBIENTE (fls. 332 335.  
c.1.1.)

Responde que **no le constan los hechos** de que da cuenta la demanda, los cuales “*corresponderá a las entidades competentes ... demostrar las acciones que han adelantado en este aspecto así como informar los programas que tengan para recuperar la Represa*”.

Indica que los municipios, los distritos y el Distrito Capital, según lo prescrito en el artículo 65 de la Ley 99 de 1993, tienen autoridad de policía y en coordinación con las demás autoridades del SINA les corresponde las funciones de control y vigilancia del medio ambiente y de los recursos naturales renovables y la ejecución de proyectos tendientes a la descontaminación de corrientes o depósitos de agua afectados por vertimientos del municipio y, agrega que en el artículo 3º de la Ley 136 de 1994, se les asignó la de “*Planificar el desarrollo económico social y ambiental de su territorio de conformidad con la Ley y en coordinación con otras entidades*”, como también la de “*Velar por el adecuado manejo de los recursos naturales renovables y del medio ambiente, de conformidad con la ley*”.

Recuerda que el ministerio es el ente rector del sector ambiental, según lo preceptuado en la referida Ley 99.

Remata diciendo que **la administración y manejo de los recursos naturales renovables y del medio ambiente se encuentra a cargo de las Corporaciones Autónomas Regionales**, según las previsiones de los artículos 23, 30 y 31 de la referida ley 99, normas que transcribe.

Con esas razones, se opone a las pretensiones en cuanto alega que “*no tiene competencia en ninguno de los hechos, actos acciones u omisiones de la Acción Popular que nos ocupa*”.

#### 2.3.12. INSTITUTO DE HIDROLOGIA, METEOROLOGÍA Y ESTUDIOS AMBIENTALES –IDEAM (fls. 341 a 349. c.1.1.)

El apoderado del –IDEAM-, aduce que la acusación hecha en la demanda a ésta entidad, es indeterminada y sin ningún sustento material o conocimiento de las funciones de la misma, lo que le dificulta el derecho de defensa, ya que las funciones propias del Instituto son de orden Técnico, de Asesor de carácter Científico y de Dirección y Coordinación del Sistema de Información Ambiental, es decir, aclara, tiene un carácter de asesor más no de ejecutor, por lo que no le corresponde legalmente tomar medidas que mitiguen, corrijan o compensen los daños causados al medio pues esa no es su competencia.

Indica que fue creado mediante el artículo 17 de la Ley 99 de 1993, norma que fue desarrollada por el Decreto 1277 de 1994, el cual en los artículos 5, 7 y 8 ha previsto que su función de organismo eminentemente científico y técnico, debe articularse con las de las demás autoridades ambientales y con el SISTEMA NACIONAL AMBIENTAL, lo cual se ratifica en el artículo 15 del mismo ordenamiento, por lo que en ese sentido maneja y procesa la información propia y la proveniente de las demás autoridades ambientales.

En desarrollo de ese mandato legal, da cuenta el señor apoderado, para la zona en cuestión el IDEAM cuenta con los datos existentes que corresponden a 4 puntos de muestreo sobre el RÍO BOGOTÁ en el tramo Soacha-Tocaima que recibe el impacto de las descargas de aguas del embalse, aun cuando la función de monitoreo sobre cuerpos de agua específicos le corresponde a las autoridades ambientales regionales, más sin embargo, ha diseñado y operado una red de calidad de agua superficial, que para el año 2000, se ha programado en 174 puntos de monitoreo en las principales corrientes del país.

#### 2.3.13. MUNICIPIO DE SOACHA (fls. 448 a 457, c.1.1.)

Su apoderado de la afirma, que por ser el último municipio de la Cuenca Media del Río Bogotá, es el más afectado por la contaminación que se acumula a lo largo de su recorrido por los Municipios de Villapinzón, Chocontá, Suesca, Gachancipá, Tocancipá, Zipaquirá, Cajicá, Nemocón, Chía, Cota y el Distrito Capital de Bogotá, quienes vierten sus aguas residuales sin ningún tipo de tratamiento a dicho recurso hídrico.

Por tal razón, resalta que ***“no puede asumir toda la responsabilidad de este impacto residual Regional, ni mucho menos comprometerse en la recuperación de este recurso hídrico, si no existe compromiso por parte de los demás municipios e incluso la participación del Departamento y la Nación, por cuanto no sería lógico y consecuente que el Municipio de Soacha empezara a ejercitar procesos de recuperación y descontaminación del Río, si los Municipios que encabezan la contaminación no inician esta labor, es decir, que la recuperación debe ser conjunta y consecutiva, y no individual”***.

Por otra parte, con respecto a la contaminación del Embalse del Muña, señala que la autoridad que tomó la decisión para el trasvase de las aguas fue en su época el –INDERENA, sin ninguna participación del Municipio de Soacha.

Con relación a los vertimientos al Río Soacha, asevera que el encargado de la construcción de los interceptores margen izquierda y derecha es la Gobernación de Cundinamarca, más no el Municipio dada la magnitud de la inversión. En cuanto al acueducto del Municipio de Soacha, es importante tener en cuenta que la población que toma el servicio de Acueducto y Alcantarillado de la Empresa de Acueducto y Alcantarillado de Bogotá, está concentrada en un 80% en los estratos 1 y 2, por lo que siendo la prestación del servicio totalmente subsidiada, esto promueve la expansión acelerada de zonas subnormales, *“hasta la saturación que a mediano plazo puede ocasionar una crisis financiera y social en el Municipio de Soacha, pues no existen alternativas confiables de suministros para el total de la población”*.

Por lo anterior, expresa que el municipio contempló en el Plan de Ordenamiento Territorial, las soluciones al problema de alcantarillado, del que pasa a hacer un recuento de las estrategias, proyectos y costos de los programas de educación ambiental, de recuperación de la malla verde, de protección y control en ecosistemas de importancia ambiental, de control y de vigilancia.

#### 2.3.14. MINISTERIO DE AGRICULTURA Y DESARROLLO RURAL (fls. 610 a 612. c.1.1.).

El apoderado del Ministerio afirma, que en el texto de la demanda no existe un solo hecho que comprometa la responsabilidad de su

representado, por lo que alega NO ESTÁ LEGITIMADO COMO PARTE PASIVA en la acción cursante. (fl. 611 c.p. 1.1.).

Al responder el hecho 2º de la demanda, considera necesario advertir que de acuerdo con el artículo 3º del Decreto 1279 de 1994 le corresponde a través del Ministro y de acuerdo con el Presidente de la República, **“la formulación y adopción de las políticas agropecuaria y pesquera y de desarrollo rural campesino”**, siendo los organismos del sector agropecuario y pesquero adscritos o vinculados al Ministerio los ejecutores de dichas políticas. A lo cual termina diciendo: *“Luego ante las transcripciones plasmadas e independientemente de las presuntas responsabilidades que el actor pretenda probar, o logre probar, se colige de derecho la exclusión inmediata del Ministerio por mi representado, y consecuentemente descartar como subsidiaria cualquier tipo de responsabilidad solidaria”*.

Cabe también destacar del escrito de contestación a la demanda, que el apoderado de este ministerio al contestar el hecho 9º, expresa que *“este hecho atribuye responsabilidad a varios Ministerios entre los cuales aparece mi defendido, no obstante la aplicación del artículo 90 de la Constitución Nacional, compromete a una justicia rogada, y ello implica determinar en forma concreta las razones jurídicas de Acción u Omisión de la entidad que represento”*.

2.3.15. SOCIEDAD BOGOTANA DE AGUAS Y  
SANEAMIENTO SUEZ –LYONNAISE DES EAUX –  
DEGREMONT E.S.P. S.A (681 a 693, c.1.1.)

El apoderado de esta sociedad, expone la falta de legitimación en la causa por pasiva de su poderdante, al igual que la ausencia del nexo de

causalidad entre la actividad de su representada y la contaminación del Embalse del Muña, ya que ésta se encuentra ejecutando un contrato de concesión cuyo objeto es el tratamiento de las aguas residuales del Distrito Capital, a través de las plantas de El Salitre, Fucha y Tunjuelito, lo que demuestra que no existe ninguna amenaza o violación al derecho colectivo que se invoca en la presente acción.

Señala el mandatario judicial de esta empresa, que el Contrato de Concesión 015 de 1994, que su representada está ejecutando, pone de presente que el Estado si busca descontaminar el RÍO BOGOTÁ.

De otro lado aclara, que la vinculación de su representado, no dependió de una acción u omisión por parte de éste, sino en virtud del contrato de concesión que viene ejecutando con el Distrito Capital, con base a esta afirmación, remata, no le pueden ser impuesta obligaciones distintas a las adquiridas contractualmente o en su defecto la modificación del contrato, lo cual no es posible a través de la acción popular, ya que se desconocería el principio de legalidad del contrato.

2.3.16. BENEFICENCIA DE CUNDINAMARCA (fls. 699 a 702, c.11.)

El apoderado de la Beneficencia, afirma que ésta no es responsable por acción u omisión de la contaminación de la Represa del Muña, como tampoco es el ente responsable sobre el control del medio ambiente, ya que las funciones que le fueron atribuidas por ley, se basan principalmente en el servicio social y de salud.

## **2.4. COADYUVANCIA DE LA DEFENSORÍA DEL PUEBLO REGIONAL CUNDINAMARCA** (fls. 665 a 667, c.1.1.).

Su apoderada, se refiere a las aseveraciones de los accionantes sobre la existencia de un desequilibrio y un grave daño ecológico ambiental a la REPRESA DEL MUÑA, con ocasión de los vertimientos efectuados por el sistema de bombeo de las aguas negras del RÍO BOGOTÁ, sin ningún tipo de tratamiento previo, para decir que esa es la causa de los perjuicios graves al medio ambiente y a los cuerpos de agua que alimentan el RÍO MUÑA y AGUAS CLARAS, y que conducen al desaparecimiento de la flora y de la fauna acuática en la represa, contamina el suelo, el aire y afecta la salud de los habitantes de esa jurisdicción.

Su intervención fue admitida por auto de 9 de julio de 2001 (fl. 677, c.1.1.).

## **III. ANTECEDENTES DE LA DEMANDA RADICADA BAJO EL NÚMERO A.P. 01-428**

(Cuaderno 1.2. )

Por su parte, el señor **JORGE ENRIQUE CUERVO RAMÍREZ**, por conducto de apoderado que para el efecto constituyó, en escrito presentado el 4 de agosto de 1999, promovió demanda contra el **DISTRITO CAPITAL DE BOGOTÁ** y contra la **EMPRESA DE ACUEDUCTO Y ALCANTARILLADO DE BOGOTÁ “E.A.A.B.-E.S.P.”**, con el fin de que se profieran las siguientes:

### **3.1. DECLARACIONES Y CONDENAS:**

“3. 1.1. Que los demandados **SANTA FE DE BOGOTÁ D.C.**, persona jurídica de derecho público, creada por ley y reconocida por la Constitución Política de

Colombia, representada por el señor ENRIQUE PEÑALOSA LONDIÑO, mayor de edad, vecino de Santa Fe de Bogotá, residenciado en la carrera 8 No. 10 65 de esta ciudad, y la EMPRESA DE ACUEDUCTO Y ALCANTARILLADO DE BOGOTÁ “E.A.A.B.”, persona jurídica de derecho público, del orden Distrital, residenciada en la calle 22 C No. 40 99 de esta ciudad representada por el señor DANIEL BOADA SALAZAR, mayor de edad, vecino de Santa Fe de Bogotá, residenciado en la calle 22 C 40 99 de esta ciudad, son responsables de la contaminación ambiental de los ríos el río Bogotá (sic), su principal arteria fluvial y medio de navegabilidad, el cual era a su vez alimentado por los ríos Salitre, Arzobispo, San Francisco, San Agustín, San Cristóbal, Tunjuelito, Fucha, Juan Amarillo y Río Negro, al igual que las quebradas de Torca, La Floresta, La Cita, San Cristóbal, Delicias, el Carmen, Contador, la Chorrera, La Vieja, Rosales, Chico, Las Delicias de San Diego, San Dionisio Norte, Manzanares, Momserrate, Quebradas del Zuque, Yomasa, Santa Librada, Bolonia, Chiguaza (la Pichoza), El Alañadero, La Taza, La Trompeta, La Limas, Quebrada de San Juanito, Quiba, Trompetas, Mochuelo, Estrella, El Infierno, Calderón, Bebedero y Aguas Calientes, Yerbabuena, Chuscal, los cuales constituían una gran hoya hidrográfica, al realizar en forma directa vertimientos de aguas residuales (domesticas e industriales) en los precitados ríos y quebradas, como también al permitir que los distintos urbanizadores legales e ilegales, con el beneplácito o sin este, los utilizaran como zona de descargue de aguas negras domesticas e industriales, lo cual trajo como consecuencia la contaminación de las aguas, la pérdida del nivel freático, del vaso y cause de las precitadas corrientes, pérdida de sus rondas, lugares de amortiguación y ecosistemas, pérdida del caudal de los ríos y quebradas anteriormente relacionadas, colmatación de aguas negras como consecuencia de las partículas en suspensión y material de arrastre transportado en cada uno de ellos, alteración ostensible del medio ambiente.

“3.1.2. Que los demandados SANTA FE DE BOGOTÁ D.C., ... y la EMPRESA DE ACUEDUCTO Y ALCANTARILLADO DE BOGOTÁ “E.A.A.B.”, ..., son responsables de la contaminación ambiental de los ríos el río Bogotá, su principal arteria fluvial y medio de navegabilidad, el cual era a su vez alimentado por los ríos Salitre, Arzobispo, San Francisco, San Agustín, San Cristóbal, Tunjuelito, Fucha, Juan Amarillo y Río Negro, al igual que las quebradas de Torca, La Floresta, La Cita, San Cristóbal, Delicias, el Carmen, Contador, la Chorrera, La Vieja, Rosales, Chico, Las Delicias de San Diego, San Dionisio Norte, Manzanares, Momserrate, Quebradas del Zuque, Yomasa, Santa Librada, Bolonia, Chiguaza (la Pichoza), El Alañadero, La Taza, La Trompeta, La Limas, Quebrada de San Juanito, Quiba, Trompetas, Mochuelo, Estrella, El Infierno, Calderón, Bebedero y Aguas Calientes, Yerbabuena, Chuscal, al cambiar y permitir que se cambiara el uso del suelo de las rondas al igual que permitiendo y/o tutelando la construcción de complejos urbanísticos e industriales en la zona de influencia de las aguas de estos ríos e incluso permitiendo la invasión de las mismas, con claro peligro para la vida y bienes de esas personas, lo cual trae consigo que las personas no respetaran los cuerpos de aguas como un bien de uso público, que se levanten edificaciones en zonas de uso público (rondas y zonas de influencia de las mismas 30 metros acuerdo 06 de 1990), que de hecho y de derecho se cambiara el uso del suelo sin el lleno de los requisitos de ley, que se produzcan deslizamientos y agrietamientos de unidades habitacionales enteras con graves perjuicios para el patrimonio de los moradores y de la misma demandada Santa Fe de Bogotá D.C. como de la Empresa de Acueducto y Alcantarillado de Santa Fe de Bogotá “E.A.A.B”.

“3.1.3. Que los demandados SANTA FE DE BOGOTÁ D.C., persona jurídica de derecho público, creada por ley y reconocida por la Constitución Política de Colombia, representada por el señor ENRIQUE PEÑALOSA LONDIÑO, mayor de edad, vecino de Santa Fe de Bogotá, residenciado en la carrera 8 No. 10 65 de esta ciudad, y la EMPRESA DE ACUEDUCTO Y ALCANTARILLADO DE BOGOTÁ “E.A.A.B.”, persona jurídica de derecho público, del orden Distrital, residenciada en la calle 22 C No. 40 99 de esta ciudad representada por el señor DANIEL BOADA SALAZAR, mayor de edad, vecino de Santa Fe de Bogotá, residenciado en la calle 22 C 40 99 de esta ciudad, son responsables de la contaminación ambiental de los ríos el río Bogotá, su principal arteria fluvial y medio de navegabilidad, el cual era a su vez alimentado por los ríos Salitre, Arzobispo, San Francisco, San Agustín, San Cristóbal, Tunjuelito, Fucha, Juan

Amarillo y Río Negro, al igual que las quebradas de Torca, La Floresta, La Cita, San Cristóbal, Delicias, el Carmen, Contador, la Chorrera, La Vieja, Rosales, Chico, Las Delicias de San Diego, San Dionisio Norte, Manzanares, Momserrate, Quebradas del Zuque, Yomasa, Santa Librada, Bolonia, Chiguaza (la Pichoza), El Alañadero, La Taza, La Trompeta, La Limas, Quebrada de San Juanito, Quiba, Trompetas, Mochuelo, Estrella, El Infierno, Calderón, Bebedero y Aguas Calientes, Yerbabuena, Chuscal, al utilizarlos como medio de transporte de aguas lluvias y servidas (domesticas e industriales) en forma mezclada, destruyendo el paisaje como el entorno de los mismos, al igual que los reservorios naturales, los cuales le servían como mecanismo de amortiguación en caso de inundación con clara protección para su mismo entorno en caso de inundaciones o desbordamientos de estos, por cuya conducta se ha visto afectado el medio ambiente por mayor peligro para la población ribereña, incremento en los índices de morbilidad de los ciudadanos ribereños, al igual que la potencialidad para adquirir enfermedades infectocontagiosas de la población ribereña, cambios en el uso del suelo en forma fáctica de su parte, lo que a su vez indujo a que se procediera a rellenarse los sitios de amortiguación de las cuencas, el deslizamiento de tierras y el derrumbe de viviendas, agrietamiento de casas y como consecuencia perdida de vidas y de bienes (Quebrada del Zuque y la Pichosa) donde hubo más de 10 muertos.

“3.1.4. Que como consecuencia de las anteriores responsabilidades se le condene a : Abstenerse a realizar nuevos vertimientos de aguas servidas en los ríos y quebradas, se ordene a la EMPRESA DE ACUEDUCTO Y ALCANTARILLADO DE BOGOTÁ “E.A.A.B.”, a que recupere el nivel freático y su cauce de cada uno de los ríos y quebradas, se le ordena a la Alcaldía Mayor de Santa Fe de Bogotá, que incluya dentro de su Plan de Ordenamiento Territorial “POT”, como en el Plan de Ordenamiento Territorial de cada una de las Alcaldías Locales la recuperación de los ríos que las bañan al igual que las quebradas que tributan en estos, y de los ecosistemas de cada uno de ellos, como mecanismos de protección de estos cuerpos de agua, necesarios para el sistema hídrico de la ciudad, por ser estos el medio natural de amortización de las aguas lluvias y de las cuencas que atraviesan la Sabana de Bogotá, se condene a los demandados a recuperar el espacio físico de cada uno de los ríos: demoliendo lo construido en ellos, reabriendo su vaso, ordenando se proceda a su amojonamiento, teniendo en cuenta su zona de influencia y una franja de protección mínima de 30 metros como lo establece el Acuerdo 6/90, por constituirse esta igualmente en espacio público, readquiriendo los terrenos si esto se hace necesario, realizando al acotamiento correspondiente a cada chucua, humedal o cuerpo hídrico antes relacionado, adecuarlos hidráulica a tal punto que los Ríos Bogotá, Fucha y Tunjuelito y las quebradas que los tributan puedan desbordarse, recuperándolos junto con sus lugares de amortiguamiento que permita el drenaje de las aguas sin que se les cause daño a las personas o a sus bienes, que se le ordene a la Empresa de Acueducto y Alcantarillado a recuperar y mantener no solo los causes sino los nacaderos de los mismos como elemento fundamental de ellos.

“3.1.5. Que se separen las aguas lluvias de las aguas negras por diferentes colectores, vertiendo las primeras a los ríos señalados y las segundas en planta de tratamiento para ser arrojados posteriormente a los ríos.

“3.1.6. Que se ordene a la Empresa preservar lagunas como Boca Negra, Laguna Grande, de los Tunjos o Latona, y las represas o embalses de Chisaca y la Regadera, las cuales constituyen hoy por hoy las fuentes hídricas de la Sabana y de la cual se nutre el Acueducto de Santa Fe de Bogotá.

“3.1.7. A pagar a nuestro poderdante los derechos de que tratan los artículos 1.005 y 2.360 del C.C concordantes con el artículo 132 del Decreto 2.303 de 1989 y demás normas concordantes, como las costas judiciales, si se oponen a la demanda.”

### **3.2. HECHOS**

Básicamente se contraen a que los demandados han contribuido con sus conductas, a la contaminación de los ríos y quebradas de que dan cuenta las pretensiones, al permitir la ocupación y la construcción de viviendas e instalaciones industriales en las zonas de ronda, al igual que su utilización como receptores de aguas servidas domésticas e industriales.

El demandante enumera los daños generados para cada una de las localidades bañadas por los ríos y quebradas en los folios 30 a 36 del cuaderno principal No. 1.2.

### **3.3. RESPUESTAS DE LOS DEMANDADOS.**

3.3.1. DISTRITO CAPITAL DEPARTAMENTO  
ADMINISTRATIVO DEL MEDIO AMBIENTE –DAMA-  
(fls. 60 a 78, c.p. 1.2.):

El Director de Asuntos Judiciales de la Secretaría General de la Alcaldía Mayor de Bogotá, aclara que si bien es cierto dentro de los hechos el demandante no menciona al Departamento Administrativo del Medio Ambiente –DAMA-, como autoridad omisiva, es necesario tener en cuenta que es la máxima autoridad ambiental en el perímetro urbano, por lo que frente a los hechos de la demanda, manifiesta las respectivas competencias en cuanto a la protección y defensa de los recursos naturales conforme con lo dispuesto en los Acuerdos No. 19 de 1994 (fl. 60 c.p. No. 1.2), 9 de 1990 (fl.61 c.p. No.1.2), 19 de 1994 (fl. 61 c.p. Np. 1.2) y 6 de 1990 (fl. 61 c.p. No. 1.2).

De otra parte, cita las Resoluciones expedidas por el –DAMA- en materia ambiental, en primer lugar la Resolución No. 1074 de 1997, referente a la norma de vertimientos aplicable al Distrito Capital, orientada a establecer las concentraciones máximas permisibles para ser vertidas a la red de alcantarillado (fl. 62 c.p. No. 1.2), en segundo lugar la Resolución 1558 de 1998 por medio de la cual se adoptan las metas de reducción de carga contaminante (fl. 63 c.p. No. 1.2) y, en tercer lugar la Resolución 339 de 1999 que tiene el propósito de optimizar los recursos económicos y humanos destinados al tema del vertimiento, como también da cuenta de los proyectos de construcción de las plantas de tratamiento del Salitre, Fucha y Tunjuelito, del programa de participación comunitaria para recuperar las quebradas del Distrito, del de arborización de la ronda del río Tunjuelito, de la recuperación de parques y humedales del Distrito, del parque lineal Molinos Córdoba – Juan Amarillo – Jaboque, entre otros (fls. 63-78 c.p. No. 1.2).

Es de señalar que ante la proposición de la excepción de FALTA DE JURISDICCIÓN, que por auto de 11 de junio de 2001, el JUZGADO QUINTO CIVIL DEL CIRCUITO DE BOGOTÁ a cuyo conocimiento correspondió por reparto el proceso, declaró la nulidad de lo actuado y dispuso el envío del expediente a este tribunal (fls. 125 a 128, c.1.2), avocando su trámite esta corporación por parte de la Sección Segunda, Subsección “C” mediante proveído de 8 de agosto siguiente, en el que se dispuso la admisión de la demanda, su notificación y traslado a los demandados DISTRITO CAPITAL DE BOGOTÁ y EMPRESA DE ACUEDUCTO Y ALCANTARILLADO DE BOGOTÁ y la comunicación al Ministerio Público y a la Defensoría del Pueblo Regional Bogotá. (fls. 133 a 135. c.12).

La EAAB después de notificada nuevamente procedió a responder a la demanda en los mismos términos que lo había hecho en la primera

oportunidad en escrito que además de reiterar la excepción de PLEITO PENDIENTE, propone la de COSA JUZGADA como pasa a verse. Por su lado, el DISTRITO CAPITAL DE BOGOTÁ, en escrito de 6 de septiembre posterior, solicitó que se tuviera en cuenta la respuesta que en oportunidad había presentado ante el Juzgado Quinto Civil del Circuito.

### 3.3.2. EMPRESA DE ACUEDUCTO Y ALCANTARILLADO DE BOGOTÁ “E.A.A.B- E.S.P.”. (fls. 138 a 162, c. p 1.2):

El apoderado de la Empresa de Acueducto y Alcantarillado de Bogotá - E.A.A.B.- E.S.P., afirma que la normatividad vigente en materia ambiental, no prohíbe el vertimiento de las aguas residuales a ríos o quebradas, sino que establece ciertos parámetros para hacerlo, y conlleva el pago de una tasa retributiva, por lo que dicha entidad no puede ser responsable ya que desde el punto de vista legal y tarifario, no se encuentra obligada a tener actualmente toda la infraestructura de alcantarillado, en especial la intercepción de aguas residuales, conforme con lo establecido en la Ley 142 de 1994 (fls. 86-88 c.p. No. 1.2).

De otro lado, cita las obras relevantes ejecutadas y las que se encuentran en ejecución concernientes al Programa Santa Fe I, iniciado con recursos del Banco Mundial, el cual busca la recuperación de cuencas de los ríos Torca, Guaymaral, Conejera, Juan Amarillo, Salitre, Jaboque, Tintal y subcuencas del Tunjuelo dentro del Distrito Capital, la recuperación de redes tróncas, rehabilitación del sistema de alcantarillado, protección de humedales, entre otros, obras que pasa a relacionar.

Así mismo, su apoderado, afirma que la –E.A.A.B- no ha tutelado o permitido que se utilicen los ríos como receptores o conductores de aguas servidas, como tampoco la utilización de los mismos por parte de

urbanizadores legales e ilegales, ya que dicha entidad no es la autoridad encargada de autorizar o prohibir vertimientos. De igual forma se manifiesta sobre los daños a quebradas y ríos expuestos en la demanda.

Propone la excepción de COSA JUZGADA al decir, básicamente, que los hechos que sirven de base a las pretensiones, como éstas, son los que se señalaron en la Acción Popular promovida por la señora LUZ CARMEN RAMÍREZ y Otros, que fueron objeto de sentencia de 16 de febrero de 2001, proferida por el Tribunal Administrativo de Cundinamarca y confirmada por el Consejo de Estado en la de junio 5 siguiente, providencias que acompaña (fls. 170 a 207. c.1.2.)

### **3.4. Actuación Surtida**

El despacho de la Magistrada Martha Betancur Ruíz que venía conociendo del proceso por auto de 24 de septiembre de 2001 abrió el proceso a pruebas (fls. 225-228 c.p. 1.2), etapa dentro de la cual se recaudaron las siguientes:

- Respuesta de la Empresa de Acueducto y Alcantarillado de Bogotá –E.A.A.B.-, al oficio 01-169, 01-164 y 01-166 (fls. 243-244, 262-292 c.p. 1.2).
- Respuesta de la Empresa de Acueducto y Alcantarillado de Bogotá –E.A.A.B.-, que obra a folios 244 del cuaderno 1.2.
- Respuesta de la Sección Segunda del Tribunal Administrativo de Cundinamarca, por medio del cual remite copia de la demanda y de los fallos de 1° y 2° instancia (fls.324-375 c.p. 1.2).

- Respuesta del Departamento Administrativo del Medio ambiente –DAMA- al oficio No. 01-167 (fls. 383-384 c.p. 1.2).
- Dictamen Pericial realizado por el Ingeniero GUILLERMO RUEDA RUEDA (fls. 432- 465 c.p. 1.2), del que se corrió traslado por auto de 12 de febrero 2002 (fls. 481 a 482, c.1.2.), solicitando su aclaración la EAAB (fls. 484 a 485, c.1.2.) y su complementación el apoderado del accionante (fls. 487 a 488), del cual solicitó su rechazo por extemporáneo la EAAB (fls. Fls. 496, c.1.2.).
- Complementación del dictamen pericial rendido por el Ingeniero GUILLERMO RUEDA RUEDA visible a folios 499-501 del cuaderno 1.2. Del pago de los honorarios al perito se exoneró al demandante y se dispuso notificar personalmente al Director Nacional de recursos y Acciones Judiciales de la Defensoría del Pueblo para que evaluase la solicitud de financiación pedida por el actor popular (fls. 506 a 507, c.1.2).
- Respuesta de la Corporación Autónoma Regional de Cundinamarca “CAR”- al oficio No. 01-237 (fls. 470- 471 c.p. 1.2).

Por auto de 24 de abril de 2002 la Magistrado conductora del proceso dispuso su envío del expediente para que fuese acumulado al expediente AP-01-479, el cual se avocó como ha quedado consignado en los antecedentes de esta sentencia.

**IV. ANTECEDENTES DE LA DEMANDA**  
**RADICADA BAJO EL No. 01-343.**  
**(cuaderno 1.3.)**

A su turno, los señores **MIGUEL ÁNGEL CHÁVEZ GARCÍA, JORGE HUMBERTO GONZÁLEZ, Y NICOLÁS DÍAZ ROA** en escrito presentado el 12 de junio de 2001, interpusieron demanda contra **LA NACIÓN**, representada por los **MINISTERIOS DEL MEDIO AMBIENTE, DESARROLLO ECONÓMICO, AGRICULTURA Y DESARROLLO RURAL, SALUD y de EDUCACIÓN NACIONAL, el DEPARTAMENTO DE PLANEACIÓN NACIONAL, EL INSTITUTO DE HIDROLOGÍA, METEOROLOGÍA Y ESTUDIOS AMBIENTALES “IDEAM”, EL INSTITUTO GEOGRÁFICO AGUSTÍN CODAZZI, LA SUPERINTENDENCIA DE SERVICIOS PÚBLICOS DOMICILIARIOS, LA COMISIÓN DE REGULACIÓN DE AGUA POTABLE Y SANEAMIENTO BÁSICO, CORPORACIÓN AUTÓNOMA REGIONAL DE CUNDINAMARCA “CAR”, EL DEPARTAMENTO DE CUNDINAMARCA, LOS MUNICIPIOS DE CHOCONTÁ, VILLAPINZÓN, SUESCA, SESQUILÉ, GACHANCIPÁ, TOCANCIPÁ, LA CALERA, SOPÓ, CAJICÁ, ZIPAQUIRÁ, CHÍA, COTA, TABIO, TENJO, y EN CONTRA DE PERSONAS JURÍDICAS O NATURALES QUE SE LLEGUEN A DETERMINAR**, para que se profieran las siguientes:

**4.1. DECLARACIONES Y CONDENAS:**

“3. 1.1. Que se declare que las Entidades demandadas por acción o por omisión son directa y solidariamente responsables del grave deterioro y daño ecológico ambiental que sufre el Río Funza (Bogotá), en la Cuenca Alta, y sus afluentes( especialmente las quebradas Sosa, Del Masato, San Pedro, Quincha, Guagüita, Aposentos, Piedra Gorda, de la jurisdicción del Municipio de Villapinzón, quebrada June del Municipio de Suesca, Río Tejar del Municipio de Choconta), Durante todo el trayecto comprendido desde su nacimiento del Río (Laguna del Valle- Páramo de Guachaneque), hasta la planta de tratamiento de Tibitoc, con ocasión de la contaminación por vertimientos domésticos e industriales producidos

por las entidades territoriales demandadas y los productos agroindustriales utilizados sin control en la agricultura que de manera directa, son arrojados sin ningún tipo de tratamiento previo lo cual ha ocasionado graves perjuicios al medio ambiente y a los cuerpos de agua que lo alimentan; causando igualmente un desequilibrio ecológico en todo su trayecto.

“3.1.2. Consecuentemente, que se condene solidariamente a los demandados a reparar el daño ambiental ocasionado y se ordene la recuperación de la Cuenca Alta del Río Bogotá dentro del tiempo prudencial que se llegue a establecer y por ende se les ordene la recuperación total del ecosistema biótico, la determinación y alinderado de la ronda del Río, para restablecer el entorno paisajístico, la preservación del corredor periférico, el desarrollo de obras o actividades dirigidas a recuperar, restaurar o reparar las condiciones del medio ambiente afectado como sistemas de tratamiento de aguas residuales domésticas e industriales, la recolección Municipal de los residuos líquidos mediante tuberías y conductos.

“3.1.3. Que se declare que los Municipios demandados están obligados a pagar la tasa retributiva establecida en el Decreto No. 1594 de 1984 del Ministerio de Salud, en el Decreto 901 de 1997 y reglamentadas en las resoluciones números 273 de 1997 y 372 de 1998, del Ministerio del Medio Ambiente, con ocasión de los vertimientos puntuales por las descargas de aguas residuales, domésticas e industriales arrojados directamente al Río Bogotá, sin ningún tipo de tratamiento previo, que sobrepasa los límites permitidos en dicha normatividad.

3.1.4. Por tal motivo, que se condene a los Municipios demandados a pagar a favor de la Entidad Ambiental CAR, las sumas de dinero que pericialmente se lleguen a establecer por concepto de las tasas retributivas dejadas de pagar desde el 1° de enero de 1995 hasta la fecha de la ejecutoria de la sentencia que ponga fin a esta acción.

3.1.5. Que se condene solidariamente a los demandados al pago de los daños y perjuicios ocasionados por la grave contaminación del medio ambiente y principalmente al Río Funza o Bogotá, por los vertimientos domésticos e industriales que los Municipios demandados arrojan sin ningún tipo de tratamiento previo, sin contar con los permisos de vertimientos ni de concesión de aguas y por cuanto las Entidades Territoriales demandadas no están pagando las tasas retributivas por la utilización de aguas, las cuales están consagradas en la Ley Ambiental y fueron reglamentadas por el Gobierno Nacional, y además por la omisión de la entidad ambiental CAR, al no estar cobrándolas.

3.1.6. Que se condene solidariamente a los demandados que resulten responsables, a pagar a favor de la parte actora los incentivos consagrados en la Ley en razón de esta acción popular.

3.1.7. Que se condene solidariamente a los demandados que resulten responsables al pago de costas y gastos del proceso si a ello hubiere lugar.

## **4.2. HECHOS:**

Al respecto, los legitimados en la causa por activa reseñan datos relevantes geográficamente del Río Bogotá, así como los daños que están siendo causados al medio ambiente, compendiados de la siguiente manera:

4.2.1. “El Río Bogotá, nace en la Laguna del Valle, ubicada en el Páramo de Guachaneque, en el Municipio de Villapinzón a 3200 msnm. La vegetación está formada por ericáceas, frailejones, con especial predominio de musgos y líquenes. La zona de páramo, está siendo afectada por el cultivo de papa que efectúan los propietarios en esas tierras”.

4.2.2. A lo largo del recorrido de los 89 kilómetros, desde su nacimiento hasta Tibitoc, recibe las aguas de los ríos Tejar, Sisga, Neusa, San Francisco, Negro, Barandillas, Teusacá, Frió, Chicú, cada uno recibe el aporte de diferentes quebradas, entre otras Sosa, Masato, San Pedro, Quincha, Guagüita, Piedra Gorda, Aposentos, de la jurisdicción del Municipio de Villapinzón; June, en Suesca, La Venta y los Árboles en Sesquilé y durante su trayecto sufre cambios como indica la parte actora en los siguientes términos:

- En el Municipio de Villapinzón, *“recibe Vertimientos de las aguas residuales domesticas e industriales, sin ningún tratamiento previo, provenientes de la población y del matadero municipal. La ronda del Río se encuentra en gran parte deforestada, sin ningún sistema de alcantarillado público, además de contar con un relleno sanitario construido a cielo abierto por la CAR, al cual no se le está dando un tratamiento adecuado de residuos sólidos que constituye otro actor de contaminación al medio ambiente de la región”*.
- A la altura del Municipio de Chocontá, a pesar de contar con una *“planta de tratamiento de aguas”*, implementada por la CAR, no ha tenido eficiencia en el tratamiento de aguas residuales domésticas e industriales del municipio, por no estar conectados a la misma, razón por la que el Río Bogotá continúa recibiendo las descargas de este tipo de aguas.

- En el Municipio de Suesca existe una planta de tratamiento de aguas residuales, que tampoco cumple con los parámetros de calidad y eficiencia, por lo que sigue el río recibiendo los vertimientos de las aguas residuales, aguas de escorrentía de las minas de carbón, de las ladrilleras, y los vertimientos de una pasteurizadora, razón por la cual los demandantes solicitan una auditoría ambiental a estas plantas.
- En el Municipio de Sesquilé, existen lagunas de oxidación, donde igualmente los parámetros de vertimiento sobrepasan los límites permisibles, pues este tipo de obras no son lo suficientemente idóneas a pesar de que la CAR manifiesta que ha invertido cuantiosas sumas en dichas obras.
- El Municipio de Gachancipá, no tiene planta de tratamiento, ni zanjones de oxidación, lo que agrava el problema de la contaminación del Río Bogotá.
- El Municipio de Tocancipá, aunque tiene sistema de tratamiento de aguas residuales, hace más de un año y medio no funciona, lo cual produce olores nauseabundos que afectan a la población y propende por la marcada deforestación de toda la Cuenca en el trayecto del municipio, aunando los vertimientos de la planta de Termozipa.
- El Municipio de La Calera, descarga sus vertimientos de aguas residuales domésticas al Río Teusacá, que a su vez es tributario del Río Bogotá.

- El Municipio de Cajicá, cuenta con zanjones de Oxidación, que *“se han convertido en otro dolor de cabeza para la población por la presencia de olores nauseabundos que ha causado efectos negativos en el precio de la tierra”*.
- Los Municipios de Zipaquirá, Chía, Tabio y Tenjo descargan sus aguas residuales en el Río Chicú, afluente del Bogotá, por lo que contribuyen igualmente a su contaminación.

4.2.3. Con respecto a la contaminación ambiental generada por las industrias al RÍO BOGOTÁ, señalan que una de las actividades que genera un grave impacto ambiental, la constituye la que realizan los microempresarios artesanales del cuero en el proceso de curtido de pieles en el Municipio de Villapinzón, como también los vertimientos causados por los cultivos de papa en la zona del páramo, e igualmente las aguas residuales domésticas y las aguas de escorrentía de las diferentes empresas que las desbordan en la Cuenca Alta del Río. Por todo lo anterior invocan el principio de derecho ambiental “EL QUE CONTAMINA PAGA” y acusan a las entidades demandadas por su falta de diligencia con respecto al problema que aquí se trata, así: *“La desidia de las autoridades demandadas ha sido total, y el caballito de batalla que la autoridad ambiental CAR (sic), que ha esgrimido en cuanto foro se ha realizado desde hace más de 20 años por el problema de contaminación del Río Bogotá, es el convenio CAR-BID suscrito para el saneamiento de la Cuenca Alta, y cuyos recursos se han despilfarrado sin que a la fecha se haya visto una solución concertada, apropiada y definitiva para la recuperación de la Cuenca Alta del Río Bogotá; a más que no ha existido vigilancia a dichas inversiones por los organismos de control, principalmente ante la negligente labor de la Contraloría”*.

También expresan su inconformidad manifestando que “esta problemática ambiental no ha sido mirada desde el problema regional que es, y mucho menos de la envergadura que debe ser mirada como un problema Nacional”(…)

4.2.4. Reiteran los accionantes sus quejas con respecto al daño ambiental causado en la Cuenca Alta en recursos como la flora, la fauna acuática, el agua como elemento vital de vida, así como los perjuicios causados a los habitantes de los territorios aledaños a la ronda del Río *e insisten en que la responsabilidad de todo lo aquí expuesto recae en las entidades demandadas y esta en la falta de cumplimiento por parte de éstas en hacer respetar las normas establecidas en los estatutos ambientales y constitucionales*. Concluyen su escrito de demanda, aludiendo a la falta de pronunciamientos de orden administrativo y judicial que a la fecha no existen, a la vez que reconocen la competencia de esta corporación para conocer la presente acción, y señalan los respectivos fundamentos jurídicos y constitucionales en que se apoyan sus pretensiones.

#### **4.3. RESPUESTAS DE LAS DEMANDADAS**

##### **4.3.1. MINISTERIO DE AGRICULTURA Y DESARROLLO RURAL (fls. 78 a 80. c.1.3.):**

Precisa su apoderado, que no está consagrado por la Constitución Nacional, ni por la ley, ni por norma alguna, como función de tal Ministerio, el construir, mantener, vigilar, controlar otra actividad parecida que tenga relación con el vertimiento de aguas, canales de drenaje, razón por la cual no se le puede endilgar algún tipo de responsabilidad, y, advierte que de acuerdo con el artículo 3º del Decreto 1279 de 1994 le corresponde a través del Ministro y de acuerdo con el Presidente de la República, “**la formulación y adopción de las políticas**

**agropecuaria y pesquera y de desarrollo rural campesino”**, siendo los organismos del sector agropecuario y pesquero adscritos o vinculados al Ministerio los ejecutores de las mismas. Con base en lo anterior, propone la excepción de FALTA DE LEGITIMIDAD EN LA CAUSA POR PASIVA.

#### 4.3.2. MINISTERIO DEL MEDIO AMBIENTE (fls. 93 a 103. c.1.3.)

El apoderado judicial de este Ministerio aduce que no es la autoridad ambiental competente para conocer de los vertimientos de aguas residuales domésticas e industriales que arrojan los diferentes municipios al RÍO BOGOTA, pues según lo establecido en los artículo 2, 5, 23, 30 y 31 de la Ley 99 de 1993 y los artículos 7 y 8 del Decreto 1753 de 1994, ésta función le compete directamente a la Corporación Autónoma Regional de Cundinamarca, como administradora de los recursos naturales renovables y el medio ambiente.

Pone de presente que el Ministerio del Medio Ambiente es el organismo rector de la gestión del medio ambiente y de los recursos naturales renovables en Colombia, pero no un órgano ejecutor sino de gestión, encargado de fijar las políticas sobre la protección de tales recursos, que serán aplicadas por las demás autoridades ambientales. Con esas razones, propone la excepción de FALTA DE LEGITIMACIÓN EN LA CAUSA POR PASIVA.

#### 4.3.3. MINISTERIO DE SALUD (fls. 137- a 140, c. 1.3.)

La Jefe de la Oficina Jurídica de este Ministerio manifiesta en su escrito que de conformidad con la Ley 60 de 1993, por la cual se dictan normas sobre distribución de competencias y recursos, corresponde a las

Secretarías Distritales y Municipales, en el sector de agua potable y saneamiento básico, asegurar las soluciones de tratamiento de aguas y disposición de excretas así como ejercer la vigilancia y control del saneamiento ambiental en salud pública y el control de los factores de riesgo del consumo, por lo que resalta la incompetencia del ministerio, frente a lo plasmado en el escrito de demanda, pues éste sólo dirige, coordina y formula políticas y estrategias orientadas al cumplimiento de las disposiciones contempladas en el Sistema General de Seguridad Social en Salud.

Indica que frente al manejo de residuos hospitalarios, los Ministerios de Salud y del Medio Ambiente a través del Decreto 2876 de 2000, reglamentaron ambiental y sanitariamente la gestión integral de tales residuos generados por personas naturales o jurídicas que presten servicios de salud.

#### 4.3.4. MINISTERIO DE DESARROLLO ECONÓMICO (fls. 200 a 207, c.1.3.)

Manifiesta que para el caso en cuestión, no existe cargo o imputación concreta sobre una acción o una omisión en que el Ministerio de Desarrollo Económico haya incurrido.

#### 4.3.5. MINISTERIO DE EDUCACIÓN NACIONAL (fls. 364 A 366 c.p. 1.3.)

Señala que el Ministerio de Educación no es una autoridad ambiental, por lo que no puede ser vinculado al proceso por acción u omisión alguna que propicie el deterioro ambiental

Argumenta que en relación con los programas educativos y de formación académica que se implementaron en los cursos de educación media y la labor específica que vienen adelantando los profesores de lo Municipios de la cuenca alta del Río Bogotá en los programas educativos, son las Secretarías de Educación Municipal los órganos encargados de darles aplicación a los lineamientos trazados por el Ministerio de Educación.

4.3.6. DEPARTAMENTO DE CUNDINAMARCA (fls. 265 a 268  
c.p. 1.3.)

Responde que la administración departamental ha destinado recursos para la recuperación, control y manejo ecológico ambiental en la cuenca alta y afluentes del río Bogotá, circunstancia que impide declararla como responsable por omisión o acción con ocasión del deterioro ambiental sufrido.

Propone la excepción de falta de causas que determinen la responsabilidad del Departamento de Cundinamarca en las situaciones planteadas sobre el sistema ecológico del RÍO BOGOTÁ y sus AFLUENTES y sus alrededores.

4.3.7. SUPERINTENDENCIA DE SERVICIOS PÚBLICOS (fls.  
414 a 417 c.p. 1.3.)

Se pronuncia diciendo que es obligación de la Superintendencia de Servicio Públicos velar por el fiel cumplimiento de las normas a las cuales están sujetas las empresas prestadoras de los servicios públicos domiciliarios y sancionar a las personas naturales y jurídicas por las

violaciones a las normas en que incurran en materia de prestación de los servicios públicos domiciliarios.

#### 4.3.8. CORPORACIÓN AUTÓNOMA REGIONAL DE CUNDINAMARCA (fls. 356 a 360, c.1.3.)

Con similar respuesta a la que dio la corporación frente a las demás demandas, su apoderado afirma que a la CAR ejercer las funciones de evaluación y control de actividades, proyectos o factores que generen o puedan generar un deterioro ambiental, y explica que dichas labores deben desarrollarse en coordinación con las demás autoridades locales y ambientales, como un objetivo nacional, por lo que no es dable predicar omisión de la Corporación.

#### 4.3.9. COMISIÓN DE REGULACIÓN DE AGUA POTABLE Y SANEAMIENTO BÁSICO (fls. 148 a 152, c.1.3.)

El Director Ejecutivo de la Comisión, indica que la acción es improcedente y plantea una Falta de Legitimidad por Pasiva en la medida en que el accionante no señala en el curso de la acción, los hechos mediante los cuales la Comisión está violando los derechos colectivos. El apoderado judicial, muestra su disconformidad con la vinculación de su mandante, al decir que no es competencia de esa Comisión controlar los vertimientos que se realizan a las aguas del Río Bogota, ni controlar el impacto Ambiental que se genera con los hechos de la demanda, como tampoco adelantar las acciones tendientes a la descontaminación de los cuerpos de agua, pues según la Ley 142 de 1994, sólo le corresponde regular los monopolios en la prestación de los servicios públicos, promover la competencia entre quienes presten servicios públicos, definir

criterios de eficiencia y calidad a los que deben sujetarse las empresas de servicios públicos y fijar metodologías tarifarias.

4.3.10. Instituto de Hidrología, Meteorología y Estudios Ambientales –“IDEAM”- (fls. 120 A 133, c.1.3.)

El IDEAM por conducto de apoderado judicial que al efecto constituyó, de una parte, alega que es un organismo eminentemente científico técnico, encargado del manejo, obtención procesamiento y divulgación de la información relacionada con los recursos naturales de la Nación, por lo que no es responsable del daño ambiental de la cuenca alta del RÍO BOGOTÁ, lo cual tampoco fue objeto de determinación por parte del demandante.

Nuevamente aduce esta entidad por conducto de su apoderado que la función que cumple se concentra en hacer un seguimiento y diagnóstico de la calidad ambiental a nivel nacional, diseñando y operando una red de calidad de agua superficial mientras que la función de monitoreo y control sobre los cuerpos específicos es principalmente de la CAR.

4.3.11. INSTITUTO GEOGRÁFICO AGUSTÍN CODAZZI (fls. 230 a 236. c.1.3.)

Responde que las funciones designadas a ese Instituto en nada tienen que ver con la ejecución de obras públicas, regulación y protección del medio ambiente y los recursos hídricos del país, pues su objetivo es la elaboración y actualización del mapa oficial de la República, desarrollar

las políticas y ejecutar los planes del Gobierno Nacional en materia de cartografía, agrología, catastro y geografía, por lo que cual no debió ser llamado como demandado por la contaminación del río Bogotá y por tal razón propone la excepción de falta de legitimación en la causa por pasiva.

#### 4.3.12. DISTRITO CAPITAL (fls. 156 a 188. c.1.3.)

El Director de Asuntos Judiciales de la Secretaría General de la Alcaldía Mayor de Bogotá, aclara que si bien es cierto dentro de los hechos el demandante no menciona al Departamento Administrativo del Medio Ambiente –DAMA-, como autoridad omisiva, es necesario tener en cuenta que es la máxima autoridad ambiental en el perímetro urbano, por lo que frente a los hechos de la demanda, manifiesta las respectivas competencias en cuanto a la protección y defensa de los recursos naturales conforme con lo dispuesto en los Acuerdos No. 19 de 1994, 9 de 1990, 19 de 1994 y 6 de 1990.

Así mismo, señala que la E.A.A.B. es responsable de demarcar las rondas y zonas de manejo y preservación ambiental y velará por su protección y cuidado, según lo dispuesto en el Decreto 619 de 28 de julio de 2000 (POT).

Da cuenta de los proyectos de construcción de las plantas de tratamiento del Salitre, Fucha y Tunjuelito, del programa de participación comunitaria para recuperar quebradas del Distrito, del de arborización de la ronda del río Tunjuelito, de la recuperación de parques y humedales del Distrito, del parque lineal Molinos Córdoba – Juan Amarillo – Jaboque, entre otros.

#### 4.3.13. RESPUESTAS DE LOS MUNICIPIOS

##### 4.3.13.1. Municipio De Chocontá (fls. 339 a 342, c.1.3.)

El Alcalde Municipal, afirma que el Municipio cuenta con una planta de tratamiento de aguas residuales ubicada en la parte sur occidental, la que también recibe el nombre de lagunas de estabilización o facultativas.

Aduce que el 85 % de las aguas residuales, que luego son conducidas por medio de tubería a la planta que es tratada para que luego vuelva ésta al río.

Afirma *“En la jurisdicción del Municipio de Chocontá encontramos cincuenta y cinco curtiembres en la vereda chingacio, de las cuales trece están tramitando su respectivas licencias ambientales ante la C.A.R. y las otras 42 tienen expedientes en reglamentación y licencia de la misma entidad”*

##### 4.3.13.2 Municipio De Villapinzón (fls. 351 a 355. c.1.3.).

Su apoderado afirma que el municipio ha venido adoptando medidas a fin de mitigar el impacto ambiental propio de las descargas de residuos que terminan en el río, tales como el proyecto de ordenamiento del área del Distrito de manejo, proyecto caracterización y valoración del recurso hídrico, proyecto de identificación y caracterización de la diversidad biótica municipal y su contribución al desarrollo, programa integral para el manejo de las rondas del RÍO BOGOTÁ y la QUEBRADA QUINCHA, estudios de riesgo y mitigación para el río Bogotá y proyecto piloto para el manejo alternativo de aguas residuales de curtiembres.

**4.3.13.3. Municipio De Tocancipá** (fls. 108 a 111. c.1.3.).

Su alcalde, al responder a la demanda, expone que el municipio cuenta con planta de aguas residuales, por lo cual no hace vertimientos al RÍO BOGOTÁ y, además, indica que existe una política de saneamiento básico prevista en el POT.

**4.3.13.4. Municipio de la Calera** (fls. 307 a 313. c.1.3.).

Su apoderado afirma que el municipio está atendiendo a las necesidades y bienestar común de sus asociados, ha desarrollado una serie de actividades en colaboración de la CAR, con el fin de mitigar el impacto ambiental que sobre el cause del RÍO TEUSACÁ, frente al vertimiento de aguas residuales, la construcción de la Planta de Tratamiento de Aguas Residuales que para la fecha se adelanta dentro de la jurisdicción de la Calera por la CAR, por lo cual propone la excepción de existencia de infraestructura propia del Municipio de La Calera para la recuperación y descontaminación de dicho río.

**4.3.13.5. Municipio de Sopó** (fls. 327 a 329. c.1.3.).

La apoderada judicial del Municipio de Sopó, refiere que el curso del río Bogotá ingresa al perímetro del Municipio, aguas debajo de la planta de tratamiento de Tibitoc, y su cauce, y del RÍO TEUSACÁ, sus quebradas y riachuelos afluentes del río Bogotá, desembocan aguas debajo de la planta de tratamiento de Tibitoc.

Indica que el Municipio suscribió el convenio interinstitucional No. 147 de 1991, para la construcción puesta en marcha, administración y

operación de la planta de tratamiento de aguas residuales del Municipio, mediante el sistema anaeróbico, la cual se encuentra funcionando a cargo de la CAR desde 1994. Indica que el Municipio vierte sus aguas servidas en tres sitios puntuales del RÍO TEUSACÁ y cada uno de esos puntos cuenta con un tratamiento previo mediante la utilización de pozos sépticos, los cuales vienen operando con seguimiento permanente.

#### **4.3.13.6. Municipio de Zipaquirá** (fls. 562 a 565. c.1.3.).

Su apoderado, responde que el municipio cuenta con dos importantes instalaciones técnicas para el tratamiento de aguas residuales y ha desplegado planes y programas para la protección de la ronda del RÍO BOGOTÁ.

Señala que las plantas de tratamiento, han estado bajo la responsabilidad de la CAR, por lo que el municipio resulta ajeno a cualquier situación de contaminación ambiental.

#### **4.3.13.7. Municipio de Chía** (fls. 546 a 555. c.1.3.).

El Secretario Jurídico de la Alcaldía Municipal responde a la demanda y propone la excepción de FALTA DE LEGITIMIDAD EN LA CAUSA POR PASIVA, que fundamenta en la fijación de las políticas y en la preservación del sistema hídrico, respecto del cual la Nación, el Ministerio del Medio Ambiente; el Consejo Nacional del Medio Ambiente, la CAR y los municipios forman parte del SINA.

**4.3.13.8. Municipio de Cota** (fls. 273 a 274. c.1.3.).

Su Alcalde Municipal manifiesta que se opone a las pretensiones, toda vez que el municipio no ha causado ninguna de las situaciones fácticas de que trata el libelo.

**4.3.13.9. Municipio de Tabio** (fls. 439 a 440. c.1.3.).

Su apoderado, esgrime que el municipio cumple con los requerimientos técnicos para el tratamiento de las aguas que se vierten en el RÍO CHICÚ, ya que cuenta con la planta de tratamiento de aguas y, de otro lado, manifiesta que el municipio no colinda con el RÍO BOGOTÁ.

**4.3.13.10. Municipio de Tenjo** (fls. 253 a 256. c.1.3.).

Su apoderado, contesta que los daños en el río Bogotá, no devienen de la actividad del municipio, sino que vienen siendo ocasionados por el efecto de otros factores generadores de contaminación. Sin embargo, indica que el ente territorial ha aplicado una política de mitigación de cualquier impacto que una actividad ocasione, mediante acciones concretas sobre la recuperación de las cuencas hídricas sobre los ríos de su jurisdicción.

**V. DE LAS DIFERENTES PETICIONES  
PRESENTADAS ESTANDO EL EXPEDIENTE A  
DESPACHO**

**5.1. De la Solicitud de Nulidad Presentada por el Ministerio del Medio Ambiente.** Lo primero que entra a resolver la Sala es la solicitud

de nulidad, presentada el día anterior al registro del fallo, 7 de julio del que corre, por el apoderado del MINISTERIO DEL MEDIO AMBIENTE, quien se duele de la falta de notificación al representante del ente que apodera dentro de la Acción Popular 01-479 instaurada por el señor GUSTAVO MOYA ÁNGEL.

5.1.1. A ese respecto, sobre peticiones posteriores a la fecha en que el expediente pasa a despacho para sentencia los incisos 1° y 2 ° del artículo 33 de la Ley 472 de 1998, son imperativos en prescribir:

“Vencido el término del traslado para alegar, el secretario inmediatamente pasará el expediente al despacho para que se dicte sentencia, sin que puedan proponerse incidentes, salvo el de recusación, ni surtirse actuaciones posteriores distintas a la de expedición de copias, desgloses o certificados, las cuales no interrumpirán el término para proferirlas, ni el turno que le corresponda al proceso.

“El secretario se abstendrá de pasar al despacho los escritos que contravengan esta disposición”.

5.1.2. Como puede verse la norma es imperativa en prohibir el ingreso al despacho de solicitudes, diferentes a la de recusación, posteriores a la fecha en que el expediente ingrese a despacho para sentencia, **de donde se deduce sin hesitaciones y dubitaciones** que a la Sala no le asiste el deber de pronunciarse frente a la nulidad que tardíamente invoca el apoderado del ministerio. Lo anterior, por cuanto estando pendiente la salvaguarda de un derecho colectivo, el legislador, atendiendo a la primacía del interés general, propende por la celeridad del proceso, por ende prevé su dilación por medio de peticiones que no fueron alegadas durante el curso del proceso y en la debida oportunidad. Recuérdese y **resáltase** que dicha causal de invalidez es saneable cuando se actúa dentro del proceso sin alegarla, según la prescripción del numeral 1° del inciso primero del artículo 144 del Código de Procedimiento Civil, aplicable por remisión expresa del artículo 44 de la Ley 472 de 1998, en cuanto la misma no regula esta institución y el Código Contencioso Administrativo remite a tal ordenamiento jurídico.

5.1.2.1. Por ende, si el legislador previó que las solicitudes diferentes a la de recusación no deben pasar al despacho, es porque, precisamente, no exige del sentenciador el deber de resolverlas.

5.1.3. Con todo, en orden a dejar despejado cualquier asomo de duda respecto de la violación al derecho fundamental al debido proceso a cualesquiera de los sujetos procesales, la Sala encuentra, una vez examinado el expediente, que la petición de nulidad estaba llamada a ser rechazada de plano, por cuanto como quedó anotado en los antecedentes, salta de bulto que el MINISTERIO DEL MEDIO AMBIENTE fue notificado en el proceso radicado en esta corporación bajo el número 01-479 para intervenir por virtud de la orden impartida por la Sala Civil del Tribunal Superior de Bogotá al momento de resolver las excepciones previas, dejándose claro que dentro de la referida acción no fue demandado, y no fue vinculado de manera oficiosa en tal condición, sino como interviniente, de acuerdo con las previsiones de la Ley 99 de 1993, como tampoco lo fueron los demás ministerios ni la CAR (esta fue vinculada por la denuncia del pleito que le hiciera la E.E.B.), todos los cuales fueron notificados como demandados dentro de la Acción Popular radicadas bajo los números 01-343 y 01-0222, entes contra los cuales se dirigieron sus pretensiones, corriéndoseles los correspondientes traslados, a los que le dieron respuestas en forma oportuna, de las que en este fallo se hace un resumen frente a las pretensiones.

5.1.4. Por todas esas razones, encuentra la Sala como inexplicable una solicitud tan abiertamente extemporánea como la que propone el apoderado del Ministerio de Ambiente y Desarrollo Territorial, antes Ministerio del Medio Ambiente, sin percatarse lo que dispone el artículo 33 de la Ley 472 de 1998 sobre peticiones diferentes al incidente de recusación, el cual al no prever el traslado a las partes y recurso alguno, se tramita y resuelve de plano como lo dispone el artículo 160B del

Código Contencioso Administrativo, modificado por el artículo 52 de la Ley 446 de 1998.

5.1.5. Por lo demás, en auto diez (10) de agosto del que corre, se desestimó la recusación que los apoderados del Ministerio del Medio Ambiente, la CAR y el coadyuvante LUIS ALBERTO SUAREZ SANZ hicieran a la Magistrada Sustanciadora, integrándose la Sala de Decisión con el Dr. FABIO CASTIBLANCO CALIXTO y el conjuez ENRIQUE BETANCOUR BUILLES, al apartarse la Dra. BEATRIZ MARTINEZ QUINTERO del proyecto presentado por el primero, la que a la postre salvó su voto.

## **VI. CONSIDERACIONES:**

### **6.1. CUESTIONES BÁSICAS A TENER EN CUENTA PARA LA SOLUCIÓN DEL CONFLICTO.**

6.1.1. Comenzará la Sala por señalar la procedencia de la acumulación de las diferentes acciones populares, a continuación se ocupará de los derechos colectivos que a consecuencia de la acción u omisión de los particulares y de las autoridades se indica por todos los accionantes vienen siendo permanentemente vulnerados, pasará en seguida a plantear cuál es el estado de contaminación del RÍO BOGOTA, de sus afluentes y del impacto ambiental que por el trasvase de sus aguas venía realizando la EEB, hoy por EMGESA al EMBALSE DEL MUÑA, después analizará el por qué de la responsabilidad de las autoridades y la que tienen los particulares por los vertimientos puntuales residuales en sus casas de habitación o en sus industrias, para luego indicar las diferentes Propuestas de Pacto de Cumplimiento, que fueron analizados y aprobados por todos los intervinientes, algunos de ellos registraron su

inconformidad con respecto a la escogencia de las alternativas de solución a seguir por sobretodo las presentadas por la EEB, EMGESA, la EAAB y la CAR, principales actores en la consecución del objetivo de la descontaminación de los recursos hídricos y aminoración de su impacto ambiental, a los cuales contraerá la Sala su esfuerzo, en procura de dejar claro el problema de infraestructura concerniente a la Solución Técnica Integral Para la Descontaminación del Río Bogotá, determinada y aprobada por los técnicos en la materia que representaron a cada una de las entidades involucradas en la mesa de trabajo que para el efecto se llevó a cabo una vez se presentaron y discutieron las diferentes propuestas de Pacto de Cumplimiento, luego de la cual se procedió a impartir su aprobación por quienes como partes concurrieron al proceso, de todo lo cual se dejó constancia en las respectivas actas.

6.1.2. Establecido cuál es el grado de participación de cada uno de los entes involucrados ha de tener para el logro del objetivo trazado, mediante la ejecución de obras de infraestructura, como de las acciones encaminadas a las prácticas de producción más limpia, dejando claro cuáles son las obligaciones a cumplir como producto de sus propuestas, se adentrará la Sala a examinar sobre la necesidad de proferir otras órdenes y condenas, (como así se acordó con las partes que permita cumplir la meta, esto es la descontaminación del RÍO BOGOTÁ y de sus AFLUENTES), procurando que las cargas se distribuyan entre los diferentes entes públicos en consideración al grado de responsabilidad que cada uno tiene en la causación del grave problema ambiental difuso (teniendo de presente que impartir justicia no es otra cosa que aplicar el Principio del Digesto, invocado por la EAAB, de “**dar a cada cual lo que le corresponde**”, al cual siempre se han querido sustraer, al decir que no son ellos los que contaminan), ocasionado no sólo por la acción dolosa o culposa de quienes han venido en forma directa ejercitando las prácticas que atentan contra el medio ambiente, sino por - cuestión también preponderante- el actuar omisivo y negligente de las autoridades ambientales y por todos aquellos entes públicos a los

que la Constitución y la Ley les ha venido asignando funciones que los obligaban a impedir su propagación, destacándose aquí la falta de un organigrama administrativo, en últimas su impericia, falencias que de no haber existido les hubiese permitido atender todos los frentes que implica su gestión ambiental.

6.1.3. Finalizando, con el esquema de la sentencia, la Sala después de resolver todas las pretensiones que conciernen a la descontaminación del río y sus afluentes, se ocupará de examinar las pretensiones a que se contrae la demanda presentada por el doctor CUERVO RAMÍREZ, que no sólo apuntan a lo primero sino a la ejecución de algunas acciones y obras por parte del Distrito Capital y la EAAB en torno a la protección de las zonas de rondas de ríos y quebradas, para puntualizar sobre las condenas en torno a la indemnización de perjuicios y al pago de los incentivos.

6.1.4. DE LA JUDICIALIZACIÓN DEL CONFLICTO. Por todo ello y en procura de que las órdenes y condenas a impartir a la postre no se tornen en decisiones inanes para la salvaguarda de los derechos colectivos, se requiere que el juez constitucional avance más en su tarea de solucionar no sólo normativamente el conflicto, que siendo de tal envergadura le exige (sin desconocer su autonomía e independencia frente a los demás órganos del Estado) convertirse más en un articulador de las políticas que a cada uno de los entes administrativos les corresponde ejecutar y en un colaborador, como lo pregonaba la Constitución en el artículo 113 (no otra cosa ha sido el propósito de oír a las partes en las numerosas mesas de trabajo que se llevaron a cabo en orden a procurarse de elementos de juicio para que la toma de las decisiones en esta sentencia sea acorde con la realidad, para así proteger desde ya su cumplimiento y evitar que pase a convertirse en un papel para ser enmarcado y colgado en una pared), para lo cual, teniendo como punto de referencia los diferentes recursos que conforman las rentas de los entes públicos, destinados por ley exclusivamente a la recuperación de los recursos

hídricos, procederá a impartir las órdenes tendientes a la ejecución de las obras que demanda la descontaminación del río y sus afluentes.

6.1.4.1. De esa manera, se parte de la negación que, en principio, sobre la responsabilidad solidaria en el daño ambiental dicen tener los entes públicos, por sobre todo los órganos ambientales, que si bien han realizado unas incipientes acciones de control, aún (no obstante la presentación de sus diferentes propuestas de pactos de cumplimiento) no son concientes de que a causa de su ineficiente gestión y de la inejecución de unas políticas ambientales direccionadas por el MINISTERIO DEL MEDIO AMBIENTE (de la que también son responsables los demás ministerios, por sobre todo el de Minas y Energía y el de Salud, de este último se destaca que exige la prueba de estudios epidemiológicos que le permitan a estas alturas de los años, establecer si las enfermedades infectocontagiosas como la conjuntivitis, las afecciones pulmonares y gástricas que a diario afectan la salud de los pobladores del Municipio de Sibaté y de la región circunvecina a la represa del Muña, como las de todos los riverseños, es consecuencia o no de la contaminación del RÍO BOGOTÁ y del impacto ambiental que éste genera en el embalse, como si no bastara el hecho notorio de las condiciones en que desde hace muchos años se encuentra el río, y pareciendo hacer burla, respondió que debía establecerse si sus aguas estaban siendo consumidas, exigiendo la prueba de un hecho notorio, olvidando que la misma Ley 99 -parág. Art 5-, le imponía el deber de colaborarle al Ministerio de Medio Ambiente, como ente rector de la política de salud cuando quiera que la salud humana pueda resultar afectada por las actividades reguladas por el MAVDT), quien a través del decurso de su existencia no ha asumido una posición activa para exigir de la CAR, del Distrito Capital de Bogotá, de los municipios y del departamento, el cumplimiento de sus funciones relacionadas con la preservación del medio ambiente, lo que también cabe predicar de todos los Presidentes de la República que han gobernado a la Nación Colombiana durante los últimos cuarenta años, los cuales como suprema autoridad administrativa en la ejecución de la política ambiental han debido ejercer ese poder jerárquico que les corresponde en el SINA para impedir la agravación del daño ecológico.

6.1.4.2. A ese respecto, antes de adentrarse el tribunal en el problema de la responsabilidad solidaria, caben formularse los siguientes interrogantes: ¿Para qué la existencia de unos Ministerios como entes que desarrollan las políticas del Gobierno Central- “**Presidente**”, si sólo han sido instituidos para establecerlas? ¿Existe un subdimensionamiento del aparato Estatal y un excesivo gasto burocrático con la creación de las CAR, en cuanto no existe articulación entre las políticas de aquellos con la ejecución de las funciones que a estas les corresponden? ¿Pareciera entonces que los primeros sobran, o serán las segundas? ¿Es una falacia del Estado burocrático y paquidérmico, la dualidad de entes, bajo la justificación de asignación de las políticas a unos y la ejecución de las mismas a otros? ¿Se optimiza el recurso humano cuando existe dualidad de entes dedicados a un mismo objetivo? Muestra de la ineficiencia e ineficacia de los entes creados para hacer respetar y conservar los recursos naturales son sus diferentes respuestas a las distintas demandas acumuladas, como también lo es su actitud reticente en solucionar el problema generado por sus constantes comportamientos omisivos pues ad portas de la sentencia, algunos, insisten en sus alegatos de conclusión, no obstante la presentación y aprobación por las partes a sus pactos de cumplimiento, en recriminar y calificar de apresurada y desacertada la decisión de la Rama Judicial de vincular bajo una misma cuerda a todos los que directa o indirectamente son responsables del daño ecológico, al decir que el tribunal no tenía competencia para tratar bajo una misma cuerda el problema del impacto ambiental del EMBALSE DEL MUÑA con el de la contaminación del RÍO BOGOTÁ, como si aquél no fuera consecuencia directa de éste, acumulación a la que se acudió para buscar una solución definitiva a la controversia, más que con el ánimo de impartir órdenes que a la postre siempre van a ser calificadas como el GOBIERNO DE LOS JUECES por quienes no aceptan que se les direccionen y persisten en anunciarse como IRRESPONSABLES DEL DAÑO AMBIENTAL POR TRATARSE DE SER LOS ÓRGANOS DE

CONTROL AMBIENTAL, de resolver el conflicto con el único objetivo de salvaguardar los derechos colectivos.

6.1.4.3. Serán, por ello, el Presidente de la República como primer responsable de la política ambiental (inc. 2º, art. 2º Ley 99/93) y el Congreso de la República, quienes a estas alturas del desfase de las arcas del Estado, los que deben poner punto final a esa dualidad de funciones que cohonestan con la dispersión de los recursos, en cuanto el primero como el MAVDT no sólo tienen asiento en las CAR (art. 26 ídem) y son quienes dentro del rango de jerarquía ocupan el primer puesto dentro del SINA (parag único, art. 4 Ley 99/93), sino también porque al ministerio, le correspondía asegurar la ejecución del gasto público, de las rentas que por concepto de regalías, sobretasa al predial, transferencias del sector eléctrico y las que por Ley 715 de 2001 del 41% del propósito general han venido recibiendo la CAR como los municipios, control en la inversión de tales recursos prescrito en el numeral 8º del artículo 5º de la Ley 99 de 1993, y sin que éstos, en su gran mayoría, hubiesen avanzado en la construcciones de sus Planes Maestros de Alcantarillado, obstáculo del que se vienen prevaleciendo para no verter sus aguas residuales a las PTAR, que les ha servido de pretexto para no entrar a operarlas.

6.1.4.4. No otra cosa se deduce del texto del artículo 2º de la Ley 99, por lo que la Sala no acepta la tesis del Ministerio acerca de la falta de su competencia en la descontaminación del RÍO BOGOTÁ y de sus AFLUENTES cuando le da alcance a las diferentes demandas acumuladas que se dirigen contra él en su condición de demandado, y prevalido de su tesis de ser la autoridad que fija las políticas ambientales sin que admita tener algún grado de responsabilidad en la realización de las funciones que a la CAR y a los municipios como al departamento de Cundinamarca les corresponde según dicha ley como las que se les adscriben a los entes territoriales en la Ley 715 de 2001, actitud con la que pretende radicar en cabeza de todos éstos la responsabilidad del daño

ambiental materia de este proceso, lo cual conduce a la Sala a llamar a la reflexión acerca de la necesidad de la creación de un solo ente que no sólo tenga competencia para fijar las políticas sino que sea uno mismo el que las ejecute, cuestión que aun cuando es del resorte del Ejecutivo y del Congreso, no sobra que el tribunal haga un llamado de atención a ese respecto, en orden a que en adelante no se continúe evadiendo la responsabilidad de unos y otros al invocar la autonomía de cada uno de los entes llamados a ejecutar la ley. Así prescribe la norma en cita:

**ARTICULO 2º. Creación y Objetivos del Ministerio del Medio Ambiente. Créase el MINISTERIO DEL MEDIO AMBIENTE como organismo rector de la gestión del medio ambiente y de los recursos naturales renovables, encargado de impulsar una relación de respeto y armonía del hombre con la naturaleza y de definir, en los términos de la presente ley, las políticas y regulaciones a las que se sujetarán la recuperación, conservación, protección, ordenamiento, manejo, uso y aprovechamiento de los recursos naturales renovables y el medio ambiente de la Nación, a fin de asegurar el desarrollo sostenible.**

**“El MINISTERIO DEL MEDIO AMBIENTE formulará, junto con el Presidente de la República y garantizando la participación de la comunidad, la política nacional ambiental y de recursos naturales renovables, de manera que se garantice el derecho de todas las personas a gozar de un medio ambiente sano y se proteja el patrimonio natural y la soberanía de la nación (sic).**

**“Corresponde al MINISTERIO DEL MEDIO AMBIENTE coordinar el Sistema Nacional Ambiental, SINA, que en esta Ley se organiza, para asegurar la adopción y ejecución de las políticas y de los planes, programas y proyectos respectivos, en orden a garantizar el cumplimiento de los deberes y derechos del Estado y de los particulares en relación con el medio ambiente y con el patrimonio natural de la Nación (lo subrayado es de la Sala).**

6.1.4.5. De ahí que las normas subsiguientes como todo el texto de la ley apuntan hacia la consecución de un solo objetivo: **la garantía del desarrollo sostenible**, e igualmente, no sólo le asignan al Ministerio la formulación de la política nacional en relación con el medio ambiente, sino que también le adscriben funciones como las de *“Dirigir y coordinar el proceso de planificación y la ejecución armónica de las actividades en materia ambiental, de las entidades integrantes del Sistema Nacional Ambiental (SINA)”* (No. 4º art. 5), de *“Evaluar los alcances y efectos económicos de los factores ambientales, su incorporación al valor de mercado de bienes y servicios y su impacto sobre el desarrollo de la economía nacional y su sector externo; su costo en los proyectos de mediana y grande infraestructura, así como el costo económico del deterioro y de la conservación del medio ambiente y de los recursos naturales renovables y realizar investigaciones, análisis y estudios económicos y fiscales en*

relación con los recursos presupuestales y financieros del sector de gestión ambiental y con los impuestos, tasas, contribuciones, derechos, multas e incentivos con él relacionados”, y hasta la de “definir la ejecución de los programas y proyectos que la Nación, o ésta en asocio con otras entidades públicas, deba adelantar para el saneamiento del medio ambiente o en relación con el manejo, aprovechamiento, conservación, recuperación y protección de los recursos naturales renovables y del medio ambiente” (lo subrayado es de la Sala), todo lo cual conduce a la Sala a insistir hasta el cansancio en la necesidad de **redireccionar las políticas y la ejecución relacionadas con la función ambiental hacia la fusión de unas y otras en un solo ente, o a hacer concientes al MAVDT como a la CAR que tratándose de la protección del patrimonio natural de la Nación no son dos entes diferentes sino uno sólo.**

6.1.4.6. Apuntalando sobre la ingerencia de las decisiones judiciales en los asuntos de exclusivo resorte de los demás órganos del poder público, es preciso referirse a lo que la doctrina califica como el GOBIERNO DE LOS JUECES, que dadas las condiciones actuales de los diferentes sistemas democráticos que rigen en los Estados, para justificar la existencia de éstos, requiere de su efectiva y activa participación mediante la toma de decisiones que si bien están a cargo de aquellos, es a los jueces, a los que, en últimas, corresponde adoptarlas con el único objetivo de hacer respetar los derechos que las normas constitucionales como legales consagran.

6.1.4.6.1. Así, desde la óptica de la doctrina nacional, el abogado JUAN CARLOS CORTÉS GONZÁLEZ, quien entre otros cargos ha fungido como Asesor de la Consejería Presidencial para la Reforma Institucional, en su libro “*Convivencia y Conflicto En El Estado Constitucional Colombiano*” concerniente a Judicialización de la Política o Politización de la Justicia, se refiere al punto de la siguiente manera:

**“POLÍTICAS PUBLICAS DEFINIDAS DESDE LA JUDICATURA:**

“Es evidente en este panorama que la participación de los órganos judiciales en la definición última de las políticas públicas se ha incrementado tanto en su extensión como en su profundidad.

“Tal aserto es incuestionable al repasar algunos de los casos comentados.

“Bien por la vía de las acciones de constitucionalidad y los controles de tal orden, bien por la de la defensa de los derechos fundamentales, dicha participación matiza el sistema democrático de adopción de decisiones públicas.

“Más allá de las prescripciones de la Ley 100 de 1993 y sus decretos y normas reglamentarias, la extensión de coberturas y obligaciones a cargo de las entidades promotoras de salud y las prestadoras del servicio de salud, se ha ampliado gracias a las reiteradas decisiones jurisprudenciales que dan prevalencia a la defensa del derecho a la vida y a las condiciones de dignidad que le son propias. Ordenes para otorgar prótesis, sillas de ruedas, elementos esenciales de cirugías no cubiertos en el plan obligatorio de salud, atención de vinculados al sistema pese a no contar con las semanas de cotización exigidas, son apenas algunos de los ejemplos más disidentes del nuevo orden.

“A la vez reflejan que frente al tan mencionado proceso de privatización o de extensión de tareas públicas a cargo de particulares, los órganos judiciales han asumido un papel definitorio en cuanto se refiere a las responsabilidades públicas, así se ejecuten por medio de particulares, y la promoción de condiciones de equilibrio y justicia social, con lo cual al obligar a dar aplicación y efectividad al ordenamiento jurídico desde la óptica de la Constitución humanista, gozan de un amplio reconocimiento ciudadano.

“Y qué decir de otro lado al apreciar el contenido de decisiones de constitucionalidad sobre leyes y decretos con tal carácter, con las cuales se define el sistema de financiación de vivienda o se establece el régimen mínimo de incremento salarial para servidores públicos.

“Esta reflexión por supuesto no olvida que es la Constitución la que atribuye tareas a cada órgano oficial y que en razón de su naturaleza por ejemplo a la Corte Constitucional compete revisar que las cumplidas por otros órganos se ajusten a la Carta Política. Pero sí pretende avanzar en reconocer que tras el reconocimiento de esa competencia, que el propio organismo ha ampliado en su interpretación y alcances, se está desplazando hacia la justicia el compartir tareas eminentemente de índole política, en cuanto implican definir con autoridad constitucional políticas públicas, pues hasta antes el incremento salarial de los empleados públicos en cada anualidad competía a la discreción gubernamental, pero hoy ha de adaptarse por vigencia de la Constitución y criterio de la Corte a un mínimo que respete el incremento de un índice del año anterior, para garantizar la capacidad adquisitiva de aquellos. Tal criterio jurídico constitucional está concretando un derrotero político decisorio, sin importar la naturaleza de la función o el nombre que queramos darle o el debate que sobre el punto se abra.

**“GOBIERNO DE LOS JUECES:**

“Las reflexiones que anteceden permiten intentar una renovada reflexión sobre el papel que en las democracias contemporáneas cumplen los órganos de justicia.

“Es tesis central del presente trabajo reconocer la evolución institucional de la democracia, de la mano con el devenir de las sociedades actuales sometidas a fenómenos nuevos y nuevos centros de poder, hacia estadios en los cuales la ingerencia de la actividad judicial en la adopción de decisiones públicas es cada vez mayor.

“En efecto un factor universal como la presencia de tribunales constitucionales que ejercen un tipo de control concentrado sobre los actos orgánicos y materialmente legales, determina un actor que gana atribuciones y espacios frente al descrédito

mismo de la gestión política y del debate parlamentario, sometido por esencia al vaivén de las confrontaciones partidistas.

“Los cuerpos especializados y técnicos de la judicatura, originarios de la política, pero desprovistos de intencionalidades particulares, a lo menos en razón de sus funciones atribuidas, emergen como defensores de la legalidad suprema y por ende, de los derechos inalienables de la persona. Igual papel acontece con los tribunales internacionales y de manera particular en el caso europeo, en donde se evidencia progresivamente una jurisdicción comunitaria para la promoción de tales derecho fundamentales.

“Independientemente de las vías que adopten los Estados, así como de los grados y manifestaciones del control constitucional, las decisiones que adoptan estos tribunales tanto en el caso de las acciones de constitucionalidad como de los procesos preferentes de protección de derechos, se tornan en determinaciones con efectos o aplicaciones generales o en precedentes creadores de derecho, aceptados por la comunidad.

“Es preciso reconocer que la instancia judicial participa en el proceso de definición de asuntos públicos, a través de la acción de cuerpos no emanados directamente del constituyente en grado de elector, a lo cual se suman las actividades crecientes que despliegan otros órganos de la judicatura en lo atinente al control penal y a la propia actividad de los miembros de los congresos.

“Se presenta entonces un esquema matizado de democracia en el cual es creciente la ingerencia en las decisiones colectivas y por ende, políticas, de órganos de justicia, bien de manera directa o a través de procedimientos indirectos de control y vigilancia sobre la moralidad pública o la defensa de derechos, instaurados en el ámbito del humanismo constitucional que recibe el presente milenio.

“Esa tendencia nos lleva a plantear la existencia de forma mixtas de gobierno cada día más evidentes, en las cuales puede hablarse de la combinación de sistemas democráticos con manifestaciones aristocráticas de control e ingerencia en la toma de determinaciones colectivas, que han de ser consideradas al evaluar la situación y avance de los sistemas de gobierno y proyectar el diseño de las nuevas alternativas que habrán de sintetizar las formas contemporáneas que no por universales y menos debatidas, han de ser asumidas como estáticas o perfectas.

“El debate justo es abrirlo, teniendo en cuenta esta evolución al momento de las reflexiones constitucionales sobre el papel del sistema de justicia en el Estado presente.

“Es ello tan evidente que en diferentes escenarios académicos y públicos, como también desde el propio Gobierno, se ha colocado el asunto como materia de reflexión, en procura de ajustar las facultades otorgadas por la Carta Política a la Corte Constitucional; sin mencionar el debate constante que ha mantenido esta Corporación con la Corte Suprema de Justicia, organismo que hasta la Carta de 1991 ejercía como titular concentrado de la jurisdicción constitucional.

“A más de lo anterior, ya fue puesto a consideración del Congreso de la República un proyecto de acto legislativo, es decir de reforma constitucional, en relación con el artículo 241 de la Carta en cuanto a funciones de la Corte Constitucional.

“La iniciativa de origen parlamentario, se basa según su exposición de motivos en el ejercicio por la Corte de algunas funciones que le competen a otros órganos del Estado ‘provocando con ello un grave descalabro en la organización constitucional de las instituciones democráticas...’.

“En dicha exposición de motivos se citan dos casos que a juicio de los congresistas interesados en la iniciativa ejemplifican la ampliación indebida de potestades por parte de la Corte: la inexequibilidad declarada sobre la norma que prohibía el consumo de estupefacientes y permitió el consumo de la dosis personal, con fundamento en el derecho al libre desarrollo de la personalidad y el fallo mediante el cual se fijó en dos años a partir de la ocurrencia del detrimento patrimonial, el término de prescripción para los procesos de responsabilidad fiscal, aplicando analógicamente la contemplada para la acción de reparación directa.

“Son estos dos ejemplos más de actuaciones de la Corte que han suscitado gran controversia pública y que motiva a congresistas a señalar que ‘en un país democrático, donde impera el Estado de derecho, no se concibe cómo en una de sus ramas del Poder Público exista un Ente que asuma, sin norma que lo autorice, las funciones que le competen a otras Entidades Estatales, lo que podría desembocar en el ejercicio de funciones dictatoriales’.

“La mencionada iniciativa de reforma persigue introducir al texto del artículo 241 de la Constitución en relación con las funciones de la Corte Constitucional como guarda de la integridad y supremacía de la Constitución, la siguiente expresión: ‘Sus decisiones no podrán modificar la Constitución ni las leyes, a excepción de las modificaciones naturales producidas por los fallos de inexequibilidad de las normas correspondientes y similares en cada caso en particular’.

“Es evidente que con tal modificación se persigue abrir en el escenario de la reforma constitucional, el debate sobre los alcances de la actividad judicial en la definición de políticas públicas que se expresan en normas con carácter legal, sin que su redacción sea la mas afortunada,. Igualmente la posición contraria planteará que en momento alguno el papel de la Corporación consiste en modificar la Constitución o la ley, sino aplicar preferentemente aquella según su criterio interpretativo, como norma primera.

“En todo caso avanzaremos en un debate que se anuncia como propicio a los nuevos tiempos del constitucionalismo y d el estructura del estado y la forma de gobierno en el nuevo milenio” (pags. 83 a 88, lo subrayado es de la Sala)).

6.1.4.6.2. Por su parte, en el ámbito internacional se destaca el doctrinante francés JACQUES CHEVALLIER, de cuyo libro se resume su posición en torno a la actividad del juez para dar seguridad jurídica en la salvaguarda de los derechos sustanciales y fundamentales y su posición en la Carta de Derechos de los diferentes Estados Europeos, así:

“Es aquí donde cabe resaltar el nuevo rol que en un Estado Democrático desempeña el JUEZ CONSTITUCIONAL ante la ineficiencia de la administración pública como de las demás autoridades que con sus comportamientos activos u omisivos vulneran derechos fundamentales y colectivos, para asegurar el ‘reino del derecho’. Estado de Derecho en el que el juez aparece como la piedra angular y la condición para realizar las metas y propósitos que a través de la Constitución y la Ley se propone, EN CUANTO LA JERARQUÍA DE LAS NORMAS NO ES EFECTIVA sino cuando ella es jurisdiccionalmente sancionada, de donde se predica que el CULTO DEL DERECHO LLEGA A LA SACRALIZACIÓN DEL JUEZ, JUEZ CONSTITUCIONAL PERO TAMBIÉN ORDINARIO, EREGIDO CONTRA EL ABUSO DE LOS ELEGIDOS.

“Más profusamente, la omnipotencia de los elegidos tiende a ponerse en tela de juicio, en nombre de una concepción más exigente de la democracia; la democracia no se reducirá solamente a los procesos electorales: ella supone también el respeto del pluralismo, la participación más directa de los ciudadanos en las aspiraciones colectivas y la garantía de los derechos y las libertades. Para J. HABERMAS, las condiciones procedimentales que preceden a la formación de la opinión y de la voluntad, son las que constituyen en las sociedades democráticas, las únicas fuentes de legitimidad: es necesario en efecto, que los ciudadanos puedan concebirse en todo momento como los autores del derecho respecto del cual están sometidos como destinatarios; y esto pasa necesariamente por procesos de discusión y de deliberación, codificados por el derecho. La democracia se convierte en una democracia jurídica, que es también una ‘democracia de sustancias’, fundada

sobre los derechos y una democracia de procedimiento, lo que implica el respeto de ciertas reglas por parte de las autoridades públicas.

“Correlativamente la dogmática del Estado de Derecho conduce a conferirle al derecho un lugar más importante en la sociedad. Las sociedades contemporáneas han visto un espectacular crecimiento del campo de la juridicidad, lo cual se comprueba por múltiples signos: la aparición de nuevas expresiones del derecho a nivel europeo y a nivel local, o con la institución de instancias de regulación independientes; la explosión judicial muestra que los actores sociales recurren de manera creciente a los dispositivos de protección jurídica, la formulación de las reivindicaciones sociales en términos de los derechos a conquistar o del estatuto a concebir; la necesidad de derecho justificado por la aparición de problemas nuevos como el medio ambiente o la bioética; la elevación del nivel de exigencia en relación con la norma; la necesidad creciente de seguridad y de protección que se traduce en la búsqueda de culpables en caso de daños; la proclamación incesante de nuevos ‘derechos’. Todos estos fenómenos ilustran la importancia cada vez más grande del derecho en la vida social: Pasar por la norma jurídica es considerado entonces como la garantía suprema para poner ciertos principios fuera de peligro, establecer una situación, encuadrar comportamientos; y el juez es en adelante el encargado de regular los conflictos de todo orden, y arbitrar los diversos intereses que se presentan.

“El Estado de Derecho no se realiza sino en la medida en que se asegure la existencia y protección de los derechos fundamentales, no solo consagrando su texto, sino asegurando por medio de la acción del juez su respeto y vigencia.” (Traducido del francés Jacques Chevallier, Problèmes Politiques et Sociaux L’État de droit, por el Doctor Carlos Eduardo Medellín Becerra, apoderado de la EAAB en este proceso, lo subrayado es de la Sala).

## 6.2. DEL POR QUÉ DE LA VINCULACIÓN OFICIOSA DE OTROS DEMANDADOS Y DE LA ACUMULACIÓN DE PROCESOS.

6.2.1. Comenzará la Sala por advertir que la demanda de la Acción Popular principal, esto es, la radicada bajo el número 01-479, enfila hacia la protección del medio ambiente de la REGIÓN ALEDAÑA A LA REPRESA DEL MUÑA, que lo es el MUNICIPIO DE SIBATÉ, por ser colindante a la misma, como de la zona de influencia, en la medida en que se pide que se ordene *“a la EMPRESA DE ENERGÍA ELÉCTRICA DE BOGOTÁ a realizar las obras necesarias para dar el debido tratamiento a las aguas que almacena en el ‘Embalse del Muña’, de manera que se evite el perjuicio que viene ocasionando sobre el ambiente, el espacio público y los residentes y vecinos de la región.*

6.2.2. Sin embargo, siendo la causa inmediata de ese daño ambiental la contaminación rampante que los diferentes actores conocidos como

difusos han venido ocasionando con sus conductas activas u omisivas, era imperioso su citación y comparecencia en orden a evitar una sentencia desfavorable a las pretensiones, habida cuenta, como se analizará más adelante, que el tratamiento de las aguas embalsadas no es una solución para quienes padecen de tal agravio, como tampoco lo es para nuestra madre naturaleza, si se tiene en cuenta que tal expresión encierra la idea de ponerle término o fin a los males de que padecen o, por lo menos, aminorarlo día tras día, año tras año, mediante un esfuerzo conjunto de todos los que lo producen, hasta lograr la recuperación de ese importante recurso hídrico como también el de los afluentes que lo nutren.

6.2.3. Como puede verse, el punto de entronque de las diferentes acciones populares acumuladas, lo constituye el RÍO BOGOTÁ, por lo que para que en un futuro pueda llegar a cesar la vulneración a los diferentes derechos colectivos en juego, ha sido preciso la concurrencia de todos los actores involucrados en la violación a los mismos, como así fue dirigida la acción radicada bajo el número 00-0122, en la que se demandó como responsables del daño ambiental tanto a la Nación, como a las entidades de ese orden, a la CAR, al Departamento de Cundinamarca, al Distrito Capital y al municipio de Soacha, entre otros.

6.2.4. En ese orden, una vez avocado por esta Sección el conocimiento de la acción popular que ante el Juzgado Segundo Civil del Circuito de Bogotá venía cursando, al iniciarse la audiencia de Pacto de Cumplimiento se consideró necesario vincular al proceso como demandados a los municipios de la ronda del río en consideración a los vertimientos de sus aguas residuales en forma directa a éste o a los afluentes que desembocan en el mismo, como también, como se indicó, a las industrias que fueron llamadas en garantía por EMGESA S.A., pero no en esta condición sino como demandadas.

6.2.5. En estado de trabarse la litis con los demandados vinculados dentro de la Acción 01-479, se remitieron a este proceso, las Acciones Populares 00-0122, cuyas pretensiones se refieren al daño ecológico ambiental de la REPRESA DEL MUÑA con ocasión del bombeo de las aguas del RÍO BOGOTÁ, y la 01-428 en la cual se persigue no sólo la descontaminación de esta fuente hídrica, sino de las quebradas y ríos que dentro del Distrito Capital desembocan al mismo y de aquellas fuentes hídricas de la Cuenca Alta que son objeto de la Acción Popular 01-343.

6.2.6. Con esas razones, es procedente insistir en la necesidad de trabar la relación jurídico procesal no sólo con quienes figuran como demandados en los tres procesos que se acumulan y con todas las demás personas naturales y jurídicas que por acción o por omisión han dado lugar al problema ambiental que se presenta con ocasión de la REPRESA DEL MUÑA, sino todas aquellas que son responsables por acción o por omisión con la contaminación del RÍO BOGOTÁ, cuya intervención se requiere, como quiera que BRILLA AL OJO que éste es la causa inmediata del daño a los derechos colectivos invocados en las acciones radicadas bajo los números 479 y 0122, como también es procedente la acumulación de los procesos radicados con los números 428 y 343, en consideración a que las obras para descontaminar las quebradas y ríos afluentes del RÍO BOGOTÁ, deben acometerse de manera concordante y concomitante para que sea una realidad la SOLUCIÓN TÉCNICA INTEGRAL a la que en forma concertada llegaron las partes del proceso con la dirección de la Magistrada Sustanciadora en las mesas de trabajo que para el efecto se celebraron, todo con el propósito, principal, de alcanzar los fines pretensionados, en últimas, para evitar la dispersidad de procesos que lejos de contribuir a lograrlos, propician la oportunidad para que las diferentes personas y entes involucrados continúen dando largas a la solución del grave problema ambiental.

### **6.3. DE LA VIOLACIÓN A LOS DERECHOS COLECTIVOS EN JUEGO**

6.3.1. EL GOCE DE UN AMBIENTE SANO, DE CONFORMIDAD CON LO ESTABLECIDO EN LA CONSTITUCIÓN, LA LEY Y LAS DISPOSICIONES REGLAMENTARIAS. Este derecho constitucional, está consagrado en el artículo 79 de la Carta Política, en los siguientes términos:

**“Artículo 79.- Todas las personas tienen derecho a gozar de un ambiente sano. La ley garantizará la participación de la comunidad en las decisiones que pueden afectarlo.**

**“Es deber del estado proteger la diversidad e integridad del ambiente, conservar las áreas de especial importancia ecológica y fomentar la educación para el logro de estos fines”.**

6.3.1.1. El Código Nacional de Recursos Naturales Renovables y de Protección al Medio Ambiente establece en su artículo primero que *“el ambiente es patrimonio común. El Estado y los particulares deben participar en su preservación y manejo, que son de utilidad pública social”*.

Los artículos 7 y 8 ibídem, disponen:

**“Artículo 7.- Toda persona tiene derecho a disfrutar de ambiente sano”.**

**“Artículo 8.- Se consideran factores que deterioran el ambiente, entre otros:**

**“a) La contaminación del aire, de las aguas, del suelo, y de las demás recursos naturales renovables.**

**“Se entiende por contaminación la alteración del ambiente con sustancias o formas de energía puestas en él, por actividad humana o de la naturaleza, en cantidades, concentraciones o niveles capaces de interferir el bienestar y la salud de las personas, atentar contra la flora y la fauna, degradar la calidad del ambiente de los recursos de la Nación o de los particulares.**

**“Se entiende por contaminante cualquier elemento, combinación de elementos, o forma de energía que actual o potencialmente pueda producir alteración ambiental de las precedentemente descritas. La contaminación puede ser física, química o biológica.**

**“(...)”.**

6.3.2. Es indubitable también que la contaminación del agua, no sólo trae apareja la contaminación del medio ambiente, sino que también produce graves riesgos y daños a la SALUD HUMANA y cuando su afectación recae en un grupo social, lo que es peor con bastedad en toda una COMUNIDAD, para el caso en todos los habitantes de la CUENCA DEL RÍO BOGOTÁ Y DE SUS QUEBRADAS Y RÍOS, se compromete igualmente el derecho colectivo a la SALUBRIDAD PÚBLICA.

6.3.2.1. Hechas las anteriores precisiones normativas como fácticas, y bajo el entendido de que si bien el DERECHO A LA SALUD es un derecho fundamental por lo que su realización tiene como punto de partida el sistema que organice el Estado para responder a la demanda de servicios de la comunidad, razón por la cual la doctrina y la jurisprudencia le asigna el carácter de derecho prestacional, lo que significa que requiere de un desarrollo político, legislativo, económico y técnico para garantizar su expansión y cobertura, en cuanto la prestación que involucra es programática en consideración a que exige tiempo y la apropiación de recursos, por lo que en ese sentido es progresiva.

6.3.2.2. Sin embargo, en ciertas situaciones especiales, como cuando pasan los años y *“las autoridades encargadas no han tomado las medidas efectivas que aseguren avances en la realización de las prestaciones protegidas por los derechos constitucionales, gradualmente van incurriendo en un incumplimiento (...). El que una prestación amparada por un derecho sea de carácter programático no quiere decir que no sea exigible o que eternamente pueda incumplirse”*<sup>1</sup>, el juez constitucional puede llegar a salvaguardar el DERECHO FUNDAMENTAL A LA SALUD, desde la óptica de la violación al DERECHO COLECTIVO A LA SALUBRIDAD PÚBLICA.

---

<sup>1</sup> Defensoría del Pueblo, “El derecho a la Salud en la Constitución y en los Instrumentos Internacionales, págs. 39, 50 y 51.

6.3.2.3. Sobre tales aspectos, merece recordarse que a partir de la Jurisprudencia del COMITÉ DE DERECHOS ECONÓMICOS, SOCIALES Y CULTURALES, desarrollada conforme con la Observación General 13 de los Estados Partes –párras. 1, 2, 9 y 10 y Observación General 14 sobre el derecho al disfrute del más alto nivel posible de salud –párrs 12, 33, 43 y 44), la delimitación del contenido del derecho a la salud comprende las siguientes obligaciones: a) De disponibilidad, accesibilidad, aceptabilidad y calidad; b) De respeto, protección y cumplimiento; c) Con efecto inmediato y de cumplimiento progresivo. Dentro de las primeras, la Observación General 14 en el párrafo 44 destaca como una obligación prioritaria de los Estados partes, la de ABSTENERSE DE CONTAMINAR ILEGALMENTE LA ATMÓSFERA, EL AGUA Y LA TIERRA, que puede ocurrir por el vertimiento de los desechos industriales. Paralelamente a las obligaciones de protección, se encuentra la de ADOPTAR MEDIDAS CONTRA LOS PELIGROS QUE PARA LA SALUD REPRESENTA LA CONTAMINACIÓN DEL MEDIO AMBIENTE Y LAS ENFERMEDADES PROFESIONALES ASÍ COMO TAMBIÉN CONTRA CUALQUIER OTRA AMENAZA QUE SE DETERMINE MEDIANTE DATOS EPIDEMIOLÓGICOS<sup>2</sup>, lo que pone de presente, como se indicó, la necesidad de salvaguardar el derecho colectivo a la SALUBRIDAD PÚBLICA.

6.3.2.3.1. En fin, cuando la salud de todo un conglomerado social resulta afectada por la contaminación del medio ambiente, por ende, lo está también LA SALUBRIDAD PÚBLICAS.

6.3.2.4. Cabe también mencionar que la salubridad pública está señalada en el literal g), artículo 4º de la Ley 472 de 1998, como un derecho

---

2

colectivo objeto de protección por este mecanismo procesal, que encierra la idea de que los asociados gocen de una tranquilidad sin exponerse a las contingencias y riesgos públicos y se les garantice la protección de la salud de la colectividad, para lo cual deben adoptarse medidas sanitarias frente a ciertos obstáculos, con el fin de alcanzar un estado físicamente sano.

6.3.2.4.1. Según el informe de ponencia sobre derechos colectivos, presentado a la Asamblea Nacional, *“tal derecho constituye por su especial naturaleza, un acicate a la solidaridad social, puesto al servicio de la prevención de calamidades que generalmente ocasionen daños colectivos. En verdad, el ser humano tiene derecho a vivir libre de peligros y riesgos públicos, razón por la cual no debe estar expuesto, a sabiendas, a daños contingentes capaces de afectar su integridad personal o patrimonial.*

6.2.3.4.2. Se Agrega que *“El derecho colectivo a la eliminación del daño contingente se encuentra arraigado en nuestro ordenamiento jurídico en el artículo 2352 del Código Civil. Allí se concede acción popular en todos los casos de daño contingente que por imprudencia o negligencia de alguno amenace a personas indeterminadas. **La obligación de relocalizar las comunidades que vivan en sectores de alto riesgo, impuesta al Estado por la ley de reforma urbana, le dio un renovado impulso al ejercicio de este derecho. Su reconocimiento en la nueva carta no haría otra cosa que acoger una tradición jurídica nacional**”.*<sup>3</sup>

6.3.3. EL ACCESO A LOS SERVICIOS PÚBLICOS Y A QUE SU PRESTACIÓN SEA EFECTIVA Y OPORTUNA.

La Constitución Nacional consagra este derecho en su artículo 365 así:

---

<sup>3</sup> Las acciones populares y de grupo, Pedro Pablo Camargo, 1999  
Gaceta Constitucional No.46, abril 15, 1991

**“Artículo 365. Los servicios públicos son inherentes a la finalidad social del Estado. Es deber del Estado asegurar su prestación eficiente a todos los habitantes del territorio nacional.**

Lo que quiere significar que el servicio público es una institución de la que es titular el Estado, cuya finalidad única es la de satisfacer las necesidades públicas de carácter fundamental de manera continua.

#### **6.4. DE LAS DIFERENTES COMPETENCIAS EN MATERIA AMBIENTAL DE LOS MINISTERIOS, DEPARTAMENTOS ADMINISTRATIVOS Y ENTIDADES TERRITORIALES.**

6.4.1. El daño a los recursos naturales renovables y al ambiente sano puede ocurrir por acción o por omisión. Es por ello, que la Sala no comparte la postura de los entes públicos demandados en cuanto afirman que no tienen responsabilidad alguna en la contaminación de los recursos hídricos de la referencia, para lo cual aducen que no son los autores de los vertimientos residuales a las fuentes de agua, fuera de que ponen de presente, en orden a que se le exonere de las pretensiones, las diferentes acciones que como autoridades ambientales han venido cumpliendo para culminar insistiendo en que ninguna responsabilidad tienen en el grave problema ambiental.

6.4.2. DE LAS DIFERENTES FUNCIONES DE LOS ENTES PÚBLICOS VINCULADOS. Para resolver en torno a la oposición que plantean los diferentes órganos demandados, se hace necesario establecer cuáles son las funciones que sobre la materia le han sido adscritas legalmente.

##### **6.4.2.1. De La Competencia Del Ministerio Del Medio Ambiente.**

Debe entonces partirse de la base de lo que a ese respecto prescribe la Ley 99 de 1993, por la cual “*Se crea el Ministerio del Medio Ambiente, se*

*reordena el sector público encargado de la gestión y conservación del Medio Ambiente y los Recursos Naturales Renovables, se organiza el Sistema Nacional Ambiental (SINA), y se dictan otras disposiciones”*, la cual le asigna la función de formular -con la participación de la comunidad- la política ambiental y de recursos naturales renovables, de manera que garantice el derecho de todas las personas de gozar de un ambiente sano y se proteja el patrimonio natural (art. 2).

6.4.2.1.1. Para lograr esos objetivos, según el inciso 2º de la norma en comento, le corresponde a dicho ministerio coordinar y asegurar con el SINA no solo la adopción, sino la ejecución de las políticas, planes y programas en orden a garantizar el “*cumplimiento de los **deberes y derechos del Estado y de los particulares en relación con el medio ambiente y con el patrimonio natural de la Nación***”.

**ARTICULO 4. Sistema Nacional Ambiental, SINA.** El Sistema Nacional Ambiental, SINA, es el conjunto de orientaciones, normas, actividades, recursos, programas e instituciones que permiten la puesta en marcha de los principios generales ambientales contenidos en esta ley, estará integrado por los siguientes componentes:

- 1) Los principios y orientaciones generales contenidos en la Constitución Nacional, en esta Ley y en la normatividad ambiental que la desarrolle.
- 2) La normatividad específica actual que no se derogue por esta ley y la que se desarrolle en virtud de la ley.
- 3) Las entidades del Estado responsables de la política y de la acción ambiental, señaladas en la ley.
- 4) Las organizaciones comunitarias y no gubernamentales relacionadas con la problemática ambiental.
- 5) Las fuentes y recursos económicos para el manejo y la recuperación del medio ambiente.

El gobierno Nacional reglamentará la organización y funcionamiento del Sistema Nacional Ambiental SINA.

**PARÁGRAFO.** Para todos los efectos la jerarquía en el Sistema Nacional Ambiental SINA, seguirá el siguiente orden descendente: MINISTERIO DEL MEDIO AMBIENTE, Corporaciones Autónomas Regionales, Departamentos y Distritos o Municipios.

6.4.2.1.2. La Ley 99 además de señalar la estructura administrativa del Ministerio del Medio Ambiente, creó EL CONSEJO NACIONAL AMBIENTAL. A ese respecto, debe resaltarse que éste lo conforman todos los ministros, directores de departamento administrativo, entre otros miembros, así:

**“ARTICULO 13. *El Consejo Nacional Ambiental.* Para asegurar la coordinación intersectorial a nivel público de las políticas, planes y programas en materia ambiental y de recursos naturales renovables, créase el Consejo Nacional Ambiental, el cual estará integrado por los siguientes miembros:**

- El Ministro del Medio Ambiente, quien lo presidirá
- El Ministro de Agricultura
- El Ministro de Salud
- El Ministro de Desarrollo Económico
- El Ministro de Minas y Energía
- El Ministro de Educación Nacional
- El Ministro de Obras Públicas y Transporte
- El Ministro de Defensa Nacional
- El Ministro de Comercio Exterior
- El Director del Departamento Administrativo de Planeación Nacional
- El Defensor del Pueblo
- El Contralor General de la República
- Un representante de los Gobernadores
- Un alcalde representante de la Federación Colombiana de Municipios
- El Presidente del Consejo Nacional de Oceanografía
- Un representante de las comunidades indígenas
- Un representante de las comunidades Negras
- Un representante de los gremios de la producción agrícola
- Un representante de los gremios de la producción industrial
- El Presidente de ECOPETROL o su delegado
- Un representante de los gremios de la producción minera
- Un representante de los exportadores
- Un representante de las organizaciones ambientales no gubernamentales
- Un representante de la Universidad elegido por el Consejo Nacional de Educación Superior CESU
- Un representante de los gremios de la actividad forestal”.

6.4.2.1.3. A su turno, para efectos de establecer la responsabilidad que al MINISTERIO DEL MEDIO AMBIENTE, hoy MINISTERIO DE AMBIENTE, VIVIENDA Y DESARROLLO TERRITORIAL le puede caber sobre la contaminación hídrica del RÍO BOGOTÁ y sus afluentes, es importante referirse a algunas de las funciones que debe cumplir, entre ellas se encuentran:

**“Art. 5. *Funciones del Ministerio.***

- “1. (...)
- “2. Regular las condiciones generales para el saneamiento del medio ambiente, y el uso, manejo aprovechamiento, conservación, restauración

y recuperación de los recursos naturales, a fin de impedir, reprimir, eliminar o mitigar el impacto de actividades contaminantes, deteriorantes o destructivas del entorno o del patrimonio natural;

- “8. Evaluar los alcances y efectos económicos de los factores ambientales, su incorporación al valor de mercado de bienes y servicios y su impacto sobre el desarrollo de la economía nacional y su sector externo; su costo en los proyectos de mediana y grande infraestructura, así como el costo económico del deterioro y de la conservación del medio ambiente y de los recursos naturales renovables y realizar investigaciones, análisis y estudios económicos y fiscales en relación con los recursos presupuestales y financieros del sector de gestión ambiental y con los impuestos, tasas, contribuciones, derechos, multas e incentivos con él relacionados (lo subrayado es de la Sala);
- “10. Determinar las normas ambientales mínimas y las regulaciones de carácter general sobre medio ambiente a las que deberán sujetarse los centros urbanos y asentamientos humanos y las actividades mineras, industriales, de transporte y en general todo el servicio o actividad que pueda generar directa o indirectamente daños ambientales;
- “11. Dictar regulaciones de carácter general tendientes a controlar y reducir la contaminación geosférica, hídrica, del paisaje, sonora y atmosférica, en todo el territorio nacional;
- “13. Definir la ejecución de programas y proyectos que la Nación, o ésta en asocio con otras entidades públicas, deba adelantar para el saneamiento del medio ambiente o en relación con el manejo, aprovechamiento, conservación, recuperación o protección de los recursos renovables y del medio ambiente;
- “14. Definir y regular los instrumentos administrativos y mecanismos necesarios para la prevención y el control de los factores de deterioro ambiental y determinar los criterios de evaluación, seguimiento y manejo ambientales de las actividades económicas;
- “15. Evaluar los estudios ambientales y expedir, negar o suspender la licencia ambiental correspondiente, en los casos que se señalan en el título VIII de la presente ley;
- “16. Ejercer discrecional y selectivamente, cuando las circunstancias lo ameriten, sobre los asuntos asignados a las Corporaciones Autónomas Regionales, la evaluación y control preventivo, actual o posterior, de los efectos de deterioro ambiental que puedan presentarse por la ejecución de actividades y proyectos de desarrollo, así como por la exploración, explotación, transporte, beneficio y utilización de los recursos naturales renovables y no renovables y ordenar la suspensión de los trabajos y actividades cuando a ello hubiese lugar;

**6.4.2.2. De la Competencia Privativa del Ministerio del Medio Ambiente.** Con relación a la competencia de este ministerio, en las materias que se relacionan con los aspectos ambientales que plantea este proceso, encuentra la Sala que tiene competencia privativa, esto es con exclusión de las CAR y de las entidades territoriales, en el ejercicio de las funciones señaladas en los numerales 1º, 3º y 11 del artículo 7 del

Decreto 1753 de 1994, esto es, las que se mencionan en los numerales 2, 3, 6, 10 y 11, del artículo 52 de la Ley 99 de 1993, por lo que es únicamente la autoridad prevista por la ley para otorgar licencia ambiental en los siguientes casos:

- “2. Ejecución de proyectos de gran minería.
- “3. Construcción de presas, represas o embalses con capacidad superior a doscientos millones de metros cúbicos, y construcción de centrales generadoras de energía eléctrica que excedan de 100.000 Kw de capacidad instalada así como el tendido de líneas de transmisión del sistema nacional de interconexión eléctrica y proyectos de exploración y uso de fuentes de energía virtualmente contaminantes.
- “6. Ejecución de obras públicas de redes vial, fluvial y ferroviarias nacionales;
- “10. Proyectos que adelanten las Corporaciones Autónomas Regionales a que hace referencia el numeral 19 del artículo 31 de la presente Ley.
- “11. Transvase de una cuenca a otra de corrientes de agua que excedan de 2 mt<sup>3</sup>/segundo durante los períodos de mínimo caudal”.

6.4.2.2.1. Con relación a la función que a las CAR les corresponde según el numeral 19 del artículo 31 en referencia, esta se contrae a: *“Promover y ejecutar obras de irrigación, avenimiento, defensa contra las inundaciones, regulación de cauces y corrientes de agua, y de recuperación de tierras que sean necesarias para la defensa, protección y adecuado manejo de las cuencas hidrográficas del territorio de su jurisdicción, en coordinación con los organismos directores y ejecutores del Sistema Nacional de Adecuación de Tierras, conforme a las disposiciones legales y a las previsiones técnicas correspondientes”.*

**6.4.2.3. De La Naturaleza y de la Competencia De Las Corporaciones Autónomas Regionales.** La Ley 99 de 1993, indica que *“las Corporaciones Autónomas Regionales, son entes corporativos de carácter público, creados por la ley, integrado por las entidades territoriales que por sus características constituyen geográficamente un mismo ecosistema o conforman una unidad geopolítica, biogeográfica o hidrogeográfica, dotados de autonomía administrativa y financiera, patrimonio propio y personería jurídica, encargados por la ley de administrar, dentro del área de su jurisdicción, el medio ambiente y los recursos naturales renovables y propender por su desarrollo sostenible, de*

*conformidad con las disposiciones legales y las políticas del Ministerio del Medio Ambiente”. A su vez, el artículo 30 ibídem expresa “todas las Corporaciones Autónomas Regionales tendrán por objeto la ejecución de las políticas, planes programas y proyectos sobre medio ambiente y recursos naturales renovables, **así como dar cumplida y oportuna aplicación a las disposiciones legales vigentes** sobre su disposición, administración, manejo y aprovechamiento, conforme a las regulaciones, pautas y directrices expedidas por el Ministerio del Medio Ambiente”.*

6.4.2.3.1. A ese respecto, debe recabarse que en virtud de lo reglado en el artículo 9 de los Estatutos de la referida corporación, ésta tendrá como objeto propender por el desarrollo sostenible y la protección del medio ambiente en su jurisdicción, a través de la ejecución de las políticas, programas y proyectos sobre el medio ambiente y los recursos naturales renovables. De igual manera, se encuentra relacionada dentro de sus funciones (Art. 10, numeral 2 ibídem), la de ejercer la función de máxima autoridad ambiental en el área de su jurisdicción de acuerdo con las normas de carácter superior y conforme con los criterios y directrices trazados por el Ministerio del Medio Ambiente.

6.4.2.3.2. Lo cual se reitera en el artículo 31 de la referida ley, que prevé que a las CAR les compete además de todas aquellas que se relacionan con la *ejecución de las políticas, planes y programas nacionales definidas en la ley aprobatoria del Plan Nacional de Desarrollo y del Plan Nacional de Inversiones o por el Ministerio del Medio Ambiente (No. 1º), con la promoción y realización de estudios e investigaciones en materia del medio ambiente junto con las demás entidades que conforman el SINA (No. 7), con las de asesoramiento a las entidades territoriales en la formulación de planes de educación ambiental formal, como de ejecución de aquellos de educación no formal (No. 8), entre otras, las siguientes:*

**“Art. 31. Funciones.** Las Corporaciones Autónomas Regionales ejercerán las siguientes funciones:

“3. Promover y desarrollar la participación comunitaria en actividades, programas de protección ambiental, de desarrollo sostenible y de manejo adecuado de los recursos naturales renovables;

“6. Celebrar contratos y convenios con las entidades territoriales, otras entidades públicas y privadas y con las entidades sin ánimo de lucro cuyo objeto sea la defensa y protección del medio ambiente y los recursos naturales renovables, con el fin de ejecutar de mejor manera alguna o algunas de sus funciones, cuando no correspondan al ejercicio de funciones administrativas;

“9. Otorgar concesiones, permisos, autorizaciones y licencias ambientales requeridas por la ley, por el uso, aprovechamiento o movilización de los recursos naturales renovables o para el desarrollo de actividades que afecten o puedan afectar el medio ambiente. Otorgar permisos y concesiones para aprovechamiento forestales, concesiones para el uso de aguas superficiales y subterráneas y establecer vedas para la caza y pesca deportiva.

“10. Fijar en el área de su jurisdicción, los límites de emisión, descarga, transporte o depósito de sustancias, productos, compuesto o cualquier otra materia que puedan afectar el medio ambiente o los recursos naturales renovables y prohibir, restringir o regular la fabricación, distribución, uso, disposición o vertimiento de sustancias causantes de degradación ambiental. Estos límites, restricciones y regulaciones en ningún caso podrán ser menos estrictos que los definidos por el Ministerio del medio Ambiente.

“11. Ejercer las funciones de evaluación control y seguimiento ambiental de las actividades de exploración, explotación, beneficio, transporte, uso y depósito de los recursos naturales no renovables, incluida la actividad portuaria con exclusión de las competencias atribuidas al Ministerio del medio Ambiente, así como de otras actividades, proyectos o factores que generen o puedan generar deterioro ambiental. Esta función comprende la expedición de la respectiva licencia ambiental. Las funciones a que se refiere este numeral serán ejercidas de acuerdo con el artículo 58 de esta ley;

“12. Ejercer las funciones de evaluación, control y seguimiento ambiental de los usos del agua, el suelo, el aire y los demás recursos naturales renovables, lo cual comprenderá el vertimiento, emisión o incorporación de sustancias o residuos líquidos, sólidos y gaseosos, a las aguas en cualquiera de sus formas, al aire o a los suelos, así como los vertimientos o emisiones que puedan causar daño o poner en peligro el normal desarrollo sostenible de los recursos naturales renovables o impedir u obstaculizar su empleo para otros usos. Estas funciones comprenden la expedición de las respectivas licencias ambientales, permisos, concesiones, autorizaciones y salvoconductos;

“13. Recaudar, conforme a la ley, las contribuciones, tasas, derechos, tarifas y multas por el concepto del uso y aprovechamiento de los recursos naturales renovables, fijar su monto en el territorio de su jurisdicción con base en las tarifas mínimas establecidas por el Ministerio del Medio Ambiente;”

6.4.2.3.3. De igual manera, *la facultad de otorgar licencias ambientales por las CAR* deviene de la consagración que la misma Ley 99 hace en su artículo 53, la cual prevé su reglamentación por el Gobierno Nacional en los casos en que se requiera y en aquellos en los que sea necesario

acompañar para tal efecto, el diagnóstico ambiental y el estudio de impacto ambiental.

6.4.2.3.4. En lo que respecta a la jurisdicción de la CAR REGIONAL CUNDINAMARCA (que comprende las cuencas de los Ríos Bogotá, Ubaté y Suárez), y que tiene una sede en la ciudad de Bogotá y otra en el municipio de Fusagasugá, el artículo 33 de la Ley 99 le asignó la administración del medio ambiente y de los recursos naturales renovables en el Distrito Capital de Bogotá y el territorio del Departamento de Cundinamarca (con excepción de los municipios del departamento de Cundinamarca incluidos en la jurisdicción de la CAR GUAVIO –*Gachalá, Medina, Ubalá, Junin, Gachetá, Fómeque, Mámbita y Guasca*- y de la CAR CORPOORINOQUIA –*Guayabeta, Quetame, Une, Paratebueno, Chipaque, Cáqueza, Fosca, Gutierrez, Choachí y Ubaque*- que incluye en el departamento de Boyacá: los municipios de Chiquinquirá, Saboya, San Miguel de Sema, Caldas, Buenavista y Ráquira.

#### **6.4.2.4. De la Competencia de los demás Ministerios y de los Departamentos Administrativos en Materia Ambiental.**

6.4.2.4.1. La participación de los demás ministerios en lo concerniente al medio ambiente, la prevé el artículo 5º de la Ley 99 de 1993 así:

“3. Preparar con la asesoría del Departamento Nacional de Planeación, los planes, programas y proyectos que en materia ambiental, o en relación con los recursos naturales renovables y el ordenamiento ambiental del territorio, deban incorporarse a los proyectos del Plan Nacional de inversiones que el gobierno someta a consideración del Congreso;

“5. Establecer los criterios ambientales que deben ser incorporados en la formulación de políticas sectoriales y en los procesos de planificación de los demás Ministerios y entidades, previa su consulta con esos organismos;

“6. Formular conjuntamente con el Ministerio de Salud, la política nacional de población; promover y coordinar con estos programas de control al crecimiento demográfico y hacer evaluación y seguimiento de las estadísticas demográficas nacionales.

“7. Formular conjuntamente con el Ministerio de Desarrollo Económico la política nacional de asentamientos humanos y expansión urbana, con el Ministerio de Agricultura las políticas de colonización y con el Ministerio de Comercio

Exterior, las políticas de comercio exterior que afecten los recursos naturales renovables y el medio ambiente.

“9. Adoptar conjuntamente con el Ministerio de Educación Nacional, a partir de enero de 1995, los planes y programas docentes y el pénsum que en los distintos niveles de la educación nacional se adelantarán en relación con el medio ambiente y los recursos naturales renovables, promover con dicho Ministerio programas de divulgación y educación no formal y reglamentar la prestación del servicio ambiental (lo subrayado es de la Sala).

6.4.2.4.2. El ejercicio de las funciones ambientales requiere también de la participación de algunos institutos, entre otros, de la ejecución de algunas funciones por parte del IDEAM, el cual desempeña las siguientes:

“ARTICULO 16. *De las Entidades Científicas Adscritas y Vinculadas al Ministerio del Medio Ambiente.* EL MINISTERIO DEL MEDIO AMBIENTE tendrá las siguientes en Entidades Científicas Adscritas y Vinculadas:

- a) El Instituto de Hidrología, Metereología y estudios Ambientales, IDEAM
- b) El Instituto de Investigaciones Marinas y Costeras “José Benito Vives de Andreis” INVEMAR
- c) El Instituto de Investigación de Recursos Biológicos “Alexander Von Humboldt”
- d) El Instituto Amazónico de Investigaciones Científicas “SINCHI”
- e) El Instituto de Investigaciones Ambientales del Pacífico “John Von Neuman”

“PARÁGRAFO. El Ministerio del Medio Ambiente contará además con el apoyo científico y técnico de los centros de investigación ambientales y de las universidades públicas y privadas y en especial del Instituto de Ciencias Naturales de la Universidad Nacional y de la Universidad de la Amazonia.

“ARTICULO 17. *Del Instituto de Hidrología, Metereología y Estudios Ambientales, IDEAM.* Créase el Instituto de Hidrología, Metereología y Estudios Ambientales, IDEAM, el cual se organizará como un establecimiento público de carácter nacional adscrito al MINISTERIO DEL MEDIO AMBIENTE, con autonomía administrativa, personería jurídica y patrimonio independiente, encargado del levantamiento y manejo de la información científica y técnica sobre los ecosistemas que forman parte del patrimonio ambiental del país así como de establecer las bases técnicas para clasificar y zonificar el uso del territorio nacional para los fines de la planificación y el ordenamiento del territorio.

“El IDEAM deberá obtener, analizar, estudiar, procesar y divulgar la información básica sobre Hidrología, hidrogeología, Metereología, geografía básica sobre aspectos biofísicos, geomorfología, suelos y cobertura vegetal para el manejo y aprovechamiento de los recursos biofísicos de la Nación y tendrá a su cargo el establecimiento y funcionamiento de infraestructuras metereológicas e hidrológicas nacionales para proveer informaciones, predicciones, avisos, y servicios de asesoramiento a la comunidad.

“Corresponde a este instituto efectuar el seguimiento de los recursos biofísicos de la Nación especialmente en lo referente a su contaminación y degradación, necesarios para la toma de decisiones de las autoridades ambientales.

“PARÁGRAFO 1. Trasládense al IDEAM las funciones que sobre producción, procesamiento y análisis de información geográfica básica de aspectos biofísicos

viene desempeñando la Subdirección de Geografía del Instituto Geográfico Agustín Codazzi, IGAC, junto con sus archivos, instalaciones, laboratorios y demás bienes relacionados;

“PARÁGRAFO 2. Trasládense al IDEAM las funciones que en materia de Hidrología y Metereología tiene actualmente asignadas el Instituto Colombiano de Hidrología, Metereología y Adecuación de Tierras HIMAT, el cual en lo sucesivo se denominará Instituto Nacional de Adecuación de Tierras INAT. Trasládense al IDEAM toda la información, archivos, laboratorios, centros de procesamiento de información, medios de transporte, infraestructura y equipos hidrológicos y meteorológicos, instalaciones y demás elementos de que actualmente dispone el HIMAT relacionados con sus actividades hidrológicas y meteorológicas;

“PARÁGRAFO 3. Trasládense al IDEAM las funciones que sobre investigación básica general sobre recursos naturales viene efectuando el INDERENA y de forma específica las investigaciones que sobre recursos forestales y conservación de suelos desempeñan las Subgerencias de Bosques y Desarrollo;

“PARÁGRAFO 4. Trasládense al IDEAM las funciones que en materia de aguas subterráneas tiene asignadas el Instituto de Investigaciones en Geociencias, Minería y Químico, INGEOMINAS, sin perjuicio de las actividades que el INGEOMINAS continuará adelantando dentro de los programas de exploración y evaluación de los recursos del subsuelo.

“El INGEOMINAS deberá suministrar al IDEAM toda la información disponible sobre aguas subterráneas, y la información existente en el Banco Nacional de Datos Hidrológicos.

“La estructura básica del IDEAM será establecida por el gobierno nacional.

“PARÁGRAFO 5. El IGAC prestará al IDEAM y al Ministerio del Medio Ambiente el apoyo que tendrá todos los requerimientos en lo relacionado con la información agrológica por ese Instituto.

**6.4.2.5. De La Competencia De Las Entidades Territoriales.** A ellas les corresponden las siguientes:

6.4.2.5.1. *Por Delegación.* El artículo 54 de la Ley 99, consagra la facultad de las CAR de delegar la facultad de otorgar licencias, concesiones, permisos y autorizaciones que les corresponda expedir en las entidades territoriales, salvo para la construcción de obras o para el desarrollo de actividades por parte de éstas.

6.4.2.5.2. *De las Competencias de las Grandes Ciudades.* Según la previsión del artículo 55 de la Ley 99, “*Los municipios, distritos y áreas metropolitanas cuya población urbana sea superior a 1.000.000 de habitantes serán competentes, dentro de su perímetro urbano, para el otorgamiento de licencias*

*ambientales, permisos, concesiones y autorizaciones cuya expedición no esté atribuida al MINISTERIO DEL MEDIO AMBIENTE.*

6.4.2.5.2.1. Tal norma se acompasa con lo prescrito en el artículo 65 de la misma ley, el cual preceptúa:

“Los municipios, distritos o áreas metropolitanas cuya población urbana fuere igual o superior a un millón de habitantes (1.000.000) ejercerán dentro del perímetro urbano las mismas funciones atribuidas a las Corporaciones Autónomas Regionales en lo que fuere aplicable al medio ambiente urbano. Además de las licencias ambientales, concesiones, permisos y autorizaciones, que les corresponda otorgar para el ejercicio de actividades o la ejecución de obras dentro del territorio de su jurisdicción, las autoridades municipales, distritales o metropolitanas tendrán la responsabilidad de efectuar el control de vertimientos y emisiones, contaminantes, disposición de desechos sólidos y de residuos tóxicos y peligrosos, dictar las medidas de corrección o mitigación de daños ambientales y adelantar proyectos de saneamiento y descontaminación.

“Los municipios, distritos o áreas metropolitanas de que trata el presente artículo asumirán ante las Corporaciones Autónomas Regionales la obligación de transferir el 50% del recaudo de las tasas retributivas o compensatorias causadas dentro del perímetro urbano y de servicios, por el vertimiento de afluentes contaminantes conducidos por la red de servicios públicos y arrojados fuera de dicho perímetro, según el grado de materias contaminantes no eliminadas con que se haga el vertimiento”.

6.4.2.5.2.2. De las anteriores prescripciones normativas se extrae que los municipios, distritos, o áreas metropolitanas con población superior a 1.000.000 de habitantes tienen la misma competencia ambiental que le corresponde a las CAR, pero dentro del área urbana. De igual manera, se deduce que los demás municipios pueden ejercer la competencia de expedir licencias, permisos, o autorizaciones **cuando la CAR de su jurisdicción les delegue tal función**, salvo cuando se trate de la ejecución de obras por parte de éstos.

6.4.2.5.2.3. Ahora bien, con el fin de asegurar el interés colectivo a un ambiente sano y de garantizar la integridad del patrimonio natural de la Nación, el artículo 63 de la Ley en comento, sujeta el ejercicio de las funciones constitucionales y legales en materia ambiental por parte de las entidades territoriales, a los principios de **armonía regional** (*de manera coordinada y armónica, con sujeción a las normas de carácter superior y a las directrices de la Política Nacional Ambiental*), **graduación normativa** (la

expedición de sus normas deben respetar la preeminencia jerárquica de las disposiciones expedidas por órganos superior o de mayor ámbito de comprensión territorial de sus competencias) y de **rigor subsidiario** (*las normas que expidan para la regulación del uso, manejo, aprovechamiento y movilización de los recursos naturales renovables, o para la preservación del medio ambiente natural, podrán hacerse sucesiva y repetidamente más rigurosas, pero no más flexibles*).

6.4.2.5.2.4. Los actos administrativos así expedidos deberán ser motivados y serán apelables ante la autoridad superior, dentro del Sistema Nacional Ambiental y tendrán una vigencia transitoria no superior a 60 días mientras el MINISTERIO DEL MEDIO AMBIENTE decide sobre la conveniencia de prorrogar su vigencia o de darle a la medida carácter permanente y los que expidan las CAR también lo son ante dicho ministerio, en los términos del Código Contencioso Administrativo.

6.4.2.5.3. *De la Competencia de los Departamentos.* Para los fines de esta acción, se precisa establecer la competencia de los departamentos, de los municipios, de los Distritos y del Distrito Capital de Bogotá.

**“ARTICULO 64: Funciones de los Departamentos.** Corresponde a los Departamentos en materia ambiental, además de las funciones que les sean delegadas por la ley o de las que se deleguen a los Gobernadores por el MINISTERIO DEL MEDIO AMBIENTE o por las Corporaciones Autónomas Regionales, las siguientes atribuciones especiales:

- 1) Promover y ejecutar programas y políticas nacionales, regionales y sectoriales en relación con el medio ambiente y los recursos naturales renovables.
- 2) Expedir, con sujeción a las normas superiores, las disposiciones departamentales especiales relacionadas con el medio ambiente.
- 3) Dar apoyo presupuestal, técnico, financiero y administrativo a las Corporaciones Autónomas Regionales, a los municipios y demás entidades territoriales que se creen en el ámbito departamental, en la ejecución de programas y proyectos y en las tareas necesarias para la conservación del medio ambiente y los recursos naturales renovables.
- 4) Ejercer en coordinación con las demás entidades del Sistema Nacional Ambiental (SINA) y con sujeción a la distribución legal de competencias, funciones de control y vigilancia del medio ambiente y los recursos naturales renovables, con

el fin de velar por el cumplimiento de los deberes del Estado y de los particulares en materia ambiental y de proteger el derecho a un medio ambiente sano.

5) Desarrollar, con la asesoría o participación de las Corporaciones Autónomas Regionales programas de cooperación e integración con los entes territoriales equivalentes y limítrofes del país vecino, dirigidos a fomentar la preservación del medio ambiente común y los recursos naturales renovables binacionales.

6) Promover, cofinanciar o ejecutar, en coordinación con los entes directores y organismos ejecutores del Sistema Nacional de Adecuación de Tierras y con las Corporaciones Autónomas Regionales, obras y proyectos de irrigación, drenaje, recuperación de tierras, defensa contra las inundaciones y regulación de cauces o corrientes de agua, para el adecuado manejo y aprovechamiento de cuencas hidrográficas.

7) Coordinar y dirigir, con la asesoría de las Corporaciones Autónomas Regionales, las actividades de control y vigilancia ambientales intermunicipales, que se realicen en el territorio del departamento con el apoyo de la fuerza pública, en relación con la movilización, procesamiento, uso, aprovechamiento y comercialización de los recursos naturales renovables”.

6.4.2.5.4. *De la Competencia de los Municipios y Distritos.* A ellos les compete también realizar las siguientes funciones, algunas de las cuales, para la Sala son de apoyo a la gestión que a las autoridades ambientales les corresponde, sea porque les han sido adscritas directamente, ora por delegación de éstas.

**“ARTICULO 65. *Funciones de los Municipios, de los Distritos y del Distrito Capital de Santa Fe de Bogotá.*** Corresponde en materia ambiental a los municipios, a los distritos con régimen constitucional especial además de las funciones que les sean delegadas por la ley o de las que se deleguen o transfieran a los alcaldes por el MINISTERIO DEL MEDIO AMBIENTE o por las Corporaciones Autónomas Regionales, las siguientes atribuciones especiales:

1) Promover y ejecutar programas y políticas nacionales, regionales y sectoriales en relación con el medio ambiente y los recursos naturales renovables; elaborar los planes, programas y proyectos ambientales municipales articulados a los planes, programas y proyectos regionales, departamentales y nacionales.

2) Dictar con sujeción a las disposiciones legales reglamentarias superiores, las normas necesarias para el control, la preservación y la defensa del patrimonio ecológico del municipio.

3) Adoptar los planes, programas y proyectos de desarrollo ambiental y de los recursos naturales renovables, que hayan sido discutidos y aprobados a nivel regional, conforme a las normas de planificación ambiental de que trata la presente ley.

4) Participar en la elaboración de planes, programas y proyectos de desarrollo ambiental y de los recursos naturales renovables a nivel departamental.

5) Colaborar con las Corporaciones autónomas Regionales, en la elaboración de los planes regionales y en la ejecución de programas, proyectos y tareas necesarios para la conservación del medio ambiente y los recursos naturales renovables.

6) Ejercer, a través del alcalde como primera autoridad de policía con el apoyo de la Policía Nacional y en coordinación con las demás entidades del Sistema Nacional Ambiental (SINA), y con sujeción a la distribución legal de competencias, funciones de control y vigilancia del medio ambiente y los recursos naturales renovables, con el fin de velar por el cumplimiento de los deberes del Estado y de los particulares en materia ambiental y de proteger el derecho a un medio ambiente sano.

7) Coordinar y dirigir, con la asesoría de las Corporaciones Autónomas Regionales, las actividades permanentes de control y vigilancia ambientales, que se realicen en el territorio del municipio o distrito con el apoyo de la fuerza pública, en relación con la movilización, procesamiento, uso, aprovechamiento y comercialización de los recursos naturales renovables o con actividades contaminantes y degradantes de las aguas, el aire o el suelo.

8) Dictar, dentro de los límites establecidos por la ley, los reglamentos y las disposiciones superiores, las normas de ordenamiento territorial del municipio y las regulaciones sobre usos del suelo.

9) Ejecutar obras o proyectos de descontaminación de corrientes o depósitos de aguas afectadas por vertimientos del municipio, así como programas de disposición, eliminación y reciclaje de residuos líquidos y sólidos y de control a las emisiones contaminantes del aire.

10) Promover, cofinanciar o ejecutar, en coordinación con los entes directores y organismos ejecutores del Sistema Nacional de Adecuación de Tierras y con las Corporaciones Autónomas Regionales, obras y proyectos de irrigación, drenaje, recuperación de tierras, defensa contra las inundaciones y regulación de cauces o corrientes de agua, para el adecuado manejo y aprovechamiento de cuencas y microcuencas hidrográficas.

“PARÁGRAFO. Las unidades Municipales de Asistencia Técnica Agropecuaria a Pequeños Productores, Umatas, prestarán el servicio de asistencia técnica y harán transferencia de tecnología en lo relacionado con la defensa del medio ambiente y la protección de los recursos naturales renovables”.

## **6.5. DE LA RESPONSABILIDAD DE LOS DIFERENTES DEMANDADOS EN EL DAÑO DE QUE DAN CUENTA LAS DEMANDAS ACUMULADAS.**

6.5.1. DE LA COMPETENCIA Y DE LA RESPONSABILIDAD DEL MINISTERIO DEL MEDIO AMBIENTE, DEL MINISTERIO DE MINAS Y ENERGÍA Y DE LA CAR POR EL DETERIORO AMBIENTAL. Bastaría resaltar que el daño ambiental al RÍO BOGOTÁ, como a sus afluentes no ocurrió durante los últimos cuarenta (40) años, principalmente durante los últimos veinte (20) años de desarrollo de la región, a LAS ESPALDAS DE LAS AUTORIDADES

AMBIENTALES, quienes a su cargo no sólo han tenido el control de los vertimientos residuales de las aguas industriales como de las domésticas, sino lo que es peor, se sucedió porque en el cumplimiento de sus funciones son ellas las que han contribuido a causarlo, toda vez que no se remite a duda que a su cargo ha estado la expedición de los títulos, licencias ambientales y permisos en los casos que según la ley se requieren. En efecto, se observa que las diferentes autoridades ambientales no han vigilado el cumplimiento de las obligaciones de los estudios de impacto ambiental, o de los planes de manejo, lo cual se deduce en consideración a que la Ley 99 prevé en el artículo 58 que el otorgamiento de los mismos requiere que el peticionario del proyecto, presente un **Diagnóstico Ambiental de Alternativas** ( art. 56, que debe incluir la información sobre la localización y características del entorno geográfico, ambiental y social de las alternativas del proyecto, además de un análisis comparativo de los efectos y riesgos inherentes a la obra o actividad y de las posibles soluciones y medidas de control y mitigación para cada una de las alternativas), y con base en ese diagnóstico, debió elegir (en un plazo no mayor de 60 días) que la autoridad ambiental debe evaluar para seleccionar aquella sobre la que posteriormente aquél debe elaborar el correspondiente Estudio de Impacto Ambiental (art. 57 ), sobre el que la autoridad ambiental fija los términos de referencia en orden a establecer las obligaciones que al titular de la licencia, concesión, o permiso, le corresponderá cumplir para evitar el deterioro y la degradación ambiental. A su turno, es importante resaltar que el **Estudio de Impacto Ambiental**, debe contener la información sobre la localización del proyecto, y de los elementos abióticos, bióticos y socioeconómicos del medio que puedan sufrir deterioro por la ejecución de la respectiva obra o actividad, como también la evaluación de los impactos que puedan llegar a producirse. Además, debe incluir el diseño de los planes de prevención, corrección y compensación de impactos y el plan de manejo ambiental de la obra o actividad para que la autoridad ambiental fije los términos de referencia

del mismo en un plazo que no puede exceder de 60 días hábiles contados a partir de la solicitud.(art. 57).

6.5.1.1. De esa manera, se pregunta el tribunal ¿Cómo fue que si los particulares, a los que se les concedió dichas licencias, o permisos, cumplieron con las obligaciones del estudio de impacto ambiental o planes de manejo, el RÍO BOGOTÁ y sus AFLUENTES se fueron contaminando, sin que las autoridades ambientales como el Ministerio de Minas y Energía lo hubiesen advertido? Se responde, seguramente si sus ojos lo hubieran visto, al desempeñar con diligencia sus funciones de control, ese proceso de degradación, agravado por la sedimentación de lodos, que por la escorrentía de las minas de arena y arcilla, principalmente de las laderas de los CERROS NORORIENTALES le ha hecho perder su condición hidráulica, por ende, su capacidad para autodepurarse de la materia orgánica mediante sus caídas naturales, se hubiese podido detener. Indebida exploración que también es causa del desbordamiento del RÍO TUNJUELO, el que ha perdido su cauce, por lo que nuevamente se hace necesario su redireccionamiento para evitar las inundaciones, que otrora sucedieron en los barrios SAN BENITO y el TUNJUELO, todo lo cual hace imperioso un dragado de los mencionados ríos para mejorar su condición hidráulica, sus caídas, que no sólo impidan los desbordamientos en épocas de caudales fuertes, sino que ayude a su autodepuración en épocas de verano.

6.5.1.2. En efecto, si como se extrae del artículo 59, en concordancia con el 52 de la comentada Ley 99, es el MINISTERIO DEL MEDIO AMBIENTE, quien contando con la información técnica que la CAR debe suministrarle según lo previsto en la referida Ley 99, el que ha tenido la competencia privativa para la expedición de las respectivas licencias ambientales para la ejecución de los **proyectos de gran minería**, no se entiende cómo no ha estado atento para que los beneficiados con tales permisos mineros cumplieren con las obligaciones

que el Estudio de Impacto Ambiental les imponía, permitiendo día tras día, año tras año, la degradación del medio ambiente, que no sólo se contrae a la sedimentación de las fuentes hídricas, sino al impacto ambiental que produce la deforestación en campo abierto, que se agrava con las lluvias y con el viento, como a la vista de todos los habitantes de la región aparece la erosión, lo cual constató la Magistrada Sustanciadora en compañía de los funcionarios del DAMA -16 de septiembre de 2003- (Explotaciones Mineras del Parque Minero Industrial El Mochuelo -localidad de Ciudad Bolívar-; Explotaciones Mineras del Parque Minero Industrial el Tunjuelo -localidades de Usme, Ciudad Bolívar y Tunjuelito-; Explotaciones Mineras del futuro Parque Minero Industrial de Usme -localidad de Usme-; Lavaderos de arena Meissen, -localidad de Tunjuelito-; Ladrilleras en Zona de Suspensión de la actividad minera -localidad de San Cristóbal-) por sobre todo a las alturas de la Cuenca Media Sur y del Municipio de Soacha donde operan los tejares, entre otros la Ladrillera Santafé, en compañía de los técnicos ambientales de la CAR y del alcalde de este municipio como de otros de sus funcionarios, visita en la que se constató el incumplimiento de las obligaciones que prescribe el artículo 6º idém, que a la letra manda: *“En la explotación minera a cielo abierto se exigirá, la restauración o la sustitución morfológica y ambiental de todo el suelo intervenido con la explotación, por cuenta del concesionario o beneficiario del título minero, quien la garantizará con una póliza de cumplimiento o con garantía bancaria”*.

6.5.1.3. A ese respecto, debe hacer notar la Sala que para la revocatoria o suspensión de una licencia ambiental no se requiere del consentimiento expreso o escrito del beneficiario de la misma, cual así lo dispone el artículo 62 de la tantas veces mencionada Ley 99 que prescribe:

*“De la Revocatoria y Suspensión de las Licencias Ambientales. La autoridad ambiental, salvo los casos de emergencia, podrá mediante resolución motivada, sustentada en concepto técnico, revocar o suspender la Licencia Ambiental, los permisos, autorizaciones o concesiones para el uso o el aprovechamiento de los recursos naturales y del medio ambiente, cuandoquiera que las condiciones y exigencias por ella establecidas no se estén cumpliendo conforme a los términos definidos en el acto de su expedición.*

**“La revocatoria o suspensión de una Licencia Ambiental no requerirá consentimiento expreso o escrito del beneficiario de la misma.**

**“La suspensión de obras por razones ambientales, en los casos en que lo autoriza la ley, deberá ser motivada y se ordenará cuando no exista licencia o cuando previa verificación del incumplimiento, no se cumplan los requisitos exigidos en la Licencia Ambiental correspondiente.**

**“Quedan subrogados los artículos 18, 27, 28 y 29 del Decreto Legislativo 2811 de 1974”.**

6.5.1.4. Todas las anteriores circunstancias, ponen de presente también que el MINISTERIO DE MINAS Y ENERGÍA, COMO MINERCOL, EL MINISTERIO DEL MEDIO AMBIENTE, LA CAR CUNDINAMARCA y EL DAMA han violado flagrantemente el artículo 79 de la Carta Superior como las disposiciones de la Ley 99 de 1993, Ley 2 de 1959, artículos 47 y 202 a 210 del Decreto Ley 2811 de 1974 (Código Nacional de recursos Naturales Renovables y de Protección al Medio Ambiente), al no ejercer el correspondiente control, más aún EL MAVDT ha sido indolente con la región por no cumplir con su obligación legal de determinar hasta la fecha, las zonas compatibles con las explotaciones mineras en los cerros Nororientales de la ciudad Bogotá (Bosque Oriental de Bogotá, art. 1º de la Res. 076 de 31 de diciembre de 1977 del Ministerio de Agricultura), como en el municipio de Cogua (Cuenca Alta del Río Bogotá, art. 2 de la precitada Resolución 076), al que también visitó la Magistrada Sustanciadora con el fin de establecer el grado de impacto ambiental en cada municipio de la cuenca alta para los efectos de la discusión y aprobación de los respectivos pactos de cumplimiento y que fue atendida por el respectivo Alcalde quien le puso de presente la necesidad de instaurar una Acción Popular en cuanto las autoridades ambientales no habían adoptado las medidas pertinentes para detener la erosión que por las exploraciones mineras se venían presentando, sin dejar de mencionar las exploraciones mineras en el Municipio de la Calera, que se adelantan en el territorio de jurisdicción ambiental del DAMA.

6.5.1.5. Sobre concesiones mineras en dichas zonas, que otrora se consagraron como compatibles a la luz de la Ley 99 de 1993 (*art.61*), pero

que según el artículo 36 de la Ley 685 de 15 de agosto de 2001 se entienden excluidas (en razón a la declaratoria de inexequibilidad de la frase “**de conformidad con los artículos anteriores**” del aludido artículo 36, con lo cual el compás se abrió para otras no señaladas en la norma), dan cuenta los Contratos de Concesión para la explotación de materiales de construcción otorgados por el Ministerio de Minas y Energía Nos. 16.569, 16.715 y 15148 que corresponden a áreas ambientalmente protegidas del Municipio de la Calera y del Nororiente de Bogotá D.C., respecto de los cuales dicho ministerio expidió los títulos mineros Nos. 5-0001, 5-0006 de 4 y 7 de enero de 1993 respectivamente y las Nos. 5-1154 y 5-1979 de 10 de marzo y 2 de abril del mismo año (la vigencia de la Ley 99 es de 22 de diciembre de 1993, por lo que a partir de ésta la expedición de las licencias, como se anotó, es competencia privativa de MAVDT)<sup>4</sup>.

6.5.1.6. Por lo anterior, y en orden a salvaguardar los derechos colectivos invocados, la Sala estima necesario que el MINISTERIO DE MINAS Y ENERGÍA Y EL MINISTERIO DE AMBIENTE Y DESARROLLO TERRITORIAL, quien actualmente tiene la competencia privativa en la materia que se acaba de exponer, deben proceder en forma inmediata a revisar los aludidos títulos mineros (La CAR en los casos que de acuerdo con su competencia haya otorgado licencias), porque frente al interés general cuando es el medio ambiente el que está en juego, como recurso sostenible y patrimonio inalienable de la Nación por cuya protección debe propender el Estado, no puede serle oponible la teoría de los derechos adquiridos, en últimas, una vez se dilucide la situación legal de tales contratos, tales autoridades **deben proceder en forma inmediata a exigir el cumplimiento de las obligaciones que el Estudio de Impacto Ambiental, o Planes de Manejo** hubiesen

---

<sup>4</sup> Consejo de Estado, Acción de Cumplimiento; Exp. 2500-23-27-000-2001 90561-01, Actor: Carlos Eduardo Almaciga Martínez.; Demandado: Nación-Ministerio de Minas y Energía Sent. 28 06 de 2003; Mag.. Pon: Dr. Manuel S.Urueta Ayola.

Tribunal Administrativo de Cundinamarca; Acción de Cumplimiento; Exp. 01-561; sent. 31 de 2003; Accionante: Carlos Eduardo Almaciga Martínez; Accionado: Ministerio de Minas y Energía.

determinado como necesarias para la protección del medio ambiente, para que la zona objeto de exploración y explotación de los recursos naturales recobre su biodiversidad en las condiciones que garanticen un concepto integral de desarrollo sostenible, por sobre todo, evitar la escorrentía de las laderas, cerros y montañas hacia las fuentes hídricas. Aquí cabe mencionar que el apoderado del MAVDT en su escrito de alegatos de conclusión menciona como una de las “*Principales Actividades Realizadas por el Ministerio En El Giro de Sus Competencias*”, el **proyecto Organización de información y Sistematización de Información para el Registro de la Reserva Forestal Protectora-Productora ‘Cuenca alta del río Bogotá’, por valor de \$332.000.000**” (fl. 4848, c. 8 del c.p1.). Lo que pone de presente que existe una información sistematizada para ubicar cuáles permisos o títulos mineros deben suspenderse por el incumplimiento de las obligaciones a que se acaba de hacer referencia, en orden al cabal cumplimiento de lo aquí dispuesto. **En el término máximo de seis meses contados a partir de la notificación de la sentencia el Tribunal constatará el cumplimiento de esta orden.**

6.5.1.7. Sobre dicho problema ambiental, cabe precisar que las autoridades ambientales como también los concesionarios de los permisos mineros deben acatar el presente mandato imperativo legal: “*La propiedad estatal de los recursos naturales no renovables es inalienable e imprescriptible. El derecho a explorarlos y a explotarlos sólo se adquiere mediante el otorgamiento de los títulos enumerados en el artículo 14 de este Código. Ninguna actividad de prospección, exploración o explotación o de posesión material de dichos recursos, sea cual fuere su antigüedad, duración o características, conferirá derecho o prelación alguna para adquirir el título minero o para oponerse a propuestas de terceros*” (Lo subrayado es de la Sala).

6.5.1.8. De otra parte, no puede echarse de menos que el artículo 61 de la Ley 99 es una de las herramientas primordiales en la protección del

medio ambiente de la Sabana de Bogotá, cuando preceptúa: *“Declárase la Sabana de Bogotá, sus páramos, aguas, valles aledaños, cerros circundantes y sistemas montañosos como de interés ecológico nacional, cuya destinación prioritaria será la agropecuaria y forestal. El MINISTERIO DEL MEDIO AMBIENTE determinará las zonas en las cuales exista compatibilidad con las explotaciones mineras; con base en esta determinación, la Corporación Autónoma Regional de Cundinamarca (CAR), otorgará o negará las correspondientes licencias ambientales.*

6.5.1.8.1. Dicha norma en su inciso final prevé que los municipios y el Distrito capital, deben expedir la reglamentación de los usos del suelo, teniendo en cuenta las disposiciones que se señalan en la misma, como también las que a nivel nacional expida el Ministerio del Medio Ambiente.

6.5.1.9. Por ello, atendiendo a que dentro de las funciones que al MINISTERIO DE MINAS Y ENERGÍA le corresponden, según el artículo 3° del Decreto 070 de 2001 -que invoca en su escrito de alegatos de conclusión (fls. 4607 a 4620, c.8p), se encuentran la de *“propender a que las actividades que desarrollen las empresas del sector minero-energético garanticen el desarrollo sostenible de los recursos naturales”* (No. 2°), por lo cual le compete también la de *“adoptar los reglamentos y hacer cumplir las disposiciones constitucionales, legales y reglamentarias relacionadas con la exploración, explotación, transporte, refinación, distribución, procesamiento, beneficio, comercialización y exportación de recursos naturales no renovables, y las normas técnicas relativas a los servicios públicos domiciliarios de energía eléctrica y gas combustible, en los términos previstos en las normas legales vigentes”* (No. 4°), **el ministro del ramo como el del MAVDT** para solucionar los problemas ambientales que generan las exploraciones mineras, deberán reglamentar las zonas que de acuerdo con lo prescrito en la Ley 685 de 2001 son de *“Reserva Forestal de la Sabana”*, donde no se admite la exploración y explotación de las minas, debiendo, en consecuencia, proceder a revisar y cancelar los correspondientes permisos o títulos

mineros otorgados en las zonas de reserva de la Sabana de Bogotá, como también aquellos que se han concedido en lugares donde de manera restringida se pueden adelantar para exigir el cumplimiento de las obligaciones de reforestación y demás trabajos en orden a evitar la escorrentía de los cerros y laderas y en procura de darle cumplimiento a la previsión del artículo 80 constitucional que les ordena no sólo el deber de planificar, prevenir, controlar y sancionar, sino por sobre todo una vez ocurridos los desastres ambientales, **“exigir la reparación de los daños causados”**.

6.5.2. DE LA COMPETENCIA Y DE LA RESPONSABILIDAD DE LOS DEMÁS MINISTERIOS EN MATERIA AMBIENTAL. Pasando a la actividad que deben desplegar los demás ministerios en torno al problema ambiental del RÍO BOGOTA y de sus afluentes, que se refiere, según la enumeración que hace el artículo 5° de la Ley 99, al cumplimiento de las funciones transcritas en el punto 6.4.2.4.1. y que apuntan hacia la adopción de políticas de control de crecimiento demográfico de la población de la cuenca del río y sus afluentes en lo que al MINISTERIO DE SALUD le concierne, al control de asentamientos humanos y de expansión urbana que se radica en el MAVDT (entre los cuales pueden incluirse los programas de inversión del sector productivo de la cuenca en orden a la consecución de préstamos que le permitan alcanzar las metas de los proyectos de producción más limpia implementados por la CAR y por el DAMA), así también hacia la incorporación de los planes, programas y proyectos ambientales en el Plan Nacional de Inversiones por parte del Gobierno, quien debe someterlos a consideración del Congreso, para lo cual el DEPARTAMENTO NACIONAL DE PLANEACIÓN debe prestar la correspondiente asesoría al MAVDT en su preparación, de igual manera, hacia la adopción de los planes y programas docentes y su inclusión en el pénsum en los distintos niveles de educación por parte del MINISTERIO DE EDUCACIÓN, políticas todas que, en fin, comprenden el cumplimiento de la obligación constitucional de realizar

oportunamente las transferencias de los recursos a las entidades territoriales para el desarrollo de los planes de inversión ambiental -entre otros los del Fondo Nacional de Regalías por parte del MINISTERIO DE HACIENDA-FONDO NACIONAL DE REGALÍAS, precepto superior, que según la afirmación de algunos municipios y del Distrito Capital, está siendo desacatado por que se les adeuda las de varios años, no obstante a que dicen haberlas solicitado oportunamente.

6.5.2.1. Lo acabado de exponer conduce a la Sala a disponer que **los ministros del ramo deben proceder a encaminar los programas relacionados con las funciones acabadas de mencionar, de una manera coordinada con la MINISTRA DEL MEDIO AMBIENTE, en orden, también, a procurar un ahorro de recursos humanos, tecnológicos y financieros, evitando la toma de un sin número de proyectos que por la falta de engranaje dan lugar a la dispersidad de medidas y a un choque de las mismas creando incertidumbre entre quienes deben controlarlas, ejecutarlas y cumplirlas.**

6.5.3. DE LA COMPETENCIA Y DE LA RESPONSABILIDAD DEL IDEAM EN LA MATERIA AMBIENTAL. De otro lado, no se remite a duda la importancia de las funciones que cumple el IDEAM para el cabal cumplimiento de los fines que determinaron la necesidad de acumular los diferentes procesos en procura de la descontaminación del río, instituto al que le corresponde monitorear y evaluar los resultados que se vayan obteniendo sobre la descontaminación del RÍO BOGOTÁ y sus afluentes que también son objeto de la presente acción, mediante la modernización y ampliación de la red Hidrometeorológica para que de acuerdo con la propuesta de Pacto de Cumplimiento presentada por la CAR, la cual aquél se propone actualizar, sea una sola para todas las entidades, como también lo sea la instalación de las estaciones telemétricas con el fin de evitar desastres, función esta que también puede cumplir, si se tiene en cuenta que le corresponde la de “*hacer el*

*seguimiento de los recursos biofísicos de la Nación, especialmente en lo referente a su contaminación y degradación”, según lo previsto en el inciso 3º del artículo 17 de la consabida Ley 99.*

6.5.3.1. A ese respecto, la Sala estima que todas las entidades involucradas en el control de vertimientos deben conformar una sola RED HIDROMETEOROLÓGICA direccionada por el IDEAM y alimentada por la CAR y EL DAMA en donde se registre toda la información pertinente, por lo que también una SOLA ESTACIÓN DE MONITOREO es la que deben implementar todas ellas, señalando los sitios puntuales de medición del efluente, como también en las PTAR construidas por la CAR y por los municipios, con el fin de optimizar los recursos que cada uno de ellos tienen presupuestados para el efecto, dando así cumplimiento a los mandatos imperativos de la Ley 99 de 1993, cual es la coordinación en la programación y ejecución de las metas ambientales y la cooperación en la ejecución de los misma.

6.5.4. DE LA COMPETENCIA EN MATERIA AMBIENTAL Y DE LA RESPONSABILIDAD DE LOS MUNICIPIOS POR EL DETERIORO AMBIENTAL DEL RÍO BOGOTÁ Y SUS AFLUENTES. Igualmente, cabe resaltar la importancia de los municipios en el cumplimiento de la función de colaboración a la CAR para la ejecución de los planes y programas para la conservación y recuperación del medio ambiente, como también el control policivo sobre la materia, esto es a los vertimientos de aguas residuales de las industrias (lácteos, cárnicos, lavaderos de carros, floricultura , etc, que se adelantan como empresa casera, por lo que resultan menos controladas que la gran industria, pero que aun en pequeña escala causan gran impacto ambiental en atención a su número) que se ubican en su territorio y por sobre todo la falta de ejecución de gran parte o de todo el Plan Maestro de Alcantarillado para evitar los vertimientos domésticos como industriales en forma directa a las corrientes de agua, sin que previamente sean tratados, no obstante que

han dispuesto de recursos como los que se mencionan en esta providencia.

6.5.4.1. A ese respecto, debe resaltarse que algunos municipios como se extrae de sus Propuestas de Pacto de Cumplimiento ni si quiera se han preocupado por radicar ante el DEPARTAMENTO DE CUNDINAMARCA los proyectos ambientales como los demás planes de inversión en la materia, con el fin de que este le preste la debida asesoría técnica y de consecución de recursos para su cabal ejecución, acudiendo al mecanismo de la cofinanciación, función que la ley le adscribe a éste, los que en consideración al monto de la inversión requieren también de la ayuda económica no sólo del departamento, sino de la CAR, de ser posible en atención a sus presupuestos.

6.5.4.2. Es de verse como, en el documento de pacto de cumplimiento que presenta la EEB y EMGESA S.A. E.S.P., éstas ponen de presente la transferencia de cuantiosas sumas a los municipios y a la CAR, en cumplimiento del artículo 45 de la Ley 99 de 1993, las cuales han debido ser destinadas a la protección del medio ambiente y a la defensa de la cuenca hidrográfica y del área de influencia del proyecto, que para el año 2002 ascendieron a la suma de TREINTA Y CINCO MIL MILLONES DE PESOS. Por ello, EMGESA S.A. E.S.P. considera, dentro del marco de las disposiciones legales vigentes, que tanto los municipios beneficiarios de las transferencias como la CAR deben utilizar tales recursos para el mejoramiento de las aguas del Río Bogotá y coadyuvar en la mitigación de los impactos de sus aguas en el Embalse del Muña.

6.5.4.3. De la misma manera, se informa que la EEB adicionalmente transfirió a los municipios y a la CAR, en cumplimiento del referido artículo 45 cerca de TREINTA Y SIETE MIL MILLONES DE PESOS DESDE EL AÑO 1994 al 1997.

6.5.4.3.1. Esas transferencia, resalta la Sala, deben destinarse exclusivamente al recurso hídrico que contribuye a la generación de energía, o al embalse de donde se genera y del área de influencia, según se prevé en el numeral 1º del inciso 1º del artículo 45 de la Ley 99 de 1998.

6.5.4.4. Sobre la ejecución de tales recursos, se pregunta el tribunal dónde esta la inversión, ¿cuál es el control que se ha ejercido por las Contralorías Departamentales como la Nacional a dichos dineros?, máxime que se observa que los Planes Maestros de Acueducto y Alcantarillado apenas comienzan con los estudios de diseño por algunos municipios como se verá, amén de que la contaminación del RÍO BOGOTÁ cada día se ha venido agravando. ¿Qué ha hecho la CAR con esos recursos?, que proviniendo del sector eléctrico y no siendo éste el directo causante de los vertimientos, han debido destinarse precisamente para la descontaminación del RÍO BOGOTÁ y no a otros planes donde fácilmente y a la vista de las autoridades controladoras se invierten sin examinarse su prioridad.

6.5.4.5. Para los efectos de las órdenes a impartir en esta sentencia debe mencionarse también que en cumplimiento de la citada ley, EMGESA S.A. E.S.P. expresa que continuará transfiriendo, mientras se encuentre en operación el Embalse del Muña y sus centrales de generación, (y las disposiciones legales vigentes así lo prevean) una suma aproximada de DOSCIENTOS MIL MILLONES DE PESOS en los próximos 15 años, además de los valores que por impuestos debe pagar, entre otros, al MUNICIPIO DE SIBATÉ y a la NACIÓN, tal y cual así lo informa al tribunal en su escrito de pacto de cumplimiento, en el que señala que de estas cifras se podrían destinar partidas para la operación y mantenimiento de las obras propuestas por EEB – EMGESA (véase

cuadro No. 4 y 5, transferencias de EMGESA esa a municipios río Bogotá y a la CAR por Ley 99 de 1993).

6.5.5. DE LA COMPETENCIA EN MATERIA AMBIENTAL Y DE LA RESPONSABILIDAD DEL DEPARTAMENTO DE CUNDINAMARCA EN LA DESCONTAMINACIÓN DEL RÍO BOGOTÁ Y SUS AFLUENTES. Igual comentario merece la intervención del departamento en la tarea ambiental que como ente territorial le corresponde frente a los municipios, brindándoles el apoyo presupuestal, técnico, financiero y administrativo a éstos como a la CAR, especialmente en lo que se refiere a la coordinación de las actividades de control y vigilancia ambientales intermunicipales a realizarse dentro de su territorio.

6.5.6. DENTRO DE UN MARCO REGIONAL LA DESCONTAMINACIÓN DEL RÍO BOGOTÁ ES RESPONSABILIDAD DE TODOS LOS ENTES TERRITORIALES INVOLUCRADOS Y DE LOS ÓRGANOS AMBIENTALES Y NO ES SOLA TAREA DEL DISTRITO CAPITAL DE BOGOTÁ. Así las cosas, partiendo del hecho notorio de la contaminación de las quebradas y ríos a donde los municipios como el Distrito Capital vierten sus aguas residuales, es evidente que todos los entes públicos acabados de mencionar son responsables por omisión al no asumir de manera diligente el cumplimiento de las funciones que constitucional y legalmente les han sido asignadas, pues en la ejecución de algunas de ellas se advierte una falta de coordinación en la programación, una falta de permanencia en el cumplimiento de la función de control y vigilancia de los recursos naturales que no sólo son de dominio de la NACIÓN sino que son bienes intangibles del mundo entero como que el derecho a gozar de un ambiente sano no está delimitado por un territorio, sino que traspasa las fronteras, razón última de la exigencia constitucional de la eficiencia y de la eficacia en el ejercicio de la función pública.

6.5.6.1. Así, la primera, la **eficiencia**, exige en el administrador de bienes públicos que su actividad la desempeñe con vehemencia, con energía y en forma virtuosa; la segunda, la **eficacia**, conlleva al logro de la conducta prescrita por el orden jurídico, que implica, en el subexamine, la efectiva aplicación de las sanciones por los órganos encargados de imponerlas, en los casos en que se transgrede el orden jurídico, en la medida en que éste sólo es válido cuando es eficaz y para que lo sea, quienes tienen a su cargo la función de hacerlo cumplir y respetar, **deben actuar no solo coordinadamente sino con la diligencia y esmero que a un buen padre de familia se le exige cuando del cuidado de sus hijos se trata, para el caso, deben resaltar la Sala, el patrimonio de la Nación es el de todos los colombianos** por lo que merece de una especial protección no solo por los particulares sino con mayor razón por los funcionarios que administran sus bienes tangibles como intangibles, **por lo que se requiere de la intervención del juez de una manera equitativa y no para hacer prevalecer sus decisiones, que más con el ánimo de resaltar su función las han cubierto de un ropaje inapropiado al que comúnmente se le conoce como el gobierno de los jueces, todas las cuales por sobre todo obedecen al afán de direccionar la moralidad administrativa para poder dar a cada quien lo que le corresponde en un Estado Social de Derecho, como lo pregonan la Carta Superior.**

6.5.6.2. Merece recordar que los deberes incumplidos por parte de todas las entidades públicas tienen su ancestro en el artículo 80 de la Carta Superior que consagra el principio de la planificación para el aprovechamiento de los recursos naturales, así:

“Art. 80.- El Estado planificará el manejo y aprovechamiento de los recursos naturales, para garantizar su desarrollo sostenible, su conservación, restauración o sustitución.

**“Además, deberá prevenir y controlar los factores de deterioro ambiental, imponer las sanciones legales y exigir la reparación de los daños causados.**

**“Así mismo, cooperará con otras naciones en la protección de los ecosistemas situados en las zonas fronterizas”.**

6.5.6.3 Así mismo, debe resaltarse sobre la falta de una política coordinada de crecimiento poblacional y de asentamientos humanos en el Distrito Capital, que desde años atrás ha debido ser una de las tareas fundamentales de los MINISTERIOS DE AGRICULTURA y de AMBIENTE VIVIENDA Y DESARROLLO TERRITORIAL, pues es evidente que la violencia rampante de los grupos armados en los sitios apartados de la geografía nacional, es el único factor que ha propiciado el desplazamiento hacia la Capital de la República, donde las víctimas de esa guerra interna entre paramilitares y guerrilleros, los ha obligado a abandonar sus tierras despojados de todos o de los pocos bienes con que contaban, conflicto que para solucionarlo ha sido insuficiente la intervención de las armas del aparato militar estatal como de los diálogos de paz. Para solucionar ese grave problema de la Nación, recaba la Sala que no basta la ayuda humanitaria que la Nación presta a la población desplazada, sino que se hace necesario la canalización de una mayor inversión de ésta hacia el Distrito Capital de Bogotá, en consideración al alto costo que implica la infraestructura para la prestación de los servicios públicos domiciliarios por encima de una cota que oscila entre los 2.400 y 3000 metros, cuya falta ha conducido a que las aguas residuales se viertan directamente sobre los cuerpos hídricos, fuera de las demás responsabilidades que en materia de salud, educación y trabajo debe asumir en orden a que no sea el desplazamiento la causa que propicie las asociaciones para delinquir en desmedro del resto de la población.

6.5.6.4. Aquí cabe poner de presente a las diferentes autoridades involucradas en la solución de los conflictos a la población desplazada como a todas aquellas personas con necesidades básicas insatisfechas, las

órdenes que se impartieron a la BENEFICIENCIA DE CUNDINAMARCA en la sentencia de 21 de junio anterior, proferida por esta Sección dentro de la Acción Popular No. 01-369, con ponencia de la magistrada que preside hoy esta Sala de Decisión, decisiones que contribuyen a alcanzar los objetivos de este proceso, por lo que a dicho ente se le impartirán las prevenciones para que cumpla las órdenes allí impartidas, en especial para los sectores de la producción de las curtiembres menos favorecidas en orden a la consecución de los recursos que les permitan construir la planta de tratamiento para la recirculación del cromo y la de pelambre de los cueros, en caso de considerarse necesario por las autoridades ambientales a falta de otros planes de manejo ambiental en cada una de las industrias involucradas.

*6.5.6.5. BOGOTÁ COMO DISTRITO CAPITAL, EN ESPECIAL, QUE SUFRE EL PROBLEMA DE DESPLAZAMIENTO A MAYOR ESCALA, PIDE A GRITOS A LA NACIÓN Y LAS ENTIDADES DEL ORDEN NACIONAL QUE NO LO DEJEN SOLO, ASÍ CONTINUAMENTE LO EXPUSO EL DISTRITO CAPITAL Y SUS ENTIDADES DESCENTRALIZADAS EN LAS DIFERENTES MESAS DE TRABAJO COMO EN SU PACTO DE CUMPLIMIENTO*, en contraprestación a que es el ente territorial que en primer lugar con sus impuestos contribuye a los gastos de la Nación.

**6.5.7. DE LA FALTA DE CONTROL FISCAL Y DISCIPLINARIO.** Puestas en ese estadio las cosas, se concluye que las funciones que a los diferentes entes les competía ejercer en materia ambiental se han desarrollado desatendiendo los principios constitucionales plasmados en el artículo 209 (ver punto 6.5.6.1.) como rectores de la buena función administrativa, por lo que se avizora también la falta de eficiencia en el Control Fiscal en cuanto el ente encargado de ejercerlo no ha desplegado el **control de resultado** de la administración en la materia ambiental, tal y cual así se lo ha impuesto la Constitución Nacional (art. 119). Es por ello, que se impartirán las correspondientes órdenes a los órganos de

control fiscal del Distrito Capital y Departamental, como a la Contraloría General de la República para que procedan a revisar cómo se han ejecutado dichos recursos y por sobre todo en qué y cómo se van a invertir, para así garantizar los objetivos de este proceso, de tal manera que en adelante realicen una vigilancia permanente en el gasto de las obras que se indican en los diferentes pactos de cumplimiento que registraron los entes públicos, como también sobre los que serán objeto de su presupuesto para dar cumplimiento a las órdenes y condenas que para el efecto se deben impartir, debiendo entregar un informe de los resultados de dicho control al Tribunal a medida que se construyan las obras y se realicen las inversiones.

6.5.7.1. Puestas de presentes las anteriores circunstancias que han contribuido en la agravación del conflicto ambiental, el tribunal debe advertirle a todas las instituciones públicas convocadas, que la falta de gestión en el cumplimiento de lo pactado como de las órdenes que en este fallo se impartan con el fin de **RESTITUIR EL PATRIMONIO AMBIENTAL DE LA NACIÓN, LAS HARÁ RESPONSABLES FISCALMENTE** si se llega a establecer que continúan dispersando sus recursos hacia otras tareas que evidentemente no son más importantes que la **DESCONTAMINACIÓN DEL RÍO BOGOTÁ**, de la que va de la mano a toda carrera la de todos los demás ríos y quebradas de las tres cuencas.

6.5.8. **DE LA AUTORIZACIÓN POR LA MESA REGIONAL PARA ADELANTAR NUEVAS INVESTIGACIONES Y ESTUDIOS.** Cabe observar que la dispersión de recursos propicia el desorden en la información, por lo que también los programas que en adelante se desarrollen en materia de investigación deben propender hacia la constatación de las metas propuestas en los diferentes pactos de cumplimiento que fueron analizados y aprobados a la luz de todos los llamados a intervenir en esta acción en cada una de las mesas de trabajo,

como en las audiencias en que fueron presentados, principalmente conforme con el acuerdo a que se llegó con cada uno de los técnicos que representaron al MINISTERIO DEL MEDIO AMBIENTE, a la CAR, al DAMA, al DEPARTAMENTO DE CUNDINAMARCA, a EMGESA, a la EEB, a la EAAB, a la que asistió en representación de los accionantes de los procesos acumulados el doctor JORGE ENRIQUE CUERVO RAMÍREZ, el ingeniero ambiental para ante el Procurador Tercero ante el Tribunal que viene actuando, y que fue presidida por la Magistrada Sustanciadora.

6.5.8.1. Así las cosas, los recursos de las diferentes entidades que deben ser destinados para tales fines, deben ir a un Fondo Común, para así evitar que se postergue la descontaminación del río y sus afluentes so pretexto de seguir adelantándose nuevos estudios en los que durante todos los años anteriores se han dispersado, como ha sido lo acostumbrado. Será la Mesa Regional de la Cuenca la que aprobará cuándo y sobre qué aspectos se requieren adelantar nuevos estudios y a cargo de qué entidad o entidades correrá su costo, que se presentarán al tribunal para con la asesoría técnica del Auditor de Cuenca que para el efecto se designará, previo concepto favorable de la Procuraduría Delegada Para el Medio Ambiente, procederá a definir sobre la necesidad de adelantarlos.

6.5.8.2. De esa manera, sólo cuando el tribunal con la aprobación de la MESA REGIONAL DE LA CUENCA del RÍO BOGOTÁ, autorice nuevas investigaciones y estudios que demuestren en forma fehaciente que la tecnología impone el desarrollo de otras obras que contribuyan en forma más acelerada a restaurar el medio ambiente con igual monto de inversión que el que en este proceso han puesto de presente cada uno de los entes públicos, ora superior, pero que en todo caso comprenda un mayor beneficio (relación costo-beneficio) y que por sobre todo implique una sola inversión en la que cada uno de los entes que participen en ella

puedan obtener sus mejores logros y beneficios, podrá haber lugar a la modificación de los pactos aquí propuestos. Sin embargo, el avance de la tecnología no podrá servir de pretexto para justificar la inejecución de las obras propuestas, puesto que no será sobre la marcha de su realización que se pida la autorización para la modificación a las mismas.

6.5.8.3. Aquí cabe resaltar que el juez constitucional está facultado para adoptar todas las medidas necesarias para volver las cosas a su estado anterior, en cuanto no sólo ha sido la falta de vigilancia y la concesión de licencias incontroladas las que han llevado a ese caos, sino la misma dispersión de recursos, como también la falta de integración y coordinación de todas las entidades públicas involucradas las causas principales de la degradación del medio ambiente, como insistentemente se ha señalado a lo largo de esta sentencia. Luego si para restablecer el orden se ha requerido de la judicialización del conflicto como último recurso de que gozan los particulares, como también las propias autoridades que no han sido responsables de su causación<sup>5</sup>, es este órgano el que debe propender por la restauración del ecosistema, que no obstante la existencia de unas normas que consagran su protección, ha sido degradado por una gestión ineficiente de aquellos que estaban obligados a hacerlo respetar. Esto, por cuanto ha pasado muchos años sin que los objetivos trazados en cada institución los hubiesen alcanzado, sea por la ineficiencia de algunas de ellas, ora porque no ha existido un acuerdo de todas y un propósito único, fuera de su desinterés en el aporte de recursos (en este aspecto unas a otras, en términos jocosos, se devuelven el balón sin que el partido termine), daño del que cada una, como se ha visto en todos sus escritos no se sienten culpables, por ende responsables, no obstante a que por la gestión cumplida en las diferentes mesas de trabajo hoy son concientes que **ES LA ÚNICA OPORTUNIDAD QUE TIENEN PARA NO ESTAR SOLAS EN LA SOLUCIÓN DEL CONFLICTO.**

---

<sup>5</sup> Eduardo García sarmiento, Práctica Civil, Librería Jurídicas Wilches, 5 edic. T.I, “El estado por intermedio del juez, ante el ejercicio de la acción, tiene el deber de prestar ña jurisdicción; esto es, debe tutelar el derecho cuya protección se le exige”.

6.5.8.4. En efecto, es indubitable que siendo una meta difícil de alcanzar LA DESCONTAMINACIÓN DEL RÍO se requiere que todos los entes públicos vinculados como también todas las industrias privadas demandadas, como las que no fueron vinculadas al proceso, en fin todos los habitantes de la cuenca, al tener una cuota de responsabilidad en el grave daño ambiental, sean los llamados a asumir los costos para la restauración de las cosas a su estado anterior en cuanto fuere posible (art. 2º Ley 472 de 1998), en orden a que no se siga afirmando como se extrae del proceso y de los diferentes debates públicos, **QUE EL RÍO ESTÁ MUERTO Y LO QUE SE LLEGUE A INVERTIR ES PLATA PERDIDA, DESCONOCIENDO LA EXISTENCIA DE ESTE PROCESO Y LO QUE ES PEOR EL COMPROMISO DE TODOS LOS INVOLUCRADOS, INSISTIENDO ACERCA DE LA DESFINANCIACIÓN PARA LA DESCONTAMINACIÓN DEL RIO, CUYA DEFINICION CORRESPONDE AL JUEZ CONSTITUCIONAL EN ORDEN A SALVAGUARDAR LOS DERECHOS COLECTIVOS CONCULCADOS CON SU ACTUAR OMISIVO, PARA ASI JUSTIFICAR LA INVERSIÓN EN OTRAS OBRAS QUE SI BIEN SON NECESARIAS NO SON PRIORITARIAS FRENTE A UNA CATÁSTROFE ECOLÓGICA QUE A LA VISTA DE TODO EL MUNDO EXHIBE EL RÍO, COMO SI FUERA SOLO PROBLEMA DEL DISTRITO CAPITAL** (en el que éste hasta ahora no ha puesto la cuota que le corresponde, como quiera que se ha dado primacía a la ejecución de otras obras que si bien son de interés general y social no son de la prioridad como la que reviste la agonía de un recurso natural) **Y NO UN PROBLEMA REGIONAL Y NACIONAL, QUE MUESTRA LA INDOLENCIA DE LOS PARTICULARES Y DE LAS AUTORIDADES, COMO SI SOLO UNOS FUERAN RESPONSABLES Y OTROS NO,** siendo las mismas autoridades ambientales las que aún estando a las puertas de esta sentencia parece que no se han percatado de todos los estudios que se les

han presentado en orden a una solución única al problema del río (como en sus alegatos de conclusión lo expone la CAR al decir que no conoce los estudios de dragado y de disposición de lodos y demás aspectos técnicos que fueron objeto de examen en la mesa de Solución Técnica Integral en la que participaron sus expertos como los del Ministerio del Medio Ambiente los que con seguridad deben haber presentado en orden a la consecución de las licencias que de cada uno de estos entes deben obtener y que por sobretodo no desconoce la necesidad del dragado como de la ampliación de la PTAR SALITRE y la de CANOAS que ha de reemplazar las que inicialmente estaban proyectadas en el estudio de la EPAM a la altura de los RIOS FUCHA Y TUNJUELO. No sobra mencionar que este estudio también contemplaba la alternativa que se acordó por la Mesa de Solución Técnica Integral celebrada dentro de este proceso y que es el que se acoge en esta sentencia), sin que por su parte hubiesen presentado otras pruebas, más que sus solas afirmaciones, asumiendo una actitud cómoda frente a las documentales presentadas por los diferentes demandados a quienes se les atribuyen los vertimientos, como si por el sólo hecho de tener esa calidad de autoridades ambientales estuviesen relevadas de la carga de probar, la cual se compendia en el siguiente principio latino: **“ONUS PROBANDI INCUMBIT ACTORIS. ACTORIS NON PROBANDUS REUS ABSOLVITUR”**, que se contrae también a la prueba de los hechos y que se resume en la siguiente frase: **“DADME LA PRUEBA Y TE DARÉ EL DERECHO”**, TODO LO CUAL COMPORTA EL DEBER DE PROBAR SUS AFIRMACIONES O LAS EXCEPCIONES EN QUE SE SOPORTAN AQUELLOS, según el mandato del artículo 177 del Código de Procedimiento Civil en concordancia con el 174 ídem, **CARGA QUE DE SU PARTE BRILLA POR SU AUSENCIA EN EL PROCESO**, como que sólo se ha limitado a desestimar todos los estudios científicos que han sido puestos a su consideración como autoridad ambiental y que como pruebas a contradecir por su parte ha debido allegar al proceso las que tiendan a la demostración de sus afirmaciones, porque, se insiste, la condición de autoridad ambiental, no la exime de la carga de probar en cuanto es principio de derecho procesal y de orden público LA

IGUALDAD DE LAS PARTES, que es un deber por cuyo respeto el juez debe velar.

6.5.9. DE LA RESPONSABILIDAD POR SOBRE TODO DE LOS PARTICULARES. Se parte aquí de uno de los principios o pilares fundamentales del ordenamiento jurídico nacional, plasmado en el artículo 8 de la Constitución Nacional:

**“ART. 8°. “ES OBLIGACIÓN DEL ESTADO Y DE LAS PERSONAS PROTEGER LAS RIQUEZAS CULTURALES Y NATURALES DE LA NACIÓN”.**

6.5.9.1. Este deber de proteger las riquezas de nuestra Nación se reitera en el numeral 8 del artículo 95 de la Carta Política, norma que señala los deberes del ciudadano, dentro de los cuales, para los efectos de la salvaguarda de los derechos que aquí se invocan como violados, se destacan los siguientes:

**“Art. 95. La calidad de colombiano enaltece a todos los miembros de la comunidad nacional. Todos están en el deber de engrandecerla y dignificarla. El ejercicio de los derechos y libertades reconocidos en esta Constitución implica responsabilidades.**

**“Toda persona está obligada a cumplir la Constitución y las leyes.**

**“Son deberes de la persona y del ciudadano:**

- 1. Respetar los derechos ajenos y no abusar de los propios.**
- 2. Obrar conforme al principio de solidaridad social, respondiendo con acciones humanitarias ante situaciones que pongan en peligro la vida o la salud de las personas.**

**“(...**

**“8. Proteger los recursos culturales y naturales del país y velar por la conservación de un ambiente sano.**

**“9. Contribuir al financiamiento de los gastos e inversiones del Estado dentro de conceptos de justicia y equidad”.**

6.5.9.2. Por todo eso y en consideración a la consagración del Derecho Colectivo de todas las personas a gozar de un ambiente sano (del que en la mayoría de los casos los particulares han abusado de su posición dominante al explotar los recursos naturales a la vista de todas las autoridades, sin que se les haya

exigido el respeto por el entorno natural que es propiedad de todos, como que todos tienen derecho a gozar de un ambiente sano), se abrió paso al ejercicio de las Acciones Populares para protegerlo, y es por lo que frente al derecho de cada persona (**mi derecho**) el límite para su ejercicio lo constituye el derecho de los demás.

6.5.9.3. En ese orden, todos los particulares (incluyendo a quienes somos partes de la Rama Judicial) son responsables de los vertimientos tales como metales, plaguicidas, grasas, detergentes que directamente, o por conducto de los alcantarillados van a los recursos hídricos, sin que hasta la presente hayan sido conscientes que antes que el Estado, son los primeros responsables en el cumplimiento de las obligaciones ambientales.

6.5.9.4. Nótese como la respuesta de algunos de los industriales demandados es que no vierten sus aguas residuales directamente al RÍO BOGOTÁ, otros, que se encuentran dentro de la caracterización de sus vertimientos y cancelan a la autoridad ambiental la Tasa Retributiva, como si con esa conducta no se causara día tras día la contaminación ampliamente pregonada, desatendiéndose de sus deberes constitucionales como si los recursos naturales sean inagotables, sin percatarse como lo anuncia la propaganda del BANCO MUNDIAL QUE PARA EL AÑO 2025, **MUY CERCANO**, LA GUERRA SERÁ POR EL RECURSO HIDRICO.

6.5.9.5. **De La Reparación Del Daño Ambiental Por Los Particulares.** Es por todo ello, que a quienes se les ha concedido licencias ambientales, como los que han hecho mal uso de los recursos naturales sin haberlas obtenido, que para los efectos de esta acción fueron llamados a participar en las diferentes mesas de trabajo en orden a lograr unos procesos de producción más limpia, les corresponde la responsabilidad de reparar el daño ambiental (entre otros la Reforestación)

que han causado en ejercicio de la libertad de empresa por la falta de cumplimiento de las obligaciones que el estudio de impacto ambiental les imponía al momento en que presentaron sus solicitudes de licencia ambiental, so pena de quedar incurso en las conductas típicas, antijurídicas y culpables previstas en el Código Penal como en esta providencia se consigna.

**6.5.9.6. De la Participación de los Diferentes Gremios en los Programas de Producción Mas Limpia como en la Descontaminación del Río Bogotá y sus Afluentes.** Para los efectos previstos en el numeral anterior, las autoridades ambientales deberán coordinar con los diferentes gremios de la producción los PROGRAMAS DE PRODUCCIÓN MÁS LIMPIA con las sanciones administrativas correspondientes a quienes desacaten sus directrices y la compulsa de las diferentes actuaciones administrativas a la FISCALÍA GENERAL DE LA NACIÓN para la apertura de los respectivos procesos penales a quienes continúen con prácticas de degradación del medio ambiente con perjuicio del interés general.

**6.5.10. DEL SERVICIO MILITAR OBLIGATORIO AMBIENTAL, DE LA POLICÍA AMBIENTAL Y DE LOS GUARDABOSQUES.** Para reforzar la tarea de las autoridades ambientales y la de las entidades territoriales, la Ley 99 de 1993 en su artículo 102, prevé que un 20% de los bachilleres seleccionados para prestar el servicio militar obligatorio, prestarán servicio ambiental, preferiblemente entre quienes acrediten capacitación en las áreas de que trata esta ley.

**6.5.10.1.** En ese orden, la Secretaría de Educación del Distrito Capital, como la Departamental y los diferentes alcaldes municipales de las tres cuencas, según las políticas que para el efecto trace el Ministerio de Educación Nacional, deberán impartir a los educandos de los centros de

Educación Media la correspondiente cátedra ambiental, programas que deberán coordinar con el MAVDT y con la CAR.

6.5.10.2. De igual manera, el Gobierno Nacional deberá proceder a tomar las medidas necesarias para la implementación del cuerpo de policía ambiental, que deberá prestar prioritariamente su servicio en las zonas de reserva, en la cuenca del RÍO BOGOTÁ Y DE SUS AFLUENTES, como se prevé en el artículo 101 de la misma ley.

6.5.10.3. De otra parte, atendiendo al convenio que la CAR y el DAMA suscribieron para la preservación de las Zonas de Reserva Forestal que se denominó PLAN DE ORDENAMIENTO DE MANEJO DE LOS CERROS ORIENTALES “**POMCO**”, en el que se realindera la zona y se crea una zona de frontera para que los particulares defiendan los cerros, como una especie de bancos de tierra, se dispondrá que dichas autoridades ambientales en el término máximo de tres meses contados a partir de la notificación de esta sentencia, conformen el grupo de GUARDABOSQUES para el cumplimiento de los fines del convenio.

**6.6. DE LA UBICACIÓN DEL RÍO BOGOTÁ, DE SU ESTADO DE CONTAMINACIÓN Y DE LAS PROYECCIONES DE LA POBLACIÓN Y CARGAS CONTAMINANTES.** Establecidas las competencias y las responsabilidades de todas las personas jurídicas como de las particulares, antes de proceder a señalar cuál es la alternativa de solución única para la descontaminación del RÍO BOGOTA como de sus afluentes, es preciso referirse a ciertos aspectos relacionados con el mismo.

6.6.1. DE LAS CUENCAS DEL EL RÍO BOGOTÁ. la CAR lo ha dividido en tres cuencas en el Acuerdo 58 de 1987, así:

| <b>Cuenca Alta<br/>(18 municipios)</b> | <b>Cuenca Media<br/>(Bogotá y 8<br/>municipios)</b> | <b>Cuenca Baja<br/>(15 municipios)</b> |
|----------------------------------------|-----------------------------------------------------|----------------------------------------|
| Villapinzón                            | Bogotá                                              | San Antonio del Teq.*                  |
| Chocontá                               | Funza                                               | Tena                                   |
| Suesca                                 | Mosquera                                            | La Mesa                                |
| Sesquilé                               | Soacha                                              | El Colegio                             |
| Gachancipá                             | Sibaté                                              | Anapoima                               |
| Tocancipá                              | Subachoque                                          | Apulo                                  |
| Zipaquirá                              | El Rosal                                            | Tocaima                                |
| Cajicá                                 | Madrid                                              | Agua de Dios                           |
| Sopó                                   | Facatativa                                          | Ricaurte                               |
| Chía                                   |                                                     | Girardot                               |
| Cota                                   |                                                     | Bojacá                                 |
| Nemocón                                |                                                     | Zipacón                                |

6.6.2. DEL ESTADO DE CONTAMINACIÓN DEL RÍO BOGOTÁ.  
La Sala comenzará por referirse a los estudios realizados desde la década de los 90, por el Centro de Investigaciones en Acueductos y Alcantarillados “CIACUA” del Departamento de Ingeniería Civil y Ambiental la Facultad de Ingeniería de la UNIVERSIDAD DE LOS ANDES (expertos que se mencionan en el folio 4223 del cuaderno 7 principal), con el fin de buscar no sólo alternativas de saneamiento sino soluciones definitivas al problema de eutroficación que se ha venido presentando en el EMBALSE DEL MUÑA, en los que han participado también la EAAB, la EEB y EMGESA debido al estado crítico del RÍO BOGOTÁ,

por ende, del embalse, que se llevó a cabo mediante mesas de trabajo que se denominaron PLANTEAMIENTO DE DIRECTRICES Y LINEAMIENTOS PARA EL DESARROLLO DE ALTERNATIVAS DEL MANEJO AMBIENTAL DEL EMBALSE DEL MUÑA, la cual estuvo compuesta por cinco expertos internacionales a saber: WARREN PESCOD (University of New Upon Tyne), TIMOTHY LACK (Water Research Centre Public Limited Company), JULIAN SANDINO (Black and Vacht), EUGENIO GIRALDO (Icon enguneering inc), MANUEL PIZARRO (Banco Interamericano de Desarrollo), documento traído al proceso oportunamente por EMGESA, los cuales muestran los siguientes aspectos principales del RÍO BOGOTÁ (el estudio va de fls. 4218 a 4276 c. idém en el capítulo 6 aparecen las Referencias Consultadas, entre otras a la CAR y los POT de los municipios de Sibaté y de Soacha, los estudios técnicos de las Alternativas del Manejo Ambiental en las colas del Embalse del Muña, de la Unión Temporal de Saneamiento del Río Bogotá –julio de 2003 realizada por la EAAB. Por la Comisión Nacional del Agua del Instituto Mejicano de Tecnología de Agua. Ovidio Macarena, José Aguilar, Ramiro Vega y José Lomeli, por EMGESA) :

#### **6.6.2.1. “Descripción General del Río Bogotá.**

6.6.2.1.1. “El Río Bogotá nace en el Páramo de Guacheteque en el municipio de Villapinzón (Cundinamarca) a una altura de 3300 m.s.n.m, y desemboca en el Río Magdalena, en el municipio de Girardot, a una altura aproximada de 280 m.s.n.m. Se calcula que el 20% de la población colombiana habita en la Cuenca del Río Bogotá y que igualmente allí ocurre el 28% de la actividad económica de la Nación.

6.6.2.1.2. “De manera general, se puede decir que el Río Bogota se divide en tres Cuencas: Cuenca Alta, Cuenca Media y Cuenca Baja. .

6.6.2.1.2.1. “Cuenca Alta:

- “La Cuenca Alta está comprendida entre el municipio de Villapinzón en el K 0+000 hasta la estación La Virgen en el K 144+915.
- El caudal del río es regulado por la presencia de dos embalses: El Embalse de Tominé y el Embalse de Sisga. El caudal medio en la estación de La Virgen es de 13.5 m<sup>3</sup>/s.
- “El agua del río se utiliza para potabilización y suministro de agua para consumo de la ciudad de Bogotá en la Planta de Tratamiento de Tibitoc.

6.6.2.1.2.2. “Cuenca Media:

“La Cuenca Media está comprendida entre el K144+915 correspondiente a la estación La Virgen y el K212+950 en la estación Variante Mondoñedo.

“Recibe las aguas residuales del sistema de drenaje urbano de Bogotá y sus áreas periféricas. Las cuencas de drenaje urbano de Bogotá reciben el nombre de las principales corrientes naturales que cruzan la ciudad: RÍO JUAN AMARILLO O SALITRE, RÍO FUCHA Y RÍO TUNJUELO.

“El aporte medio de aguas, principalmente de aguas residuales domésticas, en esta cuenca es el más importante con caudales medios de 37 m<sup>3</sup>/s.

“Existe una demanda significativa de agua para riego a través del Distrito de Riego de la Ramada.

6.6.2.1.2.3. “Cuenca Baja:

- “La Cuenca Baja inicia en las compuertas de Alicachín donde el agua del Río Bogotá es utilizada en su totalidad para la generación eléctrica durante una gran parte del tiempo. La cuenca se extiende hasta el K336 correspondiente a la desembocadura del Río Bogotá en el Río Magdalena en el Municipio de Girardot.
- “El agua del Río Bogotá en Alicachín se entuba para ser utilizada en la generación eléctrica en dos cadenas paralelas de generación. Una de estas cadenas utiliza el Embalse del Muña.
- “A la altura de la estación La Guaca, Km 247, el Río Bogotá recibe la descarga de la cadena de generación hidroeléctrica Paraíso-Guaca que anteriormente había embalsado las aguas en el Muña. La segunda parte de la Cuenca Baja tiene pendientes moderadas y mayores temperaturas que aceleran los procesos metabólicos en el río. El Río Bogotá en su desembocadura tiene caudales del orden de los 50 m<sup>3</sup>/s. El Río Magdalena tiene caudales tales que generan una dilución superior a 1-10 cuando el Río Bogotá le vierte sus aguas.

6.6.2.2. “Calidad del Agua del Río Bogotá.

“La calidad del agua del Río Bogotá se ha estudiado con cierta consistencia en los últimos 20 años. La Universidad de los Andes' durante los años 2001 y 2002 ha realizado campañas de muestreo a lo largo del Río Bogotá con el fin de tener una base de datos para modelar la calidad del agua bajo las condiciones actuales y futuras de descargas sobre él.

“El Río Bogotá presenta manifestaciones de contaminación acuática en todos los órdenes: contaminación por patógenos, contaminación por

materia orgánica, eutrofización y contaminación por sustancias tóxicas. Dicha contaminación genera conflictos a lo largo del río y la calidad de su agua para soportar sus usos. Los conflictos más importantes se centran alrededor de la contaminación por patógenos, por materia orgánica y por nutrientes (eutrofización).

A continuación se presenta una breve descripción en torno a estos conflictos mencionados.

#### 6.6.2.2.1. “Contaminación por Materia Orgánica

“En el caso del Río Bogotá la gran mayoría de las descargas por materia orgánica están asociadas a descargas municipales y por lo tanto la contaminación se traduce en altos contenidos de patógenos.

“La mayoría de las descargas ocurren en la Cuenca Media donde se observa que las más importantes corresponden a las cuencas sanitarias de la ciudad, que llevan el nombre de las cuencas de drenaje natural de la ciudad, ríos Juan Amarillo, Fucha y Tunjuelo.

“Por otro lado, la concentración de **DB05** total se incrementa a medida que el río recibe las descargas de la Cuenca Media llegándose a concentraciones pico del orden de los 130 mg/l. Es claro también que en la misma Cuenca Media, el río presenta reducciones significativas de las concentraciones de la DB05 inmediatamente después de las descargas principales de cada uno de los ríos JUAN AMARILLO, FUCHA Y TUNJUELO. *Esto se debe a su condición anaerobia y escasa velocidad, el río en su Cuenca Media presenta un proceso de autodepuración de los sedimentos denominado metanogénesis. Una vez el río llega a las compuertas de Alicachín es bombeado hasta el EMBALSE DEL MUÑA. El embalse degrada parte de la materia orgánica del agua. Además, las*

*turbinas de generación aumentan el nivel de oxígeno disuelto en el río, mejorando la calidad del agua en la Cuenca Baja.*

“En el último trayecto del río, después de las descargas de las cadenas de generación y *antes de su desembocadura al Río Magdalena, la DB05 disminuye una vez más debido a la oxidación asociada a las condiciones aeróbicas del río en este tramo y a las mayores temperaturas del agua que incrementan la biodegradación.*

#### 6.6.2.2.2. “Concentración de Oxígeno Disuelto

“En la Cuenca Alta se observa que *el río en general tiene concentraciones de oxígeno disuelto, **que sin ser ideales**, todavía son suficientes para sostener vida superior.* A partir del K 52 (recordar que va desde el 0.000 hasta el 144.915 K) se observa *una caída sostenida del oxígeno disuelto* que corresponde a un *incremento igualmente sostenido de la DBO*. Vale la pena notar cómo dicho incremento de la DBO de 10 a 20 mg/l genera una caída en el oxígeno disuelto a 2 mg/l **lo que indica la baja capacidad de reaireación que tiene en las Cuencas Alta y Media.** Esta baja capacidad de reaireación, combinada con la *baja capacidad de dilución* asociada a los *bajos caudales* genera una gran **fragilidad en el río para asimilar descargas contaminantes.** De esta manera, antes de entrar a recibir las descargas más importantes de la zona más densamente poblada del país viene ya en condiciones precarias.

“Es importante enfatizar el significado de la observación anterior dentro del esquema de saneamiento del río. **Aún con las pocas cargas que recibe en la Cuenca Alta, la concentración de oxígeno disuelto se disminuye de tal manera que entra en condiciones casi anóxicas.** La capacidad de asimilación de carga orgánica del Río Bogotá en la Cuenca Alta y Media es extremadamente baja para enfrentar las gigantescas

descargas asociadas a los usos agrícolas, industriales y urbanos de la cuenca.

“Una vez las descargas de la zona metropolitana de Bogotá ocurren, se considera **después del Puente de La Virgen en Cota, el río se torna anaerobio, es decir, con ausencia de oxígeno disuelto en la columna de agua**, en toda la Cuenca Media y durante la mayoría del año. Bajo algunas condiciones hidrológicas de períodos de lluvias, se alcanzan concentraciones marginales de oxígeno disuelto en algunas zonas de la Cuenca Media del río.

“El Río Bogotá una vez *llega a Alicachín, en condiciones anaerobias*, se utiliza para la generación eléctrica y es entubado por dos cadenas de generación. **Las aguas de generación son descargadas nuevamente al cauce del río, y por efecto de la alta pendiente y la acción de las turbinas, el oxígeno disuelto se incrementa nuevamente logrando concentraciones hasta de 7 mg/l.** Este efecto no es muy duradero ya que nuevamente **en la parte final las pendientes se reducen disminuyendo la capacidad de reaeración, y dada la todavía alta concentración de DBO en la columna de agua y la presencia igualmente importante de DBO nitrogenada, la concentración de oxígeno disuelto disminuye rápidamente.** Al entregar sus aguas al Río Magdalena en el Municipio de Girardot, el Río Bogotá tiene una concentración de oxígeno disuelto cercana a 1 mg/l.

“Esta última observación es de importancia porque indica que el Río Bogotá cuando llega a la ciudad de Girardot está muy cerca de tornarse nuevamente anaerobio. Un incremento de la carga orgánica aguas arriba, podría entonces generar condiciones anaerobias a su paso por Girardot.

#### 6.6.2.2.3. “Olores en el Río Bogotá

“Uno de los impactos más importantes que tiene el Río Bogotá directamente sobre la población es la presencia de malos olores. En la Cuenca Media la presencia de olores en el Río Bogotá esta íntimamente relacionada con las condiciones de anaerobicidad y con la presencia de zonas de acumulación de sedimentos orgánicos. Los olores se producen por la generación de compuestos reducidos de azufre, CRA<sup>6</sup> de los cuales el más conocido e importante es el H<sub>2</sub>S o sulfuro de hidrógeno.

“La Universidad de los Andes ha realizado varios estudios sobre la emisión de olores en el río. En el primero de los estudios se evaluaron los efectos que tendría el enviar el río por su cauce natural en la Cuenca Baja sin ser **entubado para generación eléctrica**. Se determinó que las concentraciones de sulfuro de hidrógeno en los alrededores serían altas y generarían peligro a la población cercana.

“El segundo estudio de la Universidad de los Andes se relacionó de manera más directa con las emisiones de CRA en la Cuenca Media del Río Bogotá. Se encontró que las mismas estaban relacionadas con la presencia de sedimentos orgánicos y simultáneamente bajas concentraciones de oxígeno disuelto.

#### 6.6.2.2.4. “Contaminación por Patógenos

“Como se mencionó anteriormente, las principales descargas al Río Bogotá son descargas de origen municipal y por lo tanto con grandes aportes de patógenos.

---

<sup>6</sup> Existen otros CRA identificados para el Río Bogotá como son el dimetil-sulfuro, el dimetil-disulfuro, el disulfuro de carbono y muchos mercaptanos de cadena corta como el metil, propil y bitilmercaptano.

“En general, las concentraciones de coliformes son superiores a las aceptables por la reglamentación Colombiana para riego. Vale la pena mencionar que las concentraciones en la Cuenca Media son básicamente concentraciones similares a las observadas en aguas residuales domésticas puras. En la Cuenca Media y Baja existe un decaimiento significativo, mas no suficiente para lograr los estándares mínimos requeridos para riego.

#### 6.6.2.2.5. “Contaminación por Nutrientes

“Se ha encontrado que el fósforo es el nutriente limitante en el EMBALSE DEL MUÑA como consecuencia del bombeo de aguas del RÍO BOGOTÁ.

“Las concentraciones en el RÍO BOGOTÁ superan los rangos normalmente observados en corrientes naturales. El fósforo, a diferencia del nitrógeno y el carbono, no tiene un intermediario gaseoso que permita su eliminación de la columna de agua hacia la atmósfera. **La única forma de eliminar el fósforo en una corriente es por procesos de sedimentación.** El fósforo se sedimenta junto con el resto de la materia orgánica después de las grandes descargas de aguas residuales de la ciudad de Bogotá en la Cuenca Media produciendo un proceso de metanogénesis.

“Existe una reducción significativa del fósforo a su paso por el Embalse del Muña; esto implica que *el Muña tiene una acumulación neta de fósforo debido a la sedimentación que se logra*. Los sedimentos del Muña son un gran reservorio de fósforo en el embalse. Como se verá más adelante **este efecto es uno de los principales limitantes en la recuperación trófica del EMBALSE DEL MUÑA.**

**6.7. DE LOS PRINCIPALES ASPECTOS DE LAS INVESTIGACIONES ADELANTADAS A TENER EN CUENTA PARA LOS EFECTOS DE LA APROBACIÓN DE LOS PACTOS DE CUMPLIMIENTO COMO TAMBIÉN PARA LA TOMA DE LAS DEMÁS DECLARACIONES Y ÓRDENES A PROFERIR SOBRE LA SOLUCIÓN TÉCNICA ACORDADA CON LOS DIFERENTES ACTORES DEL PROCESO.**

6.7.1. DE LAS DIFERENTES ACCIONES Y OBRAS A REALIZAR PARA LA DESCONTAMINACIÓN DEL RÍO BOGOTÁ. Para efectos de establecer el estado de contaminación en que se encuentra el RÍO BOGOTÁ, como las alternativas a seguir para su descontaminación entre las cuales se encuentran los programas de educación ambiental para efectivizar los procesos de producción más limpia, la construcción de los Planes Maestros y Alcantarillados de cada uno de los municipios que vierten sus aguas residuales directamente a él, o en forma indirecta a través de sus afluentes, la ampliación de la PTAR Salitre, la construcción de los interceptores y colectores dentro del D.C., la construcción de la estación elevadora de Tunjuelo y de Canoas y la PTAR del mismo nombre, el interceptor CANOAS-ALICACHÍN y, finalmente el dragado del río (que requiere de un estudio de impacto ambiental de la disposición de lodos, que debe aprobarse por la autoridad ambiental), la Sala estima pertinente referirse a la prueba documental allegada por la EAAB, en cuanto no existen documentos por parte de la CAR y del MINISTERIO DEL MEDIO AMBIENTE que demuestren lo contrario, e igualmente en consideración a que las conclusiones a las que se llegan en dichos estudios e investigaciones fueron objeto de análisis por la mesa que se integró para efectos de establecer la SOLUCIÓN TÉCNICA INTEGRAL PARA LA DESCONTAMINACIÓN DEL RÍO BOGOTÁ, a la que en forma reiterada se refiere esta sentencia.

6.7.2. DE LAS PROYECCIONES DE LA POBLACIÓN, DE LAS CARGAS CONTAMINANTES Y DE LOS CAUDALES. Las conclusiones que son materia de análisis y valoración probatoria por la Sala se extraen no solo de las conclusiones a las que se llegó por la MESA DE SOLUCIÓN TÉCNICA INTEGRAL PARA LA DESCONTAMINACIÓN DEL RÍO BOGOTÁ, sino de los siguientes cuadernos presentados por la EAAB en el proceso, todos los cuales se ordenaron tener como pruebas, sin que las partes los hubieran contradicho con otras pruebas:

- Evaluación Técnica de las Plantas de Tratamiento de Aguas Residuales de “EL SALITRE” / Unión Temporal Saneamiento Río Bogotá (Water Research Center). Agosto de 2002.
- Comportamiento de la Cuenca Media del Río Bogotá con Caudales Bajos. (Carlos Alberto Giraldo López). Julio de 2003
- Usos y Estándares de la Calidad del Río Bogotá. Unión Temporal Saneamiento Río Bogotá. Agosto de 2002.
- Ajustes de datos para informe de uso y estándares de calidad del Río Bogotá. (Carlos Alberto Giraldo López). Mayo de 2003.
- Modelación preliminar de la calidad de aguas en los interceptores Fucha-Tunjuelo, Tunjuelo- Canoas y de la calidad de agua del Río Bogotá para la condición con y sin interceptores. (Luis Alejandro Camacho). Octubre de 2003.
- Población, caudales y cargas contaminantes. Unión Temporal Saneamiento Río Bogotá. Agosto de 2002.
- Modelación de la calidad del Agua del Río Bogotá. Diciembre de 2002.
- Estudios hidráulicos, geotécnicos y topográficos para definir el nivel de los jarillones y obras requeridas para mitigar el riesgo de inundación del Río Bogotá

en el tramo Alicachín – La Conejera. Hidroestudios S.A. Ingenieros. Marzo de 2000.

- Estudio de Actualización del Plan Maestro de Alcantarillado de la Cuenca del Fucha, diseño de obras de expansión, interceptor Río Bogotá – Fucha- Tunjuelo, informe de alternativas. H MV Ingenieros. Septiembre de 2002.
- Alternativas del Interceptor Tunjuelo – Canoas. (Carlos Alberto Giraldo López) Mayo de 2003.
- Prediseño Planta de Tratamiento de Aguas Residuales Canoas. (Carlos Alberto Giraldo López) Junio de 2003.
- Desinfección de efluentes de las Plantas de Tratamiento de Aguas Residuales. (Carlos Alberto Giraldo López) Mayo de 2003.
- Programa de Saneamiento del Río Bogotá, definición de la alternativa a seguir. Unión Temporal Saneamiento Río Bogotá. Julio de 2003.
- Diseño de rehabilitación- Diseño de las Obras para la protección contra las inundaciones del RÍO BOGOTÁ en el sector La Conejera-Alcachín. Versión 1 de H MV Ingenieros, 08/09/03. Se anexa el plano de Diseño de Aguas Lluvias, en cuyas convenciones aparecen los temas que inquietan a la CAR en sus alegatos de conclusión como lo son, entre otros, la profundidad del dragado del río y la disposición de lodos, plano que fue objeto de revisión en la Mesa de Solución Técnica Integral por los expertos en la materia de la CAR Y DEL MAVDT, DEL DEPARTAMENTO DE CUNDINAMARCA y demás participantes.
- Justificación de las propuestas del Proyecto de Pacto de Cumplimiento. Noviembre de 2003.
- Usos y estándares de la calidad del Río Bogotá. Escenario más probable de la Cuenca del Río Bogotá con Horizonte de Planificación al año 2012. Unión Temporal Saneamiento Río Bogotá. Agosto de 2002.

**6.7.2.1. “Población, caudales y cargas contaminantes** (ver cuaderno Unión Temporal Saneamiento Río Bogotá).

6.7.2.1.1. Como introducción, se menciona que “el informe presenta el estudio de población, caudales y cargas contaminantes de la ciudad de Bogotá D. C. y del municipio vecino de Soacha, que se encuentran localizados en el trayecto denominado cuenca media del Río Bogotá, sobre la margen oriental de éste. La cuenca media se extiende desde la estación La Virgen sobre el río, en inmediaciones del Municipio de Cota, hasta Alicachín”.

6.7.2.1.2. Se indica que “físicamente la ciudad de Bogotá está conformada por cuatro grandes cuencas de drenaje sanitario, como se muestra en la Figura 1.1, a saber:

“Cuenca Torca

“Cuenca Salitre, que incluye las cuencas de Conejera y Jaboque

“Cuenca Fucha, que incluye parte de la Cuenca Tintal

“Cuenca Tunjuelo, que incluye el resto de la Cuenca Tintal

6.7.2.1.3. “El drenaje de estas cuencas tiene lugar en sentido oriente occidente, mientras que el río Bogotá discurre en sentido norte sur, constituyéndose en el límite occidental tanto del Distrito Capital como del casco urbano Soacha.

6.7.2.1.4. “La Cuenca Torca incluye la zona de Guaymaral, cuyo desarrollo fue restringido por el Plan de Ordenamiento Territorial del Distrito Capital (P.O.T.), aprobado según el Decreto 619 de Julio 28 de 2000, con vigencia hasta el año 2009.

6.7.2.1.5. “El área de la cuenca sanitaria Torca tiene una extensión de 1,397 ha (hectáreas), la cuenca Salitre 12,518 ha, la cuenca Fucha 14,731

ha y la cuenca Tunjuelo 10,039 ha, de acuerdo con los límites definidos por las redes de alcantarillado sanitario existentes y proyectadas.

6.7.2.1.6. “Las redes troncales de los sistemas de alcantarillado sanitario se desarrollan paralelas a los ejes de drenaje de cada cuenca, como son el RÍO SALITRE en la cuenca del mismo nombre y en la CUENCA TORCA, EL RÍO FUCHA y el RÍO TUNJUELO en las cuencas de igual nombre.

6.7.2.1.7. “Las redes sanitarias de la cuenca Salitre actualmente, y Torca próximamente, llegan hasta la planta de tratamiento de aguas residuales del Salitre, **mientras que las redes de las demás cuencas llegan directamente a los ríos y éstos a su vez conducen las aguas hasta el río Bogotá.**

6.7.2.1.8. “Por su parte el Municipio de Soacha se localiza al sur del Distrito Capital, como se muestra en la figura 1.1, y su cuenca de drenaje también se desarrolla en torno al río del mismo nombre, con una extensión de 1,625 ha. **Su sistema sanitario actualmente está entregando en forma directa a los RÍOS TUNJUELO, SOACHA Y BOGOTÁ y la QUEBRADA TIBANICA, afluente del Bogotá.**

6.7.2.1.9. “Se expresa que el documento define las cifras de población y caudales para el dimensionamiento de las estructuras de saneamiento del río Bogotá, tales como interceptores, estaciones elevadoras y plantas de tratamiento de aguas residuales y un estimativo de cargas contaminantes, todo lo anterior enmarcado dentro de la cuenca media del río en inmediaciones de Bogotá D. C. y el municipio de Soacha.

6.7.2.1.10. “Para ello, se establecieron las proyecciones de población y demanda de agua potable en cada una de las cuencas y a partir de éstas se estimaron sus aportes de aguas residuales utilizando la base de datos del

estudio Actualización de la Proyección de la Demanda de Agua<sup>1</sup>, y las áreas de drenaje definidas en los estudios ACTUALIZACIÓN DEL PLAN MAESTRO DE ALCANTARILLADO PARA LAS CUENCAS DE SALITRE, JABOQUE Y FUCHA<sup>2</sup> Y DISEÑO DETALLADO DEL INTERCEPTOR TUNJUELO BAJO<sup>3</sup>.

6.7.2.1.11. “También se revisaron mediciones de la infiltración en los sistemas de alcantarillado, con el objeto de proponer criterios para su estimación, que junto con estimativos de los volúmenes de agua que escurren por las redes, permitió determinar los caudales sanitarios de diseño de las distintas estructuras del saneamiento.

6.7.2.1.12. “Igualmente, se consultaron estudios de mediciones de carga contaminante en las redes de alcantarillado para obtener estimativos para el Distrito y Soacha.

6.7.2.1.13. “Para el MUNICIPIO DE SOACHA se consultará adicionalmente la información de la Gobernación de Cundinamarca y de LOS ESTUDIOS PLAN MAESTRO DE ALCANTARILLADO PARA EL MUNICIPIO DE SOACHA y las cifras del estudio Bogotá y Cundinamarca. Expansión y Sostenibilidad .

“1 TEA Ltda. Estudio de Actualización de la proyección de la demanda de agua, Informe Ejecutivo. Elaborado para la EAAB, Bogotá D.C. 1999.

“2 Hidroestudios S.A. Estudio de Actualización del plan maestro de alcantarillado para las cuencas de Salitre, Jaboque y Fucha, Versión preliminar. Elaborado para la EAAB, Bogotá D.C. 2001.

“3 HC, Ingenieros Consultores Ltda. Elaboración de los Diseños Detallados para la Construcción de los Interceptores Tunjuelo Alto Derecho, Tunjuelo Bajo Derecho, Tunjuelo Bajo Izquierdo y Redes Complementarias. Actualmente en elaboración la EAAB, Bogotá D.C. 2001.

“4 Estudios Técnicos, Plan Maestro de Alcantarillado para el municipio de Soacha, informe final, Elaborado para la Gobernación de Cundinamarca y la EAAB, Bogotá D.C., 2001.

“5 Preciado P. A., Bogotá y Cundinamarca. Expansión y Sostenibilidad, Elaborado para la Corporación Autónoma de Cundinamarca, CAR, Bogotá D.C., 2000.

6.7.2.1.13.1. Se resalta que en ese capítulo “se presenta la recopilación y análisis de las cifras de población proyectada para Bogotá y Soacha obtenidas de los estudios y planes maestros citados, complementadas con reportes de otras entidades gubernamentales como el Departamento Administrativo Nacional de Estadísticas DANE, el Departamento de Planeación Distrital DAPD, la Corporación autónoma de Cundinamarca CRA y el Departamento Nacional de Planeación.

#### **6.7.2.2. “Proyecciones Para Bogotá D. C.**

##### *6.7.2.2.1. “ Estudio de TEA-99*

6.7.2.2.1.1. “El Estudio de Actualización de la proyección de la demanda de agua, referencia 1, denominado genéricamente como estudio de TEA-99, realiza un ajuste y proyección de la población y vivienda hasta el año 2020 y saturación, a partir del "*Estudio de Población y Demanda para la Ciudad de Santa Fe de Bogotá*", elaborado por TEA-CIC para la EAAB en 1997, el cual se denomina genéricamente estudio de TEA-97.

6.7.2.2.1.2. “El ajuste al estudio de TEA-97 se debió a los cambios en las costumbres de consumo de la población bogotana a partir del año 1996 y por otra parte, a la reglamentación de los usos del suelo de la ciudad establecida por el Plan de Ordenamiento Territorial, que implican una redistribución de la población en los sectores censales.

6.7.2.2.1.3. “Los estudios de TEA-97 y de TEA-99 establecen las proyecciones de la población y la demanda de agua potable de la ciudad de Bogotá D.C. y los municipios circunvecinos, como una herramienta fundamental de la Empresa de Acueducto y Alcantarillado, EAAB ESP para el planeamiento de sus funciones y operaciones.

6.7.2.2.1.4. “El estudio de 1999 se basó en la información de los sectores censales establecidos por el DANE en el censo de 1993 y en la facturación del consumo de agua potable de la ciudad. A partir de estos datos y del análisis de la dinámica demográfica se determinaron las tendencias de desarrollo de la población en las áreas actuales y de expansión de la ciudad considerando un escenario de crecimiento medio y tres escenarios de consumo de agua, bajo, medio y alto.

6.7.2.2.1.5. “Dentro del estudio de TEA-97, se consideraron los escenarios de crecimiento de la población alto, medio y bajo, y el estudio de TEA-99 actualiza las proyecciones con base en el escenario medio de éste, definiendo la población de Bogotá año a año hasta el 2020 y hasta la condición de saturación de la ciudad, conforme a las normas de densificación.

6.7.2.2.1.6. “Posteriormente durante la elaboración del estudio TEA-99, aparece el POT del Distrito como una herramienta de planificación, cuyas políticas se incluyeron en otro escenario de modelación del estudio. Sin embargo, el estudio de TEA-99 no contempla las restricciones de la zona de Guaymaral en el borde norte de la ciudad, que fueron determinadas en el POT aprobado a mediados del año 2000, posteriormente a la culminación del estudio en referencia.

6.7.2.2.1.7. “Las proyecciones de crecimiento de la ciudad realizadas por TEA, se basan en un análisis de la manera como la ciudad ha venido creciendo en los últimos años, donde se consideran los patrones de

fecundidad y mortalidad, el comportamiento de las migraciones internas e internacionales, las tendencias de distribución territorial de la población y los procesos de urbanización y concentración de la población.

6.7.2.2.1.8. “Con la información de los sectores censales del estudio de TEA-99 y sus proyecciones de población la Unión Temporal realizó un ejercicio, consistente en determinar la población que alberga cada una de las grandes cuencas sanitarias de la ciudad de Bogotá, para lo cual se definieron los límites de las mismas, de acuerdo con los estudios de las referencias 2, 3 y 4.

6.7.2.2.1.9. “Debe aclararse que una fracción de la subcuenca de Tintal quedó incluida dentro de los límites de la cuenca Fucha y la otra fracción en la de Tunjuelo. También se debe anotar que la cuenca de Torca en este caso no tiene las restricciones impuestas por el POT. Los resultados de población del ejercicio se presentan en el siguiente cuadro:

6.7.2.2.1.10. “Población en habitantes por Cuencas en la Ciudad de Bogotá, según TEA-99

| CUENCA       | AÑO       |            |
|--------------|-----------|------------|
|              | 2020      | SATURACIÓN |
| Torca        | 1,046,242 | 1,222,070  |
| Salitre      | 2,492,877 | 3,023,264  |
| Fucha        | 2,850,840 | 3,496,324  |
| Tunjuelo     | 3,210,460 | 3,423,531  |
| Total Bogotá | 9,600,418 | 11,165,190 |

6.7.2.2.2. *Estudio de Hidroestudios S. A.*

6.7.2.2.2.1. “El estudio de actualización del plan maestro de alcantarillado de la CUENCAS SALITRE, JABOQUE Y FUCHA de la referencia 2, que actualmente se encuentra en elaboración por parte de Hidroestudios S.A., presenta en el informe de Estimación de la Producción de Aguas Residuales, el ajuste de las proyecciones de población de la ciudad hasta el 2020 y a saturación, considerando las restricciones planteadas por el POT del Distrito

6.7.2.2.2.2. “Este estudio contempla los análisis realizados por áreas y usos del suelo, los impactos por renovación urbana y proyecciones realizadas por TEA-99, los condicionantes sobre política de usos y densidades de ocupación de acuerdo al POT de la ciudad, y analiza específicamente la zona de Guaymaral o el denominado borde norte, cuyo crecimiento y desarrollo fueron restringidos para los próximos 10 años.

6.7.2.2.2.3. “Con base en los criterios de saturación adoptados para cada cuenca, se definió la población que podría asentarse en cada una de ellas como producto de la redistribución de la población del borde norte, acatando lo establecido por el POT.

6.7.2.2.2.4. “La hipótesis para la distribución de la población de Guaymaral consistió en revisar el margen de saturación, es decir la diferencia de población entre el año 2020 y la de saturación, de cada uno de los sectores censales de las demás cuencas por estratos y según éste, asignarles proporcionalmente la población de Guayrnaral, sin superar la capacidad de saturación prevista originalmente.

6.7.2.2.2.5. “El estudio tomó como base el escenario de población POT medio de TEA-99 con las proyecciones de los sectores censales de la

ciudad hasta el 2020 y a saturación, y realizó el cruce con los límites de las cuencas de drenaje sanitario, teniendo en cuenta además los límites de expansión que definió el POT, con lo cual determinó la población al 2020 y a saturación que albergará cada cuenca.

6.7.2.2.2.6. “Se debe indicar que los límites de las cuencas sanitarias se extendieron hasta los bordes de los sectores censales para no fraccionarlos, por lo que el límite sanitario utilizado no es preciso.

6.7.2.2.2.7. “Este estudio no incluye el análisis de las poblaciones para las CUENCAS TINTAL Y TUNJUELO, al sur de la ciudad. Sin embargo, establece en porcentaje cuál sería la población que recibiría la CUENCA DEL TUNJUELO AL 2020 en virtud de la distribución de población originada por la restricción de crecimiento del borde norte establecida por el POT.

6.7.2.2.2.8. “De acuerdo con el ejercicio realizado en este estudio se estableció la distribución. de población por cuencas que se presenta en el siguiente cuadro:

6.7.2.2.2.9. “Población excluida de Guaymaral por distribuir en las demás cuencas, según HE.

Límites sanitarios por los bordes de los sectores censales.

| CUENCA               | POBLACION POR AGREGAR | PORCENTAJE |
|----------------------|-----------------------|------------|
| Torca                | 28,698                | 35.98      |
| Salitre              | 382,239               | 48.33      |
| Fucha                | 518,740               | 2.70       |
| Tunjuelo             | 132,679               | 12.49      |
| Total por Distribuir | 1,062,356             | 100.00     |

6.7.2.2.9.1. “Según el cuadro anterior, los sectores censales de Guaymaral restringidos por el POT tendrían una capacidad a saturación de 1.062.356 habitantes, que finalmente es la capacidad de ocupación que perdería la ciudad a largo plazo. Se debe recordar que a pesar de que esta población sea redistribuida a las demás cuencas, en ningún caso se aumenta la capacidad de saturación o la densidad poblacional prevista inicialmente para el resto de la ciudad.

6.7.2.2.3. “Información del DANE

6.7.2.2.3.1. “La información que suministra el DANE se utilizó como punto de referencia para cotejar con los demás estudios de población, tanto de la ciudad de Bogotá como para el municipio de Soacha.

6.7.2.2.3.2. “Esta información establece proyecciones basadas en los censos nacionales de 1993 y anteriores, totalizando por ciudades y municipios, discriminado cabeceras urbanas y áreas rurales.

6.7.2.2.3.3. “Para tal fin se trabajó con las proyecciones de población y tasas de crecimiento media anual, según departamentos, 1999 y 1995 - 2015. La información fue tomada de las bases de datos del DANE directamente y se resume e el cuadro siguiente:

6.7.2.2.4. “Proyecciones de Población Total por municipios, según DANE

| Munic  | 1995      | 2000      | 2005      | 2010      | 2015      | Prom  |
|--------|-----------|-----------|-----------|-----------|-----------|-------|
| Bogotá | 5,678,343 | 6,437,842 | 7,185,889 | 7,919,120 | 8,602,814 | 2.08% |
| D. C.  |           |           |           |           |           |       |

6.7.2.2.5. “Información del Plan de Ordenamiento Territorial de Bogotá D. C.

6.7.2.2.5.1 “El Plan de Ordenamiento Territorial de Bogotá D.C., aprobado en el Decreto 619 de julio 28 de 2000, estableció el modelo de desarrollo, las directrices y los mecanismos necesarios para que la ciudad alcance los mejores grados de utilización de sus espacios físicos por los próximos 9 años.

6.7.2.2.5.2. “El estudio de la ciudad, sus áreas, zonas y usos de los suelos, así como la determinación de las zonas de expansión son parte de los temas que el POT contempla y reglamenta. Dentro de este concepto se limitó el uso y aprovechamiento del borde norte de la ciudad, aunque previamente a la aprobación del POT, esta zona estaba considerada como uno de los mayores focos de crecimiento para la ciudad.

6.7.2.2.5.2.3. “Dentro de las políticas adoptadas por el POT para la ciudad, deben resaltarse las incluidas en el artículo 1, donde se hace referencia a la necesidad de desarrollar la ciudad bajo el concepto de región, el cual es definitivo dentro del programa de saneamiento del río Bogotá, velar y promover porque exista un manejo sostenible de los recursos naturales de la ciudad y demás territorios Distritales.

6.7.2.2.5.4. “Las proyecciones de población definidas por el POT de la ciudad se caracterizan por una tendencia a la baja de la tasa de crecimiento, que en la actualidad es de 2.5% anual, pero para el período 2005 a 2010 se espera que llegue a 2.1%, en virtud del crecimiento dinámico de la periferia de la ciudad y el retroceso poblacional de las zonas centrales, bien por el proceso de sustitución de actividades o por obsolescencia de algunas áreas residenciales antiguas, proceso que es

generalizado en las grandes ciudades del mundo. Las cifras de población del POT del Distrito se presentan en el siguiente cuadro:

6.7.2.2.6 “Proyección de Población Total del Distrito Capital, según POT.

| Municipio  | 1997      | 1998      | 1999      | 2000      | 2005      | 2010      |
|------------|-----------|-----------|-----------|-----------|-----------|-----------|
| Bogotá D.C | 6,010,247 | 6,164,494 | 6,322,701 | 6,484,967 | 7,282,785 | 8,089,560 |

6.7.2.2.6.1. “Los datos de esta proyección ajustan bastante bien con la del escenario medio de crecimiento del estudio de TEA-97.

6.7.2.2.7. “Proyecciones Para El Municipio De Soacha

6.7.2.2.7.1. “Estudio de TEA-99

6.7.2.2.7.1.1. “En cuanto a la población del municipio de Soacha, el estudio de TEA-99, también tiene proyecciones de población, las cuales obedecen a criterios similares a los utilizados para las proyecciones de la ciudad de Bogotá D. C., considerando además tendencias regionales de municipios y del departamento. Las cifras que arroja el estudio se presenta en el siguiente cuadro:

6.7.2.2.7.2. “Proyecciones de Población Total Municipio de Soacha, según TEA-99

| Municipio | 1995    | 2000    | 2005    | 2010    | 2015    | 2020    |
|-----------|---------|---------|---------|---------|---------|---------|
| Soacha    | 276,008 | 378,015 | 494,250 | 623,704 | 765,112 | 919,323 |

6.7.2.2.7.3. “Información del DANE

“Las proyecciones de población reportadas por el DANE obedecen a una coherencia entre las poblaciones del departamento y cada uno de los municipios, considerando las tasas históricas de crecimiento. Las cifras que aquí se presentan corresponden a las reportadas por Internet:

6.7.2.2.7.4. “Proyecciones de Población Total por municipios, según DANE

| Municipio | 1995    | 2000    | 2005    |
|-----------|---------|---------|---------|
| Soacha    | 250,404 | 283,889 | 315,880 |

6.7.2.2.7.4.1. “Sin embargo, la publicación "*Bogotá y Cundinamarca. Expansión y Sostenibilidad*", referencia 5, presenta otras cifras del DANE ajustadas, que se muestran a continuación:

6.7.2.2.7.5. “Proyecciones ajustadas de Población Total por municipios, según DANE

| Municipio | 1995    | 2000    | 2005    |
|-----------|---------|---------|---------|
| Soacha    | 280,181 | 341,394 | 409,724 |

6.7.2.2.7.6. Información de la Gobernación de Cundinamarca

6.7.2.2.7.6.1. “En un estudio de agrupación regional de municipios realizado internamente por la Gobernación de Cundinamarca, se

efectuaron dos proyecciones de población correspondientes a dos escenarios distintos. El primero de ellos considera la proyección de la población dentro del conjunto regional de municipios del departamento y el segundo, considera al municipio como un ente independiente, con lo cual se formularon los criterios de crecimiento, sin embargo, los resultados de ambos ejercicios coinciden en las cifras, las cuales se presentan en el cuadro siguiente:

6.7.2.2.7.7. “Proyecciones de Población Total Municipio de Soacha, según Gobernación de Cundinamarca. (Ejercicio de proyección interno, no ha sido reportado en publicaciones)

| Municipio | 2000    | 2005    | 2010    | 2015    | 2020    |
|-----------|---------|---------|---------|---------|---------|
| Soacha    | 378,015 | 494,250 | 585,096 | 668,380 | 739,408 |

6.7.2.2.7.8. Información del Plan Maestro de Alcantarillado de Soacha

6.7.2.2.7.8.1. “El Estudio del Plan Maestro de Alcantarillado de Soacha, referencia 4, presenta un análisis demográfico profundo, que se basa en el seguimiento del crecimiento espacial del municipio a través del tiempo por medio de fotografías aéreas, lo cual fue integrado con los análisis de las variables de fecundidad, mortalidad y migración, y las directrices de espacio del POT del municipio.

6.7.2.2.7.8.2. “El estudio detectó por medio de las aerofotografías que en el año de 1993 se presentó un punto de quiebre de los índices de crecimiento de la población, en virtud de que el crecimiento espacial prácticamente se estancó desde ese año hasta el 2000, lo cual incide notoriamente en las proyecciones hacia el futuro.

6.7.2.2.7.8.3. Al respecto, en el informe se menciona que “el crecimiento aumentó entre los años 1973 y 1985, sin embargo en el último período intercensal de 1985 a 1993 esta tendencia empezó a reducirse, y se hizo más evidente después de 1993.

6.7.2.2.7.8.4. Considera, además, el estudio que “la migración ha sido el factor determinante del crecimiento de Soacha desde 1973 a 1993, y en ello se basa para establecer la proyección de la población hasta el año 2020 y la saturación, en un escenario que denomina de migración decreciente o escenario medio que propone una reducción paulatina de los volúmenes de migración desde los niveles de 1985-1993 hasta que éstos sean cero en el año 2020.

**6.7.2.3. “Proyecciones de Población Total Municipio de Soacha, según Estudio del Plan Maestro de Alcantarillado de Soacha, por Estudios Técnicos. Año 2001**

| Municipio | 2000    | 2005    | 2010    | 2015    | 2020    | SATURAC IÓN |
|-----------|---------|---------|---------|---------|---------|-------------|
| Soacha    | 353,026 | 434,528 | 506,890 | 568,670 | 617,775 | 793,255     |

6.7.2.3.1. “Plan de Ordenamiento Territorial de Soacha

6.7.2.3.1.1. “De acuerdo con el Estudio de la referencia 4, el POT del municipio reporta las proyecciones que se basan en una población inicial de 480,000 habitantes en el año 1998, considerando un crecimiento de población superior al 100% respecto a los conteos realizados en 1993 y 1996. Las cifras de este documento se muestran en el siguiente cuadro:

6.7.2.3.1.2. “Proyecciones de Población Total Municipio de Soacha, según POT del municipio.

| Municipio | 1998    |
|-----------|---------|
| Soacha    | 480,000 |

**6.7.2.4. Análisis de Tendencias de Población**

6.7.2.4.1. Generalidades

6.7.2.4.1.1. “Este ejercicio no pretende desvirtuar los esfuerzos realizados hasta ahora en la difícil labor de establecer las proyecciones de población, sin embargo, recomienda adoptar aquellas tendencias más consistentes a la luz de las metodologías y análisis efectuados en el desarrollo de cada una ellas.

6.7.2.4.1.2. “Adicionalmente para el análisis se presenta la propuesta de proyección de población de la UT para la ciudad de Bogotá.

6.7.2.4.2. Proyección de Población Obtenida por la Unión Temporal

6.7.2.4.2.1. “Debido a que las cifras del Estudio de Estimación de la Producción de Aguas Residuales de Hidroestudios se encontraban en proceso en el momento de la elaboración de este informe, la Unión Temporal realizó un ejercicio similar de distribución de la población de Guaymaral a partir de la base de TEA-99, teniendo en cuenta los siguientes aspectos:

6.7.2.4.2.2. “Los límites precisos de las cuencas definidos para Torca, Salitre y Fucha por Hidroestudios, y para Tunjuelo por IC ingenieros consultores, de acuerdo con los estudios de las referencias 2 y 3.

- “La subcuenca Tintal forma parte de las cuencas de Fucha y Tunjuelo.
- La población por distribuir es la excluida en el borde norte y que según la restricción del POT queda por fuera del límite definido para la cuenca de Torca.
- “El margen de saturación disponible de los sectores no excluidos, por estratos, debe albergar proporcionalmente la población que tendría lugar en los sectores excluidos del borde norte.
- “Luego de la distribución de población de Guaymaral en el resto de las cuencas, en ningún sector censal de éstas se supera la densidad poblacional prevista inicialmente.

6.7.2.4.2.3. “Adicionalmente, es necesario indicar que la base de datos de TEA-99 agrupa los 6 estratos socioeconómicos existentes en la ciudad en tres categorías, en razón de la similitud en las costumbres de consumo de agua:

- “El estrato bajo agrupa a los estratos socioeconómicos 1, 2 y 3
- “El estrato medio corresponde al estrato socioeconómico 4
- El estrato alto agrupa a los estratos socioeconómicos 5 y 6

“De acuerdo con los anteriores criterios se estableció la población excluida de Guaymaral por distribuir en las otras tres cuencas, discriminada por estratos como se muestra en el siguiente cuadro:

6.7.2.4.3. “Población a 2020 y saturación por distribuir, discriminada por estratos, según UT. Límites sanitarios precisos.

| ESTRATO      | Por distribuir a 2020 | Por distribuir a saturación | Margen de saturación de las otras cuencas |
|--------------|-----------------------|-----------------------------|-------------------------------------------|
| Bajo         | 375,821               | 377,495                     | 1,034,249                                 |
| Medio        | 226,209               | 326,823                     | 330,636                                   |
| Alto         | 257,846               | 258536                      | 96,223                                    |
| <b>TOTAL</b> | <b>859,876</b>        | <b>962,853</b>              | <b>1,461,109</b>                          |

6.7.2.4.3.1. “La cifra de población por distribuir es distinta de la del Cuadro 2.2 debido a las diferencias en los límites sanitarios utilizados en cada ejercicio, tal como se explicó anteriormente.

6.7.2.4.3.2. “Según el Cuadro 2.11, los sectores censales de Guaymaral restringidos por el POT tendrían una capacidad a saturación de 962,853 habitantes, que finalmente es la capacidad de ocupación que la ciudad pierde a largo plazo, debido a que el resto de la ciudad mantiene constante su capacidad saturación o su máxima densidad poblacional.

6.7.2.4.3.3. “En el mismo cuadro se aprecia que la población de estrato alto por redistribuir es mayor que el margen de saturación disponible en el resto de la ciudad, por lo que es necesario que migre hacia zonas de estratos medio y luego hacia zonas de estrato bajo, en donde el margen de saturación es mayor. Lo anterior indica que los primeros sectores en llegar a la saturación serán los de estratos altos y luego los de estrato medio, circunstancia que fue considerada en el ejercicio de distribución, cuyos resultados se presentan a continuación:

6.7.2.4.4. “Población a 2020 y saturación por estratos con  
distribución de población de Guaymaral

| Cuenca         | Estrato | 2000      | 2020 antes de distribuir | 2020 después de distribuir | Saturación |
|----------------|---------|-----------|--------------------------|----------------------------|------------|
| Torca          | Bajo    | 67,533    | 90,006                   | 95,511                     | 103,153    |
|                | Medio   | 43,353    | 66,809                   | 123,826                    | 123,826    |
|                | Alto    | 12,482    | 54,747                   | 56,749                     | 56,749     |
| Total Torca    |         | 123,368   | 211,562                  | 276,086                    | 283,728    |
| Salitre        | Bajo    | 1,220,445 | 1,683,195                | 1,774,900                  | 1,902,226  |
|                | Medio   | 427,827   | 507,117                  | 726,468                    | 726,468    |
|                | Alto    | 266,462   | 302,506                  | 394,511                    | 394,511    |
| Total Salitre  |         | 1,914,734 | 2,492,818                | 2,895,878                  | 3,023,206  |
| Fucha          | Bajo    | 2,057,044 | 2,606,069                | 2,852,669                  | 3,195,068  |
|                | Medio   | 220,424   | 233,173                  | 287,442                    | 287,442    |
|                | Alto    | 9,722     | 11,549                   | 13,765                     | 13,765     |
| Total Fucha    |         | 2,287,190 | 2,850,791                | 3,153,876                  | 3,496,275  |
| Tunjuelo       | Bajo    | 2,117,626 | 3,209,748                | 3,298,957                  | 3,422,820  |
|                | Medio   | 0         | 0                        | 0                          | 0          |
|                | Alto    | 0         | 0                        | 0                          | 0          |
| Total Tunjuelo |         | 2,117,626 | 3,209,748                | 3,298,957                  | 3,422,820  |

6.7.2.2.4.4.1. “Al restringir la capacidad de saturación de la ciudad y distribuir la población que tendría cabida en Guaymaral, la saturación de las demás cuencas se alcanzará antes.

6.7.2.2.4.4.2. “El siguiente cuadro presenta la proyección de población total con la población de Guaymaral distribuida en el resto de la ciudad:

“Proyecciones de Población Total con distribución de población de  
Guaymaral

| Municipio  | 2000      | 2005      | 2010      | 2015      | 2020      | Saturación |
|------------|-----------|-----------|-----------|-----------|-----------|------------|
| Bogotá D.C | 6,442,910 | 7,306,288 | 8,034,129 | 8,781,309 | 9,624,797 | 10,226,029 |

6.7.2.4.5. “Tendencias para Bogotá D. C.

“Para efectuar un análisis de las tendencias de población de la Ciudad de Bogotá D.C., se resumieron las cifras de las distintas proyecciones incluyendo la obtenida por la UT en el Cuadro 2.14 y en la Figura 2. 1.

6.7.2.4.6. “Proyecciones de Población Total de Bogotá D. C., según  
diferentes fuentes

| AÑO        | TEA-97<br>ALTO | TEA-97<br>MEDIO | TEA-97<br>BAJO | TEA-99 SIN<br>POT | UT CON<br>POT | DANE      |
|------------|----------------|-----------------|----------------|-------------------|---------------|-----------|
| 1999       | 6,389,740      | 6,322,692       | 6,260,485      |                   |               |           |
| 2000       | 6,567,225      | 6,484,955       | 6,409,012      | 6,533,969         | 6,442,910     | 6,437,842 |
| 2005       | 7,481,774      | 7,282,771       | 7,109,570      | 7,295,254         | 7,306,288     | 7,185,889 |
| 2010       | 8,458,294      | 8,086,529       | 7,781,364      | 8,055,865         | 8,034,129     | 7,919,120 |
| 2015       | 9,486,911      | 8,878,549       | 8,407,853      | 8,831,113         | 8,781,303     | 8,602,814 |
| 2020       | 10,344,899     | 10,040,718      | 9,805,370      | 9,600,418         | 9,624,797     |           |
| Saturación | 11,202,886     | 11,202,886      | 11,202,886     | 11,165,190        | 10,226,029    |           |

6.7.2.4.6.1. “En este cuadro y su Figura 2.1 respectiva, se aprecia que todas las proyecciones tienen unos rangos de variación no muy notorios y se puede afirmar que las tendencias son similares.

6.7.2.4.6.2. “Sin embargo, se observa una diferencia en los topes de saturación de los análisis que ofrecen este escenario, es decir el estudio de TEA-99 que alcanza la cifra de 11'165.190 habitantes, versus el ejercicio de la Unión Temporal con el ajuste al POT-2000 que alcanza los 10'226.029 habitantes.

6.7.2.4.6.3. “Dado que las tendencias hasta el año 2020 son similares y que las proyecciones hechas en el escenario POT medio de TEA-99 incorporan en su concepción las políticas de crecimiento impuestas por el POT, se recomienda adoptar la proyección de población ajustada del POT del 2000, obtenida por la Unión Temporal.

#### 6.7.2.4.6.7. “Sensibilización del Límite de Saturación de Bogotá

6.7.2.4.6.7.1. “Debido a la posibilidad de que las restricciones sobre el borde norte puedan cambiar luego de cumplirse la vigencia del POT en el año 2009, es necesario sensibilizar el límite de saturación de la ciudad.

6.7.2.4.6.7.2. “Al respecto se prevé que la actual restricción de desarrollo del borde norte puede generar el crecimiento de asentamientos subnormales o ilegales en esta zona en el mediano plazo, por la escasez de tierras en el resto de las cuencas. “Esta situación indeseable se puede constituir en un punto de presión importante para la liberación parcial o total de la restricción que fue impuesta por el Ministerio del Medio Ambiente al POT Distrital:

- “Después de que el POT termine su vigencia en el año 2009 se mantiene la restricción del borde norte, con lo cual se tendría una población de saturación de 10.226.029 habitantes, luego de redistribuir el sector de Guaymaral, según el ejercicio de la UT.
- “Después de que el POT termine su vigencia en el año 2009 se libera totalmente la restricción del borde norte, con lo cual se tendría una población de saturación de 11,165,190 habitantes, según el estudio de TEA-99 en el escenario POT medio, con los límites de cuencas determinados por los estudios de las referencias 2 y 3.
- “Si se consideran las dos anteriores como situaciones extremas, en una situación intermedia en el año 2009 el POT liberaría parcialmente la restricción del borde norte, con lo cual se llegaría a una población de saturación de 10.684.161 habitantes.

6.7.2.4.6.7.3. “Como se aprecia, las hipótesis de saturación planteadas presentan un margen de variación máximo de 10% entre los valores extremos y de 5% respecto a la hipótesis media.

6.7.2.4.6.7.4. “Por otra parte, es posible que ocurran redensificaciones en el escenario vigente con restricción del borde norte, las cuales pueden generar incrementos de población que se acerquen a las hipótesis de liberación del borde norte parcial o totalmente, como se planteó anteriormente.

#### 6.7.2.4.6.8. Tendencias para el Municipio de Soacha

“Por su parte, para el municipio de Soacha se siguió el mismo procedimiento a fin de observar las distintas proyecciones. Para ello se elaboraron el Cuadro 2.15 y la Figura 2.3.

6.7.2.4.6.9. “Proyecciones de Población del municipio de Soacha,  
según diferentes fuentes

| AÑO        | PMALC<br>E.T. 2001 | GOBERN.RE<br>GION | GOBIERN.AI<br>SLADO | TEA-99  | DANE    | DANE<br>AJUSTADA |
|------------|--------------------|-------------------|---------------------|---------|---------|------------------|
| 19.95      |                    |                   |                     |         | 250,404 | 280,182          |
| 2000       | 353,026            | 378,015           | 378,015             | 378,015 | 283,889 | 341,394          |
| 2005       | 434,528            | 494,250           | 494,250             | 494,250 | 315,880 | 409,724          |
| 2010       | 506,890            | 585,096           | 585,096             | 623,704 |         |                  |
| 2015       | 568,670            | 668,380           | 668,380             | 765,112 |         |                  |
| 2020       | 617,775            | 739,408           | 1 739,408           | 919,323 |         |                  |
| Saturación | 793,255            |                   | 1                   |         |         |                  |

6.7.2.4.6.9.1. “El Cuadro 2.15 y la Figura 2.3 respectiva, muestran una gran dispersión en las tendencias de las distintas proyecciones, con valores que fluctúan entre 617,000 y 920.000 habitantes aproximadamente en el año 2020, que son aproximadamente el doble y el triple de la población actual.

6.7.2.4.6.9.2. “Sin embargo para profundizar en los detalles de éste se recomienda consultar directamente el mencionado estudio.

6.7.2.4.6.9.3. Dan cuenta dichas investigaciones, que el modelo fue alimentado con los resultados de dos campañas de muestreos de calidad de agua con medición de caudal realizados en diversos puntos de la red de alcantarillado de la ciudad, principalmente en canales y en algunos colectores, que permitieron conocer las condiciones de calidad en tiempo seco y durante eventos lluviosos en varios de estos puntos.

6.7.2.4.6.9.4. Adicionalmente, se indica que el modelo tuvo en cuenta los registros de precipitación de múltiples estaciones de lluvias

localizadas en las cuencas, que permitieron hacer el seguimiento de los eventos en los sistemas de alcantarillado día a día durante un período de simulación de 13 años, utilizando los resultados de la calibración del modelo PCSWWM. Esta calibración se efectuó para un año de eventos y sus resultados se utilizaron para predecir la escorrentía generada por las lluvias de los demás años.

6.7.2.4.6.9.5. Se indica igualmente, que “el modelo determinó los caudales que ingresaron a los canales directamente por los colectores de sistemas pluviales así como por los aliviaderos de los sistemas combinados. Además, se estableció el efecto en la calidad del agua por el arrastre de material que se deposita en las calles y que es llevado al alcantarillado durante los eventos lluviosos.

6.7.2.4.6.9.6. Se afirma que “el modelo tuvo en cuenta el componente hidrológico de los cerros de la ciudad en todos los eventos lluviosos de los 13 años.

6.7.2.4.6.9.7. Por último, se expresa que “para completar el modelo se consideraron los caudales sanitarios teniendo en cuenta la infiltración, y las cargas producidas por las aguas residuales que generan las cuencas en el año 2001 con una concentración típica de 230mg/l, de acuerdo con los resultados del producto 3 del mismo estudio, denominado estimación de los caudales de aguas residuales.

6.7.2.4.6.9.8. *Se finaliza diciendo que “de la interacción de los anteriores componentes se obtuvieron los volúmenes promedios de agua producida que fluyeron a través de las redes, canales y ríos de la ciudad, entre los años 1988 y 2000, que se presentan de manera resumida en el siguiente cuadro:*

**“Volumen de Escorrentía por el Sistema de Alcantarillado**  
**Promedio período 1988-2000**

| CUENCA         | Agua Sanitaria<br>Mm3 - año | Agua Lluvia<br>Urbana<br>Mm3 – año | Agua Lluvia<br>Rural<br>Mm3 – año | Total<br>Mm3 – año |
|----------------|-----------------------------|------------------------------------|-----------------------------------|--------------------|
| <i>SALITRE</i> | 112                         | 34                                 | 20                                | 166                |
| <i>FUCHA</i>   | 142                         | 28                                 | 28                                | 198                |

“Información tomada del producto 4 del estudio de la referencia 2.

(\*) *La cuenca de Salitre no incluye la de Torca*

**6.7.2.5. Conexiones de lluvias según la Unión Temporal**

6.7.2.5.1. “Los resultados del modelo descrito en el numeral anterior sirven como criterio para la estimación los aportes de aguas lluvias al sistema de alcantarillado. Por ello, la UT efectuó algunos ajustes a los datos del cuadro anterior utilizando los volúmenes de agua sanitaria, es decir agua residual y de infiltración del año 2000, de acuerdo con las proyecciones propuestas.

6.7.2.5.2. “Adicionalmente por medios indirectos se obtuvieron datos que sirven de referencia para la cuenca de Tunjuelo, la cual requiere un análisis a través del tiempo similar al efectuado en las otras dos cuencas.

6.7.2.6. “Volumen de Escorrentía por el Sistema de Alcantarillado  
Promedio período 1988-2000

| CUENCA          | Agua Sanitaria<br>Mm <sup>3</sup> - año | Agua Lluvia<br>Urbana<br>Mm <sup>3</sup> - año | Agua Lluvia<br>Rural<br>Mm <sup>3</sup> – año | Total<br>Mm <sup>3</sup> - año |
|-----------------|-----------------------------------------|------------------------------------------------|-----------------------------------------------|--------------------------------|
| <i>SALITRE</i>  | <i>138</i><br><i>72%</i>                | <i>34</i><br><i>17%</i>                        | <i>20</i><br><i>11%</i>                       | <i>192</i><br><i>100%</i>      |
| <i>FUCHA</i>    | <i>177</i><br><i>- 76%</i>              | <i>28</i><br><i>12%</i>                        | <i>28</i><br><i>12%</i>                       | <i>234</i><br><i>100%</i>      |
| <i>TUNJUELO</i> | <i>151</i><br><i>68%</i>                | <i>16</i><br><i>7%</i>                         | <i>57</i><br><i>25%</i>                       | <i>224</i><br><i>100%</i>      |
| <b>TOTAL.</b>   | <b>466</b>                              | <b>78</b>                                      | <b>105</b>                                    | <b>650</b>                     |

“Información tomada del producto 4 del estudio de la referencia 2, ajustada y complementada por UT.

(\*) *La cuenca de Salitre incluye la de Torca y la de Tunjuelo la de Soacha*

6.7.2.6.1. “Como *se* ve en el cuadro anterior y lo indica el producto 4 de HE, el volumen de agua lluvia es un porcentaje bajo respecto del volumen de agua residual, que está entre el 68% y 76% del volumen total de escorrentía.

6.7.2.6.2. “Se considera que parte de la escorrentía de la lluvia urbana llega a los colectores finales y emisarios y otra parte rebosa por las estructuras de alivio, que junto con el agua rural fluye por los canales, que obviamente no drenan a los colectores finales o emisarios y por lo tanto no llegarían a las plantas de tratamiento.

6.7.2.6.3. “El criterio propuesto por la UT consiste en considerar que el 80% del volumen de aguas lluvias urbanas será admitido en las redes

sanitarias y el 20% restante correspondiente a grandes picos serán vertidos por las estructuras de alivio hacia los canales. De acuerdo con lo anterior, para estimar el caudal por conexiones de lluvias que llegarían a las plantas de tratamiento, se tendría la siguiente proporción respecto al volumen de aguas sanitarias, que a su vez se puede interpretar en términos de caudales como se muestra en el siguiente cuadro:

6.7.2.7. “Porcentaje de conexión de aguas lluvias.

| CUENCA   | Volumen Agua Sanitaria tiempo seco (1)<br>Mm <sup>3</sup> –año | Volumen Aportes Lluvia (2)=0.8 Lluv.Urb<br>Mm <sup>3</sup> -año | Volumen Sanitario Total (1)+(2)=(3)<br>Mm <sup>3</sup> -año | 100 - (3)1(1) =<br>Aporte lluvia en % de Agua Sanitaria |
|----------|----------------------------------------------------------------|-----------------------------------------------------------------|-------------------------------------------------------------|---------------------------------------------------------|
| SALITRE  | 138                                                            | 27                                                              | 165                                                         | 19.4                                                    |
| FUCHA    | 177                                                            | 22                                                              | 199                                                         | 12.8                                                    |
| TUNJUELO | 151                                                            | 13                                                              | 164                                                         | 8.4                                                     |

6.7.2.7.1. “Por otra parte, en cuanto a los aportes de aguas lluvias desde el punto de vista de los caudales pico que ingresan a los conductos, es necesario revisar el concepto de dilución.

6.7.2.7.2. “La dilución es la relación entre el peso o volumen de un material determinado y el peso o volumen del líquido que lo contiene. Desde esta perspectiva, las aguas residuales puras tienen cargas contaminantes diluidas, normalmente expresadas en términos de rng/L de DB05, que en este caso representa un índice de carga que contamina las aguas.

6.7.2.7.3. “Al recibir las aguas de infiltración, las aguas residuales se transforman en aguas sanitarias de tiempo seco, disminuyendo su concentración en virtud de la dilución que se presenta al cambiar la relación de carga de DBO, que se mantiene constante, mientras que el volumen de agua aumenta.

6.7.2.7.4. “Este caudal sanitario de tiempo seco es la variable que se ha venido utilizando como base para dimensionar los conductos sanitarios, considerando además una fracción adicional para estimar los aportes de aguas lluvias. Sin embargo, esta fracción es muy difícil de determinar puesto que su magnitud depende a su vez de otras variables, de difícil cuantificación.

6.7.2.7.5. “Por lo anterior, es más conveniente plantear el dimensionamiento de los colectores no tratando de estimar las conexiones de aguas lluvias que fluirían por éstos sino estableciendo una condición de funcionamiento que le permita recibir los aportes de aguas lluvias necesarios, que al colmar la capacidad del conducto le proporcionen una calidad de agua, por medio de la dilución de las aguas sanitarias, tal que puedan ser vertidas a través de aliviaderos a los cuerpos receptores a partir de ese momento, cumpliendo con las restricciones ambientales al respecto.

6.7.2.7.6. “El caudal para lograr la dilución aceptable desde el punto de vista ambiental es el mayor entre 5 veces el caudal medio de agua sanitaria de tiempo seco, y 2 veces la suma del caudal máximo horario y el de infiltración, que se pueden expresar de la siguiente forma:

6.7.2.8. “Carga Contaminante En Distintos Puntos De La Ciudad

| PUNTO DE MEDICION                  | I         | MEDICIONES (5) |        |       |         |         | CARGA PER PER  |               | Q AGUA RESIDUAL |              |                       |           |            |            |              | CONCENTRACION  |            | DBO        | CONCENTRACION |               |  |  | N SST |
|------------------------------------|-----------|----------------|--------|-------|---------|---------|----------------|---------------|-----------------|--------------|-----------------------|-----------|------------|------------|--------------|----------------|------------|------------|---------------|---------------|--|--|-------|
|                                    |           | Cí máx         | Cí mín | Qmed  | DBOS    | SST     | DBOS<br>percap | SST<br>percáp | Q med<br>domést | Q<br>infiltr | Q (domi<br>+ infiltr) | Ornedido  | DBO<br>máx | DBO<br>mín | DBO<br>media | DBO<br>medicia | SST<br>máx | SST<br>mín | SST<br>media  | SST<br>Medida |  |  |       |
|                                    |           |                |        |       |         |         |                |               |                 |              |                       |           |            |            |              |                |            |            |               |               |  |  |       |
|                                    |           |                |        |       |         |         |                |               |                 |              |                       |           |            |            |              |                |            |            |               |               |  |  |       |
|                                    | 99        | Ips            | Ips    | Ips   | Kg/clia | kgidia  | g/hab-día      | g/hab-día     | (1)             | (2)          | ml/i;                 | Clresici) | ing/l      | M9/l       | M9/1         | Prom           | frig/l     | mgll       | mgll          | Prom          |  |  |       |
| Estación Villa Gladis              | 40,826    | 240            | 36     | 58    | 1,267   | 980     | 31             | 24            | 0.06            | 0.03         | 0.09                  | -48%      |            |            | 254          | 230            |            |            | 196           | 304           |  |  |       |
| Estación Villa Gladis              | 40,826    | 93             | 93     | 93    | 1,724   | 2,976   | 42             | 73            | 0.06            | 0.03         | 0.09                  | 8%        |            |            | 215          |                |            |            | 371           |               |  |  |       |
| Descarga Humedal Jaboque           | 40,826    | 227            | 171    | 198   | 343     | 299     | 8              | 7             |                 |              |                       |           |            |            | 20           | 19             |            |            | 17            | 15            |  |  |       |
| Descarga Humedal Jaboque           |           | 61             | 53     | 56    | 66      | 34      | 2              | 1             |                 |              |                       |           |            |            | 14           |                |            |            | 7             |               |  |  |       |
| PTAR Salitre (*)                   | 1,937,782 | 9,785          | 2,395  | 4,889 | 78,446  | 171,347 | 40             | 88            |                 |              |                       |           |            |            | 186          |                |            |            | 406           |               |  |  |       |
| Interceptor Tibabuyes Occidental   |           | 184            | 33     | 98    | 3,971   | 10,329  |                |               |                 |              |                       |           |            |            | 469          |                |            |            | 1221          |               |  |  |       |
| Canal de aguas lluvias Salitre (*) | 1,937,782 | 4,925          | 1,812  | 3,111 | 22,879  | 46,543  | 12             | 24            |                 |              |                       |           |            |            | 85           |                |            |            | 173           |               |  |  |       |
| SubTotal Salitre                   |           | 14,893         | 4,240  | 8,098 | 105,296 | 228,219 | 54             | 118           | 2.7             | 18           | 4.6                   | 44%       | 171        | 111        |              | 150            | 277        | 180        |               | 422           |  |  |       |
| PTAR Salitre                       | 1,937,782 | 5,720          | 1,720  | 3,473 | 88,774  | 100,554 | 46             | 52            |                 |              |                       |           |            |            | 296          |                |            |            | 335           |               |  |  |       |
| Interceptor Tibabuyes Occidental   |           | 117            | 26     | 80    | 1,968   | 1,027   |                |               |                 |              |                       |           |            |            | 284          |                |            |            | 148           |               |  |  |       |
| Canal de aguas lluvias Salitre     | 1,937,782 | 1,549          | 243    | 969   | 10,390  | 10,622  | 5              | 5             |                 |              |                       |           |            |            | 124          |                |            |            | 127           |               |  |  |       |
| SubTotal Salitre                   |           | 7,385          | 1,989  | 4,523 | 101,132 | 112,203 | 52             | 58            | 2.7             | 1.8          | 4.6                   | -11%      | 327        | 35         |              | 259            | 325        | 35         |               | 331           |  |  |       |
| Estación de Bombeo de Fontibón (*) | 191,857   | 2,117          | 498    | 1,015 | 38,046  | 20,025  | 198            | 104           | 0.3             | 0.3          | 0.5                   | 50%       |            |            | 434          | 361            |            |            | 228           | 207           |  |  |       |
| Estación de Bombeo de Fontibón     | 191,857   | 1,162          | 498    | 826   | 19,314  | 12,948  | 101            | 67            | 0.3             | 0.3          | 0.5                   | 39%       | -          |            | 271          |                |            |            | 181           |               |  |  |       |
| Interceptor de; Sur                | 331,545   | 937            | 285    | 625   | 19,722  | 14,126  | 59             | 43            | 0.4             | 0.2          | 0.7                   | -7%       |            |            | 365          | 370            |            |            | 262           | 297           |  |  |       |
| Interceptor de; Sur                | 331,545   | 937            | 274    | (540  | 20,735  | 18,358  | 63             | 55            | 0.4             | 0.2          | 0.7                   | -4%       |            |            | 375          |                |            |            | 332           |               |  |  |       |
| Interceptor de Kennedy             | 145,202   | 591            | 148    | 403   | 8,743   | 7,476   | 60             | 51            | 0.2             | 0.1          | 0.3                   | 20%       |            |            | 251          | 260            |            |            | 215           | 202           |  |  |       |
| Interceptor de Kennedy             | 331,545   | 460            | 139    | 372   | 8,650   | 6,076   | 60             | 42            | 0.4             | 0.1          | 0.6                   | -52%      |            |            | 269          |                |            |            | 189           |               |  |  |       |
| Río Fucha (*) (Pte E.B.Font) (3)   | 1,803,310 | 9' 363         | 3,156  | 6,643 | 119,694 | 218,435 | 66             | 121           | 2.4             | 2.0          | 4.4                   | 34%       |            |            | 209          | 234            | 430        | 194        | 381           | 260           |  |  |       |
| Río Fucha (Pte E.B.Font) (3)       | 1,803,310 | 7,127          | 3,140  | 5,843 | 133,160 | 62,520  | 74             | 35            | 2.4             | 2.0          | 4.4                   | 25%       |            |            | 264          | 136            | 67         | 124        |               |               |  |  |       |
| Río Fucha (*) (4)                  | 1,995,167 | 11,480         | 3,654  | 7,658 | 157,740 | 238,460 |                | 120           | 2.6             | 2.3          | 4.9                   | 36%       | 272        | 127        | 238          |                | 412        | 191        | 360           | 254           |  |  |       |
| Río Fucha (4)                      | 1,995,167 | 8,289          | 3,638  | 6,669 | 152,474 | 75,468  | 76             |               |                 |              |                       |           | -M         | 149        | 265          |                | 144        | 74         | 131           |               |  |  |       |
| Est Bombeo Grancolombiano          | 266,025   | 720            | 540    | 543   | 19,730  | 16,991  | 74             | 64            | 0.3             | 0.1          | 0.5                   | 13%       |            |            | 421          | 381            | 390        | 362        | 362           | 382           |  |  |       |
| Est Bombeo Grancolombiano          | 266,025   | 930            | 270    | 554   | 16,318  | 19,148  | 61             | 72            | 0.3             | 0.1          | 0.5                   | 15%       |            |            | 341          |                | 450        | 271        | 400           |               |  |  |       |
| Interceptor Tunjuelo Medio         | 471' 517  | 695            | 281    | 533   | 20,573  | 13,623  | 43             | 29            | 0.6             | 0.3          | 0.9                   | -66%      |            |            | 447          | 399            | 371        | 9          | 296           | 361           |  |  |       |
| Interceptor Tunjuelo Medi          | 476' 517  | 785            | 391    | 593   | 18,248  | 21,505  | 38             | 45            | 0.6             | 0.3          | 0.9                   | -49%      |            |            | 356          |                | 509        | 229        | 420           |               |  |  |       |
| Río Tunjuelo                       | 2,117,618 | 8,987          | 3,881  | 5,515 | 116,922 | 543,892 | 55             | 257           | 2.7             | 2.0          | 4.7                   | 14        | 300        | 186        | 245          | 234            | 1394       | 866        | 1141          | 747           |  |  |       |
| Río Tunjuelo                       | 2,117,618 | 5,377          | 3,815  | 4,622 | 88,190  | 110,430 | 42             | 52            | 2.7             | 2.0          | 4.7                   |           |            |            | 221          |                | 306        | 232        | 277           |               |  |  |       |
| Prom Ponderado Tunjuelo            |           |                |        |       |         |         | 50             | 52            |                 |              |                       |           |            |            |              |                |            |            |               |               |  |  |       |

“Qdiseño = 2 \* (Qinf + Qmáx) 6 5 \* Qm,

“donde *Q diseño* es el caudal de operación en la condición de diseño del conducto, *Qinf* es el Caudal de infiltración máximo, *Qmáx* es el caudal máximo horario estimado a partir del caudal medio de agua residual y *Qm* es el caudal medio de agua residual, lo cual se denomina criterio ambiental.

6.7.3. “USOS Y ESTÁNDARES DE CALIDAD DEL RÍO BOGOTÁ  
(Prueba aportada por la EAAB sobre la investigación en la materia que adelantó la Unión temporal de Saneamiento del Río Bogotá, agosto de 2002. Ver el cuaderno respectivo)

### 6.7.3.1. “MARCO CONCEPTUAL DE LA SOSTENIBILIDAD

#### 6.7.3.1.1. “La Sostenibilidad

##### 6.7.3.1.1.1. “Consideraciones Básicas

6.7.3.1.1.1.1. “El concepto de sostenibilidad es algo que está incluido prácticamente en casi todas las propuestas políticas y programas tanto en el sector público como en el privado. Es difícil de definir por su naturaleza en cuanto está sometida a una carga ideológica y emocional que puede variar mucho entre sociedades diversas y de una persona a otra.

6.7.3.1.1.1.2. “Puede definirse como un balance dinámico entre tres elementos interdependientes: 1. La protección y mejora de los recursos y los ecosistemas naturales; 2. La productividad económica y 3. La provisión de infraestructura social como empleo, vivienda, educación, atención médica y oportunidad cultural (Dominski et al 1192)

##### 6.7.3.1.1.2. “La sostenibilidad fuerte y la sostenibilidad débil

6.7.3.1.1.2.1. “Si una actividad produce vertimientos contaminantes a una corriente de agua, dirán que esta actividad es sostenible si su resultado económico es mayor que el costo de descontaminar el agua, aunque ni siquiera se tenga en cuenta el valor completo de los componentes y servicios ambientales que la corriente de agua presta en su cuenca.

6.7.3.1.1.2.2. “Por el contrario, la visión de la "Sostenibilidad Fuerte, que pudiéramos llamar ecologista", sostiene que la equivalencia y la intercambiabilidad entre los diversos capitales no es tan sencilla ni tan

automática, y que si el Capital Natural se explota más allá de ciertos límites, su valor y sus servicios no son recuperables y se entra en una tendencia de degradación del ecosistema que hace que la calidad de la vida y las posibilidades de progreso se reduzcan e incluso que se extingan.

6.7.3.1.1.2.3. “Los límites que la visión de la “Sostenibilidad Fuerte” impone al uso de los recursos naturales y servicios ambientales, están dictados por la capacidad de la naturaleza para reproducirse a para autopurificarse y absorber o eliminar la contaminación de los componentes ambientales. Así si un bosque se explota a una tasa de extracción superior a su capacidad de regeneración, se estará consumiendo el Capital Natural mas allá de lo que pudiéramos llamar los rendimientos” de este capital, lo que implica desde fuego un empobrecimiento.

6.7.3.1.1.2.4. “En el caso de los vertimientos a un río, de la misma manera, si la magnitud de la carga contaminante es tal que supera con creces la capacidad de autopurificación, natural, éste irá deteriorándose y perdiendo su capacidad de ofrecer agua con una calidad aceptable para diversos usos, agrícolas, industriales, otros recursos naturales como peces y desde luego los servicios ambientales. Este deterioro puede afectar grandes extensiones de terreno y poblaciones y actividades importantes en la cuenca del río.

6.7.3.1.1.2.5. “Así pues la diferencia fundamental entre estas dos aproximaciones a la sostenibilidad radica en que la Sostenibilidad Débil asume que el Capital Natural es completamente intercambiable con otras formas de capital, mientras que la Sostenibilidad Fuerte considera que esta posibilidad de sustitución es limitada y que estos límites están dados por la capacidad de carga y por la resiliencia de la naturaleza

#### 6.7.3.1.2. “REACTIVIDAD Y PROACTIVIDAD

6.7.3.1.2.1. “Hasta el presente la política y la gestión ambiental en Colombia han sido fundamentalmente reactivas. No ha existido una capacidad de planificación preventiva que permita evitar los impactos ambientales y nos hemos limitado a tratar **de remediar los efectos de nuestra** actividad sobre el ambiente con soluciones de tipo "final de tubo" en el mejor de los casos. Hemos carecido, en este como en otros campos, de capacidad anticipatoria y de visión de largo plazo.

6.7.3.1.2.2. “Es posible que la actitud reactiva provenga de la necesidad de recuperar los enormes daños que hemos causado a nuestro medio ambiente a lo largo de los cinco siglos en que nos hemos dedicado a expoliar la naturaleza, en especial durante los últimos 50 años, en que hemos afectado grandemente el equilibrio y la calidad de nuestros ecosistemas dentro de un modelo económico caracterizado por la "destrucción y saqueo" de los recursos naturales.

6.7.3.1.2.3. “Si bien es cierto que la remediación es y deberá ser siempre una parte importante de la gestión ambiental, la actitud preventiva y las formas de aprovechamiento con menor impacto ambiental deben ir tomando cada vez un papel más importante en la planificación y la gestión ambiental.

6.7.3.1.2.4. “Se impone pues la necesidad de contar con unas formas de planificación prospectiva que permitan el manejo controlado e inteligente de un medio ambiente rico pero no inagotable y que hagan compatibles las necesidades del desarrollo y la búsqueda legítima de una mejor calidad de vida, con los requerimientos de la conservación de la capacidad de los sistemas de soporte vital, y que por lo tanto sean sostenibles.

6.7.3.1.2.5. “Así pues después de los planteamientos y opiniones anteriores, se puede proponer una definición de trabajo de la sostenibilidad basada en las siguientes características:

- “Debe incluir la consideración de variables sociales, ecológicas y económicas de manera simultánea e interactiva.
- “Debe incluir la equidad al igual que el respeto a los derechos humanos y actividades que contribuyan al bienestar humano y social.
- “Debe estar basada en acuerdos y compromisos entre los diversos agentes de las fuerzas que impactan el medio ambiente y los recursos naturales.
- “Debe incluir metas progresivas en el tiempo para ir mejorando la calidad del sistema.
- “Debe incorporar mediciones de un número limitado de indicadores basados en procedimientos estandarizados.
- “Debe propiciar la anticipación y el enfoque prospectivo para prevenir y evitar impactos ambientales indeseables.
- “Debe propiciar un cambio en la relación hombre - naturaleza, para hacerla más armoniosa que la existente.
- “Debe apoyarse en tecnologías y procesos que reduzcan el consumo de recursos naturales y minimicen la producción de residuos.

- “Debe incluir instrumentos y herramientas de distintas clases que reconozcan la complejidad del concepto.
- “Debe ser compatible con la situación humana, con el entorno y con la actividad socioeconómica.
- “Debe apoyarse en una amplia participación y una comunicación abierta y democrática.
- Debe abarcar "escalas temporales tanto humanas como ecosistémicas, y considerar "no solamente impactos ambientales locales sino también a larga distancia sobre los ecosistemas y sobre la gente".

*“Fuente: Ampliado con base en Hodge y Hardí (1997)*

#### 6.7.3.1.3. “EL ESCENARIO PROSPECTIVO

6.7.3.1.3.1. “Se considera de la mayor importancia adoptar el enfoque prospectivo para planear el saneamiento del Río Bogotá y por ello se avanzará en dar algunos lineamientos sobre la manera como se debe abordar el problema, **de manera que se busque una solución integral y sostenible**, mediante la identificación y el manejo de las diversas variables que lo definen en magnitud y calidad para superar la etapa de las soluciones reactivas, limitadas (**únicamente tecnológicas**) e insostenibles (la negrilla es de la Sala).

6.7.3.1.3.2. “Hemos dicho anteriormente que la búsqueda de **la sostenibilidad es un proceso de mejoramiento continuo que debe incluir la participación como un elemento fundamental, para llegar a acuerdos y compromisos entre los diversos actores**, que involucren sus

visiones, intereses y posibilidades para ir avanzando en el logro de metas comunes mediante el uso de las herramientas de la gestión ambiental (la negrilla es de la Sala).

#### 6.7.3.4. “LA SOSTENIBILIDAD EN EL CASO DE LAS AGUAS RESIDUALES

6.7.3.4.1. “Si se aplican los conceptos, definiciones y principios expuestos al caso específico del manejo y tratamiento de las aguas se pueden plantear dos casos de acuerdo con la magnitud de la carga contaminante.

6.7.3.4.2. “El primero cuando el curso de agua que recibe los vertimientos tiene una capacidad de dilución y autopurificación mayor a la que exige la carga contaminante, como puede ser el caso de los vertimientos de una pequeña población a un río de gran caudal.

6.7.3.4.3. “En este caso el problema es menor y la búsqueda de una solución sostenible es sencilla y clara.

6.7.3.4.4. “El segundo caso, que es el del RB, se presenta cuando las cargas contaminantes que recibe el río son muy grandes y mayores que la capacidad de dilución y autodepuración del cuerpo receptor. En este caso una solución de tipo reactivo solo tendrá un carácter parcial y temporal. Pero si se quiere ir avanzando hacia la sostenibilidad, es necesario manejar y conocer las diversas variables que definen la magnitud y el tipo de carga contaminante.

6.7.3.4.5. “Por lo tanto **la solución al caso del Río Bogotá, corresponde a un proyecto integral y multifacético de gestión ambiental**, en el que se utilicen de manera combinada las diversas

herramientas e instrumentos disponibles para avanzar en busca de la sostenibilidad (la negrilla es de la Sala).

6.7.3.4.6. “Estas herramientas e instrumentos pueden ser, normativos, tecnológicos, de planificación, económicos y educativos. Mediante su utilización concertada y selectiva **se puede ir avanzando tanto en la remediación de una gravísima situación ambiental como en la prevención de que siga acentuándose** (la negrilla es de la Sala).

6.7.3.4.7. “Lo anterior implica que la búsqueda de **la sostenibilidad en el caso de las aguas residuales debe partir de unas definiciones sobre metas ambientales de calidad de agua del río, que sean social y económicamente aceptables para poder utilizarlo para ciertos usos que se pueden ir ampliando y haciendo más exigentes con el paso del tiempo** (la negrilla es de la Sala).

6.7.3.4.8. “Este enfoque del problema implica el uso de la prospectiva para generar escenarios deseables realistas y más probables que permitan ir controlando la magnitud y el tipo de cargas contaminantes que recibe el río.

6.7.3.4.9. “En cuanto a la magnitud de los caudales por tratar se puede expresar de la siguiente manera:

$$“C_t = C_D + C_{LL} + C_O + C_i$$

“Donde,

“ $C_t$  = Caudal por tratar.

“ $C_D$  = Magnitud de los vertimientos de origen doméstico.

“ $C_{LL}$  = Magnitud de las aguas lluvias que ingresan al sistema de conducción hasta las PTAR.

“ $C_o$  = Magnitud de los vertimientos generados por las diversas actividades socioeconómicas, como la industria, los servicios, etc.

“ $C_i$ = Magnitud de la infiltración al sistema de alimentación de las PTAR, alcantarillado.

6.7.3.4.10. “Se ha considerado tradicionalmente que la producción de aguas residuales domésticas, es incontrolable al igual que el crecimiento poblacional de la ciudad, por lo cual la actitud frente a los problemas de saneamiento y tratamiento de aguas residuales urbanas ha sido completamente reactiva.

6.7.3.4.11. “Pero aún la variable tan autónoma como esta ofrece unas ciertas posibilidades de manejo, como se ha demostrado en distintas ciudades del mundo. Por ejemplo el índice de consumo per cápita que se encuentra en varias de ellas, indica que es posible reducirlo hasta niveles que respeten una adecuada calidad de vida pero que eviten el consumo excesivo e innecesario. Debe anotarse que las estrategia de ahorro de agua reduce el caudal por tratar pero no la carga contaminante que sigue siendo la misma. Pero el caudal de diseño del sistema de conducción y tratamiento, sí se reduce al igual que las inversiones necesarias para tratarlo.

6.7.3.4.11.1. “El consumo per cápita del mundo varía de acuerdo con varios factores como la ubicación geográfica con sus condiciones climáticas, el tipo de actividad ligado al nivel de desarrollo de cada país y la diversidad de culturas y costumbres.

6.7.3.4.11.2. “En la **Tabla 1** se presenta el consumo anual y diario en litros por persona en diferentes países y ciudades del mundo donde se puede ver la diversidad de valores de consumo. Es claro que los países más desarrollados como Estados Unidos, Japón o Suiza son los mayores consumidores de agua con un valor que supera los 250 litros de agua

demandados por un habitante en un día mientras que en países en vía de desarrollo como Colombia se consume aproximadamente la mitad de este valor y en otros está muy por debajo de éste.

6.7.3.4.11.2.1. “EMPRESA DE ACUEDUCTO ALCANTARILLADO  
DE BOGOTÁ USOS Y ESTÁNDARES DE CALIDAD DEL RÍO  
BOGOTÁ Agosto 2002

Tabla 1

“Consumo anual y diario en litros por persona en diferentes países y ciudades del mundo

| “PAIS              | LITROS/HABITANTE AÑO | LITROS/HABITANTE DIA: M3/VIVIENDA |      |
|--------------------|----------------------|-----------------------------------|------|
| MES                |                      |                                   |      |
| “Estados Unidos    | 110.000              | 301                               |      |
| “Japón             | 104.000              | 285                               |      |
| “Suiza             | 96.000               | 263                               | ---  |
| “Canadá            | 93.000               | 255                               |      |
| “Italia            | 78.000               | 214                               |      |
| “Comunidad Europea | 55.000               | 151                               |      |
| “España            | 54000                | 147                               |      |
| “Colombia*         | 41000 - 56000        | 114-161                           |      |
| “Grecia            | 40.000               | 110                               | ---  |
| “Argelia           | 35.000               | 96                                |      |
| “India             | 9.000                | 25                                | ---  |
| “Sudán             | 7.000                | 19                                | ---- |

| PAIS            | LITROS/HABIT AÑO | LITRS/HABIT DIA |
|-----------------|------------------|-----------------|
| M3/VIVIENDA MES |                  |                 |

|                               |       |      |      |
|-------------------------------|-------|------|------|
| Bogotá*                       | 46000 | 126  | 23   |
| SantaCruz (Bolivia)**         | ----  | ---- | 18   |
| Estambui (Turquía)**          |       | ---- | 17.8 |
| París (Francia)'              | ----  | ---- | 21.4 |
| Ciudad dej Cabo<br>(S.Africa) | ----  | ---- | 21   |
| Ámsterdam<br>(Holanda)**      |       |      | 18.4 |

Fuente:: [www. Cepis. Org](http://www.Cepis.Org). Agua

“Fuente: [www.cra.gov.co](http://www.cra.gov.co) Indicadores de ESP en Colombia  
dato de 1997

“Fuente: Revista Regulación de Agua Potable y Saneamiento (CRA)  
No7 Junio 2001.

6.7.3.4.11.2.1.1. “En la Tabla 2 se presentan los consumos per cápita en ciudades colombianas donde se aprecia que el consumo de Bogotá es de los mas bajos (126 lt/hab/día), debido a sus condiciones climáticas. Las ciudades de climas cálidos tienen un consumo promedio de 180 lt/hab/día.

6.7.3.5. “Consideraciones de calidad

6.7.3.5.1. “Para efectos de aproximarse al uso sostenible del recurso hídrico es necesario, como se señaló anteriormente, considerar la calidad con que cuenta además de la cantidad bruta de agua existente y su relación con la demanda antrópica.

6.7.3.5.2. “Los balances hídricos que tienen en cuenta exclusivamente metodologías y consideraciones de carácter cuantitativo conducen a conclusiones equivocadas. Así por ejemplo, en el caso del RB, pueden

encontrarse sectores de la cuenca que presentan un balance positivo desde el punto de vista de la cantidad de agua como en el caso del sector de su Cuenca Baja, pero que en la práctica son completamente deficitarios si se tiene en cuenta que su alto grado de contaminación no permite que el agua pueda utilizarse para propósitos que requieran de unos ciertos mínimos de calidad.

6.7.3.5.3. “El uso del agua del RB para consumo humano implica tratamientos tan complejos y costosos que los municipios de la cuenca prefieren buscar otras fuentes de captación para sus sistemas de acueducto. Por esta razón la EAAB está suministrando agua potable a varios municipios que podrían abastecerse del RB si su calidad lo permitiera. Con usos menos exigentes en términos de calidad ocurre algo semejante. **Lo anterior pone de presente claramente la imposibilidad del reuso del agua debido a su alta contaminación y por lo tanto que la carencia de sistemas de tratamiento de las aguas residuales sea un obstáculo fundamental para el uso sostenible del recurso** (la negrilla es de la Sala).

6.7.3.5.4. “La pésima calidad del agua del RB tiene otros efectos menos directos, como por ejemplo la presión sobre el agua subterránea que se ha convertido en una fuente, cada vez más importante, mediante aprovechamientos tanto legales como ilegales, que han conducido a una rápida y excesiva profundización del nivel freático.

6.7.3.5.5. “Los usos de calidad que se definan deben también ser compatibles con la definición de sostenibilidad que se adopte y con las metas temporales que se establezcan para ir avanzando en su búsqueda. Se plantea pues el uso sostenible del agua como un proceso de mejoramiento continuo que debe partir de unas metas realistas y factibles que deben irse haciendo más estrictas con el paso del tiempo.

6.7.3.5.6. **“La calidad del agua residual es un concepto relativo ya que depende de la definición de los usos futuros que tendría después de ser tratada.** Es decir que el nivel de tratamiento requerido y por lo tanto sus costos dependen de lo que se quiera hacer con el recurso hídrico y de las condiciones socioeconómicas de la región, para que los estándares de calidad sean compatibles con ellos y por lo tanto logrables.

6.7.3.5.7. “Los estándares de calidad que se definan deben también ser compatibles con la definición de sostenibilidad que se adopte y con las metas temporales que se establezcan para ir avanzando en su búsqueda. Se plantea pues el uso sostenible del agua como un proceso de mejoramiento continuo que debe partir de unas metas realistas y factibles que deben irse haciendo más estrictas con el paso del tiempo.

#### 6.7.3.6. USOS Y ESTÁNDARES DE CALIDAD DE AGUA DE LA CUENCA DEL RB

6.7.3.6.1. “La reutilización de las aguas es una herramienta eficiente para apoyar su aprovechamiento sostenible. Sin embargo, la actitud tradicional ha sido la de usar el agua una sola vez, volviéndola a utilizar sólo marginalmente y sin tener en cuenta su calidad.

6.7.3.6.1.1. “Por otra parte la fijación de estándares ambientales y límites permisibles de contaminantes se ha hecho fundamentalmente desde la perspectiva de la salud y tomando en consideración condiciones y valores que no son apropiadas para la situación socioeconómica y ambiental de la región del RB.

6.7.3.6.1.2. “Actualmente el uso del agua en las actividades de la cuenca de RB se hace sin importar si cumple o no con los parámetros de calidad mínimos que son los que se refieren a la salud. Es necesario crear conciencia de las implicaciones que puede tener el uso inadecuado de

aguas contaminadas para evitar impactos críticos tanto en la salud del hombre como en los recursos naturales.

6.7.3.1.3. “Así mismo, es importante conocer qué zonas del RB, en relación con su uso actual, no representan riesgos de salud pública y ambientales y determinar cuáles, a través del sistema de saneamiento adoptado, tienen la posibilidad de ser usadas en las actividades, en la medida que las condiciones lo permitan, sean las que la comunidad quiere y está acostumbrada a realizar. Esto permite que la comunidad desarrolle un concepto sostenible en el que se da más de un uso al agua, sin poner en riesgo alguno la salud de la población y los recursos naturales.

6.7.3.6.1.4. “Se considera que la definición de estándares y límites para la calidad del agua debe articularse con la visión de sostenibilidad de manera que se fijen estos valores de acuerdo con las condiciones propias del territorio y de sus habitantes, buscando que sean realistas y cumplibles y que estén relacionadas con los usos actuales y potenciales del suelo y de las actividades socioeconómicas en la cuenca del RB.

6.7.3.6.1.1. “MARCO CONCEPTUAL

6.7.3.6.1.1.1. “El agua residual puede ser utilizada nuevamente en diferentes actividades aumentando así la oferta del recurso, disminuyendo la presión sobre él y por tanto apoyando su empleo sostenible.

6.7.3.6.1.1.1.1. El tratamiento y el reuso del agua juegan un papel fundamental en su administración y manejo, que es cada vez más costoso y limitado en todos los países, especialmente en aquellos que presentan problemas de escasez.

6.7.3.6.1.1.1.2. “En los países industrializados, se han desarrollado muchos proyectos e investigaciones para el reuso del agua, obteniendo muy buenos resultados que han traído consigo, beneficios ambientales, prevención de riesgos a la salud y beneficios económicos.

6.7.3.6.1.1.1.3. “En los países en desarrollo, como es el caso de Colombia y mas exactamente en el RB y en la ciudad de Bogotá, también es deseable dar estos usos al agua, sólo que se deben usar tecnologías adecuadas a su realidad económica y social.

6.7.3.6.1.1.1.4. “Como se mencionó anteriormente la calidad del agua residual es un concepto relativo, ya que depende de la definición sobre los usos futuros del agua tratada, puesto que puede ir a las fuentes superficiales y finalmente al mar o a las fuentes superficiales y ser utilizada por otras poblaciones aguas abajo, o ser reutilizada para diversos usos como los agrícolas, los urbanos, los recreativos, los industriales o la **recarga de acuíferos entre los mas importantes y desarrollados.**

6.7.3.6.1.1.1.5. “Existen varios tipos de usos, entre los cuales los principales son el agrícola, el urbano, el industrial y por último el recreativo, que han sido aplicados y desarrollados en otros lugares con muy buenos resultados, lo que ha originado un conjunto de estándares de calidad para los diversos usos. El ideal es tener estándares que tomen la experiencia de otros países, pero que tengan en cuenta la realidad nacional y más exactamente la del RB.

6.7.3.6.1.1.1.6. “El uso agrícola del agua, representa una fracción importante del total de la demanda y su calidad mínima requerida, varia de acuerdo al producto que se quiera regar. Los usos agrícolas del agua pueden ser restringidos, si el producto que es regado no es de consumo humano (ej: flores) o si antes de ser consumido -nasa por un proceso

productivo o de cocción (ej: papa), y no restringidos, si el productos es consumido directamente (ej: hortalizas) y no restringidos. Los parámetros relevantes del agua residual tratada, si ésta se utiliza en agricultura son: salinidad, sodio, cloros residuales y nutrientes. Los nutrientes más importantes para los cultivos son el nitrógeno, fósforo, potasio, zinc, boro y sulfato, que generalmente, en el agua tratada, se presentan en suficientes concentraciones supliendo una gran parte de las necesidades de abonos.

6.7.3.6.1.1.1.7. “Para el uso urbano de agua tratada, las consideraciones más importantes son la seguridad del servicio y la protección a la salud pública. Los requerimientos en tanto a la calidad del agua, varían según el contacto de las personas con el lugar uso. Es así como, donde no hay o está prohibido el acceso de personas, responde a un uso restringido y donde las personas tienen acceso, responde a un uso sin restricción. Un uso restringido requiere de parámetros de calidad inferiores a los de un uso sin restricción.

6.7.3.6.1.1.1.8. “Otro posible propósito del agua tratada es el reuso industrial, que representa un mercado potencial significativo en muchas ciudades en desarrollo, pues es ideal para industrias ya que hay una optimización de los procesos y se disminuye el costo por unidad de producción. El reuso del agua dentro de una planta industrial es generalmente una parte integral del proceso y debe ser desarrollado específicamente para cada caso.

6.7.3.6.1.1.1.9. “Finalmente existe el reuso del agua en actividades recreativas, para el cual el agua deberá ser estéticamente agradable, sin olores molestos, virtualmente libre de sustancias como aceite, grasas, materia flotante y libre de crecimiento acuático que pudieran provocar dificultades para su uso. Deberá considerarse libre de patógenos y

sustancias tóxicas que pudieran causar irritación de ojos o de la piel. Entre estos usos se encuentra el canotaje y la natación”.

#### 6.7.3.6.1.2. “ENFOQUE METODOLÓGICO

6.7.3.6.1.2.1. “Como se ha dicho reiteradamente, la estrategia más realista y factible en el caso del RB, consiste en establecer criterios de calidad del agua que vayan haciéndose paulatinamente más estrictos hasta alcanzar en un determinado período de tiempo, metas ambientales que deben coincidir con los estándares que se fijan como deseables y posibles para el futuro.

6.7.3.6.1.2.2. “Se considera pues, que la definición de estándares y límites para la calidad del agua debe articularse con la visión de sostenibilidad que se haya adoptado, de manera que se fijan estos valores de acuerdo con las condiciones propias del territorio y de sus habitantes. Los límites inferior y superior de esta ‘banda de expectativas razonables’ no son fáciles de definir, ya que deben representar acuerdos consensuales entre los diversos actores relacionados con el uso y el manejo del río.

6.7.3.6.1.2.3. “El **Gráfico 3** presenta esquemáticamente la secuencia descrita para la definición de usos, estándares de calidad y componentes de saneamiento, con el fin de seguir en un proceso ordenado y lógico que conlleve al correcto ordenamiento de ideas y de prioridades de inversión para el saneamiento del RB (ver fl. 28).

##### 6.7.3.6.1.2.3.1. **Relación entre usos y estándares de calidad.**

6.7.3.6.1.2.3.1.1. “La calidad de un río receptor de las aguas residuales producidas por las actividades socioeconómicas de su cuenca, depende

directamente de dos factores: La calidad de agua que se vierte en él y la capacidad de autodepuración del río.

6.7.3.6.1.2.3.1.2. “Estos dos factores son determinantes para la definición del sistema de saneamiento que se debe aplicar, pero la incertidumbre nace cuando pensamos en, ¿Cuál es la calidad aceptable del agua del río?

6.7.3.6.1.2.3.1.2.1. “La respuesta a la pregunta anterior, es que la calidad aceptable para el río, es aquella que permite **usar su agua en las actividades del desarrollo de la cuenca**, cumpliendo con los criterios de calidad que para ello se definan. Por lo tanto se deben conocer cuáles son las actividades del desarrollo de la cuenca y pensar en cómo se comportan en un horizonte de tiempo determinado que en este caso se fijó en 10 años.

6.7.3.6.1.2.3.1.2.2. “Si se expresa de otra manera la idea anterior, se debe decir que la calidad del agua, expresada mediante estándares, está determinada por el tipo de uso o actividad en la que se quiera aprovechar el recurso, optimizándolo y haciendo sostenible el desarrollo de la cuenca del Río.

6.7.3.6.1.2.3.1 “El mejoramiento de la calidad del agua de una cuenca hidrográfica refleja inmediatamente la posibilidad de aumentar el número de usos, pues se pueden realizar actividades adicionales que demandan mayor calidad del recurso.

6.7.3.6.1.2.3.1.4. “El agua usada en una actividad no proviene estrictamente del caudal del río, ya que también puede ser tomada de un vertimiento antes de llegar a su punto de descarga, aplicándose igualmente la relación entre mejoramiento de la calidad con el aumento del número de usos, como se puede ver en el **Gráfico 4** (ver fl. 30, c. Usos y Estándares, anexo por la EAAB).

6.7.3.6.1.2.3.1.5. “El mejoramiento de la calidad del agua del río va a depender del nivel y de la **eficiencia del sistema de saneamiento** que se adopte, lo cual será un parámetro del incremento de usos posibles en el horizonte de tiempo planteado.

6.7.3.6.1.2.3.1.6. “Otro factor que puede afectar el mejoramiento de la calidad de la fuente hídrica en el tiempo, es una **alteración no esperada** en el desarrollo socioeconómico de la cuenca.

6.7.3.6.1.2.3.1.7. “Para proporcionar seguridad al medio ambiente y hacer un correcto uso del agua, es necesario determinar ciertos criterios de calidad que sean técnica y económicamente realistas y considerarlos como metas de cumplimiento a corto y mediano plazo, que deben irse haciendo más estrictos, hasta garantizar los usos que se derivan del escenario mas probable. Los estándares más exigentes, se pueden entender como las metas de cumplimiento a largo plazo como se puede ver en el **Gráfico 5** (ver folio 31).

6.7.3.6.1.2.3.1.8. “La velocidad de mejoramiento de la calidad del agua puede ser variable. En el caso del RB, en los primeros años sería muy baja debido a la existencia de la demanda béntica, la cual por cálculos hechos en el modelo QUAL 2K sería/ eliminada en un período aproximado de 8 a 10 años, esto sin tomar la opción de un dragado. Pero una vez se supere esta etapa en la que los cambios no son muy notables la tasa de mejoramiento de la calidad se incrementa considerablemente presentando resultados significativos de la calidad del agua del RB hasta un punto en el cual vuelve a disminuir, pues a partir de ese punto el mejoramiento de un parámetro de calidad es cada vez mas difícil. El **Gráfico 5** presenta esquemáticamente esta evolución.

6.7.3.6.1.2.3.9. *“Metas ambientales a corto, mediano y largo plazo relacionadas con el mejoramiento de la calidad*

6.7.3.6.1.2.3.9.1. “Los estándares de la calidad de las aguas residuales que se vierten en la fuente hídrica y las de la propia fuente, deben además de variar tanto en el tiempo como a lo largo de su curso, pues la calidad del río puede ser diferente. En el río Bogotá la calidad del agua varía en sus diferentes sectores debido a su heterogeneidad física y a la diversidad de actividades económicas.

6.7.3.6.1.2.9.2. “Para determinar los usos deseables del RB, es necesario conocer las actividades que se desarrollan actualmente en su cuenca y su forma de ejecución, así como las que potencialmente se quieran y puedan desarrollar (escenario más probable), para que de acuerdo con una información base de parámetros de claridad y el modelo QAL”K se puedan definir cuáles son los usos posibles en el horizonte de tiempo en consideración.

**6.7.3.6.1.2.9.2.1. “Importancia De Los Parámetros Del Agua Residual Según Su Uso**

6.7.3.6.1.2.9.2.1.1. “Como se mencionó anteriormente, la calidad deL agua de un río depende del uso que se le quiera dar y ésta a su vez, está determinada por los diferentes parámetros que caracterizan las aguas, los cuales varían en importancia dependiendo el tipo de uso. Así por ejemplo, los problemas y por tanto los estándares, en el uso para riego agrícola, están relacionados principalmente con la salinidad, los metales pesados, los nutrientes, los sólidos suspendidos y los patógenos.

6.7.3.6.1.2.9.2.1.2. “Un agua para riego con alto contenido de sales disueltas, asociada con altas temperaturas y con las características físicas del suelo, puede traer como consecuencia su rápida evado-transpiración

y la deposición y acumulación de las sales en el suelo, afectando sus propiedades físicas y mecánicas como permeabilidad y estructura.

6.7.3.6.1.2.9.2.1.3. “Los nutrientes presentes en las aguas residuales, sirven como fertilizantes para la agricultura, sin embargo, en los casos en que su contenido excede la demanda de las plantas, pueden provocar problemas como la eutroficación de cuerpos de agua. Los nutrientes de importancia en la gestión agrícola son el nitrógeno, el fósforo y, en algunas ocasiones, el potasio, el zinc, el boro y el azufre, siendo el nitrógeno el nutriente que reporta mayores beneficios y que suele presentarse en exceso con mayor frecuencia en las aguas residuales municipales.

6.7.3.6.1.2.9.2.1.4. “El nitrógeno presente en el agua residual puede sustituir una cantidad equivalente de fertilizante comercial durante el comienzo y la mitad del período de crecimiento de las plantas, pero su exceso en la última parte del periodo de crecimiento, puede resultar negativo para muchos cultivos, al provocar un excesivo crecimiento vegetativo, madurez retrasada o no uniforme, o un descenso de la calidad del cultivo.

6.7.3.6.1.2.9.2.1.5. “Se han observado problemas relacionados con la obturación de los sistemas de aspersión y riego de goteo especialmente debido al desarrollo de películas biológicas en la cabeza de los aspersores, en los orificios de emisión o en las conducciones de suministro, así como concentraciones de algas y sólidos suspendidos, que provocan obturaciones.

6.7.3.6.1.2.9.2.1.6. Finalmente, los riesgos sanitarios están representados por la presencia de agentes biológicos como bacterias patógenas, helmintos, protozoos y virus. Ejemplos como el anterior se presentan también en los usos urbano, recreativo e industrial, siendo este

último en el que se presenta mayor variabilidad debido a la diversidad de productos y procesos industriales.

6.7.3.6.1.2.9.2.1.7. “Es muy importante saber cuáles son los compuestos químicos orgánicos e inorgánicos más importantes en un determinado tipo de uso, para optimizar los recursos del proyecto de reuso que se quiere ejecutar.

6.7.3.6.1.2.9.2.1.8. “Por las razones anteriormente mencionadas se elaboró la **Tabla 5**, donde se presenta la importancia, para los parámetros más representativos en aguas residuales, las consecuencias que puede traer su concentración. La fuente de donde provienen principalmente y la importancia que tienen cuando se está pensando en hacer un uso determinado del agua que los contiene.

“**TABLA 5**

“Parámetros de calidad del agua y su importancia en diferentes usos

| SÓLIDOS SUSPENDIDOS.                                                                                                                                                    |                                                                                               |                            |                                                                                                                                                                                                                                               |
|-------------------------------------------------------------------------------------------------------------------------------------------------------------------------|-----------------------------------------------------------------------------------------------|----------------------------|-----------------------------------------------------------------------------------------------------------------------------------------------------------------------------------------------------------------------------------------------|
| Parámetros : SST (Sólidos Suspendidos Totales), SSV ( Sólidos Suspendidos Volátiles), SSF (Sólidos Suspendidos Filtrados)                                               |                                                                                               |                            |                                                                                                                                                                                                                                               |
| MOTIVO DE SU IMPORTANCIA.                                                                                                                                               | CONSECUENCIAS.                                                                                | FUENTE                     | IMPORTANCIA PARA EL REUSO                                                                                                                                                                                                                     |
| Los sólidos suspendidos pueden llevar al desarrollo de los depósitos de lodos y condiciones anaerobias, cuando los residuos no tratados son lanzados al medio acuático. | Problemas estéticos, depósitos de lodo, absorción de contaminantes y protección de patógenos. | Domésticos e industriales. | Los contaminantes orgánicos, metales pesados se absorben sobre las partículas. La materia suspendida protege a los microorganismos de los agentes desinfectantes. Cantidades excesivas de SS taponan los sistemas los sistemas de irrigación. |
| MATERIA ORGÁNICA BIODEGRADABLE                                                                                                                                          |                                                                                               |                            |                                                                                                                                                                                                                                               |

|                                                                                                                                                                                                                                                  |                                                                                                                                                                                      |                            |                                                                                                                                                                                                                                                                                                                                                                                                        |
|--------------------------------------------------------------------------------------------------------------------------------------------------------------------------------------------------------------------------------------------------|--------------------------------------------------------------------------------------------------------------------------------------------------------------------------------------|----------------------------|--------------------------------------------------------------------------------------------------------------------------------------------------------------------------------------------------------------------------------------------------------------------------------------------------------------------------------------------------------------------------------------------------------|
|                                                                                                                                                                                                                                                  |                                                                                                                                                                                      |                            |                                                                                                                                                                                                                                                                                                                                                                                                        |
| Parámetros : DBO (Demanda Bioquímica de Oxígeno), DQO (Demanda Química de Oxígeno))                                                                                                                                                              |                                                                                                                                                                                      |                            |                                                                                                                                                                                                                                                                                                                                                                                                        |
| MOTIVO DE SU IMPORTANCIA.                                                                                                                                                                                                                        | CONSECUENCIAS.                                                                                                                                                                       | FUENTE                     | IMPORTANCIA PARA EL REUSO                                                                                                                                                                                                                                                                                                                                                                              |
| Compuesta principalmente por proteínas carbohidratos y grasas. Si es descargada sin tratamiento al medio ambiente su estabilización biológica puede llevar al consumo de oxígeno natural y al desarrollo de condiciones sépticas.                | Consumo de oxígeno, Mortalidad de peces, Condiciones sépticas.                                                                                                                       | Domésticos e industriales. | Problemas estéticos y negativos. La materia orgánica es alimento para los microorganismos, afecta negativamente los procesos de desinfección, hace al agua inadecuada para algunos usos industriales y otro tipo de usos. Consume oxígeno y puede causar efectos crónicos y agudos si el agua reciclada de usa para fines potables.                                                                    |
|                                                                                                                                                                                                                                                  |                                                                                                                                                                                      |                            |                                                                                                                                                                                                                                                                                                                                                                                                        |
| NUTRIENTES                                                                                                                                                                                                                                       |                                                                                                                                                                                      |                            |                                                                                                                                                                                                                                                                                                                                                                                                        |
| Parámetros : Nitrógeno, Fósforo, Potasio, Zinc, Boro y Azufre                                                                                                                                                                                    |                                                                                                                                                                                      |                            |                                                                                                                                                                                                                                                                                                                                                                                                        |
| MOTIVO DE SU IMPORTANCIA.                                                                                                                                                                                                                        | CONSECUENCIAS.                                                                                                                                                                       | FUENTE                     | IMPORTANCIA PARA EL REUSO                                                                                                                                                                                                                                                                                                                                                                              |
| Son nutrientes esenciales para el crecimiento, cuando son lanzados al medio acuático, pueden llevar al crecimiento de vida acuática indeseable. Cuando son lanzados en cantidades excesivas en el suelo, pueden contaminar el agua subterránea.. | Crecimiento excesivo de algas (etrofización del cuerpo receptor). Toxicidad para los peces (amonio). Enfermedades en recién nacidos (nitratos) y Contaminación del agua subterránea. | Domésticos e industriales. | Estos elementos son nutrientes esenciales para el crecimiento de las plantas y su presencia revalora el agua para su irrigación. Cuando el agua con que contiene estos nutrientes se descarga a cuerpos receptores favorece el crecimiento indeseable de vida acuática. Cuando se aplica en exceso al suelo, el nitrógeno puede generar concentraciones elevadas como nitratos en el agua subterránea. |

|                                                                          |                                            |                           |                                 |
|--------------------------------------------------------------------------|--------------------------------------------|---------------------------|---------------------------------|
| ORGÁNICOS TÓXICOS (MATERIA ORGÁNICA REFRACTARIA)                         |                                            |                           |                                 |
| Parámetros : Compuestos específicos (pesticidas, hidrocarburos clorados) |                                            |                           |                                 |
| MOTIVO DE SU IMPORTANCIA.                                                | CONSECUENCIAS.                             | FUENTE                    | IMPORTANCIA PARA EL REUSO       |
| Esta materia tiende a resistir los métodos                               | Toxicidad, Espumas (detergentes) Reducción | Industriales y Agrícolas. | Muchos de estos componentes son |

|                                       |                                                                                    |                            |                                                                                                                                                                                                                                                          |
|---------------------------------------|------------------------------------------------------------------------------------|----------------------------|----------------------------------------------------------------------------------------------------------------------------------------------------------------------------------------------------------------------------------------------------------|
| tradicionales de tratamiento.         | de la transferencia de oxígeno (detergentes), No biodegradabilidad y Malos olores. |                            | recalcitrantes o difícilmente biodegradables y tóxicos al ambiente y su presencia en aguas tratadas puede limitar el uso de éstas en riego u otros usos..                                                                                                |
| CONCENTRACIONES DE IONES DE HIDROGENO |                                                                                    |                            |                                                                                                                                                                                                                                                          |
| Parámetros : Ph                       |                                                                                    |                            |                                                                                                                                                                                                                                                          |
| MOTIVO DE SU IMPORTANCIA.             | CONSECUENCIAS.                                                                     | FUENTE                     | IMPORTANCIA PARA EL REUSO                                                                                                                                                                                                                                |
|                                       |                                                                                    | Domésticos e industriales. | El Ph del agua afecta los procesos de desinfección, coagulación, solubilidad de los metales y la alcalinidad de los suelos. El Ph usual de las aguas residuales está entre 6, 5 y 8.5, en aguas industriales estos valores pueden cambiar drásticamente. |

|                                                                                                                                               |                                                                                                                                                                   |               |                                                                                        |
|-----------------------------------------------------------------------------------------------------------------------------------------------|-------------------------------------------------------------------------------------------------------------------------------------------------------------------|---------------|----------------------------------------------------------------------------------------|
| METALES PESADOS                                                                                                                               |                                                                                                                                                                   |               |                                                                                        |
| Parámetros : Elementos específicos (Cd, Zn, Ni, Cu, Cr, Pb y Hg)                                                                              |                                                                                                                                                                   |               |                                                                                        |
| MOTIVO DE SU IMPORTANCIA.                                                                                                                     | CONSECUENCIAS.                                                                                                                                                    | FUENTE        | IMPORTANCIA PARA EL REUSO                                                              |
| Los metales pesados son adicionados por las actividades industriales y comerciales, debiendo ser removidos si se va a usar el agua residual.. | Toxicidad, Inhibición al tratamiento biológico de aguas residuales, Problemas con la disposición del lodo en la agricultura y Contaminación del agua subterránea. | Industriales. | Algunos metales pesados se acumulan en el ambiente y son tóxicos a plantas y animales. |

|                                                                                                            |                |        |                     |
|------------------------------------------------------------------------------------------------------------|----------------|--------|---------------------|
| INORGANICOS DISUELTOS                                                                                      |                |        |                     |
| Parámetros : Sólidos disueltos totales, conductividad eléctrica, elementos específicos (Na, Ca, Mg, Cl, B) |                |        |                     |
| MOTIVO DE SU                                                                                               | CONSECUENCIAS. | FUENTE | IMPORTANCIA PARA EL |

| IMPORTANCIA.                                                                                                                               |                                                                                                                                                          |               | REUSO                                                                                                                                                                                            |
|--------------------------------------------------------------------------------------------------------------------------------------------|----------------------------------------------------------------------------------------------------------------------------------------------------------|---------------|--------------------------------------------------------------------------------------------------------------------------------------------------------------------------------------------------|
| Son adicionados por los sistemas domésticos de abastecimiento de agua, debiendo ser removidos si se va a usar nuevamente el agua residual. | Salinidad excesiva: perjuicio a las plantaciones (irrigación), Toxicidad para las plantas (algunos iones) y Problemas de permeabilidad del suelo (sodio) | Reutilizados. | La salinidad excesiva puede dañar a las cosechas, lones específicos como el sodio, los cloruros y el boro son tóxicos a algunas cosechas. El sodio puede afectar la permeabilidad de los suelos. |

| CLORO RESIDUAL                       |                |        |                                                                                                                                                                                                                           |
|--------------------------------------|----------------|--------|---------------------------------------------------------------------------------------------------------------------------------------------------------------------------------------------------------------------------|
| Parámetros : Cloro Libre o Combinado |                |        |                                                                                                                                                                                                                           |
| MOTIVO DE SU IMPORTANCIA.            | CONSECUENCIAS. | FUENTE | IMPORTANCIA PARA EL REUSO                                                                                                                                                                                                 |
|                                      |                | .      | Concentraciones excesivas de cloro libre disponible (>0.05 mg/L pueden afectar las hojas dañar ciertos cultivos. La mayoría del cloro en las aguas residuales se encuentra en forma combinada que no daña a los cultivos. |

6.7.3.6.2. TIPOS DE USOS DEL AGUA

6.7.3.6.2.1. “De acuerdo con la experiencia mundial el agua residual tiene una gran variedad de campos de aplicación, los cuales se dividen en cuatro clases: agrícola, urbana, industrial y recreativa, siendo la recreativa la que guarda menos relación con la actividad socioeconómica actual de la cuenca del RB y los usos del agua del Río, con excepción de la actividad recreativa del sector de Suesca donde se practica el canotaje.

6.7.3.6.2.2. “El análisis se centra en los usos agrícolas y urbanos debido a que la calidad actual y futura en el horizonte 2012 del agua del RB, no

permite usos como la potabilización, ya que exigirían grandes inversiones no factibles para procesos de tratamiento avanzados.

6.7.3.6.2.3. “La agricultura es la actividad más extensa de la cuenca del RB y por lo tanto es la mayor demanda potencial del recurso. Existen 2 tipos de uso, el restringido que es el que se refiere a aquellos productos agrícolas que no son comestibles como las flores en la Sabana de Bogotá, productos de la ganadería como pasturas o productos alimenticios que tienen un procesamiento comercial o que habitualmente se consumen cocidos y el uso no restringido que son aquellos cultivos de alimentos que se consumen crudos o que simplemente no tienen ningún procesamiento comercial como es el caso de las hortalizas en la cuenca del RB.

6.7.3.6.2.4. “En la **Tabla 6** se encuentran los usos posibles en el sector agrícola, divididos en tres grupos donde los 2 primeros son de tipo de uso restringido y su diferencia radica en el nivel de calidad del agua. Este tema se tratará mas adelante con la asignación de los estándares de calidad para cada tipo de uso.

6.7.3.6.2.5. “Es importante mencionar que entre los usos potenciales de riego de cultivos en la cuenca del RB están las flores, pasturas, frutales, papa y hortalizas. Algunos de ellos en este momento se aplican, pero con un bajo cumplimiento de la normatividad, poniendo en peligro la salud humana.

**6.7.3.6.2.5.1. “Tabla 6**

Tipos, aplicaciones y ejemplos de uso del agua en la agricultura

|                         |
|-------------------------|
| <b>USO AGRÍCOLA (1)</b> |
|-------------------------|

| <b>Tipo De uso no restringido:</b> Riego de cultivos no alimenticios, pastura para animales lecheros, pienso, fibra y cultivos de semilla  |                                                              |
|--------------------------------------------------------------------------------------------------------------------------------------------|--------------------------------------------------------------|
| <b>Nivel de calidad del agua residual:</b> Baja                                                                                            |                                                              |
| Aplicación                                                                                                                                 | Ejemplos                                                     |
| Riego de cultivos no destinados al consumo humano                                                                                          | Flores.                                                      |
| Riego de de cultivos que habitualmente son procesados por calor a desecación antes del consumo humano                                      | Cultivos de semilla, granos, oleaginosas, fibra y remolacha. |
| Riego de hortalizas y frutas producidas exclusivamente para envasado u otro tipo de procesamiento que destruye efectivamente los patógenos | Duraznos, melocotones, tomates, palmitos.                    |
| Riego de cultivos forrajeros u otros cultivos para la alimentación animal que son desecados al sol antes del consumo                       | Pastura para animales lecheros                               |
| Riego de parques en áreas cercadas inaccesibles para el público                                                                            | .Viveros, bosques y cinturones verde                         |

| USO AGRÍCOLA (2)                                                                                                                                 |                                                    |
|--------------------------------------------------------------------------------------------------------------------------------------------------|----------------------------------------------------|
| <b>Tipo De uso no restringido:</b> Riego de cultivos de alimentos comercialmente procesados                                                      |                                                    |
| <b>Nivel de calidad del agua residual:</b> Intermedia                                                                                            |                                                    |
| Aplicación                                                                                                                                       | Ejemplos                                           |
| Riego de cultivos forrajeros frescos para consumo                                                                                                | Pastura para alimentos lecheros                    |
| Riego de cultivos para consumo humano que no tienen contacto directo con las aguas servidas, siempre que no se comercialicen las cosechas caídas | Frutales, cultivos de estacas, tomate, pepino, etc |
| Riego de cultivos para consumo humano que habitualmente se sirven conocidos                                                                      | Papa, berenjena y remolacha                        |

| USO AGRÍCOLA (3)                                                                      |                                         |
|---------------------------------------------------------------------------------------|-----------------------------------------|
| <b>Tipo De uso no restringido:</b> Cultivos de alimentos no procesados comercialmente |                                         |
| <b>Nivel de calidad del agua residual:</b> Alta                                       |                                         |
| Aplicación                                                                            | Ejemplos                                |
| Riego de todo cultivo para consumo                                                    | Hortalizas en general, lechuga, tomate, |

|                                                                                                                                                                                                                                     |                          |
|-------------------------------------------------------------------------------------------------------------------------------------------------------------------------------------------------------------------------------------|--------------------------|
| humano que habitualmente se sirve crudo y que se cultiva en contacto directo con efluentes                                                                                                                                          | repollo, espinacas, etc. |
| Riego de parques y prados con libre acceso al publico inmediatamente tras el riego, siempre que durante el riego por aspersión estas áreas se encuentren cercadas y no haya acceso libre a por lo menos 15 metros de la zona regada | Parque y zonas verdes.10 |

Fuente; Unión Temporal Saneamiento Río Bogotá. 2002

6.7.3.6.2.6. “Otro de los usos más desarrollados en el mundo es el urbano, el cual ha tomado gran importancia, por la optimización del recurso en las ciudades que demandan cantidades considerables del agua. Se identifican igualmente los tipos de uso, restringido y no restringido, donde la restricción está relacionada con el grado de contacto que tengan las personas con el agua residual, es decir, el riego en un área donde las personas tienen prohibido el acceso es un uso restringido y por lo tanto la calidad del agua podrá ser menor.

6.7.3.6.2.7. “En los usos de tipo no restringido están el riego de lugares públicos como por ejemplo campos deportivos y cementerios, los usos comerciales y los usos domésticos, siendo estos últimos los que requieren una mayor calidad de agua debido al riesgo que pueden representar para la salud humana. En la **Tabla 7** se encuentran unos ejemplos de usos urbanos que pueden ser aplicados a las condiciones de los centros poblados de la cuenca del RB y otros como los domésticos que representan unos elevados costos de tratamiento y se hacen no viables actualmente.

**6.7.3.6.2.7.1. “Tabla 7**  
**“USO URBANO (2)**

6.7.3.6.2.7.1.1. **“Tipo de uso restringido:** Riego de lugares con acceso al público, usos comerciales y domésticos

6.7.3.6.2.7.1.2. “Nivel de calidad del agua residual: Alta a Muy Alta en los usos domésticos.

| USO URBANO (1)                                                                |                                                                                                                                                                                                                                 |
|-------------------------------------------------------------------------------|---------------------------------------------------------------------------------------------------------------------------------------------------------------------------------------------------------------------------------|
| Tipo de uso no restringido: Riego en lugares con acceso al público prohibido. |                                                                                                                                                                                                                                 |
| Nivel de calidad del agua residual: Baja                                      |                                                                                                                                                                                                                                 |
| Aplicación                                                                    | Ejemplos                                                                                                                                                                                                                        |
| Áreas de acceso al publico prohibido                                          | Campos de pasto<br>Sitios de silvicultura.                                                                                                                                                                                      |
|                                                                               |                                                                                                                                                                                                                                 |
| Áreas de acceso al público (hay contacto de las personas con el lugar de uso) | Parques públicos, centros recreativos, campos deportivos (Ej.: fútbol y golf), jardines de escuelas, cementerios y áreas verdes en edificios públicos entre otros                                                               |
| Usos Comerciales                                                              | Lavado de carros, lavado de ventanas, agua de mezcla para pesticidas, herbicidas y fertilizantes, control de polvo en la producción de cemento y concreto en obras, incendios, excusados de centros comerciales e industriales. |
| Usos Domésticos                                                               | No potable, potable indirecto y potable directo.                                                                                                                                                                                |

6.7.3.6.3. ESTÁNDARES DE CALIDAD DE AGUAS RESIDUALES

6.7.3.6.3.1. “El principio fundamental de la aplicación de estándares de calidad debe ser que estos sean realistas y aplicables a la condición del área de influencia. No es apropiado establecer unos estándares de

calidad para el río o los vertimientos que implique mucho tiempo para llegar a ellos y pretender que la comunidad suspenda toda actividad de desarrollo que no los satisfaga. En cambio, sí se identifican usos posibles que no representan riesgo ni para la población ni para los recursos naturales, se pueden establecer criterios de calidad iniciales a partir del conocimiento del uso del agua en la cuenca y en la medida que estos criterios de calidad permitan desarrollar actividades productivas propias de la condición socioeconómica de la región, se está dando una salida que busca la sostenibilidad tanto para el recurso como para la actividad económica.

6.7.3.6.3.2. “Como se ha dicho repetidamente, la elevación paulatina de los estándares de calidad debe ser un proceso gradual y estar en estrecha concordancia con la situación socioeconómica de la cuenca, que para este caso es la del RB. Este proceso se debe ir dirigido a la obtención de metas ambientales.

6.7.3.6.3.3. “Entonces es claro que el punto de partida de una propuesta de criterios de calidad iniciales para el RB, está en los usos deseables y posibles del mismo. Por lo tanto de la selección de estos usos va a depender el valor que se le de al RB como fuente de agua y eje dinamizador del territorio.

6.7.3.6.3.4. A través de la participación de las personas que conocen la Cuenca de RB, se puede determinar, cual será el escenario más probable en el horizonte de análisis, correspondiente a 10 años en nuestro caso.

6.7.3.6.3.5. “Es importante mencionar que en la actualidad existen usos del agua inadecuados y sin control, que no cumplen con los parámetros básicos para una determinada actividad. Un ejemplo de ello es el riego de hortalizas en la Sabana de Bogotá con agua cruda del RB.

6.7.3.6.3.6. “Después de realizar una recopilación y análisis de estándares de calidad para el uso de aguas residuales en diferentes países, regiones y en Colombia, se encontró que los estándares nacionales son replicas de otros que han sido desarrollados en países como EE.UU., México, Perú e Israel y regiones como Arizona y California en EE.UU. Estos estándares han sido basados en investigaciones realizadas en estos sitios y por lo tanto lo apropiado es tomarlos como ejemplo, pero establecer estándares propios concordantes con las características del territorio al cual se aplican, en este caso la cuenca del RB.

6.7.3.6.3.7. “Los estándares que se presentan en la **Tabla 8**, para cada uno de los tipos de usos descritos, sirven de guía para establecer el rango en el que deben estar los parámetros de calidad del agua del RB, para lograr un uso que no represente riesgo ni para la salud humana ni para los recursos naturales (ver folio 42 a 49)).

6.7.3.6.3.8. “Acerca de estas tablas se puede concluir lo siguiente:

- “Los estándares según el tipo de uso se consideran restringidos y no restringidos, siendo estos últimos los que se refieren al contacto directo de las personas con el agua usada, por lo tanto el contenido de coliformes totales tiene que ser bajo, menos de 1000 organismos por 100 ml en los casos más flexibles.
- “El oxígeno disuelto no es un parámetro que se encuentre explícito en las normatividades de usos agrícolas y urbanos, pero no hay que olvidar que va directamente ligado a otros parámetros como la DBO, los SST y la DQO, que si está explícitamente.

- “De acuerdo con el tipo de uso, varía la importancia de uno u otro parámetro de calidad.
- “Los valores permisibles de concentración de químicos son muy constantes en todas las normas bien sea en los casos de uso restringido y no restringido.
- “El valor de los nematodos intestinales para actividades agrícolas, debe ser menor de 1 (No promedio de huevos viables por litro), en el caso de usos urbanos restringidos puede llegar a 5.

6.7.3.6.3.9. “Al hacer el análisis comparativo de los estándares de calidad del agua para países de diversos grados de desarrollo, se encuentra que los mas estrictos corresponden a los mas avanzados. Para que los estándares sean aplicables y realistas es necesario tener en cuenta las condiciones socioeconómicas y ambientales de cada región. Por lo tanto los estándares que se propongan en este trabajo para ser factibles deben ser similares a aquellos en uso en países con un grado de desarrollo semejante al de Colombia. Sin embargo los estándares relativos a sustancias de interés sanitario, si deben mantener el rigor correspondiente a sus efectos sobre el ser humano.

#### **6.7.3.6.4. SITUACIÓN ACTUAL Y FUTURA DE LA CUENCA DEL RB**

##### **6.7.3.6.4.1. CONSIDERACIONES INICIALES DE USOS Y ESTÁNDARES DE CALIDAD EN EL RB**

“A continuación se presentan los criterios generales que se han adoptado, para conformar el sistema de saneamiento de la Cuenca media del RB, así como los objetivos del trabajo tendientes a identificarlo y precisarlo de acuerdo con las condiciones ambientales y socioeconómicas de su cuenca.

#### 6.7.3.6.4.1.1. Criterios generales

- “Se debe buscar que la solución dada al saneamiento del Río Bogotá sea sostenible de acuerdo con los criterios de trabajo adoptados.
- “Se debe buscar el mejoramiento de la calidad del agua del RB a lo largo de su curso de manera homogénea y no avanzar en el nivel de tratamiento por partes sin tener en cuenta sus efectos sobre el RB en su conjunto.
- “El sistema de saneamiento del RB en su Cuenca Media debe tener en cuenta la totalidad de la Cuenca del Río, ya que la calidad en cualquier parte de su curso afecta las posibilidades de uso y tratamiento aguas abajo.
- “El saneamiento del RB es un proceso gradual en el tiempo, que debe propender por una mejora paulatina y homogénea de la calidad del agua del Río.
- “El saneamiento del RB no puede separar los aspectos de cantidad de los de calidad. Su planteamiento y manejo debe ser integral.
- “Se deben establecer criterios y estándares de calidad para el agua del RB, que permitan que las instalaciones de saneamiento que

existen y las que se construyan a lo largo de su curso puedan actuar de manera compatible.

- “Se deben establecer estándares de calidad que hagan posible la utilización del agua del RB, para diversos usos agrícolas y urbanos. Estos estándares deben irse haciendo más exigentes con el paso del tiempo.
- “Estos criterios y estándares de calidad para el agua del RB, deben ser realistas de acuerdo con los usos previstos para la misma.
- “La solución a adoptar en las aguas residuales domésticas debe considerar el problema de patógenos, en adición a los indicadores de OD, DBO5 y SST, mientras que la contaminación con sustancias que afecten el proceso de tratamiento, principalmente de origen industrial, deben tratarse prioritariamente en la fuente.
- “Las medidas que se tomen no deben producir en ningún caso, ni en ningún punto en particular, un deterioro mayor al que se produciría sino se hubiera tomado dicha medida.
- “Se debe avanzar en el conocimiento del RB y de sus características y en el perfeccionamiento de los modelos de cantidad y calidad del mismo.
- “El cauce del RB no se debe dejar en seco o con un caudal muy pequeño. En especial debe considerarse esta situación en el tramo de las cadenas de generación.

- “La solución del problema de la Cuenca Media debe resolverse dentro del entorno de la Sabana de Bogotá y no se debe transferir a la Cuenca Baja.
- “Se deben favorecer las soluciones que hagan razonablemente viable la existencia de OD en la Cuenca Media del Río Bogotá.
- “Se debe estudiar cuidadosamente el posible aprovechamiento de los humedales y otros elementos naturales y artificiales que puedan servir como partes del sistema de Saneamiento del RB sin deteriorar su condición.

#### 6.7.3.6.4.1.2. “Objetivo General

- “A partir del conocimiento de la problemática actual y futura del RB, definir los componentes más adecuados y su orden de ejecución para plantear la mejor solución integral para lograr el saneamiento del RB en su Cuenca Media, cumpliendo los criterios y estándares de calidad recomendados.

#### 6.7.3.6.4.1.2. Objetivos específicos

- “Conocer la condición futura de calidad del RB y derivar criterios de calidad y futuras metas de acuerdo con el escenario más probable de actividades socioeconómicas en la cuenca y su forma de ejecución.

- “Establecer el escenario prospectivo más probable para la situación ambiental de la Cuenca del RB.
- “Analizar las soluciones tecnológicas más modernas y eficientes para el tratamiento de aguas residuales urbanas y escoger las más apropiadas para el caso de la cuenca media del RB.
- “Establecer las características básicas técnicas, de costo, de tiempo de planeación y de implementación de las componentes tecnológicas de la solución.
- “Ordenar las componentes técnicas de manera que su entrada en operación sea programada de forma tal que produzca los resultados de la manera más rápida, eficaz y eficiente.
- “Sugerir estrategias en los campos económico, cultural y normativo para lograr una solución integral y proactiva al problema del saneamiento del RB.

#### **6.7.3.6.4.1.3. Problemática ambiental general de la Cuenca del Río Bogotá.**

“A pesar de que el análisis se ha realizado de manera separada para las tres divisiones citadas, a continuación se transcribe, con propósitos ilustrativos, la descripción de la problemática ambiental general de la cuenca del RB que se hace en el documento titulado Plan de Gestión Ambiental 2001-2010. Plan de Acción Trienal 2001-2002 de la CAR.

##### **6.7.3.6.4.1.3.1. Afectaciones al suelo y a la vegetación**

6.7.3.6.4.1.3.1.1. “En las zonas de páramo y subpáramo, por encima de 3.000 msnm, avanza un proceso de destrucción de la cobertura vegetal para destinar estos terrenos al cultivo de papa, inicialmente, y luego a pastizales para una ganadería extensiva, con los consiguientes daños en estos frágiles ecosistemas, que repercuten en todo el territorio.

6.7.3.6.4.1.3.1.2. “En el 56% de la cuenca se presentan procesos erosivos de grado ligero a moderado, debidos principalmente al escurrimiento superficial sobre tierras sin cobertura vegetal utilizadas en actividades agrícolas y pecuarias. Erosión moderada y severa se observa en el 9.5% de la cuenca y la muy severa en el 0.3%. Las subcuencas más afectadas son las del Alto Bogotá, Embalse Tominé -Río Aves y río Teusacá en los sectores alto y medio de la cuenca; en el bajo Bogotá las cuencas de los ríos Calandaima y Apulo, como también las de las quebradas Santa Marta, Seca y Puna; en todas ellas los procesos de erosión ligera a moderada cubren cerca de la mitad de su superficie.

6.7.3.6.4.1.3.1.3. “Se presenta un gran número de situaciones que generan conflicto por uso del suelo al no ser compatible con la aptitud natural; los principales se deben a la transformación de ecosistemas que prestan servicios ambientales, principalmente oferta hídrica, en áreas de pastoreo y de cultivos (12,9% del total de la cuenca); lo anotado es evidente en las subcuencas del alto Bogotá, río Neusa, Embalse Tominé - río Aves y quebrada Seca).

6.7.3.6.4.1.3.1.4. “En las áreas para producción intensiva, en suelos con limitaciones edáficas, los conflictos llegan al 28,7% de la cuenca, 163.201 ha; allí los antagonismos son relevantes por prácticas de manejo incompatibles con las propiedades de los suelos, con efectos debidos a la labranza intensiva del suelo y al uso de agroquímicos con impactos residuales sobre el medio.

#### 6.7.3.6.4.1.3.2. Uso Recreativo (2) o Primario

6.7.3.6.4.1.3.2.1. **“Tipo de uso no restringido:** Cuando las personas están en contacto directo prolongado con el agua, como en natación, buceo y esquí acuático.

6.7.3.6.4.1.3.2.2. **“Nivel de calidad del agua residual:** Muy Alta

6.7.3.6.4.1.3.2.2.1. “Los estándares según el tipo de uso se consideran restringidos y no restringidos, siendo estos últimos los que se refieren al contacto directo de las personas con el agua usada, por lo tanto el contenido de coliformes totales tiene que ser bajo, menos de 1000 organismos por 100 ml en los casos más flexibles.

- “El oxígeno disuelto no es un parámetro que se encuentre explícito en las normatividades de usos agrícolas y urbanos, pero no hay que olvidar que va directamente ligado a otros parámetros como la DBO, los SST y la DQO, que si lo está.
- “De acuerdo con el tipo de uso, varía la importancia de uno u otro parámetro de calidad.

#### 6.7.3.6.5. DE LOS COMPONENTES DE LAS ALTERNATIVAS

6.7.3.6.5.1. “Con base en el estudio poblacional acabado de relacionar las investigaciones apuntas hacia las alternativas a seguir así (ver cuaderno “Estudios Técnicos Noviembre de 2003):

6.7.3.6.5.2. “Las dimensiones y capacidades de los elementos de las alternativas de saneamiento presentadas en los **Esquemas 3.1** (tres plantas), **3.2** (dos plantas), **3.3** y **3.4** (estas dos últimas son subalternativas de acuerdo con la ubicación de la segunda PTAR, bien sea en la desembocadura del Tunjuelo o en Canoas, denominadas Salitre-Tunjuelo, Salitre-Canoas. En ambos casos se propone un tratamiento (TPQA) y se identifican en el texto como alternativas 3 y 4 respectivamente), se obtuvieron determinando las áreas de drenaje correspondientes, de manera que cubrieran toda el área de servicio sanitario del Distrito y el municipio de Soacha, con lo cual se obtuvieron las longitudes, considerando además los corredores disponibles. Para obtener las dimensiones, se estimó la población localizada en las áreas de drenaje y su proyección en el tiempo hasta la saturación, y con base en las estadísticas de consumo de agua potable del ACUEDUCTO, se estimaron los caudales sanitarios que llegan a cada elemento.

6.7.3.6.5.3. “El documento Población, Caudales y Cargas Contaminantes, realizado por la UT en el año 2002, presenta las proyecciones para la cuenca Salitre incluyendo las de Torca, Conejera y Jaboque; la cuenca de Fucha incluyendo parte de la de Tintal; y la cuenca de Tunjuelo incluyendo el resto de la de Tintal y la de Soacha, cuyas cifras fueron utilizadas para establecer las características de buena parte de los elementos constitutivos de las alternativas.

6.7.3.6.5.4. “Las características de los componentes de cada una de las alternativas de saneamiento se sintetizan en los **Cuadros 4.1, 4.2 y 4.3**, las cuales proceden de trabajos contratados por el ACUEDUCTO recientemente, tal como se describe a continuación.

6.7.3.6.5.5. “La longitud y las dimensiones de algunas conducciones fueron obtenidas de varios diseños como es el caso del Interceptor Engativá - Cortijo realizado por IHS en el año 2001, y los Interceptores

Fucha - Tunjuelo y Fucha parte baja, actualmente en elaboración por HMV. El Interceptor Río Bogotá en la actualidad está construido.

6.7.3.6.5.6. “Las demás conducciones consideradas en las distintas alternativas cuentan con prediseños recientes como es el caso del Interceptor Tintal (Gibraltar-Tunjuelo) que fue predimensionado por HE Ingenieros; en tanto que el emisario Canoas-Alicachín y los interceptores Tunjuelo-Canoas, Soacha y Tintal Norte fueron predimensionados por la UTSRB, a partir de los caudales sanitarios a saturación proyectados en el Informe de Población, Caudales y Cargas Contaminantes, de donde además, se obtuvieron las áreas y poblaciones beneficiadas que se presentan en los **Cuadros 4.1, 4.2 y 4.3**.

6.7.3.6.5.7. “Igualmente, la capacidad de las plantas de tratamiento de aguas residuales, PTARS, se estableció con base en el total de los caudales sanitarios aferentes a éstas, al igual que las estaciones elevadoras, cuya altura dinámica se obtuvo de los trazados realizados en el informe de Alternativas de Interceptores, realizado por la UT en el año 2002, y el informe de Alternativas del Interceptor Tunjuelo - Canoas - Alicachín, realizado por el Consultor Carlos Alberto Giraldo en el año 2003.

#### 6.7.3.6.6. Análisis De Alternativas

##### 6.7.3.6.6.1. . “Enfoque Y Metodología

6.7.3.6.6.1.1. “La comparación de las alternativas analizadas para el saneamiento del Río Bogotá en su cuenca media se realizó desde dos

perspectivas. La primera comparando los costos de cada una de ellas y estableciendo los respectivos cronogramas de inversiones de tal manera que los beneficios asociados con ellas sean iguales.

6.7.3.6.6.1.2. “La metodología parte de seleccionar una alternativa como base de comparación, que en el presente caso la constituye la de dos plantas utilizando Canoas con tratamiento TPQA, es decir la Alternativa 4 presentada en el **Esquema 3.4** y se definen cronológicamente y en forma cualitativa los beneficios que se van obteniendo. El desarrollo de las demás alternativas se organiza de tal manera que se obtenga el mismo cronograma de beneficios. La alternativa que presente un menor valor presente de costos de inversión y operación, es la que traería los beneficios ambientales y económicos esperados con el menor costo y por lo tanto es la seleccionada.

6.7.3.6.6.1.3. “La segunda perspectiva toma como base la alternativa actual (1993) con la capacidad ampliada, considerando un nivel de tratamiento primario químicamente asistido TPQA, es decir la Alternativa presentada en el **Esquema 3.1** y distribuye las inversiones de las demás en forma tal que su valor presente, más el de los costos de operación asociados, sean iguales a los de la alternativa base. Con dicho cronograma es posible definir cuándo se lograrán los beneficios cualitativos asociados con el cambio del uso posible del agua y concluir que la mejor alternativa es la que produce beneficios más rápidamente con el mismo costo.

6.7.3.6.6.1.4. “Para efectos de comparación se ha utilizado un período de tiempo hasta el año 2027, que corresponde al período de la actual concesión, y una tasa de descuento del 12% anual en dólares constantes del 2002.

6.7.3.6.6.1.5. “Por otra parte la valoración cualitativa de beneficios se realizó adoptando como referencia los usos posibles del agua determinados con base en las características fisicoquímicas M efluente y del agua del Río Bogotá, basados en lo establecido en el Capítulo 3 del informe *"Programa de Saneamiento del Río Bogotá Alternativa a Seguir"* (Acueducto Julio 2003). Cualquier tipo de inversión en tratamiento que no conlleve una mejora en el nivel de uso del agua representa un costo con beneficio asociado nulo. Se adoptó el criterio de que las inversiones que produzcan el mismo nivel de uso del agua tienen los mismos beneficios.

6.7.3.6.6.1.6. “Los anteriores criterios llevan a concluir rápidamente que sólo vale la pena realizar las menores inversiones requeridas para lograr el cambio buscado en el uso del agua y que cualquier e inversión adicional traería un beneficio marginal poco significativo.

6.7.3.6.6.1.7. “La aplicación de la metodología expuesta a los efectos que causen las diferentes alternativas de saneamiento sobre la cuenca media del Río Bogotá es relativamente simple. Sin embargo, es necesario considerar también los efectos que se causen hacia aguas abajo, que aunque son de menor impacto son más complejos de estimar y tienen incidencia en la valoración de cada una de las alternativas.

6.7.3.6.6.1.8. “El efecto real de las acciones que se tomen en la cuenca media sobre los niveles de uso del agua en la cuenca baja tiene que ver con la existencia de oxígeno disuelto en el río. Bajo las condiciones actuales de carga contaminante el Río Bogotá, debido a su alta capacidad de autodepuración en la parte inicial de la cuenca baja, aún conserva niveles de oxígeno disuelto, que aunque están lejos de los valores adecuados para la preservación ecológica, ofrecen características que permiten la utilización del agua para múltiples usos, siempre y cuando se controle el contenido de patógenos.

6.7.3.6.6.1.9. “Sin embargo, dicha capacidad de autodepuración tiene un límite y el aumento significativo de la carga contaminante de las cuencas alta y media, en especial de la ciudad de Bogotá, terminaría produciendo una condición anóxica del río en la cuenca baja, si no se retira oportunamente la cantidad de carga que no es capaz de autodepurar el río en dicho sector. Por consiguiente, para hacer comparables las alternativas es necesario considerar la necesidad de retirar dicha carga adicional a más tardar hacia el año 2020.

6.7.3.6.6.1.10. “Un elemento cuya respuesta a cada una de las alternativas de saneamiento del Río Bogotá es mucho más compleja de predecir es su efecto sobre el Embalse del Muña. Los estudios disponibles manifiestan que la principal problemática actual se genera a partir de la alta cantidad de nutrientes (fósforo y nitrógeno) que ingresan al embalse al bombear agua del río Bogotá, los cuales causan una fuerte eutroficación, ocasionando el crecimiento incontrolado de buchón y la consecuente proliferación de mosquitos. Dichos nutrientes no son removidos por los niveles de tratamiento especificados en el período de análisis y por lo tanto los actuales problemas deben ser manejados en un primer período con medidas directas en el embalse.

6.7.3.6.6.1.11. “Complementariamente no se puede dejar de considerar que a largo plazo, al igual que para la cuenca baja, es necesaria la remoción de la carga orgánica contaminante que exceda a la capacidad de asimilación del embalse, la cual a su vez va a depender de su función dentro de todo el Programa de Saneamiento del Río Bogotá y de las obras y acciones que se lleven a cabo directamente dentro del cuerpo de agua y su zona circundante.

6.7.3.6.6.1.12. “Las inversiones requeridas y los costos asociados con el proceso de desinfección no se han considerado dentro de la comparación

de alternativas, debido a que los valores asociados con ellas son muy similares. La determinación de la necesidad de desinfectar y sus costos asociados se discutirá más adelante.

6.7.3.6.6.1.13. **“La alternativa definida en 1993, que se encuentra descrita en el POT de Bogotá del año 2000, se descarta debido a que la capacidad adoptada para las plantas es insuficiente para tratar la totalidad de los caudales que producen las cuencas aferentes de la ciudad de Bogotá.** Por lo tanto la contaminación producida por los vertimientos directos al río que no pueden ser tratados debido a la limitada capacidad de las plantas, deteriora su calidad de tal forma que no es posible mejorar las características de uso del agua. Dicha situación lleva a concluir que los beneficios asociados con esta inversión no son significativos y que por lo tanto dicha alternativa no es justificable.

6.7.3.6.6.1.14. **“Dadas las características del proyecto solamente las alternativas que sean capaces de manejar la totalidad de los caudales sanitarios producidos generan beneficios.**

6.7.3.6.6.1.15. “Por otra parte, por medio de la aplicación del modelo de calidad del agua del río Bogotá desarrollado por la Universidad de Los Andes, se ha demostrado que llevar el tratamiento al nivel secundario no produce mejoras en la calidad del efluente o del Río Bogotá que permitan un uso diferente al posible con tratamiento primario químicamente asistido (TPQA). Siendo más costosa la inversión y la operación de los sistemas de tratamiento secundario, no es justificable considerar dentro del período de diseño esta alternativa, ya que aunque produce una disminución en el pago de las tasas retributivas al obtenerse una menor cantidad de SST y DBO<sub>5</sub> en el efluente, dicho ahorro en costos está lejos de compensar los mayores valores de inversión y de operación del tratamiento secundario.

6.7.3.6.6.1.16. “Es así como se realizaron diferentes modelaciones de la calidad del agua en la cuenca baja del río simulando diferentes alternativas de Saneamiento en la cuenca media, en las que se incluyen el dragado propuesto por HE Ingenieros en el año 2000 y la implementación de las obras de mitigación y adecuación del Muña. Los resultados de estas modelaciones se encuentran anexas a este documento, el las **Figuras 5.1 a 5.4** para NKT, OD, SST y DBO en la cuenca baja.

6.7.3.6.6.1.17. “Sin embargo, en el largo plazo la ciudad debe prever la necesidad de mejorar paulatinamente los estándares de calidad, para lo cual es conveniente dejar provisiones, especialmente en área disponible, en los sitios donde se van a construir las PTARs para poder llevar a cabo niveles de tratamiento superiores, inclusive terciario.

6.7.3.6.6.1.18. “La alternativa de las tres plantas con tratamiento secundario, ésta se incluirá como referencia dentro de los análisis de comparación de alternativas y se identificará como **Alternativa 1**.

6.7.3.6.6.1.19. “En consideración a los anteriores argumentos, la comparación de alternativas se limitó al nivel de tratamiento primario químicamente asistido para las tres disposiciones básicas, a saber:

- “**Alternativa 2.-** Tres plantas de tratamiento cada una en la desembocadura de los ríos Salitre, Fucha y Tunjuelo, y demás componentes complementarios.
- “**Alternativa 3.-** Dos plantas de tratamiento una en la desembocadura del Río Salitre y otra en la desembocadura del Río Tunjuelo, y demás componentes complementarios.

- “**Alternativa 4.-** Dos plantas de tratamiento una en la desembocadura del Río Salitre y otra en el sitio de Canoas en el Municipio de Soacha, y demás componentes complementarios.

6.7.3.6.6.1.20. “Valor presente que asciende a US\$ 454 millones. En tercer lugar se encuentra la de tres plantas TPQA con US\$ 473 millones y la más costosa es la Alternativa 1 (1993 -Actual) con US\$ 758 millones.

6.7.3.6.6.1.20. “Es claro que la alternativa más atractiva es la de dos plantas con PTAR en Canoas (Alternativa 4), la cual tiene un valor presente de costos de inversión y de operación equivalente al 79% del costo de las otras dos alternativas con TPQA y del 48% de la alternativa de 1993.

#### 6.7.3.6.6.2. “Comparación por Beneficios

6.7.3.6.6.2.1. “La segunda manera utilizada para evaluar las alternativas consiste en comparar los beneficios obtenidos ordenando cronológicamente la entrada de cada componente en forma tal que se logre un valor presente de las inversiones y de los costos de operación similar en todas ellas. La alternativa seleccionada como base de comparación es la Alternativa 2, con un cronograma de inversiones similar al actual cronograma de obras que está contemplado en la alternativa de 1993, tal como se aprecia en el **Cuadro 5.7**. Se escogió esta alternativa como base de la comparación, ya que con la alternativa de 1993 no era posible igualar los valores presentes por su gran diferencia en costos frente a las demás. El costo de la PTAR Salitre con tratamiento secundario al inicio del período considerado, sin considerar las otras plantas, equivale prácticamente al costo del desarrollo completo de las alternativas con TPQA, considerando los valores presentes indicados en los **Cuadros 5.6 a 5.9**.

6.7.3.6.6.2.2. “El anterior análisis es solamente la confirmación de que mientras las metas de usos y estándares se mantengan, es improcedente pensar en llevar las PTARs a un tratamiento superior al TPQA.

6.7.3.6.6.2.3.. “Como se dijo anteriormente, el criterio para distribuir las inversiones de la alternativa base, fue el de conservar las mismas fechas de puesta en operación plena de cada planta según el actual esquema de 1993. Por consiguiente, la entrada de la ampliación de la planta Salitre se fijó para el año 2004, la entrada de la planta Fucha para el año 2011 y la entrada de la planta Tunjuelo para el año 2018. La construcción de los interceptores se programó de conformidad con el plan de inversiones del Acueducto, ya que su función primordial que es el drenaje de las aguas sanitarias de la ciudad, no puede ser pospuesta en el tiempo, con excepción del interceptor Tunjuelo - Canoas, que tiene como objetivo fundamental el saneamiento del Río Bogotá desde la desembocadura del Río Tunjuelo hasta el sitio de Alicachín.

6.7.3.6.6.2.4. “El **Cuadro 5.7** muestra el programa de inversiones propuesto y los costos operativos causados para la Alternativa 2, los cuales en valor presente ascienden a la suma de US\$ 349 millones, valor muy cercano a los US\$ 333 millones que representa llegar apenas a construir y operar la planta Salitre con tratamiento secundario, como se aprecia en el **Cuadro 5.6**.

6.7.3.6.6.2.5. “Las inversiones previstas en el **Cuadro 5.7** muestran que para el año 2004 se obtendrá el saneamiento del tramo del río entre la desembocadura del Río Salitre y la desembocadura del Río Fucha. Para el año 2011 entre las desembocaduras de los ríos Fucha y Tunjuelo y para el año 2018 desde la desembocadura del Río Tunjuelo hasta el sitio de Alicachín. Esta alternativa garantiza la conservación del río en la cuenca baja en una condición aceptable, con algún contenido de oxígeno disuelto.

6.7.3.6.6.2.6. “El cronograma de inversiones de la Alternativa 3 que tiene un valor presente similar, incluye la ampliación de la planta Salitre también para el 2004, así como la construcción de los principales interceptores para las mismas fechas empleadas en la anterior alternativa. El cambio principal está en la entrada en operación del interceptor Fucha - Tunjuelo para el año 2008, el cual producirá el saneamiento del tramo entre las desembocaduras de los ríos Fucha y Tunjuelo tres años antes que en la anterior. Por otra parte se puede adelantar la entrada de la planta Tunjuelo para el año 2015, adelantando también en tres años el saneamiento del tramo Tunjuelo - Alicachín. El valor presente de esta alternativa es de US\$ 354 millones, prácticamente igual al de la anterior, pero con ella se obtienen los beneficios ambientales en las dos terceras partes del recorrido del río en la cuenca media tres años antes, tal como se observa en el **Cuadro 5.10**. Esta alternativa al igual que la anterior conserva en una condición aceptable el río en la cuenca baja.

6.7.3.6.6.2.7. “De la misma forma para la Alternativa 4 con un valor presente similar, se obtiene un cronograma de inversiones semejante al expuesto en el **Cuadro 5.4**, con los efectos de adelantar la ampliación de la planta Salitre un año, para equiparar en este aspecto las dos alternativas anteriores y el aplazamiento de la planta Canoas dos años. La diferencia más importante de esta alternativa con las dos anteriores es la construcción del interceptor Tunjuelo - Canoas, que adelanta el saneamiento del tramo Tunjuelo -Alicachin al año 2009, conservando el saneamiento del tramo Fucha - Tunjuelo en el año 2008.

6.7.3.6.6.2.8. “La principal ventaja de esta alternativa es que, en igualdad de costos, completa el saneamiento de toda la cuenca media del Río Bogotá seis años antes que la Alternativa 3 y nueve años antes que la Alternativa 2.

6.7.3.6.6.2.9. “La desventaja de esta alternativa con respecto a las otras dos, es que la carga contaminante que llega a la cuenca baja del río es mayor durante siete años comparada con la Alternativa 2 y durante tres años comparada con la Alternativa 3. Se considera que estas mayores cargas no deben producir un deterioro significativo de la cuenca baja durante el lapso en que esta alternativa no cuenta con la planta Canoas.

### **6.7.3.6.6.3. “Alternativa Seleccionada**

#### **6.7.3.6.6.3.1. “Manejo Integral del Saneamiento del Río Bogotá**

6.7.3.6.6.3.1.1. “Con base en los anteriores análisis la Alternativa seleccionada corresponde a la de dos plantas con PTAR en Canoas, y su ventaja se deriva del hecho que aprovecha mejor la capacidad de asimilación natural que tiene el Río Bogotá. Como se aprecia en la **Figura 5.5**, esta capacidad del río en su cuenca alta, teniendo en cuenta los usos y estándares de calidad previstos, es menor que la carga contaminante que produce la cuenca, por lo que es necesario remover la carga excedente con plantas de tratamiento. La CAR ha venido adelantando un programa para suplir esta necesidad. En la zona baja de la cuenca alta esta falencia es más notoria, debido principalmente a la disminución de caudal del río aguas abajo de Tibitoc y a la existencia de poblaciones importantes como Zipaquirá y Chía, que le entregan una carga contaminante significativa.

6.7.3.6.6.3.1.2. “La situación en la cuenca media es muy crítica, ya que este sector del río presenta la menor capacidad de asimilación y por mucho la mayor cantidad de carga contaminante aportada. Para lograr los usos y estándares de calidad previstos es necesario tratar la totalidad

de las aguas sanitarias producidas por Bogotá, mediante la construcción de plantas de tratamiento.

6.7.3.6.6.3.1.3. **“La cuenca baja presenta por el contrario una gran capacidad de asimilación debido a la diferencia de nivel que tiene el perfil hidráulico del río, ya sea por su cauce o a través de las tuberías de la cadena generadora, que le introduce, en las turbinas gran cantidad de oxígeno disuelto, que aún con las actuales cargas contaminantes de Bogotá mantiene en condiciones aeróbicas todo el recorrido del río hasta su desembocadura en Girardot. Con estas condiciones su capacidad de asimilación para los usos y estándares previstos supera varias veces la carga contaminante que produce la cuenca baja.**

6.7.3.6.6.3.1.4. **“Esta última característica abre la posibilidad de manejar parte de la carga contaminante de la cuenca media transportándola hasta la cuenca baja, sin que se alteren los usos previstos del río.**

6.7.3.6.6.3.1.5. **“La Alternativa 4 hace uso de esta característica mediante la construcción de interceptores que recogen la carga contaminante de la cuenca media antes de llegar al río y la descarga al inicio de la cuenca baja donde el sistema presenta una muy buena capacidad de asimilación. En la Figura 5.5 se presenta el Manejo Integral del Saneamiento del Río Bogotá, con base en las consideraciones expuestas.**

6.7.3.6.6.3.2. **“Descripción de la Alternativa Seleccionada**

6.7.3.6.6.3.2.1. **“La alternativa seleccionada, Alternativa 4, consta de los siguientes componentes principales:**

-“Ampliación de la PTAR Salitre y adecuación a TPQA.

-“Construcción del Interceptor Engativá - Cortijo.

-“Construcción del Interceptor Fucha - Tunjuelo y de la estación elevadora de Tunjuelo.

- “Construcción del Interceptor Tunjuelo - Canoas, la estación elevadora de Canoas y del Interceptor Canoas - Alicachín.

- “Construcción de la PTAR Canoas.

-“Intercepción de las aguas residuales que llegan a los canales de aguas lluvias.

6.7.3.6.6.3.2.2. “En la cuenca Salitre en la actualidad el sistema de conducción está prácticamente terminado, faltando únicamente la construcción del Interceptor Engativá-Cortijo, cuyo proceso licitatorio está previsto para principios del año 2004.

6.7.3.6.6.3.2.3. “Por su parte, la PTAR Salitre que actualmente está construida en su fase de tratamiento primario con una capacidad de 4 m<sup>3</sup>/s, requiere ser ampliada hasta 8 m<sup>3</sup>/S y adaptada para el tratamiento primario químicamente asistido. Adicionalmente requiere el ajuste de la estación elevadora tanto en su capacidad, hasta 40 m<sup>3</sup>/S, como en su nivel hasta 2 m por debajo del nivel actual de captación, aproximadamente.

6.7.3.6.6.3.2.4. “Respecto a las obras de las cuencas del sur de la Ciudad, se encuentran en etapa de diseño el interceptor Fucha - Tunjuelo con su respectivo pondaje, así como la estación elevadora de Tunjuelo. Dicha obra está prevista para ser licitada durante el año 2004 y debe entrar en operación en el año 2008.

6.7.3.6.6.3.2.5. “Aunque no hace parte de la obras de saneamiento del río Bogotá sino del alcantarillado de la Ciudad, vale la pena mencionar, por su impacto sobre éstas, que los diseños del Interceptor Tunjuelo Bajo Izquierdo ya están disponibles. Dicho interceptor será licitado el próximo año y debe entrar en operación en el 2006, fecha para la cual también debe estar operando la estación elevadora del Tunjuelo. Dentro de las obras complementarias del interceptor y de la estación elevadora, inmediatamente aguas arriba de ella, se encuentra un pondaje que tiene por objeto amortiguar los aportes de aguas lluvias antes que le lleguen.

6.7.3.6.6.3.2.6. “Por otra parte, los elementos de conducción desde la estación elevadora de Tunjuelo hasta los predios de la PTAR de Canoas, cuentan con predimensionamientos, realizados para los estimativos de presupuesto de las Alternativas. Se prevé que mientras el Interceptor Tunjuelo-Canoas- Alicachin y la estación elevadora de Canoas se construyen, la estación elevadora de Tunjuelo descargará provisionalmente las aguas al río Tunjuelo y en el mediano plazo al mencionado Interceptor.

6.7.3.6.6.3.2.7. “La planta de tratamiento de Canoas cuenta en la actualidad con un predimensionamiento. Su diseño y construcción se prevén para más adelante de acuerdo con los cronogramas presentados y los criterios expuestos anteriormente.

6.7.3.6.6.3.2.8. “Dado en el análisis comparativo del numeral anterior no consideró el proceso de desinfección, se elaboró el Cuadro 5.11, el cual tiene en cuenta este complemento al tratamiento en la PTAR de Salitre, mientras que en la PTAR de Canoas no se incluyen estos costos puesto que en la actualidad es motivo de análisis el efecto sobre el embalse del Muña.

6.7.3.6.6.3.2.9. “El valor presente de la Alternativa seleccionada incluyendo el proceso de desinfección en la PTAR Salitre, asciende a US\$ 371 millones. El valor adicional de la inversión en el sistema de desinfección sin descontar es de US\$ 4.9 millones y la operación anual asciende a la suma de US\$ 0.9 millones para el caudal de saturación de la cuenca Salitre.

#### **6.7.3.6.6.4. Esquemas De Las Alternativas**

6.7.3.6.6.4.1. “En los **Esquemas 3.1, 3.2, 3.3 y 3.4** se presentan las Alternativas 1, 2, 3 y 4, para el sistema de saneamiento del río Bogotá seleccionadas para evaluación, las cuales tienen como punto de inicio la planta de tratamiento Salitre con nivel de tratamiento primario y se diferencian esencialmente en el número de plantas y en la calidad del agua en el río.

6.7.3.6.6.4.2. “La primera es la alternativa de las tres plantas, compuesta esencialmente por las plantas de Salitre, Fucha y Tunjuelo y un sistema de interceptores, de los cuales Salitre y Fucha están en operación y Tunjuelo bajo proyectado, hacen parte del sistema de alcantarillado de la ciudad. Los interceptores RB ya en operación y Engativá-Cortijo, Fucha parte baja, Tintal norte, Tintal y Soacha proyectados, hacen parte del sistema de saneamiento del río Bogotá.

6.7.3.6.6.4.3. “Esta alternativa presenta dos sub-alternativas, cuya diferencia está en el nivel de tratamiento, la primera de ellas ‘Tratamiento Primario y Secundario’, es la Alternativa 1 (**Esquema 3.1**)

y la segunda ‘Tratamiento Primario Químicamente Asistido – TPQW’, es la Alternativa 2 (**Esquema 3.2.**)

6.7.3.6.6.4.4. “La segunda alternativa es la de las dos plantas, que al igual que la anterior se divide en dos sub-alternativas, que presentan en ambos casos un nivel de tratamiento Primario Químicamente Asistido - TPQW y se diferencian esencialmente por la ubicación de la segunda planta, ya sea en el sector de Tunjuelo, Alternativa 3 (**Esquema 3.3**), o en el sector Canoas Alternativa 4 (**Esquema 3.4**).

6.7.3.6.6.4.5. “Con relación al sistema de conducción de agua residual a las plantas de tratamiento, las dos presentan como componentes comunes los interceptores Salitre y Fucha en operación y Tunjuelo bajo proyectado, que hacen parte del sistema de alcantarillado de la ciudad; e RB en operación y Engativá - Cortijo, Fucha parte baja y Fucha -Tunjuelo proyectados que hacen parte del sistema de saneamiento del río Bogotá y el pondaje Fucha - Tunjuelo. Las diferencias entre ellas radican en que la Alternativa 4 requiere de una estación elevadora en el sector de Tunjuelo, un pondaje en el interceptor Tunjuelo Bajo, el interceptor Tunjuelo-Canoas y el emisario de Alicahín; y la Alternativa 3 requiere el interceptor Soacha.

6.7.3.6.6.4.6. “En cualquier alternativa el Borde Norte del Distrito Capital siempre drenará las aguas hacia el RB y lo llevará a la planta de tratamiento de aguas residuales del Salitre.

## 6.8. DE LOS INTERCEPTORES

### 6.8.1. “Introducción

6.8.1.1. “Este documento presenta el análisis de alternativas del interceptor Tunjuelo-Canoas como complemento del análisis de alternativas de interceptores, realizado por la Unión Temporal Saneamiento Río Bogotá, UTSRB para EL ACUEDUCTO DE BOGOTA en el año 2002.

6.8.1.2. “En dicho estudio, se analizaron varias alternativas del interceptor Tunjuelo. Canoas, operando en conjunto con el interceptor Fucha-Tunjuelo, con la estación elevadora de Tunjuelo, EET, la estación elevadora de Canoas y el emisario Alicachin.

6.8.1.3. “De acuerdo con el esquema seleccionado, el interceptor Tunjuelo-Canoas tiene baja pendiente y una profundidad media de 9.0 m, de tal manera que alcanza a recoger las aguas del Colector Ciudad de Cali del municipio de Soacha, con el que empalma por clave, situación que se consideró restrictiva en su momento para el interceptor quedará mas superficial.

6.8.1.4. “De este planteamiento y de reuniones posteriores con el ACUEDUCTO, se acordó revisar con mayor detalle el interceptor Tunjuelo-Canoas, ante la posibilidad de drenar por bombeo el Colector Ciudad de Cali o desviar éste por gravedad hacia la estación Elevadora de Tunjuelo, lo cual permite dejar el interceptor mas superficial. Este es entonces, el objetivo del presente trabajo, que se apoyará en la información generada por la UTSRB en el año 2002, para el estudio de alternativas de interceptores.

6.8.1.5. “Es necesario indicar que si bien el interceptor Tunjuelo-Canoas tiene continuidad hacia Alicachin por medio del Emisario Alicachín, luego de la Estación Elevadora y la PTAR de Canoas, éste es motivo del presente análisis puesto que ya está definido que será superficial debido a la restricción impuesta por la descarga del río Bogotá.

6.8.1.6. “Este documento presenta una primera parte sobre información antecedente, luego se revisan los criterios de diseño utilizados en el mencionado estudio, de la UTSRB, y posteriormente se hace el planteamiento y evaluación económica de alternativas, para concluir con la descripción detallada de la alternativa seleccionada.

## **6.8.2. “Antecedentes**

6.8.2.1. “El interceptor Tunjuelo-Canoas hace parte de la estrategia recientemente adoptada para el saneamiento del río Bogotá que consiste en la implantación de dos plantas de tratamiento de aguas residuales, PTAR, una en Salitre al norte de la ciudad, y otra la final de la sabana, en el sector de Canoas municipio de Soacha, con un gran interceptor de aguas residuales que capte los aportes de la cuenca de Fucha, Tunjuelo, Tintal y Soacha, y las lleve hasta la PTAR de Canoas.

6.8.2.2. “En efecto, el Interceptor Tunjuelo-Canoas hace parte del gran interceptor, de manera que cubre el trayecto desde el río Tunjuelo hasta Canoas, a continuación del Interceptor Fucha-Tunjuelo, que cubre el resto de la longitud hacia aguas arriba, entre los ríos Fucha y tunjuelo.

6.8.2.3. “La PTAR El Salitre, localizada al norte de la ciudad debe recibir todas las aguas residuales de las cuencas de Torca, Salitre, Conejera y Jaboque, mientras que la PTAR Canoas recibirá las aguas del resto de la ciudad, como son las cuencas de Fucha, Tintal, Tunjuelo y Soacha.

6.8.2.4. “La función del interceptor Tunjuelo-Canoas consiste entonces, en transportar el agua residual desde la estación elevadora de Tunjuelo, en inmediaciones de la confluencia de los ríos Tunjuelo y Bogotá; aguas

que a su vez provienen de las cuencas de Fucha y Tunjuelo a través de los Interceptores Fucha-Tunjuelo y Tunjuelo Bajo Izquierdo. Adicionalmente, recoge durante su recorrido los caudales del municipio de Soacha, hasta llegar a los predios de la futura PTAR de Canoas; posteriormente los efluentes de la planta llegan hasta Alicachín a través del Emisario Alicachín para ser bombeadas al Embalse de Muña.

6.8.2.5. “El interceptor Tunjuelo-Canoas tiene su corredor por la zona rural y plana localizada al occidente del municipio de Soacha, por la margen izquierda del río Bogotá. Su trazado fue definido por la UTSRB en el estudio de la referencia con base en el levantamiento topográfico de una línea, por la que se obtuvo el perfil del terreno.

### **6.8.3. “Criterios De Dimensionamiento**

#### **6.8.3.1 “Trazado**

6.8.3.1.1. “El trazado del Interceptor tunjuelo-Canoas-Alicachín tiene lugar entre el río Tunjuelo y las antiguas instalaciones de la Industria Alicachín, hoy Preved, localizado por el corredor entre el casco urbano del municipio de Soacha y el río Bogotá, que cubre una longitud de 11.5 Km. aproximadamente, 6.5 Km. correspondientes al tramo Tunjuelo-Canoas y el resto al tramo Canoas-Alicachín.

6.8.3.1.2. “El trazado se desarrolla por zonas bajas aledañas al río, eludiendo los cerros que existen en el sector, sin embargo, existen algunas elevaciones insalvables que no abarcan grandes longitudes, como son el cerro de Indumil, la Avenida Indumil y la Avenida Longitudinal de la Sabana.

6.8.3.1.3. “La mayor parte del trazado cruza por zonas rurales y marginalmente por zonas urbanas del municipio de Soacha,

predominantemente planas con pastizales y zonas arborizadas de baja densidad, y con presencia de algunos cultivos.

6.8.3.1.4. “La UTSRB efectuó el levantamiento topográfico de una línea por el corredor entre el río Tunjuelo y Alicachín por la margen izquierda del río Bogotá, que permitió establecer el perfil del terreno.

#### 6.8.3.2 “Dimensionamiento Hidráulico

##### 6.8.3.2.1 “Caudales de Diseño

6.8.3.2.1.1. “Los caudales de diseño para el dimensionamiento del interceptor Tunjuelo-Canoas-Alachín se obtuvieron del informe población, Caudales y Cargas Contaminantes elaborado por la UTSRB.

6.8.3.2.1.2. “Los caudales que conducirá el Interceptor Tunjuelo-Canoas corresponden a los caudales sanitarios generados por las cuencas del Fucha, Tunjuelo, Tintal y Soacha, cuya magnitud se estableció con el criterio ambiental.

6.8.3.2.1.3. “Tal como se expresa en la referencia<sup>4</sup>, el caudal para lograr la dilución aceptable desde el punto de vista ambiental es el mayor entre 5 veces el caudal medio de agua residual de tiempo seco, y 2 veces la suma del caudal máximo horario y el de infiltración, que se pueden expresar de la siguiente forma:

$$Q_{\text{diseño}} = 2 * (Q_{\text{inf}} + Q_{\text{maxh}}) \text{ ó } 5 * Q_{\text{m agua residual}}$$

6.8.3.2.1.4. “Donde  $Q_{diseño}$  es el caudal de la operación en la condición de diseño del conducto,  $Q_{inf}$  es el caudal de infiltración máximo,  $Q_{maxh}$  es el caudal máximo horario estimado a partir del caudal medio de agua residual y  $Q_m$  *agua residual* es el caudal medio de aguas residuales.

6.8.3.2.1.5. “Posteriormente, en el informe de la referencia<sup>1</sup> se comprobó el beneficio de implementar pondajes tanto en el Interceptor de Fucha-Tunjuelo como en el Tunjuelo Bajo Izquierdo, de manera que se presenta una reducción significativa en las dimensiones de varias estructuras, entre ellas el Interceptor Tunjuelo-Canoas, en virtud de la amortiguación de los picos de caudal, como se aprecia en el cuadro 3.1.

6.8.3.2.1.6. “El criterio planteado para la amortiguación de los pondajes consiste en que éstos deben almacenar únicamente los excesos generados por los eventos lluviosos en la conducción y durante época seca permitir que los caudales sanitarios pasen directamente por una conducción sin que ingresen o inunden el pondaje.

6.8.3.2.1.7. “Se estableció entonces, que el pondaje debe permitir la salida permanente del caudal máximo de agua residual, es decir la suma de agua residual máximo horario y el caudal de infiltración máximo, quedando almacenados temporalmente los volúmenes excedentes considerados como conexiones de aguas lluvias.

6.8.3.2.1.8. “Cuadro 3.1

**Caudales para el Dimensionamiento  
del Interceptor Tunjuelo-Canoas en m<sup>3</sup>/s**

| INTERCEPTOR | Q medio<br>agua | Q infilt | Q medio<br>tiempo | Q medio | Q máximo | Q diseño | Q diseño<br>amortiguado |
|-------------|-----------------|----------|-------------------|---------|----------|----------|-------------------------|
|-------------|-----------------|----------|-------------------|---------|----------|----------|-------------------------|

|                     | residual |     | seco | anual | horario | sin<br>amortiguar |      |
|---------------------|----------|-----|------|-------|---------|-------------------|------|
| Tunjuelo-<br>Canoas | 11.6     | 5.5 | 17.1 | 19.0  | 19.4    | 58.1              | 32.4 |

6.8.3.2.1.8.1. “Es necesario indicar que los caudales de diseño del cuadro 3.1 corresponden al horizonte de saturación, que es ligeramente mayor que el del año 2020, por lo que no es atractivo un desarrollo o construcción por etapas.

6.8.3.2.1.8.2. “También es conveniente anotar que algunos aportes de caudal llegan directamente a los interceptores sin que puedan ser amortiguados en los pondajes, por ello, se agregan sus correspondientes caudales ambientales a los que vienen por el interceptor, como sucede con las descargas de la zona de Tintal y de Soacha<sup>1</sup>.

6.8.3.2.1.8.3. “El cuadro 3.1 suministra además los caudales de medio de tiempo seco y medio anual, los cuales se utilizan para determinar el costo de la inversión inicial de la estación elevadora de Canoas y de los gastos variables de la misma.

**6.8.3.3 “Análisis de Alternativas**

6.8.3.3.1. “Desde este punto de vista, las alternativas más económicas son aquellas que tienen su trazado más superficial, denominadas de pendiente baja y media con recolección de la descarga del Colector Ciudad de Cali por medio de una nueva variante o por bombeo al final del trazado original.

6.8.3.3.2. “Las alternativas 2A y 2 de pendiente baja, con bombeo y variante del Colector Ciudad de Cali son las más económicas con 66.4 millones de dólares, le sigue alternativas 3A y 3, de pendiente media con bombeo y variante del Colector con 70.7 millones de dólares. Luego se

encuentra la alternativa 1, de pendiente baja con 86.8 millones de dólares y por último la 4, de pendiente alta con 93.7 millones de dólares.

6.8.3.3.3. “Para seleccionar entre las 6 alternativas, es necesario considerar el aspecto constructivo, que tiene uno de sus principales condicionantes en las características geotécnicas del subsuelo. En efecto, el perfil típico adoptado presenta un estrato areno-limo-arcilloso, que en general aparece a los 5 m de profundidad, susceptible de contener agua, cuya contención y manejo del agua a ese nivel durante la excavación son exigentes y costosas.

6.8.3.3.4. “Bajo este criterio, tanto la alternativa 1 de pendiente baja como la alternativa 4 de pendiente alta, a pesar de que drenan por gravedad el Colector Ciudad de Cali resultan muy costosas, puesto que requieren excavaciones entre 9 y 10 m promedio, respectivamente y requieren de procesos constructivos mas complejos que las demás, por ello se descartan.

6.8.3.3.5. “Desde el mismo punto de vista, indudablemente las alternativas más superficiales, 2 y 2A, ofrecen menos dificultad e incertidumbre, en razón de la menor profundidad de excavación, 5.70 m en promedio, respecto a los 6.60 m en promedio de las alternativas de pendiente media, 3 y 3A; estas últimas además tiene mayor costo, por ello se descartan.

6.8.3.3.6. “Así las cosas, las alternativas 2 y 2A de pendiente media y trazado superficial, aparecen como las más atractivas. Es necesario indicar que las obras del Interceptor Tunjuelo-Canoas son idénticas en los dos casos y las diferencias se encuentran en las obras complementarias como son la variante o el bombeo del Colector Ciudad de Cali, las cuales presentan algunas características particulares que se deben tener en cuenta para su selección.

#### 6.8.4. “ALTERNATIVAS DEL INTERCEPTOR TUNJUELO-CANOAS

##### **6.8.4.1. Planteamiento De Alternativas**

6.8.4.1.1. “Bajo estas condiciones, las alternativas están orientadas a conservar la geometría en forma de box culvert y eventualmente a cambiarla si se puede utilizar pendientes mayores, para reducir dimensiones y por lo tanto los costos.

6.8.4.1.2. “Así las cosas, el planteamiento de alternativas que se presenta en este documento, obedece básicamente a la posibilidad de eliminar la restricción que impone el Colector Ciudad de Cali para que el Interceptor Tunjuelo-Canoas se pueda trazar mas superficialmente y de esta manera, tener menores excavaciones y rigidez en los muros y placas del box culvert del interceptor.

6.8.4.1.3. “Lo anterior, obliga a bombear la descarga proyectada a dicho Colector al interceptor Tunjuelo-Canoas o a replantear el trazado del colector para llevarlo directamente a descargar en la Estación Elevadora de Tunjuelo o directamente en el Interceptor Tunjuelo Bajo Izquierdo.

6.8.4.1.4. “El diseño de la Estación Elevadora de Tunjuelo tiene su fondo en la cota 2524.51 msnm y un nivel de descarga a la cota 2542.57 msnm correspondiente al nivel de la creciente de 100 años en el río Bogotá. Para llegar a esta cota, la estación requiere dos niveles, de manera que la descarga del primer nivel se efectúa a la cota 2534.77 msnm, lo cual es compatible con la cota de batea 2532.63 msnm, al inicio del interceptor Tunjuelo-Canoas en la alternativa seleccionada por la UTSRB.

6.8.4.1.5. “Por otra parte, la estación elevadora de Canoas tiene su cota de fondo coincidiendo con la solera del final del Interceptor Tunjuelo-Canoas y su descarga se proyecta a la cota 2541.42 msnm más 4.0 m para considerar el paso por el tratamiento secundario de la PTAR de Canoas, antes de ingresar al Emisario Canoas-Alcachín.

6.8.4.1.6. “El nivel 2541.42 msnm referido obedece a que es más conveniente desde el punto de vista operativo dejarlo mas superficial para garantizar el drenaje en condiciones críticas. Para ello, la entrega del Emisario tiene su batea en la 2537.64 msnm, 2567.50 msnm del sistema EAAB, cota mínima de operación de la Estación de Bombeo de Alicachín.

6.8.4.1.7. “Occidente –oriente, como se aprecia en el plano 2, que sin embargo no hace parte de las evaluaciones de este informe, en razón de que este sería un colector secundario.

6.8.4.1.8. “Esta variante del Colector Ciudad de Cali permite tener más superficial el interceptor Tunjuelo-Canoas, de manera que al inicio el recubrimiento puede ser de aproximadamente un metro, generando una excavación promedio de 5.70 m, 3.30 m menos que en la alternativa 1, aunque se conservan las características geométricas y de pendiente de ésta.

6.8.4.1.9. “Los principales efectos de esta modificación en el Interceptor están en la reducción de excavación, rellenos, ancho del corredor, rigidez de la estructura de concreto y la altura dinámica de la estación Elevadora de Canoas.

6.8.4.1.10. “Nuevamente, desde el punto de vista constructivo, la variante del Colector Ciudad de Cali presenta alguna incertidumbre por la profundidad de excavación de 6.50 m en promedio que se requiere

para instalar la tubería. En este trazado se desconoce el perfil del subsuelo y para la estimación de costos se adoptó el mismo perfil del Interceptor Tunjuelo-Canoas, así como las recomendaciones constructivas. Sin embargo, el trazado actual del colector también presenta profundidades similares, con características geotécnicas parecidas.

6.8.4.1.11. “Bajo el criterio constructivo, la estación elevadora parece más simple por ser una obra puntual y relativamente pequeña con excavaciones que alcanzan los 5 m de profundidad aproximadamente.

6.8.4.1.12. “Por otra parte, desde el punto de vista operativo la variante de Colector tiene la gran ventaja de funcionar por gravedad y sólo requiere del mantenimiento eventual, típico de un alcantarillado, mientras que la estación elevadora presenta la incertidumbre típica de estas estructuras como son el mantenimiento y operación del componente electromecánico, que garanticen el bombeo de las aguas residuales permanentemente.

6.8.4.1.13. “La variante del colector presenta otra ventaja en relación con el cubrimiento del servicio, ya que quedaría habilitado en cuanto se construya el Interceptor Tunjuelo Bajo Izquierdo, ITBI, esto es en el año 2006. Si la descarga se efectúa por bombeo en el Interceptor Tunjuelo-Canoas, sólo se podrá conectar a éste hasta que se construya en el año 2009. Además, al conectarse al Interceptor Tunjuelo Bajo Izquierdo se logra un beneficio adicional, pues el pico de caudal del Colector Ciudad de Cali puede ser amortiguado en el pondaje propuesto antes de la estación Elevadora de Tunjuelo.

6.8.4.1.14. “Por razones operativas y de oportunidad en el cubrimiento del servicio se selecciona la alternativa 2 de baja pendiente con variante del Colector Ciudad de Cali.

6.8.4.1.15. “El caudal que se incorporaría al interceptor Tunjuelo Bajo Izquierdo por esta entrega es  $1.07 \text{ m}^3/\text{s}$ , que corresponde al caudal de diseño ambiental, es decir que antes de llegar al pondaje la capacidad del ITBI debe ser de  $23.7 \text{ m}^3/\text{s}$ , el cual luego de ser amortiguado según los criterios indicados en la referencia<sup>6</sup>, llegaría a la estación elevadora con un caudal máximo de  $13.1 \text{ m}^3/\text{s}$ .

#### 6.8.5. “CONCLUSIONES Y RECOMENDACIONES

6.8.5.1. “El costo de la inversión inicial de la alternativa seleccionada es de 66.4 millones de dólares, discriminados en 45.5 millones del Interceptor Tunjuelo-Canoas, 0.3 millones de la Variante del Colector Ciudad de Cali y 20.6 millones de la inversión inicial de la Estación Elevadora de Canoas, cuyos costos variables se estiman en 47.9 millones de dólares.

6.8.5.2. Las características del Interceptor Tunjuelo-Canoas correspondientes a la alternativa seleccionada muestran una sección transversal en forma de cajón de concreto, box culvert, de dos celdas con una base de 4.25 m por 3.30 m de altura, con una longitud de 8.6 Km. hasta el sitio definido preliminarmente para la Estación Elevadora de Canoas.

6.8.5.3. El recubrimiento inicial del interceptor es 1.0 m aproximadamente y en la entrega a la Estación Elevadora es 3.0 m, con una profundidad promedio de excavación de 5.70 m. esta condición de recubrimiento relativamente bajo, impone una restricción para el paso interceptor por debajo del río Bogotá si se quiere localizar en la margen derecha la Estación Elevadora y las instalaciones de la PTAR de Canoas, lo cual implicaría volverlo a cruzar para entregar a la estación de bombeo de Alicachín en la margen izquierda, para evitar la descarga directa al río.

6.9. DEL DISTRITO DE RIEGO LA RAMADA Y DEL DRAGADO DEL RÍO BOGOTÁ (ver cuaderno Programa de Saneamiento del Río Bogotá, Definición de la Alternativa a Seguir, Versión 01, Unión Temporal Saneamiento Río Bogotá, julio 2003.

6.9.1. *Del Distrito De Riego De La Ramada* “La Etapa del distrito de riego y drenaje de la Ramada, fue ideada en el año de 1926, por el entonces Ministerio de Minas y Economía; posteriormente la Caja Agraria colaboró con su mejoramiento. Años más tarde, el manejo de este proyecto pasó a Electroaguas y en la actualidad se encuentra a cargo de la Corporación Autónoma Regional de Cundinamarca. La captación inicial para esta etapa, se localizó en el Municipio de Funza, aguas abajo del sitio de la desembocadura del Río Juan Amarillo en el Río Bogotá. El Río Juan Amarillo es uno de los principales colectores de las aguas servidas de la ciudad de Bogotá; por lo tanto el agua bombeada al sistema, era de baja calidad y alta salinidad a lo que se le suman las limitaciones en el drenaje de los suelos. A través de una serie de estudios, se logró determinar que el punto de captación debería localizarse aguas arriba del Río Juan Amarillo, a la altura del Municipio de Cota, en la vereda Parcelas de Cota, en el sector donde desemboca el río Chicú al Río Bogotá.

6.9.1.1. “La Ramada se sirve de cuatro sistemas para su funcionamiento:

- Punto de captación y estación de bombeo El Chicú: El distrito capta sus aguas del río Bogotá a la altura de la desembocadura del río Chicú, por medio de la estación de bombeo El Chicú, la cual consta de cuatro bombas tipo tornillo, cada una con capacidad de  $1.4 \text{ m}^3/\text{s}$  para un total de  $5.6 \text{ m}^3/\text{s}$ , los cuales se distribuyen de la siguiente manera:  $3.1 \text{ m}^3/\text{s}$  para irrigar la Etapa Actual y I de la ampliación y el Sector

Bojacá – La Herrera; los restantes 2.5 m<sup>3</sup>/s, para irrigar las etapas II a V de la ampliación. La garantía para obtener la oferta requerida de los caudales mencionados se logra con la regulación de los embalses Sisga, Neusa y Tominé.

- Sistema principal de conducción, almacenamiento y distribución de aguas de riego: Corresponde básicamente a la interconexión de las ciénagas existentes (La Florida, Guali- Tres Esquinas, La Isla, Galicia, El Laurel y la Laguna de la Herrera) como eje básico, mediante canales de conducción alimentados a partir de la estación de bombeo El Chicú. Los canales de conducción, además de alimentar las ciénagas y la laguna La Herrera, abastecen de agua para riego las áreas no cubiertas del Distrito.

6.9.1.2. “La operación del sistema de ciénagas en forma escalonada, requiere la construcción de siete (7) estaciones de bombeo, de las cuales se encuentran construidas cuatro (4) y dos (2) diques de cierre para mantener los niveles de los humedales.

- Sistema secundario y terciario del riego: Estos sistemas sirven para la distribución del agua a cada predio; el criterio aplicado para estos sistemas es el de aprovechar al máximo los vallados y demás infraestructuras existentes, incorporándolos al proyecto, con las reformas necesarias.
- Sistema de drenaje: Este sistema se sirve básicamente de los canales existentes para riego y de la estación de bombeo El Tabaco, para conducir las aguas de exceso y lluvias nuevamente al río Bogotá.

6.9.1.3. En cuanto a la disponibilidad de caudales para suplir las necesidades hídricas del Distrito de Riego, se tiene en cuenta el análisis

de caudales realizados para la Estación al Virgen. Como se mencionó anteriormente, en los últimos 10 años en épocas secas los caudales disminuyeron hasta  $2.0\text{m}^3/\text{s}$ , y los requerimientos actuales en el Distrito de la Ramada son del orden de  $3\text{m}^3/\text{s}$  y con el sistema de ampliación serían  $5.6\text{m}^3/\text{s}$ , **por consiguiente existiría un déficit de agua para conservar los usos y los aportes del efluente de la planta “El Salitre” serían fundamentales** (La negrilla es de la Sala).

#### **6.9.2. “Comportamiento Hidráulico del Río:**

6.9.2.1. “Para determinar el comportamiento hidráulico del Río con caudales bajos menores a  $8\text{m}^3/\text{s}$  y obtener una aproximación al caudal mínimo base que debe fluir por el río para que se logre la apariencia de un río aceptable en las mejores condiciones hidráulicas, se estudiarán tres escenarios:

6.9.2.1.1. **“a) Estado Actual del Río:** Este escenario corresponde a la geometría y abscisado que representa las condiciones actuales, para el sector Conejera- Alicachín en un tramo de casi 60 Km.

6.9.2.1.2. **“b) Alternativa de Dragado del Río:** Esta alternativa fue contemplada en HIDROESTUDIOS 2000, basada en la opción de Dragado mayor y Relocalización del Jarillón Izquierdo, la cual consistió en profundizar el fondo del río mediante un dragado para el sector Conejera- Alicachín y conservar un ancho mínimo de la base de la sección, con el fin de mitigar el riesgo de inundación del río Bogotá en el tramo Alicachín – Humedal la Conejera.

6.9.2.1.3. **“c) Alternativa de Rectificación del Río:** Esta alternativa fue contemplada en HIDROESTUDIOS en 1985, con el fin de resolver el problema de protección contra las inundaciones en el sector Alicachín – Juan Amarillo. La alternativa comprende secciones transversales de

forma trapezoidal simple con adición de algunos cortes para eliminar meandros y con los cuales se reduce la longitud de recorrido aproximadamente en 10 Km.

6.9.2.2.. “El informe Caudal Sostenible del Río Bogotá presenta los resultados del estudio del comportamiento hidráulico del río Bogotá, simulando sus condiciones bajo cada uno de los escenarios considerados para un rango de caudales crítico.

6.9.2.2.1. “De acuerdo al análisis de disponibilidad de caudales y para todos los escenarios se asumió que en este tramo fluían caudales bajos que variaron entre  $1\text{m}^3/\text{s}$  y  $8\text{m}^3/\text{s}$ , correspondiente al efluente de la Planta de tratamiento de Aguas residuales “El Salitre”.

6.9.2.2.2. “Las modelaciones hidráulicas se llevaron acabo utilizando el modelo HEC-RAS (Versión 3.0.1 Marzo de 2001), el cual es un modelo matemático basado en la solución unidimensional de la ecuación de energía; la evaluación de las pérdidas de energía incluye las pérdidas de fricción, utilizando la ecuación de Manning, y las pérdidas por contracción y expansión mediante la utilización de coeficientes que son multiplicados por la cabeza de velocidad.

6.9.2.3. “En el análisis de estos escenarios se contemplaron tres condiciones de frontera:

- “Compuertas de Alicachín Cerradas, esto es considerar el nivel de control de las compuertas a la costa actual igual a 2569 msnm.
- “Compuertas de Alicachín Cerradas a la cota minima igual a 2567.46 msnm, esto corresponde al nivel de operación de agua frente a la toma en situaciones de bombeo.

- “Sin control en Alicachín, esto es considerar una profundidad crítica en el sitio del vertedero.

“Los parámetros hidráulicos de interés para este estudio fueron: la velocidad media de la sección, la profundidad máxima de la sección, el ancho de la superficie de agua y el tiempo de viaje del agua en la cuenca media.

6.9.2.3.1. “Los resultados de estas simulaciones proporcionaron las curvas de valores de los parámetros mencionados para distintos caudales a o largo de toda la cuenca media del Río Bogotá.

6.9.2.3.2. **“De las corridas del modelo es posible concluir que el comportamiento hidráulico del río en el estado actual y bajo condiciones de caudal bajo, está gobernado por las compuertas de Alicachín, ocasionando remansos de 15 Km para 8 m<sup>3</sup>/s y de 43 Km para 2 m<sup>3</sup>/s. Con el proyecto de dragado, el remanso cubre la totalidad de la cuenca media para todo el rango de caudales mínimo (de 1 a 8 m<sup>3</sup>/s). Conviene recordar que en la actualidad las compuertas de Alicachín tienen su cresta al nivel 2569 msnm.**

6.9.2.3.3. **“Desde el punto de vista hidráulico, las simulaciones realizadas considerando la cresta de las compuertas en las cotas 2569 y el dragado mayor del río con Relocalización del Jarillón izquierdo, cuyo proyecto está considerado dentro de los planes de inversión del ACUEDUCTO, con caudales entre 4 y 6 m<sup>3</sup>/s, se obtiene una velocidad promedio de 0.06 m/s las profundidades oscilan entre 2.7 y 4.3 m aguas arriba y alcanzan los 5 m en el trayecto con remanso. El ancho superficial oscila entre 35 y 57 m a 20 Km aguas arriba de las compuertas y cambia bruscamente a 74 m en el sector del remanso.**

6.9.2.3.4. “Para el mismo escenario pero con la cota de las compuertas en la 2567.5, las velocidades promedio llegan a ser de 0.12m/s, y las profundidades aguas arriba alcanzan a ser de 1 m y se incrementan paulatinamente hasta la zona del remanso donde alcanza 3.6m. Los anchos superficiales van desde 28 a 48 m y en el remanso llegan hasta 52m.

6.9.2.3.5. “Aparentemente, las profundidades y el espejo de aguas son suficientemente para mantener el aspecto del río, sin embargo, las velocidades tan bajas que tiene la corriente con caudales bajos, hace que el comportamiento del río se asemeja al de un embalse, generando alta sedimentación, bajos coeficientes de reaeración y problemas de eutroficación, por lo que no se presentan condiciones de calidad sustancialmente diferentes en función del caudal.

6.9.2.3.6. **“Se puede concluir para los distintos escenarios que con la cota de aguas abajo en los niveles 2569 msnm, se genera un remanso desde Alicachín hacia aguas arriba que hace que las velocidades sean bajas, incluso para el caudal de 8 m<sup>3</sup>/s presentándose velocidades máximas de 0.20 m/s y velocidades promedio entre 0.05 m/s y 0.10 m/s; así mismo, las profundidades oscilan entre 1.5 y 5.1 m y el ancho de la superficie del agua entre 20 y 52 m. Los tiempos de viaje varían entre 6 y 12 días, tiempo más que suficiente para que se consuma todo el oxígeno disuelto que tenga el agua (la negrilla es de la Sala).**

### 6.9.3. “ANÁLISIS HIDROLÓGICOS

#### 6.9.3.1. “Antecedentes

6.9.3.1 .1. “A raíz de las inundaciones ocurridas a principio de diciembre de 1979, la CAR contrató varios estudios cuyo objetivo fue el

de construir unas obras que ofrecieran una mejor protección contra el desbordamiento del río en la frontera occidental de la ciudad. Los estudios fueron realizados por el consultor Jaime Saldarriaga, quien, con base en la información de caudales registrada en las estaciones operadas por la CAR, la EAAB y la EEEB, realizó análisis de los extremos de las series, concluyendo en esta manera los caudales, con un período de retorno de 25 años, que habrían de usarse para el diseño en los diferentes tramos del río, y que se presentan en el Cuadro 3.1.

6.9.3.1.2. “Con base en estos caudales, Gómez Cajiao y Asociados, para el sector Juana Amarillo – Alicachín, e HIDROESTUDIOS para el sector Puente Vargas – Juan Amarillo, determinaron la sección transversal del río. La CAR adelantó en los primeros años de la década de 1980 las obras del sector Alicachín – Juan Amarrillo recomendadas por Gómez Cajiao y Asociados, sin embargo las obras del tramo aguas arriba no fueron adelantadas por la CAR, pero mediciones posteriores indican que algunos de los vecinos del río han sobre elevado los jarillones aún superiores a los recomendados en los estudios adelantados para la CAR.

6.9.3.1.3. “Entre 1983 y 1985, el consorcio HIDROESTUDIOS – BVI, adelantó para la EAAB el llamado Estudio del Río Bogotá, en el cual se revisaron los conceptos de los tres estudios antes mencionados. La revisión se basó en que los registros existentes en las estaciones localizadas a lo largo del río tienen algunas deficiencias originadas en las bajas pendientes y en los remansos que generan las crecientes que llegan por los afluentes y a que las series de caudales no conforman series estacionarias y por lo tanto no son susceptibles de tratamiento estadístico.

6.9.3.1.4. “El consorcio HE – BVI adelantó un estudio detallado de las mayores tormentas registradas y por medio de un modelo lluvia –

escorrentía, generó las crecientes de los afluentes al río Bogotá, las cuales combinó por medio de un modelo de tránsito de crecientes que resuelve simultáneamente las ecuaciones de continuidad y cantidad de movimiento.

#### **6.9.3.2. Metodología de análisis**

6.9.3.2.1. “La determinación de los caudales a utilizarse en los análisis hidráulicos se basó en los resultados de los estudios efectuados por HIDOESTUDISO – BVI en 1985. Debe anotarse que el modelo utilizado en el presente estudio es un modelo de flujo permanente, esto es no permite analizar el tránsito de las crecientes a lo largo del río. Esto no representa limitación alguna a los resultados de los análisis puesto que los niveles son esencialmente en función de los caudales, los cuales se obtienen a partir de la modelación realizada anteriormente por el consorcio HE – BVI.

6.9.3.2.2. “Como se anotó antes, en ese estudio se efectuó un análisis detallado de las mayores tormentas registradas y por medio de un modelo lluvia – escorrentía, se generaron las crecientes de los afluentes al Río Bogotá, las cuales se combinaron por medio de un modelo de tránsito de creciente. El análisis de este estudio permitió definir los caudales para las condiciones de flujo permanente y las curvas de caudal en función del período de retorno para cada uno de los tramos en los cuales se dividió el análisis y que corresponden a los mismo de los estudios anterior, es: Alicachín – Tunjuelo; Tunjuelo – Fucha; Fucha – Juan Amarillo y Juan Amarillo – La Conejera.

6.9.3.2.3. “El estudio mencionado, el cual se conserva en la biblioteca de la Empresa, presenta varias modelaciones, con diferentes condiciones de frontera en el extremo de aguas abajo, esto es en las compuertas de

Alicachin. Se consideraron dos tormentas, una con centro en Torca y otra con centro en la divisoria de las cuencas de Fucha y Salitre conocida como FUSAL. Para esta última tormenta, en dicho estudio hay dos modelaciones, que consisten en considerar el Río Fucha sin el efecto de la laguna de la Magdalena y con el efecto de dicha laguna, que amortigua considerablemente las crecientes de este afluente y por ende, en el Río Bogotá. En estas modelaciones se consideraron como condiciones de frontera los niveles de control en las compuertas de Alicachín y la condición de apertura de la compuertas. Para estas condiciones, se efectuaron modelaciones para períodos de retorno de 10 y 100 años.

6.9.3.2.4. “Para el presente estudio, se utilizarán los caudales correspondientes a la tormenta Torca y a la tormenta FUSAL con y sin amortiguación de la laguna de la Magdalena, considerando en todos los casos apertura rápida de las compuertas de Alicachín y un nivel de control a la cota 2568.00 en las mismas. En el Anexo 2 se presentan, extraídos del informe en referencia, los niveles y caudales calculados en intervalos de media hora resultantes de las modelaciones efectuadas para cada una de las tormentas mencionadas, con períodos de retorno de 10 y 100 años y en las estaciones consideradas como representativas de cada uno de los tramos en los cuales se dividió el análisis. Al respecto es de anotar que para el tramo Conejera – Juan Amarillo se tomó la estación Conejera, para el tramo Juan Amarillo – Fucha se tomó la estación Sai, para el tramo Fucha – Tunjuelo la estación Tintal y para el tramo Tunjuelo – Alicachín, la estación Alicachín. Con respecto al abscisado del río correspondiente al presente estudio, la estación alicachín se encontraría en las compuertas de Alicachín, la estación Tintal estaría localizada aguas arriba de la confluencia del Tunjuelo en el Km 23 + 200, la estación SAI aguas abajo del meandro en el Km 38 + 600, y la estación La Conejera en el Km 59 + 300.

6.9.3.2.5. “De estos resultados, para cada tormenta, período de retorno y tramo se seleccionó el caudal máximo correspondiente a cada caso una vez se desarrolla la creciente, puesto que la rápida apertura de la compuerta genera una inestabilidad en el modelo que ocasionalmente presenta valores mas altos en una fracción de tiempo, valor este que fue descartado por no corresponder a la realidad del fenómeno.

6.9.3.2.6. “De esta manera se determinaron los caudales representativos para los tramos comprendidos entre la Conejera, Juan Amarillo, Fucha, Tunjuelo y Alicachín, para 10 y 100 años de período de retorno.

6.9.3.2.7. “Con base en estos caudales se obtuvieron las crecientes para 5, 25 y 50 años de período de retorno, por medio de una extrapolación y/o interpolación bajo el supuesto que las series siguen la distribución de Gumbel, como lo ilustran las Figuras 3-1. 3-2. 3-3 y 3-4. El caudal correspondiente al período de retorno de 100 años para la tormenta FUSAL sin amortiguación.

6.9.3.2.8. “Los caudales utilizados en las modelaciones hidráulicas en el presente estudio, los cuales se obtuvieron aplicando la metodología antes descrita, con toda la información base de HIDROESTUDIOS S. A. – BVI de 1985, se presentan en el Cuadro 3.2. Ver Cuadro folio 3-4 cuad.

### **6.9.3.3. “Análisis Efectuados**

6.9.3.3.1. “Los análisis efectuados se encaminaron inicialmente a evaluar los siguientes aspectos considerados básicos en el desarrollo del estudio:

- “Evolución del cauce del río.

- “Efectos de la localización de las tormentas FUSAL Y TORCA.
- “Efecto de la operación de las compuertas de Alicachín.

6.9.3.3.2. “Una vez estudiados los aspectos anteriores, se procedió a analizar el funcionamiento hidráulico del río bajo las diversas hipótesis consideradas en desarrollo del estudio. Estos análisis cubrieron los siguientes aspectos:

- “Situación actual.
- “Realce de los jarillones actuales.
- “Efecto de la amortiguación de la Laguna la Magdalena para el Río Fucha.
- “Efecto de la relocalización del jarillón izquierdo a aproximadamente 30m de la orilla del río. La orilla se define a partir del nivel de agua correspondiente al caudal con período de retorno de 5 años, para tormenta FUSAL sin amortiguación.
- “Efecto de la relocalización del jarillón izquierdo y de la amortiguación de la Laguna la Magdalena.
- “Efecto del dragado de la sección del río y relocalización del jarillón.

#### **6.9.3.4. Efecto de la Localización de las Tormentas FUSAL y TORCA.**

6.9.3.4.1. “Para comparar el efecto de estas tormentas en los niveles del Río Bogotá en el sector estudiado, se calcularon los perfiles hidráulicos con los caudales correspondientes a cada una de estas tormentas para un período de 100 años, suponiendo los niveles de agua en Alicachín a la cota 2569. Los resultados se presentan en la Figura 3. 11, en la que se puede observar que la tormenta FUSAL, sin considerar amortiguación por la laguna la Magdalena, produce los niveles mayores a lo largo del río. El hecho de que la tormenta FUSAL produzca mayores niveles de agua en el tramo La Conejera Juan Amarillo que la tormenta localizada en Torca, se debe básicamente a que por la condición subcrítica del flujo tales niveles están controlados por las condiciones hidráulicas prevalecientes aguas abajo del tramo mencionado.

6.9.3.4.2. “Como se anotó antes, el listado de los resultados arrojados por el modelo se incluyen en el Anexo 2 y corresponden a las corridas 1 y 2. Estos resultados indican que en general las velocidades a lo largo del río, aún durante el paso de las crecientes, son bajas. En efecto, las velocidades calculadas en el sector comprendido entre La Conejera y Juan Amarillo son del orden de 0.30 m/s, en el tramo Juan Amarillo Fucha son de unos 0.50 m/s, entre El Fucha y el Tunjuelo llegan en promedio a unos 0.80 m/s y en el tramo entre el Tunjuelo y Alicachín son del orden de 1 m/s.

#### **6.9.3.5. Efecto del Nivel de Control en las Compuertas de Alicachín.**

6.9.3.5.1. “Con el propósito de estimar el efecto de las compuertas de Alicachín en el comportamiento del río, se calcularon los perfiles hidráulicos suponiendo como condición de frontera en dichas compuertas el nivel de agua a la cota 2569 y suponiendo la profundidad crítica en efecto de las compuertas se extiende hasta unos 15 km aguas arriba de

ellas, es decir que esta condición de frontera no afecta el comportamiento del río en los sectores ubicados aguas arriba del Tunjuelo.

#### **6.9.3.6. Situación Actual.**

6.9.3.6.1. “Una vez definidos los aspectos relativos al efecto de las tormentas y de las compuertas de Alicachín, se procedió a estimar la capacidad hidráulica del cauce en las condiciones actuales, para el efecto se calcularon los perfiles hidráulicos para caudales con períodos de recurrencia de 5 y 10 años en las condiciones consideradas como más severas o sea tomando de la tormenta FUSAL sin amortiguación y suponiendo el nivel de agua en Alicachín a la cota 2569. Los resultados, que corresponden a las modelaciones 4 y 5 del Anexo 2, se presentan en la Figura 3.13, en la que puede apreciarse que para el caudal de 5 años, se presentan desbordamientos en algunos sitios mientras que para el de 10 años tales desbordamientos son más notorios. Dada la dificultad para establecer con precisión un determinado período de retorno de desbordamiento, se puede anotar que dicho período se encuentra entre 5 y 10 años.

6.9.3.6.2. “Como se anotó antes, las velocidades del flujo calculadas son bajas. Para los caudales correspondientes a los períodos de retorno analizados, dichas velocidades son menores pero del mismo orden de magnitud de las calculadas en el análisis de las crecientes de FUSAL y Torca.- Estas bajas velocidades fueron corroboradas mediante observaciones de campo en diversos sectores del río.

#### **6.9.3.7. Realce del Jarillón Izquierdo (Margen Oriental).**

6.9.3.7.1. “Para analizar el realce del jarillón se calculó el perfil hidráulico utilizando la creciente de 100 años de período de retorno de la tormenta FUSAL sin amortiguación y suponiendo el nivel de agua en

Alicachín a la cota 2569, que son las condiciones correspondientes a la modelación 2 del Anexo 2, que son las condiciones más críticas actualmente. En la figura 3.14 se presenta el perfil hidráulico y el jarillón proyectado en los distintos tramos de río suponiendo un borde libre de 1 m aproximadamente.

#### *6.9.3.7.2. Efecto de la Relocalización del Jarillón Izquierdo a 30 m de la Orilla.*

6.9.3.7.2.1. “Teniendo en cuenta los riesgos que implica elevar la altura de los jarillones, como una opción se consideró la posibilidad de desplazar el jarillón izquierdo 30 m con el fin de disminuir la altura de los niveles de agua. Como se anotó antes, se define la orilla a partir del punto donde se encuentra el nivel de agua correspondiente al periodo de retorno de 5 años. Para este análisis se utilizó la creciente de período de retorno de 100 años correspondiente a la tormenta FUSAL sin amortiguación y se supuso el nivel de agua en Alicachín a la cota 2569; los resultados corresponden a la modelación 7 del Anexo 2. En la figura 3.17 se pueden observar los perfiles hidráulicos correspondientes a la situación de los jarillones existentes elevados y al jarillón izquierdo desplazado; como se indica en el cuadro incluido en dicha figura, el efecto de desplazar el jarillón es una disminución de los niveles de agua a lo largo del río que varía entre 0.35 m y 0.65 m.

#### **6.9.3.9. Efecto del dragado de la sección del Río y de la relocalización del Jarillón Izquierdo.**

6.9.3.9.1. “En los análisis anteriores se consideraron básicamente el realce y la relocalización del jarillón izquierdo sin afectar la sección del cauce. Dados los resultados obtenidos en dichos análisis, se procedió a estudiar el efecto de profundizar el fondo del río mediante un dragado,

relocalizando el jarillón izquierdo, como se ilustra en las figuras 3.20, 3.21 3.22 y 3.22 A. en las que se presentan las características del dragado propuesto y los resultados obtenidos. Los resultados de estos análisis corresponden a las modelaciones 9 y 10 que se presentan en el anexo 2, en las que se modeló el efecto conjunto de la sección dragada y de la relocalización del jarillón izquierdo.

6.9.3.9.2. “Teniendo en cuenta la configuración topográfica general del cauce en cada uno de los tramos en los cuales se subdividió el análisis, para cada tramo se adoptó una determinada anchura de la sección dragada. Así mismo, con el propósito de evaluar el efecto de dicha anchura, los análisis contemplaron dos opciones de dragado consistentes en que la anchura de la sección en cada tramo varía, entre ambas opciones, en 5 m.

6.9.3.9.3. “En las figuras 3.20 y 3.21 se presenta el perfil general del fondo dragado, correspondiente a las dos opciones de dragado consideradas, el cual proyectó con base en los puntos mas profundos del fondo actual. Siguiendo la tendencia general de las pendientes del cauce, para el dragado se adoptó una pendiente de 6 centímetros por kilómetro (6 X10) para el tramo comprendido entre esta confluencia y las compuertas de Alicachín.

6.9.3.9.4. “En la figura 3.22 se presentan en detalle los esquemas de las secciones transversales típicas de los tramos Conejera - Juan Amarillo, Juan Amarillo - Fucha, Fucha - Tunjuelo y Tunjuelo - Alicachín, correspondientes a la opción de dragado mayor en la que se consideraron las mayores anchuras de dragado. En el tramo La Conejera - Juan Amarillo la anchura de la base de la sección es de 25 m y los taludes supuestos son 2H: 1V, en el tramo Juan Amarillo-Fucha la anchura se aumenta a 30 m con taludes 2H: 1V. Estas anchuras de la base y los taludes de los jarillones se adoptaron teniendo en cuenta aspectos

topográficos, hidraulicos y geotécnicos; estos últimos se analizan en detalle en el próximo capítulo.”

#### 6.9.3.10. “ALTERNATIVA RECOMENDADA.

##### 6.9.3.10.1. Descripción General

6.9.3.10.1.1. “Teniendo en cuenta los resultados de los estudios hidráulicos y geotécnicos, se concluye que, **desde el punto de vista de la elevación de los niveles de agua y los desbordamientos en el río Bogotá, la opción más recomendable es la que se ha denominado dragado mayor.**

6.9.2.10.1.2. “En efecto, la reducción en la elevación de los niveles de agua resultante de esta obra no sólo representa una disminución en la altura requerida de los jarillones, **sino que contribuye a mejorar las condiciones de drenaje del costado occidental de la ciudad, y además disminuye la posibilidad de que presenten desbordamientos por el costado occidental del río.**

6.9.3.10.1.3. “Como se indica esquemáticamente en las secciones transversales que se presentan en la Figura 3.22, **las obras propuestas consisten en el dragado del fondo cuya anchura se aumenta en los diversos tramos a medida que se avanza hacia aguas abajo como se muestra en la figura mencionada. Básicamente se trata de una sección compuesta en la que al dragado del fondo del río sigue un corte con talud 2H: 1V, a partir del cual, a una distancia de 20 m comienza el jarillón propiamente dicho, con un talud 2H:1V. Es de anotar que en el sector Fucha Tunjuelo, con base en los resultados de los estudios anteriores, se ha supuesto un talud 2.5H: 1V. Este es un aspecto que debe verificarse en la etapa de diseño.**

6.9.3.10.1.4. “Siguiendo la tendencia general de las pendientes del cauce, para el dragado se adoptó una pendiente de 6 centímetros por kilómetro (6X10) para el tramo comprendido entre la Conejera y la confluencia del Tunjuelo y de 3.4 centímetros por kilómetro (3.4 X 10) para el tramo comprendido entre esta confluencia y las compuertas de Alicachín.

6.9.3.10.1.5. “Aunque es la mas costosa de las alternativas analizadas, es de recalcar que se estima que, con su construcción no sólo desaparecería la amenaza de inundación que existe actualmente, sino que dada la disminución en la elevación de los niveles de agua en el río que se logra mediante esta obra, se mejoraría considerablemente el sistema de drenaje del costado occidental de la ciudad.

6.9.3.10.1.6. “Considerando lo anterior, se recomienda que el diseño detallado y la construcción de **las obras mencionadas se lleven a cabo a la mayor brevedad posible**. Los diseños deben contemplar los siguientes aspectos:

- Complementación de los trabajos topográficos y geotécnicos llevados a cabo como parte del presente estudio.
- Definición de la localización definitiva de las obras.
- Dimensionamiento geométrico del jarillón con base en análisis geotécnicos detallados.
- Definición de zonas de préstamo y definición de las zonas para la disposición del material dragado. Diseños para la conformación y disposición del material dragado.

- Elaboración de planos de construcción, especificaciones técnicas, cantidades de obra y presupuestos.
- Cronogramas de ejecución de la obra.
- Elaboración de plan de manejo ambiental.

6.9.3.10.1.7. “Con respecto a los diseños, se debe hacer énfasis en los siguientes aspectos:

- Los jarillones se deben extender por los afluentes al Río Bogotá para evitar que se produzcan desbordamientos por las márgenes de dichos afluentes.
- Se debe prestar la debida atención al problema de la disposición del material dragado.
- El Distrito debe llevar a cabo un programa de adquisición de predios y relocalización de viviendas en los sectores que serían afectados por la construcción de las obras y que actualmente se encuentran ocupados.”

#### **6.9.3.10.2. Etapas Constructivas**

6.9.3.10.2.1. “La definición de las etapas de construcción debe estar referenciada a las necesidades actuales y a los desarrollos previstos en el futuro próximo. La temporada de lluvias del último trimestre de 1999 indicó que **existen tres sectores críticos**: la **zona del Tintal** en la cual en la fecha existen desarrollos importantes y en la cual el Gobierno Distrital

adelanta su proyecto bandera de desarrollo urbano dentro del predio El Recreo; **la zona Engativá** en la cual fue necesario relocalizar algunas familias en la reciente temporada de lluvias y la **zona al occidente de Suba**, sector desarrollado y que estuvo bajo una amenaza permanente.

6.9.3.10.2.2. “Las condiciones hidráulicas del río Bogotá, con bajas pendientes garantizan un flujo subcrítico a todo lo largo del río en la sabana de Bogotá. Como tal **el flujo está gobernado por la condición de aguas abajo**, esto es, por el nivel en el extremo inferior del tramo. **Esta Circunstancia obliga a que las obras, en caso de adelantarse por etapas, se deban necesariamente que iniciar por el extremo de aguas abajo, esto es desde las compuertas de Alicachín.**

6.9.3.10.2.3. “Teniendo en cuenta que uno de los sectores críticos, el Tintal, está localizado entre las desembocaduras de los ríos Tunjuelo y Fucha, **el primer tramo de la adecuación por construirse corresponde al sector Alicachín - Fucha.** Con la construcción de este tramo se logrará una mejoría importante en el sector de Engativá pero mucho menor en el sector de Suba”.

6.9.3.10.2.4. “De acuerdo a lo anterior, la construcción de las obras de adecuación debe adelantarse en dos etapas:

- Primera etapa: Sector Alicachín - Fucha
- Segunda etapa: Sector Fucha - la Conejera.

#### 6.9.3.11. CONCLUSIONES GENERALES

6.9.3.11.1. “A Continuación se presentan las conclusiones generales resultantes de los análisis efectuados en este estudio.

- De acuerdo con la comparación de secciones transversales de 1985 y de 1999 localizadas en distintos sectores del río puede concluirse que, en términos generales, el cauce ha permanecido estable.
- **El efecto de las compuertas se extiende hasta unos 15 Km aguas arriba de ellas**, es decir que esta condición de frontera no afecta el comportamiento del río en los sectores ubicados aguas arriba del Tunjuelo.
- El grado de protección de los jarillones actuales corresponde a una creciente con período de retorno comprendido entre 5 y 10 años.
- Si se considera únicamente el realce de los jarillones existentes, se requeriría alturas comprendidas entre 5 m y 6 m.
- El efecto de amortiguación de la laguna de la Magdalena en el río Fucha produce una disminución en los niveles que varía entre 0.3 m y 0.5 m a lo largo del río.
- La relocalización del jarillon izquierdo a 30 m de la orilla produce una reducción de los niveles que varía entre 0.35 m y 0.65 m a lo largo del río. El efecto conjunto de la amortiguación de la laguna de la Magdalena y de la relocalización del jarillon a 30 m de la orilla izquierda reduce los niveles del río consiste en reducir dichos niveles entre 0.6 m y 1.0 m.
- Desde el punto de vista de la elevación de los niveles de agua en el río y altura del jarillón izquierdo, **de las opciones analizadas la más conveniente es la que corresponde al dragado mayor del**

río y la relocalización del jarillón izquierdo. Con dicho dragado se logra una reducción en la elevación de los niveles de agua, y por lo tanto en la altura de los jarillones, que para la creciente de 100 años de período de retorno es el orden de 3 m con respecto a los niveles que se tendrían realizando el jarillón existente y de 2.3 m. Esta reducción en la elevación de los niveles de agua no sólo representa una disminución en la altura requerida de los jarillones, sino que contribuye a mejorar las condiciones de drenaje del costado occidental de la ciudad, y además disminuye la posibilidad de que se presenten desbordamientos por el costado occidental del río, la cual tendría una proyección hasta para una creciente de 50 años de período de retorno” (la negrilla es de la Sala).

6.9.3.11.2. “En resumen las compuertas de Alicachín, controlan el nivel del río en toda la cuenca media y el funcionamiento de caudales bajos no presenta condiciones muy diferentes a la de caudales medios, funcionando el río en todos los casos como un cuerpo de aguas embalsado. Lo anterior lleva a concluir que **en época crítica de verano, los caudales disponibles en el río, considerando los aportes de la PTAR Salitre son suficientes para proveer agua para el distrito de Riego La Ramada y un caudal sostenible en el río entre 3 y 4 m<sup>3</sup>/s, que tiene un comportamiento hidráulico similar al presentado con caudales medios.**

6.9.3.11.3. **“Para la condición de frontera sin compuertas, las velocidades aumentan hasta 0.25 m/s y las profundidades disminuyen sensiblemente hasta el rango de 0.50 a 2.6 m y por consiguiente el ancho superficial. Es importante indicar que esta condición tiene la enorme desventaja de no permitir el bombeo hacia el Embalse del Muña y por lo tanto no se generaría energía en el sistema de generación correspondiente. Dado que la mejora en las características**

hidráulicas se reducen al último tramo, bajo ninguna circunstancia se justifica seguir considerando esta situación.

6.10. DE LAS DIFERENTES PROPUESTAS DE PACTO REGISTRADAS Y APROBADAS POR LAS PARTES.

6.10.1. Propuestas De Pactos Registradas Por Las Industrias

Cuenca Alta:

Sofasa S.A. (fls. 480 a 483 del Cuaderno No. 2 Pactos de Cumplimiento)

| OBRA / PLAN                                                                                                                                                                                                            | CORTO PLAZO<br>(Hasta 5 años) | MEDIANO PLAZO<br>(De 5 a 10 años) | LARGO PLAZO<br>(Desde 10 años) |
|------------------------------------------------------------------------------------------------------------------------------------------------------------------------------------------------------------------------|-------------------------------|-----------------------------------|--------------------------------|
| Planta de Tratamiento de Aguas Residuales (PTAR) <sup>7</sup> - <i>Actualmente en ejecución.</i>                                                                                                                       | X                             |                                   |                                |
| Certificación NTC - ISO 14001/96 y Sistema de Gestión Ambiental (SGA) <sup>8</sup> – <i>Actualmente en ejecución.</i>                                                                                                  | X                             |                                   |                                |
| Para el año de 2004 se cuenta con \$196.664.128, con el fin de adelantar diferentes tareas ambientales, incluido el pago de la Tasa Retributiva.                                                                       | X                             |                                   |                                |
| Capacitar a todo el personal en el manejo adecuado y eficiente de los recursos, a través de diversas actividades para concientizarlos sobre la responsabilidad ambiental como miembros de la empresa y de la sociedad. | X                             |                                   |                                |

<sup>7</sup> Los vertimientos de la sede de chía son de tipo doméstico y están sometidos a un tratamiento en la PTAR a través de un filtro fitopedológico (3rio) y anaerobio (2rio), con descarga al vallado luego de pasar por una cámara de cloración, que permite que los vertimientos cumplan la norma de vertimiento para este tipo de descarga. La PTAR se instaló, debido a la falta de alcantarillado de la zona.

<sup>8</sup> SOFASA S.A. está certificada en norma ISO 14001, Sistema de Gestión Ambiental tanto para la sede de Envigado como para la de Chía, sometido a que el sistema de administración ambiental cumpla los parámetros ICONTEC.

**Empresa Colombiana de Cables - EMCOCABLES S.A.**  
(fls. 2 a 4 del Cuaderno No. 1 Pactos de Cumplimiento)

| OBRA / PLAN                                                                                                                                                                                                                                 | CORTO<br>PLAZO<br>(Hasta 5 años) | MEDIANO<br>PLAZO<br>(De 5 a 10 años) | LARGO<br>PLAZO<br>(Desde 10 años) |
|---------------------------------------------------------------------------------------------------------------------------------------------------------------------------------------------------------------------------------------------|----------------------------------|--------------------------------------|-----------------------------------|
| Poner a disposición de la CAR equipos para monitoreos trimestrales sobre el estado de contaminación del Río.                                                                                                                                | X                                |                                      |                                   |
| Actividades necesarias para la obtención del certificado ISO 1400 sobre medio ambiente.                                                                                                                                                     | X                                |                                      |                                   |
| Conformación de un grupo de trabajo compuesto por el Gerente de Planta y Directores y Jefes de Área, coordinados por el Coordinador Ambiental para la protección del medio ambiente incluyendo capacitación y entrenamiento con el ICONTEC. | X                                |                                      |                                   |
| Planificación ambiental, e implementación del manejo de residuos convencionales y peligrosos con segregación en la fuente, reutilización, tratamiento, y disposición de los mismos.                                                         | X                                |                                      |                                   |
| Conversión de los sistemas de combustión a gas natural con el beneplácito de la CAR, para producir mínimas emanaciones de productos contaminantes del aire.                                                                                 | X                                |                                      |                                   |
| Mejoramiento de las condiciones de la vera del Río Bogotá mediante la reforestación.                                                                                                                                                        | X                                |                                      |                                   |

Alpina Productos Alimenticios S. A. – ALPINA - (fl. 464 del cuaderno No. 1 de Pactos de Cumplimiento).

| OBRA / PLANES                                                                                                                                       | CORTO<br>PLAZO<br>(Hasta 5 años) | MEDIANO<br>PLAZO<br>(De 5 a 10 años) | LARGO<br>PLAZO<br>(Más de 10 años) |
|-----------------------------------------------------------------------------------------------------------------------------------------------------|----------------------------------|--------------------------------------|------------------------------------|
| Adoptará las medidas internas que garanticen un mejor cumplimiento de las normas ambientales, en relación con los vertimientos y posible afectación |                                  |                                      | X                                  |

|                                                                                                                                                                                                                                                                                                      |   |  |  |
|------------------------------------------------------------------------------------------------------------------------------------------------------------------------------------------------------------------------------------------------------------------------------------------------------|---|--|--|
| del río Bogotá.                                                                                                                                                                                                                                                                                      |   |  |  |
| La empresa realizaría obras internas encaminadas a la protección ambiental en materia de aguas residuales en la planta de Sopó, en un proyecto denominado PTAR II – Sopó, el cual se viene implementando desde el 2001 y se proyecta su terminación para diciembre del 2004 ( <b>en ejecución</b> ). | X |  |  |

Peldar S. A.: (fls. 465 del cuaderno No. 1, de Pactos de Cumplimiento)

*“No obstante la excepción de ausencia de legitimidad pasiva propuesta en la contestación de la demanda con el ánimo de contribuir en la solución del problema que se debate en el presente proceso, PELDAR se vincularía a un proyecto de una organización sin ánimo de lucro, como lo es la fundación AL VERDE VIVO ó la CORPORACIÓN AMBIENTAL EMPRESARIAL u otra similar que tenga relación con el Río Bogotá y su descontaminación.”*

Refisal S. A.: (fls. 465 del cuaderno No. 1 de Pactos de Cumplimiento)

*“En primer lugar, la adopción de medidas internas que garanticen un mejor cumplimiento de las normas ambientales, en cuanto a vertimientos y posible afectación del Río Bogotá”.*

*“En segundo lugar, la empresa se vincularía a un proyecto de una organización sin ánimo de lucro, como lo es la fundación Al VERDE VIVO ó la CORPORACIÓN AMBIENTAL EMPRESARIAL u otra similar que tenga relación con el Río Bogotá y su descontaminación.”*

Cervecería Leona S. A. : (fl. 465 del cuaderno No. 1 de Pactos de Cumplimiento)

| OBRA / PLANES                                                                                                                                                                                                    | CORTO<br>PLAZO<br>(Hasta 5 años) | MEDIANO<br>PLAZO<br>(De 5 a 10 años) | LARGO<br>PLAZO<br>(Más de 10 años) |
|------------------------------------------------------------------------------------------------------------------------------------------------------------------------------------------------------------------|----------------------------------|--------------------------------------|------------------------------------|
| Continuar promoviendo las medidas internas ambientales y de saneamiento que garanticen el cumplimiento de las normas legales vigentes respectivas, en cuanto a vertimientos y posible afectación del Río Bogotá. |                                  |                                      | X                                  |
| Presentar un cronograma de implementación de medidas de gestión ambiental bajo la norma ISO 14001.                                                                                                               | X                                |                                      |                                    |
| Continuar vinculados con la CAR y con las organizaciones gubernamentales y no gubernamentales para llevar a cabo programas que permitan llevar a cabo la recuperación de la cuenca del Río Bogotá.               |                                  |                                      | X                                  |

**Papeles y Corrugados ANDINA S.A.**

| OBRA / PLAN                                                                                          | CORTO<br>PLAZO<br>(Hasta 5 años) | MEDIANO<br>PLAZO<br>(De 5 a 10 años) | LARGO<br>PLAZO<br>(Desde 10 años) |
|------------------------------------------------------------------------------------------------------|----------------------------------|--------------------------------------|-----------------------------------|
| Cumplimiento de las normas ambientales.                                                              | X                                |                                      |                                   |
| Sistema de gestión ambiental. Creación del comité de desarrollo de la gestión ambiental e industrial | X                                |                                      |                                   |
| Programa de buenas prácticas de manufacturas                                                         |                                  |                                      |                                   |
| Programa de tratamiento de residuos líquidos y lodos                                                 |                                  |                                      |                                   |
| Programa de manejo de la madre vieja del río.                                                        |                                  |                                      |                                   |

**Cuenca Media:**

**Industrias Spring S.A.** (fls. 635 a 638 del Cuaderno No. 2 Pactos de Cumplimiento). En su escrito contentivo de proyecto de pacto de cumplimiento señala:

*“Como se explicó en la contestación de demanda, mi representada no efectúa vertimientos de agua en la Represa del Muña o al Río Bogotá directamente, sino que para el efecto utiliza el servicio público de acueducto y alcantarillado de Bogotá, toda vez que la fábrica de Industrias Spring S.A. está ubicada en la Avenida de las Américas No. 67 A 28, que como se observa se encuentra dentro del perímetro urbano de Bogotá, y no cerca o en los alrededores de la represa del muña o del Río Bogotá.”*

Cuenca Baja:

Eternit Colombiana S. A.:  
(fls. 464 y 465 del cuaderno No. 1 de Pactos de Cumplimiento)

| OBRA / PLANES                                                                                                                                                                                                                                                                                                    | CORTO<br>PLAZO<br>(Hasta 5 años) | MEDIANO<br>PLAZO<br>(De 5 a 10 años) | LARGO<br>PLAZO<br>(Más de 10 años) |
|------------------------------------------------------------------------------------------------------------------------------------------------------------------------------------------------------------------------------------------------------------------------------------------------------------------|----------------------------------|--------------------------------------|------------------------------------|
| Tomará las medidas internas pertinentes que garanticen un mejor cumplimiento de las normas ambientales, en cuanto a vertimientos y afectación del río Bogotá.                                                                                                                                                    |                                  |                                      | X                                  |
| Continuar manteniendo el tratamiento integral de aguas residuales e industriales para ser usadas en el proceso de fabricación de productos <b>(en ejecución)</b> .                                                                                                                                               |                                  |                                      | X                                  |
| Así mismo, continuará con: <b>a)</b> El mantenimiento de equipos de control de control de contaminación; <b>b)</b> El programa de reciclaje de papel, tratamiento de aguas y programas de fumigación contra zancudos; <b>c)</b> Las mediciones y monitoreos ambientales, como son calidad de agua, del aire y de |                                  |                                      | X                                  |

|                                                                                                     |  |  |  |
|-----------------------------------------------------------------------------------------------------|--|--|--|
| los residuos; <b>d)</b> Finalmente, realizando capacitaciones en materia ambiental a los empleados. |  |  |  |
|-----------------------------------------------------------------------------------------------------|--|--|--|

**Stanton y Cía. S.A.** (fls. 9 a 12 del Cuaderno No. 1 Pactos de Cumplimiento)

| OBRA / PLAN                                                                                                                                                                                | CORTO PLAZO<br>(Hasta 5 años) | MEDIANO PLAZO<br>(De 5 a 10 años) | LARGO PLAZO<br>(Desde 10 años) |
|--------------------------------------------------------------------------------------------------------------------------------------------------------------------------------------------|-------------------------------|-----------------------------------|--------------------------------|
| Continuar aplicando las normas vigentes en materia ambiental.                                                                                                                              | X                             |                                   |                                |
| Revisar cada dos años el Plan de Manejo Ambiental aprobado por la CAR, aplicando tecnologías de protección al medio ambiente.                                                              | X                             |                                   |                                |
| Se compromete a informar periódicamente a las autoridades ambientales sobre el desarrollo y aplicación del Plan de Manejo Ambiental.                                                       | X                             |                                   |                                |
| Pagar las tasas retributivas o cualquier otro gravamen que se genere por el uso de los recursos ambientales.                                                                               | X                             |                                   |                                |
| Buscar que sus actividades industriales se desarrollen dentro de mecanismos y procedimientos que permitan la protección al medio ambiente.                                                 | X                             |                                   |                                |
| Establecer programas institucionales dentro del personal para que adquieran una conciencia de respeto al medio ambiente.                                                                   | X                             |                                   |                                |
| Establecer reconocimientos en favor de los empleados de la empresa que presenten mejoramientos a las actividades de la empresa que produzcan un resultado de protección al medio ambiente. | X                             |                                   |                                |
| Establecer un comité conformado por el Gerente Administrativo, Gerente de Producción, Gerente General y Gerente de Servicios Generales que creará políticas ambientales de la empresa.     | X                             |                                   |                                |
| Establecer como obligación anual de la                                                                                                                                                     |                               |                                   |                                |

|                                                                                                                                                                        |   |  |   |
|------------------------------------------------------------------------------------------------------------------------------------------------------------------------|---|--|---|
| empresa la revisión de los programas ambientales de la compañía.                                                                                                       | X |  |   |
| Establecer por medio de los funcionarios responsables del manejo ambiental, canales de comunicación institucionales con las autoridades ambientales.                   | X |  |   |
| Establecer como obligación del Comité, la revisión anual de los planes y programas para el manejo de situaciones contingentes que puedan causar problemas ambientales. | X |  |   |
| Invertir en actividades de protección al medio ambiente en el área del embalse del Muña o en las riveras en el Río Bogotá en el área de Alicachín. <sup>9</sup>        |   |  | X |
| Realizar anualmente, a partir del año 2004 y hasta el 2013, la siembra de 100 árboles en el lugar que recomiende la autoridad ambiental competente.                    |   |  | X |

Líquido Carbónico Colombiana S. A.  
(fl. 465 del cuaderno No. 1 de Pactos de Cumplimiento)

*“Se debe advertir que a la fecha se encuentra cerrada la planta del Muña, para la producción de CO2, razón por la cual no se están realizando procesos industriales que impliquen contaminación. No obstante lo anterior, la compañía se comprometería a la adopción de medidas internas que garanticen un mejor cumplimiento de las normas ambientales, en cuanto a vertimientos y posible afectación del Río Bogotá.*

*“En segundo lugar, la compañía ha iniciado el proceso de implementación de los sistemas integrados de gestión, que acredita la conformidad a las normas nacionales e internacionales en administración ambiental.”*

<sup>9</sup> La inversión se realizará según recomendación que para el efecto señala la autoridad ambiental competente para el área del Embalse del Muña, una suma de \$20.000.000, que se invertirá en diez cuotas, cada una de \$2.000.000, la primera en el año 2004 y la última en el año 2013.

Grupo Siderúrgico - Diaco: (fl. 466 del cuaderno No. 1 de Pactos de Cumplimiento)

| OBRA / PLANES                                                                                                                                                                                                                   | CORTO<br>PLAZO<br>(Hasta 5 años) | MEDIANO<br>PLAZO<br>(De 5 a 10 años) | LARGO<br>PLAZO<br>(Más de 10 años) |
|---------------------------------------------------------------------------------------------------------------------------------------------------------------------------------------------------------------------------------|----------------------------------|--------------------------------------|------------------------------------|
| Adopción de las medidas internas que garanticen un mejor cumplimiento de las normas ambientales, en cuanto a vertimientos y posible afectación del Río Bogotá.                                                                  |                                  |                                      | X                                  |
| Mejorar diseños de cajas de recolección de los pozos sépticos cuyo costo ascendería a \$4'000.000.oo                                                                                                                            | X                                |                                      |                                    |
| Independizar los vallados de Proalco y Muña mediante la construcción de una caja con cabezal de entrega de los vertimientos de Proalco previa aprobación de la CAR.                                                             | X                                |                                      |                                    |
| Presentar informes anuales de caracterización de vertimientos en la descarga del vallado del Muña al colector general que descarga a la quebrada de Checua, garantizando el cumplimiento de los parámetros exigidos por la CAR. |                                  |                                      | X                                  |

6.8.1.1. APROBACIÓN DE PACTOS DE CUMPLIMIENTO DE LAS INDUSTRIAS

Previo a la aprobación de los proyectos de pacto de cumplimiento presentado por las diferentes industrias demandadas, la Sala estima prudente, tener en cuenta el inventario ambiental de las empresas con vertimientos al río Bogotá, aportado por la CAR en su escrito contentivo de pacto de cumplimiento (Anexo2 de su propuesta de pacto), pues éste

hace una ilustración del cumplimiento de las normas ambientales por parte de éstas, así:

1. “CERVECERÍA LEONA:

- *Tipo de vertimiento: Industrial*
- *Fuente Receptora: Río Bogotá*
- *Actividad: Producción de Cerveza*
- *Municipio: Tocancipá*
- *Expediente: 7862 trámite permisivo*
- *Con Resolución 1504 de 1996, se otorgó permiso de vertimiento*
- *Mediante Resolución No. 65301, de acuerdo con las visitas de seguimiento y control, se actualiza la norma.*
- *Mediante Resolución 653 de 2001, de acuerdo con los resultados de las diversas visitas de seguimiento y control, se actualizó la norma y se otorgó permiso de vertimiento.*
- *Con Resolución No. 239 de 2002, se adiciona el artículo 4 de la resolución No. 653 de 2001, en el sentido de especificar que el término del permiso de vertimiento es de 5 años*

2. “MALTERÍAS DE COLOMBIA S.A.

- *Tipo de vertimiento: Industrial*
- *Fuente receptora: Río Bogotá*
- *Actividad. Elaboración de Malta*
- *Municipio: Tocancipá*
- *Expediente: 1498 Trámite permisivo*
- *Con Resolución 4068 de 1992 se otorgó permiso de vertimientos*
- *Con resolución 1007 de 1998 se otorga permiso de emisiones atmosféricas*
- *Con Auto PDE 1609 de 1998 se fijó norma de vertimientos al río Bogotá y se requirió Plan de Optimización de PTAR para aguas residuales*
- *Mediante Auto 1108 de 2000 se requirió la presentación de informes semestrales de informes semestrales de avance del plan de cumplimiento para optimización de la PTAR*

3. “PAPELES Y MOLINOS

- *Tipo de vertimiento: Industrial*
- *Fuente receptora: Río Bogotá*
- *Actividad: Planta productora de papel con materiales reciclados*
- *Municipio: Sesquilé*

- Expedientes 12250 permisivo con Resolución 2188 de 1996 se otorgó licencia ambiental se fijó norma de vertimientos y se otorgó concesión de aguas del río Bogota
- Se estableció como ronda de protección del río Bogota una franja de 30 metros de zona hidráulica y de preservación ambiental
- Expediente 3031: De acuerdo a los resultados de las visitas de seguimiento y control se inició trámite sancionatorio por el incumplimiento a las obligaciones de la licencia ambiental por:
  - Estar realizando vertimientos sin tratamientos al río Bogotá y el almacenamiento de residuos sólidos en los patios de la fabrica, de manera antitécnica
- Con Resolución 546 de 2001 se impusieron las siguientes medidas preventivas: Suspensión inmediata de vertimientos de aguas residuales al río Bogotá, hasta tanto se dé cumplimiento a la norma y se recupere el meandro llevando a cabo remoción y tratamiento.
- Suspensión inmediata del almacenamiento de residuos sólidos en los patios de la fabrica.

4. “ALPINA S.A.

- Tipo de vertimiento: Industrial
- Fuente receptora: Río Bogota
- Actividad: Planta productora de alimentos lácteos.
- Municipio: Sopo
- Expedientes: 237 Permisivo. Con Acuerdo 058 de 1987 norma de vertimiento de uso agrícola, riego (Argovia)
- Presentación trimestral de análisis de aguas
- Eficiencia de remoción 80-85 %
- El sistema de tratamiento se encuentra en optimización, el permiso definitivo se otorgará al cumplir la norma
- Resolución 6413 de 1991 norma de vertimiento uso agrícola, descarga ocasional río Teusacá
- Resolución 1880 de 1992 modificación de la norma de vertimientos
- Resolución 751 de 1997 se unifican los valores de las normas de vertimiento
- PTAR 2 SOPO (DIC 2001)
- Etapa 1
  - Tratamiento primario granja porcícola
  - Tratamiento anaeróbico secundario
  - Tratamiento de lodos
- Etapa 2
  - Tratamiento aeróbico

- *Sedimentación secundaria*
- *Digestión anaeróbica de lodos*
- *Etapa 3*
- *Tratamiento físico*
- *Cuagulación, floculación, decantación terciaria*
- *Fintración con carbón activado y arena*

5. “EMCOCABLES

- *Tipo de vertimiento: Industrial*
- *Fuente Receptora: Recirculación*
- *Actividad: Planta de productora alambres*
- *Municipio: Cajicá*
- *Expedientes: 5502 Permisivo. Con Resolución 6241 de 1990 se concede permiso de localización y permiso provisional de vertimientos.*
- *Resolución 960 de 1991 prohíbe emisión de descargas residuales domésticas al río Bogotá, se exige manejo de tanques sépticos.*
- *Resolución No. 2999 de 1992 prórroga del permiso de localización.*
- *Auto 805 de 1999 se fija norma de vertimientos*
- *PTAR recirculación de agua de proceso industrial*
  - *Cuagulación*
  - *Floculación*
  - *Filtración*
  - *Osmosis Inversa*
- *Lodos filtro prensa, mezcla con cal, cemento y cenizas, para la elaboración de bloque pavimento*
- *Aguas domésticas*
  - *Lagunas facultativas*
  - *Tiempo de retención 50 días*
  - *Recubiertas con geomenbranas*

6. “PROTEICOL

- *Tipo de vertimiento: Industrial y Doméstico*
- *Ubicación: Perímetro rural*
- *Fuente receptora: Río Bogotá*
- *No.. expediente 1090 – permisivo*
- *Estado del proceso: Requiere permiso vertimientos*
- *Progreso: Se construyó sistema de tratamiento de aguas residuales.*

Una vez analizado el seguimiento desarrollado por parte de la CAR, frente a estas seis industrias, es preciso entrar a determinar si es viable la aprobación de los proyectos de pacto de cumplimiento que presentaron no solo aquellas que ésta autoridad ambiental relaciona, sino también de todas las que se encuentran demandadas en este proceso así:

**Cuenca Alta:**

**Sofasa S.A.**

Esta industria cuenta con una PTAR en la que sus vertimientos son de tipo doméstico y están sometidos a un tratamiento a través de un filtro fitopedológico (3rio) y anaerobio (2rio), con carga al vallado luego de pasar por una cámara de cloración, que permite que los vertimientos cumplan la norma de vertimiento para este tipo de descarga y está certificada en norma ISO 14001, Sistema de Gestión Ambiental.

Por tales razones, y teniendo en cuenta los objetivos trazados en el pacto de cumplimiento la Sala aprobará el proyecto presentado, y designará a la CAR, para que este atento al cumplimiento del mismo

**Empresa Colombiana de Cables - EMCOCABLES S.A.**

“En el referido informe de la CAR se indica la existencia de una PTAR, de recirculación de agua para el proceso industrial, lo que aunado al hecho de que tiene dentro de sus objetivo la consecución de la certificación ISO 14001, permite a la Sala dar su aprobación a lo manifestado en el referido escrito de pacto y de igual manera se ordenará a la CAR, el control periódico sobre ésta industria, con el fin de que dé cumplimiento a lo consignado en dicho pacto.

**Alpina Productos Alimenticios S. A. – ALPINA –**

De igual manera y según lo señalado por la CAR, Alpina S.A., cuenta con la ejecución de la planta de tratamiento de aguas y se propone construir la PTAR II – SOPO, y mejorar su proceso de tratamiento hacia la norma ISO 14001, por lo que también deberá aprobársele su proyecto de pacto, lo cual, de igual manera será sometido al control de la CAR hasta la consecución de dicha obra y la puesta en marcha de sus demás metas.

**Cristalería Peldar S. A.:**

Pese a su lacónica intervención, deberá aprobarse su proyecto de pacto de cumplimiento, advirtiéndosele que será objeto de reiteradas inspecciones por parte de la autoridad ambiental correspondiente para la verificación del cumplimiento de las normas que para el efecto se exigen.

**Refisal S. A.:**

Es necesario proceder en el mismo sentido, pues su proyecto de pacto se limita a la adopción de medidas internas que garanticen un mejor cumplimiento de las normas ambientales, razón por la cual se designará a la CAR, para dicho control.

**Cervecería Leona S. A. :**

De acuerdo con el seguimiento y control realizado por la CAR, y comprobado por la Magistrada Sustanciadora con el equipo de técnicos y de los apoderados que la acompañaron en su visita a varias industrias de

la cuenca alta, algunas de las cuales fue asistida por los técnicos de la CAR, ésta industria cuenta con los permisos de vertimientos, cumpliendo con lo establecido en la norma, y se orienta hacia la calificación ISO14001, su proceso de uso del agua lo realiza vertiéndolas aguas más arriba del RÍO BOGOTÁ, del lugar donde la toma para su proceso de producción, hecho que determina la aprobación del proyecto de pacto presentado, pues se ha mantenido un constante control sobre ella. Sin embargo, este proceder no puede ser óbice para que no se siga manteniendo una periódica inspección de sus labores ambientales hacia la optimización de las metas normativas ambientales.

**Papeles y Corrugados S.A. (antes Papeles y Molinos):**

Respecto esta industria, la Sala estima necesario aprobar el pacto que presenta, del cual, también la CAR deberá continuar ejerciendo el correspondiente control en cuanto actualmente se encuentra vertiendo sin tratar sus aguas, causando un gran impacto ambiental en el RÍO BOGOTÁ, a consecuencia de los metales que utiliza en su proceso de producción.

**Cuenca Media:**

**Sociedad Industrias SPRING S.A.:**

En el escrito de pacto, recalcó que su sede se encuentra dentro del perímetro urbano del Distrito Capital, hecho que le impide verter sus aguas directamente en la REPRESA DEL MUÑA, por lo cual y aunque exista caracterización de sus aguas y el correspondiente pago de la Tasa retributiva su proceso de producción debe estar dirigido hacia la

optimización de los vertimientos residuales a las fuentes hídricas aunque lo realice de manera indirecta por el alcantarillado, por lo cual EL DAMA tendrá a su cargo el monitoreo y control de sus vertimientos.

**Cuenca Baja:**

**Eternit Colombiana S. A. y, Stanton y Cía. S.A.**

Por otra parte y en relación con los demás pactos de cumplimiento presentados por algunas de las industrias, la Sala debe señalar que a STANTON Y CIA S.A., COMPAÑÍA NACIONAL DE VIDRIOS S.A. CONALVIDRIOS y ETERNIT, S.A , la Magistrada Sustanciadora con la visita que practicó a estas industrias comprobó que están tratando sus aguas residuales, en el caso de ETERNIT las está recirculando para el proceso productivo y el objetivo de todas es hacia el cumplimiento de las Normas ISO 14001, por lo cual se les aprobará a su vez su pacto de cumplimiento, dejando claro con respecto a las dos primeras que deben buscar alternativas para el proceso de recirculación de las aguas que utiliza en el proceso productivo con el fin de reducir el consumo de las aguas subterráneas. En consecuencia, se ordenará a la CAR para que continúe con la vigilancia e inspección del desarrollo de los objetivos trazados en sus documentos de pacto, como lo dispuesto en esta sentencia.

**Líquido Carbónico Colombiana S. A.**

Indica esta empresa, que se comprometerá a la adopción de medidas internas que garanticen un mejor cumplimiento de las normas ambientales, en cuanto a vertimientos y posible afectación del Río Bogotá, por lo que estará bajo control por parte de la CAR.

**Grupo Siderúrgico - Diaco:**

Será igualmente objeto de inspección control y vigilancia por parte de la autoridad ambiental CAR, respecto de las metas propuestas para optimar sus procesos de producción atendiendo a las normas ambientales.

De otro lado, en lo que se refiere a las empresas correspondientes a MALTERIAS y PROTEICOL, quienes si bien no registraron proyecto de pacto, se dispondrá que la CAR, continúe con su función de vigilancia y control frente a estas dos industrias, teniendo en cuenta que en el referido informe indica que venían cumpliendo las órdenes impartidas por esta entidad, como también respecto de CONALVIDRIOS S.A. a la que la Magistrada Sustanciadora visitó comprobando su proceso de producción mediante el tratamiento de sus aguas residuales y el proceso de recirculación una vez tratadas, industrias que en todo caso deberán conducir su proceso hacia la meta de la norma ISO 14001, por lo que tal autoridad ambiental deberá continuar con el respectivo control.

Debe acotarse que la CAR deberá implementar, especialmente, una fuerte inspección de las empresas que no poseen planta de tratamiento, pues estas deberán someterse a la búsqueda e implementación del Certificado ISO 14001, objetivo que no podrá superar los tres (3) años de límite para alcanzarlo.

6.10.2. PROPUESTAS DE PACTO REGISTRADAS POR LOS MUNICIPIOS

Cuenca Alta:

**Municipio de Villapinzón:** (fls. 256 a 270 del Cuaderno No. 1 Pactos de Cumplimiento)

| OBRA / PLANES | CORTO PLAZO | MEDIANO PLAZO | LARGO PLAZO |
|---------------|-------------|---------------|-------------|
|---------------|-------------|---------------|-------------|

|                                                                                                                                                                                                                                                                                                                            | (Hasta 5 años) | (De 5 a 10 años) | (Más de 10 años) |
|----------------------------------------------------------------------------------------------------------------------------------------------------------------------------------------------------------------------------------------------------------------------------------------------------------------------------|----------------|------------------|------------------|
| Construcción del matadero municipal                                                                                                                                                                                                                                                                                        | X              |                  |                  |
| Saneamiento básico                                                                                                                                                                                                                                                                                                         | X              |                  |                  |
| Mantenimiento alcantarillado municipal                                                                                                                                                                                                                                                                                     | X              |                  |                  |
| Mantenimiento relleno sanitario.                                                                                                                                                                                                                                                                                           | X              |                  |                  |
| “Radicación del proyecto de adquisición de predio, diseño y construcción de la planta de tratamiento, colectores y emisario final de aguas residuales para el Municipio de Villapinzón presentado ante la Gobernación de Cundinamarca y la Corporación Autónoma Regional CAR, a fecha 15 de julio de 2003 <sup>10</sup> .” | X              |                  |                  |

**Municipio de Chocontá:** (fls. 272-273 cuaderno No. 1 de Pacto de Cumplimiento)

| OBRA / PLANES                                                            | CORTO PLAZO<br>(Hasta 5 años) | MEDIANO PLAZO<br>(De 5 a 10 años) | LARGO PLAZO<br>(Más de 10 años) |
|--------------------------------------------------------------------------|-------------------------------|-----------------------------------|---------------------------------|
| Construcción, Ampliación y Mantenimiento de Alcantarillado <sup>11</sup> | X                             |                                   |                                 |
| Compra de lotes y conservación de microcuencas.                          | X                             |                                   |                                 |
| Saneamiento básico, unidades sanitarias.                                 | X                             |                                   |                                 |
| Construcción, mantenimiento del matadero municipal.                      | X                             |                                   |                                 |

<sup>10</sup> (Fiel texto),. “en lo que a costos de una planta de tratamiento de los vertimientos de las curtiembres se refiere, no se cuenta con proyecto que permita establecer a la fecha el valor de la inversión, NO OBSTANTE, EN LO QUE AL MUNICIPIO SE REFIERE, DEBE OBSERVARSE QUE EL MUNICIPIO NO CUENTA CON RECURSOS QUE PERMITAN SOSTENER LA PLANTA, POR TANTO EL PROYECTO QUE SE PUDIERA AVALAR POR PARTE DE LA ENTIDAD, TENDRÍA QUE ADVERTIR DICHA CIRCUSNTANCIA.

<sup>11</sup> Comprende: Gastos de administración y operacionales del alcantarillado

|                                               |   |  |  |
|-----------------------------------------------|---|--|--|
| Producción limpia en las curtiembres.         | X |  |  |
| Construcción segunda fase matadero municipal. | X |  |  |
| Planta de Bombeo Sector norte del Municipio.  | X |  |  |

Municipio de Suesca:

| OBRA / PLANES                                               | CORTO<br>PLAZO<br>(Hasta 5 años) | MEDIANO<br>PLAZO<br>(De 5 a 10 años) | LARGO<br>PLAZO<br>(Más de 10 años) |
|-------------------------------------------------------------|----------------------------------|--------------------------------------|------------------------------------|
| Planta de tratamiento en el centro Poblado de Santa Rosita. | X                                |                                      |                                    |
| Tercera Etapa de Alcantarillado.                            | X                                |                                      |                                    |
| Terminación Alcantarillado Centro Poblado de Cacicazgo.     | X                                |                                      |                                    |
| Adecuación del Matadero.                                    | X                                |                                      |                                    |
| Planta de Tratamiento.                                      |                                  | X                                    |                                    |

Municipio de Gachancipá (Cuaderno anexo, Pactos de Cumplimiento)

| OBRA / PLANES                                                                                                                             | CORTO<br>PLAZO<br>(Hasta 5 años) | MEDIANO<br>PLAZO<br>(De 5 a 10 años) | LARGO<br>PLAZO<br>(Más de 10 años) |
|-------------------------------------------------------------------------------------------------------------------------------------------|----------------------------------|--------------------------------------|------------------------------------|
| Reforestación de la cuenca alta del Río Bogotá en el sector correspondiente al Municipio de Gachancipá, Departamento de Cundinamarca.     | X                                |                                      |                                    |
| Implementación Granja Demostrativa Integral Autosuficiente con Producción Orgánica en la vereda roble centro del Municipio de Gachancipá. | X                                |                                      |                                    |
| Programa de Reforestación de la Ronda                                                                                                     |                                  |                                      |                                    |

|                                                                                                                                                                                                                                     |   |  |  |
|-------------------------------------------------------------------------------------------------------------------------------------------------------------------------------------------------------------------------------------|---|--|--|
| de la Quebrada “Quindingua” que desemboca en el Río Bogotá.                                                                                                                                                                         | X |  |  |
| Implementación del vivero participativo para la producción de especies nativas como destinación forestal y de seguridad alimentaria en la vereda “San Bartolomé” en el municipio de Gachancipá.                                     | X |  |  |
| Integrar a los productores agropecuarios del Municipio de Gachancipá, al proyecto de conservación de agua y suelo en la zona Andina de Colombia “Procas” como tecnología sostenible y competitiva del recurso tierra. <sup>12</sup> | X |  |  |
| Programa Integral de Transferencia de Tecnología para la producción limpia y comercialización de hortalizas en la Sabana de Bogotá.                                                                                                 | X |  |  |
| La política ambiental del Municipio en el Plan de Ordenamiento Territorial <sup>13</sup> .                                                                                                                                          | X |  |  |
| Política de los Ecosistemas Estratégicos <sup>14</sup> .                                                                                                                                                                            | X |  |  |
| Política de Evaluación Seguimiento y Control <sup>15</sup> .                                                                                                                                                                        | X |  |  |
| Políticas de Saneamiento Básico y de Servicios Públicos en el Plan de Ordenamiento Territorial .                                                                                                                                    | X |  |  |
| Vertimiento de Aguas Servidas.                                                                                                                                                                                                      | X |  |  |
| Ampliación de la Cobertura y Mejoramiento del Servicio de Alcantarillado.                                                                                                                                                           | X |  |  |

<sup>12</sup> El objetivo de este proyecto es la utilización de maquinaria agrícola adecuada que evite el deterioro del suelo, especialmente en las zonas altas, con el propósito de evitar las escorrentías y la sedimentación de los afluentes al Río Bogotá.

<sup>13</sup> Incluye la política para el saneamiento ambiental mediante el control de la recolección de basuras tanto en la zona urbana como en la rural, la disposición final de residuos líquidos, sólidos, la reglamentación, apoyo y orientación a los procesos de manejo, almacenamiento y transformación de materiales de reciclaje y el tratamiento de aguas residuales, que deben ser incluídas en la recuperación de la Cuenca Alta del Río Bogotá.

<sup>14</sup> El POT se propone preservar las zonas de importancia ecológica, mediante el desarrollo de acciones tendientes a la protección, conservación y restauración de los cerros que rodean al Municipio, recuperación de la Cuenca del Río Bogotá, recuperación de zonas de nacederos, humedales, cauces, ríos y quebradas, protección y recuperación de especies nativas.

<sup>15</sup> Busca hacer eficiente la auditoría a los procesos de mejoramiento del entorno, protección de márgenes hídricas y cumplimiento de los planes de restauración y recuperación morfológica.

|                                                                                       |   |  |  |
|---------------------------------------------------------------------------------------|---|--|--|
|                                                                                       |   |  |  |
| Construcción de una Planta de Tratamiento de Aguas Residuales en la vereda Roble Sur. | X |  |  |

**Municipio de Cogua:** (fls. 713-714 cuaderno No. 2 Pacto Cumplimiento)

| OBRA / PLANES                                                                                                                                                           | CORTO PLAZO<br>(Hasta 5 años) | MEDIANO PLAZO<br>(De 5 a 10 años) | LARGO PLAZO<br>(Más de 10 años) |
|-------------------------------------------------------------------------------------------------------------------------------------------------------------------------|-------------------------------|-----------------------------------|---------------------------------|
| Reubicación Matadero                                                                                                                                                    |                               | X                                 |                                 |
| Compra de predios legalización y mejoramiento de las plantas de tratamiento de agua residual de las veredas de Mortiño sector norte y vereda el olivo sector la escuela | X                             |                                   |                                 |
| Compra de predios legalización y mejoramiento de la planta de tratamiento de agua residual de la vereda de Susagua sector la autopista                                  |                               |                                   |                                 |

**Municipio de Tocancipá:** (Cuaderno Anexo, Pacto de cumplimiento)

| OBRA / PLANES                                                                              | CORTO PLAZO<br>(Hasta 5 años) | MEDIANO PLAZO<br>(De 5 a 10 años) | LARGO PLAZO<br>(Más de 10 años) |
|--------------------------------------------------------------------------------------------|-------------------------------|-----------------------------------|---------------------------------|
| Terminación de los Acueductos de las Veredas “las Esmeraldas” y “Canativa” <sup>16</sup> . |                               | X                                 |                                 |
| Estudio del Plan Maestro de Acueducto para el casco urbano y rural.                        | X                             |                                   |                                 |
| Inicio de obras de inversión establecidas en el plan.                                      | X                             |                                   |                                 |

<sup>16</sup> Esta obra contribuirá a liberar las microcuencas de donde se abastecía la población, logrando recuperar la flora, fauna y el recurso hídrico.

|                                                                                                             |   |  |   |
|-------------------------------------------------------------------------------------------------------------|---|--|---|
| Sistema de Tratamiento de Aguas Residuales – Planta de Sacrificio de Ganado.                                | X |  |   |
| Plan de Gestión Integral de Residuos Sólidos <sup>17</sup> .                                                | X |  |   |
| Restauración y recuperación morfológica de una cantera en la provincia Sabana Centro.                       | X |  |   |
| Diagnóstico Ambiental en su segunda etapa Vereda “Canavita”.                                                | X |  |   |
| Adquisición de predios de interés hídrico para consolidar el corredor ambiental.                            | X |  |   |
| Implementar programas de mantenimiento preventivo y correctivo de la infraestructura de saneamiento básico. |   |  | X |
| Diseño y construcción de un sistema de aprovechamiento y tratamiento de los residuos sólidos.               |   |  | X |
| Manejo Integral de los residuos hospitalarios y patógenos.                                                  |   |  | X |

**Municipio de Zipaquirá y Empresa de Acueducto, Alcantarillado y Aseo** (Cuaderno Anexo, Pactos de Cumplimiento):

<sup>17</sup> Comprende campañas de sensibilización y educación acerca del manejo de los residuos sólidos, como la separación en la fuente, rutas de recolección selectiva.

| OBRAS/PLANES                                                                                                                                                                                                                                                                                                     | CORTO<br>PLAZO<br>(Hasta 5 años) | MEDIANO<br>PLAZO<br>(De 5 a 10 años) | LARGO<br>PLAZO<br>(Desde 10 años) |
|------------------------------------------------------------------------------------------------------------------------------------------------------------------------------------------------------------------------------------------------------------------------------------------------------------------|----------------------------------|--------------------------------------|-----------------------------------|
| <b>Aguas residuales</b><br><br>Interceptor Menor – Hospital<br>Interceptor Menor – Villaluz<br>Interceptor Menor – El Prado<br>Interceptor Calle 8 Algarra 3<br>Interceptor Las Villas<br>Interceptor Centro – San Pablo<br>Interceptor Santa Isabel II<br>Interceptor Santa Isabel I<br>Interceptor Barandillas | X                                |                                      |                                   |
| <b>Aguas Residuales</b><br><br>Estación de Bombeo y Línea<br>Impulsión San Miguel<br>Estación de Bombeo y Línea<br>Impulsión Barandillas<br>Interceptor Salinas<br>Estación de Bombeo y Línea de<br>Impulsión Pasoancho<br>Impulsión Santiago Pérez<br>Interceptor Zipalandia<br>Interceptor Portachuelo         |                                  | X                                    |                                   |
| <i>Aguas Lluvias</i><br><br>Colector La Esmeralda San Carlos<br>Integral Salinas<br>Colector Bóveda a Quebrada la<br>Arteza<br>Colector Barandillas<br>Colector Adecuación Quebrada                                                                                                                              |                                  | X                                    |                                   |

**Municipio de Sopó:** (fls. 114-115 cuaderno No. 1 de Pacto de Cumplimiento)

| OBRA / PLANES                                                                                                                                                                                                                                                                                                                                                       | CORTO<br>PLAZO<br>(Hasta 5 años) | MEDIANO<br>PLAZO<br>(De 5 a 10 años) | LARGO<br>PLAZO<br>(Más de 10 años) |
|---------------------------------------------------------------------------------------------------------------------------------------------------------------------------------------------------------------------------------------------------------------------------------------------------------------------------------------------------------------------|----------------------------------|--------------------------------------|------------------------------------|
| Construir y optimizar los sistemas de tratamiento de aguas residuales de acuerdo con el Plan Maestro de Acueducto y Alcantarillado de Aguas Lluvias y Residuales.                                                                                                                                                                                                   | X                                |                                      |                                    |
| Incluir en el Proyecto del Presupuesto a presentarse el 1 de noviembre de 2003 a consideración del Concejo Municipal las partidas presupuétales que permitan apoyo económico y técnico a la empresa de servicios públicos municipales para que esta a su vez reciba y ponga en funcionamiento las plantas de tratamiento de aguas residuales PTAR I y II de la CAR. | X                                |                                      |                                    |
| Mantener la observancia de las zonas de rivera, de ríos y quebradas incluidos el Río Teusacá, en cuanto no se permita construir en ellas <sup>18</sup> .                                                                                                                                                                                                            | X                                |                                      |                                    |
| Presentar a consideración del Concejo Municipal el proyecto de acuerdo por medio del cual se modifique el P.B.O.T., que permita el traslado del centro de faneado y sacrificio a una zona para su explotación.                                                                                                                                                      | X                                |                                      |                                    |
| El municipio esta dispuesto a llegar a un acuerdo con la CAR en relación a la construcción de la nueva planta prevista en el convenio interinstitucional 247 de 2000 para la construcción de la PTAR II, ubicada en el sector Pueblo Viejo.                                                                                                                         |                                  |                                      | X                                  |
| Una vez la CAR haga entrega al municipio de la Planta de tratamiento ya construida, en la cual se reciben las aguas residuales domésticas del casco urbano, zonas suburbanas, del matadero y de las conexiones erradas de aguas lluvias el municipio se compromete a entrar a negociar de forma directa con la CAR.                                                 |                                  | X                                    |                                    |
| El municipio adoptó los planes maestros de alcantarillado de acuerdo con el                                                                                                                                                                                                                                                                                         |                                  |                                      |                                    |

<sup>18</sup> Por intermedio de la Subsecretaria de Desarrollo Agrario y Medio Ambiente incrementar la arborización en un número superior de 2000 árboles.

|                                                                                                                                                                                                                               |   |  |   |
|-------------------------------------------------------------------------------------------------------------------------------------------------------------------------------------------------------------------------------|---|--|---|
| Acuerdo 019 del 16 de octubre de 2003 del Casco Urbano y Zonas Suburbanos de Bellavista, Centro Alto, El Hoyito y los sectores de Briceño, Hato Grande, La Diana, Gratamira, Neusa, Mercenaria y Pueblo Viejo. (en ejecución) |   |  | X |
| Presenta un plan para lograr la descontaminación del Río Bogotá a nivel de las fuentes hídricas.                                                                                                                              | X |  |   |

**Municipio de Chía:** (Cuaderno anexo, Pactos de Cumplimiento)

| OBRA / PLANES                                                                                                                                           | CORTO PLAZO<br>(Hasta 5 años) | MEDIANO PLAZO<br>(De 5 a 10 años) | LARGO PLAZO<br>(Más de 10 años) |
|---------------------------------------------------------------------------------------------------------------------------------------------------------|-------------------------------|-----------------------------------|---------------------------------|
| Plan Maestro de Acueducto <sup>19</sup>                                                                                                                 | X                             |                                   |                                 |
| Planta de Tratamiento de Agua Potable                                                                                                                   | X                             |                                   |                                 |
| Obra - Chilacos: Redes de alcantarillado separadas (aguas negras y aguas lluvias) <sup>20</sup>                                                         | X                             |                                   |                                 |
| Obra - Bojacá: Redes separadas de aguas negras y aguas lluvias que subsanará las necesidades existentes.                                                | X                             |                                   |                                 |
| Obra - Fagua: Completará el faltante de la red de aguas residuales.                                                                                     | X                             |                                   |                                 |
| Construcción Plantas de Tratamiento de Aguas Residuales: El Darién - Cataluña - El Cacique - La Paulina. Recuperación de la PTAR de Chía. <sup>21</sup> |                               |                                   |                                 |

**Municipio de Cota:** (fl. 642 cuaderno No. 2 Pacto Cumplimiento)

<sup>19</sup> Se presentará el diagnóstico técnico del sistema, la simulación de la red matriz, el programa de agua no contabilizada y el programa de expansión. Constará de la descripción del sistema actual, diagnóstico del tratamiento y el plan de expansión de la red de alcantarillado y tratamiento de aguas residuales.

<sup>20</sup> Descongestionará el saturamiento existente en la evacuación de los residuos líquidos de la zona urbana del municipio de Chía.

<sup>21</sup> Se construirán otras plantas cuyo diseño y ubicación dependerán del plan maestro de alcantarillado.

| OBRA / PLANES                                                                     | CORTO<br>PLAZO<br>(Hasta 5 años) | MEDIANO<br>PLAZO<br>(De 5 a 10 años) | LARGO<br>PLAZO<br>(Más de 10 años) |
|-----------------------------------------------------------------------------------|----------------------------------|--------------------------------------|------------------------------------|
| Ampliación de la Cobertura de la Planta de Tratamiento de la Vereda Pueblo Viejo. |                                  | X                                    |                                    |
| Construcción Planta de Tratamiento Vereda “Rozo”.                                 | X                                |                                      |                                    |
| Construcción de dos Plantas de Tratamiento Modulares Vereda Parcelas.             |                                  | X                                    |                                    |

**Cuenca Media**

**Municipio de Madrid:** (fls. 583-586 cuaderno No. 2 Pacto Cumplimiento)

| OBRA / PLANES                                                                                                  | CORTO<br>PLAZO<br>(Hasta 5 años) | MEDIANO<br>PLAZO<br>(De 5 a 10 años) | LARGO<br>PLAZO<br>(Más de 10 años) |
|----------------------------------------------------------------------------------------------------------------|----------------------------------|--------------------------------------|------------------------------------|
| Construcción Planta de Tratamiento de Aguas Residuales sector Pablo VI Puente de Piedra.                       | X                                |                                      |                                    |
| Construcción alcantarillado de Aguas Negras.                                                                   | X                                |                                      |                                    |
| Reforestación del Río Subachoque 24.5 Hectáreas.                                                               | X                                |                                      |                                    |
| Construcción colector principal del Alcantarillado Sanitario Vereda Puente Piedra sector VI.                   | X                                |                                      |                                    |
| Construcción Alcantarillado Aguas Negras Barrios Escallón, Amparito, Echavarría, Lorena y Bolonia al Colector. | X                                |                                      |                                    |
| Construcción Planta de Tratamiento Barrio Echavarría <sup>22</sup> .                                           | X                                |                                      |                                    |
| Construcción Parque Lineal Ecoturismo Río Subachoque.                                                          |                                  | X                                    |                                    |
| Reubicación de familias que se encuentran en la ribera del Río.                                                |                                  |                                      | X                                  |

<sup>22</sup> Pretende tratar aguas aproximadamente de 6.000 personas para posteriormente desembocar al Río Subachoque

|                                                                    |  |  |   |
|--------------------------------------------------------------------|--|--|---|
| Implementación del Plan Maestro de Alcantarillado y Aguas Lluvias. |  |  | X |
|--------------------------------------------------------------------|--|--|---|

**Educación y Control:**

- Promover en el Municipio una cultura y pertenencia hacia nuestra fuente hídrica, a través de talleres, organización del cabildo verde, recorridos turísticos, materia de estudio obligatoria para todas las escuelas y colegios del municipio, organización de grupos ecológicos.
- Hacer efectivo el cobro de las tasas retributivas y/o compensatorias por el uso del agua en el municipio, para su reinversión en la recuperación del río y/o sistema ambiental municipal.
- Promover el funcionamiento adecuado de las plantas de tratamiento y lagunas de oxidación Madrid I y Madrid II, que funcionan en el municipio.
- Establecer acciones coordinadas entre el Municipio de Madrid, los municipios ribereños y la autoridad competente ambiental, para el seguimiento y control a las capacitaciones de agua ilegales por parte de la autoridad ambiental, incluyendo pozo profundos, reservorios, sifones de captación y localización de motobombas de subsucción (sic).
- Seguimiento y control de los planes de manejo ambiental para la explotación y/o recuperación de las canteras que funcionan en el Municipio.
- Conservación del Cerro de Carrasquilla.
- Control de la deforestación a través de la Umata del Municipio

Municipio de Mosquera: (Cuaderno Anexo, Pactos de Cumplimiento)

| OBRA / PLANES                                                                                                                        | CORTO PLAZO<br>(Hasta 5 años) | MEDIANO PLAZO<br>(De 5 a 10 años) | LARGO PLAZO<br>(Más de 10 años) |
|--------------------------------------------------------------------------------------------------------------------------------------|-------------------------------|-----------------------------------|---------------------------------|
| Destaponamiento pozo Siete Trojes <sup>23</sup> .                                                                                    | X                             |                                   |                                 |
| Mejoramiento o nueva construcción de la Planta de Tratamiento Siete Trojes <sup>24</sup> .                                           | X                             |                                   |                                 |
| Construcción de pozo profundo en el sector de los Puentes Vereda Balsillas <sup>25</sup> .                                           | X                             |                                   |                                 |
| Construcción línea de conducción de agua del pozo puentes a las plantas del centro <sup>26</sup> .                                   | X                             |                                   |                                 |
| Ampliación en la capacidad de las plantas de tratamiento del centro.                                                                 | X                             |                                   |                                 |
| Adecuación del laboratorio de aguas.                                                                                                 | X                             |                                   |                                 |
| Construcción y puesta en funcionamiento del Colector Transval <sup>27</sup> .                                                        | X                             |                                   |                                 |
| Construcción alcantarillado de barrios, la cumbre, Altos de Santana, Villa del Rocío, Santana, El Dorado y el Carmen <sup>28</sup> . | X                             |                                   |                                 |
| Construcción y puesta en marcha de la planta de tratamiento de aguas residuales del barrio Porvenir Río <sup>29</sup> .              | X                             |                                   |                                 |
| Reubicación de habitantes del barrio Porvenir Río asentados en la ronda del río Bogotá.                                              | X                             |                                   |                                 |
| Recuperación Ronda Río Bogotá                                                                                                        |                               |                                   | X                               |
| Recuperación Ronda Río Balsillas y Subachoque                                                                                        |                               |                                   | X                               |
| Delimitación Ronda “Ciénaga del Gualí”                                                                                               |                               | X                                 |                                 |
| Delimitación Ronda de la Laguna de la                                                                                                |                               |                                   |                                 |

<sup>23</sup> Pozo construido como condición para la disponibilidad del servicio de acueducto de los proyectos urbanísticos en cercanías a la Vereda Siete Trojes, el cual no ha podido ser explotado por fallas técnicas.

<sup>24</sup> Con el objetivo de potabilizar el agua que se extraiga del pozo Siete Trojes.

<sup>25</sup> Para obtener una fuente de agua propia y no comprar agua en bloque a la E.A.A.B.

<sup>26</sup> Para conducir el agua extraída del pozo puentes hasta las plantas de tratamiento del centro, impulsada mediante una estación de bombeo ubicada en el predio en que se construya el pozo.

<sup>27</sup> Construcción como consecuencia del deficiente sistema de alcantarillado sanitario en su “colector de la tercera”.

<sup>28</sup> Construcción de redes de alcantarillado de aguas lluvias y de redes de alcantarillado de aguas residuales domésticas independientes para tales barrios.

<sup>29</sup> Diseño, construcción y puesta en marcha de la planta de tratamiento de aguas residuales por el sistema de lodos activados de la zona de expansión urbana Planadas, Porvenir Río I y II, Managua y Sabana del Municipio de Mosquera.

|                                                                               |   |   |   |
|-------------------------------------------------------------------------------|---|---|---|
| Herrera.                                                                      |   | X |   |
| Malla Ambiental.                                                              |   | X |   |
| Reserva Forestal.                                                             |   | X |   |
| Recuperación Morfológica.                                                     |   |   | X |
| Estudios y Diseños Plan Maestro Alcantarillado - Aguas residuales domésticas. | X |   |   |
| Separación de la fuente descarga, Maipore, Cartuja Serrezuela - A.R.D.        | X |   |   |

Municipio de Facatativá (Cuaderno anexo, Pactos de Cumplimiento)

| OBRAS / PLANES                                                                                                                                                            | CORTO PLAZO<br>(Hasta 5 años) | MEDIANO PLAZO<br>(De 5 a 10 años) | LARGO PLAZO<br>(Desde 10 años) |
|---------------------------------------------------------------------------------------------------------------------------------------------------------------------------|-------------------------------|-----------------------------------|--------------------------------|
| Construcción del colector que se utiliza para conducir aguas residuales, ubicado en la vereda de San Rafael Bajo.                                                         | X                             |                                   |                                |
| Construcción del colector ubicado en el Barrio Siete de Agosto, utilizado para conducir aguas residuales domésticas con el fin de descontaminar la quebrada de Chapinero. | X                             |                                   |                                |
| Construcción de la Planta de Tratamiento de Aguas Residuales II <sup>30</sup> .                                                                                           |                               | X                                 |                                |

Municipio de Funza: (fls. 103-104 cuaderno No. 1 de Pacto de Cumplimiento)

<sup>30</sup> El fin de esta Planta es recoger las aguas de todos los colectores y completar así la recolección y purificación que no se está realizando a través de la planta PTAR I.

| OBRA / PLANES                                                                                                                                                                                                                                                                                                                                                                                                                                    | CORTO PLAZO<br>(Hasta 5 años) | MEDIANO PLAZO<br>(De 5 a 10 años) | LARGO PLAZO<br>(Más de 10 años) |
|--------------------------------------------------------------------------------------------------------------------------------------------------------------------------------------------------------------------------------------------------------------------------------------------------------------------------------------------------------------------------------------------------------------------------------------------------|-------------------------------|-----------------------------------|---------------------------------|
| Recuperación de las zonas de Ronda del Río Bogotá aprox. 1 km de longitud y 150m de ancho <sup>31</sup> .                                                                                                                                                                                                                                                                                                                                        | X                             |                                   |                                 |
| Cerramientos transparentes en malla aislando éstas zonas <sup>32</sup> .                                                                                                                                                                                                                                                                                                                                                                         | X                             |                                   |                                 |
| Tratamiento correcto de las aguas residuales del Municipio a través de la Planta de Tratamiento.                                                                                                                                                                                                                                                                                                                                                 | X                             |                                   |                                 |
| ampliación y mantenimiento de las fuentes hídricas y forestales recuperando el cuerpo de humedales.                                                                                                                                                                                                                                                                                                                                              | X                             |                                   |                                 |
| Continuar con el proceso de firmar escrituras con los propietarios de los terrenos aledaños a los cuerpos de agua (rondas del humedal del río y del río Bogotá) en casi 40.000 m <sup>2</sup> de zonas de ronda y manejo ambiental como cesión gratuita al municipio para asegurar su control.                                                                                                                                                   | X                             |                                   |                                 |
| Las inversiones proyectadas tanto de la Alcaldía como de la Empresa de Acueducto y Alcantarillado Funza EMAAF E. S. P. para los sectores de acueducto, alcantarillado sanitario y alcantarillado pluvial para los próximos cuatro (4) años por un total de 11.310 millones de pesos, adicionalmente de la inversión de 459 millones de pesos de recursos de la Nación en el mantenimiento, reforestación y conservación del cuerpo de humedales. | X                             |                                   |                                 |
| En cuanto a cobertura de Redes de Alcantarillado Sanitario, la Administración Municipal proyecta a que durante los próximos cuatro años se tendrá una cobertura del 100% del casco Urbano, aguas que serán dirigidas en su totalidad a la PTAR para su tratamiento y final disposición en el cuerpo de humedales.                                                                                                                                | X                             |                                   |                                 |

**Cuenca Baja:**

<sup>31</sup> 50 m de ronda y 100 m de manejo ambiental, procurando su escrituración al municipio  
<sup>32</sup> Canjeando las zonas de cesión obligatorias de proyectos industriales incluidos en el PBOT para ser reemplazadas por las zonas de reserva ambiental

**Municipio de Soacha:** (fls. 303- 304 cuaderno No. 1 de Pacto de Cumplimiento y Cuaderno Anexo)

| OBRA / PLANES                                                                                                                                                                                                                                                         | CORTO PLAZO<br>(Hasta 5 años) | MEDIANO PLAZO<br>(De 5 a 10 años) | LARGO PLAZO<br>(Más de 10 años) |
|-----------------------------------------------------------------------------------------------------------------------------------------------------------------------------------------------------------------------------------------------------------------------|-------------------------------|-----------------------------------|---------------------------------|
| Construcción primera etapa de los interceptores de Aguas Negras de la cuenca Terreros- Tibanica- Bogotá D.C.- Soacha Departamento de Cundinamarca <sup>33</sup> .                                                                                                     |                               | X                                 |                                 |
| Construcción redes matrices de acueducto para a zona sur (El Papiro, San Nicolás, Conviva, Compartir, Ciudadela Latina y Ciudad de Quito) y altos de Cazucá- Zona Intermedia- Soacha- Terrenos <sup>34</sup> .                                                        | X                             |                                   |                                 |
| Construcción, diseño y optimización del sistema de aguas residuales de la planta de sacrificio del Matadero Municipal y construcción de una planta con un tratamiento primario, así como la construcción del estercolero para el tratamiento de los residuos sólidos. | X                             |                                   |                                 |
| Construcción Redes de aguas negras, lluvias, suministro de acueducto y parte proporcional del Convenio general Colector Canoas.                                                                                                                                       | X                             |                                   |                                 |

**Municipio de Sibaté:** (fls. 438 a 440 del cuaderno No. 1 de Pactos de Cumplimiento)

<sup>33</sup> Convenio interadministrativo de apoyo técnico- financiero firmado por el Municipio de Soacha, el Departamento de Cundinamarca y la Empresa de Acueducto y Alcantarillado de Bogotá.  
<sup>34</sup> Convenio interinstitucional de apoyo financiero, firmado por el Municipio de Soacha, Ministerio de Desarrollo Económico, Departamento de Cundinamarca y la Empresa de Acueducto y Alcantarillado de Bogotá.

| OBRA / PLANES                                                                                                                                                                                                                              | CORTO<br>PLAZO<br>(Hasta 5 años) | MEDIANO<br>PLAZO<br>(De 5 a 10 años) | LARGO<br>PLAZO<br>(Más de 10 años) |
|--------------------------------------------------------------------------------------------------------------------------------------------------------------------------------------------------------------------------------------------|----------------------------------|--------------------------------------|------------------------------------|
| Interceptor de Aguas Residuales del área Urbana Central, en desarrollo de los estudios y diseños presentados.                                                                                                                              | X                                |                                      |                                    |
| Abrir un nuevo matadero Municipal que cumpla con las reglamentaciones de tipo sanitario y de uso del suelo mediante el sistema de concesión para que sea construido por el sector privado.                                                 |                                  | X                                    |                                    |
| La administración del Municipio de Sibaté se compromete a verificar lo dispuesto mediante la Resolución No. DRF 193 del 24 de julio del 2000 en relación con los reservorios de agua donde se almacena el agua de riego para los cultivos. | X                                |                                      |                                    |

6.10.2.1. Con relación a las propuestas de pacto de cumplimiento de los Municipios, la Sala les imparte su aprobación bajo la discusión y acuerdo por todas las partes del proceso al exigirles el diseño y ejecución de sus Planes Maestro de Alcantarillado tanto en el sector urbano como en el rural (veredal), de tal manera que todas las aguas residuales de su localidad ingresen a las respectivas Plantas de Tratamiento que en ellos funcionan, sean de su propiedad, ora de la CAR, la cual en su compromiso de pacto, de acuerdo con el reparo que hicieron los alcaldes de no entrarlas a operar hasta tanto no se encontraran en estado de tratar el porcentaje del efluente que en el momento en que sean reparadas esté llegando a las mismas, se dispondrá que una vez que la CAR cumpla con su compromiso y en el término máximo de tres (3) años cual así fue aprobado y aceptado por este ente, cada uno de los municipios deberá proceder a operarlas con los recursos con que cuentan, especialmente los afectos al cobro por “Costo de Operación de tratamiento de aguas residuales ‘CTR’”, reglamentado por la COMISIÓN REGULADORA DE AGUA POTABLE en el artículo 16 de la Resolución CRA 287 DE 25

DE MAYO DE 2004, de acuerdo con lo previsto en la Ley 142 de 1994 dentro de la tarifas de servicio de acueducto y alcantarillado.

6.10.2.2. Igualmente, en aquellos municipios donde las PTRAR que están diseñadas para alcanzar remociones iguales o superiores al 80% de DBO y SST, y en las que su efectividad se ve reducida principalmente debido a que los sistemas de alcantarillado que lleguen a las mismas, por lo cual no cubren la totalidad de las aguas que vierte el municipio, como también en aquellos en los que los caudales de aguas residuales supera la capacidad para tratarlas, por razones, por ejemplo por vertimientos de residuos ruminales que provienen de las plantas de sacrificio de animales, o cuando las curtiembres y las industrias no tratan sus aguas residuales, por lo que se presenta una sobrecarga de las PTAR, deberán con cargo a los recursos que prioritariamente según la ley disponen para saneamiento (del 41% del propósito general -art. 78 Ley 715/2001-, transferencias del sector eléctrico -el art. 45 de la Ley 99-, del 50% de la sobretasa del Impuesto Predial que la CAR les transfiere –parag. 2º, art. 44 Ley 99/93, Ingresos Por Regalías art. 360 C.N- y los que perciben del Fondo Nacional de Regalías –art. 361 idém-) especialmente los acabados de mencionar, quienes deberán proceder a introducirles las reparaciones y demás mejoras que requieran, como también proceder a construir las necesarias para tratar todos sus vertimientos, cual así analizará con mayor detenimiento más adelante. Para tal efecto, en el término de la siguientes vigencia fiscal deberán incluir dentro de sus respectivos Presupuestos dichas obras, en atención a que ya se encuentran incluidos dentro de sus POT y en consideración, se insiste, a la priorización de tales recursos para saneamiento ambiental y dentro este la necesidad básica insatisfecha más relevante es la recuperación de los recursos hídricos.

6.10.2.3. A ese respecto la Ley 812 de 2003 del 26 de junio de 2003, Por la cual se aprobó el Plan Nacional de Desarrollo 2003 – 2006, dentro de sus principales programas de inversión, dentro de los cuales se encuentra

los de “*Seguridad Democrática*”, como otro objetivo el “*Crecimiento Económico Sostenible y Generación de Empleo*”, respecto a la Sostenibilidad Ambiental regula en el numeral 8° del artículo 8, lo siguiente:

“Con el objeto de mantener la base natural como factor para el desarrollo del país, aumentar la producción y oferta de bienes y servicios ambientalmente sanos y la sostenibilidad de la producción nacional, y de contar con un Sistema Nacional Ambiental fortalecido, se adelantarán los siguientes programas:

“(…).

“Manejo Integral del Agua. Se implementarán planes de ordenamiento y manejo integral de microcuencas en cerca de 500.000 hectáreas, incluida la reconversión hacia sistemas productivos sostenibles y el establecimiento de abastecedoras de agua. Se trabajará en la protección especial de páramos y humedales. Se desarrollará una política integral a través de la promulgación de una Ley Marco del agua. Igualmente se implementará el Plan de Manejo de Aguas Residuales y se desarrollará una política integral y la armonización del marco normativo en materia de agua de suma importancia para el país, en especial los ríos Magdalena, Cauca, Bogotá, Atrato, San Juan, Meta, Sinú, San Jorge, Baudó y Patía; y se seguirá con el programa de descontaminación del río Bogotá.

6.10.2.4. Baste la anterior consagración de los postulados normativos del MANEJO INTEGRAL DE CUENCAS, LEY MARCO DEL AGUA, PLAN DE MANEJO DE AGUAS RESIDUALES, para respaldar las órdenes y directrices que en esta sentencia se imparten en cuanto a la acción y ejecución coordinada de todas las obras que los municipios como el Distrito y las demás autoridades involucradas deben emprender, a realizar dentro de un sistema de engranaje, del que si llega a fallar una sola pieza, no es posible que el motor prenda, para el caso la descontaminación del RÍO BOGOTÁ y de sus Afluentes materia de las pretensiones

6.10.2.5. De otra parte, para garantizar el cumplimiento cabal de esta orden y con el fin de preservar el buen funcionamiento de las PTAR, la CAR como autoridad ambiental deberá procurar por reglamentar la operación por conducto de una EMPRESA REGIONAL PARA TODA LA CUENCA DEL TERRITORIO DE SU JURISDICCIÓN, previo el cumplimiento de las reglas y normas de la contratación administrativa.

### 6.10.3. PROPUESTA DE PACTO REGISTRADA POR EL DISTRITO CAPITAL Y POR LA EMPRESA DE ACUEDUCTO Y ALCANTARILLADO

6.10.3.1. **Al presentar sus propuestas comienzan por decir que deben tenerse de presente las acciones de las entidades del Distrito Capital y de la CAR, tendientes a una solución integral del RÍO BOGOTÁ desde la óptica de la CIUDAD REGIÓN, por lo cual se celebró el día 6 de agosto de 2003, un acuerdo entre esas dos entidades en donde se pactan los principios bajo los cuales se soporta el saneamiento del río, firmado para tales efectos entre el Alcalde Mayor de Bogotá, Doctor ANTANAS MOCKUS SIVIKAS y el Director General de la CAR, DARÍO LONDOÑO LONDOÑO.**

6.10.3.2. Se precisa que el proyecto se ha dividido en dos etapas, la primera va hasta el año 2009, que se caracteriza porque las obras de la cuenca media en Bogotá, se encuentran definidas al igual que los recursos disponibles para ejecutarlas, tales como las tarifas del Acueducto, la Ley 715 (30%) y el aporte del Impuesto Predial de Bogotá (7.5%, de acuerdo a la Ley 99/93). Para la cuenca media, se espera tener construido y operando optimizada la PTAR El Salitre y terminados los interceptores de aguas residuales hasta el sector de Alicachín, además de contar con el plan de obras de mitigación de impactos ambientales en el Embalse del Muña.

6.10.3.3. El Distrito Capital aduce que se espera que los municipios de la cuenca alta logren terminar sus coberturas de alcantarillado que garanticen su llegada hasta las PTAR, no obstante, se sabe que este plan se ejecutará a mayor o menor plazo dependiendo de los recursos.

6.10.3.4. Continúan diciendo que la segunda etapa inicia en el año 2010, que a diferencia de la primera es de largo plazo, la cual se caracteriza por

la falta de recursos para su financiación que serán destinados a las obras faltantes de la cuenca media y su ejecución dependerá de los recursos adicionales que se consigan tales como: Nación, de cooperación internacional, etc. y se anota que estas condiciones son igualmente válidas para los municipios de la cuenca alta, que deberán continuar ampliando su cobertura de servicios de alcantarillado. En esta fase, se agrega, se construirá la PTAR Canoas.

**6.10.3.5. La propuesta incluye las siguientes acciones a desarrollar:**

**6.10.3.5.1. ACCIONES PARTICULARES A DESARROLLAR POR PARTE DEL DAMA**

**6.10.3.5.1.1. Acorde con los recursos financieros** el DAMA participará en la descontaminación del río Bogotá con la ejecución de los siguientes programas:

☛ Programa de control de la contaminación en la fuente

☛ Programa para el control integrado del recurso hídrico de Bogotá

☛ Programa de Tasa Retributivas.

**6.10.3.5.1.1.1. *Programa de Control de la Contaminación en la Fuente***

**6.10.3.5.1.1.1.1. Seguimiento y Monitoreo de Efluentes Industriales**

Se indica que en aplicación del modelo comando control, se han ejecutado seis fases del programa de seguimiento y monitoreo y se tiene prevista la iniciación de la séptima fase. El objetivo es generar la verificación del cumplimiento de las normas ambientales en materia de vertimientos en el sector empresarial de la ciudad, así como, realizar los aforos y muestreos necesarios en los cuerpos de agua. Su costo anual aproximado asciende a los \$500'000.000.00, cuando es ejecutado bajo la modalidad de convenio Interadministrativo, con el cual se busca potenciar los recursos.

Sobre esta propuesta, la Sala insiste en el DAMA debe darle cumplimiento al igual que la CAR a lo ordenado en el punto 6.5.3.1., para lo cual debe proceder a celebrar el correspondiente convenio interadministrativo con el IDEAM y con la CAR en atención, como se anotó a que exista una sola RED DE MONITOREO direccionada por el IDEAM y alimentada por los órganos de control ambiental.

#### 6.10.3.5.1.1.1.2. Asistencia Técnica Ambiental para la MIPYME de BOGOTÁ – ACERCAR

Dan cuenta que actualmente se está ejecutando la cuarta fase del programa ACERCAR, cuyo objetivo principal es operar un instrumento, para este caso una ventanilla, que permita la promoción del tema ambiental y a donde puedan acudir los empresarios de la MIPYME a resolver sus inquietudes y obtener en caso necesario un acompañamiento calificado en el tema de ambiental, igualmente el programa presenta otras líneas de acción como es la constitución de herramientas que permiten el manejo de los problemas ambientales a nivel casi sectorial, permitiendo así, una mayor cobertura de la gestión realizada por el DAMA, estas son; Parques Industriales Ecoeficientes (seis parques), Bolsa de Residuos, Convenios de Producción más Limpia y Promoción de la Producción más

Limpia. La inversión que realizará el DAMA para la ejecución del programa es de \$ 800'000.000.oo, que se ejecutarán en dos años.

#### 6.10.3.5.1.1.3. Operación de la Red de Información de Calidad del Recurso Hídrico.

Dan cuenta que este año se está instalando y entra en operación la red de información de la calidad del recurso hídrico, la cual está conformada por 24 estaciones de monitoreo, el objetivo de su operación se basa en la obtención de información para la planificación del recurso y su conocimiento exhaustivo, así como el control de los excesos de carga, la inversión de adquisición, emplazamiento, ajuste, puesta en marcha conlleva inversiones de parte del DAMA de cerca de los \$800'000.000.oo, y se anota que la fase de operación incluye todos los análisis de laboratorio lo cual hará que los costos de operación y mantenimiento preventivo y correctivo sean altos, respecto al emplazamiento y puesta en marcha de la red.

En lo pertinente, la Sala dispone que el DAMA deberá estarse a lo dispuesto en los puntos 6.5.3.1. respecto de una sola Red Hidrometereológica y una Estación de Monitoreo direccionada por el IDEAM en los puntos de vertimiento que la CAR y el DAMA determinen en forma coordinada por ser las entidades que deben alimentar dicha información para el control de los vertimiento con el fin de optimar recursos.

#### 6.10.3.5.1.1.2. Programa de Manejo Integrado del Recurso Hídrico

Las acciones definidas que viene adelantando el DAMA en pro de la recuperación de la calidad y cantidad del recurso hídrico en la ciudad,

pretenden articular la gestión sobre el recurso desde todos componentes ambientales que directa o indirectamente pueden generar afectación al recurso, es así como; se expresa, este Departamento continuará trabajando en la medida que los recursos financieros así lo permitan en los temas de; la **formulación del Plan Maestro de Cerros Orientales**, recuperación de humedales, programas de educación ambiental y manejo de áreas estratégicas que conforman la estructura ecológica principal.

Se resalta que es de suma importancia para el DAMA poder contar con los recursos provenientes de tasas retributivas y así dar cumplimiento a la normatividad nacional y poder generar todo un programa de impacto a bajo costo de manera significativa el grado de contaminación que presenta nuestra red hidrográfica.

La Sala debe anotar a ese respecto, que del DAMA deberá proceder a coordinar los programas de educación ambiental con la respectiva Secretaría de Educación, de Salud y de Agricultura, todo lo concerniente a dicha propuesta, orden esta que se extiende a esas dependencias del Distrito Capital.

Además, en este punto la Sala debe señalar, al igual que la orden que se le imparte al MINISTERIO DE MINAS Y ENERGÍA, MAVDT y a la CAR, que los recursos no pueden distraerse hacia reforestación y a la recuperación ambiental de la zona objeto de exploración de los recursos naturales que a los particulares les corresponda hacer en los casos en que no hayan dado cumplimiento a las obligaciones del Estudio de Impacto ambiental, o en todo caso si el daño al medio ambiente es consecuencia de la exploración. Para tales efectos, en el término máximo de seis meses contados a partir de la notificación de la presente sentencia deberá proceder a adelantar los correspondientes expedientes administrativos y las sanciones pecuniarias a que haya lugar y la compulsa de las piezas

pertinentes para ante la FISCALIA GENERAL DE LA NACIÓN para que adelante las investigaciones correspondientes.

6.10.3.5.1.1.2.3. *Programa de Tasa Retributivas*

Se menciona que el programa de tasas retributivas requiere un inventario detallado de la totalidad de los usuarios objeto de cobro, que se ha realizado a la fecha sobre los tres principales ríos de la ciudad, SALITRE, TUNJUELO y FUCHA, el cual implicó una inversión de \$142'000.000.oo.

Se anota que posterior al inventario se requiere del fortalecimiento del programa a través de la conformación de un equipo de profesionales que implementen el programa que actualmente incluye un ingeniero y un economista con los cuales se tiene una inversión anual de \$79'400.000.oo. Se agrega que en este ítem hace falta la contratación de tres profesionales y un técnico cuya inversión anual asciende a \$130'800.000.oo.

Se informa que el programa de tasas retributivas incluye la actividad de seguimiento y monitoreo de las cargas contaminantes vertidas, que conlleva una inversión en aforo y muestreo, la cual puede ascender anualmente a los \$300'000.000.oo.

Se pone de presente que el flujo mensual del recaudo de tasas retributivas asciende a \$ 500'000.000.oo, para los cuales el DAMA presenta unos lineamientos de inversión, así:

Para tales efectos, mencionan que de acuerdo al contenido del Decreto 1729 de 2002, el recaudo proveniente de la tasa retributiva presenta una

destinación específica tendiente a la formulación y ejecución del Plan de Ordenación de las Cuencas que para este caso corresponden a SALITRE, TUNJUELO y FUCHA.

En materia de tasa retributiva, deberá tener en cuenta el Distrito Capital la Resolución CRA 287 de 2004, la cual debe incluirse dentro de la tarifa de agua, por lo que deberá coordinar con la EAAB el punto relativo a esta propuesta para darle viabilidad y cumplimiento, debiendo tener en cuenta la transferencia que la EAAB debe realizar a la CAR en el porcentaje que de acuerdo con su jurisdicción ésta tiene dentro del Distrito Capital, esto es lo que se recaude en el sector rural, habida cuenta que si el DAMA es la autoridad ambiental dentro del área urbana del distrito es a éste a quien está destinada, según el artículo 66 de la Ley 99, el pago de la tasa retributiva. Para lo cual la EAAB y la CAR como el DAMA deben esclarecer el censo de usuarios en cada sector.

De otro lado, debe resaltarse que en materia de inversión de los recursos por tasas retributivas, el DAMA (Como la CAR Y EL MAVDT) deberá estarse a lo dispuesto en los puntos 6.5.9., respecto de las obligaciones a cumplir por los particulares, como también deberá tener presente que la consagración legal tiene como objetivo fundamental el saneamiento y descontaminación (art. 66/Ley99/93). Por consiguiente, para reforzar la eficiencia de sus funciones en el control de vertimientos deberá tener en cuenta lo dispuesto sobre la prestación del servicio Militar Obligatorio Ambiental, la Policía Ambiental y los Guardabosques, como se ordena en el numeral 6.5.16. de esta sentencia, por cuanto la finalidad de incluir dentro de la tarifa de agua, el cobro de la tasa retributiva, tal y como así lo hizo ver la Magistrado Sustanciadora a la Ministra del Medio Ambiente y a la Comisión de Regulación de Agua Potable, fue que su destino quedase afecto para la construcción de la Planta de Tratamiento de Canoas para la cual la EAAB no contaba con los recursos, no encontrando sentido la Sala que se continúe distrayendo su cobro para

inversiones que propiamente no son para la descontaminación de la fuente hídrica, por lo que la Sala no avala ni aprueba que se destine para otros planes diferentes al acabado de mencionar.

#### 6.10.3.5.1.2. *Fuentes de Financiación*

A continuación se describen las fuentes de financiación para el proyecto de Saneamiento del Río Bogotá y las restricciones que deben tenerse en cuenta:

Mencionan que la financiación propuesta se basa en las tarifas actuales de la Empresa de Acueducto y Alcantarillado de Bogotá, así como en las proyecciones de recursos de acuerdo con los soportes legales existentes a la fecha, tales como los recursos de la Ley 715, el impuesto predial, las tasas retributivas y por uso del agua, entre otros.

6.10.3.5.1.2.1. *Tarifas Empresa de Acueducto de Bogotá:* Refieren que corresponde a la suma de los montos de las inversiones en infraestructura del sistema troncal de alcantarillado que se encuentran incluidas en el plan de inversiones de la Empresa de Acueducto de Bogotá y por lo tanto se encuentran financiadas con sus respectivas tarifas. De igual manera, se incluyen los costos de la operación de dicha infraestructura, los cuales también se financian con las tarifas de la Empresa de Acueducto de Bogotá.

Se indica que la restricción en esta fuente de financiación, se daría si se modifica el esquema actual de la estructura tarifaria por parte de la Comisión de Regulación de Agua Potable y Saneamiento Básico CRA, para lo cual es necesario calcular la tarifa actual de cada uno de los servicios de diversos sectores de consumo (industrial, comercial y residencial) y dentro del consumo residencial diferentes estratos y rangos de consumo.

Dentro de este recurso, merece resaltarse que la RESOLUCIÓN CRA 287 DE 2004 favorece el Plan de Descontaminación del RÍO BOGOTÁ en cuanto se incluyó dentro del cargo de consumo, el costo medio de tasas ambientales (art. 4 y 37).

6.10.3.5.1.2.2. *Ley 715 (30% del asignado al sector de agua potable y saneamiento básico)*: Considera la proyección de la asignación de la Ley 715 para el sector de agua potable y saneamiento básico para la ciudad de Bogotá. En tal sentido el Distrito se compromete a destinar recursos de la Ley 715 de 2001, a partir del 2004 en un 30% del 41% de Propósito General.

Las restricciones a esta fuente de financiación son:

- El Distrito al comprometer recursos superiores al 30% del 41% de Propósito General, dejaría de financiar los proyectos que tienen por objeto la ampliación de cobertura de acueducto y alcantarillado de los barrios legalizados como también a financiar otros proyectos de saneamiento básico, tales como algunas obras sobre disposición final de basuras que aún no están contempladas en el esquema tarifario.

Debe notar la Sala que la ampliación de la cobertura de acueducto y alcantarillado son costos de inversión que están incluidos dentro de las tarifas e igualmente, la operación de los rellenos sanitarios dentro del cobro del servicio de aseo, por lo que se estima que la transferencia que por el artículo 77 y demás normas concordantes de la Ley 715 le corresponde al Distrito tiene su destino específico para agua potable y saneamiento básico que no esté costado por ley con tarifas, por lo que, la Sala advierte, todo cambio a dicha destinación está condicionado a la certificación que la Sala advierte expida la Superintendencia de

Servicios Públicos Domiciliarios (lit. a), en el sentido de que el distrito tiene una cobertura superior al 90% de acueducto y el 85% al alcantarillado y demás requisitos señalados en los literales b) y c) del artículo 78 de la mentada ley.

La Sala observa que en el pacto del DC se hacen las siguientes precisiones:

- “El artículo 368 de la Constitución Política establece que la Nación y los entes territoriales podrán conceder subsidios para que las personas de menores ingresos paguen las tarifas de los servicios públicos domiciliarios. En desarrollo de la citada norma constitucional se expidió la Ley 142 de 1994 que en su artículo 89 ordena a los Concejos municipales crear "*Fondos de Solidaridad y Redistribución de ingresos*", cuya finalidad es la de obtener y canalizar los recursos con que han de subsidiar el pago de servicios públicos a los usuarios de estratos 1, 2 y 3.

“Para dar cumplimiento a lo anteriormente mencionado el Concejo mediante Acuerdo 31 de 2001, creó, adscrito a la Secretaría de Hacienda, el FONDO CUENTA DE SOLIDARIDAD Y REDISTRIBUCIÓN DE INGRESOS y actualmente se está reglamentando su funcionamiento y financiación, para lo cual se podrá disponer de parte de los recursos que la Ley 715 de 2001 permita utilizar.

- “Otra restricción al comprometer proyecciones de recursos de la Ley 715 de 2001, es la posible modificación de la distribución del Sistema General de Participaciones por parte del Gobierno Nacional.

Sobre este aspecto cabe mencionar que no fue objeto de modificación para la fecha de la sentencia que implique la disminución del porcentaje previsto en la citada ley.

- “Trámite de Vigencias Futuras. Para comprometer presupuestos que involucren varias vigencias, el Distrito tiene que acatar los procedimientos establecidos en la Ley 819 de 2003 que en su artículo 10 establece:

*"Vigencias futuras ordinarias.* El Confis podrá autorizar la asunción de obligaciones que afecten presupuestos de vigencias futuras cuando su ejecución se inicie con presupuesto de la vigencia en curso y el objeto del compromiso se lleve a cabo en cada una de ellas siempre y cuando se cumpla que:

- a) El monto máximo de vigencias futuras, el plazo y las condiciones de las mismas consulte las metas plurianuales del Marco Fiscal de Mediano Plazo de que trata el artículo 1 de esta Ley;
- b) Como mínimo, de las vigencias futuras que se soliciten se deberá contar con apropiación del quince por ciento (15%) en la vigencia fiscal en la que éstas sean autorizadas;
- c) Cuando se trate de proyectos de inversión nacional deberá obtenerse el concepto previo y favorable del Departamento Nacional de Planeación y del Ministerio del ramo.

“La autorización por parte del Confis para comprometer presupuesto con cargo a vigencias futuras no podrá superar el respectivo período de gobierno. **Se exceptúan los proyectos de gastos de inversión en aquellos casos en que el Conpes previamente los declare de importancia estratégica.**

A ese respecto, no puede echarse de menos que la descontaminación del RÍO BOGOTÁ ha sido un propósito incluido en el Documento Conpes 3177 y actualmente es uno de los objetivos principales de la nueva versión 2004.

Continúa el Distrito Capital en su propuesta de pacto, señalando que por otra parte el artículo 14 del Decreto 714 de 1996, establece:

*“De las Vigencias Futuras.* La Administración Distrital podrá presentar para aprobación del Concejo Distrital la asunción de obligaciones, que afecten presupuestos de vigencias futuras, cuando su ejecución se inicie con el presupuesto de la vigencia en curso y el objeto del compromiso se lleve a cabo en cada una de ellas, siempre que los proyectos estén asignados en el plan de desarrollo respectivo y que sumados todos los compromisos que se pretendan adquirir por esa modalidad, no excedan la capacidad de endeudamiento. Cuando se trate de proyectos de inversión deberá obtenerse un concepto previo y favorable del Departamento Administrativo de Planeación.

“Estas disposiciones se aplicarán a Empresas Industriales y Comerciales del Distrito, Sociedades de Economía Mixta.

Sobre dicha advertencia la Sala resalta que la Ley 812 de 2003 “PLAN NACIONAL DE DESARROLLO” incluyó la descontaminación del RÍO BOGOTÁ como uno de los proyectos prioritarios, **por lo que las obras tendientes al logro de dicho objetivo pueden comprometer vigencias futuras con la apropiación anticipada de los mismos** (incluyendo un incremento superior al 30% del 41% del Propósito General ofrecido por el D.C. como una de sus propuestas de Pacto de Cumplimiento para la descontaminación del río Bogotá, que en el porcentaje superior será objeto de condena en la sentencia con el fin de que se pueda construir el interceptor Tunjuelo-Canoas y la Planta Elevadora y de tratamiento de

Canoas, como el interceptor Canoas-Alicachín), **cuando su ejecución se inicie con el presupuesto de la vigencia en curso.**

6.10.3.5.1.2.3. *Impuesto Predial Bogotá 7.5% - Fondo Cuenta Río Bogotá:* Se asigna el 7.5% del predial de Bogotá durante todo el período de evaluación del proyecto. Estos recursos se utilizan en el año 2003, para financiar la infraestructura de la Planta de Tratamiento de Aguas Residuales El Salitre (estructura existente). y en los años subsiguientes para financiar el proyecto integral de descontaminación del Río Bogotá. Como *Restricción* se indica que “esta fuente se vería afectada si se produce un cambio normativo que modifique las proyecciones de recaudo futuro de dicho ingreso. Sobre dicho porcentaje, la Sala debe señalar que el parágrafo 2 del artículo 44 de la Ley 99 de 1993 es ostensiblemente claro en señalar que se destinará a inversión en el municipio o distrito donde se recaude, por lo que la CAR junto con las referidas entidades territoriales a donde va destinado debe priorizar las obras que se ejecutarán con cargo a dichos recursos, en cuanto si van destinados para ser invertidos en éstas, se considera que no es de su exclusiva autonomía el decidir para dónde van. En todo caso, el tribunal debe advertir que la decisión de su destino por ser manifestación de la voluntad de un ente administrativo que produce efectos jurídicos frente a terceros tiene la naturaleza de acto administrativo y como tal debe estar suficientemente motivado, esto es respaldado en razones no solo legales sino de conveniencia al interés general para que goce de presunción de legalidad so pena de su invalidez.

6.10.3.5.1.2.4 *“Tasas Retributivas y por uso del agua:* Se considera la asignación al proyecto del Río Bogotá del 50% de la proyección del pago de tasas retributivas que haría la Empresa de Acueducto de Bogotá a las corporaciones o entidades ambientales.

Se advierte que “La estimación de esta fuente de financiación está condicionada a los nuevos cambios que el Gobierno Nacional establezca para su destinación y cobro. Así mismo está condicionada a la resolución de una disputa jurídica entre la CAR y el DAMA, en la interpretación del Artículo 66 de la Ley 99 de 1993.

Debe tenerse en cuenta las consideraciones del punto 6.10.3.5.1.1.2.3., advirtiéndose que el total de su ingreso debe destinarse para el saneamiento y la descontaminación del río según lo prescrito en el artículo 66 de la Ley 99 de 1993, por lo cual, no existiendo otras fuentes de financiación para la construcción de la PTAR Y LA ESTACIÓN ELEVADORA CANOAS y de los interceptores TUNJUELO CANOAS. CANOAS ALICACHÍN como más adelante se dispondrá, no podrá destinarse a inversiones diferentes, máxime que su recaudo, según la Ley 99, está previsto para obras de descontaminación de las fuentes hídricas que son afectadas por los quienes las utilizan y deben pagarlas.

#### 6.10.3.5.2. INVERSIONES EN BOGOTÁ POR LA EMPRESA DE ACUEDUCTO DE BOGOTÁ

“El plan de inversiones de la Empresa de Acueducto y Alcantarillado de Bogotá, contempla la realización de obras hasta el año 2015.

6.10.3.5.2.1. “En especial, el plan de inversiones contempla la ejecución de obras de expansión del sistema entre las cuales están el abastecimiento, tratamiento, almacenamiento, distribución, alcantarillado sanitario y pluvial, ambientales, institucionales, rehabilitación de los sistemas y reposición de activos para acueducto y alcantarillado sanitario y pluvial.

6.10.3.5.2.2. “Específicamente obras relacionadas al sistema de drenaje de la ciudad con impacto, varias de ellas en el proyecto de saneamiento, se cuenta en el plan de inversiones de alcantarillado troncal sanitario y pluvial, en alcantarillado secundario sanitario y pluvial, inversiones en obras de protección y manejo ambiental, igualmente se incorporan las obras de rehabilitación de los sistemas y el plan de reposición de activos.

6.10.3.5.2.3. “El plan de inversiones del Acueducto de Bogotá, se desarrollará conforme a la priorización de las inversiones en toda la ciudad, y su fuente de financiación son las tarifas que proporcionan los recursos para la realización de las mismas obras.

6.10.3.5.2.4. “Las obras se desarrollan integrando todas las actividades que se interrelacionan, como un todo, tal como ocurre con los proyectos de interceptores, colectores y rehabilitaciones de quebradas, las cuales de acuerdo al plan de inversiones, se van ejecutando en paralelo para aprovechar las economías de escala que se dan al momento de realizar este tipo de trabajos.

6.10.3.5.2.5. “Adicionalmente, se evalúa el aporte de las inversiones a las metas de la empresa, tales como coberturas, ejecución presupuestal y otros indicadores que son utilizados para verificar el desempeño de la Empresa de Acueducto.

6.10.3.5.2.6. Dentro del plan de inversiones 2002-2015, se tiene previsto realizar una inversión total de 2.52 billones de pesos en valor presente neto de diciembre de 2002.

6.10.3.5.2.7. Con la Propuesta de Pacto de Cumplimiento, se allega anexo sobre el plan de inversiones de la Empresa de Acueducto de Bogotá, el cual contiene todas las obras a realizar en los próximos años.

6.10.3.5.2.8. Propuesta Para Pacto De Cumplimiento

- 6.10.3.5.2.8.1. “Sistema De Tratamiento De Aguas Residuales De La Cuenca Media

Anexo se presenta el cuadro con las obras que se incluyen de la cuenca media en el programa de saneamiento del río Bogotá, solo se presenta la cuenca media, ya que involucra únicamente las entidades que hacen parte de esta cuenca.

Cuenca Media

|                                                        | ACCIONES A DESARROLLAR                                                                                                                                                                                        | RESPONSABLE PRINCIPAL | FUENTES DE FINANCIACIÓN | COSTOS (millones de dólares de 2002)    |  |
|--------------------------------------------------------|---------------------------------------------------------------------------------------------------------------------------------------------------------------------------------------------------------------|-----------------------|-------------------------|-----------------------------------------|--|
|                                                        | Terminación, intercepción y control de las aguas residuales y lluvias, y viceversa, del sistema de alcantarillado sanitario y pluvial secundario de Bogotá.<br>(Control de conexiones erradas a los sistemas) | Acueducto de Bogotá   | Tarifas                 | Según el Plan de Inversiones de la EAAB |  |
| Construcción de Interceptores Troncales del Río Bogotá |                                                                                                                                                                                                               |                       |                         |                                         |  |

|  |                                                                                                            |                     |         |                       |      |  |
|--|------------------------------------------------------------------------------------------------------------|---------------------|---------|-----------------------|------|--|
|  | Interceptor Engativá – Cortijo                                                                             | Acueducto de Bogotá | Tarifas | Inversión (2004-2006) | 4    |  |
|  | Interceptor Fucha – Tunjuelo                                                                               | Acueducto de Bogotá | Tarifas | Inversión (2003-2008) | 84.6 |  |
|  | Estación Elevadora de Aguas Residuales Tunjuelo                                                            | Acueducto de Bogotá | Tarifas | Inversión (2004-2006) | 25.5 |  |
|  |                                                                                                            |                     |         | Operación (2007-2020) | 58.5 |  |
|  | Ejecución del proyecto de control de inundaciones para el Río Bogotá (jarillón margen izquierda y dragado) | Acueducto de Bogotá | Tarifas | Inversión (2006-2010) | 33.6 |  |

| CUENCA MEDIA DEL RÍO BOGOTÁ <sup>35</sup> |                                                                       |                       |                         |                                     |     |  |
|-------------------------------------------|-----------------------------------------------------------------------|-----------------------|-------------------------|-------------------------------------|-----|--|
|                                           | ACCIONES A DESARROLLAR                                                | RESPONSABLE PRINCIPAL | FUENTES DE FINANCIACIÓN | COSTOS (millones de dólares 2002)   |     |  |
|                                           | Interceptor Tunjuelo Canoas                                           |                       |                         | Inversión (2008-2009)               | 62. |  |
|                                           | Estación Elevadora de Canoas y pretratamiento de las aguas residuales |                       |                         | Inversión (2009)                    | 18  |  |
|                                           |                                                                       |                       |                         | Operación (2010-2014)               | 13. |  |
|                                           |                                                                       |                       |                         | Operación (2015-2020) <sup>36</sup> | 17. |  |

| CUENCA MEDIA DEL RÍO BOGOTÁ |
|-----------------------------|
|-----------------------------|

<sup>35</sup>

<sup>36</sup> Obras que se construirán con los recursos por definir, que se obtengan de diferentes fuentes tales como: Ley 715, 7.5% del Impuesto Predial de Bogotá, Tasas Retributivas, Aportes de la Nación, Distribución de Regalías.

| OTRAS INVERSIONES EN LA CUENCA MEDIA |                                                                                                                                              |                                                                                                                        |                                                            |                                                       |  |
|--------------------------------------|----------------------------------------------------------------------------------------------------------------------------------------------|------------------------------------------------------------------------------------------------------------------------|------------------------------------------------------------|-------------------------------------------------------|--|
|                                      | ACCIONES A DESARROLLAR                                                                                                                       | RESPONSABLE PRINCIPAL                                                                                                  | FUENTES DE FINANCIACIÓN                                    | COSTOS                                                |  |
|                                      | Control efluentes industriales                                                                                                               | <ul style="list-style-type: none"><li>DAMA (gestión como autoridad ambiental)</li><li>Industrias (ejecución)</li></ul> | Recursos de las industrias y otras entidades contaminantes | Ver cuadro "Acciones Fomentar el desarrollo de la DA" |  |
|                                      | Recuperación y preservación de la ronda para el control de fuentes difusas (costado oriental, margen izquierda del río Bogotá) <sup>37</sup> |                                                                                                                        |                                                            |                                                       |  |
|                                      | Construcción, operación y mantenimiento de la PTAR Canoas <sup>38</sup>                                                                      |                                                                                                                        |                                                            | Inversión (2014-2017)                                 |  |
|                                      |                                                                                                                                              |                                                                                                                        |                                                            | Operación (2017-2020)                                 |  |

Se culmina diciendo que la fórmula contenida en el presente escrito corresponde a las obras que fueron explicadas y discutidas durante el desarrollo de las mesas de trabajo que se iniciaron el 21 de febrero de 2003, y que el gobierno de la ciudad, por intermedio de las entidades aquí señaladas, presentan de manera conjunta.

6.10.4. PROPUESTA DE PACTO DE CUMPLIMIENTO REGISTRADA POR LA EEB Y EMGESA

6.10.4.1. Se indica que se proponen adelantar las siguientes obras.

<sup>37</sup> Obras que se construirán con los recursos por definir, que se obtengan de diferentes fuentes tales como: Ley 715, 7.5% del Impuesto Predial de Bogotá, Tasas Retributivas, Aportes de la Nación, Distribución de Regalías.

<sup>38</sup> Idem

#### 6.10.4.1.1. “Dique Impermeable

“Construcción de un dique que reemplace la barrera direccional con una longitud del orden de 3.750 m. Este dique impermeable permitirá sectorizar el embalse en diversas zonas y dirigir el flujo de las aguas para aumentar su tiempo de permanencia en él.

#### 6.10.4.1.2. “Laguna Anaerobia o ZONA 1

“Conformación de una laguna anaerobia (ZONA 1) en la cual se reducirá la DBO (indicador de la carga orgánica) del agua que se bombea del río Bogotá en un 40 % con un período de residencia de 1.5 días. Esta zona estaría cubierta de buchón.

#### 6.10.4.1.3. “Laguna Aerobia o ZONA 2

“Dentro del mismo dique impermeable y separada de la ZONA 1 por una barrera flotante, se conformará una laguna aerobia (ZONA 2), que contará con aireación forzada en la cual el agua permanecería seis (6) horas, al cabo de las cuales se habría reducido la DBO en un 10 % adicional de su valor inicial de entrada al Embalse. Esta ZONA 2 estará libre de buchón.

#### 6.10.4.1.4. “Vertedero

“Para garantizar los tiempos de retención en estas ZONAS independizándolas de las fluctuaciones del nivel del Embalse propias de la actividad generadora, se construirá un vertedero que comunica la ZONA 2 con el cuerpo principal.

#### 6.10.4.1.5. “Zona de Control de Buchón

“En el cuerpo principal se conforman tres zonas separadas con barreras flotantes que tendrán distintas densidades de buchón. La que sigue a la ZONA 2, denominada zona de control de buchón o ZONA 3, tendrá una densidad de buchón de 20 kg/m<sup>2</sup>, lo que implica su cosecha. Esta ZONA servirá como área piloto para determinar la densidad óptima de buchón y su forma más eficiente de manejo. Así mismo, en esta ZONA continuará reduciéndose la DBO y la calidad de agua seguirá su proceso de mejora.

#### 6.10.4.1.6. “Cuerpo Principal o ZONA 4

“El cuerpo principal que se denomina ZONA 4 estaría separado de la ZONA 3 por una barrera flotante para evitar el paso del buchón, el agua que llega a ella ya tendrá una reducción aproximada en la DBO del 50% con respecto a las condiciones de entrada al Embalse. En ella el agua permanecerá 13,5 días y la densidad del buchón será de 60 kg/m<sup>2</sup>. A la salida del agua del Embalse, hacía la conducción de la cadena de generación Paraíso - Guaca (PAGUA) se habrá logrado una mejora sustancial de la calidad del agua.

#### 6.10.4.1.7. “Zona de Aislamiento y Protección del Municipio o ZONA 5

“Adicionalmente, se conformará una zona libre de buchón en el sector del Embalse más cercano al casco urbano (ZONA 5), para mitigar las condiciones de anidación de zancudos que provee el buchón. Se instalará una barrera flotante para retener el buchón del lado de la ZONA 3 y se cosechará totalmente el buchón en la franja así creada. Se instalará un sistema de aireación forzada (mediante tubería perforada subacuática y compresores que operen en forma continua), para reducir los malos olores y controlar zancudos.

“Las anteriores obras permitirán mejorar la circulación del agua en el Embalse con un sistema de zonificación que maximice los tiempos de retención y están estrechamente relacionadas con el mejoramiento que se produce en la calidad del agua para la Cuenca Baja.

“Para la ejecución de estas obras, se requiere que la Corporación Autónoma Regional CAR, amplíe el plazo de la recuperación morfológica de la Cantera del Muña, que esta prevista para el año 2004, hasta comienzos del año 2008, con el fin de aprovechar el material que se explotará para la recuperación de la cantera en la construcción del dique impermeable (VER CRONOGRAMA ANEXO). ESQUEMA DE LAS OBRAS.

“Lo anterior puede precisarse en el siguiente cuadro.

**OBRAS PROPUESTAS POR LA EEB S.A.  
E.S.P. Y  
EMGESA S.A. E.S.P.**

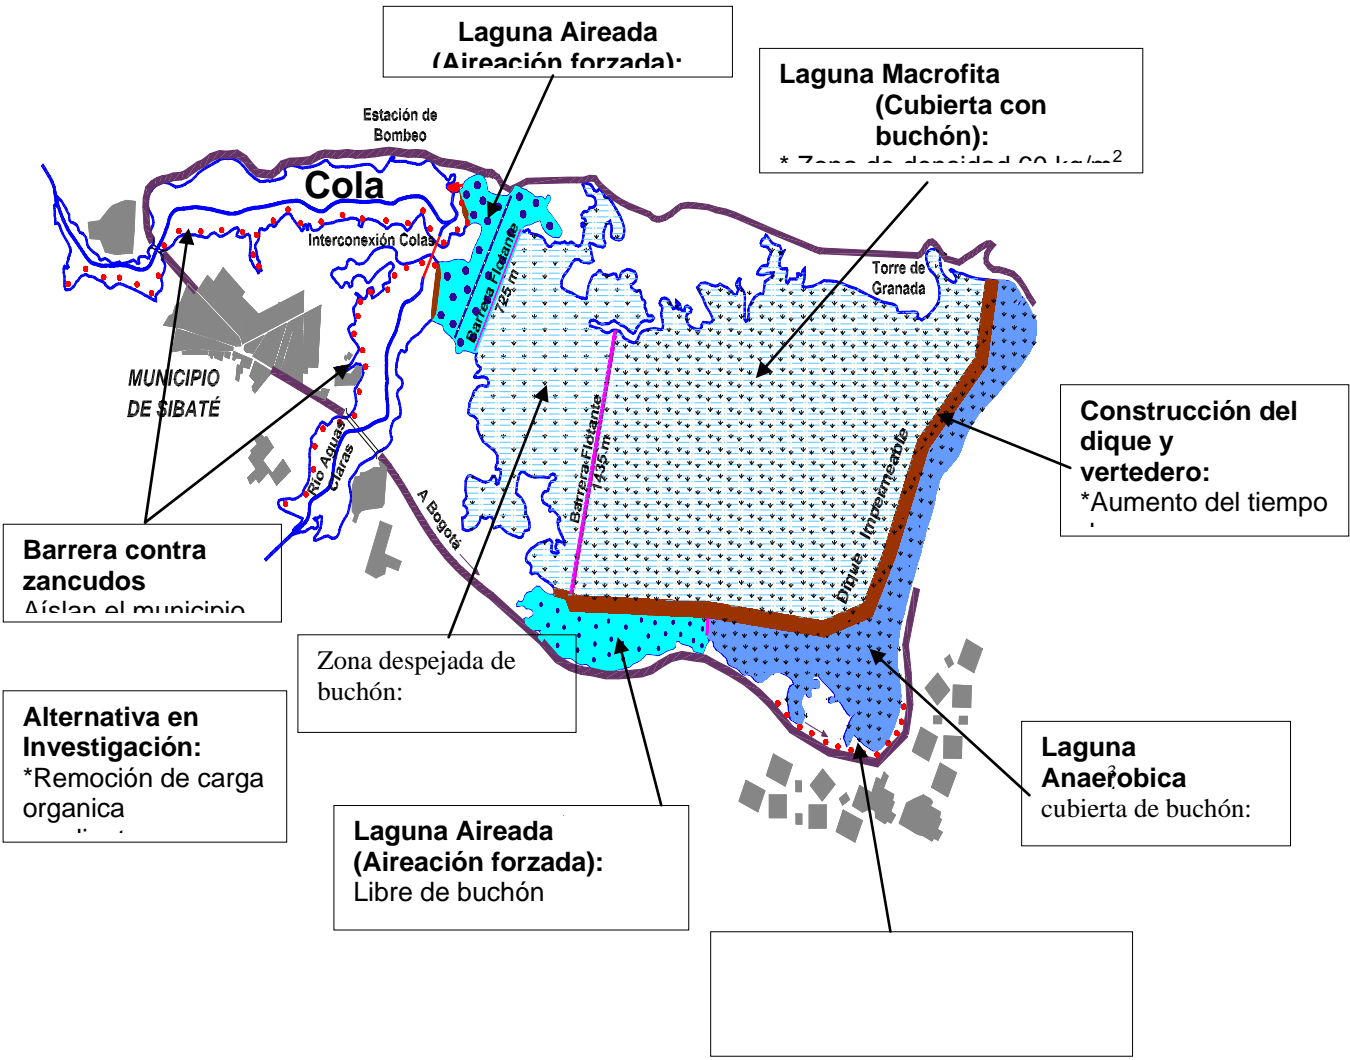

“El Gráfico presenta esquemáticamente las obras propuestas y las diversas zonas en que se divide el embalse y sus características.

BARRERA CONTRA ZANCUDOS

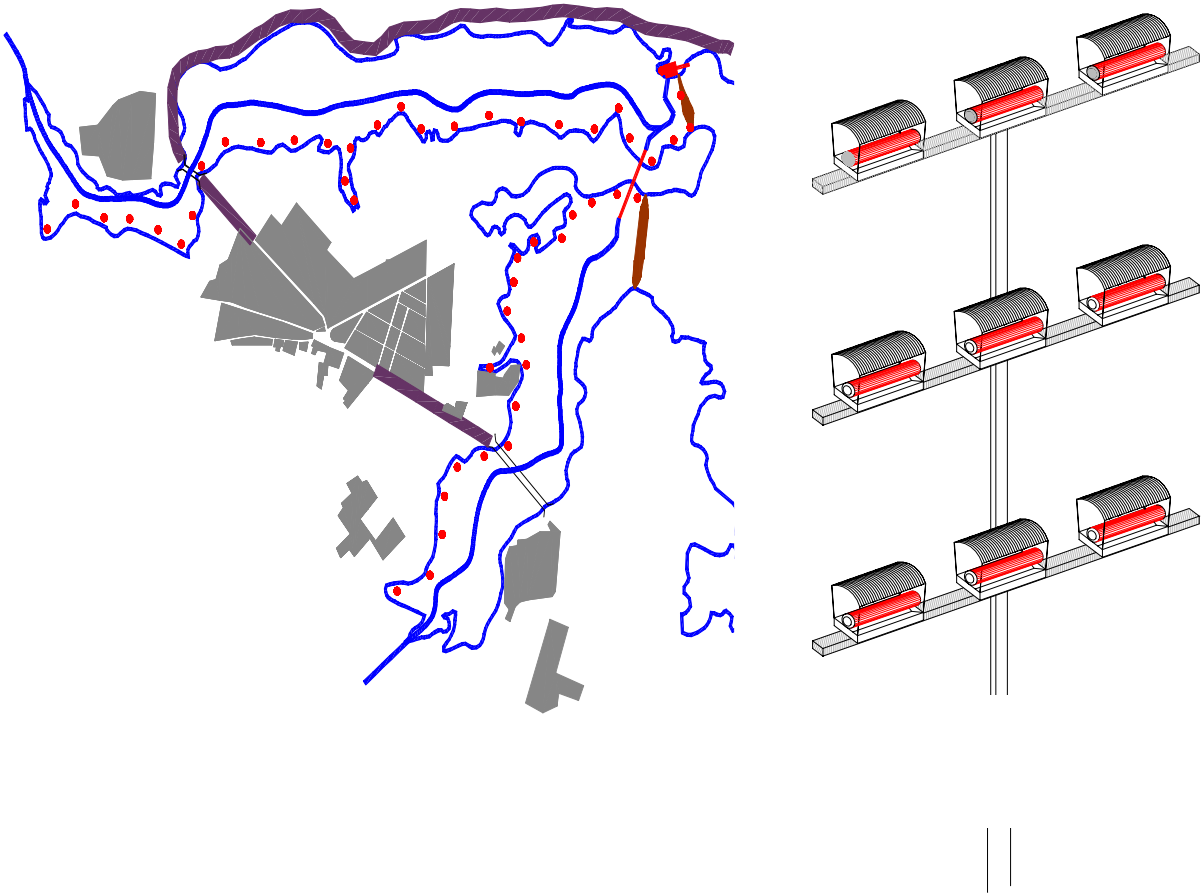

ESTADO ACTUAL DE LAS COLAS

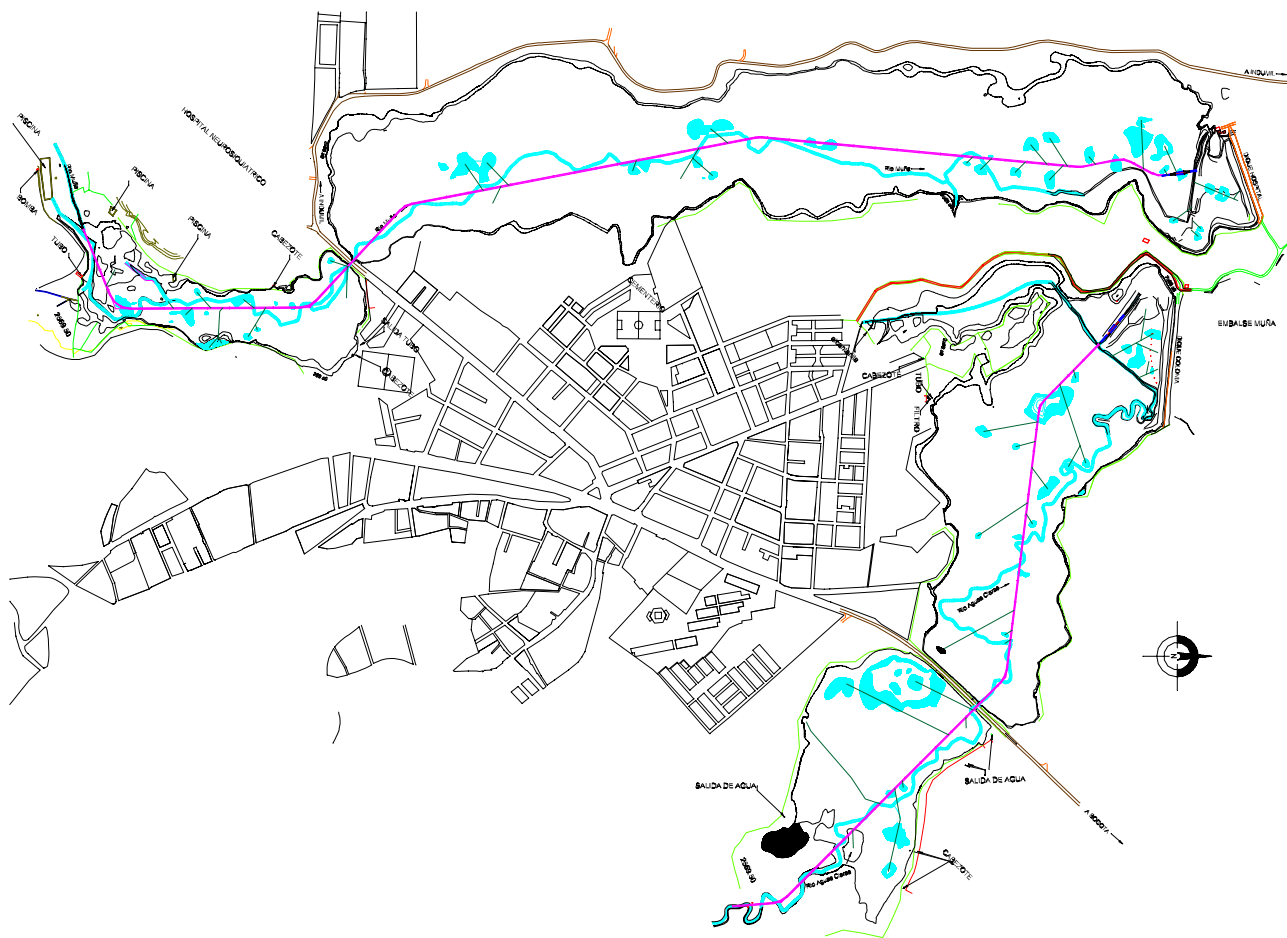

“Cabe anotar que se estudiará la alternativa de utilización de microorganismos con el fin de mitigar los impactos existentes. En el evento en que esta última opción ofrezca mejores resultados, se modificarán las obras para reflejar los beneficios en el uso de los microorganismos.

6.10.4.2. “CRONOGRAMA Y COSTOS

“Las obras descritas y propuestas en esta sección II tienen un costo aproximado de US\$4.7 Millones.

| ACCION                             | FECHA DE IMPLEMENTACIÓN | ASPECTOS TECNICOS                            |
|------------------------------------|-------------------------|----------------------------------------------|
| Construcción del Dique y vertedero | 2003 – 2005             | * Control de olores<br>* Reacondicionamiento |

|                                                                                                                                        |                 |                                                                                                                                               |
|----------------------------------------------------------------------------------------------------------------------------------------|-----------------|-----------------------------------------------------------------------------------------------------------------------------------------------|
|                                                                                                                                        |                 | del agua para mitigar el problema de los mosquitos<br>* Mejora la circulación del agua                                                        |
| Funcionamiento Laguna anaerobia, cubierta de buchón                                                                                    | 2005            | * Remoción 40%-50% de DBO<br>* Tiempo de retención 1.5 días                                                                                   |
| Zona Aerobia (Aireación Forzada)                                                                                                       | 2005 – 2006     | * Mejora estética<br>* Control de Buchón<br>* Remoción del 10% de DBO                                                                         |
| Funcionamiento de Laguna Macrofitas:<br>a) Zona con densidad de 20 Kg/m <sup>2</sup><br>b) Zona con densidad de 60 Kg/m <sup>2</sup> . | I semestre 2006 | * Cosecha del Buchón (Pruebas biológicas)<br>* Tiempo de retención 13,5 días                                                                  |
| Zona Libre de buchón cercana a las colas (Aireación)                                                                                   | Finales 2004    | * Control de olores<br>* Reacondicionamiento del agua para mitigar el problema de los mosquitos<br>* Adición de OD >= 1mg/L                   |
| Acciones varias en las colas                                                                                                           | 2003 – 2006     | *Control de mosquitos<br>*Mejoramiento estético<br>*Control potencial de olores<br>*Mejoramiento en la salud pública y condiciones sanitarias |

6.10.4.3. “OPERACIÓN Y MANTENIMIENTO DE LAS OBRAS PROPUESTAS POR EEB Y EMGESA.

“Con las obras planteadas por EEB- EMGESA se pretende mejorar la calidad del agua del Río, que de no hacerse lo tendría que hacer quién contamina, en otra parte y seguramente con costos muy superiores, tarea que no compete a EEB ni EMGESA, razón por la cual su operación y mantenimiento debe ser asumida por otras entidades.

“EEB y EMGESA están dispuestas, como parte integral de esta propuesta a realizar la operación y mantenimiento de las obras que se proponen construir, hasta el 31 de diciembre de 2006, de acuerdo con el cronograma anexo, realizando las siguientes actividades:

- Dragado y disposición de lodos.
- Operación y mantenimiento de sistemas de aireación.
- Cosecha y disposición de buchón.

“Se debe establecer la entidad o entidades que asumirán esta operación y mantenimiento, a partir del 1 de enero de 2007, cuando tales costos se reducirán por efecto de la mejora en la calidad de las aguas del Río.

#### 6.10.4.4. “OBRAS ADICIONALES QUE SE DEBEN DESARROLLAR

Advierten la EEB y EMGESA que las obras que se propone construir requieren de un mantenimiento y operación y se debe establecer la entidad o entidades que asumirán esta operación y mantenimiento a partir del 1 de enero de 2007.

“Es así que, para que la presente propuesta resulte exitosa, EEB y EMGESA son de la opinión que los siguientes actores deben coadyuvar en la solución de la problemática, mediante las siguientes inversiones:

6.10.4.4.1. **“Acciones Del Municipio De Sibaté**

6.10.4.4.1.1. “Construcción De Interceptor De Aguas Residuales.

El Municipio de Sibaté debe construir el interceptor principal y de los respectivos colectores de sus aguas residuales. Lo anterior con el fin de erradicar definitivamente la presencia de olores ofensivos y de hábitat de vectores, que actualmente se presentan por la descarga directa de estas aguas a las colas. La construcción de este colector principal permitirá la conducción de las aguas residuales del municipio a la estación de bombeo, desde donde se descargará al cuerpo principal del Embalse.

6.10.4.4.1.2. . “Construcción De La Planta De Tratamiento De Aguas Residuales.

“En el corto plazo el Municipio de Sibaté debe implementar el tratamiento de sus aguas residuales antes de que sean bombeadas al Embalse del Muña, con el fin de cumplir la legislación ambiental. La PTAR coadyuvará de manera significativa a mejorar la calidad del agua que es vertida al Embalse del Muña por el Municipio.

6.10.4.4.1.3. **Acciones Complementarias Que Debe Desarrollar El Municipio De Sibaté.**

- “Restringir el uso de aguas contaminadas o de baja calidad para el riego de cultivos por parte de agricultores, con las consecuentes afectaciones a la salud de la población consumidora.

- “Eliminar los reservorios de aguas residuales utilizadas para el riego de cultivos perimetrales al embalse.
- “Manejo adecuado de los residuos sólidos para disminuir la población de roedores de la zona.

#### 6.10.4.4.2. **“Acciones De La Car**

- “La CAR de conformidad con las disposiciones legales vigentes debería realizar inversiones tendientes a mejorar la problemática de las aguas del Embalse del Muña.
- “Es necesario que la CAR reglamente los usos de agua de la zona y los vertimientos agrícolas e industriales al Embalse para reducir los aportes de nutrientes y de contaminantes.
- “La CAR debe agilizar los trámites para otorgar los permisos ambientales que se requieran para la construcción y operación de las obras acordadas en el pacto de cumplimiento.

#### 6.10.4.4.3. **“Acciones Adicionales De Terceros**

“Las industrias ubicadas en la zona perimetral del Embalse del Muña deben construir sus sistemas de tratamiento de aguas residuales para así poder descargar o efectuar vertimientos al Embalse, dentro de los parámetros de ley.

#### 6.10.4.3.4. **“Actividades Adicionales Que Se Deben Desarrollar Para Garantizar Las Acciones Que Desarrolla Eeb Y Emgesa En El Embalse Del Muña.**

- “Es necesario lograr una reducción de las concentraciones de fósforo del agua influente al Embalse, tratándola desde su fuente. Esta reducción se debe lograr por la vía de la normatividad a nivel nacional, reglamentando la composición de los productos, en especial los detergentes.
- “Debe establecerse un punto de coordinación técnico o comisión de seguimiento para la ejecución del Plan de Acción del Embalse del Muña, dado que es un programa complejo que implica acciones en diversos campos y que por su naturaleza requiere un permanente monitoreo y seguimiento.
- “El pacto de cumplimiento final e idealmente integral, o en su defecto el fallo, debe evidenciar que las labores al nivel del Embalse del Muña solo pueden ser de mitigación dado que las causas de la contaminación son los aportantes de vertimientos al río Bogotá aguas arriba del embalse, y la falta de tratamiento de tales aguas.

*“Los análisis efectuados además evidencian que:*

- “Resulta indispensable continuar con el bombeo de las aguas del Río Bogotá al Embalse del Muña, ya que en caso de suspenderse generaría unos impactos ambientales mucho más graves que los actuales, en especial en el sector que sigue aguas abajo de Alicachín. De acuerdo con los estudios realizados por la Universidad de los Andes, la suspensión del bombeo y el envío del caudal del río por su cauce natural en la cuenca baja generaría concentraciones de ácido sulfhídrico en la atmósfera que implican un nivel de alto riesgo y que eventualmente se tendrían que tomar medidas drásticas de protección,

tales como evacuación de viviendas, relocalización y cerramiento de vías.

- “Se debe aprovechar la capacidad depuradora del Embalse como un elemento para el mejoramiento de la calidad del Río Bogotá en su cuenca baja. Para esto debe disponerse su ordenamiento espacial, que consiste en sectorizarlo en zonas articuladas entre si, que presten diversas funciones para el mejoramiento secuencial de la calidad del agua, la cual debe ir mejorando mientras más cerca esté del casco urbano de Sibaté.
- Se debe aprovechar el uso del Embalse para la generación eléctrica, minimizando los impactos ambientales.

| ACCIONES COMPLEMENTARIAS DE EMGESA |            |          |          |          |          |          |          |          |          |          |          |          |          |          |
|------------------------------------|------------|----------|----------|----------|----------|----------|----------|----------|----------|----------|----------|----------|----------|----------|
| ACTIVIDAD                          | * Año 2003 | Año 2004 | Año 2005 | Año 2006 | Año 2007 | Año 2008 | Año 2009 | Año 2010 | Año 2011 | Año 2012 | Año 2013 | Año 2014 | Año 2015 | Año 2016 |
| Mantenimiento reforestación        | 7,0        | 28,1     | 28,1     | 28,1     | 28,1     | 28,1     | 28,1     | 28,1     | 28,1     | 28,1     | 28,1     | 28,1     | 28,1     | 28,1     |
| Contrato Guardabosques             | 15,1       | 69,1     | 69,1     | 69,1     | 69,1     | 69,1     | 69,1     | 69,1     | 69,1     | 69,1     | 69,1     | 69,1     | 69,1     | 69,1     |
| fumigación y rodentización         | 3,5        | 7,5      | 7,5      | 7,5      | 7,5      | 7,5      | 7,5      | 7,5      | 7,5      | 7,5      | 7,5      | 7,5      | 7,5      | 7,5      |
| Monitoreo de mosquitos             | 1,6        | 6,7      | 6,7      | 6,7      | 6,7      | 6,7      | 6,7      | 6,7      | 6,7      | 6,7      | 6,7      | 6,7      | 6,7      | 6,7      |
| Monitoreo de aguas                 | 1,9        | 3,8      | 3,8      | 3,8      | 3,8      | 3,8      | 3,8      | 3,8      | 3,8      | 3,8      | 3,8      | 3,8      | 3,8      | 3,8      |
| Divulgación a la comunidad         | 0,7        | 4,5      | 4,5      | 4,5      | 4,5      | 4,5      | 4,5      | 4,5      | 4,5      | 4,5      | 4,5      | 4,5      | 4,5      | 4,5      |
| TOTAL EN MILES US\$                | 29,8       | 119,7    | 119,7    | 119,7    | 119,7    | 119,7    | 119,7    | 119,7    | 119,7    | 119,7    | 119,7    | 119,7    | 119,7    | 119,7    |

|                                                    |         |
|----------------------------------------------------|---------|
| VALOR TOTAL ACCIONES COMPLEMENTARIAS EN MILES US\$ | 2.063,9 |
|----------------------------------------------------|---------|

\* Provisión para los ultimos 3 meses del año 2003

| ACCIONES ADICIONALES PROPUESTAS                  |            |          |          |          |          |          |          |          |          |          |          |          |
|--------------------------------------------------|------------|----------|----------|----------|----------|----------|----------|----------|----------|----------|----------|----------|
| ACTIVIDAD                                        | * Año 2003 | Año 2004 | Año 2005 | Año 2006 | Año 2007 | Año 2008 | Año 2009 | Año 2010 | Año 2011 | Año 2012 | Año 2013 | Año 2014 |
| Construcción barrera direccional                 |            |          |          |          |          |          |          |          |          |          |          |          |
| Operación estación de bombeo y monitoreo instrum | 5,3        | 4,2      | 4,2      | 4,2      | 4,2      | 4,2      | 4,2      | 4,2      | 4,2      | 4,2      | 4,2      | 4,2      |
| Asesoría                                         | 5,3        | 6,3      | 6,3      | 6,3      | 6,3      | 6,3      | 6,3      | 6,3      | 6,3      | 6,3      | 6,3      | 6,3      |
| Rectificación de cauces y manejo de taludes      | 14,0       | 21,1     |          |          |          |          |          |          |          |          |          |          |
| Reconformación de orillas y revegetalización     |            | 91,3     |          |          |          |          |          |          |          |          |          |          |
| Revegetalización herbacea, arborea y arbustiva   | 17,6       | 42,1     | 56,2     |          |          |          |          |          |          |          |          |          |
| TOTAL EN MILES US\$                              | 42,1       | 165,0    | 66,7     | 10,5     | 10,5     | 10,5     | 10,5     | 10,5     | 10,5     | 10,5     | 10,5     | 10,5     |
| VALOR TOTAL ACCIONES ADICIONALES EN MILES US\$   |            |          |          |          | 431,9    |          |          |          |          |          |          |          |

\* Provisión para los ultimos 3 meses del año 2003

“Es importante mencionar que las obras que en el EMBALSE DEL MUÑA ha venido realizando EMGESA para atender a los requerimientos de la CAR en el proceso que para el efecto le adelantó y que han sido denominadas PLAN DE VIDA MUÑA 2000, en razón a que las que se propone realizar junto con la EEB son complementarias a las realizadas con ocasión del referido plan.

“Así:

Señalan la EEB y EAAB que las obras del Plan Vida Muña 2000, “son el producto del consenso entre autoridades y representantes de la comunidad del municipio de Sibaté, la CAR y EMGESA S.A. E.S.P., con el acompañamiento de la Procuraduría General de la Nación, el 18 de mayo de 1999 se firmó el acta de compromiso para el inicio de la construcción de obras para la mitigación del impacto ambiental y la recuperación del Embalse del Muña. Se indica que esa acta reflejó el

compromiso de algunos de los actores en el área de influencia del Embalse del Muña.

Se anota que a pesar de ser la contaminación de las aguas del Río Bogotá la causa esencial de la problemática del Embalse del Muña, EMGESA S.A. E.S.P. ha aportado recursos financieros, técnicos y humanos, tendientes a mitigar la problemática en cuestión.

Mencionan que en el año 1999 se contrataron los respectivos estudios y la construcción de las obras definidas en los mismos se inició durante el primer trimestre de año 2000.

Se agrega que “Las obras que se han venido realizando han incluido:

- Construcción de diques separadores en las dos colas del embalse.
- Construcción de línea de media tensión y centro de control de motores.
- Construcción de estación de bombeo.
- Selección de la alternativa para el manejo de las colas con la ejecución de las fichas técnicas correspondientes.
- Dsecación de las colas del embalse, con la consecuente disminución de la capacidad de almacenamiento por el secado de las colas.

Expresa EMGESA S.A. E.S.P. que como aporte al pacto de cumplimiento que se propone, aporta las obras anteriores que ya viene adelantando, teniendo en cuenta que las mismas implican una inversión

causada a 30 de septiembre de 2003 aproximada de 10.000 millones de pesos.

#### 6.10.4.4.5. “ACCIONES COMPLEMENTARIAS AL ‘PLAN DE VIDA MUÑA 2000’”

“Actualmente EMGESA S.A. E.S.P. realiza la construcción de **una barrera direccional**, con el fin de incrementar la capacidad de auto-depuración del Embalse, *aumentando el tiempo de residencia de las aguas embalsadas*.

“La longitud de la barrera, inicialmente prevista por la Universidad de los Andes en su estudio de “*Saneamiento Ambiental del Embalse del Muña*” de noviembre de 1998, fue de 560m; en este momento se han construido 105 m.

“Entre los beneficios proporcionados por la barrera se encuentran (*siempre y cuando los agentes de contaminación aguas arriba no se intensifiquen*):

- Reducción de la concentración de sulfuro de hidrógeno (H<sub>2</sub>S) en el agua y con ello la disminución de malos olores.
- Reducción de sólidos suspendidos, DBO y DQO.
- Oxigenación de las aguas del cuerpo principal del embalse.
- Mejoramiento de la calidad del agua del Río Bogotá aguas abajo de la descarga de la central La Guaca, en Mesitas de El Colegio.

Se indica que en el evento en que se adopte la presente propuesta, como se indicará más adelante, se construirá un **dique que sustituirá la barrera direccional**.

“Como parte de este proceso (en desarrollo de su programa de gestión ambiental) EMGESA S.A. E.S.P. adelanta y seguirá adelantando anualmente las siguientes actividades adicionales:

- Establecimiento de cordón forestal en el perímetro del Embalse y su respectivo mantenimiento.
- Construcción y mantenimiento de cercas protectoras del Embalse.
- Programa de control de mosquitos – fumigaciones trimestrales.
- Programa de control de roedores – aplicaciones trimestrales de rodenticidas.
- Monitoreos de agua y mosquitos.
- Divulgación a la comunidad para mantenerla informada del avance de las actividades ejecutadas y pendientes por realizar.

Se asevera que los costos de las anteriores actividades proyectadas al año 2020 están en el orden de 2 millones de dólares equivalentes a cinco mil ochocientos setenta y siete millones novecientos ochenta y siete mil pesos m/cte (\$5.877.987.000) con una tasa de cambio de 1US\$ = \$2.848.

(VER CUADRO N° 2) ACCIONES COMPLEMENTARIAS DE EMGESA

#### 6.10.4.5. “ACCIONES ADICIONALES PROPUESTAS

#### **6.10.4.5.1. “Operación De Estación De Bombeo.**

“EMGESA S.A. E.S.P. operará y continuará con la operación y mantenimiento de la estación de bombeo de las colas, para garantizar el trasvase de las aguas de los ríos Muña y Aguas Claras y de las aguas residuales del Municipio de Sibaté, manteniendo al máximo las colas secas a fin de evitar la conformación, en la vecindad del casco urbano de Sibaté, de criaderos de mosquitos por almacenamiento permanente de aguas de escorrentía.

#### **6.10.4.5.2. “Rectificación De Cauces Y Bombeo De Aguas Servidas Del Municipio De Sibaté.**

“Para mejorar las condiciones hidráulicas de funcionamiento de los cauces naturales de los ríos Muña y Aguas Claras, y de los vertimientos directos que actualmente se realizan a las zonas desecadas de las colas del Embalse, se requiere la rectificación y reconfiguración de los cauces y sus respectivos taludes, con el fin de evitar la creación de potenciales almacenamientos de aguas estancadas, las cuales pueden servir como criaderos de zancudos.

“Para la ejecución de esta actividad EMGESA S.A. E.S.P. adelantó un levantamiento topográfico de las colas del Embalse del Muña, con el fin de definir el mejor trazado de los ríos Muña y Aguas Claras para su rectificación y el encauzamiento de las aguas servidas del Municipio de Sibaté, evitando la conformación de lagos y zonas estancas propicias para el criadero de zancudos. Este trazado será enviado a la CAR para su respectiva aprobación y posterior ejecución por EMGESA.

#### **6.10.4.5.3. “Reconformación De Orillas Y Revegetalización Herbácea, Arbórea Y Arbustiva.**

“EMGESA S.A. E.S.P. propone adelantar la reconformación de orillas para aumentar el ancho del cordón forestal, aislando en mayor grado zonas del cuerpo principal del Embalse.

#### **6.10.4.5.4. “Revegetalizacion Herbácea, Arbórea Y Arbustiva.**

“EMGESA S.A. E.S.P. terminó la siembra de la primera de las tres franjas establecidas en el estudio de alternativas de manejo ambiental en las colas del Embalse del Muña de marzo de 2002 elaborado por la firma Estudios Técnicos y Ponce de León; **se propone que a diciembre de 2004 tendrá reforestadas las demás franjas que contempla el plan de manejo ambiental.**

#### **6.10.4.6. “MANTENIMIENTO DE OBRAS Y ACTIVIDADES DE SEGUIMIENTO AL “PLAN DE VIDA MUÑA 2000” Y COMPLEMENTARIAS.**

EMGESA S.A. E.S.P. propone asumir el mantenimiento de las obras y actividades descritas en los puntos 1.3.1 (Operación de la Estación de Bombeo), 1.3.2 (Rectificación de Cauces y Bombeo de Aguas servidas del Municipio de Sibaté), 1.3.3 (Reconformación de Orillas y Revegetalización Herbácea, Arbórea y Arbustiva) y 1.3.4 (Revegetalización Herbácea, Arborea y Arbustiva) anteriores. Estas inversiones serán un aporte adicional a la mitigación de la problemática de las aguas del Río Bogotá. Este mantenimiento de estas obras implicará inversiones, proyectadas al año 2020, aproximadamente de 432 millones de dólares, equivalentes a mil doscientos treinta millones de pesos M/cte. (\$1.230.000.000). con una tasa de cambio de 1US\$=\$2848.

6.10.5. PACTO DE LA CAR

6.10.5.1. La CAR incluye como parte del pacto de cumplimiento que registra, las **Plantas de Tratamiento de Aguas Residuales:** (fls. 10 cuaderno No. 7 proyecto pacto cumplimiento).

| ESTADO DE LA OBRA               | MARZO DE 2003     |
|---------------------------------|-------------------|
| CONSTRUIDAS Y EN FUNCIONAMIENTO | Cajicá Madrid II  |
|                                 | Chía I            |
|                                 | Mosquera          |
|                                 | Chocontá Nemocón  |
|                                 | Cogua Sopo        |
|                                 | Facatativá Suesca |
|                                 | Funza Sesquile    |
|                                 | Gachancipá        |
|                                 | Subachoque        |
|                                 | Guatavita         |
|                                 | Tocancipá         |
|                                 | Madrid I          |
|                                 | Zipaquirá I       |
|                                 | Zipaquirá II      |
| EN PUESTA EN MARCHA             | La Calera         |
| EN CONSTRUCCIÓN                 | El Rosal          |
|                                 | Bojacá            |

- **PLANTA EL SALITRE:** (fl. 12 –13 cuaderno No. 7 proyecto pacto cumplimiento)

6.10.5.2. Pone de presente también que suscribió con el Distrito Capital el Convenio Inter.-Administrativo No. 250 del 3 de septiembre de 1997.

En la cláusula segunda de dicho convenio se acordó que la Corporación destinaría el 50% del porcentaje o sobretasa del impuesto predial que recibe el Distrito Capital (y que equivale al 75% del total de los recaudos por concepto de impuesto predial en el Distrito Capital), en la gestión ambiental dentro del perímetro urbano de Bogotá.

Menciona la **Distribución de los Ingresos del Fondo Cuenta** de acuerdo con los aportes realizados, para la descontaminación del río Bogotá, a diciembre 30 de 2002.

| Fuente del Recurso            | Valor  | Rendimiento | Total Aportes | Participación |
|-------------------------------|--------|-------------|---------------|---------------|
| CAR                           | 234570 | 114095      | 348664        | 86.10         |
| FONDO NACIONAL DE REGALIAS    | 27973  | 20269       | 48242         | 11.91         |
| FONDO AMBIENTAL DE LA EAAB    | 5011   | 3034        | 8044          | 1.99          |
| APORTES DEL GOBIERNO NACIONAL | 0      | 0           | 0             | 0             |
| TOTAL INGRESOS                | 267554 | 137397      | 404951        | 100.00        |

6.10.5.3. Se Refiere Igualmente a los siguientes **Proyectos De Convenios De Producción Mas Limpia:**

-Identificación de proyecto piloto demostrativos de PML en siete sectores productivos (flores, curtiembres, lácteos, panela avícola, porcícola y minería)

-Se realiza el cobro a 409 sujetos pasivos de la tasa retributiva ubicados en jurisdicción de la CAR, por valor de \$ 201 millones, de los cuales se han destinado el 16%.

6.10.5.4. **SECTOR SOACHA** (fls.15-16 cuaderno No. 7 proyectos pacto cumplimiento)

- **Áreas Protegidas y Ecosistemas Estratégicos:**

En consideración a la degradación de los ecosistemas estratégicos de los humedales de TIERRA BLANCA, NEUTA, TIBANICA Y EMBALSE DE TERREROS, por las acciones antropológicas tales como: rellenos ilegales, invasión de ronda de protección ambiental y vertimientos, **se suscribió el Convenio 201279 con FONADE**, por un monto de \$460.000.000 **con el fin de determinar estrategias** para la recuperación y manejo de los relictos y humedales del Altiplano Cundiboyasence.

Para el año de 2003 se prevé **la formulación de planes de manejo para realizar la protección, limpieza y delimitación de los humedales NEUTA, TERREROS Y TIERRA BLANCA** y la implementación de metodologías para declarar estas zonas como áreas protegidas.

- **Con relación al AGUA:**

Expresa que realizó el inventario de descargas de tipo doméstico e industrial al RÍO SOACHA y descargas al Río Bogotá, talleres de

capacitación y sensibilización en la organización de acueductos veredales, mesas de trabajo con líderes ambientales.

Indica que para el año 2003 se proyectó la formulación del plan de ordenamiento de la cuenca del RÍO SOACHA, el aislamiento y revegetalización de zonas de ronda de fuentes hídricas del citado río y la continuación de la conformación y registro de acueductos veredales.

- **SUELO**

Señala que dentro del diagnostico realizado por la corporación, se ha identificado **un alto deterioro ambiental del recurso suelo ocasionado por la deforestación**, el descontrolado grado de urbanización, hacinamiento, **inadecuada explotación minera y cambios en el uso del suelo**. Además de **la salinización de los suelos** producto del riego no regulado con aguas contaminadas.

Ante esta problemática, la CAR está asesorando y realizando acciones de acompañamiento con las juntas de acción comunal, en los ajustes del plano de ordenamiento territorial, además de participar con **MINERCOL en la elaboración del inventario minero**.

6.10.5.5. Previo a la presentación de sus compromisos comienza por definir los **Lineamientos PARA EL SANEAMIENTO DEL RÍO BOGOTÁ**: (fl. 16 cuaderno No. 7 proyecto pacto de cumplimiento)

Aduce que “la complejidad del saneamiento del Río Bogotá determina la necesidad de precisar los actores y los papeles que a cada uno le corresponden, sobre el entendido básico de que sí bien es un problema conjunto, las responsabilidades son diversas y las posibilidades de concurrencia a la solución son distintas. Las premisas que orientan la propuesta de pacto de cumplimiento, buscan una solución articulada a la

cual los diferentes actores involucrados participen (sic) según su responsabilidad y dentro del ámbito de su competencia funcional. Estos actores son:

*Actores Institucionales:* Aquellos que por su misión institucional deben participar en la solución y **que tienen a su cargo, por ley, el cuidado y preservación ambiental**, razón por la cual, tiene una vocación natural de participar en cualquier actividad, coordinar y vigilar las acciones que se efectúen con el propósito preciso de protección y saneamiento ambiental.

Dichos actores institucionales se dividen en:

- Activos porque tiene que proveer recursos para el saneamiento ambiental. Proveen recursos financieros, tal sería el caso de la Gobernación de Cundinamarca a través de la Secretaria del Medio Ambiente, la CAR, el DAMA, entre otros.
- Pasivos **que no tienen ingerencia directa e inmediata en el asunto**, pero que por funciones institucionales propias deben contribuir a la solución. Tales como el Ministerio de Ambiente, Vivienda y Desarrollo Territorial, Ministerio de Agricultura, IDEAM, entre otros.

*Actores no Institucionales:* Aquellos que en razón de su actividad económica hacen un aprovechamiento del río o lo utilizan para realizar sus vertimientos. Estos actores se dividen en:

- Actores Institucionalizados. Son los municipios que no cuentan con empresas prestadoras del servicio público de acueducto y alcantarillado, las empresas prestadoras del servicio público de acueducto y alcantarillado, empresas que utilizan el recurso hídrico para el cumplimiento de su objeto social, u organizaciones

gremiales de producción o medio ambiente o similares, tales como los municipios ribereños de la cuenca alta, media y baja; la EAAB, EMGESA, EEB, FEDEPAPA, ANALAC, ASOCOLFLORES, FEDEGAN, ONGS – como “Al Verde Vivo”.

- Actores Difusos. Que están compuestos por personas naturales o jurídicas, establecimientos de comercio e industriales informales.

De otro lado, se indica que **“motivados por la actividad desplegada por su despacho,** el Distrito y la CAR, adelantándose al pacto de cumplimiento y con el único propósito de mostrar modelos participativos de solución de esta problemática, **firmaron el día 6 de agosto de 2003 el documento denominado “Acuerdo para el Desarrollo Sostenible de la Cuidad Región”** . (fl. 17 cuaderno No. 7 pactos de cumplimiento)

Se agrega que **el Distrito Capital y la CAR llevarán a cabo las actividades necesarias para gestionar, de una parte las fuentes de financiación que permitan complementar el plan de inversiones requerido para el saneamiento del río Bogotá,** y, de otra parte, la formulación y puesta en marcha del Plan Regional Bogotá-Cundinamarca, dentro de los lineamientos adecuados para el desarrollo sostenible. En este sentido, **trabajarán en la constitución de un Fondo Mutuo de Inversión Ambiental.**

**Este documento es el resultado de las mesas de trabajo realizadas durante julio de 2003, de las que hicieron parte la Corporación Autónoma Regional de Cundinamarca – CAR-, la Secretaria de Hacienda Distrital, el Departamento Técnico Administrativo del Medio Ambiente –DAMA-, y la Empresa de Acueducto de Bogotá; que además contaron con el apoyo del Departamento Administrativo de Planeación Distrital –DAPD-** (fls. 19 cuaderno No. 7 pactos de cumplimiento).

Del citado documento, los puntos a señalar son: (fls. 17-18 cuaderno No. 7 proyecto de pacto de cumplimiento)

- **“Modelo de Desarrollo Futuro del Distrito Capital:**

“Hacer partícipe a la CAR en la determinación de los ingredientes de planificación que contengan valores ambientales, así como en las decisiones que influyan e impacten el territorio.

- **“Plantas de Tratamiento de Aguas Residuales:**

**-“Declarar que el sistema de tratamiento de las aguas residuales de Bogotá, corresponde a la nueva alternativa estudiada por el Distrito.**

Este sistema será complementado con el mejoramiento de la calidad del agua en al Embalse del Muña.

-“Incluir las PTAR existentes en un nuevo esquema de manejo regional que asegure el saneamiento integral del territorio, en forma consistente con la visión regional.

**-“Atender prioritariamente la mitigación de los impactos ambientales de acuerdo con la capacidad de descontaminación existentes en la región,** así como utilizar la autodepuración natural de los cuerpos de agua.

- **“Otros Usos del Agua del Río Bogotá (Riego):**

“Aprovechar el agua de calidad inapropiada para consumo humano y apropiada para riego, con el fin de reducir la presión sobre la frontera

agrícola y desincentivar la urbanización. Algunas de las posibles acciones que se desprenden de esta situación serían:

-“Utilización del efluente de las PTAR de El Salitre, preferiblemente para complementar las etapas 4 y 5 del Distrito de Riego La Ramada en el occidente de la Sabana.

-“Aumento de la oferta de agua para riesgo con el apoyo de Tominé y Chingaza.

-“Impulsar un acuerdo para establecer permanentemente la disponibilidad de agua y la selección de uso social, económico y ambiental más eficiente. Es necesario construir el modelo apropiado para disponer de un balance hídrico, con el fin de establecer el agua disponible en la cuenca. Dicho acuerdo se presentara en la Mesa de Planificación Regional para coincidir con sus lineamientos.

-“Convertir el Comité Hidrológico en un instrumento permanente de consulta del organismo de planificación regional que sea creado, debiéndose incluir la planificación del uso de los caudales en la cuenca, incluyendo Chingaza.

- **“Manejo Ambiental Cuenca del Río Bogotá:**

-“Convertir la materialización de medidas de protección y recuperación de los nacimientos de los ríos de la región.

-“Regularizar y controlar la demanda de agua para todos los usos a lo largo de la cuenca.

-“Crear conciencia sobre la necesidad y utilidad de las zonas de ronda, y el mantenimiento y fortalecimiento de programas de producción más limpia.

-“Armonizar los criterios para la definición de ronda hidráulica en toda la cuenca del río.

- **“Planta de Tratamiento de Aguas Residuales de la Cuenca Alta y la Margen de la Cuenca Media:**

“El principio general normativo es que **el costo de inversión, operación y mantenimiento de las PTAR, se incluyan en la tarifa.** Si este principio no se cumple y quien presta el servicio no es el municipio, se debe celebrar contrato entre quien lo presta y el municipio para que este pague la diferencia. La tarifa debe reflejar el costo eficiente de la prestación del servicio pleno.

“Las circunstancias apuntan a que durante un tiempo parte de los recursos destinados al medio ambiente tendrán que orientarse a apoyar la descontaminación; **es de gran importancia lograr el apoyo de la Nación para la ejecución d las obras de saneamiento de la cuenca del río.**

“De otro lado, las utilidades de la EMPRESA REGIONAL DE ACUEDUCTO Y ALCANTARILLADO deben destinarse preferencialmente a la inversión en saneamiento, por lo que el DISTRITO CAPITAL y la CAR llevarán a cabo las actividades necesarias para **asegurar de una parte las fuentes de financiación que permitan complementar el plan de inversión requerido para el saneamiento del Río Bogotá,** y de otra parte la formulación y puesta en marcha del Plan Regional Bogotá – Cundinamarca, dentro de los lineamientos adecuados para el desarrollo sostenible. **Para impulsar el**

**cierre financiero del plan de inversión las partes suscribirán un nuevo convenio, tendiente a la creación de valor en la descontaminación en el Río Bogotá.**

- **“Papel de la –CAR-:** (fls.23-24 cuaderno No. 7 proyectos pacto de cumplimiento)

“Conforme con lo establecido en el Artículo 44 de la Ley 99 de 1993, la CAR, está en la obligación de **dedicar el 50% del producto correspondiente al recaudo del porcentaje del impuesto predial a gestión ambiental dentro del perímetro urbano de Bogotá**, precisando la disposición legal que “*Estos recursos se destinaran exclusivamente a inversión*”, dentro del marco legal **la CAR no auspicia, avala, o acompaña, ni se podría comprometer con el esquema de solución ambiental planteado por la Empresa de Acueducto y Alcantarillado de Bogotá, ya que los costos que demandan las obligaciones a cargo de la mencionada empresa se enjuagan con las tarifas y los recursos de la Ley 715 pueden solventar costos de las obras de infraestructura o pueden destinarse a subsidio de tarifas.**

“De otro lado, y con base en los documentos de trabajo utilizados, se demuestran los siguientes puntos:

-“En una *inversión a corto plazo*, se solucionaría el problema del Río Bogotá en su cuenca media, a través de **obras tales como la optimización y ampliación de la Planta del Salitre y la construcción de nuevos interceptores.**

-“La ausencia de esfuerzos adicionales se nota también en lo que le corresponde al Distrito, que contando con los recursos adicionales de la Ley 715 no los aplica en el porcentaje total al que está obligado para saneamiento. Adicionalmente, **el porcentaje aplicado de la Ley 715**

**sirve para amortiguar aumentos tarifarios que cubrirían costos de inversión y operación.**

**-“La solución propuesta entuba las aguas servidas de las cuales hace un vertimiento puntual al río, sin que se disponga de los estudios que permitan calcular y prever el impacto ambiental de tal solución, no solamente en el punto de vertimiento, sino en la cuenca baja.**

**-“La dilación de la construcción de la Planta de Tratamiento de Canoas,** representa un cambio en los esquemas de solución planteados por el Acueducto y el Distrito en la distintas presentaciones a cargo de Ernesto Guhl, Carlos Giraldo y Humberto Triana, que preveían una recuperación del río para el año 2012, y que sirvieron de base para que la CAR aceptara, en el documento firmado con el Alcalde, que compartía la solución propuesta por el Distrito.

**-“Aplanar la curva de inversión y dilatar la construcción de la Planta de Tratamiento de Canoas, pasa por convertir al Muña en laguna de oxidación.** La CAR no avala la utilización del Muña como laguna de oxidación para diferir la inversión en la Planta de canoas.

**-“La CAR desconoce los prediseños y diseños, así como los estudios ambientales,** que permitan establecer el impacto ambiental que producirían las obras propuestas en el Embalse del Muña.

**-“Para la CAR la Planta de Canoas se debe hacer de manera concomitante con la ejecución del interceptor Tunjuelito – Canoas.** Para la CAR es evidente que debe haber una coincidencia en el tiempo entre la terminación de los interceptores y la entrada en funcionamiento de la PTAR de Canoas, de otra forma, la solución técnica, sería viable para el Distrito pero no recomendable por las incertidumbres ambientales

para la cuenca baja del río que hace parte de nuestra territorio y que está bajo nuestra responsabilidad.

-“La CAR no puede someter a riesgos ambientales inciertos en su magnitud a la Cuenca Baja que eventualmente los padecería como consecuencia de un vertimiento puntual de las aguas residuales y la conversión del Muña en laguna de oxidación, no estando determinados los efectos de las descargas puntuales y los niveles de remoción que podría lograr la misma.

-“Dado el destino legal que los recursos de la CAR tienen y la distribución de competencias de la Ley 142, la CAR no puede pactar **que sus dineros sufraguen costos de inversión en obras como la construcción de interceptores, plantas elevadoras y demás elementos propios de la infraestructura de alcantarillado.**

“Por ultimo la CAR quiere fijar sus condiciones de auspicio a una solución técnica al problema del Río Bogotá: La solución debe ser a menor o igual tiempo a la prevista anteriormente y que determinó que la CAR firmara y comprometiera sus recursos al apoyo de la inversión en el proyecto de saneamiento, adelantado por el Distrito Capital, según consta en el Convenio 250.

**A continuación pasa a mencionar los Problema, Actores y Posibles Soluciones:** ( fls.25-27 cuaderno No. 7 proyectos pacto de cumplimiento)

- **“Cuenca Alta:**

| PROBLEMA                 | ACTOR      | SOLUCIÓN                                                                                  |
|--------------------------|------------|-------------------------------------------------------------------------------------------|
| Contaminación industrial | Curtidores | Conglomerado industrial por curtiembres. Especializado por actividades. Implementación de |

|                                                                |                               |                                                                                                                                                                                                        |
|----------------------------------------------------------------|-------------------------------|--------------------------------------------------------------------------------------------------------------------------------------------------------------------------------------------------------|
|                                                                |                               | tecnologías limpias                                                                                                                                                                                    |
| Alteración de los ecosistemas de páramo y ecosistemas boscosos | Papicultores                  | Recuperación de las zonas de páramo. Priorizar zonas de compra de páramos por parte de los municipios. Reforestación y concientización a las comunidades y gremios.                                    |
| Contaminación por aguas residuales domésticas                  | Municipio y comunidad         | Culminar cobertura de alcantarillado municipal, reutilización del agua proveniente de las PTAR, pretatamiento de aguas provenientes de las zonas rurales, participación de la comunidad y capacitación |
| Presión sobre aguas subterráneas                               | Floricultores                 | Implementación de sistemas de reutilización de aguas, implementación de tecnologías limpias.                                                                                                           |
| Alteración de los ecosistemas                                  | Ladrilleras                   | Reforestación y recuperación de las zonas de cantera utilizadas por los industriales.                                                                                                                  |
| Alteración de los ecosistemas                                  | Industrias explotación minera | Implementación de tecnología limpia                                                                                                                                                                    |
| Pérdida de Biodiversidad                                       | Explotación Forestal          | Implementación de mecanismos de explotación con criterios de sostenibilidad.                                                                                                                           |
| Urbanización de la Sabana                                      | Municipios y comunidad        | Mesa Regional                                                                                                                                                                                          |

• **Cuenca Media:**

| PROBLEMA                                      | ACTOR            | SOLUCIÓN                                                                                                                                                                                                                                                                                        |
|-----------------------------------------------|------------------|-------------------------------------------------------------------------------------------------------------------------------------------------------------------------------------------------------------------------------------------------------------------------------------------------|
| Contaminación por aguas residuales domésticas | Distrito Capital | Culminar cobertura de alcantarillado construcción de la solución para el tratamiento de las aguas residuales dentro del marco que el Distrito convenga con el concesionario dentro de los requerimientos ambientales establecidos para este caso, participación de la comunidad y capacitación. |

|                                                                  |                          |                                                                                                                                                                                                |
|------------------------------------------------------------------|--------------------------|------------------------------------------------------------------------------------------------------------------------------------------------------------------------------------------------|
| Contaminación industrial                                         | Industrias               | Implementación de tecnologías limpias, desarrollo de sistemas de tratamiento de aguas industriales                                                                                             |
| Sobre explotación del recurso hídrico subterráneo                | Agroindustrias           | Reutilización del agua proveniente de la PTAR, optimización del uso del recurso hídrico                                                                                                        |
| Aportes de sedimentos provenientes de la explotación de canteras | Mineros                  | Desarrollo de acueducto de las actividades cumpliendo con la normatividad ambiental                                                                                                            |
| Urbanización                                                     | Comunidad<br>Autoridades | Implementación de mecanismos que generen u control de la migración hacia el distrito y la ciudad y las poblaciones vecinas que municipales implica una mayor presión sobre el recurso hídrico. |
| Explotación Energética                                           | Emgesa – EEB             | Ampliación de la concepción de uso energético de la infraestructura a usos ambientales a efectos de aumentar la disponibilidad del recurso.                                                    |

• **Cuenca Baja:**

| PROBLEMA                                      | ACTOR                 | SOLUCIÓN                                                                                                                                              |
|-----------------------------------------------|-----------------------|-------------------------------------------------------------------------------------------------------------------------------------------------------|
| Escasez del recurso Hídrico                   | Cuencas superiores    | Descontaminación de la aguas provenientes de estas subcuencas, uso de efluentes de las PTAR                                                           |
| Contaminación por agroquímicos                | Agricultores          | Optimización del uso de agroquímicos, participación de la comunidad y capacitación                                                                    |
| Contaminación por aguas residuales domesticas | Municipio y comunidad | Culminar cobertura de alcantarillado municipal pretatamiento de aguas provenientes de las zonas rurales, participación de la comunidad y capacitación |
| Sobre explotación del recurso suelo           | Industria Ganadera    | Establecimiento de tecnología que permita delimitar la frontera agropecuaria                                                                          |

|              |                                |                                                              |
|--------------|--------------------------------|--------------------------------------------------------------|
| Urbanización | Municipios<br>y<br>comunidades | Control de la densificación y<br>crecimiento de la población |
|--------------|--------------------------------|--------------------------------------------------------------|

• Programas –CAR-

| CONVENIO       | AREA DE INFLUENCIA                                  | DESCRIPCIÓN DEL PROYECTO                                                                                                                                                                                                                                                                                                                                                                                                                                                                                                                                                                                                                                                                                                                                                                                                                   |
|----------------|-----------------------------------------------------|--------------------------------------------------------------------------------------------------------------------------------------------------------------------------------------------------------------------------------------------------------------------------------------------------------------------------------------------------------------------------------------------------------------------------------------------------------------------------------------------------------------------------------------------------------------------------------------------------------------------------------------------------------------------------------------------------------------------------------------------------------------------------------------------------------------------------------------------|
| CAR-Distrito   | Cuenca Media del Río Bogotá                         | <u>La Corporación seguirá aportando los recursos establecidos en el Parágrafo 2 del Artículo 44 de la Ley 99 de 1993 al proyecto de saneamiento de la cuenca media siguiendo las directrices de los estudios analizados por el Distrito.</u><br><i>inversión ambiental”</i>                                                                                                                                                                                                                                                                                                                                                                                                                                                                                                                                                                |
| Deuda BID      | Cuenca Alta y margen occidental del Río Bogotá      | La corporación seguirá sirviendo la deuda, correspondiente a los dos créditos adquiridos con el BID por concepto de los créditos para financiar la construcción de las PTAR. La deuda fue contraída en dólares y pagadera en dólares lo que genera una gran carga financiera para la Corporación asociada con la fluctuación del valor del dólar.                                                                                                                                                                                                                                                                                                                                                                                                                                                                                          |
| CAR-Municipios | Cuenca Alta y Media                                 | La contaminación del Río Bogotá, es generada por la concentración demográfica y económica del área, lo cual causa grandes costos sociales sobre la salud pública, el costo de tratamiento del agua, las limitaciones de la actividad agrícola, el uso intenso de las aguas subterráneas, la eutroficación y consecuente destrucción de humedales. <u>La CAR propone ampliar la capacidad y/o optimizar los sistemas de tratamiento de aguas residuales domesticas existentes a cargo de la jurisdicción.</u> Esta tarea comprende la ejecución de obras de ingeniería sanitaria y saneamiento ambiental en los municipios del área de jurisdicción de la CAR con el propósito de mejorar la calidad de las aguas de la Cuenca Alta y las condiciones ambientales de la región., <u>comprende la Operación y Mantenimiento de las PTAR.</u> |
| CAR            | Cuenca del Río Bogotá, conformada por 19 subcuencas | Dada la magnitud y la complejidad de la cuenca del Río Bogotá, <u>no se iniciará proceso de ordenación de toda la cuenca, sino que se ordenará las subcuencas que la conforman, sin perder de vista la cuenca total.</u> Para cada                                                                                                                                                                                                                                                                                                                                                                                                                                                                                                                                                                                                         |

|                                                             |                                |                                                                                                                                                                                                                                                                                                                                                                                                                                                                                                                                                                                                                                                                                  |
|-------------------------------------------------------------|--------------------------------|----------------------------------------------------------------------------------------------------------------------------------------------------------------------------------------------------------------------------------------------------------------------------------------------------------------------------------------------------------------------------------------------------------------------------------------------------------------------------------------------------------------------------------------------------------------------------------------------------------------------------------------------------------------------------------|
|                                                             |                                | subcuenca se debe seguir el procedimiento de el Decreto 1729 de 2003, los pasos son: Diagnostico, Prospectiva, Formulación, Ejecución y Seguimiento                                                                                                                                                                                                                                                                                                                                                                                                                                                                                                                              |
| CAR                                                         | Cuenca del Río                 | Para mejorar el control hidrológico y agilizar la operación de los embalses, se ha previsto automatizar la medición de caudales y las maniobras de apertura o cierre de válvulas de descarga, con sistemas Telemétricos que permitan el manejo en tiempo real. Para lo cual se compromete a la Operación, Mantenimiento permanente y Automatización del EMBALSE DEL SISGA Y NEUSA.                                                                                                                                                                                                                                                                                               |
| CAR-IDEAM                                                   | Toda la Jurisdicción de la CAR | Realizar un Diagnóstico del estado actual de los equipos mecánicos instalados en las estaciones que conforman la Red Hidrometeorológica, con el fin de seleccionar los equipos mecánicos que requieren ser reemplazados, analizar e identificar en cada subcuenca contemplada en la jurisdicción de la CAR las necesidades de información hidrometeorológica, con el fin de definir el número y las categorías de las estaciones, instalar estaciones telemétricas con el fin de evitar desastres e identificar los sitios donde se realizan vertimientos a las aguas del Río Bogotá y a sus afluentes para implementar gradualmente estaciones de monitoreo de calidad de agua. |
| CAR-Alcaldías-Comunidades-CREPAD-Fondo Nacional de Regalías | Cuenca del Río Bogotá          | Inicialmente el proyecto contempla la ejecución del levantamiento topográfico de las márgenes del Río en el sector de Suesca- Tocancipá, para identificar sectores críticos en cuanto a jarillones, compuertas y alteraciones por vegetación y sedimentos. Posteriormente, se proponen y ejecutan trabajos, conjuntamente con las Alcaldías y ribereños, para reducir la vulnerabilidad a la inundaciones. Como aporte a la continuidad del saneamiento ambiental, se ha proyectado la implementación de una red telemétrica para monitoreo de la calidad de agua del Río Bogotá, en los 10 puntos, desde Villapinzón hasta Girardot.                                            |
| Convenio No. 354 de diciembre 30 de 1999, CAR               | Cuenca Alta, Media y Baja      | Suministro y adecuación de terrenos para construcción y operación de un sistema de disposición de residuos sólidos en el sector de Mondoñedo del Departamento de Cundinamarca. El predio fue entregado a la                                                                                                                                                                                                                                                                                                                                                                                                                                                                      |

|                                 |                           |                                                                                                                                                                                                                                                                                                                                                                                      |
|---------------------------------|---------------------------|--------------------------------------------------------------------------------------------------------------------------------------------------------------------------------------------------------------------------------------------------------------------------------------------------------------------------------------------------------------------------------------|
| Gobernación-Municipio de Bojacá |                           | Gobernación mediante acta el 1 de noviembre de 2001, el contrato de concesión se otorgó al consorcio RELLENO SANITARIO NUEVO MONDOÑEDO y se firmó el 27 de diciembre de 2002, comprende los estudios y diseños, construcción y/o montaje, operación y mantenimiento, cierre, clausura y posclausura de las instalaciones del sistema de tratamiento y disposición final de residuos. |
| Cobro de tasa CAR               | Cuenca Alta, Media y Baja | En la actualidad la CAR tiene identificados en toda la jurisdicción 491 usuarios los cuales están representados por los entes territoriales, sector curtiembres, industrias, manufacturera, sector porcícola, avícola entre otros                                                                                                                                                    |

Pasa en seguida a señalar unas **Reglas de Gobierno:** (fl. 41 cuaderno No. 7 proyectos de pacto de cumplimiento), para lo cual parte de la base de cada una de las acciones concretas de saneamiento que tienen un alto grado de certeza, en un horizonte de tiempo muy definido, así:

**CUENCA ALTA**

| MUNICIPIO                            | ACCION                                                          | OBLIGADO                                              |
|--------------------------------------|-----------------------------------------------------------------|-------------------------------------------------------|
| Villapinzón y Chocontá               | Recuperación Ronda del Río                                      | Municipio<br>CAR<br>Curtidores                        |
|                                      | Recuperación del páramo                                         | Municipio<br>Gobernación<br>Agricultores<br>Ganaderos |
|                                      | Reubicación de los curtidores                                   | Gobernación<br>CAR<br>Municipio<br>Curtidores         |
|                                      | Planta de Cromo                                                 | Gobernación<br>CAR<br>Municipio<br>Curtidores         |
| Municipios de la cuenca alta y media | Optimización de los sistemas de tratamiento de aguas residuales | CAR<br>Municipios                                     |

|             |                                                                           |                |
|-------------|---------------------------------------------------------------------------|----------------|
|             | existentes                                                                |                |
| Cota y Chía | Ampliación de la capacidad de tratamiento de la infraestructura existente | CAR Municipios |

**CUENCA MEDIA:**

|        |                                                                                                                                                                                                                                                                                                                                                                                                                                                                    |
|--------|--------------------------------------------------------------------------------------------------------------------------------------------------------------------------------------------------------------------------------------------------------------------------------------------------------------------------------------------------------------------------------------------------------------------------------------------------------------------|
| Bogotá | La CAR expresa su voluntad de seguir apoyando dentro de los términos del parágrafo 2° del Artículo 44 de la Ley 99 la gestión de saneamiento ambiental. Lo anterior, exige, de terminarse el Contrato de Concesión 250 que tenía como objeto el saneamiento del río Bogotá, la realización de un convenio interadministrativo que determine claramente las obligaciones a su cargo, la forma en que se manejan y ejecutan los recursos y el proyecto que se apoya. |
|--------|--------------------------------------------------------------------------------------------------------------------------------------------------------------------------------------------------------------------------------------------------------------------------------------------------------------------------------------------------------------------------------------------------------------------------------------------------------------------|

A continuación pone de presente las siguientes reglas de Gobierno: (fl. 44 c. No. 7 pactos de cumplimiento), que se resumen así:

- Las responsabilidades del comité de verificación.
- La creación de un plenario en el que participen todos los actores involucrados en la solución al saneamientos del Río Bogotá en que se discutan y tomen las medidas que le corresponden a los diferentes participantes, conforme con la evolución técnica – financiera, **dentro de las condiciones que fije el pacto o en su defecto la sentencia.**
- La generación de un órgano ejecutivo del plenario que tenga a su cargo la constante actualización técnica y financiera de la solución, que

presentará cuando existan modificaciones sustanciales a las tareas a cargo de cada uno de los actores.

- **Ante la ausencia de acuerdo en el plenario o discrepancias en el órgano ejecutivo, el Tribunal conocerá y resolverá la diferencia planteada**, en desarrollo de la obligación judicial de velar por el cumplimiento de la sentencia o del pacto, según sea el caso.

En el pacto o la sentencia se desarrollarán a través de fases concluidas las cuales habrá por parte del comité de verificación y del órgano ejecutivo del plenario una evaluación de resultados y de perspectivas para la fase siguiente. El informe será presentado al plenario para que asuma los resultados obtenidos y las tareas por realizar.

Dando cumplimiento al requerimiento que durante las mesas de trabajo le hiciera la Magistrado Sustanciadora aporta un listado de las industrias que vierten sus aguas residuales al Río Bogotá en el área de su competencia (fls. 45 a 48) y anexa el inventario ambiental de algunas de las que relaciona, como también de las plantas de beneficio de algunos municipios que corresponden a la Oficina Territorial de la Sabana Norte y Almeidas (fls. 50 a 88). De igual manera lo hace respecto de los vertimientos industriales comprendidos dentro de la Oficina Territorial de la Sabana Occidente (fls. 59 a 104).

En documento posterior y para efectos de la presentación durante la audiencia de discusión para aprobación de los pactos por las partes intervinientes en los diferentes procesos acumulados, la CAR incluye los puntos materia de su Propuesta de Pacto Inicial y adiciona otros (ver cuaderno para presentación en audiencia en el programa de Windows Power Point), entre los que se destacan algunos, así:

## LINEAMIENTOS:

- Los acueductos y alcantarillados no requieren licencia ambiental.
- La licencia Ambiental para la construcción y operación de sistemas de tratamiento de aguas residuales sólo aplica para poblaciones iguales o superiores a 200.000 habitantes (Art. 9, D. 1180/2003).
- La CAR se fundamenta en los principios de eficacia, eficiencia y economía para viabilidad de cualquier proyecto o actividad que requiera su aprobación o patrocinio.
- Se refiere a las obligaciones que contraen las partes (Cofinanciador –fl. 8- y del Cofinanciado –fl. 9-) en los Convenios de Cofinanciación

## CONTINGENCIAS

### **Financieras:**

- Los costos del saneamiento se realizan en dólares mientras que los ingresos en pesos.
- Los ingresos están calculados sobre: Ley 715, tarifas, predial y las tasas (de las que indica la tendencia presente a su mantenimiento, no a su incremento).
- La devaluación es constante y tiende a aumentarse.

- La previsión indica la necesidad de hacer cálculos de imprevistos para evitar un desfase financiero del proyecto.

#### **Demográficas:**

- Se indica que la solución está pensada con crecimientos demográficos que son aleatorios, si no se implantan y cumplen macro políticas que tiendan a: Estimular ciudades satélites (Tunja, Villavicencio, Ibagué) que dispersen la presión demográfica, a evitar la conurbanización de la Sabana, pues con ello se aumentaría la presión sobre el río; a evitar la transformación de la vida rural en vida urbana –ciudades dormitorio- que aumentarían las presiones municipales sin respaldos de recursos para solventar la demanda marginal que el aumento poblacional representa.

#### **Tecnológicas:**

- *Desde lo positivo:* El problema del agua y del saneamiento son problemas de punta de la humanidad; la presión sobre el recurso hídrico disminuye en la medida en que aparezcan nuevas tecnologías que permitan su reutilización; tendencia a investigar medios eficientes, eficaces y económicos para el tratamiento del agua.
- *Desde lo negativo:* Los Sistemas de tratamiento tienen una vida útil que obliga a su actualización y mantenimiento y que generan una contingencia no calculada; la necesidad de contar con sistemas alternativos de relevo:

### **Institucionales:**

- *Reparto de roles:* Las entidades territoriales asumieron muchas de las competencias que correspondían al Gobierno Nacional (C.N.); existe una tendencia de regreso al sistema anterior; la estructura y objeto de las CAR es objeto de revisión.
- *Regulación:* Las tarifas constituyen el apoyo financiero al saneamiento en cuanto éste constituye un sistema complementario al alcantarillado, empero son objeto de regulación por la CRA y existe una tendencia drástica a su reducción porque la señal reguladora apunta hacia la optimación de la gestión con lo cual los ahorros logrados permiten enjugar los compromisos (no traslado de la ineficiencia a los usuarios).

### **Tiempo:**

- Hay una relación directamente proporcional entre la contingencia y el tiempo.

### **Perversidad de las tarifas:**

- Las tarifas no son reales por estar subsidiadas; la Ley 715 se dirige al subsidio de tarifas; los subsidios los soportan los estratos altos, con lo que una estrangulación de la base de soporte, genera una descompensación del subsidio.

### **Vulnerabilidad del Sistema:**

- Aumento Poblacional; Vertimientos no compatibles con el diseño; Caudal de Diseño entre 10 y 20 años en condiciones normales de operación y mantenimiento.

Se indica más adelante que la solución de saneamiento del río tiene como actualidad jurídica el esquema que se incorporó tanto en el POT (del cual la revisión no ha sido adoptada) como en el Contrato de Concesión 015, y se aduce que **no se podría subrogar la responsabilidad en el Pacto o en la sentencia** (fl. 28): Se agrega que la CAR tiene que invertir el 50% de lo que recibe como parte del predial (15% del recaudo) en gestión ambiental, en el rubro de inversión, en el territorio distrital y que los aportes de la CAR y sus rendimientos financieros, pagan el rubro de inversión que demandó la PTAR del Salitre, respecto de la cual el Convenio 250 por cumplimiento del objeto terminó (fl. 29).

Se anota que para que la CAR continúe apoyando el saneamiento del río -como es su intención-, se requiere firmar un nuevo convenio que defina al menos las siguientes condiciones: Proyecto objeto de apoyo; Condiciones del apoyo; Administración de los recursos; Ejecución de los recursos (fl. 30).

Por lo anterior, propone que de acuerdo con lo que se discutió en las mesas de trabajo que son el antecedente del proyecto de 6 de agosto, el Distrito debe pactar un nuevo convenio en el que la solución planteada debe reunir: cierre financiero; certeza sobre la propiedad de la infraestructura construida y los productos; mejor o igual calidad del efluente; menor o igual tiempo para la solución; menor o igual costo (fl. 31).

PACTO DE LOS MINISTERIOS E IDEAM

6.7.9. MINISTERIOS

**Ministerio de Agricultura y Desarrollo Rural** (fls. 14 a 95 del Cuaderno No. 1 Pactos de Cumplimiento)

El Ministerio de Agricultura y Desarrollo Rural presenta proyectos tendientes a la difusión y capacitación que puedan servir de apoyo a los propósitos de la presente acción popular, advirtiéndolo siguiente:

*“...Debo insistir en que el Ministerio de Agricultura y Desarrollo Rural de acuerdo con sus funciones **no puede intervenir directamente en la recuperación ecológica y ambiental del Río Bogotá**; no obstante puede constituirse en un soporte para el Ministerio de Ambiente, Vivienda y Desarrollo Territorial, así como para la CAR en el desarrollo de las funciones que les atañen y que tengan que ver con los hechos de la acción que ahora nos ocupa”*

Acciones emprendidas por el Ministerio de Agricultura y Desarrollo Rural para contribuir a la disminución del impacto ambiental generado por el sector agrícola:

| OBRA / PLAN                                                                                                                                                                                          | CORTO PLAZO<br>(Hasta 5 años) | MEDIANO PLAZO<br>(De 5 a 10 años) | LARGO PLAZO<br>(Desde 10 años) |
|------------------------------------------------------------------------------------------------------------------------------------------------------------------------------------------------------|-------------------------------|-----------------------------------|--------------------------------|
| Formular el Componente de Sostenibilidad Ambiental en la Política Agropecuaria.                                                                                                                      | X                             |                                   |                                |
| Conservación de los recursos hídricos de la cuenca del Río Bogotá a través de adecuaciones de tierra.                                                                                                | X                             |                                   |                                |
| Apoyar la conservación de los recursos forestales de la cuenca del Río Bogotá a través de la cadena forestal, utilizando el Certificado e Incentivo Forestal (CIF) y a través del apoyo de proyectos | X                             |                                   |                                |

|                                                                                                                                    |   |  |  |
|------------------------------------------------------------------------------------------------------------------------------------|---|--|--|
| silvopastoriles.                                                                                                                   |   |  |  |
| Impulsar los Sistemas Alternativos Agropecuarios como la agricultura ecológica y la producción limpia en la Cuenca del Río Bogotá. | X |  |  |
| Difusión y capacitación de tecnologías para la descontaminación del Río Bogotá.                                                    | X |  |  |

**Ministerio de Hacienda y Crédito Público** (fls. 637 a 639 del Cuaderno No. 2, Pactos de Cumplimiento)

El Ministerio de Hacienda y Crédito Público se abstuvo de presentar propuesta de pacto de cumplimiento por las siguientes razones:

*“...La solución de recursos económicos para atender tan grave problema, no se encuentra en esta entidad, toda vez que los recursos del Distrito Capital de Bogotá y demás entes territoriales destinados al manejo ambiental de la Cuenca del Río Bogotá no forman parte del presupuesto del MINISTERIO DE HACIENDA Y CRÉDITO PÚBLICO.”*

**Ministerio de Ambiente, Vivienda y Desarrollo Territorial:** (Cuaderno Anexo de Pactos de Cumplimiento)

|                                                                                                                                   | <b>CORTO PLAZO</b><br>(Hasta 5 años) | <b>MEDIANO PLAZO</b><br>(De 5 a 10 años) | <b>LARGO PLAZO</b><br>(Más de 10 años) |
|-----------------------------------------------------------------------------------------------------------------------------------|--------------------------------------|------------------------------------------|----------------------------------------|
| <b>OBRAS / PLANES</b>                                                                                                             |                                      |                                          |                                        |
| <b>I. PRIMERA PROPUESTA</b>                                                                                                       |                                      |                                          |                                        |
| <b><i>1.- Acciones Misionales.-</i></b>                                                                                           |                                      |                                          |                                        |
| 1.1.- Seguimiento a la licencia ambiental del Programa de Descontaminación del Río Bogotá con énfasis en el control, seguimiento, |                                      |                                          |                                        |

|                                                                                                                                                                                                                                                                                                                                                                                                                                                              |   |  |   |
|--------------------------------------------------------------------------------------------------------------------------------------------------------------------------------------------------------------------------------------------------------------------------------------------------------------------------------------------------------------------------------------------------------------------------------------------------------------|---|--|---|
| evaluación del programa de control de efluentes industriales adelantado por el Distrito Capital y de los subproductos generados en la PTAR – SALITRE.                                                                                                                                                                                                                                                                                                        |   |  | X |
| 1.2.- En el caso de ser necesario la modificación de la Licencia Ambiental por parte del Distrito Capital, el MAVDT dará prioridad a la evaluación y pronunciamiento sobre su viabilidad.                                                                                                                                                                                                                                                                    |   |  | X |
| <b>2.- Asistencia Técnica a los Municipios de la cuenca del Río Bogotá en el fortalecimiento de programas y consolidación de proyectos de manejo de aguas residuales.</b>                                                                                                                                                                                                                                                                                    |   |  |   |
| 2.1.- En desarrollo de la asistencia técnica para la prestación eficiente de los servicios públicos domiciliarios propone: El diseño del esquema más apropiados de prestación de los servicios; suministro de herramientas, previa evaluación técnica, y viabilidad de los planes de obra e inversiones que incluyen el manejo y tratamiento de las aguas residuales e identificación de las fuentes de financiación para llevar a cabo los planes de obras. | X |  |   |
| 2.2.- Fomento para la optimización de Sistemas de Tratamiento de Aguas Residuales -PTAR- construídos.                                                                                                                                                                                                                                                                                                                                                        | X |  |   |
| <b>3.- Orientación de los procesos de ordenamiento territorial de los municipios pertenecientes a la cuenca del Río Bogotá.</b>                                                                                                                                                                                                                                                                                                                              |   |  |   |
| El MAVDT prestará la asistencia técnica en las diferentes instancias en las que se encuentre los Planes de Ordenamiento Territorial de los Municipios localizados en la Cuenca del Río Bogotá, específicamente en:                                                                                                                                                                                                                                           |   |  |   |
| 3.1.- Apoyo a municipios que no han                                                                                                                                                                                                                                                                                                                                                                                                                          | X |  |   |

|                                                                                                                                                            |   |  |  |
|------------------------------------------------------------------------------------------------------------------------------------------------------------|---|--|--|
| formulado su POT.                                                                                                                                          | X |  |  |
| 3.2.- Apoyo a municipios que requieren ajustar su POT.                                                                                                     |   |  |  |
| <b>4.- Formulación de Convenios de Producción Limpia.-</b>                                                                                                 |   |  |  |
| Principalmente se desarrollará ésta actividad para los sectores de las curtiembres y actividades de sacrificio a través de las siguientes acciones:        | X |  |  |
| 4.1.- Fortalecimiento de los Convenios de Producción más limpia haciendo uso de mecanismos o instrumentos que permitan la obtención de mejores resultados. | X |  |  |
| 4.2.- Apoyo a la conformación de agremiaciones de sectores productivos mediante el estímulo en la conformación de agremiaciones en sectores productivos.   |   |  |  |

|                                                                                                                                                                                                                      |   |  |  |
|----------------------------------------------------------------------------------------------------------------------------------------------------------------------------------------------------------------------|---|--|--|
| <b>II. SEGUNDA PROPUESTA</b>                                                                                                                                                                                         |   |  |  |
| <b><i>2.- Apoyo en la gestión para la consecución de recursos económicos para programas y proyectos de descontaminación del Río Bogotá.-</i></b>                                                                     |   |  |  |
| 2.1.- El MAVDT se compromete a adelantar los trámites pertinentes ante las entidades nacionales competentes para el otorgamiento de créditos internacionales.                                                        | X |  |  |
| 2.2.- Viabilización de proyectos ante el Fondo Nacional de Regalías con el fin de incentivar a las entidades territoriales, así:                                                                                     | X |  |  |
| 2.2.1.- Capacitación para la formulación de proyectos de manejo y tratamiento de aguas residuales.                                                                                                                   | X |  |  |
| 2.2.2.- Evaluación técnica y financiera de Proyectos presentados ante el FNR.                                                                                                                                        | X |  |  |
| 2.3.- Incentivos Tributarios:                                                                                                                                                                                        |   |  |  |
| 2.3.1.- Fomento en la presentación de proyectos que potencialmente pueden acceder a exención. Lo anterior, mediante un programa de capacitación a los Municipios ubicados en la Cuenca del Río Bogotá.               | X |  |  |
| 2.3.2.- Certificación exención del IVA. Se brindará, prestando atención especial a los proyectos que tengan relación directa con la recuperación de la Cuenca del Río Bogotá y que cumplan con todos los requisitos. | X |  |  |

|                                                                                                                                                                                                                                                                                                                                                                                                                                                                                                                                                                                                                                                                                                                                                                                                                                                                                                |                            |  |  |
|------------------------------------------------------------------------------------------------------------------------------------------------------------------------------------------------------------------------------------------------------------------------------------------------------------------------------------------------------------------------------------------------------------------------------------------------------------------------------------------------------------------------------------------------------------------------------------------------------------------------------------------------------------------------------------------------------------------------------------------------------------------------------------------------------------------------------------------------------------------------------------------------|----------------------------|--|--|
| <p><b>III. TERCERA PROPUESTA</b></p> <p><b>3.- Consolidación de políticas y directrices nacionales que contribuyan a construir los escenarios de participación de los actores involucrados en la descontaminación del Río Bogotá.</b></p> <p><b>3.1.-</b> Asistencia a mesas de coordinación y evaluación de alternativas para la descontaminación de la cuenca del Río Bogotá.</p> <p>3.2.- Fomento a la creación de Consejo de Cuenca para el Río Bogotá para la búsqueda de la consolidación e integración de las iniciativas y recursos, en pro de la reducción de los impactos contaminantes sobre el río y sus afluentes.</p> <p>3.3.- Impulso a la formulación y desarrollo de un Plan Nacional de Manejo de Aguas Residuales.</p> <p>Esto permitirá priorizar la gestión para el manejo de A. R. en Colombia, en aquellas áreas hidrográficas más críticas como la cuenca del río.</p> | <p>X</p> <p>X</p> <p>X</p> |  |  |
|------------------------------------------------------------------------------------------------------------------------------------------------------------------------------------------------------------------------------------------------------------------------------------------------------------------------------------------------------------------------------------------------------------------------------------------------------------------------------------------------------------------------------------------------------------------------------------------------------------------------------------------------------------------------------------------------------------------------------------------------------------------------------------------------------------------------------------------------------------------------------------------------|----------------------------|--|--|

Ministerio de Minas y Energía: (fls. 644 a 651 del cuaderno No. 2)

| OBRAS / PLANES                                                                                                                                                                                                   | CORTO PLAZO<br>(Hasta 5 años) | MEDIANO PLAZO<br>(De 5 a 10 años) | LARGO PLAZO<br>(Más de 10 años) |
|------------------------------------------------------------------------------------------------------------------------------------------------------------------------------------------------------------------|-------------------------------|-----------------------------------|---------------------------------|
| Propender porque las actividades que desarrollen las empresas del sector minero energético garanticen el desarrollo sostenible de los recursos naturales, especialmente en el área de influencia del Río Bogotá. |                               |                                   | X                               |
| Modificar o adicionar la Resolución No. 222 de 1999 junto con el Ministerio de Medio Ambiente, Vivienda y Desarrollo Territorial. <sup>39</sup>                                                                  | X                             |                                   |                                 |
| Conjuntamente con el MAVDT continuará trabajando la agenda sobre temas minero-energéticos, con el fin de lograr el desarrollo de las actividades del sector de manera sostenible ambientalmente.                 |                               |                                   | X                               |
| Como miembro de la Comisión Nacional de Regalías, velará por que se dé estricto cumplimiento al numeral 3 del artículo 7º de la ley 756 de 2002.                                                                 |                               |                                   | X                               |

Ministerio de Comercio, Industria y Turismo

“El día 4 de septiembre de 2003, fueron radicadas en el Ministerio de Comercio, Industria y Turismo, el comunicado Núm. 03-1852, mediante el cual la Sección Cuarta del Honorable Tribunal Administrativo de Cundinamarca me cita a la audiencia especial de pacto de cumplimiento (continuación) conforme con lo dispuesto por la Ley 472 de 1998”.

<sup>39</sup> Mediante esta resolución se determinaron las zonas compatibles para las explotaciones mineras de materiales de construcción en la Sabana de Bogotá y se dictaron otras disposiciones. Dicho proyecto se realizará en dos planes: La creación de parques minero ambientales, los cuales deberán ser incluidos en el Plan de Ordenamiento Territorial de Bogotá y con la creación de nuevas zonas compatibles para realizar la actividad minera en la Sabana de Bogotá.

*“De conformidad con lo establecido por la Ley 790 de 2002 y los Decretos Ley 210 y 216 de 2003, el Ministerio de Desarrollo Económico, fué fusionado con el Ministerio de Comercio Exterior, conformándose el Ministerio de Comercio, Industria y Turismo. De igual forma, con lo relacionado a la formulación de políticas relativas al uso del suelo y de ordenamiento Urbano, agua potable y saneamiento básico y desarrollo territorial y urbano, así como la política habitacional integral necesaria para dar cumplimiento al artículo 51 de la Constitución Política, pasaron a ser funciones, del Ministerio de Ambiente, Vivienda y Desarrollo Territorial.*

*“Por lo anterior, y de acuerdo al tema y órbita de competencia legal, cláusula de máxima legalidad, no es posible, que este Ministerio pueda pronunciarse –en cualquier sentido- en la audiencia especial de pacto de cumplimiento, pues no tiene competencia para tal efecto y por lo mismo, no tengo poder para seguir actuando en dicho proceso. Por lo tanto, y de acuerdo a las disposiciones legales citadas anteriormente, este proceso ha venido siendo atendido por el Organismo competente que para el efecto que ha realizado las actuaciones necesarias para la defensa de los intereses de la Nación, por tal motivo, respetuosamente le solicito, remitir estas comunicaciones a dicho Ministerio.”*

**Ministerio de Educación Nacional** (Cuaderno anexo, Pactos de Cumplimiento)

| OBRAS / PLANES                                                                                                                       | CORTO PLAZO<br>(Hasta 5 años) | MEDIANO PLAZO<br>(De 5 a 10 años) | LARGO PLAZO<br>(Desde 10 años) |
|--------------------------------------------------------------------------------------------------------------------------------------|-------------------------------|-----------------------------------|--------------------------------|
| Asesorar en materia de educación ambiental a las Secretarías de Educación de Cundinamarca y al Distrito Capital para la capacitación |                               |                                   |                                |

|                                                                                                                                                                                                                   |   |  |  |
|-------------------------------------------------------------------------------------------------------------------------------------------------------------------------------------------------------------------|---|--|--|
| que deben dar a gerentes de CADEL, rectores y coordinadores de las Instituciones Educativas comprometidas con la búsqueda de soluciones a la problemática del Río Bogotá.                                         | X |  |  |
| Instalación de Proyectos Ambientales Escolares en instituciones educativas directamente asociadas con la problemática del Río Bogotá.                                                                             | X |  |  |
| Coordinación con las Secretarías de Educación de Cundinamarca y Bogotá en el fortalecimiento de la capacidad institucional para la incorporación del proyecto “Educación Ambiental y Problemática del Río Bogotá” | X |  |  |

**Ministerio De La Protección Social** (Cuaderno Anexo, Pacto de Cumplimiento)

| OBRA / PLANES                                                                                                                                            | CORTO PLAZO<br>(Hasta 5 años) | MEDIANO PLAZO<br>(De 5 a 10 años) | LARGO PLAZO<br>(Más de 10 años) |
|----------------------------------------------------------------------------------------------------------------------------------------------------------|-------------------------------|-----------------------------------|---------------------------------|
| Inspección, vigilancia y control de los establecimientos de mayor riesgo químico en salud pública con el fin de evitar efectos adversos en la comunidad. | X                             | X                                 | X                               |
| Vigilar y controlar las curtiembres ubicadas en la zona de San Benito, localidad de Tunjuelito.                                                          | X                             | X                                 | X                               |
| Vigilar y controlar las plazas de mercado frente a la generación de residuos sólidos y líquidos.                                                         | X                             | X                                 | X                               |
| Vigilancia de Control de Plantas de beneficio Aviar.                                                                                                     | X                             | X                                 | X                               |
| Inspección, vigilancia y control de                                                                                                                      |                               |                                   |                                 |

|                                                                                                                            |   |   |   |
|----------------------------------------------------------------------------------------------------------------------------|---|---|---|
| plantas de sacrificio de bovinos y porcinos.                                                                               | X | X | X |
| Vigilancia y control de famas en el Distrito Capital.                                                                      | X | X | X |
| Vigilar y controlar el relleno sanitario de Doña Juana.                                                                    | X | X | X |
| Realizar el control integrado de focos de residuos sólidos, líquidos y vectores.                                           | X | X | X |
| Intensificación de la Vigilancia en Salud Pública de los efectos adversos en la salud por la contaminación del Río Bogotá. | X | X | X |
| Desarrollar proyecto de vigilancia centinela de necesidades sentidas y observadas de la comunidad aledaña al Río.          | X | X | X |
| Sensibilizar y capacitar a la comunidad aledaña a la ronda del Río Bogotá.                                                 | X | X | X |

6.7.10. Instituto de Hidrología, Meteorología y Estudios Ambientales, “IDEAM” (fls. 458 a 462 del cuaderno No. 1)

| OBRA / PLANES                                                                                                                                                                                                  | CORTO PLAZO<br>(Hasta 5 años) | MEDIANO PLAZO<br>(De 5 a 10 años) | LARGO PLAZO<br>(Más de 10 años) |
|----------------------------------------------------------------------------------------------------------------------------------------------------------------------------------------------------------------|-------------------------------|-----------------------------------|---------------------------------|
| Apoyar científicamente y técnicamente los estudios que se consideren necesarios dentro del marco de su competencia, teniendo en cuenta la jurisdicción y competencia de la CAR y demás entidades involucradas. |                               |                                   | X                               |
| Disposición para suscribir convenios especiales de cooperación con las demás entidades.                                                                                                                        |                               |                                   | X                               |

6.7.11. Asociación de Municipios de Sabana Centro - Asocentro  
(Cuaderno anexo, Pactos de Cumplimiento)

| OBRAS / PLANES                                                                                                                                                                                                              | CORTO PLAZO<br>(Hasta 5 años) | MEDIANO PLAZO<br>(De 5 a 10 años) | LARGO PLAZO<br>(Desde 10 años) |
|-----------------------------------------------------------------------------------------------------------------------------------------------------------------------------------------------------------------------------|-------------------------------|-----------------------------------|--------------------------------|
| Con la Planta de Asfalto se utiliza agua para el enfriamiento de la tubería y ésta es reutilizada y pasa por una planta de lodos los cuales pasan a una planta de tratamiento de secado. - <i>Actualmente en ejecución.</i> |                               |                                   |                                |
| Instalación y reposición de la cubierta de la planta de asfalto, para evitar que el material asfáltico sea arrastrado.                                                                                                      | X                             |                                   |                                |
| Realización y limpieza controlada de una trampa de grasas para eliminar posibles residuos de aceites a las corrientes superficiales.                                                                                        | X                             |                                   |                                |

6.7.13. COMENTARIOS DE LOS ACCIONANTES Y DE LOS COADYUVANTES A LOS DIFERENTES PACTOS DE CUMPLIMIENTO PRESENTADOS POR LOS DEMANDADOS.

**Alfonso Pérez Preciado** (fls. 746 y 747 del Cuaderno No. 2 de Pactos de Cumplimiento)

No acepta compromisos de ninguno de los actores que pretermitan normas legales y procesos administrativos instituidos y vigentes.

Ordenar al distrito Capital y/o a sus organismos competentes que cualquier modificación al sistema de tratamiento vigente de sus aguas residuales debe ser conforme con los procedimientos establecidos por la ley.

Ordenar al Distrito Capital que para el ejercicio de funciones en materia ambiental, los cambios futuros no impliquen la reducción de las metas de eficiencia del tratamiento ni los cronogramas de las plantas de tratamiento.

Ordenar al Distrito Capital para que en uso de sus facultades constitucionales, cobre el servicio público domiciliario de tratamiento de aguas residuales como recuperación a los servicios que le prestan a los usuarios del alcantarillado.

Ordenar al Distrito Capital para que en uso de sus facultades constitucionales, cobre el servicio público domiciliario de tratamiento de aguas residuales como recuperación a los servicios que presta a los usuarios del alcantarillado.

Llamar la atención al Director de la CAR, en el sentido de no extralimitar sus funciones, al aprobar por medio de un acuerdo con el Distrito Capital, una modificación de la licencia ambiental otorgada por el MAVDT para aceptar un programa con menores especificaciones técnicas y de menor eficiencia impuestas al Distrito.

Ordenar a la Alcaldía Mayor del Distrito Capital, a la Secretaría de Hacienda, y/o a la Empresa de Acueducto y Alcantarillado de Bogotá, integrar a la tarifa el cobro del servicio de Tratamiento de Aguas Residuales por formar parte del servicio de alcantarillado. Esto se hará en los términos de la Ley 142 de 1994, descontando de la misma financiación que sea posible obtener con cargo a la sobretasa predial CAR, a las tasas retributivas y a otras posibles fuentes para financiar el sistema de tratamiento de aguas residuales del Distrito Capital.

#### 6.8. DE LA SOLUCIÓN TÉCNICA INTEGRAL DE LA CUENCA DEL RÍO BOGOTÁ.

6.8.1. Implica no sólo la de la cuenca del río sino la de las quebradas y ríos que son afluentes del mismo, lo que pone de presente la necesidad de implementar planes, programas y proyectos de protección y recuperación de los nacimientos de ríos y quebradas, controlar el uso del recurso en toda la cuenca y armonizar los criterios para el manejo de la zona de ronda del río Bogotá.

6.8.2. Igualmente, para la solución técnica integral de la CUENCA ALTA se ha encontrado que el principal problema está relacionado con el rezago en la cobertura de alcantarillado de los municipios, de tal manera que a pesar de encontrarse construida parte importante de la infraestructura de tratamiento, ésta no funciona adecuadamente, ya que una porción importante, cercana al 70%, de las aguas residuales no llegan a las plantas instaladas por la CAR para ser tratadas. En consecuencia, es imprescindible construir los sistemas faltantes de alcantarillado en los municipios de la CUENCA ALTA, en tanto que en la CUENCA MEDIA es necesaria la terminación de la infraestructura troncal de alcantarillado y completar los sistemas de tratamiento.

6.8.3. En efecto, si bien es cierto que se podría dar una solución parcial al problema de contaminación con la construcción de las restantes plantas de tratamiento de la cuenca media, los antecedentes muestran que los estudios realizados son prueba de las condiciones de contaminación de la cuenca alta, que han alcanzado niveles preocupantes, los cuales son determinantes para la asimilación aguas abajo, a tal punto que en épocas de caudales medios y bajos en el río ya no existe presencia de oxígeno en el agua. Esta situación se ve agravada por los relativos bajos caudales del río Bogotá y la enorme presión sobre este recurso ejercida por los diferentes usuarios, tales como los distritos de riego localizados a lo largo de todo su recorrido, poblaciones que utilizan el río como fuente de abastecimiento de agua potable y para la generación de energía, etc.

6.8.4. Por ello, se requiere, además, de un modelo definido que contemple el uso del agua tratada de las plantas de tratamiento desde el punto de vista económico, como una posible fuente de financiación para el proyecto, pero principalmente, que busque el aprovechamiento de este recurso en usos tales como distritos de riego y el manejo de la oferta del agua para la región.

6.8.5. Los estudios de la Unión Temporal, como las investigaciones realizadas por la Universidad de los Andes, los Estudios de la firma HVM Ingenieros y del consultor CARLOS ALBERTO GIRALDO LOPEZ, no contradichos con prueba documental, o pericial aportada por las autoridades ambientales, para la Sala constituyen el modelo discutido en la Mesa de Planificación Regional que la EAAB pone de presente en su escrito de pacto, afirmación tampoco controvertida, sobre los usos del agua, que también fue objeto de análisis por los técnicos de las entidades que participaron en la MESA PARA LA SOLUCIÓN O SISTEMA INTEGRAL DE SANEAMIENTO DEL RÍO BOGOTÁ presidida por la Magistrada Sustanciadora con la intervención del técnico asesor de la Procuraduría Delegada Para Asuntos Ambientales, ingeniero civil, con especialización en medio ambiente y maestría en ingeniería civil, conocedor del tema CARLOS ALBERTO ECHEVERRY ARCINIEGAS, quien para los efectos de esta acción asesora en la materia técnica y ambiental al doctor JOSÉ ALBERTO GARCÍA CORTES, Procurador Tercero Judicial Administrativo que viene interviniendo en este proceso, de todo lo cual da cuenta su escrito de 27 de febrero que obra en los folios 4653 a 4683 del cuaderno 8 del cuaderno principal.

6.8.6. De esa mesa se destacan los acuerdos sobre los siguientes aspectos técnicos a tener en cuenta en la descontaminación del RÍO BOGOTÁ Y SUS AFLUENTES:

- Bogotá no es responsable de la cuenca alta.
- La CAR se compromete a entregar los caudales y la calidad afluente al Río Bogotá por cuencas y por municipios.
- Se conviene que los datos de población utilizados para todas las proyecciones sea la presentada en la mesa de planeación departamental, que es la misma utilizada por el Acueducto.
- Es importante involucrar a la CAR y dejar claro a la Magistrada que existe un vacío regulatorio en tarifas v.g. tasas retributivas.
- La tarifa actual de tratamiento no es real por una disfunción de responsabilidades en las entidades distritales (DAMA – Acueducto)
- Se preguntan si la Nación debe ser involucrada en inversión y/o operación de la PTAR? **Se responde que debe ser resuelto por el tribunal en la sentencia.**
- Hasta que las plantas estén operando eficientemente y los sistemas de tratamiento estén completamente contruidos, la CAR debe operar las PTAR. Después pueden ser trasladadas a los municipios.
- Recuperación hidráulica por medio de la compra de predios (b). Mitigación de inundaciones (jarillones) corresponden a proyectos independientes de programas de saneamiento al río.
- Los beneficios del dragado propuesto por HE Ingenieros, se traducen en la remoción de carga orgánica en los lodos béticos y que consumen oxígeno de la corriente.

Se presenta el modelo de calidad del agua del río Bogotá, así como la modelación del agua en interceptores.

- El pacto de cumplimiento debe involucrar a EMGESA en cuanto a la operación de Alicachín, y se debe contemplar un caudal mínimo del río en condiciones adecuadas.
- CAR: Muña es territorio de la CAR y no se permitirá que en un embalse regulador sea utilizado para tratamiento mientras causa un efecto ambiental nocivo.
- CAR: La cuenca alta está diagnosticada y se conocen los requerimientos para mejorar la CALIDAD DEL AGUA.
- Existe la necesidad de racionalizar los recursos de agua (alimentar el Distrito de Riego La Ramada con efluente de la PTAR Salitre) y la posible utilización de humedales para refinar el tratamiento.
- Se requiere cultura ciudadana en el manejo de los residuos.
- Se está de acuerdo en que se requiere trasladar beneficios y no trasladar la contaminación.
- La CAR: expresa que es claro que canoas es la solución si se cumple de una forma eficiente: (a) Tiempo de entrada en operación. (b) La calidad de efluente la cual no debe ser sólo para uso agropecuario sino para potabilizar (Municipio de Agua de Dios).
- Puede La Regadera regular los caudales del río Bogotá.
- La CAR: dice que no tiene objeción en el esquema de saneamiento propuesto por el distrito. Finalmente se acuerda que es una decisión del distrito.
- El modelo de la calidad es adecuado y aprobado como herramienta para la toma de decisiones en la planta ambiental de saneamiento.

- El río se debe sectorizar en armonía con el D. 1594/84 (CAR y el DAMA). Actualmente la CAR está haciendo un documento para el Ordenamiento y manejo de la cuenca.
- Las entidades ambientales deben hacer acuerdos y deberán estar armonizadas las metas de vertimiento y calidad de la fuente receptora.
- Se requiere legislación sobre jabones, detergentes y productos agroindustriales biodegradables.
- Para efectos de planificar la obtención de las metas y estándares de calidad y cantidad el agua en el río, el Comité Hidrológico servirá de apoyo a la CAR y al DAMA para mantener, implementar, actualizar, ajustar y operar en modelo de calidad del río. Amarrado a la operación del modelo de balance hídrico y econometría de la CAR. Dejando claro que la función de planificación es competencia de las entidades ambientales. Formarán parte de dicho comité: La CAR, el DAMA, la EAAB, EEB, EMGESA y los demás que los mismos miembros del comité estimen conveniente.
- Controlar la franja aledaña a la ronda del río para controlar contaminación difusa. Seguimiento en las rondas por parte de la autoridad ambiental ya está contemplada en el POT.
- Mientras que la CAR y el DAMA definen los usos y estándares de la calidad del agua en el río Bogotá se utilizará el documento del Acueducto (Unión Temporal) una vez sea revisado por la CAR.
- El DC drenará las aguas del Borde Norte hacia el IRB y lo llevará a la planta de tratamiento de aguas residuales del Salitre.
- Regulación del caudal del río: La óptima utilización del recursos hídrico del río requiere de la variable de calidad del agua como elemento adicional a los actualmente considerados para la operación de los embalses.

- En épocas críticas de verano las concentraciones se incrementan, disminuyendo los usos del recurso hídrico.
- Se recomienda que en época de caudal crítico de verano se pueda acudir como medida complementaria, al uso del agua embalsada de acuerdo con el modelo de la calidad del agua.
- Se está estudiando la posibilidad de un caudal ecológico en el Orinoco, cuenca hidrográfica donde originalmente drena Chingaza y de donde es trasvasada en la cuenca del río Bogotá.
- Es conveniente el uso de los excedentes de las aguas embalsadas, como medida complementaria para mejorar la calidad del agua en la época crítica de verano, que coincide con la época húmeda de la cuenca del río Guatiquía. Para adoptar esta medida complementaria, es competencia de la autoridad ambiental pertinente la adopción de esa medida teniendo en cuenta la ubicación geográfica del embalse en la cuenca de la Orinoquía.
- Capacidad de diseño de la Ramada  $5.6 \text{ m}^3/\text{s}$   $1.8 \text{ m}^3/\text{s}$  es la máxima capacidad en invierno y con bombeo del Tabaco en verano.
- Usos del agua en la Ramada: riego de hortalizas, flores, papa = Agricultura tipo I. Actividades pastoriles. Ganadería lechera. Productos de exportación (no se especificó que tipo de productos). Agricultura = 14%. En ganadería y abrevaderos = 86%. Pacto de riego en la Ramada es de 0.21l/ha.s.
- La operación de la Ramada puede ser modificada utilizando la Estación Elevadora de la Jiménez antigua bocatoma del distrito de Riego.
- Objetivo del proyecto Ciudad – Región: Desanimar el proceso de construcción / industrialización. No se percibe esta misma visión en los municipios aledaños a Bogotá. El pacto de Cundinamarca

deberá fijar indicadores, parámetro y normas técnicas por medio de un estudio para el que la CAR debe llamar a concurso.

- Por otra parte se hace necesario estructurar una concesión tendiente a complementar los estudios, obtener licenciamiento, cierre financiero, realizar diseño, construcción, operación y mantenimiento de la PTAR Canoas.
- En lo referente del Distrito de Riego de la Ramada, el cual entraría a operar en el año 2009, la PTAR Salitre operaría con capacidad plena con un tratamiento primario químicamente asistido - TPQA, y se quiere aprovechar el agua tratada para el Distrito de riego, se tendría que cumplir los estándares de calidad de acuerdo al uso.
- Frente al tema de la descarga de después de PTAR Canoas, se manifestó que con el programa integral de descontaminación, el cual contempla entre otros:

-Descontaminación en la fuente.

-Programa de producción más limpia en las industrias.

-Implementación y ejecución de los planes maestros de alcantarillado de los municipios.

-Optimización de las PTARS de la CAR y construcción de otras PTAR.

-Construcción de interceptores Engativá - Cortijo, Fucha - Tunjuelo, estación elevadora Canoas, interceptor Canoas-Alicachín y la PTAR Canoas, permitirán mejorar gradualmente las condiciones ambientales y sanitarias del Río (sic) Bogotá, por otra parte el Ministerio de Ambiente,

Vivienda y Desarrollo Territorial, fijaría los requerimientos como el concerniente dicha descarga.

- Se solicitó a la CAR y a la gobernación de Cundinamarca, formular por escrito las inquietudes que aún se tuvieran frente a la propuesta técnica del Distrito Capital, para que se presentaran a la Empresa de Acueducto y Alcantarillado y a la señora Magistrada.
- Se realizó la presentación del proyecto pacto de EEE y EMGESA, por parte de EMGESA, en el que destacan entre otros:

-Dique impermeable que permitirá sectorizar el embalse en diversas zonas y dirigir el flujo de aguas para aumentar su tiempo de permanencia en él.

-Laguna anaerobia zona 1 en la cual se reducirá la carga orgánica ( en un 40% con un periodo de residencia de 1,5 días).

- Laguna aerobia o zona 2 dentro del mismo dique impermeable y separada de la zona 1 por una barrera flotante, que contaría con aireación forzada en la cual el agua permanecería 6 horas, al cabo de las cuales se habría reducido la DBO en un 10% adicional al valor de entrada del embalse.

- Zona de control de Buchón: En el cuerpo principal se conformarán 3 zonas separadas con barreras flotantes que tendrán distintas densidades de buchón, en la zona 3 se realizará cosecha de buchón y servirá como área piloto para determinar la forma mas eficiente de manejo. Así mismo, en esta zona continuará reduciéndose la DBO y la calidad del agua seguirá su proceso de mejora.

-Cuerpo principal o zona 4: Estaría separado de la zona 3 por una barrera flotante para evitar el paso del buchón, en ella el agua permanecería 13,5 días y se lograría una mejora de la calidad del agua.

-Zona de aislamiento y protección del Municipio o zona 5. Se conformará una zona libre de buchón en el sector del embalse más cercano al casco urbano (zona 5), para mitigar las condiciones de anidación de zancudos. Se instalará un sistema de aireación forzada mediante tubería perforada y compresores que operen en forma continua, para reducir malos olores y controlar zancudos.

-Se presentó una muestra de las lámparas para el control de los mosquitos.

- Se aclararon algunas inquietudes de la Gobernación de Cundinamarca y de la CAR frente a la Propuesta de EEE-EMGESA.

6.8.7. Como puede verse, en la mencionada mesa de solución integral se puso como cuestión fundamental que el Plan Regional se encuentra enmarcado dentro de una definición de los usos y estándares de calidad del agua del Río Bogotá en toda su cuenca, definidos a partir del desarrollo de la región, sus necesidades y su disponibilidad de recursos, preservando como criterio básico que la remoción per se de carga contaminante no puede ser el objetivo a seguir, sino la obtención del nivel de calidad acordado al mínimo costo posible.

6.8.8. Otro criterio fundamental que hace parte de los principios básicos sobre los que se enmarca el Plan Regional, es que el impacto de la contaminación de las descargas del Río Bogotá sobre la cuenca baja debe ser tan moderado que no influya significativamente en la calidad de sus aguas.

6.8.9. De esa manera, la Sala debe partir de un principio, tal y cual así quedó definido con las partes del proceso, que la meta para la protección de los derechos colectivos invocados como vulnerados, únicamente puede alcanzarse si se logra UN MODELO DE PLANIFICACIÓN para la descontaminación del RÍO BOGOTÁ y de sus afluentes, lo cual sólo puede ser posible a partir del esfuerzo conjunto en el diseño y ejecución de las acciones y obras que todas las entidades territoriales situadas en sus cuencas estén comprometidas y convencidas de que deben realizar, de una manera coordinada y permanente, involucrando a la población en los procesos de producción más limpia y con la gestión de cada uno de los alcaldes ante las instancias gubernamentales para que participen en la gestión que desde sus Planes de Ordenamiento Territorial se han propuesto, mediante la inscripción de sus proyectos en, primera instancia en el Departamento de Cundinamarca y en segunda, ante los Ministerios del Ramo, como ante la CAR CUNDINAMARCA en lo que a estos les compete según las previsiones de la ley.

6.8.10. El desarrollo de la REGIÓN BOGOTÁ-CUNDINAMARCA debe tener primordialmente presente el saneamiento básico, con lo cual se brindan los estándares de calidad del servicio necesarios para garantizar la calidad de vida en la región, reconociendo la importancia de las inversiones ya realizadas en la cuenca alta, media y baja del río Bogotá entre las cuales se encuentran las obras realizadas por la EEB y por EMGESA en el EMBALSE DEL MUÑA como en el MUNICIPIO DE SIBATÉ, región esta última que está sufriendo los rigores de la contaminación del río y de sus afluentes, sin que hasta la presente le

hayan salido verdaderos dolientes en las cuencas anteriores a donde se traslada el impacto ambiental negativo.

**6.8.11. Agravación del Daño Ecológico por la Dilación en el Tiempo del Proceso Iniciado por el Señor Gustavo Moya Ángel.** Merece que la Sala no pase por alto el hecho de que las autoridades del municipio como sus pobladores no hubiesen estado atentos al desarrollo de este proceso desde la época en que el señor GUSTAVO MOYA ÁNGEL instauró la acción, año de 1992, por sobre todo si a la CAR le fue denunciado el pleito por la EEEB, amén de que el MINISTERIO DEL MEDIO AMBIENTE fue vinculado como interviniente, pues sólo cuando el proceso llegó a esta corporación y ante la actividad desplegada por la Magistrada Sustanciadora se le ha buscado la solución integral al problema ambiental, como quiera que la planta de tratamiento que se ha pretendido construir antes de embalsar las aguas, bien se hubiera podido realizar mediante la pignoración a largo plazo de los recursos que por transferencias a los municipios de la cuenca y de la zona del embalse, como a la CAR ha venido realizando la empresa generadora de energía eléctrica, por medio de la constitución de un FONDO CUENTA, más sin embargo no se sabe en qué se han invertido y si lo han sido no se alcanzado el objetivo propuesto por la falta de gestión de unas acciones conjuntas de todos los involucrados en el tema; mereciendo una investigación al respecto por parte de la Contraloría General de la Nación, aun cuando la acción fiscal se encuentre prescrita para algunas vigencias presupuestales, pero sí con el objetivo de establecer la falta de diligencia de unos y otros pretendiendo evadir su responsabilidad por el lado más fácil, esto es exigiendo su construcción por la misma empresa que les proporciona recursos para el mantenimiento de la fuente hídrica y la cual tributa por la realización del hecho generador más no por que sea ella la que esté ocasionando la contaminación de las aguas que trasvasa.

6.8.12. Continuando con el esquema de descontaminación del RÍO BOGOTÁ, debe resaltarse que requiere del saneamiento integral de la cuenca, para lo cual involucra los siguientes aspectos que han sido puestos de presentes por las partes:

- Modelo de desarrollo futuro del Distrito Capital y la Región
- Modelo de desarrollo futuro del acueducto Regional (*para el caso de los municipios que decidan acogerse*).
- Modelo de plantas de tratamiento de aguas residuales
- Modelo para uso del agua del Río Bogotá en riego
- Manejo ambiental de la cuenca del Río Bogotá

6.8.13. Todo lo cual pone de presente la labor conjunta de las autoridades de la MESA DE PLANIFICACIÓN DE LA CUENCA para definir aspectos tales como la **migración a la ciudad y región**, estructuración de actos legislativos referentes al **reconocimiento y distribución de las rentas** y la divulgación y promoción del modelo de crecimiento desconcentrado para la ciudad-región.

6.8.14. Así las cosas, las órdenes a impartir en esta sentencia para lograr los objetivos trazados, que se contrae a **reducir el impacto ambiental en toda la cuenca del RÍO BOGOTÁ y el de sus afluentes**, sólo se puede alcanzar mediante la puesta en marcha de manera inmediata de las siguientes acciones y obras que se ejecutarán en el tiempo propuesto en los respectivos pactos, como en el que en esta sentencia se determine, a corto, mediano y largo plazo, en el evento en que se advierta la necesidad de desarrollarlos en un término menor al ofrecido.

## 6.9. DE LA APROBACIÓN DE LOS PACTOS DE CUMPLIMIENTO REGISTRADOS POR LOS MUNICIPIOS

6.9.1. Además de los aspectos y órdenes que se mencionan e imparten en el punto 6.10.2 (6.2.10.1. a 6.10.2.5) de esta sentencia, en lo que tiene que ver con los MUNICIPIOS la aprobación de los pactos se sujetará al cumplimiento de las siguientes reglas:

- *Procesos de Producción más Limpia* para lograr la descontaminación en la fuente, adscrita en primer lugar a la CAR como suprema autoridad cuenca en el sector municipal y en el rural del Distrito Capital y al DAMA en el sector urbano de éste, en segundo lugar y de acuerdo con las atribuciones especiales previstas en el artículo 65 de la Ley 99 de 1993, a cargo de los alcaldes municipales como locales del Distrito Capital, a quienes como primera autoridad de policía en el área de su municipio o de su localidad, les corresponderá cooperar con la autoridad ambiental para lograr tales metas, unos y otros bajo la coordinación de las autoridades ambientales, las que previamente en mesas de trabajo deberán enfilar dicha actividad hacia los vertimientos industriales (en especial los de la industria casera), agrícolas y pecuarios y demás, e implementar y realizar coordinadamente con las Juntas de Acción Comunal y con las escuelas y colegios la gestión de talleres con aquél sector de la producción como con los pobladores por los vertimientos residuales domésticos para evitar que al alcantarillado se arrojen carbohidratos y grasas que son nocivos para las fuentes de aguas en cuanto pueden llevar al consumo del oxígeno natural y al desarrollo de condiciones sépticas, como también para incentivar el uso de detergentes biodegradables y reducir en el área de su localidad el uso exagerado de tales jabones que al contener altos niveles de fósforo producen la eutrofización del cuerpo receptor, como ampliamente quedó analizado

en el aparte pertinente de este fallo al referirse sobre el estado del río y el uso de las aguas, entre tanto el gobierno nacional reglamenta lo pertinente. No deberán perder de vista dichas autoridades la importancia en el control de los nutrientes y plaguicidas en la agricultura.

En cumplimiento de esta orden, igualmente deberán gestionar y promover con la coordinación y dirección de la Secretaría de Educación y de Salud para llevar a cabo dentro del PRAE de cada una de las escuelas y colegios de los municipios la educación ambiental y por conducto de sus puestos de salud u hospitales los talleres de producción más limpia.

- *Ejecución de los Planes Maestros de Alcantarillado* para que todas las aguas residuales de cada municipio lleguen a las respectivas Plantas de Tratamiento deberán terminar tales obras en el tiempo señalado dentro de sus respectivos Pactos de Cumplimiento, en todo caso para el año 2009, sus vertimientos deberán ir directamente a las PTAR y no a las fuentes de agua natural.
- *Construcción de las Plantas de Tratamiento.* Los municipios que no realizaron gestiones ante la CAR para la ejecución de tales obras, entidad que ya no tiene a su cargo el realizarlas según lo prescrito en la Ley 99 de 1993, tendrán a su cargo el construir las que falten para cubrir todo el caudal de sus vertimientos residuales y con cargo a la sobretasa del predial que la CAR debe transferirle en un 50%, lo cual deberán acordar con esta entidad en orden a priorizar sus obras de saneamiento ambiental, como también con el producto de los recursos por Regalías y Ley 715 de 2001, en fin de aquellos de que dispongan para tales fines. Por su parte, la CAR en cumplimiento de lo aprobado

por las partes en la audiencia en que fue discutido su pacto de cumplimiento, deberá poner las PTAR que tiene instaladas en los municipios a operar en óptimas condiciones y entregarlas en el término máximo de tres (3) años y pagar la deuda que contrajo de las que ya existen.

- *Operación de las Plantas de Tratamiento a partir de la fecha en que la CAR les haga entrega de las ya instaladas por su cuenta.* Realizada la entrega de las PTAR por la CAR, los municipios con cargo a la tasa retributiva que hace parte del cargo por unidad de consumo, consagrado en el artículo 90 de en la Ley 142 de 1994 y en los artículos 4º y 37 de la Resolución CRA 287 de 2004 aplicable a todas las personas prestadoras de los servicios de acueducto y alcantarillado, salvo las excepciones contenidas en la ley, según la previsión del artículo 1º de la precitada resolución, deberán disponer de los recursos para su operación y mantenimiento. Desde ese momento, el municipio será el responsable de la contaminación de los recursos hídricos que sean utilizados para descargar directamente sus vertimientos residuales.
- Cumplimiento de las sentencia dictadas por este tribunal sobre la *optimización de los mataderos y plantas de faenado* en el término que en ellas se dispuso, como también las de aquellos municipios que no han sido objeto de la interposición de Acciones Populares sobre la materia y que estén contaminando las aguas con los residuos ruminales.
- Gestión ante la CAR y el MAVDT para que *cese la contaminación por escorrentía* de las laderas y cerros de las exploraciones y explotaciones mineras. Esta conducta dará lugar a la compulsa de las piezas procesales pertinentes para que se abran los respectivos

procesos penales por incursión en los hechos ilícitos previstos en los artículos 332 y 333 del Código Penal.

- Exigencia como primera autoridad de policía a quienes se encuentren explotando sus recursos naturales renovables y no renovables para que procedan a la *reforestación de los cerros que rodean a sus municipios, de los nacimientos y de las cuencas de los ríos y quebrada afluentes del RÍO BOGOTÁ* y de éste, cuando a consecuencia de sus procesos productivos hayan ocasionado dicho impacto ambiental. Deberán proceder los señores alcaldes a formular ante la CAR y ante el MAVDT los respectivos procesos sancionatorios y éstas deberán en forma inmediata adelantar el trámite sin demoras tendientes a que se cumpla esta orden por los particulares o entidades responsables del daño ambiental. Término máximo para mostrar los resultados de este proceso de control seis meses contados a partir de la notificación de esta sentencia, teniendo en cuenta el requerimiento continuo que la Magistrada Sustanciadora ha venido realizando a las autoridades ambientales para exigir de los particulares y demás personas jurídicas que se encuentren adelantando dichas actividades sobre el cumplimiento de las obligaciones de los estudios de impacto ambiental o de los planes de manejo cuando se les concedió las licencias, permisos o títulos mineros y, el cierre a las que no hayan sido objeto de los mismos.

6.9.2. El incumplimiento de esta orden por unas y otras autoridades dará lugar no solo a la apertura del trámite incidental por desacato, sino a la compulsa de las piezas procesales pertinentes ante la PROCURADURÍA GENERAL DE LA NACIÓN y ante la FISCALÍA GENERAL DE LA NACIÓN para efectos de las sanciones disciplinarias a imponer y para que se determine su responsabilidad penal como copartícipes en la comisión de los tipos penales descritos en los artículos 331, 332, 333 del

Código Penal, por continuar contribuyendo con su actuar omisivo a la realización de la conducta punible (inc. 2º, art. 30 C.P.).

6.9.3. Los municipios como el Distrito Capital, deberán tener en cuenta que la inversión de sus recursos en reforestación sólo corre a su cargo en defecto del cumplimiento de tal obligación por los particulares, a quienes, previamente deberán adelantarse los procesos administrativos correspondientes en orden a que sean ellos quienes den cumplimiento a lo dispuesto en los artículos 57 y 60 de la Ley 99 de 1993.

6.9.4. Aquí cabe resaltar que las zonas de ronda de los ríos y quebradas son zonas de propiedad de la Nación por lo que no cabe ninguna indemnización para quienes en forma ilegal las hubieren invadido y, en caso de que las autoridades municipales como distritales (Planeación Distrital o la Curaduría Urbana) hubiesen otorgado las respectivas licencias de urbanización y de construcción, deberán proceder a repetir contra los urbanizadores por las sumas que por la recuperación de tales predios tengan que cubrir a los particulares que de buena fe las hayan adquirido. Para determinar ese postulado constitucional que se presume con que los particulares actúan frente a las autoridades, éstas, previamente deberán tener en cuenta cuál es el grado de responsabilidad de la Administración Pública en la realización de las actividades de urbanización y construcción que dieron lugar a que los particulares de buena fe hubiesen adquirido sus inmuebles, en todo caso, tal postulado en ningún evento puede serle extensivo a los urbanizadores y constructores no obstante la obtención de los permisos y licencias.

6.9.5. Por su parte, en los eventos en que el MAVDT y la CAR por su actuar omisivos hayan sido permisivos en el control de las licencias, permisos, autorizaciones y concesiones, deberán actuar de acuerdo con lo aquí dispuesto, esto es no podrán invertir sus recursos en reforestación que corresponde a quienes han explotado los recursos naturales.

**6.9.6. Con el cumplimiento de las anteriores órdenes la Sala imparte su aprobación a los pactos presentados por todos los municipios de la CUENCA ALTA y de la CUENCA MEDIA.**

6.9.7. Sin embargo, en cuanto al MUNICIPIO DE VILLAPINZÓN se dispone, además de lo propuesto, la obligación de construir la Planta de Tratamiento de Aguas Residuales en un término máximo de tres años, atendiendo a que la CAR de acuerdo con lo pactado realizará las mejoras a las PTAR que tiene operando en los demás municipios. Igualmente, el alcalde del municipio deberá gestionar y coordinar con el DEPARTAMENTO DE CUNDINAMARCA y con el MAVDT, la celebración de un Convenio Interadministrativo de cofinanciación para la adquisición de viviendas de interés social para los pobladores de la zona de ronda del río Bogotá que demuestren que se tratan de personas con necesidades básicas insatisfechas y sin recursos para reubicarse en otro lugar (determinada en el POT municipal y de acuerdo a la franja dispuesta en la ley) donde funcionan las curtiembres.

6.9.7.1. En cuanto a los que no se hallen en tales condiciones y de quienes se determine que están en capacidad económica para adquirir en forma inmediata su propia vivienda, deberán salir de la zona de ronda en el término que determine la CAR.

6.9.7.2. De los primeros, la CAR deberá tener en cuenta que al igual que los que están metros más arriba de la zona de ronda, unos y otros se encuentran contaminando el RÍO BOGOTA mediante el vertimiento directo de los residuos sólidos (caracterizados por alto contenido de DBO%, DQO y SST) de su proceso productivo, agravado por el uso de los metales (cromo, cloruro de sodio, cal sulfuro de sodio) y por las pequeñas cantidades de barnices y disolventes que en menor cantidad utilizan en los acabados finales como colorantes, todos los cuales impactan negativamente la

fuentes hídricas de la que utilizan un gran volumen de agua, como también por filtración afectan los suelos y las aguas subterráneas.

6.9.7.3. Por todo ello, lo prioritario en este momento es la inversión por la CAR en los programas que incentiven los procesos de producción más limpia de unos y otros y de ser necesario, ser el ente articulador para gestionar un convenio entre el municipio (quien dentro de su propuesta de pacto señala el proceso de curtiembre como una de sus metas ambientales, como quedó consignado en el aparte correspondiente) y el departamento la construcción de la planta de tratamiento de cromo y demás metales que pueden ser reutilizados en el proceso de producción, logrando el aporte de tales entes como la inversión por los curtidores cooperados mediante la financiación de los costos de todas las obras que demande la producción más limpia de las curtiembres, con el fin de se haga realidad la implementación de acciones de PML por la autoridad ambiental encargada de jalonar dicho objetivo, respetando y promoviendo las empresas familiares para hacer más competitivo el sector curtidor no solo a nivel mundial sino nacional, como ha sido el objetivo que se trazó en las mesas de trabajo de todos los involucrados en el tema, presididas y auspiciadas por la Magistrada Sustanciadora, en orden al respeto del derecho al trabajo de las clases menos favorecidas, a las que no obstante haber causado un grave daño al medio ambiente, por las necesidades básicas insatisfechas a que los ha llevado un Estado negligente que en forma permisiva dio lugar a dichos asentamientos humanos (*tras los que existe un sector fuerte de la producción de los Municipios de Villapinzón, Chocontá y el D.C. se ha prevalido para acumular su riqueza*), de lo que no se puede decir si unos u otros tienen un mayor grado de culpa y de responsabilidad cuando son las propias autoridades que no ponen remedio a esa invasión y degradación de los recursos naturales.

6.9.7.4. Con el mismo criterio y bajo las órdenes acabadas de impartir los curtidores de Chocontá deberán acoger las políticas de la PML con

las directrices y órdenes de la CAR so pena del cierre definitivo de las empresas a quienes desacaten este fallo. Para tales efectos el alcalde municipal deberá proceder en el sentido dispuesto para el Municipio de Villapinzón, bajo las instancias de la CAR y del DEPARTAMENTO DE CUNDINAMARCA como así se impartieron las observaciones y órdenes para éste.

#### 6.10. APROBACIÓN DEL PACTO DE CUMPLIMIENTO REGISTRADO POR EL DISTRITO CAPITAL-DAMA Y POR LA EAAB.

Ahora bien, en cuanto a la aprobación del pacto de cumplimiento del DISTRITO CAPITAL, que se encuentra ubicado dentro de la CUENCA MEDIA la Sala estima pertinente hacer las siguientes observaciones y modificaciones a sus propuestas:

6.10.1. Se comenzará por acoger lo propuesto por el D.C. y la EAAB, en cuanto a que para la CUENCA MEDIA, cualquier sistema de tratamiento alternativo a implementar debe tener en cuenta la existencia de la planta de tratamiento de aguas residuales de El Salitre. Se incluyen las obras de ampliación de la planta, con el objeto de tratar todo el caudal de aguas residuales que produce esta subcuenca.

6.10.1.1. A ese respecto, la necesidad de la AMPLIACIÓN DE LA PLANTA EL SALITRE se encuentra suficientemente probada en el proceso en cuanto su capacidad se encuentra subdimensionada pues sólo alcanza a tratar 4 metros cúbicos por segundo, en tanto el caudal que ingresa por el RÍO JUAN AMARILLO o SALITRE, imponen dimensionarla para tratar por encima de los 8 metros cúbicos por segundo. En ese sentido, todos los técnicos de las autoridades ambientales como del departamento y del distrito capital, incluidos los de la CAR y del MAVDT son sabedores de la insuficiencia de la planta para

tratar el caudal residual que hoy ingresa por la CUENCA MEDIA a la altura del RÍO JUAN AMARILLO, agua que al ser tratada, y en las condiciones de uso que para el efecto establezca la CAR quien es la autoridad ambiental que bajo su jurisdicción tiene el DISTRITO DE RIEGO LA RAMADA (como se acordó en la Mesa de Solución Integral del RB), puede y debe llevarse en un caudal del orden de los 2 o 3 metros cúbicos por segundo con el fin de proteger las aguas subterráneas que en dicho distrito están siendo objeto de un uso indiscriminado por parte de los productores de dicho sector, lo cual es causa del grave desnivel de los suelos, fuera de que la contaminación del río, como se anota en esta sentencia, afecta las aguas del subsuelo, no siendo por tanto las mismas, garantía para el riego de las hortalizas y legumbres y demás alimentos que desde allí se producen, que por lo demás en un período muy corto comenzarán a desaparecer si no se protege el RB de la contaminación.

6.10.1.2. Por ello y habida cuenta que la ampliación de la PTAR SALITRE constituye un costo de inversión, la Sala estima que la orden a cumplir por parte de la CAR será la continuación en el cumplimiento de hacer las correspondientes transferencias dispuestas en el parágrafo 2º del artículo 44 de la Ley 99 de 1993, que le ordena de manera imperativa que el 50% del producto del recaudo del porcentaje o del impuesto predial del Distrito Capital debe ser destinado a la gestión ambiental **dentro del perímetro urbano de donde se recauda**, cumplimiento de dicha obligación que no sólo tiene su apoyo jurídico en la ley, sino en el Decreto 1339 de 27 de junio de 1994, por el cual se reglamenta el porcentaje del impuesto predial a favor de las Corporaciones Autónomas Regionales, en desarrollo de lo previsto en el artículo 44 de la Ley 99 de 1993, el cual en su artículo 9º establece “ ... *Cuando se trate de ciudades con más de 1000.000 de habitantes de acuerdo con los datos del último registro en el DANE, el cincuenta por ciento (50%) del producto correspondiente al porcentaje del impuesto predial a que se refiere el presente decreto, será destinado a exclusivamente a gastos de inversión ambiental para tales ciudades de acuerdo con*

*sus planes ambientales.*” Y si para este caso, en el Plan de Gestión Ambiental 2001-2009 del Distrito Capital, dentro del programa “*Manejo del Ciclo del Agua*”, subprograma “*Optimización del Ciclo del Agua*”, contempla como proyecto prioritario el diseño y construcción del sistema de tratamiento de aguas residuales; es a este al que la CAR debe destinar esos recursos y no a otros, fuera de que ésta no puede desconocer el convenio que para tales efectos suscribieron el alcalde de la capital y el director de la CAR en el año 2003, que como contrato interadministrativo válidamente celebrado es ley para las partes, máxime aún que tal transferencia fue objeto de una de sus propuestas, **la cual obedece a la constatación de la prioridad de la descontaminación del RB por encima de los demás proyectos ambientales que tenga la CAR en el territorio de su jurisdicción dentro del Distrito Capital**, de éstos, debe repetirse, son los particulares con sus propios recursos quienes deben devolver al medio ambiente los bienes tangibles e intangibles de los que ilícitamente dispusieron y apropiaron, cohonestados por una FALTA DEL PODER DE ESTADO por la ineficiencia de sus funcionarios en el cumplimiento de sus tareas ambientales como órganos controladores y propulsores de las licencias, permisos, autorizaciones y concesiones ambientales.

6.10.1.3. Con relación al Convenio 250 de 1997 (fl. 94, c.1.3. anexo), cuya copia obra en el expediente, debe anotarse que si bien los recursos de la sobretasa del predial debía transferirlos la CAR directamente al Fondo Cuenta que se organizó para los efectos de la descontaminación del RÍO BOGOTÁ, los cuales estuvieron destinados al cumplimiento del contrato 015 de 1994, no es menos cierto que la terminación unilateral de este contrato por parte del Distrito Capital, per se no liberaba a la CAR, como ella lo pregon, de continuar cumplimiento con esa obligación de transferencia, pues atendiendo a las normas de interpretación armónica

de los contratos previstas en el artículo 1622 del Código Civil<sup>40</sup>, de su contexto brota que siendo la causa inmediata de tal convenio la PROMOCIÓN INTEGRAL DE LA DESCONTAMINACIÓN DEL RÍO POR PARTE DE LA CAR en relación no solo con los vertimientos del Distrito Capital sino de toda la cuenca (CLÁUSULA 9), no se ve como la terminación del contrato por causas justificadas en razón a la insuficiente capacidad de la planta para tratar los vertimientos de la Cuenca Media, constituya un obstáculo para la autoridad ambiental, si como se indica el propósito que la asistió para celebrarlo fue que los recursos destinados por ley para transferir al Distrito es la descontaminación del RÍO BOGOTÁ, cambiando de rumbo dicho objetivo pretendiendo hoy su inversión en otras obras diferentes al propósito que inicialmente emprendió y que en todo caso continúa siendo el prioritario. Pareciera ser que si el contrato no se hubiera terminado no obstante el detrimento patrimonial que se vislumbra por la razón acabada de anotar (la no descontaminación del total del caudal de la fuente hídrica), la CAR hubiera continuado transfiriendo los recursos con cargo al contrato 015. La Sala resalta que si lo importante es la descontaminación del río no importa quien sea la autoridad o persona natural o jurídica que asuma la obligación de tratar el efluente, lo importante es el resultado y como éste no se había logrado, valga insistir, no se podía continuar con un contrato que a la postre resultaba inconveniente para los intereses generales.

6.10.1.4. De otra parte, no pueden olvidarse las reglas de la representación de las personas jurídicas, por lo cual los actos válidamente celebrados por los anteriores representantes –para el caso el anterior director de la CAR, los alcaldes municipales y los Ministros del Ramo que en su oportunidad suscribieron los contratos para efectos del cumplimiento de las Propuestas de Pacto, algunos de los cuales se encuentran en ejecución-, obligan a los nuevos, pues en tal caso la capacidad jurídica está en quienes en su momento ostentaban

---

<sup>40</sup> “las cláusulas de un contrato se interpretarán unas a otras, dándoseles a cada una el sentido que mejor convenga al contrato en su totalidad”.

esa calidad y no en los que posteriormente lleguen a representar a un organismo como si tales contratos o negocios jurídicos pudieran ser desconocidos, desquiciando la seguridad jurídica en cuanto pasan a ser normas de obligatorio cumplimiento para las partes del mismo, cuando no han sido anulados por la justicia ordinaria, máxime, como lo señala el Consejo de Estado en sentencia de la cual se transcriben unos apartes, en un problema de la envergadura como lo es el del RÍO BOGOTÁ en el que aprobada la solución técnica y establecida por motu propio de las partes en sus diferentes propuestas e Pacto de Cumplimiento, o por decisión del tribunal, se establecen cuáles son las obligaciones que a cada uno le compete realizar para lograr la salvaguarda a los derechos colectivos.

6.10.1.5. Por todo ello, permitir que una sola de las partes so pretexto de anunciarse como la autoridad ambiental para sustraerse a lo convenido, propicie el desorden y el desconocimiento de las reglas consignadas en la Ley 472 de 1998 (que podría avisorar una conducta de deslealtad procesal y de irrespeto de un trabajo judicial para solucionar el conflicto, el cual ya no está en manos de la autoridad ambiental), desconociendo que la solución integral para la descontaminación del río requiere de esos aportes como así lo aprobaron todas las partes, al no advertir la Magistrado Sustanciadora vicios de ilegalidad en ninguna de las propuestas al momento en que fueron discutidas, sin que la aprobación que por la vía de esta sentencia se imparta, pueda constituirse en una oportunidad más para que las partes se sustraigan a los compromisos que fueron objeto de sus pactos, por cuanto la discusión de los mismos en este caso, precisamente se hizo en consideración a dejar en firme las obras a realizar en el futuro, quedando a la Sala de Decisión pendiente el examen de legalidad, respecto del cual no encuentra que las propuestas de pacto presentadas por todas las partes adolezcan de vicios de ilegalidad como para llegar a desaprobarnos.

6.10.1.6. De otra parte, no sobra recordar que es el Distrito Capital quien con el pago de sus tributos subvenciona la mayor parte de los gastos de la Nación, merece no sólo un mayor aporte de la Nación, sino de los de todos los entes públicos y privados para la solución de la descontaminación del RÍO BOGOTÁ, por lo que no sólo deben respetársele las rentas de destinación específica de las que la Constitución y la Ley lo provee, distrito capital que siendo la puerta de Colombia ante el mundo entero, no puede mostrar su entorno, principalmente sus recursos hídricos como una “**cloaca**”, **como indignamente es el ropaje que al RÍO BOGOTÁ le han dado los Ministerios y demás entidades territoriales** que intervienen en esta acción, **parodiando la expresión de alguno de los actores populares**, afirmación que de los apartes de sus escritos ha sido objeto de resalte en esta providencia, para mostrar también que siendo concientes de ese grave estado de degradación, aun siguen siendo reticentes a aportar sus esfuerzos no sólo en acciones sino con el aporte de los recursos económicos de sus presupuestos, específicamente destinados por la ley para el saneamiento del ambiente y de los recursos hídricos, como que aquellas sin estos resultan insuficientes para los objetivos trazados, cuando este tribunal no obstante la congestión que existe causada por el desorden y la indolencia de la Administración Pública, propicia un trabajo concertado para evitar el postrero fallecimiento de la fuente de la Sabana más visible a los ojos de los extranjeros que día a día llegan a ella, propiciando en todos los que han intervenido en el proceso para que ingresen en las prácticas que propugnan por la descontaminación en la fuente, o continúen con ellas, las cuales son más eficaces que unas cuantas plantas de tratamiento, que por subdimensionamiento pasarían a ser obsoletas en unos pocos años, si todos los que contaminan no adecuan sus comportamientos al PML.

6.10.1.7. En los anteriores términos, la transferencia de los recursos del 50% del predial de Bogotá, debe hacerla la CAR sin que constituya un

impedimento jurídico el cierre financiero del contrato 015 (desembolsos mensuales de los que se advierte la incursión en una eventual responsabilidad fiscal por quienes no obstante el caudal tratado de 4 m<sup>3</sup>/s, con su actuar omisivo cohonestaron la celebración y continuidad del contrato contradiciendo los estudios de la EPAM que recomendaron el tratamiento de un caudal cercano a los 7 m<sup>3</sup>/s, como se reseñará más adelante) como quiera que existiendo el CONVENIO CAR-DISTRITO 2003 a que se acaba de hacer alusión, el CONVENIO 250 que en su momento celebró para dar cumplimiento a dicho contrato, sólo requiere de los ajustes en lo atinente a la ampliación de la planta. **A ese respecto, cabe anotar que por encima de la ley y la protección de los derechos colectivos amparados por la Constitución Nacional, no pueden estar los impedimentos que la CAR propone para abstenerse de cumplir sus mandatos, que al no ser dirimentes, sólo constituyen el fundamento del control de cumplimiento de las obligaciones en que se soporta el gasto.** De otra parte, cabe resaltar que aun cuando se dio la terminación unilateral del contrato 015 de 1994, la PTAR tiene que seguir operando por que lo contrario constituiría un detrimento patrimonial de un bien que fue construido en beneficio del interés general y que requiere su ampliación.

6.10.2. La Sala igualmente tiene en cuenta que el proyecto presentado por el Distrito Capital y la EAAB, después de la ampliación de la PTAR SALITRE continúa con la construcción de los interceptores, el primero de ellos será el Engativá-Cortijo, que permitirá el control de vertimientos de aguas residuales en el tramo desde el costado norte del aeropuerto hasta el interceptor Salitre, para finalmente entregar sus aguas a la PTAR El Salitre.

6.10.3. Posteriormente, el interceptor Fucha -Tunjuelo que entregará sus caudales amortiguados a la estación elevadora de Tunjuelo y ambos servirán a las cuencas Fucha y Tunjuelo.

6.10.4. A continuación se requiere el interceptor Tunjuelo-Canoas que se desarrolla más o menos paralelo al Río Bogotá desde la estación elevadora de Tunjuelo hasta entregar a la estación elevadora de Canoas, localizada en el sector del mismo nombre en el Municipio de Soacha, al final de la Sabana de Bogotá. Este interceptor conduce todas las aguas sanitarias de las Cuencas de Fucha, Tintal y Tunjuelo provenientes de la estación elevadora de Tunjuelo y en su trayecto hasta la planta de Canoas drena una serie de interceptores del Municipio de Soacha.

6.10.4.1. Aquí, se advierte que la inconformidad que la CAR muestra sobre la conexión del alcantarillado del DISTRITO CAPITAL con el MUNICIPIO DE SOACHA no tiene razón de ser si se mira que esta localidad en donde se ubica la población más necesitada, Altos de Casucá y Ciudadela Sucre, que vierten sus aguas residuales a los diferentes cuerpos de agua (En la visita a dicho municipio, la Magistrada Sustanciadora, como los funcionarios de la CAR se percataron de ese hecho en las lagunas Terreros Tibanica, sin que tenga justificación alguna que a la alturas del segundo milenio y de la modernidad en zona urbana las personas caminen sobre sus propias excretas), por lo que siendo una ciudad dormitorio del Distrito Capital merece que éste como el Departamento de Cundinamarca cofinancien sus obras de infraestructura básica, en todo caso, con la plena garantía de que el entubamiento, como se califica, de las aguas residuales del Distrito Capital y del Municipio de Soacha no causen un grave impacto ambiental en la CUENCA BAJA, como será otra de las obligaciones a cargo del DISTRITO CAPITAL Y DE LA EAAB que como orden se profiere como parte del cumplimiento de su pacto y de las demás órdenes que para tal objetivo se impartirán más adelante al aprobar la alternativa seleccionada por esta parte y que fue sometida a la discusión como las demás investigadas en la mesa de trabajo de SOLUCIÓN INTEGRAL DEL RB.

6.10.5. Continuando con el esquema de la alternativa seleccionada, se encuentra que al final del interceptor Tunjuelo-Canoas se construirá la estación elevadora de Canoas y la planta de tratamiento, así como el emisario Canoas-Alicachín que drenará los efluentes hasta el sector de las compuertas de Alicachín.

6.10.5.1. Así las cosas, se observa que el interceptor Tunjuelo-Canoas y la planta de tratamiento en el sector de Canoas-Alicachín complementarán el control de la carga contaminante en la cuenca media antes de que las aguas del río Bogotá sean bombeadas al embalse del Muña para ser utilizadas en la generación eléctrica.

6.10.5.2. Como puede verse, el proyecto plantea la implementación de una planta de tratamiento de aguas residuales adicional a la del Salitre la de CANOAS, para atender las cuencas de Fucha, Tunjuelo, Tintal y Soacha, en lugar de las dos plantas adicionales del esquema original.

6.10.5.3. Se prevé la localización de esta planta en la zona comprendida entre la desembocadura del río Soacha y Alicachín, al final de la Sabana de Bogotá, dentro del perímetro del municipio de Soacha, para lo cual el POT ha considerado un sector con uso especial del suelo destinado para el tratamiento de aguas residuales.

6.10.6. De esa manera, el esquema propuesto de saneamiento del río Bogota – 2003, presentado por EL DISTRITO CAPITAL Y LA EAAB se contrae a la Alternativa 4 que selecciona, la cual consta de los siguientes componentes principales:

- Ampliación de la PTAR Salitre y adecuación a TPQA.
- Construcción del Interceptor Engativá - Cortijo.
- Construcción del Interceptor Fucha - Tunjuelo y de la estación elevadora de Tunjuelo.

- Construcción del Interceptor Tunjuelo - Canoas, la estación elevadora de Canoas y del Interceptor Canoas - Alicachín.
  - Construcción de la PTAR Canoas.
- Intercepción de las aguas residuales que llegan a los canales de aguas lluvias.
- Dragado del RIO BOGOTA y de sus afluentes (entre otros Tunjuelo)

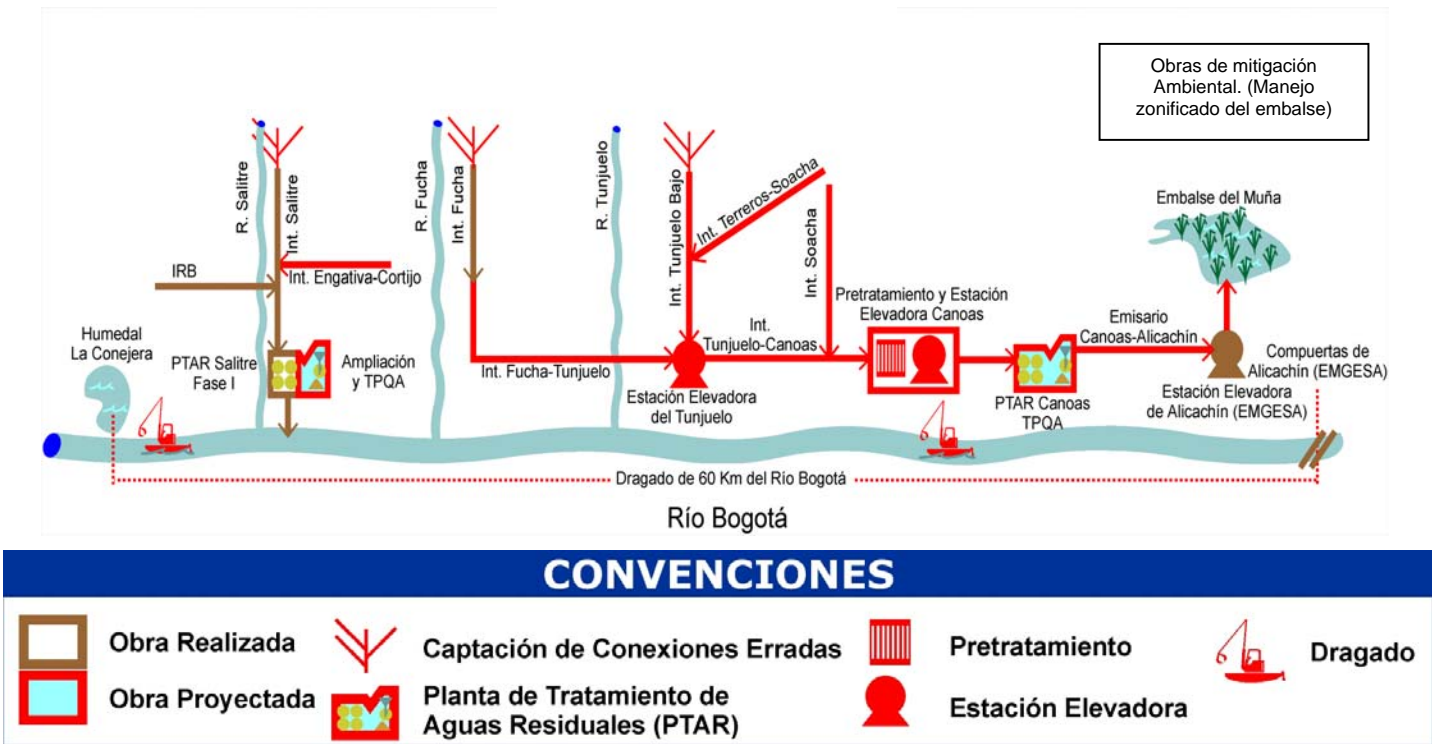

6.10.7. En consecuencia, en consideración a los estudios realizados a los cuales se hace referencia en esta providencia, la mejor alternativa en cuanto a la necesidad de las plantas para tratar las aguas residuales de Bogotá, teniendo en cuenta la relación costo-beneficio es la **Alternativa 4.** que incluye dos plantas de tratamiento una en la desembocadura del Río Salitre y otra en el sitio de Canoas en el Municipio de Soacha, y demás componentes complementarios con tratamiento Primario Químicamente Asistido pero que en todo caso, como se pone de presente en dichos estudios la meta debe llegar al tratamiento terciario en un esquema a largo plazo.

6.10.7.1. Con respecto a la alternativa seleccionada, la Sala debe señalar que no puede perderse de vista que el exigir el tratamiento secundario en la aplicación del modelo de calidad del agua del Río Bogotá, el estudio desarrollado por la Universidad de Los Andes demuestra que llevar el tratamiento al nivel secundario no produce mejoras en la calidad del efluente o del Río Bogotá que permitan un uso diferente al que es posible con tratamiento primario químicamente asistido (TPQA). Luego siendo más costosa la inversión y la operación de los sistemas de tratamiento secundario, no es justificable considerar a mediano plazo esta alternativa, ya que aunque produce una disminución en el pago de las tasas retributivas al obtenerse una menor cantidad de SST y DBO<sub>5</sub> en el efluente, dicho ahorro en costos está lejos de compensar los mayores valores de inversión y de operación del tratamiento secundario, por lo que una vez se cumplan con las obligaciones concernientes a todas las partes de este proceso, en especial, se haga realidad los PML, el Distrito y la EAAB deberán proceder hacia el tratamiento terciario (del que se debe resaltar ni si quiera en Países tan desarrollados se da ese tratamiento, como así ocurre en la ciudad de Londres) en tal sentido. Sobre este tópico merece hacer hincapié que la postura de la CAR no encuentra respaldo, como quiera que el mismo tratamiento que debe dársele sobre la descontaminación del río en la Cuenca Media es igual al que debe seguir dicho órgano en la Cuenca Alta en la que si bien tiene instaladas unas plantas de tratamiento no están actualmente cumpliendo con los mismos cometidos, especialmente por la falta de capacidad de tratamiento del efluente (de una parte porque no están en condiciones óptimas para lograr el nivel de tratamiento que pretende y, de otra por la falta de los alcantarillados que viertan las aguas residuales de los municipios a los alcantarillados), por la inadecuada operación y falta de mantenimiento y, además porque el uso de los efluentes de las plantas también es restringido ya que no tienen una efectividad sobre el parámetro de coliformes, debido a que remueven principalmente carga orgánica y sólidos suspendidos.

6.10.7.2. Continuando con la alternativa 4 seleccionada, merece recabarse nuevamente lo que quedó consignado en el aparte correspondiente sobre los resultados de las diferentes modelaciones de la calidad del agua en la cuenca baja del río mediante la simulación de alternativas de saneamiento en la cuenca media, en las que se incluyen el dragado propuesto por HVM Ingenieros en el año 2000 y la implementación de las obras de mitigación y adecuación del Muña, todo lo cual, al igual que las conclusiones a la que llegó la MESA DE SOLUCIÓN TÉCNICA INTEGRAL DEL RÍO BOGOTÁ dentro de este proceso, muestra que la mejor alternativa es la **5.4** para NKT, OD, SST y DBO, que es la más conveniente en consideración al costo-beneficio para la Cuenca Media y Baja.

6.10.8. Sin embargo, tal y como se indica en los estudios, se insiste, a largo plazo, la ciudad debe prever la necesidad de mejorar paulatinamente los estándares de calidad, para lo cual es conveniente dejar provisiones, especialmente en área disponible, en los sitios donde se van a construir las PTAR para poder llevar a cabo niveles de tratamiento superiores, inclusive terciario.

6.10.9. **Del plazo, del aporte de los recursos para los interceptores Tunjuelo Canoas, Planta Elevadora y Planta de Tratamiento de Canoas, Interceptor Canoas Alicachín.** Ahora bien, en cuanto al plazo para adelantar todas las obras que requiere el saneamiento del RÍO BOGOTÁ, la Sala estima que la mejor alternativa es la alternativa 4 en cuanto se adelanta la ampliación de la planta Salitre para un año, para equiparar en este aspecto las dos alternativas anteriores y el aplazamiento de la planta Canoas en dos años. Se indica que la diferencia más importante de esta alternativa con las dos anteriores es la construcción del interceptor Tunjuelo - Canoas, que adelanta el saneamiento del tramo Tunjuelo -Alicachin al año 2009, conservando el saneamiento del tramo Fucha - Tunjuelo en el año 2008.

6.10.9.1. La principal ventaja de esta alternativa, se anota, es la igualdad de costos, y porque completa el saneamiento de toda la cuenca media del Río Bogotá seis años antes que la Alternativa 3 y nueve años antes que la Alternativa 2.

6.10.9.2. Sin embargo, como quiera que se indica que la desventaja de esta alternativa con respecto a las otras dos, es que la carga contaminante que llega a la cuenca baja del río es mayor durante siete años comparada con la Alternativa 2 y durante tres años comparada con la Alternativa 3, la Sala considera que estas mayores descargas no deben producirse y para evitar un deterioro significativo de la cuenca baja (que es la necesidad prioritaria en este momento y que dio origen a este proceso), se hace imprescindible que desde ya la EAAB comience (como lo recomendó el ingeniero CARLOS ECHEVERRY asesor técnico del Procurador tercero para este proceso y quien como se ha indicado estuvo presente en la Mesa de Solución Técnica Integral del Río Bogotá en representación de ese ente) a estructurar una concesión tendiente a obtener los estudios complementarios, diseño definitivo, cierre financiero, licenciamiento, construcción, operación y mantenimiento de la Planta de Tratamiento de Aguas Residuales de Canoas, para que su construcción se realice teniendo en cuenta el término de la construcción de todos los interceptores, en especial los de TUNJUELO-CANOAS, CANOAS-ALICACHÍN, esto es que para el año 2009 fecha en que se entuba el impacto ambiental de las aguas residuales de la CUENCA ALTA Y LA MEDIA hacia la baja, ya debe estar construida, para lo cual el Presidente de la República a instancias del Alcalde Mayor del Distrito Capital, del Gobernador de Cundinamarca y del Alcalde del Municipio de Sibaté podrá dentro de sus facultades constitucionales acudir hasta el mecanismo de la declaratoria del ESTADO DE EMERGENCIA ECONÓMICA POR PERTURBACIÓN SOCIAL Y ECOLÓGICA DE LA REGIÓN DE LA CUENCA DEL RÍO BOGOTÁ, previsto en el artículo 215 de la Constitución Nacional, con el

objeto que no se dilate la solución integral de la descontaminación del río en el tiempo previsto en esta sentencia y por sobre todo para remediar en forma definitiva los males que aquejan a la región del Muña.

6.10.9.3. La Sala resalta y pone de presente la Resolución CRA 287 DE 2004 sobre el cobro de la Tasa Retributiva dentro del cargo por consumo para la prestación de los servicios públicos domiciliarios de acueducto y alcantarillado tanto para los suscriptores con caracterización de vertimientos como para los suscriptores sin caracterización de vertimientos (domiciliarios), según las prescripciones de los artículos 4 y 37, siendo la referencia para su cobro la normatividad ambiental.

6.10.9.4. Con relación a la tasa retributiva establecida en el artículo 42 de la Ley 99 de 1993, el MINISTERIO DE AMBIENTE VIVIENDA Y DESARROLLO TERRITORIAL tiene que tener presente para su regulación que el objetivo de la misma, siguiendo las reglas que enseñan que EL QUE CONTAMINA PAGA, es la reducción de la contaminación, por lo cual su monto siempre debe estar precedido del principio del cumplimiento de las metas ambientales para hacer conciente al agente contaminador de la necesidad de tratar en la fuente y la mayor economía que esta inversión le representa frente a la carga de pagar esta tasa, por lo que se hace necesario poner a tono con la realidad que muestra el RÍO BOGOTÁ y sus AFLUENTES, la Resolución que señala los parámetros para la liquidación por la CAR de dicha tasa, la que a su turno debe proceder en forma inmediata a su recaudo, pues en el cumplimiento de esa tarea existe deficiencia en el cobro a las industrias como éstas (Cervecería Leona, entre otras) lo pusieron de presente a la Magistrada Sustanciadora en la visita técnica que practicó, en cuanto se les dificulta su pago porque la autoridad ambiental demora su cobro. Lo propio puede predicarse del DAMA en cuanto ha existido una ineficiente labor sobre ese aspecto.

6.9.10.5. La EAAB debe también tener presente que el cobro de esta tasa también le acarrea la obligación de una gestión eficiente, no pudiendo trasladar los costos de su ineficiencia a los usuarios y serán responsables disciplinaria como penalmente no solo el que tiene a su cargo su dirección sino aquellos a los que le corresponde la ejecución técnica de las obras objeto de pacto, como también habrá lugar a la apertura del incidente de desacato.

6.10.9.6. **Aportes del Distrito Capital por Ley 715.** Ahora bien, para garantizar la ejecución de las obras propuestas (interceptores señalados como la estación elevadora y la PTAR CANOAS), con relación a las observaciones que el DISTRITO CAPITAL hace de la fuente de recursos de Ley 715 de 2001, sobre su afectación por el Consejo Distrital al pago de los subsidios de aguas de los estratos 1, 2, y 3, como también a otras inversiones ambientales, la Sala estima que cabe aquí la misma apreciación con relación a la **proactividad** predicada por la EAAB y que se exige de la Nación, de sus Ministerios y de la CAR, en cuanto no se puede perder de vista que la descontaminación del río y sus afluentes requiere de un **PROGRAMA COMÚN SOSTENIBLE**, en cuanto debe ser **EL PROYECTO PRIORITARIO NO SÓLO DE BOGOTÁ SINO DE TODA LA REGIÓN QUE SE UBICA SOBRE LA CUENCA DEL RÍO BOGOTÁ**. Esta no es una sola afirmación o sentir del tribunal, sino que es la directriz que trazó el Consejo de Estado en la sentencia que invoca la EAAB para decir que no es ella la sola responsable para asumir el costo de las obras que implican su descontaminación, sino todos los actores difusos<sup>41</sup>. Fallo del que se resalta el siguiente aparte

**Como es ampliamente sabido, el paso de los años no ha hecho cosa distinta de señalar a esta arteria fluvial como el centro gravitacional de una verdadera catástrofe ecológica dado que a lo largo de su cause ha desaparecido cualquier rudimento de vida animal, el**

---

<sup>41</sup> Consejo de Estado, sent. 5 de junio de 2001, Exp. No. A.P.-0305-01 Acción Popular/EAAB

**deterioro ambiental ha sido absoluto, ciertamente dramático el desequilibrio ecológico allí evidente, y no menos desastroso los niveles de contaminación biológica, física y química que, vertida a su cauce, se propaga sin remedio a todo lo largo de su curso y hasta el final de su trayectoria.**

**Obsérvese cómo diversos estudios, proyectos de recuperación y propuestas de rescate que obran en el expediente han sido unánimes en señalar no solo las características de la tragedia sino también – algo que mucho interesa en esta contención- las ingentes sumas de dinero que implica una tarea realmente salvadora del Río Bogotá, no sin olvidar el elevado numero de entidades territoriales, y autoridades de gobierno, que tienen algún grado de responsabilidad en la solución de un problema conocido por todo el país desde hace cuando menos cuarenta años.**

**Pero por los exclusivos efectos de la Acción Popular que ocupa la atención de la Sala no es suficiente con recabar en las verdaderas dimensiones de esta autentica tragedia ecológica, examinada desde los puntos de vista humano, técnico y aun científico, todo lo cual arroja guarismos de niveles contaminantes, como ya se dijo, probablemente no conocidos. En sentir de la Sala, tanto o más imperativo que lo anterior resulta probar en qué consiste el cargo central que la demanda formula a la Empresa de Acueducto y Alcantarillado de Bogotá, es decir, dónde radica la omisión de esta entidad para realizar los estudios y adelantar las obras necesarias para controlar las descargas de residuos recolectados en los cuerpos de agua que configuran el Río Bogotá.**

**Como lo dice el Tribunal a- quo, en términos que la Sala comparte y por ello prohíja, lejos de aparecer demostrada en este caso la conducta omisiva de la E.A.A.B, el plenario abunda en pruebas de que, cuando menos desde 1962, esa conducta no ha sido negligente ni irresponsable dado que, en palabras del Tribunal “...la E.A.A.B. ha colaborado y ejecutado firmemente proyectos y obras dentro del sistema de alcantarillado de la ciudad con la finalidad de buscar que los vertimientos que se realizan a los cuerpos de agua (Río Bogotá y sus afluentes) causen el menor efecto ambiental posible”.**

6.10.9.6. Es por todo ello, que para los efectos de la construcción del interceptor TUNJUELO CANOAS que la EAAB no lo tiene proyectado dentro de las tarifas, el DISTRITO CAPITAL deberá realizar una transferencia de recursos superior al 30% del 41% del Propósito General, que alcance a cubrir su terminación.

6.10.9.7. En ese orden, la Sala estima como necesario e imprescindible que el DISTRITO CAPITAL realice la transferencia de los recursos de Ley 715 en un porcentaje superior al 30% del 41% del Propósito General

que le permita a la EAAB construir el interceptor TUNJUELO CANOAS. Igualmente ese porcentaje no podrá ser inferior al 50% del 41% del Propósito General, con destino a la construcción de la Planta de Tratamiento de Canoas (la que como se señalará más adelante se construirá también con recursos del Predial y de Tasa Retributiva) y para su posterior operación en tanto la EAAB pueda asumir este costo con cargo a las tarifas.

6.10.9.7.1. En orden al cumplimiento de esta orden el DISTRITO CAPITAL deberá incluir en su presupuesto del año 2005 dicho porcentaje en la forma aquí dispuesta, lo cual deberá tener en cuenta el CONCEJO DISTRITAL al momento en que se discuta y se apruebe el desmonte de los subsidios de las tarifas del servicio público de Acueducto y Alcantarillado. Aquí cabe reflexionar que según lo dispuesto en la Ley 715, los subsidios no sólo son parte del componente del gasto social, sino el saneamiento básico, por lo que la Sala llama la atención que éste se encuentra por encima del mismo rango de prioridad que aquellos en consideración a que la humanidad está llamada a preservar las fuentes de agua, en cuanto para su subsistencia requieren de ella. Luego mientras exista esa catástrofe ecológica habrá de tenerse en cuenta el rango de los valores en juego.

6.10.9.7.2. Para tales efectos se conminará a la NACIÓN-MINISTERIO DE HACIENDA para que cumpla en forma oportuna Y SIN DILACIONES con la obligación de realizarle al DISTRITO CAPITAL oportunamente la transferencia de los recursos de Ley 715 del 41% del Propósito General.

6.10.9.8. **Aportes de la CAR.** En ese orden, siendo insuficientes los anteriores recursos para la construcción de la PLANTA ELEVADORA DE CANOAS, LA PLANTA DE TRATAMIENTO DE CANOAS y el interceptor CANOAS ALICACHÍN, su costo debe ser cubierto no solo

con las transferencias de ley 715 por parte del Distrito acabada de señalar, sino con las transferencias que la CAR debe hacer al DISTRITO CAPITAL por el 50% del Predial, previa deducción de los costos de ampliación de la PTAR SALITRE, y en lo que reste, serán los recursos por tasa retributiva incluida en las tarifas de la empresa prestataria del servicio los que deben quedar afectos para su construcción.

**6.10.9. Aval De La Nación Para La Consecución De Un Crédito Y Pago De La Tasa De Interés.** En ese orden, teniendo en cuenta la magnitud de las obras que la EAAB está emprendiendo y debe ejecutar en un lapso que no puede sobrepasar al año 2009, se requiere para la aprobación de los correspondientes créditos, que la NACIÓN preste su aval a la empresa en orden a obtenerlos, que como se previó para el Contrato 015 pueden acudir a la pignoración de tales rentas proyectadas en los años según el precio de las mismas, que permita la pronta consecución de los recursos con los que deben ejecutarse las obras. El pago de los réditos de la deuda se hará con cargo a los recursos de la Nación teniendo en cuenta que todas las entidades demandadas han cohonestado con su actuar omisivo a la agravación del daño ecológico como ampliamente ha quedado analizado en esta sentencia, por lo que todas deben contribuir con sus recursos a la restauración de las fuentes de agua afectadas tal y como lo prevé el artículo 34 de la Ley 472 de 1998.

**6.10.9.10. Aportes de Recursos para la Operación y Mantenimiento de la PTAR Canoas por el Distrito Capital y por la CAR y por los Municipios.** De igual manera, para efectos de la operación y el mantenimiento de la PTAR CANOAS se hará con cargo a los recursos por *Ley 715* del Distrito Capital, y con las *transferencias del sector eléctrico a la CAR y a los municipios*, especialmente Sibaté que recibe un porcentaje mayor que los demás, de la siguiente manera: El Distrito Capital aportará el 50% del 41% del Propósito General, la suma que reste

del precio de la operación descontado dicho porcentaje será cubierta por partes iguales por la CAR, el MUNICIPIO DE SIBATE y por los municipios que reciben las transferencias, considerados estos últimos como una sola parte para efectos de dividir en tres partes el saldo.

**6.10.9.11. Operación y Mantenimiento de la PTAR Canoas por la EAAB.** Una vez pagada la deuda por concepto de la construcción de la PTAR CANOAS, la EAAB asumirá su operación y mantenimiento con cargo a las tarifas como lo prevé el artículo 16 de la Resolución CRA 287 de 2004 y con el apoyo de los recursos acabados de señalar. **Con el fin de sostener la inversión realizada y garantizar la calidad de vida a los pobladores de la región, aquí nuevamente cabe RECORDAR que la solución al impacto ambiental que genera la contaminación del RÍO BOGOTÁ no es sólo un problema del DISTRITO CAPITAL sino de toda la REGIÓN (dentro de la cual está incluida la NACIÓN) por lo que de un lado no pueden anunciarse las autoridades a cuyo cargo está solucionarlo como parte integrante de una MESA REGIONAL y de la futura CIUDAD REGIÓN DISTRITO CAPITAL-DEPARTAMENTO DE CUNDINAMARCA, pero a la vez oponerse a contribuir con sus recursos anunciando que es sólo un problema del DISTRITO CAPITAL Y DE LA EAAB, mesa regional que en tal caso sólo pretenderían integrarla para poner objeciones, más no para dar soluciones como lo es el aporte de recursos, por cuanto las metas ambientales sin ello no pasarán de ser solamente eso, METAS.**

6.10.11. Debe dejarse claro aquí que el único responsable de la contaminación en la CUENCA MEDIA no lo es sólo el DISTRITO CAPITAL, que la EABB como ente prestador de un servicio público básico no es la que vierte aguas contaminadas, pues son los pobladores de la región los directos responsables (a los cuales también debe aplicárseles la regla de que el CONTAMINA PAGA, pues de lo contrario no contribuirán al

objetivo que se traza en este proceso, resaltando el expediente que con respecto a los vertimientos industriales el doméstico arriba en un porcentaje superior al 93%, siendo grave el de los carbohidratos, grasas y el cloro de las aguas residuales domésticas), que la conurbación causada por el desplazamiento no tiene origen en las políticas y acciones del Distrito Capital como del Departamento de Cundinamarca, a los que por el contrario la Nación debe brindarles el apoyo necesario como también lo prestó para la construcción del METRO DE MEDELLÍN, el sistema TRANSMILENIO DE BOGOTÁ, Y LOS SISTEMAS DE TRANSPORTE MASIVO DE CALI Y PEREIRA que no tienen la prioridad de las obras que en esta sentencia se señalan, ni la calificación de **“CATÁSTROFE ECOLÓGICA”**, de la que entre otros, ha sido el MINISTERIO DE MINAS Y ENERGÍA el directo responsable de la contaminación que causan las exploraciones mineras a cielo abierto en la Sabana de Bogotá en las zonas de reserva y posteriormente el MINISTERIO DE AMBIENTE VIVIENDA Y DESARROLLO TERRITORIAL al no tomar cartas en el asunto para la suspensión de los títulos y licencias mineras que no se ajusten a las normas ambientales de la Constitución y la ley, pues son los proyectos de la gran minería los que causan los mayores impactos al RÍO BOGOTÁ Y A SUS AFLUENTES, por la sedimentación por escorrentía de los cerros y laderas de las montañas que le hacen perder día a día su condición hidráulica y que es causante igualmente de los desbordamientos del RÍO TUNJUELO, contaminación de la que también es responsable el MINISTERIO DE LA PROTECCIÓN SOCIAL en coordinación con el MAVDT por no gestionar ante el CONGRESO u otras instancias y por conducto del INVIMA una política de producción de detergentes y jabones biodegradables, no persistentes en el agua, para la consagración de una exención tributaria que permita su competitividad en el mercado a quienes los fabrican y el consumo por todos los habitantes no solo de la región sino de todo el país, en cuanto los fosfatos y los Nitratos son los que causan fuertes olores por la eutroficación que se produce por el crecimiento incontrolado del buchón que nace donde funcionan las

plantas de tratamiento de aguas residuales, como también en el EMBALSE DEL MUÑA, lo cual ha implicado unos altos costos de operación para la CAR, que mañana será para los municipios, por ser quienes conforme con las previsiones legales, serán quienes deben entrar a operarlas, e igualmente los vienen causando a la EEB y a EMGESA, quienes son las entidades que en últimas han tenido que soportar una carga económica que no les corresponde sólo por el prurito de señalárseles como los responsables de un proceso de trasvase de las aguas del RÍO BOGOTÁ al embalse, para la generación de la ENERGÍA que se consume en el distrito capital y que sirve de reserva en épocas de caudales bajos para el resto de la REGION o en caso de eventuales atentados al sistema de interconexión eléctrico nacional y cuya generación es fuente de recursos para los entes territoriales aledaños a la fuente hídrica en los términos prescritos en el artículo 45 de la Ley 99 de 1993.

6.10.12. Aquí también, cabe resaltar que las EMPRESAS DE SERVICIOS PÚBLICOS, como la de BOGOTÁ, no pueden asumir costos de obras que no están financiadas mediante tarifas porque ordenárselo sería atentar contra la eficiente prestación de los servicios públicos, máxime que en los diferentes procesos que han cursado en esta Sección del Tribunal ha quedado probado que las utilidades que se invierten en el sistema financiero como los ajustes por inflación a los activos no monetarios están afectos a la ampliación de la cobertura para la prestación del servicio de agua potable y alcantarillado a la población con necesidades básicas insatisfechas, la que en últimas sería quien tendría que soportar la demora en la construcción de las obras de infraestructura que para tales efectos se requiere, si la EAAAB debe asumir el costo tan alto de una obra como la de la PTAR CANOAS, sin olvidar el costo que deben asumir los usuarios de los demás estratos a quienes también les corresponde el pago de la tasa retributiva dentro del

cargo por consumo, y la de la tasa por costo de operación y tratamiento de aguas residuales.

6.10.13. En ese orden, pasando a los demás puntos que plantea el pacto de cumplimiento del DISTRITO, es importante mencionar que la contaminación por las exploraciones mineras en el casco urbano de Bogotá, cuya expedición de la licencia, no es privativa del MAVDT sino del DAMA, de lo que también el DISTRITO CAPITAL es el directo responsable de la sedimentación del río por escorrentía de las arenas de las canteras, como también de los vertimientos de aguas residuales de las industrias, razón por la cual el DAMA debe proceder en forma inmediata a su suspensión o cierre en cuanto no cumplan con la caracterización de los vertimientos dentro de los límites que permite la ley. Como también debe alcanzar las metas de los programas emprendidos o por emprender respecto de todos los PML con todos los sectores de la producción, en especial con las CURTIEMBRES DE SAN BENITO Y DEL SECTOR CÁRNICO DE GUADALUPE, para lo cual caben las observaciones y órdenes que se le imparten en esta providencia al Municipio de Villapinzón, de Chocontá y a la CAR con el fin de acabar con los vertimientos residuales sólidos como la pelambre y demás metales al río, e igualmente por los residuos ruminales.

6.10.14. **El Dragado Del RÍO BOGOTÁ Y DE SUS AFLUENTES.** Dentro de la jurisdicción del Distrito Capital, éste correrá a cargo de la EAAB como lo señala en la propuesta de Pacto de Cumplimiento y fuera de su perímetro urbano como en la Cuenca Alta y Baja correrá por cuenta de la CAR con los aportes de la Nación-Ministerio de Minas y Energía y de Ambiente y Desarrollo Territorial en cuanto son estos los que contribuyeron a la agravación de tal daño a consecuencia de las licencias para la exploración de grandes proyectos mineros.

**6.10.15. Control de Vertimientos de Aguas Residuales por las Alcaldías Locales.** Por otra parte, EL DISTRITO CAPITAL, debe realizar un control más riguroso a través de las ALCALDÍAS LOCALES para evitar el vertimiento de residuos sólidos, escombros, muebles viejos, colchones a los canales de aguas lluvias, así como el vertimiento de aceites quemados procedentes de los cambiaderos de aceite, talleres de mecánica y diagnosticentros a los sumideros de los alcantarillados. Igualmente, el CONCEJO DISTRITAL deberá reglamentar dentro del POT la función que a la Curaduría Urbana le compete en relación con el otorgamiento de licencias de construcción para la operación de las estaciones de servicio (suministro de combustibles y lavaderos de vehículos), en cuanto es un hecho notorio su proliferación en los dos últimos años dentro de la ciudad, de las que se observa que en una distancia no superior a los 200 metros en algunos barrios y vías troncales existen hasta tres según los nombres de las concesionarias entre las que se da la competencia.

**6.11. APROBACIÓN DEL PACTO DE CUMPLIMIENTO DE LA EEB Y DE EMGESA.**

6.11.1. Los reparos que la CAR pone de presente en su escrito de alegatos de conclusión más que obstáculos para la aprobación de las obras propuestas en el EMBALSE DEL MUÑA, reflejan la posición contradictoria de dicha institución frente a las órdenes que ella misma impartió en la Resolución 1027 de 29 de junio de 2000, proferida dentro del expediente 5297/83 (fl. 320, c.1.1.) y que dieron lugar a su aprobación y a la del MUNICIPIO DE SIBATÉ, con la intervención de la Procuraduría Ambiental, en lo que se denominó PLAN DE VIDA MUÑA 2000, el que además de estarse cumpliendo ha sido objeto de reforzamiento con otras obras para controlar el usos de plaguicidas en la fumigación de los zancudos causantes de enfermedades en la piel de los ribereños y pobladores de dicha localidad, los cuales se tornan resistentes

ante la permanencia de los mismos, como también con la desecación de las colas que alinderan al municipio con el fin de establecer una distancia considerable entre el EMBALSE Y EL MUNICIPIO; así mismo, con los corredores verdes que bordearán el embalse, para disminuir los olores fuertes que las aguas sulfurosas y los reservorios de las mismas generan en el municipio, resaltando la Sala que la desecación de las colas implica una menor capacidad de embalsamiento que tiene a su turno incidencias económicas para EMGESA y, como consecuencia, en la generación de los vatios de energía, que, por tanto, se reflejará en el monto de la transferencia de los recursos que por el artículo 45 de la Ley 99 están consagrados a favor de aquellos entes.

6.11.2. Acceder en el sentido pedido es desconocer la contaminación que los actores difusos han venido ocasionando, por lo que no sólo constituye una inequidad y falta de justicia distributiva la construcción de una Planta de Tratamiento de las dimensiones que requiere el EMBALSE DEL MUÑA ÚNICAMENTE A CARGO DE LA EEB Y DE EMGESA, sino que también propicia y cohonesto el incumplimiento de las obligaciones ambientales de todos los que causan los vertimientos residuales como de las autoridades que en forma descuidada han asumido tímidamente su papel de policía ambiental. Por lo demás, en lugar de construirse la PTAR a la altura del sitio del embalse (que también requeriría para su diseñamiento y construcción un tiempo igual al que en que requiere una PTAR para tratar un efluente como el del embalse del Muña), esa petición se considera despachada con la construcción de la PTAR CANOAS que a pocos kilómetros del mismo se levantará, con lo que el impacto ambiental que hoy sufre la región se solucionará no sólo con ella sino con la ejecución de todas las demás obras que se realizarán en la CUENCA ALTA Y MEDIA.

6.11.3. En ese sentido, pretender la construcción de la PTAR por la EEB, hoy por EMGESA, como lo pidieron los actores cuando

instauraron sus demandas, pero que después del trabajo laborioso de demandantes (con excepción del apoderado del señor GUSTAVO MOYA quien en sus alegatos de conclusión insiste en que su pretensión debe ser resuelta en el sentido pedido, pero que no asistió a la mayoría de las mesas de trabajo pues en su lugar si estuvo presente la cónyuge supérstite del demandante quien aprobó la fórmula de solución técnica integral y de cuya asistencia existe la constancia en las respectivas actas) y demandados para buscar las soluciones al grave problema ambiental durante las mesas de trabajo que cada uno de ellos tuvieron oportunidad de presidir para mostrar sus debilidades y fortalezas en orden a emprender una tarea tan descomunal como la que implica la descontaminación del RB y sus afluentes.

**6.11.4. De La Cosa Juzgada.** En consideración a todo lo expuesto en este fallo, no puede ser materia de cosa juzgada las decisiones que se impartieron en la sentencia de 3 de septiembre de 2000 del Tribunal Superior del Distrito Judicial de Bogotá, Sala Civil, que revocó la de primera instancia de 16 de diciembre de 1997 proferida por el Juzgado Cuarto Civil del Circuito de Bogotá dentro la Acción de Tutela instaurada contra la EMPRESA DE ENERGÍA DE BOGOTÁ, en cuanto, se advierte que en ella no se le impuso tal orden, como de la lectura de la parte resolutive en consonancia con la motiva se extrae, de otra parte porque en un corto lapso de tiempo cualquier tratamiento que se implemente sin que todos los obligados a reparar el daño ingresen a los procesos de producción más limpia y sin que los vertimientos domésticos sean fuente de transporte de fosfatos y nitratos que en últimas se depositan en el embalse, se concluye, la sola construcción de dicha PTAR no será SALVAGUARDA DE LOS DERECHOS COLECTIVOS DE LOS POBLADORES DE SIBATÉ.

6.11.4.1. Fuera de lo anterior, y aunque el proceso que dio lugar a la acumulación de los demás que se relacionan con la descontaminación del RB y sus afluentes lo fue la Acción Popular de GUSTAVO MOYA

ÁNGEL relacionado con la protección del EMBALSE, lo resuelto con relación a ese tema por la justicia ordinaria civil en la acción de tutela aludida, no CONSTITUYE COSA JUZGADA en este proceso de Acción Popular frente a las demás partes que no intervinieron en ella, en últimas por que la resolución que a la EEB se le hubiere impartido, de existirla, de construir la PTAR, no es la solución a la CATÁSTROFE ECOLÓGICA que el superior jerárquico de este tribunal puso de presente al absolver de responsabilidad a la EAAB por la contaminación difusa de que otros son sus responsables.

6.11.4.2. Debe resaltarse que la interposición de la excepción de COSA JUZGADA por la CAR pone en evidencia su FALTA DE COMPROMISO COMO PROMOTORA DE SU FUNCIÓN AMBIENTAL, lo cual también cabe predicarse del MINISTERIO DE AMBIENTE VIVIENDA Y DESARROLLO TERRITORIAL CUANDO PROPONE UNA NULIDAD que no existe, pues si como quedó analizado, tales actuaciones por los órganos encargados de remediar la CATÁSTROFE ECOLÓGICA que representa el RÍO BOGOTÁ deja mucho que dolerse por quienes sufren día tras día, año tras año, los padecimientos de la contaminación del medio ambiente en donde viven y laboran.

6.11.5. Continuando con la propuesta de algunas personas sobre la orden para impedir el trasvase de las aguas contaminadas al EMBALSE DEL MUÑA y el desembalse de las mismas, es pertinente poner de presente las consecuencias nocivas para la Cuenca Baja, no solo económicas sino ambientales que tal decisión trae aparejas, como también viene al caso mencionar los beneficios que su funcionamiento comprende según los estudios de la UNIVERSIDAD DE LOS ANDES anexos al expediente, consecuencias que fueron puestos de presente a lo largo de las diferentes mesas de trabajo, y contra los cuales no existe otra prueba técnica que los desvirtúe, prueba de la que si bien para efectos de

su análisis y valoración debe tenerse en cuenta que proviene de la directamente enjuiciada EMGESA, no es menos cierto que es a ella a la que según los trámites para la continuidad de la licencia ambiental que le ha sido concedida, a quien le correspondía allegar en orden a demostrar los efectos que al medio ambiente se pueden llegar a generar y que son parte de los estudios de impacto ambiental que debió o debe presentar ante la autoridad competente, la que a su turno, con los expertos en la materia de que dispone en su planta de personal, es la encargada de examinarlos y de realizar las objeciones o su aprobación, sin que hasta la fecha de proferimiento de esta sentencia hubiese aportado un estudio, como se acaba de señalar, que demostrara en contrario. Así indica el estudio de la universidad:

#### **6.11.5.1. “Impacto Ambiental Por La Suspensión Del Bombeo Al Embalse Del Muña**

“La degradación de la calidad del agua del Río Bogotá como del Embalse del Muña, ha sido un proceso paulatino en el tiempo e integral entre los dos cuerpos de agua. La eventual mejora de la calidad de agua del río, una vez que se implementen los planes de saneamiento de las Cuencas Alta y Media, mejorará inmediatamente la calidad de agua del embalse. Actualmente el Embalse del Muña forma parte importante del plan de tratamiento integral de la cuenca del Río Bogotá. Los efectos benéficos que hoy en día está teniendo sobre la calidad del agua en la cuenca baja del río, imposibilitan la suspensión de actividades de bombeo ya que esto generaría problemas mayores.

“El Embalse del Muña, gracias a su papel de degradación de materia orgánica, retención de sedimentos y aireación del flujo en las centrales de generación eléctrica, genera efectos importantes sobre la calidad del agua que sale del embalse y es nuevamente puesta en el cauce del río.

“Como primera medida, el embalse se encuentra sedimentando de metales pesados en la zona de Alicachín, donde son concentrados y al mismo tiempo removidos del agua contaminada entrante al embalse. En el caso de que estos metales no fueran removidos del agua proveniente de la Ciudad de Bogotá, el uso de ésta se vería altamente restringido, incluso para actividades de riego, de las cuales la población actual saca provecho para su economía.

“La suspensión de las actividades de bombeo evitaría que estos metales fueran removidos del agua, y el paso directo del río hacia poblaciones aguas abajo, produciría efectos nocivos sobre la salud y el medio ambiente.

“En segundo lugar, y tal vez con un impacto ambiental más inmediato, la suspensión del bombeo generaría una liberación de gases disueltos en las aguas del Río Bogotá inmediatamente aguas abajo de las compuertas de Alicachín a causa de la gran turbulencia del flujo en las caídas, principalmente en el Salto del Tequendama. Esto tendrá el efecto de generar una alta acumulación de gases (sulfuro de hidrógeno, tricloroetileno, percloroetileno, naftaleno) lo cual representa un peligro para la salud pública obligando en ciertas horas y en ciertos días del año al cierre de la carretera que desde Alicachín conduce a la población de Mesitas del Colegio, y eventualmente al desplazamiento de los pobladores de las cercanías al río entre Alicachín y el actual sitio de descarga de la estación generadora La Guaca.

#### “CONCLUSIONES:

- “No es conveniente suspender los bombeos por cuanto los impactos ambientales generados aguas abajo de las compuertas de Alicachín, a lo largo del cauce del Río Bogotá, con las

condiciones de calidad de agua actuales, serán altamente perjudiciales.

- “Por las malas condiciones de agua a la altura de Alicachín y en especial a lo que se refiere a compuestos malolientes y otros compuestos orgánicos volátiles, se generaría un alto impacto negativo en los alrededores del cauce natural del Río Bogotá, aguas abajo de Alicachín, ya que estos compuestos serían emitidos por el río en grandes cantidades debido a la alta turbulencia que tiene el agua al correr por el cauce natural en este tramo.
- “La calidad del agua en el Río Bogotá en términos de oxígeno disuelto y BDO entre Alicachín y la descarga de la cadena Paraíso - Guaca, en caso de que se suspenda el bombeo al Embalse del Muña, sería inferior.
- “El Embalse del Muña funciona como un sedimentador actualmente y remueve un porcentaje de la DBO, que es superior al que removería el río en su proceso de auto depuración al seguir el agua por su cauce natural.

## I IMPACTO DEL CIERRE DE BOMBEO AL EMBALSE DE MUÑA EN EL SIN

Lo primero que destaca, es la herramienta a utilizar: *El DigSilent Power Factory* efectuando diferentes simulaciones con condiciones de generación y de disponibilidad de la red de transmisión nacional para los años 2004, 2005, 2006 y 2007.

“De otra parte, el análisis energético se realiza con la herramienta MPODE simulando el Sistema Interconectado Nacional con todas sus cadenas hidráulicas y las restricciones de la red, para un horizonte de 10 años.

#### “CONCLUSIONES:

- “Por lo anterior y, de los estudios eléctricos concluye que para los casos analizados entre el 2004 a 2006, el no contar con la generación de Paraíso – Guaca por el cierre del bombeo hacia el Muña y con despacho de generación en Guavio y Chivor con 2000 MW se presentaría un racionamiento en el área oriental por condiciones de baja tensión y sobre cargas de transformación. Empero, es de tener en cuenta que la generación de las menores no está completamente garantizada dado que son plantas filo de agua que dependen del flujo del río Bogotá y la generación de la planta térmica, como cualquier planta, tampoco está completamente garantizado el 100% de su disponibilidad.
- “Como consecuencia de todo lo expuesto y, ante la indisponibilidad adicional de una unidad de Chivor-Guavio se presentarían racionamientos adicionales a los casos anteriores entre 20 y 50 MW. De otra parte, la disponibilidad promedio de las plantas en el año 2003 fue superior al 90%, sin embargo, la planta Chivor durante el mes de mayo de 2004 sufrió una indisponibilidad total por avalancha de los ríos afluentes al embalse Esmeralda.
- “A más de lo anterior, la sensibilidad a la contingencia de los circuitos Guavio – Tunal y Guavio muestra que entre los años 2004 y 2006 se podrían presentar racionamientos entre 550 y 610

MW. Para el año 2007 el racionamiento sería de 250 MW aún contando con la entrada del proyecto a 500 KV Primavera Bacatá. Por lo anterior, se recomienda analizar la posibilidad de adelantar la entrada en servicio del proyecto a 500 KV Primavera – Bacatá ya que podrían disminuir las demandas no atendidas en el área oriental al obtener mejores perfiles de voltaje y alivio de los problemas de sobrecargas en transformación.

- “El cierre del bombeo al embalse del Muña y sus efectos colaterales, generación obligada en Guavio y Chivor, Miel 1 y ZIPAS, conlleva a un deterioro de la confiabilidad del sistemas, el cual presenta una mayor magnitud a partir del Verano 2010-2011.
- “Ante el deterioro de la confiabilidad en el Largo Plazo, concluye que es necesario contar con una capacidad adicional para sustituir la energía no generada por Paraíso y La Guaca.

**6.11.6. La Denuncia Del Pleito A La Car.** Los antecedentes muestran que bajo esa concepción de la contaminación difusa no es posible acceder a las súplicas de la DENUNCIA DEL PLEITO que la EEB le incoa a la CAR en cuanto la ley no la ampara para que ésta salga a responder por las pretensiones que le han sido formuladas, en consideración a la existencia de un concurso de culpas por parte de los actores directos que realizan los comportamiento de vertimientos residuales, sino porque también la EEB participa en el producción del daño porque también fue permisiva al no actuar desde el mismo momento en que empezó a advertirla, como así se lo permitían las normas del Código Civil, a las que acudieron los actores populares para adelantar las presentes acciones ante la indolencia de quienes representan el Estado de Derecho.

6.11.7. **Los Llamamientos En Garantía a las Industrias.** De igual manera, y por las mismas razones las Sala negará el Llamamiento En Garantía que respecto de las industrias formula EMGESA en cuanto la indemnización que estas debe provenir será la que tienda a reparar el daño ambiental.

6.11.8. **Llamamiento En Garantía A La Aseguradora.** Finalmente, en lo tocante al Llamamiento En Garantía que la EEB hace a la COMPAÑÍA DE SEGUROS la NACIONAL S.A. hoy ASEGURADORA COLSEGUROS S.A., la Sala lo negará con la sola razón de la falta de uno de los **elementos esenciales** para la existencia del contrato de Seguro, cual es el RIESGO ASEGURABLE, del cual LA INCERTIDUMBRE DE SU CAUSACIÓN ES CONDICIÓN SINE QUANON DEL MISMO, y si este era la contaminación de las aguas materia del trasvase, éste para la fecha de suscripción de la Póliza de Seguro No. 024108, en la que si bien se ampara el riesgo por la contaminación del medio ambiente hasta por \$150.000.000, durante la vigencia de la póliza, no alcanza el amparo, realización del riesgo del que no es la EEB su causante, en cuanto el siniestro ya se había causado para la fecha en que se celebró el contrato, lo que de suyo conduce a la negación de la condena a cargo del asegurador, según los términos de los artículos 1045 y 1054 del Código de Comercio.

6.11.9. **De la Operación de las Obras Propuestas en el Numeral 6.10.4.3. por la EEB y por EMGESA en el Embalse del Muña.** Como EMGESA se duele de la falta de inversión por parte de la CAR y de los MUNICIPIOS de los recursos que por transferencias del sector eléctrico realiza a estos entes, por lo que en su pacto propone la operación y mantenimiento de las obras del embalse a que hace referencia hasta el año 2006, la Sala estima que en consideración a todas las obras que los municipios como la CAR deben realizar hasta el año 2009 para construir y terminar sus Planes Maestros de Alcantarillado y posteriormente a esto

para contribuir con la operación y mantenimiento de la planta de tratamiento de aguas residuales de Canoas, se hace necesario, en consideración a los beneficios que recibe por el trasvase las aguas que EMGESA y la EEB asuman la operación y mantenimiento de las obras a que se refiere el numeral 6.10.4.3. (Dragado y disposición de lodos, Operación y mantenimiento de sistemas de aireación, Cosecha y disposición de buchón), de la siguiente manera: la primera hasta el año 2007 y la segunda hasta el año 2009 como la Magistrado Sustanciadora lo solicitó a los representantes legales dichas entidades al discutirse sus propuestas de pacto.

6.11.10. Atendiendo a que después del año 2009 la operación y mantenimiento de la PTAR CANOAS implica unos menores costos si se tiene en cuenta el conjunto de acciones y de obras por parte de todos los demandados, en especial por parte de los pobladores de las CUENCAS ALTA Y MEDIA, un porcentaje de los recursos por transferencias del sector eléctrico, descontado el que irá para la PTAR CANOAS para su operación y mantenimiento, deberá ser destinado por la CAR, el MUNICIPIO DE SIBATÉ y por los demás MUNICIPIOS a la operación y mantenimiento de las obras que demande el EMBALSE DEL MUÑA.

6.11.11. *Control De Zancudos En La Región Aledaña Al Embalse Del Muña.* Finalmente y en lo que respecta a la salvaguarda del derecho colectivo a gozar y disfrutar de un ambiente sano por parte de los pobladores de la REGIÓN ALEDAÑA AL EMBALSE DEL MUÑA, la Sala estima pertinente dejar abierta la posibilidad de acudir a otras alternativas para el control de los zancudos diferentes a la fumigación del cuerpo de agua, os cuales se han tornado resistentes, alternativa, que de otra parte, no está prevista en la ley ambiental para aplicar sobre un recurso hídrico, pudiendo acudir al uso no sólo las lámparas electrocutoras como innovación tecnológica puesta de presente en las mesas de trabajo dentro de las investigaciones que sobre tal problemática se continuán adelantando, sino que también se debe contemplar la

posibilidad de realizar el cerramiento total del PERÍMETRO DEL EMBALSE con angeo para impedir la salida de los zancudos hacia la atmósfera en el ciclo de su reproducción, dejando claro que ésta sugerencia no constituye una idea utópica del tribunal, en cuanto lo que en últimas se pretende es aliviar el constante sufrimiento de la población en corto plazo mientras se disminuye la contaminación del RÍO BOGOTÁ Y DEL EMBALSE DEL MUÑA y de la PTAR CANOAS, insistiendo y dejando claro que la construcción de una PTAR antes del trasvase también conlleva un tiempo que no será inferior al previsto para la construcción de la primera en consideración al tamaño de la obra y que a la final, se insiste, será insuficiente mientras no se ejecuten las acciones en toda la CUENCA ALTA Y MEDIA.

6.12. DE LA APROBACIÓN DEL PACTO DE CUMPLIMIENTO DE LA CAR. Bajo todas las consideraciones anteriores y con las órdenes impuestas en lo que respecta con los procesos de producción más limpia de las curtiembres de Villapinzón y Chocontá, la reforestación de los cerros y laderas de la Sabana de Bogotá y en los municipios de su jurisdicción, de los que en primer término son responsables quienes han explorado y explotado los recursos naturales con la consiguiente causación del daño ambiental por el incumplimiento de sus obligaciones, la sala impartirá la aprobación a sus propuestas de Pacto de Cumplimiento, con la observación, como quedó en aparte anterior, que son los particulares los mayores responsables de la deforestación y contaminación, por lo que son contra ellos los que la CAR y el MAVDT deben enfilar, al igual que contra todos los responsables de los demás procesos de producción, sus actuaciones so pena de quedar incursos en desacato a fallo judicial como en las demás conductas que la ley penal y disciplinaria consagran, tal y cual así quedó dispuesto.

6.12.1. De igual manera, deberá acatar la orden que al DAMA como a la EAAB en este fallo se les imparte tendiente a una adecuada destinación

de los recursos para la adquisición de predios con el fin de proteger los nacimientos de las fuentes hídricas de la cuenca, máxime en atención a la prioridad de la descontaminación, por lo que tales autoridades deberán acudir delantadamente a exigir de sus propietarios el respeto por las zonas de páramos. Aquí cabe insistir en el control del uso indiscriminado de plaguicidas por parte de los papicultores en el Páramo de Guachetá, debiendo proceder a compulsar copias para ante la Fiscalía General de la Nación para quienes continúen y se tornen renuentes con el cumplimiento de esta orden como en párrafos anteriores se dispuso.

6.12.2. Se reitera igualmente el cumplimiento de sus obligaciones sobre la transferencia de los recursos del predial para la ejecución de las obras a cargo de la EAAB y del DISTRITO CAPITAL.

6.12.3. La CAR debe promover y controlar en el área rural el cercamiento por parte de los propietarios de las fincas para alindarlas de las zonas de ronda con el fin de impedir el rebaje de las aguas del río Bogotá, como también para proteger las fuentes hídricas del paso del ganado a las mismas, lo que propicia su contaminación por la materia orgánica que eliminan los animales.

6.12.4. Así mismo, al igual que el DAMA debe demostrar resultados al tribunal cada tres meses sobre su gestión en los procesos de producción más limpia, la que apenas se muestra incipiente y en la que no se advierte una acción permanente sobre todo con las CURTIEMBRES DE VILLAPINZÓN que dentro del ámbito de su jurisdicción es al igual que el río Bogotá un proyecto prioritario no sólo para proteger el medio ambiente sino para impulsar el desarrollo de la región sino el de una Nación entera, netamente agrícola, pobladores de los que día a día se ven más desocupados y desplazados en las calles porque a falta de trabajo nada tienen para sobrevivir, optando por radicarse en la ciudad capital de los colombianos donde pueden conseguir en las esquinas de un semáforo

unos pesos para remediar su hambre, sin que los funcionarios que presiden ese ESTADO INDOLENTE se preocupen por proteger la riqueza natural que DIOS brindó a nuestro país, dejándonos el flagelo de la guerra interna a la que unos y otros debemos ponerle remedio más que con las armas, con el cumplimiento cabal de las funciones a las que nos obligamos cuando ingresamos a ese Estado de Derecho y pasamos a presidirlo.

#### 6.16. DE LA APROBACIÓN DE LOS PACTOS DE CUMPLIMIENTO DE LOS MINISTERIOS Y DEL DEPARTAMENTO DE CUNDINAMARCA.

6.16.1. Bajo el cumplimiento de las funciones que a cada uno les corresponde de colaboración y cooperación en los planes de gestión ambiental que promueven los municipios, el MAVDT y la CAR, se imparte la aprobación con la advertencia de la constitución de un comité que en forma coordinada vigile el cumplimiento de las obligaciones que contraen con los pactos de cumplimiento que registraron, en especial por parte del MINISTERIO DE MINAS ENERGÍA con relación a los títulos mineros que expidió en su momento como autoridad minera.

6.16.2. A ese respecto, el MINISTERIO DE AMBIENTE, VIVIENDA Y DESARROLLO TERRITORIAL deberá proceder dentro de un término no superior a los seis (6) meses contados a partir de la notificación de esta sentencia, a determinar las zonas de exclusión de la minería dentro de la CUENCA DEL RÍO BOGOTÁ, atendiendo a las prescripciones del artículo 34 de la Ley 685 de 2001, en consonancia con el artículo 5 de la Ley 99 de 1993, de acuerdo con la función que esta última disposición le adscribe como autoridad ambiental y con la colaboración de la autoridad minera (colaboración que no limita ni condiciona el ejercicio de la competencia de la autoridad ambiental quien es la que puede establecer las zonas de exclusión), que no sólo se contraen a las zonas

enumeradas en el inciso segundo del artículo 34 (sistema de parques nacionales naturales, parques naturales de carácter regional y zonas de reserva forestal), sino a todas las demás, en cuanto la frase del artículo 36 de la comentada ley, “*de conformidad con los artículos anteriores*” fue declarada inconstitucional por la Corte Constitucional mediante sentencia C 339 de 2002, decisión que estriba en el desconocimiento de las leyes que protegen zonas distintas a las que se mencionan en el artículo 34, tales, los ecosistemas integrados por vegetación original que no siempre forman parte de parques naturales y de otras como las que se mencionan en la aludida sentencia.

6.16.3. De otra parte, en orden a procurar el cumplimiento de las obligaciones del Distrito Capital como de los municipios, el FONDO NACIONAL DE REGALÍAS y EL MINISTERIO DE HACIENDA Y CRÉDITO PÚBLICO deberán realizar las correspondientes reservas de los dineros por concepto de REGALÍAS, cancelando las que se causaron y que fueron objeto de reclamo por parte de los entes territoriales que hasta la presente se les adeudan, debiendo proceder a realizar las correspondientes apropiaciones en el presupuesto de gastos del FONDO NACIONAL DE REGALÍAS, para continuar cumpliendo de manera oportuna y sin dilaciones las transferencias por este concepto a los municipios como al Distrito Capital, por cuanto cualquier retardo incidirá en la ejecución de las obras que con tales recursos se proyecten.

6.17. DE LA OBJECCIÓN AL DICTAMEN PERICIAL. En esa forma quedan resueltas las pretensiones de las demandas radicadas bajo los Nos. 479- 0122 y 428, dejando claro que las objeciones al dictamen pericial presentado por FABIO ROBERTO PÉREZ Y JOSÉ MANUEL GONZÁLEZ NAVARRO quienes con los mismos criterios de las investigaciones adelantadas por la UNIÓN TEMPORAL y las demás

entidades expertas en el tema, en los cuales se basaron para poner de presente las condiciones anóxicas de las aguas que se trasvasan al EMBALSE DEL MUÑA, pero que con relación a la alternativa para la solución de la descontaminación se refieren a los estudios que en el año 1993 realizó la EPAM para dictaminar sobre la necesidad de la construcción de las restantes Plantas de Tratamiento a la altura de los RÍOS FUCHA Y TUNJUELO, aspecto este que quedó dilucidado por las conclusiones a las que llegaron quienes integraron la MESA DE SOLUCIÓN TÉCNICA INTEGRAL DEL RÍO BOGOTÁ, esto es la de dos plantas, alternativa acogida en atención a las condiciones cambiantes de la CUENCA y que por lo demás fue contemplada en los estudios de la EPAM entre otras, por lo que en ese aspecto prospera la objeción, no como un error grave de parte de los peritos sino como valoración de las pruebas de la que le merece mejor grado de convicción (no de certeza como lo pretende la CAR -la cual ni si quiera la ha tenido en la toma de sus decisiones individuales-, habida cuenta que el proceso si bien tiende hacia la búsqueda de la verdad verdadera o real, resulta casi un imposible exigirle al juez un grado de certeza en su decisión como los doctos de la materia procesal lo tienen decantado, más en el asunto que se trata, con el que resulta probado que son las acciones u omisiones de todos y la falta de recursos son los que han llevado al desastre ecológico, recursos que hasta la presente no han invertido en la forma dispuesta en la ley pretendiendo aún invertirlos en otras necesidades que no son de la gravedad del daño que se examina, o invocando, como en otros casos, que no cuentan con los mismos) para acoger los estudios de los expertos allegados por las partes y no la prueba que tardíamente y después del transcurso de más de diez años desde que se inició el proceso vienen a presentar quienes fueron designados por el juzgado que inicialmente conoció del proceso, prevaleciéndose de los estudios de los demás entes, más no por un trabajo de investigación como se advierte de los argumentos que exponen en su experticio, razón que conduce a la Sala a no reconocer en su favor los honorarios por un trabajo realizado a expensas, se insiste de unos estudios ya elaborados.

6.18. DEL DRAGADO DEL RÍO Y SUS AFLUENTES correrá por cuenta de la E.A.A.B. en la franja de los ríos y en los términos y plazos que tiene presupuestado y de la CORPORACIÓN AUTÓNOMA REGIONAL DE CUNDINAMARCA CON LA COFINANCIACIÓN DEL MINISTERIO DE MINAS Y ENERGÍA Y DEL MEDIO AMBIENTE en el territorio de la jurisdicción donde han sido concedidas las respectivas licencias de las exploraciones mineras causantes de la erosión de las montañas y laderas, por ende de la escorrentía y de la sedimentación del RÍO Y SUS AFLUENTES, dragado del que los lodos serán depositados en el lugar que determinen las autoridades ambientales involucradas.

6.19. DE LAS PRETENSIONES DE LA DEMANDA INTERPUESTA POR EL DOCTOR JORGE ENRIQUE CUERVO RAMÍREZ. En consideración a las respuestas dadas por los peritos en su escrito de aclaración y teniendo en cuenta la respuesta dada por la CAR en cuanto a la necesidad de la licencia ambiental para los proyectos de infraestructura de las entidades territoriales, es a ésta a la que le ha correspondido su expedición en lo que concierne al territorio de su jurisdicción y, al DAMA dentro del casco urbano de Bogotá; por lo que las obras realizadas por la EAAB en materia de interceptores y alcantarillados, en los casos en que esté invadiendo la zona de ronda de los ríos y quebradas que se señalan, las ha hecho en razón a las cambiantes determinaciones sobre la extensión de tal franja en el POT del distrito y frente a realidades y necesidades ya causadas por las urbanizaciones autorizadas por el DEPARTAMENTO DE PLANEACIÓN hoy por la CURADURÍA URBANA, quienes para los efectos, con el concurso de la EAAB deben procurar incluir dentro de sus planes, la corrección de los trazados de dichas obras, en todo caso una vez se emprendan y ejecuten las que han sido señaladas como prioritarias deberán proceder en el sentido pedido y ajustado a la protección de la zona de ronda. En cuanto a las personas

que la estén invadiendo, será el DAMA quien debe proceder a su protección con el correspondiente desalojo de quienes la invaden bajo el respeto de los derechos de las clases menos favorecidas con quienes, previamente, deberá propiciar su reubicación gestionando convenios interadministrativos con los órganos de la administración distrital y nacional que pueden contribuir mediante unos planes de vivienda, como también con la gran industria y con la BENEFICENCIA DE CUNDINAMARCA, la que ha sido llamada como parte en este proceso, que por su objeto social debe contribuir con sus bienes a reubicarlos, tarea de este ente con las clases más débiles o personas que merecen la protección del Estado antes que tratarlas como a cualquier delincuente, pues ha sido precisamente sus necesidades básicas insatisfechas las que las han llevado a buscar cualquier rincón en donde resguardarse más que su intención de violar los derechos colectivos, protección que el Estado en este caso el Departamento de Cundinamarca ha querido brindarles al crear dicho órgano para la beneficencia y no con ánimo de lucro, sobre la cual esta Sala tuvo ocasión de pronunciarse en la sentencia de 21 de junio del que corre en el expediente 01-369, Actor Humberto González y Otros.

6.19.1. Ahora bien, con relación a los vertimientos que de las aguas residuales viene haciendo la EAAB sobre los diferentes acuíferos interiores del D.C. ésta deberá proceder en el menor tiempo posible a redireccionarlos buscando en todo momento por velar por que se recupere su cuenca, así como las aguas que por ellos circulan. El DAMA deberá por su parte realizar todas las gestiones que como autoridad ambiental le corresponden para procurar el cumplimiento de esta orden, teniendo en cuenta que la descontaminación de dichas fuentes hídricas es determinante para la descontaminación del RÍO BOGOTÁ.

6.20. DE LAS CONDENAS E INDEMNIZACIONES PRETENSIONADAS EN LAS DEMANDAS INCOADAS POR GUSTAVO MOYA ÁNGEL Y MIGUEL ÁNGEL CHAVEZ. En el expediente consta la separación de dichas pretensiones que se están tramitando bajo el proceso de ACCIÓN DE GRUPO en razón a la indebida acumulación de pretensiones, que de no haberse subsanado dicho defecto hubiesen conducido al traste con las demás pretensiones principales materia de la Acción Popular.

6.20.1. En cuanto a la recompensa que el actor (Gustavo Moya Ángel, ) reclaman con fundamento en lo preceptuado en el artículo 1005 del Código Civil, hoy su apoderado, en una suma **“que no sea inferior de la décima parte ni exceda la tercera parte del valor de las obras necesarias que la demandada tenga que realizar para efectuar el previo tratamiento de las aguas negras que deposita en el “Embalse del Muña”,** baste decir que no ha sido la **diligente actividad de apoderado** la que ha llevado a la toma de decisiones como las que se adoptan en esta sentencia, sino la ingente labor de esta corporación para buscar un remedio en forma definitiva a la contaminación del río que como lo señala el Consejo de Estado en el fallo del que se transcriben algunos apartes, resulta ser **“una tarea realmente salvadora del Río Bogotá, no sin olvidar el elevado numero de entidades territoriales, y autoridades de gobierno, que tienen algún grado de responsabilidad en la solución de un problema conocido por todo el país desde hace cuando menos cuarenta años”**, responsabilidad de la que sólo fueron consientes todos los que con sus conductas activas o pasivas dieron lugar a esa catástrofe, cuando mediante la labor que día a día cada uno fue desplegando en las innumerables mesas de trabajo, como en la discusión a las distintas propuestas de Pacto de Cumplimiento, en orden a buscar una solución y participación integral, para que la acción o acciones solitarias de cada uno de los implicados como sus obras, a la postre en

nada lleguen a producir un efecto que impacte sobre la descontaminación del río y su afluentes se llevado el proceso hasta en estado de proferir sentencia, pero contando ya con la promesa de trabajar por la descontaminación del río.

6.20.2. De todo lo cual, resulta ostensible que la declaración favorable de semejante pretensión, pasaría a ser UN DESAGRAVIO PARA LA MISMA NATURALEZA, cuando el paso de los años, sin la actividad de quienes promovieron el proceso, precisamente con el auge de la conurbación y de la actividad industrial en todos los sectores de la producción son los que agravaron el daño, pues lo que comenzó siendo apenas un problema ambiental pasó a convertirse en una CATASTROFE ECOLÓGICA, la que nosotros los mismos jueces con potestad jurisdiccional del Estado para resolver el conflicto hemos debido solucionar a su debido tiempo en forma integral mediante el llamamiento oficioso que debía hacer el a quo, según la previsión del artículo 51 del Código de Procedimiento Civil a todos los que por acción y por omisión eran los llamados a restaurar el daño causado.

6.20.3. Lo propio puede decirse respecto de las indemnizaciones que los demás actores reclaman en los términos del aludido artículo 1005 del Código Civil y demás normas concordantes.

6.21. DE LA ABSOLUCIÓN A LA COMISIÓN REGULADORA DE AGUA POTABLE, EL INSTITUTO GEOGRÁFICO AGUSTÍN CODAZZI Y LA SUPERINTENDENCIA DE SERVICIOS PÚBLICOS DOMICILIARIOS. En cuanto a dichas entidades se concluye que no han incurrido en ningún comportamiento activo ni omisivo que vulnere los derechos colectivos invocados, por el contrario, la primera fue citada en

razón a la función que le compete de regular las tarifas de los servicios públicos, para que estudiara y decidiera sobre la inclusión de la Tasa Retributiva dentro de la tarifa del servicio público de acueducto y alcantarillado, la cual fue incluida en la Resolución CRA 287 DE 2004 y, en cuanto a la segunda sus funciones se subsumen dentro de las que hoy ejerce el IDEAM en lo que al compendio de la información geográfica para efectos de la RED HIDROMETEREOLÓGICA concierne y respecto de la última si bien es cierto le compete la vigilancia de las empresas prestatarias de servicios públicos, dentro de sus funciones no está la de la descontaminación de los recursos hídricos, que por demás para el caso de la toma de aguas de éstos, las mismas están siendo adecuadamente tratadas por la EAAB a los usuarios del servicio. Por todo lo cual se les absolverá de las pretensiones.

6.22. DE LA LEGITIMACIÓN EN LA CAUSA POR PASIVA DE LA SOCIEDAD BOGOTANA DE AGUAS SUEZ LYONNAISE DES EAUX DEGREMONT E.S.P. S.A. PARA RESPONDER A LAS PRETENSIONES. Es de resaltar que su comportamiento en la cantidad del efluente a que se comprometió a tratar en el contrato 015, de 4 metros cúbicos por segundo, fue el que siempre trató, por lo que no se encuentra razón para que por vía de la Acción Popular se le impartan órdenes de un contrato terminado en forma unilateral por el Distrito Capital, que por lo demás correspondía al fuero de su competencia por ser quien celebró el contrato y en consideración a la necesidad de ampliar la capacidad del tratamiento, aplicando la cláusula exorbitante, a la que acudió como una de las prerrogativas consagradas por la ley de los contratos estatales bajo la justificación sobre la conveniencia de adoptar tal decisión, dejando claro que su legalidad corresponde ser examinada por el juez ordinario y no por el constitucional, que para el caso tiene la competencia para impartir órdenes tendientes a la salvaguarda de los derechos colectivos

6.22.1. **Del subdimensionamiento de la PTAR SALITRE desde el mismo momento en que se realizaron y aprobaron los diseños de su construcción.** Sin embargo, no puede pasar desapercibido la Sala que los estudios de la EPAM como lo pone de presente el Asesor Técnico del Procurador Tercero Judicial para este proceso, ingeniero CARLOS ALBERTO ECHEVERRY quien en su INFORME TÉCNICO SISTEMA INTEGRAL DE TRATAMIENTO RÍO BOGOTA Y EMBALSE DEL MUÑA, al referirse a las alternativas que fueron materia de estudio a consecuencia de la recomendación emitida en el año de 1906 por la firma inglesa Pearson sobre la depuración de las aguas residuales de la ciudad antes de vertirlas al RÍO BOGOTÁ, pone de presente la forma irregular como se hicieron los diseños de la PTAR SALITRE por parte de la sociedad francesa concesionaria y la celebración del contrato 015, desconociéndose los estudios de la EPAM sobre la capacidad de la misma para tratar un efluente superior para el que fue construida.

6.22.2. Como antecedentes para la construcción de la PTAR SALITRE, el ingeniero ECHEVERRY refiere que dicha recomendación sólo fue atendida hasta el año de 1993, cuando se integró un comité interinstitucional con la participación de la Nación y del Distrito Capital, que dieron lugar a la contratación de varios estudios dentro de los cuales se destaca el de la firma EPAM LTDA. *“Estudios y proyectos Ambientales para la Empresa de Acueducto y Alcantarillado de Bogotá”*, entregado a FONADE el 18 de junio de 1993, los cuales identificaron 16 alternativas para el tratamiento de las aguas residuales, para lo cual se tuvieron en cuenta aspectos tales como la *caracterización del problema*, la *evaluación técnica y económica de los impactos ambientales de la contaminación del río* , la *caracterización de las principales alternativas de saneamiento*, la *evaluación técnica, ambiental, económica y financiera de estas alternativas*, la *recomendación de una estrategia para la recuperación del río, que constituya la mejor combinación posible de condiciones y criterios técnico ambientales*,

*económicos, financieros e institucionales.* Ese marco de alternativas, indica el asesor técnico de la Procuraduría, se redujo a dos grandes grupos: El tratamiento de las aguas en una planta única aguas debajo de la ciudad (cuenca bajo), combinando con la intercepción de las aguas negras en plantas múltiples ubicadas al final de las principales cuencas o ejes de drenaje urbano. Dentro de esas, prosigue el señor técnico, tres fueron las alternativas que llamaron la atención: a) La construcción de un gran interceptor a lo largo del río Bogotá que recogería las aguas negras hasta llevarlas a la Planta Única de Tratamiento Secundario localizada en Canoas, al sur de Soacha, la cual tendría una eficiencia del 85-90% en la remoción de la carga orgánica. Su costo a 1992 se estimó en unos 1.490 millones de dólares; b) Con el mismo tratamiento de eficiencia, una Planta localizada en Tocaima con un costo de 1.159 millones de dólares y la construcción de dos grandes interceptores uno en Torca y el Embalse del Muña en la Sabana y, otro entre la central de La Guaca y la planta de tratamiento; c) La de tres Plantas con nivel de tratamiento secundario en la desembocadura de los ejes de drenaje urbano, la primera en Salitre (que trataría las aguas negras de las cuencas Salitre, Torca y la Conjera), la segunda en Fucha (que trataría las aguas negras del Fucha, Jaboque y Tintal) y, la tercera en el Tunjuelo (que trataría las aguas negras de las cuencas de Tunjuelo y Soacha), las cuales estarían complementadas con los colectores que de todas formas harían parte de las dos alternativas anteriores y con un costo estimado a 1992 de 1.437 millones de dólares.

6.22.3. Después de realizar un recuento en el tiempo sobre la evolución de las alternativas, el asesor técnico pone de presente que en el folio 170 del estudio de la EPAM, se refiere a la localización y capacidad de las tres plantas así: “la planta del Salitre estaría localizada en la esquina suroriental de la confluencia de los ríos Bogotá y salitre, al norte dela Autopista Medellín, y tendría una capacidad media de tratamiento de 8.4 m<sup>3</sup>/s(subrayado fuera de texto), la del Fucha se ubicaría en la esquina suroriental de la confluencia con el río Bogotá,

aproximadamente donde se tiene prevista la construcción de la Laguna de la Magdalena y su capacidad sería del orden de  $11.4 \text{ m}^3/\text{s}$ . La del Tunjuelo se ubicaría frente a la confluencia con el Bogotá, sobre la margen occidental de éste último, y su capacidad sería de  $3,8 \text{ m}^3/\text{s}$  (cifras de la propuesta original de HE-BVI)". Continúa diciendo el señor asesor que la plantas de tratamiento producirían efluentes con concentraciones de DBO% y SS de aproximadamente  $30 \text{ mg/l}$ , lo que significaría una remoción global del 85-90%. (fls. 4659, c. 8 del c. p.). Más adelante indica que en el folio 26 del estudio de la EPAM se menciona la estrategia de saneamiento de la construcción escalonada de las tres plantas en la desembocadura de los ríos Salitre, Fucha y Tunjuelo, haciendo mención que "la primera trataría un efluente de  $6.73 \text{ m}^3/\text{s}$  con una DBO% de 275, 36  $\text{mg/l}$ . que incluiría procesos primarios y secundarios que garantizaran la remoción de la carga orgánica del 90%."

6.22.4. Señala, que fue así que la Administración Distrital abrió a licitación Pública 001/94 "*Concesión para los sistemas de tratamiento que contrarresten la contaminación hídrica del río Bogotá*", cuya etapa precontractual se culminó el 20 de septiembre de 1994 con la firma del Contrato 015 de 1994, adjudicado al consorcio francés LYOONISE DES EAUX-DEGREMONT que en 1997 se fusionó con la firma francesa LYONNAISE DES EAUX y la firma FRANCO BELGA COMAGNIE DE SUEZ, conformado con la compañía SUEZ LYONNAISE DES EAUX. Luego de referirse al trámite de la Licencia Ambiental, la que fue otorgada, después de que se dio viabilidad técnica y ambiental al proyecto por parte del Ministerio del Medio Ambiente mediante la Resolución 817 de 24 de julio de 1996, y de señalar algunos aspectos del contrato y de dar cuenta de su cesión por parte del consorcio a BAS DE COLOMBIA, de describir el proyecto de tratamiento que en la fase I era de una capacidad de  $4 \text{ m}^3/\text{s}$ , **en sus conclusiones el señor ingeniero pone de presente que en los estudios de la EPAM se menciona como caudal a tratar el de  $6.73 \text{ m}^3/\text{s}$ , en tanto que el diseño y construcción**

**dentro del contrato 015 se realizó para una planta de capacidad de 4 m<sup>3</sup>/s, la cual ya se encontraba subdimensionada, lo cual, indica “es responsabilidad del Concesionario”.**

6.22.5. Enseguida, sobre dicha responsabilidad anota: *“Si el concesionario estaba obligado a obtener el financiamiento del proyecto, no se entiende la razón por la cual el contratista ha tomado una póliza de garantía única frente al Distrito C. Así mismo, frente a los inversionistas, los socios de BAS han establecido una Prenda de Acciones y se ha obtenido una garantía parcial del Banco Interamericano de Desarrollo sobre parte de la emisión de bonos por BAS en el mercado de inversionistas de Estados Unidos. Como si el contratista no hubiera logrado el cierre financiero y con ello no se hubiera cumplido con esta parte del contrato”.*

6.22.6. Puestas de presentes las anteriores conclusiones por quien ha prestado su asesoría a la PROCURADURÍA GENERAL DE LA NACIÓN como su servidor público, condición en la cual intervino en forma diligente como también el PROCURADOR TERCERO JUDICIAL, Dr. LUIS ALBERTO GARCÍA CORTÉS, al que prestó su asesoramiento técnico durante todas las mesas de trabajo, como también intervino en la de la Solución Técnica Integral y, finalmente en las audiencias de discusión y aprobación por todas las partes sobre las diferentes propuestas de Pactos de Cumplimiento, la Sala estima que la CONTRALORÍA GENERAL DE LA REPÚBLICA como la FISCALÍA GENERAL DE LA NACIÓN deberán investigar la responsabilidad fiscal, como la de tipo penal que tanto al concesionario como al interventor del contrato y a los funcionarios del distrito que lo suscribieron, como a las autoridades que dieron la licencia, no obstante la existencia de unos estudios serios, lo que ha ocasionado un detrimento

patrimonial que mes tras mes y año tras año ha venido sufriendo la CAR como el DISTRITO CAPITAL pues con cargo a sus recursos se ha pagado la inversión como la operación y mantenimiento de la PTAR SALITRE (razón esta por la que se estima que tales acciones no han prescrito debido a la continuidad en la ejecución del contrato y el pago de las mesadas por la operación), la cual desde que se diseñó y se construyó ya era insuficiente para tratar el efluente de las aguas contaminadas del RÍO BOGOTÁ por lo que se ordenará compulsar la copia de esta sentencia como del documento que obra entre los folios 4.653 a 4683 del cuaderno 8 anexo al cuaderno 1 principal, como también del contrato 015 y demás documentos pertinentes, para lo cual se requiere al DISTRITO CAPITAL Y A LA EMPRESA DE ACUEDUCTO Y ALCANTARILLADO DE BOGOTÁ para que dentro del término de ejecutoria de esta sentencia aporte con destino a este proceso copia el aludido estudio de la EPAM que no obra en el expediente.

6.22.7. De esa manera, serán los jueces del contrato como también los acabados de señalar, quienes a su cargo tienen decidir el grado de responsabilidad que al concesionario le pueda caber a ese respecto, pero en lo que al cumplimiento del contrato 015, se advierte que el tratamiento que del efluente hizo se ajustó a lo estipulado en él que fue de  $4\text{m}^3/\text{s}$ , por lo que bajo esa razón se negarán las pretensiones en lo que a dicho demandado concierne.

6.23. DE LA CONDENA AL PAGO DE INCENTIVOS. Dada la ingente labor que los actores desplegaron en el curso del proceso para hacer posible que los diferentes intervinientes y demandados contribuyeran con sus acciones y recursos a la SOLUCIÓN INTEGRAL DEL RÍO BOGOTÁ en la que están comprendidos los mismos problemas de sus AFLUENTES, dejando claro que en el caso del señor

GUSTAVO MOYA ÁNGEL será su cónyuge superviviente a quien se reconocerá el pago del incentivo y para el abogado que lo representó en lo que concierne a sus honorarios, éstos se ajustarán al porcentaje del incentivo reconocido y según la tarifa de honorarios de abogado.

6.23.1. Por consiguiente, a favor de cada uno de los accionantes se reconocerá un INCENTIVO EN CUANTÍA DE CINCUENTA SALARIOS MÍNIMOS que correrán en un 50% a cargo del DISTRITO CAPITAL- EMPRESA DE ACUEDUCTO Y ALCANTARILLADO DE LA EMPRESA DE ENERGIA DE BOGOTÁ, en UN VEINTICINCO POR CIENTO que se dividirá entre todos los municipios que fueron objeto de las demandas de cada una de las acciones acumuladas, y el restante 25% a cargo de la CORPORACIÓN AUTÓNOMA REGIONAL DE CUNDINAMARCA y del , MINISTERIO DE AMBIENTE, VIVIENDA Y DESARROLLO TERRITORIAL, MINISTERIO DE MINAS Y ENERGÍA.

6.24. DE LA CONSTITUCIÓN DEL COMITÉ PARA LA VERIFICACIÓN DEL CUMPLIMIENTO DE LAS OBLIGACIONES CONTRAÍDAS EN LOS DIFERENTES PACTOS DE CUMPLIMIENTO COMO DE LAS DEMÁS QUE SE IMPONEN EN ESTA SENTENCIA.

Para los efectos, se conformará un comité integrado por la señora MÓNICA SAENZ Bióloga, con Maestría en Administración de Empresas y Doctorado en Medio Ambiente de la universidad de Orleáns, Francia, la que para los efectos de su título ha enfocado su tesis hacia el problema de la solución de la descontaminación del río Bogotá y sobre los procesos de producción más limpia y quien por su propia iniciativa ha

asumido la problemática de las curtiembres de Villapinzón, como también ha procurado la colaboración de la UNESCO para la solución de la descontaminación del río, instancia con la que la Magistrado Sustanciadora en compañía de los técnicos del DAMA, de la CAR y de la EAAB tuvo una conferencia televisiva poniendo de presente los problemas de la contaminación en orden a que con sus conocimientos en la materia proporcionaran mejores elementos de juicio para esta sentencia sobre los temas discutidos en el proceso, la que mostró su voluntad y envió uno de sus técnicos que puso de presente su interés en prestar la ayuda de tales expertos (ver fl. 50053 a 5054, c.9 y escrito que sobre el tema la doctora Saenz radicó ante la CAR en el mes de junio anterior y que hizo llegar al proceso estando el expediente al despacho). Igualmente, formará parte del comité ASOMUÑA, la FUNDACIÓN AL VERDE VIVO, la FUNDACIÓN AMIGOS DEL PLANETA, la O. N. G. - GIRARDOTEMOS y LA FUNDACIÓN AMBIENTAL ALTO MAGDALENA, la FUNDACIÓN HUMEDAL LA CONEJERA, la CORPORACIÓN SIE, la CORPORACIÓN MOVIMIENTO POR LA VIDA y la CORPORACIÓN MADRE TIERRA., los **PROCURADORES JUDICIALES AMBIENTALES Y AGRARIOS CON JURISDICCIÓN EN LOS MUNICIPIOS DE LA CUENCA DEL RÍO BOGOTÁ** Con la intervención del doctor CARLOS ALBERTO ECHEVERRY ARCINIEGAS, Asesor de la Procuraduría Delegada para Asuntos Ambientales y Agrarios y la Defensoría del Pueblo.

6.24.1. Igualmente, se acoge la sugerencia de la Procuraduría General de la Nación en cuanto a que el Comité designado por el tribunal debe planear, coordinar y verificar el cumplimiento de la sentencia, para lo cual se deben estructurar los subcomités y reglamentar su operatividad bajo la directriz de la Magistrada Sustanciadora, el cual debe rendir un informe trimestral al tribunal, o en el momento en que las circunstancias

lo hagan necesario con el fin de tomar los correctivos, en caso de incumplimiento de lo pactado o de las órdenes impuestas en este fallo.

6.24.2. Los subcomités serán: De vigilancia a la Nación-Ministerio del Ambiente, Vivienda y Desarrollo Territorial-Ministerio de Minas y Energía como a los demás ministerios que deben coordinar sus políticas con el primero y asegurar su ejecución, de vigilancia a la CAR, de vigilancia al Departamento de Cundinamarca, de vigilancia al Distrito Capital, de vigilancia a los municipios de la cuenca del río Bogotá y de vigilancia a las industrias.

6.24.3. En cada subcomité deben participar: Demandante de acuerdo a su demanda, autoridad ambiental competente, Procuraduría General de la Nación a través de la Procuraduría Delegada para Asuntos Ambientales y Agrarios, Defensoría del Pueblo y una ONG o persona experta en el tema ambiental.

6.24.4. En el subcomité de vigilancia de los municipios deben participar los Procuradores Judiciales Ambientales y Agrarios que tiene jurisdicción en el respectivo municipio y un delegado del Gobernador del Departamento de Cundinamarca.

2.24.6. En la vigilancia de la CAR y el DAMA debe participar un Delegado del Presidente de la República como Suprema autoridad administrativa de la política nacional ambiental, un delegado del Alcalde Mayor del Distrito Capital de Bogotá y el Ministerio de Ambiente, Vivienda y Desarrollo Territorial.

6.24.7. Igualmente, una vez se constituya el referido comité y los subcomités, se examinará sobre la necesidad de designar un AUDITOR que coordine, vigile y asegure el cumplimiento de las decisiones tomadas en esta sentencia como se prevé en el inciso final del artículo 27 de la Ley 472, que reúna las más altas condiciones y experiencia en todos los temas de ingeniería civil, como de ingeniería ambiental, administración y planeación para garantizar que los recursos afectos para el cumplimiento de todas y cada una de las obligaciones que las partes contraen no se distraigan.

**6.25. De la Convocatoria para audiencia para la integración del Comité de Vigilancia y los Subcomités y de las audiencias para la evaluación del control de resultados.** Dada la responsabilidad del juez en la salvaguarda de los derechos ambientales una vez quede notificada la demanda, y como parte de las medidas cautelares que aseguren la salvaguarda de los derechos colectivos en consideración a la urgencia para remediar la CATÁSTROFE ECOLÓGICA, se convocará a las partes a una audiencia para integrar el comité y los subcomités de vigilancia, la que tendrá como fin el exponer cuáles obligaciones de las ya pactadas se han cumplido (resaltándose que algunas ya debieron ejecutarse en consideración a las obras que con cargo a sus presupuestos se han proyectado) y cuál es el estado de los planes y programas que se han prometido ejecutar, pues como se indicó lo que ha sido materia de propuestas de pacto por ser la voluntad de las partes, como aquellas que por ley como autoridades ambientales les corresponde ejercer y cumplir según los términos de la Ley 99 de 1993, no pueden ser materia de apelación en cuanto sólo sobre las condenas que no fueron materia de los pactos, o sobre la modificación a éstos, existirá el interés jurídico para obrar, como presupuesto del recurso de alzada que requiere de la causación de un agravio al recurrente, cual así se dejó definido cuando se aprobaron los

pactos por las partes. Poniendo de presente la Sala que la tramitación del recurso de alzada no puede retrasar el cumplimiento de las propuestas objeto de los pactos de cumplimiento como de las obligaciones que por ley, se insiste, les corresponde desde ya desarrollar, incumplimiento que los hará incurso en desacato, se repite, en lo que no es objeto del recurso de apelación. Así mismo, para evaluar los resultados de las gestiones, acciones y obras que a cada una de las entidades corresponde desarrollar en dicha audiencia se señalará la fecha y términos para llevar a cabo las demás audiencia.

6.25.1. Para tal efecto, en tanto se surten los respectivos recursos de apelación que se interpongan ante el superior, se actuará con copia de los pactos y de las respectivas audiencias en las que se discutieron, como también de esta sentencia en la que se resumen todas las actuaciones del proceso,.

6.26. DECLARACIONES Y CONDENAS A PROFERIR. La responsabilidad que sobre la violación a los derechos colectivos se declarará tiene que ver con el comportamiento activo u omisivo de todos los que han contribuido a la causación del daño ecológico, dejando claro que aun cuando el municipio de SIBATÉ está siendo afectado por la degradación del medio ambiente a consecuencia del represamiento de las aguas del RÍO BOGOTÁ en el EMBALSE DEL MUÑA, también es responsable de su degradación no sólo por acción al no tratar sus aguas residuales que vierte a los RÍOS AGUAS CLARAS Y MUÑA COMO AL RÍO BOGOTÁ, sino también por cuanto en su afán de solicitar la construcción de una PLANTA DE TRATAMIENTO A LA ALTURA DEL EMBALSE DEL MUÑA (la que se insiste, en pocos años será insuficiente si toda la región de la cuenca no ingresa y persiste en los PML), nunca se ha preocupado por exigir de las autoridades ambientales como judiciales

mediante el ejercicio de la correspondiente Acción Popular, la descontaminación del RÍO BOGOTÁ que es la causa inmediata de la contaminación del EMBALSE DEL MUÑA y a que la población misma contribuye con sus prácticas no limpias y con la falta de tratamiento de sus aguas residuales.

6.26.1. Por su parte, la responsabilidad que a la EMPRESA DE ENERGÍA DE BOGOTÁ le puede caber, tiene su origen en la falta de una política ambiental en cuanto si bien ella resulta siendo afectada (si tiene en cuenta que cuando inició sus actividades, empezó trasvasando aguas en condiciones más o menos sépticas), no es menos cierto que nunca se preocupó por instaurar la correspondiente acción para la protección del RÍO BOGOTÁ, inclusive fue negligente respecto de la que dio origen a este proceso, dejando que el paso de los años lo continuara degradando no sólo en perjuicio de su patrimonio (por lo que aquí cabe la responsabilidad de quienes veinte años atrás a la fecha en que el tribunal avocó el conocimiento del proceso la dirigieron, como de los Alcaldes del Distrito Capital y Directores del Dama que nada hicieron para detener el daño ecológico), sino de toda una población que vive al margen de la cuenca.

6.26.2. En cuanto a la EMPRESA GENERADORA DE ENERGÍA ELÉCTRICA “EMGESA”, la Sala observa que cuando asumió la generación de la energía eléctrica, las aguas del EMBALSE DEL MUÑA ya se encontraban anóxicas, por lo que ninguna responsabilidad tiene en la causación del estado de degradación de la fuente hídrica. Por el contrario, como sustituta de la actividad que venía ejercitando la EEEB, hoy -EEB-, ha tenido que asumir la ejecución de las obras que se iniciaron con el PLAN DE VIDA MUÑA 2000, dispuesto por la CAR, a raíz de la instauración de la acción de tutela por el señor LUIS CARLOS RODRÍGUEZ NEISA, como de todas las demás acciones y obras objeto

de la acción de tutela que se adelantó contra la EEB y las que son materia de su propuesta de Pacto de Cumplimiento conjunto.

6.26.3. En todo caso, aun cuando EMGESA no es responsable ni por acción ni por omisión de la contaminación del RÍO BOGOTÁ Y DEL EMBALSE (Como se indica en la Resolución 1339 de 13 de noviembre de 2002, expedida por la CAR en la que exonera a EMGESA de ser agente contaminante), en consideración a que cuando se realizó la cesión de acciones de la EEB a ella, se advierte que si tuvo conocimiento -por ser un hecho notorio- sobre el estado de su degradación, razón por la cual debe asumir los costos que la operación y el mantenimiento de las obras del Plan de Vida Muña 2000 requieren, como también de las que son objeto de su propuesta, en cuanto actualmente se encuentra ejercitando una actividad de la que se lucra (de la que si bien el embalsamiento disminuye el impacto ambiental del río aguas abajo, por sobre todo en el RÍO MAGDALENA a donde llegarían todos los lodos y metales causantes de la eutroficación de las aguas), pero que igualmente, es allí donde se vienen sedimentando los lodos, fuera de que el sólo represamiento de las aguas altamente contaminadas es la causa inmediata de los vectores (por sobre todo de los zancudos) y de los fuertes olores que azotan el bienestar y la salud de la comunidad de SIBATÉ y de la región aledaña. Es por esa razón, que debe asumir con cargo a las utilidades de sus acciones o del valor de estas mismas en la sociedad, los costos de la operación del embalse hasta el año 2007, en tanto que la EEB lo hará hasta el 2009 como párrafo a atrás se ordena. En adelante, como se indicó, una vez que todas las acciones y órdenes como condenas impuestas se hayan cumplido, por cuanto para el año 2009 debe verse el resultado altamente positivo que todas las obras conjuntas deben producir en el río, por sobre todo sobre la vida de los peces en atención al alto efecto positivo de las metas de cumplimiento de los PML y mediante el control de los vertimientos de las grasas, carbohidratos, fosfatos y nitratos y demás metales a sus aguas, que, por consiguiente, disminuirán

los costos de tratamiento, razón por la cual a partir de ese año se harán con cargo a las transferencias del sector eléctrico (inversión que ha brillado por su ausencia), por parte de la CAR como de los municipios que las perciben, las que deben invertirse en la cuenca hidrográfica y del área de influencia del río y del embalse, como en forma imperativa lo manda el artículo 45 de la Ley 99 de 1993.

**6.26.4. De la Ejecución de los Planes Maestros de Acueducto Y Alcantarillado por los Municipios de la Cuenca Baja y de los PML por Parte de Estos.** Finalmente, con relación a los municipios de la Cuenca Baja que no fueron convocados al proceso en razón a que son éstos quienes en verdad sufren los impactos de la contaminación del río, y que se encuentran dentro del límite de la jurisdicción del Departamento de Cundinamarca, la Sala requerirá a este ente para que coordine con los mismos las obras a realizar a corto, mediano y largo plazo con la implementación de los diseños y la construcción de sus Planes Maestros de Alcantarillado y de las medidas adoptadas en este fallo. Igualmente, corresponderá a la CAR como máxima autoridad ambiental dentro de su jurisdicción, promover y dirigir todo lo relacionado con los procesos de producción más limpia en la forma y en los términos como en esta sentencia se ha indicado y dispuesto, para que en el año 2009 todas las tres cuencas estén cumpliendo con los objetivos propuestos, en especial con los trazados por la CIUDAD REGIÓN.

**6.26.5.** En relación con las familias que se encuentran lavando arenas en el RÍO TUNJUELO con necesidades básicas insatisfechas (con las que también tuvo oportunidad de dialogar la Magistrada Sustanciadora en orden a concientizarlos de suspender sus labores que producen una alta sedimentación en el río, por ende, la salida de su cauce, quienes pusieron de manifiesto sus condiciones de indigencia que los ha llevado a esas prácticas ilegales, solicitando la ayuda de las

autoridades), la CAR y el DAMA dentro del territorio de su jurisdicción, respectivamente, con la participación del MINISTERIO DE MINAS Y ENERGÍA dentro de lo de su competencia, deberán hacer posible su reubicación en los demás complejos mineros, e igualmente, el DISTRITO CAPITAL como el DEPARTAMENTO DE CUNDINAMARCA y LA BENEFICENCIA DE CUNDINAMARCA deberán dar prioridad a los programas sociales y educativos de esta comunidad ;

6.26.6. En orden a propiciar y controlar los procesos de producción más limpia de las curtiembres, los MUNICIPIOS DE VILLAPINZÓN y de CHOCONTÁ con cargo a sus recursos y/o con la coordinación y cofinanciación del DEPARTAMENTO DE CUNDINAMARCA, de la BENEFICENCIA DE CUNDINAMARCA, de la CORPORACIÓN AUTÓNOMA DE CUNDINAMARCA, quien tendrá bajo su responsabilidad la dirección y el cumplimiento de esta orden, la que también con cargo a su presupuesto gestionará los programas de producción más limpia dando prioridad a esta problemática, y con los buenos oficios de los MINISTERIOS DE AMBIENTE VIVIENDA Y DESARROLLO TERRITORIAL Y DE COMERCIO EXTERIOR, dentro del término máximo de un año (1) contado a partir de la notificación de la presente sentencia, deberán cofinanciar todas las obras de infraestructura que requieran dichos procesos de producción más limpia bajo -si es del caso- el sistema de COOPERACIÓN DEL GREMIO DE LAS CURTIEMBRES (en orden a dar seguridad al otorgamiento de los respectivos créditos), según las directrices trazadas en la parte motiva de esta sentencia, procurando para aquellos que se encuentran con necesidades básicas insatisfechas en atención a la precariedad de sus patrimonios y que se ubican dentro de la ZONA DE RONDA DEL RÍO BOGOTÁ, subsidiarles los planes de vivienda en un término que no podrá sobrepasar de un año contado a partir de la notificación de este

fallo. Por su parte, aquellos (quienes participaron en las Mesas de Trabajo y adquirieron dichos compromisos con el tribunal bajo las órdenes y directrices de la Magistrada Sustanciadora quien visitó en dos oportunidades dicha zona en orden a generar su motivación en los PML) deberán acatar las órdenes de la autoridad ambiental en lo tocante a los programas de producción más limpia, so pena de su exclusión de la cooperativa y el desalojo inmediato. De otro lado, quienes no se encuentren dentro de este último grupo, esto es los que de acuerdo con su declaración de renta estén en capacidad de costear sus propias viviendas deberán ser desalojados de la zona de ronda en el término máximo de seis (6) meses contados a partir de la notificación de esta sentencia; pero deberán ser incluidos dentro de los Programas de Producción Más limpia de que trata este aparte. En ningún caso habrá lugar a la compra o indemnización de predios que se encuentren dentro de la zona de ronda por tratarse de bienes de propiedad de la Nación y de uso público que ilegalmente fueron invadidos a sabiendas por los que en ellos se encuentran viviendo y adelantando sus procesos de producción de curtición. Bajo las mismas directrices y en cumplimiento de las misma orden, el DISTRITO CAPITAL DE BOGOTÁ–DAMA, dentro del término máximo de un (1) año, deberá proceder en coordinación con los ministerios acabados de señalar a implementar, coordinar y poner en funcionamiento el PARQUE DE COEFICIENTE INDUSTRIAL DE LAS CURTIEMBRES DE SAN BENITO o en su lugar, implementar en cada una de las industrias los Procesos de Producción más Limpia. De igual manera, los industriales del Ramo (los que también participaron en las Mesas de Trabajo y se inscribieron en la ventanilla de Acercar o en la respectiva cooperativa “Corporación Ecológica de San Benito”, o aquella a la que se encuentren afiliados según las instrucciones y órdenes que en la respectiva mesa de trabajo les impartió la Magistrado Sustanciadora) deberán proceder en el sentido anotado, so pena del cierre de sus industrias. El tribunal por conducto del respectivo Comité de Vigilancia seguirá cada paso o trámite para el cumplimiento de las órdenes que se imparten, con el correspondiente control de resultados mesa mes, para lo cual las respectivas autoridades

Municipios, Departamento, CAR, DAMA y los respectivos ministerios deberán exhibir la correspondiente documentación so pena de la apertura del incidente de desacato.

De igual manera, Los municipios de las Cuencas Alta y Media, en especial la Empresa de Acueducto y Alcantarillado de Bogotá, de conformidad con los POT velarán por la recuperación y por la protección de las Zonas de Ronda de las quebradas y afluentes de que dan cuenta las pretensiones y del RÍO BOGOTÁ en los términos dispuestos en la parte motiva de este fallo.

Con las anteriores razones, se declarará la responsabilidad de cada uno de los implicados a título de acción u omisión, se aprobarán los Pactos De Cumplimiento en la forma y términos respectivamente discutidos y aprobados por las partes dentro de las audiencias en que fueron presentados, con las observaciones y modificaciones de que da cuenta esta sentencia y, en orden a la ejecución de todas las obras que requiere la SOLUCIÓN TÉCNICA INTEGRAL DE LA DESCONTAMINACIÓN DEL RÍO BOGOTÁ y se dispondrán las condenas correspondientes según los recursos que para el saneamiento ambiental disponen y en atención al grado de responsabilidad que a cada uno de los entes les asiste, a quienes desde ya la RAMA JUDICIAL hace un llamado a la reflexión para que dejen de lado su indolencia y su desatención en la solución del problema y pasen a integrar el grupo de los verdaderos ADALIDES DE LA PAZ Y DEL MEDIO AMBIENTE PARA QUE DIOS, LA PATRIA Y EL MUNDO ENTERO OS LO PREMIEN Y SI NO QUE EL Y ELLOS OS LO DEMANDEN.

En razón y mérito de lo expuesto, el **TRIBUNAL ADMINISTRATIVO DE CUNDINAMARCA, SECCIÓN CUARTA, SUBSECCIÓN “B”**

administrando justicia en nombre de la República de Colombia y por  
autoridad de la Ley,

## **R E S U E L V E:**

**PRIMERO:** DESESTÍMANSE LAS EXCEPCIONES DE  
MÉRITO PROPUESTAS POR LOS  
DEMANDADOS Y DECLÁRANSE  
SOLIDARIAMENTE RESPONSABLES de la  
CATÁSTROFE ECOLÓGICA DEL RÍO BOGOTA y  
DE LA CONTAMINACIÓN DE LOS RÍOS Y  
QUEBRADAS AFLUENTES DEL PRIMERO Y DE  
QUE DAN CUENTA LAS PRETENSIONES, **POR**  
**ACCIÓN** A TODOS LOS HABITANTES E  
INDUSTRIAS DE LA CUENCA QUE DESDE  
HACE NO MENOS DE VEINTE AÑOS HAN  
VENIDO REALIZANDO SUS VERTIMIENTOS  
DOMÉSTICOS E INDUSTRIALES SIN TRATAR  
como actores difusos, **POR OMISIÓN** EN EL  
CONTROL DE LOS VERTIMIENTOS DE LAS  
AGUAS RESIDUALES a la **NACIÓN-**  
**MINISTERIO DE MINAS Y ENERGÍA-**  
**MINISTERIO DE AMBIENTE VIVIENDA Y**  
**DESARROLLO TERRITORIAL (INSTITUTO**  
**DE HIDROLOGÍA Y METEOROLOGÍA,**  
**“IDEAM”),** al **MINISTERIO DE LA**  
**PROTECCIÓN SOCIAL (INVIMA),** al  
**MINISTERIO DE AGRICULTURA,** a la  
**CORPORACIÓN AUTÓNOMA REGIONAL DE**  
**CUNDINAMARCA, “CAR”,** al **DISTRITO**

**CAPITAL DE BOGOTÁ-DAMA-EMPRESA DE ACUEDUCTO Y ALCANTARILLADO DE BOGOTÁ- EMPRESA DE ENERGÍA ELÉCTRICA,** al **DEPARTAMENTO DE CUNDINAMARCA** y a los **MUNICIPIOS DE LA CUENCA ALTA: VILLAPINZÓN, CHOCONTÁ, SUESCA, SESQUILÉ, GACHANCIPÁ, TOCANCIPÁ, ZIPAQUIRÁ, SOPÓ, CAJICÁ, CHÍA, COTA,** de la **CUENCA MEDIA: FUNZA, MOSQUERA, SOACHA y MADRID,** y de la **CUENCA BAJA:** al municipio de **SIBATÉ,** de acuerdo con las razones expuestas en la parte motiva de esta sentencia.

**SEGUNDO:** Por consiguiente, **AMPÁRANSE** los derechos colectivos a un **AMBIENTE SANO,** a la **SALUBRIDAD PÚBLICA** y a la **EFICIENTE PRESTACIÓN DE LOS SERVICIOS PÚBLICOS DOMICILIARIOS** dentro de los procesos acumulados por Acción Popular incoados por los señores **GUSTAVO MOYA ÁNGEL** (fallecido), **MIGUEL ÁNGEL CHAVES GARCÍA,** **JORGE HUMBERTO GONZÁLEZ VILLANUEVA** Y **NICOLÁS ROA,** y **JORGE ENRIQUE CUERVO RAMÍREZ,** de acuerdo con las razones expuestas en la parte motiva de esta providencia. Por consiguiente, **SALVAGUÁRDANSE** LOS **ALUDIDOS DERECHOS COLECTIVOS** mediante la **APROBACIÓN DE LOS PACTOS DE CUMPLIMIENTO** presentados por los entes

públicos mencionados en el literal anterior en la forma y términos discutidos y aprobados en las respectivas audiencias por las partes del proceso y con las observaciones y modificaciones de que da cuenta la parte motiva de este fallo y con las órdenes y condenas que se consignarán en ordinal posterior.

**TERCERO:** Como consecuencia, para restituir las cosas a su estado anterior, esto es, para lograr la descontaminación del RÍO BOGOTÁ y SUS AFLUENTES de que dan cuenta las pretensiones y del EMBALSE DEL MUÑA, deberán observarse también las siguientes directrices respecto de la ejecución de las obras que en los pactos de cumplimiento se mencionan, en orden de prioridad:

**a)** Control de vertimientos de aguas residuales y ejecución de los Programas de Producción Más Limpia en todos los sectores de la producción tanto de la industria casera como de la pequeña, mediana y gran industria, implementados y dirigidos por la CAR y por el DAMA, siguiendo las políticas trazadas por el MAVDT y con la participación y el control por delegación de los MUNICIPIOS, del DISTRITO CAPITAL y del DEPARTAMENTO DE CUNDINAMARCA; **b)** De conformidad con la función que el artículo 5 de la Ley 99 de 1993 le adscribe al MAVDT, en el término máximo de tres (3) meses contados a partir de la notificación de esta sentencia, éste debe proceder a delimitar geográficamente en forma clara cuáles son las **zonas**

**excluidas de la minería**, esto es, dónde no podrán ejecutarse trabajos y obras de exploración y explotación minera, según la previsión del artículo 34 de la Ley 685 de 2001 o “Código de Minas” y bajo las directrices señaladas por la Corte Constitucional en la sentencia C-339 de 2002. Para tal efecto, la autoridad minera (que es la que se define y señala en el art. 317 de la citada ley, en principio el Ministerio de Minas y Energía) tiene el deber de colaboración, el cual no limita ni condiciona el ejercicio de la competencia de la autoridad ambiental quien es la que debe establecer tales zonas; **c)** Igualmente, en el término máximo de seis (6) meses contados a partir del vencimiento del plazo fijado en el literal b), el MAVDT con la intervención y colaboración del MINISTERIO DE MINAS Y ENERGÍA debe proceder en consecuencia a revocar y suspender los títulos, permisos, concesiones y licencias de las exploraciones mineras en las zonas de exclusión.; **d)** En el término máximo de seis (6) meses contados a partir de la notificación de esta sentencia, el MVADT, LA CAR y el DAMA y los municipios (en los casos en que hayan sido delegados por la respectiva autoridad ambiental -art. 54 y 55 Ley 99/93-) deberán proceder a adelantar los procesos administrativos tendientes a revocar, las licencias ambientales, los permisos, autorizaciones o concesiones para el uso y aprovechamiento de los recursos naturales y del medio ambiente cuando quiera que no se estén acatando las condiciones y exigencias en ellos establecidas o no se estén cumpliendo de acuerdo con los términos definidos en

el acto de su expedición; **e)** Dentro del término de los seis meses (6) siguientes a la notificación de esta sentencia el MAVDT, la CAR y el DAMA y los municipios deberán iniciar todas las diligencias tendientes a exigir de los particulares o entes públicos o privados a los que se les haya otorgado las licencias ambientales, autorizaciones, permisos o concesiones a cielo abierto, o en una zona específica, la restauración o sustitución morfológica y ambiental de todo el suelo intervenido en la explotación, por cuenta de los beneficiarios de dichos títulos, permisos o licencias, y en su caso haciendo efectiva la garantía de la póliza de seguro constituida para tales efectos; quienes deberán proceder a la respectiva restauración dentro del término máximo de los cuatro (4) meses siguientes a la fecha en que sean requeridos so pena de la revocatoria o de la suspensión de los mismos por parte de la autoridad ambiental y con la correspondiente intervención del tribunal una vez se constate el desacato para hacer efectiva esta orden. Para tales efectos, **PREVÉNGASE** a la CAR y al DAMA como a los demás órganos ambientales en cuanto a que no podrán invertir los recursos destinados para saneamiento ambiental en programas de reforestación que son de cargo de los particulares a los cuales precisamente deberán exigir el cumplimiento de esta obligación. En relación con las familias que se encuentran lavando arenas en el RÍO TUNJUELO con necesidades básicas insatisfechas, la CAR y el DAMA dentro del territorio de su jurisdicción, respectivamente, con la participación del

MINISTERIO DE MINAS Y ENERGÍA dentro de lo de su competencia, deberán hacer posible su reubicación en los demás complejos mineros, e igualmente, el DISTRITO CAPITAL como el DEPARTAMENTO DE CUNDINAMARCA y LA BENEFICENCIA DE CUNDINAMARCA deberán dar prioridad a los programas sociales y educativos de esta comunidad en la forma dispuesta en la parte motiva de esta sentencia **f)** EL MINISTERIO DE AGRICULTURA Y DESARROLLO RURAL en coordinación con el MINISTERIO DE LA PROTECCIÓN SOCIAL, deberán promover una política concreta y restrictiva sobre riego de cultivos y brebaje de ganado con aguas del río Bogotá y de sus afluentes y del embalse del Muña, los cuales actualmente no cumplen con las normas de calidad para estos, especialmente sobre el control de la zona de ronda en orden a sancionar a los propietarios de los predios que no cerquen sus linderos para impedir el paso del ganado hacia la fuente hídrica; **g)** El incumplimiento de las anteriores órdenes tanto por los particulares como por las autoridades que deben ejercer el respectivo control, dará lugar a la compulsión de copias para ante la Fiscalía General de la Nación por la incursión o coparticipación en los delitos ecológicos tipificados en el Código Penal, en la forma como se indica en la parte motiva de esta sentencia; **h)** El Alcalde Mayor de Bogotá como máxima autoridad de policía del Distrito Capital (por conducto de los alcaldes locales) y los alcaldes municipales, éstos como máxima autoridad de policía dentro del territorio de

sus jurisdicciones, deberán implementar, controlar y retener los productos agrícolas (en especial las hortalizas, frutas y verduras), el ganado mayor y menor y los productos pecuarios que se estén irrigando o alimentando con las aguas o pastos contaminados del o por el río Bogotá y del embalse del Muña. El desacato a esta orden los hará incurso en las conductas penales contra la salubridad pública al igual que a quienes propicien dichas actividades, para lo cual se compulsarán las respectivas copias para ante la Fiscalía General de la Nación y los Alcaldes Locales del Distrito Capital de Bogotá deberán dar cumplimiento a lo dispuesto en el punto 610.5.; **i)** Creación de una sola red Hidrometereológica y estación de monitoreo de las aguas, en la forma prescrita en el punto 6.5.3. de la parte motiva, direccionadas por el INSTITUTO DE HIDROLOGÍA METEREOLÓGICA Y ESTUDIOS AMBIENTALES y alimentada con las bases de datos de la CORPORACIÓN AUTÓNOMA REGIONAL DE CUNDINAMARCA y del DEPARTAMENTO ADMINISTRATIVO DEL MEDIO AMBIENTE DE BOGOTÁ para toda el área de la CUENCA DEL RÍO BOGOTÁ Y DE SUS AFLUENTES, con la constitución de un Fondo Común Económico y con el aporte de los recursos que para tales efectos dispongan en sus presupuestos, como los demás de todas las entidades involucradas en este proceso, quienes para tal efecto deberán contribuir en una cuota parte, en todo caso para optimizar el cumplimiento de dicha función y economizar los recursos, en la proporción

que señalen las autoridades ambientales (si a así lo disponen) de común acuerdo con estos; a falta de acuerdo el tribunal definirá dicho aspecto; **j)** Control de vertimientos de aguas domésticas por el DISTRITO CAPITAL-DAMA-EMPRESA DE ACUEDUCTO Y ALCANTARILLADO y por los MUNICIPIOS DE LAS CUENCAS ALTA MEDIA Y BAJA DEL RÍO BOGOTÁ, con la dirección y coordinación a éstos por la CAR y por el DEPARTAMENTO DE CUNDINAMARCA especialmente de grasas, carbohidratos, nitratos y fosfatos. Para tales efectos, el INVIMA con la coordinación del MAVDT y como parte de la política del GOBIERNO NACIONAL, en el término de la presente o siguiente legislatura ordinaria, deberá presentar el correspondiente proyecto de ley ante el CONGRESO en orden a prohibir la fabricación y uso de los detergentes que contengan fosfatos y se reglamente e incentive la producción y uso de detergentes biodegradables con el fin de detener el proceso de eutroficación de las aguas que es la causa primordial del impacto ambiental en el río y sus afluentes, por sobre todo a las alturas del EMBALSE DEL MUÑA, consagrándose las exclusiones o exenciones a que haya lugar para la importación o fabricación de las materias primas que se requieran o para los productos mismos, dejándose claro que la sola ejecución de esta medida producirá, de un lado, efectos positivos a corto plazo en la descontaminación del río y, de otro lado, el ahorro de recursos en el tratamiento de las aguas residuales; **k)** Inclusión de

los PRAES en la educación primaria, y media y tecnológica y superior, como cátedra obligatoria. Corresponderá al MINISTERIO DE EDUCACIÓN NACIONAL, además de fijar las políticas respectivas, la coordinación y dirección de los programas con las Secretarías de Educación Distrital, Departamental y Municipal y éstas con los respectivos centros de educación y a éstos con las asociaciones de padres de familia. La CÁMARA DE COMERCIO DE BOGOTÁ, junto con la ventanilla de ACERCAR y el DAMA, como los demás entes privados que quieran vincularse (Cajas de Compensación COMFENALCO), podrán colaborar en la ejecución de este programa con la participación de los industriales y de los diferentes centros comerciales para publicitar e incentivar en la comunidad el propósito común de descontaminar el río y sus afluentes mediante las prácticas limpias, para lo cual en el Canal Institucional de la Televisión Nacional se deberá realizar propaganda alusiva a esos procesos de descontaminación en la fuente, con cargo a los recursos de los entes públicos demandados que deberán incluir este rubro dentro de sus presupuestos;

**I)** Para reforzar el control de los vertimientos y la vigilancia sobre los cerros, montañas y laderas, en general sobre todos los suelos y aguas de la Sabana objetos de esta acción, especialmente en lo referente a la deforestación y el cumplimiento de los programas y obligaciones de reforestación por aquellas personas que no hayan dado cumplimiento a los estudios de Impacto Ambiental, o a los Planes de Manejo, en fin

para el control de los PML, el MINISTERIO DE AMBIENTE VIVIENDA Y DESARROLLO TERRITORIAL deberá coordinar con el MINISTERIO DE DEFENSA y éste deberá apoyarlo mediante la prestación del SERVICIO MILITAR OBLIGATORIO AMBIENTAL, que será administrado por las entidades territoriales en la forma y en los términos preceptuados en el artículo 102 de la Ley 99 de 1993. Con los mismos propósitos y en cumplimiento de esta orden y según las prescripciones del artículo 101 Ibídem, el GOBIERNO NACIONAL deberá proceder a tomar las medidas necesarias para la creación o mayor cobertura del cuerpo de POLICÍA NACIONAL AMBIENTAL dentro de toda el área de la CUENCA DEL RÍO BOGOTÁ Y SUS AFLUENTES, de acuerdo con las razones expuestas en el punto 6.5.10.; **II)** En orden a propiciar y controlar los procesos de producción más limpia de las curtiembres de VILLAPINZÓN y CHOCONTÁ, los MUNICIPIOS DE VILLAPINZÓN y de CHOCONTÁ con cargo a sus recursos y/o con la coordinación y cofinanciación del DEPARTAMENTO DE CUNDINAMARCA, la BENEFICENCIA DE CUNDINAMARCA, de la CORPORACIÓN AUTÓNOMA DE CUNDINAMARCA, quien tendrá bajo su responsabilidad la dirección y el cumplimiento de esta orden, la que también con cargo a su presupuesto gestionará los programas de producción más limpia dando prioridad a esta problemática, y con los buenos oficios de los MINISTERIOS DE AMBIENTE

VIVIENDA Y DESARROLLO TERRITORIAL Y DE COMERCIO EXTERIOR, dentro del término máximo de un año (1) contado a partir de la notificación de la presente sentencia, deberán cofinanciar todas las obras de infraestructura que requieran dichos procesos de producción más limpia bajo -si es del caso- el sistema de COOPERACIÓN DEL GREMIO DE LAS CURTIEMBRES, según las directrices trazadas en la parte motiva de esta sentencia, procurando para aquellos que se encuentran con necesidades básicas insatisfechas en atención a la precariedad de sus patrimonios y que se ubican dentro de la ZONA DE RONDA DEL RÍO BOGOTÁ, subsidiarles los planes de vivienda en un término que no podrá sobrepasar de un año contado a partir de la notificación de este fallo. Por su parte, aquellos, deberán acatar las órdenes de la autoridad ambiental en lo tocante a los programas de producción más limpia, so pena de su exclusión de la cooperativa y el desalojo inmediato. De otro lado, quienes no se encuentren dentro de este último grupo, esto es los que de acuerdo con su declaración de renta estén en capacidad de costear sus propias viviendas deberán ser desalojados de la zona de ronda en el término máximo de seis (6) meses contados a partir de la notificación de esta sentencia; pero deberán ser incluidos dentro de los Programas de Producción Más limpia de que trata este aparte. En ningún caso habrá lugar a la compra o indemnización de predios que se encuentren dentro de la zona de ronda por tratarse de bienes de propiedad de la Nación y de uso público que ilegalmente fueron invadidos a sabiendas por los que en ellos se

encuentran viviendo y adelantando sus procesos de producción de curtiembre y de los cuales se han usufructuado en detrimento del medio ambiente; **m)** Bajo las mismas directrices y en cumplimiento de la misma orden, el DISTRITO CAPITAL DE BOGOTÁ –DAMA, dentro del término máximo de un (1) año, deberá proceder en coordinación con los ministerios acabados de señalar a implementar, coordinar y poner en funcionamiento el PARQUE DE COEFICIENTE INDUSTRIAL DE LAS CURTIEMBRES DE SAN BENITO o en su lugar, implementar en cada una de las industrias los Procesos de Producción más Limpia. De igual manera, los industriales del Ramo deberán proceder en el sentido anotado, so pena del cierre de sus industrias. El tribunal por conducto del respectivo Comité de Vigilancia seguirá cada paso o trámite para el cumplimiento de las órdenes que se imparten en este literal como en el anterior, con el control de resultados mes a mes, para lo cual las respectivas autoridades Municipios, Departamento, CAR, DAMA y los respectivos ministerios deberán exhibir la correspondiente documentación so pena de la apertura del incidente de desacato; **n)** Los municipios de las Cuencas Alta y Media, en especial la Empresa de Acueducto y Alcantarillado de Bogotá, de conformidad con los POT, velarán por la recuperación y por la protección de las Zonas de Ronda de las quebradas y afluentes de que dan cuenta las pretensiones, como las del RÍO BOGOTÁ en los términos dispuestos en la parte motiva de este fallo; **ñ)** De conformidad con lo dispuesto en el punto

6.5.1.9. Los municipios y el Distrito capital deberán expedir dentro del término máximo de seis (6) meses la reglamentación de los usos del suelo; **o)** De acuerdo con lo señalado en el punto 6.5.8. la CONTRALORÍA GENERAL DE LA NACIÓN, como las CONTRALORÍAS DISTRITAL Y DEPARTAMENTAL **DEBERÁN PROCEDER A EJERCER EL CORRESPONDIENTE CONTROL DE LOS RECURSOS CON DESTINO AL SANEAMIENTO AMBIENTAL PREVISTOS EN LA LEY** por parte de los entes públicos involucrados en la presente acción; **p)** En atención a lo dispuesto en el punto 6.5.9.6. los diferentes gremios de la producción que ejercen actividades en la CUENCA DEL RÍO BOGOTÁ Y SUS AFLUENTES deberán ingresar a los procesos de producción más limpia que promuevan la CAR y el DAMA en los respectivos territorios de su jurisdicción; **q) ORDÉNASE** a los MINISTERIOS DE LA PROTECCIÓN SOCIAL, DE MINAS Y ENERGÍA, DE COMERCIO EXTERIOR, DE AGRICULTURA y de EDUCACIÓN, al DEPARTAMENTO NACIONAL DE PLANEACIÓN para que planeen y ejecuten coordinadamente con el MINISTERIO DE AMBIENTE, VIVIENDA Y DESARROLLO TERRITORIAL todos los programas relacionados con las funciones adscritas en el artículo 5º de la Ley 99 de 1993, según los términos consignados en el punto 6.5.2.; **r) ORDÉNASE** a la CAR y al DAMA conformar el grupo de GUARDABOSQUES según lo previsto en el POMCO y de acuerdo con lo expresado en el punto 6.5.10.; **s)**

Los Municipios deberán dar cumplimiento a las sentencias dictadas por este tribunal sobre la *optimización de los mataderos y plantas de faenado* en el término que en ellas se dispuso, como también las de aquellos municipios que no han sido objeto de la interposición de Acciones Populares sobre la materia y que estén contaminando las aguas con los residuos ruminales; **t)** La CAR, el DAMA y la EAAB y los Municipios deberán velar por la adecuada destinación de los recursos para la adquisición de los predios en orden a proteger las fuentes hídricas. La Contraloría General de la Nación, la Contraloría del Distrito Capital y Departamental deberán ejercer el control fiscal en forma oportuna con el fin de que los recursos destinados para el saneamiento ambiental de los ríos y quebradas no se dispersen, atendiendo a que la descontaminación es actividad prioritaria. **u)** Los Alcaldes Locales del Distrito Capital DEBERÁN controlar los vertimientos según las órdenes impartidas en el punto 6.10.15; **v)** El FONDO NACIONAL DE REGALÍAS y el MINISTERIO DE HACIENDA Y CRÉDITO PÚBLICO deberán dar cumplimiento a lo dispuesto en el punto 6.16.3. sobre las transferencias por concepto de regalías a los municipios y al Distrito Capital, debiendo pagar lo que hasta la presente adeudan a estos entes en los términos señalados en la parte motiva. Así también, dicho Ministerio deberá realizar las transferencias de Ley 715 correspondientes al 41% del Propósito General a los municipios de la Cuenca Alta, Media y Baja del RÍO BOGOTÁ, como al Distrito Capital; **x)**

Todos los entes involucrados en la presente acción deberán dar cumplimiento a lo dispuesto en el punto 6.5.4.7. respecto a la autorización por la MESA REGIONAL DE LA CUENCA DEL RÍO BOGOTÁ Distrito Capital-Departamento de Cundinamarca y del Tribunal para adelantar nuevas investigaciones teniendo en cuenta la innovación tecnológica que se presente y que contribuya al saneamiento del RÍO BOGOTÁ y del EMBALSE DEL MUÑA.

**CUARTO:** **DECLÁRASE** que la descontaminación del RÍO BOGOTÁ y sus afluentes de que dan cuenta las pretensiones y del EMBALSE DEL MUÑA, también comprende la ejecución de las siguientes obras que fueron materia de análisis y aprobación en los respectivos pactos de cumplimiento como por la MESA DE SOLUCIÓN TÉCNICA INTEGRAL PARA LA DESCONTAMINACIÓN DEL RÍO BOGOTÁ que para el efecto se llevó a cabo con la intervención de todos los técnicos expertos que representaron a cada uno de los entes públicos demandados, como se da cuenta en la parte motiva: **a)** Diseño, construcción y ejecución de los PLANES MAESTROS DE ACUEDUCTO Y ALCANTARILLADO en todos los municipios de las Cuencas Alta, Media y Baja, en la forma y dentro de los términos señalados en los respectivos pactos de cumplimiento de los municipios y del Distrito Capital de Bogotá, para lo cual se aprueban las diferentes propuestas de los pactos de cumplimiento, en todo

caso la construcción de las redes de alcantarillado y de los interceptores no podrá sobrepasar del año 2009, por lo cual, las que se hubieren proyectado con posterioridad a ese año, deberán ajustarse a lo aquí dispuesto. Con relación a los municipios de la Cuenca Baja, que no concurrieron al proceso, el DEPARTAMENTO DE CUNDINAMARCA en atención a las funciones que se le asignan en el artículo 64 de la Ley 99 de 1993, deberá promover, coordinar y cofinanciar, con el apoyo de la Nación-Ministerio del Medio Ambiente si es del caso (a falta de la suficiencia de los recursos de los entes municipales de esta cuenca), los diseños y la ejecución de sus respectivos planes maestros de acueducto y alcantarillado en un plazo que no podrá, igualmente, exceder del año 2009. **b)** Los municipios como el Distrito Capital deberán proceder a la separación de las redes pluviales de las de alcantarillado desde el mismo momento de su diseño y así ejecutarán sus planes maestros. Para aquellos donde se han construido en forma mixta deberán proceder a separarlas, una vez se haya cumplido con las metas de cobertura de acueducto y alcantarillado; **c)** Dentro del término máximo de tres (3) años, contados a partir de la fecha de presentación en audiencia de su pacto de cumplimiento, la CORPORACIÓN AUTÓNOMA REGIONAL DE CUNDINAMARCA deberá realizar las obras y mejoras que requieren las Plantas de Tratamiento de su propiedad que tiene instaladas en los municipios de que da cuenta la parte motiva de este fallo para colocarlas en capacidad de tratar en

óptimas condiciones el efluente residual que cada una de esas localidades esté vertiendo a las mismas y, los municipios deberán comenzar a operarlas con cargo a sus tarifas y recursos inmediatamente la CAR dé cumplimiento a lo aquí dispuesto, de acuerdo con lo aprobado respecto de este punto en las audiencias de discusión de los respectivos pactos, presentados por ésta como por aquellos. En todo caso, en orden a garantizar la operación y mantenimiento de las PTAR, la CAR, podrá contratar un solo operador regional, con el cobro de las tarifas respectivas a los municipios y, estos, a su vez, podrán incluir este pago con cargo a las tarifas de acueducto y alcantarillado de los usuarios de acuerdo con lo prescrito en el artículo 16 de la Resolución CRA 287 de 2004; **ch)** El IDEAM deberá realizar la caracterización física, química y biológica a la entrada y salida de las plantas de tratamiento de aguas residuales de propiedad de la CAR, luego de ser puestas en óptimas condiciones para entregar a los municipios; **d)** Los municipios deberán construir las plantas de tratamiento que se requieran para dar total cobertura al tratamiento de sus aguas residuales en un término que no podrá sobrepasar del año 2009. En todo caso, el Municipio de Villapinzón deberá proceder en el término máximo de los tres (3) años siguientes a la fecha de la notificación de la presente sentencia a construir su planta de tratamiento de aguas residuales, según los términos previstos en el punto 6.9.7. **e)** Como parte de las alternativas de solución técnica ofrecidas o propuestas por parte del DISTRITO CAPITAL-

DAMA-EMPRESA DE ACUEDUCTO Y ALCANTARILLADO DE BOGOTÁ (además del diseño y ejecución de todo su Plan Maestro de Acueducto y Alcantarillado en el Distrito Capital de Bogotá que se consideran son parte integrante de la medida de que trata el literal a) de este aparte de la resolutive), **APRÚEBASE** la AMPLIACIÓN DE LA PLANTA DE TRATAMIENTO DEL SALITRE para tratar un efluente no inferior a una capacidad de 8 m<sup>3</sup>/s, la construcción de los INTERCEPTORES SALITRE-TUNJUELO, FUCHA-TUNJUELO, la ESTACIÓN ELEVADORA TUNJUELO, el INTERCEPTOR TUNJUELO-CANOAS, la ESTACIÓN ELEVADORA CANOAS, la PLANTA DE TRATAMIENTO CANOAS BAJO EL TRATAMIENTO PRIMARIO QUÍMICAMENTE ASISTIDO y con la capacidad para tratar el efluente que determine el MINISTERIO DE AMBIENTE, VIVIENDA Y DESARROLLO TERRITORIAL al conceder la respectiva licencia ambiental y, la construcción del INTERCEPTOR CANOAS ALICACHÍN. El distrito Capital-EAAB a largo plazo deberá proceder hacia el tratamiento terciario de las aguas tal y como se prescribe en la parte motiva de este fallo; **f) APRÚEBASE** EL PACTO DE CUMPLIMIENTO PRESENTADO POR LA EMPRESA DE ENERGÍA DE BOGOTÁ Y POR LA EMPRESA GENERADORA DE ENERGÍA “EMGESA” en los términos señalados en su propuesta de pacto y aprobados por las partes, con la siguiente modificación respecto a la operación de las obras del embalse: EMGESA y la EEB deberán asumir la

operación y mantenimiento de las obras a que se refiere el numeral 6.10.4.3. (Dragado y disposición de lodos, Operación y mantenimiento de sistemas de aireación, Cosecha y disposición de buchón), de la siguiente manera: la primera hasta el año 2007 y la segunda hasta el año 2009. En adelante la CAR, el MUNICIPIO DE SIBATÉ y por los demás MUNICIPIOS que reciben transferencias de EMGESA o del sector eléctrico, destinarán un porcentaje atendiendo al monto de los recursos que cada uno percibe, descontado el que les corresponde aportar para la operación y mantenimiento de la PTAR CANOAS en la forma como se dispone en la parte motiva de esta sentencia y hasta tanto la EAAB asuma el costo por este concepto.

**g) APRÚEBASE** el Pacto de Cumplimiento presentado por la CAR con la aclaración como se indicó en la respectiva audiencia, que el cumplimiento de la obligación de que trata el Parágrafo 2º del artículo 44 de la Ley 99 de 1993, esto es del 50% del producto correspondiente al recaudo del porcentaje o sobretasa del impuesto predial y otros gravámenes a la propiedad inmueble, deberá destinarse en los términos dispuestos en esta sentencia; **h) EL DRAGADO** del RÍO BOGOTÁ Y DE SUS AFLUENTES correrá con cargo a los recursos de la EAAB, de la CAR del MAVDT y del MINISTERIO DE MINAS Y ENERGÍA en la forma señalada en el punto 6.18. de la parte motiva de este fallo.

**QUINTO:** Así mismo, las obras de que trata el literal e) del ordinal anterior, se construirán en el siguiente término y con cargo a las siguientes entidades y recursos: **a)** Para los efectos de la construcción del interceptor TUNJUELO - CANOAS para el cual la EAAB no lo tiene proyectado dentro de las tarifas, el DISTRITO CAPITAL deberá realizar una transferencia de recursos superior al 30% del 41% del Propósito General, de tal forma que alcance a cubrir su terminación; **b)** La misma transferencia deberá continuar haciendo una vez se haya construido dicho interceptor dentro del plazo convenido en la propuesta de pacto y aprobado por el tribunal, en un porcentaje que no podrá ser inferior al 50% del 41% del Propósito General, con destino a la construcción de la Planta de Tratamiento de Canoas y para su posterior operación y mantenimiento, hasta tanto la EAAB pueda asumir su costo con cargo a las tarifas; Para tales efectos se conminará a la NACIÓN - MINISTERIO DE HACIENDA Y CRÉDITO PÚBLICO para que cumpla en forma oportuna Y SIN DILACIONES con la obligación de transferir al Distrito los recursos de la Ley 715 del Propósito General; **c)** Siendo insuficientes los anteriores recursos para la construcción de la PLANTA ELEVADORA DE CANOAS, LA PLANTA DE TRATAMIENTO DE CANOAS y el interceptor CANOAS ALICACHÍN, su costo debe ser cubierto no solo con las transferencias de ley 715 por parte del Distrito acabada de señalar, sino con las transferencias que la CAR debe hacer al DISTRITO CAPITAL por

el 50% del Predial, previa deducción de los costos de ampliación de la PTAR SALITRE, y en lo que reste, serán los recursos por tasa retributiva incluida en las tarifas de la empresa prestataria del servicio proyectados al año 2009, los que deben quedar afectos para su construcción para lo cual deberá constituirse un FONDO CUENTA con todos los recursos que en forma oportuna deberán trasladar las entidades involucradas. En ese orden, teniendo en cuenta la magnitud de las obras que la EAAB está emprendiendo y debe ejecutar en un lapso que no puede sobrepasar al año 2009, se requiere para la aprobación de los correspondientes créditos, que la NACIÓN preste su aval a la empresa en orden a obtenerlos, que como se previó para el Contrato 015 pueden acudir a la pignoración de tales rentas proyectadas en los años según el precio de las mismas, que permita la pronta consecución de los recursos con los que deben ejecutarse las obras. El pago de los réditos de la deuda se hará con cargo a los recursos de la Nación teniendo en cuenta que todas las entidades demandadas han cohonestado con su actuar omisivo a la agravación del daño ecológico como ampliamente ha quedado analizado en esta sentencia, por lo que todas deben contribuir con sus recursos a la restauración de las fuentes de agua afectadas tal y como lo prevé el artículo 34 de la Ley 472 de 1998;

**d)** De igual manera, para efectos de la operación y el mantenimiento de la PTAR CANOAS se hará con cargo a los recursos por *Ley 715 del Distrito Capital* que perciba después del año 2009, y con las

*transferencias del sector eléctrico a la CAR y a los municipios*, especialmente Sibaté que recibe un porcentaje mayor que los demás, de la siguiente manera: El Distrito Capital aportará el 50% del 41% del Propósito General, la suma que reste del precio de la operación descontado dicho porcentaje será cubierta por partes iguales por la CAR, el MUNICIPIO DE SIBATÉ y por los municipios que reciben las transferencias, considerados estos últimos como una sola parte para efectos de dividir en tres partes el saldo; **e)** Una vez pagada la deuda por concepto de la construcción de la PTAR CANOAS, la EAAB asumirá su operación y mantenimiento con cargo a las tarifas como lo prevé el artículo 16 de la Resolución CRA 287 de 2004 y con el apoyo de los recursos acabados de señalar.

**SEXTO:** Igualmente, **APRUÉBANSE LOS PACTOS DE CUMPLIMIENTO** presentados por las INDUSTRIAS ETERNIT COLOMBIANA S.A., LÍQUIDO CARBÓNICO COLOMBIANA S.A., S.A., ALPINA, GRUPO SIDERÚRGICO DIACO, STANTON & CIA S.A., ESPUMADOS S.A., PAPELES Y CORRUGADOS ANDINA S.A., EMPRESA COLOMBIANA DE CABLES EMCOCABLES S.A., con la ejecución de las obras y en los términos en ellos propuestas. Respecto de CRISTALERÍA PELDAR, REFISAL y MALTERÍAS DE COLOMBIA S.A **DECLARÁSE** que si bien no

existen unas propuestas concretas son empresas que deberán continuar con sus procesos de producción hacia la certificación de la Norma ISO 14001. Con la misma observación y en atención al tratamiento de sus aguas residuales **DECLÁRASE** que la COMPAÑÍA NACIONAL DE VIDRIOS S.A., no vierte sus aguas residuales hacia el río Bogotá sin tratar. En cuanto a las sociedades PROTEÍNAS Y ENERGÉTICOS DE COLOMBIA S.A., DISTRIBUIDORA TROPIABASTOS LTDA. Y UNIABASTOS EN LIQUIDACIÓN **TIÉNESE** como probada la actuación que sobre sus procesos de producción reposa en la CAR, la que deberá continuar con el control ambiental a estas industrias bajo las metas señaladas. **RECHÁZASE** la nulidad interpuesta por el MAVDT.

**SÉPTIMO:** **DECLÁRASE** como no probada la excepción de **COSA JUZGADA** que interponen la CAR, EMGESA y la EMPRESA DE ACUEDUCTO Y ALCANTARILLADO DE BOGOTÁ y **NIÉGANSE LA DENUNCIA DEL PLEITO Y LOS LLAMAMIENTOS EN GARANTÍA** que incoan la EMPRESA DE ENERGÍA DE BOGOTÁ y la EMPRESA GENERADORA DE ENERGÍA “EMGESA” respectivamente. Respecto de la OBJECCIÓN POR ERROR GRAVE al dictamen pericial presentado por los auxiliares FABIO ROBERTO PÉREZ y JOSÉ MANUEL GONZÁLEZ,

como respecto al señalamiento de sus honorarios **ESTÉSE** a lo dispuesto en el punto 6.17, según las motivaciones de este fallo.

**OCTAVO:** EL PRESIDENTE DE LA REPÚBLICA Y EL CONGRESO DE LA REPÚBLICA, dentro de los límites de su competencia, **DEBERÁN REVISAR y READECUAR** las funciones que desarrollan el MAVDT y LA CAR como autoridades ambientales con el fin de asegurar la ejecución de las políticas y programas ambientales, según las consideraciones señaladas en los puntos 6.1.3.3., 6.1.3.4. y 6.1.3.5. Así mismo, EL PRESIDENTE DE LA REPÚBLICA, como suprema autoridad administrativa de la política ambiental que ocupa el primer lugar dentro del SINA **DEBERÁ VELAR** por el cumplimiento de esta sentencia, para lo cual, dentro de los límites de su competencia podrá acudir hasta el mecanismo de la declaratoria del Estado Emergencia Ecológica, según las razones expuestas en la parte motiva de este fallo.

**NOVENO:** **ABSUÉLVANSE** de las pretensiones a la COMISIÓN REGULADORA DE AGUA POTABLE, al INSTITUTO GEOGRÁFICO AGUSTÍN CODAZZI, a la SUPERINTENDENCIA DE SERVICIOS PÚBLICOS DOMICILIARIOS, de acuerdo con las motivaciones; así mismo a la SOCIEDAD BOGOTANA DE AGUAS SUEZ LYONNAISE DES EAUX DEGREMONT E.S.P.

S.A, respecto de la cual el cumplimiento del contrato 015 corresponderá al Juez Contencioso Administrativo a cuya competencia está adscrita el examen de legalidad, como también la tiene para el contrato de concesión que para el efecto se celebró y se compulsarán copias de las piezas procesales pertinentes con destino a la Contraloría General de la República y a la Fiscalía General de la Nación para que investiguen el detrimento que al fisco se ha causado, como las conductas ilícitas en que se haya podido incurrir, según las razones expuestas en el punto 6.22. de este fallo.

**DÉCIMO:**        **CONSTITÚYESE EL COMITÉ** para la verificación del cumplimiento de esta sentencia con las personas y fundaciones que se relacionan en la parte motiva de esta providencia.

**DÉCIMO PRIMERO:**    **FÍJESE** como incentivo para cada uno de los mencionados actores la suma de CINCUENTA SALARIOS MÍNIMOS LEGALES MENSUALES, cuyo pago corre en el porcentaje y a cargo de las entidades de que da cuenta la parte motiva de esta sentencia. **NIÉGANSE** las demás indemnizaciones de acuerdo con lo señalado en la parte motiva de este fallo.

**DÉCIMO SEGUNDO**    **ORDÉNASE** la publicación de la parte resolutive de esta sentencia en un diario de amplia

circulación nacional a cargo del DISTRITO CAPITAL DE BOGOTÁ, quien podrá repetir contra los demás demandados por los costos de la misma.

**DÉCIMO TERCERO:** Para los fines previstos en el artículo 80 de la Ley 472 de 1998, **REMÍTASE** al Defensor del Pueblo copia de la presente decisión. **ÁBRASE** cuaderno separado de copias de esta sentencia para efectos de llevar a cabo la audiencia para la conformación del comité de vigilancia y control para el cumplimiento de los pactos. En auto separado se señalará fecha para la misma.

**CÓPIESE, NOTIFÍQUESE Y CÚMPLASE.**

Discutido y aprobado en sesión de la fecha, Acta No.

**NELLY YOLANDA VILLAMIZAR DE PEÑARANDA**  
Magistrado Ponente

**FABIO O. CASTIBLANCO**  
Magistrado

**BEATRIZ MARTÍNEZ QUINTERO**  
Magistrada  
(Con Salvamento parcial de voto)

D.M.A.
