# Supplementary material
Source: publisher figshare collection journal article supplement (https://tandf.figshare.com/articles/dataset/_/10732607)
Supplement: Supplementary file 1 [file 2 › fjds_a_1690134_sm1270.pdf]

# PROCURADURÍA GENERAL DE LA NACIÓN

Procuraduría Delegada para la Prevención en Materia  
de Derechos Humanos y Asuntos Étnicos

## EL DERECHO A LA SALUD

en perspectiva de DERECHOS HUMANOS  
y el Sistema de Inspección,  
Vigilancia y Control del Estado Colombiano  
en Materia de Quejas en Salud

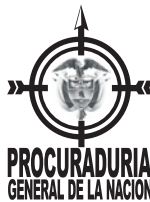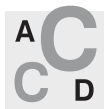

Agència Catalana  
de Cooperació  
al Desenvolupament

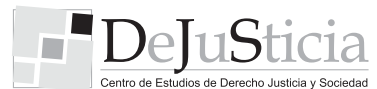



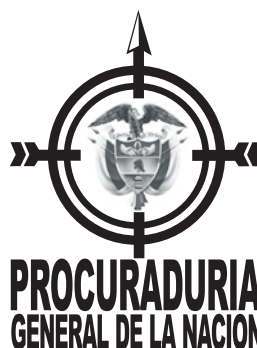

EDGARDO JOSÉ MAYA VILLAZÓN  
Procurador General de la Nación

CARLOS ARTURO GÓMEZ PAVAJEAU  
Viceprocurador General de la Nación

PATRICIA LINARES PRIETO  
Procuradora Delegada para la Prevención  
en Materia de Derechos Humanos y Asuntos Étnicos

RODRIGO UPRIMNY  
Director del Centro de Estudios de Derecho, Justicia y Sociedad  
-DeJuSticia-

Prohibida la reproducción total o parcial de la obra, a través de fotocopiado, scanner o cualquier otro sistema mecánico o electrónico, sin permiso expreso y escrito del titular de los derechos de autor.

© **PROCURADURÍA GENERAL DE LA NACIÓN**

ISBN 978-958-8295-74-9

Primera edición: mayo 2008  
Bogotá D.C., Colombia

Documento elaborado bajo la coordinación de la Dra. Patricia Linares Prieto, Delegada para la Prevención en Materia de Derechos Humanos y Asuntos Étnicos, con el apoyo del equipo de consultores: Dr. Rodrigo Uprimny, Dra. María Carrizosa de López, Dr. Jorge Sandoval; y el grupo de investigadores: Diana Guarnizo Peralta, Adriana Patricia Fuentes López, Patricia Herrera Kit y Mauricio Adolfo Ricaurte. Publicación realizada en el marco del Acuerdo de Cooperación entre la Procuraduría General de la Nación, la Agencia Catalana de Cooperación al Desarrollo de la Generalitat de Catalunya- ACCD - y el Centro de Estudios de Derecho, Justicia y Sociedad - DeJuSticia-.

**IMPREMPASTE**  
Impresión

**Jefferson Valencia V.**  
Diseño Portada y Diagramación

**Hernando Clavijo**  
Corrección de estilo

# CONTENIDO

---

|              |    |
|--------------|----|
| PRESENTACIÓN | 9  |
| PRÓLOGO      | 13 |
| INTRODUCCIÓN | 1  |

## PRIMERA PARTE

|                                                                       |   |
|-----------------------------------------------------------------------|---|
| El sistema colombiano de salud a la luz del derecho humano a la salud | 2 |
|-----------------------------------------------------------------------|---|

## CAPÍTULO 1

|                                                                                                             |    |
|-------------------------------------------------------------------------------------------------------------|----|
| El marco normativo: el derecho a la salud como derecho humano                                               | 27 |
| 1.1. Los debates acerca de la naturaleza jurídica del derecho a la salud                                    | 28 |
| 1.2. Marco normativo internacional                                                                          | 31 |
| 1.2.1. Sistema de las Naciones Unidas                                                                       | 32 |
| 1.2.2. Sistema Interamericano de Derechos Humanos                                                           | 36 |
| 1.3. Los contenidos del derecho a la salud y las obligaciones de los Estados y de las autoridades           | 37 |
| 1.4. Normatividad nacional: breves consideraciones sobre la recepción constitucional del derecho a la salud | 42 |
| 1.. La imperatividad del derecho a la salud y la flexibilidad en la configuración del sistema de salud      | 44 |

## CAPÍTULO 2

|                                                                                                                                                                                |    |
|--------------------------------------------------------------------------------------------------------------------------------------------------------------------------------|----|
| La política pública: el sistema de salud adoptado por la Ley 100 de 1993 y sus resultados en el goce del derecho a la salud                                                    | 47 |
| 2.1. El contexto ideológico de la reforma en salud                                                                                                                             | 48 |
| 2.2. El diseño institucional y los principios orientadores de la reforma                                                                                                       | 1  |
| 2.3. Estudio de la compatibilidad <i>prima facie</i> del sistema de salud con la Constitución y con los estándares de derechos humanos                                         |    |
| 2.3.1. Una compatibilidad <i>prima facie</i>                                                                                                                                   | 6  |
| 2.3.2. La precariedad de la prevención y la salud pública en la Ley 100                                                                                                        | 7  |
| 2.3.3. Las barreras de acceso a la atención a los servicios de salud                                                                                                           | 8  |
| 2.3.4. La uniformidad en las cotizaciones y el principio de igualdad                                                                                                           | 9  |
| 2.3.. Los principios de igualdad y de no discriminación: cotizaciones uniformes y la diferenciación de beneficios y financiación entre los regímenes contributivo y subsidiado | 61 |
| 2.4. Una breve mirada a los resultados del sistema en términos de la realización del derecho a la salud                                                                        | 64 |
| 2.4.1. La falta de un sistema de información de la política de salud en perspectiva de derechos humanos                                                                        | 6  |
| 2.4.2. Un indicador de disponibilidad: el incremento del gasto público y las discusiones sobre su eficacia y la destinación de los recursos                                    | 67 |
| 2.4.3. Un indicador de accesibilidad: los avances y límites en materia de cobertura                                                                                            | 72 |
| 2.4.4. Otros indicadores de accesibilidad: las barreras de acceso a la salud                                                                                                   | 7  |
| 2.4.. Los problemas de calidad y aceptabilidad en el derecho a la salud. Las percepciones de los usuarios sobre la calidad de los servicios                                    | 76 |

|                                                                                                                                         |    |
|-----------------------------------------------------------------------------------------------------------------------------------------|----|
| 2.4.6. Los indicadores de resultado o de goce del derecho a la salud.<br>Avances e inequidades en el estado de salud de los colombianos | 77 |
| 2.. El control, ¿la respuesta a los problemas o un problema más?                                                                        | 79 |

## SEGUNDA PARTE

|                                                                               |    |
|-------------------------------------------------------------------------------|----|
| El sistema de inspección, vigilancia y control y el derecho humano a la salud | 81 |
|-------------------------------------------------------------------------------|----|

### CAPÍTULO 3

|                                                                  |     |
|------------------------------------------------------------------|-----|
| El modelo del SGSSS a la luz de la teoría de sistemas            | 83  |
| 3.1. Los sistemas mecánicos                                      | 84  |
| 3.2. El patrón de organización del SGSSS                         | 88  |
| 3.3. La estructura global del SGSSS                              | 90  |
| 3.4. Funciones de las partes del SGSSS                           | 92  |
| 3.4.1. Dirección y regulación                                    | 92  |
| 3.4.2. Funciones generales de Inspección, Vigilancia y Control   | 9   |
| 3.4.3. Financiación y administración                             | 103 |
| 3.4.4. La prestación de los servicios y los usuarios del sistema | 104 |

### CAPÍTULO 4

|                                                                      |     |
|----------------------------------------------------------------------|-----|
| El SGSSS en la práctica: un análisis desde la teoría de sistemas     | 107 |
| 4.1. El funcionamiento real de un sistema ideal de atención en salud | 107 |
| 4.1.1. Problemática y contexto                                       | 110 |
| 4.1.1.1. Los problemas persisten                                     | 110 |
| 4.1.1.2. Un sistema de control de calidad deficiente                 | 114 |
| 4.1.1.3. ¿Un modelo con enfoque diferencial?                         | 11  |
| 4.1.1.4. Un modelo economicista ideal                                | 117 |
| 4.1.1.. Una estructura segmentada                                    | 123 |
| 4.1.2. Patrón de organización del sistema                            | 124 |
| 4.1.2.1. Dirección, regulación y control                             | 124 |
| 4.1.3. Financiación y administración del SGSSS                       | 126 |
| 4.1.4. Prestación de los servicios en el SGSSS                       | 127 |
| 4.1.. Los afiliados y usuarios del SGSSS                             | 129 |
| 4.2. El subsistema de Inspección, Vigilancia y Control               | 130 |
| 4.2.1. Funcionamiento del sistema IVC para el trámite de quejas      | 132 |
| 4.2.1.1. Superintendencia Nacional de Salud                          | 134 |
| 4.2.1.2. Secretarías de Salud                                        | 137 |
| 4.2.2. Funcionamiento de los agentes externos de control             | 140 |
| 4.2.2.1. La Procuraduría General de la Nación                        | 140 |
| 4.2.2.2. Defensoría del Pueblo                                       | 143 |
| 4.2.2.3. Personerías                                                 | 14  |

### CAPÍTULO 5

|                                                                   |     |
|-------------------------------------------------------------------|-----|
| Acción de tutela: ¿una alternativa de acceso al goce del derecho? | 147 |
|-------------------------------------------------------------------|-----|

|                                                                                                                                                                    |     |
|--------------------------------------------------------------------------------------------------------------------------------------------------------------------|-----|
| 1. La acción de tutela y la garantía del derecho a la salud                                                                                                        | 148 |
| .1.1. Acciones de tutela para exigir medicamentos o tratamientos que son negados a pesar de estar en el POS y de no estar en tiempos de carencias                  | 1 2 |
| .1.2. Acciones de tutela para exigir medicamentos o tratamientos excluidos del POS.                                                                                | 1 7 |
| .1.3. Acciones de tutela que simultáneamente exigen medicamentos o procedimientos que se encuentran dentro del POS y eventos NO POS.                               | 16  |
| .1.4. Primeras conclusiones                                                                                                                                        | 16  |
| 2. El debate sobre la acción de tutela en la protección del acceso al derecho a la salud                                                                           | 166 |
| . 2.1. Las ventajas y desventajas de la tutela frente al sistema de quejas                                                                                         | 167 |
| .2.2. Los problemas y limitaciones propios de la tutela como mecanismo para garantizar el derecho                                                                  | 169 |
| .2.2.1. Las inequidades de la tutela: ¿la mayor garantía del derecho pero para los incluidos?                                                                      | 169 |
| .2.2.2. Las barreras de uso de la tutela y sus límites para la satisfacción del derecho                                                                            | 17  |
| .2.2.3. Los impactos negativos de la tutela sobre la igualdad y la sostenibilidad financiera del sistema de salud                                                  | 176 |
| .2.3. Algunas conclusiones                                                                                                                                         | 177 |
| 3. ¿Reformas a la tutela o reformas en el sistema de salud?                                                                                                        | 180 |
| .3.1. Las reformas encaminadas a limitar o impedir el empleo de la acción de tutela para la garantía del derecho a la salud                                        | 180 |
| .3.2. El fortalecimiento de la tutela individual para derechos sociales, la tutela estructural y la creación de una jurisdicción especializada de seguridad social | 181 |
| . 3.3. Las reformas legislativas a la normatividad propia del sistema                                                                                              | 183 |

## CONCLUSIONES Y RECOMENDACIONES

|                    |     |
|--------------------|-----|
| 1. Conclusiones    | 189 |
| 2. Recomendaciones | 196 |

## BIBLIOGRAFÍA

|                                                                                                                                         |     |
|-----------------------------------------------------------------------------------------------------------------------------------------|-----|
| 1. LIBROS Y ARTÍCULOS                                                                                                                   | 199 |
| 2. TEXTOS Y SITIOS ELECTRÓNICOS                                                                                                         | 204 |
| 3. ARTÍCULOS DE REVISTAS                                                                                                                | 20  |
| 4. NORMATIVIDAD NACIONAL                                                                                                                | 206 |
| 5. NORMATIVIDAD INTERNACIONAL<br>(Declaraciones, Tratados, Convenios, Opiniones, Observaciones e Informes de organismos especializados) | 209 |
| 6. JURISPRUDENCIA                                                                                                                       | 211 |

## ANEXO

|                                              |     |
|----------------------------------------------|-----|
| 1. Fuentes secundarias                       | 21  |
| 2. Fuentes primarias. Encuestas, entrevistas | 217 |



## PRESENTACIÓN

La adopción por Colombia de la fórmula del Estado social de derecho en la Constitución de 1991 implica un compromiso claro de las autoridades por hacer efectivos los derechos de las personas. Y no sólo los derechos civiles y políticos sino también los derechos económicos, sociales y culturales, pues una efectiva protección de la dignidad de la persona, que es la base de nuestro ordenamiento constitucional, requiere que éstas gocen de unas condiciones materiales básicas que les permitan un ejercicio real de sus capacidades y libertades.

Esto explica que la Constitución haya incorporado un catálogo amplio de derechos sociales y haya conferido una especial fuerza jurídica a los tratados de derechos humanos ratificados por Colombia, entre los cuales se encuentran aquellos relativos a los derechos sociales, como el Pacto Internacional de Derechos Económicos, Sociales y Culturales. Entre esos derechos se encuentra aquel de todas las personas a gozar del máximo nivel de salud física y mental, reconocido por el artículo 12 del mencionado Pacto y por los artículos 44, 48 y 49 de la Constitución. Este derecho tiene contenidos que han sido especificados por la doctrina y la jurisprudencia, tanto nacional como internacional, y que implica obligaciones para las autoridades de respetar, proteger y realizar dicho derecho.

En desarrollo de estos mandatos constitucionales, el Congreso adoptó hace aproximadamente quince años un nuevo esquema de salud, por medio de la Ley 100 de 1993, la cual implicó profundas reformas al sistema de salud colombiano. Sin embargo, este nuevo sistema de salud ha tenido en la práctica enormes dificultades para el logro de dichos objetivos y sus resultados son, por decir lo menos, mixtos. Así, en estos quince años ha habido un aumento considerable del gasto público en salud. Ese aumento de los recursos y las reformas institucionales generaron, según ciertos indicadores y estudios, mejoras importantes en términos de aseguramiento y atención a la enfermedad de los sectores pobres de la sociedad, que fueron significativas especialmente en los primeros años de implementación de la Ley 100 de 1993. Sin embargo, dichos avances han tendido a estancarse, por lo cual subsisten problemas muy serios de inequidad, universalidad y calidad del servicio de salud. Por ejemplo, es claro que aún no se ha logrado la universalidad, pues hay un amplio número de personas que no logran acceso al sistema, ya sea porque no están aseguradas, ya sea porque cuando requieren atención médica, no logran el correspondiente servicio. Además persisten los problemas de inequidad, como

lo demuestran, entre otros aspectos, la subsistencia de la diferencia en los contenidos del Plan Obligatorio de Salud (POS) para el régimen contributivo y el Plan Obligatorio de Salud para el Régimen Subsidiado (POS-S). Habría pues una segmentación en el acceso a los servicios de salud, pues quienes no tienen capacidad de pago tendrían planes de beneficios menores que aquellos que gozan de capacidad de pago, lo cual parece contrario al principio de no discriminación que debe gobernar las políticas sociales.

Pero eso no es todo; son recurrentes los casos de personas que mueren en la puerta de los hospitales porque las entidades prestadoras se niegan a recibirlas; los casos de quienes son sometidos, por parte de las instituciones aseguradoras, a innumerables trámites para acceder a los medicamentos o tratamientos; y en general hay cientos de situaciones que se presentan a diario, en que las autoridades públicas y las entidades que deberían garantizar la atención vulneran con sus actuaciones y omisiones el derecho a la salud de los colombianos. Por último, y tal vez más grave aún, en ciertos aspectos, como los relativos a la salud pública y en especial a las estrategias de vacunación y prevención de ciertas enfermedades, ha habido incluso deterioros importantes. Diversos indicadores muestran que en materia de vacunación ha habido un retroceso en términos de cobertura y de equidad, lo cual ha provocado un aumento de la incidencia de enfermedades como el dengue o la fiebre amarilla.

A pesar de sus logros, el sistema de salud no ha logrado satisfacer entonces el derecho de los habitantes del territorio colombiano al goce pleno del derecho al máximo nivel de salud física y mental, lo cual ha provocado quejas crecientes de los usuarios, tanto en las instancias de control internas al sistema de salud, como las secretarías de salud o la Superintendencia Nacional de Salud, como frente a entidades externas, asociadas al Ministerio Público, como las personerías, la Defensoría del Pueblo o la propia Procuraduría General de la Nación. Pero a pesar de que en ocasiones esas quejas son útiles para la solución de algunos casos individuales, el sistema de inspección, vigilancia y control asociado al sistema de salud no ha sido tampoco suficiente para asegurar plenamente el derecho a la salud de los colombianos, que entonces han recurrido crecientemente a la tutela para lograr acceso a los servicios médicos requeridos. En los últimos años se han presentado unas 80.000 tutelas por año por violaciones al derecho a la salud. No obstante, la tutela, si bien puede ser útil para la solución de casos individuales, no ha logrado tampoco una solución apropiada a los problemas generales del sistema de salud colombiano.

La Procuraduría General de la Nación (PGN), que tiene dentro de sus funciones la de proteger los derechos humanos y asegurar su efectividad representando los intereses de la sociedad frente al Estado, tomó nota de ese mal estado del goce del derecho a la salud de los colombianos y por ello decidió desarrollar, en asocio con el Centro de Estudios de Derecho, Justicia y Sociedad DeJuSticia y con la financiación de la Agencia Catalana de Cooperación al Desarrollo, una investigación que intentará evaluar el sistema de salud colombiano, y en particular su sistema de inspección, vigilancia y control, desde una perspectiva de derechos humanos.

Las anteriores consideraciones explican la novedad de este estudio, pues en Colombia hay trabajos importantes que han analizado la problemática del sector salud o estudios normativos que han intentado decantar el contenido y el alcance del derecho a la salud, pero,

salvo contadas excepciones, no existen análisis suficientes que hayan intentado evaluar el diseño y la dinámica del sistema de salud desde una perspectiva de derechos humanos. Menos aún, evaluaciones que hayan centrado su estudio en la comprensión de la dinámica del sistema de inspección, vigilancia y quejas y su capacidad o sus limitaciones para contribuir a la satisfacción del derecho a la salud.

El estudio llega a conclusiones y recomendaciones importantes. Por ejemplo propone que la Corte Constitucional declare un estado de cosas inconstitucional en materia de salud, no sólo por los graves problemas, en términos de acceso, inequidad y calidad, que sigue presentando el sistema sino además por las limitaciones que tiene la tutela para enfrentar esos problemas. Igualmente el estudio propone que se desarrolle un debate nacional amplio sobre el sistema de salud, que debe estar orientado por los contenidos del derecho a la salud y por las obligaciones del Estado colombiano frente a ese derecho, a fin de ajustar al máximo nuestro sistema de salud a esos estándares normativos.

Estas conclusiones y recomendaciones son polémicas y suscitarán sin lugar a dudas discusiones académicas y sociales. Pero ése es precisamente nuestro propósito, pues la Procuraduría quiere aportar las conclusiones de este estudio a las autoridades gubernamentales responsables de la materia, a las organizaciones sociales y a las instituciones de salud, públicas y privadas, pues creemos que son necesarios y urgentes replanteamientos de fondo en el diseño de dichas políticas públicas.

Entrego entonces, como Procurador General de la Nación y representante de los intereses de la sociedad, este estudio, que estoy seguro contribuirá a avanzar en ejercicios de reflexión que cualificarán las decisiones en materia de salud.

El trabajo se realizó en la Procuraduría Delegada para la Prevención en Materia de Derechos Humanos y Asuntos Étnicos, a cargo de la doctora Patricia Linares Prieto, en asocio con el Centro de Estudios de Derecho, Justicia y Sociedad DeJuSticia. La investigación contó con la asesoría general de la doctora María Carrizosa, experta de reconocida trayectoria en el tema de los Derechos Humanos, y del profesor Rodrigo Uprimny, experto en Derecho Constitucional y Derechos Humanos y director del Centro de Estudios de Derecho, Justicia y Sociedad DeJuSticia. El estudio igualmente contó con la asesoría de los investigadores Jorge Sandoval y Luis Eduardo Pérez, expertos en el sistema de salud colombiano. Las investigadoras Patricia Herrera Kit, Diana Guarnizo y Adriana Fuentes hicieron aportes decisivos al desarrollo exitoso de este proyecto, mientras que el estudiante Mauricio Adolfo Ricaurte colaboró fructíferamente en la labor de recopilación de información. La investigación contó con el apoyo financiero de la Agencia Catalana de Cooperación al Desarrollo. A todos ellos quiero expresarles mi sincero reconocimiento.

EDGARDO JOSÉ MAYA VILLAZÓN  
Procurador General de la Nación



## PRÓLOGO

En los últimos dos siglos, los avances científicos y técnicos de la humanidad han supuesto una revolución en la medicina y la salud en el mundo, que ha cambiado sustancialmente la calidad y esperanza de vida del ser humano.

Paralelamente, el desarrollo de la democracia y de la naturaleza de los propios Estados ha llevado a reconocer el derecho a la salud como un derecho humano básico, internacionalizado en la Declaración de los Derechos Humanos de las Naciones Unidas de 1948. Un avance importante lo constituye la creación de la Organización Mundial de la Salud el 7 de abril de 1948, fecha que conmemoramos cada año mediante el Día Mundial de la Salud.

A partir de entonces, han proliferado las cumbres y pactos internacionales, el desarrollo teórico y jurídico del derecho humano a la salud, e incluso se ha especificado y especializado ese derecho con enfoque diferencial de género, como ocurre, por ejemplo, con la especificación de los derechos sexuales y reproductivos de las mujeres.

El derecho a la salud ha quedado constituido como un derecho fundamental, como una necesidad básica humana que supone “un estado de completo bienestar físico, mental y social y no solamente la ausencia de dolencia o enfermedad”. El derecho a la salud es un derecho habilitante de otros derechos: en ningún otro derecho como en la salud se observa la interdependencia entre los derechos tan claramente como en éste. Las condiciones de salud de una persona varían según el grado de libertad en que viva, o de la vivienda que habita, del acceso a alimentación adecuada, vestido y trabajo.

El Estado Social de Derecho pretende garantizar los denominados derechos sociales mediante su reconocimiento en la legislación y mediante políticas activas de protección social, de protección a la infancia, a la vejez, frente a la enfermedad y al desempleo, de integración de las clases sociales menos favorecidas. La Conferencia Mundial de Derechos Humanos de Viena, en 1993, concluyó que estos derechos tienen la misma categoría, importancia, origen, titular y destinatario que los demás; pertenecen a todos los miembros de la familia humana (universales) y son reclamables al Estado, obligado a su promoción y protección.

En América Latina, el derecho a la salud se concibe como el “disfrute del más alto nivel de bienestar físico, mental y social” y está expresamente consagrado en el Protocolo Adicional de la Convención Americana sobre Derechos Humanos. Este Protocolo sobre los derechos económicos, sociales y culturales es conocido también como el Protocolo de San Salvador (1988).

Sin embargo, a pesar de los destacables avances técnicos y legales, el derecho a la salud sigue teniendo grandes desigualdades, en materia de calidad y acceso, entre países ricos y países en desarrollo, y especialmente entre clases sociales, grupos étnicos y entre diferentes regiones, siempre en perjuicio de aquellos grupos más deprimidos por la pobreza. La dicotomía entre economía y justicia, dominada actualmente por la primera, hace que la salud sea en la práctica más un servicio accesible según el estatus económico que un verdadero derecho humano básico.

En Cataluña estamos apostando por un sistema sanitario orientado a la ciudadanía y a la comunidad, que garantice una accesibilidad adecuada, con servicios que respondan a las necesidades de los usuarios y que potencien la calidad y la seguridad de la asistencia. La atención primaria y la salud comunitaria han de ser verdaderos ejes vertebradores del sistema, con una atención descentralizada e integrada al territorio, que fomente el trabajo en red de atención primaria y salud comunitaria, que priorice las necesidades de la ciudadanía en el terreno de la salud.

En el ámbito de la cooperación al desarrollo, el Gobierno de la Generalitat de Cataluña eleva, en su Plan Director de la Cooperación Catalana 2007-2010, el derecho a la salud y al agua como primer objetivo estratégico, con el propósito de mejorar la cobertura, la calidad y el uso de los sistemas públicos de salud con vocación de servicio público, especialmente en la atención primaria, favoreciendo el acceso a los sectores de la población con menos oportunidades.

La Agencia Catalana de Cooperación al Desarrollo, como órgano ejecutor de la política de cooperación de la Generalitat de Cataluña, le ha estado apostando en los últimos años a proyectos relacionados con el derecho a la salud, aportando a los logros de los Objetivos del Milenio 4, y 6 y al desarrollo humano sostenible, con la salud como base del mismo. Además, estamos comprometidos con la necesidad de adoptar una visión global de la salud, entendiéndola como un derecho universal de responsabilidad mundial, no sólo para acortar las brechas actuales en cuanto al acceso a este derecho, sino también para responder colectivamente a brotes de enfermedades, epidemias, accidentes industriales, desastres naturales y otras emergencias de salud, que pueden convertirse rápidamente en amenazas para la seguridad sanitaria mundial.

Por todos estos motivos, nos decidimos positivamente a la propuesta de la Procuraduría General de la Nación, como órgano de control que vela por el cumplimiento de las obligaciones del Estado colombiano y por la colaboración que hemos encontrado con el mismo, para apoyar este diagnóstico sobre el sistema de salud colombiano.

Desde la Agencia Catalana de Cooperación al Desarrollo, esperamos que este estudio, realizado por la Procuraduría y DeJuSticia, aporte al debate sobre el derecho de salud con enfoque de derechos humanos, y contribuya a evaluar y mejorar el acceso de los ciudadanos, especialmente de aquellos menos favorecidos, a un derecho a la salud universal, de calidad y equitativo.

Andreu Felip i Ventura  
Director de l'Agència Catalana de Cooperació al Desenvolupament  
Generalitat de Catalunya

## INTRODUCCIÓN

A partir de 1991, el derecho a la salud quedó formalmente consagrado en la Constitución Política de Colombia, y le correspondió al Estado organizar, dirigir y reglamentar la prestación de los servicios de salud a todos los habitantes del territorio nacional. Adicionalmente, Colombia ya había ratificado tratados de derechos humanos, en especial el Pacto Internacional de Derechos Económicos Sociales y Culturales, que en su artículo 14 establece el derecho de todas las personas al disfrute del más alto nivel posible de salud física y mental. La Ley 100 de 1993 desarrolló el nuevo enfoque de la política pública en este campo y creó el Sistema General de Seguridad Social en Salud (SGSSS) inscrito en la lógica de manejo social del riesgo, conforme a un modelo que sus promotores calificaron de “pluralismo estructurado”, fundado en el aseguramiento y en la competencia regulada<sup>1</sup>, y que otorgó a los particulares la potestad de concurrir para la prestación de los servicios de salud, pero sometidos a la vigilancia y control estatal (Art. 49 C.P.).

La puesta en marcha del SGSSS, que pretendió corregir los problemas de los modelos precedentes, universalizar el acceso a la salud y garantizar la satisfacción del derecho para todos los habitantes del territorio nacional, ha tenido en la práctica enormes dificultades para el logro de dichos objetivos y sus resultados son, por decir lo menos, mixtos. Así, en estos quince años ha habido un aumento considerable del gasto en salud, que según los datos del Ministerio de la Protección Social - Programa de Apoyo a la Reforma de Salud (PARS) y del Centro de Investigaciones para el Desarrollo (CID) - Universidad Nacional de Colombia, para el 2003 correspondía al 7,8% del PIB<sup>2</sup>, cifra sin duda importante<sup>3</sup>. Ese aumento de los recursos y las reformas institucionales generaron, según ciertos indicadores y estudios, grandes mejoras en términos de aseguramiento y atención de la enfer-

---

1. Sobre la lógica de este modelo, ver infra capítulo 2. Ver igualmente su defensa por uno de sus promotores. Juan Luis Londoño y Julio Frenk (1997). “Pluralismo estructurado: Hacia un modelo innovador para la reforma de los sistemas de salud en América Latina”, Washington, BID. Documento de Trabajo No. 33.

2. Ver Oscar Rodríguez (dir.) (2007). *¿Ha mejorado el acceso en salud? Evaluación de los procesos del régimen subsidiado*. Bogotá, Ministerio de la Protección Social - Programa de Apoyo a la Reforma de Salud (PARS), Centro de Investigaciones para el Desarrollo (CID) - Universidad Nacional de Colombia.

3. De acuerdo con Barón, en su estudio de cuentas de salud, el gasto en salud en Colombia habría pasado de representar 6,2% del PIB en 1993 a 9,6% en 1997, para estabilizarse en 7,7 % en 2003, que es una cifra que supera el promedio de los países en América Latina y el Caribe, que es de 7%. Citado por Olga Lucía Acosta y otros (2007) “Equidad en el financiamiento del SGSSS” en VV.AA. *Avances y desafíos de la equidad en el sistema de salud colombiano*. Bogotá, DNP, Fundación Corona, Universidad de los Andes y Universidad del Rosario, p. 0.

medad de los sectores pobres de la sociedad, que fueron significativas especialmente en los primeros años de implementación de la Ley 100 de 1993. Sin embargo, dichos avances han tendido a estancarse, en especial a partir de la crisis económica de 1997, por lo cual subsisten problemas muy serios de inequidad, universalidad y calidad del servicio de salud. Por ejemplo, es claro que aún no se ha logrado la universalidad, pues hay un amplio número de personas que no logran acceso al sistema, ya sea porque no están aseguradas, ya sea porque aunque requieren atención médica, no lograron el correspondiente servicio<sup>4</sup>. Además persisten los problemas de inequidad, como lo demuestran, entre otros aspectos, el que persista la diferencia en los contenidos del Plan Obligatorio de Salud (POS) y el Plan Obligatorio de Salud para el Régimen Subsidiado (POS-S), pese a que desde la expedición de la Ley 100 se establecieron plazos para lograr la equiparación de los dos contenidos de prestación. Igualmente, aún son recurrentes los casos de personas que mueren en la puerta de los hospitales porque las entidades prestadoras se niegan a recibirlas, o los casos de quienes son sometidos por parte de las instituciones aseguradoras a innumerables trámites para acceder a los medicamentos o tratamientos; en general hay cientos de situaciones que se presentan a diario, en que las autoridades públicas y las entidades que deberían garantizar la atención vulneran con sus actuaciones y omisiones el derecho a la salud de los colombianos. Por último, y tal vez más grave aún, en ciertos aspectos, como los relativos a la salud pública y en especial a las estrategias de vacunación y prevención de ciertas enfermedades, ha habido incluso deterioros importantes. Diversos indicadores muestran que en materia de vacunación ha habido un retroceso en términos de cobertura y de equidad, lo cual ha provocado un aumento de la incidencia de enfermedades como el dengue o la fiebre amarilla<sup>6</sup>.

El derecho de los colombianos a gozar del más alto nivel de salud física y mental dista entonces de estar satisfecho, a pesar de su claro reconocimiento normativo y del considerable aumento de los recursos destinados para su realización. Esto parecería evidenciar no sólo un incumplimiento de parte del Estado colombiano de sus obligaciones internacionales y constitucionales en este campo<sup>7</sup> sino además la existencia de problemas graves en el diseño, o al menos en la implementación, del sistema de salud adoptado por la Ley 100 de 1993.

Frente a esta situación, diversos estudios de muy buena calidad han dado cuenta de las problemáticas que enfrenta el sistema en su conjunto, ya sea por las dificultades en la ampliación de la cobertura, o las inequidades en la atención o los problemas de finan-

---

4. En 200, el 32 % de la población seguía sin afiliarse; y aproximadamente el 33% de las personas que se sintieron enfermas no lograron la correspondiente atención profesional. Ver Carmen Elisa Flórez y Victoria Eugenia Soto (2007) "Evolución de la equidad en el acceso a los servicios y estado de salud de la población colombiana 1990-200" en VV.AA. *Avances y desafíos de la equidad en el sistema de salud colombiano*. Bogotá, DNP, Fundación Corona, Universidad de los Andes y Universidad del Rosario, p. 1 y 19.

5. El artículo 162 de la Ley 100 de 1993 dispuso que el Plan Obligatorio de Salud del régimen subsidiado alcanzaría el Plan Obligatorio del régimen contributivo en forma progresiva antes del año 2001. El reconocimiento expreso de que la equiparación no se ha logrado está en el artículo 14, lit. e) de la Ley 1122 de 2007, en donde se encomienda a la Comisión de Regulación en Salud la actualización anual del Plan Obligatorio de Salud "buscando el acercamiento progresivo de los contenidos de los planes de los dos regímenes con tendencia hacia el que se encuentra previsto para el régimen contributivo".

6. Al respecto, ver Jazmín Campos, Martha Rivera y Martha Yanira Castañeda (2004) "El malestar de la salud en Colombia" en *Economía Colombiana* No. 303, p. 9 y ss.

7. Como lo dice la Comisión Interamericana, "...además de destinar recursos públicos suficientes para los derechos sociales y económicos, los Estados deben velar por un uso apropiado de esos recursos". Ver CIDH. Tercer informe sobre la situación de derechos humanos en Paraguay, 2000, Cap V.

ciamiento<sup>8</sup>, mientras que otra serie de análisis, también de gran rigor académico, han abordado los problemas de la salud en Colombia, desde la perspectiva del derecho internacional de los derechos humanos y los estándares internacionales y constitucionales de protección, ofreciendo miradas acerca de la manera como el derecho a la salud, en cuanto derecho humano, implica una serie de obligaciones para el Estado que se le imponen y deben ser efectivamente cumplidas<sup>9</sup>. Sin embargo, en general, con contadas excepciones<sup>10</sup>, ha tendido a existir una cierta disociación entre, de un lado, los estudios normativos acerca del contenido y alcance del derecho a la salud y, de otro lado, los análisis empíricos acerca de la evolución del sistema de salud en Colombia. Esto es desafortunado, pues una de las formas esenciales que tienen los Estados para cumplir sus obligaciones en materia de derechos humanos es precisamente a través de las políticas públicas, por lo que conviene desarrollar valoraciones de dichas políticas y de los desarrollos institucionales desde perspectivas de derechos humanos<sup>11</sup>. La ventaja de este enfoque es que no sólo se basa en obligaciones jurídicas que los Estados tienen que cumplir, conforme al derecho internacional de los derechos humanos y en muchos casos conforme a sus propias constituciones, sino que además “dota a las estrategias de desarrollo de un marco conceptual explícito, del cual pueden inferirse elementos valiosos para pensar en los diversos componentes de esa estrategia”<sup>12</sup>. Por ello, como lo dice sugestivamente Paul Hunt, Relator Especial de Naciones Unidas sobre el Derecho a la Salud, en su último informe: “Del mismo modo que el derecho a un juicio con las debidas garantías ha servido para fortalecer los sistemas de justicia, el derecho a la salud también puede utilizarse para reforzar los sistemas de salud”<sup>13</sup>.

La Procuraduría General de la Nación (PGN) es consciente de su responsabilidad en esta materia, como órgano cabeza del Ministerio Público, que tiene dentro de sus funciones la de proteger los derechos humanos y asegurar su efectividad representando los intereses de la sociedad frente al Estado, y es altamente sensible ante esta situación, razón por la cual, en asocio con el Centro de Estudios de Derecho, Justicia y Sociedad DeJuSticia y con la financiación de la Agencia Catalana de Cooperación al Desarrollo, ha propiciado la elaboración de este trabajo, que precisamente pretende combinar las dos perspectivas mencionadas. En efecto, la finalidad de este estudio es analizar el desarrollo del sistema de salud desde una perspectiva de derechos humanos.

8. Un ejemplo importante de ese tipo de estudios es la citada investigación del CID de la Universidad Nacional. Ver Óscar Rodríguez (dir.) (2007). Ob. cit.

9. Un buen ejemplo de este tipo de enfoques es Óscar Parra (2003). *El derecho a la salud en la Constitución, la jurisprudencia y los instrumentos internacionales*, Defensoría del Pueblo, Bogotá.

10. Los estudios dirigidos por Luis Jorge Garay han buscado superar esa disociación, analizando las posibilidades facticas de realización de distintos derechos sociales, como la salud, la educación o la vivienda, con lo cual articula una visión de derechos con un estudio empírico de las políticas desarrolladas para realizar el derecho estudiado. Ver por ejemplo Luis Jorge Garay, Adriana Rodríguez (dirs.) (200). *Colombia, diálogo pendiente*. Bogotá. Planeta Paz.

11. Sobre la conveniencia de esos enfoques, ver Luis Eduardo Pérez, Cesar Rodríguez, Rodrigo Uprimny (2007). *Los derechos sociales en serio. Hacia un diálogo entre derechos y políticas públicas*. Bogotá, DeJuSticia, IDEP. Ver igualmente Victor Abramovich (2007). “Los estándares interamericanos de derechos humanos como marco para la formulación y el control de las políticas sociales” en Victor Abramovich, Alberto Bovino y Christian Courtis. *La aplicación de los tratados de derechos humanos en el ámbito local. La experiencia de una década*. Buenos Aires, CELS, p. 217 y ss.

12. Victor Abramovich. Ob. cit., p. 226.

13. Informe del Relator Especial sobre el derecho de toda persona al disfrute del más alto nivel posible de salud física y mental, Sr. Paul Hunt. Naciones Unidas. Consejo de Derechos Humanos. A/HRC/7/11, 31 de enero de 2008, versión editada, párrafo 123.

El estudio parte entonces de un análisis del SGSSS, desde la concepción de la salud como derecho humano, por lo cual la definición del contenido del derecho dada por las instancias internacionales vinculadas al tema y los desarrollos de la normatividad y jurisprudencia, nacional e internacional, también son el marco de análisis para valorar los avances y retrocesos del sistema de salud en Colombia.

Esta dimensión normativa permite llegar a un consenso generalizado, y es que la salud es un derecho humano, aunque no se desconoce la existencia de desacuerdos en cuanto a los medios para lograr la satisfacción del derecho, suscitados entre quienes defienden la exclusiva intervención estatal en la prestación de los servicios y quienes aceptan la concurrencia de los particulares en ello, fórmula adoptada expresamente en la Constitución de 1991.

Con base en ese marco normativo, procedimos a estudiar más en detalle la evolución del sistema de salud adoptado por la Ley 100 de 1993, con el fin de determinar si éste es o no congruente con el paradigma del Estado que consagró la Carta Política de 1991. Este examen nos llevó a una doble conclusión: de un lado, que a pesar de los importantes avances, los resultados de ese sistema no eran los prometidos por los reformadores de 1993, pues no se había alcanzado la universalidad en el aseguramiento de la población, y las ganancias en acceso y equidad para los sectores pobres no eran suficientes para corregir las profundas desigualdades que subsisten en el acceso a la salud en Colombia, fuera de que han existido retrocesos en otros ámbitos, como en el de la salud pública. Y, de otro lado, pudimos constatar que un elemento esencial para el sistema de salud, y que además es de enorme trascendencia para la propia labor de la Procuraduría General de la Nación, era el Subsistema de Inspección, Vigilancia y Control (SIVC) en relación con el trámite de quejas de los usuarios como elemento determinante en la dinámica de funcionamiento del sistema. En efecto, conforme a la teoría del “pluralismo estructurado” que orientó la reforma de 1993, es claro que el mercado de la salud no es perfecto, pues no sólo la salud es reconocida como un bien meritorio sino que además existen profundas asimetrías de información y de poder entre los usuarios y los prestadores, y existen riesgos de selección adversa y exclusión de ciertos sectores de población. Por ende, los promotores de la reforma de 1993, que eran favorables a la introducción de mecanismos de mercado en la salud, reconocían empero la importancia de que existiera no sólo una regulación adecuada del mercado de la salud sino además un sólido SIVC.

En efecto, los diversos problemas detectados y ampliamente documentados sobre el acceso a la salud y calidad de la prestación no han encontrado soluciones adecuadas y generan el reclamo frecuente de los usuarios a través de los canales previstos para ello, puesto que desde el diseño inicial, el modelo de salud planteó un sistema de prestación mixta, cuya eficiencia y eficacia estarían garantizadas por un dispositivo de control y vigilancia estatal fuerte, que aseguraría el logro de sus cometidos. En ese sentido, si la realización del derecho presenta problemas, es necesario cuestionar también el desempeño de los organismos encargados de la vigilancia y el control, que deberían asegurar que tales irregularidades no ocurrieran. Por lo mismo es pertinente hacerse preguntas como las siguientes: ¿Cómo está funcionando el control y qué implicaciones tiene este control en el comportamiento de los actores del sistema de salud?; ¿qué se controla y qué

efectos tiene ese control en la garantía del derecho a la salud?; y ¿cuáles son los medios con los que cuentan los ciudadanos para reclamar la efectiva garantía del derecho a la salud dentro del modelo vigente?

Esta investigación del SIVC era también importante pues el desempeño de dicho subsistema es un tema relativamente poco explorado en la amplia literatura académica sobre el sistema de salud en nuestro país. En efecto, con excepción del importante trabajo de Restrepo y Cárdenas, elaborado en el marco de la citada investigación del CID<sup>14</sup>, no encontramos otros estudios sistemáticos sobre el SIVC. Por ello decidimos centrar la investigación en el estudio del SIVC y su capacidad para contribuir a la materialización en Colombia del derecho a la salud.

Las anteriores consideraciones explican la particularidad de esta investigación y sus posibles aportes, pues aunque existen numerosos estudios dedicados al tema de la salud, sólo unos pocos se refieren al componente de inspección, vigilancia y control. Además, en la medida en que el presente análisis incorpora la perspectiva de la garantía del derecho, se logran puntos de encuentro entre las perspectivas de derechos humanos y de análisis de políticas públicas, las cuales resultan complementarias, de manera que las dos dimensiones dialogan para obtener un análisis integral del SIVC en materia de quejas en salud.

La investigación se concibe como un estudio de tipo exploratorio cuyo trabajo inicial de recopilación de fuentes primarias y secundarias, tales como informes producidos por las mismas entidades, documentos que reseñan el trabajo realizado por las instituciones del sector o textos de tipo académico, fue acompañado con la aplicación de una encuesta piloto diligenciada por los 32 Procuradores Regionales y 2 Procuradores Provinciales. Esta primera aproximación empírica pretendió, a partir de una indagación sobre la experiencia cotidiana de los funcionarios de la PGN, determinar los puntos críticos que éstos observan en sus despachos en la gestión de quejas relacionadas con el tema de la salud. Los primeros resultados llamaron la atención sobre la dispersión que se presenta en las Procuradurías en los procesos de gestión y trámite de quejas y en consecuencia, una primera problemática se fue perfilando: ¿Cuáles son las rutas de trámite de quejas en las distintas entidades relacionadas con la salud y cuáles son los temas más recurrentes de contenido de las quejas tramitadas?

Al avanzar en la exploración de las rutas de gestión y trámite de quejas, el equipo del proyecto se encontró con datos reveladores sobre la configuración de los procesos de atención de las quejas por parte de las instituciones que hacen parte del Ministerio Público. Sin embargo, las quejas relacionadas con la salud también son remitidas a las entidades que hacen parte del subsistema de Inspección, Vigilancia y Control (IVC), propio del Sistema General de Seguridad Social en Salud, es decir, las direcciones locales, seccio-

---

14. Ver Darío Indalecio Restrepo, Raúl Ernesto Cárdenas (2008). "Entre la indiferencia y la informalidad: evaluación del sistema de inspección, vigilancia y control" en Óscar Rodríguez (dir.) (2007). *¿Ha mejorado el acceso en salud? Evaluación de los procesos del régimen subsidiado*. Bogotá, Ministerio de la Protección Social - Programa de Apoyo a la Reforma de Salud (PARS), Centro de Investigaciones para el Desarrollo (CID) - Universidad Nacional de Colombia.

nales y departamentales de Salud y la Superintendencia Nacional de Salud, entre otras, razón por la cual se avanzó también en la aproximación a los trámites propios de estas instituciones. El trabajo de campo permitió comprobar que frecuentemente las quejas desbordan la capacidad administrativa de las diferentes instituciones, y éstas quedan en muchas oportunidades a merced de la disponibilidad y disposición de los funcionarios que las reciben, dada la ausencia, en la mayoría de los casos, de un criterio claro y único para el registro, trámite y seguimiento, por lo que se concluye que estos procesos son muy diferentes en cada una de las instituciones visitadas<sup>1</sup>. Por ello no fue posible hacer un análisis estadístico cuantitativo, porque precisamente uno de los hallazgos fue la multiplicidad de variables utilizadas para el registro y seguimiento de las quejas, así como las deficiencias en la sistematización de las mismas para la mayoría de las entidades. Además, en muchos casos, las quejas son remitidas a más de una institución, con lo cual se crea una duplicidad que imposibilitó la consolidación del universo total de las mismas, requerido para un análisis de ese tipo. En consecuencia, la pretensión inicial de hacer una categorización estadística de las quejas recibidas en las tres ciudades colombianas escogidas para concentrar el análisis (Bogotá, Barranquilla y Pereira) se reconsideró y la alternativa escogida fue optar por llevar a cabo un muestreo de quejas recopiladas en algunas de las instituciones ubicadas en Bogotá, seleccionando 40 casos de manera aleatoria entre los recibidos y tramitados en el año 2006, con el propósito de determinar el grado de acceso que tienen los usuarios a cada institución, los motivos más frecuentes de queja, la caracterización de la población quejosa, y el trámite dado a los requerimientos en las distintas entidades. Para tal efecto, y con el fin de tener el panorama más global del fenómeno, se escogieron quejas de los organismos de control internos al sistema de salud, tanto locales (secretarías de salud) como nacionales (Superintendencia de Salud), y de lo que denominamos organismos externos de control, asociados al Ministerio Público (Procuraduría General de la Nación, Defensoría del Pueblo y personerías).

Igualmente se hizo un esfuerzo por observar algunos impactos diferenciados en las poblaciones más vulnerables, por lo cual se trató de profundizar en el análisis del funcionamiento del subsistema de inspección, vigilancia y control en relación con los afiliados del régimen subsidiado, en el entendido de que éste es el mecanismo de acceso para este tipo de población. No obstante, varias veces esta mirada específica no fue posible, debido a que los mecanismos de manejo de la información sobre quejas no permiten en todos los casos obtener información sobre los usuarios en la cual se distinga entre afiliados del régimen contributivo y del subsidiado. Las quejas registradas tampoco permiten caracterizar a la población que presenta la queja según criterios potencialmente discriminatorios (como estrato social o género o pertenencia étnica), lo cual pone en evidencia un gran problema del SIVC, en tanto se puede afirmar que carece de un enfoque diferencial respecto de las poblaciones más vulnerables, lo cual es un requisito en la formulación de políticas públicas en materia de derechos humanos.

El análisis cuantitativo y cualitativo de las quejas se completa con entrevistas semiestructuradas con funcionarios encargados del trámite de quejas y peticiones de las secretarías

---

1. Los procesos de atención, clasificación y registro de las quejas son altamente diferenciados en las distintas instituciones visitadas, y se mantiene un patrón de soluciones informales más marcado en las ciudades diferentes a Bogotá. En este sentido, las instituciones de nivel nacional y de Bogotá presentan los mejores sistemas de atención, registro y clasificación. Por el contrario, en Barranquilla y Pereira, la informalidad prima en la solución de las quejas y por lo tanto no se deja registro alguno de las actuaciones que se realizan.

municipales de salud de Pereira y Barranquilla y de la Secretaría Distrital de Bogotá, los servidores cuyas competencias están relacionadas con el tema de la salud, y funcionarios de la Procuraduría General de la Nación del orden nacional y territorial; funcionarios de la Defensoría del Pueblo del orden nacional; las personerías de Bogotá, Pereira y Barranquilla; funcionarios de la Superintendencia Nacional de Salud; y expertos en el tema de la salud<sup>16</sup>. Las entrevistas estuvieron dirigidas a indagar sobre el funcionamiento general de la función de trámite de quejas y control que desempeña cada institución en el engranaje general de control del SGSSS; el procedimiento para el trámite de quejas aplicado en cada institución en lo administrativo, la percepción del funcionario sobre el funcionamiento general del SGSSS y el papel que desempeña dentro de éste la función de IVC.

Los resultados arrojados por las entrevistas llevadas a cabo, acompañados por la minuciosa revisión de las fuentes secundarias, le permitieron al equipo avanzar en algunas conclusiones y proponerse nuevas preguntas para enriquecer la formulación de la hipótesis de investigación. El interés inicial de aproximarse a las quejas en salud y el trámite que se le da a las mismas por las distintas instituciones, respondería a la pregunta de cómo las entidades de control, propias del SGSSS, y las externas, como el Ministerio Público, tramitan las quejas relacionadas con situaciones vulneratorias del derecho a la salud. Sin embargo, a partir de la identificación de las fallas propias del sistema de vigilancia y control administrativo aparece la pregunta acerca de las posibilidades de control judicial, que encuentran su principal expresión en la acción de tutela. Así se perfila la necesidad de dilucidar la relación entre el funcionamiento del sistema de trámite de quejas y el creciente número de tutelas en salud, y hasta qué punto la vía judicial resulta siendo la única capaz de garantizar el derecho a la salud y de contribuir a la adecuación del contenido del derecho previsto en el modelo de SGSSS a los estándares internacionales, aunque sea a título individual. Esta solución origina, obviamente, una gran congestión y una cierta “judicialización” de la política de salud, con potencialidades pero también con riesgos importantes<sup>17</sup>.

Por ello el equipo investigador decidió también analizar las potencialidades y los límites de la tutela, como una especie de forma sustituta de vigilancia y control, que podría configurar una vía alterna de acceso a los servicios de salud. Para ello no sólo se revisaron las principales investigaciones que se habían hecho sobre la tutela en salud, en especial los estudios de la Defensoría del Pueblo, del CES y de la OISS (Organización Iberoamericana de Seguridad Social) sino que se aprovechó una base de datos y una investigación desarrollada por DeJuSticia sobre el alcance de la protección de la tutela en materia de derechos sociales.

Las anteriores consideraciones explican entonces la estructura del presente informe, el cual está dividido en dos partes. La primera, que está fundada esencialmente en fuentes

16. Las entrevistas se llevaron a cabo de manera personal con visitas a las instituciones en mención, o vía telefónica para el caso de la PGN de Barranquilla y Pereira y la Secretaría de Salud de Pereira.

17. Sobre el fenómeno de la judicialización para América Latina, sus potencialidades democráticas pero también sus riesgos, ver Rachel Sieder, Line Schjolden y Alan Angell (eds.). *The Judicialisation of Politics in Latin America*. Nueva York, Palgrave Macmillan, 200. Para el caso colombiano, ver Rodrigo Uprimny (2007). “La judicialización de la política: casos, potencialidades y riesgos” en *Revista Sur*, No. 6.

secundarias, realiza una aproximación general al sistema de salud colombiano desde una perspectiva de derechos humanos, mientras que la segunda parte, que combina fuentes secundarias y fuentes primarias de análisis, se centra en el SIVC.

La primera parte, a su vez, comprende dos capítulos. Así, el primer capítulo presenta brevemente los contenidos del derecho a la salud a partir de los estándares internacionales, el bloque de constitucionalidad y la jurisprudencia nacional que ha desarrollado ampliamente el tema, lo que constituye el marco general para la comprensión del derecho. En seguida, en el segundo capítulo, se hace una descripción del modelo instaurado por la Ley 100 de 1993, que da forma al SGSSS. Se trata pues en ese capítulo de describir y valorar, desde una perspectiva de derechos humanos, la política adoptada por el Estado colombiano para satisfacer el derecho a la salud, por lo que también se estudian brevemente los resultados del sistema, para sustentar la tesis de que éste, a pesar de avances importantes en ciertos aspectos, no ha logrado realmente garantizar a los habitantes el derecho a la salud en los términos reconocidos por la Constitución y por los tratados de derechos humanos ratificados por nuestro país.

La segunda parte, que como ya se explicó está centrada en el SIVC, está dividida en tres capítulos (3, 4 y 5). Así, el capítulo 3 presenta, a partir de una perspectiva de la teoría de los sistemas, el sistema de salud tal y como éste fue estructurado por la Ley 100 de 1993 y por sus sucesivas reformas y reglamentaciones, haciendo especial énfasis en el SIVC. En efecto, esta institucionalidad y normatividad incorpora dentro de su estructura un subsistema de inspección, vigilancia y control, que está definido normativamente y está conformado por una serie de instituciones llamadas a cumplir funciones determinadas como parte del engranaje general de todo el sistema. La asunción de una perspectiva de teoría de sistemas nos pareció una herramienta útil para describir y valorar el funcionamiento del sistema de salud, que precisamente aspira a funcionar como un sistema.

Estas instancias funcionan paralelamente con otros niveles de control y trámite de quejas, como el que opera en las entidades promotoras y prestadoras de salud a través de las oficinas de atención al usuario y los mecanismos propios del ejercicio de control social. Pero todos estos dispositivos de control administrativo propios del SGSSS resultan insuficientes para corregir las distorsiones y atender los reclamos de los usuarios, que al encontrarse frente al desconocimiento o vulneración del derecho se ven abocados a recurrir a otras instituciones en las cuales reconocen una capacidad de representación y defensa de sus intereses: la Procuraduría General de la Nación, la Defensoría del Pueblo y las Personerías Municipales. Estas entidades, aunque no están dedicadas exclusivamente al trámite de las quejas en salud, sí reciben y dan curso a muchas de las reclamaciones por situaciones relacionadas, por lo cual deben incluirse como parte de la estructura encargada del manejo administrativo de las quejas en salud, descrita con detalle en el capítulo 3. Una precisión es necesaria: es importante aclarar que el eje del estudio está en el control institucional estatal, lo que obliga a centrar el análisis en algunas de las entidades del SGSSS que tienen asignadas funciones de inspección, vigilancia y control, y en los organismos del Ministerio Público que apoyan dicha labor. Esto explica que no se haga referencia a los mecanismos de control y recepción de quejas de las oficinas de atención al usuario de las entidades promotoras de salud ni de las instituciones prestadoras, ni que tampoco se aborde en profundidad el control social, representado en la labor que ejercen las veedurías, comités ciudadanos y los propios usuarios, entre otros.

Una vez definido el marco general del sistema de salud en perspectiva de derechos humanos (primera parte) y presentado, con base en una perspectiva de teoría de sistemas, el subsistema de inspección, vigilancia y control, el siguiente capítulo aborda las reflexiones acerca del funcionamiento del SIVC y sus efectos en la garantía del derecho. Especial importancia tienen aquí los hallazgos referidos a la capacidad real del SIVC para generar insumos y aportar los correctivos para los problemas que se suscitan en la realización del derecho y para responder a las obligaciones estatales relacionadas, pues conforme a lo establecido por el Comité de Derechos Económicos Sociales y Culturales de Naciones Unidas, se considera que la obligación estatal de proteger el derecho a la salud incluye la de “velar por que la privatización del sector de la salud no represente una amenaza para la disponibilidad, accesibilidad, aceptabilidad y calidad de los servicios de atención de la salud”<sup>18</sup>. Por ello, conforme a estos estándares, se configura una violación a la obligación estatal de cumplir por “la no vigilancia del ejercicio del derecho a la salud en el plano nacional”.<sup>19</sup> A partir de lo anterior, aquí se constata la frágil configuración del subsistema de inspección, vigilancia y control que afecta sus posibilidades de incidencia real en la formulación de soluciones o ajustes para contrarrestar las fallas del SGSSS, lo que ha generado que se acuda al recurso judicial para obtener la satisfacción del derecho o la solución de requerimientos que no se logran resolver adecuadamente a través de las vías administrativas. Así se está reforzando la búsqueda de alternativas para el reclamo de garantía del derecho a la salud en el plano judicial y especialmente el fortalecimiento de la jurisdicción de tutela, como instrumento para alcanzar el acceso efectivo al derecho a la salud de los colombianos. Sin embargo, pese a que la tutela es un mecanismo ágil y efectivo para la garantía del derecho a la salud, también hay limitaciones y problemas derivados de su uso frecuente, que han generado respuestas institucionales diversas, lo que merece un análisis separado, que se lleva a cabo en el capítulo, que precisamente estudia las potencialidades y los límites de la tutela para la satisfacción del derecho a la salud.

Los principales resultados a los que hemos llegado se explican en el último capítulo de este texto, que condensa no sólo las conclusiones generales del estudio sino que además formula recomendaciones específicas destinadas a que el funcionamiento del sistema de salud en general, y de su subsistema de inspección, vigilancia y control en particular, estén realmente orientados a la satisfacción del derecho a la salud de todas las personas residentes en Colombia, conforme a los estándares constitucionales y de derechos humanos. Esperamos que esas recomendaciones sean útiles para la mejora del sistema de salud en general y en particular para la labor que ejerce en materia de inspección, vigilancia y control la Superintendencia Nacional de Salud, así como el proceso de acompañamiento que hace el Ministerio Público, y en especial el llevado a cabo por la Procuraduría General de la Nación.

---

18. Naciones Unidas. Consejo Económico y Social. Comité de Derechos Económicos, Sociales y Culturales. Observación General N° 14 (2000). Documento E/C.12/2000/4 del 11 de agosto de 2000. La observación analiza el derecho al disfrute del más alto nivel posible de salud consagrado en el artículo 12 del Pacto Internacional de Derechos Económicos, Sociales y Culturales. párr. 3.

19. *Ibid*, párr. 2.



# PRIMERA PARTE

## El sistema colombiano de salud a la luz del derecho humano a la salud

La primera parte de este informe está dedicada a realizar una presentación contextual del sistema de salud colombiano en perspectiva de derechos humanos, esto es, a la luz del contenido y los alcances del derecho a la salud. Para ello se comienza por ubicar en el contexto general los contenidos del derecho a la salud de conformidad con los principales instrumentos internacionales ratificados por Colombia y la normatividad nacional que lo protegen, y a ofrecer una descripción del modelo vigente en Colombia para la garantía de este derecho a partir de la reforma operada con la entrada en vigor de la Ley 100 de 1993 y el diseño institucional incorporado en ella. Posteriormente y a partir de lo anterior, es posible identificar tanto algunos de los principales desafíos a los que quiso responder el modelo, así como los avances que se han logrado y los problemas que persisten y que no se han podido superar adecuadamente. Esto explica el ordenamiento en capítulos. Así, el primer capítulo aborda el marco normativo y delimita los alcances y contenidos del derecho a la salud. El segundo capítulo precisa el marco institucional y la política pública desarrollada por el Estado colombiano para satisfacer el derecho a la salud, para lo cual explica el contexto de aprobación de la Ley 100 de 1993 y sus principales diseños institucionales. Ese capítulo también analiza brevemente los resultados del modelo, para lo cual presenta, sin pretensiones de exhaustividad, algunos indicadores del impacto del esquema adoptado desde 1993 para el goce del derecho a la salud de los colombianos.

Estos dos capítulos están basados esencialmente en fuentes secundarias. Por consiguiente, no pretendemos en esta parte del estudio aportar información empírica novedosa sobre estos tres temas, que ya han sido abordados con algún detalle por documentos internacionales o por estudios nacionales, algunos de gran calidad. Nuestra pretensión es más modesta: buscamos esencialmente presentar pedagógicamente el tema para aclarar nuestro marco normativo de análisis y precisar la hipótesis que desarrollamos, con fuentes primarias, en la segunda parte del informe. En efecto, esta primera parte nos permite una lectura del sistema de salud colombiano en una perspectiva del derecho a la salud, que muestra sus avances, pero también sus limitaciones y retrocesos. De esta manera podemos no sólo precisar nuestra perspectiva normativa sino además sustentar la tesis de que el sistema adoptado por la Ley 100 no ha cumplido sus promesas de satisfacer en forma integral y universal el derecho a la salud de todos los colombianos. Además, la mirada global de algunos de los principales problemas que enfrenta el sistema de salud en relación con la garantía efectiva del derecho nos lleva a reconsiderar la importancia de los mecanismos de regulación y control previstos en la ley para garantizar el adecuado funcionamiento del sistema de salud, tema que será objeto de un análisis detallado en la segunda parte del informe.



## CAPÍTULO 1

### El marco normativo: el derecho a la salud como derecho humano

*“Es mi aspiración que la salud sea vista no como una bendición deseable, sino como un derecho humano por el cual luchar”<sup>20</sup>.*

Antes de entrar a abordar la reflexión sobre el derecho a la salud habría que plantearse la realidad en torno a los derechos humanos en una sociedad como la nuestra. No parece razonable aspirar a que se cumpla un derecho específico, en este caso el de la salud, si no rige una noción de defensa y respeto al espíritu que fundamenta el derecho internacional de los derechos humanos. Evidentemente éste se encuentra incorporado a nuestro ordenamiento constitucional, jurídico, institucional, y por tanto obliga al Estado como parte de estos instrumentos internacionales, pero no se podría considerar que la sociedad colombiana haya asumido los derechos humanos como una visión rectora ni de las relaciones del Estado con las personas, ni del valor de la dignidad individual. De tal forma, la realización del derecho a la salud probablemente adolece de las mismas debilidades que cualquier otro derecho en el país y su realización se enfrenta con los mismos obstáculos. Podría decirse que las debilidades que afectan su potencial como derecho derivan de la “salud” de los derechos humanos en nuestro contexto.

La anterior consideración, que da cuenta de las debilidades presentes en el entorno en términos de conciencia y compromiso desde una lógica de derechos humanos subyacente a las políticas públicas y reflejada en el lento desarrollo normativo de cada una de las obligaciones internacionales adquiridas, afirma la importancia de que jurídicamente el derecho esté protegido de manera sólida, y sustenta la necesidad de mecanismos estrictos de vigilancia y control como elementos necesarios para su efectividad.

Tal como se conceptualiza en el derecho internacional de los derechos humanos, el derecho a la salud es un bien jurídico exigible al Estado como parte de la consagración de los derechos económicos, sociales y culturales (DESC). El Estado colombiano quedó obligado a partir de la ratificación de los instrumentos de derecho internacional, bajo el principio de

---

20. Kofi Annan, Secretario General de las Naciones Unidas. Traducción libre de la frase original: “It is my aspiration that health will finally be seen not as a blessing to be wished for, but as a human right to be fought for”.

*pacta sunt servanda*, lo que en el caso de la salud, como todos los derechos humanos, deriva de la noción de respeto a la dignidad humana y significa un avance en los compromisos morales y políticos de las sociedades.

Los derechos económicos, sociales y culturales se rigen por los principios que definen todos los derechos consagrados en el derecho internacional: universalidad, indivisibilidad e interdependencia<sup>21</sup>. Tales principios hacen que se apliquen las mismas exigencias para su realización que aquellas que se imponen en el respeto a los derechos civiles y políticos, es decir, medidas adecuadas y efectivas de promoción, respeto y garantía, con la misma obligación de resultado, aun si, como veremos más adelante, ésta se entiende en parte en términos de resultado “progresivo”, a diferencia de los derechos civiles y políticos para los que se exige, en parte, una efectividad inmediata.

De esta forma, la reflexión sobre la salud concebida como un derecho humano nos ubica en la necesidad de referirnos a: i) la discusión acerca de su naturaleza jurídica; ii) el marco normativo internacional a partir del cual se definen los componentes del derecho; para luego iii) precisar el contenido de ese derecho conforme a la doctrina internacional (disponibilidad, accesibilidad, aceptabilidad y calidad) y las correlativas obligaciones estatales. Finalmente, iv) abordaremos la normatividad nacional relacionada, lo que permitirá una mirada sobre la recepción que han tenido internamente los estándares internacionales de protección. Cada uno de estos elementos será entonces desarrollado a continuación.

### 1.1. Los debates acerca de la naturaleza jurídica del derecho a la salud<sup>22</sup>

El tema de la protección del derecho a la salud en el derecho internacional de los derechos humanos tiende a generar debate en dos sentidos relacionados con su naturaleza jurídica. Por una parte surge el interrogante en cuanto a si es un derecho fundamental en sí mismo, o si lo es por conexidad con el derecho a la vida y otros derechos. Por otra parte, la salud como derecho se inscribe dentro de los derechos económicos, sociales y culturales, lo cual implica unos términos de protección y realización del derecho comunes a este género, con algunas diferencias frente a los que obligan a los Estados en relación con los derechos civiles y políticos.

La salud en perspectiva de derechos humanos se enmarca en la normatividad internacional y en consecuencia en el cumplimiento de las obligaciones que son responsabilidad del Estado colombiano, adquiridas al suscribir los pactos internacionales pertinentes al tema<sup>23</sup>. Tanto los derechos reconocidos expresa e inicialmente como fundamentales, es

---

21. Declaración y Programa de Acción de Viena (A/CONF.17/23), 12 de julio de 1993. Conferencia Mundial de Derechos Humanos. Viena, 14 a 2 de junio de 1993.

22. Para una buena presentación de la evolución del derecho a la salud en el ámbito conceptual y jurídico, ver Mónica Arbeláez Rudas (2006). *Derecho a la salud en Colombia. El acceso a los servicios del Sistema General de Seguridad Social en Salud*. Bogotá, CINEP, Colciencias, p. 8 y ss.

23. Las obligaciones del Estado colombiano a partir de la suscripción, adhesión y ratificación de los pactos y tratados de derechos humanos se entienden incorporadas al ordenamiento nacional bajo el concepto de “bloque de constitucionalidad”. La Corte Constitucional le ha dado tres implicaciones a dicho concepto: i) normas y principios con rango constitucional; ii) normas y principios que sirven como parámetros para analizar la constitucionalidad de una disposición; iii) instrumentos jurídicos relevantes para valorar una situación fáctica específica y decidir un caso constitucional particular.

decir aquellos que asumen la protección del individuo frente al mismo poder del Estado, bien sea en la defensa de su libertad, vida, igualdad ante la ley, etc, como los derechos prestacionales, la salud entre ellos, que requieren para su efectiva realización la intervención activa y positiva del Estado. El desarrollo de la legislación e institucionalidad adecuadas o la asignación consecuente de recursos, hacen parte de la exigencia del derecho para que su realización no sea un simple enunciado sujeto a las posibilidades acordes al grado de desarrollo de los distintos Estados, o a la voluntad política de las diferentes administraciones.

Algunos sectores doctrinarios y políticos tienden a cuestionar la fuerza jurídica de los derechos sociales y su entendimiento como derechos exigibles, con el argumento de que se trata de derechos de realización progresiva, que requieren la asignación de recursos y desarrollos legales, de manera que su satisfacción depende de la voluntad de los órganos políticos de decisión, en especial de los parlamentos. Para otro sector de la doctrina y para el Comité de Derechos Económicos, Sociales y Culturales (en adelante Comité DESC) esto no es así, pues se ha mostrado que hay obligaciones de realización inmediata en relación con los derechos sociales y que para el caso de salud son también determinadas.

Como lo han señalado numerosos autores<sup>24</sup> y el propio Comité DESC, que es el intérprete autorizado del Pacto, esa diferencia debe relativizarse, pues los DESC también tienen obligaciones de inmediato cumplimiento –como la prohibición de discriminación– y el mandato de progresividad no es una autorización para la inacción de los Estados. En particular, en su período No. 22 de sesiones, el 11 de mayo de 2000, el Comité DESC adoptó la *Observación General No. 14 relativa al disfrute del más alto nivel de salud (art. 12)*.

En ese comentario autorizado al artículo 12 del Pacto, el Comité destaca ciertos puntos que son importantes. De un lado, caracteriza a la salud como un “derecho humano fundamental” (Párr. 1), que debe ser amparado a todas las personas, lo cual es un desarrollo de ese artículo 12 del Pacto, que establece, entre otras cosas, que los Estados deben crear “condiciones que aseguren a todos asistencia médica y servicios médicos en caso de enfermedad”. Luego el Comité establece ciertos “elementos esenciales e interrelacionados” que hacen parte del contenido de ese derecho a la salud, como la disponibilidad, la accesibilidad, la aceptabilidad y la calidad de los bienes y servicios de salud (Párr. 12). Posteriormente el Comité desarrolla el alcance del principio de igualdad en salud, que supone no sólo la prohibición de discriminar en el acceso a esos servicios sino el deber de las autoridades de favorecer especialmente a ciertas poblaciones (Párrs. 18 a 27). Finalmente, en cuanto al alcance de la obligación estatal en la materia, el Comité reconoce que existen limitaciones de recursos que obstaculizan el pleno goce de este derecho, por lo cual la obligación estatal es progresiva. Sin embargo, el Comité destaca que la progresividad no priva de contenido la obligación estatal, al menos en los siguientes cuatro

Ver Rodrigo Uprimny (2002). “El bloque de constitucionalidad en Colombia. Un análisis jurisprudencial y un ensayo de sistematización doctrinal” en *Compilación de jurisprudencia y doctrina nacional e internacional: derechos humanos y derecho internacional humanitario*. Oficina en Colombia del Alto Comisionado de las Naciones Unidas para los Derechos Humanos, Vol. I, Bogotá, p.143.

24. Ver al respecto, Victor Abramovich y Christian Courtis (2002). *Los derechos sociales como derechos exigibles*, Madrid, Trotta, 2002, p. 24-37; Asbjørn Eide (199). “Economic, Social and Cultural Rights as Human Rights”, en Asbjørn Eide, Catarina Krause y Allan Rosas (eds.) (199). *Economic, Social and Cultural Rights*, Martinus Nijhoff Publishers, Dordrecht-Boston-Londres; y Henry Shue (1984). “The Interdependence of Duties” en Philip Alston and Katarina Tomasevski (eds.), *The Right to Food*, Martinus Nijhoff, Dordrecht, p. 83-9.

aspectos: (i) Existen medidas inmediatas que deben ser tomadas, como la prohibición de la discriminación en el acceso a los servicios de salud (Párr. 30); (ii) en principio las medidas regresivas, que disminuyen una protección a la salud ya alcanzada, se presumen contrarias al Pacto, por lo cual el Estado tiene que demostrar que éstas eran necesarias y que “se han aplicado tras el examen exhaustivo de todas las alternativas posibles” (Párr. 32); (iii) el Estado tiene la obligación “concreta y constante de avanzar lo más expedita y eficazmente posible hacia la plena realización” de este derecho (Párr. 31); y (iv) finalmente, existen unas obligaciones básicas en salud, que deben ser satisfechas en todo caso, sin importar los recursos de que dispone un Estado, como son el acceso no discriminatorio a los servicios de salud (Párr. 43), y unas prioridades que deben ser respetadas, como la inmunización contra las principales enfermedades infecciosas y la adopción de medidas para combatir las enfermedades epidémicas y endémicas (Párr. 44)

La Observación supera entonces el debate frente a la naturaleza del derecho, al optar por la caracterización como derecho fundamental en sí mismo. Además, el concepto de “el más alto nivel posible de salud”, dice la Observación, tiene en cuenta tanto las condiciones biológicas y socioeconómicas esenciales de la persona como los recursos con que cuenta el Estado, de tal forma que el derecho debe entenderse como un derecho al disfrute de toda una gama de facilidades, bienes, servicios y condiciones necesarias para alcanzar el nivel señalado.

Por su parte, la Corte Constitucional ha acogido en numerosas sentencias una doctrina semejante, pues ha señalado que la naturaleza esencialmente prestacional de los derechos sociales no excluye que éstos puedan ser fundamentales en ciertos aspectos, ni vacía de contenido las obligaciones de las autoridades para lograr la plena realización de tales derechos. Así lo explicó, entre otras, en la sentencia C-21 de 1997, en donde examinó la constitucionalidad del llamado Protocolo de San Salvador sobre DESC en el ámbito americano, aprobado en Colombia mediante la Ley 319 de 1996. En esa sentencia, y luego de afirmar la relevancia constitucional de los criterios del Comité DESC y de ciertos documentos en este ámbito, como los llamados “Principios de Limburgo”<sup>2</sup>, dijo la Corte Constitucional:

*Conforme a esa doctrina, y de acuerdo al tenor literal de este artículo, resulta claro que el carácter progresivo del deber de realización de estos derechos no implica que los Estados pueden demorar la toma de las medidas necesarias para hacerlos efectivos. Por el contrario, el deber de adoptar todas las medidas posibles es inmediato, ya que los Estados “tienen la obligación de iniciar inmediatamente el proceso encaminado a la completa realización de los derechos contenidos en el Pacto” (Principio de Limburgo No 16)*

*[...].*

*De otro lado, conviene tener en cuenta que no es totalmente correcto considerar que todos los derechos sociales implican prestaciones positivas del Estado, y que todos los*

---

2. Estos “Principios de Limburgo” fueron adoptados por unos expertos en la materia reunidos en Maastricht, Holanda, en junio de 1986 y constituyen la interpretación académica más respetada sobre el sentido y la aplicación de las normas internacionales sobre derechos económicos, sociales y culturales. Ver su texto en *Human Rights Quarterly*, vol. 9, No. 2, 1987, p. 121 y ss. Fueron reconsiderados y actualizados diez años más tarde en Maastricht en enero de 1997, lo cual dio lugar a las llamadas “Directrices de Maastricht sobre violaciones a los derechos económicos, sociales y culturales”.

derechos civiles y políticos únicamente generan deberes estatales de abstención, pues la situación es más compleja. Así, la garantía de los derechos civiles supone en muchos casos deberes de intervención de las autoridades. Por ejemplo, el derecho a la intimidad implica no sólo que el Estado debe respetar mi privacidad sino también que las autoridades deben protegerme contra injerencias de terceros. Igualmente, muchos derechos considerados sociales no implican una prestación sino un deber de respeto de parte de las autoridades, similar al que opera en el campo de los derechos civiles. Así sucede por ejemplo con el derecho de sindicalización de los trabajadores, que implica que el Estado debe abstenerse de interferir en el goce de este derecho. En estos eventos, es claro que esos derechos sociales, o ese componente de los derechos sociales, no es de realización progresiva sino de aplicación inmediata.

Finalmente, el deber de realización progresiva de los derechos sociales prestacionales no significa que no pueda haber violación de los mismos, debido a omisiones del Estado o a actuaciones insuficientes de su parte. En efecto, así como existe un contenido esencial de los derechos civiles y políticos, la doctrina internacional considera que existe un contenido esencial de los derechos económicos y sociales, el cual se materializa en los “derechos mínimos de subsistencia para todos, sea cual fuere el nivel de desarrollo económico” (Principio de Limburgo No. 25). Por ende, se considera que existe una violación a las obligaciones internacionales si los Estados no aseguran ese mínimo vital, salvo que existan poderosas razones que justifiquen la situación. Además, el Estado adquiere el compromiso de tomar “todas las medidas que sean necesarias, y, hasta el máximo de los recursos disponibles”, por lo cual, si se constata que los recursos no han sido adecuadamente utilizados para la realización de estos derechos, también se puede considerar que el Estado está incumpliendo sus obligaciones internacionales, por lo cual “al determinar si se han adoptado las medidas adecuadas para la realización de los derechos reconocidos por el Pacto, se deberá prestar atención a la utilización eficaz y equitativa y la oportunidad de acceder a los recursos disponibles (Principio de Limburgo No. 27)”. Conforme a lo anterior, según el Principio de Limburgo No. 72, un Estado Parte comete una violación de los derechos económicos, sociales y culturales si, por ejemplo, “no logra adoptar una medida exigida por el Pacto, no logra remover, a la mayor brevedad posible y cuando deba hacerlo, todos los obstáculos que impidan la realización inmediata de un derecho; no logra aplicar con rapidez un derecho que el Pacto exige; no logra, intencionalmente, satisfacer una norma internacional mínima de realización, generalmente aceptada y para cuya satisfacción está capacitado; o adopta una limitación a un derecho reconocido en el Pacto por vías contrarias al mismo”<sup>26</sup>.

Por consiguiente, conforme a la más autorizada doctrina internacional y constitucional, el derecho a la salud es un derecho humano fundamental, que aunque es de desarrollo progresivo, impone a las autoridades estatales obligaciones específicas inmediatas.

## 1.2. Marco normativo internacional

Una vez precisada la naturaleza del derecho a la salud, procederemos a recordar brevemente los principales tratados que reconocen este derecho. Y es que existe una serie

26. Sentencia C-21 de 1997, M.P. Alejandro Martínez Caballero, Fundamento 8.

de instrumentos jurídicos internacionales en los cuales está expresamente reconocido el derecho a la salud; ellos constituyen el parámetro que delimita el contenido del derecho, la responsabilidad del Estado y el ámbito de protección que puede exigir toda persona. Es posible organizarlos distinguiendo en el ámbito universal los que hacen parte del Sistema de Naciones Unidas, y en lo regional los instrumentos propios del Sistema Interamericano de Derechos Humanos.

### 1.2.1. Sistema de las Naciones Unidas

– La **Declaración Universal de Derechos Humanos** protege explícitamente el derecho a la salud al decir que: “toda persona tiene derecho a un nivel de vida adecuado que le asegure, así como a su familia, la salud y en especial la alimentación, el vestido, la vivienda, la asistencia médica y los servicios sociales necesarios”<sup>27</sup>.

– El **Pacto Internacional de Derechos Civiles y Políticos**, en el artículo 7, dispone que “nadie será sometido a torturas ni a penas o tratos crueles, inhumanos o degradantes. En particular, nadie será sometido sin su libre consentimiento a experimentos médicos científicos”. Este pacto fue aprobado por Colombia mediante la Ley 74 de 1968.

– El **Pacto Internacional de Derechos Económicos Sociales y Culturales** que entró en vigor para Colombia desde 1968, en su artículo 12 contiene una de las disposiciones de desarrollo más amplio en derecho internacional de los derechos humanos sobre el derecho a la salud. Dice esta disposición:

#### *Artículo 12*

1. Los Estados Partes en el presente Pacto reconocen el derecho de toda persona al disfrute del más alto nivel posible de salud física y mental.
2. Entre las medidas que deberán adoptar los Estados Partes en el Pacto a fin de asegurar la plena efectividad de este derecho, figuran las necesarias para:
  - a) La reducción de la mortalidad y de la mortalidad infantil, y el sano desarrollo de los niños;
  - b) El mejoramiento en todos sus aspectos de la higiene del trabajo y del medio ambiente;
  - c) La prevención y el tratamiento de las enfermedades epidémicas, endémicas, profesionales y de otra índole, y la lucha contra ellas;
  - d) La creación de condiciones que aseguren a todos asistencia médica y servicios médicos en caso de enfermedad.

El Comité DESC es el órgano de supervisión del Pacto y está encargado de vigilar el cumplimiento de sus disposiciones y de asegurar la correcta interpretación de cada una

---

27. Artículo 2. Es de resaltar que no introduce el concepto de gratuidad, como sí lo especifica en el artículo 26 en relación con el derecho a la educación.

de ellas. Para ello examina los informes presentados por cada uno de los Estados partes<sup>28</sup> y mediante recomendaciones y observaciones generales explica el contenido y alcance de cada derecho, a fin de que los Estados deriven de éstas el desarrollo normativo, las políticas, las instituciones y los programas requeridos<sup>29</sup>. En lo referente al derecho a la salud, y como ya se explicó, el Comité produjo la Observación General No. 14 relativa al Artículo 12<sup>30</sup>, que define la naturaleza, el contenido y alcance del derecho a partir de la inclusión de elementos y procedimientos complementarios, inherentes a la afirmación de la salud como “derecho humano fundamental e indispensable para el ejercicio de los demás derechos humanos”.

En cuanto a las medidas indicadas en el párrafo 2 del Artículo 12 del Pacto con el fin de asegurar la efectividad del derecho, los apartados a, b, c y d constituyen, en concepto del Comité, una lista incompleta de ejemplos dados a modo de orientación para definir todas las que deben adoptar los Estados.

La disposición relativa a la reducción de la mortalidad y de la mortalidad infantil y el sano desarrollo de los niños (apartado a)) se amplía e implica el amparo a condiciones relacionadas con la salud materna, infantil y reproductiva.

El apartado b), referido a la higiene en el trabajo y el medio ambiente, implica la adopción de medidas preventivas respecto de accidentes laborales y enfermedades profesionales; el suministro de agua potable; la reducción de la exposición de la población a sustancias nocivas, químicas, etc.

La prevención y lucha contra enfermedades epidémicas (apartado c)) “tiene que ver con los esfuerzos individuales y colectivos de los Estados para facilitar, entre otras cosas, las tecnologías pertinentes, el empleo y la mejora de la vigilancia epidemiológica [...] y otras estrategias de lucha contra las enfermedades infecciosas”.

El apartado d) exige prevención y educación, programas de reconocimiento periódico, además de la organización del sector de la salud, el sistema de seguros y en particular la participación en las decisiones políticas en el plano comunitario y nacional.

La posibilidad de cumplir el nivel de satisfacción del derecho estipulado en el Pacto, de ampliarlo a todos los sujetos sin discriminación y dentro de todos los elementos que lo constituyen, abarca, como lo señala la Observación, la conformación de un sistema de protección que incluye derechos complementarios protegidos en otros instrumentos internacionales.

---

28. El último informe del Gobierno colombiano fue radicado ante el Comité en febrero de 2008.

29. Las observaciones generales del Comité DESC como intérprete autorizado del PIDESC configuran disposiciones de lo que se denomina “soft law”, es decir, textos jurídicos que sin ser estrictamente vinculantes tienen relevancia jurídica. Es pertinente anotar que la Corte Constitucional ha señalado que las observaciones generales del Comité DESC deben ser tenidas en cuenta por los operadores jurídicos al interpretar, aplicar y realizar los derechos económicos sociales y culturales. Ver sentencias C-21 de 1997 y T-98 de 2001, entre otras. Sobre la noción de “soft law” en derechos humanos y en derecho constitucional, ver Rodrigo Uprimny (2006). *Bloque de constitucionalidad, derechos humanos y proceso penal*. Bogotá, Consejo Superior de la Judicatura, Universidad Nacional, en especial el capítulo 2.

30. Adoptada en el 22º período de sesiones, Ginebra, 2 de abril a 12 de mayo de 2000.

Sin embargo, desde la adopción del Pacto (1966), el concepto de salud ha evolucionado en su contenido y alcance y así la vida, la alimentación, la vivienda, el trabajo, la educación, la dignidad humana, la no discriminación, la igualdad, el acceso a la información, la libertad de asociación, de reunión y de circulación entre otros, han quedado vinculados como componentes integrales del concepto del derecho a disfrutar “del más alto nivel posible de salud física y mental”.

Así mismo las consideraciones sobre la participación de la población en todo el proceso de adopción de decisiones en el plano comunitario, nacional e internacional, son un aspecto innovador y trascendente para la vigencia y control del derecho, y probablemente sea allí donde radica la posibilidad de diferenciar entre el Estado que ofrece un “servicio” y el Estado que asume el cumplimiento efectivo y cabal de sus obligaciones frente a la realización de los derechos.

En cuanto a las obligaciones surgidas del Pacto, la Observación General N° 3, emitida por el mismo Comité, habla del compromiso de adoptar medidas pertinentes, no limitadas ni condicionadas por otras consideraciones, por ejemplo, de recursos. Las medidas deben ser deliberadas y concretas, orientadas claramente a la satisfacción de las obligaciones reconocidas en el Pacto y “por todos los medios apropiados”<sup>31</sup>. El Comité señala además la conveniencia de que los Estados justifiquen en sus informes la categoría de “apropiadas” en referencia a las medidas adoptadas, por cuanto se han comprometido a presentar “informes sobre las medidas que hayan adoptado, y los progresos realizados, con el fin de asegurar el respeto a los derechos reconocidos en el mismo”<sup>32</sup>.

Los conceptos de “progresiva efectividad” y de “obligación de resultados” derivan del artículo 2 del Pacto, según el cual cada Estado

*... se compromete a adoptar medidas, tanto por separado como mediante la asistencia y la cooperación internacionales, especialmente económicas y técnicas, hasta el máximo de los recursos de que disponga, para lograr progresivamente, por todos los medios apropiados, inclusive en particular la adopción de medidas legislativas, la plena efectividad de los derechos aquí reconocidos.*

Al respecto el Comité pone de relieve que aunque se demuestre la insuficiencia de recursos disponibles, se mantiene la obligación de garantía y en consecuencia también la obligación de vigilar la realización o no realización de los derechos permanece. De manera análoga, subraya el Comité, aun en caso de limitaciones graves (crisis económica, procesos de ajuste u otros factores) se puede y se debe proteger a los grupos más vulnerables.

En el mismo sentido, el Comité del Pacto adoptó una declaración en mayo de 1998 referida a la “globalización y los DESC” en razón de la preocupación porque dicho fenómeno pueda desplazar las obligaciones y particularmente las prioridades de satisfacción de los derechos, por ejemplo, que en los servicios básicos de salud, las políticas de recuperación

---

31. Artículo 2.

32. Artículo 16.

de costos puedan dar base a una reducción de los servicios, si no están acompañadas de medidas que los salvaguarden.

– La **Convención Internacional sobre la Eliminación de Todas las Formas de Discriminación Racial** (196, en vigor a partir de su aprobación mediante la Ley 22 de 1981) reconoce el derecho a la salud pública, la asistencia médica, la seguridad social y los servicios sociales.

– La **Convención sobre la Eliminación de Todas las Formas de Discriminación contra la Mujer**, (1979, en vigor para Colombia a partir de su aprobación mediante la Ley 1 de 1981) incluye el derecho a la protección de la salud y a la seguridad en las condiciones de trabajo, incluso la salvaguardia de la función de reproducción; el acceso a los servicios que se refieren a la planificación familiar, el período posterior al parto, y la nutrición adecuada durante el embarazo y lactancia.

– La **Convención sobre los Derechos del Niño** (1989, en vigor para Colombia desde su aprobación a través de la Ley 12 de 1991) demanda en el artículo 24 la plena aplicación del derecho a la salud y la adopción de medidas mediante, entre otras cosas, la aplicación de la tecnología disponible, el suministro de alimentos nutritivos adecuados y agua potable salubre; la atención sanitaria prenatal y posnatal apropiada a las madres; y el desarrollo de atención sanitaria preventiva. Requiere la adopción de las medidas eficaces y apropiadas posibles para abolir las prácticas tradicionales que sean perjudiciales para la salud del niño. Compromete a los Estados Partes a “promover y alentar la cooperación internacional con miras a lograr progresivamente la plena realización del derecho reconocido en este artículo. A este respecto, se tendrán plenamente en cuenta las necesidades de los países en desarrollo”. De esta forma, se introducen conceptos importantes como el de revisar prácticas culturales tradicionales que puedan afectar negativamente el derecho, así como la responsabilidad específica de los países más desarrollados, frente a la posibilidad de realización de éste en condiciones de subdesarrollo propias de otros Estados.

Finalmente hay otra serie de instrumentos internacionales que están referidos al derecho a la salud de otros grupos poblacionales específicos, como los trabajadores<sup>33</sup>, las personas privadas de la libertad<sup>34</sup>, las personas en situación de desplazamiento forzado<sup>35</sup>, las personas con discapacidad<sup>36</sup>, las minorías étnicas y raciales<sup>37</sup>, los adultos mayores<sup>38</sup> y los enfermos de sida<sup>39</sup>.

Posterior a las resoluciones de la Asamblea General de las Naciones Unidas y de la Comisión de Derechos Humanos, así como declaraciones y programas de acción del mismo

---

33. Ver entre otros el Convenio 81 sobre la inspección del trabajo e higiene industrial, el Convenio 102 sobre seguridad social y el Convenio 121 sobre accidentes de trabajo y enfermedades profesionales.

34. Principios básicos para el tratamiento de los reclusos, conjunto de principios para la protección de todas las personas sometidas a cualquier forma de detención o prisión y reglas mínimas para el tratamiento de los reclusos.

35. Artículo 17 del Protocolo II adicional a los Convenios de Ginebra, y Principios Rectores de los Desplazamientos Internos (principio 18).

36. Declaración de los Derechos de los Impedidos y Declaración de los Derechos de los Enfermos Mentales.

37. Artículo 1 de la Convención Internacional sobre la Eliminación de todas las Formas de Discriminación Racial aprobada en Colombia mediante la Ley 22 de 1981 y artículo 2 del Convenio 169 de la OIT.

38. Principios a favor de las personas de la tercera edad adoptados por la Asamblea General de Naciones Unidas mediante Resolución 46/91 del 12 de diciembre de 1991 (principios I y II).

39. Ver entre otros el Programa de Acción de la Conferencia Internacional sobre la Población y el Desarrollo adoptada en El Cairo.

Sistema, contienen definiciones y ampliaciones del reconocimiento al derecho a la salud, que fortalecen los vínculos con otros derechos, en desarrollo de los principios de universalidad, indivisibilidad e interdependencia inherentes a los derechos humanos.

### 1.2.2. Sistema Interamericano de Derechos Humanos

La **Declaración Americana de los Derechos y Deberes del Hombre**<sup>40</sup> consagra en el artículo XI el derecho de toda persona a la preservación de la salud y el bienestar.

La **Convención Americana de Derechos Humanos**<sup>41</sup> aunque no hace alusión expresa al derecho, sí afirma en su artículo 26 que los Estados partes se comprometen “a adoptar providencias, tanto a nivel interno como mediante la cooperación internacional, especialmente económica y técnica” para lograr progresivamente la plena efectividad de los derechos contenidos en la Carta de la Organización de los Estados Americanos, que en su artículo 33 hace referencia al derecho a la salud.

Así mismo el Protocolo Adicional a la Convención Americana sobre Derechos Humanos en materia de Derechos Económicos, Sociales y Culturales, o Protocolo de San Salvador suscrito en 1988, aprobado por Colombia en 1996 y que entró en vigor en 1999, protege igualmente el derecho a la salud al decir:

#### *Artículo 10*

1. *Toda persona tiene derecho a la salud, entendida como el disfrute del más alto nivel de bienestar físico, mental y social.*
2. *Con el fin de hacer efectivo el derecho a la salud los Estados partes se comprometen a reconocer la salud como un bien público y particularmente a adoptar las siguientes medidas para garantizar este derecho:*
  - a. *la atención primaria de la salud, entendiendo como tal la asistencia sanitaria esencial puesta al alcance de todos los individuos y familiares de la comunidad;*
  - b. *extensión de los beneficios de los servicios de salud a todos los individuos sujetos a la jurisdicción del Estado;*
  - c. *la total inmunización contra las principales enfermedades infecciosas;*
  - d. *la prevención y el tratamiento de las enfermedades endémicas, profesionales y de otra índole;*
  - e. *la educación de la población sobre la prevención y tratamiento de los problemas de salud, y*
  - f. *la satisfacción de las necesidades de salud de los grupos de más alto riesgo y que por sus condiciones de pobreza sean más vulnerables.*

---

40. Aprobada en la Novena Conferencia Internacional en 1948.

41. Suscrita en la Conferencia Especializada Interamericana sobre Derechos Humanos, San José, Costa Rica, 7 al 22 de noviembre de 1969.

Tal como sucede en el sistema de las Naciones Unidas, el artículo 19 de este Protocolo compromete a los Estados a elaborar y presentar informes periódicos respecto de “las medidas progresivas que hayan adoptado para asegurar el debido respeto de los derechos consagrados en el mismo protocolo”. El procedimiento posterior igualmente implica la revisión por parte de los organismos especializados del Sistema Interamericano, sobre el estado de cumplimiento o incumplimiento de las obligaciones y de las recomendaciones correspondientes.

### 1.3. Los contenidos del derecho a la salud y las obligaciones de los Estados y de las autoridades

A partir de las normas internacionales enunciadas y los desarrollos que sobre estas han producido los órganos autorizados, se ha consolidado una doctrina sobre los contenidos del derecho y las correlativas obligaciones estatales para la materialización de dichos contenidos. En cuanto a lo primero, el estudio detallado de algunos derechos ha permitido al Comité DESC delimitar cuáles son los contenidos básicos o niveles esenciales. Por ello se distinguen usualmente cuatro componentes normativos, que en el caso del derecho a la salud se caracterizan de la siguiente manera:

- **Disponibilidad.** Consiste esencialmente en que exista oferta suficiente de servicios e infraestructura asociados al goce del derecho a la salud, que se traduce en contar con un número suficiente de establecimientos, bienes y servicios de salud, por ejemplo, una red de hospitales apropiada, o los profesionales y medicamentos necesarios.
- **Accesibilidad.** Consiste en que las personas no tengan obstáculos para acceder al derecho, lo que se expresa en el acceso efectivo a los establecimientos, bienes y servicios de salud sin discriminación alguna, en condiciones que permitan el acceso físico, el económico y que puedan acceder a la información.
- **Aceptabilidad.** Está vinculada no sólo a la calidad que deben tener las prestaciones suministradas sino a la conformidad de las condiciones de realización del derecho con el contexto y a su relación con otros derechos. En virtud de este componente, los

*... establecimientos, bienes y servicios de salud deberán ser respetuosos de la ética médica, y culturalmente apropiados, es decir respetuosos de la cultura de las personas, las minorías, los pueblos y las comunidades, a la par que sensibles a los requisitos del género y ciclo de vida y deben estar concebidos para respetar la confidencialidad y mejorar el estado de salud de las personas que se trate*<sup>42</sup>.

La aceptabilidad también implica el respeto por “el derecho a controlar su salud y su cuerpo, con inclusión de la libertad sexual y genésica, y el derecho a no padecer injerencias, como el derecho a no ser sometido a torturas ni a tratamientos y experimentos médicos no consensuales”<sup>43</sup>. De este componente se derivan también derechos

42. Observación General No. 14, párrafo 12.

43. Observación General No. 14, párrafo 8.

como la confidencialidad de los datos personales relativos a la salud, el derecho a una muerte digna, la autodeterminación reproductiva, la prevención de los problemas de salud mental y la protección del cuerpo contra injerencias ajenas<sup>44</sup>.

- **Calidad.** Ésta implica que “además de ser aceptables desde el punto de vista cultural, los establecimientos, bienes y servicios de salud deben ser apropiados desde un punto de vista científico y médico y ser de buena calidad. Ello requiere entre otras cosas personal médico capacitado, medicamentos y equipo hospitalario científicamente aprobados y en buen estado, agua limpia potable y condiciones sanitarias adecuadas”<sup>4</sup>. Algunos elementos que son especialmente relevantes desde el punto de vista de la calidad tienen que ver con el derecho a que la prestación de los servicios sea llevada a cabo por personal idóneo, capacitado y que disponga de condiciones laborales adecuadas, que el servicio sea prestado en condiciones satisfactorias, que se brinden medicamentos de calidad y atención oportuna.

De otro lado, las obligaciones del Estado derivadas del PIDESC en relación con salud pueden sintetizarse en: i) la de no discriminar, que consiste en que en el desarrollo progresivo de los derechos sociales las autoridades no pueden tomar medidas discriminatorias, como excluir a ciertas poblaciones, de manera injustificada, de las prestaciones garantizadas; (ii) la obligación de adoptar inmediatamente medidas, y hasta el máximo de los recursos disponibles, para lograr la plena realización de los derechos sociales; (iii) la obligación de asegurar un contenido mínimo lo cual mostraría que es posible distinguir en los derechos sociales dos tipos de contenidos: de un lado, un contenido básico o mínimo, que debe ser asegurado de manera inmediata por los Estados, y que estaría ligado al “derecho a la subsistencia”, en la terminología del derecho internacional de los derechos humanos, o al derecho al “mínimo vital”, según la terminología de la jurisprudencia de ciertos tribunales constitucionales, como el tribunal alemán o la Corte Constitucional colombiana; y de otro lado, un contenido de desarrollo progresivo, frente al cual la obligación estatal es la de tomar medidas para lograr progresivamente su plena realización; y (iv) la prohibición de retroceso, según la cual, si el deber de los Estados es avanzar progresivamente en la realización de los derechos sociales, entonces las medidas que disminuyen una protección alcanzada en el pasado deben ser consideradas, al menos *prima facie*, como contrarias al PIDESC, por lo que sólo serían válidas si las autoridades pueden justificar su necesidad tomando en consideración el conjunto de los derechos reconocidos por el mismo pacto.

La legislación internacional ha desarrollado obligaciones de orden general y de orden específico, bajo los conceptos de “progresiva efectividad” y “obligaciones de resultado” sobre cuyo cumplimiento el Estado se responsabiliza ante el control ciudadano e institucional y ante la vigilancia de los organismos internacionales. Las posibles limitaciones económicas no eximen al Estado de la adopción de medidas deliberadas y concretas tendientes al disfrute efectivo del derecho. Si bien la realización puede ser paulatina, en términos razonables, la obligación de resultado permanece y en consecuencia la vigilan-

---

44. Óscar Parra (2003). *El derecho a la salud en la Constitución, la jurisprudencia y los instrumentos internacionales*, Defensoría del Pueblo, Bogotá, p. 263.

4. Observación General No. 14, párrafo 12.

cia se concentra en el correcto encauzamiento y priorización de las políticas y programas conducentes al logro de resultados. Son precisamente las políticas y los programas adoptados los que garantizan que el derecho prevalezca frente a otras razones de orden económico o político que puedan debilitar, retardar u obstaculizar su realización.

Precisamente en uno de sus informes más recientes, el Relator Especial en Salud, señor Paul Hunt, abordó los problemas que en materia de derechos humanos suscita la inevitable priorización que debe existir en materia de salud, debido al carácter limitado de los recursos<sup>46</sup>. El Relator reconoce que se trata de un tema difícil, frente al cual aún no hay respuestas consolidadas y que requerirá un trabajo interdisciplinario entre los “especialistas en derechos humanos y los especialistas del ámbito de la salud, incluidos los epidemiológicos y los economistas” (Párr. 19). Sin embargo, el Relator precisa que existen algunos principios básicos que deben ser recordados, como que existen niveles mínimos que deben ser satisfechos y que no deberían admitir priorizaciones, que el proceso debe ser transparente y sustentado, que debe ser participativo, y que debe, por decirlo paradójicamente, priorizar en la priorización, a las poblaciones menos favorecidas (Párrs. 20 y ss.).

La Observación General No. 14, a la que ya hemos hecho referencia, pormenoriza las obligaciones de carácter general y de carácter específico a que se deben los Estados. Sobre ellas aclara que si bien el derecho establece la aplicación progresiva, igualmente impone obligaciones de efecto inmediato, por ejemplo la garantía de la no discriminación y la obligación de adoptar medidas “deliberadas y concretas” destinadas a la plena realización del artículo 12 del Pacto de Derechos Económicos, Sociales y Culturales.

El Estado también tiene obligaciones jurídicas específicas, al igual que en relación con los demás derechos, de respetar, proteger y cumplir. La obligación de respetar es una obligación negativa ya que ordena a las autoridades que no tomen medidas que impidan el goce del derecho a la salud, lo cual exige no denegar ni limitar el acceso igual de todas las personas, incluidos presos, representantes de minorías, etc., es decir, ninguna práctica discriminatoria. La de proteger incluye la adopción de medidas para velar por la igualdad en el acceso a los servicios proporcionados por terceros, velando “por que la privatización del sector no represente una amenaza para la disponibilidad, accesibilidad, aceptabilidad y calidad de los servicios [...] controlar la comercialización de equipo médico y de medicamentos por terceros”. Igualmente es responsabilidad del Estado proteger de posibles prácticas nocivas, tradicionales por ejemplo, que afecten el acceso, por parte de terceros, a la atención anterior y posterior al parto o a la planificación familiar; impedir que la mujer sea sometida a la mutilación de sus órganos o a cualquier acto de violencia desde la perspectiva de género. Finalmente, la obligación de cumplir requiere que los Estados reconozcan suficientemente el derecho en sus sistemas políticos y ordenamientos jurídicos y que adopten una política nacional de salud acompañada de un plan detallado para su ejercicio, instaurando un sistema de seguro de salud pública, privado o mixto asequible a todos. Exige igualmente promover, a través de actividades, el mantenimiento y restablecimiento de la salud de la población.

---

46. Ver su Informe (A/62/214) presentado a la Asamblea General de las Naciones Unidas en 2007. Disponible en Internet en: [[www.unhcr.org/cgi-bin/texis/vtx/refworld/rwmain/opendocpdf.pdf?reldoc=y&docid=473089c92](http://www.unhcr.org/cgi-bin/texis/vtx/refworld/rwmain/opendocpdf.pdf?reldoc=y&docid=473089c92)].

En su Observación General No. 3, el Comité enfatiza la obligación de los Estados partes respecto a los otros Estados, para lo cual deben reconocer el papel fundamental de la cooperación y cumplir con el compromiso de adoptar medidas conjuntas e individuales para dar plena efectividad al derecho. Al respecto se remite a la Declaración de Alma-Ata, que proclama la grave desigualdad existente en la salud, particularmente entre los países desarrollados y aquellos en vía de desarrollo<sup>47</sup>. La obligación se extiende al respeto del disfrute del derecho en otros países a través de acuerdos internacionales, a la elaboración de nuevos instrumentos legales, a la influencia para que organizaciones internacionales, por ejemplo las financieras como el Fondo Monetario Internacional o el Banco Mundial, presten mayor protección al derecho a la salud. Así mismo deben abstenerse de imponer embargos o medidas análogas que restrinjan a otro Estado el suministro de medicamentos o de equipo médico adecuado<sup>48</sup>.

En la Observación General No. 14, teniendo como base la Observación General N° 3, el Comité confirma:

*... que los Estados Partes tienen la obligación fundamental de asegurar como mínimo la satisfacción de niveles esenciales de cada uno de los derechos enunciados en el Pacto, incluida la atención primaria básica de la salud. Considerada conjuntamente con instrumentos más recientes, como el Programa de Acción de la Conferencia Internacional sobre Población y Desarrollo, la Declaración de Alma-Ata ofrece una orientación inequívoca en cuanto a las obligaciones básicas dimanantes del artículo 12. Por consiguiente, el Comité considera que entre esas obligaciones básicas figuran, como mínimo, las siguientes:*

- a) Garantizar el derecho de acceso a los centros, bienes y servicios de salud sobre una base no discriminatoria, en especial por lo que respecta a los grupos vulnerables o marginados;*
- b) asegurar el acceso a una alimentación esencial mínima que sea nutritiva, adecuada y segura y garantice que nadie padezca hambre;*
- c) garantizar el acceso a un hogar, una vivienda y unas condiciones sanitarias básicas, así como a un suministro adecuado de agua limpia potable;*
- d) facilitar medicamentos esenciales, según las definiciones periódicas que figuran en el Programa de Acción sobre Medicamentos Esenciales de la OMS;*
- e) velar por una distribución equitativa de todas las instalaciones, bienes y servicios de salud;*
- f) adoptar y aplicar, sobre la base de las pruebas epidemiológicas, una estrategia y un plan de acción nacionales de salud pública para hacer frente a las preocupaciones en materia de salud de toda la población; la estrategia y el plan de acción deberán ser elaborados, y periódicamente revisados, sobre la base de un proceso participativo y transparente; esa estrategia y ese plan deberán prever métodos, como el derecho a indicadores y bases de referencia de la salud que permitan vigilar estrechamente los*

---

47. Artículo 11 de la Declaración, Conferencia Internacional sobre Atención Primaria de Salud, septiembre de 1978

48. El Comité remite al respecto a la Observación General No. 8, relacionando sanciones económicas por el respeto a derechos económicos, sociales y culturales.

*progresos realizados; el proceso mediante el cual se concibe la estrategia y el plan de acción, así como el contenido de ambos, deberán prestar especial atención a todos los grupos vulnerables o marginados (OG No. 14, Párrafo 43).*

Otra obligación particularmente interesante es la de proporcionar capacitación adecuada al personal del sector salud, que incluya la educación en materia de derechos humanos<sup>49</sup>.

La Observación General No. 14 también desarrolla las conductas violatorias del derecho a partir de cada una de las obligaciones delimitadas. Así, se afirma que “las violaciones del derecho a la salud pueden producirse mediante la acción directa de los Estados o de otras entidades que no estén suficientemente reglamentadas por los Estados”<sup>0</sup> y se presentan por acción o por omisión. Evidentemente, la adopción de cualquier medida regresiva incompatible con las obligaciones básicas constituye una violación por acción, tanto como en caso de la no adopción de medidas necesarias derivadas de las obligaciones adquiridas, se trata de violación por omisión.

La violación a la obligación de *respetar* abarca cualquier acción, política o ley que contravenga el artículo 12 del Pacto, por ejemplo la ocultación o tergiversación deliberada de información, la suspensión de legislación o la promulgación de leyes o adopción de políticas que afecten desfavorablemente el disfrute de cualquiera de los componentes del derecho a la salud. También constituye violación el no tener en cuenta las obligaciones legales al concertar acuerdos con organizaciones internacionales, como pueden ser las empresas multinacionales.

Se viola la obligación de *proteger* al no regular las actividades de los particulares, grupos o empresas que afecten la salud; así como se viola la obligación de *cumplir* si hay asignación insuficiente de recursos o si no se plantea el enfoque de la salud desde la perspectiva de género. No reducir la tasa de mortalidad infantil y materna es igualmente una violación de esta obligación.

La estrategia nacional y los planes de acción de salud deben basarse en la rendición de cuentas y en la transparencia e independencia del poder judicial. Los Estados deben adoptar una “ley marco” que contenga

*... disposiciones sobre los objetivos que deben alcanzarse y los plazos necesarios para ello; los medios que permitan establecer las cotas de referencia del derecho a la salud; la proyectada cooperación con la sociedad civil, incluidos los expertos en salud, el sector privado y las organizaciones internacionales; la responsabilidad institucional por la ejecución de la estrategia y el plan de acción nacional del derecho a la salud* <sup>51</sup>.

49. Observación General No. 14, párrafo 44, lit. e).

0. Observación General No. 14, párrafo 49.

1. Observación General No. 14 párrafo 6.

#### 1.4. Normatividad nacional: breves consideraciones sobre la recepción constitucional del derecho a la salud

Antes de la Constitución de 1991, el derecho a la salud no tenía un claro reconocimiento constitucional, a pesar de los avances indudables que en materia de derechos sociales significaron la reforma constitucional de 1936 y la ratificación del Pacto de Derechos Económicos, Sociales y Culturales<sup>2</sup>. Esta situación cambia con la Constitución de 1991, que señala como fin del Estado el garantizar la efectividad de los principios, derechos y deberes consagrados en la misma (artículo 2), en el marco del Estado Social de Derecho. La Corte Constitucional ha precisado que

*... la connotación de social supera la concepción del Estado de Derecho en que las instituciones y la ley sólo garantizaban formalmente las libertades y los derechos, sin la preocupación mas profunda de hacer realidad el contenido material de los derechos y libertades*<sup>53</sup>.

Esa adopción de la fórmula constitucional del Estado social y democrático de derecho permitió entonces una incorporación vigorosa de los derechos sociales en general y del derecho a la salud en particular.

El artículo 44 consagra la salud como derecho fundamental de los niños, y es claro que éste también se entiende incorporado en la protección de la vejez contenida en el artículo 46. El artículo 48 establece que la seguridad social es un servicio público de carácter obligatorio “que se prestará bajo la dirección, coordinación y control del Estado”, cuyo desarrollo legal debe ajustarse a los principios de eficiencia, solidaridad y universalidad, permitiendo también la participación de los particulares en el sistema de seguridad social. La Corte Constitucional ha entendido el concepto de seguridad social como

*... los medios de protección institucionales para amparar a la persona y a su familia frente a los riesgos que atentan contra la capacidad que éstos tienen para generar los ingresos suficientes para gozar de una existencia digna y enfrentar contingencias como la enfermedad, la invalidez o la vejez. Por ello, la Constitución establece que la seguridad social es no sólo un servicio público de carácter obligatorio, prestado bajo la dirección, coordinación y control del Estado, sino que también representa un derecho irrenunciable, garantizado a todos los habitantes del Estado*<sup>4</sup>.

Por su parte el artículo 49 de la Constitución establece que “la atención de la salud y el saneamiento ambiental son servicios públicos a cargo del Estado”. Más adelante dispone que todas las personas puedan acceder a los servicios de promoción, protección y recuperación de la salud. Esto debe leerse en armonía con los artículos 36 y 366 *ibídem* que establecen que los servicios públicos son inherentes a la finalidad social del Estado y que es deber de éste asegurar su prestación eficiente a todos los habitantes del territorio

---

2. Para una reseña histórica de la regulación constitucional del derecho a la salud en Colombia, ver Mónica Arbeláez Rudas. *El derecho a la salud*... Ob. cit., p. 11 y ss.

3. Sentencia T-406 de 1992, M.P. Ciro Angarita Barón.

4. Sentencia C-674 de 2001, M.P. Eduardo Montealegre Lynett.

nacional, de conformidad con la ley. Más adelante el mismo artículo dispone que “corresponde al Estado organizar, dirigir y reglamentar la prestación de servicios de salud a los habitantes y el saneamiento” y el deber de ejercer la vigilancia y el control de la prestación de los servicios, que puede ser llevada a cabo por particulares. Finalmente el artículo 0 establece el derecho de atención gratuita, en las instituciones que reciben aportes públicos, para todos los menores de un año.

Ahora bien, en virtud del llamado bloque de constitucionalidad, esta recepción del derecho a la salud por la Constitución de 1991 implica también, en cierta medida, la constitucionalización de los estándares internacionales sobre dicho derecho, explicados en los apartes anteriores de este capítulo. En efecto, conforme a dicha figura, los tratados de derechos humanos ratificados por Colombia, y en particular el Pacto de Derechos Económicos, Sociales y Culturales y el Protocolo de San Salvador tienen rango constitucional en el ordenamiento colombiano, por lo cual sus mandatos deben ser tomados en cuenta por las autoridades<sup>6</sup>. A su vez, los criterios desarrollados por el Comité de Derechos Económicos, Sociales y Culturales, como intérprete autorizado del Pacto Internacional de Derechos Económicos, Sociales y Culturales<sup>7</sup>, son criterios relevantes para determinar el contenido y alcance de los derechos sociales (CP art. 93), como el derecho a la salud<sup>8</sup>, por lo que las doctrinas de dicho Comité, explicadas anteriormente en este capítulo, tienen clara relevancia constitucional en Colombia.

Fuera de esa recepción interna de los estándares internacionales de derechos humanos, la Constitución tiene otros desarrollos específicos frente a este derecho, que conviene destacar.

De un lado, la Corte Constitucional ha admitido la protección del derecho a la salud por vía de tutela, con lo cual ha desarrollado su justiciabilidad en forma más intensa que la prevista en otros ordenamientos constitucionales para este tipo de derechos sociales. Este punto simplemente lo mencionamos pues será desarrollado en forma sistemática en el capítulo de este trabajo, en donde analizaremos cómo la tutela se ha convertido en una forma privilegiada para acceder a los servicios médicos.

---

. El aspecto de la responsabilidad en la vigilancia frente a la prestación de los servicios por parte de los particulares es de gran relevancia y ha sido incluso abordado por la Corte Interamericana de Derechos Humanos. En el Caso Ximenes Lopes contra Brasil, relacionado con la muerte de una persona con discapacidad mental mientras permanecía bajo cuidado de una casa de reposo, la Corte precisó que es posible atribuir la responsabilidad internacional estatal por los actos de terceros que prestan servicios públicos y resaltó “... el deber de los Estados de regular y fiscalizar las instituciones que prestan servicio de salud, como medida necesaria para la debida protección de la vida e integridad de las personas bajo su jurisdicción”, deber que “... abarca tanto a las entidades públicas y privadas que prestan servicios públicos de salud, como a aquellas instituciones que se dedican exclusivamente a servicios privados de salud” (párr. 141). Estas consideraciones fueron reiteradas en el Caso Albán Cornejo y otros contra Ecuador relacionado con un caso de la mala praxis médica.

6. Sobre la noción de bloque de constitucionalidad y sus desarrollos, ver Rodrigo Uprimny. *Bloque de constitucionalidad...* cit.7. El Pacto de Derechos Económicos, Sociales y Culturales fue aprobado e incorporado al ordenamiento jurídico interno de Colombia mediante la Ley 74 de 1968.

8. En las sentencias C-406 de 1996, C-21 de 1997, T-68 de 1999, C-010 de 2000, T-1319 de 2001, C-671 de 2002, T-8 de 2003 y T-786 de 2003, entre otras, la Corte Constitucional ha destacado que la jurisprudencia de las instancias internacionales de derechos humanos constituye una pauta relevante para interpretar el alcance de los tratados sobre derechos humanos y, por ende, de los propios derechos constitucionales.

De otro lado, la Corte Constitucional ha también mostrado, a través de su jurisprudencia, otras dimensiones o aspectos del derecho a la salud, en lo cual coincide con la visión del Comité DESC que también ha indicado que se trata de un derecho inclusivo, que comprende desde el derecho al propio cuerpo, que incluye la libertad sexual y eugenésica, hasta el derecho a una atención médica y asistencial adecuada y oportuna<sup>9</sup>. Por ejemplo, la Corte ha desarrollado *in extenso* los problemas asociados a los derechos de los usuarios no sólo de acceso al sistema de salud sino sus derechos en el propio acto médico, es decir, los derechos del paciente frente al personal sanitario. Esto tiene múltiples dimensiones, como el alcance del deber de reserva del médico en materia de datos clínicos<sup>60</sup> o el derecho del paciente a aceptar o no un tratamiento médico, que se encuentra vinculado al llamado consentimiento informado<sup>61</sup>. También la Corte ha abordado los vínculos entre el derecho a la salud y el reconocimiento constitucional del pluralismo y de algunas formas de multiculturalidad, lo cual plantea el problema de cómo armonizar la facultad del Estado de regular las profesiones médicas para controlar riesgos sociales, y la existencia de concepciones diversas de salud asociadas a distintas comunidades étnicas y culturales<sup>62</sup>.

### 1.5. La imperatividad del derecho a la salud y la flexibilidad en la configuración del sistema de salud

El estudio realizado en los puntos precedentes muestra que el derecho a la salud, tanto en su dimensión internacional como en su incorporación constitucional, impone al Estado colombiano una serie de obligaciones, que pretenden que progresivamente se logre la plena realización de este derecho. Esto significa que las autoridades no pueden adoptar cualquier política o sistema de salud ya que deben respetar ciertos estándares básicos, tanto constitucionales como internacionales. Por consiguiente, es deber del Estado adoptar un sistema de salud que respete dichos estándares.

Sin embargo, eso no significa que el Estado colombiano en general y el Congreso en particular deban adoptar una política de salud o un sistema de salud concreto y determinado, pues, como ha sido destacado tanto por la doctrina constitucional como por la doctrina en derechos humanos, ni los pactos ni las Constituciones suelen imponer una política o un esquema institucional determinados para que los Estados cumplan

---

9. Sobre las distintas dimensiones del derecho a la salud en la jurisprudencia constitucional colombiana, ver Mónica Arbeláez Rudas. Ob. cit., pp. 1666 y ss. Ver igualmente Rodrigo Uprimny (2002). El derecho a la salud en la jurisprudencia constitucional colombiana" en Saúl Franco (ed.) *La salud pública hoy. Enfoques y dilemas contemporáneos en salud pública*. Universidad Nacional, Bogotá.

60. Este punto fue abordado por la Corte Constitucional en sentencia C-264 de 1996, M.P. Eduardo Cifuentes Muñoz, en la cual se determinan el alcance y los límites del secreto profesional médico.

61. Ver por ejemplo, Corte Constitucional, Sentencia T-401 de 1994, M.P. Eduardo Cifuentes Muñoz.

62. La Corte Constitucional, al determinar que las disposiciones legislativas especiales, dirigidas a comunidades indígenas no eran en sí mismas inconstitucionales, expresó que "estas normas, en tanto que implican una distinción, deben basarse en razones suficientes que expliquen la diferencia de trato. En materia de salud, existen elementos culturales (como la concepción de la enfermedad y su tratamiento) y socioeconómicos (como la existencia de una economía colectiva por oposición al mercado), que de no considerarse en su justa dimensión, hacen más difícil el acceso y disfrute efectivo de los beneficios del sistema de seguridad social en salud. En tales condiciones, resulta justificado que, en términos generales, se establezca un régimen especial de seguridad social en salud para tales comunidades" Corte Constitucional C-088 de 2001, M.P. Martha Victoria Sánchez. Objeciones presidenciales al Proyecto de Ley 67/99 Senado - 193/99 Cámara, "mediante el cual se reglamenta la participación de los pueblos indígenas en el sistema general de seguridad social en salud".

con estas obligaciones. Los Estados, y en especial las autoridades de origen democrático, como los Congresos y los gobiernos, gozan de una cierta libertad de configuración, según la conocida terminología constitucional, para adoptar una política determinada para realizar un derecho humano, obviamente dentro de los límites impuestos por la normatividad internacional y constitucional. Es muy raro que las Constituciones impongan una estrategia determinada para la realización de los derechos constitucionales pues una Constitución totalmente cerrada, que impusiera un modelo económico y social muy estricto, sería incompatible con la alternancia democrática<sup>63</sup>. Por ello ha dicho al respecto la Corte Constitucional que la Carta “ha reconocido al legislador un amplio margen de configuración para regular todo lo concerniente a la seguridad social y, en concreto, lo relacionado con sus prestaciones en salud, vejez, riesgos profesionales, etc”<sup>64</sup> pues la definición del “contenido de los derechos prestacionales es una tarea que compete al legislador y que es realizada en virtud de consideraciones jurídicas, políticas y presupuestales, que, en principio, escapan al control de constitucionalidad”<sup>65</sup>. Por su parte, la doctrina internacional de derechos humanos ha precisado que “el Derecho Internacional de los Derechos Humanos no contiene en sí un determinado diseño de políticas, sino estándares que sirven de marco a las políticas que cada Estado define”<sup>66</sup>.

Esto significa que el legislador goza de amplia libertad para definir la forma como se prestará la seguridad social y la salud. Sin embargo, existen unos mínimos que debe satisfacer un sistema de salud o una política de salud para adecuarse a los estándares de derechos constitucionales y de derechos humanos. Esos mínimos corresponden obviamente a las obligaciones del Estado en este campo y a los contenidos del derecho a la salud, que explicamos en los puntos precedentes y que han sido explicados por distintas instancias internacionales, como el Comité DESC o el Relator del derecho a la salud, o por la propia jurisprudencia constitucional.

En algunos documentos recientes, el Relator Especial de Naciones Unidas sobre el derecho a la salud, el señor Paul Hunt, ha intentado sistematizar algunos de esos elementos básicos que debe reunir un sistema de salud para ser compatible con los estándares internacionales<sup>67</sup>. Sin que pretendamos sintetizar sus reflexiones, que el propio relator reconoce como parciales y preliminares, conviene destacar algunos elementos importantes de su enfoque, pues pueden ser útiles para la discusión colombiana.

63. Sobre la distinción entre constituciones normativas, que establecen pautas y estándares que las autoridades deben cumplir pero que no predeterminan la integralidad de las políticas públicas; y constituciones cerradas, que imponen modelos económicos estrictos, ver Rodrigo Uprimny y Cesar Rodríguez (2007) “Constitución, modelo económico y políticas públicas en Colombia” en Luis Eduardo Pérez, Cesar Rodríguez y Rodrigo Uprimny. *Los derechos sociales en serio: hacia un diálogo entre derechos y políticas públicas*. Bogotá, DeJuSticia.

64. Sentencia C-623 de 2004, M.P. Rodrigo Escobar Gil.

65. Sentencia C-613 de 1996, M.P. Eduardo Cifuentes Muñoz. Este criterio ha sido retomado en numerosas sentencias. Ver por ejemplo, entre muchas otras, las C-42 de 1998, M.P. Hernando Herrera Vergara, C-1489 de 2000, M.P. Alejandro Martí - nez Caballero, C-107 de 2002, M.P. Clara Inés Vargas Hernández, C-671 de 2002, M.P. Eduardo Montealegre Lynnet; C-14 de 2004, M.P. Jaime Córdoba Triviño; C-623 de 2004, M.P. Rodrigo Escobar Gil; y C-1032 de 2006, M.P. Nilson Pinilla.

66. Victor Abramovich. *Los estándares interamericanos...* cit., p. 236.

67. Ver en particular los siguientes dos documentos: su Informe al Consejo de Derechos Humanos de 2008 (Consejo de Derechos Humanos. A/HRC/7/11, 31 de enero de 2008, versión editada) y su Informe a la Asamblea General de 2007 (A/62/214).

En primer término, si el derecho a la salud no se reduce al derecho a acceder a la atención médica sino que es más amplio e integral, pues consiste en el derecho a gozar del más alto nivel posible de salud física, mental y psíquica, entonces los sistemas y las políticas de salud no pueden limitarse a atender la enfermedad, pues deben también tratar los factores subyacentes determinantes de la salud. Esto muestra entonces la importancia de las políticas de salud pública en la realización del derecho a la salud.

En segundo término, un sistema de salud debe, en su diseño y funcionamiento, respetar ciertos principios básicos comunes a los derechos humanos, como el deber de transparencia, la participación, la rendición de cuentas, el respeto a las diferencias culturales y a los principios de igualdad y no discriminación. Es por ello esencial que el sistema adopte estrategias que favorezcan especialmente a las poblaciones vulnerables y discriminadas.

En tercer término, y precisamente para lograr una adecuada rendición de cuentas y el respeto a los principios de igualdad y no discriminación, un sistema de salud acorde con los derechos humanos debería desarrollar un sistema de información, de indicadores y metas, que permita evaluar con claridad los avances y retrocesos en la satisfacción del derecho a la salud. Esta información debe ser desagregada, hasta donde sea posible, por categorías adecuadas, como género, situación social y geográfica, pertenencia étnica, etc, a fin de evaluar el impacto diferenciado del sistema de salud sobre las poblaciones vulnerables y discriminadas.

En cuarto término, el Estado debe promover sistemas de financiación adecuados y equitativos, que canalicen los recursos necesarios para lograr una satisfacción progresiva, pero cada vez más plena e integral, del derecho a la salud.

Finalmente, un sistema de salud debe inmediatamente cumplir con los contenidos básicos directamente exigibles por el derecho a la salud, y que ya fueron sistematizados por el Comité DESC en la citada Observación General No. 14, a saber, (i) la adopción y aplicación de una estrategia y un plan de acción nacionales de salud pública sobre la base de las pruebas epidemiológicas, (ii) el aseguramiento del acceso a los centros, bienes y servicios de salud sobre una base no discriminatoria, en especial en lo que respecta a los grupos vulnerables o marginados; (iii) la distribución equitativa de todas las instalaciones, bienes y servicios de salud; y (iv) el suministro de los medicamentos esenciales.

Es pues dentro de esos marcos normativos imperativos donde el Estado colombiano puede adoptar políticas y estrategias de salud diversas.

## CAPÍTULO 2

### La política pública: el sistema de salud adoptado por la Ley 100 de 1993 y sus resultados en el goce del derecho a la salud

El análisis realizado en el capítulo anterior muestra que el derecho a la salud, tanto en los tratados de derechos humanos como en la Constitución, impone al Estado colombiano una serie de obligaciones, destinadas a lograr la plena realización de ese derecho. Sin embargo, tal como también se explicó en ese capítulo, los Estados, y en particular el Legislador y el Gobierno, tienen una cierta libertad para adoptar un esquema institucional y una determinada política para satisfacer los derechos sociales en general, y el derecho a la salud en particular. En ese contexto, en Colombia fue adoptada la Ley 100 de 1993, que implicó un cambio profundo del sistema de salud. El propósito de este capítulo es presentar, en forma breve pues en la literatura académica ya existen estudios sistemáticos sobre el tema, las motivaciones que dieron lugar a esa reforma y las principales orientaciones de la misma<sup>68</sup>, así como realizar una primera valoración de su adecuación a los estándares normativos derivados del derecho a la salud. Para ello comenzaremos por recordar el contexto ideológico de esa reforma, para luego presentar sus principales diseños institucionales. Esa exposición será bastante sintética y abstracta, pues nuestra finalidad esencial es presentar la lógica que preside el sistema de salud puesto en marcha por la Ley 100 de 1993 y examinar su compatibilidad con el marco constitucional y de derechos

---

68. Para presentaciones de ese cambio, ver, para una defensa del mismo: Juan Luis Londoño y Julio Frenk (1997). *Pluralismo estructurado...* cit. Ver igualmente el trabajo de Yves LeBonniec en la investigación del CID. Ver también Mary Jazmín Campos y otros (2002). "Salud para todos" en Luis Jorge Garay (dir.) *Colombia, entre la exclusión y el desarrollo. Propuestas para la transición al Estado social de Derecho*. Contraloría General de la República en coedición con Alfaomega, Bogotá. Igualmente ver Adriana Rodríguez y Carlos Ramírez (200). "La garantía de la salud como derecho integral" en Luis Jorge Garay y Adriana Rodríguez (dirs.) *Colombia, diálogo pendiente*, Bogotá, Planeta Paz, Ver también Iván Jaramillo (1999). *El futuro de la salud en Colombia. Ley 100 de 1993: cinco años después*. Bogotá, FESCOL, Introducción y Capítulo VI. Igualmente Beatriz Plaza y Ana Beatriz Barona (1999). *Afiliación de población pobre al sistema de salud: el caso colombiano*. Bogotá, Fedesarrollo, 1999. O también Restrepo M. (1997). *La reforma a la seguridad social en salud de Colombia y la teoría de la competencia regulada*. Santiago de Chile, Naciones Unidas, CEPAL, GTZ. Ver igualmente Mario Hernández Álvarez (2002). "El debate sobre la Ley 100 de 1993: antes, durante y después" en Saúl Franco (ed.) *La salud pública hoy: enfoques y dilemas contemporáneos en salud pública*. Bogotá. Para los debates en el Congreso, ver sobre todo la ponencia para primer debate en el Senado, en: *Gaceta del Congreso*, año II, No. 130, 14 de mayo de 1993, p. 6 y ss. Para una presentación de esas reformas en el ámbito latinoamericano y sus resultados después de algunos años, ver Daniel Titelman, Andras Uthoff y Luis Felipe Jiménez (2000). "Hacia una nueva seguridad social en el siglo XXI: sin solidaridad en el financiamiento no habrá universalidad" *en Revista Panamericana de Salud Pública*, Vol. 8, Nos. 1-2

humanos, pero sin analizar en detalle sus diversos componentes e instituciones, lo cual es desarrollado, en una perspectiva sistémica, en la segunda parte de este informe.

## 2.1. El contexto ideológico de la reforma en salud

Durante los años noventa se vivió en América Latina una reorientación del significado de la política social, que pretendía superar, según sus promotores, las deficiencias que se habían constatado en los resultados de las políticas sociales en los Estados desarrollistas, frente a las cuales se argüía fundamentalmente la ineficiencia en la prestación de los servicios y los problemas de distorsión en el acceso, por cuanto éstos en muchos casos no llegaban realmente a los más pobres.

La crítica a estos enfoques de la política social fue articulada al llamado “Consenso de Washington”, expresión equívoca pero necesaria<sup>69</sup> para referirse a los procesos de ajuste del Estado latinoamericano en ese período. Estos reformadores consideraban que a pesar del discurso universalista en materia de política social que se había desarrollado anteriormente, los resultados efectivos de esas políticas eran cuestionables, pues habían conducido a lo que algunos autores han denominado sugestivamente como una combinación de “falso universalismo” y “universalismo ineficaz”<sup>70</sup>, en la medida en que se verificaron en dichas políticas sociales sesgos corporativistas, cuando éstas no eran francamente excluyentes. En efecto, en la práctica, en los Estados desarrollistas la retórica de la política social universal escondía un suministro de bienes y servicios segmentados y de distinta calidad, de tal manera que sólo accedían a servicios estatales de calidad aquellos grupos que tenían fuerza corporativa suficiente para reclamarlos políticamente, que eran esencialmente las clases medias o los sectores sindicalizados del Estado. El “universalismo” era entonces falso. O, en otros casos, como ocurría con la educación básica, algunos Estados latinoamericanos avanzaron considerablemente en el logro de una verdadera universalización, pero en detrimento de la calidad. El “universalismo” era entonces ineficaz.

Los reformadores asociados al Consenso de Washington recurrieron entonces a estrategias que implicaban un recorte importante de las responsabilidades del Estado en la materia, y que se tradujeron en formas de (i) descentralización de la política social; (ii) focalización de los servicios, con preferencia por los subsidios a la demanda; (iii) mercantilización, para introducir la competencia y eliminar el monopolio que tenía la mayoría de los Estados latinoamericanos sobre ciertos servicios sociales; y (iv) el desarrollo de los servicios sociales con base preferentemente en proyectos puntuales que competían por recursos públicos y no en políticas de largo plazo formuladas directamente por el Estado.

---

69. Para una presentación de los desarrollos y posibles equívocos de la expresión “Consenso de Washington” por parte de quien es considerado uno de sus principales inspiradores, ver John Williamson “Our Agenda and the Washington Consensus” en Pedro Pablo Kuczynski y John Williamson (eds.) (2003). *After the Washington Consensus. Restarting Growth and Reform in Latin America*, Washington, Institute for International Economics, p. 323 y ss.

70. Fernando Filgueira, Carlos Gerardo Molina, Jorge Papadópulos y Federico Tobar. “Universalismo básico: una alternativa posible y necesaria para mejorar las condiciones de vida” en Carlos Gerardo Molina (ed.) (2006). *Universalismo básico: una nueva política social para América Latina*, Washington DC, BID, Planeta, p. 46 y ss.

Esa reorientación de la política social en las décadas de los 1980 y 1990 pretendía superar las deficiencias que se habían constatado en los resultados de las políticas sociales en los Estados desarrollistas, y que eran esencialmente las siguientes: (i) su ineficiencia, que se traducía en un elevado costo fiscal; y (ii) su distorsión, pues realmente los servicios sociales estatales no llegaban a los más pobres. Por ello se planteaban las estrategias anteriores para introducir criterios de eficiencia (gracias a los mecanismos de mercado, a la descentralización y a la competencia por recursos de los distintos proyectos) y de focalización (a fin de que los recursos públicos llegaran a los que más los necesitaban).

Para el caso de los servicios de salud, tanto las críticas como las alternativas también fueron planteadas, justamente tras la constatación de la coexistencia en la región “de diversos modelos de organización para el funcionamiento y prestación de los servicios de salud, todos los cuales tienen serios obstáculos para su desempeño óptimo”<sup>71</sup>, entre los cuales se destacó con fuerza el esquema de subsidios a la oferta y las limitaciones propias de este modelo aplicado a la prestación de servicios de salud, bajo un preponderante protagonismo estatal. Por eso mismo, la reforma se propuso la instauración progresiva de un esquema de subsidios a la demanda y aseguramiento, acompañada de la incorporación de mecanismos de mercado dirigidos a contrarrestar los “extremos del monopolio en el sector público y la atomización en el sector privado”<sup>72</sup> propia de algunos de los modelos existentes, y se permitía la participación directa de los particulares en la prestación de los servicios. Sin embargo, esas perspectivas no defendían una privatización pura y simple, pues reconocían que el mercado de la salud presenta grandes asimetrías<sup>73</sup> y por lo tanto debía ser en todo caso un mercado fuertemente regulado, precisamente porque éste sería el mecanismo para compensar las imperfecciones y “garantizar el establecimiento de incentivos que generen condiciones para la eficiencia y la equidad”<sup>74</sup>.

Así, se concibe en Colombia la fórmula denominada por sus creadores como “pluralismo estructurado”, que se forja como la llamada a superar los problemas evidenciados, y en la cual la población resulta integrada horizontalmente, gracias a la universalización soportada en el financiamiento público de una parte de los servicios de salud. Adicionalmente, según esta visión, el sistema de salud no debe ser entendido como una serie de organizaciones aisladas que prestan los servicios, sino como un verdadero conjunto de organismos que cumplen las funciones especializadas de financiación<sup>7</sup>, prestación<sup>76</sup>,

71. Juan Luis Londoño y Julio Frenk (1997). “Pluralismo estructurado...” Ob. cit.

72. Ídem.

73. En materia de salud se habla de la asimetría entre médico y paciente, porque el conocimiento que este último tiene frente a los medicamentos y procedimientos es muy débil frente a la información en poder del médico.

74. Adriana Rodríguez Castillo y Carlos Ramírez Chávez (200). “La garantía de la salud como derecho integral” en *Colombia, diálogo pendiente*, Planeta Paz, Bogotá, p.10.

7. La financiación se define como “la movilización de dinero de fuentes primarias (hogares y empresas) y de fuentes secundarias (el Gobierno en todos los niveles y los organismos internacionales), y a su acumulación en fondos reales o virtuales (por ejemplo, fondos para el aseguramiento público, presupuestos públicos para la atención a la salud, ahorros familiares), que pueden entonces ser asignados a través de diversos arreglos institucionales para la producción de servicios”. Juan Luis Londoño y Julio Frenk (1997). Ob. cit., p. 8

76. La prestación se refiere “a la combinación de insumos dentro de un proceso de producción, la cual ocurre en una estructura organizacional particular y conduce a una serie de productos...” Juan Luis Londoño y Julio Frenk (1997). Ob. cit.

modulación<sup>77</sup> y articulación<sup>78</sup> de manera coordinada, y que por lo tanto adquieren el carácter de sistema. En este diseño lo novedoso está en el énfasis que se otorga a las dos últimas funciones, pues los creadores del modelo eran conscientes de que el mercado de la salud reviste una serie de complejidades y por lo mismo era necesaria una regulación fuerte, entendida como la intervención del Estado allí donde el mercado falla.

La base de esas reformas fue entonces la voluntad de combatir dos defectos que los legisladores vieron en el régimen precedente, a saber, la inequidad y la ineficacia en la prestación de los servicios de salud subsidiada. Antes de la Ley 100 de 1993, las políticas de subsidio se basaban, en lo esencial, en la financiación directa de los hospitales y centros de salud, que es lo que usualmente se conoce como subsidio a la oferta. Algunas encuestas y análisis empíricos habían mostrado que esos subsidios a la oferta eran inequitativos pues no llegaban a la población que más los necesitaba, ya que el sistema nacional de salud, financiado con recursos públicos, terminaba prestando a los sectores sociales más pudientes, que no deberían recibir subsidios, la mayor parte de las consultas externas, odontológicas, de la atención de las maternidades, de las cirugías y de las hospitalizaciones, mientras que los sectores más pobres accedían mucho menos a esos servicios<sup>79</sup>.

A su vez, según los reformadores, el funcionamiento de esos hospitales, directamente financiados por subsidios a la oferta, no eran eficientes, por cuanto esa asignación de recursos no genera incentivos para que las autoridades hospitalarias administren los dineros con economía, ya que cada hospital solía recibir las partidas sin consideración al volumen y a la calidad de los servicios prestados. Es más, en la visión de quienes defendieron las reformas que conllevaba la Ley 100 de 1993, este sistema de subsidios a la oferta terminaba premian-do la ineficiencia y castigando la buena gerencia, puesto que los hospitales en déficit y crisis podían presionar políticamente para obtener financiaciones suplementarias, mientras que las instituciones en superávit veían sus presupuestos recortados<sup>80</sup>.

Por eso se consideraba que la introducción de subsidios a la demanda y de mecanismos de mercado y de competencia, acompañados de un aseguramiento de la población y de la focalización de los subsidios y de una regulación y vigilancia y control estatal adecuados, serían capaces de corregir esas inequidades e ineficiencias.

Esta concepción inspiró la reforma al sistema de salud colombiano operada en 1993 a través de la expedición de la Ley 100, que se inscribe en el paradigma de las reformas de política social que se vivieron durante la década de los 1990 en el resto de América Latina y cuyo diseño institucional refleja las premisas orientadoras del nuevo modelo concebido.

---

77. La función de modulación se concibe como un concepto más amplio que la regulación e “implica establecer, implantar y monitorear las reglas del juego para el sistema de salud, así como imprimir en el mismo una dirección estratégica.” Juan Luis Londoño y Julio Frenk (1997). Ob. cit.

78. La articulación corresponde a la organización y gerencia del consumo en la atención y “abarca también las funciones de agregación de demanda y representación de consumidores que se asignan a lo que se conoce como el ‘patrocinador’ en los modelos de competencia administrada” Enthoven, A. (1988). *Theory and Practice of Managed Competition in Health Care Finance*. Amsterdam, North Holland; y Starr, P. (1994). *The Logic of Health Care Reform*. Nueva York, Estados Unidos: Whittle Books. Citados en: Juan Luis Londoño y Julio Frenk (1997). Ob. cit.

79. Ver Iván Jaramillo. Ob. cit., p. 272 y ss. Ver también Carlos G. Molina et al. (1993). *Gasto público y distribución de subsidios en Colombia*. Bogotá, Fedesarrollo, DNP.

80. Ver, para la defensa de esas perspectivas, Iván Jaramillo. Ob. cit., p. 273 y ss.

Ahora bien, como lo han precisado varios analistas, el predominio de esta visión no surgió simplemente de unas consideraciones técnicas sino que resultó de confrontaciones entre diversas perspectivas, en donde finalmente triunfó la concepción de “pluralismo estructurado”, asociada a la corriente del presidente Gaviria en ese período. Un analista se refiere al debate que conduciría a la Ley 100 de 1993, en los siguientes términos:

*Muchos actores sociopolíticos hicieron propuestas muy concretas. Las centrales obreras, los partidos políticos, los nuevos movimientos sociales, los empresarios, los médicos, los aseguradores de la salud, entre otros, participaron en el debate. Sin entrar en detalles, puede decirse que hubo posiciones francamente socialdemócratas, otras abiertamente liberales o de libre mercado, y otras más universalistas, por la vía de un servicio único de financiamiento público. También se presentó un momento de concertación, el pacto de Hatogrande, la fnca de recreo del Presidente de la República, en el que los mecanismos de regulación de mercado y de focalización por la vía del subsidio a la demanda, que proponía el grupo de técnicos de la corriente gavirista, estaban más desarrollados <sup>81</sup>.*

## 2.2. El diseño institucional y los principios orientadores de la reforma

La Ley 100 de 1993, que desarrolla el mandato constitucional en relación con el desarrollo legislativo para el funcionamiento del servicio de seguridad social en general y la garantía del derecho a la salud en particular, tuvo origen en los debates que culminaron con la expedición de la Constitución Política de 1991. En la Comisión Constitucional de Seguridad Social, Subcomisión de Salud, surgieron elementos, como la separación entre la administración y la prestación del servicio, y la participación del sector privado en ella, que luego quedaron incluidos en la Carta y posteriormente en la Ley 100.

La creación y conformación del Sistema General de Seguridad Social (SGSS) <sup>82</sup> en las primeras discusiones de la reforma en el Congreso <sup>83</sup> estuvieron claramente imbuidas por las concepciones antes explicadas y así quedó después reflejado en la estructura adoptada, que se fundamenta en una estrategia de aseguramiento de las familias frente al riesgo de enfermedad, un sistema mixto de prestación y la incorporación de mecanismos de mercado bajo una competencia regulada. De esta manera, el pluralismo estructurado evitaría la segregación de las poblaciones, pues estarían en constante movilidad entre las diversas funciones, y la universalidad se lograría, no a través de subsidios a la oferta, sino de intervenciones focalizadas a través de un paquete ajustado a las condiciones costo-efectividad, al cual todas las personas tendrían acceso.

Los objetivos definidos en la ley en relación con el servicio público de salud se expresan como la creación de las condiciones de acceso de toda la población al servicio en todos los niveles de atención.

81. Mario Hernández. Ob. cit., p. 470.

82. Conformado por el Sistema de Salud, de Pensiones y de Riesgos Profesionales que también fueron reglamentados por la Ley 100 de 1993. No obstante, acá sólo se hará referencia al Sistema de Seguridad Social en Salud.

83. Ver Proyecto de Ley 248/92.

El sistema se estructura a partir de la definición y especialización de las cuatro funciones básicas de todos los sistemas de salud antes mencionadas, pero reconceptualizadas y adaptadas a la institucionalidad colombiana. Es posible entonces diferenciar en primer lugar la función de dirección, vigilancia y control que es encargada al Ministerio de Protección Social, que tiene a su cargo la formulación de las políticas, la creación de las normas y la integración de los actores. Este Ministerio ejerce entonces lo que en el planteamiento teórico se diseñó como “la modulación para garantizar la dirección estratégica del sistema”.<sup>84</sup> En este orden de ideas la regulación fue concebida como un objetivo expreso en la Ley 100 en el artículo 12.

La función de articulación, que es redefinida en términos de administración, es desarrollada por las Empresas Promotoras de Salud (EPS), que pueden ser de naturaleza pública, privada o mixta y están encargadas de los dos regímenes establecidos para la afiliación. De un lado, el *régimen contributivo* para las personas con capacidad de pago, del cual forman parte los trabajadores con contrato laboral formal, los servidores públicos, los pensionados y los independientes con capacidad de pago. En este régimen hay un sistema de recaudo según el cual el 12,% del salario de cada trabajador debe ser destinado a salud<sup>85</sup>. Este pago es asumido en dos terceras partes por el empleador y en una tercera parte por el empleado<sup>86</sup>. El recaudo lo efectúan las empresas promotoras de salud, que a su vez contratan con las instituciones prestadoras de salud (IPS) la atención de sus afiliados de acuerdo con un paquete preestablecido de servicios denominado Plan Obligatorio de Salud (POS)<sup>87</sup>.

De otro lado, se estableció el *régimen subsidiado*, diseñado para garantizar la afiliación de las personas que no tienen capacidad de pago y que se financia con recursos fiscales y de solidaridad<sup>88</sup>. Para la elección de los beneficiarios del régimen subsidiado se utilizan las clasificaciones de los niveles 1 y 2 del Sistema de Selección de Beneficiarios para Programas Sociales (SISBEN). La administración del régimen subsidiado corresponde a las direcciones locales, distritales o departamentales de salud, las cuales suscriben contratos de administración del subsidio con las empresas promotoras de salud de este régimen<sup>89</sup>, que son las encargadas de la afiliación de los beneficiarios y que prestan directa o indirectamente a través de las IPS los servicios definidos en el Plan Obligatorio de Salud Subsidiado (POS-S), que es de menor cobertura que el del régimen contributivo.

---

84. Campos et al, 2004. Citado en Adriana Rodríguez. Ob. cit., p. 109.

85. Hasta el año 2007 el monto de la cotización era del 12% pero el artículo 10 de la Ley 1122 de 2007 lo subió a 12,%.

86. A partir de 2007 la distribución es de 8,% para el empleador y 4% para el trabajador. En el caso de los independientes la totalidad del aporte, es decir el 12,% , corre por su cuenta.

87. La Ley 100 de 1993 contempla en total seis planes de atención:

- El plan de atención básica en salud (PAB)
- El plan de atención en accidentes de trabajo y enfermedad profesional (ATEP)
- El plan de atención en accidentes de tránsito y eventos catastróficos
- El Plan Obligatorio de Salud (POS)
- El Plan Obligatorio de Salud - Subsidiado (POS-S).
- Los planes de atención complementaria en salud.

88. La solidaridad opera a través del 1,% de la contribución de los afiliados al régimen contributivo, regímenes especiales y de excepción, que es destinada para el régimen subsidiado (artículo 11.2, lit.a de la Ley 1122 de 2007), así como los aportes de las cajas de compensación familiar de que trata el artículo 217 de la Ley 100 de 1993.

89. Originalmente la Ley 100 las denominaba Administradoras del Régimen Subsidiado (ARS), pero a partir de la Ley 1122 de 2007 tanto para el régimen subsidiado como para el contributivo se denominan Empresas Promotoras de Salud. Igualmente es pertinente señalar que algunas de estas entidades prestan sus servicios en ambos regímenes simultáneamente.

Otro aspecto destacable es que la cobertura en los regímenes es familiar, por lo cual las personas que componen el núcleo familiar del afiliado tienen la calidad de beneficiarios de los servicios. De acuerdo con el artículo 163 de la Ley 100 de 1993 pueden ser beneficiarios el cónyuge o el compañero o compañera permanente del afiliado, los hijos menores de 18 años que dependan económicamente de alguno de los cónyuges o compañeros, los hijos mayores de 18 años con incapacidad permanente o aquellos que tengan menos de 2 años, sean estudiantes con dedicación exclusiva y dependan económicamente del afiliado. A falta de cónyuge, compañero o compañera permanente, e hijos con derecho, la cobertura familiar podrá extenderse a los padres del afiliado no pensionados que dependan económicamente de éste. Así mismo, la jurisprudencia ha establecido que la cobertura también se aplica a las parejas del mismo sexo<sup>90</sup>.

Las personas que no tienen capacidad de pago y no han podido entrar en ninguno de los dos regímenes se denominan los participantes “vinculados” y deben ser atendidos por la red pública mediante subsidios a la oferta. La existencia de este tipo de participantes se concebía con carácter temporal, pues se esperaba que el sistema garantizara cobertura universal luego de sus primeros años de puesta en marcha, pese a lo cual, a la fecha, aún hay un amplio porcentaje de la población que no ha logrado la afiliación y por lo mismo los participantes vinculados siguen siendo un número bastante elevado dentro del sistema<sup>91</sup>.

Por último cabe destacar que coexisten con los dos regímenes enunciados, los regímenes especiales o excepcionales, que tienen aplicación para los servidores y pensionados de Ecopetrol, los miembros de las Fuerzas Militares y la Policía Nacional; el personal civil que presta sus servicios en el Ministerio de Defensa, la Policía Nacional y en la Justicia Penal Militar y su Ministerio Público<sup>92</sup>, los afiliados al Fondo Nacional de Prestaciones Sociales del Magisterio creado por la Ley 91 de 1989, los trabajadores de las empresas que al empezar a regir la Ley 100 de 1993 estuvieran en concordato preventivo y obligatorio en el cual se hubieran pactado sistemas o procedimientos especiales de protección de las pensiones, el Presidente de la República y los miembros no remunerados de corporaciones públicas. Así mismo, las universidades públicas tienen la posibilidad de organizar su seguridad social en salud por fuera de los dos regímenes generales<sup>93</sup>.

La tercera función especializada es la de prestación de los servicios de salud, que puede ser cumplida directamente por las EPS o éstas pueden contratar con las IPS, que también pueden ser de naturaleza privada o pública. No obstante, el nuevo modelo ordena la conversión de los hospitales públicos en Empresas Sociales del Estado (ESE) regidas por el régimen de contratación del derecho privado, que deben empezar a funcionar como em-

---

90. Ver sentencia C-811 de 2007, M.P. Marco Gerardo Monroy Cabra.

91. Para el año 2003, a diez años de aprobación de la Ley, la afiliación se ubicaba en un 62% de la población nacional, por lo que a pesar del aumento en el aseguramiento con relación a los años 1990, aún cerca del 38% de la población continúa por fuera del sistema. Ver Adriana Rodríguez et al. (2000). “La garantía de la salud como derecho integral” en *Colombia, Diálogo pendiente*, Planeta Paz, Bogotá, p. 110.

92. De conformidad con el Decreto 1214 de 1990.

93. Así lo permite el inciso 3 del artículo 7 de la Ley 30 de 1992, modificado por el artículo 1 de la Ley 647 de 2001 que establece: “el carácter especial del régimen de las universidades estatales u oficiales comprenderá la organización y elección de directivas, del personal docente y administrativo, el sistema de las universidades estatales u oficiales, el régimen financiero, el régimen de contratación y control fiscal y su propia seguridad social en salud, de acuerdo con la presente ley”. (las cursivas están fuera del original).

presas autosostenibles financiera y administrativamente, porque se acaba la asignación de presupuestos públicos para éstas, y deben vender servicios y competir con las otras IPS.

La financiación del sistema se maneja a través del Fondo de Solidaridad y Garantía (FOSYGA) que es un mecanismo creado para la administración de los recursos del sistema. El fondo está a su vez conformado por cuatro subcuentas independientes: i) la de compensación entre los recursos recibidos por las EPS por las cotizaciones y el pago por la prestación de servicios a los afiliados del régimen contributivo; ii) la de solidaridad que permite la financiación de los servicios del régimen subsidiado y las personas sin capacidad de pago; iii) la de promoción de la salud; y iv) la de eventos catastróficos, terroristas y accidentes de tránsito, que se financia con recursos fiscales y con el Seguro Obligatorio de Accidentes de Tránsito (SOAT). Cada subcuenta tiene como función la financiación y compensación entre entidades del respectivo régimen o actividad. Las EPS son las encargadas de recaudar las cotizaciones de los afiliados del contributivo, de las cuales se deben descontar el valor de las Unidades de Pago por Capitación (UPC), los costos de las incapacidades, las licencias de maternidad y de actividad de promoción.

Como se ve, en este esquema, desempeña un papel esencial la introducción de las EPS, como intermediarias de los regímenes subsidiado y contributivo, ya que por medio de ellas la Ley 100 pretendía combatir la ineficacia e inequidad del anterior sistema de salud. La lógica es la siguiente: el subsidio a la demanda y el aseguramiento permiten que el usuario escoja entre las distintas instituciones de prestación de servicios de salud y esa libertad de selección premia a aquellas entidades que prestan servicios de mejor calidad. De otro lado, una buena focalización de los subsidios permitiría generalizar rápidamente el aseguramiento. Además, la introducción de planes únicos de salud, (el POS en el contributivo y el POS-S en el subsidiado), financiados con las UPC debería evitar que la introducción de ciertos mecanismos de competencia, en la prestación de los servicios de salud, pueda traducirse en una inequitativa segmentación del servicio de la salud. En efecto, para cubrir los costos de los servicios que ofrece el sistema a sus usuarios, la ley diseñó la Unidad de Pago por Capitación –UPC– (UPC para el régimen contributivo y UPC-S para el subsidiado), como valor fijo mediante el cual se unifican los costos del paquete básico de los servicios en salud (Plan Obligatorio de Salud –POS para el contributivo y POS-S para el subsidiado–) que ofrece el sistema. Así, se entiende la UPC como el valor del aseguramiento *per cápita* que da derecho al usuario a recibir del sistema la atención en salud que requiera, dentro de los parámetros del POS, independientemente de su capacidad económica y de su aporte al sistema. En virtud de lo anterior, mensualmente cada EPS recibe, por cada afiliado, el valor de una UPC (o UPC-S según el caso), que proviene de las cotizaciones de trabajadores y empleadores en el caso del régimen contributivo y total o parcialmente subsidiada por el Sistema de Salud, en el caso del régimen subsidiado<sup>94</sup>. Este mecanismo de las UPC estimula además, según estas perspectivas, la eficiencia de las EPS, como lo explicó la ponencia sobre el particular en el Congreso, la cual afirmó al respecto:

*El último postulado constitucional que el proyecto desarrolla al máximo es el de la eficiencia. Y propone múltiples modos de obtenerla. La eficiencia resulta de un mejor*

---

94. En este punto, seguimos en parte la explicación de la Corte Constitucional en la sentencia C-1489 de 2000, M.P. Alejandro Martínez Caballero.

*funcionamiento de cada una de las instituciones. Y en el proyecto se incluyen las principales modificaciones al modo actual de funcionamiento de los hospitales, de los financiadores, de los controladores: se buscan entidades autónomas, solventes, descentralizadas. Pero también depende del diseño de un sistema que, en su conjunto, resulte ágil, versátil y económico. El Sistema de Seguridad Social en Salud que aquí se presenta, con su conjunción de entidades promotoras de salud y entidades prestadoras directas garantiza estas condiciones. Los sistemas de pagos por capitación a las entidades promotoras de la salud son una innovación fundamental para el logro de la eficacia en su manejo. Y, además, las garantiza porque tiene en su fundamento la posibilidad de elección de los usuarios, y la competencia de los promotores y los prestadores por proveer el mejor servicio. Con mejores instituciones, mejor interrelacionadas, más competitivas y con la posibilidad de elección libre por los usuarios, el principio constitucional de la eficacia se desarrolla a cabalidad* <sup>95</sup>.

Finalmente conviene resaltar la importancia que en este esquema institucional tiene la intervención estatal, tanto en su función directora y reguladora, como en sus labores de inspección, vigilancia y control. En efecto, conforme a la propia visión de quienes lo promovieron, la única manera de que este sistema de “pluralismo estructurado” o de “mercado regulado” funcione apropiadamente y logre realmente ser un instrumento de satisfacción del derecho a la salud es que se trate de un mercado controlado y vigilado por las autoridades estatales pertinentes, para evitar los abusos y las inequidades que surgen de las asimetrías que lo caracterizan.

Los anteriores son entonces los principios y diseños esenciales básicos del sistema de salud adoptado por la Ley 100 y por sus reformas ulteriores, que hemos presentado en forma esquemática, por cuanto los analizaremos más en detalle, en una perspectiva de teoría de sistemas, en el capítulo 3 de este informe. Con todo, una obvia pregunta surge del anterior examen y es la siguiente: ¿Hasta qué punto este sistema de salud es un desarrollo adecuado para satisfacer el derecho a la salud, conforme a los contenidos de dicho derecho y a las obligaciones del Estado en esta materia, aspectos que fueron presentados en el capítulo anterior de este trabajo?

Esa pregunta admite diversas formas de respuesta. De un lado, puede evaluarse la compatibilidad teórica y en abstracto del sistema, esto es, si su diseño es en sí mismo armónico con los estándares normativos en esta materia. De otro lado, pueden mirarse, desde una perspectiva de derechos humanos, los resultados de dicho sistema en la satisfacción del derecho. El resto del presente capítulo procede entonces a analizar ambos aspectos.

### **2.3. Estudio de la compatibilidad prima facie del sistema de salud con la Constitución y con los estándares de derechos humanos**

El análisis general del sistema diseñado por la Ley 100 de 1993 y por sus reformas ulteriores permite llegar a la conclusión de que éste, en su formulación normativa abstrac-

9. Ver *Gaceta del Congreso*, año II, No. 130, 14 de mayo de 1993, p. 7.

ta, es compatible con los estándares de derechos humanos, pero que presenta algunas tensiones significativas con dichos estándares, en especial en el tema de equidad y no discriminación.

### 2.3.1. Una compatibilidad *prima facie*

En principio, el sistema previsto por la Ley 100 de 1993, con sus desarrollos posteriores, es una de las posibilidades de política pública para lograr la satisfacción del derecho a la salud, puesto que, como se señaló en el capítulo anterior y en el inicio del presente capítulo, tanto la Constitución como los tratados de derechos humanos confieren a las autoridades una amplia libertad de configuración para diseñar los sistemas de salud. Por consiguiente, nada se opone desde una perspectiva de derechos humanos a que el Estado colombiano haya adoptado un esquema de “pluralismo estructurado” o de “competencia regulada” para la satisfacción del derecho a la salud, independientemente de las discusiones políticas que pueda suscitar la adopción de dicho sistema, siempre y cuando el sistema se proponga satisfacer plenamente y en forma universal dicho derecho, como efectivamente lo señalan los principios establecidos en la Ley 100.

El anterior punto ha sido reconocido por la Corte Constitucional en numerosas sentencias. Por ejemplo, en la C-1489 de 2000, la Corte, luego de examinar detalladamente la lógica de funcionamiento del régimen subsidiado, rechazó el argumento de que la existencia de las Administradoras del Régimen Subsidiado violaba el derecho a la salud y el principio de eficiencia, por supuestamente implicar desvíos de los recursos de la salud a labores administrativas. Dijo entonces esa sentencia:

*El anterior examen es para la Corte suficiente para mostrar que la introducción de las ARS en el RS o de las EPS en el RC no constituye, per se, un sobre costo innecesario, como lo sugieren los actores y algunos intervinientes, ya que esas entidades, encargadas, entre otras cosas, de la intermediación de los recursos de la seguridad social y del aseguramiento de los usuarios, fueron pensadas precisamente para aumentar, por medio de un sistema que algunos denominan de “competencia regulada” y otros de “pluralismo estructurado” (Así, autores como Restrepo M. califican el sistema en salud colombiano de “competencia regulada” mientras que Frenk y Londoño lo denominan una forma de “pluralismo estructurado”), la eficiencia y equidad del sistema de salud, a fin de lograr la universalidad. Como es obvio, algunas personas pueden controvertir la sabiduría y conveniencia de esa opción legislativa, ya que pueden, por muy respetables consideraciones políticas, considerar que ese modelo de subsidio a la demanda no es el más adecuado. Pero el estudio precedente es suficiente para que la Corte concluya que la adopción de ese sistema de salud, con subsidio a la demanda e intermediación de las ARS, era una de las opciones posibles que tenía el Legislador para desarrollar los principios constitucionales de la seguridad social en salud* <sup>96</sup>.

Ahora bien, que el sistema sea *prima facie* compatible con los estándares constitucionales y de derechos humanos no excluye empero que ciertos aspectos importantes del mismo puedan ser muy cuestionables desde una perspectiva del derecho a la salud. Y existen

---

96. Sentencia C-1489 de 2000, M.P. Alejandro Martínez Caballero, Fundamento 19.

al menos cuatro aspectos constitucionalmente problemáticos en el diseño originario de la Ley 100 de 1993, a saber: (i) la debilidad de la asignación de responsabilidades en salud pública; (ii) el establecimiento de ciertas barreras injustificadas de acceso a la salud; (iii) la vulneración al principio de igualdad por el carácter parcialmente regresivo del sistema de cotización; y (iv) la diferenciación inequitativa entre regímenes contributivo y subsidiado. Como se mostrará a continuación, los dos primeros problemas constitucionales han sido parcialmente corregidos por la jurisprudencia constitucional o por reformas normativas ulteriores, pero los otros problemas persisten, incluso con el aval de la Corte Constitucional.

### ***2.3.2. La precariedad de la prevención y la salud pública en la Ley 100***

Uno de los puntos más criticados del diseño y de la implementación del modelo de la Ley 100 ha sido el de salud pública y el de prevención y promoción de la salud. El cuestionamiento es en parte válido pues aunque en sus principios normativos la Ley 100 establecía que la prevención de enfermedades y la promoción de la salud eran componentes prioritarios del sistema de salud, en realidad sus diseños instrumentales y la asignación concreta de responsabilidades a las instituciones que integran dicho sistema tuvieron como resultado un debilitamiento muy considerable de las políticas de salud pública. Como lo han señalado varios analistas, el sistema previsto por la Ley 100 tendió a limitarse a ser un mecanismo de aseguramiento del riesgo financiero de las familias frente a la enfermedad, con lo cual se olvidó que, como se explicó en el capítulo anterior de este trabajo, el derecho a la salud no se restringe al derecho a la atención médica frente a la enfermedad sino que es más amplio, pues busca asegurar a toda la población el goce del más alto nivel de salud física y psíquica. Un sistema de salud compatible con los estándares de derechos humanos debe entonces no sólo asegurar el acceso universal e igualitario al tratamiento médico de la enfermedad sino también prever estrategias de prevención y de salud pública, que se vinculen con los factores subyacentes y determinantes del estado de salud de la población. Esto no ocurrió, pues el sistema de atención a la enfermedad previsto por la Ley 100 no estuvo acompañado de una estrategia consistente y vigorosa de salud pública.

Estas limitaciones de la Ley 100 en el campo de la salud pública han intentado ser corregidas ulteriormente, en especial por la Ley 71 de 2001 y la Ley 1122 de 2007, que reasignaron competencias en esta materia, a fin de fortalecer, aclarar y racionalizar las responsabilidades de las autoridades y de las otras instituciones que hacen parte del sistema en materia de prevención de las enfermedades y promoción de la salud. En especial, el artículo 33 de la Ley 1122 de 2007 estableció que le corresponde al Gobierno Nacional, por intermedio del Ministerio de Protección Social, definir cada cuatro años un Plan Nacional de Salud Pública, que incluya las prioridades, objetivos, metas y estrategias en salud, en coherencia con los indicadores de situación de salud, las políticas de salud nacionales, los tratados y convenios internacionales suscritos por el país y las políticas sociales transversales de otros sectores. Igualmente se establece que dicho plan debe precisar las responsabilidades en salud pública a cargo de la Nación, de las entidades territoriales, y de todos los actores del Sistema General de Seguridad Social en Salud –SGSSS–, que se complementarán con las acciones de los actores de otros sectores definidas en el Plan Nacional de Desarrollo y en los planes de desarrollo territorial. En

desarrollo de ese mandato, por medio del Decreto 3039 del 10 de agosto de 2007, fue adoptado el Plan Nacional de Salud Pública 2007-2010, con lo cual parecería que se empezaran a corregir las limitaciones del diseño originario de la Ley 100 en este campo.

Es aún demasiado temprano para evaluar los resultados de este Plan y su implementación, en especial por cuanto dicho plan y la normatividad general del SGSSS atribuyen responsabilidades considerables a las entidades territoriales, cuyas capacidades son muy desiguales. Pero lo cierto es que la precariedad de la regulación de los temas de salud pública en estos años comportó estancamientos y retrocesos en este campo. Por ejemplo, en estos quince años hubo un debilitamiento de los programas de vacunación y los resultados en esa materia distan de ser satisfactorios. El siguiente cuadro ilustra esos retrocesos y las inequidades que subsisten en relación con uno de los factores usuales de inequidad en materia de salud, que es la capacidad económica, pues muestra los niveles de vacunación por quintiles de ingreso entre 1990 y 2000. Igualmente calcula la relación entre el quintil (20% con mayor ingreso) y el quintil 1 (20% con menor ingreso).

|                       | <i>Niveles de vacunación (%) por quintil de ingreso</i> |             |             |
|-----------------------|---------------------------------------------------------|-------------|-------------|
| <b>Quintiles</b>      | <b>1990</b>                                             | <b>2000</b> | <b>2005</b> |
| q-1                   | 67                                                      | 52,6        | 63,7        |
| q-2                   | 73                                                      | 66,6        | 67          |
| q-3                   | 83,4                                                    | 70,9        | 77,4        |
| q-4                   | 86,5                                                    | 74,2        | 74,6        |
| q-5                   | 84,5                                                    | 71          | 82,7        |
| Total                 | 77,9                                                    | 66          | 71,2        |
| <b>Relación q5/q1</b> | <b>1,26</b>                                             | <b>1,35</b> | <b>1,3</b>  |

Fuente: Datos de encuestas Demografía y Salud. Ver Carmen Elisa Flórez y Victoria Eugenia Soto. Ob. cit., Cuadro 26.

Este cuadro muestra un retroceso sensible en los niveles de vacunación en Colombia, que parecen llegar a un punto crítico en el 2000, y que se habrían corregido parcialmente en 200, pero sin que se lleguen a los niveles de 1990. La equidad también se ha deteriorado levemente, lo cual muestra una doble regresión en este campo.

Es pues importante recordar que un sistema de salud compatible con los estándares de derechos humanos no debe limitarse a la atención de la enfermedad sino que debe contar con estrategias vigorosas de salud pública.

### **2.3.3. Las barreras de acceso a la atención a los servicios de salud**

Un segundo aspecto del sistema de la Ley 100, problemático frente a los estándares internacionales, es que éste prevé limitaciones al acceso a los servicios de salud, que pueden ser potencialmente discriminatorias. Algunas de esas barreras tienen que ver con la previsión de períodos mínimos de cotización para el acceso a ciertos servicios médicos, o la utili-

zación de criterios discriminatorios para la configuración de los beneficiarios del sistema de salud, como sucedía con la exclusión del compañero o compañera permanente de las parejas del mismo sexo como beneficiarios de las prestaciones en salud o pensiones.

La mayor parte de esas limitaciones han sido en gran medida corregidas por la jurisprudencia de la Corte Constitucional, ya sea por decisiones de inconstitucionalidad o por la vía de tutela. Sin embargo, conviene recordar la existencia de esas posibles barreras y discriminaciones en el diseño de la Ley 100 para resaltar la importancia de que la política de salud, además de las consideraciones de eficiencia económica, tome en cuenta los estándares de derechos humanos en la estructuración del sistema de salud. Adicionalmente, porque subsisten inequidades profundas en el sistema, que se encuentran en su diseño mismo y que no han sido corregidas.

### 2.3.4. La uniformidad en las cotizaciones y el principio de igualdad

En materia de equidad ha habido importantes cuestionamientos al sistema de salud vigente, dirigidos a mostrar varias circunstancias propias de la estructura del sistema que antes que realizar dicho principio, configuran situaciones contrarias. En primer lugar se llama la atención sobre el hecho de que el monto de la cotización obligatoria para salud en el caso de los afiliados al régimen contributivo sea para todos igual (12, %), independientemente del monto real del salario devengado. En la práctica esto se traduce en que tanto quien gana un salario mínimo mensual, como quien gana tres o quien gana quince están aportando el mismo porcentaje para salud, lo que comporta una desigualdad evidente frente a la disminución de los ingresos reales del cotizante, con las consecuencias que eso conlleva en relación con el resto de condiciones de las personas asalariadas. La tasa de cotización uniforme es entonces inequitativa pues no está consultando verdaderamente la capacidad de pago del asalariado.

Esta posible inequidad es aún mayor si se toma en cuenta que la normatividad establece un límite, pues señala que a pesar de que el salario devengado sea mayor de 20 salarios mínimos legales, de todos modos la cotización máxima se hará sobre 20 salarios mínimos. Esto hace que, por ejemplo, frente a un salario de 20 salarios mínimos legales, la cotización efectiva ya no sea del 12% sino del 6% y que el régimen contributivo haya dejado de recibir 0, % de contribución de este afiliado <sup>97</sup>.

Algunos defienden esa uniformidad de la cotización y su limitación a un máximo de 20 salarios mínimos, con el argumento de que es necesario por razones de eficiencia, pues la experiencia de otros países mostraría que si se incrementa la base de cotización, hay un incentivo importante a la elusión y evasión del pago de esas contribuciones, por lo altas que éstas serían, como parece haber sucedido en Costa Rica. Pero ese argumento no parece suficiente, pues es posible establecer mecanismos que eviten o reduzcan

---

97. Ver Adriana Rodríguez y Carlos Rodríguez (200). "La garantía de la salud como derecho integral" en Luis Jorge Garay y Adriana Rodríguez (dirs.). *Colombia, diálogo pendiente*. Bogotá. Planeta Paz, pp. 126 y ss.

esa evasión; y precisamente la experiencia costarricense en materia de salud es bastante exitosa, pues gracias a su alto gasto en salud, y a una política universalista combinada con formas adecuadas de focalización destinadas a integrar a la población pobre a los programas universales, ese país ha logrado resultados muy exitosos, para su nivel de desarrollo, tanto en términos de acceso como de equidad y calidad<sup>98</sup>.

Por otra parte, otro de los aspectos que debe considerarse es que la afiliación al régimen contributivo sigue siendo mayoritariamente de trabajadores formales y pensionados, mientras que los independientes representan un porcentaje inferior. Además éstos están en situación de desventaja frente a los empleados, ya que deben asumir de su bolsillo privado la totalidad del monto de la cotización, es decir el 12,% sobre el ingreso, mientras que en el caso de los trabajadores con contrato laboral sólo asumen el 4% del porcentaje de la cotización, pues el resto lo paga el empleador. En esta circunstancia hay claramente una diferencia de trato, que también fue objeto de cuestionamiento ante la justicia constitucional. Allí nuevamente se aceptó la constitucionalidad de la norma, en el entendido de que los trabajadores independientes y los que tienen una relación laboral de subordinación y dependencia se encuentran en una situación jurídica y material distinta que

*... justifica, en principio, desde el punto de vista objetivo, de su razonabilidad y racionalidad, y de la finalidad perseguida por el legislador, que a los trabajadores independientes se les exija el pago íntegro de la totalidad de las cotizaciones con que deben contribuir al sistema de seguridad social* <sup>99</sup>.

No obstante, a pesar del respaldo que se le da a la libertad de configuración del legislador con esta decisión y a la subsistencia de la diferencia entre trabajadores independientes y los vinculados a través de contrato de trabajo, la Corte deja entrever que éste no es del todo un esquema deseable y por eso termina afirmando que en cumplimiento del deber del Estado de ampliar progresivamente la cobertura en seguridad social:

*No se descarta que en un futuro el legislador pueda, consultando las variables propias de las relaciones que surgen entre los trabajadores independientes y sus contratantes y las posibilidades económicas de aquél, crear mecanismos que garanticen la seguridad social para dichos trabajadores en condiciones similares a las que corresponden a los trabajadores vinculados a través de contratos de trabajo*<sup>100</sup>.

---

98. Sobre la financiación y resultados del sistema de salud en Costa Rica, ver Adolfo Rodríguez Herrera (2007) "Sistema de salud y cohesión social. El acceso universal a los servicios de salud en Costa Rica" en Ana Sojo y Andras Uthoff (eds.) *Cohesión social en América Latina y el Caribe: una revisión perentoria de algunas de sus dimensiones* . Santiago de Chile, CEPAL, p. 181 y ss.

99. Sentencia C-60 de 1996, M.P. Antonio Barrera Carbonell.

100. Ídem.

### 2.3.5. Los principios de igualdad y no discriminación: cotizaciones uniformes y la diferenciación de beneficios y financiación entre los regímenes contributivo y subsidiado

Uno de los cuestionamientos importantes en términos de la equidad en salud se ha planteado en relación con la existencia de regímenes diferenciados, que terminan estableciendo una división entre la población a partir de los ingresos, y generando la existencia de un sistema de salud para ricos, otro para las clases medias y otro para pobres. Ello es así porque la cobertura de los Planes Obligatorios en cada uno de los regímenes es diferenciada y los contenidos y beneficios del Plan Obligatorio del régimen subsidiado son menores que los del contributivo, lo que se refleja, entre otros aspectos, en los valores de la unidad de pago por capitación que reciben las EPS por afiliado, y a partir de los cuales se constata que el valor de la UPC del régimen subsidiado se ha mantenido durante los últimos cinco años en un promedio equivalente al 8% de la UPC del contributivo <sup>101</sup>. Además, las personas con mayor capacidad de pago pueden adquirir planes complementarios de salud, a los que difícilmente podrán acceder sectores de la población de escasos recursos, por lo cual su cobertura en salud es más amplia y diferenciada.

Las anteriores consideraciones, encaminadas a advertir los problemas de inequidad en el diseño del sistema por la existencia de dos regímenes diferenciados, fundamentados en la capacidad de pago de la población y en un plan de beneficios de menor alcance para un grupo de la población frente a un plan más amplio al que tiene acceso otro segmento, fueron ventiladas ante la Corte Constitucional en una demanda contra varias normas de la Ley 100, arguyendo precisamente las desigualdades inherentes a la subsistencia de dos regímenes distintos. La Corte no consideró constitucionalmente cuestionable que existieran esos dos regímenes al considerar que

*... no resulta inexorablemente contrario a los principios constitucionales que la ley establezca diferencias entre el marco normativo aplicable a quienes en razón a su capacidad económica puedan pertenecer al régimen contributivo y aquel otro que regirá la afiliación, derechos y beneficios de las personas que en razón a su falta o insuficiencia de capacidad de pago, deberán hacer parte del régimen subsidiado. Sin embargo, sí lo sería que la salud humana resultare menoscabada o desatendida para alguno de estos grupos, en lo constitucionalmente dispuesto*<sup>102</sup>.

101. El porcentaje se determinó comparando los valores fijados por el Consejo Nacional de Seguridad Social en Salud entre 2003 y 2007 en donde se observa que se mantiene la proporción y sacando el promedio. Los valores son los siguientes:

| Año  | UPC Contributivo<br>(anual) | UPC Subsidiado<br>(anual) | Diferencia |
|------|-----------------------------|---------------------------|------------|
| 2003 | \$ 323.316                  | \$ 180.622,80             | ,8%        |
| 2004 | \$ 344.973,60               | \$ 192.344,40             | ,7%        |
| 2005 | \$ 36.673,60                | \$ 203.886                | ,7%        |
| 2006 | \$ 386.882,20               | \$ 21.712                 | ,7%        |
| 2007 | \$ 404.21                   | \$ 227.78                 | 6,3%       |

102. Ver sentencia C-1032 de 2006, M.P. Nilson Pinilla Pinilla.

En este sentido es claro que para el alto tribunal la sola existencia de dos regímenes diferenciados no resulta contraria a la Constitución, aunque se aclara que en todo caso se deben garantizar óptimos niveles de satisfacción del derecho para todos, que es lo que en la práctica no se ha verificado adecuadamente.

El argumento desarrollado por la Corte es entonces cuestionable, pues allí se confunde la libertad de configuración legislativa y el principio de progresividad en materia de derechos sociales, con los alcances del principio constitucional de igualdad. No se desconoce que a la luz de la Constitución el legislador está facultado para diseñar el sistema de salud que se avenga a las consideraciones políticas que se estimen en el marco del debate democrático<sup>103</sup> y que en virtud de la progresividad que debe inspirar la materialización de los derechos sociales no puede exigirse que de una sola vez se garanticen estos derechos a todos por igual, sino la adopción de medidas que paulatinamente conduzcan al objetivo deseado. Sin embargo, una cosa es aceptar dicha progresividad y otra admitir, al amparo de ésta, la pervivencia de desigualdades profundas en la garantía de los derechos.

Ahora bien, la previsión de los dos regímenes, con beneficios y financiación menor para el subsidiado, ha sido defendida con el argumento de que, dadas las restricciones financieras del sistema, resultaba indispensable esa medida temporal para dinamizar el régimen subsidiado y vincular en forma rápida a la totalidad de la población a los mecanismos de aseguramiento, para nivelar luego los planes de beneficios. Pero ese argumento resulta inválido, pues precisamente introduce una discriminación inaceptable en el desarrollo mismo del sistema de salud y en la satisfacción progresiva del derecho, pues consagra ineluctablemente dos formas de salud: una de mejor categoría y mejor financiada para quienes tienen mayor capacidad de pago, y otra más precaria y pobre para los pobres. La estrategia aceptable era entonces que la Ley 100 hubiera adoptado un plan de beneficios sostenible financieramente para toda la población.

El otro argumento con el cual se suele legitimar el régimen diferenciado de beneficios entre el contributivo y el subsidiado es con la tesis de que no existe afectación a la igualdad pues aquella persona del régimen subsidiado que no logra acceder a una prestación a la cual tiene derecho un beneficiario del contributivo no es discriminada, ya que puede acceder a ese servicio médico por otra vía; según esta tesis, dicha persona puede acudir a las redes públicas de instituciones prestadoras de salud, que cuentan con subsidios de oferta. Pero ese argumento no es aceptable pues es contrario a la lógica misma del sistema, que parte de la idea de que la satisfacción más adecuada del derecho a la salud es precisamente establecer mecanismos de aseguramiento y subsidios a la demanda para los más pobres. Es por ello que en los últimos años los subsidios a la oferta han sido reducidos considerablemente, por lo cual la inequidad persiste.

---

103. Aunque en todo caso es pertinente señalar que la libertad de configuración legislativa no es absoluta, ya que está en todo caso limitada por el respeto del carácter irrenunciable de la seguridad social y los principios de solidaridad, eficiencia y universalidad consagrados en la Constitución como regentes de la prestación de los servicios de salud. Por lo mismo es posible debatir en la justicia constitucional si los desarrollos legislativos son compatibles, de un lado, con los principios constitucionales enunciados, y además, con los principios derivados de los instrumentos internacionales que protegen el derecho a la salud. En aplicación de lo anterior, se declaró inconstitucional una norma legal que reducía la cotización de solidaridad del régimen contributivo, pues consideró que esa disposición legal vulneraba el mandato de la ampliación progresiva de la seguridad social contenido en los tratados internacionales referidos a la materia. Ver sentencia C-116 de 2000, M.P. Alfredo Beltrán Sierra.

Lo que se cuestiona no es entonces la existencia en sí misma de dos regímenes diferenciados sino la desigualdad en los niveles de cobertura frente al derecho que tienen los grupos que pertenecen a uno u otro régimen. No se está pretendiendo, como lo sugiere la Corte, una cobertura que ampare a todos los habitantes frente a todas las contingencias posibles, sino que la cobertura que se otorgue sea equitativa para todos los sectores de la población, a menos que las diferencias de trato puedan estar justificadas en criterios de razonabilidad y proporcionalidad que den fundamento adecuado al trato diferenciado, lo que no parece ocurrir, considerando que en este caso la base de la distinción no es otra que la capacidad de pago como factor que origina la diferencia de posición económica de los destinatarios del servicio.

Por eso, aunque la Corte recalca el papel regulador del Estado, es claro que ella asume la postura que acepta que en una economía de mercado son reales y admisibles las diferencias en los ingresos y capacidad adquisitiva de los miembros de la sociedad, y en la dinámica del libre mercado cada quien puede actuar de acuerdo con sus posibilidades económicas reales y pagar por los servicios que estén a su alcance, olvidando a todos aquellos que no tienen los recursos para poder comprar esos servicios. Por esa razón, desde las otras posturas que consideran que los derechos no pueden ser concebidos como mercancías y que su realización no puede ser entregada a los postulados de la economía neoclásica, los pronunciamientos de la Corte en este sentido pueden ser fuertemente criticados, porque se insertarían en la tendencia que “apunta hacia una comprensión de la atención en salud como un servicio de atención individual de enfermedades que se compra en el mercado de servicios, y cada vez menos como un derecho ciudadano vinculado al bienestar”<sup>104</sup>. Además, aunque los tratados de derechos humanos en materia de derechos sociales incorporan el mandato de progresividad, ésta implica la adopción de medidas que efectivamente den cuenta de los avances en la realización del derecho, que para este caso estarían representadas en la equiparación paulatina de los servicios a los que tienen derecho los afiliados de ambos regímenes de salud, a pesar de lo cual las cifras no dan cuenta de ningún avance significativo en dicha meta de igualación y al contrario se mantiene la constante distinción, que casi termina siendo vista como connatural al modelo económico, pero que, como se dijo, desde otras perspectivas que abogan por que los derechos no sean concebidos como bienes de mercado, resultan verdaderamente inaceptables.

El sistema de salud, en su propio diseño, introduce entonces discriminaciones vinculadas a la capacidad de pago, con lo cual ha provocado una segmentación del mercado de la salud, que parece contrario a los principios de universalidad, equidad y solidaridad, que en principio inspiran a la propia Ley 100 y que son los que armonizan con los estándares de derechos humanos. Así, de un lado están los más pobres, para los cuales se prevé un régimen subsidiado con menores beneficios; o los vinculados, que deben acudir a las redes de prestadores públicos, que tienen cada vez menor financiación por la reducción de los subsidios de oferta. De otro lado se encuentran las clases medias asalariadas, que tienen un régimen contributivo con un plan de beneficios más completo, mientras

---

104. Mario Hernández Álvarez (1999). “El derecho a la salud en Colombia: obstáculos estructurales para su realización” en *La salud está grave: una visión desde los derechos humanos*. Plataforma Colombiana de Derechos Humanos, Democracia y Desarrollo, Bogotá, 2000, p. 144.

que los sectores más pudientes no sólo acceden a dicho régimen contributivo sino que además pueden pagar planes complementarios y formas de aseguramiento privado para una medicina de mayor calidad.

#### 2.4. Una breve mirada a los resultados del sistema en términos de la realización del derecho a la salud

El análisis precedente ha mostrado que el sistema adoptado por la Ley 100 es uno de los sistemas posibles de desarrollo del derecho a la salud, por lo que *prima facie* es compatible con los estándares constitucionales y de derechos humanos, a pesar de que presenta problemas de diseño normativo en ciertos aspectos importantes, en especial en términos de equidad y no discriminación. Ahora bien, esa adecuación normativa *prima facie* del sistema de “pluralismo estructurado” no significa que éste no pueda tornarse problemático constitucionalmente o frente a los estándares internacionales de derechos humanos, por sus efectos prácticos, pues si el sistema no logra realizar efectivamente el derecho a la salud, entonces no puede decirse que realmente satisfaga el derecho a la salud. Incluso, la misma sentencia de la Corte Constitucional C-1489 de 2000, que avaló el diseño básico del régimen de pluralismo estructurado o competencia regulada, precisó al respecto:

*Es pues posible que una regulación que en abstracto parece ajustarse a la Carta, pueda tornarse inconstitucional por sus efectos prácticos. Sin embargo, para que ello ocurra, es necesario que esos desarrollos prácticos inconstitucionales no provengan de una indebida aplicación de las regulaciones legales pues, como se dijo, para solucionar los problemas de desconocimiento de los preceptos legales, o de inadecuada aplicación de los mismos, el ordenamiento prevé otros mecanismos judiciales distintos a la acción de inconstitucionalidad. Por ello, para que una regulación legal, que en apariencia y en abstracto se ajusta a la Carta, pueda ser declarada inexecutable, debido a consideraciones empíricas, es necesario establecer que las situaciones inconstitucionales derivan de los diseños institucionales y de las regulaciones establecidas en la ley. Por ende, en tales eventos es necesario demostrar que el sistema previsto por la ley puede hipotéticamente funcionar pero que, en la práctica, y por factores que eventualmente los redactores de la ley no previeron adecuadamente, el sistema ha dejado de tener un desarrollo satisfactorio, y esa evolución afecta derechos constitucionales y es por consiguiente contraria a la Carta*<sup>105</sup>.

Es pues necesario analizar brevemente el impacto del sistema adoptado por la Ley 100 de 1993 en el goce del derecho a la salud, lo cual realizaremos en este punto, basándonos en lo esencial en fuentes secundarias de información, luego de señalar la dificultad de estas fuentes para este balance, en la medida en que en Colombia aún carecemos de un sistema de información confiable de la política social, que además se adecue a una perspectiva de derechos humanos.

---

10. Sentencia C-1489 de 2000, M.P. Alejandro Martínez Caballero, Fundamento 22.

### 2.4.1. *Lafaltadeunsistemadeinformacióndelapolíticadesalud en perspectiva de derechos humanos*

Para realmente analizar qué tanto el sistema de salud ha logrado realizar o no el derecho a la salud en Colombia, sería necesario adoptar indicadores de derechos humanos que nos permitieran evaluar los esfuerzos y resultados del sistema, para lo cual conviene aprovechar la importante discusión que en los últimos años se ha desarrollado en torno a la elaboración y selección de indicadores para el monitoreo de políticas públicas para la realización de los derechos humanos en general, y de los derechos económicos, sociales y culturales en particular<sup>106</sup>.

Estos análisis han señalado que los indicadores sobre la realización de los derechos humanos en general y de los derechos económicos sociales y culturales en particular, como el derecho a la salud, fuera de reunir los atributos propios de todo indicador, como ser válidos y confiables<sup>107</sup>, deben gozar de otras cualidades, entre las cuales conviene destacar especialmente las que se enumeran a continuación:

En primer término, un indicador de derechos humanos en general (y un indicador de la realización del derecho a la salud en particular) debe tener un fundamento en una obligación normativa específica del Estado en general o de algunas autoridades en particular, obligación que a su vez se encuentra vinculada al goce de un derecho por parte de la población. Por eso, usualmente los indicadores están asociados al desarrollo por las autoridades de sus distintas obligaciones de respeto, protección y cumplimiento en materia de derechos humanos.

En segundo término, esos indicadores deben estar asociados al contenido propio de los distintos derechos considerados (como la educación, la salud, la reparación, etc). Por ello, en el campo de la salud, y conforme a lo señalado en el capítulo anterior, los indicadores deberían poder evaluar el sistema de salud en relación con su disponibilidad, accesibilidad, aceptabilidad y calidad.

En tercer término, es importante resaltar que existen también principios normativos transversales a los distintos derechos humanos, que deben ser tomados en cuenta en la elaboración y selección de los indicadores, como son los principios de no discriminación e igualdad, la dimensión participativa que debe tener la elaboración y ejecución de las políticas públicas asociadas a derechos humanos, la transparencia, el deber de las autoridades de rendir cuentas, etc. Esto explica, en particular, que un indicador de derechos humanos deba usar, en lo posible, criterios diferenciales (género, etnia, edad, condición socioeconómica, etc.), con el fin de poder desglosar los datos por los motivos de diferenciación prohibidos y determinar entonces si existen o no discriminaciones en el diseño de la política pública o en sus resultados.

106. Ver, al respecto, a nivel internacional el Informe de la 18ª Reunión de los Presidentes de los Comités de los distintos tratados de derechos humanos en Ginebra, 22 y 23 de junio de 2006: HRI/MC/2006/7; a nivel nacional el trabajo de Luis Eduardo Pérez sobre indicadores del derecho a la educación, en: Luis Eduardo Pérez, Cesar Rodríguez y Rodrigo Uprimny (2007). *Los derechos sociales en serio*. Bogotá, DeJusticia.

107. Para una presentación de estas nociones, ver, entre otros, Herman Smith (1991). *Strategies of Social Research*, Fort Worth, Holth, Rinehart and Winston Inc., p. 93 y ss.

En cuarto término, esos indicadores no deben restringirse únicamente a los indicadores cuantitativos, estadísticos o numéricos, pues frente a ciertas obligaciones son necesarios, o más útiles, indicadores de tipo cualitativo. Tampoco dichos indicadores deben restringirse a los indicadores llamados objetivos (entendidos como hechos) sino también a los indicadores subjetivos (ligados a las percepciones de las personas) pues en ocasiones la percepción subjetiva es tan importante como la situación objetiva.

En quinto término, es útil asociar la elaboración y selección de los indicadores con la propuesta de “puntos de referencia” acerca del cumplimiento de una obligación estatal. Esto quiere decir que, es importante no sólo que exista un acuerdo sobre cómo medir el cumplimiento de una obligación estatal (indicador) sino que se logre una cierta concertación sobre cuánto se puede alcanzar en esta materia en un determinado período de referencia (punto de referencia).

Finalmente, en materia de derechos humanos se ha desarrollado un cierto consenso acerca de que es útil distinguir entre indicadores estructurales, de proceso y de resultado, en relación con las distintas obligaciones del Estado. Los indicadores *estructurales* se refieren a dimensiones normativas e institucionales y tienen que ver con la incorporación o no de las normas de derechos humanos pertinentes, y con la existencia o no de mecanismos institucionales adecuados que promuevan y protejan dichos derechos. Los indicadores *de proceso* analizan las políticas estatales directamente relacionadas con el cumplimiento de las obligaciones en derechos humanos por los Estados y comprenden los programas públicos e intervenciones específicas que un Estado adopta para realizar un determinado derecho. Finalmente, los indicadores *de resultados* reflejan los logros, individuales y colectivos, que muestran el estado de realización de un derecho humano en un determinado contexto.

Conforme a estos criterios, en años recientes, organismos especializados de Naciones Unidas y del Sistema Interamericano han propuesto algunos indicadores en perspectiva de derechos humanos para el seguimiento de las políticas públicas en general y de las políticas de salud en particular. En nuestro país, en los últimos años ha habido también avances importantes en este campo, en especial gracias al Programa de Seguimiento y Evaluación de Políticas Públicas en Derechos Humanos –ProSeDHer– que ha realizado la Defensoría del Pueblo para precisamente desarrollar un monitoreo de las políticas públicas en perspectiva de derechos humanos. Igualmente, el Gobierno se encuentra también desarrollando una investigación, para contar con un diagnóstico y unas herramientas técnicas con el fin de hacer un seguimiento permanente del estado de implementación de los derechos económicos, sociales y culturales en el país, a través del Proyecto de Observatorio de los DESC<sup>108</sup>. Sin embargo, a pesar de esos avances, no existe aún en Colombia un sistema público de información confiable sobre los desarrollos de las políticas sociales, que acoja una perspectiva de derechos humanos.

---

108. Ver los párrafos 104 y ss. del V Informe de la República de Colombia al Comité de Derechos Económicos, Sociales y Culturales. Bogotá, Ministerio de Relaciones Exteriores, 2008.

Esto no significa que no existan fuentes importantes de información para evaluar ciertos aspectos de la satisfacción del derecho a la salud, pues por ejemplo las encuestas de calidad de vida del DANE de 1997 y 2003, o las encuestas nacionales de demografía y salud de Profamilia realizadas cada cinco años desde 1990, o las compilaciones estadísticas anuales del Ministerio de Protección Social sobre indicadores básicos de salud, aportan elementos muy útiles para evaluar el estado del derecho a la salud en Colombia. Simplemente señalamos que estos indicadores carecen de un enfoque explícito de derechos humanos, por lo cual en este acápite debemos usar esas estadísticas sociales existentes, intentando interpretarlas en clave del derecho a la salud. Sin embargo, conviene resaltar que esta carencia de un sistema de información de la política social en perspectiva de derechos humanos ya implica un cierto incumplimiento de las obligaciones internacionales del Estado colombiano en este campo, pues hace menos transparente el diseño y la ejecución de las políticas públicas, aparte de que dificulta considerablemente la rendición de cuentas.

Ahora bien, los análisis que se han realizado en relación con los resultados de la implementación de la reforma en el sistema de salud en el año 1993 son muy diversos y desde perspectivas muchas veces encontradas. En lo que sigue no se pretende abordar exhaustivamente la totalidad de aspectos que han sido objeto de cuestionamiento desde distintos enfoques; simplemente buscamos presentar brevemente algunos de los principales desafíos a los que el modelo adoptado pretendió responder y que tienen relación directa con la garantía efectiva del derecho, los cuales aún siguen teniendo plena vigencia y plantean importantes cuestionamientos frente al mantenimiento de la estructura actual del sistema y la necesidad de tomar los correctivos apropiados. Esta breve valoración únicamente pretende mostrar la tesis señalada en la introducción de este trabajo, a saber, que a pesar de los logros indudables que ha tenido el sistema de salud adoptado por la Ley 100 en ciertos aspectos, sin embargo dista de haber logrado una verdadera satisfacción del derecho a la salud, pues persisten graves problemas de equidad, universalidad y calidad.

Para realizar este análisis, hemos reformulado de manera simple, en clave de derechos humanos, algunas de las estadísticas sobre el sistema de salud, tratando de sugerir algunos indicadores de proceso sobre disponibilidad, accesibilidad, aceptabilidad y calidad del sistema de salud, así como algunos indicadores de resultado sobre el goce del derecho por la población.

#### ***2.4.2. Un indicador de disponibilidad: el incremento del gasto público y las discusiones sobre su eficacia y la destinación de los recursos***

Una de las obligaciones del Estado para la realización de los derechos sociales conforme al PIDESC es la adopción de medidas de orden legislativo y administrativo para la realización de los derechos, y la destinación hasta el máximo de los recursos disponibles para el logro de dicho objetivo. Por consiguiente, es importante analizar los esfuerzos que un Estado y una sociedad determinados realizan con el fin de obtener recursos para satisfacer el derecho a la salud. Un indicador aproximado de este esfuerzo es la evolución del gasto en salud, que es resumida en el siguiente cuadro, desde la adopción de la Ley 100.

| <b>Gasto en salud<br/>como % del PIB</b>          |             |             |             |             |
|---------------------------------------------------|-------------|-------------|-------------|-------------|
| <b>Tipo de gasto</b>                              | <b>1993</b> | <b>1997</b> | <b>2000</b> | <b>2003</b> |
| (1) Contributivo                                  | 1,6         | 2,8         | 3           | 3,4         |
| (2) Subsidiado                                    |             | 0,6         | 0,7         | 0,8         |
| (3) Subsidio oferta                               | 1,1         | 2,1         | 1,8         | 1,6         |
| (4) Otros gastos entidades públicas               | 0,4         | 0,6         | 0,6         | 0,6         |
| (5) Total gasto público:<br>(1) + (2) + (3) + (4) | 3,1         | 6,1         | 6,1         | 6,4         |
| (6) Seguros privados                              | 0,5         | 0,5         | 0,6         | 0,6         |
| (7) Gasto de bolsillo                             | 2,7         | 2,9         | 0,9         | 0,6         |
| (8) Total gasto privado: (6) + (7)                | 3,2         | 3,4         | 1,5         | 1,2         |
| Gasto total: (5) + (8)                            | 6,3         | 9,5         | 7,6         | 7,6         |

Fuente: Elaborado a partir de los datos de Barón sobre cuentas de salud. Ver Olga Lucía Acosta y otros (2007). "Equidad en el financiamiento del SGSSS" en VV.AA. *Avances y desafíos de la equidad en el sistema de salud colombiano*. Bogotá, DNP, Fundación Corona, Universidad de los Andes y Universidad del Rosario, Cuadro 24. Los datos han sido reelaborados parcialmente para este informe.

Como se ve, durante los primeros años de la reforma, la evolución del gasto en salud creció en forma significativa pues pasó de representar 6,3% del PIB a 9,% en 1997, para luego estabilizarse en 7,6%. Pero más importante que ese aumento del gasto general en salud ha sido la recomposición de dicho gasto en términos de la relación entre el gasto público y el gasto privado. En efecto, en 1993, el gasto privado, y en especial el gasto de bolsillo, eran altos pero su participación se reduce de manera muy sensible en los años siguientes, pues cae de 3,2 puntos del PIB a 1,2% entre 1993 y 2000. La reducción más significativa es la del gasto de bolsillo que cae dos puntos del PIB en ese período. En cambio el gasto público crece significativamente, en especial el gasto vinculado a las cotizaciones del régimen contributivo, que duplican su participación. Así el gasto en el régimen contributivo crece de 1,6% a 3,4% del PIB entre 1993 y 2003, mientras que el gasto público total<sup>109</sup> en salud se incrementa de 3,1% a 6,4% del PIB en esos años.

109. Algunos analistas no caracterizan el gasto vinculado al régimen contributivo como gasto público, por tratarse de recursos que no provienen de impuestos o tasas sino de aportes a la seguridad social, que tienen una naturaleza jurídica particular, al ser contribuciones parafiscales. Esa precisión es importante, pero para efectos de nuestro análisis es irrelevante, pues lo que nos interesa es determinar la diferencia entre el gasto que hacen voluntariamente los hogares en salud (seguros privados y gastos de bolsillo) y el gasto financiado con recursos captados obligatoriamente por normas imperativas del Estado, como los impuestos o las contribuciones parafiscales.

Esa evolución es en principio positiva pues el incremento del gasto en salud puede significar –aunque no obligatoriamente<sup>110</sup>– una mayor oferta y disponibilidad de servicios de salud para la población. A su vez, la reducción del gasto de bolsillo de los hogares parece indicar que uno de los propósitos de la Ley 100, que era cubrir el riesgo financiero de las familias frente a la enfermedad, ha sido parcialmente alcanzado, pues las personas gastan menos dinero en forma directa en la atención de la enfermedad. Finalmente, el incremento del gasto público total en salud, ligado en especial al aumento de los aportes al régimen contributivo, parece indicar un mayor esfuerzo de las instituciones públicas por satisfacer el derecho a la salud.

Con todo, esta evolución no deja de suscitar polémicas.

De un lado, pese a que el crecimiento del gasto público en salud ha sido el más grande en la historia reciente del país, no es tan claro que la inversión de los recursos esté siendo totalmente apropiada y los hospitales públicos se mantienen en quiebra al punto de que se ha verificado el cierre de varios de ellos<sup>111</sup>. La crisis de la red pública hospitalaria se agudizó con la expedición de la Ley 344 de 1996, que convirtió los recursos transferidos históricamente a los hospitales públicos en subsidios a la demanda, por lo que éstos dejaron de recibir recursos para su funcionamiento, y debieron empezar a sostenerse con la facturación y venta de servicios.

Esta situación ha llevado a la quiebra a varios hospitales públicos y al cierre continuo de éstos, pues no han podido competir con los otros prestadores, lo que se explica en parte porque en la práctica, la única posibilidad que les queda a estos hospitales para subsistir es la atención a población del régimen subsidiado o vinculada, que depende de la contratación con recursos de las direcciones territoriales de salud, pero que en ambos casos resultan insuficientes y producen déficit, en especial en los hospitales de niveles II y III, puesto que estos servicios son los que menos se contratan “ya que el régimen subsidiado sólo en algunos casos cubre servicios de mayor complejidad y lo mismo ocurre con los pacientes sin capacidad de pago o vinculados”<sup>112</sup>. Es claro entonces que el mercado des-

110. La precisión que hace Titelman es importante: “En el caso de los sistemas de salud, la evidencia internacional muestra que gastar más no siempre asegura mejores resultados. Estados Unidos gasta por este concepto alrededor del 13% del PIB y su cobertura poblacional e indicadores de salud están por debajo de aquellos de los demás países de la Organización de Cooperación y Desarrollo Económicos (OCDE), que gastan en promedio alrededor de 8% a 9% del PIB. Esto sugiere que la forma en que se organiza la estructura de financiamiento y provisión de servicios del sector salud influye fuertemente en las demandas de recursos del sector y en los resultados que se obtengan” Cfr. Daniel Titelman (2003). “El papel del aseguramiento en la protección social” en *Revista de la CEPAL*.

111. Un ejemplo emblemático del cierre de hospitales públicos lo constituye el cierre del Hospital San Juan de Dios en Bogotá, actualmente en proceso de liquidación, a pesar de haber sido declarado, mediante la Ley 73 de 2002, monumento nacional junto con el Instituto Materno Infantil (artículo 1) y haberse autorizado en el artículo 4 de la misma ley a los Ministerios de Salud (hoy de la Protección Social) y de Educación Nacional, “para asignar en los presupuestos anuales los recursos económicos necesarios para que el Ministerio de Salud de acuerdo con la facultad que otorga el inciso segundo del artículo 3 de la Constitución Política, contrate servicios con los hospitales universitarios para las personas que no estén vinculadas a ninguno de los sistemas que amparan su derecho constitucional a la salud, y para que el Ministerio de Educación incluya en su presupuesto las partidas indispensables para las investigaciones que en el área de la salud, realicen tales entidades”.

112. El argumento expuesto es desarrollado por Natalia Paredes Hernández (1999). “A cinco años de la reforma del sistema colombiano ¿qué ha pasado con el derecho a la salud? en: *La salud está grave: una visión ... cit.*, p. 174.

tinado a promover la autofinanciación de los hospitales públicos no ofrece condiciones para que éstos puedan competir con los demás prestadores de servicios.

La tensión es muy grande porque a pesar de que aún hay muchos servicios que requieren la financiación de la oferta, por ejemplo la atención a los vinculados, ésta tiende a reducirse cada vez más. No obstante, es claro que aun bajo la existencia de la Ley 100, nada impide que en ciertos eventos puedan girarse recursos públicos directamente a las instituciones prestadoras para la prestación de los servicios en circunstancias especiales. Así lo declaró la Corte Constitucional al decidir sobre las objeciones presidenciales formuladas contra un proyecto de ley por el cual se estableció la especial protección del Estado para los hospitales universitarios y se facultó a los ministerios de Educación y de Protección Social para asignar directamente recursos a estos hospitales. Dijo la Corte:

*El artículo 4° del proyecto de ley es objeto de estos mandatos, puesto que pretende vincular a la prestación de los servicios de salud a los hospitales universitarios que, según se precisó, son entidades que cuentan con la experiencia y la trayectoria en el campo de la asistencia pública a las personas que carecen de recursos económicos. Con esta determinación se pretende imprimirle eficiencia a los servicios de seguridad social en salud, en la medida, que no es eficiente un sistema de seguridad social que deja sin cubrimiento a parte de la población, precisamente la destinataria de los servicios que prestaría éste hospital universitario.*

*Ahora, la circunstancia de que en la Ley 100 de 1993 se adopte un esquema de financiación para las empresas sociales del Estado con base en la venta de servicios, no quiere significar que el Legislador no pueda, en ejercicio de su competencia constitucional, establecer una regulación especial como la consagrada en el proyecto de ley que se revisa, con el objeto de amparar a las personas que no están vinculadas a la seguridad social en salud, pero que, no obstante, tienen derecho a ella, tal como lo prescribe la citada norma superior.*

*En cuanto a la presunta vulneración del principio de igualdad por el hecho de que la norma objetada otorga un trato preferencial al Hospital San Juan de Dios, que rompe con la igualdad de trato respecto de otras entidades prestadoras del servicio público de salud, la Corte encuentra que tal objeción es infundada, ya que se toma un parámetro de comparación errado. El Hospital San Juan de Dios se ha convertido en un hospital público por lo que la norma legal lo que establece en la práctica es un subsidio a la oferta, no a la demanda. El término de comparación no debe ser entonces entre el Hospital San Juan de Dios y los hospitales que pertenecen al sistema de subsidio a la demanda, sino entre el primero y los demás hospitales del sistema de subsidio a la oferta, caso en el cual no hay lugar a hablar de una diferencia de trato, cuando lo que existe es el aporte de recursos al sistema público de salud. El carácter especial del Hospital San Juan de Dios, en virtud del proyecto de ley examinado, impide hacer una comparación automática entre éste y las empresas sociales del Estado. **Además, la Constitución no impide que se destinen recursos públicos para atender las necesidades de la salud.** Otra cosa es que la Ley 100 de 1993 u otra ley en materia de seguridad social*

*en salud fjen una política en sentido diverso que no es objeto de juzgamiento en este proceso pero que puede enmarcarse dentro del ámbito de configuración que tiene el Legislador”<sup>113</sup> (negrillas fu era del original).*

Por otra parte se ha cuestionado constantemente el hecho de que un gran porcentaje de los recursos se quede en los agentes intermediarios de la salud, para quienes la rentabilidad del negocio de la salud ha sido indudable. Por ejemplo, según los análisis de Barón, los gastos de administración en salud son de aproximadamente el 18%, que es bastante alto en términos de comparaciones internacionales<sup>114</sup>.

En tercer término, algunos consideran que ese aumento de la financiación de la salud con un peso creciente de las contribuciones en seguridad social, que derivan esencialmente del empleo formal, sin un incremento igualmente importante del gasto en salud derivado de impuestos, es cuestionable, no sólo en términos de eficacia para alcanzar la cobertura universal, sino de equidad y de su capacidad de contrarrestar los efectos adversos de las recesiones económicas. Así, esa forma de financiamiento tiene una eficacia limitada para alcanzar la universalidad, pues una parte considerable de la fuerza de trabajo en las sociedades latinoamericana no está vinculada al empleo formal. Tampoco tiene dicha financiación fuerza contracíclica pues el monto global de las cotizaciones depende del volumen de empleo formal, lo cual significa que éstas caen en las recesiones, que es cuando en general las personas requieren mayor protección social. Finalmente, esa financiación puede ser inequitativa pues tiene menor efecto redistributivo que una financiación de la salud fundada en impuestos generales, pues las cotizaciones tienden a ser uniformes (o incluso regresivas, por tener límites en sus bases) mientras que algunos impuestos tienen tarifas progresivas<sup>11</sup>. Por ello, varios autores recomiendan aumentar el gasto en salud con base en impuestos, aprovechando la débil presión fiscal de países como Colombia, en donde los impuestos no llegan a representar siquiera un 20% del PIB.

Finalmente, aunque es claro que la reducción del gasto de bolsillo significa en general una disminución de las barreras económicas de acceso a los servicios de salud, que deberían en general beneficiar a los más pobres e incrementar la equidad en el acceso a la salud, eso no es obligatoriamente así. Es probable que esos gastos de bolsillo provinieran anteriormente de los estratos más ricos de la sociedad; su reducción podría entonces significar que dichos estratos dejaron de usar formas de medicina privada para acceder a los servicios del sistema de salud financiado con recursos públicos. La reducción del gasto privado no significa entonces obligatoriamente que haya aumentado el acceso de los más pobres o la equidad en el acceso. Es pues necesario analizar indicadores más específicos de acceso, en lo posible analizados de manera desagregada por poblaciones vulnerables y marginadas.

---

113. Sentencia C-120 de 2001, M.P. Manuel José Cepeda Espinosa.

114. Dato suministrado por el profesor Barón en una conferencia en la Universidad Javeriana el 17 de abril de 2008.

11. Para perspectivas críticas sobre una financiación fundada exclusivamente en contribuciones del empleo formal, ver Jorge Iván González (2002). “Salud y seguridad social: entre la solidaridad y la equidad” en *Espacio Abierto*, No. 2. Ver igualmente Daniel Titelman (2003). “El papel del aseguramiento en la protección social”, en *Revista de la CEPAL*.

### 2.4.3. Un indicador de accesibilidad: los avances y límites en materia de cobertura

A pesar del crecimiento en las tasas de afiliación, verificado especialmente en los primeros años de adopción del sistema de seguridad social en salud, el porcentaje de colombianos que aún no están afiliados a ninguno de los dos regímenes sigue siendo elevado. Para el caso del régimen subsidiado, diseñado para garantizar la cobertura a los sectores de menos ingresos, en el 2003 era apenas del 23% de la población. A esto se suman los problemas específicos que se han presentado por la ausencia de mecanismos para definir la afiliación de los trabajadores que pierden repentinamente sus empleos y todas las dificultades detectadas en el funcionamiento del SISBEN.

En el momento en que se aprobó la Ley 100 ya se había iniciado el diseño técnico del SISBEN por parte de la Misión Social del Departamento Nacional de Planeación, como un instrumento genérico para la focalización de programas sociales. La ley desarrolló, sobre esta base, el sistema de carnetización para el régimen subsidiado<sup>116</sup>.

Cuando se puso en marcha el sistema para agilizar la selección de beneficiarios de los subsidios se autorizó la utilización de mecanismos, como los listados censales en los municipios con altos índices de *necesidades básicas insatisfechas* (NBI), y la estratificación socioeconómica existente para el cobro de servicios públicos domiciliarios. En 1994 se publicaron los instructivos y cartillas para la aplicación y organización del SISBEN en el nivel local y se inició un programa de apoyo para su implementación. En 199 se convirtió en obligatorio su uso para los municipios de mayor tamaño poblacional y desarrollo institucional, bajo la responsabilidad de los alcaldes. Con el Acuerdo 77 de 1997, del Consejo Nacional de Seguridad Social en Salud, la obligación se extendió a todos los municipios del país. Este acuerdo reglamentó además procedimientos para la vigilancia y control del SISBEN, como los informes al Consejo Territorial de Seguridad Social en Salud, la verificación por parte de las direcciones locales y distritales de salud, las personerías municipales, las veedurías comunitarias y mesas de solidaridad, y fijó criterios para hacer nuevas afiliaciones, privilegiando el mantenimiento en la afiliación de los ya incluidos.

El mencionado acuerdo también estableció que para la asignación de los cupos adicionales disponibles, teniendo en cuenta los recursos municipales, las alcaldías debían elaborar una lista de potenciales afiliados. Ésta debía incluir a población perteneciente a los niveles 1 y 2 de las categorías SISBEN,

*... teniendo en cuenta el siguiente orden: 1. Población del área rural; 2. Población indígena; 3. Población urbana. En cada uno de los grupos de población se priorizarán los potenciales afiliados así: 1. Mujeres en estado de embarazo y niños menores de cinco años; 2. Población con limitaciones físicas, síquicas y sensoriales; 3. Población de la tercera edad; 4. Mujeres cabeza de familia; 5 . Demás población pobre y vulnerable.*

---

116. Sobre el SISBEN ver: Óscar Fresneda Bautista (2003). "La focalización en el régimen subsidiado de salud. Elementos para un balance" en *Revista Salud Pública*, Diciembre, Vol. , No. 3, p. 209 a 24.

Con base en esta agrupación la selección se lleva a cabo teniendo en cuenta el ordenamiento de acuerdo con el puntaje del índice SISBEN, hasta que los cupos vacantes sean provistos.

Este procedimiento busca combinar los dos enfoques de selección, bajo el supuesto de que el índice SISBEN identifica a los pobres por ingresos, dando prioridad a ciertos grupos vulnerables, dentro del amplio grupo de quienes carecen de capacidad de pago.

El Documento Conpes de 2001 define criterios generales para modificar el índice SISBEN, actualizar la información de las encuestas, mejorar algunos procesos operativos y mecanismos de control de calidad sobre la información. La aplicación de los lineamientos definidos busca implantar un “nuevo instrumento de focalización”.

La Ley 71 de 2001, a través de la cual se sustituyó la Ley 60 de 1993, otorga al Conpes la exclusiva competencia de definir el instrumento de focalización que va a ser utilizado en el régimen subsidiado, y establece que su información debe ser actualizada cada tres años (artículos 48 y 94). También otorga al SISBEN la función adicional de determinar la “población pobre por atender”, que corresponde con los vinculados de los municipios, es decir, quienes carecen de capacidad de pago y no están afiliados al régimen subsidiado. Del tamaño de esta población dependen las transferencias nacionales para salud a los municipios.

El Acuerdo 244 de 2003 del Consejo Nacional de Seguridad Social en Salud

*... determina los criterios para identificar, seleccionar y priorizar a los potenciales beneficiarios de los subsidios, el procedimiento de afiliación de beneficiarios, la operación regional de las Administradoras de Régimen Subsidiado y el proceso de contratación del aseguramiento.*

Este acuerdo sustituye una multiplicidad de normas dispersas sobre el régimen subsidiado y es el marco reglamentario básico para su operación.

En 2003 se inició, por parte del Departamento Nacional de Planeación, el programa de aplicación del llamado “nuevo” SISBEN que desarrolla las orientaciones del Documento Conpes. Las evaluaciones, no obstante, no parecen demostrar que se haya alcanzado un mayor cubrimiento en condiciones de equidad, por lo que se afirma que “el SISBEN actualmente es útil únicamente para asignar los relativamente escasos recursos del régimen subsidiado”<sup>117</sup>.

El sistema de afiliación está enfocado hacia la continuidad, pues tiende a mantener a los ya identificados y asegurados. La obligación del Estado implica la meta de cobertura universal, dentro de parámetros de equidad, lo cual requeriría la revisión del sistema de afiliación sobre todo cuando ésta tiende, como concluye el estudio mencionado, a la continuidad, no a la inclusión total. Las proyecciones en términos de cobertura –en relación con recursos disponibles– indican que entre el 2009 y el 2014, ésta se incremen-

---

117. Óscar Rodríguez Salazar (2002) *¿Ha mejorado el acceso en salud? Evolución de los procesos del régimen subsidiado*, Bogotá, CID, Vol. I, p. 171 a 228.

taría 2,% (de 29,1 a 31,6%) pero la población pobre no afiliada al sistema se reduciría de 37,4 a 3,2% en el período 2002-2008. Según los cálculos del estudio, en razón de la sostenibilidad financiera el avance hacia la meta de aseguramiento universal en condiciones de equidad entre pobres y no pobres es de largo plazo, a unos 2 años.

Los problemas en torno al SISBEN también han sido ventilados a través de la interposición de acciones de tutela en las que los reclamamos

*... se concentran en las dificultades para realizar las entrevistas, las deficiencias en las mismas y el prolongado lapso de tiempo transcurrido después de la entrevista sin que se haga efectivo el acceso a los servicios. En algunos casos se ha ordenado que los enfermos graves o algunos sujetos de especial protección sean vinculados inmediatamente al régimen subsidiado. En otros eventos, se ha ordenado que el SISBEN agilice la encuesta y/o la inclusión del afectado en la lista de candidatos que esperan su afiliación*<sup>118</sup>.

Estas dificultades para la ampliación de la cobertura muestran los resultados mixtos que se han logrado en este campo, pues si bien el aseguramiento ha aumentado y se han reducido las inequidades, sin embargo no se ha logrado el aseguramiento universal y subsisten profundas desigualdades. El siguiente cuadro sintetiza ambos aspectos en relación con uno de los factores usuales de inequidad –la capacidad económica–, pues muestra los niveles de afiliación por quintiles de ingreso entre 199 y 200. Igualmente calcula la relación entre el quintil (20% con mayor ingreso) y el quintil 1 (20% con menor ingreso).

|                       | Niveles de afiliación (en %) por quintil de ingreso |            |            |
|-----------------------|-----------------------------------------------------|------------|------------|
|                       | 1995                                                | 2000       | 2005       |
| Quintiles             |                                                     |            |            |
| q-1                   | 2,9                                                 | 50,4       | 56,7       |
| q-2                   | 12,3                                                | 48,7       | 60,3       |
| q-3                   | 26,6                                                | 56,4       | 65,5       |
| q-4                   | 44,7                                                | 65         | 72,4       |
| q-5                   | 61,1                                                | 70,2       | 85,7       |
| Total                 | 29,1                                                | 58,1       | 68,1       |
| <b>Relación q5/q1</b> | <b>21,2</b>                                         | <b>1,4</b> | <b>1,5</b> |

Fuente: Datos de encuestas Demografía y Salud. Ver Carmen Elisa Flórez y Victoria Eugenia Soto (2007). “Evolución de la equidad en el acceso a los servicios y estado de salud de la población colombiana 1990-200” en VV. AA. *Avances y desafíos de la equidad en el sistema de salud colombiano*. Bogotá, DNP, Fundación Corona, Universidad de los Andes y Universidad del Rosario, Cuadro 2.

118. Óscar Parra. Ob. cit., p. 173 a 174.

Este cuadro muestra entonces que el nivel de aseguramiento creció considerablemente, pues pasó de 29% a 68% en estos 10 años, y que las inequidades se redujeron, gracias a que creció más rápidamente el aseguramiento de los sectores más pobres. Son resultados muy importantes. Sin embargo, subsisten problemas graves pues de todos modos más del 30% de la población no está asegurada y esa proporción es sensiblemente mayor en los sectores más pobres, en los que alcanza el 43%, mientras que en el quintil más rico es de 14,3%, una diferencia de casi 30 puntos. Igualmente, aunque se han reducido, también subsisten desigualdades en cobertura entre la ciudad y el campo y entre distintas regiones. Por ejemplo, en 2003, la diferencia en cobertura en aseguramiento entre el campo y la ciudad era de 13 puntos; y en ese mismo año, mientras que San Andrés y Providencia tenía un aseguramiento alto (84%), en la Costa Pacífica éste era de 2% <sup>119</sup>. Esto muestra la importancia de mirar el tema de la inequidad del sistema de salud colombiano y contar con estadísticas desagregadas por poblaciones vulnerables y zonas geográficas, con el fin de determinar el impacto diferenciado de las políticas de salud.

#### 2.4.4. *Otros indicadores de accesibilidad: las barreras de acceso a la salud*

La mayor parte de las investigaciones concluye que el aseguramiento tiende a favorecer el acceso efectivo a los servicios de salud, pues en general quienes están en el régimen contributivo son quienes usan más los servicios de salud, seguidos por quienes hacen parte del régimen subsidiado y por último, figuran los vinculados. Así, mientras 82% de quienes se sienten enfermos en el contributivo acuden a un servicio médico, ese porcentaje es de 68% en el subsidiado y 2% entre los vinculados <sup>120</sup>. Esto significa que el aseguramiento parece ser una estrategia adecuada para favorecer el acceso efectivo a los servicios de salud. A pesar de ello los usuarios del sistema de salud colombiano frecuentemente encuentran barreras de tipo económico, geográfico o administrativo para poder acceder a su derecho<sup>121</sup>. Esas barreras implican no sólo una afectación al derecho a la salud, sino además discriminaciones importantes pues no afectan de la misma manera a todas las personas, y lo cierto es que no ha habido mejoramientos significativos en los últimos años ni en la equidad, ni en la superación de esas barreras.

El siguiente cuadro ilustra la persistencia de esas barreras e inequidades pues muestra los niveles de atención profesional en salud para personas que se han sentido enfermas. La información está desagregada por uno de los factores usuales de discriminación, que es la capacidad económica, por lo cual el acceso a los servicios profesionales está clasificado por quintiles de ingreso entre 2000 y 200. Igualmente se calcula la relación entre el quintil (20% con mayor ingreso) y el quintil 1 (20% con menor ingreso).

119. Ver Adriana Rodríguez y Carlos Ramírez. *La garantía de la salud...* cit., p. 11.

120. Ver Carmen Elisa Flórez y Victoria Eugenia Soto. *Evolución de la equidad...* cit., p. 22.

121. Pruebas de ello son las constantes negativas de servicios que enfrentan los usuarios, al punto que les toca quejarse o interponer acción de tutela. Esto se ilustrará más ampliamente en la segunda parte del presente estudio.

| <i>Niveles de atención profesional en salud<br/>(%) por quintil de ingreso</i> |             |             |
|--------------------------------------------------------------------------------|-------------|-------------|
| Quintiles                                                                      | 2000        | 2005        |
| q-1                                                                            | 51,5        | 52,8        |
| q-2                                                                            | 60,5        | 65,8        |
| q-3                                                                            | 66,1        | 68,7        |
| q-4                                                                            | 74,3        | 71,2        |
| q-5                                                                            | 80,2        | 78,3        |
| Total                                                                          | 65,9        | 67,5        |
| <b>Relación q5/q1</b>                                                          | <b>1,56</b> | <b>1,48</b> |

Fuente: Carmen Elisa Flórez y Victoria Eugenia Soto. *Evolución de la equidad...* cit., Cuadro No. 4

Este cuadro muestra con claridad que la capacidad económica es un factor evidente de discriminación en el acceso a los servicios de salud, sin que haya habido mejoramientos significativos en los últimos años. Otros problemas relacionados con los niveles de afiliación y cobertura por procedencia geográfica y diferenciación entre el campo y la ciudad muestran debilidades en el acceso, lo que se constata al ver que los niveles más bajos de acceso se concentran en los departamentos más alejados o de menor desarrollo económico y las diferencias en la afiliación para la población rural y urbana son significativas.

#### **2.4.5. Los problemas de calidad y aceptabilidad en el derecho a la salud.** *Las percepciones de los usuarios sobre la calidad de los servicios*

La medición de la calidad en materia de salud no es un asunto pacífico pues la definición de qué se entiende por calidad de una prestación médica es polémica. Sin embargo, un indicador sustituto, que podría ilustrar sobre la calidad de las prestaciones médicas, puede ser el de las percepciones de los usuarios y su nivel de satisfacción. Es obviamente un indicador aproximado puesto que, por las propias asimetrías de información en el mercado de la salud, un usuario es un evaluador muy imperfecto de la calidad de un acto médico. Pero es en todo caso una medida útil, no sólo como aproximación a la calidad del servicio sino además porque de todas maneras es importante conocer la satisfacción del usuario, ya que ésta también sugiere pistas sobre la aceptabilidad misma de los servicios médicos por las personas.

Ahora bien, según los datos de la Encuesta de Calidad de Vida 2003, hay grados importantes de insatisfacción de los usuarios respecto a la calidad de los servicios de salud en Colombia. En efecto, en ese año, y sin que haya diferencias regionales ni por tipo de afiliación importantes, el 77,8% de las personas que usaron los servicios de salud lo consideraron de buena calidad, mientras que 16,% lo consideraron regular y ,7% francamente malo<sup>122</sup>. Algunos podrían considerar que hay un nivel de satisfacción alto, pues es

122. Citado por Adriana Rodríguez y Carlos Ramírez. *La garantía de la salud...* cit., p. 131.

cercano al 80%, pero la otra lectura legítima es que al menos uno de cada cinco usuarios del servicio de salud se encuentra insatisfecho con el servicio. Y se trata de las personas que efectivamente lograron la atención médica para su enfermedad, lo cual hace aún más significativa esa percepción negativa de ese grupo considerable de usuarios.

De otro lado, la percepción negativa y la insatisfacción sobre el servicio de salud ha tendido a incrementarse en los últimos años, como lo muestra el análisis de las razones por las cuales las personas enfermas no acudieron al servicio de salud. Mientras que en el año 2000, sólo 10,1% de los enfermos que no acudieron a los servicios médicos invocaron como razón del no uso del servicio su mala calidad, ese porcentaje se incrementó a 22,4% en 200<sup>123</sup>.

#### 2.4.6. Los indicadores de resultado o de goce del derecho a la salud. Avances e inequidades en el estado de salud de los colombianos

Para completar nuestro balance del sistema de salud, conviene presentar algunos indicadores de resultado o de goce efectivo del derecho, en relación no sólo con el acceso a los servicios de salud frente a la enfermedad, enfatizado en los puntos anteriores, sino con el estado de salud de los colombianos. En este aspecto, los resultados distan de ser satisfactorios, pues aunque hay mejorías importantes de ciertos indicadores, las inequidades persisten y hay incluso retroceso en ciertos aspectos muy sensibles.

Para ilustrar el estado de salud de la población colombiana, utilizaremos entonces dos indicadores usuales.

El primero es el estado de desnutrición de los niños menores de años, que es un indicador de la satisfacción del derecho a la alimentación, pero también considerado un

| Niveles de desnutrición crónica<br>(%) por quintil de ingreso |             |             |             |
|---------------------------------------------------------------|-------------|-------------|-------------|
| Quintiles                                                     | 1995        | 2000        | 2005        |
| q-1                                                           | 21,2        | 19,6        | 16,9        |
| q-2                                                           | 15          | 14,6        | 10,8        |
| q-3                                                           | 12          | 10,3        | 8,1         |
| q-4                                                           | 6,2         | 6,6         | 5,3         |
| q-5                                                           | 5,1         | 4,4         | 2,1         |
| Total                                                         | 13,1        | 12,1        | 9,9         |
| <b>Relación q1/q5</b>                                         | <b>4,16</b> | <b>4,47</b> | <b>8,04</b> |

Fuente: Carmen Elisa Flórez y Victoria Eugenia Soto. *Evolución de la equidad...* cit., Cuadro No. 16.

123. Ver Carmen Elisa Flórez y Victoria Eugenia Soto. *Evolución de la equidad...* cit., p. 21.

indicador de salud, pues la alimentación adecuada es claramente uno de los factores determinantes del estado de salud de la población. El cuadro “Niveles de desnutrición crónica (%) por quintil de ingreso” ilustra la evolución de la llamada desnutrición crónica, que es medida por el porcentaje de niños que tienen una talla menor de la que le corresponde a su edad. La información está desagregada por uno de los factores usuales de discriminación, que es la capacidad económica, por lo cual la desnutrición crónica está clasificada por quintiles de ingreso entre 199 y 200. Igualmente se calcula la relación entre el quintil (20% con mayor ingreso) y el quintil 1 (20% con menor ingreso ).

Este cuadro muestra que, a pesar de una cierta mejoría, los niveles generales de desnutrición crónica siguen siendo altos pero, peor aún, los niveles de equidad en este campo se han deteriorado pues la relación entre el quintil más alto y el más bajo pasó de 4 veces en 199 a 8 veces en 200. Esto significa que el porcentaje de desnutridos en el quintil más pobre es 8 veces mayor que en el quintil de mayores ingresos.

El segundo indicador es la tasa de mortalidad infantil, considerada como una medida que ilustra en forma dramática el estado de salud general de una población. El cuadro “Tasa de mortalidad infantil por quintil de ingreso” muestra la evolución de la mortalidad infantil, medida por una tasa que equivale al número de niños que mueren por cada mil nacidos vivos. La información está desagregada por uno de los factores usuales de discriminación, que es la capacidad económica, por lo cual la tasa de mortalidad está clasificada por quintiles de ingreso entre 199 y 200. Igualmente se calcula la relación entre el quintil (20% con mayor ingreso) y el quintil 1 (20% con menor ingreso)

| <i>Tasa de mortalidad infantil<br/>por quintil de ingreso</i> |            |            |            |
|---------------------------------------------------------------|------------|------------|------------|
| Quintiles                                                     | 1995       | 2000       | 2005       |
| q-1                                                           | 42         | 32,7       | 32,3       |
| q-2                                                           | 31,8       | 32,3       | 24,3       |
| q-3                                                           | 26,8       | 22         | 20,6       |
| q-4                                                           | 22,2       | 12,1       | 14,3       |
| q-5                                                           | 16,6       | 17,6       | 14,8       |
| Total                                                         | 31,3       | 24,8       | 22,3       |
| <b>Relación q1/q5</b>                                         | <b>2,5</b> | <b>1,9</b> | <b>2,2</b> |

Fuente: Carmen Elisa Flórez y Victoria Eugenia Soto. *Evolución de la equidad... cit., Cuadro No. 15*

Este cuadro también indica que a pesar de las mejorías en la tasa de mortalidad infantil, en la sociedad colombiana subsisten inequidades profundas en este campo. En efecto, la tasa de mortalidad en el quintil de menores ingresos sigue siendo más de dos veces mayor que aquella que presentan los niños de los estratos de mayores ingresos.

## 2.5. El control, ¿la respuesta a los problemas o un problema más?

Los problemas anteriormente enunciados son apenas algunos de los desafíos a los que hasta el momento la reforma en salud no ha logrado responder adecuadamente; sin embargo parecen suficientes para concluir que a pesar de avances en algunos ámbitos y del incremento en los esfuerzos de gasto público en este campo, el sistema de salud adoptado por la Ley 100 de 1993, y desarrollado por normas posteriores, no ha logrado realizar el derecho de todas las personas al más alto nivel de salud física y mental. Subsisten problemas de acceso, calidad y universalidad y en especial el sistema sigue siendo profundamente inequitativo. Además, ha habido estancamientos y retrocesos, en especial en el campo de la salud pública.

Ahora bien, en el diseño original, el modelo de mercado era el llamado a corregir las deficiencias del antiguo sistema gracias a los mecanismos de competencia y a la fuerte regulación. Pero si el funcionamiento del sistema presenta tantos problemas y desfases con las promesas hechas, habría que preguntarse qué falló. Una posibilidad es indagar por las posibilidades efectivas de que un modelo basado en la lógica de mercado garantice derechos sociales, incluso tratándose de un mercado regulado. Diversos estudios han abordado esa discusión, con respuestas discrepantes. Pero quizás un poco menos, los análisis se han preocupado por escudriñar en detalle el componente de regulación y control, que era un supuesto necesario para que el modelo planteado pudiera, al menos en teoría, cumplir con el objetivo de satisfacción del derecho<sup>124</sup>.

Por supuesto resulta claro que muchos de los problemas del sistema de salud y en especial aquellos que de manera más directa afectan la garantía del derecho no se derivan necesariamente de las falencias en los dispositivos de regulación y control, pero siendo éste un elemento fundamental en la concepción subyacente al esquema planteado y finalmente adoptado, vale la pena mirar en detalle su funcionamiento y a partir de allí explorar posibles respuestas y salidas a la crisis de la salud y avanzar más rápidamente hacia la observancia plena del derecho.

Previamente hay que aclarar que el tema del control en general y en particular el del sistema de salud es muy amplio, ya que un estudio completo comprendería tanto los mecanismos institucionales como las dinámicas de control social. No obstante, el abordaje que aquí se propone y se adopta como opción metodológica es institucional, para lo cual se miran la estructura y los agentes encargados del control, propios del sistema de salud, y los de algunos de los agentes externos que concurren en dicha labor, particularmente los órganos del Ministerio Público (Procuraduría General de la Nación, Defensoría del Pueblo y Personerías) no sólo por la cercanía que dichas instancias tienen con la

124. El tema de la regulación y control ha sido abordado en el estudio sobre la regulación en el sistema de salud colombiano contratado por el Ministerio de Salud con la Universidad de Harvard (1996); en el estudio de Herrera V y Cortes A.E. (2000). *Análisis de la descentralización de la política social y la municipalización del sistema general de seguridad social en salud en municipios de categoría 4, 5 y 6*. ESAP-CIMAP, Bogotá; en el de Bitrán & Asociados, *Econometría y Esap* (2002). *Evaluación y reestructuración de los procesos, estrategias y organismos públicos y privados encargados de la afiliación, pago y recaudo de aportes al sistema* y en el estudio de Óscar Rodríguez (2002). *Los avatares del servicio de salud para pobres*. Centro de Investigaciones para el Desarrollo, Universidad Nacional de Colombia, Programa de Apoyo a la Reforma, Tomo II, Bogotá.

ciudadanía en general sino porque precisamente a ellos la Constitución les ha confiado la vigilancia de la realización de los derechos humanos.

De otro lado es pertinente indicar que tanto en la definición de los alcances de las obligaciones internacionales, como en los desarrollos a nivel nacional, la importancia de la vigilancia y control en el sector salud ha sido especialmente resaltada. Así, conforme a la Observación General No. 14, se considera que constituye una violación de las obligaciones de proteger, la no adopción de las medidas necesarias para amparar a las personas frente a las violaciones del derecho a la salud por parte de terceros y se incluyen en esta categoría por parte del Comité omisiones como

*... la no regulación de las actividades de particulares, grupos o empresas con objeto de impedir que esos particulares, grupos o empresas violen el derecho a la salud de los demás; la no protección de los consumidores y los trabajadores contra las prácticas perjudiciales para la salud, como ocurre en el caso de algunos empleadores y fabricantes de medicamentos o alimentos; el no disuadir la producción, la comercialización y el consumo de tabaco, estupefacientes y otras sustancias nocivas; el no proteger a las mujeres contra la violencia, y el no procesar a los autores de la misma; el no disuadir la observancia continua de prácticas médicas o culturales tradicionales perjudiciales; y el no promulgar o hacer cumplir las leyes a fin de impedir la contaminación del agua, el aire y el suelo por las industrias extractivas y manufactureras* <sup>125</sup>.

Así mismo, se concibe como una violación a las obligaciones de cumplir, el que los Estados Partes no adopten todas las medidas necesarias para dar efectividad al derecho a la salud y entre ellas “la no vigilancia del ejercicio del derecho a la salud en el plano nacional, por ejemplo mediante la elaboración y aplicación de indicadores y bases de referencia”<sup>126</sup>.

En la misma línea, la Corte Constitucional ha destacado que “una adecuada regulación, así como un efectivo control y vigilancia del sector salud, es un prerrequisito de una correcta prestación del servicio y garantía del goce efectivo de los derechos de afiliados y beneficiarios”<sup>127</sup> y que la inspección, vigilancia y control sobre el servicio público de salud se justifica precisamente por el deber de intervenir para racionalizar el servicio y defender intereses superiores de la colectividad<sup>128</sup>.

---

12. Observación General No. 14, párrafo 1.

126. Observación General No. 14, párrafo 2.

127. Ver sentencia T-344 de 2002, M.P. Manuel José Cepeda Espinosa.

128. Ver sentencia C-974 de 2002, M.P. Rodrigo Escobar Gil.

## SEGUNDA PARTE

### El sistema de inspección, vigilancia y control y el derecho humano a la salud

La segunda parte de este informe desarrolla el aspecto central que se ha querido destacar en este estudio, que es el sistema de inspección, vigilancia y control del Sistema General de Seguridad Social en Salud y su incidencia en la garantía efectiva de este derecho. Para este análisis, en primer lugar, en el capítulo 3, se realiza una reinterpretación de la estructura general del modelo de salud a la luz de la teoría de los sistemas, que permite ubicar y redimensionar el subsistema de vigilancia y control y ofrecer una descripción de su composición, para seguidamente realizar un análisis detallado del funcionamiento de dos de sus elementos. Por una parte, en el componente de control administrativo, constituido básicamente por la atención y trámite de quejas en salud que realizan los diversos organismos encargados de esta labor al interior del sistema de salud, labor que es acompañada y complementada por el ejercicio de las funciones propias de los órganos de control del Estado pertenecientes al Ministerio Público. Este punto es estudiado en el capítulo 4. Por otra parte, el capítulo estudia el componente de control judicial, que tiene lugar principalmente a partir de la interposición de acciones de tutela por diversos aspectos relacionados con el derecho a la salud, control éste que se ha constituido en una alternativa para lograr el goce efectivo del derecho.



## CAPÍTULO 3

### El modelo del SGSSS a la luz de la teoría de sistemas

El Estado colombiano ha avanzado en la adopción de medidas para garantizar el acceso de la población al servicio de salud. Pero la compatibilidad del modelo de atención en salud con los estándares internacionales relacionados con el derecho a la salud y el fundamento filosófico que subyace en nuestra Constitución Política, en algunos aspectos, no parecen ser nítidos ni bien definidos. Internacionalmente, las responsabilidades del Estado en el campo de la salud no pueden reducirse a la selección de un modelo de atención que garantice el acceso a la población en condiciones de igualdad y calidad. Además, el Estado debe garantizar que la población disfrute de los niveles más altos de bienestar físico, mental y social, según lo definido por el Protocolo de San Salvador<sup>129</sup>.

Así, el papel que desempeña en la garantía del derecho el subsistema de inspección, vigilancia y control (IVC) es indiscutible. El Sistema General de Seguridad Social en Salud (SGSSS) colombiano fue diseñado con el propósito de resolver las problemáticas de cobertura, inequidad, ineficiencia, baja capacidad resolutive y administración deficiente de las instituciones de salud. Después de quince años de funcionamiento, la proliferación de quejas, tutelas, sanciones y las continuas reformas de los componentes estructurales del SGSSS nos comprueban que éste no ha logrado cumplir con la finalidad que originó su creación.

El modelo de sistema de atención en salud escogido por el Estado delega la función de la administración y la prestación de los servicios a terceros (instituciones públicas, privadas o mixtas), los cuales deben regir sus actuaciones teniendo en cuenta los parámetros establecidos para lograr una competencia regulada y el equilibrio financiero del sistema. En consecuencia y de acuerdo con este modelo, la actuación del Estado debe centrarse en garantizar que el comportamiento de las instituciones relacionadas con la atención en salud se inscriba dentro de los parámetros establecidos por él. Por lo tanto, el subsistema de IVC debe reclamar los correctivos para las fallas en la prestación del servicio y para lograr que el derecho a la salud sea efectivamente garantizado.

---

129. Artículo 10. Protocolo Adicional a la Convención Americana sobre Derechos Humanos en Materia de Derechos Económicos, Sociales y Culturales (Protocolo de San Salvador).

El capítulo 3 del estudio analiza el marco teórico y práctico dentro del cual fue concebido el modelo de Sistema General de Seguridad Social en Salud, y la configuración del subsistema de inspección, vigilancia y control que éste prevé, para garantizar que la población goce del más alto nivel de bienestar físico, mental y social, a la luz de los estándares internacionales en la materia y la teoría de los sistemas.

### 3.1. Los sistemas mecánicos

Los indiscutibles éxitos obtenidos por el paradigma científico moderno, especialmente en el campo de la ingeniería, fueron posibles por la combinación de las teorías de modelos ideales, cibernética de primer orden y sistemas mecánicos, con aquel principio de la filosofía estructuralista que propone reducir la solución de un problema a su descomposición en un conjunto de unidades mínimas (átomos) y unas reglas esenciales (leyes). La reducción y fragmentación de los problemas y la construcción de modelos ideales de sistemas, con funcionamiento mecánico, son los principios de organización que configuran el paradigma científico moderno.

Las máquinas triviales generadas por la articulación de la cibernética con la teoría general de sistemas son teleológicas, causales, predecibles, controlables y deterministas. La finalidad de las máquinas triviales es asignada por el diseñador. Cuando se plantea un artefacto de este tipo, él debe contener dispositivos de regulación y control que garanticen su funcionamiento. Si los dispositivos no cumplen con su función de regulación y control se deben tomar las medidas correctivas necesarias. Estos parámetros, conceptuales y prácticos, fueron transferidos y utilizados por los investigadores en los diferentes campos de las ciencias naturales, humanas y sociales<sup>130</sup>.

La identificación de los problemas de salud y el tipo de sistema mecánico seleccionado en Colombia para resolverlos es consistente con los fundamentos, teóricos y prácticos, que constituyen el paradigma científico moderno. Los responsables del diseño del SGSSS redujeron la complejidad de la problemática de salud, a los conflictos económicos, financieros y administrativos que generaba el sistema tradicional de atención en salud de naturaleza pública. Basándose en estos presupuestos procedieron a construir un sistema de atención en salud que permitiera la participación de múltiples agentes económicos (públicos, privados y mixtos) y que tuviera los dispositivos de regulación y control necesarios para lograr conservar el equilibrio financiero global del sistema en un contexto de mercado competitivo.

*Los ministerios de salud deberían apartarse gradualmente de la prestación directa de servicios para encargarse de la modulación (regulación) estratégica del sistema [...] Con el fin de incrementar la cobertura y la calidad, los sistemas de salud modernos deben hacer frente a dos retos financieros clave, a saber, la movilización de los recursos requeridos y la contención de los costos [...] El diseño del financiamiento, como algo dife -*

---

130. Ver Zygmunt Bauman (2002). *En busca de la política*, Fondo de Cultura Económica, México.

*renciado de su operación es una parte importante de la modulación [...] El primer paso en este proceso es la captación de dinero por parte de las agencias financieras, así como la acumulación de ese dinero en fondos* <sup>131</sup>.

La descentralización del gasto, la competencia regulada, y la transición del subsidio de la oferta a la demanda, fueron los ejes regulativos globales del nuevo Sistema General de Seguridad Social en Salud (SGSSS). El subsistema de Inspección, Vigilancia y Control se distribuye entre los componentes y partes del sistema para seleccionar y procesar la información necesaria que permita cumplir con los objetivos regulatorios globales asignados para el sistema.

Desde esta concepción que enfatiza los aspectos económicos, financieros y administrativos del sistema, los diferentes agentes del SGSSS deben tener la información completa indispensable para tomar decisiones sustentadas en una racionalidad de competencia. El patrón de organización seleccionado, que determina la estructura del SGSSS y delimita sus procesos de aprendizaje, está orientado hacia la búsqueda de eficiencia. La cobertura de la población, calidad y tipo de prestación del servicio de salud dependen de la eficiencia económica, financiera y administrativa del SGSSS lograda por las decisiones racionales, autónomas, independientes y perfectas que tomen las partes y componentes del sistema. El diseño ideal y mecánico del SGSSS no considera indispensable la presencia de externalidades, cambios biológicos, económicos, sociales e individuales contingentes, que pueden afectar el funcionamiento del mismo.

La Ley 100 de 1993<sup>132</sup> estableció que el SGSSS estaría compuesto por cuatro partes básicas denominadas: organismos de Dirección, Vigilancia y Control (constituida por tres componentes: Ministerio de Salud y Trabajo hoy –Protección Social–, Consejo Nacional de Seguridad Social en Salud –hoy Comisión de Regulación en Salud– y la Superintendencia Nacional en Salud); organismos de Financiación y Administración (constituidos por cinco componentes: Entidades Promotoras de Salud, Direcciones Seccionales, Distritales y Locales de Salud, Fondo de Solidaridad y Garantía); las Entidades Prestadoras de Servicios de Salud públicas, mixtas o privadas (constituidas por dos componentes: Instituciones Prestadoras de Salud, Empresas Sociales del Estado); y los afiliados, beneficiarios y Comités de Participación Comunitaria –COPACOS–.

El tipo de relación que tienen las cuatro partes del SGSSS fue definido por unas reglas de interacción específicas (algoritmos funcionales) que permiten seleccionar y procesar la información, interna y externa, relevante para asegurar la certeza en sus elecciones, decisiones y acciones locales. Para lograrlo y garantizar que la actuación de los agentes no se desvíe del marco regulatorio, se le asignaron a los diferentes componentes, de las partes, unas funciones específicas de inspección, vigilancia y control (Ver Gráfico 1).

131. Los aspectos ideológicos modernos que orientaron el diseño del SGSSS están formalmente consignados y ampliamente expuestos en el artículo de Juan Luis Londoño y Julio Frenk (1997). Ob. cit.

132. Ley 100 de 1993, Libro II.

Grafico 1. Las partes y componentes del SGSSS

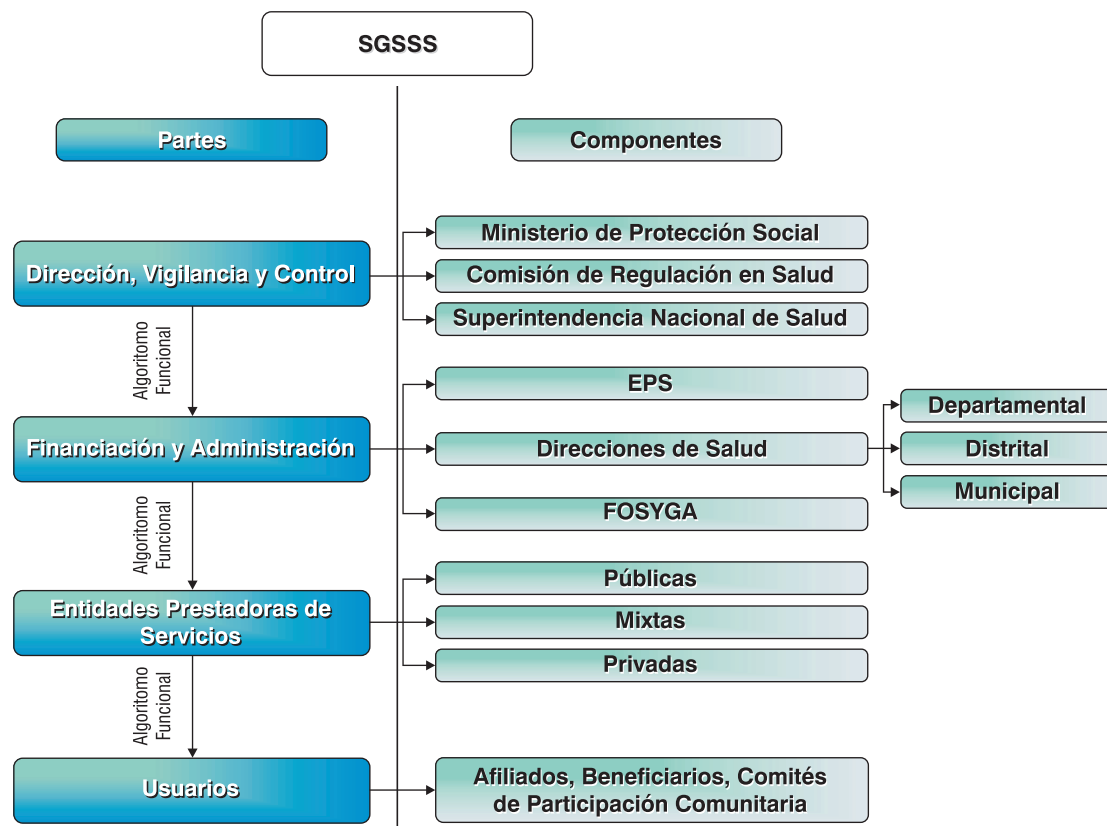

Se configura así un subsistema de IVC de naturaleza reactiva, que está compuesto por unos dispositivos locales de selección de información que es transmitida a un proceso local de toma de decisiones fijo, que convierte la información en una respuesta a la situación. Las relaciones lineales y causales entre las partes y componentes del sistema enfatizan los aspectos económicos, financieros y administrativos de las coordinaciones entre ellos. Este tipo de interacción es indispensable para corregir las desviaciones del sistema en aspectos específicos.

El patrón de organización económica, la estructura jerárquica piramidal de organización, los reducidos procesos de aprendizaje y los dispositivos reactivos del subsistema de inspección, vigilancia y control del SGSSS colombiano lo delimitan como un mecanismo cibernético de primer orden<sup>133</sup>. Esto quiere decir que el SGSSS fue concebido como una totalidad desarmable (máquina) compuesta por un conjunto de partes y relaciones. Las partes del sistema son intercambiables (reformas), tienen una jerarquía (piramidal) y unas funciones específicas de inspección, vigilancia y control que les permiten tener una identidad (estática) y una autonomía (absoluta)<sup>134</sup>.

133. Ver Heinz von Forester (1996). *Las semillas de la cibernética*, Gedisa, Barcelona.

134. Ver Elina Dabas y Denise Najmannovich (199). *Redes, el lenguaje de los vínculos*, Paidós, Buenos Aires.

Dentro de esta lógica, el subsistema de inspección, vigilancia y control del SGSSS fue distribuido entre las diferentes partes y componentes del sistema y está dirigido básicamente a recopilar y procesar la información, interna y externa, necesaria que garantizar el cumplimiento de la finalidad económica, financiera y administrativa del sistema. Además, el modelo ideal seleccionado presupone que las partes y componentes del SGSSS conocen la totalidad de las consecuencias de sus acciones.

En el SGSSS, las partes y sus componentes tienen un polo de entrada (receptor) y otro de salida (efectos) y dos mecanismos: uno que informa sobre el estado actual (sensor) y otro que compara el estado actual con el “ideal”. Este proceso de comparación permite corregir las desviaciones, lograr un funcionamiento adecuado y cumplir con la finalidad establecida previamente. Si el sistema no produce los resultados esperados se deben realizar correcciones en las partes, en las relaciones o en los dispositivos de regulación y control. Pero cambiar el patrón de organización (sentido) implicaría cambiar el sistema; por lo tanto, éste no debe ser modificado (Ver Gráfico 2).

Grafico 2. Sistema mecánico del modelo de salud

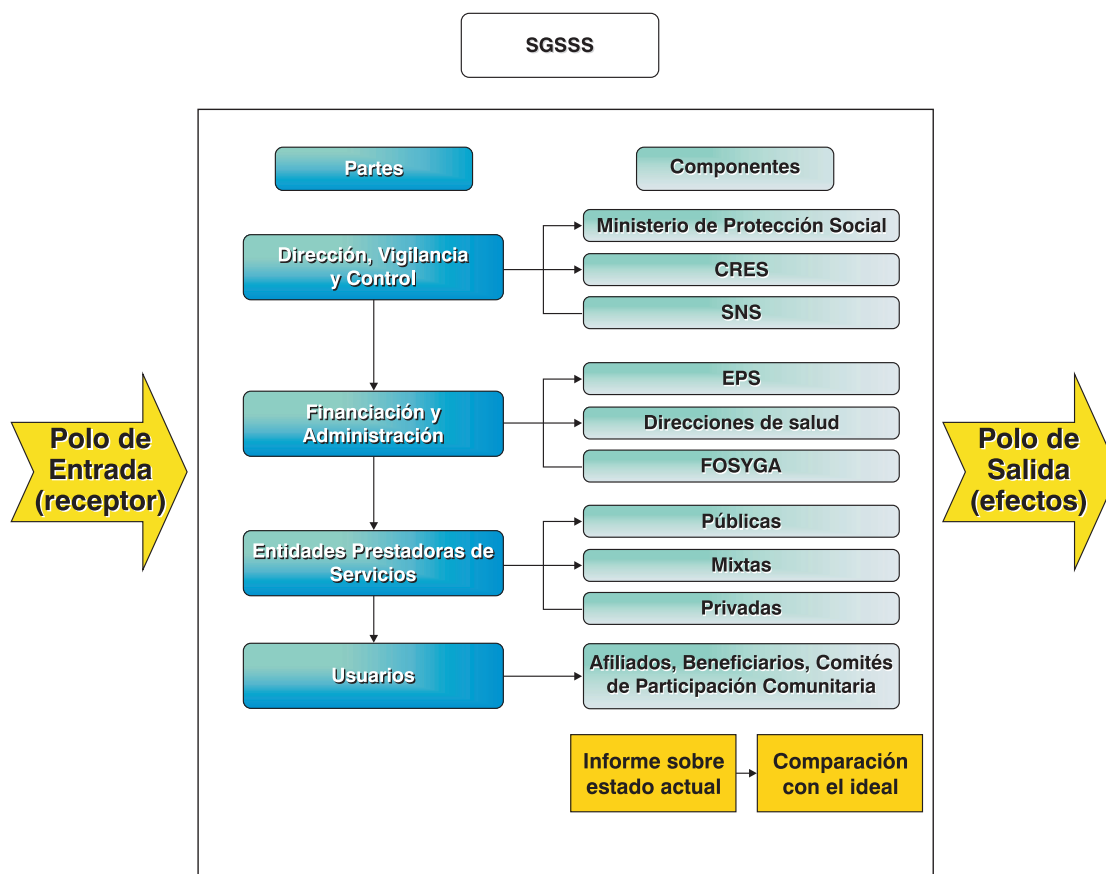

Las diferentes teorías relacionadas con el estudio de los sistemas y los dispositivos de regulación y control, coinciden en afirmar que los conflictos de funcionamiento, como los que ha venido presentando el SGSSS, están básicamente relacionados con el tipo de sistema (mecánico u orgánico) seleccionado y con las interacciones entre: el patrón de organización (sentido), las partes o relaciones (estructura), los procesos de aprendizaje, y los dispositivos de regulación y control que éstos posean<sup>13</sup>.

Con estos lineamientos conceptuales básicos, y con otros que se irán incorporando durante el desarrollo del documento, procederemos a realizar un estudio más detallado relacionado con el patrón de organización, estructura global del sistema, las partes y componentes y las correcciones introducidas con la última reforma. Dado el planteamiento respecto del papel que debe desempeñar la IVC dentro de un sistema como el SGSSS, se enfatizará en los aspectos vinculados con el subsistema de inspección, vigilancia y control que contiene el modelo.

### 3.2. El patrón de organización del SGSSS

Desde la óptica de los gestores de la reforma al Sistema de Seguridad Social en Salud, el sistema vigente hasta 1993 estaba generando múltiples problemas en los ámbitos de la población y de las instituciones de salud. En el ámbito de la población se identificaron problemas de rezago epidemiológico, inequidad, enfermedades no transmisibles, lesiones, infecciones emergentes, cambios en la demanda y presiones políticas. En el ámbito de las instituciones se identificaron problemas de cobertura insuficiente, calidad técnica pobre, ineficiencia en la asignación de recursos, inadecuados procesos de referencia de pacientes, baja capacidad resolutoria y administración deficiente de las instituciones, escalada de costos, incentivos inadecuados, inseguridad financiera, insatisfacción de los consumidores, expansión tecnológica y gerencia deficiente del sistema<sup>136</sup>.

En consecuencia, los problemas de salud, de acuerdo con los principios del paradigma moderno, fueron reducidos a dos: la naturaleza pública de la prestación de servicios de salud y la ineficiencia económica, financiera y administrativa del sistema. La solución para estos dos problemas sería el diseño de un SGSSS basado en el modelo de Pluralismo Estructurado<sup>137</sup>. De acuerdo con sus lineamientos, el SGSSS debe cumplir con los objetivos de regular la prestación de los servicios de salud y crear las condiciones para el acceso de toda la población a los diferentes niveles de atención.

De esta forma, “el seguro público de salud sufrió una desintegración vertical con la separación de las actividades de financiamiento y prestación de servicios. Se creó un mercado que lo articuló con el de servicios médicos, que también recibió un impulso para ampliar la oferta y mejorar la calidad. Esta reforma de los mercados de la salud se complementó

---

13. Ver Fritjof Capra (1998). *La trama de la vida*, Anagrama, Barcelona.

136. Julio Frenk y Juan Luis Londoño (1997). Ob. cit.

137. Ibíd. El pluralismo se concibe como la participación de entidades públicas, privadas o mixtas en la administración y prestación de los servicios de salud. El aspecto estructural se percibe como la asignación de reglas y funciones especializadas a las partes que componen el sistema.

con la descentralización territorial y, como se podía predecir desde la economía institucional, llevó a diseñar mecanismos de regulación para facilitar el desarrollo armónico de los mercados”<sup>138</sup>. El adecuado cumplimiento de las reglas del mercado competitivo y de las funciones especializadas de las partes y componentes del SGSSS permitirían, según el planteamiento teórico, conservar el equilibrio económico, financiero y administrativo del sistema.

Para que las partes y componentes del SGSSS tuvieran un adecuado funcionamiento se realizaron diferentes modificaciones en el entorno. La primera de ellas consistió en fragmentar la población colombiana discriminándola según la cantidad de ingresos que ellos posean. La segmentación de la población según la cantidad de ingresos posibilitó la creación de tres tipos de usuarios del SGSSS, que se llamaron: *contributivos* (personas que tengan empleos formales, servidores públicos, pensionados, jubilados e independientes con capacidad de pago); *subsidiados* (personas sin capacidad de pago para cubrir el monto total de la cotización) los cuales serían subsidiados por el SGSSS con aportes fiscales de la Nación, departamentos, distritos, municipios, FOSYGA y recursos de afiliados según su capacidad; y los *vinculados*, constituidos por aquellos ciudadanos colombianos que por incapacidad total de pago no pueden ser afiliados al sistema. La atención en salud de ellos y su financiación será de naturaleza pública y estará a cargo de los hospitales públicos.

Los diferentes dispositivos y mecanismos que tiene el subsistema de IVC del SGSSS deben transmitir la información económica a las diferentes partes y componentes del sistema de modo que les permita clasificar económicamente a la población usuaria en contributivos, subsidiados o vinculados. Además, para lograr conservar el equilibrio económico, financiero y administrativo, el diseño del SGSSS mantuvo los regímenes especiales (Fuerzas Militares, maestros, Ecopetrol) que introducen otro factor de segmentación, discriminación y exclusión de la población usuaria del SGSSS.

La discriminación económica de la población permitió la creación de diferentes tipos de Planes Obligatorios de Salud (POS contributivo y subsidiado) dirigidos a la atención individual de la salud y los Planes de Atención Básica (PAB) dirigidos a la atención de la salud pública de la población que por focalización demuestre tener los menores ingresos y las mayores necesidades. La cantidad y calidad de los servicios de salud incluidos en el POS y el PAB está determinada por la cantidad de recursos económicos, individuales o institucionales (FOSYGA) que logre acumular el SGSSS. Cada plan dispone de mecanismos de inspección, seguimiento y control que permiten la construcción de depósitos de información que garanticen conservar el equilibrio financiero del sistema.

El diseño del SGSSS establece dos dispositivos de control, creados para lograr la consolidación de un mercado competitivo en el campo de la salud. El POS –diferente para el régimen contributivo y subsidiado– actúa como dispositivo de control del ámbito de los servicios. La Unidad de Pago por Capitación (UPC) –diferente para el régimen contributi-

---

138. Jairo Humberto Restrepo Zea y Sandra Rodríguez Acosta (200). “Diseño y experiencia de la regulación en la salud en Colombia”. En *Revista de Economía Institucional*, Universidad Externado de Colombia, Volumen 7, Número 12, Primer semestre, p. 16.

vo y subsidiado– funciona como mecanismo de control en el campo de los precios. Según el diseño del SGSSS, estos dispositivos básicos de control permitirían la competencia efectiva entre las administradoras (EPS) y las prestadoras (IPS) de los servicios de salud.

Para recapitular, la clasificación de la población, discriminada por la cantidad de sus ingresos; el POS contributivo y subsidiado; y la UPC contributiva y subsidiada fueron concebidos también para actuar como dispositivos de control considerados como fundamentales para conservar el equilibrio económico, financiero y administrativo del sistema en un esquema de competencia regulada. La selección del tipo de estructura organizacional y el diseño del subsistema de inspección, vigilancia y control también se llevó a cabo para cumplir con la finalidad del sistema. El detalle de las características específicas de las partes y componentes que constituyen la estructura del sistema se expone a continuación.

### 3.3. La estructura global del SGSSS

La Ley 100 de 1993 determina que el SGSSS está compuesto por cuatro partes denominadas: Organismos de Dirección, Vigilancia y Control; Organismos de Financiación y Administración; prestación de los servicios de salud; y los afiliados, beneficiarios y Comités de Participación Comunitaria (Copacos). Las partes del sistema se organizan piramidalmente. La parte de dirección estratégica, regulación y control se ubica en la cima de la pirámide. Posteriormente, en un lugar intermedio de la pirámide, se localizan los responsables de la financiación del sistema (Fosyga - EPS) y la administración (EPS). Cercana a la base de la pirámide se encuentran las IPS y las ESE públicas, responsables de la prestación de los servicios de salud. En la base de la pirámide se localizan los usuarios del SGSSS.

Grafico 3. Subsistemas del modelo de SGSSS

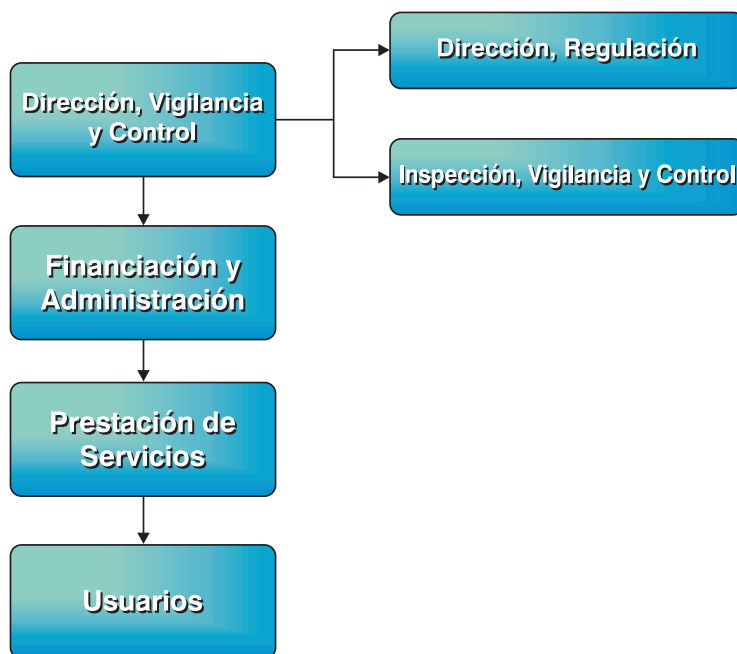

Las partes que constituyen el SGSSS (dirección, regulación y control; financiación, administración; prestación de servicios y usuarios) están compuestas, a su vez, por un conjunto mínimo de instituciones que actúan como responsables del cumplimiento efectivo de las funciones asignadas a ellas por los diseñadores del sistema. Para cumplir adecuadamente con sus funciones especializadas, las diferentes instituciones deben tener dispositivos internos de inspección, vigilancia y control.

Consideramos conveniente destacar que aunque la Ley 100 de 1993 incorpora a los usuarios como una parte formal del sistema, su participación estructural y funcional es tangencial y está directamente relacionada con los aspectos de financiación e indirectamente con la inspección, vigilancia y control.

La información recopilada por el subsistema de inspección, vigilancia y control (SIVC) del SGSSS respecto de las partes y componentes del sistema permitirá establecer si los usuarios están cumpliendo con las funciones asignadas a ellos por el SGSSS: pagar la cotización reglamentaria o subsidio (recursos fiscales, solidaridad, ingresos de entes territoriales); si están recibiendo el Plan Obligatorio de Salud (POS) que les corresponde y si éste tiene la cobertura familiar esperada. Además, el subsistema de IVC establece si los pagos compartidos, cuotas moderadoras y deducibles han sido útiles para racionalizar el uso de los servicios o complementar la financiación del POS.

De acuerdo con el diseño inicial, el subsistema de IVC del SGSSS debe proveer la información, cuantitativa y cualitativa, que permita establecer si los afiliados y beneficiarios han podido: elegir libremente la EPS, IPS y los profesionales adscritos; conformar alianzas y asociaciones de usuarios que los representen ante las EPS y las IPS. Otro aspecto relacionado con los reclamos de los usuarios que el subsistema de IVC debe controlar es la existencia de un Comité Técnico Científico en las EPS. Como se observará más adelante, la reforma al SGSSS, introducida por la Ley 1122 de 2007, busca corregir las disfunciones presentadas por el diseño inicial del subsistema de IVC.

El tipo de organización piramidal contenido en el diseño del SGSSS, busca centralizar las funciones de dirección, regulación y control del SGSSS en las instituciones gubernamentales. Este tipo de organización estructural piramidal se replica en los otros componentes (entidades e instituciones) que constituyen las cuatro partes esenciales del sistema<sup>139</sup>. En un modelo de sistema mecánico trivial, como el SGSSS colombiano, la organización piramidal y la concentración de las funciones tienen el propósito de lograr que las decisiones estratégicas que tomen las partes del sistema se lleven a cabo con la menor participación posible de otras partes y componentes del sistema. Los diseñadores de los sistemas mecánicos, como el SGSSS, consideran que la proliferación de centros de decisión en un mismo campo de acción genera demasiado ruido (proliferación de información irrelevante) que afecta negativamente el funcionamiento del sistema porque aumenta la incertidumbre. Por lo tanto en este tipo de sistemas mecánicos triviales, debe haber siempre alguna institución o entidad que “marque el paso” de las elecciones y decisiones estratégicas que se toman en los diferentes ámbitos de acción<sup>140</sup>.

139. Ver Ley 1122 de 2007 que reforma al SGSSS y profundiza, aún más, la concentración de la potestad de direccionamiento estratégico del sistema en la cima de la pirámide del SGSSS.

140. La predisposición humana a pensar en términos de “marcapasos” está expuesta detalladamente en: Steven Johnson (2003). *Sistemas emergentes*, Fondo de Cultura Económica, México.

El modelo de sistema mecánico que orientó el diseño inicial del SGSSS establece que, para lograr su funcionamiento adecuado, los componentes (entidades e instituciones) que constituyen las partes esenciales del sistema deben tener un máximo de cierre organizacional y una mínima apertura informacional. Para obtener un cierre organizacional máximo y una apertura informacional mínima, cada parte y componente del sistema debe tener unas funciones especializadas y unos dispositivos sensoriales que filtren la información que contribuya a conservar la parte o el componente tal como fue diseñado.

Las partes del SGSSS actúan como responsables del cumplimiento efectivo de las funciones que les han sido asignadas por los diseñadores del sistema. Para cumplir adecuadamente con sus funciones especializadas, cada parte debe tener dispositivos individuales de inspección, vigilancia y control. Lo mismo sucede con la estructura de los componentes (entidades e instituciones) que pertenecen a las diferentes partes del sistema. Esta similitud estructural y funcional de las partes y componentes que configuran el SGSSS permite mantener constante el equilibrio económico, financiero y administrativo del sistema, y cumplir así con la finalidad establecida para él durante su diseño.

Las relaciones internas del SGSSS se reducen a generar los flujos de información y comunicación necesarios para mantener estable cada una de las partes y componentes del sistema. Los procesos de aprendizaje que facilitan la adaptación en los sistemas mecánicos son mínimos, porque, en la mayoría de los casos, la adaptación del sistema a los cambios internos y externos obliga a producir modificaciones radicales en el patrón de organización y la organización estructural global del sistema<sup>141</sup>. La descripción de los aspectos funcionales del SGSSS se detalla a continuación.

### 3.4. Funciones de las partes del SGSSS

#### 3.4.1. Dirección y regulación

Los cambios en la concepción de las funciones estatales, introducidos por el denominado Consenso de Washington, redefinen la actuación del Estado colombiano para que ésta sea coherente con las tendencias mundiales. En consecuencia, según las orientaciones de la Constitución de 1991, el Estado no es necesariamente el responsable directo de la prestación de los servicios públicos, entre los cuales se encuentra la atención de la salud. El artículo 48<sup>142</sup> de la Constitución Política de Colombia determina que el Estado es el encargado de la dirección, coordinación y control del servicio público de la salud. Su función

*... consiste en la definición de los roles que deben desempeñar al interior del sistema los diferentes agentes que en él participan, estableciendo los objetivos que se buscan en el*

---

141. Dado el interés de esta investigación de enfocar su análisis hacia el tema de la inspección, vigilancia y control, la reflexión que se presenta a continuación sobre la estructura del SGSSS, hará una división analítica entre el nivel de dirección, regulación y control y un nivel de carácter más operativo que incluye los diferentes agentes y entidades relacionados con el proceso de financiación, aseguramiento y administración, y la prestación de servicios.

142. Art. 48. “La seguridad social es un servicio público de carácter obligatorio que se prestará bajo la coordinación, dirección y control del Estado, en sujeción a los principios de eficiencia, universalidad y solidaridad, en los términos que establezca la ley [...] El Estado con la participación de los particulares ampliará progresivamente la cobertura de la seguridad social que comprenderá la prestación de los servicios en la forma que determine la ley”.

*accionar de cada uno de ellos, de acuerdo con las funciones que se les quiere atribuir. Dicho en otras palabras, el diseño del sistema responde a la estructuración del mismo, definiendo los propósitos que debe desarrollar cada una de las funciones que existen al interior del mismo y las interrelaciones entre las mismas* <sup>143</sup>.

Esta función de dirección queda formalmente consignada en la Ley 100 de 1993, que define un nuevo modelo de prestación del servicio de salud.

Derivada de la función directiva se encuentra la función de regulación que se define como: “un proceso dirigido por los organismos reguladores que comprende el diseño y la fijación de normas, y de medidas para garantizar su aplicación, así como la fiscalización y el control”<sup>144</sup>. Los componentes (entidades e instituciones) responsables de la función de regulación según el diseño formal del SGSSS serían: el Consejo Nacional de Seguridad Social en Salud (institución creada por la Ley 100 de 1993 y recientemente reformada con la Ley 1122 de 2007<sup>14</sup>); el Gobierno Nacional, a través del Ministerio de Salud –hoy de Protección Social–, y la Superintendencia Nacional de Salud.

Las funciones especializadas de las instituciones reguladoras deben ser consistentes con el modelo de gestión y aseguramiento de riesgos en salud que tiene el SGSSS. Por lo tanto, las elecciones, decisiones y acciones de estas instituciones están dirigidas a cumplir con lo establecido por el patrón de organización económico, financiero y administrativo del sistema. Todas las instituciones que componen la parte de Dirección y Regulación deben tener un subsistema individual de IVC que permita obtener la información necesaria para cumplir con sus funciones especializadas.

La función especializada de dirección y regulación esta prioritariamente desempeñada por el Gobierno Nacional: “El Sistema General de Seguridad Social en Salud está bajo la orientación y regulación del Presidente de la República y del Ministerio de Salud”<sup>146</sup>. Esta última institución, el Ministerio de Protección Social, concentra las funciones especializadas en dos ámbitos. El primero es el ámbito de la dirección en el que: formula y adopta políticas, estrategias, programas y proyectos para el SGSSS; establece el régimen de estímulos, términos, controles y sanciones para garantizar la universalidad de la afi-

143. Ministerio de Protección Social - Proyecto de Apoyo a la Reforma en Salud. *Proyecto Evaluación y Reestructuración de los procesos, estrategias y organismos públicos y privados encargados de adelantar las funciones de inspección, vigilancia y control del Sistema de Salud. Informe final*. p. 498. Documento disponible en la página electrónica: [http://www.minproteccion-social.gov.co/pars/library/documents/DocNewsNo16194DocumentNo4266.PDF].

144. Ferreiro, citado en Restrepo y Zea. Ob. cit., p. 167.

14. En virtud del artículo 171 de la Ley 100 de 1993, la CNSSS está conformada por el Ministro de Protección Social, el Ministro de Hacienda y Crédito Público, representantes de entidades departamentales y municipales de salud, dos representantes de los empleadores, dos representantes de los trabajadores, el representante legal del ISS, un representante de las Empresas Prestadoras de Salud, un representante de las Instituciones Prestadoras de Servicios de Salud, un representante de los profesionales del área de la salud, un representante de las Asociaciones de Usuarios. Por su parte, la Ley 1122 de 2007 sustituye el CNSSS por la Comisión de Regulación en Salud (CRES) conformada a su vez por: el Ministro de Protección Social, el Ministro de Hacienda y Crédito Público, cinco comisionados expertos (designados por el Presidente de la República de ternas enviadas por la Asociación Colombiana de Universidades, Centros de Investigación en Salud, Centros de Investigación en Economía de la Salud, Asociaciones de Profesionales de la Salud y Asociaciones de Usuarios).

146. Artículo 170 de la Ley 100 de 1993.

liación. El segundo es el ámbito de regulación en el cual expide normas administrativas; regula la calidad de los servicios; y reglamenta la recolección, transferencia y difusión de la información<sup>147</sup>.

El segundo componente de la parte de dirección y regulación del SGSSS es el Consejo Nacional de Seguridad Social en Salud, cuyas funciones fueron modificadas por la Ley 1122 de 2007. Esta institución tiene asignadas funciones especializadas de regulación<sup>148</sup>: define y reglamenta los grupos de afiliación prioritaria al subsidio; determina los criterios para la utilización y distribución de los recursos en salud; establece criterios para determinar el valor de la Unidad de Pago por Capitación (UPC) y; determina el contenido y las actualizaciones de los servicios que contiene el Plan Obligatorio en Salud (POS) para el régimen contributivo y subsidiado. El cumplimiento de estas funciones depende de los recursos económicos acumulados que tenga el SGSSS.

El tercer componente que constituye la parte de la dirección y regulación del SGSSS es la Superintendencia Nacional de Salud. En el diseño inicial del sistema (1993), sus funciones especializadas fueron definidas como: inspección, vigilancia y control a las EPS y las IPS; verificación de la conformidad del POS por cada EPS y definición de un régimen sancionatorio<sup>149</sup>. Estas funciones originales fueron considerablemente ampliadas con la Ley 1122 de 2007 y posteriormente desarrolladas en el Decreto 1018 de 2007 que reorganizó la SNS. Para llevar a cabo sus funciones, la Superintendencia Nacional de Salud expide circulares de obligatorio cumplimiento para el universo de sus vigilados, razón por la cual se constituye en un eje adicional de regulación del sistema<sup>10</sup>.

---

147. De manera adicional a las funciones de dirección y regulación, y en virtud de lo establecido en el artículo 173 de la Ley 100, numeral 6, el Ministerio de Salud desempeña funciones en el ámbito de control: evalúa la eficiencia en la gestión y supervisa, vigila y controla todas las entidades exceptuando a la Superintendencia Nacional de Salud y; ejerce el control de los factores de riesgo. Las decisiones del Ministerio de la Protección Social son de obligatorio cumplimiento para las EPS, IPS y las direcciones seccionales, distritales y locales de salud.

148. Las funciones del CNSSS están definidas en la Ley 100 de 1993 en el artículo 172. Las nuevas funciones del organismo que sustituye las funciones del CNSSS, la Comisión de Regulación en Salud (CRES), están desarrolladas en el Artículo 7 de la Ley 1122 de 2007.

149. Ley 100/93, artículo 230.

10. Tal es la constatación que se puede realizar con el actual trabajo de elaboración de la Circular Única de la Superintendencia Nacional de Salud que busca a través de un acto administrativo compilar en un solo cuerpo normativo todas las instrucciones de la entidad que se encuentran vigentes, con los siguientes propósitos: “Recopilar, modificar y actualizar todas las Circulares Externas y Cartas Circulares expedidas por la Superintendencia Nacional de Salud; facilitar a los destinatarios de su misión de inspección, vigilancia y control, el cumplimiento, comprensión y consulta de las instrucciones expedidas por esta Superintendencia; proporcionar a sus funcionarios un instrumento jurídico unificado y coherente que determine con precisión las reglas aplicables a las situaciones concretas que se inscriben dentro de su ámbito de competencia. La Circular Única contiene en cada uno de los títulos que la componen las instrucciones y solicitudes de información dispuestas por la Superintendencia Nacional de Salud, las cuales serán de obligatorio cumplimiento para los sujetos vigilados”. Superintendencia Nacional de Salud, Circular Externa 047 del 30 de noviembre de 2007, p. 1.

Gráfico 4. Función especializada de Dirección, Regulación y Control

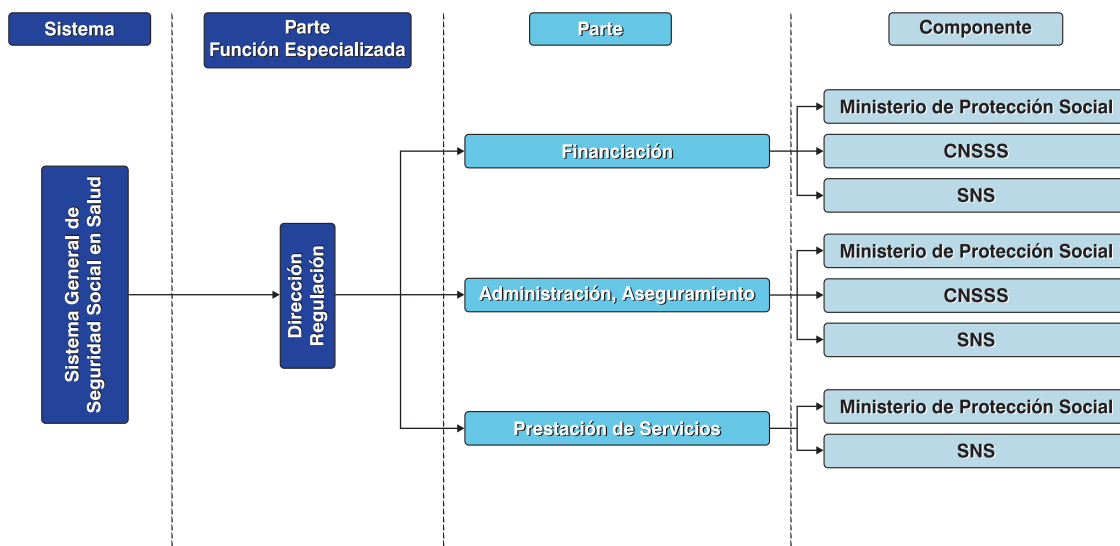

### 3.4.2. Funciones generales de Inspección, Vigilancia y Control

Como mencionamos anteriormente, el Estado colombiano se ha desvinculado progresivamente de la prestación directa del servicio de salud. Pero su función de diseñar un efectivo subsistema de inspección y vigilancia sigue vigente. Ésta es una obligación definida tanto por los estándares internacionales, como por la Constitución Política de Colombia que en su artículo 36 consagra: “Los servicios públicos [...] podrán ser prestados por el Estado directa o indirectamente, por comunidades organizadas, o por particulares. En todo caso, el Estado mantendrá la regulación, control y la vigilancia de dichos servicios”. El Estado colombiano, de acuerdo con el modelo de atención de salud elegido, debe crear las condiciones para su funcionamiento adecuado y construir los dispositivos de inspección, vigilancia y control necesarios para garantizar la libre concurrencia, libre elección y disponibilidad de información en el mercado.

En la Ley 100 de 1993, el legislador reconoce la importancia del control para el adecuado funcionamiento del SGSSS. Así, en su capítulo IV se delimitan las bases de lo que sería un subsistema IVC. En el texto se hace mención de las diferentes competencias que los agentes relacionados con el SGSSS deben tener para ejercer la función especializada de inspección, vigilancia y control. La Ley 10 de 1990, la Ley 60 de 1993 y la 71 de 2001 también contribuyen a definir los alcances de lo que se entenderá como funciones de inspección, vigilancia y control.

Las dificultades que el Programa de Apoyo para la Reforma en Salud (PARS) identifica en el funcionamiento de este subsistema en el Informe Final del “Proyecto Evaluación y Reestructuración de los Procesos, Estrategias y Organismos Públicos y Privados Encargados de Adelantar las Funciones de Vigilancia y Control del Sistema de Salud”, se sintetizan en: Ausencia de un organismo coordinador del subsistema, superposición de funciones entre los diferentes niveles de la administración, conflicto de intereses de algunos agentes

encargados de ejecutar acciones de IVC, limitaciones en la capacidad administrativa y técnica de llevar a cabo acciones de IVC de algunos de los agentes descentralizados<sup>11</sup>.

En consecuencia, la Ley 1122 de 2007, que reforma la Ley 100 de 1993, busca superar los problemas detectados y para ello define con mayor precisión los alcances del subsistema de inspección, vigilancia y control del SGSSS, especialmente en los aspectos relacionados con la financiación, la administración, el aseguramiento y la prestación de servicios. Esta ley define los alcances que tendrá el subsistema de IVC a partir de la fecha<sup>12</sup> en el SGSSS. Su coordinación, puesta en marcha y desarrollo estarán a cargo de la Superintendencia Nacional de Salud.

En virtud de su designación como la institución coordinadora del sistema IVC, la Superintendencia emprendió una reforma organizacional para asumir lo establecido por la ley<sup>13</sup>. Para la configuración del nuevo subsistema IVC, la ley precisa los conceptos de inspección, vigilancia y control de la siguiente manera:

*La inspección es el conjunto de actividades y acciones encaminadas al seguimiento, monitoreo y evaluación del Sistema General de Seguridad Social en Salud y que sirven para solicitar, **confirmar y analizar de manera puntual la información que se requiera sobre la situación de los servicios de salud y sus recursos**, sobre la situación jurídica, financiera, técnica-científica, administrativa y económica de las entidades sometidas a vigilancia de la Superintendencia Nacional de Salud dentro del ámbito de su competencia.*

*La vigilancia consiste en la atribución de la Superintendencia Nacional de Salud para advertir, prevenir, orientar, asistir y propender por que las entidades encargadas del financiamiento, aseguramiento, prestación del servicio de salud, atención al usuario, participación social y demás sujetos de vigilancia de la Superintendencia Nacional de Salud, **cumplan con las normas que regulan el Sistema General de Seguridad Social en Salud para el desarrollo de éste**.*

*El control consiste en la atribución de la Superintendencia Nacional de Salud para **ordenar los correctivos tendientes a la superación de la situación crítica o irregular (jurídica, financiera, económica, técnica, científica administrativa)** de cualquiera de sus vigilados y sancionar las actuaciones que se aparten del ordenamiento legal bien sea por acción o por omisión*<sup>14</sup>.

---

11. Ministerio de Protección Social - Programa de Apoyo a la Reforma de Salud - Ministerio de Protección Social. Proyecto Evaluación y Reestructuración de los Procesos, Estrategias y Organismos Públicos y Privados Encargados de Adelantar las Funciones de Vigilancia y Control del Sistema de Salud. Capítulo 3. Documento consultado en la página electrónica: [http://www.minproteccionsocial.gov.co/pars/library/documents/DocNewsNo16194DocumentNo4268.PDF].

12. Si bien la Ley 100 en su capítulo IV incluyó la labor de IVC como uno de los componentes del sistema, una de las razones que indujeron la reforma llevada a cabo por la Ley 1122 tiene que ver con la debilidad del sistema de IVC imperante hasta la fecha de la expedición y aprobación de la ley en mención.

13. A partir de la expedición de la Ley 1122 de 2007, la Superintendencia Nacional de Salud emprendió un trabajo de "revisión y análisis de las competencias y mecanismos con que contaba la entidad para el cabal desarrollo de las funciones asignadas durante años vía legislativa y reglamentaria, y establecer si las mismas respondían o no a las exigencias del sector; proceso que permitió determinar la existencia de un rezago en su capacidad operativa, en el alcance de sus facultades, así como la falta de unidad y coherencia en la inspección, vigilancia y control por parte de las autoridades responsables de su ejercicio". José Renán Trujillo García. "Informe Primer Año de Gestión. Septiembre 2006-Agosto 2007". Supersalud, p. 4. En consecuencia, y a partir de lo estipulado en la Ley 1122 de 2007 y de los resultados del diagnóstico realizado al interior de la SNS, se expidió el Decreto 1018 de 2007, que reestructuró la organización de la Superintendencia, con miras al cumplimiento de las funciones de coordinación del subsistema de IVC del SGSSS.

14. Artículo 3 de la Ley 1122 de 2007.

De esta forma, el subsistema IVC, dirigido por la Superintendencia Nacional de Salud, buscará supervisar, corregir o sancionar comportamientos que se distancien del marco regulatorio que rige el SGSSS. La reorganización de la estructura de la Superintendencia Nacional de Salud (Decreto 1018 de 2007) se inscribe en consecuencia también en el esfuerzo por consolidar las funciones de inspección, vigilancia y control, dentro de los alcances que la misma ley le otorga. Para ello

*... el desarrollo de las funciones, facultades y competencias asignadas de la Superintendencia podrá ser visto desde dos dimensiones. Por un lado, en la realización directa de algunas tareas de inspección, vigilancia y control y, de otro, las labores que orientan a coordinar las acciones de los diferentes agentes de control establecidos para cada uno de los ejes del sistema<sup>155</sup>, y de los distintos procesos que se desarrollan al interior de los mismos <sup>156</sup>.*

En concordancia con lo anteriormente expuesto, el nuevo marco regulatorio concibe el subsistema IVC de manera transversal a los tres ejes operativos del sistema de la siguiente manera:

Gráfico . Función especializada de Inspección, Vigilancia y Control

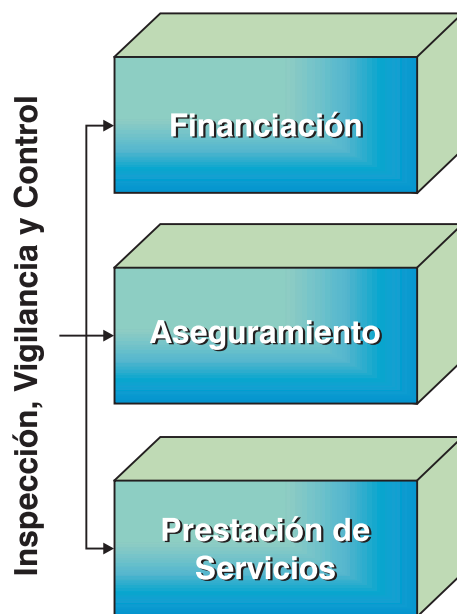

Las funciones especializadas de inspección, vigilancia y control están delegadas en los diferentes agentes del sistema, de acuerdo con lo dispuesto en distintos textos regulatorios (Ley 100 de 1993, Ley 1122 de 2007, Decreto 1018 de 2007, Ley 10 de 1990, Ley 60 de 1993, Ley 71 de 2001, y las demás normas reglamentarias).

1. Financiamiento, aseguramiento y prestación de servicios.

16. Informe Primer Año de Gestión. Septiembre 2006-Agosto 2007. José Renán Trujillo García, Supersalud, p. 8.

Gráfico 6. Función especializada de IVC

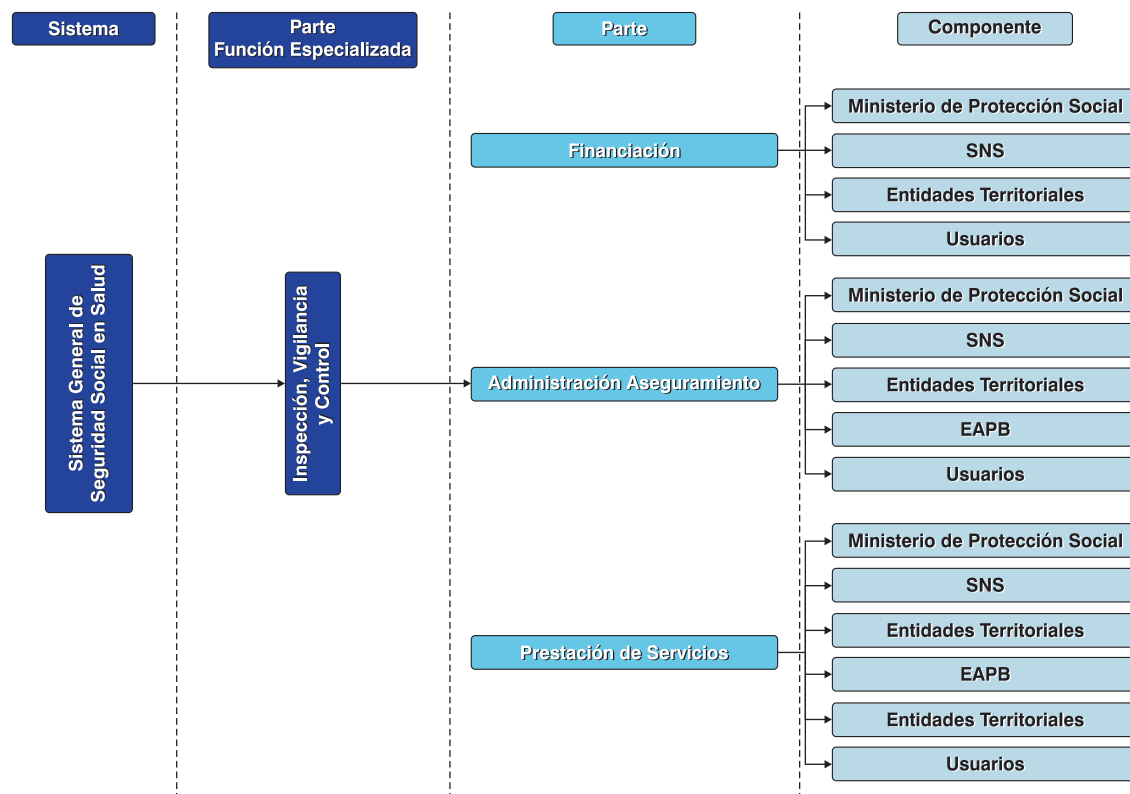

En las partes de aseguramiento y prestación de servicios del SGSSS cuyos componentes reciben un importante número de quejas, se crea el Sistema Obligatorio de Garantía de Calidad de Atención en Salud del Sistema General de Seguridad Social en Salud (SO-GCS) (Ver Gráfico 7). El Decreto 1011 de 2006 define este subsistema como el conjunto de instituciones, normas, requisitos, mecanismos y procesos deliberados y sistemáticos que desarrolla el sector salud para generar, mantener y mejorar la calidad de los servicios de salud en el país.

Las responsabilidades de seguimiento y control que tienen las instituciones que hacen parte del subsistema de IVC de salud, de acuerdo con la reforma, estarían dirigidas a los ámbitos de: habilitación, auditoria de mejoramiento de calidad de la atención en salud, el sistema único de acreditación y el sistema de información para la calidad. Estas modificaciones buscan corregir las disfunciones históricas que ha tenido el subsistema de inspección, vigilancia y control del SGSSS: ausencia de los usuarios como parte integral del sistema y la imposibilidad de generar redes de seguimiento y control para cumplir con los estándares y normas impuestas por el regulador del sistema.

Las últimas reformas al SGSSS buscan, en el mismo sentido, que la atención del usuario sea uno de los criterios de evaluación de calidad; que se establezcan redes de control en varios niveles de operación (descentralizando la función en agentes distintos a la Superintendencia Nacional de Salud) y el diseño de un Sistema Único de Información (Ver Gráfico 8).

Gráfico 7. Sistema Obligatorio de Garantía de Calidad de Atención en Salud del Sistema General de Seguridad Social en Salud (SOGCS)

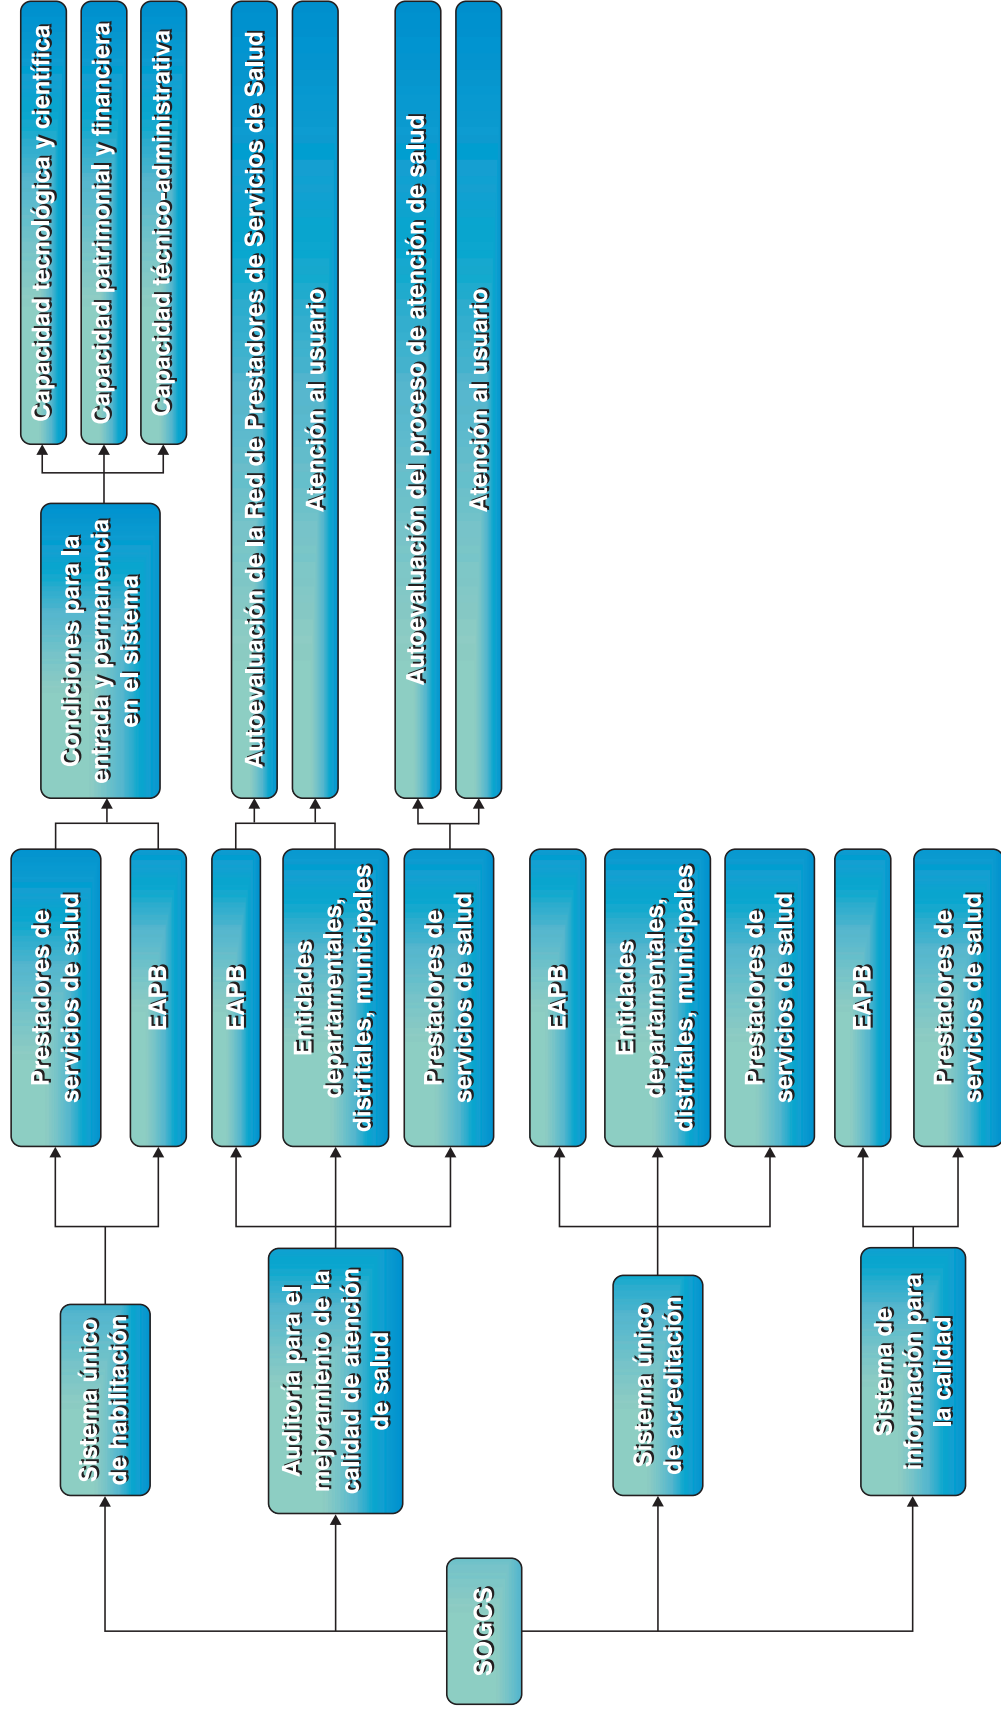

## Gráfico 8. Sistema Único de Información

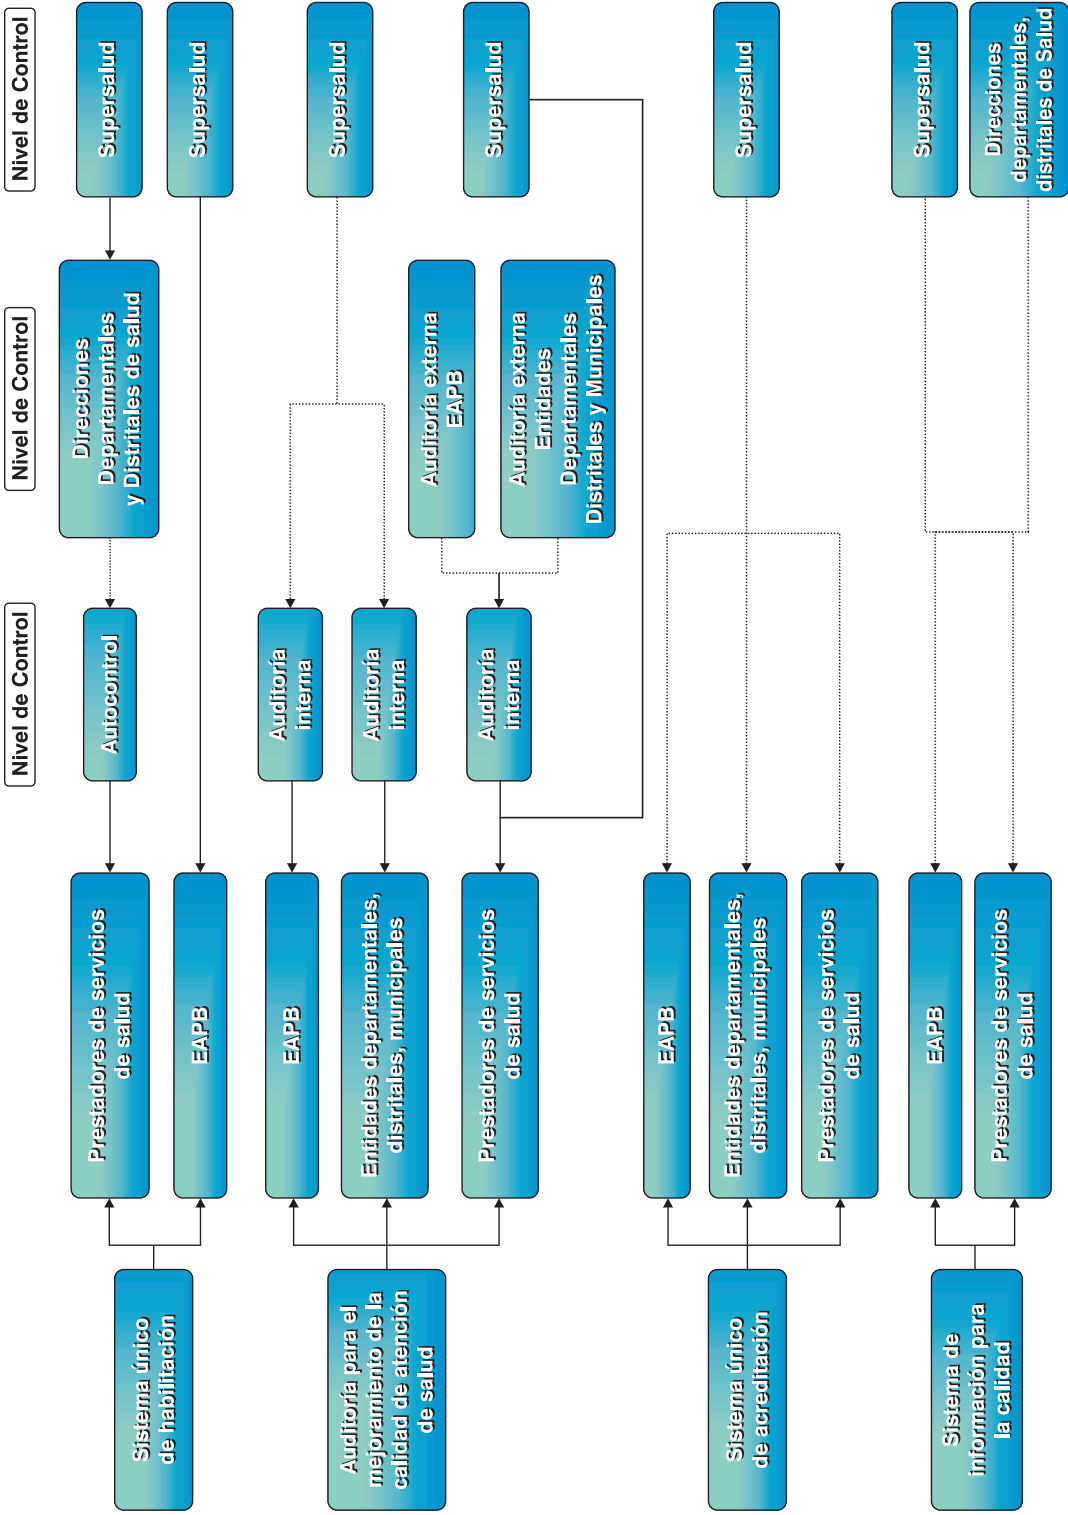

El modelo de red de IVC que introduce la última reforma al SGSSS busca solucionar los problemas de operatividad y funcionamiento del sistema. Permite la concurrencia de instituciones externas al sistema que, en virtud de sus atribuciones legales, ejercen funciones de inspección, vigilancia y control del sector de la salud. La ley menciona explícitamente la articulación de la Superintendencia Nacional de Salud con la Defensoría del Pueblo, para la instauración de la figura del Defensor del Usuario<sup>17</sup>. Sin embargo, la naturaleza y sentido de instituciones como la Procuraduría General de la Nación, las Personerías Municipales y la Contraloría General de la República, entre otras<sup>18</sup>, concurren también en el ejercicio de labores de vigilancia y control desde los ámbitos legales que les son propias<sup>19</sup>. Además, en la red de IVC podrán participar diferentes instituciones de la rama judicial como la Corte Constitucional, los Tribunales y los jueces que resuelven las acciones de tutela instauradas por los usuarios.

La Procuraduría General de la Nación (PGN), como entidad rectora del Ministerio Público, es el órgano autónomo de control encargado de vigilar el cumplimiento de la Constitución, proteger los derechos humanos, defender los intereses de la sociedad y ejercer vigilancia superior sobre la conducta oficial de las funciones administrativas<sup>160</sup>. En virtud de estas atribuciones constitucionales y en ejercicio de las funciones definidas en el Decreto 262 de 2000, la PGN recibe y da trámite a las quejas relacionadas con temas de prestación de salud y realiza las investigaciones disciplinarias relacionadas con el manejo de los recursos destinados para el sector de la salud y la actuación de funcionarios públicos y particulares que cumplen función pública. Al respecto es pertinente señalar que el Código Único Disciplinario define expresamente el alcance de la función disciplinaria de la Procuraduría General de la Nación, tema que también ha sido aclarado por la Corte Constitucional:

*El artículo 25 de la Ley 734 de 2002, consagra como destinatarios de la ley disciplinaria, además de los servidores públicos, a los particulares señalados en el artículo 53 de ese estatuto; esta última disposición establece como tales a los siguientes sujetos:*

- a- Los particulares que cumplen labores de interventoría en contratos estatales*
- b- Los que ejerzan funciones públicas en lo que tenga que ver con éstas.*
- c- Los que presten servicios públicos a cargo del Estado de los contemplados en el artículo 366 de la Constitución Política, es decir los relativos a las necesidades insatisfechas en salud, educación, saneamiento ambiental y agua potable*
- d- Los que administren recursos estatales, salvo las empresas de economía mixta que se rijan por el derecho privado*

17. El artículo 42 de la Ley 1122 de 2007 dispone la creación del Defensor del Usuario en Salud, cuya función “será la de ser vocero de los afiliados ante las respectivas EPS en cada departamento o en el Distrito Capital, con el fin de conocer, gestionar y dar traslado a las instancias competentes, de las quejas relativas a la prestación de servicios de salud”.

18. La enumeración presentada no es exhaustiva ni excluyente, dado que también desempeñan funciones de IVC las auditorías externas, los tribunales de ética médica, los comités técnico-científicos, Invima, el Instituto Nacional de Salud, interventorías, entre otros.

19. En el mismo sentido, otros actores no institucionales, como las asociaciones de usuarios o las veedurías ciudadanas, desempeñan labores de vigilancia y control sobre el funcionamiento del sistema. Aunque es posible afirmar que el tipo de labor desempeñada en este sentido, como se expondrá más adelante, en el caso de las organizaciones no institucionales, en muchos casos sobrepasa la gestión de quejas para pasar a cuestionar el alcance mismo de los derechos que el sistema les ofrece a los usuarios del SGSSS.

160. Artículo 277 de la Constitución Política de Colombia.

*La Corte Constitucional, frente a las normas del nuevo estatuto, declaró exequibles los apartes demandados del artículo 53 de la Ley 734 de 2002, que tienen que ver con la posibilidad de disciplinar a los particulares que ejercen funciones de interventoría y que presten servicios públicos a cargo del Estado, en el entendido igualmente de que la función pública puede ser cumplida por particulares, mientras ella implique la exteriorización de las potestades inherentes al Estado “que se traducen generalmente en señalamiento de conductas, expedición de actos unilaterales y ejercicio de coerción”; supuesto en el que necesariamente “la posibilidad de que el particular pueda hacer uso de dichas potestades inherentes al Estado debe estar respaldada por una habilitación expresa de la ley” (C-037/2003) <sup>161</sup>.*

La Defensoría del Pueblo también forma parte del Ministerio Público y está encargada de la “promoción, ejercicio y divulgación de los derechos humanos”<sup>162</sup> para lo cual orienta a los habitantes del territorio nacional en el ejercicio y defensa de sus derechos ante las autoridades, desarrolla actividades de promoción y divulgación de los derechos humanos y el derecho internacional humanitario, y lleva a cabo acciones de defensa y protección de los derechos humanos, entre ellas la interposición de acciones judiciales (habeas corpus, acción de tutela, acciones populares) en caso de ser éstas procedentes para defender los derechos de los habitantes del territorio nacional<sup>163</sup>.

Las personerías municipales, de acuerdo con la Ley 136 de 1994, ejercen en el municipio las funciones de Ministerio Público. Por lo tanto vigilan el cumplimiento de la Constitución, defienden los intereses de la sociedad, vigilan el ejercicio eficiente y diligente de las funciones administrativas municipales y ejercen la vigilancia de la conducta oficial de quienes desempeñan funciones públicas municipales. Además, las personerías cooperan con el desarrollo de las políticas y propuestas del Defensor del Pueblo; interponen, por delegación del Defensor del Pueblo, las acciones de tutela en nombre de cualquier persona que lo solicite o se encuentre en situación de indefensión; y promueven la creación y funcionamiento de las veedurías ciudadanas y comunitarias, entre otras funciones estipuladas en el artículo 178 de la norma en mención.

De esa manera, la red de IVC queda integrada tanto por entidades que al interior del SGSSS ejercen estas funciones, como por la labor complementaria que están llamadas a cumplir otras instituciones, que si bien no forman parte del SGSSS sí cumplen funciones de IVC en un sentido más amplio y también tienen que ver con el funcionamiento del sistema de salud en diversos aspectos. El esquema se completa al incluir también el componente de control social que es ejercido directamente por la ciudadanía a través de los espacios de participación.

---

161. Procuraduría General de la Nación. Procuraduría Auxiliar para Asuntos Disciplinarios. Concepto C-23-06, Agosto 10 de 2006.

162. Artículo 282 de la Constitución Política de Colombia.

163. La Ley 24 de 1992 establece la estructura y organización de la Defensoría del Pueblo.

Gráfico 9. Instancias de control internas y externas al SGSSS

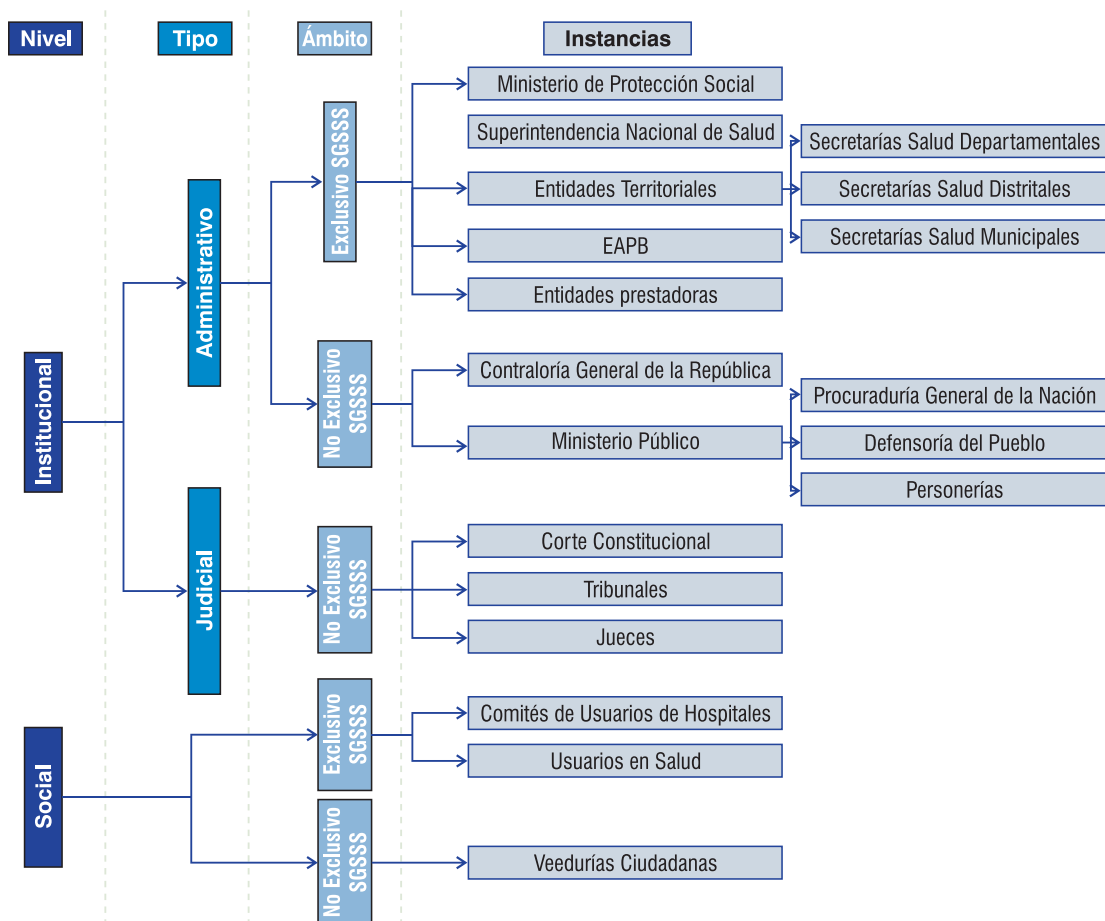

### 3.4.3. Financiación y administración

Tres son los componentes (entidades o instituciones) que constituyen la parte “Financiación y administración” del SGSSS. Estas instituciones son: el Fondo de Seguridad y Garantía (FOSYGA); las Empresas Promotoras de Salud (EPS) del régimen contributivo y las Administradoras del Régimen Subsidiado (ARS) –hoy EPS del régimen subsidiado– y las Direcciones Departamentales, Distritales y Locales de salud. Cada institución debe tener un subsistema de IVC que le permita obtener la información necesaria para cumplir adecuadamente con las funciones especializadas asignadas durante el diseño del SGSSS.

El FOSYGA se creó como una cuenta adscrita al Ministerio de la Protección Social. El subsistema de IVC que tiene esta institución está dirigido a seleccionar y procesar la información que le permita garantizar: el financiamiento del SGSSS; reunir cotizaciones y recursos fiscales destinados al régimen subsidiado; cubrir los riesgos catastróficos; recaudar las cotizaciones y delegar lo pertinente a las Entidades Promotoras de Salud (EPS). En la estructura piramidal global que tiene el SGSSS, el FOSYGA estaría ubicado en la parte intermedia. Pero el patrón de organización económico del SGSSS lo sitúa en

la cima de la pirámide organizacional, sobre todo si se tiene en cuenta que las decisiones del FOSYGA afectan notoriamente el funcionamiento adecuado de las otras partes y componentes del sistema.

Las Empresas Promotoras de Salud (EPS) son el segundo componente de la parte de administración y financiación del SGSSS. El subsistema de IVC de las EPS debe garantizar que la institución reciba por cada persona afiliada una Unidad de Pago por Capitación (UPC); recaude las cotizaciones; afilie usuarios; administre la prestación del servicio de salud que realizan las Instituciones Prestadoras de Salud (I.P.S.); reasegure los riesgos de la atención de enfermedades de alto costo; establezca un sistema de referencia y contra-referencia para el acceso a servicios de alta complejidad; ofrezca planes complementarios que son financiados por el afiliado con recursos distintos a las cotizaciones obligatorias.

Para mantener constante el equilibrio económico, financiero y administrativo del SGSSS se incorporan mecanismos para restringir la demanda de los servicios de salud. El diseño del SGSSS permite que las EPS utilicen modalidades de pago diferentes como capitación, protocolos y presupuestos globales fijos. Además, el diseño del SGSSS incentiva el control de costos como una estrategia necesaria para competir exitosamente en el mercado de la salud. Por lo tanto, las EPS deberán establecer sistemas de costos, facturación y publicidad.

La búsqueda de la eficiencia económica, que orienta el diseño de la parte administrativa y financiera del SGSSS, estimula a las instituciones que la componen para que elaboren estrategias competitivas que maximicen los recursos que reciben. Lo mismo sucede con las relaciones de contratación que acuerdan las EPS con las IPS. Este alto grado de eficiencia de las EPS es posible si existe internamente: una especialización del trabajo (Taylor), unas reglas y procedimientos específicos (Weber) y una racionalización de las actividades administrativas (Fayol). Estos principios de la teoría de organizaciones mecánicas son consistentes con los lineamientos reduccionistas de la filosofía estructuralista y los de la racionalidad económica que orientó el diseño del sistema.

Las direcciones departamentales, municipales y distritales de salud son el tercer componente de la parte responsable de la financiación y administración del SGSSS. El subsistema de inspección, vigilancia y control que tienen las direcciones de salud está orientado a lograr recaudar los recursos económicos necesarios que permitan financiar y administrar eficientemente la prestación de los servicios de salud en sus respectivas localidades. Las direcciones de salud son responsables de contratar los servicios de salud para los sectores más pobres de la población.

#### ***3.4.4. La prestación de los servicios y los usuarios del sistema***

Dos componentes constituyen la parte de prestación de servicios de salud del SGSSS: las Instituciones Prestadoras de Salud (IPS) y las Empresas Sociales del Estado (ESE). Su función especializada es prestar los servicios de salud a los afiliados, beneficiarios y vinculados al SGSSS. Estas funciones deben regirse por los principios de calidad, eficiencia, y autonomía técnica y administrativa. Con la delimitación de las instituciones responsables de la prestación de los servicios de salud se cierra la estructura global del SGSSS.

En la base de la pirámide están los usuarios del sistema (contributivos, subsidiados y vinculados). El subsistema de IVC del SGSSS relacionado con los afiliados (contributivos o subsidiados) debe garantizar que éstos puedan: elegir libremente la EPS, IPS y los profesionales adscritos; y conformar alianzas y asociaciones de usuarios que los representen ante las EPS y las IPS.

Cuando el afiliado al SGSSS no esté conforme con la atención recibida, el subsistema de IVC debe garantizar que él pueda reclamar ante: el Comité Técnico Científico de la EPS, las oficinas de atención al usuario de las EPS y otras instancias establecidas para ello<sup>164</sup>. En caso de no encontrar soluciones ante las instancias propias que tiene el SGSSS, los usuarios pueden acudir a órganos de control externos al SGSSS en procura de la defensa de sus derechos por otras vías administrativas e incluso acudiendo a las instancias judiciales. Como observaremos en el próximo capítulo, la mayoría de conflictos que ha tenido el SGSSS se provocan por la fragmentación, discriminación y exclusión de la población que genera el SGSSS.

El funcionamiento adecuado del SGSSS ha sido la principal preocupación de los responsables de su puesta en marcha. El SGSSS ha presentado múltiples disfunciones estratégicas (finalidades, patrón de organización, objetivos, destinos y tareas) y estructurales (organigramas, organización, trabajo, procesos y procedimientos, mecanismos de coordinación, flujos de información y comunicación, estructuras físicas y técnicas, funciones) en su operatividad. Las numerosas reformas y reglamentaciones han estado dirigidas a corregir las disfunciones de las partes y relaciones que lo configuran.

La totalidad de las reformas que ha tenido el SGSSS son de una naturaleza correctiva, intervención que es típica en los sistemas mecánicos. La última, contenida en la Ley 1122 de 2007, es consistente con esta forma de proceder. En ella vale la pena resaltar la creación de la Comisión de Regulación en Salud (CRES); el subsistema de Inspección, Vigilancia y Control y el Defensor del Usuario. Las funciones especializadas de estos tres nuevos componentes del SGSSS están directamente relacionadas con la “dirección, regulación y control” del sistema. Con ellas se busca centralizar las funciones especializadas en el Gobierno Nacional y en la Superintendencia Nacional de Salud. En consecuencia, la Comisión de Regulación en Salud (CRES) ejercerá, a partir del momento, la mayoría de las funciones especializadas asignadas en el diseño inicial para el Consejo de Nacional de Seguridad Social en Salud. La coordinación del subsistema de Inspección, Vigilancia y Control del SGSSS se centraliza en la Superintendencia Nacional de Salud.

La naturaleza, la estructura, la función y el sentido que tiene el diseño del SGSSS nos comprueban que éste fue construido para funcionar como si fuera un mecanismo de relojería (una totalidad desarmable, compuesta de partes y relaciones intercambiables que tienen unas funciones especializadas que interactúan según reglas deterministas). Desde

---

164. A partir de 2007 una de ellas es el defensor del usuario en salud.

la concepción de modelos ideales que orientó el diseño del SGSSS, el sistema fue diseñado para funcionar desde un “deber ser” de funcionamiento mecánico que teóricamente puede garantizar su adecuado desempeño.

El SGSSS se configuró en torno al funcionamiento conveniente de cuatro partes especializadas, autónomas e independientes, que tienen unos componentes específicos (entidades e instituciones) y unos subsistemas de Inspección, Vigilancia y Control particulares que les permiten obtener la información que garantice el adecuado funcionamiento global del sistema. El diseño del SGSSS estableció una finalidad concreta para el sistema: conservar el equilibrio económico, financiero y administrativo del sistema. La estructura y los procesos también están organizados para contribuir a cumplir con la finalidad económica, financiera y administrativa del SGSSS.

Sin embargo, la concepción sistémica mecánica ideal que tiene el diseño original del SGSSS ha venido presentando una sucesión de problemáticas en el ámbito de la salud, que serán descritos en detalle en el siguiente capítulo.

## CAPÍTULO 4

### El SGSSS en la práctica: un análisis desde la teoría de sistemas

En este capítulo se presentan los resultados obtenidos al analizar, correlacionar y combinar cuatro aspectos básicos que otorgan sentido, configuran la estructura y delimitan los procesos del SGSSS colombiano. Estos cuatro aspectos básicos, en torno a los cuales se elaboró el estudio del funcionamiento real del sistema son: los efectos; la configuración y funcionamiento del subsistema de Inspección, Vigilancia y Control (IVC) interno y externo; el derecho a la salud definido por los estándares internacionales y la jurisprudencia nacional; y los aportes de la reflexión teórica sistémica expuesta en el primer aparte de este capítulo. El estudio empírico de las características específicas de estos cuatro componentes básicos y sus dependencias mutuas, está sustentado con información recopilada de múltiples fuentes primarias, secundarias y terciarias de información: investigaciones institucionales, muestras aleatorias de quejas de usuarios, y entrevistas a funcionarios directamente responsables del funcionamiento del SGSSS.

#### *4.1. El funcionamiento real de un sistema ideal de atención en salud*

La proliferación de tutelas y quejas, las constantes reformas y las investigaciones y estudios realizados por instituciones públicas y privadas del país comprueban que si bien ha habido importantes avances, el SGSSS no ha logrado solucionar definitivamente las problemáticas que propiciaron su diseño a través de la Ley 100 de 1993: de cobertura, ineficiencia en la asignación de recursos, deficiente calidad de los servicios, inadecuados procesos de referencia y contrarreferencia, baja capacidad resolutoria, deficiencia en la administración de las instituciones, mínimo control de enfermedades transmisibles, escalada de costos, incentivos inadecuados, inseguridad financiera e insatisfacción de los usuarios.

La poca efectividad del SGSSS ha sido reconocida en múltiples informes de diferentes entidades privadas y públicas del país. Un ejemplo de este reconocimiento está formalmente consignado en el siguiente testimonio:

*[Hay] dificultad de los gobiernos en alcanzar su ideal de equidad en la prestación de servicios médicos tanto en el sentido de buscar que la cobertura sea universal, como desde el punto de vista del mismo tipo de atención para la población. Indudablemente en este aspecto, en no pocos países, el problema central lo constituye el planteamiento de objetivos muy ambiciosos en relación con los recursos disponibles [...] Otro problema, al cual se ha hecho referencia de manera plural, es el relacionado con las presiones para que aumente el gasto en salud, cuando no el aumento real de dicho gasto [...] Un tercer problema frecuente tiene que ver con la calidad misma del servicio, en términos de la atención brindada a los usuarios, la respuesta dada a sus necesidades y la oportunidad de la misma. Dentro de esta misma categoría se ubica el tiempo de atención a los pacientes visto desde dos dimensiones: el que transcurre entre la solicitud de la atención y la realización de la misma, y el tiempo de espera durante el día de la atención médica* <sup>165</sup>.

La persistencia de los problemas en el ámbito de la atención de la salud y la limitada eficacia del SGSSS para solucionarlos contradicen, en la mayoría de los casos, los fundamentos de servicio público que orientaron el diseño del SGSSS, como equidad, obligatoriedad, protección integral, libre escogencia, autonomía de instituciones, descentralización administrativa, participación social, concertación y calidad, consignados en el artículo 13 de la Ley 100 de 1993 <sup>166</sup>. Olvidando las evidencias (tutelas, quejas, reclamos y el estado de salud de los colombianos) que cuestionan negativamente el sentido de organización del SGSSS, el cual reduce la operatividad del sistema a la búsqueda de eficiencia en los aspectos económicos, financieros y administrativos, las continuas reformas se han centrado en modificar los aspectos funcionales y estructurales <sup>167</sup> del modelo.

Paradójicamente, las situaciones conflictivas que se han venido presentando durante los quince años de funcionamiento del sistema, nos demuestran que los principios esenciales, el “deber ser” del SGSSS, no son del todo consistentes con los “ideales” que orientaron el diseño formal mecánico del sistema. La inconsistencia entre los principios globales –orientados hacia la búsqueda de la satisfacción del derecho a la salud– y los fundamentos económicos, financieros y administrativos “ideales” locales, que dan forma al SGSSS, no permite que el subsistema de regulación y control obtenga la información necesaria para lograr el adecuado funcionamiento en el ámbito de la salud de los colombianos.

*Las instituciones públicas y privadas de cualquier nivel territorial están más interesadas en problemas de competencia entre agencias, repartición de contratos y mercados, mientras los actores sociales y el personero se interesan más en las presiones indebidas que los beneficiarios reciben por parte de las ARS, y las direcciones locales en la afiliación y permanencia en el sistema [...] Se puede afirmar que no existe un sistema*

---

16. Ministerio de Protección Social - Programa de Apoyo a la Reforma, Ministerio de la Protección Social. *Proyecto Evaluación y Reestructuración de los Procesos, Estrategias y Organismos Públicos y Privados encargados de adelantar las Funciones de Vigilancia y Control del Sistema de Salud, Informe Final*.

166. Ver artículo 13 de la Ley 100 de 1993.

167. Entiéndase por cambio estructural las modificaciones de las formas, de las partes y componentes del sistema que no afectan al mismo tiempo la conformación del sentido y la lógica del modelo.

*integral de control desde el punto de vista funcional, ni inteligente desde el punto de vista estratégico, porque cada una de sus partes no puede aprender de la otra ni prever acciones o consecuencias sobre los actos anteriores o futuros* <sup>168</sup>.

El diseño ideal, lineal, fragmentario, aislado, estático, asincrónico, y centralizado que tienen las partes, los componentes y el subsistema de regulación y control del SGSSS limita su adaptación a los cambios, internos y externos, que se han venido presentando en su funcionamiento. Este tipo de construcción del sistema se comprueba con las atribuciones que la Ley 100 define para el Estado en materia de la salud:

ARTICULO 154. *Intervención del Estado. El Estado intervendrá en el servicio público de Seguridad Social en Salud, conforme a las reglas de competencia de que trata esta Ley, en el marco de lo dispuesto en los artículos 48, 49, 334 y 365 a 370 de la Constitución Política. Dicha intervención buscará principalmente el logro de los siguientes fines: a) Garantizar la observancia de los principios consagrados en la Constitución y en los artículos 2 y 153 de esta Ley; b) Asegurar el carácter obligatorio de la Seguridad Social en Salud y su naturaleza de derecho social para todos los habitantes de Colombia; c) Desarrollar las responsabilidades de dirección, coordinación, vigilancia y control de la Seguridad Social en Salud y de la reglamentación de la prestación de los servicios de salud; d) Lograr la ampliación progresiva de la cobertura de la Seguridad Social en Salud permitiendo progresivamente el acceso a los servicios de educación, información y fomento de la salud y a los de protección y recuperación de la salud a los habitantes del país; e) Establecer la atención básica en salud que se ofrecerá en forma gratuita y obligatoria, en los términos que señale la Ley; f) Organizar los servicios de salud en forma descentralizada, por niveles de atención y con participación de la comunidad; g) Evitar que los recursos destinados a la Seguridad Social en Salud se destinen a fines diferentes; h) Garantizar la asignación prioritaria del gasto público para el servicio público de Seguridad Social en Salud, como parte fundamental del gasto público social* <sup>169</sup>.

Los resultados obtenidos por el SGSSS, que serán sustentados con la investigación empírica en todo el numeral 4.2 del presente capítulo, nos demuestran que el diseño mecánico del sistema y la naturaleza progresiva de la cobertura, hoy incierta, no han logrado cumplir con lo “idealmente” esperado.

El patrón de organización (sentido económico ideal), la estructura (centralizada y jerárquica) y los procesos de aprendizaje (dispositivos de regulación y control fragmentarios) que tiene el modelo mecánico trivial (entrada, función y salida)<sup>170</sup> que orientaron el diseño del SGSSS, han imposibilitado la construcción de un sistema de atención en salud que se corresponda con el derecho constitucional a la salud que debería tener la población. El análisis y la interpretación de la información (primaria, secundaria y terciaria) obtenida durante el proceso investigativo, que será presentada en los apartes sucesivos, comprue-

168. Ver: PARS y Universidad Nacional de Colombia, Facultad de Ciencias Económicas (2002) *¿Ha mejorado el acceso en salud? Evaluación de los procesos del régimen subsidiado*, Bogotá, UNIBIBLOS.

169. Ley 100 de 1993.

170. Los sistemas triviales son predecibles e independientes de la historia. Sus procesos deben ser estáticos y no se relacionan con los cambios del entorno. Sus partes y componentes están sistemáticamente determinadas y son analíticamente determinables. La obediencia es su característica esencial. Ver: Heinz von Foerster (1996). *Las semillas de la cibernética*, Gedisa, Barcelona.

ban que el modelo de sistema de salud no ha podido garantizar el derecho a la salud porque reduce la complejidad de las problemáticas de salud, individual y colectiva, a la atención de enfermedades. Además, la búsqueda de acciones que permitan lograr la eficiencia económica, financiera y administrativa del sistema contribuye a dificultar la obtención de los objetivos inicialmente planeados. Desde la visión científica de las teorías contemporáneas en los campos biológicos<sup>171</sup>, económicos<sup>172</sup>, financieros<sup>173</sup>, culturales<sup>174</sup>, sociales<sup>17</sup> y políticos<sup>176</sup>, la perspectiva clásica de eficiencia económica, financiera y administrativa que orientó el diseño del SGSSS no es una solución conveniente, y, por el contrario, contribuye a generar otras problemáticas.

Ante la situación conflictiva que se ha mostrado en la operatividad del SGSSS, los defensores<sup>177</sup> del modelo tradicional argumentan que se ha presentado una serie de contingencias biológicas, económicas, políticas y culturales que han impedido el cumplimiento de la finalidad del sistema. Pero estas contingencias y externalidades pudieron haber sido previstas durante la selección del modelo de atención en salud, en anticipación de posibles dificultades, lo cual habría implicado la construcción de un modelo de sistema de atención en salud y un subsistema de regulación y control radicalmente diferentes, que tuvieran una naturaleza no trivial, compleja y adaptativa<sup>178</sup>. Como se observará más adelante, la insistencia en las reformas correctivas de los elementos funcionales y estructurales del SGSSS, expresa una actitud que está en contravía de los hechos que demuestran la poca eficacia de este tipo de intervenciones. La insistencia hace que la mayoría de las acciones sean irracionales<sup>179</sup> y que afecten, directa e indirectamente, la posibilidad de garantizar el derecho de la salud que, de acuerdo con la Constitución y las obligaciones internacionales, ha adquirido el Estado y del cual deberían disfrutar todos los habitantes del territorio nacional.

#### 4.1.1. Problemática y contexto

##### 4.1.1.1. Los problemas persisten

No obstante los avances que ha tenido el sector de la salud, la persistencia de antiguas problemáticas y la generación de nuevas en el campo de la atención en salud, individual y colectiva, cuestiona la verdad de las creencias fundamentales que orientaron el diseño, teórico y práctico, del SGSSS. La permanencia de estas situaciones conflictivas, pese a las

---

171. Ver John H. Holland (2004). *El orden oculto*, Fondo de Cultura Económica, México.

172. Ver Paul R. Krugman (1996). *La organización espontánea de la economía*, Antoni Bosh, Barcelona.

173. Ver Benoit Mandelbrot y Richard L. Hudson (2006). *Fractales y finanzas*, Tusquets, Barcelona.

174. Ver Robert Aunger (2002). *El meme eléctrico*, Paidós, Barcelona.

17. Ver Duncan J. Watts (2003). *Seis grados de separación*, Paidós, Barcelona.

176. Ver Elinor Ostrom (2000). *El gobierno de los bienes comunes*, Fondo de Cultura Económica, México.

177. Las ciencias cognitivas contemporáneas nos demuestran que las personas, grupos o instituciones que no pueden explicar los problemas generados durante sus acciones se pueden catalogar como “verdaderos creyentes”, los cuales tienden a buscar “culpables” para los conflictos que ellos mismos generan. Para una mayor profundización de este aspecto véase: Daniel C. Dennett (1992). *La libertad de acción*, Gedisa, Barcelona.

178. Véase Stuart Kauffman (2003). *Investigaciones*, Tusquets, Barcelona.

179. La defensa de creencias que la ciencia contemporánea y la realidad han demostrado que son falsas conduce a la generación de actos que pueden ser clasificados como irracionales. Para profundizar estos conceptos véase: Laszlo Mero (2001). *Los azares de la razón*, Paidós, Barcelona.

innovaciones que aportó la Ley 100 de 1993, y sus posteriores reformas, a las problemáticas identificadas para justificar su diseño, nos demuestran que:

- El éxito o el fracaso de las acciones en el sector salud no necesariamente depende de la naturaleza privada o pública de las entidades. Éste fue y, aún hoy continúa siendo, un presupuesto teórico y práctico básico de la organización del SGSSS. Erradamente se consideró que las problemáticas de salud estaban “causalmente” originadas en la naturaleza pública monopólica del servicio de salud. Con el tiempo, la solución planteada –participación de los particulares bajo “competencia regulada”–, ha producido efectos perversos (barreras de acceso, discriminación por ingresos, contención de costos, baja calidad y maximización de las utilidades) que, agregados a la continuidad de las antiguas problemáticas, nos comprueban la equivocación de la concepción económica mecánica. El interés de la racionalidad económica competitiva privada ha generado efectos irracionales en los servicios de salud, que pueden ser identificados en las razones que motivan las múltiples quejas y tutelas de los usuarios del SGSSS.
- La concepción sistémica mecánica (imposición de un camino programado y predecible) que tiene el SGSSS no ha logrado corregir las discrepancias entre el estado real de salud y la situación idealmente esperada en el modelo.
- La competencia regulada sustentada en el control de los servicios (POS contributivo y subsidiado) y los precios (UPC contributiva y subsidiada) no ha logrado limitar las asimetrías del mercado de la salud.
- El control de costos y la búsqueda de la eficiencia económica, financiera y administrativa no han generado las mejorías en la cobertura y la calidad de los servicios de salud que se ofrecen a los afiliados y beneficiarios del sistema.
- Las condiciones biológicas, económicas, culturales y políticas que enmarcan el sistema no han permanecido constantes. Estas modificaciones permanentes hacen que la sostenibilidad económica del sistema no se pueda lograr solamente con los recursos provenientes de los regímenes contributivo (incremento progresivo de los ingresos individuales y empresariales) y subsidiado (incremento progresivo de los ingresos públicos) de los afiliados y beneficiarios del sistema. El estudio de las razones que sustentan la presentación de quejas, tutelas y los comentarios de los agentes responsables del funcionamiento del SGSSS nos demuestran que el subsistema de inspección, vigilancia y control no ha generado la información completa necesaria para predecir con “certeza” los cambios en las condiciones económicas, locales y globales. Este hecho obligaría a diseñar estrategias de sostenibilidad del sistema que estén basadas en información que permita elegir, decidir y actuar en situaciones de riesgo (probabilidades) e incertidumbre (azar). Pero el presupuesto económico mecánico “ideal” que orientó el diseño del SGSSS considera que es posible mantener un crecimiento progresivo de los recursos económicos, individuales e institucionales del sistema. Sin embargo, las circunstancias económicas reales han ido desvirtuando esta posibilidad. Pequeños cambios en las circunstancias económicas individuales o

institucionales (desempleo, intransitividad de las preferencias, reducción de las inversiones públicas, contingencias y volatilidad de los mercados de capitales, inflación, devaluación, etc.) pueden tener efectos considerablemente grandes en la sostenibilidad económica del SGSSS (situación que es conocida como “efecto mariposa” en lógica de las catástrofes) y para la futura atención de salud de los colombianos. Los límites naturales y artificiales de los recursos no han permitido lograr la anhelada sostenibilidad económica del sistema.

- Los dispositivos de regulación de las partes y componentes del sistema no corrigen oportunamente las disfunciones que se presentan en el sistema.
- El subsistema de inspección, vigilancia y control no permite adaptar el sistema a los cambios internos y externos que inciden en su funcionamiento acentuando el crecimiento exponencial de quejas en el sector salud.

La proliferación de quejas y tutelas nos comprueba que la naturaleza mecánica (fuente-emisor-mensaje-canal-receptor) e inferencial (intereses comunes que permiten la negociación mutua de significados) de los dispositivos de coordinación (comunicación) del subsistema de regulación y control no han podido explicar los problemas de interacción que se generan entre las diferentes partes y componentes del SGSSS. Esta ausencia de explicación de los problemas impide la resolución oportuna de los conflictos operativos y limita las posibilidades de evolución que garanticen su adecuado funcionamiento. Lo mismo sucede con los dispositivos de recopilación y procesamiento de información, los cuales no han podido disminuir la incertidumbre que se presenta cuando interactúan agentes con intereses diferentes en un esquema de competencia regulada, como el que incentiva el diseño del SGSSS. Este hecho es confirmado con el estudio que realizó el equipo de la Universidad Nacional y el PARS:

*La obtención de los objetivos propuestos en el proyecto no fue fácil. Se presentaron dificultades por la falta de compromiso de las instituciones, más que de los funcionarios asignados al proyecto. A pesar de las buenas intenciones de unos pocos, no existe convicción en las Direcciones de las Empresas Promotoras y Prestadoras acerca de la importancia de escuchar la Voz del Cliente, ni de la utilidad de la misma para detectar los puntos críticos de una organización (que en muchos de los casos tiene las soluciones a la mano para las situaciones que causan inconformidad al cliente)* <sup>180</sup>.

El algoritmo economicista funcional ideal que sustenta las reglas de elección, decisión y acción de las partes y componentes del SGSSS ha imposibilitado la generación de un cambio profundo en el estado de salud de los individuos y poblaciones. Esto tiene sus orígenes en la concepción de sistema ideal, con funcionamiento mecánico y fragmentario, que orientó el diseño inicial del SGSSS y de su subsistema de IVC. La reducción del SGSSS a una colección simple de partes y relaciones organizadas en torno a la satisfacción del interés económico, financiero y administrativo, máximo resultado de la compe-

---

180. Ministerio de la Protección Social - Programa de Apoyo a la Reforma de Salud, Universidad Nacional. *Régimen Subsidiado*. Volumen V. Vigilancia y Control. Documento consultado en la página electrónica: [http://www.minproteccionsocial.gov.co/pars/library/documents/DocNewsNo16197DocumentNo4277.PDF].

tencia regulada, condiciona, entre otras, la posibilidad de obtener una atención en salud que sea oportuna, adecuada, universal y de calidad, como lo comprueba empíricamente la multiplicidad de reformas, y las quejas y tutelas que se han venido presentando durante los quince años de su funcionamiento.

Los dispositivos y mecanismos de inspección, vigilancia y control del SGSSS están dirigidos a recopilar y procesar la información necesaria para conservar el equilibrio financiero del sistema. Esta delimitación económica, financiera y administrativa del subsistema de IVC impide que se hagan los correctivos necesarios y oportunos frente a las problemáticas relacionadas con la atención en salud. Por ello los conflictos han tenido que resolverse en instancias externas al SGSSS, ya sea a través de la vía administrativa ante las entidades del Ministerio Público, o con el uso de los mecanismos jurisdiccionales a los que acuden los usuarios insatisfechos.

Las reglas que gobiernan las conductas entre las partes del SGSSS fueron establecidas como *constitutivas*<sup>181</sup> en el campo económico, financiero y administrativo del sistema, y *regulativas* en la atención de la salud. Esta delimitación de las reglas de interacción entre las partes y componentes del sistema hace que la mayoría de los actos en el campo de la salud prioricen los aspectos económicos, financieros y administrativos del proceso de la atención de la enfermedad, en detrimento de otras variables, biológicas, políticas o culturales, que inciden significativamente en la adecuada prestación del servicio. En consecuencia, las acciones en estos aspectos no resultan tan exitosas como el modelo ideal esperaba. Este conflicto se representa adecuadamente en los testimonios recopilados.

Los parámetros fijos de elección y decisión establecidos por la regulación del sistema, limitan la actuación de los agentes, en el micronivel, a la utilización de racionalidades de naturaleza económica competitiva que, en la mayoría de los casos, no se corresponden con los principios del derecho a la salud de la población. Como consecuencia, el incremento del orden en los aspectos económicos, financieros y administrativos del SGSSS ha generado desorden en el ámbito de la atención en salud.

La fragmentación y reducción de la población –de acuerdo con la cantidad de sus ingresos económicos– que el SGSSS contiene no han producido los eventos necesarios para transformar el estado de salud de individuos y colectivos. Los límites económicos, financieros y administrativos que el sistema impone a las acciones de los agentes hacen que éstas, en la mayoría de los casos, sean desafortunadas<sup>182</sup> en el campo de la atención en salud. La mayoría de los objetivos (expresiones lingüísticas realizativas) que orientaron el diseño y determinan hoy la finalidad del SGSSS y los que contiene la Ley 100 de 1993 han tenido dificultades en ser cumplidos a cabalidad, especialmente en el campo de la atención en salud de todos los colombianos.

---

181. Hablar un lenguaje es participar en una forma de conducta gobernada por reglas. Hablar consiste en realizar actos conforme a reglas. Para una mayor profundización ver: John Searle (1990). *Actos de habla*, Cátedra, Madrid.

182. John L. Austin (1990). *Cómo hacer cosas con palabras*, Paidós, Barcelona. Este autor nos señala que existen múltiples expresiones lingüísticas que tienen la propiedad de ser acciones al expresarlas. Estas expresiones se llaman realizativas y pueden sintetizarse en la fórmula “decir cosas implica hacer cosas”.

La concepción mecánica que guió el diseño del SGSSS considera que el entorno, la finalidad, el patrón de organización, la estructura y los procesos son invariables y tienen un ritmo de crecimiento constante. Esta rigidez impide la creación de alternativas que adapten el SGSSS a los cambios permanentes que por su propia naturaleza dinámica tiene el entorno. Un ejemplo destacado de esta anomalía se relaciona con el impacto que tiene el ritmo de crecimiento de la economía, considerada ésta como un factor clave para la financiación del sistema:

*El modelo de reforma suponía que la economía crecería por lo menos en un 4% anual, la tasa de desempleo no pasaría del 14%, el empleo asalariado crecería en un 3,5% anual y el independiente en un 2,1%, y los ingresos reales promedio de los asalariados e independientes crecerían en un 1,8% por año. Estos supuestos no se concretaron y, por el contrario, evolucionaron en forma desfavorable. Desde 1996, la variación del PIB estaba por debajo del supuesto, llegando a un crecimiento negativo en 1999. A partir de 1998, el desempleo sobrepasó el esperado y se mantiene en el orden del 18% <sup>183</sup>.*

En consecuencia, el sentido y la poca efectividad de las reformas del SGSSS comprueban que el sistema ha tenido dificultades para direccionarse y cumplir con la finalidad esperada: obtener, en el corto plazo, una solución a las problemáticas de salud que se presentaban en el momento de su creación.

#### **4.1.1.2. Unsistema de control de calidad deficiente**

El subsistema de inspección, vigilancia y control del SGSSS tiene incorporado un mecanismo formal de garantía de calidad. Sin embargo, las quejas relacionadas con la calidad de los servicios sugieren que este mecanismo presenta deficiencias en su funcionamiento. La persistencia de las quejas además manifiesta que la eficiencia del subsistema de regulación y control del SGSSS no ha podido crear las condiciones operativas necesarias para garantizar que el servicio público de salud se encuentre dentro de los estándares de calidad requeridos. Algunos entrevistados señalan:

*La mayoría de quejas tienen que ver con la calidad en la prestación del servicio de las EPS. Alrededor de 1.050 en el trimestre. Aunque depende de la época en que se interponga ... Las quejas más frecuentes son que las citas son demoradas y que les toca esperar mucho, que les toca hacer colas, que las citas las dan mucho tiempo después de que las piden .*

Según los datos registrados, en la muestra aleatoria de quejas tramitadas en el año 2006 por la Regional Bogotá de la Defensoría del Pueblo, los tres temas de mayor reclamo por parte de los usuarios, entre catorce categorías identificadas, son:

---

183. Luis J. Garay (2002). *Colombia, entre la exclusión y el desarrollo. Propuestas para la transición al Estado social de Derecho*. Contraloría General de la República en coedición con Alfaomega, Bogotá.

| Tema de la queja           | Porcentaje |
|----------------------------|------------|
| Calidad servicio IPS       | 27,5       |
| Contenido POS contributivo | 17,5       |
| Autorizaciones EPS         | 10,0       |

El mismo tipo de clasificación de reclamos se puede registrar en la muestra aleatoria de las quejas recibidas y tramitadas por la Superintendencia Nacional de Salud en el año 2006, en la cual, entre quince categorías de quejas, las tres más representativas son:

| Tema de la queja                                 | Porcentaje |
|--------------------------------------------------|------------|
| Desarrollo servicios - Subtema: Calidad servicio | 18,4       |
| Aseguramiento – Subtema: Información*            | 13,1       |
| Otras instituciones – Subtema: Otros**           | 10,5       |

La información obtenida con el análisis y la interpretación de las quejas y los testimonios confirma que el subsistema de control del SGSSS tiene limitaciones en la aplicación de estándares de calidad y en el control de los diferentes agentes del sistema.

La poca efectividad del subsistema de inspección, vigilancia y control afecta no sólo la calidad de la prestación del servicio público de la salud sino el derecho a la salud que tiene la población. En el mismo sentido, se hace notoria la ausencia de coordinaciones efectivas entre las partes y componentes del sistema, las cuales tienden a actuar sin convergencia. Los defectos de los mecanismos de regulación y control de la atención en salud, y no solamente en el aspecto de la calidad, confirman que el diseño mecánico del SGSSS no ha permitido el aprendizaje necesario para lograr un funcionamiento efectivo. Después de quince años de implementado, el subsistema de regulación y control no ha modificado sustancialmente el comportamiento del sistema y los errores continúan presentándose. Las diferentes partes y componentes que configuran el SGSSS no pueden, por su diseño (aislado, especializado y fragmentario), trabajar en armonía. La independencia funcional no permite que cada una conozca lo que hacen las otras, con lo cual las incapacita para recibir y transmitir mensajes de las demás y actuar según estas informaciones.

#### 4.1.1.3. ¿Un modelo con enfoque diferencial?

El modelo mecánico ideal que orientó el diseño del SGSSS está fundamentado en el aislamiento, funcional y especializado, de sus partes y componentes. Esta desvinculación

\* Aquí están casos de doble afiliación o desactualización de los datos pero también la solicitud de una persona de un medicamento No-Pos. y la solicitud de un examen que la EPS dice no cubre.

\*\* Se incluyen temas como la falta de idoneidad profesional de personal de centros odontológicos, falta de higiene en instrumental de centro odontológico, establecimientos de salud, funcionamiento inadecuado de centros de estética.

produce un desconocimiento generalizado entre los diferentes agentes que actúan dentro del sistema. El desconocimiento entre los agentes no permite la coordinación global, y, por lo tanto, el sistema requiere de una autoridad centralizada de regulación y control<sup>184</sup>.

No obstante, la centralidad de la regulación y control no permite la obtención de la información relevante que garantice una comprensión profunda de las razones que están dirigiendo las acciones de las partes y componentes del SGSSS, porque sus acciones particulares no inciden en el comportamiento global del sistema. La ausencia de correlaciones en el SGSSS hace que las perturbaciones (disfunciones, quejas, reclamos y tutelas) no afecten al sistema y limiten sus capacidades de funcionamiento, adaptación y evolución.

Consistente con el diseño fragmentario y aislado del SGSSS, el subsistema IVC carece de instrumentos elaborados de acuerdo con las diferencias, biológicas, económicas, sociales y culturales, que permitan comprometer la actuación del Estado respecto de las poblaciones vulnerables. Pese a que poblaciones como los indígenas y desplazados deben tener, por ley, tratamientos diferenciados, la actuación de los agentes del sistema no siempre refleja estas consideraciones particulares. Los resultados obtenidos, durante las visitas y entrevistas, permiten deducir que los procedimientos establecidos para la recopilación y procesamiento de la información se limitan a la asignación de reglas funcionales universales que orientan la acción de los agentes.

En las entrevistas y a partir de la revisión de los formatos de recepción y trámite de quejas en las entidades, se confirma que no se cuenta con los medios de información que se adapten a las diferencias de los usuarios, especialmente tratándose de poblaciones vulnerables. La homogeneización de los procesos de codificación y decodificación de los mensajes que tienen los medios de registro tradicionales no permiten generar una sistematización efectiva y con un enfoque diferencial de quejas provenientes de esta fracción de la población. Como lo señala uno de los entrevistados:

*Todas las quejas se registran en el sistema. Sin embargo no en todas las quejas es posible completar los datos de sexo, localidad, edad, etc., pues muchas de estas quejas llegan por correo urbano y la persona no llena este tipo de datos. Eso sólo es posible llenarlo cuando se trata de quejas telefónicas .*

En el caso particular de las poblaciones indígenas, que cuentan con un régimen especial en salud, las dificultades, según los entrevistados, parecen acentuarse por la ausencia de una perspectiva cultural dentro de la concepción misma del sistema de salud:

*El acceso se ve limitado por las barreras geográficas, largas distancias, que se interponen entre los indígenas y los centros de atención. Limitaciones culturales: se debe reconocer en el POS-S las prácticas formales de estas comunidades. Limitaciones de género: en el caso de las mujeres, la visita al médico representa una afectación de los conceptos de intimidad que manejan las comunidades . (Danilo Valbuena Ussa, Coordinador del Grupo de Asuntos Étnicos de la Delegada para la Prevención en Materia de Derechos Humanos y Asuntos Étnicos, PGN).*

---

184. Watts. Ob. cit., p. 4.

#### 4.1.1.4. Un modelo economicista ideal

El modelo mixto de atención en salud regido bajo un esquema de competencia regulada ha creado múltiples conflictos, básicamente originados por la privatización del servicio de salud. Es conveniente recordar que:

- Los bienes o servicios privados son excluyentes por naturaleza y no permiten el consumo simultáneo de ellos.
- Los bienes o servicios públicos tienen un consumo simultáneo y la exclusión es imposible.
- Los bienes o servicios mixtos son ambiguos y se caracterizan por producir problemas de rivalidad o colapso, que se presenta cuando el número de consumidores es tan alto que disminuye el beneficio individual que éstos deberían ofrecer<sup>18</sup>.

De acuerdo con las características típicas de los bienes o servicios (privados, públicos y mixtos) expuestas en el párrafo anterior se deduce que el SGSSS ofrece:

- Un servicio de atención en salud privado que tiende a excluir a la población según el criterio de la cantidad de ingresos.
- Un servicio público de atención en salud que puede excluir y permite un consumo simultáneo, lo cual incide en su equilibrio financiero y en la posibilidad de competir con los servicios privados.
- Una combinación de los servicios, que hace colapsar al sistema.

Las limitaciones del sistema para cumplir con los principios y objetivos generales nos demuestra que el modelo de atención en salud, pese a contar con medidas tendientes a compensar las inequidades, excluye fracciones de población y que el SGSSS tiende a colapsar cuando pretende satisfacer el derecho constitucional a la salud, que se supone deben tener los habitantes del territorio nacional:

*Las metas planteadas por la Ley 100 en términos de obtener en el 2001 una cobertura universal a la seguridad social en salud se encuentran a mitad de camino y alcanzarlas se ha aplazado para un futuro incierto. A través de la Ley 715 se sanciona esta perspectiva al establecer que a partir de 2004 “el Sistema de Seguridad Social en Salud deberá recuperar la meta de lograr aseguramiento universal de la población” (artículo 70). La aspiración de obtener una progresiva igualdad en los servicios de aseguramiento de los dos regímenes, el subsidiado y el contributivo, se percibe cada vez más lejana. Las circunstancias de crisis económica, incremento de pobreza y pérdida de cohesión social*

---

18. Ver: Fernando Aguilar (1991). *Interés individual y acción colectiva*, Pablo Iglesias, Madrid.

*hacen urgente la tarea de revisar las prioridades en la asignación de recursos y redefinir los mecanismos para reimpulsar el proceso tendiente al pleno ejercicio del derecho a la salud y el aseguramiento universal* <sup>186</sup>.

Las reglas que rigen el comportamiento de las partes y componentes del SGSSS provienen de la teoría de la racionalidad económica perfecta. Esta teoría presupone la existencia de capacidades cognitivas en los humanos que en la realidad han demostrado ser inverosímiles<sup>187</sup>. El pluralismo estructurado, sistema ideológico que orientó la reforma de la atención en salud colombiana, reconoce la existencia de posibles imperfecciones en el mercado de la salud y para corregirlas establece dos regulaciones básicas: la primera, dirigida al servicio, llamada Plan Obligatorio de Salud (POS) y la segunda, orientada hacia el control de los precios, denominada Unidad de Pago por Capitación (UPC), con las que se esperaba corregir las imperfecciones del mercado de la salud. Pero para que estas medidas sean realmente efectivas los agentes de las acciones deben estar orientados bajo los parámetros de una racionalidad perfecta. Las características de este tipo “ideal” de hombre económico son: poseer información completa; conocer todo el curso que puede seguir su actividad y las consecuencias que ésta trae consigo; estar capacitado para percibir todas las variaciones del entorno por insignificantes que sean; poner en orden y escoger siempre la opción que le permita obtener el máximo de utilidad. Estas condiciones le permiten al agente de la acción elegir y decidir sin riesgo.

Sin embargo, las elecciones, decisiones y acciones de los agentes (usuarios, prestadores, administradores y directores) del SGSSS no se corresponden y no están orientadas, en la mayoría de los casos, bajo los parámetros de racionalidad presupuestos por los diseñadores del sistema. Son frecuentes los problemas de información, predicción y control que tienen durante sus interacciones los diferentes agentes del SGSSS, y los problemas de cantidad y calidad en la atención de la salud de los colombianos se derivan directa o indirectamente de las erradas concepciones ideales del sistema. El fraccionamiento de los actos administrativos y los problemas operativos que produce son un reflejo de la división artificial que sustenta la teoría de la decisión racional clásica que dirigió el diseño del modelo de sistema de salud colombiano. El exceso de racionalidad en tiempos, métodos, ritmos y especialistas que ha generado durante su operatividad el SGSSS ha traído consigo comportamientos irracionales (barreras de acceso, discriminación, fragmentación, cobertura incierta, baja calidad, etc.) de los agentes que contribuyen a fomentar la crisis generalizada del sistema. Pero incluso las medidas correctivas adoptadas para tratar de resolver las posibles imperfecciones del mercado de la salud han sido limitadas y no han cumplido con los objetivos esperados.

Los conflictos que se presentan por la utilización de modelos ideales para orientar las acciones del SGSSS tienden a producir, en el campo de la salud, múltiples contradicciones entre el macronivel de la política –guiada por la intención de la universalidad del servicio– y la lógica económica que guía las acciones en el micronivel del SGSSS, fundamentalmente dirigida hacia la maximización de las utilidades de los agentes operadores:

---

186. PARS, CID (2001). *Identificación y afiliación de beneficiarios*, Bogotá.

187. Herbert A. Simon (1989). *Naturaleza y límites de la razón humana*, Fondo de Cultura Económica, México.

*Vale la pena examinar la consistencia entre los aspectos macro y micro, y la posibilidad de alcanzar las metas previstas. Mientras que en el nivel macro se acogen principios socialdemócratas: cobertura universal, un plan relativamente amplio y financiación solidaria, en el nivel micro se adoptan principios de tipo neoliberal: énfasis en la demanda, competencia y criterios de rentabilidad y eficiencia. Es decir, existe una tensión entre la búsqueda de la universalidad y solidaridad, por una parte, y la búsqueda de eficiencia, por otra; los componentes de la salud como bien meritario y bien público se contraponen al propósito de la eficiencia. Al final, los servicios de salud son insuficientes para la sociedad* <sup>188</sup>.

Hay más conceptos que apoyan esta tesis:

*A partir de una perspectiva que planteaba la progresiva y rápida afiliación, la situación económica ha impuesto un proceso más prolongado, y la experiencia ha planteado dificultades prácticas no previstas. Como resultado de esta dinámica, la proporción de afiliados al régimen subsidiado y al contributivo muestra una trayectoria decreciente. Esta situación llama a una readecuación de los criterios prácticos para determinar la población destinataria del régimen subsidiado en la fase de transición fijada por la Ley 100. En las nuevas circunstancias, mantener como prioridad en el aseguramiento subsidiado la continuidad en la afiliación de los ya inscritos se torna inequitativo e ineficiente* <sup>189</sup>.

Esta contradicción entre el derecho a la salud y la maximización de las utilidades de las partes y componentes del SGSSS, contenida en el diseño del sistema, tiende a generar resultados indeseables en el ámbito de la atención de la salud de los colombianos, que se hacen evidentes, en especial, por la cobertura parcial, exclusión, inequidad, baja calidad, ineficacia y rezago epidemiológico:

*Hay una paradoja: nunca antes la salud había tenido tantos recursos y nunca antes la salud había estado tan deteriorada. Los ganadores son los intermediarios, como las ARS, que son los que ganan.*

La idealización de la racionalidad que guía las interacciones entre las partes y componentes del SGSSS, en un mercado competitivo regulado, excluye el estudio de las circunstancias variables que generan continuamente incertidumbres que afectan el funcionamiento del sistema<sup>190</sup>. Esta situación no permite elaborar estrategias que posibiliten reducir las incertidumbres.

El Informe de Gestión de la Superintendencia Nacional de Salud reseña los resultados de la Cumbre de Secretarios de Salud, llevada a cabo el 13 de agosto de 2007. En él se destacan las dificultades, que, por ejemplo, el objetivo de universalización del acceso a la salud genera a las entidades territoriales:

188. Humberto Restrepo Zea y Sandra Rodríguez. "Diseño y experiencia de la regulación en salud en Colombia", en *Revisita Economía Institucional*, Universidad Externado de Colombia, Volumen 7, Número 12, primer semestre 200. p. 171.

189. Ministerio de la Protección Social - Programa de Apoyo a la Reforma en Salud; Universidad Nacional de Colombia. Facultad de Ciencias Económicas, Centro de Investigaciones para el Desarrollo (2007). *¿Ha mejorado el acceso a la salud?*, Impresol, Bogotá.

190. David Gauthier (1994). *La moral por acuerdo*, Gedisa, Barcelona.

*La universalización de la cobertura ha traído consigo problemas estructurales para las finanzas de las Entidades Territoriales porque a costa del aumento en la cobertura se genera una disminución de los estándares de calidad en la prestación de los servicios, por lo que se requiere un análisis y determinación del impacto de dicha universalización para establecer vías alternas* <sup>191</sup>.

Consistentemente con la lógica economicista y maximizadora que determina las interacciones del SGSSS, los afiliados y beneficiarios terminan actuando estratégicamente:

*Los cotizantes del régimen contributivo se están pasando al subsidiado por la exigencia de cotizar al sistema de pensiones, lo que ha generado la utilización de recursos que no estaban estimados* <sup>192</sup>.

Los entrevistados resumen la incidencia del factor financiero en el desempeño del sistema de salud de la siguiente manera:

*Todo esto es una cadena. Faltan recursos de la red, de la Secretaría, de todo. Al no tener recursos suficientes para dar atención a los usuarios no se les puede dar. Es muy triste decirle a un usuario “Mire, no hay cupos”.*

El flujo de los recursos dentro del sistema, y en particular las fracturas que se presentan en su transferencia desde el nivel central hacia el local, siguen incidiendo negativamente tanto en la satisfacción del derecho a la salud como en la presentación del servicio público. Al respecto, desde el nivel regional, y para el caso de la transferencia de recursos del Seguro Social, se anota que:

*... la respuesta seguirá relacionada con el gasto que hace el Seguro Social en el nivel central. Si el Seguro del nivel central no gira oportunamente los fondos, el Seguro regional no puede tampoco hacer lo propio oportunamente. El tema de disponibilidad presupuestal en este sentido limita la oportunidad de acceso al servicio de la salud.*

El énfasis en la búsqueda del equilibrio económico, financiero y administrativo del SGSSS y la maximización de las utilidades que rige las interacciones entre las partes y componentes del sistema afectan negativamente la asignación y distribución de los recursos. En palabras de los entrevistados:

*Una gran porción de los recursos de la salud se va para el tema de la contratación, y hay muchos recursos que son mal invertidos y que no generan un mejoramiento real en la salud de la comunidad. La promoción y prevención en salud se utiliza en contratación que no beneficia sino al contratista.*

---

191. José Renán Trujillo. *Informe de gestión 2006 – 2007*. Superintendencia Nacional de Salud, p. 14.

192. *Ibid*, p. 16.

**Por no transferir recursos para la salud y peculado por apropiación, destituido ex alcalde de Barbacoas (Nariño)**

**Bogotá, sábado 1º de marzo de 2008.** Con destitución e inhabilidad para ejercer cargos públicos por 20 años, la Procuraduría General de la Nación sancionó al ex alcalde del municipio de Barbacoas Nariño, Juan Carlos Quiñones Landázuri, por no transferir los recursos del régimen subsidiado en salud y darles destinación indebida.

Los hechos se registraron durante la vigencia 2003, cuando en su condición de alcalde omitió hacer las transferencias de 3.213 millones de pesos de los ingresos corrientes de la Nación, del Sistema General de Participación y del Fondo de Seguridad y Garantía en salud, Fosyga, para destinación específica a la contratación con las ARS con el fin de atender la salud de los habitantes de Barbacoas.

En fallo de primera instancia, la Procuraduría encontró también probado un segundo cargo, al establecer que Quiñones Landázuri, el día 9 de diciembre de 2003 giró un cheque por 85 millones de pesos a una cuenta corriente a nombre de Wílder Muñoz. Posteriormente, este cheque fue endosado al mismo alcalde Quiñones Landázuri, quien lo cobró el día 6 de enero de 2004, cuando su período como mandatario municipal había culminado.

Para el Ministerio Público es claro que el ex funcionario se apartó concientemente de su deber, pues tenía pleno conocimiento de su obligación de hacer las transferencias a las administradoras de salud y no lo hizo, incurriendo con ello en faltas gravísimas, una de ellas derivada del delito de peculado por aplicación oficial diferente.

La PGN aplicó la máxima sanción pues se trataba de un funcionario que ocupaba un cargo con jerarquía y mando dentro de un ente territorial, cuyo deber era comportarse bajo parámetros de rectitud y honestidad y cumplir con los compromisos adquiridos para atender la salud de la población del municipio de Barbacoas, altamente vulnerable por las enfermedades propias del trópico.

**Boletín 085 de 2008. Procuraduría General de la Nación**

[http://www.procuraduria.gov.co/html/noticias\\_2008/noticias\\_085.htm](http://www.procuraduria.gov.co/html/noticias_2008/noticias_085.htm)

### **Destituyen ex funcionarias de Dasalud Chocó por desviar recursos por 1.040 millones de pesos**

**Bogotá, 29 de febrero de 2008.** Farid Mosquera de Peña y Sally Rodríguez de Perea, en sus condiciones de ex directora y ex pagadora del Departamento Administrativo de Salud del Chocó (Dasalud), fueron destituidas de sus cargos e inhabilitadas para ejercer funciones públicas durante 15 años por dar destinación diferente a la establecida a 1.040 millones de pesos girados a la entidad realizando préstamos o traslados internos entre las cuentas en las que estaban depositados estos recursos.

En un fallo de primera instancia, el Ministerio Público consideró que las funcionarias conocían la normatividad contractual del Estado, la cual les obligaba a cumplir con los principios de transparencia y especialidad en la ejecución de los recursos asignados por el Ministerio de la Protección Social a Dasalud-Chocó y destinados a favorecer la salud de los sectores más pobres y vulnerables de la población de ese departamento, incurriendo en una falta disciplinaria descrita también como delito de peculado por aplicación oficial diferente.

Las señoras Mosquera de Peña y Rodríguez de Perea decidieron de manera voluntaria realizar los traslados y préstamos, para favorecer intereses funcionales diferentes a los establecidos legalmente, determinaron los miembros de una comisión especial disciplinaria, creada por el Viceprocurador Carlos Arturo Gómez Pavajeau para este departamento y que investiga presuntos hechos irregulares en Dasalud.

Las investigadas no actuaron de acuerdo con los deberes que su cargo les imponía. Por el contrario, procedieron mancomunadamente y en forma irregular a ordenar el traslado de unos recursos girados por el Ministerio de la Protección Social y a hacer efectivas órdenes de préstamo, afectando de esta manera el principio de legalidad administrativa en consideración a que los gastos ordenados por las entidades oficiales deben estar, necesariamente, sujetos a la correspondiente destinación y registro presupuestal, indicó el fallo emitido por el organismo de control.

En el fallo, la Procuraduría absolvió de responsabilidad disciplinaria al ex gobernador del Chocó, William Halaby Córdoba, al establecer que el ex funcionario sí cumplió con su deber de control y vigilancia de los recursos. El ex mandatario seccional incorporó los dineros girados al presupuesto de Dasalud y en los comités técnicos en los que participó estuvo pendiente de los informes presentados por la Directora de la entidad sobre la ejecución de los montos investigados, indicó el Ministerio Público.

**Boletín 085 de 2008. Procuraduría General de la Nación**

[http://www.procuraduria.gov.co/html/noticias\\_2008/noticias\\_083.htm](http://www.procuraduria.gov.co/html/noticias_2008/noticias_083.htm)

La discriminación que el diseño del SGSSS ha generado entre el POS contributivo y el POS subsidiado impone límites, en virtud de los recursos financieros requeridos para financiarlos. Esta situación produce efectos indeseados en la satisfacción del derecho a la salud y, como será expuesto en todo el numeral 4.2 de este capítulo y en el análisis presentado en el capítulo sobre la tutela, ésta se ha ido convirtiendo en el instrumento más efectivo para garantizar el acceso de los usuarios a los procedimientos que requiere su atención en salud:

*Hay otros casos en los que la tutela sí es necesaria. En casos donde se necesitan procedimientos que se salen del POS o el POSS (que ni la ARS ni la Secretaría pueden cubrir) en esos casos la gente necesariamente requiere la tutela, ya sea porque el medicamento es costoso o porque está en extrema pobreza. Tenemos muchos casos en donde el paciente sólo tiene que pagar el 5% de la intervención y ni siquiera eso alcanza a pagar...*

#### 4.1.1.5. Una estructura segmentada

La concepción mecánica, piramidal, centralizada y especializada que tiene el diseño de la estructura organizacional del SGSSS está generando conflictos internos y externos de adaptación a las particularidades que tienen los entornos en donde tiene que funcionar. Estos conflictos inciden negativamente en la posibilidad de lograr que los habitantes del territorio nacional tengan una atención de salud que sea consistente con sus derechos constitucionales. La información y la comunicación son elementos indispensables para el funcionamiento adecuado del SGSSS. Los flujos de información e intercambio en un sistema dependen del sentido que tenga el patrón de organización. Como el sentido del patrón de organización del sistema se reduce a considerar los aspectos económicos, financieros y administrativos, los datos diferentes a estos aspectos puntuales del funcionamiento tienden a no ser valorados, controlados y recuperados, con lo cual se generan situaciones de permanente desinformación y asimetría en el campo de la atención en salud.

El reducir los flujos de información y la comunicación a los aspectos económicos, financieros y administrativos del SGSSS no permite que se logre una orientación adecuada de los usuarios del SGSSS, que, en la mayoría de los casos, están desinformados o incomunicados. Según los entrevistados:

*Muchas de las tutelas que se presentan no deberían llegar porque llegan sin haber agotado la queja ante la misma entidad [...] En otros casos sí se ha agotado la vía administrativa pero en la mayoría de las veces no la agotan. Hay desconocimiento, no sé si voluntario o no, de la red hospitalaria y de las EPS subsidiadas. Nosotros tenemos contratos con ellos y anexos en donde les decimos cómo tienen que operar cuando un usuario requiere un servicio que no está en el POS [...] Si el usuario fuera bien orientado no habría tantas tutelas. En la falta de orientación también incide que el personal no es constante. Se hace por contratos de prestación de servicios de 3 y 4 meses, por lo que una capacitación dada a una persona se pierde porque hay gran movilidad.*

Las acciones, los procesos y procedimientos que organizan las actividades operativas de las partes y componentes esenciales de un sistema deben ser convencionalmente acep-

tados, formalmente establecidos y seguidos en todos sus pasos para garantizar que las acciones sean afortunadas<sup>193</sup>. Los datos oficiales, la información obtenida con las entrevistas, y el estudio de las quejas y tutelas nos demuestran que el SGSSS ha presentado múltiples problemas de convencionalidad, formalidad y seguimiento de los procesos y procedimientos que afectan la efectividad de las acciones de salud.

#### 4.1.2. Patrón de organización del sistema

##### 4.1.2.1. Dirección, regulación y control

Los problemas en la disponibilidad, accesibilidad, aceptabilidad y calidad de la atención en salud nos demuestran que la función especializada asignada para la parte y los componentes de Dirección y Regulación no está siendo adecuadamente realizada. Los intereses de corto plazo que tiene el tiempo gubernamental (cuatro años), principal agente responsable de la función especializada de dirección y control, producen inconsistencias prácticas que desvirtúan el sentido constitucional del derecho a la salud que deberían tener las acciones del sistema. La asignación de funciones, la intencionalidad colectiva y las reglas constitutivas configuran las acciones del SGSSS como institucionales<sup>194</sup>. Difícilmente las diferentes reformas estructurales y funcionales de las partes y componentes del SGSSS podrán modificar las problemáticas que genera la concepción inicial que orientó su diseño.

El tipo ideal de racionalidad económica competitiva que formalmente orienta las acciones individuales de los agentes del sistema, se contradice con la naturaleza institucional que de acuerdo con la Constitución debería producir el sistema respecto de las diferentes acciones de atención en salud. De esta forma, se presentan múltiples conflictos entre el interés individual –que dirige las acciones de las partes y componentes del SGSSS– y el interés colectivo<sup>19</sup> que propicia la Constitución al establecer el derecho a la salud que tiene la población. Los intereses individuales, racionales y egoístas, que fomenta el sentido económico del SGSSS contribuyen directamente al fracaso de la acción colectiva porque ellos actúan como “gorriones” o “parásitos” beneficiándose de los recursos que aporta el colectivo<sup>196</sup>.

La cobertura gradual (hoy indeterminada), las barreras de acceso que no se corrigen con las reformas del sistema, las demoras en los pagos, las diferencias en los afiliados, planes y los pagos, el control de costos para lograr el equilibrio financiero y la disminución de la calidad que se deriva de estos controles son, entre otros, algunos de los dispositivos que expresan la generación de conductas poco solidarias entre las partes y componentes que configuran al SGSSS. Las funciones especializadas de dirección y regulación, concentradas en el Gobierno Nacional, están sustentadas en la búsqueda del interés colectivo (cobertura universal y solidaridad) que se contradice con el interés privado (competencia, eficiencia

---

193. Austin, Ob. cit.

194. John R. Searle (1997). *La construcción de la realidad social*, Paidós, Barcelona.

19. Aguilar. Ob. cit.

196. Davis Morton (1998). *Introducción a la teoría de juegos*, Alianza, Madrid.

y rentabilidad) que delimita las funciones especializadas asignadas a las instituciones responsables por la financiación, administración y prestación de la atención en salud.

Los agentes responsables de la regulación y control del SGSSS confunden la cantidad y calidad idealmente esperadas con las efectivamente logradas de la atención en salud. Esta confusión incide negativamente en la selección, procesamiento, comprensión y difusión de la información necesaria para realizar sus funciones, porque no les permite establecer con precisión los efectos reales, negativos o positivos, que ha tenido el SGSSS. Lo mismo sucede en relación con la perspectiva de la salud concebida como un derecho humano:

*Es importante diferenciar la noción de salud como derecho, del concepto de salud como servicio público. Ambos enfoques son interdependientes. Ello significa que el sistema que garantiza los servicios de salud no puede desconocer la existencia y prevalencia del derecho a la salud. Es más, el servicio público de salud constituye la estrategia institucional encaminada a la realización del mencionado derecho* <sup>197</sup>.

Por otra parte, la acción de regulación y control del SGSSS implica reintroducir la información necesaria para evaluar si el sistema está produciendo el grado de orden esperado en el ámbito de atención de salud. El SGSSS ha presentado problemas de información relacionados con el volumen (sobreabundancia o escasez), la calidad (imprecisión, no pertinencia, accesibilidad) y la transmisión (velocidad, codificación y decodificación, verticalidad) de la información en los aspectos de la atención en salud. Estos problemas no permiten que el sistema obtenga la información necesaria para coordinar acciones (comunicación) que garanticen su funcionamiento adecuado, lo cual genera círculos viciosos durante su funcionamiento. Refiriéndose al sistema de referencia y contrarreferencia del SGSSS, los entrevistados mencionan:

*Si el sistema de referencia y contrarreferencia funcionara, el paciente sería atendido. Este sistema de referencia y contrarreferencia está regulado por una directiva del Ministerio de Salud*.

Un sistema mecánico, para funcionar como fue diseñado, requiere de la información y coordinación oportunas. Este hecho crea la necesidad de construir indicadores de seguimiento y control pertinentes con la finalidad del sistema. Los centros de decisión y acción del SGSSS reciben y transmiten la información sobre el nivel de los depósitos y los flujos monetarios necesarios que permitan mantener el equilibrio económico, financiero y administrativo del sistema. Pero la reducción de los depósitos y flujos de información a los aspectos económicos, financieros y administrativos del sistema no permite que los centros de decisiones regulen y controlen adecuadamente los aspectos relacionados con otros temas de la atención en salud, tendientes a garantizar la satisfacción del derecho a la salud. La Superintendencia Nacional de Salud y el Consejo Nacional de Seguridad Social en Salud, sustituido por la Comisión de Regulación en Salud, no parecen disponer de los datos, cuantitativos y cualitativos, necesarios para garantizar, mediante incentivos, que las administradoras y prestadoras actúen en función del interés colectivo:

---

197. Defensoría del Pueblo. *Derecho a la salud*, Bogotá, p. 36.

*Los actores institucionales detectan en mayor medida los problemas de acceso, mientras los actores sociales lo hacen respecto a la calidad y oportunidad en la prestación de servicios [...] El mecanismo de detección de problemas más eficiente es la recepción de quejas y reclamos; le siguen las presiones que el usuario hace en el momento de demandar el servicio y las denuncias públicas; los tres son recursos legales pero informales. La precariedad de otros mecanismos, como las encuestas, los sistemas de información y monitoreo, las visitas inspectivas y las bases de datos de afiliados en la detección de problemas, es evidente, así como las deficientes condiciones técnicas e institucionales para detectar las violaciones a los derechos de las personas, no permiten adelantar un control basado en la constatación de procedimientos y requisitos formales por parte de los actores del sistema* <sup>198</sup>.

La fragmentación del subsistema de inspección, vigilancia y control del SGSSS y su énfasis en los aspectos económicos, financieros y administrativos del sistema, no han podido corregir los conflictos que se producen en las partes de administración y prestación de servicios de salud. Los usuarios, afiliados o beneficiarios se quejan por el mal servicio, pero esto no genera ningún efecto que modifique su prestación. Según los entrevistados

*... En salud existen muchas entidades de control. La Personería, la Defensoría, la Procuraduría ejercen función de control. Eso hace que sea un control disperso y desordenado. Existen algunos controles que son inoperantes. Las oficinas de atención al usuario de las EPS son un fracaso ya que dependen de la misma entidad. El poder de incidencia que tienen es mínimo. Estas oficinas de atención al cliente, que existen en cada una de las entidades, son formas de dispersar el control. Un control debe ser independiente. Un control que depende de la misma entidad a la que se quejan no funciona. La gente no tiene conocimiento de cuáles son los órganos de control, por lo que no saben a dónde acudir ni ante qué situación .*

En consecuencia, las limitaciones que presenta el subsistema de inspección y vigilancia tanto a nivel interno, como incluso respecto de la labor cumplida por los órganos de control externo, en este caso el Ministerio Público, favorecen en parte el fortalecimiento de la jurisdicción de tutela como instrumento para alcanzar el acceso al derecho efectivo a la salud de los colombianos.

#### **4.1.3. Financiación y administración del SGSSS**

Uno de los propósitos fundamentales que llevaron a la creación del SGSSS colombiano era permitir que los recursos económicos del Estado se orientaran hacia los sectores problemáticos del país y a la población menos favorecida. Sin embargo, la presencia de regímenes excepcionales, la evasión, elusión y la no progresividad de las cotizaciones conducen a un menor recaudo de recursos, que afecta la financiación e impacta negativamente la solidaridad del sistema. Otro factor que influye en la financiación del SGSSS es la aplicación de un porcentaje igual de aportes para todos los rangos salariales. Esto

---

198. Ministerio de Protección Social – PARS, CID – Universidad Nacional, *Análisis de Inspección, Vigilancia y Control*, Bogotá.

significa que existe una contribución menor, relativamente, para el aseguramiento de aquellas personas con mejores ingresos salariales<sup>199</sup>.

En el campo administrativo, el SGSSS concentra su atención en la asignación de funciones especializadas para las partes y las instituciones que lo componen. Esto requiere de una organización administrativa basada en una operatividad secuencial consistente con el modelo de caja negra (una entrada, un proceso de transformación, un programa, una salida) económica, financiera y administrativa que tiene el SGSSS. En lo referente a la organización del trabajo, en el SGSSS se han presentado conflictos por un excesivo grado de división, un insuficiente grado de responsabilidad y una mínima posibilidad de trabajo en equipo. En lo relacionado con los procesos y procedimientos existe un grado de formalización excesiva y una actualización insuficiente que dificulta su seguimiento. Estos problemas generan una sucesión de actos desafortunados.

Como se observará en todo el numeral 4.2 de este capítulo, el interés individual y competitivo que dirige las estrategias y acciones de las instituciones que componen la parte administrativa, va configurando depósitos independientes y aislados de información, seleccionados de acuerdo con los intereses egocéntricos que tiene cada institución. Esta situación genera una imposibilidad de obtener la información completa que permita elegir, decidir y actuar en situaciones de certeza, como idealmente lo pretende el diseño del SGSSS. En consecuencia, el modelo ideal de competencia regulada que rige las interacciones de las instituciones responsables de administración y prestación de los servicios en el SGSSS, no ha dado los resultados esperados de libre concurrencia y mejora en la calidad de la atención en salud.

La regulación de la competencia, en el precio por la UPC y en servicio por el POS, que tiene el diseño mecánico del SGSSS, conduce a la necesidad de construir estrategias competitivas dirigidas a la reducción de los costos en la atención médica. La reducción de costos en la atención médica se hace posible introduciendo barreras a los afiliados del SGSSS, tendientes a maximizar las utilidades de las administradoras y las prestadoras de los servicios de salud. En este panorama competitivo del mercado regulado de la salud, la maximización de las utilidades de las EPS y las IPS es posible con una pérdida de la oportunidad, calidad y cantidad de atención médica que reciben los afiliados o beneficiarios del SGSSS y, en consecuencia, de la real garantía de goce del nivel más alto de bienestar físico y mental, es decir, del derecho a la salud entendido en términos de los estándares internacionales.

#### ***4.1.4. Prestación de los servicios en el SGSSS***

Las elecciones, decisiones y acciones de las instituciones responsables de la prestación de los servicios de salud se basan en la construcción de reglas para regir la competencia entre ellas destinadas a maximizar los beneficios particulares. Esta forma de proceder

---

199. Garay. Ob. cit. Este tema se abordó con más detalle en el capítulo 2 de este estudio.

contribuye a incrementar la desigualdad de la atención en salud porque, en el mercado de competencia regulada, la cantidad y calidad de la atención en salud que reciben las personas depende del régimen al cual ellas pertenezcan. Expertos en el tema de salud entrevistados señalan:

*Hay mínimo tres modelos de salud, y pueden existir muchos más, y todos muy distintos en su operación y con grandes dificultades para relacionarse, porque además están estructurados de manera completamente distinta. Así, existe un régimen contributivo que se diseña bajo una metodología del plan obligatorio de salud, un régimen subsidiado que tiene una metodología basada en la estructuración de un plan de beneficios para los mal llamados vinculados en el sistema.*

*El sistema de salud, al tener dos o tres regímenes con diferentes planes de atención, crea contradicciones fundamentales al principio de equidad. Por ello se tiene que ir barriendo de abajo hacia arriba para llegar a condiciones mínimas de equidad en el sistema, debido a que, hoy, los más desatendidos son los que no tienen acceso a nada, en tanto que el contributivo tiene un POS bastante elevado que no atiende a todos los miembros de la sociedad.*

El modelo de competencia regulada que orienta las acciones de los agentes que pertenecen al SGSSS estimula el que los intereses de las instituciones competidoras sean opuestos. Esto significa que en el juego competitivo que fomenta el diseño del SGSSS, las ganancias de algunas instituciones estén en función de las pérdidas de las otras. La concentración de la prestación de los servicios de salud y la administración en manos de pocas instituciones es un efecto consistente con el sentido competitivo.

El grado de equilibrio en el aspecto financiero del SGSSS contrasta con el desequilibrio de la competencia entre las EPS, IPS, y los usuarios. Este desequilibrio es aún más evidente en los afiliados al sistema. Las diferencias de la UPC para el régimen contributivo y subsidiado y la maximización de los beneficios que rige las interacciones entre las EPS y las IPS fomentan la utilización de tecnologías de bajo costo, la demora en los pagos y la demora en la prestación de los servicios, que deteriora la calidad de los mismos. Lo anterior es resaltado en las entrevistas realizadas:

*Como el Distrito no cumple con los pagos oportunamente, la (IPS) ha empezado a restringirles los servicios y les han empezado a interrumpir los servicios. Cuando llega un paciente dicen que no tienen camas pues saben que el recaudo es muy difícil pues el Distrito no paga. Algunos de esos casos están documentados por la Personería y por la Defensoría. Es muy difícil probar que no atendieron a una persona porque el Distrito no paga pues siempre dicen que no hay camas. El mayor tema es el económico.*

*Hay un gran problema que es el “paseo de la muerte”: en un solo mes murieron 7 personas. Se dice que la razón es que no hay camas, pero eso sólo es parcialmente cierto. Sí hay camas, pero como el Instituto le debe dinero a esas entidades, éstas no querían prestar el servicio y las personas se murieron en la puerta del hospital.*

#### 4.1.5. Los afiliados y usuarios del SGSSS

Para el SGSSS la atención en salud tiene un valor económicamente objetivo que, en la mayoría de los casos, se contradice con el valor subjetivo que tiene la salud para los afiliados y beneficiarios del sistema.

La continua interacción de los afiliados con el SGSSS y los resultados poco efectivos obtenidos con sus quejas administrativas, estimula su traslado hacia la vía judicial, en especial hacia la acción de tutela, que es considerada por ellos como el dispositivo de control que les reporta una mayor utilidad para resolver sus problemas de salud. En otras ocasiones, los problemas con las quejas se derivan de que no es utilizada adecuadamente por falta de información, consideración o inexperiencia. Según las entrevistas realizadas con funcionarios encargados de la atención al público, este tipo de situaciones se presenta mayormente en usuarios de bajos niveles socioculturales:

*En algunos casos [a] la gente con bajo nivel cultural o analfabetas se les redacta la queja [...] y ellos colocan su huella pues muchas veces no tienen firma.*

En el SGSSS se han venido presentando situaciones que en la teoría de juegos se denominan como “dilema del prisionero”<sup>200</sup>, en los que los participantes de un juego competitivo, dejándose llevar por su racionalidad egocéntrica, estratégicamente terminan seleccionando las opciones que les producen los peores resultados. Las conclusiones ofrecidas por el equipo de investigadores de la Universidad Nacional son significativas en este aspecto:

*Se hizo evidente la falta de comunicación entre las diferentes instancias comprometidas en la promoción de la participación y en el control social, situación que se refleja en la presencia de relaciones de naturaleza bilateral, es decir, sólo se conoce al interlocutor más directo [...] De manera similar, se encuentra un bajo nivel de relación entre las organizaciones comunitarias del sector y aun con los otros sectores. Esta estructura atomística de la participación se refuerza por el hecho de que las quejas individuales son el mecanismo de control más extendido, pero su tratamiento por parte de las distintas instancias del sistema no permite convertirlas en fuente de información para detectar problemas recurrentes o compartidos por distintos agentes, con lo cual tampoco se constituyen en variables que orienten las discusiones sobre la evolución del sistema en el municipio*<sup>201</sup>.

Como conclusión preliminar, se puede indicar que el estudio del SGSSS y su subsistema de IVC, demuestra que el modelo ideal con funcionamiento mecánico y racionalidad económica competitiva, que debía dirigir las acciones de las partes y componentes del sistema, no es coherente con los estándares internacionales relacionados con el derecho a la salud. El modelo seleccionado para la atención en salud, pese a tener mecanismos internos de compensación de las desigualdades de los usuarios del sistema, está funda-

200. Laszlo Mero (2001). *Los azares de la razón*, Paidós, Barcelona.

201. Ministerio de Protección Social - PARS; Universidad Nacional. *Régimen Subsidiado. Control Social*. Volumen VI. Documento consultado en la página electrónica: <http://www.minproteccionsocial.gov.co/pars/library/documents/DocNewsNo16197DocumentNo4277.PDF>.

mentado en una lógica excluyente y restrictiva en términos de la posibilidad de conseguir los niveles más altos de bienestar físico de la población. Además, presenta serios problemas de funcionalidad que acentúan las situaciones que vulneran el derecho a la salud y las deficiencias en la calidad del servicio.

A continuación presentamos un análisis del subsistema de Inspección, Vigilancia y Control, para identificar las razones teóricas y prácticas que impiden el control y ajuste efectivo de las actuaciones de las partes y componentes del sistema. En el mismo sentido, y partiendo del reconocimiento explícito de que un sistema de control en salud debe basarse en los principios de la prestación de un servicio público y la satisfacción de un derecho, se examinarán especialmente los efectos que tiene el trámite de quejas de los usuarios del SGSSS.

#### 4.2. El subsistema de Inspección, Vigilancia y Control

Las constataciones empíricas, provenientes de fuentes institucionales públicas y privadas, demuestran que el modelo ideal y mecánico que orientó el diseño del SGSSS no ha tenido la efectividad esperada. Lo mismo ha sucedido con el subsistema de IVC y las diferentes reformas que éste ha tenido. El reducir la complejidad<sup>202</sup> que por naturaleza tienen los fenómenos de la salud a los aspectos de la atención individual de la enfermedad y a la búsqueda de la eficiencia económica, administrativa y financiera de los recursos ha limitado las posibilidades de garantizar efectivamente el derecho a la salud.

Los reformadores, en la mayoría de los casos, no han considerado que los problemas de funcionamiento puedan ser señales de situaciones conflictivas subyacentes, que van más allá de los conflictos en la estructura o en el funcionamiento del sistema. La persistencia de las problemáticas en la atención de la salud nos habla de la necesidad de realizar un cambio profundo al sentido (patrón de organización) y a los procesos de aprendizaje (dispositivos de adaptación) que dirigen las acciones del SGSSS, para que el sistema logre satisfacer realmente el derecho a la salud.

El diseño del subsistema de IVC continúa siendo consistente con el marco conceptual y filosófico que orientó la construcción global del SGSSS. Según el Programa de Apoyo a la Reforma, PARS,

*... las entidades de supervisión, esto es, las encargadas de la inspección, vigilancia y control del sistema, deben garantizar que en todo momento se encuentran en real capacidad de cumplir las tareas que les son asignadas dentro del diseño y regulación del sector. Así, deben mantener los niveles de solvencia y, sobre todo, de liquidez requeridos para la pronta realización de los pagos a los prestadores de servicios; deben realizar las tareas concernientes a la contención de costos; deben asegurar que la prestación de los*

---

202. Rolando García (2006). *Sistemas complejos*, Barcelona, España.

*mismos se realiza dentro de los niveles de calidad y oportunidad deseados; deben vigilar de manera correcta que los prestadores de los servicios tienen la idoneidad requerida para operar dentro del sistema* <sup>203</sup>.

Como puede observarse, esta concepción del subsistema de IVC está adherida a los principios fragmentarios, económicos, financieros y administrativos que orientaron el diseño inicial del SGSSS, principios que, como se ha señalado previamente, han generado la mayoría de las problemáticas que limitan las posibilidades de cumplir con el derecho a la salud.

Adicionalmente, es conveniente mencionar que el modelo de salud colombiano ha sido diseñado utilizando la lógica piramidal de la teoría clásica de políticas públicas. Esta teoría pregonaba que la cima del sistema debe estar constituida por un número reducido de agentes responsables de construir las políticas, las cuales posteriormente son transmitidas, para su ejecución, a los demás agentes del sistema que también están organizados jerárquicamente para cumplir las funciones que el marco regulatorio ha previsto para tales efectos. En este tipo de modelo, las disfuncionalidades del sistema se entienden como un problema de aplicación, de puesta en marcha y ejecución por parte de los agentes, que en estos casos se desvían del cumplimiento de las actividades y los estándares previstos al efecto por la norma.

Para la teoría clásica de políticas públicas, la inspección y vigilancia se constituye en una herramienta de control, cumplimiento y sanción de las actuaciones por fuera de las normas por parte de los diferentes actores. En consecuencia, el IVC es el dispositivo encargado de garantizar que lo que en la teoría de las políticas públicas se conoce como el “implementation gap” –la brecha de ejecución–, la diferencia entre el “deber ser” que contiene la norma y el actuar cotidiano de los agentes, sea reducida y/o corregida. De esta forma, el diseño del IVC se enfoca en el desarrollo de distintas herramientas que procuren garantizar una capacidad de supervisión de la actuación de todos los agentes del sistema, según los parámetros que la misma regulación establezca.

La regulación del sistema determina los parámetros de funcionamiento y actuación de los agentes relacionados con la financiación, el aseguramiento, la prestación del servicio y las instituciones encargadas de poner en marcha el subsistema de IVC. Esta distribución se puede representar como se ve en el Gráfico No. 10.

El actual subsistema de IVC, con el cual se pretende monitorear y solucionar los problemas de funcionamiento del SGSSS, está dirigido preferentemente al seguimiento y control de la prestación eficiente del servicio público. No obstante y con base en la información obtenida, se puede demostrar que el subsistema de IVC sigue siendo débil en relación no sólo con la prestación de un servicio de alta calidad sino respecto a la satisfacción del derecho a la salud, porque a partir de su diseño inicial limita sus actuaciones a buscar una prestación adecuada del servicio. En consecuencia, las quejas presentadas

---

203. Ministerio de Protección Social – PARS. Proyecto de evaluación y reestructuración de los procesos, estrategias y organismos públicos y privados encargados de adelantar las funciones de inspección, vigilancia y control, p. 470. Documento consultado en la página electrónica:  
[<http://www.minproteccionsocial.gov.co/pars/library/documents/DocNewsNo16194DocumentNo4266.PDF>].

Gráfico 10. Diseño del subsistema de Inspección, Vigilancia y Control del SGSSS

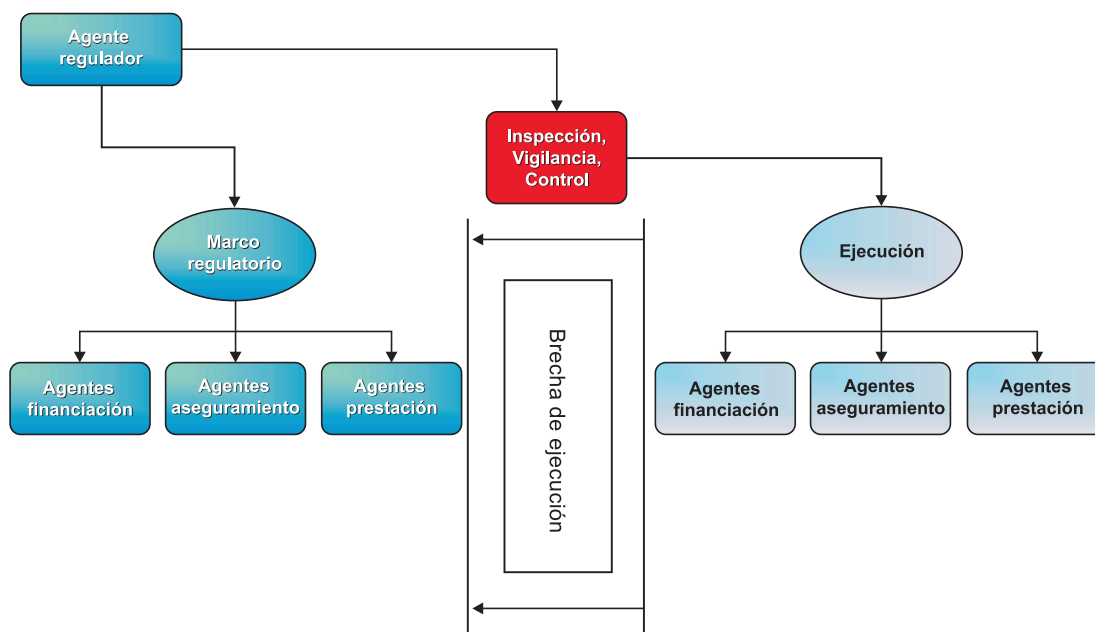

por los usuarios no son consideradas como un insumo para la transformación del sentido y el ajuste estructural del SGSSS, sino como reclamos individuales o casos aislados, a los que se les da un trámite individual de índole correctiva.

La poca interdependencia que por diseño mecánico tienen las partes y componentes del SGSSS, impide que las perturbaciones (expresadas en los conflictos y quejas) sean solucionadas a tiempo y va produciendo estados de inestabilidad crecientes. Las quejas que provienen del primer nivel del sistema han superado un umbral crítico, que no ha sido regulado por un segundo nivel (subsistema de IVC) para reorganizar la estructura. La linealidad de los procesos no permite describir los cambios en las dinámicas del sistema. Esto afecta negativamente la posibilidad de introducir las modificaciones necesarias para realizar acciones de atención en salud realmente efectivas que se adapten a las necesidades locales, regionales y nacionales.

El bajo nivel de apertura del SGSSS y la rígida estructura hacen que sea un sistema estático, porque cuando las situaciones del entorno, externo o interno (relaciones dentro del sistema), se modifican, no puede responder adecuadamente. La proliferación de quejas y tutelas hace manifiestos los problemas de evolución que responden a la imposibilidad formal de adaptarse y modificar las perturbaciones que se presentan durante su funcionamiento.

#### 4.2.1. Funcionamiento del sistema IVC para el trámite de quejas

En el diseño original concebido por la Ley 100 de 1993, las funciones de IVC al interior del SGSSS estaban concentradas principalmente en la Superintendencia Nacional de Salud y en las direcciones de salud de los entes territoriales. Junto a ellos también cumplen

funciones de IVC relacionadas, instancias como el Instituto Nacional de Vigilancia de Medicamentos y Alimentos (Invima)<sup>204</sup>, el Instituto Nacional de Salud (INS)<sup>20</sup> y los tribunales de ética médica<sup>206</sup> y odontológica<sup>207</sup>.

Manteniendo el sentido de organización del SGSSS, la Ley 1122 de 2007 se encamina a corregir los componentes estructurales y funcionales que a juicio de los reformadores están fallando. Con ella se busca, entre otros, una mayor participación ciudadana. Sin embargo, desde esta perspectiva correctiva, es probable que no se modifiquen sustancialmente las situaciones conflictivas que se han venido presentando durante el funcionamiento del sistema: los sensores tradicionales del SGSSS han demostrado que no se adaptan o no pueden modificar el medio ambiente del sistema.

La Ley 1122 de 2007 pretende que el trámite de quejas y el ejercicio del control ciudadano adquieran un nuevo impulso y para lograrlo crea el Sistema de Inspección, Vigilancia y Control del SGSSS “como un conjunto de normas, agentes y procesos articulados entre sí”<sup>208</sup>, cuya coordinación se entrega a la Superintendencia Nacional de Salud y deberá llevarse a cabo basándose, entre otros, en el eje de atención al usuario y participación ciudadana.

Gráfico 11. Ejes del Subsistema de Inspección, Vigilancia y Control

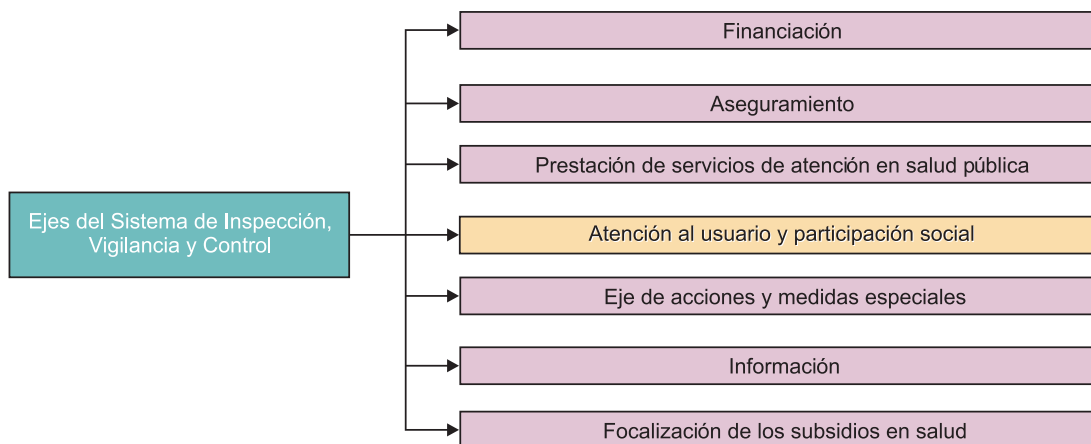

Sin embargo, el cierre organizativo e informacional de las partes y componentes del SGSSS, delimitado en torno a la búsqueda de conservar el equilibrio económico del sistema, no permite la participación significativa del usuario en el campo de las decisiones estratégicas del SGSSS. La reforma del 2007 busca un reconocimiento del usuario y de sus funciones de inspección, vigilancia y control en el SGSSS, pero, en la práctica, esta posibilidad tiene múltiples limitaciones formales que impiden su puesta en marcha.

204. Artículo 24, Ley 100 de 1993.

20. Reestructurado mediante el Decreto 272 de 2004.

206. Creado mediante la Ley 23 de 1981.

207. Creado mediante la Ley 3 de 1989.

208. Artículo 36, Ley 1122 de 2007.

En el diseño del SGSSS no existen canales reales que permitan a los individuos interactuar con el sistema. La función del usuario se limita a la presentación de quejas y solicitudes que, en la mayoría de los casos, no logran ser utilizadas como insumo para retroalimentación: las demandas de los usuarios no afectan el sentido o la estructura local o global del sistema. El modelo mecánico y trivial que tiene el SGSSS está orientado, en este sentido, a generar acciones predecibles, eliminando las situaciones (conflictos de funcionamiento) que generen impredecibilidad y novedad dentro del sistema. Además, la heterogeneidad de competencias, capacidades y procesos que tienen las instituciones y usuarios frente al trámite de quejas no permite transformar las limitaciones que el SGSSS genera en términos de garantía del derecho a la salud.

De acuerdo con la normatividad existente y con las entrevistas llevadas a cabo en las diferentes entidades, el siguiente aparte del informe buscará reconstruir el panorama del funcionamiento real del trámite de quejas en algunas de las instituciones que hacen parte del subsistema de IVC propio del SGSSS y también de las instituciones del Ministerio Público, que, sin hacer parte formal del IVC del SGSSS, reciben y tramitan quejas en salud.

#### **4.2.1.1. Superintendencia Nacional de Salud**

La Superintendencia Nacional de Salud –SNS– ha emprendido un importante trabajo de reorganización interna para apropiarse de las funciones de inspección y vigilancia que le asigna la Ley 1122 de 2007.

El reconocimiento de la participación ciudadana vuelve a ser uno de los ejes de trabajo de la SNS y este hecho ha llevado a la institución a replantear los procedimientos que hasta el año 2006 se estaban llevando a cabo respecto de la participación ciudadana. A partir del Decreto 1018 de 2007, se crea la Superintendencia de Protección al Usuario y la Participación Ciudadana. Bajo la misma lógica, la Superintendencia ha suscrito acuerdos con la Federación Nacional de Personeros y la Confederación Colombiana de Consumidores, procurando canalizar las quejas recibidas en el territorio nacional hacia la SNS. También ha puesto en marcha la estrategia de la Oficina Móvil de Atención, ha llevado a cabo audiencias públicas y mesas de trabajo, y ha realizado convenios con la Contraloría General de la República y la Procuraduría General de la Nación.

En la Superintendencia, el proceso de recepción y trámite de quejas sigue la ruta que se puede reconstruir, a partir de las entrevistas realizadas, como se ve en el Gráfico No. 11.

Este procedimiento reemplaza la actuación previamente desempeñada por la SNS en el trámite de quejas, que consistía en la remisión de éstas a las entidades señaladas por los quejosos, solicitando que la institución demandada a su vez remitiera la copia de la respuesta dada al usuario. Actualmente, la SNS recibe las quejas de los usuarios a través de los *call centers*, la página web y las llamadas telefónicas. Así mismo, atiende quejas interpuestas de manera personal por los usuarios, y las escritas, recibidas tanto de la ciudadanía como de otras entidades del subsistema de IVC y de las externas (PGN, Defensoría del Pueblo, Personerías, entre otras). Posteriormente a su registro, las quejas

son clasificadas por entidad demandada, momento a partir del cual comienza la gestión de la SNS. En general lo que sigue es convocar a la entidad cuestionada ante la Superintendencia y establecer compromisos de solución, con un término de respuesta de cinco días, dentro de los cuales las entidades deben contestar al quejoso con copia a la SNS. En caso de que el quejoso efectivamente reciba una solución a la queja interpuesta, el caso se archiva. De lo contrario, el caso es remitido por competencia a las diferentes delegadas al interior de la SNS.

Gráfico 11. Proceso de Trámite de Quejas de la SNS

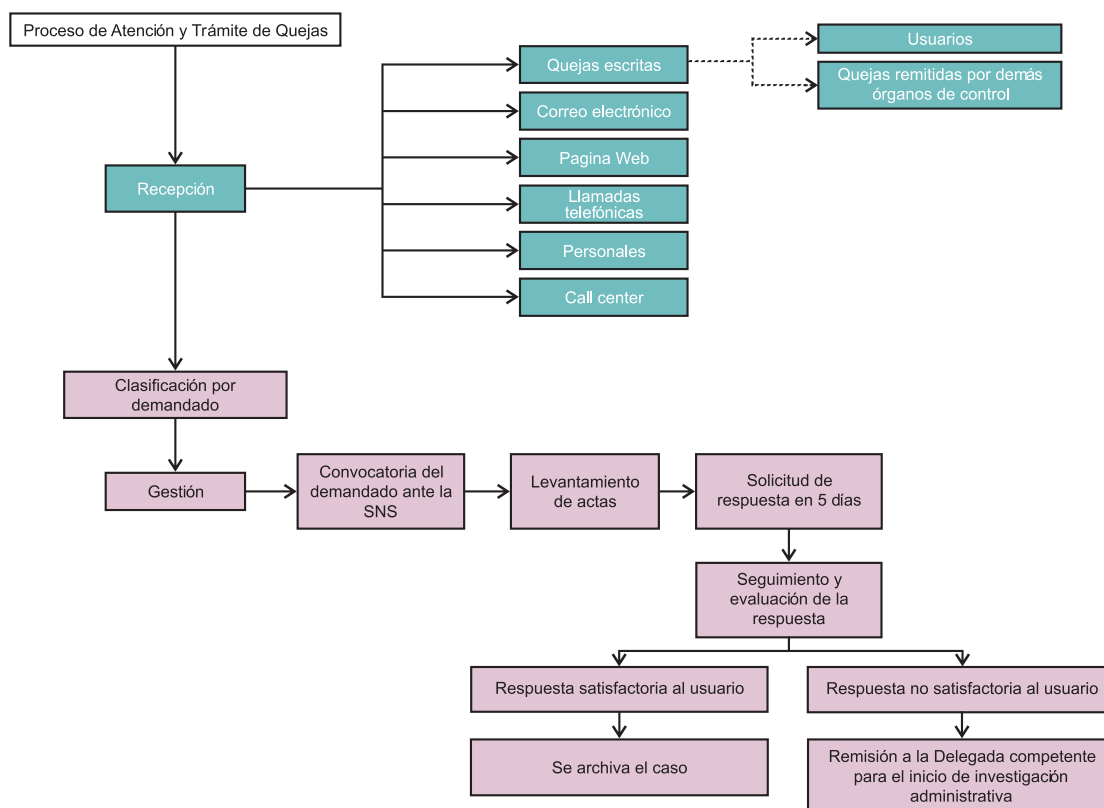

Si bien esta secuencia del trámite parece avanzar en la definición de un procedimiento unificado de trámite de quejas, según las entrevistas realizadas la SNS sigue presentado limitaciones para el ejercicio de sus funciones y para lograr el óptimo desempeño en el trámite de las quejas. Esto sucede porque, de un lado, la Superintendencia Nacional de Salud tiene presencia exclusivamente en el nivel central. Así mismo, las entrevistas realizadas en el nivel territorial confirman que, pese a los acuerdos suscritos con la SNS para canalizar quejas de todo el territorio nacional, las limitaciones de la Superintendencia continúan existiendo:

*Con la Superintendencia se tiene un problema porque es un organismo nacional que no tiene representación en lo regional [...] De esta manera, la Súper trata de resolver el problema concreto pero no resuelve el problema estructural.*

Otro problema que se presenta en el trámite de las quejas es la duplicidad. Se encontró que los usuarios interponen la misma queja ante varias instancias. Como se muestra en el Gráfico 11, la SNS recibe quejas escritas tanto de los usuarios como de otras entidades del subsistema, del nivel nacional y regional, y de las demás entidades, situación que puede generar una duplicidad de registros y gestiones, pues “muchas veces el usuario remite la misma queja a varias instituciones, incluyendo la SNS, las cuales a su vez remiten copia a la SNS, generando doble registro”.

También existe una notoria desarticulación entre los órganos de control, externos e internos, en el trámite de quejas. Este problema se hace evidente cuando se observa que la coordinación es más efectiva en el nivel central, pero queda rezagada la comunicación entre los diferentes órganos de control, internos y externos, del nivel regional. Los entrevistados de las entidades territoriales señalaron que en muy contadas ocasiones remiten quejas o compulsan copias de las quejas a la Superintendencia Nacional de Salud.

Por el contrario, en el nivel nacional, las Delegadas de la Procuraduría General de la Nación –PGN– que conocen quejas en materia de salud, señalan que remiten una copia a la Superintendencia Nacional de Salud y le hacen seguimiento.

*En la mayoría de los casos el trabajo de la Delegada es remitir la queja a la SNS y si ésta no responde la queja, entonces la Delegada hace seguimiento volviendo a preguntar sobre lo no contestado .*

En el mismo sentido se pronuncia la Delegada para la Vigilancia Preventiva de la Función Pública, quien resalta el Convenio que la PGN ha suscrito con la SNS:

*Ante el incumplimiento de normas del Sistema General de Seguridad Social en Salud – SGSSS, que por una parte afecta negativamente el desarrollo de la prestación y asistencia de los servicios de salud y las garantías y derechos fundamentales de las personas, y por otra, afecta los recursos del sistema, que inciden en la oportuna liquidación, cobro, giro y aplicación de los recursos provenientes de la explotación de los juegos de suerte y azar, de impuesto al consumo y producción de licores y cervezas y demás recursos destinados al sector de la salud, de manera que no se presente evasión y elusión de los aportes al SGSSS, la Procuraduría General de la Nación y la Superintendencia Nacional de Salud suscribieron un convenio de cooperación interinstitucional, para consolidar acciones de apoyo mutuo y coordinar actividades dentro del ámbito de sus competencias para obtener resultados efectivos en la prevención y sanción de la corrupción (María Fernanda Guerrero, Delegada para la Vigilancia Preventiva de la Función Pública, PGN).*

La desarticulación, incomunicación y duplicidad son el resultado de los conflictos en los flujos de información y comunicación que tienen las partes y componentes del sistema relacionados con el trámite de quejas. Los conflictos en los flujos de información y comunicación no permiten la construcción de dependencias mutuas entre los agentes del sistema, necesarias para garantizar el adecuado trámite de las quejas de los usuarios. La ausencia de vínculos entre los subsistemas no permite que las alteraciones se propaguen por el sistema para generar una reorganización total. Las actividades puntuales del sistema y los subsistemas de IVC no fueron intencionalmente concebidos como totalidades prioritariamente organizadas para lograr la adecuada prestación de la atención de la salud.

#### 4.2.1.2. Secretarías de Salud

Las entrevistas llevadas a cabo demuestran una marcada diversidad entre las secretarías de Salud en cuanto a los procedimientos de recepción, clasificación, trámite y archivo de quejas, aunque Bogotá tiene una de las más organizadas. El esfuerzo en el trámite de quejas de la Secretaría Distrital de Salud de Bogotá se inscribe en toda una política de carácter local y se espera que a partir de 2009, Bogotá cuente con un Sistema Único de Quejas para todas las entidades del Distrito, que pueda ser manejado a través de una página de internet. La necesidad de construir esta política local para el trámite de quejas, como la que se desarrolla actualmente en Bogotá, es una clara evidencia de los problemas que genera la naturaleza “idealista” que orientó el diseño mecánico del SGSSS.

El sistema no fue, ni teórica ni prácticamente, concebido para lograr una estabilidad dinámica<sup>209</sup> (disipativa) cuya estructura se adaptara a las condiciones fluctuantes o perturbaciones que pudiera llegar a tener. Los múltiples problemas operativos que tiene el trámite de quejas en el SGSSS son el resultado concreto de la concepción artificial del modelo ideal mecánico que guió su diseño. Este tipo artificial de diseño no permite la identificación (selección) y manejo (procesamiento) de los fenómenos aleatorios e irreversibles que son connaturales a fenómenos biológicos, como los que se presentan en la atención de la enfermedad. En contravía de lo natural, las intervenciones tradicionales del SGSSS se reducen a establecer formalmente los procesos y procedimientos para tramitar las quejas y establecer sanciones. Como puede observarse más adelante, estas acciones se realizan con la “esperanza” de corregir los conflictos de funcionamiento, pero en su aplicación presentan múltiples dificultades funcionales.

Actualmente la ruta de atención y trámite de quejas de la Secretaría Distrital de Salud de Bogotá, puede ser reconstruida de la manera que se muestra en el Gráfico 12.

Las quejas son recibidas por la Oficina de Atención al Ciudadano a través de correo electrónico, página web, llamadas telefónicas, o interpuestas personalmente por los usuarios en las oficinas de la Secretaría. Sin embargo, en el proceso de recepción pueden detectarse debilidades, en la medida en que algunas quejas no pasan por la Oficina de Atención al Usuario, sino que llegan directamente a las diferentes dependencias de la Secretaría. En consecuencia, se puede suponer la existencia de un subregistro de quejas. Posteriormente a la recepción, registro y clasificación de la queja (que para el caso de la Secretaría de Salud Distrital de Bogotá tiene definidas cuatro categorías: reclamo, derecho de petición de interés particular, derecho de petición en interés general y solicitud de información), la queja puede ser resuelta de manera inmediata. De lo contrario, es remitida por competencia dentro de la propia institución. Para el caso de la Dirección de Aseguramiento, a partir de la recepción de la queja, la Dirección requiere a la entidad demandada solicitando una respuesta sobre la situación consignada en la queja y hace seguimiento telefónico a la solución dada.

209. Ver Ilya Prigogine (1997). *Tan sólo una ilusión*, Tusquets, Barcelona,.

Gráfico 12. Proceso de atención y trámite de quejas de la Secretaría Distrital de Salud (Bogotá)

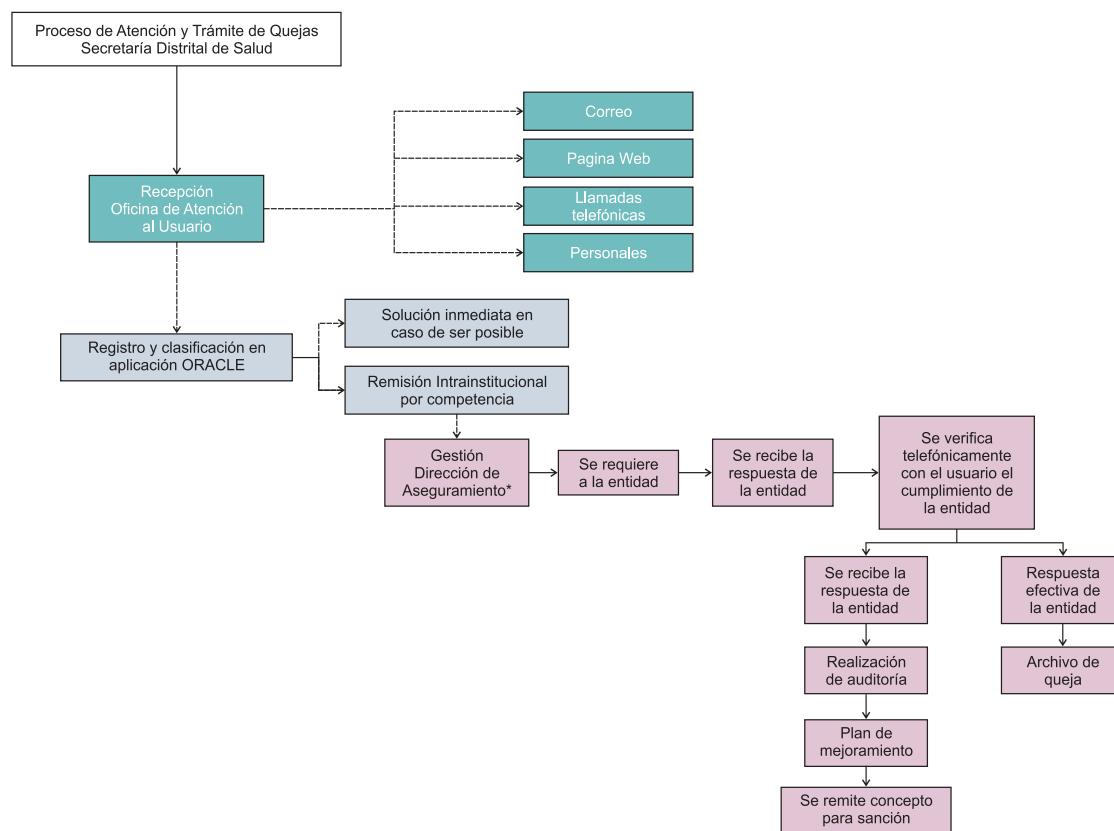

Como era previsible, este procedimiento estático tiene dificultades prácticas relacionadas con el registro y trámite formal de quejas y su posible capitalización para promover reformas profundas al SGSSS en procura de garantizar el derecho a la salud. En el caso de la Secretaría Distrital de Bogotá, las funcionarias de la Dirección de Aseguramiento sostienen que

*... muchas de las quejas llegan directamente a la Dirección de Aseguramiento sin pasar por Atención al Usuario, por lo que quedan fuera de la estadística. Es muy difícil hacer cortes totales de las quejas en razón a este problema* (Ana Isabel Guerrero y Janeth Vásquez. Dirección de Aseguramiento - Garantía de Calidad, Secretaría Distrital de Salud de Bogotá).

Dado que la mayoría de las quejas están relacionadas con la calidad de los servicios prestados, la dirección encargada de resolver las quejas es la Dirección de Aseguramiento, que a su vez se subdivide en Garantía y Calidad, Atención al Vinculado y Administración de Aseguramiento.

En Pereira, a su turno, a partir de las entrevistas realizadas, la ruta que pueden estar agotando las quejas ante la Secretaría de Salud de Pereira puede sintetizarse en el Gráfico 13.

Gráfico 13. Proceso de Trámite de Quejas de la Secretaría de Salud de Pereira

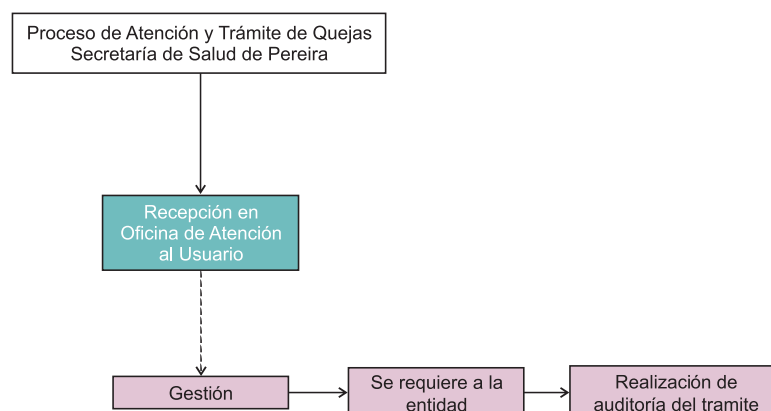

El exceso de fragmentación estructural y funcional, producto de la independencia de las partes y componentes del SGSSS, reduce el estudio de los problemas a un estado específico (calidad, cobertura, sanciones, etc.) y no a la dinámica total del sistema. Esta reducción local produce dificultades para aplicar sanciones a las entidades que, de acuerdo con las quejas, no estén cumpliendo con las normas definidas por el sistema. Según la Secretaría Distrital de Salud de Bogotá, estas limitaciones se deben a la demora en los procesos y a la falta de claridad de las competencias sancionatorias, percepción del problema que demuestra la reducción estructural y funcional del problema propia del diseño del sistema.

La imposición de sanciones derivadas de las quejas es considerada como un proceso complicado y con limitaciones en cuanto a su claridad normativa:

*En general son muy demoradas de imponer porque tienen un proceso muy largo. Por otro lado, existe una dualidad normativa porque hay que definir si la Secretaría es competente o no para imponer multas a las EPS. Eso depende de un concepto de la oficina de Jurídica de la Alcaldía. Había un número creciente de actos administrativos que estaban a punto de salir, que tuvieron que detenerse por la falta de claridad en la competencia. Esto es grave porque el ente territorial perdería mucha autoridad y rectoría para controlar a las EPS.*

Esta ausencia de claridad en las competencias de los entes territoriales y sus alcances respecto de las actividades relacionadas con el subsistema de IVC también se pusieron de manifiesto en otros espacios, como el de la Cumbre de Secretarios de Salud, convocada por la Superintendencia Nacional de Salud:

*Las funciones del IVC de los entes territoriales no están claramente definidas, lo que no permite determinar su alcance con el propósito de generar acciones de impacto y ejercer las funciones que les han sido asignadas a cabalidad* <sup>210</sup>.

210. Jose Renán Trujillo. *Informe gestión Superintendencia Nacional de Salud 2006 – 2007*, p. 1.

Los secretarios de Salud coincidieron en afirmar que existe descoordinación con las demás entidades de IVC de carácter interno al SGSSS y las otras de carácter externo; también señalan la falta de claridad de las funciones de IVC propias de las secretarías; en relación con las acciones de tutela, destacan el desconocimiento de los jueces de las competencias de los entes territoriales, por lo cual a veces terminan involucrados en reclamaciones que exceden el ámbito de sus funciones legales.

#### **4.2.2. Funcionamiento de los agentes externos de control**

Los múltiples problemas que tiene la estructura interna de regulación y control del SGSSS para la resolución oportuna de las quejas, llevan a los usuarios a buscar otras instancias externas que les resuelvan los conflictos que se presentan en el acceso o durante la atención en salud. Esta situación expresa la existencia de problemas de coherencia interna entre las partes y componentes del sistema, porque, entre otras razones, no existen relaciones necesarias entre ellos que garanticen un adecuado control.

Los procesos formalmente establecidos por el diseño no son capaces de describir y analizar los cambios y perturbaciones locales y globales que se están produciendo al interior del sistema. Los diferentes niveles del SGSSS están desacoplados. Por esa razón, la solución de conflictos requiere de la participación de agentes externos y aquí el Ministerio Público ocupa un lugar preponderante, que recoge las alteraciones que está produciendo el SGSSS y que se propagan al medio ambiente.

##### **4.2.2.1. La Procuraduría General de la Nación**

Frente a las quejas en materia de salud, la actuación de la Procuraduría General de la Nación proviene de sus competencias en el ámbito preventivo y/o disciplinario.

Esta intervención presenta algunas diferencias en el tipo de respuesta generada en los niveles territorial y nacional, que se sintetizan en: el procedimiento de recepción; el nivel de formalidad, registro y archivo de las quejas; la concurrencia de competencias disciplinarias y preventivas en lo regional, a diferencia de la especialización de dichas funciones en el nivel nacional; y en la articulación con otras entidades del Ministerio Público, la Defensoría del Pueblo y las Personerías, y con las demás entidades de control internas y externas la SGSSS. El proceso de trámite de quejas en la PGN en el orden territorial se puede sintetizar en el Gráfico 14.

En el nivel regional, según las entrevistas realizadas, no existe un protocolo único que sigan las Procuradurías respecto de las quejas recibidas y tramitadas en materia de salud. Sin embargo, de manera general la recepción de las quejas se hace a través de llamadas telefónicas, atención personalizada a los usuarios y recepción de quejas escritas, provenientes tanto de los usuarios como las remitidas por otras entidades de control. A partir de la recepción de la queja, los funcionarios proceden a definir la urgencia del caso. Si se

trata de una situación de urgencia manifiesta los funcionarios señalan que, generalmente resuelven la situación de manera inmediata, es decir, a través de llamadas telefónicas a las entidades demandadas, procedimiento que se facilita en los municipios pequeños. Así mismo, en algunas ocasiones, frente a la urgencia manifiesta, el usuario puede ser acompañado hasta la entidad presuntamente responsable de la afectación del derecho. No obstante, la urgencia manifiesta también puede ser solucionada a través de trámites ordinarios, es decir, requerimientos formales a las entidades.

Gráfico 14. Proceso de Trámite de Quejas de las Procuradurías del orden territorial

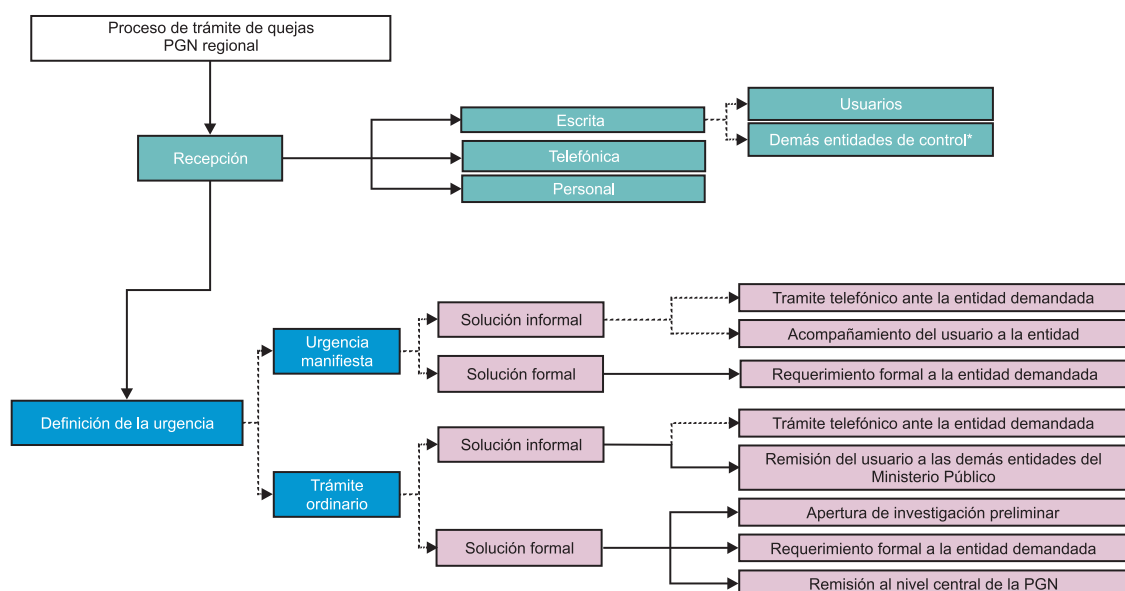

Según la información obtenida, el trámite de las quejas en las regiones suele presentar mayores niveles de informalidad, en la medida en que se logran resolver problemas específicos vía telefónica, con lo cual se omite el registro de la queja o su trámite. Según los entrevistados:

*Dependiendo de la posibilidad que tenemos, actuamos. Si vemos que eso se soluciona con una llamada, entonces lo hacemos. Por ejemplo si se requiere una orden de servicios entonces se hace la llamada y en ese caso se actúa preventivamente.*

Lo anterior permite concluir que algunos de los problemas en el trámite de las quejas que llegan a la PGN es la falta de un protocolo único de trámite de quejas y la informalidad en su solución. Así mismo se hace evidente la necesidad de una mayor coordinación entre el nivel nacional y regional en el tema de trámite.

En el nivel central, siguiendo los datos obtenidos en las entrevistas, una de las dificultades en la recepción y trámite de quejas se debe a la ausencia de un criterio para el reparto de quejas por competencia entre las Delegadas del ámbito preventivo y disciplinario. Frente a estas dificultades se han adoptado acciones como las señaladas por los entrevistados:

*La Procuraduría Delegada para la Vigilancia Preventiva de la Función Pública, observó algunas dificultades en el reparto de las quejas en materia de Salud (Ley 100 de diciembre 23 de 1993) por parte del CAP y para evitar dualidades en la intervención y función preventiva con otras dependencias, entre ellas, la Delegada para Descentralización y las Entidades Territoriales, Delegada para los Asuntos del Trabajo y la Seguridad Social, Delegada para los Derechos de la Infancia, la Adolescencia y la Familia, y las Procuradurías Regionales, Distritales y Provinciales, dispuso de un acuerdo para darles el trámite y orientar su competencia (María Fernanda Guerrero. Delegada para la Vigilancia Preventiva de la Función Pública. PGN).*

Para el caso de la función disciplinaria, la distribución de las denuncias recibidas entre las Delegadas también suele presentar dificultades. Según el registro GEDIS, para el año 2006 las denuncias en materia de salud han sido puestas en conocimiento de los Asesores del Despacho en Derechos Humanos, la Procuraduría Delegada Primera ante el Consejo de Estado, la Delegada del Ministerio Público para Asuntos Penales, la Dirección Nacional de Investigaciones Especiales, la Viceprocuraduría, la Delegada para la Vigilancia Judicial y Policía Judicial, los Asesores del Despacho en Contratación, la Procuraduría Primera en Contratación Estatal, el Despacho del Procurador, la Delegada para la Policía Nacional, la Delegada para la Moralidad Pública, la Delegada para la Economía y la Hacienda, la Delegada para las Fuerzas Militares, la Procuraduría Primera y Segunda para la Vigilancia Administrativa y las procuradurías regionales y provinciales.

Adicionalmente, en el nivel central se mencionan algunas dificultades de articulación intrainstitucional entre las Procuradurías del orden territorial y las Delegadas del nivel central en cuanto al trámite de quejas en salud. Estas se refieren a la falta de unidad de criterio respecto de la competencia que tiene la PGN, como órgano de control, frente a los agentes privados que desempeñan actividades dentro del sector de la salud, situación que se genera a partir de los cambios legislativos y jurisprudenciales. Al efecto, en el nivel central se han emprendido gestiones como las que mencionan los entrevistados:

*Como no se advertía por parte de la Procuraduría General de la Nación la debida claridad sobre el régimen disciplinario aplicable para investigar a los representantes legales de las Empresas Promotoras de Salud del régimen subsidiado –EPS– (anteriormente Administradoras del Régimen Subsidiado –ARS–), se consultó a la Procuraduría Delegada para Asuntos Disciplinarios para absolver este interrogante, resultando que si la EPS maneja recursos públicos, su representante legal será sujeto disciplinable conforme el artículo 53 de la Ley 734 de 2002, y en aplicación del criterio para determinar si dicho representante legal es sujeto disciplinable o no, expuesto por el Consejo de Estado de fecha 18 de noviembre de 1970, labor [de la] que se ocupará en cada caso el operador disciplinario al entrar a analizar las actividades que desempeña el particular. (María Fernanda Guerrero. Delegada para la Vigilancia Preventiva de la Función Pública. PGN).*

Finalmente, para los funcionarios de la PGN, la articulación con las demás entidades de control del Ministerio Público, y las demás entidades del subsistema de IVC propias del SGSSS, resulta muy débil, lo que también favorece la duplicidad en los trámites:

*Lo ideal sería tener un sistema unificado para que la persona no tenga que interponer una misma queja tres veces en distintas entidades. Además, las tres entidades pedimos lo mismo (historia clínica, etc.) lo que dificulta el acceso.*

#### **4.2.2.2. Defensoría del Pueblo**

La información recopilada relacionada con el trámite que lleva a cabo la Defensoría del Pueblo acerca de las quejas demostró ser una de las más estandarizadas. En este sentido, la entidad cuenta con un Manual de Atención de Quejas que define los procedimientos que los funcionarios del nivel central y regional deben seguir para recibir, atender, tramitar y hacer seguimiento a la queja recibida:

*Los funcionarios en las regiones son considerados como unidades, en la medida en que deben desempeñar y tener la experticia para la atención de todo tipo de quejas y con capacidad de dar el trámite pertinente en la región. Esto, debido al tamaño reducido de funcionarios en terreno, quienes, a diferencia de Bogotá, no pueden contar con una especialización de funciones tan marcada, donde sí se cuenta con diferentes delegadas y dependencias estrictamente delimitadas y en constante articulación. Para el caso de atención de quejas, la Defensoría cuenta con un software que permite circunscribir el hecho y garantizar el trámite correspondiente.*

Gráfico 1. Proceso de trámite de quejas de la Defensoría del Pueblo <sup>211</sup>

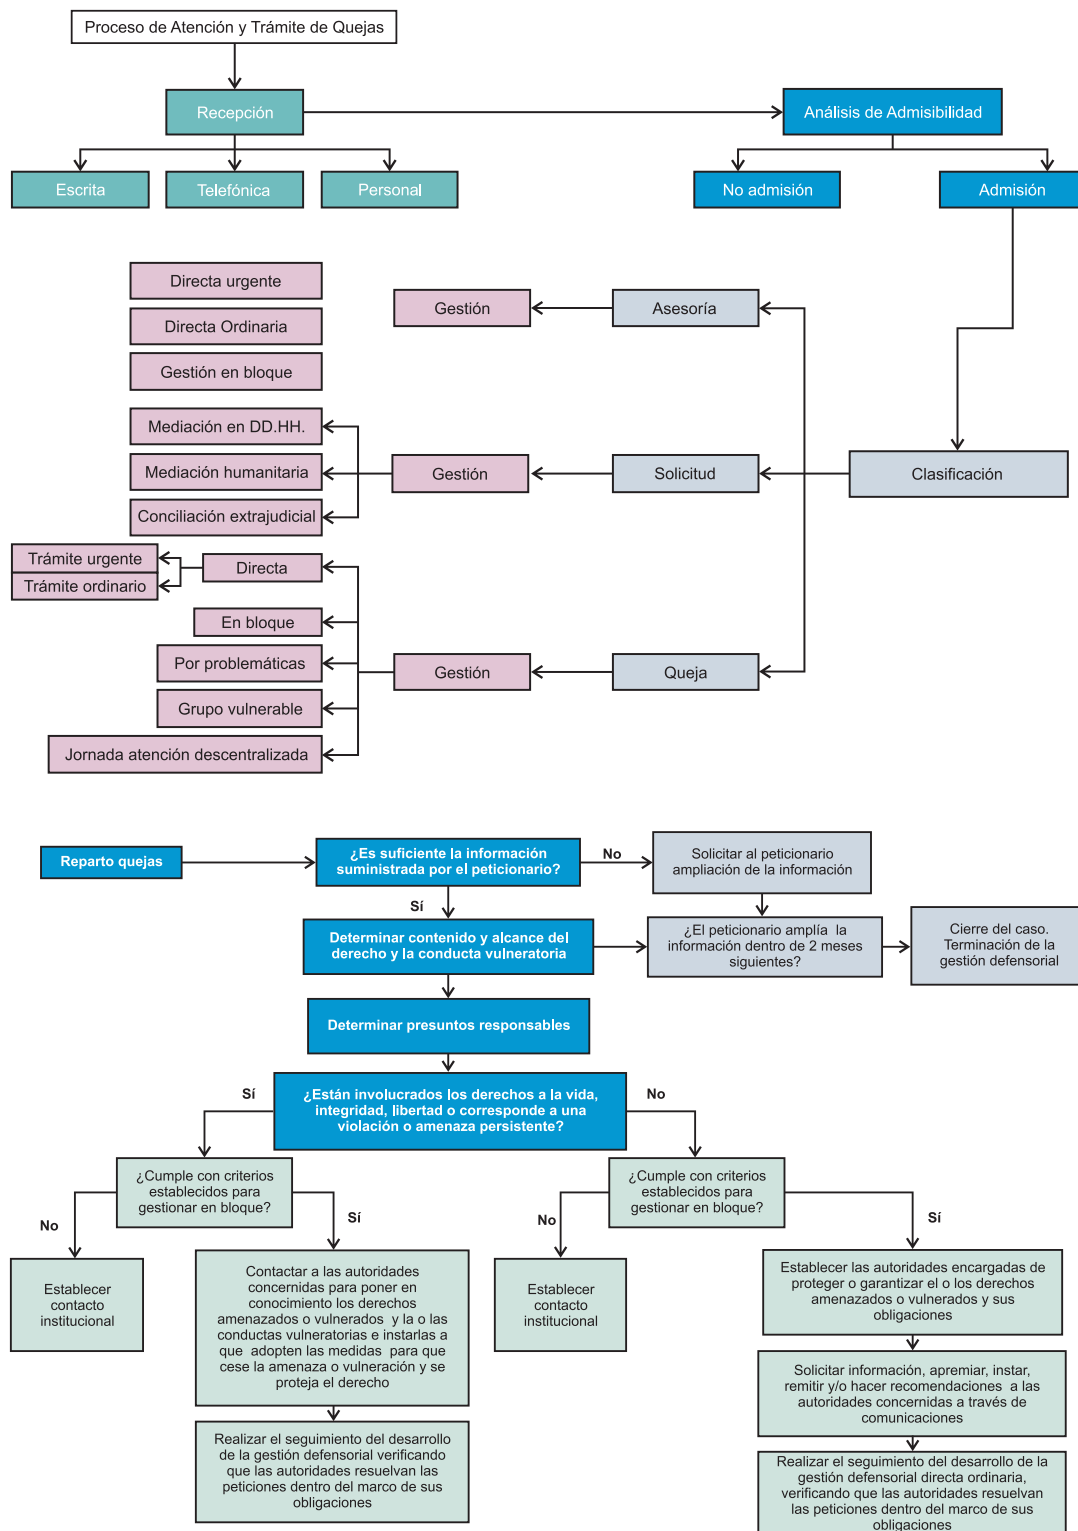

211. Reconstruido a partir del Manual de Procedimientos de Atención y Trámite de Quejas de la Defensoría del Pueblo.

### 4.2.2.3. Personerías

La información obtenida demostró que las personerías municipales, inclusive la de Bogotá, tienen diferencias en: procedimiento de recepción, clasificación, trámite de quejas, asesoría en materia de presentación de acciones de tutela, archivo y capacidad institucional para llevar a cabo las funciones y las consiguientes adaptaciones que cada entidad crea para cumplir con sus obligaciones. En general el trámite de las quejas obedece a la secuencia de recepción y posterior oficio a la entidad denunciada para que dé respuesta. Si responde adecuadamente el caso concluye, pero en algunas ocasiones, si es necesario, se programa y realiza una visita a la entidad o establecimiento denunciado con el fin de verificar los hechos descritos por el quejoso. En algunos casos, luego de realizar la visita se ordena la adopción de los correctivos pertinentes, frente a lo cual se hace un seguimiento. En ocasiones también se hace remisión a otras dependencias<sup>212</sup>.

Gráfico 16. Proceso de trámite de quejas en las Personerías Municipales

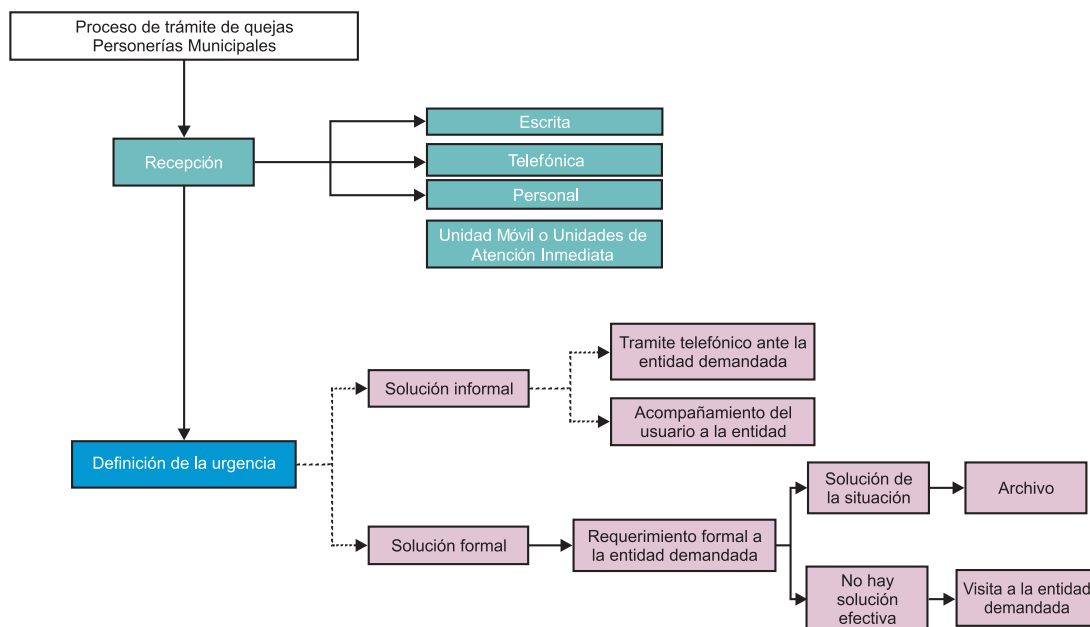

Las personerías, en general, están desarticuladas y tampoco tienen capacidad de incidencia en la formulación, o reformulación, de la política pública. Los resultados de las entrevistas llevadas a cabo lo confirman:

*Hay un grupo de atención inmediata que se comunica vía Avantel. Llega la información porque la persona se acerca directamente o por los medios de comunicación. El grupo de atención inmediata se traslada al sitio donde hay una necesidad y se hace*

212. En la muestra aleatoria analizada de quejas tramitadas por la Personería de Bogotá, se pudo identificar que algunos de los temas de queja frecuente por parte de los usuarios son: la no autorización de la EPS privada para el traslado de un paciente, la no autorización para un cambio de IPS a pesar de las dificultades de acceso por la ubicación lejana de la institución, no autorización de cirugías por parte de la EPS, desafiliación del sistema, y desacatos al cumplimiento de acciones de tutela que ordenan procedimientos medico-quirúrgicos.

*el requerimiento a la entidad verbalmente; si hay tiempo se hace el requerimiento por escrito. Si la entidad no presta atención, la Personería coadyuva en la tutela* .

Otro testimonio muestra también el estado actual de estos trámites:

*La gran mayoría de denuncias son verbales. Eso no se tramita como queja sino como coadyudancia o acompañamiento en un proceso. Luego se hace el requerimiento a la entidad.*

Las similitudes de los conflictos identificados en las diferentes instituciones externas de control, relacionados con el trámite de quejas, nos confirman que la naturaleza fragmentaria, mecánica y aislada que tienen las partes y relaciones del SGSSS y su subsistema de IVC, interno y externo, no le permiten interactuar adecuadamente con el entorno, y limitan sus capacidades para garantizar la realización de acciones que permitan ofrecer una atención en salud que sea coherente con el derecho a la salud. Esta situación demuestra que el funcionamiento adecuado del sistema no puede seguir estando en función de sus partes y componentes tomados de manera aislada. Además, desvirtúa la pretensión de establecer relaciones lineales (causa-efecto) sustentadas en la asignación de funciones especializadas.

Los problemas identificados comprueban que las condiciones del contexto imponen restricciones, indirectas y directas, al sistema que no fueron tenidas en cuenta durante su diseño. También es conveniente destacar que las condiciones iniciales establecidas durante el diseño imponen barreras a la viabilidad de las soluciones que hasta el momento han sido planteadas en las reformas. Las medidas correctivas han sido desafortunadas porque se originan en un diagnóstico deficiente de la situación de salud en Colombia, que no profundiza en las situaciones y las reduce a los aspectos superficiales de la problemática.

Esta superficialidad está claramente mostrada en la identificación, explicación y comprensión de un problema y en las acciones emprendidas para resolverlo, que dependen del marco de referencia de las personas encargadas de definirlos<sup>213</sup>. El diseño y las reformas al SGSSS nos demuestran que los conflictos han sido interpretados como defectos de funcionamiento, lo cual trae consigo el desarrollo de intervenciones de tipo *correctivo*. Ninguna de estas medidas correctivas insinúa la necesidad de un cambio radical en la concepción del modelo ideal que orientó el diseño del sistema.

La continuidad de esta actitud *correctiva* implica que existen dificultades en la percepción de los problemas por parte de los agentes responsables del adecuado funcionamiento del sistema, especialmente si vinculamos esta actitud con la posibilidad de garantizar el derecho a la salud que tienen constitucionalmente los colombianos. Aferrados al presente, los responsables del SGSSS no logran percibir el futuro de la atención en salud de los colombianos. Para este tipo de perspectiva, el concepto de cambio resulta inconcebible porque éste generalmente implica una ruptura con la tradición y con el pasado. La dificultad para evaluar los mecanismos reguladores del SGSSS en un mundo cambiante no permite elaborar diagnósticos adecuados acerca del funcionamiento que ha tenido el sistema.

---

213. David Deutsch (1999). *La estructura de la realidad*, Gedisa, Barcelona.

## CAPÍTULO 5

### Acción de tutela: ¿una alternativa de acceso al goce del derecho?

El propósito de este capítulo consiste en analizar de qué manera la acción de tutela ha desempeñado un importante papel en la garantía del derecho a la salud para los colombianos, y se ha convertido en un mecanismo privilegiado para enfrentar los problemas de acceso a los servicios y las limitaciones del funcionamiento del subsistema de inspección, vigilancia y control del SGSSS<sup>214</sup>. Para ello el análisis se ha dividido en tres partes. En la primera se hará una presentación general del tema, mostrando por una parte el funcionamiento de la acción de tutela en relación con el derecho a la salud a partir de los criterios establecidos por la jurisprudencia de la Corte Constitucional; por otra, las principales conclusiones ofrecidas por estudios que han analizado desde distintas perspectivas el comportamiento de dicha acción constitucional; y además el análisis detallado de una muestra aleatoria de sentencias de la Corte Constitucional proferidas entre 2002 y 2006<sup>21</sup>. En la segunda parte se presenta y desarrolla una de las hipótesis que ha guiado la presente investigación y que tiene que ver con la manera como la tutela se ha convertido en un mecanismo de uso frecuente para el acceso al derecho, que funciona como una “válvula de escape” frente a las limitaciones propias de los mecanismos de control administrativo, lo que ha generado que se acuda al recurso judicial para obtener la satisfacción del derecho o la solución de requerimientos que no se logran resolver adecuadamente a través de las vías administrativas, ni por las instituciones aseguradoras y prestadoras de los servicios, ni por las entidades que conforman el sistema de vigilancia y control propio del Sistema General de Seguridad Social en Salud, como la Superintendencia Nacional de Salud o las direcciones seccionales, distritales y locales de salud, ni por los organismos que conforman el Ministerio Público<sup>216</sup>. Los ciudadanos, gracias a la acción de tutela, han logrado entonces la satisfacción de su derecho, y en esa medida es necesario señalar los impactos positivos de esta acción. Pero el uso masivo de la tutela en salud ha generado también una serie de problemas y ha merecido una amplia gama de críticas desde diversos sectores, sobre las cuales es pertinente ofrecer algunas reflexiones. En la tercera parte se abordan las respuestas institucionales dadas a

---

214. Esto se ilustró en el capítulo anterior.

21. En total se revisaron 13 sentencias, de las cuales 66 correspondían a casos relacionados con reclamos por el derecho a la salud.

216. La descripción de las funciones de estas entidades en materia de IVC se hizo en los capítulos precedentes.

los problemas planteados, que han avanzado básicamente en tres vías. Por una parte se han propuesto modificaciones normativas que buscan reducir el ámbito de incidencia de la tutela en materia de derechos sociales y particularmente en relación con el derecho a la salud; por otra parte se ha propuesto reorganizar las competencias para la tramitación de estos asuntos, tanto a través de la tutela como mediante el establecimiento de una jurisdicción especializada de seguridad social; finalmente, se han generado propuestas y reformas encaminadas al fortalecimiento de las instancias encargadas del control (v.g. la atribución de funciones jurisdiccionales a la Superintendencia en la Ley 1122/07) y otros ajustes que buscan el mejoramiento en el funcionamiento de los canales alternativos a lo judicial para la defensa del derecho.

### 5.1. La acción de tutela y la garantía del derecho a la salud

La Corte Constitucional ha considerado que la salud es un derecho de carácter prestacional y un servicio público sujeto a la regulación del Estado. Por ello, el derecho a la salud, en principio, no se considera un derecho fundamental de aplicación inmediata y susceptible de ser exigido judicialmente mediante la acción de tutela. Sin embargo, también ha indicado la Corte que el carácter fundamental de un derecho no está determinado a priori y no depende “exclusivamente de la ubicación del artículo que lo consagra dentro de los títulos y capítulos de la Constitución, sino ante todo de su contenido material”<sup>217</sup> y por ello debe evaluarse en cada caso concreto. Es así como el desarrollo de la jurisprudencia en las numerosas sentencias proferidas en ejercicio de la facultad de revisión de las decisiones judiciales de tutela<sup>218</sup>, ha permitido la definición de tres supuestos, en los cuales el derecho a la salud puede entenderse como un derecho fundamental y por lo tanto susceptible de ser protegido mediante la acción de tutela<sup>219</sup>.

El primer supuesto es el que se presenta cuando es posible establecer conexidad entre el derecho a la salud y otros derechos fundamentales. En estos casos, un derecho que en principio no tiene el carácter de fundamental puede ser considerado como tal por su estrecha relación con aquél. La tesis de la conexidad fue esbozada por la Corte Constitucional para la protección de derechos sociales desde los inicios de su labor y luego se fue consolidando respecto a diversos derechos. Ha sido aplicada en numerosas oportunidades en relación con el derecho a la salud en el entendido de que

*... los derechos fundamentales por conexidad son aquellos que no siendo denominados como tales en el texto constitucional, sin embargo, les es comunicada esta calificación*

---

217. Sentencia T-036/93, M.P. José Gregorio Hernández Galindo. En la misma sentencia expresó la Corte: “Ha sostenido la jurisprudencia constitucional que la circunscripción de los derechos fundamentales a aquellos que se encuentran en la Carta Política bajo el título que lleva ese mismo nombre, excluyendo de tal condición cualquier otro derecho que se indique en un lugar distinto del texto, no es aceptable como único y determinante criterio, pues desvirtúa el sentido garantizador que a los mecanismos de protección y aplicación de los derechos humanos otorgó el Constituyente de 1991, específicamente cuando declaró en el artículo 93 que ‘la enunciación de los derechos y garantías contenidos en la Constitución y en los convenios internacionales vigentes, no debe entenderse como negación de otros que, siendo inherentes a la persona humana, no figuren expresamente en ellos’ ” (el resultado en cursivas es de la Corte).

218. De conformidad con el artículo 241, numeral 9, de la Constitución, corresponde a la Corte Constitucional revisar, en la forma que determine la ley, las decisiones judiciales relacionadas con la acción de tutela de los derechos constitucionales.

219. Aquí se sigue la sistematización que hace Óscar Parra (2003). *El derecho a la salud en la Constitución, la jurisprudencia y los instrumentos internacionales*, Defensoría del Pueblo, Bogotá, pp. 41 a 46.

*en virtud de la íntima e inescindible relación con otros derechos fundamentales, de forma que si no fueron protegidos en forma inmediata los primeros se ocasionaría la vulneración o amenaza de los segundos. Es el caso de la salud, que no siendo en principio derecho fundamental, adquiere esta categoría cuando la desatención del enfermo amenaza con poner en peligro su derecho a la vida* <sup>220</sup>.

El segundo supuesto ante el cual el derecho a la salud se entiende como derecho fundamental autónomo, se configura cuando se trata de la protección de aquellas personas que se encuentran en especiales condiciones de vulnerabilidad, que las convierte en sujetos de especial protección constitucional. En esta situación se encuentran en primer lugar los niños y niñas en tanto la Constitución expresamente otorga el carácter de fundamental a sus derechos, y entre ellos el derecho a la salud<sup>221</sup>. Al respecto la Corte ha sostenido que el derecho a la salud en el caso de los niños en cuanto derivado necesario de la vida y para garantizar la dignidad, es un derecho fundamental prevalente y por lo tanto de protección inmediata cuando se amenaza o vulnera su núcleo esencial<sup>222</sup>.

Igualmente se consideran sujetos de especial protección constitucional y respecto de ellos el derecho a la salud se considera un derecho fundamental, las personas en situación de discapacidad<sup>223</sup>, la madre y el que está por nacer<sup>224</sup>, las personas de la tercera edad<sup>22</sup>, las minorías étnicas<sup>226</sup>, los desplazados<sup>227</sup> y los reclusos<sup>228</sup>. De la misma manera la Corte ha afirmado que el derecho a la salud es fundamental respecto de sectores económicamente vulnerables de la población<sup>229</sup>.

El tercer supuesto representa el avance más importante en cuanto a la consolidación de la doctrina constitucional para la exigibilidad judicial de los derechos sociales, ya que permite que en ciertas circunstancias el derecho a la salud pueda ser considerado como derecho fundamental autónomo. Esto ocurre por la existencia de una legislación que ha desarrollado ampliamente su contenido, lo que convierte el derecho prestacional en un derecho subjetivo, del que se derivan las correlativas obligaciones estatales de garantía, respeto y protección. La Corte Constitucional lo ha definido de la siguiente manera:

220. Corte Constitucional, Sentencia T-71 de 1992, M.P. Jaime Sanín Greiffenstein. Además hay que aclarar que la co - nexidad se ha aceptado también con el derecho a la integridad y con la dignidad humana.

221. Artículo 44, Constitución Política: "Son derechos fundamentales de los niños: la vida, la integridad física, la salud y la seguridad social, la alimentación equilibrada, su nombre y nacionalidad, tener una familia y no ser separado de ella, el cuidado, el amor, la cultura, la recreación y la libre expresión de su opinión [...]" (subrayado fuera del original). Ver las sentencias T-031/94, T-174/94, T-290/94, T-339/9, T-07/96, T-093/97, T-762/98, SU-62/99, T-144/00, T-3/01, T-480/02, entre otras.

222. El núcleo esencial del derecho a la salud de los niños que es amparable mediante la acción de tutela exige: 1) la existencia de un atentado grave contra la salud de los menores. 2) que la situación que se reprocha no pueda evitarse o conjurarse por la persona afectada y, 3) que la ausencia de prestación del servicio ponga en alto riesgo la vida, las capacidades físicas o psíquicas del niño o su proceso de aprendizaje o socialización. Ver sentencia SU-22 de 1998, M.P. Eduardo Cifuentes Muñoz.

223. Ver entre otras sentencias T-823/99, T-179/00, T-920/00.

224. Ver sentencia T-171/99.

22. Ver entre otras sentencias T-484/97, T-1081/01, T-002/02, T-111/03.

226. Ver entre otras las sentencias T-428/98, C-088/01. Con respecto a las comunidades indígenas también es importante indicar que la jurisprudencia ha entendido que para que éstas puedan gozar plenamente de su derecho a la salud y los bienes y factores determinantes de la misma, es necesario velar por que la explotación de los recursos naturales en sus territorios sea compatible con la protección de su integridad social y cultural.

227. Ver entre otras las sentencias T-098/02, T-64/03, T-790/03 y T-138/0 .

228. Ver entre otras las sentencias T-13/98, T-3/98, T-233/01.

229. Ver sentencia T-209/99.

*“[P]uede sostenerse que tiene naturaleza de derecho fundamental, de manera autónoma, el derecho a recibir la atención de salud definida en el Plan Básico de Salud, el Plan Obligatorio de Salud y el Plan Obligatorio de Salud Subsidiado –Ley 100 de 1993 y sus normas complementarias–, así como respecto de los elementos derivados de las obligaciones básicas definidas en la Observación General No. 14. Lo anterior por cuanto se han definido los contenidos precisos del derecho, de manera que existe un derecho subjetivo claro a favor de quienes pertenecen a cada uno de los subsistemas –contributivo, subsidiado, etc. [...] La naturaleza de derecho fundamental que tiene el derecho a la salud en los términos del fundamento anterior, implica que tratándose de la negación de un servicio, medicamento o procedimiento establecido en el POS, se estaría frente a la violación de un derecho fundamental. No es necesario, en este escenario, que exista amenaza a la vida u otro derecho fundamental, para satisfacer el primer elemento de procedibilidad de tutela: violación o amenaza de un derecho fundamental”*<sup>230</sup>.

En la misma línea la Corte ha sostenido que

*... tratándose de la negación o demora de un servicio, medicamento o procedimiento incluido en el Plan Obligatorio de Salud, puede acudirse a la acción de tutela para lograr la efectiva protección del derecho fundamental a la salud”*<sup>231</sup>.

La presentación de acciones de tutela para exigir o reclamar la defensa del derecho a la salud se ha verificado desde la entrada en vigencia de la Constitución en 1991, y la Corte Constitucional en sus primeros fallos del año 1992 se pronunció sobre el alcance de los deberes estatales en la realización de los derechos sociales, y particularmente en relación con el derecho a la salud. Adicionalmente cabe mencionar que las tutelas por este derecho configuran una de las circunstancias excepcionales en las que la ley expresamente permite que se pueda hacer uso de este recurso contra los particulares que están encargados de la prestación de un servicio público<sup>232</sup>.

Después de la entrada en vigencia de la Ley 100 de 1993 que creó el Sistema General de Seguridad Social en Salud (SGSSS) y que prometía lograr la satisfacción del derecho a la salud de todos los colombianos, las tutelas continuaron presentándose con niveles de aumento constante, que se ha mantenido desde entonces y hasta los últimos años<sup>233</sup>. A ello se suman los casos en que se ha aceptado la procedencia excepcional de la acción de tutela en razón de la conexidad del derecho a la salud con el derecho a un ambiente sano, y por esta vía se han amparado situaciones relacionadas con la salud pública, como la disponibilidad de agua potable<sup>234</sup>, el saneamiento básico y la debida prestación

---

230. Sentencia T-89 de 2003, M.P. Eduardo Montealegre Lynett, reiterada entre otras en la sentencia T-299 de 2004, M.P. Eduardo Montealegre Lynett.

231. Sentencia T-08 de 2007 M.P. Clara Inés Vargas Hernández, reiterado en Sentencia T-261 de 2007, M.P. Marco Gerardo Monroy Cabra.

232. Además del artículo 86 de la Constitución, el Decreto 291 de 1991 que reglamentó la acción de tutela lo refiere expresamente en el artículo 42, numeral 2, al decir que la acción de tutela procederá contra acciones u omisiones de particulares “cuando aquel contra quien se hubiere hecho la solicitud esté encargado de la prestación del servicio público de salud”.

233. Hay que tener en cuenta que la tutela también se utiliza para proteger otros aspectos que no se refieren directamente al acceso a los servicios de salud pero sí están estrechamente relacionados con el derecho, como son los problemas de afiliación o multifiliación, la falta de aportes de seguridad social por parte de los patronos, la solicitud de reconocimiento del pago de las licencias de maternidad, y las incapacidades y el pago de acreencias salariales de trabajadores del sector.

234. Ver sentencias T-232 de 1999, T-379 de 1999 y T-413 de 1999.

de los servicios públicos domiciliarios de acueducto, alcantarillado y aseo<sup>23</sup>, entre otros. El siguiente cuadro ilustra el crecimiento de la participación de las tutelas en salud con respecto al total de esas acciones que se presentaron en todo el país.

### TUTELAS POR SALUD EN COLOMBIA, PERÍODO 1999-2005

| Año                      | 1999   | 2000    | 2001    | 2002    | 2003    | 2004    | 2005    |
|--------------------------|--------|---------|---------|---------|---------|---------|---------|
| Total tutelas            | 86.313 | 131.764 | 133.272 | 143.887 | 149.439 | 198.125 | 224.270 |
| Tutelas salud            | 21.301 | 24.843  | 34.319  | 42.734  | 51.944  | 72.033  | 81.017  |
| Porcentaje participación | 24,67% | 18,85%  | 25,75%  | 29,69%  | 34,7%   | 36,35%  | 36,12%  |

Fuente: Cuadro elaborado con los datos de los Informes de la Defensoría del Pueblo sobre la tutela y el derecho a la salud publicados en 2004 y 2007.

Como se observa, el crecimiento de la participación de las tutelas en salud en el total de estas acciones también ha venido en creciente aumento, destacándose que la cifra para el año 2000 representa el 189,% más que la del año 2002 y el 380,34% más que en 1999.

La gran cantidad de acciones de tutela por derecho a la salud ha hecho que éste sea un tema de gran importancia en los análisis y balances relacionados con el funcionamiento del Sistema de Salud creado por la Ley 100/93 y existen diversos estudios que han analizado el tema desde distintas perspectivas<sup>236</sup>. Algunas investigaciones se han concentrado en documentar los efectos de la proliferación de la tutela en salud para señalar los problemas que la frecuencia ascendente en el trámite de las mismas genera en la administración de justicia, así como los problemas derivados del “impacto de la tutela en las condiciones de distribución equitativa de los servicios”<sup>237</sup>. Las evaluaciones de la Defensoría del Pueblo contienen datos más específicos y ofrecen resultados sobre el tipo de entidad accionada, en los que se constata que la mayoría de los casos las demandadas son las entidades de aseguramiento del SGSSS, seguidas de los entes territoriales. Luego aparecen otras como las instituciones prestadoras de salud (IPS), el Inpec para el caso de la población reclusa, Acción Social para el caso de los desplazados, el Ministerio de Protección Social y otras, como las empresas de servicios públicos y las administradoras

23. Ver sentencias T-70 de 1992 y SU-442 de 1997.

236. Hay que destacar los informes sobre la tutela y el derecho a la salud elaborados por la Defensoría del Pueblo, el primero titulado “La tutela y el derecho a la salud: causas de las tutelas en salud” que analiza datos de 1999 hasta el primer semestre de 2003; y la actualización de dicho informe publicada en 2007 con el mismo título, pero que analiza el período comprendido entre 2003 y 200. Igualmente ver Francisco Azuero (2006). “La tutela y la provisión de la salud en Colombia. Una explicación institucional” en *Galeras de Administración* No. 9, noviembre. Universidad de los Andes, Facultad de Administración, Bogotá. Así mismo existen otros estudios que no sólo abordan el tema de la tutela en salud, sino que analizan también la tutela en pensiones y riesgos profesionales. Al respecto ver: Organización Iberoamericana de Seguridad Social – CES (200). “Trascendencia e impacto socioeconómico de la acción de tutela en el sistema de seguridad social colombiano, Informe final primera etapa. Estudio exploratorio”, Bogotá. Ver igualmente Mónica Arbeláez Rudas (2006). *Derecho a la salud en Colombia. El acceso a los servicios del sistema general de seguridad social en salud*. Bogotá, CINEP, Colciencias, capítulo 3.

237. Organización Iberoamericana de Seguridad Social – CES (200). “Trascendencia e impacto ... cit., p. 1.

de riesgos profesionales (ARP)<sup>238</sup>. En cuanto a las entidades territoriales, las más entuteladas son las secretarías departamentales, distritales o municipales de salud, seguidas de las alcaldías municipales<sup>239</sup>. Así mismo, en varios de los estudios realizados sobre el tema es posible identificar las causas específicas más frecuentes de reclamo vía tutela, la distribución territorial de las acciones, las entidades más demandadas y los procedimientos que mayormente son requeridos.

Igualmente, otros estudios han ofrecido cifras desde la perspectiva de la orientación de las decisiones, y se ha podido determinar cuáles son los juzgados que más tutelas sobre seguridad social y específicamente en salud conocen, en qué porcentajes los reclamos son concedidos en primera y segunda instancia y cuál es el porcentaje en que las sentencias que amparan el derecho a la salud son confirmadas en sede de revisión por la Corte Constitucional.

Por último, en cuanto a las materias que son objeto de trámite mediante la acción de tutela, éstas son muy diversas, pero en términos de la dimensión prestacional del derecho a la salud<sup>240</sup>, se aprecia que las acciones tienen que ver en primer lugar con el suministro de medicamentos o tratamientos<sup>241</sup> que, a pesar de estar en el POS y no estar limitados por las semanas mínimas de cotización, son negados por parte de las entidades promotoras de salud que prestan servicios tanto en el régimen contributivo como en el subsidiado. En segundo lugar, las tutelas se interponen por la negación de medicamentos o tratamientos que se encuentran excluidos del POS. Finalmente, otro grupo importante de tutelas lo conforman aquellas en las que se solicitan simultáneamente elementos del POS y otros excluidos del mismo<sup>242</sup>. Cada uno de estos eventos amerita un análisis separado.

### **5.1.1. Acciones de tutela para exigir medicamentos o tratamientos, que son negados a pesar de estar en el POS y de no estar en tiempos de carencias**

Inspirada en un modelo de pluralismo estructurado bajo la lógica del aseguramiento, la Ley 100 de 1993 parte de la definición de unos planes básicos obligatorios que contienen los beneficios a los cuales las personas tienen derecho. De acuerdo con la ley, el plan

*... permitirá la protección integral de las familias a la maternidad y enfermedad general, en las fases de promoción y fomento de la salud, y la prevención, diagnóstico,*

---

238. Ver Defensoría del Pueblo (2007). *La tutela y el derecho a la salud: Período 2003-2005*, pp. 44, 46 y 49.

239. *Ibid.*, p. 4

240. Acá nos concentraremos en la dimensión prestacional del derecho a la salud, a pesar de que ésta no es la única, pues el contenido del derecho a la salud es muy amplio y aspectos como los relacionados con la protección del cuerpo frente a injerencias ajenas, el consentimiento informado, la autonomía de los pacientes, el derecho a la información, el secreto médico, entre otros, también hacen parte del contenido del mismo, aunque corresponden a dimensiones distintas. Para un análisis acerca de la multidimensionalidad del derecho a la salud ver: Rodrigo Uprimny Yepes (2002). "El derecho a la salud en la jurisprudencia constitucional colombiana" en Saúl Franco (ed.) *La salud pública hoy. Enfoques y dilemas contemporáneos en salud pública*. Universidad Nacional de Colombia, Bogotá.

241. Al hablar de tratamientos deben entenderse todos los procedimientos, intervenciones, cirugías, exámenes, prótesis, etc.

242. La Defensoría del Pueblo señala que las tutelas por eventos incluidos en el POS representaron el 4,6% de las tutelas en el año 200; las tutelas en casos No POS el 29,7%, y los reclamos simultáneos el 13,3%.

*tratamiento y rehabilitación para todas las patologías, según la intensidad de uso y los niveles de atención y complejidad que se defnan* <sup>243</sup>.

El artículo 7 del Decreto 806 de 1998 define el Plan Obligatorio de Salud como:

*... el conjunto básico de servicios de atención en salud a que tiene derecho, en caso de necesitarlos, todo afiliado al Régimen Contributivo que cumpla con las obligaciones establecidas para el efecto y que están obligadas a garantizar a sus afiliados las Entidades Promotoras de Salud, EPS, y Entidades Adaptadas, EAS, debidamente autorizadas por la Superintendencia Nacional de Salud o por el Gobierno Nacional respectivamente, para funcionar en el Sistema General de Seguridad Social en Salud.*

[...]

*A través de este plan integral de servicios y con sujeción a lo establecido en el artículo 162 de la Ley 100 de 1993, se debe responder a todos los problemas de salud conforme al manual de intervenciones, actividades y procedimientos y el listado de medicamentos definidos por el Consejo Nacional de Seguridad Social en Salud.*

Los contenidos del Plan Obligatorio de Salud para los afiliados cotizantes (POS) eran definidos por el Consejo Nacional de Seguridad Social en Salud (CNSSS), función que a partir de 2007 fue trasladada a la Comisión de Regulación en Salud (CRS)<sup>244</sup>, conservando la aspiración de ir igualando progresivamente los contenidos del Plan Obligatorio de Salud para los afiliados del régimen subsidiado (POS-S) que son de menor cobertura, con los del Plan Obligatorio de Salud previsto para los afiliados del régimen contributivo<sup>24</sup>.

Los planes básicos se constituyen en la fuente de la cual emana el contenido preciso del derecho a la salud que es exigible incluso judicialmente y representan el derecho fundamental para los usuarios. Pese a lo anterior, hay un alto número de tutelas en las que se demanda a las entidades por la negación de procedimientos o medicamentos incluidos en los Planes Básicos y que no se encuentran limitados por las semanas mínimas de cotización.

Con respecto a los períodos mínimos de aporte, hay que aclarar que aunque la Ley 100/93 prohíbe expresamente las preexistencias<sup>246</sup>, sí establece que se requiere un míni-

243. Ley 100/93, artículo 162.

244. Dispone el artículo 7 de la Ley 1122 de 2007 que corresponde a la Comisión de Regulación en Salud: "1. Definir y modificar los Planes Obligatorios de Salud (POS) que las Entidades Promotoras de Salud (EPS) garantizarán a los afiliados según las normas de los regímenes Contributivo y Subsidiado".

24. La Ley 100/93 previó que "a partir del año 2000, todo colombiano deberá estar vinculado al Sistema a través de los regímenes contributivo o subsidiado, en donde progresivamente se unificarán los planes de salud para que todos los habitantes del territorio nacional reciban el Plan Obligatorio de Salud de que habla el artículo 162". (Artículo 17.B) En 2002, la Corte Constitucional llamó la atención del Gobierno Nacional porque pese al objetivo señalado por el cual "para esta época ya no debían existir vinculados al sistema, se observa que aún existe este grupo de personas cuando de hecho ha debido cumplirse la preceptiva legal desde hace dos (2) años, sin que hasta la fecha se haya dado estricto cumplimiento". Ver Sentencia C-130/02, M.P., Jaime Araújo Rentería. Hasta el momento la igualación en los planes de los dos regímenes no se ha alcanzado y por lo mismo la última reforma del SGSSS operada mediante la Ley 1122/07 estableció como función de la Comisión de Regulación en Salud la actualización anual del Plan Obligatorio de Salud "buscando el acercamiento progresivo de los contenidos de los planes de los dos regímenes con tendencia hacia el que se encuentra previsto para el régimen contributivo". (Artículo 14, lit.e).

246. Artículo 164, Ley 100/93.

mo de semanas cotizadas para el tratamiento de las enfermedades de alto costo. El tema fue reglamentado mediante el Decreto 806 de 1998 en el cual se dispuso:

*Artículo 61. Periodos mínimos de cotización. Los períodos mínimos de cotización al Sistema para tener derecho a la atención en salud en las enfermedades de alto costo son:* -

*Grupo 1. Un máximo de cien (100) semanas de cotización para el tratamiento de las enfermedades definidas como catastróficas o ruinosas de nivel IV en el Plan Obligatorio de Salud. Por lo menos 26 semanas deben haber sido pagadas en el último año.*

*Grupo 2. Un máximo de cincuenta y dos (52) semanas de cotización para enfermedades que requieran manejo quirúrgico de tipo electivo, y que se encuentren catalogadas en el Manual de Actividades, Intervenciones y Procedimientos –Mapipos– como del grupo ocho (8) o superiores. Por lo menos 26 semanas deben haber sido pagadas en el último año.*

*Parágrafo. Cuando el afiliado sujeto a períodos mínimos de cotización desee ser atendido antes de los plazos definidos en el artículo anterior, deberá pagar un porcentaje del valor total del tratamiento, correspondiente al porcentaje en semanas de cotización que le falten para completar los períodos mínimos contemplados en el presente artículo.* -

*Cuando el afiliado cotizante no tenga capacidad de pago para cancelar el porcentaje establecido anteriormente y acredite debidamente esta situación, deberá ser atendido, él o sus beneficiados, por las instituciones públicas prestadoras de servicios de salud o por aquellas privadas con las cuales el Estado tenga contrato. Estas instituciones cobrarán una cuota de recuperación de acuerdo con las normas vigentes.*

La Ley 1122 de 2007 también se refirió al tema y establece que:

*Artículo 14 literal h: No habrá períodos mínimos de cotización o períodos de carencia superiores a 26 semanas en el Régimen Contributivo. A los afiliados se les contabilizará el tiempo de afiliación en el Régimen Subsidiado o en cualquier EPS del Régimen Contributivo, para efectos de los cálculos de los períodos de carencia.* -

En los casos en que las personas han necesitado la prestación de servicios de salud y aún no han alcanzado el tiempo mínimo requerido, la tutela ha constituido el mecanismo para lograr la atención. La Corte Constitucional ha establecido que dicha acción es procedente para acceder al medicamento o tratamiento no suministrado por no alcanzar el mínimo de semanas cotizadas, cuando esta negativa amenace los derechos constitucionales fundamentales a la vida, a la integridad personal o la dignidad del interesado, así como cuando se configuran situaciones de urgencia. En tales eventos la entidad prestadora puede hacer el recobro ante el Ministerio de Protección Social - Fosyga, conforme a lo dispuesto en la Resolución 2933 de 2006. Sobre este punto ha dicho el alto tribunal:

*... Así las cosas, cuando el usuario del Plan Obligatorio de Salud del régimen contributivo requiera atención médica por una enfermedad cuyo tratamiento sea de alto costo, y no cumpla con el período mínimo de cotización, debe ser atendido por la entidad de* -

salud a la que esté afiliado, pero con la condición de que pague una suma determinada por los servicios prestados, que según la norma antes transcrita es “el porcentaje en semanas de cotización que le falten para completar los períodos mínimos contemplados” en ese mismo artículo. No se olvide que el usuario pertenece al régimen contributivo y, por tanto, se presume su capacidad de pago. Pero ¿qué ocurre cuando se presentan casos de urgencia? En estos eventos, la misma ley 100/93 en su artículo 168, obliga a todas las entidades de salud de carácter público o privado, a prestar los servicios médicos correspondientes a todas las personas, independientemente de su capacidad de pago. El costo de estos servicios está a cargo del Fondo de Solidaridad y Garantía o de la Entidad Promotora de Salud a la que esté afiliado el usuario, respectivamente.

*Entonces, bien puede afirmarse que antes situaciones de urgencia no es posible oponer períodos mínimos de cotización pues su exigencia violaría los derechos a la salud y a la vida de las personas que, padeciendo de una enfermedad que requiere tratamiento de “alto costo”, necesitan de atención médica y hospitalaria en forma inmediata. Los períodos de espera en esas situaciones constituyen un riesgo para la salud y ponen en peligro la vida de los usuarios* <sup>247</sup> (subrayado y negrillas en el original) .

La crítica que se formula a la jurisprudencia en este sentido tiene que ver con el incentivo perverso que de esta manera se puede generar en relación con que el individuo se mantiene por fuera del aseguramiento mientras esté sano, y cuando se enferma se afilia, a sabiendas de que obtendrá la atención requerida sin tener que pagar de su bolsillo en proporción al tiempo que le falte para cumplir los períodos mínimos; es decir, se estimula el que la persona se mantenga por fuera del sistema, lo que conlleva un ingreso no percibido en la subcuenta de compensación, que aún no ha sido cuantificado<sup>248</sup>.

Sin embargo, aunque importante, el tema de los períodos mínimos de cotización no es el que ocupa el mayor lugar en las acciones de tutela impetradas para exigir la prestación de servicios incluidos en el Plan Obligatorio de Salud. De acuerdo con la Defensoría del Pueblo, durante el período 2003-200, el 6,4% de las tutelas se interponía para reclamar servicios que se encontraban dentro del POS, y de éstas el 93,4% no se hallaba limitado por la causal “semanas mínimas de cotización”. La Defensoría concluye además que el mayor número de acciones de tutela registradas en el período 2003-2000 obedece a procedimientos, medicamentos y otros, que están en el POS y que no se encuentran afectados por períodos mínimos de cotización<sup>249</sup>.

Cuando se exige la prestación de un servicio incluido en el POS mediante el ejercicio de la tutela, en realidad no se trata de un conflicto acerca de la existencia del derecho, porque éste ya está garantizado por el plan obligatorio, sino de la búsqueda de un mecanismo para obligar a la entidad respectiva a suministrar el servicio al cual se encuentra obligada

247. Sentencia C-112 de 1998, M.P. Carlos Gaviria Díaz.

248. Este problema es analizado en el documento Ministerio de Salud (2001). *Evaluación del equilibrio financiero del SGSSS: Causas y propuestas de solución*, en: <http://www.saludcolombia.com/actual/salud62/colabora.htm>

249. Defensoría del Pueblo (2007). *La tutela y el derecho a la salud: período 2003-2005*, Bogotá, pp. 0 y 78.

como consecuencia del contrato de aseguramiento. De esta manera, la tutela opera más como un mecanismo para lograr el cumplimiento de obligaciones preexistentes, pues lo que se logra es compeler a la entidad responsable al pago de lo debido, razón por la cual en estos casos, en estricto sentido, no hay gran activismo del juez, pues lo que se está haciendo no es nada más que ordenar el cumplimiento de una obligación contractual preexistente, de modo que la tutela funciona más como un remedio contra la ineficiencia que como un instrumento para la ampliación del contenido del derecho a través de la intervención judicial<sup>20</sup>.

Esta situación es bastante preocupante, porque, como se mencionó, éstos son los casos que mayoritariamente están siendo tramitados a través de la acción de tutela, lo que evidencia un grave y reiterado desconocimiento del contenido de obligaciones claramente definidas, además de que en muchos casos el incumplimiento de parte de las entidades demandadas es deliberado. Aquí no se trata de un problema de falta de norma que regule el asunto, de indefinición, de los retardos en el pago de los aportes o de inconsistencias derivadas de la multifiliación, sino que se evidencia una inadecuada interpretación por parte de las entidades prestadoras de los servicios o las aseguradoras del alcance de los planes de beneficios. Esto ocurre por ejemplo en el caso de los exámenes paraclínicos que están contemplados en el POS pero se niegan aduciendo que el medio de contraste o el medicamento requerido para practicarlo no hace parte del mismo, o de las cirugías que se niegan por la no autorización de dispositivos. Lo anterior no se compadece con una interpretación integral y acorde con la garantía del derecho, pues es lógico que si se garantiza la realización de un examen o una cirugía, éstos deben practicarse e ir acompañados de todo lo que se requiera para su eficaz y adecuada realización<sup>21</sup>.

Otras perspectivas consideran que la causa del incumplimiento puede estar relacionada con la imposibilidad de asumir las obligaciones contractuales, por ejemplo debido a la falta de recursos. Sin embargo esto es muy cuestionable, porque los recursos en salud han crecido en los últimos años y además los prestadores están sujetos a unas condiciones de sostenibilidad y viabilidad financiera. Por eso los problemas que se planteen en relación con la financiación podrían estar en las falencias de los mecanismos de control sobre la capacidad financiera real de los prestadores, las demoras en los giros o la desviación de los recursos<sup>22</sup>, y no en la ausencia de los mismos.

---

20. Esta tesis es tomada del trabajo de Mauricio García Villegas y María Paula Saffon Sanín (2007). *"Is there hope in judicial activism on social rights? Assessing the dimension of judicial activism on social rights in Colombia"*. Bogotá, Mimeo, DeJuSticia. En el texto los autores distinguen los casos de activismo judicial de aquellos en que el juez simplemente se limita a ordenar que se cumpla con una obligación preexistente y al respecto afirman que en esos casos la tutela opera esencialmente como un remedio contra la ineficacia administrativa.

21. Esta circunstancia es señalada por el estudio de la Defensoría del Pueblo, en el que además se destaca que el 73,7% de los exámenes con solicitud de amparo hacía parte del POS, y de ellos únicamente el 2,8% se hallaba limitado por la causal de semanas mínimas de cotización.

22. Para una ilustración sobre la apropiación indebida y desviación de recursos de destinación específica que le corresponden al régimen subsidiado, ver la Resolución Defensorial No.006 de 2001 en la que se documentan prácticas irregulares como el empleo de recursos del régimen subsidiado como garantía de las entidades territoriales, incluida la pignoración de las partidas, y la aplicación de los recursos a depósitos financieros para obtener rendimientos.

### 5.1.2 Acciones de tutela para exigir medicamentos o tratamientos excluidos del POS

La definición de unos Planes Obligatorios de Salud obedece, en el diseño, a la necesidad de optimizar la utilización de recursos escasos ampliando la cobertura al mayor número de personas<sup>23</sup>. Sin embargo, como el modelo no pretende ni puede abarcar todas las contingencias a las cuales podría estar sometida una persona en materia de salud, lo que es además un imposible fáctico, es necesario que se defina una solución y un mecanismo de financiamiento para los eventos que no estén previstos o contemplados en dichos planes<sup>24</sup>. No obstante, ésta no debe ser la regla general sino la excepción, pues se supone que los planes básicos deben tratar de ser lo más completos posible y que por ello lo que queda por fuera serían eventos extraños o poco frecuentes<sup>2</sup>. En el caso colombiano, la Ley 100 de 1993, aunque se inserta en la lógica que obedece necesariamente a las anteriores consideraciones, por estar inspirada en un modelo de aseguramiento de riesgos o contingencias, no contempló expresamente desde el comienzo un mecanismo para resolver aquellas situaciones en las que se necesite costear procedimientos o medicamentos no previstos en los planes básicos para personas que carecieran de los recursos económicos para pagarlos<sup>26</sup>.

Cuando se presentaron los primeros eventos en que se requerían medicamentos o procedimientos no previstos en el POS<sup>27</sup>, la vía utilizada para acceder a ellos fue la acción de tutela. La jurisprudencia desarrollada por la Corte Constitucional en estos casos, determinó que el Estado tiene la obligación de garantizar el goce efectivo del derecho y la prestación de los servicios de salud y estableció expresamente que las personas tienen derecho a procedimientos o medicamentos no contemplados en el POS, en aquellos eventos en que la falta de la atención en salud afecte la vida digna del peticionario u otro derecho fundamental del mismo.

23. Esta intencionalidad fue contemplada expresamente en el artículo del Acuerdo del 8 de julio de 1994, mediante el cual el CNSSS aprobó el primer POS del régimen contributivo, en el que se dispuso “aprobar como criterio fundamental para inclusión de actividades, intervenciones o procedimientos dentro del Plan Obligatorio, la mayor efectividad en la utilización de los recursos, mayor eficacia en términos de los resultados deseados y a un costo que sea social y económicamente viable para el país y la economía”.

24. Cfr. Diana Pinto Masis y María Isabel Castellanos (2004). “Caracterización de los recobros por tutela y medicamentos no incluidos en los planes obligatorios de salud” en *Revista Gerencia y Políticas de Salud*. Vol. 3 No. 7, Pontificia Universidad Javeriana, Bogotá, p.42.

2. El cálculo de las contingencias cubiertas se hace en función de dos variables: el costo y la frecuencia de las mismas. En el Plan Obligatorio de Salud (POS) se incluyeron riesgos de alta frecuencia y de bajo costo, pero también algunos poco frecuentes y de alto costo, que en la primera definición que hizo el CNSSS quedaron clasificados como catastróficos o ruinosos dentro del Plan Obligatorio de Salud y para lo cual debería establecerse un mecanismo de reaseguro por parte de la EPS. Dichas enfermedades son las siguientes: a) Tratamientos con quimioterapia o radioterapia para cáncer. b) Transplantes de órganos y tratamiento con diálisis para la insuficiencia renal crónica. c) Tratamiento para el sida y sus complicaciones. d) Tratamiento médico quirúrgico para el paciente con trauma mayor. e) Tratamiento para el paciente internado en una unidad de cuidados intensivos. f) Tratamiento quirúrgico para enfermedades del corazón y del sistema nervioso central. g) Tratamiento quirúrgico para enfermedades de origen genético o congénito. h) Reemplazos articulares. Actualmente el tema de las enfermedades ruinosas o catastróficas en especial el VIH-sida está regulado por la Ley 972 de 200.

26. Al respecto hay quienes sostienen que además de que no se previó expresamente la fórmula para suministrar los servicios que estuvieran por fuera de los planes básicos, tampoco se indicó expresamente que era imposible suministrar servicios por fuera de lo establecido en estos planes. Ver Aquiles Arrieta (2002). “Comentarios a la creación de jurisprudencia constitucional: el caso del acceso a los servicios de salud” en *Revista Tutela, Acciones Populares y de Cumplimiento*, Bogotá, Legis, 2002, pp. 1773 a 1777.

27. Se habla indistintamente de POS y POSS porque para estos efectos la situación fue la misma.

Posteriormente se fueron expidiendo algunas normas que buscaron aclarar este asunto. La primera de estas reglamentaciones fue el Acuerdo 8 del 6 de julio de 1994 del Consejo Nacional de Seguridad Social en Salud (CNSSS), mediante el cual se adoptó por primera vez el Plan Obligatorio de Salud para el régimen contributivo<sup>28</sup>. Allí se contemplaron una serie de exclusiones y limitaciones para los elementos “que no contribuyan al diagnóstico, tratamiento y rehabilitación de la enfermedad; aquellos que sean considerados como cosméticos, estéticos, suntuarios, y aquellos que expresamente defina el Consejo en el futuro”<sup>29</sup>, a lo que suma una lista de eventos expresamente excluidos<sup>260</sup>.

Luego se expidió la Resolución 261 del 10 de agosto de 1994 del Ministerio de Salud, mediante la cual se estableció el “Manual de Actividades, Intervenciones y Procedimientos del Plan Obligatorio de Salud en el Sistema General de Seguridad Social en Salud”. El artículo 13 de dicha norma estableció que

*... la receta deberá ceñirse a los medicamentos autorizados en el manual de medicamentos y terapéutica, sin que por ningún motivo se admitan excepciones, salvo que el usuario los pague como parte del plan complementario [...] No se reconocerán recetas que contengan artículos suntuarios, cosméticos, complementos vitamínicos, líquidos para lentes de contacto, tratamientos capilares ...*

Más adelante, el artículo 18 reitera lo relacionado con las exclusiones y limitaciones del Plan Obligatorio de Salud dispuesto en el Acuerdo 08 de 1994<sup>261</sup>.

Esta resolución y las demás disposiciones posteriores que excluyeron la posibilidad de formular medicamentos por fuera de lo establecido en el Manual de Actividades, Intervenciones y Procedimientos, o de realizar procedimientos distintos a los previstos en el POS, han sido inaplicadas por la Corte por considerarlas contrarias a los postulados

---

28. El Plan Obligatorio de Salud vigente hoy para el régimen subsidiado fue aprobado mediante el Acuerdo 306 de 200.

29. Artículo 7, Ac 8/94 CNSSS.

260. Los eventos excluidos conforme al artículo 7 del Acuerdo 8/94 fueron: a) Cirugía estética o con fines de embellecimiento. b) Tratamientos nutricionales con fines estéticos. c) Tratamiento para la infertilidad. d) Tratamientos no reconocidos por las asociaciones médico-científicas a nivel mundial o aquellos de carácter experimental. e) Tratamientos o curas de reposo o del sueño. f) Medias elásticas de soporte, corsets, fajas, sillas de ruedas, plantillas, zapatos ortopédicos, lentes y lentes de contacto. g) Medicamentos y sustancias que no se encuentren expresamente autorizados en el Manual de Medicamentos y Terapéutica. h) Tratamientos con drogas o sustancias experimentales para cualquier tipo de enfermedad. i) Trasplante de órganos. No se excluyen aquellos de reconocida eficacia, como son el trasplante renal, de médula ósea, de corazón y de córnea, con estricta sujeción a las condiciones de elegibilidad y demás requisitos establecidos en las respectivas Guías de Atención Integral. j) Tratamiento con psicoterapia individual, psicoanálisis o psicoterapia prolongada. No se excluye la psicoterapia individual de apoyo en la fase crítica de la enfermedad y sólo durante la fase inicial. Tampoco se excluyen las terapias grupales. Se entiende por psicoterapia prolongada aquella que sobrepasa los treinta (30) días de tratamiento una vez hecho el diagnóstico. k) Tratamientos de periodoncia, ortodoncia y prótesis en la atención odontológica. l) Tratamiento de várices con fines estéticos. m) Actividades, procedimientos e intervenciones de tipo curativo para las enfermedades crónicas, degenerativas, carcinomatosas, traumáticas o de cualquier índole en su fase terminal, o cuando para ellas no existan posibilidades de recuperación. Podrá brindarse soporte psicológico, terapia paliativa para el dolor, la disfuncionalidad y la incomodidad o terapia de mantenimiento. Todas las actividades, intervenciones y procedimientos deben estar contemplados en las respectivas Guías de Atención Integral. n) Actividades, procedimientos e intervenciones de carácter educativo, instruccional o de capacitación que se lleven a cabo durante el proceso de rehabilitación, distintos a aquellos necesarios estrictamente para el manejo médico de las enfermedades y sus secuelas. ñ) Actividades, intervenciones y procedimientos, no autorizados expresamente en el respectivo manual.

261. La actual lista de medicamentos es la aprobada en el Acuerdo 228 de 2002, expedido por el CNSSS y modificado por los Acuerdos 326 de 2002 y 282 de 2004.

constitucionales, ya que tales limitaciones y exclusiones pueden afectar gravemente la garantía plena del derecho<sup>262</sup> y “por resultar en estas situaciones particulares, necesarios para preservar la vida, o la salud del paciente”.<sup>263</sup> Esta posición ha sido sostenida y reiterada de manera continua y permanente por la jurisprudencia, que ha fijado la regla según la cual las personas sí tienen derecho al cubrimiento de eventos que estén por fuera del POS, siempre y cuando se esté ante las siguientes circunstancias: 1) Que la falta del medicamento o tratamiento excluido por la reglamentación legal o administrativa amenaza derechos constitucionales fundamentales (vida, integridad, dignidad entre otros). 2) Debe tratarse de un medicamento o tratamiento que no pueda ser sustituido por otro de los contemplados en el plan obligatorio o que pudiendo sustituirse, el sustituto no tenga el mismo nivel de efectividad que el excluido del plan, siempre y cuando ese nivel de efectividad sea necesario para proteger el mínimo vital del paciente. 3) Que el paciente no pueda pagar los costos del medicamento o tratamiento requerido ni pueda acceder a él por otro sistema o plan de salud (p. ej.: planes de empresas, planes complementarios o prepagados). 4) Que el medicamento o tratamiento haya sido prescrito por un médico adscrito a la Empresa Promotora de Salud a la que pertenece el solicitante<sup>264</sup>.

Ante estos supuestos se ha aceptado que la tutela sea el mecanismo para acceder a los servicios no contenidos en el plan obligatorio del régimen contributivo y de manera similar se ha aplicado para el régimen subsidiado, aunque en este último caso se tiene además una previsión normativa expresa que impone al Estado la obligación de asumir el costo de los servicios no cubiertos por el plan obligatorio<sup>265</sup>. En ocasiones la Corte también ha protegido por esta vía a los llamados participantes vinculados<sup>266</sup>. La forma de financiar estos servicios es el recobro por parte de las empresas aseguradoras al Fondo de Solidaridad y Garantía (Fosyga).

262. Un argumento jurídico adicional para cuestionar las restricciones que estas normas imponen al ejercicio del derecho a la salud sostiene que tales disposiciones tienen problemas de constitucionalidad, por estar contenidas en actos administrativos, con lo cual resultarían violatorias de la reserva legal que tiene cualquier disposición que imponga límites a los derechos constitucionales. Al respecto ver Aquiles Arrieta. Ob. cit., pp. 1773 a 1777. Sobre esto cabe comentar que si bien existe la reserva de ley para el desarrollo de los derechos amparados en la Constitución, en el caso de los derechos sociales y para aspectos relacionados con la operatividad de los sistemas creados para su garantía, parece difícil pensar que la definición de los contenidos del derecho y las limitaciones a su ejercicio deban ser encargadas en todos los casos al poder legislativo, ya que la dinámica propia de estos organismos puede dificultar el proceso. El modelo colombiano entrega esta labor de definición a un organismo plural que se concibe como independiente, como es el Consejo Nacional de Seguridad Social en Salud. La creación de este organismo regulador aproxima el modelo de salud a la experiencia de regulación en otros sectores, como telecomunicaciones y energía. No obstante, en la perspectiva que defiende la estricta reserva legal en todos los asuntos relacionados con la definición de los contenidos de los derechos, incluso los prestacionales, la competencia para la definición de los planes obligatorios de salud que materializan el contenido del derecho debería ser en todo caso del órgano legislativo y no de un ente regulador asociado a la rama ejecutiva. Éste sin embargo es un debate que amerita un análisis en mayor profundidad, que desborda los objetivos de este trabajo.

263. T-482/0, M.P. Rodrigo Escobar Gil.

264. Sentencias SU-480 de 1997, T-283 de 1998, T-328 de 1998 y T-329 de 1998, T-93 de 2001 entre otras.

265. El artículo 31 del decreto 806 de 1998 dispone que: “cuando el afiliado al régimen subsidiado requiera de servicios adicionales a los incluidos en el POS y no tenga capacidad de pago para asumir el costo de dichos servicios, podrá acudir a las instituciones públicas y a aquellas privadas que tengan contrato con el Estado, las cuales estarán en la obligación de atenderlo de conformidad con su capacidad de oferta. Estas instituciones están facultadas para cobrar una cuota de recuperación con sujeción a las normas vigentes”. Adicionalmente, la jurisprudencia constitucional también ha dejado establecido que las entidades promotoras deben informar a los usuarios del régimen subsidiado la anterior previsión y además “deben sugerir al afiliado que se dirija a las autoridades municipales o distritales de salud con el fin de que éstas le informen qué instituciones públicas o privadas que hayan suscrito contrato con el Estado se encuentran en capacidad de dispensarle el servicio de salud que requiere”. Ver sentencia T-49 de 1999, M.P. Carlos Gaviria Díaz.

266. Ver sentencia T-274 de 2002, M.P. Rodrigo Escobar Gil.

Para continuar con el análisis del alcance de las exclusiones del POS, es pertinente considerar que la regulación legal tiene algunas disposiciones distintas, dependiendo si se trata de medicamentos excluidos o de tratamientos, razón por la cual se abordará separadamente cada una de estas circunstancias.

En relación con los medicamentos, las pretensiones de exclusión definitiva de los que estuvieran por fuera del POS fue dejada atrás y la doctrina establecida por la Corte Constitucional fue incorporada con el paso del tiempo en las normas. Fue así como el Acuerdo 83 de 1997 del CNSSS dispuso que para garantizar el derecho a la vida y a la salud de las personas podrían formularse medicamentos no incluidos en el Manual de Medicamentos y Terapéutica<sup>267</sup>. Posteriormente, mediante la Resolución 061 de 1997 del Ministerio de Salud, se ordenó la creación de los Comités Técnicos Científicos a los cuales se les encomendó la función de “atender las reclamaciones que presenten los afiliados y beneficiarios de las EPS en relación con la ocurrencia de hechos de naturaleza asistencial que presuntamente afecten al usuario respecto de la adecuada prestación de los servicios de salud”. La Resolución 061 de 1997 fue adicionada por la Resolución 2312 de 1998 que modificó el artículo 1 y estableció el procedimiento para el recobro. Posteriormente, estas resoluciones fueron derogadas por la Resolución 2948 de 2003, que dispuso la conformación obligatoria de Comités Técnicos Científicos en las Entidades Promotoras de Salud tanto del régimen contributivo como del subsidiado<sup>268</sup>, las Cajas de Compensación Familiar que administren directamente los recursos del artículo 217 de la Ley 100 de 1993 y demás entidades obligadas a compensar<sup>269</sup>. En 2006, el Ministerio de la Protección Social expidió la Resolución 2933 que reguló nuevamente la conformación de los Comités y los recobros ante el Fosyga. De acuerdo con la última resolución mencionada, los Comités Técnicos Científicos deben quedar integrados por un representante de la EPS del régimen contributivo o subsidiado, o la entidad obligada a compensar según corresponda, un representante de las Instituciones Prestadoras de Salud (IPS) y un representante de los usuarios<sup>270</sup>.

La misma norma les atribuyó a esos Comités la función de analizar para su autorización las solicitudes presentadas por los médicos tratantes para el suministro a los afiliados de medicamentos por fuera de la lista del POS, labor que deben llevar a cabo justificando técnicamente las decisiones adoptadas. Así mismo, a estos Comités corresponde realizar evaluaciones trimestrales de los casos autorizados y el seguimiento sobre el resultado de

---

267. Artículo 8, Acuerdo 83/97, modificado por el Acuerdo 110/98 del CNSSS. El acuerdo dispone además que si el precio máximo al público de los medicamentos no incluidos en el manual, teniendo en cuenta el valor total del tratamiento, es menor o igual al precio máximo al público de los medicamentos que reemplazan o su similar, deberán suministrarse con cargo a la E.P.S. o a la A.R.S., y si el precio máximo excede o es superior, la diferencia será cubierta con recursos del Fosyga. Si la formulación de estos medicamentos se asocia con aquellas patologías clasificadas como de alto costo, el costo de dichos medicamentos hará parte del recobro al reaseguro.

268. Es pertinente recordar que la Ley 112 de 2007 unificó la forma de nombrar las Entidades Promotoras de Salud para el régimen contributivo y el subsidiado, con lo cual desapareció la nominación de Administradoras del Régimen Subsidiado (ARS), que “se denominarán en adelante Entidades Promotoras de Salud del Régimen Subsidiado (EPS)” (Ley 112/07, art. 14, inc. 2).

269. La compensación en la subcuenta del Fosyga se realiza cuando el valor pagado en UPC por la prestación de servicios de salud es mayor que el monto de la cotización, pues en ese caso el Fondo Público paga la diferencia a las EPS.

270. Artículo 1, Resolución 2933 del 1 de agosto de 2006.

la salud de los pacientes a quienes se les autorizaron dichos tratamientos, y presentar al Ministerio de la Protección Social y a las autoridades competentes, cuando éstas los soliciten, los informes relacionados con su objeto y funciones<sup>271</sup>.

La norma también dispone que los Comités se reúnan como mínimo una vez a la semana, que deben elaborar actas de las reuniones, las cuales además deben estar siempre a disposición del Ministerio de Protección Social y la Superintendencia Nacional de Salud, y se fijaron unos criterios para evaluar las solicitudes, criterios que, aunque cercanos, son un poco más restrictivos que los planteados por la Corte Constitucional. Dichos criterios son los siguientes<sup>272</sup>:

- a) La prescripción de medicamentos no incluidos en el Manual del POS sólo puede realizarla el personal autorizado de la respectiva entidad.
- b) Sólo pueden autorizarse medicamentos que se encuentren debidamente autorizados para su comercialización y expendio en el país y coincidir con las indicaciones aprobadas por el Invima para el producto.
- c) Antes de la prescripción de dichos medicamentos, deben haberse utilizado y agotado las posibilidades terapéuticas consagradas en el Manual pero sin obtener una respuesta clínica y/o paraclínica satisfactoria dentro del término previsto en sus indicaciones, o que el paciente haya mostrado reacciones adversas e intoleradas al medicamento o éste tenga contraindicaciones expresas sin alternativas en la lista, todo lo cual deberá constar en la historia clínica.
- d) Debe existir un riesgo inminente para la vida y salud del paciente, lo cual debe ser demostrable y constar en la historia clínica respectiva.

Adicionalmente el parágrafo del artículo 6 de la Resolución 2933 de 2006 establece:

*... en ningún caso el Comité Técnico Científico podrá aprobar tratamientos experimentales ni aquellos medicamentos que se prescriban para la atención de los tratamientos que se encuentren expresamente excluidos del Plan de Beneficios conforme con el artículo 18 de la Resolución 5261 de 1994 y demás normas que la adicionen, modifiquen o deroguen.*

De acuerdo con el artículo 7 ibídem, la solicitud del medicamento deberá ser presentada por el médico tratante al Comité Técnico Científico, el cual deberá establecer su pertinencia y podrá solicitar para el efecto que el médico allegue documentación adicional debidamente sustentada. Excepcionalmente, en situaciones de urgencia manifiesta, el médico tratante puede tomar directamente la decisión sobre el medicamento por utilizar, previa verificación del cumplimiento de los criterios esbozados, pero posteriormente debe presentar el caso al Comité y es éste quien confirmará o no la decisión adoptada o la continuidad en el suministro del medicamento<sup>273</sup>.

---

271. Artículo 4, Resolución 2933 del 1 de agosto de 2006.

272. Vale la pena mencionar que los criterios que establece la Resolución 2933 de 2006 son los mismos que se habían contemplado en las resoluciones 061 de 1997 y 2948 de 2003 con excepción del criterio según el cual los medicamentos para atender enfermedades de alto costo en tratamientos hospitalarios o ambulatorios deben ser asumidos por la entidad de aseguramiento con cargo al reaseguro de las mismas, que fue eliminado en la última norma.

273. Artículo 8, Resolución 2933 del 1 de agosto de 2006.

De acuerdo con lo anterior, la legislación vigente previó la existencia de un mecanismo para dar curso a las peticiones de medicamentos no incluidos en el POS, de acuerdo con el cual éstas deberían ser tramitadas por los Comités Técnicos Científicos y no a través de la acción de tutela. Pese a ello, lo que se ha constatado es que la tutela sigue siendo el mecanismo preferido para dar curso a estas reclamaciones, por encima del procedimiento reglamentario, por lo que cabe preguntarse cuáles son las razones que explican esta situación. El profesor Aquiles Arrieta señala en primer lugar, como un factor que contribuye a ello, la falta de información por parte de los usuarios, que desconocen la existencia de los Comités Técnicos Científicos y el procedimiento por seguir, lo que favorece la inoperancia del mecanismo pues en ocasiones las EPS no informan al usuario para que no reclame o para que interponga la tutela “ya que algunas entidades consideran que los recobros son mas fáciles con tutela en mano que con decisión del comité científico”<sup>274</sup>.

De acuerdo con el mismo autor, una segunda explicación tiene que ver con la expectativa de la persona en relación con el éxito de su reclamación, pues ante el primer rechazo no se quiere recibir una segunda decisión adversa proveniente del Comité Técnico Científico y prefieren ir de una vez a la tutela. A esto se puede agregar que la tutela puede resolverse en un lapso menor de tiempo, porque tiene un término muy corto y perentorio para su resolución, mientras que el número de requerimientos que deben resolver los Comités puede ser muy elevado y demorar la solución de los casos, a pesar de que sus reuniones son periódicas, con frecuencia semanal. Igualmente Arrieta señala que se prefiere acudir a la tutela porque allí se tiene mayor seguridad acerca de la regla aplicable al caso, por la información disponible acerca de los precedentes jurisprudenciales, que contrasta con la mayor incertidumbre respecto a la decisión que puede ser adoptada por el Comité.

De otro lado, la ausencia de un criterio para definir qué concepto prevalece en los casos en que el médico tratante solicita un medicamento y el Comité lo niega, ha llevado a que este tipo de situaciones también sean resueltas a través de la tutela<sup>27</sup>.

Finalmente, otra de las razones, aunque no directamente relacionada con el funcionamiento de los Comités Técnicos Científicos, es que el constante recurso a la tutela en relación con el acceso a medicamentos No Pos también puede leerse como un indicador que refleja la existencia de un amplio número de necesidades insatisfechas de los usuarios “como resultado de la desactualización de los contenidos de los planes de beneficios en relación con los avances tecnológicos, o los cambios de perfiles epidemiológicos de la población”<sup>276</sup>. Algunos de los medicamentos más novedosos son incluso menos costosos, pero la falta de buena dirección en el sector salud y de estudios epidemiológicos serios y completos impide el acceso a estas opciones<sup>277</sup>.

---

274. Aquiles Arrieta. Ob. cit., p. 1771.

27. En la sentencia T-344 de 2002, M.P. Manuel José Cepeda, la Corte abordó este asunto y tras establecer que no existía disposición alguna que indicara qué procedimiento debía seguirse para dirimir el conflicto entre el médico tratante y el Comité Técnico Científico, cuando el primero solicita autorización para utilizar medicamentos no incluidos en el POS luego de haber probado varios con respuesta inocua en la salud del paciente, y el segundo la niega por no estar incluidos y existir otros incluidos que no han sido probados y que son recomendados por el Comité, definió que mientras no se establezca un procedimiento expedito para resolver con base en criterios claros tales conflictos “la decisión de un médico tratante de ordenar una droga excluida del POS, por considerarla necesaria para salvaguardar los derechos de un paciente, prevalece y debe ser respetada, salvo que el comité técnico científico, basado en (i) conceptos médicos de especialistas en el campo en cuestión, y (ii) en un conocimiento completo y suficiente del caso específico bajo discusión, considere lo contrario”.

276. Ver Pinto y Castellanos, Ob. cit., p. 43

277. En esta línea cabe señalar que una de las recomendaciones hechas por la Defensoría del Pueblo en el primer estudio publicado sobre la acción de tutela (período 1999-primer semestre de 2003) fue precisamente “proceder a la revisión, re-

Cuando la autorización del medicamento no incluido en el plan de beneficios se obtiene por decisión del Comité Técnico Científico, hay lugar al recobro contra el Fosyga, de acuerdo con el procedimiento establecido en la Resolución 2933 de 2006, que indica los documentos y soportes que se deben anexar y según la cual el monto que se reconoce “será la diferencia entre el valor facturado del medicamento suministrado y el valor calculado para el o los medicamentos incluidos en el Plan Obligatorio de Salud del mismo grupo terapéutico que se reemplaza(n) o sustituye(n)”<sup>278</sup>, del cual se descuenta el valor de la cuota moderadora o copago que se haya cobrado al afiliado. Cuando la autorización del medicamento no incluido proviene de un fallo de tutela y éste es para actividades, procedimientos e intervenciones incluidas en los planes obligatorios, el monto que se reconoce es el mismo<sup>279</sup>. Si el medicamento No Pos ordenado por un fallo de tutela es para actividades, procedimientos e intervenciones excluidas de los planes obligatorios de salud, el valor que se reconoce y se paga es el 0% del valor facturado del medicamento<sup>280</sup>.

Como se mencionó, en el caso del acceso a los medicamentos no incluidos en los planes obligatorios, hay un procedimiento administrativo establecido en el que el rol principal lo desempeñan los Comités Técnicos Científicos, aunque también se acude a la acción de tutela. La situación es un poco distinta en relación con los tratamientos, procedimientos o intervenciones excluidas, pues para estas situaciones no existe un procedimiento administrativo ni una regulación específica sobre el tema<sup>281</sup>, y por ello la única vía posible de satisfacción del derecho es la acción de tutela<sup>282</sup>.

---

ajuste y adecuación del contenido del Plan Obligatorio de Salud, de tal forma que las actividades, procedimientos y patologías en él incluidas, estén tan clara y precisamente delimitados que no den mayor campo a la interpretación por parte de quienes deben proceder a su autorización. Esta labor debe tener en cuenta el actual perfil demográfico y epidemiológico del país y aparejar el examen y actualización financiera de la Unidad de pago por capitación o prima de aseguramiento”. Una consideración similar se hace en el estudio financiado por el Programa de Apoyo a la Reforma en Salud (PARS) del Ministerio de Protección Social, en el que se propone “avanzar en el desarrollo de un sistema de evaluación de tecnología en salud, que permita contar con mayor información y criterios más claros hacia la toma de decisiones sobre ingreso y adopción de tecnologías en el país, inclusión de medicamentos y procedimientos en los planes de beneficios, y en general, para promover un uso más racional de la tecnología médica”. Ver Pinto y Castellanos. Ob. cit., p. 8.

278. Artículo 2 lit a), Resolución 2933 del 1 de agosto de 2006.

279. Artículo 2 lit c) inciso uno, Resolución 2933 del 1 de agosto de 2006.

280. Artículo 2 lit c) inciso cuarto, Resolución 2933 del 1 de agosto de 2006.

281. Un intento de reglamentación al respecto se hizo cuando se expidió el Plan Nacional de Desarrollo para los años 1999-2002 mediante la Ley 08 de 1999, que en su artículo 37 se refirió expresamente a la prestación de servicios de salud por fuera de lo definido en el POS en situaciones excepcionales. La mencionada ley fue declarada inexecutable por vicios en el trámite de su formación mediante la sentencia C-7 de 2000, M.P. Carlos Gaviria Díaz, por lo cual el tema quedó sin regulación legal. Decía el mencionado artículo: “En situaciones excepcionales, cuando esté de por medio el derecho a la vida, se autorizará mediante trámite especial que definirá el Consejo Nacional de Seguridad Social, conforme su competencia, la prestación de servicio de salud por fuera del POS definido por ese organismo y obligatorio para todas las entidades promotoras de salud, cualquiera que sea su naturaleza, en Colombia o excepcionalmente en el exterior, por limitaciones de la tecnología nacional, siempre que la atención en el país no sea posible, no se trate de tratamientos experimentales, que en ningún caso serán procedentes, y se ajusten a las situaciones y procedimientos que para el efecto reglamente el Consejo Nacional de Seguridad Social en Salud. Para este efecto las prestaciones en el exterior se deberán otorgar por entidades acreditadas y debidamente adscritas al Sistema de Seguridad Social del país correspondiente. El Ministerio de Salud o, en su caso, la EPS conforme lo defina el Consejo Nacional de Seguridad Social, tendrán la responsabilidad de escoger la entidad en el exterior que se debe hacer cargo del procedimiento. PARAGRAFO. El afiliado que requiera o adelante trámite para tratamientos, procedimientos o medicamentos por fuera del POS deberá demostrar que ha cumplido en forma plena y oportuna con sus obligaciones, conforme se dispone en las normas legales y reglamentarias. Es deber de las autoridades judiciales y administrativas velar por que esta disposición se cumpla como requisito para el ejercicio de los derechos, disponiendo las medidas que garanticen por parte del usuario el pago de las sumas que le corresponda cancelar”. Esto mismo también lo decía originalmente el Decreto 266 de 2000: “En situaciones excepcionales, cuando esté de por medio el derecho a la vida, se autorizará mediante trámite especial, que definirá el Consejo Nacional de Seguridad Social, conforme su competencia, la prestación del servicio de salud por fuera del POS definido por ese organismo y obligatorio para todas las entidades promotoras de salud, cualquiera que sea su naturaleza, en Colombia o excepcionalmente en el exterior, por limitaciones de la tecnología nacional, siempre que la atención en el país no sea posible, no se trate de tratamientos experimentales, que en ningún caso serán procedentes, y se ajusten a las situaciones y procedimientos que para el efecto reglamente el Consejo Nacional de Seguridad Social en Salud”.

282. Lo mismo ocurre si la tutela es utilizada para obligar a las entidades demandadas a prestar servicios de salud que,

Cuando se autoriza un procedimiento, intervención o tratamiento no incluido en el POS en sede de tutela, las EPS del régimen contributivo o subsidiado o la entidad obligada a compensar que lo suministra, también queda habilitada para hacer el recobro del gasto, haciendo la solicitud ante el Ministerio de Protección Social y aportando los documentos que soporten la erogación. La Resolución 2933 de 2006 también reglamentó el procedimiento que se sigue en estos casos y el valor que se paga se liquida sobre el valor total facturado por el proveedor<sup>283</sup>. Así los mecanismos para acceder a eventos excluidos del Plan Obligatorio y la forma de financiarlos se pueden sintetizar en el siguiente esquema:

#### MECANISMOS Y FINANCIACIÓN DE EVENTOS NO-POS

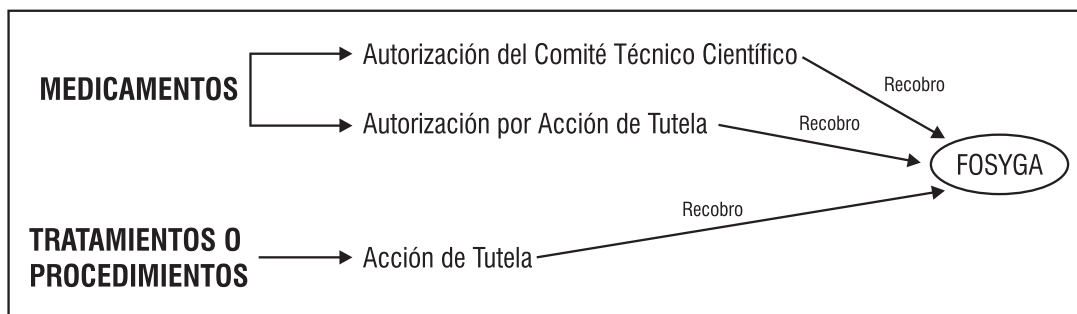

Sin embargo, aunque la figura del recobro es la alternativa para financiar con cargo al Estado el costo de los medicamentos y procedimientos que la población demanda por fuera de lo establecido en los contratos con las aseguradoras, éste genera incentivos perversos para la obtención de rentas por parte de las EPS. Estos efectos se tratan de contrarrestar con la entrada en vigor de la Ley 1122/07, que en su artículo 14 incorporó una previsión especial relacionada con el trámite que se sigue frente a las solicitudes de medicamentos no incluidos en el plan de beneficios en el caso de las enfermedades de alto costo. Allí se impone a las EPS la obligación de estudiar oportunamente las solicitudes y tramitarlas ante el Comité, so pena de que si después se obliga mediante acción de tutela al suministro del medicamento, ya no pueden hacer el recobro por la totalidad sino que deberán ser cubiertos por partes iguales entre las EPS y el Fosyga. Claramente esto pretende comprometer en mayor medida la responsabilidad de las EPS y desincentivar el recurso a la tutela, por lo menos disminuyendo el monto del estímulo económico<sup>284</sup>.

aunque incluidos en el Plan Obligatorio, están sujetos a períodos mínimos de cotización, o cuando se exigen pagos compartidos que los usuarios no pueden asumir.

283. Artículo 26 lit b), Resolución 2933 de 1 de agosto de 2006.

284. El artículo 14 de la Ley 1122/07 preceptúa: "... A partir de la vigencia de la presente ley, el Sistema tendrá las siguientes reglas adicionales para su operación: [...] "j) En aquellos casos de enfermedad de alto costo en los que se soliciten medicamentos no incluidos en el plan de beneficios del régimen contributivo, las EPS llevarán a consideración del Comité Técnico Científico dichos requerimientos. Si la EPS no estudia oportunamente tales solicitudes ni las tramita ante el respectivo Comité y se obliga a la prestación de los mismos mediante acción de tutela, los costos serán cubiertos por partes iguales entre las EPS y el Fosyga. El Ministerio de la Protección Social reglamentará el presente artículo, dentro de los seis (6) meses posteriores a la entrada en vigencia de la presente ley. En todo caso, cuando el Fosyga haga el reconocimiento, el pago se hará sobre la base de las tarifas mínimas definidas por la Comisión de Regulación en Salud".

### 5.1.3. *Acciones de tutela que simultáneamente exigen medicamento y procedimientos que se encuentran dentro del POS y eventos NO POS*

El recurso a la acción de tutela parte de la necesidad de una atención o servicio determinado; por eso puede ser utilizada para exigir simultáneamente eventos garantizados por el POS y eventos excluidos. A veces se trata de proveedores por fuera de la red propia o adscrita al asegurador, que incluyen las remisiones al exterior. Para estos casos son válidas todas las consideraciones previas, aunque un problema adicional tiene que ver con que los jueces constitucionales, en el momento de fallar, no hacen la distinción entre el evento que hace parte del Plan y el que no, y ordenan el recobro para ambas circunstancias. Igualmente sucede que se condene a una entidad que no tiene que asumir el pago, como ocurre con las tutelas presentadas por usuarios del régimen subsidiado en las que los fallos condenan a los entes territoriales por pagos que deben hacer las empresas promotoras del régimen subsidiado o viceversa<sup>28</sup>.

### 5.1.4. *Primeras conclusiones*

Como se observa, hay una serie de reglas jurisprudenciales creadas por la Corte Constitucional que determinan el ámbito en que es procedente la tutela y que definen el marco en el cual ésta debe ser considerada. Igualmente hay normatividad expresa sobre el tema, que regula algunos aspectos (aunque persisten vacíos en otros) y que en los casos concretos ha sido inaplicada por la Corte. Adicionalmente, la cantidad de tutelas ha desbordado todas las previsiones. En los casos de las tutelas por medicamentos y procedimientos incluidos en el POS, hay una clara vulneración de los derechos de los usuarios y un intento de las entidades de no asumir sus responsabilidades, y de transferírselas al fondo de financiamiento público. Por eso aquí la tutela no sólo es el único remedio efectivo sino que, además, es imprescindible, pues resulta siendo un mecanismo no sólo de control de la calidad de los servicios, sino un límite a la arbitrariedad y al desconocimiento de la ley por parte de los actores del sistema. Por supuesto, no se puede obviar que subsisten problemas en la definición de algunos contenidos que dan margen a diferencias en la interpretación, pero allí bastaría con desarrollar reglamentaciones más precisas y aplicar un criterio de favorabilidad propio de la doctrina para la interpretación de los instrumentos que garantizan derechos humanos, por medio del cual se permita que las dudas en relación con la inclusión de un determinado servicio o medicamento que forma parte del POS, se resuelvan a favor de los usuarios.

De otro lado, en cuanto a las tutelas para exigir el reconocimiento de servicios (medicamentos y tratamientos) no incluidos en el Plan Obligatorio, esta situación es clara evidencia de tres realidades. Por una parte, los mecanismos previstos para resolver administrativamente estas solicitudes, que existen sólo para las peticiones de medicamentos, resultan insuficientes o inoperantes y por ello situaciones que deberían ser tramitadas por una vía alternativa terminan siendo objeto del recurso judicial. En segundo lugar, hay una clara insatisfacción de los usuarios porque las necesidades reales no se ven adecuadamente reflejadas en el contenido de los planes básicos. Esto es cierto, pues si bien

28. Esto lo manifiestan funcionarios de la Secretaría de Salud de Bogotá que fueron entrevistados por el equipo a cargo de este estudio.

hay eventos en que se trata de enfermedades de alto costo o padecimientos extraños, estos casos no representan la mayoría de los eventos; en otras palabras, un alto número de procedimientos, cirugías o exámenes que requiere normalmente la población no están contemplados en el plan mínimo de beneficios. Por ello, si se ampliara el POS y el POS-S en los elementos que más frecuentemente son solicitados vía tutela, éstas se reducirían, al tiempo que se verificaría un aumento en la calidad de la salud y un mejoramiento en la garantía global del derecho. Esto ya se ha demostrado con algunos ejemplos, como la inclusión del examen de carga viral y los antirretrovirales *Abacavir*, *Efavirenz* y *Lopinavir+Ritonavir* a partir del Acuerdo 282 de 2004, que determinó la disminución de las tutelas presentadas por este concepto por pacientes con VIH/Sida, con respecto a las presentadas antes de la inclusión en la norma<sup>286</sup>. En tercer lugar, la situación evidencia problemas en los mecanismos de control y vigilancia del sistema de salud y la incapacidad de éstos para dar solución a los conflictos que se presentan, por lo cual queda como única alternativa el litigio, que preferentemente ha sido el de la jurisdicción de tutela<sup>287</sup>. Pero aun es necesario valorar a profundidad los impactos negativos y positivos de la tutela, asunto del que nos ocuparemos a continuación.

## 5.2. *El debate sobre la acción de tutela en la protección del acceso al derecho a la salud*

La acción de tutela es concebida como uno de los mayores logros del constituyente de 1991. La importancia que este recurso tiene en la garantía y defensa de los derechos es incomparable con cualquier otro procedimiento judicial previsto en la Constitución y las leyes. En el caso del derecho a la salud, es necesario reconocer que la acción de tutela ha operado como una alternativa de acceso al goce efectivo del mismo<sup>288</sup>.

El aumento paulatino en el recurso a la acción de tutela y en los fallos favorables a los accionantes puede tener explicaciones variadas. En parte se debe al mayor conocimiento de la normatividad y la jurisprudencia de la Corte Constitucional por parte de los jueces; a una mayor apropiación de los ciudadanos de los derechos y el mecanismo de la tutela; así como a la promoción que de dicho recurso hacen las propias entidades aseguradoras o prestadoras de los servicios para poder obtener de esa manera el pago de los servicios con cargo al FOSYGA. Igualmente, los órganos de control y organizaciones no gubernamentales apoyan a los usuarios en la presentación de tutelas. En el caso particular de la Defensoría del Pueblo y las Personerías estas entidades incluso acompañan la elaboración de las mismas<sup>289</sup>.

---

286. Esta disminución en las tutelas la señala el informe de la Defensoría del Pueblo, que indica que de representar el 16,3% en el año 2003, las tutelas para la realización de exámenes pasaron a representar solamente el 4,4% en 200, Defensoría del Pueblo. Ob. cit., p. 4.

287. Aunque la tutela ocupa el lugar privilegiado, cabe mencionar que también hay asuntos relacionados con el derecho a la salud que se ventilan a través de las acciones populares y que se han tratado en ejercicio de la acción pública de inconstitucionalidad.

288. Esta tesis es sostenida por Alba Lucía Vélez (200). “La acción de tutela: ¿un mecanismo de protección del derecho a la salud y un proceso alterno para acceder a servicios de salud?” en *Revista Colombiana Médica*, volumen 36, No. 3. Ver: [<http://colombiamedica.univalle.edu.co/Vol36No3/cm36n3a10.html>].

289. En el informe de la gestión adelantada por la Personería de Barranquilla en el área de la salud, enviado en respuesta a requerimiento hecho por la Procuradora Delegada Preventiva en Materia de Derechos Humanos y Asuntos Étnicos mediante Oficio 18231 de marzo 30 de 2007, se menciona la creación de un grupo de atención jurídico-administrativa al interior de la Personería, que tiene como una de sus funciones “coadyuvar en la elaboración y presentación de derechos de petición, acciones de tutela, acciones de grupo o cumplimiento cuando la necesidad del servicio requerido lo

Lo anterior tiene aspectos positivos en tanto demuestra la apropiación por parte de la ciudadanía y las instituciones de los derechos y el compromiso con su defensa. No obstante, la alta frecuencia de las tutelas también debe ser vista como un claro indicador del aumento y persistencia de las violaciones del derecho a la salud; y desde la perspectiva del sistema de control y vigilancia, puede ser considerada una alarma frente a las falencias del mismo, pues se tiene que acudir a los jueces para que éstos tomen los correctivos necesarios, ante la incapacidad para remediar los problemas detectados a través de los canales de control administrativo. Esto permite esbozar la siguiente idea: las limitaciones del control administrativo en algunos casos, y en otras oportunidades, las fallas propias del sistema de salud en su conjunto, favorecen la creciente utilización de la acción de tutela para la reclamación de procedimientos, tratamientos, intervenciones y medicamentos.

En el primer caso, cuando el mecanismo de quejas y la labor de los entes encargados de la vigilancia no resultan efectivos o no responden satisfactoriamente a la demanda del ciudadano, éste debe acudir a la acción judicial. En otros casos, directamente, aun sin pasar por el sistema de quejas y reclamos, la persona opta por la tutela, esto último por el desconocimiento de los procedimientos e instancias existentes, la desconfianza en el sistema de quejas, o la mayor efectividad y significación que tiene una orden judicial frente a una decisión emanada de una autoridad administrativa, que a veces no culmina en una solución efectiva para la garantía del derecho. Pero por cualquiera de las dos vías, ya sea como último paso después de un procedimiento de control administrativo o directamente, lo cierto es que la tutela se ha convertido en el mecanismo de uso más frecuente para la garantía del derecho a la salud. Sin embargo, esto tiene ventajas y desventajas frente a los canales de control, y también plantea problemas y limitaciones propias, que los críticos de la jurisprudencia de la Corte han señalado. A continuación nos referiremos brevemente a este tema.

### 5.2.1. Las ventajas y desventajas de la tutela frente al sistema de quejas

Como se mencionó, el recurso a la acción de tutela como mecanismo para la satisfacción del derecho a la salud, presenta algunas ventajas con respecto a lo que es posible obtener a través del sistema de control administrativo. Por una parte, a través de la tutela es posible acceder a servicios de salud que serían imposibles de obtener por otra vía, como sucede en todos los eventos de atención en asuntos no previstos en el plan obligatorio o en tratamientos de alto costo cuando no se han completado los períodos mínimos de cotización. Igualmente, puede dar soluciones inmediatas a problemas que por otra vía podrían

---

amerite”, lo mismo que acompañar el proceso y hacer seguimiento al cumplimiento de los fallos judiciales y decisiones administrativas. En el caso de la Defensoría del Pueblo, esta entidad tiene establecido, como mecanismo subsidiario a la gestión directa ante una queja o petición ciudadana en materia de salud, el “asesorar, elaborar o proyectar una acción de tutela para que se protejan los derechos fundamentales de la persona afectada por la negación del servicio o negación de prestaciones médico-asistenciales, sean intervenciones, actividades o medicamentos por parte de una administradora de salud, argumentando que no están incluidos en el Plan Obligatorio de Salud -POS-, ya sea del Régimen Contributivo o del Régimen Subsidiado”. Ver: [[http://www.defensoria.org.co/red/?\\_item=0603&\\_secc=06&ts=1](http://www.defensoria.org.co/red/?_item=0603&_secc=06&ts=1)]. Por su parte, funcionarios de la Dirección de Quejas y Reclamos de la Defensoría del Pueblo afirmaron en entrevistas sostenidas con el equipo investigador, que esta entidad ha tratado de racionalizar el uso de la tutela desarrollando procedimientos para que los funcionarios no acudan a ésta de manera indiscriminada y por eso, aunque la Defensoría sí elabora o asesora la presentación de un número importante de acciones de tutela, considera que se tramitan menos que en otras instancias, por ejemplo en las personerías.

verse dilatados en el tiempo. Así por ejemplo, en caso de dificultades con relación a la inclusión, corrección o actualización de la información de los beneficiarios del régimen subsidiado en las bases de datos, ya sea porque la encuesta SISBEN no se ha realizado o porque no se ha renovado, cuando el afectado interpone la acción de tutela contra la dirección territorial de salud, ésta explica al juez que las depuraciones de las bases de datos del SISBEN se hacen para tener la información actualizada y que el ente encargado de realizar la encuesta es el Departamento de Planeación Distrital. En consecuencia, el juez debe ordenar a Planeación hacer la encuesta y una vez resulte como beneficiario, la respectiva secretaría municipal, distrital o departamental de Salud lo debe ingresar al sistema como afiliado del régimen subsidiado. De esta manera, la tutela resulta siendo un mecanismo para la realización preferente de la encuesta a los usuarios, sin necesidad de que se espere año tras año a la realización general de la misma<sup>290</sup>.

Por otra parte la tutela es un mecanismo que tiene para su resolución términos un poco más reducidos que los que se derivan de las actuaciones administrativas y así mismo cuenta con un mecanismo sancionatorio especial destinado a garantizar el cumplimiento de la decisión judicial, del cual, en estricto sentido, carecen las decisiones derivadas de la actuación administrativa, no porque no existan mecanismos para lograr su cumplimiento, sino porque éstos no tienen la especificidad ni los mismos alcances sancionatorios que tiene el incidente de desacato en materia de tutela<sup>291</sup>. Todo esto hace que la tutela sea considerada una herramienta que muestra una efectividad superior en relación con la garantía plena del derecho, frente a los impactos del trámite de las reclamaciones a través del sistema de quejas administrativo.

Sin embargo, también es claro que el sistema de quejas puede tener algunas ventajas con respecto al mecanismo judicial de control. Una de éstas está dada por la posibilidad que existe de atacar problemas del funcionamiento del sistema de salud que inciden en la garantía del derecho, que difícilmente podrían ser tratados mediante la acción judicial. Esto sucede por ejemplo con lo relacionado con el manejo de los recursos económicos, la contratación o el cumplimiento de las normas de calidad y habilitación. Si estos asuntos se ventilaran a través de la administración de justicia, serían de conocimiento de los jueces ordinarios, lo que implica términos más extensos y costas procesales, pues a menos que se tratara de vulneraciones inminentes a un derecho fundamental, escaparían a la jurisdicción de tutela. En estos eventos, la resolución de los conflictos a través del sistema de quejas parece una buena alternativa. El problema está en que los impactos de las decisiones o actuaciones que se toman como consecuencia de la actuación iniciada por una queja o reclamación presentada por usuarios afectados, resulta bastante limitada, no sólo porque resuelven el caso concreto sin tener efectos generales (porque en principio esto mismo se predica de las acciones de tutela), sino porque en realidad, a pesar de la

---

290. Esta práctica fue narrada por funcionarios que trabajan en el área de tutelas de la Dirección de Aseguramiento de la Secretaría de Salud de Bogotá, en entrevista realizada el 14 de junio de 2007 por el equipo a cargo de este estudio. Así mismo, sobre este punto ver la sentencia T-840 de 1999, M.P. Eduardo Cifuentes Muñoz, en la cual la Corte Constitucional consideró que la mora de la administración distrital en realizar la encuesta Sisben que impide el acceso al régimen subsidiado en salud, puede derivar en la violación de derechos fundamentales, lo cual hace procedente la acción de tutela. Sobre la utilización de la tutela para la realización de la encuesta Sisben ver también la sentencia T-862 de 2002, M.P. Alfredo Beltrán Sierra.

291. Artículo 2 del Decreto 291 de 1991 “Por el cual se reglamenta la acción de tutela consagrada en el artículo 86 de la Constitución Política”.

existencia de inconformidades reiterativas y recurrentes en un mismo aspecto, no se verifican cambios estructurales y las vulneraciones persisten.

Sin embargo, no se puede negar que de una u otra manera las quejas constituyen un insumo muy importante para la labor de control, aunque no todas las veces las potencialidades de este insumo son utilizadas de la misma manera. Así, es posible distinguir que en algunas de las entidades encargadas del trámite de quejas, éstas son objeto de un análisis más detallado y finalmente a partir de ellas se configuran prácticas de retroalimentación y de exhortación a las autoridades concernidas, que intentan incidir en los problemas detectados a nivel de la política pública. Quizás el mejor ejemplo de esta labor es la desempeñada por la Defensoría del Pueblo, que ha mostrado cómo las reiteradas quejas de los usuarios sobre un tema en relación con el derecho a la salud pueden dar origen a una acción del ente de control, lo que se expresa con claridad en varias de las resoluciones defensoriales relacionadas con el tema<sup>292</sup>. En los otros órganos de control se pudo constatar que el aprovechamiento de las quejas es menor<sup>293</sup>.

Por su parte, la tutela ha generado un mayor impacto en la política pública, no sólo porque la jurisprudencia busca irradiar todo el ordenamiento jurídico convirtiéndose en parámetro de actuación tanto para los jueces como para los funcionarios, e incluso para los particulares, sino porque está generando decisiones que inciden en el manejo financiero del sistema y afectan una función esencial del Estado, como es la administración de justicia. En esa medida, el impacto de la acción de tutela en la política pública es más amplio que el logrado a través del sistema de quejas, aunque resulta también insuficiente, pues no alcanza a ser un recurso masivo, ni las decisiones se extienden a la generalidad de la población, al tiempo que encuentra límites para transformar los problemas estructurales detectados, en algunos casos derivados de la forma como el derecho ha sido concebido por la propia jurisprudencia.

### *5.2.2. Los problemas y limitaciones propios de la tutela como mecanismo para garantizar el derecho*

El uso de la tutela como mecanismo alternativo de acceso al derecho ha generado una serie de consecuencias de diverso orden, que han llevado a que se cuestione duramente el papel que la Corte Constitucional ha desarrollado en esta materia.

#### *5.2.2.1 Las inequidades de la tutela: ¿la mayor garantía del derecho pero para los incluidos?*

La tutela ha funcionado en forma relativamente apropiada como mecanismo para acceder a las prestaciones médicas asociadas al derecho a la salud para los petitionarios que

---

292. Ver Resolución Defensorial No. 006 de 2001 Desvío de recursos del régimen subsidiado; No. 010 Exclusión de afiliados al régimen subsidiado y duplicación de afiliaciones al Sistema General de Seguridad Social en Salud; No. 020 de 2002 Situación hospitalaria a escala nacional; No. 022 de 2002 Represamiento quirúrgico en el Instituto de Seguros Sociales. También fue inspirado en las quejas de salud recibidas por esta entidad el estudio titulado “Evaluación de los servicios de salud que brindan las empresas promotoras de salud” (200).

293. Las dificultades para la retroalimentación de las políticas públicas a partir de las quejas se ilustraron en el capítulo 4 de este estudio.

recurren a ella. En aproximadamente el 80% de los casos, la tutela es concedida. Sin embargo sus efectos en términos de equidad son más discutibles, en primer lugar, porque genera decisiones que benefician a quienes ya hacen parte del sistema, en detrimento de quienes aún no han sido incluidos y por lo mismo resultan más vulnerables<sup>294</sup>.

La evidencia existente muestra que la tutela no sólo no corrige las desigualdades frente al sistema de salud sino que incluso podría acentuarlas, pues quienes mejores prestaciones reciben del sistema son quienes más se benefician de la tutela. En efecto, una reinterpretación de los estudios existentes muestra que las personas que pertenecen al régimen contributivo, que tienen un POS más completo, utilizan la tutela de manera mucho más frecuente, tanto en términos absolutos como relativos, para asegurar su derecho, que aquellas personas que pertenecen al régimen subsidiado o que aquellos que se encuentran únicamente vinculados.

Para llegar a esa conclusión, cruzamos la información global sobre los afiliados al sistema con la información sobre el régimen al que pertenecían las personas que habían presentado tutelas en un año específico. El cálculo se realizó con base en los datos de Acosta, citados por Planeta Paz, sobre afiliación para el 2003, y en el estudio sobre tutelas que realizó la Defensoría del Pueblo que para el año 2003 permitía determinar a que régimen pertenecían los peticionarios de la tutela, tomando en consideración cuál había sido la entidad demandada. Los datos están en el siguiente cuadro:

|                                                               | I    | II   | III   |
|---------------------------------------------------------------|------|------|-------|
| Contributivo                                                  | 35,3 | 73,3 | 207,6 |
| Subsidiado                                                    | 22,9 | 2,9  | 12,7  |
| Vinculados                                                    | 38,2 | 13,4 | 35,1  |
| Otros                                                         | 3,6  | 9,2  |       |
| Total                                                         | 100  | 98,8 |       |
| I: Porcentaje de la población según tipo de vinculación*      |      |      |       |
| II: Total de tutelas en el país en porcentaje según régimen** |      |      |       |
| III: Porcentaje sub o sobrerrepresentación = (II/I) *100      |      |      |       |

294. Una síntesis de las objeciones básicas a la jurisprudencia en este sentido están en la aclaración de voto del magistrado Rodrigo Uprimny Yepes a la sentencia T-1207 de 2001, M.P. Rodrigo Escobar Gil.

\* Ver Adriana Rodríguez et al. (200). "La garantía de la salud como derecho integral" En Colombia: Diálogo Pendiente. Bogotá, Planeta Paz, p. 110. "Otros" corresponde en este caso a personas afiliadas a regímenes especiales.

\*\* Ver Defensoría del Pueblo. Ob. cit., p. 36, Cuadro No. 3 sobre entidades demandadas. Aunque explícitamente el cuadro no señala a qué régimen pertenece el peticionario, es razonable inferir que si la demandada era en ese momento una EPS, entonces hacía parte del régimen contributivo; si era una ARS, entonces el demandante hacía parte del régimen subsidiado; y si demandaba a un ente territorial, se trataba probablemente de población subsidiada y vinculada. El resto de demandados fue clasificado en "otros", por ser imposibles de clasificar de manera más precisa.

Este cuadro muestra entonces que mientras sólo el 3% de la población hace parte del régimen contributivo, el 73% de las tutelas provienen de personas vinculadas a ese régimen, con lo cual dicho régimen estaría sobrerrepresentado en más de 100% en la presentación de tutelas. Por el contrario, las personas pertenecientes al régimen subsidiado se encuentran subrepresentadas pues su participación en tutelas es de sólo 3%, a pesar de que constituyen el 23% de la población: su participación en tutelas representa entonces únicamente 13% del porcentaje que le correspondería si las personas de los distintos regímenes recurrieran exactamente de la misma forma a la tutela. Algo semejante sucede con los vinculados.

Este cuadro permite entonces calcular la mayor frecuencia relativa con la que una persona del régimen contributivo recurre a la tutela frente a una persona del régimen subsidiado o de los vinculados, lo cual se puede calcular dividiendo el porcentaje de sobrerrepresentación en tutela de las personas pertenecientes al régimen contributivo frente a la subrepresentación de aquellos que hacen parte del régimen subsidiado o de los vinculados. Esto permite concluir que una persona del régimen contributivo recurre aproximadamente 16 veces más (esto es, 1600%) a la tutela, que una persona que hace parte del régimen subsidiado, y 7 veces más que un vinculado.

Ahora bien, este cuadro debe ser matizado pues desafortunadamente las cifras son aproximadas, ya que no es posible saber a qué régimen pertenece un número considerable de personas, por cuanto las fichas elaboradas por la Corte Constitucional en su momento, y que han servido de base a las investigaciones de la Defensoría del Pueblo, no establecen a qué régimen pertenece el peticionario. Por consiguiente, fue necesario establecer dicho régimen de manera indirecta, a partir de la referencia a la entidad demandada, esto es, si es una EPS del régimen contributivo, una entidad del régimen subsidiado, una entidad territorial o una entidad de la red hospitalaria, que atiende a vinculados. En el cálculo asumimos que si la Defensoría hablaba de un demandado que era una EPS, entonces se trataba de un usuario del régimen contributivo, mientras que si la entidad demandada era una ARS era del régimen subsidiado, y si era una entidad territorial era un vinculado. Pero el dato es aproximado, pues no siempre los peticionarios demandan a la entidad que corresponde, sino que, además, existen EPS que administran tanto regímenes contributivo como subsidiado, y no es siempre claro a qué régimen pertenece una persona que demanda a una entidad territorial, ya que puede ser alguien del régimen contributivo o alguien del régimen subsidiado.

Por ello decidimos precisar un poco más el cálculo, con base en los datos suministrados por la misma Defensoría del Pueblo, pero esta vez en su *Informe 2003-2005*. En efecto, para ese año fue posible, con base en el Tablero 9 de ese informe, afinar el cálculo, pues en esa ocasión la Defensoría precisó los eventos en que las EPS demandadas eran solamente del régimen contributivo, solamente del subsidiado o tenían afiliados en ambos regímenes. Los datos eran entonces los siguientes para los años 2003, 2004 y 2005:

|                               | 2003   |       | 2004   |       | 2005   |       | Total   |       |
|-------------------------------|--------|-------|--------|-------|--------|-------|---------|-------|
| Entidad demandada             | Número | %     | Número | %     | Número | %     | Número  | %     |
| EPS contributivo              | 28.366 | 54,6  | 37.175 | 51,6  | 46.127 | 56,9  | 111.668 | 54,5  |
| EPS contributivo y subsidiado | 9.860  | 19,0  | 14.353 | 19,9  | 13.617 | 16,8  | 37.830  | 18,5  |
| Entes territoriales           | 7.305  | 14,1  | 11.414 | 15,8  | 11.275 | 13,9  | 29.994  | 14,6  |
| EPS subsidiado                | 1.432  | 2,8   | 2.575  | 3,6   | 4.096  | 5,1   | 8.103   | 4,0   |
| Otros                         | 4.981  | 9,6   | 6.516  | 9,0   | 5.902  | 7,3   | 17.399  | 8,5   |
| Total tutelas salud           | 51.944 | 100,0 | 72.033 | 100,0 | 81.017 | 100,0 | 204.994 | 100,0 |

Estos datos son interesantes pues muestran que a pesar de las variaciones cuantitativas, debido al aumento considerable de las tutelas por salud en esos años, la composición relativa (en porcentaje) de las entidades demandas es estable. Aproximadamente el % corresponde a EPS solamente del régimen contributivo, el 4% a EPS exclusivamente del régimen subsidiado, aproximadamente el 18% a EPS que trabajan en ambos regímenes, alrededor de un 14% a entidades territoriales y un 8% a otras entidades, como IPS o entidades de regímenes especiales. Esto indicaría una cierta estabilidad en el uso relativo de la tutela según la pertenencia de las personas a un determinado régimen.

Además, esos datos permiten una clasificación de usuarios más simple que la realizada en el ejercicio anterior pero más confiable, pues es posible distinguir tres grupos: de un lado, aquellos peticionarios que pertenecen al régimen contributivo, que corresponden a aquellos casos en que la entidad demandada es una EPS exclusivamente del contributivo; de otro lado, los usuarios que pertenecen ya sea al régimen subsidiado o son vinculados, que corresponden a aquellos casos en que la entidad demandada es una EPS exclusivamente del régimen subsidiado o una entidad territorial; y finalmente aquellos eventos en que no es posible determinar la pertenencia del usuario a un determinado régimen de seguridad social, pues la entidad demandada es una EPS que trabaja en ambos regímenes o se trata de las demandas contra entidades privadas, IPS u otras. El cálculo es simple y permite clasificar con mayor confiabilidad los regímenes a que pertenecen los peticionarios de las tutelas, como lo hicimos en el siguiente cuadro:

|                                         | 2003   |       | 2004   |       | 2005   |       | Total   |       |
|-----------------------------------------|--------|-------|--------|-------|--------|-------|---------|-------|
| Régimen                                 | Número | %     | Número | %     | Número | %     | Número  | %     |
| Peticionario del contributivo           | 28.366 | 54,6  | 37.175 | 51,6  | 46.127 | 56,9  | 111.668 | 54,5  |
| Peticionario del subsidiado o vinculado | 8.737  | 16,8  | 13.989 | 19,4  | 15.371 | 19,0  | 38.097  | 18,6  |
| Sin determinar                          | 14.841 | 28,6  | 20.869 | 29,0  | 19.519 | 24,1  | 55.229  | 26,9  |
| Total tutelas salud                     | 51.944 | 100,0 | 72.033 | 100,0 | 81.017 | 100,0 | 204.994 | 100,0 |

Este cuadro permite precisar la composición relativa de los usuarios de la tutela, pues en esos años el 4,% corresponden al régimen contributivo, mientras que 18,6% o son vinculados o pertenecen al subsidiado; finalmente, el 27% es imposible de determinar. Con esos datos tanto absolutos como de porcentaje es posible precisar con mayor rigor la frecuencia con que acuden a la tutela los usuarios de los distintos regímenes. Así, teniendo en cuenta las cifras absolutas de 2003, es posible calcular una especie de tasa de frecuencia de uso de la tutela según la pertenencia del usuario a los distintos regímenes. Para ello tomamos el número absoluto de tutelas en salud en 2003, los afiliados a los distintos regímenes, según los datos sobre afiliación para el 2003 de Acosta, citados por Planeta Paz, y calculamos la correspondiente tasa por cada 100.000 usuarios. El resultado es el siguiente:

|                        | Tasa uso de tutela por 100.000 usuarios en 2003 |                   |                   |
|------------------------|-------------------------------------------------|-------------------|-------------------|
| Régimen                | (1) Tutelas                                     | (2) Afiliados     | Tasa= 1/2*100.000 |
| Contributivo           | 28.366                                          | 15.425.723        | 184               |
| Subsidiado o vinculado | 8.737                                           | 26.707.214        | 33                |
| Otros o sin determinar | 14.841                                          | 1.584.641         |                   |
| <b>Total</b>           | <b>51.944</b>                                   | <b>43.717.578</b> | <b>119</b>        |

Este dato de diferencia de tasas, según que los peticionarios pertenezcan a uno u otro régimen, es menos dramático que el elaborado en el ejercicio precedente, pero es suficiente para mostrar con contundencia que usan mucho más frecuentemente la tutela quienes hacen parte del régimen contributivo que quienes hacen parte de otros regímenes, pues la tasa de los primeros en 2003 por 100.000 usuarios era de 184, frente a una tasa de 33 de quienes eran vinculados o hacían parte del régimen subsidiado. Esto significa que la frecuencia de uso de la tutela de los primeros es casi seis veces más alta (,6) que la de los segundos, cifra ésta muy significativa.

Estos datos son suficientes entonces para concluir que quienes más recurren a la tutela son quienes hacen parte del régimen contributivo. Además, esa conclusión concuerda con otros estudios que han llegado a resultados semejantes.

En relación con las proporciones de la tutela frente al comportamiento dentro de cada régimen, los estudios revisados, a pesar de referirse a períodos disímiles, coinciden en señalar que la mayor parte de las acciones de tutela para reclamar la prestación de servicios de salud son interpuestas por usuarios del régimen contributivo, y que éstas superan ampliamente las presentadas por usuarios del régimen subsidiado. Así, el Estudio sobre Trascendencia e Impacto Socioeconómico de la Acción de Tutela en el Sistema de Seguridad Social Colombiano, elaborado por la Organización Iberoamericana de Seguridad Social y el CES, muestra que entre julio de 2003 y junio de 2004 se presentaron entre 0.000 y 60.000 tutelas, y que, de las tutelas revisadas por la Corte, las interpuestas por usuarios pertenecientes al régimen contributivo representaban el 44%, las de usuarios

del régimen subsidiado el 10,1%, el 3% correspondía a los participantes vinculados y el 4,8% era para otros regímenes. El 3,8% restante corresponde a las tutelas por pensiones y riesgos profesionales<sup>29</sup>. Estas cifras no son estadísticamente representativas pues la Corte no selecciona las tutelas aleatoriamente sino por su interés jurídico, pero vale la pena destacar que aquí también son los usuarios del régimen contributivo quienes en mayor medida presentan tutelas por salud.

Igualmente, el informe de la Defensoría del Pueblo *La tutela y el derecho a la salud: período 2003-2005*, al analizar la participación de la tutela contra entidades de régimen subsidiado respecto de la tutela contra todas las demás entidades, incluidas las que administran conjuntamente contributivo y subsidiado, señala que el mayor número de éstas se dirigió contra entidades que prestan servicios exclusivamente en el régimen contributivo, seguidas de las acciones contra las entidades que administran simultáneamente el régimen contributivo y el subsidiado, y muestra que sólo el 4% del total de las tutelas presentadas en el período provenía de la población afiliada al régimen subsidiado<sup>296</sup>.

La Defensoría indica que, entre otras, las razones que explican la baja frecuencia de tutelas de los usuarios del régimen subsidiado son

*... que dicha población reconoce que el Régimen Subsidiado es limitado o que lo ven como gratuidad del Estado y no como un derecho. Otra razón es que las acciones se instauran contra las entidades territoriales debido a la limitación del Plan Obligatorio de Salud Subsidiado –POSS– y que la gente reconoce más el Sisbén como una institución del Estado y no lo relaciona con la aseguradora –ARS–* <sup>297</sup>.

Esta diferencia puede ser interpretada de distintas formas; algunos podrían considerar que es un problema de satisfacción distinta en la atención médica o en el acceso al servicio médico; esto es, que las personas del subsidiado reciben mejores servicios y están más satisfechas, por lo que demandan menos. Pero eso no sólo es contrario al diseño del sistema, que confiere un plan más robusto de beneficios para el contributivo, sino que, además, los datos existentes muestran niveles de satisfacción por la atención en salud muy semejantes en los tres regímenes. En todos los casos, y como lo indicamos en el capítulo 2 de este informe, , varía entre el 7% y el 80% el porcentaje de usuarios que considera que la atención es buena tanto en el contributivo como en el subsidiado y los vinculados<sup>298</sup>.

Por consiguiente, la explicación parece estar más en un problema de acceso a la justicia, esto es, que quienes hacen parte del régimen contributivo y sienten afectado su derecho a la salud, tienen mayor conciencia del derecho y mayor facilidad de acceso al sistema judicial, que quienes pertenecen al régimen subsidiado o los vinculados, y por ello los primeros recurren más frecuentemente a la tutela.

---

29. Ver: Organización Iberoamericana de Seguridad Social – CES (200). *“Trascendencia e impacto socioeconómico de la acción de tutela en el Sistema de Seguridad Social colombiano, Informe Final primera etapa: Estudio exploratorio,”* p. 6.

296. Defensoría del Pueblo (2007). *La tutela y el derecho a la salud: período 2003-2005*, Bogotá. pp. 37 y 41.

297. *Ibíd.*, p. 41.

298. Ver los datos tomados de las encuestas de calidad de vida del DANE de 2003, citados por Adriana Rodríguez et al. (200). *“La garantía de la salud como derecho integral”* en *Colombia diálogo pendiente*, Planeta Paz, Bogotá, p. 132.

Ahora bien, esta diferencia de uso de la tutela es problemática en términos de equidad, pues quienes pertenecen al régimen contributivo no sólo reciben un mejor paquete de beneficios sino que además pertenecen en general a estratos más altos y tienen mayor capacidad de pago. En efecto, mientras que en 200, el 43% de quienes hacían parte del régimen contributivo pertenecían a su vez al quintil de mayores ingresos, ese porcentaje era de sólo 3,% para los usuarios del régimen subsidiado y de 9% para los vinculados <sup>299</sup>. De esto se colige que la tutela, a pesar de ser un muy buen mecanismo de satisfacción individual del derecho a la salud, tendería entonces a reproducir, e incluso acentuaría, los problemas de inequidad del sistema de salud en Colombia. Esto no significa obviamente que deba desmontarse la tutela frente a afectaciones individuales al derecho a la salud, sino que ésta resulta insuficiente para enfrentar equitativamente la crisis de la salud en el país.

### 5.2.2.2. Las barreras de uso de la tutela y sus límites para la satisfacción del derecho

En segundo lugar, aunque la acción de tutela es un recurso planteado para que a él pueda acceder cualquier persona, en la práctica hay algunas barreras de acceso derivadas del desconocimiento de los derechos o de la falta de asesoría legal, que inciden en que el acceso al recurso judicial sea desigual. Esto es así porque aunque no se requiera de un abogado para su interposición, es claro que en todo caso el manejo de los procedimientos y términos jurídicos requiere un cierto conocimiento, unas mínimas condiciones materiales para la elaboración de la acción y su presentación ante la instancia judicial, lo que corrobora las dificultades generales que se tienen para acceder a la administración de justicia que, no son exclusivas de la tutela, y que hacen que a ésta finalmente no accedan todas las personas de igual manera y que particularmente las personas con menores niveles de educación o de escasos recursos sean las que enfrentan mayores dificultades para ello<sup>300</sup>.

Un problema adicional, se verifica porque en ocasiones ni siquiera la tutela es suficiente para satisfacer plenamente el derecho, pues también se ha observado como

*... práctica recurrente por parte de algunas entidades aseguradoras que el cumplimiento de la orden del juez solo se respeta durante los primeros meses o cuando media nuevo apremio judicial, pero luego se incurre nuevamente en las mismas fallas de servicio* <sup>301</sup>.

Por eso muchos casos terminan en desacato, lo que se verifica también en que incluso a veces las quejas ciudadanas son por incumplimiento de los fallos de tutela<sup>302</sup>. A veces

299. Ver Carmen Elisa Flórez et al. *Evolución de la equidad...* cit., p. 3.

300. Sobre algunos de los problemas de la administración de justicia en Colombia ver Mauricio García Villegas, César A. Rodríguez Garavito y Rodrigo Uprimny (2006). *¿Justicia para todos? Sistema judicial, derechos sociales y democracia en Colombia*. Editorial Norma, Bogotá.

301. Defensoría del Pueblo (2007). Ob. cit., p. 33.

302. Ejemplo de esto lo constituyen los datos suministrados por la Personería de Bogotá que reporta, en una relación de algunos asuntos en trámite de vigilancia especial suministrada al equipo investigador de este estudio, un total de 32 casos en los que hay tutelas incumplidas, todas contra la misma entidad promotora de salud, y algunas también con incidentes de desacato que pese a ello no han logrado el cumplimiento de las órdenes judiciales. Igualmente en el informe de la gestión adelantada por la Personería de Barranquilla en el área de salud, enviado en respuesta a requerimiento hecho por la Procuradora Delegada Preventiva en Materia de Derechos Humanos y Asuntos Étnicos mediante Oficio 18231 de marzo 30 de 2007, se señala que "... en más de una ocasión usuarios que a través del mecanismo de tutela han conseguido la protección de sus (sic) derecho han tenido que iniciar incidentes de desacato toda vez que la autoridades (sic) regional manifiestan que es Bogotá donde aprueban la compra del medicamento o que no hay presupuesto, siendo poco el margen de gestión local".

hay cumplimientos parciales de las entidades, para evitar la condena y dejar al usuario sin la posibilidad de solicitar la tutela por el mismo hecho. La Defensoría ha considerado que esta práctica puede constituir incluso una conducta penalizada como “fraude a resolución judicial”<sup>303</sup>, pero además se genera un círculo vicioso, pues la persona se queja, pone la tutela, se la resuelven y luego vuelve a quejarse porque incumplen la tutela. Esto es muy importante pues estamos ante un problema de incumplimiento del derecho, que no se verifica sólo por la falta de acatamiento de las normas legales sino incluso por el incumplimiento de una decisión judicial, lo que traspasa los límites de lo aceptable en el Estado de Derecho.

En tercer lugar, como de acuerdo con la concepción del derecho que ha tenido la jurisprudencia, la regla general es la de la conexidad y sólo en casos excepcionales se ha aceptado que la salud es un derecho fundamental autónomo de aplicación inmediata, en muchos casos sólo quienes pueden demostrar que además del derecho a la salud se está violando también el derecho a la vida, la integridad u otro derecho fundamental pueden acceder a este mecanismo. Ello en la práctica se refleja en que sean los casos más graves los que terminan siendo resueltos por esta vía, y que quede por fuera un gran número de situaciones en las que también se compromete la garantía del derecho, pero resulta menos evidente la conexidad. Es el caso por ejemplo de las demoras en las citas de consulta externa, de los medicamentos que no se entregan a tiempo en dolencias leves, o de las reclamaciones relacionadas con el maltrato en la atención al usuario, asuntos que no resultan dramáticos pero que igualmente configuran violaciones del derecho a la salud.

### **5.2.2.3. Los impactos negativos de la tutela sobre la igualdad y la sostenibilidad financiera del sistema de salud**

Adicionalmente, hay problemas de igualdad, en particular con los fallos que autorizan tratamientos de alto costo, en el entendido de que no es factible que todas esas prestaciones sean universalizables, y en especial si el servicio es demasiado costoso difícilmente podrá ser otorgado a cualquier otra persona que lo requiera, por lo que termina convirtiéndose en un privilegio a favor de quien presentó la tutela.

De otro lado, en cuanto a la jurisprudencia que ha ordenado el suministro de medicamentos y procedimientos por fuera de los planes obligatorios, también recaen las críticas de quienes argumentan que estas decisiones pueden llevar a la quiebra financiera del sistema, puesto que se están reconociendo gastos que no estaban previstos inicialmente bajo el modelo de aseguramiento<sup>304</sup>. Esto genera “un costo de oportunidad importante

---

303. El artículo 3 del Decreto 291 dispone que “el que incumpla el fallo de tutela o el juez que incumpla las funciones que le son propias de conformidad con este decreto incurrirá, según el caso, en fraude a resolución judicial, prevaricato por omisión o en las sanciones penales a que hubiere lugar. También incurrirá en la responsabilidad penal a que hubiere lugar quien repita la acción o la omisión que motivo la tutela concedida mediante fallo ejecutoriado en proceso en el cual hubiera sido parte”.

304. Un ejemplo de esta postura se puede ver en Ana María Beltrán (2004). “El derecho a la salud en la jurisprudencia de la Corte Constitucional: ¿un problema en la definición de las políticas públicas o en la interpretación de un sistema de aseguramiento? Análisis a propósito de la sentencia T-603 de 2004” en *Revista Tutela, Acciones Populares y de Cumplimiento*. Vol. 7, Bogotá, Legis, pp. 1620 a 1632.

para el sistema, en la medida en que se dejan de utilizar recursos cuyo principal destino es financiar el aseguramiento de la población”<sup>30</sup>.

Desde otra perspectiva, se cuestiona la intromisión de los jueces en asuntos que deberían ser sometidos al debate democrático, pues allí deberían ventilarse las opciones para garantizar los derechos sociales, en una sociedad en donde no hay recursos suficientes para satisfacerlos todos de manera inmediata. A lo anterior, se suman los cuestionamientos que refieren la falta de pericia y conocimiento de los jueces en estos temas, ya que la tutela en salud es conocida en muchos casos por jueces que están más formados en otras materias.

Igualmente, el desmedido uso de la tutela incrementa los costos de transacción, porque se requiere la dedicación de funcionarios en las EPS, IPS y los entes territoriales para atender exclusivamente la respuesta de las acciones en dichas entidades, a lo que se suma obviamente la congestión en los despachos judiciales. De la misma manera, la tutela se ha convertido en muchos casos en un trámite o requisito adicional para acceder al derecho, de manera que el mecanismo de satisfacción se pervierte, desfigurando su razón de ser y generando efectos no previstos y poco deseables<sup>306</sup>. Incluso hay cifras que muestran que los valores recobrados se concentran en unas pocas empresas, “lo que sugiere que ha habido un proceso de aprendizaje por parte de las empresas aseguradoras que ha permitido que puedan adelantar un mayor número de recobros”<sup>307</sup>. En esa medida la tutela genera incentivos perversos en las EPS, porque las habilita para repetir contra el Estado y que sea éste el que pague el costo del servicio, sin que se considere la afectación causada al beneficiario, se generen cambios a futuro, ni se obligue a que haya garantías para que la conducta violatoria de los derechos no ocurra de nuevo.

### 5.2.3. Algunas conclusiones

Frente a los cuestionamientos a la jurisprudencia relacionada con la procedencia y alcances de la tutela en salud, la Corte ha defendido sus posiciones resaltando la importancia de los derechos sociales, y los deberes del Estado frente a éstos, que no admiten evasiones y no pueden estar sujetos a la disponibilidad de recursos. En cuanto a las críticas relacionadas con las consecuencias prácticas de los fallos de tutela, la defensa se centra en plantear que el juez debe pensar primero en la realización de los derechos que en las consecuencias de sus fallos, aunque esto tampoco implica un desconocimiento total de los efectos. Así mismo, en cuanto a los argumentos de afectación del procedimiento democrático, se rebate que los tribunales constitucionales están llamados a establecer

30. Diana Pinto Masis y María Isabel Castellanos (2004). “Caracterización de los recobros por tutela y medicamentos no incluidos en los planes obligatorios de salud” en *Revista Gerencia y Políticas de Salud*. Vol. 3 No. 7, Pontificia Universidad Javeriana, Bogotá, p.6. Estas autoras señalan que con los mismos recursos que se pagaron recobros en el régimen contributivo más “los costos administrativos de su procesamiento se hubiera podido pagar la afiliación de aproximadamente 199 mil personas entre el 2002 y 327 mil personas en el 2003. De manera similar en el régimen subsidiado se hubiera podido pagar la afiliación de aproximadamente 27 mil personas en el 2002 y 43 mil en el 2003”.

306. Con relación a la práctica según la cual la tutela se convierte en un trámite adicional para lograr la atención en salud, la Corte Constitucional ha dicho lo siguiente: “Ello obliga a la Corte a precisar que la tutela no es un trámite administrativo o un requisito previo, el cual deba cumplirse con el fin de lograr la atención en salud. Considera la Corte que la conversión de la tutela en un trámite adicional, además de desdibujar la protección constitucional, entraña una violación al artículo 84 de la Carta, pues la atención en materia de salud ha sido suficientemente reglamentada y, dada su naturaleza de servicio público, bien puede aplicarse la prohibición constitucional contenida en el precepto mencionado”. Ver sentencia T-1384 de 2000, M.P.(E) Martha Victoria Sánchez Méndez.

307. Pinto y Castellanos. Ob. cit., p. 7.

límites a las mayorías que tienen el poder de determinar el alcance de los derechos y por lo mismo podrían terminar afectando a los sectores minoritarios y más vulnerables, por lo cual la intervención de la Corte, cuando opera a favor de estos últimos, contribuye al proceso democrático<sup>308</sup>.

Las críticas relacionadas con los efectos en la sostenibilidad financiera del sistema o los incentivos para los recobros son válidas principalmente en relación con los fallos que autorizan la prestación del servicio en eventos no cubiertos por el Plan Obligatorio de Salud, que serían –siguiendo las consideraciones de Mauricio García y María Paula Saffón– los verdaderos casos de activismo judicial, pues aquí la sobrecarga del fondo público que asume los pagos a través de los recobros podría llegar al límite en algún momento. No obstante, dichos cuestionamientos carecen de aplicación en relación con el problema del desconocimiento del derecho con respecto a tratamientos o medicamentos que sí están incluidos en los planes de beneficios y a pesar de ello no son suministrados si previamente no se interpone la tutela, pues en estos casos ya existen unos recursos destinados específicamente para la atención en salud y media la celebración de unos contratos para garantizar el contenido del plan obligatorio, por lo que se trata de obligaciones claramente definidas que no pueden eludirse.

Es por ello que se considera que el tribunal constitucional ha cumplido en todo caso un papel muy importante en el control de la política pública que busca la materialización del derecho humano a la salud, principalmente en las decisiones tomadas en el ejercicio de la revisión de tutelas<sup>309</sup>. Aquí, el control constitucional tiene diversos grados de intensidad. Es un poco menor en los casos concretos y crece cuando se exhorta a las autoridades públicas a tomar determinadas acciones. Cuando se ejerce con mayor fuerza es en las declaratorias de estado de cosas inconstitucional, que se producen tras la constatación de situaciones de sistemática y grave violación de derechos, que ameritan considerar que se ha roto el orden constitucional y se está actuando por fuera del derecho. En consecuencia, se debe ordenar a las autoridades públicas correspondientes la adopción de una serie de medidas tendientes a corregir los problemas detectados y se debe configurar un diseño, ejecución y evaluación de las políticas públicas a partir de criterios mínimos de racionalidad constitucional<sup>310</sup>.

---

308. Para una ampliación de estos argumentos ver Rodrigo Uprimny Yepes. “*Legitimidad y conveniencia del control constitucional de la economía*” en Germán Burgos (ed.). *Independencia judicial en América Latina. Qué, de quién, cómo.* Bogotá, ILSA, 2003.

309. Es pertinente señalar que si bien nadie cuestiona el rol eminentemente garantista y protector del derecho a la salud que ha tenido la Corte en sus decisiones en sede de revisión de tutela, es posible identificar posiciones mucho más moderadas en la jurisprudencia producida con ocasión de las demandas ciudadanas de inconstitucionalidad contra los contenidos de la Ley 100 de 1993, en las cuales la Corte ha avalado varios contenidos de la ley que podrían resultar algo problemáticos para la realización del derecho. Así por ejemplo se tienen las decisiones de la Corte Constitucional que declararon exequible la existencia de dos regímenes diferenciados para el aseguramiento de la población (Sentencia C-1032 de 2006 M.P., Nilson Pinilla Pinilla), la existencia de los planes complementarios (C-99 de 1998, M.P. Eduardo Cifuentes Muñoz) y que desechó los argumentos que cuestionaron el papel de la intermediación en el régimen subsidiado (C-1489 de 2000, M.P. Alejandro Martínez Caballero).

310. Esto ha sido ampliamente desarrollado por la Corte a partir de la sentencia T-02 de 2004 mediante la cual se declaró el estado de cosas inconstitucional en relación con la atención a la población víctima del desplazamiento forzado, y en los Autos de seguimiento al cumplimiento de dicha sentencia.

En esta línea, se ha cuestionado por parte de la Defensoría del Pueblo el hecho de que, a pesar del elevado número de acciones de tutelas sobre salud, la Corte no haya hecho un pronunciamiento que reconozca la gravedad global de la situación y que obligue a las autoridades a tomar los correctivos pertinentes. En el último informe sobre el tema, publicado en 2007, se señala que el elevado número de tutelas en salud no ha sido considerado por la Corte para declarar el estado de cosas inconstitucional en materia de salud, mientras que en el caso de las vulneraciones de los derechos de la población desplazada “a la Corte le bastaron 128 tutelas para declarar mediante la sentencia T-02 de febrero del 2004 el estado de cosas inconstitucional”<sup>311</sup>. Igualmente, una reflexión sobre la configuración de un estado de cosas inconstitucional derivado de las continuas y sistemáticas violaciones al derecho a la salud y la seguridad social fue planteada en el Segundo Congreso Nacional por el Derecho a la Salud, celebrado en 2004<sup>312</sup>. Si bien ésta no es la única alternativa, en todo caso hay que resaltar que una declaratoria de la Corte Constitucional en este sentido puede ser deseable, para conminar a las autoridades públicas a adoptar correctivos importantes en la política de salud, impulsar la adopción de indicadores para medir el goce efectivo del derecho e involucrar a todo el andamiaje estatal en el compromiso con su plena satisfacción, o lograr que la tutela sea complementada con políticas públicas más equitativas.

Pero aunque no se haya producido aún la declaratoria de “estado de cosas inconstitucional”, la Corte sí ha logrado tener una fuerte incidencia en la política pública de salud, que se expresa principalmente en los cambios normativos que se han producido para adecuar la normatividad a los contenidos de la jurisprudencia. La inclusión en el POS de exámenes, medicamentos y procedimientos que antes eran excluidos, es ejemplo de ello, aunque todavía sea cuestionable si ésta es una buena medida de política pública en tanto no hay estudios epidemiológicos serios que den cuenta de las verdaderas necesidades en esta materia y que sustenten tales decisiones. Por eso el impacto global de la jurisprudencia constitucional sigue siendo reducido, porque a pesar de la adecuación de algunas normas en la perspectiva de garantizar el derecho, los problemas de fondo siguen sin resolverse.

Todo lo anterior permite concluir que la tutela es muy importante, pero es insuficiente para garantizar la plena realización del derecho a la salud, ya que el escenario más apropiado para la realización de los derechos sociales son las políticas públicas sociales, en donde concurren todas las ramas del poder público, y no sólo en los estrados judiciales. Además, es claro que la tutela no agota las necesidades de control y vigilancia propias de un sistema mixto de prestación y por lo mismo es necesario que el control se fortalezca, pues si bien un componente de las políticas públicas es el control judicial, no es ésta la única fuente del mismo. De esta manera es necesario preguntarse si lo que debe reformarse es la tutela, o si también el sistema de inspección, vigilancia y control debe sufrir modificaciones que lo fortalezcan, y si, de otro lado, el sistema de salud en su conjunto

---

311. Defensoría del Pueblo (2007). *La tutela y el derecho a la salud: período 2003-2005*, Bogotá, p. 19. Similar apreciación había hecho este organismo en el informe de los años anteriores.

312. Ver *Mandato Ciudadano por la vida digna, la salud y la seguridad social en Colombia*. Segundo Congreso Nacional por la Salud y la Seguridad Social, en: [[http://asmedasantioquia.org/momento\\_medico/edicion\\_82/mandato\\_ciudadano.html](http://asmedasantioquia.org/momento_medico/edicion_82/mandato_ciudadano.html)].

está siendo un instrumento capaz de responder adecuadamente a los compromisos estatales en la realización del derecho. Vale la pena mirar las respuestas que a estos interrogantes se han planteado más recientemente.

### 5.3. ¿Reformas a la tutela o reformas en el sistema de salud?

La respuesta institucional a la proliferación de acciones de tutela para proteger el derecho a la salud se ha movido básicamente en tres direcciones. Por una parte, se han realizado modificaciones normativas que han pretendido limitar o impedir el empleo de la tutela como mecanismo para la defensa de este derecho; una segunda vía ha buscado, por el contrario, la especialización de la tutela o la creación de una jurisdicción especial que tramite estos asuntos, y otras han estado encaminadas al fortalecimiento de mecanismos de control y vigilancia propios del Sistema General de Seguridad Social en Salud (SGSSS), que desplacen el uso recurrente de la tutela. Nos referiremos a continuación a cada una de estas alternativas.

#### 5.3.1. Las reformas encaminadas a limitar o impedir el empleo de la acción de tutela para la garantía del derecho a la salud

Como resultado de la amplia polémica nacional suscitada por el crecimiento en la utilización de la acción de tutela, por una parte para impugnar decisiones judiciales (tutela contra sentencias) y por otra para exigir la realización de derechos prestacionales con las correspondientes consecuencias económicas de dichos fallos, se han presentado para su discusión en el Congreso de la República varias iniciativas de reforma a la administración de justicia, en las que se han planteado modificaciones al artículo 86 de la Constitución. Tales propuestas han estado enfocadas principalmente a restringir la utilización de la tutela para atacar decisiones judiciales, en especial las proferidas por las altas cortes<sup>313</sup>, pero paralelamente se ha buscado excluir la procedibilidad de la acción de tutela para la defensa de derechos sociales, lo que de suyo incluye el derecho a la salud. De hecho, como es en materia de salud en donde se ha presentado el mayor número de estas acciones, es precisamente la restricción del uso de la tutela para su garantía lo que ha inspirado primordialmente estas iniciativas<sup>314</sup>.

En el proyecto de Acto Legislativo 10 de 2002, de autoría del entonces ministro del Interior y Justicia Fernando Londoño Hoyos, se establecía que la tutela no pudiera presentar-

---

313. Con este fin, en el año 2006 se presentaron varios proyectos para su discusión en el Congreso. El Ministerio del Interior presentó el proyecto de Acto Legislativo número 133 publicado en la *Gaceta del Congreso* No. 412 de 2006, en el cual además se señalaban límites al control de constitucionalidad sobre los actos reformativos de la Constitución y se sancionaba nuevamente el consumo de la dosis personal; el Consejo de Estado coadyuvado por la Corte Suprema de Justicia y por la Fiscalía General de la Nación presentó el Proyecto de Acto Legislativo número 13, publicado en la *Gaceta del Congreso* No. 414 de 2006. También se presentó el proyecto de Acto Legislativo número 10 por parte del senador Germán Vargas Lleras, el representante Roy Barreras y otros, publicado en la *Gaceta del Congreso* No. 466 de 2006. Sobre el debate en relación con la acción de tutela contra sentencias judiciales ver: DeJuSticia (2006). "Tutela contra sentencias. Documento para debate". *Documentos de Discusión* No. 3, Bogotá.

314. No se desconoce en todo caso la polémica que también han suscitado las decisiones de la Corte Constitucional relacionadas con la garantía del derecho a la educación, derechos del trabajo y vivienda, particularmente por los fallos sobre el UPAC.

se ante jueces colegiados, y expresamente se limitaba para la protección de los derechos consagrados en el capítulo I del título II de la Carta, es decir, para los expresamente denominados como derechos fundamentales, lo que excluía a todos los derechos económicos, sociales y culturales, y entre ellos por supuesto el derecho a la salud<sup>31</sup>.

### 5.3.2. *El fortalecimiento de la tutela individual para derechos sociales, la tutela estructural y la creación de una jurisdicción especializada de seguridad social*

Desde la postura contraria a la restricción a la exigibilidad judicial de los derechos sociales, ha habido otras iniciativas que, antes que restringir el acceso a la tutela, han buscado ampliarlo, superando la procedencia supeditada a la conexidad con otros derechos y el alcance individual de las decisiones. Aquí se ubica la propuesta para la expedición de una ley estatutaria de autoría del entonces senador Carlos Gaviria Díaz, que, fundamentada en el artículo 89 de la Constitución, que habilitó al legislador para que además de las acciones constitucionales establecidas creara otros recursos o acciones para “propugnar por la integridad del orden jurídico, y por la protección de sus derechos individuales, de grupo o colectivos, frente a la acción u omisión de las autoridades públicas”, establecía la creación de una acción de tutela social para los derechos a la alimentación, salud, educación, trabajo, seguridad social y vivienda y la protección del derecho al mínimo vital<sup>316</sup>.

El proyecto partía de considerar que la garantía y protección efectiva de los derechos sociales es un deber estatal que ha quedado librado al desempeño de los jueces de tutela, lo que ha generado gran inseguridad jurídica y por ello “se impone como una necesidad prioritaria la regulación por vía de ley estatutaria de la exigibilidad judicial de derechos sociales, de conformidad con la amplia y reiterada jurisprudencia constitucional sobre la materia”<sup>317</sup>.

El capítulo II del proyecto de ley estaba dedicado al derecho a la salud y se adoptaban medidas, como la previsión para que las EPS no pudieran negar nunca una prestación que afectara el núcleo esencial del derecho a la salud, prelación de turnos a favor de los grupos vulnerables en la prevención, diagnóstico y tratamiento de la enfermedad y se establecían multas de entre 0 y 200 salarios mínimos mensuales vigentes para quien re - incidiera en las acciones u omisiones que hubieran dado lugar a un fallo de tutela social.

---

31. El texto del proyecto decía lo siguiente: “Artículo 3°. El artículo 86 de la Constitución quedará así: Artículo 86. Toda persona, natural o jurídica, tendrá acción de tutela para reclamar ante los jueces no colegiados, competentes de acuerdo con la ley, en todo momento y mediante un procedimiento preferente y sumario, por sí misma o por quien actúe en su nombre, la protección inmediata de los derechos fundamentales de que trata el Capítulo I del Título II de la Constitución, cuando quiera que estos resulten vulnerados o amenazados por la acción o la omisión de cualquier autoridad pública [...]”. En la propuesta también se modificaba el contenido actual del artículo en cuanto a la procedencia de la tutela frente a particulares, excluyendo la circunstancia en que el solicitante se hallare en estado de subordinación, con lo cual se reducía su uso en todos los aspectos derivados de relaciones laborales.

316. El mínimo vital es un concepto que ha sido desarrollado por la jurisprudencia de la Corte Constitucional a partir de las obligaciones surgidas de la proclamación del Estado Social de Derecho y se ha sido definido en varios fallos “como aquella porción de ingresos indispensable e insustituible para atender las necesidades básicas y permitir así una subsistencia digna de la persona y de su familia; sin un ingreso adecuado a ese mínimo no es posible asumir los gastos más elementales, como los correspondientes a alimentación, salud, educación o vestuario, en forma tal que su ausencia atenta en forma grave y directa contra la dignidad humana”. Ver sentencia T-1001 de 1999, M.P. José Gregorio Hernández Galindo.

317. Exposición de motivos del Proyecto de Ley Estatutaria 01/0 Senado-209/0 Cámara, por medio del cual se regula la protección judicial de algunos derechos sociales, publicado en la *Gaceta del Congreso* No. 46 de 200.

Esto último resultaba bastante interesante porque precisamente uno de los problemas que se evidencian actualmente, es que se interponen tutelas contra entidades que reiteradamente incurren en las mismas conductas u omisiones violatorias del derecho y sin embargo, no son debidamente sancionadas.

En general, este proyecto intentó conceder estatus legal a varias de las disposiciones de la Corte<sup>318</sup> y avanzar en la exigibilidad judicial de los derechos sociales, como nunca antes se había planteado en el país. Pese a ello, el proyecto no tuvo el respaldo del Gobierno Nacional, que en cabeza del Ministerio de Protección Social afirmó que la iniciativa además de padecer vicios de inconstitucionalidad por aspectos de forma, resultaba inconveniente. En la Comisión de la Cámara de Representantes también se cuestionó duramente la propuesta aduciendo que tenía grandes repercusiones presupuestales y que no se previeron los costos ni las fuentes de ingresos para el financiamiento. Además se sostuvo que algunos de los derechos referidos en el proyecto de ley estatutaria ya contaban con amplios desarrollos legislativos especiales, que en el caso de la salud estaban representados por la Ley 100 de 1993 y demás legislación complementaria. De igual manera se presentó oposición a que el Fosyga asumiera todas las obligaciones del Estado, bajo el argumento de que ya tenía grandes cargas, de las cuales un buen número provenían precisamente de los fallos de tutela. Finalmente se consideró que el trámite debía ser el de una reforma constitucional y no de una Ley Estatutaria por el impacto que tendría para la administración de justicia “convertir de hecho y de derecho, en tutelables, derechos sociales que se tutelan excepcionalmente”<sup>319</sup>.

En este debate se llevó a cabo un estudio que analizó las posibilidades de implementar en Colombia un modelo estructural de realización de derechos sociales, que trataba de responder a las limitaciones de la tutela individualmente considerada. En esta propuesta se desarrolló un esquema de protección y realización judicial de los derechos económicos, sociales y culturales fundado en la concepción de que éstos deben ser realizados en forma primaria por las políticas públicas y que comprometen tanto a la jurisdicción constitucional como a la contencioso administrativa, por ser esta última la encargada de velar por el adecuado funcionamiento de la Administración. El proyecto de ley estatutaria elaborado<sup>320</sup> contemplaba tres acciones judiciales para la realización de los derechos sociales: i) la acción pública de corrección o eliminación de políticas públicas, que procede cuando una política pública viole o incumpla las obligaciones que la realización de los DESC imponga al Estado colombiano según la Constitución Política o los tratados internacionales de derechos humanos y se tramitaría ante la jurisdicción contencioso administrativa; ii) la acción de tutela social estructural, cuya finalidad es que “la Corte

---

318. El artículo 1 del proyecto recogía la jurisprudencia de la Corte en relación con las circunstancias en que el derecho de los usuarios al suministro de medicamentos y tratamientos debe ser garantizado, aun cuando el afectado no hubiera cumplido los períodos mínimos de cotización. Igualmente se establecía que a pesar de no estar al día en el pago de los aportes o de la desvinculación laboral, las EPS no podían suspender el suministro de una medicina o tratamiento necesario para salvaguardar el mínimo vital.

319. En estos términos fue rendido el informe de ponencia negativo para el primer debate del Proyecto de Ley 209 de 200 Cámara-01 de 200 Senado, publicado en la *Gaceta del Congreso* No. 212 de 2006, después del cual se ordenó el archivo del proyecto. La comisión de ponentes estuvo conformada por los representantes Reginaldo E. Montes Alvarez, Telésforo Pedraza Ortega y Jesús Ignacio García, quien actuó como coordinador.

320. Este proyecto fue elaborado por la Universidad de los Andes como parte de una consultoría con el Ministerio del Interior y de Justicia. El equipo investigador tuvo acceso a la propuesta.

Constitucional determine si el diseño, la formulación, la ejecución o la evaluación de las políticas públicas respetan el contenido de las obligaciones del Estado colombiano en la realización de los DESC” y adopte los remedios necesarios para ajustarlas cuando ello no sea así; iii) la acción de tutela social individual prevista, entre otros, para la protección del derecho a la salud cuando

... (1) su vulneración implique la vulneración de un derecho fundamental; (2) el afectado no disponga de otro medio de defensa judicial; (3) existiendo otro medio de defensa judicial, la acción de tutela se utiliza como mecanismo transitorio para evitar un perjuicio irremediable; y, (4) la violación del derecho de que se trate no es producto de deficiencias graves, sistemáticas y estructurales en el diseño, la formulación, la ejecución o la evaluación de la política pública que tenga por finalidad la realización del derecho en cuestión que puedan dar lugar al trámite de una acción de tutela social estructural <sup>321</sup>.

El objetivo fundamental de estas acciones es el ajuste de las políticas a las obligaciones estatales derivadas de la normatividad internacional y de los mandatos constitucionales y, a excepción de la acción para corrección o eliminación de políticas públicas, más que creaciones novedosas intentaron sistematizar la jurisprudencia constitucional en materia de estado de cosas inconstitucional y de procedencia de la tutela para la protección de DESC. En cuanto al derecho a la salud, el proyecto de ley también incorporaba expresamente los componentes del derecho definidos en la normatividad internacional (disponibilidad, accesibilidad, aceptabilidad y calidad), recuperaba los desarrollos hechos por la Corte Constitucional, y trataba de confrontar algunos de los factores que han contribuido a la proliferación de las acciones de tutela, especialmente fortaleciendo la figura de los Comités Técnico Científicos y aclarando las reglas para el recobro ante el Fosyga.

Junto a las iniciativas anteriores, aunque en un sentido distinto guiado por el propósito de especializar el trámite de estos asuntos, se ha propuesto la creación de una jurisdicción especializada de seguridad social, que, entre otros temas, asumiría el conocimiento de todos los reclamos relacionados con el derecho a la salud. De esta manera se salvarían las críticas a la falta de pericia de los jueces y se contribuiría a la descongestión de los despachos judiciales, que también se dedican a otros asuntos<sup>322</sup>.

### 5.3.3. Las reformas legislativas a la normatividad propia del sistema

Por fuera del debate sobre las reformas a la administración de justicia en general y al ejercicio de la acción de tutela para la protección del derecho a la salud, las reformas en la

321. Borrador propuesta Proyecto de Ley Estatutaria No. \_\_ de 2007 “Por medio de la cual se regula la realización y exigibilidad integral de los derechos económicos, sociales y culturales”, artículo 4, inciso 2.

322. En el informe más reciente de la Defensoría del Pueblo se recomienda “exhortar al Estado a crear una justicia especializada en materia de seguridad social, para así mitigar la congestión del sistema judicial por el incremento de la acción de tutela como instrumento de protección de los derechos fundamentales, entre estos la salud por conexidad con la vida y los prestacionales cuando afectan el mínimo vital”. Ver Defensoría del Pueblo (2007). *La tutela y el derecho a la salud: periodo 2003-2005*, Bogotá. p. 82. Una recomendación similar se encuentra en: Aquiles Arrieta (2002). “Comentarios a la creación de jurisprudencia constitucional: el caso del acceso a los servicios de salud” en *Revista Tutela, Acciones Populares y de Cumplimiento*, Bogotá, Legis, p. 1782. El superintendente nacional de Salud, José Renán Trujillo García, también propuso en junio de 2007, al instalar una consulta ciudadana en Montería, la creación de una jurisdicción especializada en seguridad social. Ver *Boletín de la Presidencia de la República* en [http://web.presidencia.gov.co/sne/2007/junio/21/01212007.htm].

legislación especial de salud también se han visto influidas por las situaciones generadas a partir del uso frecuente de la tutela en esta materia. En algunos casos se ha optado por incorporar en la normatividad algunos de los preceptos trazados por la jurisprudencia. Ejemplo de esto fue la expedición de la Ley 972 de 200 , por la cual se adoptan normas para mejorar la atención por parte del Estado colombiano de la población que padece de enfermedades ruinosas o catastróficas, especialmente el VIH-sida, que ha entrado a resolver situaciones que antes eran motivo para instaurar acción de tutela, pues las enfermedades ruinosas o catastróficas no estaban cobijadas por el POS. De allí que las personas no eran atendidas por las EPS e IPS, so pretexto de que no estaban obligadas a hacerlo, lo cual exigía a los usuarios o beneficiarios ejercitar la acción de tutela para exigir el respeto a sus derechos, a pesar de que estas enfermedades “no representan una amenaza para el equilibrio financiero del sistema, toda vez que, para su manejo, las EPS deben reasegurarse con empresas de seguros especializadas en el manejo de este tipo de riesgos”<sup>323</sup>.

Otro camino escogido ha sido el de plantear la creación de mecanismos alternativos a la tutela, que sirvan como canal para viabilizar las reclamaciones relacionadas con la atención en salud o el fortalecimiento de otros ya existentes. En esta línea pueden entenderse las modificaciones introducidas por la Ley 1122/07, que precisamente plantea como uno de sus objetivos la reforma al Sistema de Seguridad Social en Salud en lo relacionado con las funciones de inspección, vigilancia y control (art. 1) y dedica todo un capítulo (el VII) a este tema.

De acuerdo con la nueva norma, las competencias que antes eran asumidas por el Consejo Nacional de Seguridad Social en Salud (CNSS) son trasladadas a la Comisión de Regulación en Salud (CRES), que tendrá, entre otras tareas, la de definir los contenidos de los Planes Obligatorios de Salud que las Entidades Promotoras de Salud (EPS) garantizarán a los afiliados según las normas de los regímenes contributivo y subsidiado. Esta Comisión se encargará además de definir y revisar, como mínimo una vez al año, la lista de medicamentos esenciales y genéricos que harán parte de los Planes de Beneficios. Ésta es una labor que tiene gran incidencia en relación con las acciones de tutela que se interponen para exigir el suministro de medicamentos que no están contenidos en el plan obligatorio, pues si el nuevo ente encargado de la regulación, al definir el POS, incluye elementos que hasta el momento están excluidos y han sido requeridos con frecuencia por los usuarios, es previsible que las tutelas por este concepto se reducirían.

Ahora bien, en cuanto a los eventos que hasta ahora se han solucionado acudiendo a la acción de tutela, pero que no tienen que ver con exclusiones del Plan Obligatorio sino con negación de los contenidos incluidos, la alternativa planteada ha sido la de fortalecer el subsistema de Inspección, Control y Vigilancia, para que internamente el propio sistema pueda responder de mejor manera a los problemas que se presentan. En esta lógica, la Ley 1122/07 otorgó facultades de ente conciliador y jurisdiccionales a la Superintendencia Nacional de Salud, para proteger a los usuarios en varios de los sucesos que hasta el momento se han tramitado en sede de tutela. Así, el artículo 41 de la citada

---

323. Concepto rendido por la decana de la Facultad de Economía de la Universidad Nacional de Colombia en el trámite de la demanda de inconstitucionalidad contra el artículo 169 de la Ley 100/93. Citado en el acápite de pruebas de la sentencia C-99/98, M.P. Eduardo Cifuentes Muñoz.

ley establece que con el fin de garantizar la efectiva prestación del derecho a la salud de los usuarios del Sistema General de Seguridad Social en Salud, la Superintendencia Nacional de Salud podrá conocer y fallar en derecho, con carácter definitivo y con las facultades propias de un juez, en los siguientes asuntos:

- a) Cobertura de los procedimientos, actividades e intervenciones del plan obligatorio de salud cuando su negativa por parte de las entidades promotoras de salud o entidades que se les asimilen, ponga en riesgo o amenace la salud del usuario;
- b) Reconocimiento económico de los gastos en que haya incurrido el afiliado por concepto de atención de urgencias en caso de ser atendido en una IPS, que no tenga contrato con la respectiva EPS, cuando haya sido autorizado expresamente por esta última para una atención específica y en caso de incapacidad, imposibilidad, negativa injustificada o negligencia demostrada de la Entidad Promotora de Salud para cubrir las obligaciones para con sus usuarios;
- c) Conflictos que se susciten en materia de multiafiliación dentro del Sistema General de Seguridad Social en Salud;
- d) Conflictos relacionados con la libre elección que se susciten entre los usuarios y las aseguradoras, y entre estos y las prestadoras de servicios de salud, y conflictos relacionados con la movilidad dentro del Sistema General de Seguridad Social en Salud.

La norma también establece que la actuación de la Superintendencia será siempre a solicitud de parte, y excluye de su conocimiento asuntos que deban someterse al proceso de carácter ejecutivo o acciones de carácter penal. En cuanto al procedimiento, se dispone que será el previsto en el artículo 148 de la Ley 446 de 1998, que fue modificado por el artículo 2 de la Ley 10 de 1999 y, conforme al cual, la Superintendencia debe proferir decisión definitiva en los treinta días hábiles siguientes a la fecha en que se reciba la petición, de manera completa, aunque en todo el trámite del proceso las notificaciones, la práctica de pruebas y los recursos interpuestos interrumpirán el término establecido para decidir en forma definitiva.

El inciso 3 del artículo 148 citado prevé también que los actos que dicten las Superintendencias en uso de sus facultades jurisdiccionales no tendrán acción o recurso alguno ante las autoridades judiciales<sup>324</sup>. Sin embargo, la decisión por la cual las entidades se declaren incompetentes y la del fallo definitivo serán apelables ante las mismas<sup>32</sup>.

En varias oportunidades la Corte Constitucional se ha pronunciado sobre la atribución de funciones jurisdiccionales a las Superintendencias<sup>326</sup> estableciendo que este proceder resulta constitucional siempre que se cumplan tres requisitos:

324. Este inciso fue declarado constitucionalmente exequible en tanto se entienda que no impide el ejercicio de la acción de tutela contra las providencias adoptadas por las superintendencias en ejercicio de funciones jurisdiccionales, ni las acciones contencioso administrativas, en caso de que dichos entes actúen excediendo sus competencias jurisdiccionales. Ver Sentencia C-384 de 2000, M.P. Vladimiro Naranjo Mesa.

32. La expresión “ante las mismas” fue declarada condicionalmente exequible bajo el entendido de que se refiere a las autoridades judiciales en los términos señalados en la parte motiva de la sentencia C-41 de 2002, M.P. Eduardo Montealegre Lynnet.

326. Ver sentencias C-1641 de 2000, M.P. Alejandro Martínez Caballero; C-1143 de 2000, M.P. Carlos Gaviria Díaz; C-649 de 2001, M.P. Eduardo Montealegre Lynnet; y C-1071 de 2002, M.P. Eduardo Montealegre Lynnet, entre otras.

*(i) las materias específicas deben estar precisadas en la ley, (ii) no pueden tener por objeto la instrucción de sumarios o el juzgamiento de delitos y, (iii) al interior de la Superintendencia debe estar estructuralmente diferenciado el ámbito de la función judicial del correspondiente a las funciones administrativas de inspección, vigilancia y control. Por lo tanto, no pueden ser ejercidas ambas funciones por los mismos funcionarios* <sup>327</sup>.

En relación con el ejercicio de estas facultades jurisdiccionales por parte de la Superintendencia Nacional de Salud a partir de la aprobación de la Ley 1122/07, la Corte Constitucional avaló su exequibilidad considerando cumplidos los dos primeros requisitos antes enunciados, por la definición expresa de las funciones que hace la ley y la exclusión de los procesos de carácter ejecutivo y penal. En cuanto al tercer requisito, éste se verificó gracias a la reforma de la estructura de dicha entidad, operada a través del Decreto 1018 de 2007, mediante el cual se creó la Superintendencia Delegada para la Función Jurisdiccional y de Conciliación (artículo 7). No obstante, la Corte declaró la exequibilidad del artículo 41 de la Ley 1122/07 en el entendido de que “ningún funcionario de la Superintendencia Nacional de Salud podrá ejercer funciones jurisdiccionales respecto de casos en los cuales se hubiera pronunciado con anterioridad, en razón de sus funciones administrativas ordinarias de inspección, vigilancia y control”<sup>328</sup>.

Las nuevas competencias atribuidas por la Ley 1122/07 claramente buscan contribuir a la descongestión de los despachos judiciales, al entregar el conocimiento de varios asuntos de frecuente reclamo judicial a la Superintendencia Nacional de Salud, aunque, como se observa, se trata básicamente de problemas de multifiliación o de fallas en el suministro de los contenidos de los planes obligatorios, pero todo el tema de los eventos excluidos está ausente en esta regulación<sup>329</sup>.

Es muy pronto aún para poder evaluar de qué manera esto ha resultado eficaz frente al objetivo previsto, pues la reestructuración al interior de la Superintendencia Nacional de Salud apenas está en curso. Pero por el momento puede decirse que si bien es probable que la tutela disminuya en ciertos asuntos (los que ahora son de conocimiento de la Superintendencia), todos los demás problemas relacionados con el cumplimiento de las entidades frente a la prestación de servicios contenidos en los planes básicos, además de las exclusiones, como permanecen sin un mecanismo de respuesta distinto, continuarán siendo resueltos a través de la tutela.

Por eso, aunque la reforma avanzó en la definición de una instancia para tramitar las reclamaciones, en la línea de fortalecimiento de la función general de Inspección, Vigilan-

---

327. Sentencia C-117 de 2008, M.P. Manuel José Cepeda Espinosa.

328. Sentencia C-117 de 2008, M.P. Manuel José Cepeda Espinosa.

329. También es pertinente anotar que la creación de la figura del Defensor del Usuario se inserta en esta lógica de fortalecimiento de los mecanismos administrativos de IVC, aunque no obstante, éstos siguen siendo completamente independientes de las acciones judiciales. Así lo aclaró la Corte Constitucional al declarar la exequibilidad condicionada del artículo 42 de la Ley 1122/07 “en el entendido de que los usuarios de los servicios de salud podrán formular sus quejas o reclamaciones, relacionadas con la prestación de los mismos, ante la Superintendencia Nacional de Salud, así como también instaurar las acciones judiciales correspondientes, entre ellas la acción de tutela, ante las autoridades competentes, directamente y con independencia de la actuación que adelanten o que puedan adelantar ante el Defensor del Usuario en Salud”. Ver sentencia C-037 de 2008, M.P. Jaime Araújo Rentería.

cia y Control propia del Sistema General de Seguridad Social en Salud, y esto sumado a una mejor orientación de los usuarios puede efectivamente conducir a una disminución de las acciones de tutela en ciertos temas, en realidad resulta insuficiente, porque a lo que se debe apuntar es a eliminar los factores que permiten que persistan las conductas que tan frecuentemente dan origen al desconocimiento de los derechos de los usuarios y motivan sus reclamos, lo que requiere variaciones estructurales en el funcionamiento del Sistema de Salud a partir de la lógica de los derechos humanos y no de la eficiencia económica, que hasta el momento han sido planteadas por los críticos del modelo de la Ley 100 de 1993, pero que no han encontrado eco ni en las instancias gubernamentales, ni en el legislador.



## CONCLUSIONES Y RECOMENDACIONES

Este aparte pretende simplemente sistematizar las conclusiones y recomendaciones que derivan de la investigación adelantada. Con el fin de hacer más pedagógica su presentación, hemos decidido presentarlas en forma de tesis esquemáticas. En ese orden de ideas, la primera sección presenta las conclusiones del estudio, mientras que la segunda sección formula unas recomendaciones básicas que se desprenden de esas mismas conclusiones.

### 1. Conclusiones

Para mayor claridad, hemos ordenado las conclusiones por grandes temas, que corresponden básicamente a los distintos capítulos del informe.

#### **Sobre el marco normativo y el derecho a la salud**

- Conforme a la normatividad internacional, el derecho a la salud es un derecho humano fundamental cuya garantía está a cargo del Estado colombiano en virtud de los compromisos internacionales que éste ha suscrito. Este derecho tiene contenidos (disponibilidad, accesibilidad, aceptabilidad y calidad) que el Estado debe asegurar, lo cual implica para las autoridades una serie de obligaciones de respeto, protección y garantía que deben ser cumplidas.
- La Constitución no sólo incorpora esos estándares internacionales de derechos humanos en virtud del bloque de constitucionalidad sino que, en ciertos aspectos, los profundiza y desarrolla, admitiendo, por ejemplo, la justiciabilidad del derecho a la salud en ciertas condiciones.
- Este marco normativo es imperativo, no sólo frente al derecho constitucional sino frente al derecho internacional, por lo que es necesario examinar las políticas de salud del Estado colombiano en una perspectiva de derechos humanos, con el fin de determinar si las autoridades están o no cumpliendo con sus obligaciones en este campo.
- El anterior marco normativo no impone sin embargo un modelo determinado de sistema de salud, pues las autoridades, y en especial el legislador, gozan, en virtud de los principios democrático y de autodeterminación, de una cier-

ta libertad de configuración para precisar el contenido del derecho a la salud y establecer las políticas y las instituciones que juzguen más apropiadas para satisfacerlo. Esa libertad no es empero absoluta, pues el sistema de salud debe tender a garantizar el goce pleno del derecho a la salud, dentro de los marcos normativos establecidos por la Constitución y por el derecho internacional de los derechos humanos.

- Algunos de los elementos mínimos que debe tener la política de salud del Estado colombiano para ser compatible con ese marco normativo son: (i) que el sistema de salud no se limite a atender la enfermedad sino que también trate los factores subyacentes y determinantes de la salud, (ii) que el diseño y funcionamiento de dicho sistema respete ciertos principios básicos comunes a los derechos humanos, como el deber de transparencia, la participación, la rendición de cuentas y el respeto a las diferencias culturales y a los principios de igualdad y de no discriminación; (iii) que cuente con un sistema de información, de indicadores y metas, en perspectiva de derechos humanos, que permita evaluar con claridad los avances y retrocesos en la satisfacción del derecho a la salud; (iv) que el Estado promueva sistemas de financiación adecuados y equitativos que canalicen los recursos necesarios para lograr una satisfacción progresiva pero cada vez más plena e integral del derecho a la salud; y (v) que la política de salud satisfaga los contenidos básicos directamente exigibles del derecho a la salud.

#### **Sobre la política de salud establecida en la Ley 100 de 1993 y en reformas ulteriores**

- En consecuencia, y en ejercicio de su potestad de definir el sistema más adecuado para la prestación del servicio a la salud, el Estado colombiano adoptó el modelo de “pluralismo estructurado” o de “competencia regulada”, plasmado en la Ley 100 de 1993.
- Ese esquema institucional de satisfacción del derecho a la salud en principio es un desarrollo posible dentro de los marcos normativos del derecho a la salud pero presenta limitaciones, pues consagra inequidades inaceptables (como la distinción entre regímenes contributivo y subsidiado, con prestaciones diversas) y durante mucho tiempo tendió a limitarse en la práctica a ser un mecanismo de protección del riesgo financiero de las familias frente a la enfermedad, lo cual debilitó los deberes del Estado frente a la salud pública y frente a la prevención de las enfermedades.
- Además, después de 1 años de funcionamiento, los resultados de este sistema son por lo menos ambiguos, porque a pesar del considerable aumento del gasto público en salud, el derecho a la salud no está plenamente satisfecho.
- Esa valoración integral del sistema de salud en perspectiva de derechos humanos es empero una tarea compleja, pues nuestro país carece de un verdadero sistema de información y seguimiento de las políticas sociales, basado en indicadores en perspectiva de derechos humanos, lo cual dificulta la transparencia de las políticas y la rendición de cuentas por parte de las autoridades.

- Con todo, es posible establecer que en algunos temas relacionados con el aseguramiento hay incuestionables mejorías. Sin embargo, la universalidad no se ha logrado y subsisten profundas inequidades, en especial por factores de ingreso y situación geográfica, tanto en el acceso a los servicios de salud como en el estado de salud de los colombianos. Fuera de eso, ha habido deterioros y estancamientos graves, por ejemplo en la prevención de enfermedades y en la vacunación.
- Por ello, pese a las innumerables reformas y ajustes que ha sufrido el modelo, éste sigue planteando interrogantes sobre su idoneidad para satisfacer integralmente el derecho a la salud de la población.
- A partir del reconocimiento de la imperfección del mercado de la salud, el modelo de SGSSS implantado por la Ley 100 le otorgó al sistema de inspección, vigilancia y control un papel preponderante para el correcto funcionamiento del sistema en la prestación del servicio público de la salud.

### **Sobre la interpretación del SGSSS a la luz de la teoría de los sistemas**

- Conforme a un enfoque sistémico, el modelo que ha adoptado el Estado colombiano para la prestación del servicio público de salud se caracteriza como un sistema mecánico que busca esencialmente la eficiencia económica y que por ello no está volcado a la satisfacción del derecho. El diseño ideal, lineal, fragmentario, aislado, estático, invariante, asincrónico y centralizado que tienen las partes, los componentes y el subsistema de regulación y control del SGSSS dificulta su adaptación a los cambios, internos y externos, que se han venido presentando durante su funcionamiento. La reducción del SGSSS a una colección simple de partes y relaciones organizadas en torno a la satisfacción del interés económico, financiero y administrativo máximo, resultado de la competencia regulada, condiciona, entre otras, la posibilidad de obtener una atención en salud para los colombianos que sea oportuna, adecuada, universal y de calidad.
- En consecuencia, tanto en su diseño como en la puesta en marcha del modelo de SGSSS, se observan tensiones que afectan la garantía plena del derecho a la salud de los habitantes del territorio nacional:
  - Si bien la concepción de la salud consagrada tanto en la Constitución Política como en los principios de la Ley 100 de 1993 está elaborada en términos de lo que los estándares internacionales de derechos humanos definen como el contenido del derecho a la salud, el modelo de prestación del servicio y el subsistema de IVC se rigen en la práctica por una lógica distinta. Se trata de una lógica de eficiencia económica, financiera y administrativa, asociada a la idea de mercado regulado de la atención a la enfermedad. Esto genera en la práctica y en el goce diario del derecho, enormes dificultades.
  - La Ley 100 restringió el sistema de satisfacción del derecho a la salud, a la gestión del riesgo de las familias de acceso a las soluciones de enfermedades. Esto indica que se dejó de lado la prevención y se centró en indicadores de calidad

enfocados a garantizar el equilibrio financiero y no la salud. La salud, en consecuencia, se redujo al tratamiento de la enfermedad, siendo por lo tanto éste un sistema reactivo.

- El modelo, desde su concepción, excluye a gran parte de la población, pues discrimina a sectores enteros en función del ingreso. Sin embargo, la exclusión, en este caso, no debe ser entendida únicamente desde el punto de vista económico. Por el contrario, el fenómeno de exclusión resulta más complejo, y abarca esferas como la cultural, la social y, en el caso particular colombiano, la geográfica.
- La concepción operativa del modelo no cuenta con un enfoque diferencial, por lo cual son limitados los recursos que el sistema tiene para adoptar acciones tendientes a favorecer a la población particularmente vulnerable, que cuenta con especial protección a la luz de los instrumentos del derecho internacional de los derechos humanos y de la Constitución Política. La existencia del régimen subsidiado, que ha sido importante para limitar las inequidades en el acceso a la salud por razón de la capacidad de pago, no es suficiente para superar las diversas discriminaciones.
- El modelo que adoptó el Estado colombiano para la prestación del servicio de salud carece de un efectivo enfoque diferencial que considere la particularidad de amplios sectores de la población y garantice que las políticas del sector promuevan criterios explícitos para la equidad y la inclusión. Además, no siempre la focalización ha mostrado los mejores resultados en materia de acceso de los más pobres a los servicios sociales.
- Si bien una de las premisas del modelo diseñado para la prestación del servicio de salud en Colombia es la descentralización, la concepción de la política pública no parte del reconocimiento de las profundas diferencias de capacidad institucional que se presentan a lo largo del territorio nacional. Por lo tanto, la puesta en marcha del modelo SGSSS adoptado en Colombia con la Ley 100 no sólo resalta las inequidades que el propio sistema engendra, sino que, de manera adicional, profundiza los desequilibrios basados en la variada capacidad institucional de apropiarse y desempeñar las funciones relacionadas con el sistema y, en especial, en la garantía del derecho a la salud, que se relaciona directamente con las diferencias en los niveles de desarrollo socioeconómico que existen entre los entes territoriales.

### **Sobre el funcionamiento del subsistema de Inspección, Vigilancia y Control (SIVC)**

- La concepción del subsistema de Inspección, Vigilancia y Control, diseñado como la gran promesa y requisito para el correcto funcionamiento de la competencia en el mercado regulado de la salud, difícilmente puede sustraerse de la lógica mecánica global del SGSSS de búsqueda de equilibrios financieros, puesto que el SIVC es un subsistema del SGSSS. En consecuencia, los dispositivos y mecanismos de inspección, vigilancia y control del SGSSS están dirigidos a recopilar y procesar la información necesaria para conservar el equilibrio financiero del sistema.

- A pesar del esfuerzo de fortalecer el subsistema y de los ajustes que se le han hecho, las labores de inspección, vigilancia y control siguen siendo fragmentadas, desarticuladas y dispersas, por lo que aun en su propia lógica económica el sistema tiene serias limitaciones prácticas.
- La dispersión en las actuaciones dentro del Subsistema de IVC se debe, entre otras razones, a la falta de claridad por parte de sus agentes de las funciones que les son propias. La dispersión de las actuaciones, responsabilidades, trámites y procesos, y la ausencia de una retroalimentación y coordinación intra e interinstitucional siguen caracterizando el modelo de inspección y vigilancia mecánico que ha procurado el SGSSS, así como la actuación de los agentes externos de vigilancia y control.
- Dado que el subsistema de IVC ha sido diseñado bajo los mismos preceptos del SGSSS, su funcionamiento no permite que las partes articulen sus actividades de control, y se presenta en consecuencia un alto nivel de dispersión y fragmentación de las actividades. Además, dado el papel que desempeña (o se espera que desempeñe) el subsistema de IVC, las limitaciones en su funcionamiento afectan la satisfacción y/o corrección de las barreras que la población encuentre para el goce pleno del derecho.
- Las limitaciones de un modelo mecánico de salud y de su subsistema IVC se traducen en la práctica en una marcada desarticulación interna y externa de las labores de inspección, vigilancia y control. La desarticulación interna, caracterizada por la fragilidad institucional respecto a los procedimientos de atención y trámite de quejas, no sólo afecta en este sentido el goce del derecho a la salud de los usuarios del sistema, en la medida en que funciona en muchos casos a través de canales informales de solución de las peticiones. El modelo elegido para el diseño del subsistema de IVC también imposibilita el uso de las quejas como insumo de reformas tendientes a corregir las barreras que el modelo genera, con lo cual se profundiza la desarticulación externa, es decir, la existente entre el subsistema y el modelo general de prestación de servicios de salud.
- Por otro lado, las instituciones que ejercen control desde otros ámbitos, como las que conforman el Ministerio Público, reproducen parcialmente las limitaciones que se presentan en el ejercicio de control interno del SGSSS. En este sentido, se hace evidente la marcada informalidad en la solución de quejas en el nivel regional, deficiencias en la sistematización y registro de las actuaciones relacionadas y desarticulación no sólo con las entidades que desempeñan actividades de control dentro del SGSSS sino con el nivel central que le es propio a sus estructuras. Esta informalidad supedita la actuación al nivel de conocimiento y disposición de los funcionarios de dar trámite a las quejas y dificulta una labor de evaluación de las mismas.
- Las limitaciones del SIVC no se limitan empero a sus problemas de desarticulación y dispersión, por importantes que ellos sean. Existen tensiones de concepción. La ruptura entre la comprensión de la salud a partir de los principios constitucionales y el tipo de modelo elegido para la prestación del servicio, in-

duce la instauración de un subsistema de IVC cuyos esfuerzos, aunque débiles, insatisfactorios y fragmentados en la práctica, están enfocados a la generación y aplicación de unos indicadores que tienden a vigilar lo que tiene que ver con la eficiencia del sistema. Esto se debe a que se parte de la premisa errada de que la eficiencia económica garantiza el derecho y la calidad del servicio. La delimitación económica, financiera y administrativa del subsistema de IVC impide que se hagan los correctivos necesarios y a tiempo, cuando se presentan problemáticas relacionadas con la atención en salud. Estos conflictos han tenido que resolverse en instancias externas al SGSSS, a través de la vía administrativa o la jurisdiccional a las que acuden los usuarios insatisfechos.

- Las limitaciones en la concepción y funcionamiento del subsistema de IVC y del control ejercido por las entidades del Ministerio Público generan efectos perversos. Por un lado, y teniendo en cuenta que las quejas son la manifestación de la insatisfacción de los usuarios frente a las barreras que el sistema impone para acceder a él o al goce efectivo del derecho, con estándares de calidad adecuados, la ausencia de un sistema que permita gestionar y manejar esas quejas de manera adecuada desdibuja el poder que éstas tienen en tanto insumo de reformas. Así, la resolución de quejas, cuando esto se logra, soluciona situaciones individuales sin convertirse al mismo tiempo en el indicador, o alarma, que el propio sistema pueda detectar y capitalizar, para diseñar correctivos que efectivamente permitan que el sistema garantice el derecho y preste el servicio adecuado según los estándares definidos al efecto. Entonces, la queja no es actualmente insumo ni permite, salvo contadas excepciones, la retroalimentación de la política pública.
- Al mismo tiempo, el impacto que tiene la solución de la queja respecto al contenido del derecho es limitado. La solución está sujeta a variables tanto de carácter institucional (capacidades institucionales, individuales y de organización interna para el trámite de quejas) como a las restricciones que la regulación del SGSSS establece al contenido del derecho y al funcionamiento del sistema.
- El subsistema IVC, concebido para el control del equilibrio financiero, resulta no sólo débil, fragmentado y desinstitucionalizado en la práctica, sino que además está seriamente limitado debido a que su enfoque de diseño carece de una perspectiva de derechos humanos, que no se dirija exclusivamente a la garantía de la calidad del servicio público prestado sino que contribuya a la satisfacción del derecho en los términos que los estándares internacionales le imponen al Estado colombiano como obligación.
- El Estado, de conformidad con lo consagrado en la Constitución Política respecto a las obligaciones de vigilancia y control de servicios públicos, ha reconocido algunos de los problemas presentados en el cumplimiento de estas obligaciones y por ello ha emprendido una reforma del subsistema de IVC, cuyos efectos podrían llegar a ser positivos. Sin embargo, en tanto el patrón de organización (sentido) que orienta el sistema siga siendo el mismo, no hay garantía de que la efectividad en términos de la satisfacción del derecho sea un logro definitivo, puesto que el subsistema sigue siendo concebido para vigilar la prestación del servicio público y no de la garantía del derecho.

### **Sobre la acción de tutela frente al derecho a la salud**

- Las anteriores limitaciones del sistema de salud y del subsistema de IVC para la satisfacción del derecho a la salud explican por qué las personas buscan alternativas para la realización del derecho. El mecanismo privilegiado ha sido la acción de tutela, que se ha convertido en una forma alternativa de acceder al derecho a la salud, en un mecanismo judicial de control de las inequidades e ineficiencias del sistema y en una especie de válvula de escape que ha limitado las tensiones sobre el sistema de salud.
- La capacidad de la tutela como mecanismo para la satisfacción del derecho a la salud de personas determinadas es muy importante, porque ha permitido que en muchos casos el derecho se haya realizado, con lo cual se han salvado muchas vidas. En ese sentido, la tutela en salud debe ser protegida frente a propuestas que pretenden eliminarla.
- Sin embargo, el uso de la tutela, sobre todo en casos individuales, también tiene problemas, pues como se demostró, esta acción judicial, por sí sola, no corrige las inequidades y distorsiones del sistema. Es más, en cierta medida la tutela puede incluso llegar a profundizar ciertas inequidades, en especial en materia de acceso a las prestaciones médicas, pues las personas que más frecuentemente recurren a este mecanismo de protección son quienes ya gozan de un cierto acceso a la salud y de una mayor capacidad económica, como son aquellas que hacen parte del régimen contributivo.
- El Estado ha adoptado algunas medidas para tratar de responder a varios de los problemas derivados del uso frecuente de la acción de tutela para el reclamo del derecho a la salud. Una de ellas fue el otorgamiento de facultades jurisdiccionales y de conciliador a la Superintendencia Nacional de Salud, cuya puesta en marcha genera grandes expectativas y deberá, luego de algún tiempo de su implementación, ser objeto de una profunda evaluación. El funcionamiento en la práctica de los Comités Técnicos Científicos también merece ser objeto de una profunda evaluación.
- Adicionalmente es necesario pensar en otras medidas e instrumentos de política pública para la satisfacción del derecho a la salud y para la corrección de las limitaciones e inequidades del sistema de salud. Hay que pensar igualmente en el diseño de formas de tutela “estructural” a fin de evitar las posibles inequidades que genera el uso de este instrumento de protección en casos individuales, cuando las violaciones aparecen reiteradas y sistemáticas. En esa línea, los debates generados en el seno del Congreso en relación con figuras como la tutela social, la tutela estructural y otras similares deberían ser retomados, precisamente como parte de la discusión sobre cómo mejorar también la garantía del derecho a un recurso judicial efectivo de los habitantes del territorio frente a las decisiones de las autoridades públicas y a las actuaciones y omisiones de los particulares que vulneran el derecho a la salud, y por supuesto también otros derechos sociales.

## 2. Recomendaciones

A partir de las anteriores conclusiones, el equipo investigador considera válido hacer las siguientes recomendaciones:

- Convendría pensar en promover que la Corte Constitucional, en alguna de las innumerables tutelas en salud, declare un “estado de cosas inconstitucional” en materia de salud. Esta declaratoria se justifica no sólo por los graves problemas en términos de acceso, inequidad y calidad, que sigue presentando el sistema, sino además por las limitaciones que tiene la tutela individual para enfrentar esos problemas, que son reiterados y masivos. Esa declaratoria es aún más urgente si se toman en consideración las propias inequidades que podría estar generando el uso mismo de la tutela para la protección del derecho a la salud en casos individuales. La Procuraduría, en asocio con la Defensoría del Pueblo, debería promover esa declaratoria.
- Directamente ligada a una posible declaratoria de estado de cosas inconstitucional en salud, conviene revivir la idea de tramitar leyes estatutarias en derechos sociales, como el derecho a la salud, que sistematicen las reglas jurisprudenciales desarrolladas por la Corte Constitucional, con el fin de evitar tutelas reiteradas en estos campos. La elaboración de esas leyes estatutarias sería además un espacio privilegiado para una suerte de diálogo constitucional entre el juez constitucional, el Congreso, el Gobierno y la opinión pública acerca del alcance que debe tener el derecho a la salud en Colombia.
- Esta necesidad de declarar el estado de cosas inconstitucional en este tipo de casos muestra que, como lo han sugerido algunas propuestas, frente a violaciones masivas y reiteradas a un derecho social, el ordenamiento debería prever formas de tutela “estructural” que permitan a los jueces enfrentar en mejor forma los problemas generados por el SGSSS.
- Por las mismas razones, la Procuraduría debería hacer un llamado a repensar el sistema de salud a la luz de los estándares de derechos humanos. No se trata de señalar que el sistema de “pluralismo estructurado” sea en sí mismo incompatible con los estándares de derechos humanos. Tampoco se trata obligatoriamente de retornar a un sistema exclusivo de subsidios a la oferta pues en este campo son posibles esquemas muy diversos. Pero los resultados del actual sistema –aún muy limitados a pesar del aumento de recursos– así como sus propias distorsiones (por ejemplo frente a la salud pública y la prevención), o los problemas de inequidad y acceso que subsisten, justifican un debate nacional amplio sobre el tema. Este debate debe estar orientado por los contenidos del derecho a la salud y por las obligaciones del Estado colombiano frente a ese derecho.
- En esa dirección, al menos debería pensarse en la adopción de un sistema de indicadores fundado en el derecho a la salud, para el seguimiento de la política de salud en sus diversos componentes y que permita una más clara rendición de cuentas de las autoridades en este campo.

- De manera más restringida, y frente al subsistema de IVC, es necesario superar su desarticulación y fragmentación, para que dicho sistema no sólo solucione casos individuales, lo cual obviamente es importante, sino para que además alimente las políticas públicas en este campo.
- Pero la superación de la desarticulación y la fragmentación no es suficiente. Es necesario precisar, o incluso reformular, los propósitos del subsistema de IVC, para que no sólo se centre en los problemas administrativos y financieros del sistema de salud sino también, y esencialmente, en la garantía del derecho a la salud.
- Por lo mismo, en relación con el ejercicio de la acción de tutela en salud, vale la pena resaltar que la definición de unos planes básicos obligatorios no ha sido suficiente para evitar el desconocimiento reiterado del derecho. Esto representa una situación de grave incumplimiento de obligaciones claramente definidas y exigibles, por lo cual, frente a estas circunstancias, las sanciones deberían ser ejemplares, no sólo porque el ordenamiento jurídico sanciona el incumplimiento contractual, sino porque además todas las violaciones a los derechos humanos tienen que ser debidamente investigadas y sancionadas, lo que comporta también las garantías de no repetición de la conducta violatoria. Por eso parece necesario fortalecer la capacidad sancionatoria de los entes de control frente a las entidades del sistema, no sólo por los problemas derivados de la destinación de los recursos, sino por cualquier conducta que desconozca, afecte o amenace el derecho. Una buena capacitación en este sentido, tanto de los funcionarios encargados de las funciones de IVC, como incluso de los jueces que conocen de este tipo de reclamaciones, resulta sin duda un elemento complementario de gran importancia en la línea señalada.



## BIBLIOGRAFÍA

### 1. LIBROS Y ARTÍCULOS

Víctor Abramovich (2007). “Los estándares interamericanos de derechos humanos como marco para la formulación y el control de las políticas sociales” en Víctor Abramovich, Alberto Bovino y Christian Courtis. *La aplicación de los tratados de derechos humanos en el ámbito local. La experiencia de una década*, CELS, Buenos Aires.

Victor Abramovich y Christian Courtis (2002). *Los derechos sociales como derechos exigibles*, Trotta, Madrid.

Olga Lucía Acosta y otros (2007). “Equidad en el financiamiento del SGSSS” en VV. AA. *Avances y desafíos de la equidad en el sistema de salud colombiano*, DNP, Fundación Corona, Universidad de los Andes y Universidad del Rosario, Bogotá.

Fernando Aguilar (1991). *Interés individual y acción colectiva*, Pablo Iglesias, Madrid.

Mario Hernández Álvarez (1999). “El derecho a la salud en Colombia: obstáculos estructurales para su realización” en *La salud está grave: una visión desde los derechos humanos*, Plataforma Colombiana de Derechos Humanos, Democracia y Desarrollo, Bogotá.

Mario Hernández Álvarez (2002). “El debate sobre la Ley 100 de 1993: antes, durante y después” en Saúl Franco (ed.). *La salud pública hoy: enfoques y dilemas contemporáneos en salud pública*, Universidad Nacional, Bogotá.

Mónica Arbeláez Rudas (2006). *Derecho a la salud en Colombia. El acceso a los servicios del sistema general de seguridad social en salud*, CINEP, Colciencias, Bogotá.

Robert Aunger (2002). *El meme eléctrico*, Paidós, Barcelona.

John L. Austin (1990). *Cómo hacer cosas con palabras*, Paidós, Barcelona.

Francisco Azuero (2006). “La tutela y la provisión de la salud en Colombia. Una explicación institucional” en *Galeras de Administración*, No. 9, noviembre, Universidad de los Andes, Facultad de Administración, Bogotá.

Zygmunt Bauman (2002). *En busca de la política*, Fondo de Cultura Económica, México.

Bitrán & Asociados, Econometría y Esap (2002). *Evaluación y reestructuración de los procesos, estrategias y organismos públicos y privados encargados de la afiliación, pago y recaudo de aportes al sistema*.

Mary Jazmín Campos y otros (2002). "Salud para todos" en Luis Jorge Garay (dir.). *Colombia, entre la exclusión y el desarrollo. Propuestas para la transición al Estado social de Derecho*. Contraloría General de la República en coedición con Alfaomega, Bogotá.

Fritjof Capra (1998). *La trama de la vida*, Anagrama, Barcelona.

Elina Dabas y Denise Najmannovich (199). *Redes, el lenguaje de los vínculos*, Paidós, Buenos Aires.

Defensoría del Pueblo (2006). *Manual de Procesos y Procedimientos para la Atención y Trámite de Peticiones*. Dirección Nacional de Atención y Trámite de Quejas, Bogotá.

Defensoría del Pueblo (2003). *La tutela y el derecho a la salud: causas de la tutela en salud*, Bogotá.

Defensoría del Pueblo (200). *Evaluación de los servicios de salud que brindan las empresas promotoras de salud - 2005*, Bogotá.

Defensoría del Pueblo (2006). *Sistema de seguimiento y evaluación de la política pública de salud a la luz del derecho a la salud*, Bogotá.

Defensoría del Pueblo (2007). *La tutela y el derecho a la salud: período 2003-2005*, Bogotá.

DeJuSticia (2006). "Tutela contra sentencias. Documento para debate" en *Documentos de Discusión*. No. 3, Bogotá.

Daniel C. Dennett (1992). *La libertad de acción*, Gedisa, Barcelona.

David Deutsch (1999). *La estructura de la realidad*, Gedisa, Barcelona.

Asbjørn Eide (199). "Economic, Social and Cultural Rights as Human Rights", en Asbjørn Eide, Catarina Krause y Allan Rosas (eds.). *Economic, Social and Cultural Rights*, Martinus Nijhoff Publishers, Dordrecht-Boston-Londres.

Fernando Filgueira, Carlos Gerardo Molina, Jorge Papadópulos y Federico Tobar. "Universalismo básico: Una alternativa posible y necesaria para mejorar las condiciones de vida" en Carlos Gerardo Molina (ed.) (2006). *Universalismo básico: una nueva política social para América Latina*, BID, Planeta, Washington DC.

Carmen Elisa Flórez y Victoria Eugenia Soto (2007). "Evolución de la equidad en el acceso a los servicios y estado de salud de la población colombiana 1990-200" en VV. AA. *Avances y desafíos de la equidad en el sistema de salud colombiano*. DNP, Fundación Corona, Universidad de los Andes y Universidad del Rosario, Bogotá.

Luis Jorge Garay (2002). *Colombia, entre la exclusión y el desarrollo Propuestas para la transición al Estado social de Derecho*. Contraloría General de la República en coedición con Alfaomega, Bogotá.

Luis Jorge Garay, Adriana Rodríguez (dirs.) (200). *Colombia, diálogo pendiente*, Planeta Paz, Bogotá.

Rolando García (2006). *Sistemas complejos*, Barcelona.

Mauricio García Villegas, César A. Rodríguez Garavito y Rodrigo Uprimny (2006). *¿Justicia para todos? Sistema judicial, derechos sociales y democracia en Colombia*, Editorial Norma, Bogotá.

Mauricio García Villegas y María Paula Saffon Sanín (2007). "Is there hope in judicial activism on social rights? Assessing the dimension of judicial activism on social rights in Colombia", Mimeo, DeJuSticia, Bogotá.

David Gauthier (1994). *La moral por acuerdo*, Gedisa, Barcelona.

Jorge Iván González (2002). "Salud y seguridad social: entre la solidaridad y la equidad" en *Espacio Abierto*, No. 2.

V. Herrera y A.E. Cortés (2000). *Análisis de la descentralización de la política social y la municipalización del sistema general de seguridad social en salud en municipios de categorías 4, 5 y 6*. ESAP-CIMAP, Bogotá.

John H. Holland (2004). *El orden oculto*, Fondo de Cultura Económica, México.

Iván Jaramillo (1999). *El futuro de la salud en Colombia. Ley 100 de 1993: cinco años después*, Fescol, Bogotá.

Steven Johnson (2003). *Sistemas emergentes*, Fondo de Cultura Económica, México.

Stuart Kauffman (2003). *Investigaciones*, Tusquets, Barcelona.

Paul R. Krugman (1996). *La organización espontánea de la economía*, Barcelona.

Juan Luis Londoño y Julio Frenk (1997). *Pluralismo estructurado: hacia un modelo innovador para la reforma de los sistemas de salud en América Latina*, Documento de Trabajo, BID, Washington.

Benoit Mandelbrot y Richard L. Hudson (2006). *Fractales y finanzas*, Tusquets, Barcelona.

Laszlo Mero (2001). *Los azares de la razón*, Paidós, Barcelona.

Ministerio de Relaciones Exteriores (2008). *V Informe de la República de Colombia al Comité de Derechos Económicos, Sociales y Culturales de Naciones Unidas*.

Carlos G. Molina *et al.* (1993). *Gasto público y distribución de subsidios en Colombia*, Fedesarrollo, DNP, Bogotá.

Davis Morton (1998). *Introducción a la teoría de juegos*, Alianza, Madrid.

Elinor Ostrom (2000). *El gobierno de los bienes comunes*, Fondo de Cultura Económica, México.

Organización Iberoamericana de Seguridad Social – CES (2000). *Trascendencia e impacto socioeconómico de la acción de tutela en el sistema de seguridad social colombiano. Informe final primera etapa: Estudio exploratorio*, Bogotá.

Natalia Paredes Hernández (1999). “A cinco años de la reforma del sistema colombiano ¿qué ha pasado con el derecho a la salud?” en *La salud está grave: una visión desde los derechos humanos*. Plataforma Colombiana de Derechos Humanos, Democracia y Desarrollo, Bogotá.

Óscar Parra (2003). *El derecho a la salud en la Constitución, la jurisprudencia y los instrumentos internacionales*, Defensoría del Pueblo, Bogotá.

PARS, CID (2001). *Identificación y afiliación de beneficiarios*, Bogotá.

Luis Eduardo Pérez, César Rodríguez, Rodrigo Uprimny (2007). *Los derechos sociales en serio. Hacia un diálogo entre derechos y políticas públicas*, DeJuSticia, IDEP, Bogotá.

Beatriz Plaza, Ana Beatriz Barona (1999). *Afiliación de población pobre al sistema de salud: el caso colombiano*, Fedesarrollo, Bogotá.

Ilya Prigogine (1997). *Tan sólo una ilusión*, Tusquets, Barcelona.

Mauricio Restrepo (1997). *La reforma a la seguridad social en salud de Colombia y la teoría de la competencia regulada*, Naciones Unidas, CEPAL, GTZ, Santiago de Chile.

Darío Indalecio Restrepo, Raúl Ernesto Cárdenas (2008). “Entre la indiferencia y la informalidad: evaluación del sistema de inspección, vigilancia y control” en Óscar Rodríguez (dir.) (2007). *¿Ha mejorado el acceso en salud? Evaluación de los procesos del régimen subsidiado*, Ministerio de la Protección Social - Programa de Apoyo a la Reforma de Salud (PARS), Centro de Investigaciones para el Desarrollo (CID)-Universidad Nacional de Colombia, Bogotá.

Óscar Rodríguez (2002). *Los avatares del servicio de salud para pobres*. Centro de Investigaciones para el Desarrollo, Universidad Nacional de Colombia, Programa de Apoyo a la Reforma en Salud Tomo II, Bogotá.

Óscar Rodríguez (dir.) (2007). *¿Ha mejorado el acceso en salud? Evaluación de los procesos del régimen subsidiado*, Ministerio de la Protección Social - Programa de Apoyo a la Reforma en Salud (PARS), Centro de Investigaciones para el Desarrollo (CID)- Universidad Nacional de Colombia, Bogotá.

Adolfo Rodríguez Herrera (2007). "Sistema de salud y cohesión social. El acceso universal a los servicios de salud en Costa Rica" en Ana Sojo y Andras Uthoff (eds.) *Cohesión social en América Latina y el Caribe: una revisión perentoria de algunas de sus dimensiones*, CEPAL, Santiago de Chile.

John R. Searle (1990). *Actos de habla*, Cátedra, Madrid.

John R. Searle (1997). *La construcción de la realidad social*, Paidós, Barcelona.

Henry Shue (1984). "The interdependence of duties" en Philip Alston and Katarina Tomasevski (eds.). *The Right to Food*, Martinus Nijhoff, Dordrecht.

Rachel Sieder, Line Schjolden y Alan Angell (eds.) (200). *The Judicialisation of Politics in Latin America*, Palgrave Macmillan, Nueva York.

Herbert A. Simon (1989). *Naturaleza y límites de la razón humana*, Fondo de Cultura Económica, México.

Herman Smith (1991). *Strategies of Social Research*, Holth, Rinewarth and Winston Inc., Fort Worth.

Daniel Titelman, Andras Uthoff y Luis Felipe Jiménez (2000). "Hacia una nueva seguridad social en el siglo XXI: sin solidaridad en el financiamiento no habrá universalidad" en *Revista Panamericana de Salud Pública* Vol. 8, Nos. 1-2.

Daniel Titelman (2003). "El papel del aseguramiento en la protección social" en *Revista de la CEPAL*.

José Renán Trujillo García (2007). *Informe Primer Año de Gestión. Septiembre 2006 - Agosto 2007*, Supersalud, Bogotá.

Universidad de los Andes(2007). "Propuesta Proyecto de Ley Estatutaria No. \_\_ de 2007 "Por medio de la cual se regula la realización y exigibilidad integral de los derechos económicos, sociales y culturales". Documento realizado en el marco de una consultoría con el Ministerio de Hacienda.

Rodrigo Uprimny (2002). "El bloque de constitucionalidad en Colombia. Un análisis jurisprudencial y un ensayo de sistematización doctrinal" en *Compilación de jurisprudencia y doctrina nacional e internacional: derechos humanos y derecho internacional humanitario*. Oficina en Colombia del Alto Comisionado de las Naciones Unidas para los Derechos Humanos, Vol. I, Bogotá.

Rodrigo Uprimny Yepes (2002). "El derecho a la salud en la jurisprudencia constitucional colombiana" en Saúl Franco (ed.). *La salud pública hoy. Enfoques y dilemas contemporáneos en salud pública*, Universidad Nacional de Colombia, Bogotá.

Rodrigo Uprimny Yepes (2003). "Legitimidad y conveniencia del control constitucional de la economía" en Germán Burgos (ed.). *Independencia judicial en América Latina. Qué, de quién, cómo*, ILSA, Bogotá.

Rodrigo Uprimny (2006). *Bloque de constitucionalidad, derechos humanos y proceso penal*, Consejo Superior de la Judicatura, Universidad Nacional, Bogotá.

Heinz von Forester (1996). *Las semillas de la cibernética*, Gedisa, Barcelona.

Duncan J. Watts (2003). *Seis grados de separación*, Paidós, Barcelona.

John Williamson "Our Agenda and the Washington Consensus" en Pedro Pablo Kuczynski y John Williamson (eds.) (2003). *After the Washington Consensus. Restarting Growth and Reform in Latin America*, Washington, Institute for International Economics.

John Williamson (eds.) (2003). *After the Washington Consensus. Restarting Growth and Reform in Latin America*, Institute for International Economics, Washington.

## 2. TEXTOS Y SITIOS ELECTRÓNICOS

Boletín de la Presidencia de la República:

<http://web.presidencia.gov.co/sne/2007/junio/21/01212007.htm>

Boletín 08 de 2008. Procuraduría General de la Nación

[http://www.procuraduria.gov.co/html/noticias\\_2008/noticias\\_08.html](http://www.procuraduria.gov.co/html/noticias_2008/noticias_08.html)

Boletín 08 de 2008. Procuraduría General de la Nación

[http://www.procuraduria.gov.co/html/noticias\\_2008/noticias\\_083.html](http://www.procuraduria.gov.co/html/noticias_2008/noticias_083.html)

Defensoría del Pueblo, Información Institucional en:

[http://www.defensoria.org.co/red/?\\_item=0603&\\_secc=06&ts=1](http://www.defensoria.org.co/red/?_item=0603&_secc=06&ts=1).

Mandato ciudadano por la vida digna, la salud y la Seguridad Social en Colombia. Segundo Congreso Nacional por la Salud y la Seguridad Social. Documento consultado en la página electrónica:

[http://asmedasantioquia.org/momento\\_medico/edicion\\_82/mandato\\_ciudadano.htm](http://asmedasantioquia.org/momento_medico/edicion_82/mandato_ciudadano.htm)

Ministerio de Protección Social – Programa de Apoyo a la Reforma de Salud. "Proyecto de Evaluación y Reestructuración de los Procesos, estrategias, y organismos públicos y privados encargados de adelantar las funciones de inspección, vigilancia y control" p. 470. Documento consultado en la página electrónica:

<http://www.minproteccionsocial.gov.co/pars/library/documents/DocNews-No16194DocumentNo4266.PDF>

Ministerio de la Protección Social - Programa de Apoyo a la Reforma de Salud, Universidad Nacional. *Régimen Subsidiado*. Volumen V. Vigilancia y Control. Documento consultado en la página electrónica:

<http://www.minproteccionsocial.gov.co/pars/library/documents/DocNews-No16197DocumentNo4277.PDF>

Ministerio de Protección Social - Programa de Apoyo a la Reforma de Salud. "Proyecto evaluación y reestructuración de los procesos, estrategias y organismos públicos y privados encargados de adelantar las funciones de vigilancia y control del Sistema de Salud". Capítulo 3. Documento consultado en la página electrónica:

<http://www.minproteccionsocial.gov.co/pars/library/documents/DocNews-No16194DocumentNo4268.PDF>

Ministerio de Salud Dirección de Aseguramiento (2001). "Evaluación del equilibrio financiero del SGSSS: causas y propuestas de solución". Documento consultado en la página electrónica:

<http://www.saludcolombia.com/actual/salud62/colabora.htm>

Alba Lucía Vélez (2000). "La acción de tutela: ¿un mecanismo de protección del derecho a la salud y un proceso alternativo para acceder a servicios de salud?" en *Revista Colombiana Médica*, Vol. 36, No. 3. Ver:

<http://colombiamedica.univalle.edu.co/Vol36No3/cm36n3a10.htm>

### 3. ARTÍCULOS DE REVISTAS

Aquiles Arrieta (2002). "Comentarios a la creación de jurisprudencia constitucional: el caso del acceso a los servicios de salud" en *Revista Tutela, Acciones Populares y de Cumplimiento*, Legis, Bogotá.

Ana María Beltrán (2004). "El derecho a la salud en la jurisprudencia de la Corte Constitucional: ¿un problema en la definición de las políticas públicas o en la interpretación de un sistema de aseguramiento? Análisis a propósito de la sentencia T-603 de 2004" en *Revista Tutela, Acciones Populares y de Cumplimiento*, Vol. 7, Legis, Bogotá.

Jazmín Campos, Martha Rivera y Martha Yanira Castañeda (2004). "El malestar de la salud en Colombia" en *Economía Colombiana*, No. 303.

Óscar Fresneda Bautista (2003). "La Focalización en el Régimen Subsidiado de Salud: Elementos para un Balance" en *Revista Salud Pública*, Diciembre, Vol. No. 3; pp. 209 a 24.

Óscar Parra Vera (2004). "El derecho a la salud: apuntes a la reforma de la acción de tutela respecto al derecho a la salud" en *Revista Economía Colombiana*, edición 303, Contraloría General de la República, pp. 71 a 83.

Diana Pinto Masis y María Isabel Castellanos (2004). "Caracterización de los recobros por tutela y medicamentos no incluidos en los planes obligatorios de salud" en *Revista Gerencia y Políticas de Salud*, Vol. 3 No. 7, Pontificia Universidad Javeriana, Bogotá.

Michael E. Porter y Elizabeth Olmsted Teisberg (2004). "Redefiniendo la competencia en el sector salud" en *Harvard Business Review*, Vol. 82, N°. 6, pp. 6 a 69.

Jairo Humberto Restrepo Zea y Sandra Rodríguez Acosta (200) . “Diseño y experiencia de la regulación en la salud en Colombia” en *Revista de Economía Institucional*. Universidad Externado de Colombia, Volumen 7, Número 12, Primer Semestre.

Rodrigo Uprimny (2007). “La judicialización de la política: casos, potencialidades y riesgos” en *Revista Sur*, No. 6.

#### 4. NORMATIVIDAD NACIONAL

Constitución Política de Colombia

##### *Leyes, decretos, acuerdos y resoluciones*

Ley 24 de 1992. *Por la cual se establecen la organización y funcionamiento de la Defensoría del Pueblo y se dictan disposiciones en desarrollo del artículo 283 de la Constitución Política de Colombia.*

Ley 30 de 1992. *Por la cual se organiza el servicio público de la Educación Superior.*

Ley 60 de 1993. *Por la cual se dictan normas orgánicas sobre la distribución de competencias de conformidad con los artículos 151 y 288 de la Constitución Política y se distribuyen recursos según los artículos 356 y 357 de la Constitución Política y se dictan otras disposiciones.*

Ley 100 de 1993. *Por la cual se crea el sistema de seguridad social integral y se dictan otras disposiciones.*

Ley 71 de 2001. *Por la cual se dictan normas orgánicas en materia de recursos y competencias de conformidad con los artículos 151, 288, 356, 357 (Acto Legislativo 01 de 2001) de la Constitución Política y se dictan otras disposiciones para organizar la prestación de los servicios de educación y salud, entre otros.*

Ley 734 de 2002. *Código Único Disciplinario.*

Ley 73 de 2002. *Por la cual se declaran monumentos nacionales, el Hospital San Juan de Dios y el Instituto Materno Infantil; se adoptan medidas para la educación universitaria y se dictan otras disposiciones.*

Ley 972 de 200. *Por la cual se adoptan normas para mejorar la atención por parte del Estado colombiano de la población que padece de enfermedades ruinosas o catastróficas, especialmente el VIH/Sida.*

Ley 1122 de 2007. *Por la cual se hacen algunas modificaciones en el Sistema General de Seguridad Social en Salud y se dictan otras disposiciones.*

Decreto 291 de 1991. *Por el cual se reglamenta la acción de tutela consagrada en el artículo 86 de la Constitución Política.*

Decreto 148 de 1994. *Por el cual se regula la organización y funcionamiento de las Entidades Promotoras de Salud y la protección al usuario en el Sistema Nacional de Seguridad Social en Salud*

Decreto 806 de 1998. *Por el cual se reglamenta la afiliación al régimen de seguridad social en salud y la prestación de los beneficios del servicio público esencial de seguridad social en salud y como servicio de interés general, en todo el territorio nacional.*

Decreto 1804 de 1999. *Por el cual se expiden normas sobre el régimen subsidiado del Sistema General de Seguridad Social en Salud y se dictan otras disposiciones.*

Decreto 262 de 2000. *Por el cual se modifican la estructura y la organización de la Procuraduría General de la Nación y del Instituto de Estudios del Ministerio Público; el régimen de competencias interno de la Procuraduría General; se dictan normas para su funcionamiento; se modifica el régimen de carrera de la Procuraduría General de la Nación, el de inhabilidades e incompatibilidades de sus servidores y se regulan las diversas situaciones administrativas a las que se encuentren sujetos.*

Decreto 330 de 2001. *Por el cual se expiden normas para la constitución y funcionamiento de Entidades Promotoras de Salud conformadas por cabildos y/o autoridades tradicionales indígenas.*

Decreto 06 de 2004 . *Por el cual se modifica parcialmente el Decreto 515 de 2004 y se dictan otras disposiciones.*

Decreto 1 de 2004 . *Por el cual se define el Sistema de Habilitación de las Entidades Administradoras del Régimen Subsidiado, ARS.*

Decreto 1011 de 2006. *Por el cual se establece el Sistema Obligatorio de Garantía de Calidad de la Atención de Salud del Sistema General de Seguridad Social en Salud.*

Decreto 1018 de 2007. *Por el cual se modifica la estructura de la Superintendencia Nacional de Salud y se dictan otras disposiciones.*

Decreto 1698 de 2007. *Por el cual se modifica el Decreto 574 de 2007 que define las condiciones financieras y de solvencia del Sistema Único de Habilitación de Entidades Promotoras de Salud del Régimen Contributivo y Entidades Adaptadas.*

Acuerdo 83 de 1997. Consejo Nacional de Seguridad Social en Salud.

Acuerdo 8 de 1994 del Consejo Nacional de Seguridad Social en Salud.

Acuerdo 110 de 1998 del Consejo Nacional de Seguridad Social en Salud.

Acuerdo 306 de 200 del Consejo Nacional de Seguridad Social en Salud.

Acuerdo 228 de 2002 del Consejo Nacional de Seguridad Social en Salud.

Resolución 061 de 1997. *Por la cual se reglamentan los Comités Técnicos Científicos dentro de las Entidades Promotoras de Salud, Administradoras del Régimen Subsidiado e Instituciones Prestadoras de Servicios de Salud, y se dictan otras disposiciones.*

Resolución 2948 de 2003. *Por la cual se subrogan las Resoluciones 05061 de 1997 y 02312 de 1998 y se dictan otras disposiciones para la autorización y el recobro ante el Fosyga de medicamentos no incluidos en el Acuerdo 228 de CNSSS autorizados por el Comité Técnico Científico.*

Resolución 261 del de agosto de 1994. *Por la cual se establece el Manual de Actividades, Intervenciones y Procedimientos del Plan Obligatorio de Salud en el Sistema General de Seguridad Social en Salud.*

Resolución 1043 de 2006. *Por la cual se establecen las condiciones que deben cumplir los Prestadores de Servicios de Salud para habilitar sus servicios e implementar el componente de auditoría para el mejoramiento de la calidad de la atención y se dictan otras disposiciones.*

Resolución 144 de 2006. *Por la cual se defnen las funciones de la Entidad Acreditadora.*

Resolución 1446 de 2006. *Defnición del sistema de información para la calidad e indicadores de monitorización.*

Resolución 2933 de 2006. *Por la cual se reglamentan los Comités Técnico-Científicos y se establece el procedimiento de recobro ante el Fondo de Solidaridad y Garantía, Fosyga, por concepto de suministro de medicamentos no incluidos en el Plan Obligatorio de Salud, POS y de fallos de tutela.*

### ***Conceptos, circulares y resoluciones defensoriales***

Circular Externa 047 del 30 de noviembre de 2007. Página 1. Superintendencia Nacional de Salud. Documento consultado en página electrónica:

<http://www.supersalud.gov.co/RecepcionDatosVigilados/Inicio.aspx>

Procuraduría General de la Nación. Procuraduría Auxiliar para Asuntos Disciplinarios. Concepto C-23-06, Agosto 10 de 2006.

Resolución Defensorial No. 006 de 2001. *Desvío de recursos del régimen subsidiado; No. 010 Exclusión de afiliados al régimen subsidiado y duplicación de afiliaciones al Sistema General de Seguridad Social en Salud.*

Resolución Defensorial No. 020 de 2002. *Situación hospitalaria a escala nacional.*

Resolución Defensorial No. 022 de 2002. *Represamiento quirúrgico en el Instituto de Seguros Sociales.*

### ***Proyectos de ley y ponencias de trámite legislativo***

Informe de ponencia negativo para el primer debate del Proyecto de ley 209 de 200 Cá - mara-01 de 200 Senado, publicado en la *Gaceta del Congreso* No. 212 de 2006.

Proyecto de Ley No. 248 de 1992. *Por el cual se crea el Sistema Nacional de Seguridad Social.*

Proyecto de Acto Legislativo 10 de 2002 Senado. *Por medio del cual se reforma la Constitución Política en materia de administración de justicia.*

Proyecto de Acto Legislativo número 133. *Por el cual se reforman algunas disposiciones de la Constitución Política en materia de justicia*. Publicado en la *Gaceta del Congreso* No. 412 de 2006

Proyecto de Acto Legislativo número 13. *Mediante el cual se reforman los artículos 86, 235, 237 y 241 de la Constitución Política*, publicado en la *Gaceta del Congreso* No. 414 de 2006.

Proyecto de Acto Legislativo número 10. *Por el cual se reforman los artículos 86, 235, 237 y 241 de la Constitución Política*, publicado en la *Gaceta del Congreso* No. 466 de 2006.

Proyecto de ley estatutaria 01/0 Senado-209/0 Cámara. *Por medio de la cual se regula la protección judicial de algunos derechos sociales*. Publicado en la *Gaceta del Congreso* No. 46 del 200.

## 5. NORMATIVIDAD INTERNACIONAL

### *(Declaraciones, Tratados, Convenios, Opiniones, Observaciones e Informes de organismos especializados)*

Comisión Interamericana de Derechos Humanos. *Tercer informe sobre la situación de derechos humanos en Paraguay*, 2000, Cap V.

Conferencia Internacional sobre Atención Primaria de Salud, *Declaración de Alma Ata*, septiembre de 1978.

*Declaración de los Derechos de los Impedidos*, proclamada por la Asamblea General en su Resolución 3447 (XXX), del 9 de diciembre de 197.

*Declaración de los Derechos de los Enfermos Mentales*, proclamada por la Asamblea General en su Resolución 286 (XXVI), del 20 de diciembre de 1971.

*Declaración y Programa de Acción de Viena*. (A/CONF.17/23). Julio 12 de 1993. Conferencia Mundial de Derechos Humanos, Viena, 14 a 2 de junio de 1993.

*Declaración Universal de los Derechos Humanos*, adoptada y proclamada por la Asamblea General en su Resolución 217 A (III), de 10 de diciembre de 1948.

*Informe del Relator Especial sobre el derecho de toda persona al disfrute del más alto nivel posible de salud física y mental, Sr. Paul Hunt*. Naciones Unidas. Consejo de Derechos Humanos, A/HRC/7/11, 31 de enero de 2008, versión editada.

Naciones Unidas. *Conjunto de principios para la protección de todas las personas sometidas a cualquier forma de detención o prisión*. Adoptado por la Asamblea General en su Resolución 43/173, de 9 de diciembre de 1988.

Naciones Unidas. Comité de Derechos Económicos Sociales y Culturales. *Observación General N° 14. El derecho al disfrute del más alto nivel posible de salud*. 22° período de sesiones, 2000 Documento E/C.12/2000/4.

Naciones Unidas. Comité de Derechos Económicos Sociales y Culturales. *Observación General N° 3 relativa a la índole de las obligaciones de los Estados Parte*. 5º período de sesiones, 1990, Documento E/1991/23.

Naciones Unidas. *Convención Internacional sobre la Eliminación de todas las Formas de Discriminación Racial*. Adoptada por la Asamblea General en su Resolución 2106 A (XX) del 21 de diciembre de 1966.

Naciones Unidas. *Convención Internacional sobre la eliminación de todas las Formas de Discriminación contra la Mujer*. Adoptada por la Asamblea General en su Resolución 34/180 del 18 de diciembre de 1979.

Naciones Unidas. *Convención sobre los derechos del niño*. Adoptada por la Asamblea General en su Resolución 44/2 del 20 de noviembre de 1989.

Naciones Unidas. *Pacto Internacional de Derechos Civiles y Políticos*. Adoptado por la Asamblea General en su Resolución 2200 A (III) del 16 de diciembre de 1966.

Naciones Unidas. *Pacto Internacional de Derechos Económicos, Sociales y Culturales*. Adoptado por la Asamblea General en su Resolución 2200 A (III) del 16 de diciembre de 1966.

Naciones Unidas. *Principios a favor de las personas de la tercera edad*. Adoptados por la Asamblea General mediante Resolución 46/91 del 12 de diciembre de 1991.

Naciones Unidas. *Principios básicos para el tratamiento de los reclusos*. Adoptados y proclamados por la Asamblea General en su Resolución 4/111, de 14 de diciembre de 1990.

Naciones Unidas. *Principios Rectores de los Desplazamientos Internos*. Presentados por el Representante especial del Secretario General para la cuestión de los desplazados internos a la Comisión de Derechos Humanos en 1998, en su informe E/CN.4/1998/Add.2.

Naciones Unidas. *Reglas mínimas para el tratamiento de los reclusos*. Aprobadas por el Consejo Económico y Social en sus Resoluciones 663C (XXIV) del 31 de julio de 197 y 2076 (LXII) del 13 de mayo de 1977.

Organización de los Estados Americanos. *Declaración Americana sobre los derechos y deberes del hombre*. Aprobada en la Novena Conferencia Internacional Americana en Bogotá, 1948.

Organización de los Estados Americanos. *Convención Americana sobre Derechos Humanos – Pacto de San José de Costa Rica*. Suscrita el 22 de noviembre de 1969 en la Conferencia Especializada Interamericana sobre Derechos Humanos.

Organización Internacional del Trabajo. *Convenio 81 sobre la inspección del trabajo*.

Organización Internacional del Trabajo. *Convenio 102 de la OIT sobre seguridad social*.

Organización Internacional del Trabajo. *Convenio 121 de la OIT sobre accidentes de trabajo y enfermedades profesionales entre otros*.

Organización Internacional del Trabajo. *Convenio 169 de la OIT sobre pueblos indígenas y tribales en países independientes*.

*Principios de Limburgo*. Aprobados en Maastricht en 1996.

*Programa de Acción de la Conferencia Internacional sobre la Población y el Desarrollo*. Adoptada en El Cairo.

*Protocolo Adicional a la Convención Americana sobre Derechos Humanos en Materia de Derechos Económicos, Sociales y Culturales (Protocolo de San Salvador)*.

*Protocolo II adicional a los Convenios de Ginebra de 1949 referente a la protección de las víctimas de los conflictos armados de carácter internacional*. Adoptado el 8 de junio de 1977 por la Conferencia Diplomática sobre la Reafirmación y el Desarrollo del Derecho Internacional Humanitario aplicable a los conflictos armados.

## 6. JURISPRUDENCIA

### Sentencias de la Corte Constitucional

Sentencia T-406 de 1992

Sentencia T-70 de 1992

Sentencia T-71 de 1992

Sentencia T-61 de 1992

Sentencia T-036 de 1993

Sentencia T-232 de 1999

Sentencia T-379 de 1999

Sentencia T-413 de 1999

Sentencia C-60 de 1996

Sentencia C-613 de 1996

Sentencia T-484 de 1997

Sentencia C-21 de 1997

Sentencia SU-442 de 1997

Sentencia SU-480 de 1997

Sentencia C-112 de 1998

Sentencia T-13 de 1998

Sentencia SU-22 de 1998

Sentencia T-283 de 1998  
Sentencia T-328 de 1998  
Sentencia T-329 de 1998  
Sentencia T-428 de 1998  
Sentencia T-3 de 1998  
Sentencia C-99 de 1998  
Sentencia T-171 de 1999  
Sentencia T-209 de 1999  
Sentencia T-49 de 1999  
Sentencia T-823 de 1999  
Sentencia T-840 de 1999  
Sentencia T-1001 de 1999  
Sentencia T-179 de 2000  
Sentencia C-384 de 2000  
Sentencia C-7 de 2000  
Sentencia T-920 de 2000  
Sentencia C-1143 de 2000  
Sentencia C-116 de 2000  
Sentencia T-1384 de 2000  
Sentencia C-1489 de 2000  
Sentencia C-1641 de 2000  
Sentencia C-088 de 2001  
Sentencia T-233 de 2001  
Sentencia C-616 de 2001  
Sentencia C-649 de 2001  
Sentencia C-674 de 2001  
Sentencia T-93 de 2001  
Sentencia T-98 de 2001  
Sentencia T-1081 de 2001

Sentencia T-1207 de 2001  
Sentencia C-120 de 2001  
Sentencia T-002 de 2002  
Sentencia T-098 de 2002  
Sentencia T-274 de 2002  
Sentencia T-344 de 2002  
Sentencia C-41 de 2002  
Sentencia T-862 de 2002  
Sentencia C-974 de 2002  
Sentencia C-1071 de 2002  
Sentencia T-111 de 2003  
Sentencia T-64 de 2003  
Sentencia T-790 de 2003  
Sentencia T-89 de 2003  
Sentencia T-299 de 2004  
Sentencia C-623 de 2004  
Sentencia T-138 de 200  
Sentencia T-482 de 200  
Sentencia C-1032 de 2006  
Sentencia T-08 de 2007  
Sentencia T-261 de 2007  
Sentencia C-811 de 2007  
Sentencia C-037 de 2008  
Sentencia C-117 de 2008

**Sentencias de la Corte Interamericana de Derechos Humanos**

Sentencia Caso Ximenes Lopes contra Brasil. Fondo, Reparaciones y Costas. Sentencia de 4 de julio de 2006. Serie C No. 149.

Sentencia Caso Albán Cornejo y otros contra Ecuador. Fondo Reparaciones y Costas. Sentencia de 22 de noviembre de 2007. Serie C No. 171.



## ANEXO

### Actividades de investigación

#### 1. Fuentes secundarias

*a. Recopilación de las publicaciones institucionales, académicas y especializadas en materia de salud para la elaboración del mapa de fuentes secundarias. Solicitud formal de remisión de publicaciones, informes y diagnósticos disponibles en materia de salud:*

- Ministerio de Protección Social
- Departamento Nacional de Planeación
- Superintendencia Nacional de Salud
- Contraloría General de la República
- Alcaldía Mayor de Bogotá
- Gobernación de Cundinamarca
- Oficina de Planeación Departamental de Cundinamarca
- SISBEN Gobernación de Cundinamarca
- Instituto Nacional de Salud
- Instituto Colombiano de Bienestar Familiar – ICBF
- Federación Nacional de Municipios
- Secretaría Distrital de Salud de Bogotá
- Secretaría Departamental de Salud de Risaralda
- Secretaría de Salud de Pereira
- Secretaría de Salud del Atlántico
- Secretaría Distrital de Salud de Barranquilla
- Dirección SISBEN de Barranquilla
- Contraloría Distrital de Bogotá
- Personería de Bogotá

*b. Recopilación y análisis de los tratados internacionales, de los cuales hace parte el Estado Colombiano, que hacen parte del bloque de constitucionalidad en materia de los derechos humanos y los relacionados con el tema de la salud*

- Declaración Americana de los Derechos y Deberes del Hombre
- Declaración de Alma-Ata sobre la Atención Primaria en Salud
- Declaración y Programa de Acción de Viena
- Declaración de los Derechos del Retrasado Mental
- Programa de Acción de la Conferencia Internacional sobre Población y Desarrollo
- Pacto Internacional de Derechos Económicos, Sociales y Culturales
- Convención Internacional sobre la Eliminación de todas las Formas de Discriminación Racial
- Convención sobre la Eliminación de todas las Formas de Discriminación contra la Mujer
- Convención sobre los Derechos del Niño
- Convención Americana sobre Derechos Humanos
- Protocolo adicional a la Convención Americana sobre Derechos Humanos en Materia de Derechos Económicos, Sociales y Culturales, “Protocolo de San Salvador”
- Convención Interamericana para Prevenir, Sancionar y Erradicar la Violencia contra la Mujer
- Convención Interamericana para la Eliminación de todas las formas de Discriminación contra las Personas con Discapacidad
- Convenio sobre los Pueblos Indígenas y Tribales en Países Independientes (Convenio 169 de la OIT)

*c. Observaciones y recomendaciones del Comité de Derechos Económicos, Sociales y Culturales*

- Observación General N° 3
- Observación General N° 8
- Observación General N° 14 relativa al Artículo 12

*d. Recopilación de las publicaciones de las organizaciones internacionales y regionales en materia de salud*

*e. Recopilación preliminar de quejas tramitadas por las entidades del Ministerio Público y las entidades del subsistema IVC para la elaboración del mapa de quejas:*

- Procuraduría Delegada para la Descentralización y las Entidades Territoriales
- Procuraduría Delegada para la Vigilancia Preventiva para la Función Pública
- Procuraduría Regional de Caldas
- Procuraduría Regional de Risaralda
- Procuraduría Regional de Putumayo
- Procuraduría Regional de Norte de Santander
- Procuraduría Regional del Atlántico

- Procuraduría Regional de Antioquia
- Procuraduría Primera Distrital
- Procuraduría Segunda Distrital
- Procuraduría Provincial de Armenia
- Procuraduría Provincial del Valle de Aburra
- Procuraduría Provincial de Barranquilla
- Procuraduría Provincial de Pereira
- Personería Municipal de Pereira
- Personería Distrital de Barranquilla
- Defensoría del Pueblo del nivel nacional
- Defensorías Regional de Risaralda
- Defensorías Regionales de Atlántico
- Defensorías Regionales de Bogotá
- Superintendencia Nacional de Salud

*f. Recopilación y análisis de tutelas, en materia de salud, de la Corte Constitucional*

*g. Recopilación y análisis del marco regulatorio del Sistema General de Seguridad Social en Salud*

*h. Solicitud, recopilación y análisis de muestras aleatorias de 40 quejas en salud tramitadas por la Superintendencia Nacional de Salud, Defensoría del Pueblo (Regional Bogotá), Secretaría de Distrital de Salud de Bogotá, Procuraduría General de la Nación (Delegada para la Vigilancia Preventiva para la Función Pública) y Personería de Bogotá, en 2006.*

## **2. Fuentes primarias. Encuestas, entrevistas**

### *a. Encuestas*

- Elaboración, aplicación y tabulación de la encuesta exploratoria a los Procuradores Regionales
- Elaboración, aplicación y tabulación de la encuesta exploratoria a los Procuradores Provinciales.

### *b. Entrevistas*

#### **Procuraduría General de la Nación - Nivel nacional**

- Coordinación de Asesores del Despacho Grado 24, Derechos Humanos
- Coordinación de Asesores del Despacho Grado 24, en Regalías, Presupuesto y Salud
- División de Registro, Control y Correspondencia
- Grupo de Atención a la Población Desplazada de la Procuraduría Delegada para la Prevención en Materia de Derechos Humanos y Asuntos Étnicos
- Grupo de Cárceles de la Procuraduría Delegada para la Prevención en Materia de Derechos Humanos y Asuntos Étnicos

- Grupo de Asuntos Étnicos de la Procuraduría Delegada para la Prevención en Materia de Derechos Humanos y Asuntos Étnicos
- Procuraduría Delegada para la Economía y Hacienda
- Procuraduría Delegada para la Vigilancia Preventiva para la Función Pública
- Procuraduría Delegada para Asuntos Laborales
- Procuraduría Delegada para la Descentralización y las Entidades Territoriales

#### **Procuraduría General de la Nación - Nivel territorial**

- Procuraduría Regional del Atlántico
- Procuraduría Regional de Risaralda
- Procuraduría Provincial del Valle de Aburrá
- Procuraduría Provincial de Risaralda

#### **Defensoría del Pueblo**

- Secretaría General
- Grupo Prosedher
- Programa de Salud
- Dirección Nacional de Atención y Trámite de Quejas

#### **Personería Distrital de Bogotá**

- Secretaría General
- Coordinación Grupo Judicial

#### **Personería Distrital de Barranquilla**

- Personero Distrital
- Grupo Atención Inmediata

#### **Personería de Pereira**

- Personero Municipal
- Grupo Derechos Humanos

#### **Secretaría de Salud Distrital de Bogotá**

- Coordinación de Atención al Ciudadano
- Dirección de Aseguramiento en Salud - Vinculados
- Dirección de Aseguramiento en Salud - Garantía de calidad
- Dirección de Aseguramiento - Grupo Tutelas

#### **Secretaría de Salud Distrital de Barranquilla**

- Secretario de Salud
- Oficina de Planeación
- Asesores del Despacho

### Secretaría de Salud de Pereira

- Oficina de Quejas de la Secretaría de Salud

### Superintendencia Nacional de Salud

- Oficina Asesora Jurídica
- Superintendencia Delegada para la Protección al Usuario y la Participación Ciudadana

### Expertos en el tema de salud

- Luis Jorge Garay. Investigador Planeta Paz. Docente Universidad Nacional y Universidad de los Andes
- Gabriel Misas Arango. Investigador y Docente Universidad Nacional, Facultad de Economía. Director del Instituto de Estudios Políticos y Relaciones Internacionales (IEPRI)
- Luis Eduardo Pérez. Docente Derecho y Desarrollo Universidad de los Andes.
- Miguel Uprimny. Médico. Investigador en el tema de derecho a la salud en Colombia
- Darío Mejía. Secretario General - Defensoría del Pueblo
- Óscar Rodríguez. Docente Universidad Nacional de Colombia, Facultad de Economía. Investigador del Centro de Investigaciones para el Desarrollo CID
- Jorge Bernal Conde. Subsecretario Distrital de Salud

### Movimiento Nacional por la Salud y Seguridad Social

Entrevistas realizadas:

| Ciudad       | Entidad                              | Tipo de entrevista |
|--------------|--------------------------------------|--------------------|
| Bogotá       | Procuraduría General de la Nación    | Personales         |
|              | SNS                                  | Personales         |
|              | Secretaría Distrital de Salud        | Personales         |
|              | Defensoría del Pueblo                | Personales         |
|              |                                      | Telefónicas        |
|              | Personería Distrital                 | Personales         |
|              | Movimiento Nacional de Salud         | Personales         |
|              | Expertos                             | Personales         |
| Barranquilla | PGN                                  | Telefónicas        |
|              | Personería Distrital de Barranquilla | Personales         |
|              | Secretaría Distrital de Salud        | Personales         |
| Pereira      | PGN                                  | Telefónicas        |
|              | Secretaría de Salud                  | Telefónica         |
|              | Personería                           | Personales         |
