# Supplementary material
Source: publisher figshare collection journal article supplement (https://tandf.figshare.com/articles/dataset/_/10732607)
Supplement: Supplementary file 1 [file 2 › fjds_a_1690134_sm1276.pdf]

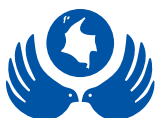

Defensoría  
del Pueblo  
COLOMBIA

## LA TUTELA Y LOS DERECHOS A LA SALUD Y A LA SEGURIDAD SOCIAL 2014

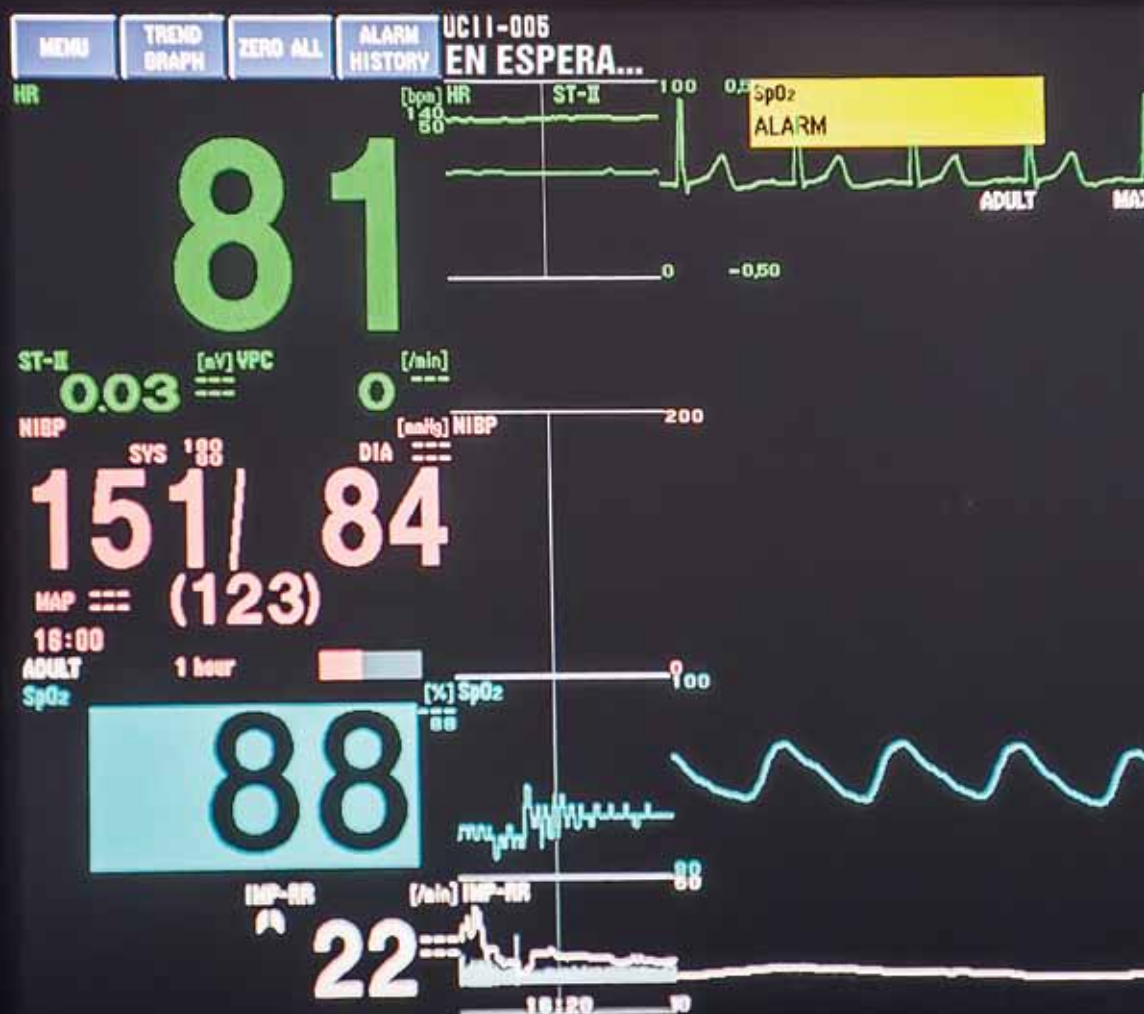



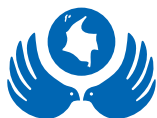

Defensoría  
del Pueblo  
C O L O M B I A

# La tutela y los derechos a la salud y a la seguridad social

---

## 2014

## **Defensoría del Pueblo**

**Jorge Armando Otálora Gómez**  
Defensor del Pueblo

**Esiquio Manuel Sánchez Herrera**  
Vicedefensor del Pueblo

**Alfonso Cajiao Cabrera**  
Secretario General

**Norberto Acosta Rubio**  
Delegado para la Salud, la Seguridad Social y  
la Discapacidad

Equipo investigador

**Alexandra Orjuela Guerrero**  
Médica, especialista en salud familiar y en  
seguridad social

**Lyda Mariana González Lizarazo**  
Abogada, especialista en derecho público y  
en seguridad social

**Hilario Pardo Ariza**  
Estadístico, abogado, magíster en ciencias  
financieras y sistemas

**Edwin Julián Angulo**  
Ingeniero de Sistemas

Diagramación e Impresión:

**Leonardo Parra Puentes**  
**Diseño y diagramación**

**Iván Mauricio Lombana Villalba**  
**Corrección de estilo**

**Julio César Granados**  
**Fotografía**

**Imprenta Nacional de Colombia**  
Impresión

Defensoría del Pueblo

© **Defensoría del Pueblo**  
El presente texto se puede reproducir,  
fotocopiar, replicar, total o parcialmente,  
siempre que se cite la fuente.

**Defensoría del Pueblo de Colombia**  
Calle 55 No. 10-32  
Código postal: 110231  
[www.defensoria.gov.co](http://www.defensoria.gov.co)  
Apartado aéreo 24299 - Bogotá, D.C.  
Teléfonos: 3144000 Ext. 2323  
Bogotá, D.C., Julio de 2015  
ISBN:

# Contenido

|                                                                         |           |
|-------------------------------------------------------------------------|-----------|
| <b>Agradecimientos.....</b>                                             | <b>13</b> |
| <b>INTRODUCCIÓN.....</b>                                                | <b>15</b> |
| <b>CAPÍTULO I.</b>                                                      |           |
| <b>ASPECTOS DE PROTECCIÓN</b>                                           |           |
| <b>DEL DERECHO FUNDAMENTAL A LA SALUD .....</b>                         | <b>19</b> |
| 1. CRITERIOS DECISORIOS ADOPTADOS                                       |           |
| POR LA HONORABLE CORTE                                                  |           |
| CONSTITUCIONAL EN 2014.....                                             | 19        |
| 1.1. El suministro de medicamentos                                      |           |
| no registrados ante el INVIMA.....                                      | 19        |
| 1.2. La acción de tutela y los contratos                                |           |
| de medicina prepagada.....                                              | 19        |
| 1.3. El servicio de transporte en el sistema de salud .....             | 21        |
| 1.4. Allanamiento a la mora en el caso de las incapacidades.....        | 22        |
| 1.5. Los fines funcionales de las cirugías estéticas.....               | 23        |
| 1.6. Las reglas establecidas por la Corte Constitucional también        |           |
| se aplican los regímenes de excepción .....                             | 23        |
| 1.7. Del servicio de auxiliar de enfermería                             |           |
| y su diferencia con el cuidador .....                                   | 24        |
| 1.8. Derecho de los miembros de las Fuerzas Militares y de la Policía   |           |
| Nacional a obtener una nueva valoración médica .....                    | 25        |
| 1.9. El Sistema de pagos moderadores                                    |           |
| y las enfermedades de alto costo como excepción .....                   | 26        |
| 1.10. El derecho al transporte de los                                   |           |
| miembros afiliados al subsistema de salud de las Fuerzas Militares .... | 26        |
| 1.11. Derecho a la salud de la población reclusa.....                   | 28        |
| 1.12. Del pago del subsidio por Incapacidad temporal .....              | 29        |
| 1.13. De la suspensión de los servicios                                 |           |
| de salud por mora en el pago de aportes .....                           | 30        |
| 1.14. La esterilización quirúrgica en mujeres                           |           |
| en condición de discapacidad.....                                       | 31        |
| 1.15. Traslado de los restos del paciente fallecido.....                | 32        |
| 1.16. Régimen del contrato de seguros en caso de accidente .....        | 33        |
| 2. SENTENCIA C-313 DE 2014.....                                         | 37        |

## **CAPÍTULO II.**

|                                                                                                                                        |           |
|----------------------------------------------------------------------------------------------------------------------------------------|-----------|
| <b>DERECHO A LA SEGURIDAD SOCIAL .....</b>                                                                                             | <b>43</b> |
| 1. SISTEMA GENERAL DE PENSIONES (SGP) .....                                                                                            | 43        |
| 1.1. El Derecho a la pensión en Colombia.....                                                                                          | 43        |
| 1.2. El Derecho pensional en el Plan<br>Nacional de Desarrollo (PND) 2014 – 2018 .....                                                 | 44        |
| 1.3. Acciones de la Defensoría del Pueblo.....                                                                                         | 45        |
| 1.4. Cartilla “Lo básico que usted debe saber sobre<br>el Régimen de Prima Media con Prestación Definida” .....                        | 47        |
| 1.5. Jurisprudencia.....                                                                                                               | 47        |
| 2. SISTEMA GENERAL DE RIESGOS LABORALES.....                                                                                           | 56        |
| 2.1. Finalidad del Sistema General de Riesgos Laborales (SGRL).....                                                                    | 56        |
| 2.2. Reglamentación juntas de invalidez.....                                                                                           | 56        |
| 2.3. Criterios de graduación de las multas por infracción<br>a las normas de seguridad y salud en el trabajo y Riesgos Laborales ..... | 57        |
| 2.4. Acciones adelantadas por la Defensoría del Pueblo .....                                                                           | 60        |
| 2.5. Jurisprudencia.....                                                                                                               | 60        |

## **III. CAPÍTULO**

### **ANÁLISIS DE LAS TUTELAS**

|                                                                                         |           |
|-----------------------------------------------------------------------------------------|-----------|
| <b>INTERPUESTAS EN COLOMBIA EN 2014.....</b>                                            | <b>65</b> |
| 1. Objetivos .....                                                                      | 65        |
| 1.1. Objetivo general .....                                                             | 65        |
| 1.2. Objetivos específicos .....                                                        | 65        |
| 2. Aspectos metodológicos .....                                                         | 66        |
| 2.1. Descripción de las muestras.....                                                   | 67        |
| 3. Resultados.....                                                                      | 68        |
| 3.1. La tutela en Colombia durante 2014 .....                                           | 68        |
| 3.2. La tutela y el derecho a la salud.....                                             | 85        |
| 3.3. Análisis de los hechos en las tutelas de salud 2014. ....                          | 114       |
| 3.4. Tutelas para exigir contenidos<br>del POS y No POS en los servicios de salud. .... | 129       |
| 3.5. La tutela y el derecho a la seguridad social .....                                 | 155       |

|                          |            |
|--------------------------|------------|
| <b>CONCLUSIONES.....</b> | <b>167</b> |
|--------------------------|------------|

|                                        |     |
|----------------------------------------|-----|
| 1. Tutelas en general .....            | 167 |
| 2. Derecho a la salud.....             | 168 |
| 2.1. Régimen Contributivo. ....        | 169 |
| 2.2. Régimen Subsidiado .....          | 171 |
| 3. Derecho a la seguridad social ..... | 172 |

|                              |            |
|------------------------------|------------|
| <b>RECOMENDACIONES .....</b> | <b>175</b> |
|------------------------------|------------|

|                    |            |
|--------------------|------------|
| <b>ANEXOS.....</b> | <b>179</b> |
|--------------------|------------|

|                |
|----------------|
| <b>Anexo 1</b> |
|----------------|

|                                                                         |     |
|-------------------------------------------------------------------------|-----|
| Ficha de Recolección de información de tutelas en salud.....            | 179 |
| <b>Anexo 2</b>                                                          |     |
| Ficha de Recolección de información de tutelas en seguridad social..... | 180 |
| <b>Anexo 3</b>                                                          |     |
| Tabla de Capítulos y Bloques de códigos de Diagnósticos.....            | 181 |

## Tablas

|                                                                                                                                                              |     |
|--------------------------------------------------------------------------------------------------------------------------------------------------------------|-----|
| <b>Tabla 1.</b> Registro de tutelas en Colombia. Periodo 1992-2014.....                                                                                      | 69  |
| <b>Tabla 2.</b> Derechos invocados en las tutelas. Periodo 2013-2014.....                                                                                    | 72  |
| <b>Tabla 3.</b> Número de tutelas en Colombia, según Departamento<br>Periodo 2013-2014.....                                                                  | 77  |
| <b>Tabla 4.</b> Número de tutelas en Colombia por cada 10.000 habitantes<br>Según departamento. Periodo 2013-2014.....                                       | 80  |
| <b>Tabla 5.</b> Entidades con más tutelas en el país. Periodo 2013-2014.....                                                                                 | 82  |
| <b>Tabla 6.</b> Despachos Judiciales y decisión en primera Instancia.<br>Periodo 2013 – 2014.....                                                            | 84  |
| <b>Tabla 7.</b> Participación de las tutelas de salud. Periodo 2013 – 2014.....                                                                              | 86  |
| <b>Tabla 8.</b> Tutelas de salud según departamento. Periodo 2013 – 2014.....                                                                                | 89  |
| <b>Tabla 9.</b> Número de tutelas en salud por cada 10.000 habitantes<br>Según departamento. Periodo- 2013-2014.....                                         | 91  |
| <b>Tabla 10.</b> Número de municipios según tutelas en salud por cada<br>10.000 habitantes. Periodo 2013 – 2014.....                                         | 92  |
| <b>Tabla 11.</b> Número de municipios según tutelas en salud<br>por cada 10.000 habitantes. Periodo 2013 – 2014.....                                         | 92  |
| <b>Tabla 12.</b> Despachos Judiciales y decisión en<br>primera instancia Tutelas en Salud. Periodo 2013 – 2014.....                                          | 94  |
| <b>Tabla 13.</b> El derecho a la salud en asocio con otros derechos Periodo 2013 – 2014.....                                                                 | 95  |
| <b>Tabla 14.</b> Entidades más tuteladas en derecho a la salud. Periodo 2013 – 2014.....                                                                     | 98  |
| <b>Tabla 15.</b> Tutelas en salud, según tipo de entidad demandada. Periodo 2013 – 2014...                                                                   | 100 |
| <b>Tabla 16.</b> Número de afiliados en el régimen contributivo. Periodo 2013 – 2014.....                                                                    | 101 |
| <b>Tabla 17.</b> Tutelas en salud, según tipo de entidad demandada Periodo 2013 – 2014.....                                                                  | 102 |
| <b>Tabla 18.</b> Número de tutelas por cada 10.000 afiliados.<br>EPS que prestan servicio únicamente en el régimen contributivo.<br>Periodo 1999 – 2014..... | 103 |
| <b>Tabla 19.</b> Número de afiliados en el régimen subsidiado.<br>Periodo 2013 – 2014.....                                                                   | 104 |
| <b>Tabla 20.</b> Tutelas en salud en régimen subsidiado,<br>según entidad demandada. Periodo 2013 – 2014.....                                                | 105 |
| <b>Tabla 21.</b> Número de tutelas por cada 10.000 afiliados<br>EPS que prestan servicio únicamente en el régimen subsidiado.<br>Periodo 2003 – 2014.....    | 106 |
| <b>Tabla 22.</b> Tutelas en entidades que prestan servicios en los dos regímenes<br>Periodo 2013 – 2014.....                                                 | 107 |
| <b>Tabla 23.</b> Número de tutelas por cada 10.000 afiliados<br>EPS que prestan servicio en los dos regímenes. Periodo 2003 – 2014.....                      | 107 |
| <b>Tabla 24.</b> Tutelas en salud contra entidades territoriales. Periodo 2013 – 2014.....                                                                   | 110 |
| <b>Tabla 25.</b> Tutelas en salud contra IPS. Periodo 2013 – 2014.....                                                                                       | 111 |
| <b>Tabla 26.</b> Tutelas en salud contra Inpec/penitenciarias según departamento.<br>Periodo 2013 – 2014.....                                                | 112 |
| <b>Tabla 27.</b> Tutelas en salud contra entidades de régimen especial.<br>Periodo 2013 – 2014.....                                                          | 113 |
| <b>Tabla 28.</b> Tutelas en salud contra Administradoras de fondos de pensiones<br>Periodo 2013 – 2014.....                                                  | 113 |
| <b>Tabla 29.</b> Tutelas en salud contra ARL y Compañías de seguros.<br>Periodo 2013 – 2014.....                                                             | 114 |

|                                                                                                                                                 |     |
|-------------------------------------------------------------------------------------------------------------------------------------------------|-----|
| <b>Tabla 30.</b> Solicitudes más frecuentes en las tutelas de salud. Periodo 2013 – 2014 .....                                                  | 115 |
| <b>Tabla 31.</b> Solicitudes más frecuentes en las tutelas de salud por régimen.<br>Periodo 2014.....                                           | 117 |
| <b>Tabla 32.</b> Especialidades más frecuentes en las tutelas. Periodo 2013 - 2014.....                                                         | 118 |
| <b>Tabla 33.</b> Especialidades más frecuentes en las tutelas según Régimen.<br>Periodo 2014.....                                               | 119 |
| <b>Tabla 34.</b> Diagnósticos en las tutelas. Periodo 2013-2014 .....                                                                           | 120 |
| <b>Tabla 35.</b> Diagnósticos en las tutelas según Régimen. Periodo 2014.....                                                                   | 122 |
| <b>Tabla 36.</b> Tutelas por diagnóstico de Tumores. Periodo 2014 .....                                                                         | 123 |
| <b>Tabla 37.</b> Tutelas por diagnóstico de Enfermedades del sistema circulatorio.<br>Periodo 2014.....                                         | 124 |
| <b>Tabla 38.</b> Tutelas por diagnóstico de Enfermedades del Sistema Genitourinario.<br>Periodo 2014.....                                       | 125 |
| <b>Tabla 39.</b> Otras solicitudes relacionadas con el sistema. Periodo 2013 – 2014.....                                                        | 126 |
| <b>Tabla 40.</b> Otras solicitudes relacionadas con el sistema según Régimen<br>Periodo 2014.....                                               | 127 |
| <b>Tabla 41.</b> Otras solicitudes. Periodo 2013 – 2014.....                                                                                    | 128 |
| <b>Tabla 42.</b> Otras solicitudes según régimen. Periodo 2014.....                                                                             | 129 |
| <b>Tabla 43.</b> Porcentaje de solicitudes POS en cada régimen. Periodo 2003-2014 .....                                                         | 132 |
| <b>Tabla 44.</b> Solicitudes en tutelas de salud. Regímenes contributivo y subsidiado<br>Periodo 2013-2014 .....                                | 134 |
| <b>Tabla 45.</b> Solicitudes más frecuentes en las tutelas interpuestas<br>en los regímenes contributivo y subsidiado. Periodo 2013- 2014 ..... | 135 |
| <b>Tabla 46.</b> Distribución de los contenidos en Pos y No Pos. Año 2014 .....                                                                 | 136 |
| <b>Tabla 47.</b> Solicitudes más frecuentes en las tutelas interpuestas<br>régimen contributivo. Periodo 2013- 2014.....                        | 136 |
| <b>Tabla 48.</b> Distribución de los contenidos en Pos y No Pos<br>en régimen contributivo. Año 2014.....                                       | 137 |
| <b>Tabla 49.</b> Solicitudes más frecuentes en las tutelas interpuestas<br>en el régimen subsidiado. Periodo 2013- 2014.....                    | 137 |
| <b>Tabla 50.</b> Distribución de los contenidos en Pos y No<br>Pos en el régimen subsidiado. Año 2014.....                                      | 138 |
| <b>Tabla 51.</b> Distribución de los tratamientos en Pos y No Pos. Periodo 2013-2014.....                                                       | 139 |
| <b>Tabla 52.</b> Distribución de los tratamientos según régimen. Periodo 2014 .....                                                             | 140 |
| <b>Tabla 53.</b> Distribución de los medicamentos en Pos y No Pos. Periodo 2013-2014 ..                                                         | 141 |
| <b>Tabla 54.</b> Distribución de los medicamentos según régimen. Periodo 2014.....                                                              | 142 |
| <b>Tabla 55.</b> Distribución de las citas médicas especializadas en Pos y No Pos.<br>Periodo 2013-2014.....                                    | 143 |
| <b>Tabla 56.</b> Distribución de las citas médicas especializadas según régimen<br>Periodo 2014.....                                            | 144 |
| <b>Tabla 57.</b> Distribución de las prótesis, órtesis e insumos en Pos y No Pos<br>Periodo 2013-2014.....                                      | 145 |
| <b>Tabla 58.</b> Distribución de las prótesis, órtesis e insumos según régimen<br>Periodo 2014.....                                             | 146 |
| <b>Tabla 59.</b> Distribución de las cirugías en Pos y No Pos. Periodo 2013-2014.....                                                           | 147 |
| <b>Tabla 60.</b> Distribución de las cirugías según régimen. Periodo 2014 .....                                                                 | 148 |
| <b>Tabla 61.</b> Distribución de las imágenes diagnósticas en Pos y No Pos<br>Periodo 2013-2014.....                                            | 149 |
| <b>Tabla 62.</b> Distribución de las imágenes diagnósticas según régimen<br>Periodo 2014.....                                                   | 150 |
| <b>Tabla 63.</b> Distribución de los exámenes paraclínicos en Pos y No Pos<br>Periodo 2013-2014.....                                            | 151 |

|                                                                                                                                           |     |
|-------------------------------------------------------------------------------------------------------------------------------------------|-----|
| <b>Tabla 64.</b> Distribución de los exámenes paraclínicos según régimen. Periodo 2014.....                                               | 152 |
| <b>Tabla 65.</b> Distribución de los procedimientos en Pos y No Pos. Periodo 2013-2014.....                                               | 153 |
| <b>Tabla 66.</b> Distribución de los procedimientos según régimen. Periodo 2014.....                                                      | 154 |
| <b>Tabla 67.</b> Participación de las tutelas en Seguridad Social. Periodo 2011- 2014.....                                                | 155 |
| <b>Tabla 68.</b> Tutelas de seguridad social según departamento. Periodo 2013 – 2014.....                                                 | 156 |
| <b>Tabla 69.</b> Despachos Judiciales y decisión en primera Instancia. Tutelas en seguridad social. Periodo 2013 – 2014.....              | 158 |
| <b>Tabla 70.</b> El derecho a la seguridad social en asocio con otros derechos. Periodo 2013 – 2014.....                                  | 159 |
| <b>Tabla 71.</b> Entidades más tuteladas en derecho a la seguridad social. Periodo 2013 – 2014.....                                       | 160 |
| <b>Tabla 72.</b> Tutelas en seguridad social según tipo de entidad demandada. Periodo 2013 – 2014.....                                    | 161 |
| <b>Tabla 73.</b> Tutelas en seguridad social contra los Fondos de Pensiones. Periodo 2013 – 2014.....                                     | 162 |
| <b>Tabla 74.</b> Tutelas en seguridad social contra EPS. Periodo 2013 – 2014.....                                                         | 162 |
| <b>Tabla 75.</b> Tutelas en seguridad social contra Administradoras de Riesgos Laborales y Compañías de Seguros. Periodo 2013 – 2014..... | 163 |
| <b>Tabla 76.</b> Contenidos más frecuentes en las tutelas de seguridad social. Periodo 2013-2014.....                                     | 164 |



## Gráficas

|                                                                                                                       |     |
|-----------------------------------------------------------------------------------------------------------------------|-----|
| <b>Gráfica 1.</b> Derechos más invocados en las tutelas. Periodo 2003-2014.....                                       | 73  |
| <b>Gráfica 2.</b> Evolución de las tutelas en Colombia. Periodo 1999 – 2014 .....                                     | 86  |
| <b>Gráfica 3.</b> Número de tutelas por cada 10.000 afiliados en cada EPS en 2013.....                                | 108 |
| <b>Gráfica 4.</b> Número de tutelas por cada 10.000 afiliados en cada EPS en 2014.....                                | 109 |
| <b>Gráfica 5.</b> Solicitudes más frecuentes en las tutelas de salud .....                                            | 116 |
| <b>Gráfica 6.</b> Evolución de las solicitudes POS en las tutelas. Periodo 2003-2014 .....                            | 132 |
| <b>Gráfica 7.</b> Evolución de las solicitudes POS en las<br>tutelas del régimen contributivo. Periodo 2003-2014..... | 133 |
| <b>Gráfica 8.</b> Evolución de las solicitudes POS<br>en las tutelas del régimen subsidiado. Periodo 2003-2014.....   | 133 |
| <b>Gráfica 9.</b> Contenido POS en las Tutelas. Periodo 2013-2014 .....                                               | 134 |
| <b>Gráfica 10.</b> Contenido POS en Tratamientos. Periodo 2013-2014.....                                              | 139 |
| <b>Gráfica 11.</b> Contenido POS en Medicamentos. Periodo 2013-2014 .....                                             | 141 |
| <b>Gráfica 12.</b> Contenido POS en citas médicas especializadas. Periodo 2013-2014.....                              | 144 |
| <b>Gráfica 13.</b> Contenido POS en prótesis, órtesis e insumos. Periodo 2013-2014.....                               | 145 |
| <b>Gráfica 14.</b> Contenido POS en cirugías. Periodo 2013-2014.....                                                  | 147 |
| <b>Gráfica 15.</b> Contenido POS en imágenes diagnósticas. Periodo 2013-2014 .....                                    | 149 |
| <b>Gráfica 16.</b> Contenido POS en exámenes paraclínicos. Periodo 2013-2014 .....                                    | 151 |
| <b>Gráfica 17.</b> Contenido POS en procedimientos. Periodo 2013-2014.....                                            | 153 |

## Mapas

|                                                                                                    |     |
|----------------------------------------------------------------------------------------------------|-----|
| <b>Mapa 1.</b> Derechos más invocados en cada municipio en 2013 .....                              | 70  |
| <b>Mapa 2.</b> Derechos más invocados en cada municipio en 2014 .....                              | 70  |
| <b>Mapa 3.</b> Municipios con tutelas en salud en 2013 .....                                       | 90  |
| <b>Mapa 4.</b> Municipios con tutelas en salud en 2014 .....                                       | 90  |
| <b>Mapa 5.</b> Número de tutelas en salud por cada 10.000 habitantes en cada municipio, 2013 ..... | 93  |
| <b>Mapa 6.</b> Número de tutelas en salud por cada 10.000 habitantes en cada municipio, 2014.....  | 93  |
| <b>Mapa 7.</b> Municipios con tutelas en seguridad social. Periodo 2013.....                       | 157 |
| <b>Mapa 8.</b> Municipios con tutelas en seguridad social. Periodo 2014.....                       | 157 |



## Agradecimientos

A los honorables magistrados y al equipo técnico de la Corte Constitucional, quienes facilitaron la base de datos de tutelas correspondiente al año 2014, lo que permitió la elaboración del presente estudio.

Igualmente, a los doctores John Alberto Marulanda Restrepo y Herman Redondo Gómez, médicos asesores de la Defensoría del Pueblo, por sus invaluables aportes en el desarrollo de este documento.



# INTRODUCCIÓN

Desde la creación de la Organización Mundial de la Salud OMS– en abril de 1948, como la autoridad directiva y coordinadora de la acción sanitaria en el Sistema de las Naciones Unidas –ONU-, se estableció como principio internacional fundamental “el goce del grado máximo de salud que se pueda lograr”, de acuerdo al nivel de desarrollo económico, político y social de cada país, como uno de los derechos fundamentales de todo ser humano, sin distinción de raza, religión, ideología política o condición social o económica.

La observancia de los instrumentos internacionales de Derechos Humanos resulta útil y necesaria para el progreso de los pueblos y para el cumplimiento de los Objetivos del Desarrollo del Milenio, que los países miembros de las Naciones Unidas acordaron conseguir para 2015. Especialmente en lo relacionado con erradicar la pobreza extrema y el hambre, reducir la mortalidad infantil, mejorar la salud materna, promover la igualdad entre los géneros, garantizar la sostenibilidad del medio ambiente y combatir el VIH/SIDA, el paludismo y otras enfermedades.

En cumplimiento de su misión constitucional de defender y promover los Derechos Humanos, la Defensoría del Pueblo, viene haciendo el seguimiento al respeto del derecho fundamental a la salud, con la colaboración de la Honorable Corte Constitucional; particularmente, a las acciones de tutela interpuestas por los ciudadanos, para lo cual presenta la novena versión del estudio, con los resultados encontrados en 2014.

Las cifras halladas en el estudio muestran que desde su creación hasta diciembre de 2014, los colombianos interpusieron 4'698.597 tutelas por violaciones a algún derecho fundamental; de las cuales, en promedio, el 29,36% correspondieron a solicitudes por necesidades de atención en salud. En el 83,2% de estas acciones, los jueces de la república accedieron a las peticiones de los usuarios de salud, lo que indica su alto nivel de pertinencia y la procedibilidad de la misma para que por esta vía se logre subsanar una conducta violatoria, repetitiva, de este derecho fundamental.

La pérdida de confianza y de legitimidad en el Sistema de Salud en Colombia se refleja en el creciente número de quejas, peticiones y reclamos ante los organismos de control por conductas violatorias del derecho fundamental a la salud, con un creciente número de acciones de tutelas, como lo demuestra el presente estudio.

Los resultados encontrados por la Defensoría del Pueblo en 2014, muestran que los colombianos tuvieron que acudir a 498.240 acciones para evitar vulneraciones de cualquier derecho fundamental, la cifra más alta desde que la Constitución de 1991 aprobó este mecanismo, de las cuales 118.281 tutelas fueron interpuestas para reclamar violaciones al derecho a la salud, con un incremento del 2,7% en relación con el 2013, lo que representa un 23,7% del total de las tutelas durante dicho periodo.

Las solicitudes de actividades, intervenciones, procedimientos e insumos ya incluidos en el Plan Obligatorio de Salud (POS) continúan en el 65,74% y a pesar de haber disminuido levemente con relación a 2013, es altamente preocupante como factor de evaluación de la capacidad resolutoria del Sistema frente a las necesidades de atención en salud de la población.

Con la sanción de la Ley 1751 de 2015 se consagra en el país la primera Ley Estatutaria para reglamentar un derecho fundamental, cuyo objetivo es el de garantizar el goce efectivo del derecho a la salud, regularlo y establecer sus mecanismos de protección; definir su núcleo esencial, sus alcances y límites, sus elementos esenciales y los principios que subordinan cualquier otra norma legal que en el pasado o en el futuro regule o reglamente el Sistema de Salud.

Se espera que con la expedición de la Ley Estatutaria, su reglamentación, y puesta en práctica, se materialice el goce efectivo del derecho fundamental a la salud, de tal forma que los resultados futuros en la calidad y la oportunidad de la prestación de los servicios de salud reflejen la mejoría en la respuesta del sistema de salud frente a las necesidades de la población.

**JORGE ARMANDO OTÁLORA GÓMEZ**

Defensor del Pueblo



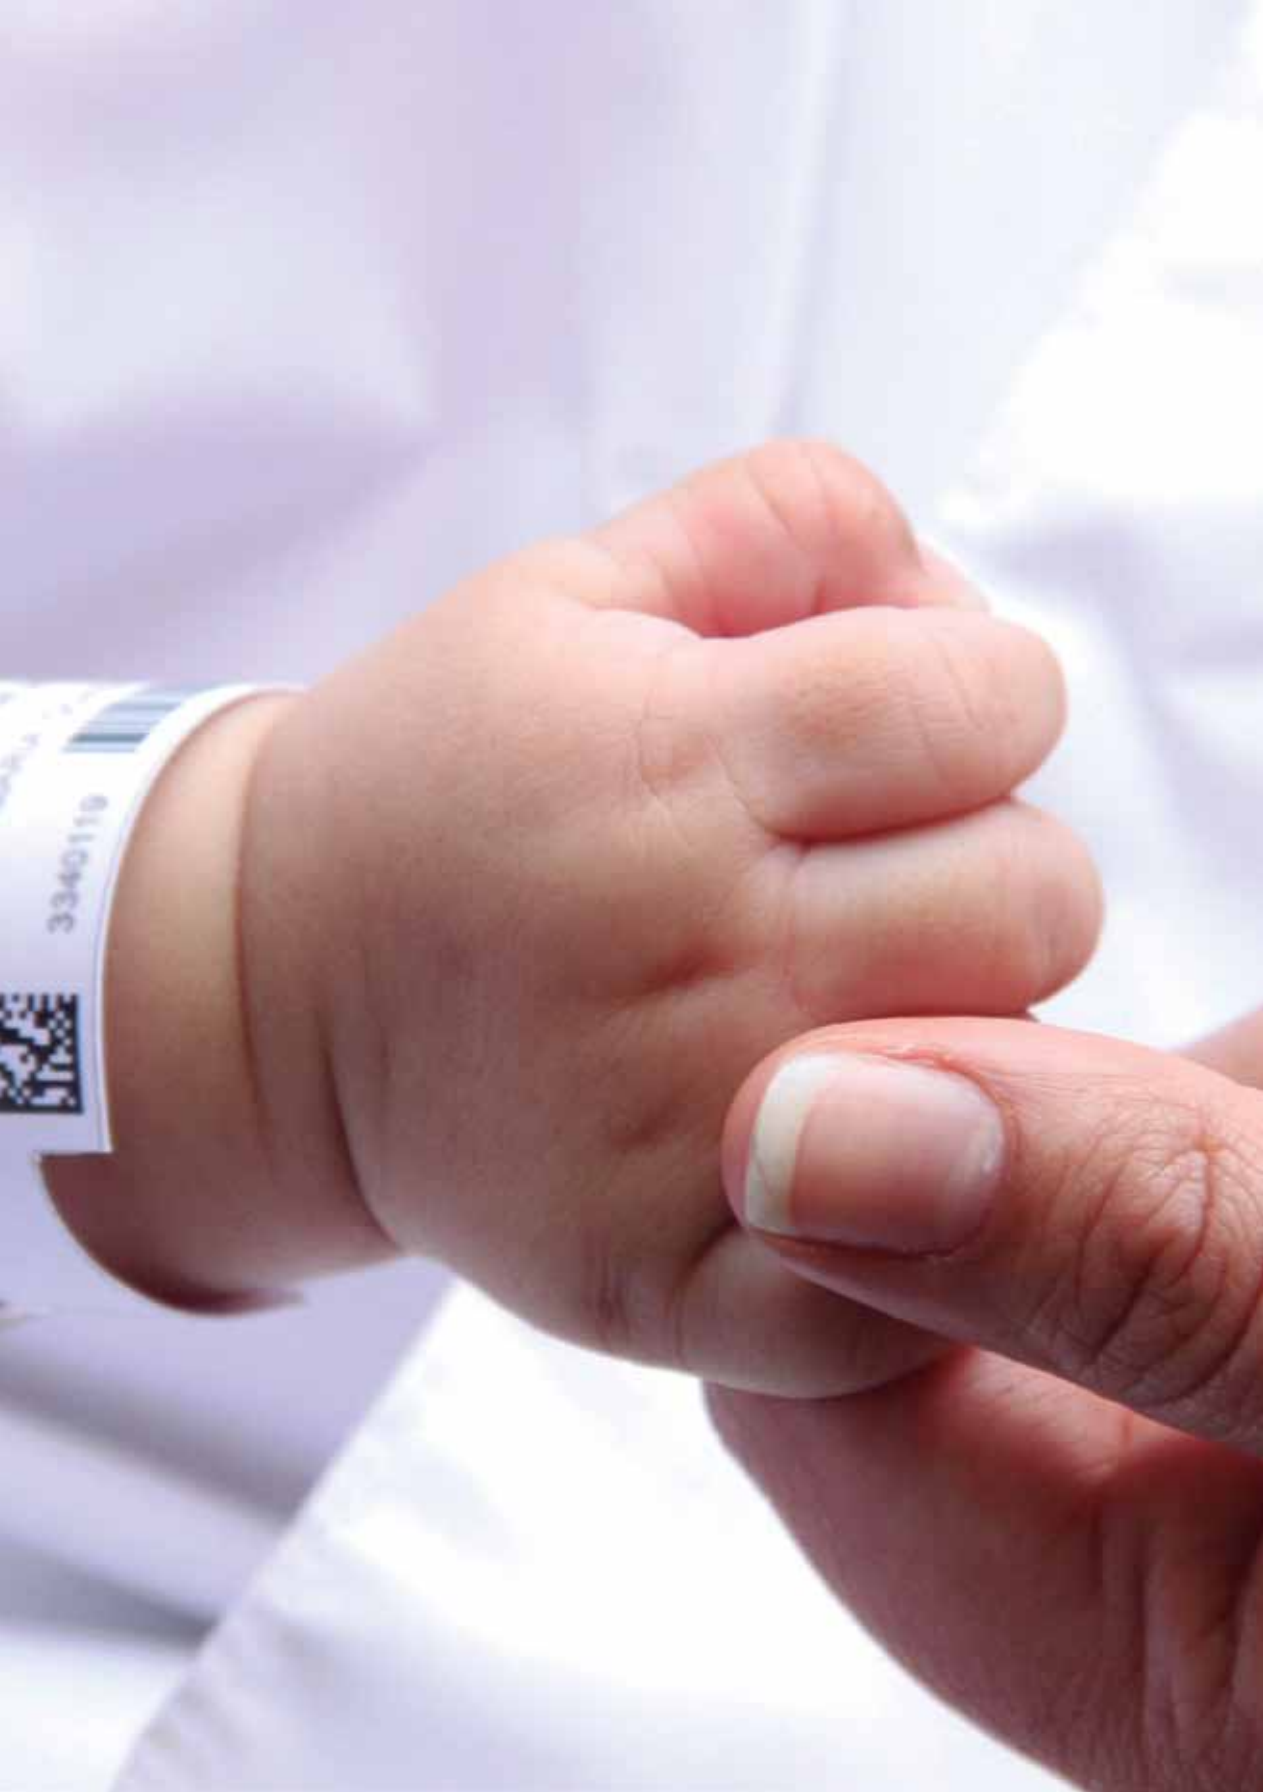

# CAPÍTULO I.

## ASPECTOS DE PROTECCIÓN DEL DERECHO FUNDAMENTAL A LA SALUD

### 1. CRITERIOS DECISORIOS ADOPTADOS POR LA HONORABLE CORTE CONSTITUCIONAL EN 2014

La Corte Constitucional, durante 2014, continuó con la implementación de criterios de interpretación, para la efectiva protección del derecho fundamental de la salud, a través de las distintas sentencias de tutela que revisa. Por tal motivo, se enunciará a continuación, algunas que pueden orientar a los usuarios y demás integrantes del sistema para exigir y defender sus derechos.

#### 1.1. El suministro de medicamentos no registrados ante el INVIMA<sup>1</sup>

La honorable Corte Constitucional ha definido los parámetros en los que se puede autorizar el suministro de medicamentos que no cuenten con registro INVIMA o que no estén incluidos en el POS, y estableció que procede cuando: “i) *la exclusión ha de amenazar verdaderamente los derechos constitucionales fundamentales del afiliado al sistema*, (ii) *el medicamento excluido no pueda ser sustituido por otro con la misma efectividad, que sí esté relacionado en el POS*, (iii) *el paciente no pueda sufragar su costo*, y (iv) *que, por lo general, haya sido prescrito por un médico adscrito a la EPS*”.

Por dichas razones, la Corte ha constituido línea jurisprudencial al respecto, y estableció que en defensa de los derechos fundamentales, prima lo establecido en la Constitución Política, sobre las normas.

#### 1.2. La acción de tutela y los contratos de medicina prepagada<sup>2</sup>

La Ley 100 de 1993 estableció que quienes se encuentran afiliados al régimen contributivo, además de tener derecho a los servicios incluidos en el Plan Obligatorio

1 Colombia. Corte Constitucional. Sentencia T-061 de 2014. Expedientes T-4054261 y T-4055028, acumulados. M.P. NILSON PINILLA PINILLA.

2 Colombia. Corte Constitucional. Sentencia T-126 de 2014. Expedientes T-4.105.103. M.P. LUIS ERNESTO VARGAS SILVA.

de Salud (POS), pueden contratar Planes Adicionales de Salud (PAS), siendo estos: *“un conjunto de beneficios opcionales contratados de manera voluntaria, que garantizan la atención de actividades, procedimientos o intervenciones no incluidas en el POS, o condiciones diferentes o adicionales de hostelería o tecnología”*.

Es de aclarar que, al ser estos servicios privados, de responsabilidad de particulares y financiados con recursos adicionales a las cotizaciones obligatorias, no le corresponde prestarlos al Estado, sin que esto signifique que no pueda ejercer sus funciones de vigilancia y control.

En cuanto a las clases de PAS, existen los denominados planes de atención complementaria en salud (PAC), que comprenden actividades, intervenciones y procedimientos no incluidos en el POS y modalidades de atención diferentes (mayor comodidad, mejor red prestadora, etc.). Asimismo, están los planes de medicina prepagada, regidos por contratos privados, con cláusulas establecidas que se convierten en ley para las partes; y, las pólizas de salud, expedidas por compañías aseguradoras y que se rigen por normas contractuales establecidas en el seguro de salud.

En el caso de los contratos de medicina prepagada, al estar regidos por el derecho privado, en un comienzo no son objeto de protección constitucional, a menos que por la acción u omisión de los particulares que prestan este servicio, se vulneren o amenacen derechos fundamentales, en cuyo caso procede la Acción de Tutela. En tal sentido, la Corte Constitucional ha establecido que en este tipo de contratos, en virtud de los principios de autonomía y buena fe de los contratantes, las empresas que prestan dichos servicios deben garantizar el principio de continuidad de los tratamientos médicos en curso.

Por su parte, la Sentencia T-392/14<sup>3</sup>, recuerda que los contratos de medicina prepagada son contratos bilaterales, de adhesión, de ejecución sucesiva, consensual, principales, aleatorios, que requieren, previo a su celebración, la exigencia por parte de la empresa de la realización de exámenes completos y rigurosos al solicitante, que deben permitir establecer las denominadas preexistencias y exclusiones respecto de las cuales no se dará cubrimiento médico, con la finalidad de que el usuario decida si quiere o no celebrar el contrato. Es de anotar que en este tipo de contratos siempre rige el principio de la buena fe y deben ser aprobados por la Superintendencia Nacional de Salud (SUPERSALUD).

<sup>3</sup> Colombia. Corte Constitucional. Sentencia T-392 de 2014. Expedientes T-4.130.829. M.P. LUIS ERNESTO VARGAS SILVA.

Las preexistencias deben estar establecidas claramente en el contrato o en sus anexos. Sin embargo, la empresa que ofrece el servicio no puede impedir el acceso indiscriminado a todos los demás solo con el argumento de que existe una preexistencia, ya que el hecho de que no se cubra una enfermedad específica, no quiere decir que esta genere la exclusión de todas las enfermedades del usuario.

En conclusión, para que una entidad de medicina prepagada no esté obligada a prestar un servicio de salud, argumentando una preexistencia, lo debió haber establecido médica y científicamente antes de la firma del contrato, con conocimiento del usuario y con su aceptación, pues de lo contrario, debe responder por su cubrimiento. No se pueden establecer preexistencias retroactivas, con suposiciones o verificaciones médicas posteriores y menos unilaterales.

### 1.3. El servicio de transporte en el sistema de salud<sup>4</sup>

La Corte Constitucional ha manifestado reiteradamente que pesar de que el servicio de transporte no es catalogado como una prestación asistencial de salud, su cubrimiento se hace indispensable cuando de este depende la recuperación médica, la vida y la dignidad humana de los pacientes.

El Acuerdo 29 de 2011, que actualizó el POS, estableció que la EPS debe prestar este servicio: *“(i) en ambulancia, para el traslado de pacientes remitidos entre Instituciones Prestadoras de Servicios (IPS) dentro del territorio nacional que requieran de atención de un servicio no disponible en la institución remitora, y (ii) en medio de transporte diferente a la ambulancia cuando sea necesario para acceder a un servicio incluido en el POS no disponible en el municipio de residencia del paciente”*.

En los casos en que los servicios que se requieren deban ser prestados en un lugar distinto a la residencia del usuario, por no contar en su territorio con instituciones en capacidad de prestarlos, son las EPS las obligadas a asumirlos, cuando los pacientes no tiene la capacidad económica de costearlos.

Es de anotar que la EPS tiene la carga de la prueba para determinar la capacidad económica del afiliado, por lo que a este solo le basta la afirmación de carecer de recursos económicos para que dicha entidad deba cubrir los gastos médicos que se requieran.

<sup>4</sup> Colombia. Corte Constitucional. Sentencia T-129 de 2014. Expediente T-4.128.780. M.P. LUIS ERNESTO VARGAS SILVA.

#### 1.4. Allanamiento a la mora en el caso de las incapacidades<sup>5</sup>

Aunque la Corte Constitucional ha afirmado que en principio las controversias surgidas por el pago de acreencias laborales deben ser resueltas por vía de jurisdicción ordinaria o por la SUPERSALUD, a través de las funciones jurisdiccionales asignadas por la Ley 1122 de 2007, la Acción de Tutela procede cuando puede haber una amenaza o vulneración a derechos fundamentales, como cuando se demuestra que el pago requerido por concepto de incapacidad es la única fuente de recursos que le permite al accionante cubrir sus necesidades básicas.

Para dicha corporación, el pago de las incapacidades laborales toma importancia, en cuanto sustituye el salario del trabajador durante el tiempo que está impedido para trabajar y constituye la única fuente presunta de ingreso, con lo que se protegen los principios de dignidad humana e igualdad del trabajador, que en ese momento se encuentra en estado de debilidad manifiesta.

La figura del allanamiento a la mora en materia del pago de incapacidades laborales por enfermedad ha establecido que, si las EPS no actúan de manera oportuna utilizando los mecanismos legales existentes para oponerse al pago de las cotizaciones realizadas de manera extemporánea, no pueden negarse a reconocer y pagar dichas incapacidades alegando esa circunstancia.

La Ley 100 de 1993, y los Decretos 1804 de 1999 y 047 de 2000, han regulado el reconocimiento y pago de incapacidades laborales. El primer decreto estableció que el empleador debió haber cancelado las cotizaciones de manera completa: *“por lo menos durante cuatro (4) meses de los seis (6) meses anteriores a la fecha de causación del derecho”*. El Decreto 047 de 2000 indicó que: *“para acceder a las prestaciones económicas generadas por incapacidad por enfermedad general, los trabajadores dependientes deberán haber cotizado ininterrumpidamente un mínimo de cuatro (4) semanas y los independientes veinticuatro (24) semanas en forma ininterrumpida, sin perjuicio de las normas previstas para el reconocimiento de prestaciones económicas, conforme las reglas de control a la evasión”*. Asimismo, se ha establecido que el empleador que no cumpla con dicha obligación, deberá cancelar las respectivas incapacidades.

En cuanto a las cotizaciones realizadas de forma extemporánea, la Corte ha establecido que no pueden ser obstáculo para que el afiliado que necesita de dicho reconocimiento pueda acceder a él, ya que esta circunstancia puede generar la vulneración de derechos fundamentales.

<sup>5</sup> Colombia. Corte Constitucional. Sentencia T-138 de 2014. Expediente T-4120879. M.P. NILSON PINILLA PINILLA.

Por lo anterior, la Corte Constitucional estableció la teoría del allanamiento a la mora, mediante la cual, se le exige a la EPS que para trasladar el pago de las incapacidades al empleador o al trabajador independiente, en aquellos casos de pagos no oportunos, previamente dicha entidad debe hacer requerimientos con el fin de obtener el pago de los respectivos aportes y rechazar las siguientes cancelaciones, ya que de lo contrario, si los acepta y no manifiesta inconformidad al respecto, no se puede negar al reconocimiento y pago de las incapacidades generadas. Es decir, no se acepta que una EPS se abstenga de reconocer y pagar incapacidades, si no realizó los respectivos requerimientos de cobro o aceptó las cotizaciones que se realizaron de manera posteriormente.

### 1.5. Los fines funcionales de las cirugías estéticas<sup>6</sup>

A pesar de que las cirugías estéticas están excluidas del POS de manera justificada, es necesario, a través del médico tratante, determinar si la misma es requerida por razones funcionales, reconstructivas y terapéuticas. En tales casos, previas verificaciones del cumplimiento de los requisitos establecidos para el acceso a servicios No POS, se deben autorizar, pues de lo contrario, estarían comprometidos derechos fundamentales. En caso de querer negarlos, es obligatorio para las EPS demostrar lo contrario.

### 1.6. Las reglas establecidas por la Corte Constitucional también se aplican a los regímenes de excepción<sup>7</sup>

La Corte Constitucional ha reiterado que en los casos en que se vulneren derechos fundamentales a un usuario, por la negativa de una EPS de autorizar servicios excluidos del POS, estas están en la obligación de autorizarlos. Para tal efecto, dicha corporación ha establecido los siguientes requisitos: *“(i) que la falta del medicamento o tratamiento excluido por la reglamentación legal o administrativa, amenace los derechos constitucionales fundamentales a la vida o a la integridad personal del interesado (ii) que se trata de un medicamento o tratamiento que no pueda ser sustituido por uno de los contemplados en el Plan Obligatorio de Salud o que, pudiendo sustituirse, el sustituto no obtenga el mismo nivel de efectividad que el excluido del plan, siempre y cuando ese nivel de efectividad sea el necesario para proteger el mínimo vital del paciente (iii) que el paciente realmente no pueda sufragar el costo del medicamento o tratamiento requerido, y que no pueda acceder a él por ningún otro sistema o plan de salud (el prestado a sus trabajadores por ciertas empresas, planes complementarios prepagados, etc.).[:]”*

6 Colombia. Corte Constitucional. Sentencia T-457 de 2014. Expedientes: T-4278211, 4285845, T-4287698. M.P. LUIS ERNESTO VARGAS SILVA.

7 Colombia. Corte Constitucional. Sentencia T-547 de 2014. Expediente T-4.232.180. M.P. LUIS ERNESTO VARGAS SILVA.

*(iv) Que el medicamento o tratamiento haya sido prescrito por un médico adscrito a la Empresa Promotora de Salud a la cual se halle afiliado el demandante”.*

En el caso del régimen especial en salud del magisterio (FOMAG), creado por la Ley 91 de 1989, aunque se rige por sus propios estatutos, también -entre sus objetivos- se estableció la garantía de la prestación de los servicios médicos que requieran los docentes y sus beneficiarios, lo que en la actualidad se hace a través de las distintas IPS vinculadas por la Fiduprevisora S.A.<sup>8</sup>.

En la Guía de atención al usuario establecida para el magisterio, se especifica que: *“Todo lo que no esté expresamente excluido se considera incluido”*, y señala taxativamente lo excluido. Al respecto, la Corte ha indicado que el hecho de que el régimen de salud del magisterio sea excepcional, no lo exonera del cumplimiento de los principios y valores que en materia de salud establece la Constitución Política, por lo que también le son aplicables las reglas jurisprudenciales establecidas para los servicios no POS antes enunciadas.

### 1.7. Del servicio de auxiliar de enfermería y su diferencia con el cuidador<sup>9</sup>

La atención domiciliaria está incluida dentro del plan de beneficios y es una modalidad de servicio de salud no hospitalaria con la finalidad de brindar una solución al problema de salud del paciente en su domicilio, contando con el apoyo de profesionales, técnicos o auxiliares en salud y de la familia.

Normalmente el servicio de cuidador lo prestan personas no profesionales en salud, por lo general, familiares, amigos o personas cercanas, con el fin de estar permanentemente con el paciente para brindarle apoyo emocional y físico en sus actividades básicas. Este servicio no está incluido en el POS.

Sin embargo, la jurisprudencia Constitucional ha establecido la obligación de las EPS de garantizar el servicio de cuidador cuando se cumplen las siguientes circunstancias<sup>10</sup>: *“(i) que efectivamente se tenga certeza médica de que el sujeto dependiente solamente requiere que una persona familiar o cercana se ocupe de brindarle de forma prioritaria y comprometida un apoyo físico y emocional en el desenvolvimiento de*

8 Acuerdo 04 de 2004 y guía de atención al usuario 2012 -2016.

9 Colombia. Corte Constitucional. Sentencia T-568 de 2014. Expedientes T-4.301.339, T-4.302.178, T-4.307.205 y T-4.307.744 (acumulados). M.P. JORGE IVÁN PALACIO PALACIO.

10 Colombia. Corte Constitucional. Sentencia T-154 de 2014. Expedientes T-4.096.964 y T-4.104.955 (acumulados). M.P. LUIS GUILLERMO GUERRERO PÉREZ.

*sus actividades básicas cotidianas, (ii) que sea una carga soportable para los familiares próximos de aquella persona proporcionar tal cuidado, y (iii) que a la familia se le brinde un entrenamiento o una preparación previa que sirva de apoyo para el manejo de la persona dependiente, así como también un apoyo y seguimiento continuo a la labor que el cuidador realizará, con el fin de verificar constantemente la calidad y aptitud del cuidado. Prestación esta que si debe ser asumida por la EPS a la que se encuentre afiliada la persona en situación de dependencia”.*

### 1.8. Derecho de los miembros de las Fuerzas Militares y de la Policía Nacional a obtener una nueva valoración médica<sup>11</sup>

La Corte Constitucional ha establecido que el derecho a obtener una nueva valoración médica para los miembros de las Fuerzas Militares y de Policía Nacional en servicio activo o en retiro, se da cuando estos han resultado lesionados o han adquirido una enfermedad en actividades propias del servicio. En tales casos, las autoridades militares, amparadas en el principio de la buena fe, están en la obligación de ordenar los exámenes y evaluaciones médicas que se requieran para establecer el padecimiento del usuario y su dimensión, haciéndose extensivo a los miembros retirados sin derecho a pensión.

Para la Corte, gozan de protección constitucional aquellas enfermedades de desarrollo progresivo e incierto, eventuales, que pueden o no ocurrir y que no fueron valoradas al momento de clasificar las lesiones y secuelas, y que por su carácter inestable, pueden aumentar la disminución de la capacidad laboral, modificándose el índice para fines indemnizatorios, en cuyos casos, procede una nueva valoración médica cuando: “(i) exista una conexión objetiva entre el examen solicitado y una condición patológica atribuible al servicio; (ii) dicha condición recaiga sobre una patología susceptible de evolucionar progresivamente; y (iii) la misma se refiera a un nuevo desarrollo no previsto en el momento del retiro”.

Por tal motivo, el carácter irrevocable de los dictámenes del Tribunal Médico-Laboral de Revisión Militar y de Policía es susceptible de valoración en consideración del tipo de patología y su progresivo deterioro, más aún cuando tuvo como origen un hecho del servicio.

<sup>11</sup> Colombia. Corte Constitucional. Sentencia T-590 de 2014. Expediente T- 4326454. M.P. MARTHA VICTORIA SÁCHICA MÉNDEZ.

## 1.9. El Sistema de pagos moderadores y las enfermedades de alto costo como excepción<sup>12</sup>

Aunque el Sistema General de Seguridad Social en Salud contempló estos pagos con la finalidad de ayudar al sostenimiento y racionalización en el uso de los servicios, la Corte Constitucional ha reiterado insistentemente, que bajo ninguna circunstancia los mismos pueden convertirse en barreras de acceso.

Jurisprudencialmente se ha establecido que además de la exoneración explícita prevista en la Ley 100 de 1993 y en el Decreto 260 de 2004, referente a las enfermedades catastróficas, hay lugar a la exención de dicho pago cuando se comprueba que el usuario del servicio de salud, o su familia, no cuenta con recursos económicos suficientes para asumir las cuotas moderadoras, copagos o cuotas de recuperación.

En virtud del concepto de cargas soportables, dicha corporación ha establecido que en aquellos eventos en los que el costo de la prestación del servicio de salud afecte los recursos económicos que permiten cubrir el mínimo vital del afiliado, es posible prescindir de la obligación de aportar dichos pagos, en cuyo caso le corresponde a la entidad de aseguramiento demostrar lo contrario. Es de resaltar que no existe una tarifa legal para demostrar la ausencia de recursos económicos y se presume la buena fe del usuario.

En cuanto a los pacientes con enfermedades denominadas de “alto costo”, sujetos de especial protección constitucional, la Corte Constitucional ha establecido que existe exoneración en la obligación de realizar el aporte de copagos, cuotas moderadoras o cuotas de recuperación, independientemente del régimen al que se encuentre afiliado. Es de anotar que aunque la Resolución 3974 de 2009 establece la clasificación de estas enfermedades, dicha corporación considera que la misma no puede ser considerada como estática ni inmodificable.

## 1.10. El derecho al transporte de los miembros afiliados al subsistema de salud de las Fuerzas Militares<sup>13</sup>

La Corte Constitucional ha reiterado que las entidades de aseguramiento (especiales o no) deberán asumir los gastos de traslado de manera excepcional, con la finalidad de garantizar el derecho a acceder a los servicios de salud que se necesitan cuando: “(i) *el procedimiento o tratamiento debe ser imprescindible para asegurar el*

<sup>12</sup> Colombia. Corte Constitucional. Sentencia T-612 de 2014. Expediente T-4311213. M.P. JORGE IVÁN PALACIO PALACIO.

<sup>13</sup> Colombia. Corte Constitucional. Sentencia T-644 de 2014. Expediente T- 4.310.129. M.P. MARTHA VICTORIA SÁCHICA MÉNDEZ.

*derecho a la salud y la integridad de la persona (ii) el paciente o sus familiares carecen de recursos económicos para sufragar los gastos de desplazamiento y (iii) la imposibilidad de acceder al tratamiento por no llevarse a cabo el traslado genera riesgo para la vida, la integridad física o la salud del paciente, la cual incluye su fase de recuperación”.*

Lo anterior, en garantía del principio de integralidad que rige el sistema de salud, que busca garantizar la continuidad y calidad del tratamiento, y evitar que por cada nuevo servicio que se prescriba, con ocasión a la misma enfermedad, se deba realizar una nueva acción de tutela. Dicho principio incluye el transporte en salud, que atiende el hecho de que toda persona pueda acceder a los servicios de salud a que tiene derecho sin barreras ni obstáculos, más aún cuando se tiene que trasladar a otro lugar, debido a que donde reside no existen instituciones que presten los servicios en salud que se demandan y el paciente no cuenta con recursos para asumir los costos del desplazamiento. Así mismo, se tiene derecho a que se sufrague el traslado de un acompañante, cuando: *“(i) el paciente sea totalmente dependiente de un tercero para su desplazamiento, (ii) requiera atención permanente para garantizar su integridad física y el ejercicio adecuado de sus labores cotidianas y (iii) ni él ni su núcleo familiar cuenten con los recursos suficientes para financiar el traslado”.*

En los casos de los afiliados al sistema de salud de las Fuerzas Militares y de la Policía Nacional, a pesar de que este servicio no se encuentra incluido dentro del plan de atención integral de los afiliados y beneficiarios, está claro que de no autorizarse, se vulnera el derecho fundamental a la salud de sus afiliados, ya que vulnera los principios de continuidad e integralidad en la prestación de los servicios de salud. Sin embargo, por tratarse de un régimen especial de seguridad social en salud, la financiación de estos costos serán a cargo de los recursos propios, establecidos en la Ley 352 de 1997 (Fondo-cuenta del Subsistema de Salud de las Fuerzas Militares y el fondo-cuenta del Subsistema de Salud de la Policía Nacional).

Igualmente, la Corte Constitucional establece que debido a la equivalencia en la financiación de los fondos-cuenta de los Subsistemas de Salud de las Fuerzas Militares y de la Policía Nacional, con el Fondo de Solidaridad y Garantía (Fosyga), no es necesaria la orden de un juez de tutela, para que la Dirección General de Sanidad Militar pueda disponer de dichos recursos.

Por su parte, en la sentencia T- 610 de 2014<sup>14</sup>, la Corte Constitucional reitera que los modelos de atención en salud especiales no pueden ser inferiores en la garantía del derecho a la salud de sus usuarios, que lo establecido en el sistema general de

<sup>14</sup> Colombia. Corte Constitucional. Sentencia T-610 de 2014. Expediente T- 4314819. M.P. JORGE IVÁN PALACIO PALACIO.

salud, y advierte que las reglas de justiciabilidad del derecho a la salud se aplican a todos los sistemas existentes.

En atención a que el sistema especial de salud de las Fuerzas Militares y Policía, solo tiene establecido el traslado de sus pacientes en ambulancias, al atender el concepto de la Corte respecto al transporte, en cuanto determina que no es un servicio médico, sino una prestación que permite el acceso a las atenciones en salud que requiere un usuario, es obligatorio para estos sistemas cubrir dichos gastos, en cuanto el usuario carece de recursos económicos, más aún, cuando los usuarios no pueden asumir cargas administrativas y cuando son niños.

### 1.11. Derecho a la salud de la población reclusa<sup>15</sup>

La Corte Constitucional siempre ha establecido que por la situación específica de la población privada de la libertad, existe una especial relación de sujeción entre esta y el Estado, por lo que solo le habilita el hecho de restringir la libertad y otros derechos, con la única condición que se haga bajo criterios de razonabilidad, utilidad, necesidad y proporcionalidad.

Es así como, los derechos fundamentales de las personas privadas de la libertad han sido divididos en tres (3) categorías; los suspendidos por la pena impuesta (locomoción y libertad física); los restringidos (trabajo, familia) y, los que no pueden ser suspendidos ni restringidos porque tiene íntima relación con la dignidad humana, tal como el derecho a la salud.

Respecto a la protección del derecho a la salud, con ocasión de la problemática que persiste en algunos centros penitenciarios, la Corte le ordenó al INPEC, que en coordinación con las demás entidades del estado, adelanten acciones para constituir un sistema de salud para dicha población. Por tal motivo, se expidió recientemente la Ley 1709 de 2014, que reiteró la garantía en el acceso a la salud de los internos, adicional a lo consagrado en la Ley 1122 de 2007, art. 14, que había establecido su afiliación al Sistema General de Seguridad Social en Salud, reglamentado por el Decreto 1141 de 2009, y modificado por el 2777 de 2010, en el cual se estableció la afiliación de esta población a través del Régimen Subsidiado mediante subsidio total.

Dicho decreto también estableció que los internos afiliados al Régimen Contributivo o regímenes especiales conservarían su afiliación, por lo que dichas entidades

---

<sup>15</sup> Colombia. Corte Constitucional. Sentencia T-662 de 2014. Expediente T- 4.338.953. M.P. LUIS ERNESTO VARGAS SILVA.

serían las responsables de la prestación y pago de los servicios en salud que se requirieran, para lo cual, deberían coordinar con el INPEC lo relacionado a la seguridad.

El principio de continuidad en la prestación de servicios en salud, cuando se presentan traslados excepcionales<sup>16</sup>

En virtud del principio de continuidad, les está prohibido a las EPS realizar actos que interrumpan un tratamiento cuando este pone en peligro derechos fundamentales de sus usuarios.

En los casos en que hay interrupción de un servicio por traslado excepcional de los afiliados de una E.P.S., con ocasión a la revocatoria de la licencia de funcionamiento o por liquidación, el Decreto 055 de 2007 estableció la obligación a la entidad de aseguramiento que se encuentre en esta situación, de comunicarle a la entidad receptora sobre los traslados, con el fin de que dicha entidad implemente las medidas para continuar con los procedimientos de salud que se encuentren pendientes y autorizados, para responder así por la prestación del servicio a partir del momento del traslado.

Conforme a lo anterior, la EPS en proceso de liquidación debe garantizar la continuidad en la prestación del servicio de sus afiliados hasta que el traslado a otra entidad se haga efectivo, y la entidad receptora tiene la obligación de continuar con la prestación de los servicios pendientes y autorizados. En este sentido, siempre que exista una orden previa para la prestación de servicios POS o no POS (en los casos de tutelas), la aseguradora receptora debe asumir la obligación impuesta, sin poder justificar su negativa por no haber sido del proceso de tutela.

### 1.12. Del pago del subsidio por Incapacidad temporal<sup>17</sup>

Este subsidio fue creado con el fin de proteger al trabajador y a su familia cuando, por cuestiones de salud, no pueda ejercer su profesión u oficio.

El Decreto 2463 de 2001 estableció que: previo a la calificación de la invalidez, competencia de las Administradoras de Fondos de Pensiones -AFP (origen común) y de las administradoras de riesgos profesionales -ARL (origen laboral), las EPS tienen la obligación, previo concepto de rehabilitación, de remitir a sus afiliados a las Juntas de Calificación de Invalidez antes del día 150 de la incapacidad temporal.

16 Colombia. Corte Constitucional. Sentencia T-681 de 2014. Expedientes T-4360266 y T-4361120, acumulados. M.P.

JORGE IVÁN PALACIO PALACIO.

17 Colombia. Corte Constitucional. Sentencia T-698 de 2014. Expediente T-4.360.098. M.P. MAURICIO GONZÁLEZ CUERVO.

Asimismo, se estableció la posibilidad de ampliar por parte de las AFP este trámite por 180 días adicionales a los primeros, para un total de 360 días calendario, siempre que exista concepto favorable de rehabilitación, emitido por la EPS, siendo responsabilidad de las AFP, el pago del subsidio equivalente a la incapacidad que venía disfrutando el trabajador. Este pago se debe hacer hasta que el afiliado restablezca su salud o se califique su pérdida de capacidad laboral.

Por su parte, el decreto ley anti trámites estableció el deber de las EPS de emitir concepto favorable de rehabilitación antes del día 120 de la incapacidad temporal, y de remitirlo a la AFP antes del día 150, para que dicha entidad asuma el pago a partir del día 180, e indicó que si la EPS no cumple con dicha obligación, sería esta —con sus propios recursos— la responsable del pago, hasta que emita el respectivo concepto.

### 1.13. De la suspensión de los servicios de salud por mora en el pago de aportes<sup>18</sup>

La Honorable Corte Constitucional ha establecido que la suspensión de los servicios en salud por mora en el pago de aportes se puede presentar en dos casos: cuando los empleadores no realizan el aporte mensual al sistema de salud y cuando el trabajador es independiente y no ha realizado el respectivo pago.

En el primer caso, la corte ha establecido la obligación de las EPS de ejercer el uso del cobro de lo debido, con el fin de garantizar, por una parte, la sostenibilidad del sistema, y por otra asegurar el pago efectivo de los derechos y su continuidad en la prestación. Si no lo hace, se constituye el allanamiento a la mora. Sin embargo, en ningún caso, la no realización de este cobro, puede afectar los derechos del trabajador, más aún cuando se le han descontado las sumas legales para el pago de sus cotizaciones.

Respecto al segundo caso, cuando el afiliado es directamente responsables de efectuar las cotizaciones al sistema, la EPS también puede hacer uso de los mecanismos para realizar el respectivo cobro. Sin embargo, no puede presionar dicho pago a través de acciones como la suspensión de los servicios, ya que se puede vulnerar el derecho fundamental a la salud.

En tales casos, en virtud del principio de continuidad, si el usuario está en tratamiento médico, más aun cuando se trate de enfermedades graves cuya recuperación dependa de la intervención médica constante, ante la imposibilidad de que el afilia-

<sup>18</sup> Colombia. Corte Constitucional. Sentencia T-724 de 2014. Expediente T- 4360625. M.P. MARÍA VICTORIA CALLE CORREA.

do pueda continuar pagando, la EPS tiene la obligación de acompañar al usuario durante el proceso de afiliación a una entidad de aseguramiento del régimen subsidiado, y debe continuar con la prestación de los servicios que se requieran hasta que dicho traslado se haga efectivo.

Se debe tener en cuenta que el derecho que tienen los usuarios en salud a acceder a servicios médicos para tratar una enfermedad no se puede obstaculizar, así exista mora en el pago de las cotizaciones, ya que prevalece el derecho fundamental a la salud, ante trámites administrativos. Siempre se deben garantizar los servicios en salud y luego adoptar las medidas legales establecidas para exigir el cumplimiento de las obligaciones de los afiliados.

#### 1.14. La esterilización quirúrgica en mujeres en condición de discapacidad<sup>19</sup>

La jurisprudencia constitucional ha protegido los derechos sexuales y reproductivos, y el derecho a formar una familia, de las personas en situación de discapacidad, incluidos los menores de edad. Con ocasión de lo anterior, la Corte Constitucional ha manifestado que ante la existencia de medidas menos nocivas a la autonomía personal (intervención quirúrgica), se debe optar por mecanismos no definitivos de anticoncepción que no restrinjan de forma irreversible el ejercicio de los derechos a la autonomía sexual y reproductiva de las mujeres y menores con esta condición.

Existen excepciones en las que se puede aplicar un método irreversible. La primera se presenta cuando el embarazo pone en riesgo la vida e integridad de la menor en condición de discapacidad siempre que: *“dicha decisión sea consentida por la menor, que un grupo interdisciplinario certifique que la misma conoce y comprende las consecuencias de la intervención quirúrgica, que exista un concepto médico interdisciplinario que establezca que la operación es imprescindible para proteger su vida porque no exista otra alternativa; y que, en todo caso, se otorgue autorización judicial para garantizar el respeto de los derechos del menor, con especial énfasis en determinar la posibilidad para consentir o no el procedimiento médico”*.

La segunda, cuando se presenta un grado de discapacidad severa, en la que no exista capacidad para emitir consentimiento futuro, casos en los que según se ha determinado no se atenta contra el derecho a la autonomía del menor, porque este no la puede ejercer, debido a su no comprensión de las implicaciones del procedimiento, ni de su significado. Para estos casos, se debe cumplir con los siguientes requisitos: *“(i) que la solicitud sea presentada por ambos padres –titulares de la patria potestad–; (ii) que exista*

<sup>19</sup> Colombia. Corte Constitucional. Sentencia T-740 de 2014. Expediente T-4.395.361. M.P. LUIS ERNESTO VARGAS SILVA.

*certificación médica interdisciplinaria en la que conste que existe un grado profundo y severo de discapacidad; y (iii) que se autorice el procedimiento por el juez competente, quien en cada caso tomará la decisión que mejor salvaguarde los derechos del menor”.*

Es necesario aclarar que el procedimiento de esterilización no se aplica para los niños en situación de discapacidad menores de 14 años, debido a que se presume que no han adquirido madurez biológica que le permita someterse a este procedimiento.

En relación con los estándares internacionales respecto de los derechos de las personas en situación de discapacidad, se afirma: *(i) se deben adoptar todas las medidas necesarias para reconocer la capacidad plena de las personas en condición de discapacidad para tomar sus propias decisiones, para lo cual se deben utilizar todas las herramientas de apoyo para emitir las (modelo de apoyo a la toma de decisiones), incluida la toma de decisiones en los procedimientos como el de esterilización quirúrgica; (ii) la esterilización puede constituir un acto que vulnera los derechos de las mujeres y niñas en situación de discapacidad, cuandoquiera que, arguyendo razones de salud o consentimiento sustituto de terceras personas, no se consulte su consentimiento; (iii) la esterilización quirúrgica que prescinde del consentimiento informado, puede no resultar en mecanismo de protección, sino en un factor de vulnerabilidad frente a situaciones tales como el abuso sexual; y (iv) el Estado debe adoptar todas las medidas necesarias para reconocer la capacidad plena de las personas en condición de discapacidad para tomar sus propias decisiones, así como otorgar todos los apoyos necesarios para poder emitir las”.*

### 1.15. Traslado de los restos del paciente fallecido<sup>20</sup>

El cónyuge o compañero(a) permanente, los hijos, los padres, los hermanos, los abuelos o los nietos del fallecido, en su orden, pueden disponer de los restos de un cadáver, acción enmarcada en el respeto al cuerpo inerte sin que dicha titularidad se asemeje a la propiedad, configurándose frente a estas personas los derechos a la libertad de cultos y de conciencia en relación con la sepultura del cuerpo.

Para la Corte Constitucional está claro que el culto en las distintas religiones del mundo es un elemento inescindible de la creencia, motivo por el cual, debe ser protegido constitucionalmente. Los actos que impidan injustificadamente el ejercicio de un culto religioso atentan contra los derechos fundamentales a la libertad de cultos y de conciencia.

En cuanto a las familias que no cuentan con recursos económicos para asumir los costos del traslado, exhumación o inhumación de cadáveres, dicha corporación ha

indicado que esta circunstancia no puede ser un obstáculo para el ejercicio de los ritos fúnebres, siendo obligación de los entes municipales su cubrimiento, en virtud a lo establecido en el Decreto 1333 de 1986.

El respeto y la protección del derecho a la libertad de culto se inician al permitir la manifestación de las ceremonias o ritos de muerte.

### 1.16. Régimen del contrato de seguros en caso de accidente<sup>21</sup>

Los contratos de seguros se rigen según lo establecido en los artículos 1036 a 1082 del *Código de Comercio* y de las condiciones particulares que se establecen y que están especificadas en su cubrimiento.

Por su parte, el Decreto 3990 de 2007, en su artículo segundo reglamenta la Subcuenta del Seguro de Riesgos Catastróficos y Accidentes del Tránsito del Fondo de Solidaridad y Garantía (Fosyga); las condiciones de operación del aseguramiento de los riesgos (daños corporales) que se causan a las personas en accidentes de tránsito, en los eventos catastróficos y terroristas; y, las condiciones generales de los seguros cuando se presentan daños corporales en las personas como consecuencia de los accidentes de tránsito (SOAT). Igualmente, establece los derechos de las personas que sufran estos accidentes y el cubrimiento previsto por parte de las aseguradoras.

La norma enunciada establece que las personas que sufran daños corporales con ocasión a accidentes de tránsito ocurridos dentro del territorio nacional tienen derecho a los servicios y prestaciones señalados en el artículo 193 del Estatuto Orgánico del Sistema Financiero y demás normas que lo adicionen o modifiquen, a cargo de la entidad aseguradora que hubiere expedido el SOAT, cuando el vehículo que causó el daño está asegurado; o por la Subcuenta ECAT del Fosyga, para las víctimas de vehículos no asegurados o no identificados. A esta cuenta también tendrán derecho las víctimas de eventos terroristas y catastróficos.

Entre los servicios y prestaciones cubiertos por los seguros de accidente de tránsito están:

- a. Servicios médico-quirúrgicos: se reconoce una indemnización máxima de quinientos (500) salarios mínimos legales diarios vigentes en el momento de la ocurrencia del accidente. En caso de que se requieran servicios de rehabilitación, una vez agotado el límite, la subcuenta ECAT del Fosyga debe asumir, por una sola vez, la reclamación adicional, por un valor máximo equivalente

<sup>21</sup> Colombia. Corte Constitucional. Sentencia T-883 de 2014. Expediente T-4.456.092. M.P. MARTHA VICTORIA SÁCHICA MÉNDEZ.

a trescientos (300) salarios mínimos diarios legales vigentes al momento del accidente.

En los casos de terrorismo o catástrofes naturales, el valor de la indemnización, al momento de la ocurrencia del evento es de ochocientos (800) salarios mínimos legales diarios vigentes. Para las víctimas que requieran asistencia superior a ese monto el Fosyga está en la obligación de contratar un seguro o constituir una reserva especial.

Los servicios médico-quirúrgicos comprenden:

- Atención inicial de urgencias y atención de urgencias;
- Hospitalización;
- Suministro de material médico-quirúrgico, osteosíntesis, órtesis y prótesis;
- Suministro de medicamentos;
- Tratamientos y procedimientos quirúrgicos;
- Servicios de diagnóstico;

Rehabilitación, por una duración máxima de seis (6) meses, salvo lo previsto para el suministro de prótesis.

Cuando las cuentas de los servicios médico –quirúrgicos prestados superen el monto establecido, estos deberán ser asumidos por la EPS a la que se encuentre afiliada la persona o por la ARL cuando se trate de accidentes de tránsito, calificados como accidentes de trabajo.

Respecto a población pobre no asegurada, cuando se superen dichos montos, su atención en salud debe ser asumida por las instituciones prestadoras de servicios públicos o privadas que tengan contrato con la entidad territorial, caso en el cual el usuario debe cancelar la cuota de recuperación respectiva.

Si la persona tiene un Plan Adicional de Salud (PAS), podrá elegir entre la atención que le brinde dicho plan, la póliza SOAT o a la Subcuenta ECAT del Fosyga, según corresponda. En el primer caso, cuando la víctima escoja su atención por el PAS, ni ella ni la entidad que le prestó los servicios puede repetir contra la Subcuenta ECAT, a excepción de los servicios que requiere y que no cubre el PAS.

- b. Indemnización por incapacidad permanente. Equivale máximo a ciento ochenta (180) salarios mínimos legales diarios vigentes a la fecha del evento, de acuerdo con la tabla de equivalencias para las indemnizaciones por

pérdida de la capacidad laboral y con el Manual Único de Calificación de la Invalidez.

- c. Indemnización por muerte de la víctima. Equivale máximo a 600 salarios mínimos legales diarios vigentes aplicables al momento del accidente o evento. La muerte debe darse máximo dentro del año siguiente a la fecha del mismo.
- d. Indemnización por gastos funerarios. Equivale máximo a 150 salarios mínimos legales diarios vigentes al momento de la ocurrencia del accidente o evento, cubiertos por la AFP o por la ARL a la que se encuentre afiliada la persona, por lo que dichas entidades pueden repetir contra el SOAT en los casos en que el accidente de tránsito esté cubierto por dicha póliza.
- e. Indemnización por gastos de transporte y movilización de las víctimas al centro asistencial. Se da desde el sitio de ocurrencia del accidente de tránsito o del evento terrorista o catastrófico a la primera Institución Prestadora de Servicios de Salud (IPS) a donde sea llevada la víctima para efectos de su estabilización, la cual debe ser la más cercana al lugar del accidente.

Esta indemnización corresponde máximo a diez (10) salarios mínimos legales diarios vigentes al momento de la ocurrencia del accidente o del evento.

Es necesario resaltar que el monto de las coberturas enumeradas es para cada víctima. En cuanto a los beneficios de indemnización por incapacidad permanente, por muerte y gastos funerarios sólo estarán a cargo de la Subcuenta ECAT del Fosyga cuando se trate de víctimas de accidentes de tránsito o de eventos terroristas o catastróficos no afiliadas al Sistema de Seguridad Social Integral.

Las tarifas para la atención médica, quirúrgica, farmacéutica y hospitalaria prestada a las víctimas de los accidentes de tránsito y eventos terroristas o catastróficos son las establecidas por el Decreto 2423 de 1996 o las normas que lo modifiquen o sustituyan, de obligatorio cumplimiento para todas las IPS.

Las incapacidades temporales que se generen, deben ser asumidas por la EPS Contributiva a la que esté afiliada la persona, en caso de accidente de origen común; o por la ARL, en caso de accidente de trabajo.

Por su parte, el artículo 6° del Decreto 3990 de 2007 establece la obligación de las aseguradoras de cubrir los gastos asegurados que no hubiesen sido objetados. La compañía aseguradora está obligada a realizar el pago del siniestro dentro del mes siguiente a la fecha en que el asegurado o beneficiario acredite, aun extrajudicialmente, su derecho. Si no lo hace deberá, además de la obligación, pagar la tasa

máxima de interés moratorio vigente para cuando se realice el pago. En estos casos, el asegurado o el beneficiario tienen la opción de demandar perjuicios causados con ocasión a la mora en el pago, en lugar de los intereses.

El contrato de reaseguro no varía el contrato de seguro celebrado entre el tomador y asegurador, y la oportunidad en el pago es el igual al ya mencionado.

En cuanto al suministro de prótesis, aunque el Decreto 3990 de 2007 establece que solamente está cobijado ante eventos terroristas ocasionados por bombas o artefactos explosivos, los causados por combates, ataques y masacres terroristas, la jurisprudencia constitucional en Sentencia T-959 de 2005 estableció la obligación que tienen todas las IPS de proporcionar la atención integral en salud a las víctimas de accidentes de tránsito, lo que incluye el suministro de prótesis. Posición jurisprudencial reiterada en Sentencia T-463 de 2009.

De conformidad con todo lo anterior, se entiende que le corresponde a las empresas aseguradoras garantizar la atención y recuperación integral de las víctimas de accidentes de tránsito, lo que implica restablecer sus condiciones al estado anterior, sin importar que se exceda de los topes establecidos, casos en los que pueden solicitar el reembolso de los excedentes a la cuenta ECAT del Fosyga.

## 2. SENTENCIA C-313 DE 2014

Con la sanción de la Ley Estatutaria en Salud (Ley 1751 de 2015), se consagra en el país la primera Ley Estatutaria para regular un derecho fundamental. Para la Defensoría del Pueblo que estuvo muy pendiente de su trámite, presentando observaciones ante el Congreso de la República y de la Corte Constitucional, algunas de ellas recogidas en su articulado y en la Sentencia C-313 de 2014.

La Ley Estatutaria en Salud –LES– unifica el bloque de constitucionalidad con el marco legal. En adelante, la salud se consagra como un derecho constitucional fundamental autónomo e irrenunciable en lo individual y en lo colectivo, que se presta como un servicio público esencial, que se ejecuta bajo la indelegable dirección, supervisión, organización, regulación, coordinación y control del Estado.

Para la Corte Constitucional, los elementos incluidos por el legislador al momento de caracterizar el derecho a la salud no tienen reparo, advirtiéndose que el acceso a la salud con miras a la promoción, prevención, diagnóstico, tratamiento, rehabilitación, recuperación y paliación implica también el acceso a las facilidades, establecimientos, bienes y condiciones para alcanzar el más alto nivel de salud en consonancia la Observación 14 del Comité de Derechos Económicos Sociales y Culturales.

La Corte Constitucional avaló las características de irrenunciabilidad y autonomía del derecho, así como la titularidad de la garantía fundamental a la salud, no solo en cabeza de sujetos individuales, sino de sujetos colectivos.

Según lo aclaró la Corte Constitucional, no se dará lugar a expedir normas que menoscaben el mecanismo de protección de los derechos fundamentales. Es así como la Acción de Tutela no se debilita, sino que se fortalece como el medio más eficaz para garantizar el derecho fundamental a la salud.

Según lo observado por la Corte Constitucional en la Sentencia C-313 de 2014, cuando declaró la exequibilidad del artículo 5° sobre obligaciones del Estado, en relación con la sostenibilidad fiscal, estableció que:

- La atribución del deber de adoptar mecanismos para la validación del derecho prevista en el literal d)<sup>22</sup> de este artículo no dará lugar a expedir normas que menoscaben el mecanismo de protección de los derechos fundamentales y,

<sup>22</sup> Establecer mecanismos para evitar la violación del derecho fundamental a la salud y determinar su régimen sancionatorio

- La sostenibilidad fiscal a que alude el literal i)<sup>23</sup> del artículo 5, no puede comprender la negación a prestar eficiente y oportunamente todos los servicios de salud debidos a cualquier usuario.

Con ocasión a la integralidad establecida en el artículo 8, la Defensoría del Pueblo advirtió sobre la protección restringida prevista en el párrafo cuando aludía a la financiación exclusiva de los servicios y tecnologías de salud: *“directamente relacionados con el tratamiento y el cumplimiento del objetivo preventivo o terapéutico”*, excluyendo de esta aquellos *“servicios de carácter individual que no estén directamente relacionados con el tratamiento y el cumplimiento del objetivo preventivo o terapéutico”*.

A juicio de esta entidad, la diferenciación así establecida desconocía los precedentes constitucionales, previstos, entre otras, en las sentencias T-1158 de 2001 y T-760 de 2008, y reiterada en la sentencia T-111 de 2013, respecto de la necesaria financiación con recursos del sistema de salud de servicios indispensables para garantizar la accesibilidad e integralidad del derecho fundamental a la salud. Entre estos se incluyen: gastos de traslado, transporte, alojamiento, alimentación y suministro de elementos para el paciente, así como el transporte y traslado de su acompañante en el evento en que este dependa completamente de un tercero y, en todo caso, siempre que ni el paciente ni su núcleo familiar cuenten con los recursos suficientes para financiarlos.

Es por ello que la Corte Constitucional, respecto a lo contenido en el párrafo del artículo 8, determinó que el mismo establecía un elemento restrictivo que de preservarse en el ordenamiento jurídico, amenazaba la garantía efectiva del derecho, y consideró que dichas limitaciones e indefiniciones en el acceso al derecho, debían descartarse, por lo que ordenó su inexequibilidad.

Respecto al artículo 9, sobre los determinantes sociales en salud, el legislador estableció la creación de mecanismos que identificaran situaciones o políticas de otros sectores que tuviesen impacto directo en los resultados en salud y determinara los procesos pertinentes, para que las autoridades del sector salud participaran en la toma de decisiones que conduzcan al mejoramiento de dichos resultados. Lo anterior permite avanzar en la visión intersectorial e interinstitucional de los factores determinantes de la aparición de enfermedades prevenibles que no dependen directamente del sector de la salud, como los sociales, económicos, culturales, nutricionales, ambientales, ocupacionales, habitacionales, de educación y de acceso a los servicios públicos, financiados con recursos diferentes a los destinados al cubrimiento de los servicios de salud.

<sup>23</sup> Adoptar la regulación y las políticas indispensables para financiar de manera sostenible los servicios de salud y garantizar el flujo de los recursos para atender de manera oportuna y suficiente las necesidades en salud de la población.

En el artículo 10, la LES eleva a norma legal estatutaria, con algunas modificaciones, la Carta de Derechos y Deberes de los usuarios de los servicios del SGSSS.

En el artículo 11 de la LES, se establece que la atención de niños, niñas y adolescentes, mujeres en estado de embarazo, desplazados, víctimas de violencia y del conflicto armado, la población adulta mayor, personas que sufren de enfermedades huérfanas y personas en condición de discapacidad, gozarán de especial protección por parte del Estado y, su atención en salud no estará limitada por ningún tipo de restricción administrativa o económica; tema en el cual la Defensoría del Pueblo, a través de sus diferentes delegadas ha venido insistiendo. Al respecto, la Corte manifestó que la atención que se debe brindar a las víctimas de la violencia sexual es de carácter integral y no meramente psicológico o psiquiátrico.

Igualmente, en su artículo 12, la LES establece que el derecho fundamental a la salud también comprende el derecho de las personas a participar en las decisiones adoptadas por los agentes del sistema de salud que lo afectan o interesan, por lo que fortalece la participación ciudadana en las instancias de deliberación, veeduría y seguimiento del Sistema; con lo que supera lo establecido en la Ley 850 de 2003, por medio de la cual se reglamentan las veedurías ciudadanas. Al respecto, la Corte precisó que el listado de prerrogativas prescritas, en favor de la participación de los ciudadanos en las decisiones del sistema de salud, no debe entenderse como una lista taxativa, sino apenas como una enunciación que no puede excluir, dado el carácter expansivo y universal del principio democrático, otro tipo de garantías o actuaciones, pues la lectura restrictiva puede conducir a impedir la realización efectiva del derecho a la participación.

La Ley Estatutaria en Salud también establece que para acceder a servicios y tecnologías de salud no se requiere de ningún tipo de autorización administrativa entre el prestador de servicios y la entidad que cumpla la función de gestión de dichos servicios, respecto a la atención de urgencias, lo que evita el denominado “paseo de la muerte”, que se presenta cuando los pacientes pasan de uno a otro hospital, sin lograr la atención requerida. En este artículo la Corte hizo observaciones que ampliaron el concepto del texto original.

Para la Corporación, en materia de urgencias, no se garantiza el acceso al servicio de salud cuando se establece la posibilidad de oponer cargas administrativas a su prestación, por lo que al establecer, la Ley, el término “atención inicial”, o que al condicionarlo a situaciones que deben ser determinadas por el Ministerio de Salud y Protección Social, se violaba el derecho de acceder a los servicios de salud motivo por el cual, declaró la inexequibilidad de las expresiones “inicial” y “en aquellas circunstancias que determine el Ministro de Salud y Protección Social”.

El concepto hasta hoy vigente del Plan Obligatorio de Salud –POS– como un listado de inclusiones, se termina, para dar paso a la prestación de todos los servicios estructurados sobre una concepción integral de la salud, que incluye promoción, prevención, atención de la enfermedad, rehabilitación y paliación. En adelante, se entenderá que todas las prestaciones están incluidas, con las excepciones expresamente establecidas en el artículo 15 de la Ley Estatutaria en Salud.

Esta ley indica que para establecer el listado de exclusiones, el Ministerio de Salud y Protección Social dispone hasta de dos años. Dicho procedimiento debe ser técnico, transparente y participativo, sin perjuicio de las acciones de tutela que procedan. La nueva concepción de la garantía del derecho fundamental a la salud a través de la prestación de servicios y tecnologías, estructurados sobre una concepción integral de la salud mediante inclusiones implícitas, respresenta, a juicio de la Defensoría del Pueblo, el principal avance en materia de reconocimiento a los usuarios de los servicios de salud.

Asimismo, la LES garantiza la autonomía de los profesionales de la salud para adoptar decisiones sobre el diagnóstico y tratamiento de los pacientes que tienen a su cargo, ejercida en el marco de esquemas de autorregulación, ética, racionalidad y con base en la evidencia científica. La autonomía hace referencia a la libertad que tiene una persona para establecer sus normas personales de conducta, es decir, la facultad para gobernarse a sí, basada en su propio sistema de valores y principios, relacionada con el libre desarrollo de la personalidad y la dignidad humana que consagra la Carta. En ese sentido la autonomía del profesional de la salud irá hasta donde empieza la autonomía del paciente, expresada en virtud del consentimiento debidamente informado.

Según la Sentencia C-239/97, MP Carlos Gaviria: *“El consentimiento del paciente debe ser libre, manifestado inequívocamente por una persona con capacidad de comprender la situación en que se encuentra. Es decir, el consentimiento implica que la persona posee información seria y fiable acerca de su enfermedad y de las opciones terapéuticas y su pronóstico, y cuenta con la capacidad intelectual suficiente para tomar la decisión”*.

Respecto de la autorregulación, la Declaración de Madrid de 1.987 de la Asociación Médica Mundial –AMM–, recomienda:

*“(…), la profesión médica tiene una responsabilidad permanente de autorregulación y no obstante la existencia de otros reglamentos aplicables a los médicos, la profesión médica debe tomar a su cargo la tarea de regular la conducta y actividades profesionales del médico.*

*(...) La AMM insta a los médicos de cada país a establecer, mantener y participar activamente en un sistema de autorregulación. Esta dedicación a una autorregulación efec-*

*tiva es la que finalmente asegurará a la profesión la autonomía para tomar decisiones sobre la atención médica de los pacientes”.*

La LES ordena en el artículo 23 al Gobierno Nacional establecer una Política Farmacéutica Nacional, programática e integral en la que se identifiquen mecanismos de financiación, adquisición, almacenamiento, producción, compra y distribución de los insumos, tecnologías y medicamentos, así como los mecanismos de regulación de precios de medicamentos. Esta política estará basada en criterios de necesidad, calidad, costo-efectividad, suficiencia y oportunidad. Con este artículo, se busca pasar de la política de libertad vigilada de precios de medicamentos a una política de regulación, facilitando así el acceso, la calidad y la oportunidad. Esta política ha sido formulada por el Gobierno con el Documento CONPES 155 de 2012, que, para la Defensoría del Pueblo, avanza en la dirección correcta, con criterios de necesidad, calidad, costo efectividad, suficiencia y oportunidad.

En desarrollo de esta política se han efectuado una serie de actos administrativos, entre los cuales cabe destacar, la Circular 03 de 2013 de la Comisión Nacional de Precios de Medicamentos y Dispositivos Médicos –CNPMDM– (y siguientes), que establece la metodología para el régimen del control directo de precios para los medicamentos que se comercializan en el territorio nacional y la manera de determinar su precio máximo de venta. Igualmente, el Decreto 1782 de 2014 sobre Medicamentos Biotecnológicos establece los requisitos y el procedimiento para las Evaluaciones Farmacológica y Farmacéutica de los medicamentos biológicos en el trámite del registro sanitario, incluida la denominada ruta abreviada de comparabilidad que parte del hecho de que la molécula ya está estudiada. Esta ruta permite caracterizar moléculas al punto que se puede decir si una es similar a la otra mediante un proceso técnico, sin tener que hacer estudios clínicos en humanos. Aplica a medicamentos muy conocidos y con sustancias químicas totalmente caracterizadas.

La Defensoría del Pueblo espera que tanto el Gobierno como el Congreso establecerán la mejor vía para transformar o redefinir el Sistema General de Seguridad Social en Salud (decretos reglamentarios o ley ordinaria), que se adopten a los preceptos y ordenamientos establecidos en la Ley Estatutaria en Salud. Para esta entidad, el principal compromiso de todos los agentes del Sistema de Salud es dar cabal cumplimiento al goce efectivo del derecho fundamental a la salud, dentro del núcleo esencial, los alcances, límites, lineamientos y principios, establecidos en la misma.

La Defensoría del Pueblo estará muy atenta al desarrollo legal y reglamentario de esta Ley, hará seguimiento a su cumplimiento y velará porque se realicen las evaluaciones sobre los resultados de goce efectivo del derecho fundamental a la salud, en función de los elementos esenciales de accesibilidad, disponibilidad, aceptabilidad y calidad.



## CAPÍTULO II.

### DERECHO A LA SEGURIDAD SOCIAL

En Colombia, el derecho a la Seguridad Social está reconocido como fundamental. Los artículos 48 y 49 de la Constitución Política establecen la seguridad social como un derecho irrenunciable, y como un servicio público, obligando al Estado a dirigirla, coordinarla y controlarla. Instrumentos internacionales que reconocen este derecho refuerzan esa protección.

Al respecto, la Corte Constitucional, en reiteradas jurisprudencias, ha establecido que la efectividad del derecho a la seguridad social, aparte de ser fundamental, radica en que no es renunciable y es universal. Asimismo, ha establecido su protección jurisprudencial cuando: *“(i) adquiere los rasgos de un derecho subjetivo; (ii) la falta o deficiencia de su regulación normativa vulnera gravemente un derecho fundamental al punto que impide llevar una vida digna; y (iii) cuando la acción satisface los requisitos de procedibilidad exigibles en todos los casos y respecto de todos los derechos fundamentales”*.

#### 1. SISTEMA GENERAL DE PENSIONES (SGP)

##### 1.1. El Derecho a la pensión en Colombia.

El derecho a la pensión está en conexión con el derecho fundamental al trabajo, con ocasión a la amplia protección que este debe brindar en todas sus formas, tal como lo estable las premisas constitucionales y del Estado Social de Derecho, asegurando un descanso “remunerado” y “digno”, como producto del esfuerzo realizado y prolongado de varios años de trabajo. Es también una prestación económica, resultado de un ahorro forzoso en las cotizaciones al Sistema General de Seguridad Social en Salud, que se hace efectiva cuando la disminución de la capacidad laboral es evidente.

Su finalidad es garantizar los derechos fundamentales a la dignidad humana, el mínimo vital, la seguridad social y la vida digna. Con estas mismas finalidades, existe la pensión por invalidez, que se presenta cuando existe pérdida de la capacidad laboral de las personas que les impide continuar con su labor.

## 1.2. El Derecho pensional en el Plan Nacional de Desarrollo (PND) 2014 - 2018

En materia pensional, el PND estableció un Sistema de Promoción Social –SPS– para garantizar mínimos vitales, para generar y fortalecer las capacidades de la población pobre y vulnerable mediante la promoción de su inclusión social y productiva.

Asimismo, instituye la estrategia de Movilidad Social, que debe fortalecer las políticas públicas en cobertura de empleos formales, lo que busca mejorar la calidad de vida de los ciudadanos, al brindar complementos al ingreso de la población más pobre y vulnerable, y proporcionar transferencias condicionadas a los hogares más pobres y vulnerables (programa Familias en Acción), que tengan niños y niñas menores de quince años. Así se mejoran sus condiciones de vida. Se busca ampliar su cobertura a la zona rural.

Igualmente, el PND determinó que el Ministerio del Trabajo, articuladamente con la Administradora de Pensiones –Colpensiones–, adelanten los mecanismos y acciones para la divulgación del servicio social complementario de los Beneficios Económicos Periódicos (BEPS), y respalde a las personas de escasos recursos para que ahorren para su vejez.

También establece el PND la promoción de la protección a los ingresos en la vejez, y desarrolla una estrategia para reducir los tiempos y para resolver con calidad los reconocimientos de pensiones. Tanto el Ministerio de Trabajo como Colpensiones deben establecer lineamientos y acciones para mejorar los tiempos de respuesta a las solicitudes de reconocimiento, para lo cual deberán dotar a Colpensiones de la capacidad operativa suficiente para atender la demanda de servicios de los ciudadanos, afiliados, empleadores y pensionados, lo que deriva en el fortalecimiento de la infraestructura tecnológica, física y de recurso humano, y en la definición de alternativas para financiar el aumento de capacidad operativa del sistema.

Sin embargo, para la Defensoría del Pueblo la problemática pensional persiste, pese al esfuerzo del Gobierno Nacional de adelantar estrategias para afrontar el problema de desempleo, asociado con los bajos niveles de educación y la ausencia de estrategias eficientes para una cobertura integral. Esto ocasiona que haya mayor población en trabajos informales, disminuye las cotizaciones al Sistema General de Pensiones, y amplía el porcentaje de adultos mayores que no reciben ingresos dignos en su vejez. Igual sucede con las estrategias implementadas respecto a los BEPS, que no han arrojado resultados.

La Defensoría del Pueblo considera que se presentaron fallas desde la entrada de Colpensiones al sistema, ya que dicha entidad debió haber previsto estrategias en los reconocimientos de las indemnizaciones sustitutivas de la pensión de vejez, como fuente eficaz para clasificar y captar masivamente los posibles beneficiarios de los BEPS, y para subsanar la repesa de solicitudes que provenían del ISS.

En definitiva, para la Defensoría, la problemática pensional se da por la baja cobertura y la ineficacia administrativa, a pesar del reconocimiento de las decisiones adoptadas por la Corte Constitucional en los Autos 110, 202 y 320 de 2013, que han permitido a Colpensiones superar, en gran parte, los problemas que presentaba el Régimen de Prima Media, tal y como era manejado por el ISS.

### 1.3. Acciones de la Defensoría del Pueblo.

#### 1.3.1. Seguimiento al proceso del ISS en liquidación

Durante el desarrollo de las actividades en el eje de pensiones, desde el inicio de la operación de Colpensiones y de conformidad a los autos antes enunciados, la Defensoría del Pueblo ha dado a conocer las principales fallas de dicha entidad en el reconocimiento y pago de pensiones, y otras prestaciones, ante las cuales ha presentado recomendaciones para superar los problemas estructurales del régimen de prima media. Entre los problemas denunciados estaban: desconocimiento del derecho de petición y la obligación de responder los mismos de manera oportuna, clara y completa; falta de priorización de solicitudes; fallas en la historia laboral de los afiliados (no contaban con la totalidad de las semanas verdaderamente cotizadas), incumplimiento de fallos de acción de tutela e incumplimiento de sentencias judiciales, entre otros.

Igualmente, esta entidad ha realizado acompañamiento al Instituto de los Seguros Sociales en Liquidación en la entrega de expedientes y otras series documentales a Colpensiones. Es así como con oficio de fecha 10 de abril de 2015, el doctor Felipe Negret Mosquera, mandatario de fiduciaria la Previsora S.A., para actividades poscierre y de entrega del ISS, envía informe N° 22 con corte al 31 de marzo de 2015, en el que da a conocer la terminación del proceso liquidatorio del ISS al 31 de marzo de 2015 y por lo tanto, la extinción de su personería jurídica.

En dicho informe el ISS comunica la entrega de la totalidad de expedientes pensionales identificados por dicha entidad (1.736.598), correspondiente a decisiones tomadas por el ISS como único administrador del régimen de Prima Media.

El informe está dividido en tres partes. La primera indica el resultado final de la entrega de los expedientes pensionales prioritarios digitalizados (360.241), de conformidad con los grupos prioritarios definidos por la sala novena de revisión de tutelas, para que Colpensiones atendiera la represa presentada.

La segunda parte se concentra en la entrega a Colpensiones de los 1.736.598 expedientes pensionales decididos, como resultado de la incorporación de expedientes encontrados en el proceso del fondo acumulado, en las seccionales del ISS y en el procesamiento realizado por THOMAS MTI. De estos, 1.008.968 están incluidos en nómina, el restante aún no.

La tercera parte resume los expedientes correspondientes a otras series documentales, en donde el ISS entregó 8.441.148 documentos.

Por último, el ISS informa que con Decreto 0553 del 27 de marzo de 2015, el Gobierno Nacional adoptó medidas para garantizar la continuidad de los procesos de cobro coactivo, la administración de cuotas partes pensionales del ISS y los demás procesos que venía adelantando la liquidación de la entidad y que deben ser trasladados a otras entidades para su finalización. Fijó el plazo de 3 meses para que la Fiduciaria La Previsora S.A, realizara las actividades de post cierre y entrega al patrimonio autónomo que se constituye de conformidad a lo establecido en la Ley 1105 de 20006, y al fondo pasivo pensional de Ferrocarriles Nacionales de Colombia, que asume la competencia para adelantar procesos de cobro coactivo y la administración de cuotas partes pensionales del ISS empleador, con anterioridad al 28 de septiembre de 2012.

### 1.3.2. Mesas Técnicas

Son reuniones periódicas entre la Defensoría del Pueblo y Colpensiones, con el objetivo principal de realizar seguimiento a las quejas y reclamos interpuestos por los usuarios que acuden a esta Entidad, que actúan como intermediarios.

Durante 2014, se recibió un total de 83 quejas, 419 solicitudes y 238 asesorías, para un total de 740 intervenciones por parte de la Defensoría. Desde que Colpensiones entró en operación se han realizado 23 mesas técnicas, en las que se plantean estrategias ágiles para resolver de manera oportuna las quejas y solicitudes interpuestas por los beneficiarios del régimen de prima media, se abordan temas como el desconocimiento del derecho de petición, se priorizan las solicitudes por fechas de radicación, registro de la totalidad de las semanas cotizadas en el reporte de historial laboral, cumplimiento de los fallos ordinarios, contenciosos y acciones de tutelas. Igualmente, se socializa el mecanismo de corrección de historia laboral y radicación

de las prestaciones y se discuten peticiones específicas y puntuales cuando hay incumplimiento reiterado en la respuesta a las mismas.

#### 1.4. Cartilla “Lo básico que usted debe saber sobre el Régimen de Prima Media con Prestación Definida”

Durante 2014, la Defensoría del Pueblo, publicó la cartilla: *Lo básico que usted debe saber sobre el Régimen de Prima Media con Prestación Definida*, con la cual se busca que los usuarios comprendan de una manera más clara el Sistema General de Pensiones, su funcionamiento y su finalidad, que no es otra que la de proteger al individuo frente a las contingencias de Invalidez, Vejez y Muerte.

En esta cartilla se abordan de manera general, entre otros, los procedimientos ordinarios que el usuario debe conocer para solicitar de manera exitosa y efectiva el reconocimiento y pago de la pensión de vejez.

#### 1.5. Jurisprudencia

##### 1.5.1. Pensión especial de vejez de madre o padre con hijo con discapacidad<sup>24</sup>.

La ley 797 de 2003, que modificó el artículo 33 de la Ley 100 de 1993, estableció en su parágrafo 4, la excepción respecto a los requisitos exigidos para la obtención de la pensión de vejez, entre otros, a la madre trabajadora<sup>25</sup> cuyo hijo menor de 18 años<sup>26</sup> padeciera de invalidez física o mental, debidamente calificada, mientras subsista dicho estado y continúe dependiendo de la madre, en cuyo caso, se otorga el derecho a recibir la pensión especial de vejez a cualquier edad, siempre que haya cotizado al Sistema General de Pensiones, cuando menos el mínimo de semanas exigido en el régimen de prima media para acceder a la dicha pensión. Igualmente, estableció la suspensión de este derecho, si la trabajadora se reincorporaba laboralmente. También consagró que si la madre había fallecido y el padre tenía la patria potestad del

<sup>24</sup> Colombia. Corte Constitucional. Sentencia C-758 de 2014. Expedientes D- 10166 y D-10167. M.P. MARTHA VICTORIA SÁCHICA MÉNDEZ.

<sup>25</sup> Colombia. Corte Constitucional. Sentencia C-989 de 2006. Expedientes D-6317. M.P. ALVARO TAFUR GALVIS. Demanda la constitucionalidad de la restricción expresa a la aplicación del beneficio de la pensión especial de vejez a los padres, pues sólo era extensivo a las madres, lo cual vulneraba la igualdad de trato ante la ley en razón del sexo del padre de familia, en detrimento de los derechos del hijo afectado por su estado de invalidez. Igualmente, La Corte Constitucional consideró que las cotizaciones exigidas para el beneficio de la pensión especial, deben ser realizadas al Sistema General de Pensiones, utilizando como parámetro temporal de medición el de semanas de cotización del Régimen Solidario de Prima Media, pero no queriendo decir con este requisito se excluyen las madres o padres pertenecientes al Régimen de Ahorro individual.

<sup>26</sup> Colombia. Corte Constitucional. Sentencia C-227 de 2004. Expedientes D-6546. M.P. MARCO GERARDO MONROY CABRA. Declaró la inconstitucionalidad de la expresión “menor de 18 años”.

menor inválido, tendría derecho a pensionarse con los requisitos y en las condiciones ya establecidas.

El objetivo de esta pensión especial es generar un beneficio para las madres y los padres con hijos en situación de discapacidad, sin importar si ellos son o no menores de edad, pues resulta relevante la dependencia hacia su progenitor. Por otro lado, crea una medida de discriminación positiva en favor de las personas en situación de discapacidad, pretendiendo contribuir con ello a su efectivo desarrollo, integración en sociedad y adecuada rehabilitación.

Este derecho aplica tanto para afiliados a cualquier régimen pensional, incluidos los regímenes considerados como especiales (magisterio, fuerzas militares y de policía), ya que, con esta pensión se busca, aparte del beneficio que genera la misma para los padres, proteger al hijo con discapacidad, circunstancia igual para los afiliados a cualquier régimen.

En Sentencia T-101 de 2014, la Corte reiteró que la pensión especial de vejez por hijo inválido es una prestación social a la cual se accede cuando se cumple con los siguientes requisitos: *“(i) que la madre o padre de familia de cuyo cuidado dependa el hijo discapacitado (menor o adulto), haya cotizado al sistema general de pensiones cuando menos el mínimo de semanas exigido en el régimen de prima media para acceder a la pensión de vejez; (ii) que la discapacidad mental o física del hijo haya sido debidamente calificada; y (iii) que exista dependencia económica entre quien sufre la discapacidad y el afiliado al Sistema”*.

La Corte ha precisado con relación a la densidad de las cotizaciones exigidas para obtener el derecho, al “mínimo exigido en el régimen de prima media con prestación definida para acceder a la pensión de vejez”, como una referencia, que no puede ser entendida como si se aplicara solamente a los afiliados al régimen de prima media con prestación definida. Lo que se pretendía era precisar con exactitud el número de semanas de cotización que se exigen para acceder al derecho especial, para que guardara correspondencia con los requisitos para acceder a la pensión de vejez, de tal manera que del derecho se pueda gozar solamente cuando el afiliado cumpla con una densidad de cotizaciones suficiente para financiar la pensión.

### 1.5.2. Pensión para víctimas del conflicto armado<sup>27</sup>.

El accionante (Defensor del Pueblo) en ejercicio de la acción pública de inconstitucionalidad, consagrada en los artículos 241 y 242 de la Constitución Política, presentó demanda de inconstitucionalidad, contra los artículos 131 de la Ley 418 de 1997 (parcial), 1 de la Ley 548 de 1999, 1 de la Ley 782 de 2002, 1 de la ley 1106 de

<sup>27</sup> Colombia. Corte Constitucional. Sentencia C-767 de 2014. Expediente D-10145. M.P. JORGE IGNACIO PRETELT CHALJUB.

2006 y 1 (parcial) de la ley 1421 de 2010. Esto, en el entendido de que las víctimas del conflicto armado interno, que sufrieren una pérdida del 50% o más de su capacidad laboral calificada con base en el Manual Único para la calificación de invalidez expedido por el Gobierno Nacional, tendrán derecho a una pensión mínima legal vigente, de acuerdo con lo contemplado en el Régimen General de Pensiones de la Ley 100 de 1993, siempre y cuando carezcan de otras posibilidades pensionales y de atención en salud. Al respecto, sostuvo que de no hacerlo, esta situación implicaba una trasgresión a la prohibición de regresividad de los derechos económicos, sociales y culturales, por cuanto las personas que han perdido su capacidad laboral en razón del conflicto armado y que no tienen otra alternativa para acceder a la pensión, fueron desprotegidas de forma abrupta y les fue recortada, sin justificación alguna, una prestación económica que les permitía hacer frente a sus necesidades básicas.

Informa en su demanda que la Ley 104 de 1993 creó, como parte de los mecanismos de mitigación de la violencia causada por el conflicto armado en el país, una prestación económica consistente en un salario mínimo para aquellas personas que a raíz del conflicto sufrieran una disminución de su capacidad laboral desde un 66% y que no tuvieran otra posibilidad de obtener ingresos económicos. Luego, la Ley 241 de 1995 aumentó esta protección al reducir el porcentaje al 50% de pérdida de capacidad.

Posteriormente, la Ley 418 de 1997 derogó la 104 de 1993, pero también consagró la pensión de incapacidad como consecuencia del conflicto armado, y estableció tres condiciones para tener derecho a ella: ser víctima del conflicto armado interno, demostrar pérdida de capacidad laboral igual o superior al 50%, y que el beneficiario careciera de otros medios para acceder a una pensión. Igualmente, se estableció una vigencia concreta de dos años, tal cual como había ocurrido con las leyes 104 de 1993 y 241 de 1995, cuya vigencia temporal fue prorrogada por medio de la ley 548 de 1999.

Las leyes 782 de 2002 y 1106 de 2006 extendieron en el tiempo los efectos de las disposiciones de la Ley 418 de 1997, pero no hicieron alusión al artículo que consagraba la pensión por incapacidad a consecuencia del conflicto armado. A partir del 2002 la prestación dejó de reconocerse con el argumento de que la norma que la establecía no tenía vigencia, porque a partir de 2005 con el Acto Legislativo 01, habían desaparecido los regímenes especiales.

Al respecto y al adoptar la decisión, la Corte concluyó que la omisión generada por la Ley 418 de 1997 generó un vacío normativo, al dejar fuera del ordenamiento jurídico la prestación reconocida a las víctimas del conflicto armado, al no haber prorrogado la vigencia de la prestación de las víctimas de la violencia del conflicto armado, en los artículos 1 de la Ley 1106 de 2006 y 1 de la Ley 1421 de 2010, por lo que declaró su

exequibilidad, en el entendido de que las víctimas del conflicto armado interno, que sufrieran una pérdida del 50% o más de su capacidad laboral calificada con base en el Manual Único para la calificación de invalidez expedido por el Gobierno Nacional, tendrán derecho a una pensión mínima legal vigente, de acuerdo con lo contemplado en el Régimen General de Pensiones de la Ley 100 de 1993, siempre y cuando carezcan de otras posibilidades pensionales y de atención en salud.

### 1.5.3. Pensión Gracia<sup>28</sup>

La pensión gracia es una prestación especial (pensión de jubilación vitalicia) establecida en la Ley 114 de 1913, en beneficio de los maestros de Escuelas Primarias oficiales que hubieran servido en el magisterio por un término no menor de veinte años, los cuales pueden contarse computando servicios prestados en diversas épocas.

Dicha ley estableció como requisitos para su reconocimiento: *i) haberse conducido con honradez y consagración en los empleos desempeñados; ii) carecer de medios de subsistencia en armonía con su posición social y costumbres; iii) no haber recibido ni recibir actualmente otra pensión o recompensa de carácter nacional. Lo cual no obsta para que un maestro pueda recibir a un mismo tiempo sendas pensiones como tal, concedidas por la Nación y por un Departamento; iv) haber observado buena conducta; v) si es mujer, estar soltera o viuda; vi) haber cumplido cincuenta años, o hallarse en incapacidad por enfermedad u otra causa, de ganar lo necesario para su sostenimiento.*

Posteriormente, las Leyes 116 de 1928, 37 de 1933, y 43 de 1975 fueron ampliando el derecho de reconocimiento de esta pensión a trabajadores del magisterio diferentes a los establecidos en la Ley 114 de 1913.

Por su parte, la Ley 91 de 1989 creó el Fondo Nacional de Prestaciones Sociales del Magisterio y dispuso que el personal docente nacional y nacionalizado, y el que se vinculara con posterioridad a enero 1° de 1990, se regiría así:

*“A. Los docentes vinculados hasta el 31 de diciembre de 1980 que por mandato de las leyes 114 de 1913, 116 de 1928, 37 de 1933 y demás normas que las hubieran desarrollado o modificado, tuviesen o llegaren a tener derecho a la pensión de gracia, se les reconocerá siempre y cuando cumplan con la totalidad de los requisitos. Esta pensión seguirá reconociéndose por la caja nacional de previsión social conforme al Decreto 081 de 1976 y será compatible con la pensión ordinaria de jubilación, aun en el evento de estar ésta a cargo total o parcial de la nación. B. Para los docentes vinculados a partir del 1° de enero de 1981, nacionales y nacionalizados, y para aquellos que se nombren*

<sup>28</sup> Colombia. Corte Constitucional. Sentencia T-779/14. Expediente T-4410487. M.P JORGE IGNACIO PRETELT CHALJUB.

*a partir del 1° de enero de 1990, cuando se cumplan los requisitos de Ley, se reconocerá sólo una pensión de jubilación equivalente al 75% del salario mensual promedio del último año. Estos pensionados gozarán del régimen vigente para los pensionados del sector público nacional y adicionalmente de una prima de medio año equivalente a una mesada pensional”.*

Por lo anterior se concluye entonces, que solamente son beneficiarios de la pensión gracia, los docentes que se hubiesen vinculado al sector público antes del 30 de diciembre de 1980.

La Corte Constitucional, con sentencia T-174 de 2005, reconoció al régimen de la pensión gracia como un régimen regulado por disposiciones propias (Leyes 114 de 1913, 116 de 1928 y Ley 37 de 1933), compatible con la pensión general. Estableció que la pensión gracia es un derecho de carácter especial que tiene vida propia o autonomía frente al régimen pensional ordinario, por su condición de derecho adquirido, concedido por el legislador y con el rango de protección constitucional, siendo su reconocimiento directo e independiente de cualquier otra situación.

#### 1.5.4. Pensión de sobrevivientes en el régimen pensional del magisterio<sup>29</sup>

La Corte Constitucional ha permitido la existencia de regímenes especiales de seguridad social sin que con ello se vulnere la igualdad, en la medida en que su objetivo reside, precisamente, en la protección de los derechos adquiridos por los grupos de trabajadores que los cubre. Igualmente, ha reconocido que ocasionalmente una regulación específica puede violar la igualdad al consagrar una discriminación injustificada entre las personas pertenecientes al régimen especial y las del régimen general.

Esto es precisamente lo que sucede en el caso de la pensión de sobrevivientes establecido en el régimen especial del magisterio, que consagra exigencias más gravosas para acceder a ella, ya que se rige con lo establecido en el Decreto 224 de 1972, que exige mínimo dieciocho (18) años de cotización al momento de la muerte del afiliado. En cambio, el artículo 46 de la Ley 100 de 1993 requiere solo cincuenta (50) semanas de cotización dentro de los tres (3) últimos años anteriores a la muerte del afiliado, siendo mucho más favorable este requisito.

Por tal motivo, si se contrasta el régimen de pensión de sobreviviente contenida en la Ley 100 con la del régimen especial de los docentes, se verifica que existe un trato

<sup>29</sup> Colombia. Corte Constitucional. Sentencia T-071 de 2014. Expediente T-3979860. M.P. MARÍA VICTORIA CALLE CORREA.

discriminatorio a la luz de las reglas establecidas por la jurisprudencia para realizar este tipo de comparaciones.

Al respecto, la Corte Constitucional ha establecido que teniendo en cuenta la complejidad de los regímenes de seguridad social (especial y general) que incluyen diversos tipos de prestaciones, donde algunos ofrecen mejores beneficios que otros, dicha corporación ha establecido tres (3) requisitos para verificar si se viola o no el derecho a la igualdad: *“Así las cosas, es posible concluir que existe una discriminación (i) si la prestación es separable y (ii) la ley prevé un beneficio inferior para el régimen especial, sin que (iii) aparezca otro beneficio superior en ese régimen especial que compense la desigualdad frente al sistema general de seguridad social. Sin embargo, en virtud de la especialidad de cada régimen de seguridad social, en principio éste es aplicable en su totalidad al usuario, por lo cual la Corte considera que estos requisitos deben cumplirse de manera manifiesta para que pueda concluirse que existe una violación a la igualdad”*.

Con ocasión de esto, el Consejo de Estado también ha expresado que: *“con base en el principio de favorabilidad, debía privilegiarse aquella interpretación que resulte más protectora de los derechos de los trabajadores y de sus familias, de manera que se aplique el régimen especial cuando este resulte más provechoso para los demandantes, o por el contrario, el régimen general si de allí se deduce una situación más conveniente o beneficiosa, advirtiendo que la aplicación de uno u otro debe ser integral fundado en el principio de inescindibilidad en materia laboral”*. Por tal motivo, en materia de pensión de sobrevivientes para los docentes, se debe aplicar lo establecido en la Ley 100 de 1993 sobre la materia, siempre y cuando se acredite que no se cumple con los requisitos establecidos en el artículo 7° del Decreto 224 de 1972.

Es por ello que cuando una regulación específica vulnera la igualdad, se debe analizar la aplicación de la misma contenida en el régimen general pese a que el beneficiario se rija por el régimen especial, principalmente cuando: *“i) la autonomía y separabilidad de la prestación deben ser muy claras, ii) la inferioridad del régimen especial debe ser indudable y iii) la carencia de compensación al interior del régimen especial debe ser evidente”*.

Con relación al primer requisito, la Corte Constitucional ha determinado que la pensión gracia es de las prestaciones con autonomía propia, separable del conjunto del régimen de pensiones, por su carácter específico y que beneficia de manera concreta a determinadas personas. Es una pensión independiente que no está ligada a otra prestación.

Respecto al segundo requisito, dicha corporación considera que en materia de pensión de sobrevivientes, la exigencia del régimen especial con relación al régimen general, es mayor tal como se comprobó en los requisitos exigidos en las normas antes mencionadas.

Respecto a la carencia de compensación al interior del régimen especial, se debe verificar que no exista otra prerrogativa que tenga por finalidad mejorar la situación de las personas que no pueden acceder a la pensión por no cumplir con los requisitos exigidos. Por tal motivo, esta procede al no haber ningún tipo de indemnización ni la posibilidad de completar el tiempo de cotización, ya que quedarían sin fuente alguna de ingresos las personas que dependían económicamente del docente.

La pensión de sobrevivientes tiene por finalidad proteger a los familiares del afiliado o del pensionado que fallece frente a las contingencias económicas derivadas de su muerte, para evitar así que haya cambios en las condiciones mínimas de su subsistencia.

#### 1.5.5. Pensión de sobrevivientes de hijos inválidos y de la afectación del derecho al mínimo vital<sup>30</sup>

El derecho a la pensión de sobrevivientes surge cuando la persona pensionada (por vejez o invalidez) o el afiliado al sistema fallecen, lo que genera una prestación económica a favor del grupo familiar que dependía del causante. Tiene como objetivo la protección a la familia del pensionado, al otorgarles la prestación que este percibía en vida, permitiéndoles mantener el estatus que gozaban antes del fallecimiento del trabajador. Esta prestación tiene el carácter de fundamental cuando con su ausencia, se afecta el mínimo vital del solicitante.

Con ocasión a ello, la Ley 797 de 2003, que modificó la Ley 100 de 1993, establece como beneficiarios de la pensión de sobrevivientes, entre otros, a los hijos inválidos si dependían económicamente del causante, mientras subsistan las condiciones de invalidez, para lo cual, deben demostrar el parentesco, la condición de invalidez y la dependencia económica con el causante.

Respecto al primer requisito, se prueba con el certificado de registro civil o por indicios suficientes que demuestren la relación filial. Con ocasión al segundo, para considerar que una persona sea inválida, debe haber sido calificada con una pérdida del 50% o más de su capacidad laboral. Sin embargo, también se ha establecido que un juez de tutela puede determinar la invalidez de una persona a través de otros

<sup>30</sup> Colombia. Corte Constitucional. Sentencia T-471/14 de 2014. Expediente T-4.262.854. M.P. LUIS GUILLERMO GUERRERO PÉREZ.

documentos como el dictamen de medicina legal o una sentencia de interdicción, ya que de lo contrario, se desconoce la obligación de prestar protección especial a personas que se encuentran en situación de debilidad manifiesta.

En cuanto al tercer requisito, la Corte ha establecido que la dependencia económica supone la necesidad del auxilio que la persona recibía del causante, de manera que este se convierte en indispensable para asegurar la subsistencia de los beneficiarios. La dependencia económica se establece para cada caso en particular, en razón a la autosuficiencia, que en aras de proteger los derechos fundamentales a la vida, al mínimo vital y a la dignidad humana, depende de la situación personal en la que se encuentra el beneficiario. Esto significa, entre otras cosas, que si el beneficiario recibe ingresos adicionales, pero estos no son suficientes para mantener un mínimo que le permita vivir con dignidad, tiene derecho a que se le reconozca esta pensión.

Para la Corte, el único criterio que se puede utilizar para negar el reconocimiento de esta pensión en una persona con discapacidad, corresponde a que se confirmó la satisfacción plena de las necesidades básicas del interesado, al establecerse que su ingreso es suficiente para satisfacerlas y para mantener una subsistencia digna.

#### 1.5.6. Régimen jurídico de la Pensión de Invalidez de origen común<sup>31</sup>

La pensión de invalidez puede generarse por enfermedades o accidentes, de origen común o profesional.

Con ocasión a las primeras, la Ley 860 de 2003 estableció que tienen derecho a la pensión, las personas que sufran una pérdida de capacidad laboral igual o superior al cincuenta por ciento (50%) y que hayan cotizado cincuenta (50) semanas en los tres (3) años anteriores a la fecha de estructuración de la invalidez.

La pérdida de la capacidad laboral se establece por medio de una calificación que realizan las entidades autorizadas por la ley, en la que se determina la condición de la persona, determinándose un porcentaje global de pérdida, su origen y la fecha de estructuración.

La fecha de estructuración de la invalidez es aquella desde la cual se genera en el individuo una pérdida en su capacidad laboral en forma permanente y definitiva, documentada en la historia clínica, los exámenes clínicos, de ayuda diagnóstica, entre otros, y puede ser anterior a la fecha de la calificación.

<sup>31</sup> Colombia. Corte Constitucional. Sentencia T-483/14 de 2014. Expedientes T-4258819. M.P. MARÍA VICTORIA CALLE CORREA.

Para el caso de las enfermedades congénitas, crónicas o degenerativas, se fija en relación con el momento en que se pierde efectivamente la capacidad laboral, ya que son enfermedades cuyos efectos se manifiestan de forma progresiva, por lo que la capacidad se pierde poco a poco, generando incapacidad para proveerse económicamente, así como para continuar cotizando al sistema.

En conclusión, cuando una persona haya nacido con discapacidad y, pese a ello haya laborado y cotizado al sistema por varios años, no puede ser considerada inválida desde su nacimiento, más aún si se confirma que se afilió al sistema de seguridad social en pensiones y que en razón de su capacidad laboral residual aportó al sistema un número relevante de semanas.

Es por ello que, en los casos en que una persona haya nacido con una discapacidad, las entidades encargadas antes de tomar una decisión sobre negar o no la pensión de invalidez, deben examinar el caso, con el fin de evitar discriminaciones injustificadas, para cumplir con el mandato constitucional de promover la igualdad real y efectiva, para la adopción de medidas en favor de grupos discriminados o marginados.

## 2. SISTEMA GENERAL DE RIESGOS LABORALES

### 2.1. Finalidad del Sistema General de Riesgos Laborales (SGRL)

El Sistema General de Riesgos Laborales -SGRL-, constituye uno de los más sentidos avances en materia de seguridad social en Colombia, al disponer la protección del trabajador respecto de los riesgos nacidos de la relación de trabajo.

El SGRL está a cargo de las Administradoras de Riesgos Laborales (ARL), de conformidad a lo establecido en la Ley 1562 de 2012, y tiene como objetivo enfrentar las contingencias propias de un accidente de trabajo o de una enfermedad laboral.

Los empleadores trasladan dichos riesgos a entidades especializadas (ARL) en su administración, mediando una cotización que debe pagar por cada uno de sus trabajadores. Dichas entidades se encargan de brindar a los trabajadores la prestación de los servicios de salud que requieran, así como de asumir el reconocimiento y pago oportuno de las prestaciones económicas (incapacidad temporal, incapacidad permanente parcial, pensión de invalidez, pensión de sobrevivientes, auxilio funerario). Igualmente, deben realizar actividades de prevención, asesoría y evaluación de riesgos laborales; y promover y divulgar programas de medicina laboral, higiene industrial, salud ocupacional y seguridad industrial.

### 2.2. Reglamentación juntas de invalidez

Con el Decreto 1352 de 2013 expedido por el Ministerio del Trabajo se modificó la naturaleza jurídica de las juntas, al ser considerada como organismos del Sistema de la Seguridad Social del orden nacional y adscrito al Ministerio del Trabajo, sujetas al Derecho Privado y a la revisoría fiscal.

Dicho decreto reglamentó, entre otros temas, las relaciones entre las Juntas de Calificación y las entidades que asumen el riesgo de incapacidad, invalidez y muerte, como son las EPS, AFP y ARL, cuando se presenta inconformidad sobre el origen de la invalidez o incapacidad. Igualmente, reglamentó su integración, administración operativa y financiera, los procedimientos para la expedición de dictámenes, su funcionamiento y vigilancia, todo con el fin único de que la determinación (si fue un accidente o una enfermedad) y la calificación de la invalidez fueran realizadas de una manera ágil.

Asimismo, al contar con personería jurídica, dicho decreto determinó que las juntas serían solidariamente responsables de los dictámenes que produzcan perjuicios a los afiliados o a los administradores del Sistema de Seguridad Social Integral.

Para la conformación de las Juntas Nacionales de Calificación, se estableció que el Ministerio de Trabajo realizaría un concurso, en el que se conformaría una lista de cinco elegibles, conformados por tres médicos, un psicólogo y un terapeuta ocupacional, que integrarían dichas juntas, por un periodo de 3 años.

Respecto a las Juntas Regionales, se estableció que serían de dos tipos: A y B, conformadas por dos médicos y un psicólogo, con la exigencia de que dichos profesionales no pueden tener relación de ningún tipo con las entidades implicadas en el objeto de sus funciones.

Igualmente, el decreto estableció para las juntas, entre otras, las siguientes funciones: Asesorar al Ministerio del Trabajo en la actualización del Manual Único de Calificación de la Pérdida de la Capacidad Laboral y Ocupacional, emitir los dictámenes y valoración del paciente, citar a la persona objeto de dictamen para la valoración correspondiente, remitir los informes mensuales al Ministerio del Trabajo, solicitar los antecedentes e informes adicionales, e implementar el sistema de información.

Estipula que el inicio del proceso ante las Juntas Regionales de Calificación lo puede realizar el empleador o el trabajador, cuando después de terminado el proceso de rehabilitación integral, ha transcurrido un mes y aún no ha sido calificado en primera oportunidad; y cuando han transcurrido cinco días –en caso de inconformidad declarada– sin que las entidades de seguridad social remitan el caso ante la Junta.

Se establecen los requisitos para solicitar el dictamen ante las Juntas de Calificación, que varían si se trata de accidente de trabajo, enfermedad laboral o muerte del trabajador, que deben ser entregados por el empleador y las entidades que calificaron en primera oportunidad.

En los casos de apelaciones por decisiones adoptadas por la Junta Regional, la Junta Nacional deberá resolver en un término de cinco días.

### 2.3. Criterios de graduación de las multas por infracción a las normas de seguridad y salud en el trabajo y Riesgos Laborales

Dichos criterios fueron establecidos en el Decreto 472 de 2015, que además de graduar las multas, señala las garantías mínimas para el respeto al derecho fundamental al debido proceso, de quienes están en proceso de investigación administrativa. Igualmente, establece las normas en los casos de clausura de los lugares de trabajo y

la paralización o prohibición inmediata de trabajos o tareas que incumplan con las normas de prevención establecidas en los riesgos laborales, que ponen en peligro la vida, la integridad y la seguridad de los trabajadores.

Este Decreto se aplica para todas las actuaciones administrativas que adelanten los Inspectores del Trabajo y Seguridad Social, las Direcciones territoriales y la Dirección de Riesgos Laborales de dicho ministerio por infracción a las normas de Seguridad y Salud en el Trabajo y de Riesgos Laborales.

El decreto establece los principios que deben interpretar y aplicar las autoridades que regulan las actuaciones y procedimientos, entre los cuales están: debido proceso, igualdad, imparcialidad, moralidad y publicidad, entre otros.

En cuanto al procedimiento administrativo sancionatorio, este se rige por los términos establecidos en el Código Contencioso Administrativo, a excepción de lo establecido en los términos de traslado de la investigación, que para estos casos es de 3 días, y en el traslado de pruebas, que es de 10 días.

El Decreto fija como criterios de graduación de la pena, los siguientes:

- *“La reincidencia en la comisión de la infracción.*
- *La resistencia, negativa u obstrucción a la acción investigadora o de supervisión por parte del Ministerio del Trabajo.*
- *La utilización de medios fraudulentos o de persona interpuesta para ocultar la infracción o sus efectos.*
- *El grado de prudencia y diligencia con que se hayan atendido los deberes o se hayan aplicado las normas legales pertinentes.*
- *El reconocimiento o aceptación expresa de la infracción, antes del decreto de pruebas.*
- *Daño o peligro generado a los intereses jurídicos tutelados.*
- *La ausencia o deficiencia de las actividades de promoción y prevención.*
- *El beneficio económico obtenido por el infractor para sí o a favor de un tercero.*
- *La proporcionalidad y razonabilidad conforme al número de trabajadores y el valor de los activos de la empresa.*
- *El incumplimiento de los correctivos y recomendaciones en las actividades de promoción y prevención por parte de la Administradora de Riesgos Laborales (ARL) o el Ministerio del Trabajo.*

- *La muerte del trabajador”.*

Se establecen los criterios de proporcionalidad y razonabilidad para la cuantía de la sanción a los empleadores, de acuerdo al tamaño de la empresa. En los eventos en que no coincida el número de trabajadores con valor total de los activos, prevalecerá para la aplicación de la sanción el monto total de los activos conforme a los resultados de la vigencia inmediatamente anterior. Es de anotar, que antes del Decreto, dichos montos eran discrecionales; solo existía un máximo impuesto caprichosamente por las autoridades antes mencionadas.

Las sanciones son:

| Tamaño de la Empresa | Número de Trabajadores | Activos totales en SMLMV | Art. 13, Inciso 2 Ley 1562 (de 1 a 500 SMLMV) | Art. 30, Ley 1562 (de 1 a 1000 SMLMV) | Art. 13, Inciso 4 Ley 1562 (de 20 a 1000 SMLMV) |
|----------------------|------------------------|--------------------------|-----------------------------------------------|---------------------------------------|-------------------------------------------------|
|                      |                        |                          | VALOR MULTA EN SMLMV                          |                                       |                                                 |
| Microempresa         | Hasta 10               | <500 SMLMV               | De 1 hasta 5                                  | De 1 hasta 20                         | De 20 hasta 24                                  |
| Pequeña empresa      | De 11 a 50             | 501 a <5.000 SMLMV       | De 6 hasta 20                                 | De 21 hasta 50                        | De 25 hasta 150                                 |
| Mediana empresa      | De 51 a 200            | 100.000 a <610.000 UVT   | De 21 hasta 100                               | De 51 hasta 100                       | De 151 hasta 400                                |
| Gran empresa         | De 201 o más           | <610.000 UVT             | De 101 hasta 500                              | De 101 hasta 500                      | De 401 hasta 1000                               |

Fuente: Decreto 472 de 2015

En los casos de accidentes mortales, no se revisa si es responsabilidad o no del empleador. Cuando los empleadores no cumplen con el requerimiento de informar sobre los accidentes o las enfermedades laborales, se imponen las sanciones máximas previstas.

Asimismo, se establecieron los Planes de Mejoramiento, que pueden ser solicitados por los Inspectores del Trabajo y Seguridad Social, las Direcciones territoriales y la Dirección de Riesgos Laborales de dicho ministerio, con la finalidad de superar situaciones irregulares que se detecten. Una vez presentado, debe dársele cumplimiento de manera completa. De lo contrario, se impondrán las sanciones a que haya lugar.

El cierre de los lugares de trabajo o de las empresas, se puede dar cuando existan condiciones que pongan en peligro la vida, integridad y seguridad personal de los trabajadores. Se podrá hacer cierres de 3 a 10 días hábiles en una primera oportunidad,

si se presenta reiteración de 10 a 30 días y si continúan los hechos que originaron las medidas de cierre, se podrá imponer, mediante auto motivado, por un término de hasta 120 días.

Es de anotar que el Decreto establece que en ningún caso de suspensión de actividades o cierre del lugar de trabajo, se puede ocasionar detrimento a los trabajadores, es decir, continuarán recibiendo los salarios, primas, vacaciones y demás prestaciones sociales a que tienen derecho.

## 2.4. Acciones adelantadas por la Defensoría del Pueblo

En materia de riesgos laborales, la Defensoría Delegada para la Salud, la Seguridad Social y la Discapacidad desarrolló, como parte de sus acciones en promoción y divulgación, en el marco de la serie de derechos de los usuarios en salud y seguridad social, la publicación de la cartilla: *Todo lo que usted debe saber sobre el Sistema General de Riesgos Laborales*.

El contenido de esta cartilla da cuenta de las generalidades del Sistema General de Riesgos Laborales, el plan de beneficios, la cobertura material y en riesgos del trabajo, así como de aquellas propias en materia de seguridad y salud en el trabajo.

La propuesta pedagógica de la cartilla le permite a los ciudadanos conocer las obligaciones y derechos que como trabajadores tienen, y aquellas propias de los empleadores en el Sistema General de Riesgos Laborales, para comprender la calificación de origen y porcentaje de pérdida de la capacidad laboral y las sanciones establecidas para el incumplimiento de las obligaciones del Sistema General de Riesgos Laborales.

## 2.5. Jurisprudencia

### 2.5.1. Determinación del origen de la pérdida de capacidad laboral<sup>32</sup>

La reglamentación sobre riesgos profesionales dispone que cuando ocurre un accidente laboral o una enfermedad profesional, el afiliado tiene derecho a recibir con cargo al sistema, el servicio de salud que requiera, y las prestaciones económicas que se determinen como secuelas de la enfermedad o el accidente, como son: las incapacidades temporales, los subsidios por incapacidad temporal, incapacidad permanente parcial o pensión de invalidez, según la gravedad de la pérdida. En caso de

32 Colombia. Corte Constitucional. Sentencia T-056 de 2014. Expedientes T-4.074.899. M.P. NILSON PINILLA PINILLA.

muerte, los beneficiarios del afiliado tendrán derecho a pensión de sobrevivientes y al auxilio funerario.

Es por ello que para determinar si una persona tiene derecho al reconocimiento de las prestaciones antes enunciadas, se requiere de esta calificación, mecanismo que permite fijar el porcentaje de afectación del individuo en lo físico, mental y social.

En cuanto a la clasificación de la pérdida de capacidad laboral, bien sea por accidente de trabajo o enfermedad profesional, se fijan las mismas reglas y procedimientos establecidos para los casos de riesgo común, lo que indica que la calificación se debe hacer independientemente de la causa que determine la necesidad de dicha valoración.

Por lo anterior, la Corte Constitucional ha calificado la pérdida de capacidad laboral, como un derecho que tiene toda persona, que gana importancia al ser el medio de acceso a la garantía y protección de otros derechos fundamentales como la salud, la seguridad social y el mínimo vital, ya que establece el tipo de prestaciones a las que puede acceder quien ha sufrido de una enfermedad o accidente, producido con ocasión de la actividad laboral, o por causas de origen común.

Dicha calificación no puede generar diferencias en las personas por razón al origen de la misma (profesional o común). Asimismo, dicha valoración puede darse también por novedades que resulten de la evolución de la enfermedad o accidente, o de una situación de salud que pueda tener origen común.

En un primer momento, puede darse la circunstancia de que la afectación no genere incapacidad, pero que con el transcurso del tiempo se presentan secuelas que agravan la situación de salud de la persona, en cuyos casos se requerirá la valoración de la pérdida de capacidad laboral, con el fin de establecer su duración y consecuencias. Por tal motivo, dicha valoración no tiene término perentorio para su ejercicio, ya que depende de las condiciones reales de salud, el grado de evolución de la enfermedad y el proceso de recuperación o rehabilitación en que se encuentre el afiliado.

Por lo anterior, la Corte Constitucional estableció que la afectación de los derechos fundamentales de la persona se presenta por la negación del derecho a la valoración, o por su demora, ya que de no realizarse a tiempo puede generar complicaciones en el estado físico o mental del afiliado.

Por todo lo anterior, se concluye que la negativa de la realización de una valoración de pérdida de capacidad laboral vulnera el derecho a la seguridad social y el acceso a las garantías fundamentales de salud, vida digna y mínimo vital.

### 2.5.2. Estabilidad reforzada laboral a personas con problemas de salud, ocasionados por accidentes de trabajo<sup>33</sup>

Esta protección constitucionalmente establecida, busca garantizar que los contratos de los trabajadores en estado de debilidad manifiesta no se terminen con ocasión a su condición, siendo indiferente el tipo de vinculación contractual laboral con el que cuente.

Es así como, el artículo 13 obliga al Estado a proteger especialmente a personas en circunstancia de debilidad manifiesta. El artículo 47 consagra una política de prevención, rehabilitación e integración social a favor de las personas con limitación física o psíquica. El artículo 54 establece su derecho al trabajo como deber del Estado, que se debe adaptar a las condiciones particulares de la persona y, por último, el artículo 53 se refiere a la igualdad de oportunidades para los trabajadores.

Para que un empleador pueda terminar un contrato cuando el trabajador se encuentra en dichas circunstancias, deberá solicitar autorización al Ministerio del Trabajo, demostrar la causal objetiva de despido y pagar una indemnización de 180 días de salario, tal como lo instituyó la Ley 361 de 1997. Si el despido no cumple con dichos requisitos, será considerado como ineficaz, procediendo el reintegro o la reubicación laboral si se considera necesario, dependiente de las condiciones de salud del trabajador. Igualmente, además de la ineficacia jurídica de su actuación, debe asumir el pago de la respectiva indemnización sancionatoria.

Para dicha la Corte Constitucional el derecho a la estabilidad laboral reforzada como protección constitucional implica: “i) el derecho a conservar el empleo; (ii) a no ser despedido en razón de la situación de vulnerabilidad; (iii) a permanecer en el empleo hasta que se requiera y siempre que no se configure una causal objetiva que conlleve la desvinculación del mismo y; (iv) a que la autoridad laboral competente autorice el despido, con la previa verificación de la estructuración de la causal objetiva, no relacionada con la situación de vulnerabilidad del trabajador, que se aduce para dar por terminado el contrato laboral, so pena que, de no establecerse, el despido sea declarado ineficaz”.

<sup>33</sup> Colombia. Corte Constitucional. Sentencia T-188 de 2014. Expediente T-4144219 y T-4147971 (Acumulados). M.P. LUIS ERNESTO VARGAS SILVA.

En los casos en que los jueces de tutela resuelvan sobre una solicitud de protección en cuyo caso no se ha establecido el grado de discapacidad, su fallo será transitorio, pero si esta ya fue establecida, será definitivo. Esta garantía se predica no solo de trabajadores calificados en invalidez, sino también en aquellos que por su estado de salud, limitación física o psíquica se encuentran con discapacidad o están en excesiva debilidad, lo que impone al juez conceder la petición como mecanismo transitorio, hasta que la autoridad judicial competente tome la decisión respectiva.

### 2.5.3. Reconocimiento y pago de incapacidades laborales<sup>34</sup>

La Corte Constitucional ha reiterado que el reconocimiento de la incapacidad laboral y su remuneración constituyen una garantía para la salud del trabajador y para su derecho al mínimo vital, con el fin de que pueda recuperarse satisfactoriamente, tal como lo exige el principio de la dignidad humana.

Respecto al pago de incapacidades, aunque tiene que ver con la parte económica, la jurisprudencia constitucional ha señalado que su no reconocimiento puede vulnerar derechos fundamentales de los solicitantes, ya que en la mayoría de los casos, esta prestación es la única fuente de ingresos para la atención de sus necesidades básicas y las de su familia.

Por tal motivo, tampoco es de recibo que la EPS se abstengan de reconocer y pagar las incapacidades originadas, así haya mora por parte del trabajador, menos aun cuando no realizó los respectivos requerimientos de cobro o aceptó las cotizaciones realizadas de manera subsiguiente de forma implícita, pues la teoría del allanamiento a la mora no lo permite.

---

<sup>34</sup> Colombia. Corte Constitucional. Sentencia T-195 de 2014. Expediente 4.143.722. M.P. GABRIEL EDUARDO MENDOZA MARTELO.

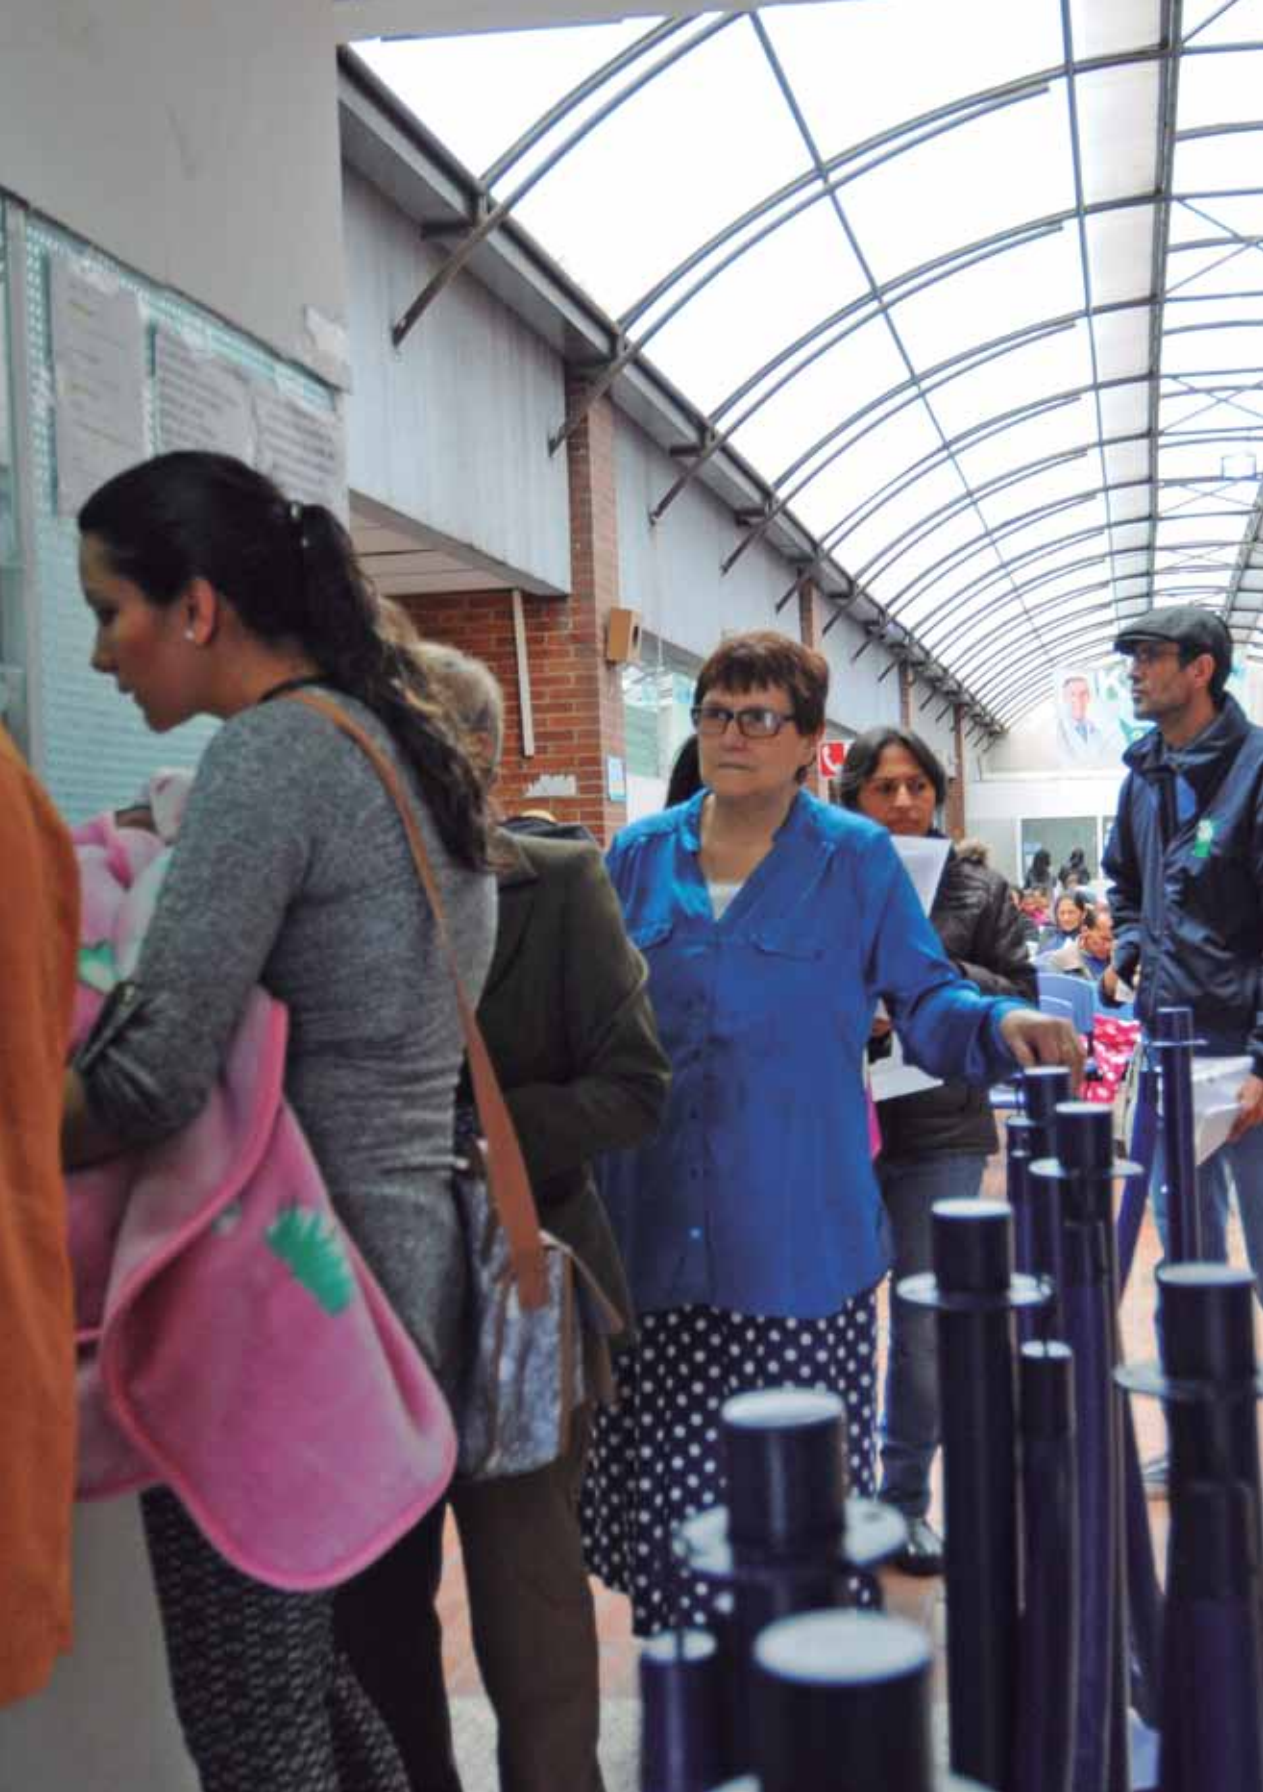

# III. CAPÍTULO

## ANÁLISIS DE LAS TUTELAS INTERPUESTAS EN COLOMBIA EN 2014

### 1. Objetivos

#### 1.1. Objetivo general

Determinar el comportamiento de las tutelas interpuestas en Colombia durante 2014 y verificar las solicitudes más frecuentes en las tutelas que invocan los derechos a la salud y a la seguridad social.

#### 1.2. Objetivos específicos

- Cuantificar el número de tutelas interpuestas en Colombia.
- Determinar los derechos más invocados en las tutelas.
- Identificar las regiones del país donde se interponen más tutelas.
- Establecer la participación de las tutelas que invocan los derechos a la salud y a la seguridad social en el contexto de las tutelas en general.
- Identificar las entidades contra las cuales se interponen el mayor número de tutelas.
- Señalar la orientación judicial de las decisiones en primera instancia.
- Identificar las entidades promotoras de servicios de salud (EPS) que mayor número de tutelas concentran.
- Identificar las entidades con el mayor número de tutelas por violaciones al derecho a la seguridad social.
- Identificar el contenido más frecuente de las tutelas que invocan los derechos a la salud y a la seguridad social.
- Establecer los contenidos del POS y No POS incluidos en las tutelas que invocan el derecho a la salud.
- Identificar los diagnósticos más frecuentes registrados en las Acciones de Tutela para reclamar servicios de salud.

## 2. Aspectos metodológicos

El análisis de la información comprende las acciones de tutelas que llegaron a la Corte Constitucional en 2014 y que fueron enviadas por los distintos Juzgados del país, en cumplimiento del artículo 32 del Decreto 2591 de 1991<sup>35</sup>.

El estudio se divide en tres partes: la primera comprende al análisis comparativo de todas las tutelas interpuestas en el país durante 2014 con el año anterior, en el que se determinan tendencias en el tiempo, derechos invocados, entidades accionadas y lugares donde se interpusieron las mismas.

La segunda se centra en el universo de tutelas que invocaron los derechos a la salud y a la seguridad social en los últimos dos años, además de efectuar un análisis de las variables de la primera fase, se verifican aspectos relacionados con la orientación de las decisiones de los jueces y la identificación de las entidades demandadas.

La última parte comprende un análisis específico de los hechos narrados por los accionantes en las tutelas que invocaron los derechos a la salud y a la seguridad social, sobre muestras independientes para cada derecho.

En el caso del derecho a la salud, inicialmente se hizo un análisis sobre las tutelas que invocaron este derecho, para terminar con un análisis más profundo en los regímenes contributivo y subsidiado, que clasifica las solicitudes de servicios médicos, según si estas estaban en el Plan Obligatorio de Salud –POS– o no. Para dicha clasificación se tuvo en cuenta la normatividad vigente a diciembre de 2014. El análisis fue realizado con base en una muestra representativa de 3.075 tutelas, seleccionadas de aquellas que invocaron el derecho a la salud a través del método de muestreo aleatorio estratificado.

En lo que respecta al derecho a la seguridad social, el análisis fue realizado con base en una muestra representativa de 1.393 tutelas, seleccionadas de aquellas que invocaron el derecho a la seguridad social y no invocaron el derecho a la salud a través del método de muestreo aleatorio estratificado.

La recolección de la información se hizo directamente sobre los expedientes físicos que reposaban en la Corte Constitucional, para lo cual se elaboraron dos (2) fichas

35 Artículo 32. ...el juez, de oficio o a petición de parte, podrá solicitar informes y ordenar la práctica de pruebas y proferirá el fallo dentro de los 20 días siguientes a la recepción del expediente. Si a su juicio, el fallo carece de fundamento, procederá a revocarlo, lo cual comunicará de inmediato. Si encuentra el fallo ajustado a derecho, lo confirmará. En ambos casos, dentro de los diez días siguientes a la ejecutoria del fallo de segunda instancia, el juez remitirá el expediente a la Corte Constitucional, para su eventual revisión.

de recolección (Anexos 1 y 2). La información fue registrada tal como aparecía en los hechos narrados por los accionantes en las tutelas. Se incluyó marca o principio activo, gramaje, concentración y presentación para el caso de los medicamentos, y especificaciones especiales en las otras solicitudes de servicios, de tal manera que se pudiera identificar claramente si se encontraban o no en el POS.

## 2.1. Descripción de las muestras

### 2.1.1. Muestra de las tutelas que invocaron el derecho a la salud

Marco muestral: Tutelas registradas en la base de datos de la Corte Constitucional durante 2014.

Población objetivo: tutelas que durante 2014 invocaron vulneraciones al derecho a la salud.

Modelo de muestreo: Tipo aleatorio estratificado por departamento con asignación proporcional, un nivel de confianza del 95% y un margen de error de 1,37%.

Tamaño de la muestra: 3.075 tutelas.

Unidad de análisis: Tutela en la cual el accionante invocó como derecho vulnerado el derecho a la salud, bien que estuviera solo o en conjunto con otros derechos.

### 2.1.2. Muestra de las tutelas que invocaron el derecho a la seguridad social

Marco muestral: Tutelas registradas en la base de datos de la Corte Constitucional durante 2014.

Población objetivo: tutelas que durante 2014 invocaron vulneraciones al derecho a la seguridad social y no invocaron el derecho a la salud.

Modelo de muestreo: Tipo aleatorio estratificado por departamento con asignación proporcional, un nivel de confianza del 95% y un margen de error de 2,6%.

Tamaño de la muestra: 1.393 tutelas.

Unidad de análisis: Tutela en la cual el accionante invocó como derecho vulnerado el derecho a la seguridad social y no invocó el derecho a la salud.

## 3. Resultados

### 3.1. La tutela en Colombia durante 2014

La cuantificación de las tutelas interpuestas en el año 2014 mostró un total de 498.240 acciones que hacen de esta cifra la más alta desde 1992 (Tabla 1). Su crecimiento con respecto a lo observado en 2013 fue de 43.740 acciones que equivalen al 9,62%, incremento que no se veía desde 2008, fecha en la que intervino la Honorable Corte Constitucional con la Sentencia T-760.

El indicador de número de tutelas por cada 10.000 habitantes se ubicó en 104,54 acciones en 2014, frente a 96,45 de 2013, lo que indica que el ritmo de crecimiento del número de tutelas interpuestas en el país continúa superior al crecimiento poblacional.

La cifra encontrada en 2014, expresa que este año concentró el mayor número de acciones de tutela interpuestas en Colombia desde la creación de esta figura en el artículo 86 de la Constitución Política de 1991.

Al igual que en años anteriores, para esta entidad, el aumento observado se debe en gran parte al reconocimiento de este instrumento como el medio de defensa jurídico más oportuno y eficaz con que cuenta el país.

Tabla 1.  
Registro de tutelas en Colombia  
Periodo 1992-2014

| AÑO   | Nº Tutelas | Crecimiento anual % | Nº de tutelas por cada 10.000 habitantes | Crecimiento anual % |
|-------|------------|---------------------|------------------------------------------|---------------------|
| 1992  | 10.732     |                     | 3,02                                     |                     |
| 1993  | 20.181     | 88,05               | 5,57                                     | 84,48               |
| 1994  | 26.715     | 32,38               | 7,25                                     | 30,03               |
| 1995  | 29.950     | 12,11               | 7,99                                     | 10,28               |
| 1996  | 31.248     | 4,33                | 8,21                                     | 2,70                |
| 1997  | 33.663     | 7,73                | 8,71                                     | 6,15                |
| 1998  | 38.248     | 13,62               | 9,76                                     | 12,03               |
| 1999  | 86.313     | 125,67              | 21,72                                    | 122,56              |
| 2000  | 131.764    | 52,66               | 32,70                                    | 50,52               |
| 2001  | 133.272    | 1,14                | 32,65                                    | -0,14               |
| 2002  | 143.887    | 7,96                | 34,82                                    | 6,62                |
| 2003  | 149.439    | 3,86                | 35,71                                    | 2,57                |
| 2004  | 198.125    | 32,58               | 46,76                                    | 30,95               |
| 2005  | 224.270    | 13,20               | 52,29                                    | 11,82               |
| 2006  | 256.166    | 14,22               | 59,02                                    | 12,86               |
| 2007  | 283.637    | 10,72               | 64,57                                    | 9,41                |
| 2008  | 344.468    | 21,45               | 77,50                                    | 20,01               |
| 2009  | 370.640    | 7,60                | 82,41                                    | 6,34                |
| 2010  | 403.380    | 8,83                | 88,64                                    | 7,56                |
| 2011  | 405.359    | 0,49                | 88,04                                    | -0,68               |
| 2012  | 424.400    | 4,70                | 91,13                                    | 3,51                |
| 2013  | 454.500    | 7,09                | 96,45                                    | 5,84                |
| 2014  | 498.240    | 9,62                | 104,54                                   | 8,38                |
| Total | 4.698.597  |                     |                                          |                     |

Fuente: Corte Constitucional  
Cálculos: Defensoría del Pueblo

### 3.1.1. Los derechos invocados en las tutelas.

En 1.058 municipios se interpuso al menos una tutela por violaciones a uno o más derechos fundamentales (Mapa 1), aumentando en 13 municipios el número observado en 2013 (1.045) (Mapa 2).

Mapa 1.

Derechos más invocados en cada municipio en 2013

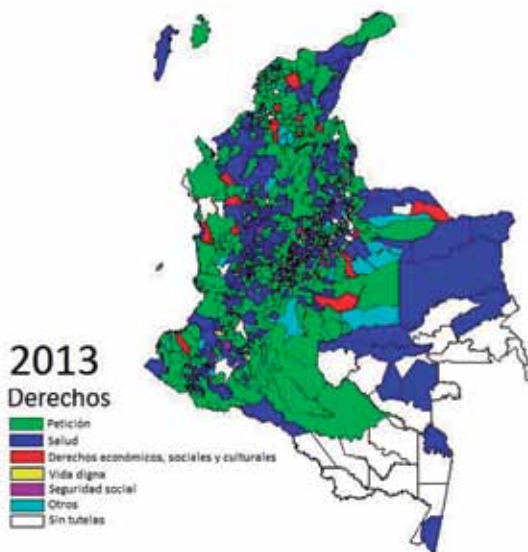

Mapa 2.

Derechos más invocados en cada municipio en 2014

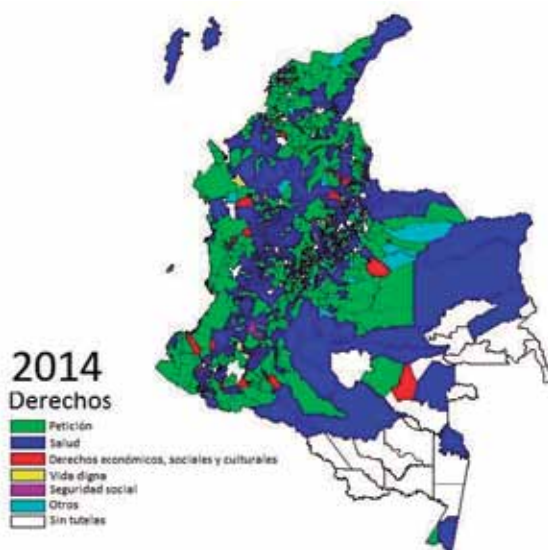

El derecho de petición sigue siendo el más invocado en Colombia (258.504 tutelas), apareciendo en más de la mitad de todas las tutelas que se interponen en el país (51,88%), con un incremento del 18,22% con relación a 2013. En segundo lugar, con 118.281 acciones se encuentran las violaciones al derecho fundamental a la salud, cuya protección fue solicitada en el 23,74% de las acciones incoadas con un incremento del 2,72% en relación con el año anterior. En tercer renglón se encuentra la solicitud de protección a otros derechos económicos, sociales y culturales -DESC- entre los que se incluyen violaciones al mínimo vital, vivienda digna, recreación, propiedad privada, unidad familiar y ayuda humanitaria. Estos derechos presentan una frecuencia de 79.965 tutelas que representan el 16,05%, con un incremento de 11,34%.

El cuarto lugar, lo ocupan los derechos a la vida digna y dignidad humana que en conjunto tienen una participación de 14,55% dentro del total de tutelas, que representa un incremento del 17,68% con relación a 2013.

El derecho a la seguridad social aparece en el quinto lugar y su amparo es solicitado en el 10,85% de las acciones, con un crecimiento del 7,95% (Tabla 2) (Gráfica 1).

Tabla 2.  
Derechos invocados en las tutelas  
Período 2013-2014

|                                                     | 2013       |                       | 2014       |                       | Variación<br>% |
|-----------------------------------------------------|------------|-----------------------|------------|-----------------------|----------------|
|                                                     | Nº Tutelas | Part. en<br>Tutelas % | Nº Tutelas | Part. en<br>Tutelas % |                |
| Petición                                            | 218.656    | 48,11                 | 258.504    | 51,88                 | 18,22          |
| Salud                                               | 115.147    | 25,33                 | 118.281    | 23,74                 | 2,72           |
| Otros derechos económicos,<br>sociales y culturales | 71.820     | 15,80                 | 79.965     | 16,05                 | 11,34          |
| Vida digna y dignidad humana                        | 61.611     | 13,56                 | 72.503     | 14,55                 | 17,68          |
| Seguridad Social                                    | 50.073     | 11,02                 | 54.055     | 10,85                 | 7,95           |
| Debido proceso y defensa                            | 49.813     | 10,96                 | 51.680     | 10,37                 | 3,75           |
| Vida                                                | 26.527     | 5,84                  | 23.785     | 4,77                  | -10,34         |
| Igualdad                                            | 17.253     | 3,80                  | 14.133     | 2,84                  | -18,08         |
| Trabajo                                             | 10.800     | 2,38                  | 10.442     | 2,10                  | -3,31          |
| Libertad de enseñanza, educación,<br>investigación  | 6.129      | 1,35                  | 4.683      | 0,94                  | -23,59         |
| Intimidad, buen nombre y honra                      | 3.814      | 0,84                  | 3.643      | 0,73                  | -4,48          |
| Integridad física                                   | 3.251      | 0,72                  | 3.062      | 0,61                  | -5,81          |
| Personalidad jurídica                               | 1.258      | 0,28                  | 1.212      | 0,24                  | -3,66          |
| Protección al menor y mujer<br>embarazada           | 1.578      | 0,35                  | 1.177      | 0,24                  | -25,41         |
| Derechos colectivos y del medio<br>ambiente         | 1.145      | 0,25                  | 1.150      | 0,23                  | 0,44           |
| Libertad individual                                 | 916        | 0,20                  | 881        | 0,18                  | -3,82          |
| Libertad de asociación                              | 422        | 0,09                  | 490        | 0,10                  | 16,11          |
| Libre desarrollo de la personalidad                 | 554        | 0,12                  | 487        | 0,10                  | -12,09         |
| Derechos políticos                                  | 101        | 0,02                  | 384        | 0,08                  | 280,20         |
| Libertad de expresión e<br>información              | 310        | 0,07                  | 307        | 0,06                  | -0,97          |
| Libertad de locomoción                              | 163        | 0,04                  | 254        | 0,05                  | 55,83          |
| Reparación e Indemnización                          | 98         | 0,02                  | 128        | 0,03                  | 30,61          |
| Libertad de culto                                   | 51         | 0,01                  | 66         | 0,01                  | 29,41          |
| Libertad de escoger profesión u<br>oficio           | 50         | 0,01                  | 63         | 0,01                  | 26,00          |
| Libertad de conciencia                              | 35         | 0,01                  | 34         | 0,01                  | -2,86          |
| Otros                                               | 775        | 0,17                  | 1.032      | 0,21                  | 33,16          |
| TOTAL<br>TUTELAS INTERPUESTAS                       | 454.500    |                       | 498.240    |                       | 9,6 %          |

Fuente: Corte Constitucional  
Cálculos: Defensoría del Pueblo

Como se puede observar en la tabla anterior, en los seis (6) derechos más invocados en las tutelas interpuestas en 2014 se observaron incrementos significativos. El derecho de petición tuvo el más elevado. No obstante, los derechos políticos tuvieron el mayor crecimiento porcentual (280,2%), especialmente por solicitud a participar en el gobierno y ser admitidos en cargos públicos.

En relación con el derecho a la salud su participación en el número total de tutelas disminuyó del 25,33% al 23,74%, aunque las solicitudes absolutas aumentaron en 2,72%, lo que significa que un número mayor de colombianos hicieron uso de esta figura para poder acceder a servicios de salud.

Gráfica 1.  
Derechos más invocados en las tutelas  
Periodo 2003-2014

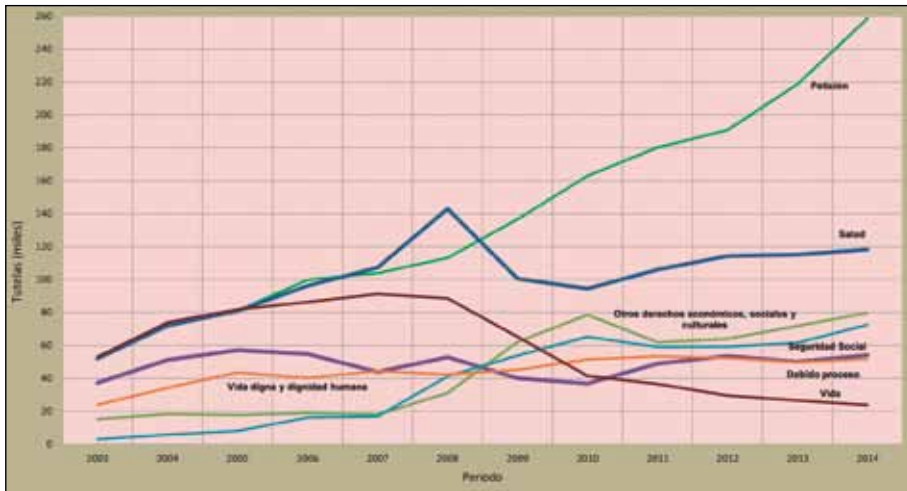

Fuente: Corte Constitucional  
Cálculos: Defensoría del Pueblo

A continuación se hace un análisis de los derechos que fueron invocados en más de 20.000 tutelas durante 2014. Los derechos a la salud y a la seguridad social se analizarán más adelante por ser el eje central de esta investigación.

#### 3.1.1.1. Derecho de petición<sup>36</sup>

La Jurisprudencia Constitucional establece que cuando a una persona no se le responde de la debida manera a su derecho de petición, o este no fue producido o comunicado dentro de los términos que la ley señala, se vulnera su derecho fundamental, con lo que procede la Acción de Tutela como mecanismo de protección, por cuanto no existe en el ordenamiento jurídico colombiano otra forma para hacerlo.

<sup>36</sup> Constitución Política de Colombia. Art. 23: “*Toda persona tiene derecho a presentar peticiones respetuosas a las autoridades por motivos de interés general o particular y a obtener pronta resolución. El legislador podrá reglamentar su ejercicio ante organizaciones privadas para garantizar los derechos fundamentales.*”.

La Corte Constitucional ha reiterado que el derecho de petición es una garantía fundamental de aplicación inmediata, cuya efectividad responde al servicio de la comunidad, así como de los principios, derechos y deberes establecidos en la Constitución Política, para la garantía de la participación de los ciudadanos en todas las decisiones que los afectan.

Por lo anterior, la obligación de la entidad estatal no cesa con la simple resolución del derecho de petición, ya que es necesario que la respuesta dé solución de fondo al asunto que se plantea, con claridad, congruencia y oportunidad. No se entiende cómo las entidades continúan ignorando las peticiones de los ciudadanos o dando respuestas en forma inoportuna o incongruente, generalmente mediante el uso de formatos generales. En consecuencia, entre otras, durante 2014, se interpusieron 258.504 acciones por violaciones a este derecho, cifra que corresponde al 51,88% de las tutelas interpuestas en Colombia, con un incremento del 18,22% en relación con el año anterior y con un favorecimiento del 75,3% en primera instancia hacia los tutelantes.

Igual que en 2013, la principal entidad demandada fue la Unidad para la Atención y Reparación Integral a las víctimas, con 47,8% de estas tutelas, lo que equivale a 123.445 acciones, con un incremento de 80,6% y un nivel de favorecimiento del accionante en primera instancia del 83,3%.

En segundo lugar estuvo el ISS/Colpensiones con 43.756 tutelas (16,9%), disminuyendo su frecuencia en 25,5% con relación a 2013 y un nivel de concesión en primera instancia por parte de los Jueces del 94%.

En una menor proporción, en interposición de tutelas que invocaron el derecho de petición se encuentran las Alcaldías municipales (3,9%), Oficinas de tránsito y similares (2,4%), y Fuerzas militares y de Policía (1,6%).

Los lugares donde se interponen el mayor número de tutelas que invocan este derecho son: Antioquia (43,5%), Bogotá (16,4%), Valle del Cauca (6,1%), Tolima (3,3%) y Caquetá (2,8%). En 974 municipios se interpuso al menos una tutela que invocó el derecho de petición y las ciudades de Medellín (37,8%), Bogotá (16,4%), Cali (4,2%), Ibagué (2,8%) y Florencia (2,6%) se constituyeron como las entidades territoriales con el mayor número de ellas.

### 3.1.1.2. Otros derechos económicos, sociales y culturales

Este grupo de derechos incluyen solicitudes de protección a violaciones al mínimo vital, vivienda digna, recreación, propiedad privada, unidad familiar y ayuda huma-

nitaria. En 2014, los ciudadanos invocaron estos derechos en 79.965 tutelas, equivalentes al 16,05%. En estas solicitudes, los Jueces en primera instancia fallaron a favor de los ciudadanos en el 71,4% de los casos.

La Unidad para la Atención y Reparación Integral a las Víctimas concentra el 51,7% de las estas tutelas, seguido de ISS/Colpensiones (5%) y Coomeva (4,7%). Las regiones con el mayor número de tutelas son: Antioquia (41,7%), Bogotá (11,4%), Valle (7,2%), Caquetá (4,2%) y Santander (3,6%). En 691 municipios se interpuso al menos una tutela y Medellín (34,6%), Bogotá (11,4%), Cali (4,3%), Florencia (3,8%) y Villavicencio (3,4%) fueron las ciudades con las cifras más altas.

### 3.1.1.3. Vida digna y dignidad humana

La dignidad humana, tal como lo ha mencionado la jurisprudencia constitucional, comprende tres objetos concretos de protección: la autonomía o la posibilidad de elegir un plan de vida para desarrollarse según su determinación; la existencia de condiciones físicas que le permitan establecerlas y la no renuncia a los principios de integridad física e integridad moral, es decir, no permitirse vivir con humillaciones. Por tal motivo, la dignidad humana como derecho fundamental implica la correlatividad entre la facultad de exigir su realización en los ámbitos a los que atañe y el deber de propiciarlos. De ahí la importancia de su realización, que debe ser garantizada por el Estado Colombiano, ya que sirve como base para el desarrollo del contenido de otros derechos fundamentales, dispuestos en nuestra Constitución<sup>37</sup>.

De acuerdo con los resultados, la solicitud de protección de este derecho se incrementó en 17,68%, alcanzando la cifra de 72.503 tutelas, de las cuales el 81,5% favorecieron a los accionantes en primera instancia.

El mayor número de tutelas estuvieron dirigidas contra la Unidad para la Atención y Reparación Integral a las Víctimas, con el 15,9%, seguida de Coomeva (9,7%), Nueva EPS (8,6%), SaludCoop (8%), Caprecom (6,4%) y Salud Total (3,4%).

A nivel regional Antioquia concentra el 23,3%, seguida de Bogotá (10,5%), Valle del Cauca (10,2%), Caldas (6%) y Santander (5,8%). En 820 municipios se interpuso al menos una tutela invocando este derecho. Medellín (17,3%), Bogotá (9,8%), Cali (5,7%), Manizales (4,3%) y Bucaramanga (4,1%), constituyen las ciudades con el mayor número de ellas.

<sup>37</sup> Corte Constitucional- Sentencia T-940 /12

#### 3.1.1.4. Debido proceso y defensa

Para la Corte Constitucional, el debido proceso se basa en la existencia de unos procedimientos ya definidos por la ley, con el fin de que se respeten los derechos de los ciudadanos y haya justicia efectiva, por lo que se entiende como el conjunto de garantías previstas por el orden jurídico que buscan proteger al individuo en una actuación judicial o administrativa. El derecho a la defensa es una de esas garantías, que debe ser entendida como la oportunidad que tiene la persona de ser escuchada, de reafirmar sus argumentos, de contradecir las pruebas en su contra y de interponer los recursos a que haya lugar.

La solicitud de protección de este derecho fue invocada en 51.680 tutelas, con un incremento del 3,75%. La favorabilidad en primera instancia fue del 26,6%, una de las más bajas.

El mayor número de tutelas estuvo dirigido contra los juzgados, Cortes y Tribunales (40,8%), seguido de Alcaldías municipales (7,9%), Oficinas de tránsito y similares (6,5%), y el ISS/Colpensiones (4%).

En Bogotá se concentran el mayor número de tutelas (35,1%), seguido de Antioquia (10,9%), Valle del Cauca (8,4%), Atlántico (5,4%) y Santander (5,2%).

En 716 municipios se interpuso al menos una tutela invocando este derecho y las ciudades de Bogotá (35,1%), Medellín (8,2%), Cali (5,7%), Barranquilla (4,7%) y Bucaramanga (3,7%) concentraron el mayor número de ellas.

#### 3.1.2. Lugar de origen de las tutelas

Antioquia con 162.965 tutelas continúa siendo la región donde los ciudadanos hacen mayor uso de esta acción constitucional. La siguen Bogotá (83.087), Valle del Cauca (40.568), Santander (21.375) y Tolima (16.582). Los mayores incrementos porcentuales se observaron en Putumayo (148,87%), Amazonas (44,81%), Caquetá (35,02%), Arauca (29,12%) y Antioquia (27,66) (Tabla 3).

Tabla 3.  
Número de tutelas en Colombia, según Departamento  
Periodo 2013-2014

|                    | 2013       |         | 2014       |         | Variación<br>% |
|--------------------|------------|---------|------------|---------|----------------|
|                    | N° Tutelas | Part. % | N° Tutelas | Part. % |                |
| Antioquia          | 127.660    | 28,09   | 162.965    | 32,71   | 27,66          |
| Bogotá D.C         | 85.687     | 18,85   | 83.087     | 16,68   | -3,03          |
| Valle              | 42.179     | 9,28    | 40.568     | 8,14    | -3,82          |
| Santander          | 20.659     | 4,55    | 21.375     | 4,29    | 3,47           |
| Tolima             | 15.032     | 3,31    | 16.582     | 3,33    | 10,31          |
| Atlántico          | 16.715     | 3,68    | 15.826     | 3,18    | -5,32          |
| Caldas             | 14.806     | 3,26    | 14.519     | 2,91    | -1,94          |
| Norte de Santander | 13.615     | 3,00    | 14.096     | 2,83    | 3,53           |
| Meta               | 9.566      | 2,10    | 11.887     | 2,39    | 24,26          |
| Bolívar            | 10.423     | 2,29    | 11.491     | 2,31    | 10,25          |
| Risaralda          | 10.694     | 2,35    | 11.271     | 2,26    | 5,40           |
| Caquetá            | 7.842      | 1,73    | 10.588     | 2,13    | 35,02          |
| Cesar              | 10.818     | 2,38    | 10.482     | 2,10    | -3,11          |
| Huila              | 8.852      | 1,95    | 9.301      | 1,87    | 5,07           |
| Cauca              | 7.182      | 1,58    | 7.433      | 1,49    | 3,49           |
| Cundinamarca       | 7.365      | 1,62    | 7.139      | 1,43    | -3,07          |
| Magdalena          | 7.487      | 1,65    | 6.954      | 1,40    | -7,12          |
| Córdoba            | 6.121      | 1,35    | 6.366      | 1,28    | 4,00           |
| Quindío            | 5.473      | 1,20    | 6.352      | 1,27    | 16,06          |
| Boyacá             | 5.982      | 1,32    | 6.094      | 1,22    | 1,87           |
| Nariño             | 5.555      | 1,22    | 5.855      | 1,18    | 5,40           |
| Putumayo           | 2.171      | 0,48    | 5.403      | 1,08    | 148,87         |
| Sucre              | 5.129      | 1,13    | 4.665      | 0,94    | -9,05          |
| La Guajira         | 1.953      | 0,43    | 2.026      | 0,41    | 3,74           |
| Chocó              | 1.650      | 0,36    | 1.636      | 0,33    | -0,85          |
| Casanare           | 1.566      | 0,34    | 1.610      | 0,32    | 2,81           |
| Arauca             | 879        | 0,19    | 1.135      | 0,23    | 29,12          |
| San Andrés         | 550        | 0,12    | 589        | 0,12    | 7,09           |
| Amazonas           | 270        | 0,06    | 391        | 0,08    | 44,81          |
| Guaviare           | 277        | 0,06    | 240        | 0,05    | -13,36         |
| Guainía            | 129        | 0,03    | 140        | 0,03    | 8,53           |
| Vichada            | 155        | 0,03    | 131        | 0,03    | -15,48         |
| Vaupés             | 58         | 0,01    | 43         | 0,01    | -25,86         |
| Total              | 454.500    | 100,00  | 498.240    | 100,00  | 9,62           |

Fuente: Corte Constitucional  
Cálculos: Defensoría del Pueblo

En Antioquia, la interposición de tutelas presentó un crecimiento de 27,66%. En 123 municipios al menos se interpuso una tutela por violación a uno o más derechos fundamentales; Medellín con el 80,5% fue la ciudad con el mayor número, seguida de Apartadó (3,4%), Turbo (2,2%), Bello (2,2%), Envigado (1,7%) e Itagüí (1,4%). Con relación al año anterior los mayores incrementos se presentaron en Turbo, Frontino y San Vicente. Los derechos más invocados por los Antioqueños fueron: de petición (69%), otros derechos económicos sociales y culturales (20,5%), salud (14,9%), vida digna y dignidad humana (12%), y seguridad social (6,7%).

Las entidades con más tutelas durante 2014 en Antioquia fueron: La Unidad para la Atención y Reparación Integral a las Víctimas (68,8%), ISS/Colpensiones (8,1%), Coomeva (2,4%), Sura EPS (2%) y Nueva EPS (1,8%). En el 81,1% de los casos los jueces favorecieron a los antioqueños en decisión de primera instancia.

Bogotá, presentó un descenso en el número de tutelas de 3,03%. El derecho de petición (50,9%) es el más invocado, seguido de debido proceso y defensa (21,9%), salud (15,3%), otros derechos económicos sociales y culturales (11%) y seguridad social (9,2%). Sin embargo, hay que destacar el incremento significativo de las tutelas que invocaron violaciones a derechos políticos.

Las entidades con el mayor número de acciones fueron la Unidad para la Atención y Reparación Integral a las Víctimas (16,5%); ISS/Colpensiones (15,7%); Juzgados, Cortes, Tribunales (15,3%); Otros Particulares (6,3%) y los Ministerios (3%). En primera instancia los jueces favorecieron a los bogotanos en el 57% de los casos.

El departamento de Valle del Cauca fue la tercera región con mayor número de tutelas en el país, aunque presentó una disminución de 3,02%. El derecho de petición fue invocado en el 38,9% de las tutelas, seguido del derecho a la salud (33,3%); vida digna y dignidad humana (18,4%); seguridad social (15,8%) y derechos económicos, sociales y culturales (14,2%).

En Cali se presentó el 62,5% de las tutelas de esta región, seguido de Palmira (10,1%), Buga (6,8%), Tuluá (5,5%) y Buenaventura (3,2%). En 42 municipios se interpuso al menos una tutela.

El ISS/Colpensiones, con 16,6%, fue la entidad con el mayor número de acciones, seguida de Coomeva (8,1%), Nueva EPS (6,3%), Servicio Occidental de Salud – SOS (5,9%), y las Alcaldías municipales (5%). En el 69,2% de los casos los jueces favorecieron a los vallecaucanos en primera instancia.

Santander con el 4,29% de las tutelas, se constituyó como la cuarta región con más acciones en el país, presentando un incremento de 3,47% respecto al año anterior. En 83 municipios se interpuso al menos una tutela. Bucaramanga concentró el mayor número de ellas (70,8%). Le siguieron Barrancabermeja (12%), San Gil (4,2%), Socorro (1,8%) y Floridablanca (1,5%). El derecho más tutelado en el departamento fue el de salud, que se invocó en el 37,2% de las acciones, seguido del derecho de petición con 33,7% y -en su orden- vida digna y dignidad humana (19,7%), seguridad social (16,6%) y otros derechos económicos, sociales y culturales (13,4%).

Con relación a las entidades más tuteladas en la región, el ISS/Colpensiones, con el 11,8%, fue la entidad más demandada, seguida de SaludCoop (8,3%), Coomeva (6,4%), Juzgados, Cortes y Tribunales (6,2%); Nueva EPS (5,4%) y Alcaldías municipales (4,9%). En fallo de primera instancia, el 66% favoreció a los santandereanos.

La quinta región que agrupó el mayor número de tutelas en el país fue el Departamento del Tolima con 3,33% y un crecimiento de 10,31% respecto del año anterior. En 47 municipios se interpuso al menos una tutela. Ibagué, con el 80,1%, fue la ciudad con el mayor número de ellas. Le siguieron Espinal (2,9%), Honda (2,6%), Fresno (2,5%) y Líbano (2,2%). El derecho de petición fue el más invocado (50,9%), seguido de salud (27,8%), vida digna y dignidad humana (15%), otros derechos económicos, sociales y culturales (11,5%), debido proceso y defensa (10,1%), y seguridad social (9,9%). En fallo de primera instancia, el 63,9% de ellos favoreció a los tolimenses.

Según el indicador “número de tutelas por cada 10.000 habitantes”, en el país, por cada 10.000 habitantes se interponen 104,54 tutelas, cifra que se incrementó en 8,38% respecto a 2013. Los departamentos de Antioquia, Caquetá, Putumayo, Caldas y Meta mantienen los indicadores más altos (Tabla 4).

Tabla 4.  
Número de tutelas en Colombia por cada 10.000 habitantes  
Según departamento  
Periodo 2013-2014

|                    | 2013                              | 2014                              | Variación % |
|--------------------|-----------------------------------|-----------------------------------|-------------|
|                    | Nº Tutelas X 10.000<br>Habitantes | Nº Tutelas X 10.000<br>Habitantes |             |
| Antioquia          | 202,64                            | 255,51                            | 26,09       |
| Caquetá            | 168,47                            | 224,55                            | 33,28       |
| Putumayo           | 64,41                             | 158,43                            | 145,97      |
| Caldas             | 150,45                            | 147,24                            | -2,13       |
| Meta               | 103,43                            | 126,05                            | 21,87       |
| Risaralda          | 113,61                            | 119,06                            | 4,80        |
| Tolima             | 107,36                            | 118,08                            | 9,99        |
| Quindío            | 97,92                             | 113,01                            | 15,41       |
| Bogotá D.C         | 111,65                            | 106,84                            | -4,31       |
| Norte de Santander | 102,19                            | 104,88                            | 2,63        |
| Santander          | 101,22                            | 104,21                            | 2,96        |
| Cesar              | 107,74                            | 103,12                            | -4,29       |
| Valle              | 93,31                             | 88,84                             | -4,80       |
| Huila              | 78,59                             | 81,55                             | 3,76        |
| San Andrés         | 73,17                             | 77,70                             | 6,20        |
| Atlántico          | 69,56                             | 65,07                             | -6,45       |
| Magdalena          | 60,60                             | 55,75                             | -8,01       |
| Bolívar            | 50,87                             | 55,43                             | 8,98        |
| Sucre              | 61,43                             | 55,33                             | -9,94       |
| Cauca              | 53,01                             | 54,38                             | 2,57        |
| Amazonas           | 36,22                             | 51,87                             | 43,19       |
| Boyacá             | 47,00                             | 47,81                             | 1,73        |
| Casanare           | 45,52                             | 45,97                             | 0,99        |
| Arauca             | 34,27                             | 43,75                             | 27,67       |
| Córdoba            | 36,92                             | 37,81                             | 2,42        |
| Guainía            | 32,09                             | 34,28                             | 6,84        |
| Nariño             | 32,64                             | 33,98                             | 4,11        |
| Chocó              | 33,65                             | 33,04                             | -1,82       |
| Cundinamarca       | 28,35                             | 27,05                             | -4,57       |
| Guaviare           | 25,66                             | 21,92                             | -14,59      |
| La Guajira         | 21,64                             | 21,78                             | 0,64        |
| Vichada            | 22,60                             | 18,65                             | -17,51      |
| Vaupés             | 13,55                             | 9,94                              | -26,59      |
| Índice General     | 96,45                             | 104,54                            | 8,38        |

Fuente: Corte Constitucional, Proyecciones de población DANE  
Cálculo: Defensoría del Pueblo

### 3.1.3. Entidades con el mayor número de tutelas

En 2014, la Unidad para la Atención y Reparación Integral a las Víctimas no solo continuó como la entidad con más tutelas en el país, sino que incrementó su frecuencia en un 69,33% con respecto al año anterior (Tabla 5). Esta entidad fue creada en 2012, con el fin de dar cumplimiento a la Ley de Víctimas y Restitución de tierras (Ley 1448 de 2011) y es la encargada de coordinar las medidas de asistencia, atención y reparación otorgadas por el Estado; entregar la ayuda humanitaria y coordinar el Sistema Nacional para la Atención y Reparación Integral a las Víctimas.

La reparación integral a las víctimas implica no sólo una indemnización monetaria o la restitución de unos bienes, sino también un acompañamiento del Estado en materia de educación, salud, vivienda, programas de empleo y generación de ingresos, entre otras, y acciones para devolverles su dignidad, su memoria, recuperar la verdad y crear las condiciones para que hechos como los que sufrieron no vuelvan a repetirse<sup>38</sup>. La Ley ampara no sólo a quienes sufrieron desplazamiento forzado, despojo o abandono de tierras, sino también homicidio, secuestro, tortura, desaparición forzada, reclutamiento de menores, minas antipersona y delitos contra la libertad sexual.

Precisamente en 2014, la Corte Constitucional hizo un fuerte llamado de atención a la Unidad para la Atención y Reparación Integral a las Víctimas, y la exhortó para que se abstuviera *“de negar las solicitudes de ayuda humanitaria de la población desplazada”*<sup>39</sup>.

De las 146.603 tutelas que se interpusieron en contra de la Unidad para la Atención y Reparación Integral a las Víctimas, 102.338, es decir, el 69,8%, se originaron en Antioquia, seguida de Bogotá (9,3%), Caquetá (5,4%), Putumayo (3,1%) y Meta (2,9%).

Los derechos más invocados en la tutelas interpuestas contra dicha entidad fueron: de petición, en el 84,2% de los casos; otros derechos económicos, sociales y culturales (28,2%); vida digna y dignidad humana (7,9%), igualdad (2%) y vida (1%). En primera instancia, los jueces favorecen a los tutelantes en el 82,8% de los casos.

38 <http://www.unidadvictimas.gov.co/index.php/conozca-sus-derechos/abc-de-la-ley>

39 Colombia. Corte Constitucional. Sentencia T-218 de 2014. Expediente 4125439. M.P. MARÍA VICTORIA CALLE CORREA.

Tabla 5.  
Entidades con más tutelas en el país  
Periodo 2013-2014

|                                                                 | 2013       |         | 2014       |         | Variación<br>% |
|-----------------------------------------------------------------|------------|---------|------------|---------|----------------|
|                                                                 | Nº Tutelas | Part. % | Nº Tutelas | Part. % |                |
| Unidad para la Atención y Reparación Integral a las Víctimas    | 86.578     | 19,03%  | 146.603    | 29,41%  | 69,33          |
| ISS/Colpensiones                                                | 64.018     | 14,07%  | 50.160     | 10,06%  | -21,65         |
| Juzgados, Cortes, Tribunales                                    | 23.138     | 5,08%   | 25.431     | 5,10%   | 9,91           |
| Alcaldías                                                       | 19.161     | 4,21%   | 18.273     | 3,67%   | -4,63          |
| Cooomeva                                                        | 19.595     | 4,31%   | 17.712     | 3,55%   | -9,61          |
| Saludcoop                                                       | 14.534     | 3,19%   | 16.531     | 3,32%   | 13,74          |
| Inpec/ Penitenciarias                                           | 16.690     | 3,67%   | 16.320     | 3,27%   | -2,22          |
| Nueva EPS                                                       | 12.860     | 2,83%   | 15.295     | 3,07%   | 18,93          |
| Caprecom                                                        | 10.179     | 2,24%   | 11.287     | 2,26%   | 10,89          |
| Fuerzas Militares y de policía                                  | 8.605      | 1,89%   | 9.828      | 1,97%   | 14,21          |
| Oficinas de Tránsito y similares                                | 4.942      | 1,09%   | 9.448      | 1,90%   | 91,18          |
| Ministerios                                                     | 7.431      | 1,63%   | 7.516      | 1,51%   | 1,14           |
| Salud Total                                                     | 6.461      | 1,42%   | 7.158      | 1,44%   | 10,79          |
| Empresas de servicios públicos-Operadores celulares             | 6.854      | 1,51%   | 6.379      | 1,28%   | -6,93          |
| Cafesalud                                                       | 5.145      | 1,13%   | 5.850      | 1,17%   | 13,70          |
| Bancos y Corporaciones                                          | 5.415      | 1,19%   | 4.905      | 0,98%   | -9,42          |
| Comfama/ Alianza EPS/ Savia                                     | 3.931      | 0,86%   | 4.754      | 0,95%   | 20,94          |
| Sura EPS                                                        | 4.409      | 0,97%   | 4.708      | 0,94%   | 6,78           |
| Servicio Occidental de Salud S.O.S                              | 3.836      | 0,84%   | 4.225      | 0,85%   | 10,14          |
| Secretarías de Salud/ Direcciones de salud                      | 5.429      | 1,19%   | 4.139      | 0,83%   | -23,76         |
| Departamento para la Prosperidad Social                         | 10.563     | 2,32%   | 3.867      | 0,78%   | -63,39         |
| Secretarías de Educación                                        | 6.531      | 1,44%   | 3.837      | 0,77%   | -41,25         |
| Asociación Mutual La Esperanza "Asmet Salud"                    | 2.448      | 0,54%   | 3.467      | 0,70%   | 41,63          |
| Gobernaciones                                                   | 3.548      | 0,78%   | 3.442      | 0,69%   | -2,99          |
| Universidades                                                   | 3.043      | 0,67%   | 3.013      | 0,60%   | -0,99          |
| Sánitas                                                         | 2.417      | 0,53%   | 2.708      | 0,54%   | 12,04          |
| Emssanar                                                        | 2.097      | 0,46%   | 2.700      | 0,54%   | 28,76          |
| Saludvida                                                       | 1.773      | 0,39%   | 2.598      | 0,52%   | 46,53          |
| Fiscalía General de la Nación                                   | 2.390      | 0,53%   | 2.495      | 0,50%   | 4,39           |
| Registraduría Nacional del estado Civil y Consejo Electoral     | 2.288      | 0,50%   | 2.403      | 0,48%   | 5,03           |
| Fondo de pensiones y cesantías Porvenir - Horizonte             | 1.734      | 0,38%   | 2.168      | 0,43%   | 25,03          |
| Comparta                                                        | 1.654      | 0,36%   | 2.142      | 0,43%   | 29,50          |
| Fondo Nacional de Vivienda                                      | 1.053      | 0,23%   | 2.036      | 0,41%   | 93,35          |
| ICBF y Comisarias de Familia                                    | 1.115      | 0,25%   | 2.014      | 0,40%   | 80,63          |
| Centros Educativos y sena                                       | 2.262      | 0,50%   | 2.003      | 0,40%   | -11,45         |
| Famisanar                                                       | 2.165      | 0,48%   | 1.982      | 0,40%   | -8,45          |
| Unidad Administrativa Especial de Gestión y Parafiscales -UGPP- | 2.660      | 0,58%   | 1.809      | 0,36%   | -31,99         |
| Fondo de Pensiones Protección - ING                             | 1.446      | 0,32%   | 1.696      | 0,34%   | 17,29          |
| ARL Positiva                                                    | 1.679      | 0,37%   | 1.633      | 0,33%   | -2,74          |
| Instituto Agustín Codazzi                                       | 1.285      | 0,28%   | 1.440      | 0,29%   | 12,06          |
| Superintendencias                                               | 1.547      | 0,34%   | 1.377      | 0,28%   | -10,99         |
| Capital Salud                                                   | 1.160      | 0,25%   | 1.234      | 0,25%   | 6,38           |
| Otros                                                           | 68.972     | 15,16%  | 59.916     | 12,02%  | -13,13         |
| Total                                                           | 455.041    | 100%    | 498.502    | 100%    | 9,55           |

Fuente: Corte Constitucional  
Cálculos: Defensoría del Pueblo

La segunda entidad con el mayor número de tutelas en el país durante 2014 fue ISS/Colpensiones con 50.160 acciones, 21,65% menos con relación a 2013.

Antioquia es el departamento con el mayor número de tutelas (26,3%), seguido de la ciudad de Bogotá (26,1%), Valle del Cauca (13,5%), Santander (5%) y Risaralda (4,9%).

En el 87,2% de las tutelas interpuestas por los usuarios del ISS/Colpensiones, estuvo presente el derecho de petición, seguido de seguridad social (13,5%), otros derechos económicos sociales y culturales (7,9%), debido proceso (4,2%), vida digna y dignidad humana (2,2%). Las decisiones en primera instancia, favorecieron a estos usuarios en el 89,6% de los casos.

En tercer lugar dentro de las entidades más tuteladas en el país estuvieron los Juzgados, Cortes y Tribunales, que en conjunto concentraron 25.431 acciones. El derecho al debido proceso fue el más invocado con un 82,8%; seguido del derecho de petición, con el 13,5%; y el derecho a la igualdad (5,5%). En la ciudad de Bogotá se originaron la mitad de estas acciones y la decisión de primera instancia solo favoreció al 17,2% de los tutelantes.

En un cuarto lugar se ubicaron las Alcaldías municipales, con tutelas dirigidas directamente al mandatario o contra sus dependencias (Sisbén, Catastro, Planeación etc.), más frecuentes en los municipios del departamento de Antioquia. El derecho de petición fue invocado en el 55,3% de las acciones y la decisión en primera instancia favoreció a los accionantes en el 37,8% de los casos.

Cooomeva EPS apareció como la quinta entidad más tutelada en Colombia, con el 3,55%. Los derechos más invocados fueron salud (73,6%), vida digna y dignidad humana (35,5%), y seguridad social (32,3%). En primera instancia los jueces favorecieron a los usuarios en el 83,96% de las tutelas.

#### 3.1.4. Despachos judiciales y decisión en primera instancia.

En 2014, el porcentaje de favorecimiento a los ciudadanos en primera instancia fue del 69,93%, con un aumento de 1,16 puntos porcentuales con relación a 2013 (Tabla 6). Los juzgados administrativos (83,2 %), juzgados civiles del circuito especializado (81,62%) y juzgados de familia (80,88%), obtuvieron los mayores porcentajes; mientras que los más bajos se observaron en las tutelas tramitadas por la Corte Suprema de Justicia (9,52%), Consejo de Estado (15,21%) y Tribunales Superiores (35,96%).

Las tutelas que invocaron el derecho a la salud fueron las más favorecidas en primera instancia (83,2%); le siguieron las tutelas que incluían el derecho a la vida

digna y dignidad humana (81,5%); a la vida (80,1%); seguridad social (76,2%) e integridad física (76,2%). Los derechos con menor favorecimiento fueron los políticos (19,5%), de asociación (22,2%), debido proceso (26,6%) y libertad (27,4%).

A nivel de demandado, Comfamiliar Nariño fue la entidad con el mayor número de fallos en contra en primera instancia, con el 95,8% de los casos, seguida de Comfacor (92,6%), Savia EPS (91%) e ISS/Colpensiones (89,5%).

Tabla 6.  
Despachos Judiciales y decisión en primera Instancia  
Periodo 2013 – 2014

|                                          | 2013       |         |                                           | 2014       |         |                                           |
|------------------------------------------|------------|---------|-------------------------------------------|------------|---------|-------------------------------------------|
|                                          | N° Tutelas | Part. % | Decisión favorable en Primera Instancia % | N° Tutelas | Part. % | Decisión favorable en Primera Instancia % |
| Juzgado Penal del Circuito               | 57.796     | 12,72   | 78,01                                     | 65.339     | 13,11   | 77,90                                     |
| Juzgado Civil Municipal                  | 60.400     | 13,29   | 63,52                                     | 62.024     | 12,45   | 63,68                                     |
| Juzgado Civil del Circuito               | 55.327     | 12,17   | 73,15                                     | 57.399     | 11,52   | 73,85                                     |
| Juzgado Penal Municipal                  | 56.498     | 12,43   | 65,26                                     | 55.112     | 11,06   | 64,89                                     |
| Juzgados Administrativos                 | 30.977     | 6,82    | 79,97                                     | 51.570     | 10,35   | 83,20                                     |
| Juzgado Laboral del Circuito             | 39.813     | 8,76    | 80,12                                     | 43.463     | 8,72    | 77,60                                     |
| Juzgado Promiscuo Municipal              | 31.018     | 6,82    | 64,61                                     | 32.829     | 6,59    | 65,34                                     |
| Tribunal Superior                        | 24.188     | 5,32    | 34,37                                     | 24.816     | 4,98    | 35,96                                     |
| Juzgado Penal para Adolescentes          | 19.685     | 4,33    | 73,29                                     | 21.700     | 4,36    | 73,14                                     |
| Juzgado de Familia                       | 20.202     | 4,44    | 81,73                                     | 20.781     | 4,17    | 80,88                                     |
| Juzgado de Ejecución de Penas            | 14.298     | 3,15    | 71,52                                     | 15.352     | 3,08    | 73,45                                     |
| Juzgado Promiscuo de Familia             | 7.675      | 1,69    | 73,69                                     | 9.021      | 1,81    | 78,65                                     |
| Juzgado Penal del Circuito Especializado | 8.612      | 1,89    | 81,20                                     | 8.270      | 1,66    | 80,67                                     |
| Tribunal Administrativo                  | 9.302      | 2,05    | 42,33                                     | 7.464      | 1,50    | 49,60                                     |
| Corte Suprema de Justicia                | 4.443      | 0,98    | 10,69                                     | 5.324      | 1,07    | 9,52                                      |
| Juzgado Promiscuo del Circuito           | 3.222      | 0,71    | 72,35                                     | 4.293      | 0,86    | 74,66                                     |
| Juzgado Civil del Circuito Especializado | 2.920      | 0,64    | 77,19                                     | 4.134      | 0,83    | 81,62                                     |
| Consejo de Estado                        | 2.141      | 0,47    | 13,59                                     | 2.748      | 0,55    | 15,21                                     |
| Juzgado de Familia del Circuito          | 1.888      | 0,42    | 74,89                                     | 2.409      | 0,48    | 78,04                                     |
| Consejo Seccional de la Judicatura       | 1.971      | 0,43    | 37,60                                     | 2.285      | 0,46    | 36,24                                     |
| Juzgado de Menores                       | 1.048      | 0,23    | 76,72                                     | 1.074      | 0,22    | 56,42                                     |
| Juzgado de Pequeñas Causas Laboral       | 1.038      | 0,23    | 62,52                                     | 833        | 0,17    | 73,95                                     |
| Unidad Judicial Municipal                | 38         | 0,01    | 42,11                                     | 0          | 0,00    |                                           |
| Total                                    | 454.500    | 100,00  | 68,77                                     | 498.240    | 100,00  | 69,93                                     |

Fuente: Corte Constitucional  
Cálculos: Defensoría del Pueblo

### 3.2. La tutela y el derecho a la salud.

Los resultados de esta sección se refieren a las tutelas en las cuales los ciudadanos invocaron el derecho a la salud, bien sea como derecho fundamental solo o en conjunto con otros derechos.

Desde hace varios años, el derecho a la salud es el segundo derecho más invocado, y su participación dentro del universo de tutelas en 2014 fue de 23,74%, lo que equivale a 118.281 acciones (Tabla 7). No obstante, la anterior cifra puede ser aún mayor en razón de que muchos usuarios también solicitan servicios de salud, invocando el derecho de petición o el derecho a la seguridad social.

El número de tutelas en salud, como se observa en la gráfica N° 2, declinó en los años 2009 y 2010, después de emitida la Sentencia T-760 de 2008, sin embargo, a partir del año 2011, la tendencia crece nuevamente, lo que indica que las violaciones al derecho fundamental a la salud persisten y que los usuarios tienen que recurrir a la tutela para evitar su vulneración.

Tal como se manifestó, el derecho a la salud fue el derecho más protegido por los jueces de la república en 2014. En el 83,2% de las tutelas que lo invocaron, las decisiones favorecieron a los tutelantes, lo que indica el alto nivel de pertinencia y procedibilidad de la Acción de tutela, para que por esta vía se logre subsanar una conducta violatoria del derecho fundamental a la salud. En el porcentaje no concedido correspondiente al 16,8%, se encuentran algunas tutelas negadas por hecho superado o por muerte del accionante, lo que aumenta su grado de pertinencia.

Tabla 7.  
Participación de las tutelas de salud  
Periodo 2013 – 2014

| Año   | Tutelas   |           | Participación<br>salud % | Tasa de crecimiento anual % |        |
|-------|-----------|-----------|--------------------------|-----------------------------|--------|
|       | Total     | Salud     |                          | Total                       | Salud  |
| 1999  | 86.313    | 21.301    | 24,68                    | -                           | -      |
| 2000  | 131.764   | 24.843    | 18,85                    | 52,66                       | 16,63  |
| 2001  | 133.272   | 34.319    | 25,75                    | 1,14                        | 38,14  |
| 2002  | 143.887   | 42.734    | 29,70                    | 7,96                        | 24,52  |
| 2003  | 149.439   | 51.944    | 34,76                    | 3,86                        | 21,55  |
| 2004  | 198.125   | 72.033    | 36,36                    | 32,58                       | 38,67  |
| 2005  | 224.270   | 81.017    | 36,12                    | 13,20                       | 12,47  |
| 2006  | 256.166   | 96.226    | 37,56                    | 14,22                       | 18,77  |
| 2007  | 283.637   | 107.238   | 37,81                    | 10,72                       | 11,44  |
| 2008  | 344.468   | 142.957   | 41,50                    | 21,45                       | 33,31  |
| 2009  | 370.640   | 100.490   | 27,11                    | 7,60                        | -29,71 |
| 2010  | 403.380   | 94.502    | 23,43                    | 8,83                        | -5,96  |
| 2011  | 405.359   | 105.947   | 26,14                    | 0,49                        | 12,11  |
| 2012  | 424.400   | 114.313   | 26,94                    | 4,70                        | 7,90   |
| 2013  | 454.500   | 115.147   | 25,33                    | 7,09                        | 0,73   |
| 2014  | 498.240   | 118.281   | 23,74                    | 9,62                        | 2,72   |
| TOTAL | 4.507.860 | 1.323.292 | 29,36                    |                             |        |

Fuente: Corte Constitucional  
Cálculos: Defensoría del Pueblo

Gráfica 2.  
Evolución de las tutelas en Colombia  
Periodo 1999 – 2014

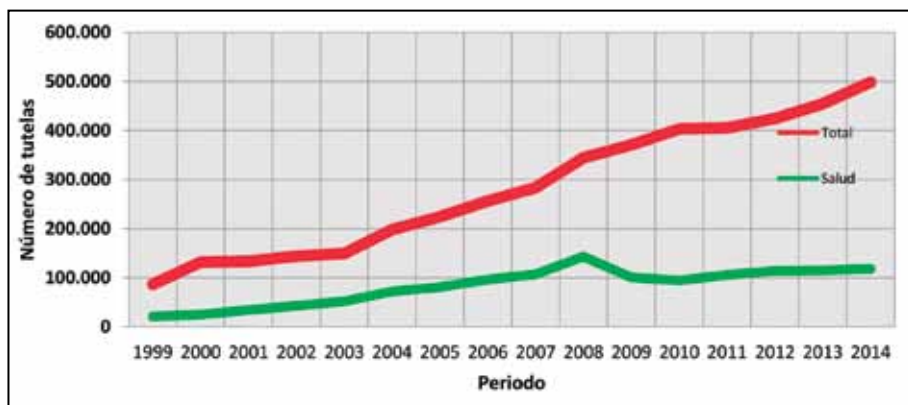

### 3.2.1. Tutelas en salud por departamento.

Igual que en los últimos años, el departamento de Antioquia sigue siendo la región donde más se interponen tutelas para reclamar servicios de salud (24.239), aunque en los dos últimos periodos su frecuencia ha disminuido en 10%. En 120 de sus municipios, al menos una tutela invocaba el derecho a la salud y Medellín concentró el 53% de esas tutelas, seguido de Bello (5,5%), Itagüi (5,3%), Envigado (5%) y Rionegro (3,8%).

El grupo Comfama, Alianza Medellín y Savia con el 18,4% fue el más tutelado, seguido de Coomeva (13,1%), Nueva EPS (11,2%), Sura EPS (9,8%) y SaludCoop (8,5%). Las decisiones en primera instancia favorecieron a los antioqueños en el 87,1% de las tutelas que invocaron este derecho.

La segunda región con más tutelas en salud fue el departamento de Valle del Cauca (13.529), con un crecimiento del 9,2% en relación a 2013. En 41 municipios se interpuso al menos una tutela, Cali fue la ciudad con mayor participación, con el 56,8%; seguida de Palmira (13,3%), Tuluá (7,5%), Buga (5,1%) y Cartago (3,8%).

La Nueva EPS fue la entidad con más tutelas en este departamento (16,9%), seguida de Coomeva (16%), Emssanar (12,4%), Servicio Occidental de Salud -SOS- (11,1%), y SaludCoop (5,3%). En el 82,9% de los casos los jueces favorecieron en primera instancia a los vallecaucanos.

En tercer lugar apareció la ciudad de Bogotá, que después de un crecimiento de 35,39% en 2013, ocasionado por el retiro y liquidación de varias de las EPS de los dos (2) regímenes, en 2014 disminuyó su frecuencia en 5,02%.

Las entidades con más tutelas que invocaron el derecho a la salud fueron en su orden: Nueva EPS (10,9%), Capital salud (7,8%), Famisanar (7,4%), SaludCoop (7,3%) y Caprecom (7%). En decisión de primera instancia los jueces favorecieron a los bogotanos en el 74,1% de las acciones.

En cuarto lugar se ubicó el departamento de Caldas con el 6,95% de las tutelas en salud y en 27 municipios se interpuso al menos una tutela que lo invocaba. La ciudad de Manizales registró la mayor cantidad de acciones (71,9%) seguido de La Dorada (9,8%) Chinchiná (4,3%), Salamina (3,6%) y Riosucio (2,6%).

Las entidades con más acciones de tutela en Caldas fueron: Caprecom (24,5%), Nueva EPS (10,4%), Cafesalud (9,9%), Saludvida (8,7%) y SaludCoop (8%). En decisión de primera instancia los jueces favorecieron a los caldenses en el 88,3% de las ocasiones.

La quinta región en cuanto al número de tutelas de salud fue Santander con una participación de 9,95%. En 65 municipios al menos una tutela invocaba este derecho. La ciudad de Bucaramanga fue la de mayor participación con 66,4%, seguida de Barrancabermeja (16,1%), San Gil (3,2%), Socorro (2%) y Málaga (1,9%).

SaludCoop fue la entidad con el mayor número de tutelas en el departamento (16,5%), seguida de Nueva EPS (12,2%) Coomeva (11,9%), Caprecom (8%) y Salud Total (7,8%). En decisión de primera instancia, los Jueces favorecieron a los santandereanos en el 85,4% de los casos.

En 21 de las 33 regiones del país (32 departamentos y la ciudad de Bogotá), se presentaron incrementos en el número de tutelas que invocaron el derecho a la salud. Los mayores crecimientos porcentuales se localizan en Amazonas, San Andrés, Huila, Arauca, Quindío y Risaralda (Tabla 8). Adicionalmente, hay que resaltar la disminución de tutelas en 3 regiones generadoras de un alto volumen de acciones en salud: Antioquia, Bogotá y Atlántico.

Tabla 8.  
Tutelas de salud según departamento  
Periodo 2013 – 2014

|                    | 2013       |         | 2014       |         | Variación % |
|--------------------|------------|---------|------------|---------|-------------|
|                    | N° Tutelas | Part. % | N° Tutelas | Part. % |             |
| Antioquia          | 25.036     | 21,17   | 24.239     | 20,49   | -3,18       |
| Valle              | 12.389     | 10,47   | 13.529     | 11,44   | 9,20        |
| Bogotá D.C         | 13.349     | 11,29   | 12.679     | 10,72   | -5,02       |
| Caldas             | 7.758      | 6,56    | 8.226      | 6,95    | 6,03        |
| Santander          | 7.228      | 6,11    | 7.947      | 6,72    | 9,95        |
| Norte de Santander | 5.548      | 4,69    | 5.682      | 4,80    | 2,42        |
| Risaralda          | 4.151      | 3,51    | 4.662      | 3,94    | 12,31       |
| Tolima             | 4.478      | 3,79    | 4.604      | 3,89    | 2,81        |
| Atlántico          | 4.251      | 3,59    | 3.859      | 3,26    | -9,22       |
| Cesar              | 3.362      | 2,84    | 3.513      | 2,97    | 4,49        |
| Bolívar            | 2.808      | 2,37    | 3.041      | 2,57    | 8,30        |
| Cauca              | 2.843      | 2,40    | 2.956      | 2,50    | 3,97        |
| Huila              | 2.082      | 1,76    | 2.902      | 2,45    | 39,39       |
| Córdoba            | 2.607      | 2,20    | 2.704      | 2,29    | 3,72        |
| Quindío            | 2.176      | 1,84    | 2.614      | 2,21    | 20,13       |
| Cundinamarca       | 2.406      | 2,03    | 2.244      | 1,90    | -6,73       |
| Nariño             | 1.995      | 1,69    | 2.095      | 1,77    | 5,01        |
| Meta               | 2.302      | 1,95    | 2.094      | 1,77    | -9,04       |
| Magdalena          | 1.861      | 1,57    | 1.865      | 1,58    | 0,21        |
| Boyacá             | 1.535      | 1,30    | 1.629      | 1,38    | 6,12        |
| Sucre              | 1.202      | 1,02    | 1.318      | 1,11    | 9,65        |
| Caquetá            | 806        | 0,68    | 795        | 0,67    | -1,36       |
| La Guajira         | 754        | 0,64    | 650        | 0,55    | -13,79      |
| Arauca             | 486        | 0,41    | 617        | 0,52    | 26,95       |
| Casanare           | 535        | 0,45    | 473        | 0,40    | -11,59      |
| Chocó              | 374        | 0,32    | 401        | 0,34    | 7,22        |
| San Andrés         | 203        | 0,17    | 271        | 0,23    | 33,50       |
| Putumayo           | 181        | 0,15    | 206        | 0,17    | 13,81       |
| Amazonas           | 133        | 0,11    | 206        | 0,17    | 54,89       |
| Guaviare           | 126        | 0,11    | 118        | 0,10    | -6,35       |
| Guainía            | 68         | 0,06    | 64         | 0,05    | -5,88       |
| Vichada            | 78         | 0,07    | 57         | 0,05    | -26,92      |
| Vaupés             | 36         | 0,03    | 21         | 0,02    | -41,67      |
| Total              | 115.147    | 100,00  | 118.281    | 100,00  | 2,72        |

Fuente: Corte Constitucional  
Cálculos: Defensoría del Pueblo

Mapa 3.

Municipios con tutelas en salud en 2013

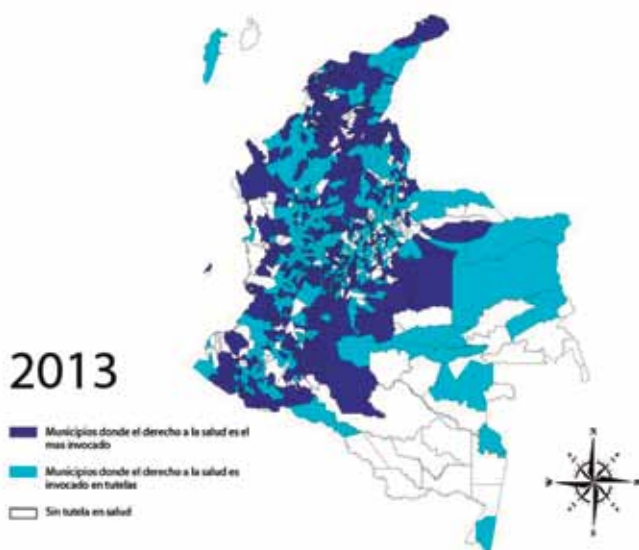

Mapa 4.

Municipios con tutelas en salud en 2014

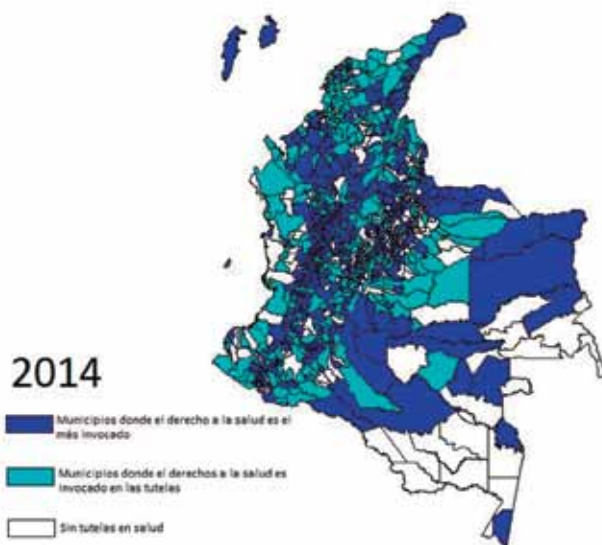

El indicador “Número de tutelas en Salud por cada 10.000 habitantes”, fue de 24,82, cifra similar a la calculada en 2013. En doce (12) departamentos, este indicador es superior al indicador nacional (24,82).

Igual que en 2013, Caldas se mantuvo en 2014, como el departamento con el indicador más alto (83,42) con un incremento de 5,82%. Le siguieron Risaralda, Quindío, Norte de Santander y Santander. Los indicadores más bajos se visualizaron en Vaupés, Putumayo, La Guajira, Chocó y Vichada. Los mayores incrementos en el indicador se presentaron en Amazonas, Huila, San Andrés, Arauca y Quindío; mientras que en Vaupés, Vichada, La Guajira, Casanare y Meta se observaron las disminuciones más significativas (Tabla 9).

Tabla 9.  
Número de tutelas en salud por cada 10.000 habitantes  
Según departamento Período- 2013-2014

|                    | 2013                           | 2014                           | Variación % |
|--------------------|--------------------------------|--------------------------------|-------------|
|                    | Nº Tutelas X 10.000 Habitantes | Nº Tutelas X 10.000 Habitantes |             |
| Caldas             | 78,83                          | 83,42                          | 5,82        |
| Risaralda          | 44,10                          | 49,25                          | 11,68       |
| Quindío            | 38,93                          | 46,51                          | 19,45       |
| Norte de Santander | 41,64                          | 42,28                          | 1,53        |
| Santander          | 35,41                          | 38,75                          | 9,41        |
| Antioquia          | 39,74                          | 38,00                          | -4,37       |
| San Andrés         | 27,01                          | 35,75                          | 32,36       |
| Cesar              | 33,48                          | 34,56                          | 3,21        |
| Tolima             | 31,98                          | 32,79                          | 2,52        |
| Valle              | 27,41                          | 29,63                          | 8,08        |
| Amazonas           | 17,84                          | 27,33                          | 53,17       |
| Huila              | 18,49                          | 25,44                          | 37,60       |
| Arauca             | 18,95                          | 23,78                          | 25,53       |
| Meta               | 24,89                          | 22,21                          | -10,79      |
| Cauca              | 20,99                          | 21,62                          | 3,05        |
| Caquetá            | 17,32                          | 16,86                          | -2,66       |
| Bogotá D.C         | 17,39                          | 16,30                          | -6,25       |
| Córdoba            | 15,72                          | 16,06                          | 2,14        |
| Atlántico          | 17,69                          | 15,87                          | -10,31      |
| Guainía            | 16,91                          | 15,67                          | -7,35       |
| Sucre              | 14,40                          | 15,63                          | 8,58        |
| Magdalena          | 15,06                          | 14,95                          | -0,75       |
| Bolívar            | 13,70                          | 14,67                          | 7,05        |
| Casanare           | 15,55                          | 13,51                          | -13,15      |
| Boyacá             | 12,06                          | 12,78                          | 5,98        |
| Nariño             | 11,72                          | 12,16                          | 3,72        |
| Guaviare           | 11,67                          | 10,78                          | -7,68       |
| Cundinamarca       | 9,26                           | 8,50                           | -8,18       |
| Vichada            | 11,37                          | 8,11                           | -28,68      |
| Chocó              | 7,63                           | 8,10                           | 6,14        |
| La Guajira         | 8,36                           | 6,99                           | -16,37      |
| Putumayo           | 5,37                           | 6,04                           | 12,48       |
| Vaupés             | 8,41                           | 4,86                           | -42,25      |
| ÍNDICE TOTAL PAÍS  | 24,44                          | 24,82                          | 1,56        |

Fuente: Corte Constitucional  
Cálculos: Defensoría del Pueblo

Según el indicador a nivel municipal, a excepción de los rangos de municipios entre 1 y 10 tutelas, y entre 41 y 50 tutelas, los demás tuvieron incrementos significativos (Tabla 10.)

Tabla 10.  
Número de municipios según tutelas en salud por cada 10.000 habitantes  
Periodo 2013 – 2014

|                       | 2013             |         | 2014             |         | Variación % |
|-----------------------|------------------|---------|------------------|---------|-------------|
|                       | N° de municipios | Part. % | N° de municipios | Part. % |             |
| Sin Tutelas           | 232              | 20,68   | 248              | 22,10   | 6,90        |
| Entre 1 y 10 Tutelas  | 616              | 54,90   | 557              | 49,64   | -9,58       |
| Entre 11 y 20 Tutelas | 131              | 11,68   | 156              | 13,90   | 19,08       |
| Entre 21 y 30 Tutelas | 51               | 4,55    | 59               | 5,26    | 15,69       |
| Entre 31 y 40 Tutelas | 35               | 3,12    | 41               | 3,65    | 17,14       |
| Entre 41 y 50 Tutelas | 20               | 1,78    | 19               | 1,69    | -5,00       |
| Mas de 50 Tutelas     | 37               | 3,30    | 42               | 3,74    | 13,51       |
| Total                 | 1.122            | 100,00  | 1.122            | 100,00  | 0,00        |

Fuente: Corte Constitucional  
Cálculos: Defensoría del Pueblo

Los municipios con más de 50 tutelas en salud por cada 10.000 habitantes aumentaron de 37 a 42, persistiendo la mayoría de los municipios que se registraron en 2013 (Tabla 11).

Tabla 11.  
Número de municipios según tutelas en salud por cada 10.000 habitantes  
Periodo 2013 – 2014

| Departamento       | 2013                                                                                                                               | 2014                                                                                                                                              |
|--------------------|------------------------------------------------------------------------------------------------------------------------------------|---------------------------------------------------------------------------------------------------------------------------------------------------|
| Amazonas           |                                                                                                                                    | Leticia                                                                                                                                           |
| Antioquia          | Medellín, Cisneros, Jericó, La ceja, Marinilla, Titiribí, Rionegro, San Vicente, El Santuario, Angelópolis, Itagüí, Ciudad Bolívar | Medellín, Andes, Cisneros, Concepción, Envigado, Fredonia, Jericó, La ceja, Marinilla, Titiribí, Rionegro, San Vicente, El Santuario y Valparaiso |
| Boyacá             |                                                                                                                                    | San José de Pare                                                                                                                                  |
| Caldas             | Manizales, La Dorada, Salamina, Chinchiná, Belalcázar, Viterbo                                                                     | Manizales, La Dorada, Salamina, Chinchiná, Norcasia,                                                                                              |
| Cauca              | Popayán                                                                                                                            | Popayán                                                                                                                                           |
| Cesar              | Valledupar                                                                                                                         | Valledupar                                                                                                                                        |
| Cundinamarca       | Nariño, Guataquí, La Palma                                                                                                         | Nariño                                                                                                                                            |
| Huila              | Hobo                                                                                                                               | Neiva                                                                                                                                             |
| Meta               | Acacias, Restrepo                                                                                                                  |                                                                                                                                                   |
| Norte de Santander | Cúcuta                                                                                                                             | Cúcuta, Ocaña                                                                                                                                     |
| Quindío            | Armenia                                                                                                                            | Armenia                                                                                                                                           |
| Risaralda          | Pereira                                                                                                                            | Pereira, Santa Rosa de Cabal                                                                                                                      |
| Santander          | Bucaramanga, Barrancabermeja, Málaga                                                                                               | Bucaramanga, Barrancabermeja, Málaga, San Gil, San Miguel, Socorro                                                                                |
| Tolima             | Ibagué, Fresno                                                                                                                     | Ibagué, Fresno, Honda                                                                                                                             |
| Valle              | Guadalajara de Buga, Palmira                                                                                                       | Guadalajara de Buga, Palmira, Restrepo                                                                                                            |
| Vaupés             | Taraira                                                                                                                            |                                                                                                                                                   |

Mapa 5.  
Número de tutelas en salud por cada 10.000 habitantes en cada municipio, 2013

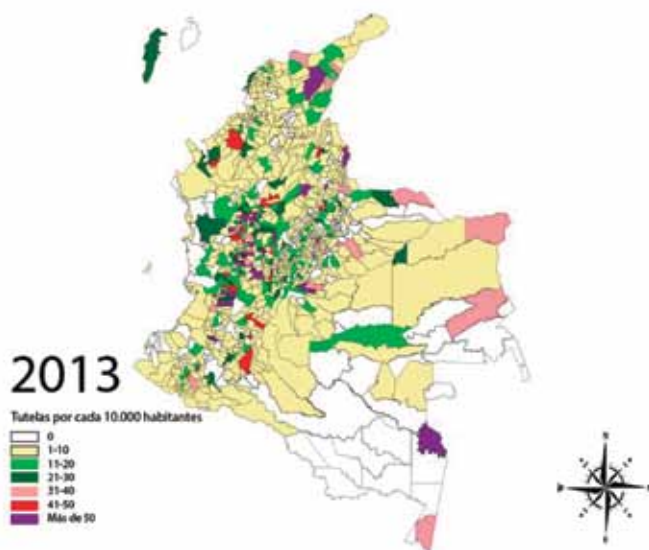

Mapa 6  
Número de tutelas en salud por cada 10.000 habitantes en cada municipio, 2014

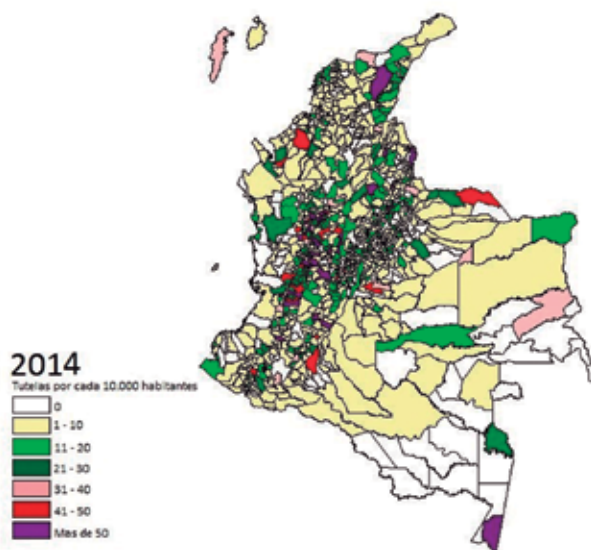

### 3.2.2. Despachos judiciales y decisión en primera instancia de las tutelas en salud.

En 2014, el porcentaje de favorecimiento en primera instancia a los ciudadanos que invocaron el derecho a la salud fue de 83,16%, superior en 2.11 puntos porcentuales al observado en 2013 (Tabla 12). Los indicadores de concesión más altos se observaron en los Juzgados de pequeñas causas laborales (88,28%), Juzgados civiles del circuito (86,84%) y Juzgados promiscuos de familia (86,69%); mientras que los más bajos se observaron en la Corte Suprema de Justicia (21,88%), el Consejo de Estado (36,36%) y Consejo Seccional de la Judicatura (61,33%).

Según la entidad demandada, Comfamiliar Nariño obtuvo el mayor número de fallos en contra en primera instancia con el 97,1%. Le siguieron Comfacor (93,5%), Fundación Médico Preventiva (90,4%), Emssanar (90,4%) y Asmet salud (89,2%).

Tabla 12.  
Despachos Judiciales y decisión en primera instancia Tutelas en Salud  
Periodo 2013 – 2014

|                                          | 2013       |        |                                           | 2014    |              |                                           |
|------------------------------------------|------------|--------|-------------------------------------------|---------|--------------|-------------------------------------------|
|                                          | N° Tutelas | Part.% | Decisión favorable en Primera Instancia % | Part.%  | % en Tutelas | Decisión favorable en Primera Instancia % |
| Juzgado Civil Municipal                  | 26.141     | 22,70  | 80,34                                     | 26.773  | 22,64        | 82,15                                     |
| Juzgado Penal Municipal                  | 27.962     | 24,28  | 79,90                                     | 26.533  | 22,43        | 81,88                                     |
| Juzgado Promiscuo Municipal              | 13.483     | 11,71  | 81,34                                     | 15.008  | 12,69        | 82,86                                     |
| Juzgado Penal del Circuito               | 9.455      | 8,21   | 83,34                                     | 9.940   | 8,40         | 85,28                                     |
| Juzgado Civil del Circuito               | 8.116      | 7,05   | 85,58                                     | 7.799   | 6,59         | 86,84                                     |
| Juzgado Penal para adolescentes          | 6.413      | 5,57   | 81,40                                     | 6.816   | 5,76         | 84,80                                     |
| Juzgados Administrativos                 | 4.018      | 3,49   | 83,30                                     | 5.049   | 4,27         | 84,87                                     |
| Juzgado Laboral del Circuito             | 4.524      | 3,93   | 83,51                                     | 4.631   | 3,92         | 85,38                                     |
| Juzgado de Familia                       | 3.627      | 3,15   | 83,98                                     | 3.550   | 3,00         | 86,62                                     |
| Juzgado de Ejecución de Penas            | 2.566      | 2,23   | 77,47                                     | 2.801   | 2,37         | 82,33                                     |
| Juzgado Promiscuo de familia             | 2.308      | 2,00   | 83,10                                     | 2.336   | 1,97         | 86,69                                     |
| Tribunal Superior                        | 1.885      | 1,64   | 66,21                                     | 2.130   | 1,80         | 69,20                                     |
| Juzgado Penal del Circuito Especializado | 1.377      | 1,20   | 84,97                                     | 1.294   | 1,09         | 86,55                                     |
| Juzgado Promiscuo del Circuito           | 737        | 0,64   | 80,19                                     | 969     | 0,82         | 86,17                                     |
| Tribunal Administrativo                  | 686        | 0,60   | 70,26                                     | 753     | 0,64         | 78,22                                     |
| Juzgado Civil del Circuito Especializado | 520        | 0,45   | 81,15                                     | 612     | 0,52         | 84,97                                     |
| Juzgado de Menores                       | 395        | 0,34   | 82,03                                     | 427     | 0,36         | 83,61                                     |
| Consejo Seccional de la Judicatura       | 252        | 0,22   | 59,52                                     | 300     | 0,25         | 61,33                                     |
| Juzgado de pequeñas causas laboral       | 306        | 0,27   | 80,72                                     | 273     | 0,23         | 88,28                                     |
| Juzgado Familia del Circuito             | 308        | 0,27   | 78,90                                     | 244     | 0,21         | 81,97                                     |
| Corte Suprema de Justicia                | 47         | 0,04   | 27,66                                     | 32      | 0,03         | 21,88                                     |
| Consejo de Estado                        | 13         | 0,01   | 30,77                                     | 11      | 0,01         | 36,36                                     |
| Unidad Judicial Municipal                | 8          | 0,01   | 50,00                                     | 0       | 0,00         |                                           |
| Total                                    | 115.147    | 100,00 | 81,05                                     | 118.281 | 100,00       | 83,16                                     |

Fuente: Corte Constitucional  
Cálculos: Defensoría del Pueblo

No obstante el alto grado de favorabilidad en primera instancia, los usuarios se ven en la necesidad de interponer desacatos, por no cumplimiento de los fallos.

### 3.2.3. El derecho a la salud y su relación con otros derechos.

El derecho a la salud también es invocado en conexidad con otros derechos. En el 43,85% de las tutelas lo pidieron con el derecho a la vida digna y dignidad humana; el 27,85% con el derecho a la seguridad social y el 16,9% con el derecho a la vida (Tabla 13).

Tabla 13.  
El derecho a la salud en asocio con otros derechos  
Periodo 2013 – 2014

|                                                  | 2013       |              | 2014       |              |
|--------------------------------------------------|------------|--------------|------------|--------------|
|                                                  | Nº Tutelas | % en Tutelas | Nº Tutelas | % en Tutelas |
| Salud                                            | 115.147    | 100,00       | 118.281    | 100,00       |
| Vida digna y Dignidad humana                     | 45.717     | 39,70        | 51.872     | 43,85        |
| Seguridad Social                                 | 29.364     | 25,50        | 32.937     | 27,85        |
| Vida                                             | 23.366     | 20,29        | 19.989     | 16,90        |
| Otros derechos económicos, sociales y culturales | 4.589      | 3,99         | 4.008      | 3,39         |
| Integridad física                                | 2.340      | 2,03         | 2.236      | 1,89         |
| Igualdad                                         | 1.990      | 1,73         | 2.052      | 1,73         |
| Petición                                         | 1.803      | 1,57         | 1.745      | 1,48         |
| Trabajo                                          | 829        | 0,72         | 841        | 0,71         |
| Debido proceso y defensa                         | 647        | 0,56         | 656        | 0,55         |
| Protección al menor y mujer embarazada           | 740        | 0,64         | 536        | 0,45         |
| Derechos colectivos y del medio ambiente         | 247        | 0,21         | 250        | 0,21         |
| Libertad de enseñanza, educación, investigación  | 220        | 0,19         | 183        | 0,15         |
| Libre desarrollo de la personalidad              | 95         | 0,08         | 83         | 0,07         |
| Intimidad, buen nombre y honra                   | 84         | 0,07         | 79         | 0,07         |
| Personalidad jurídica                            | 31         | 0,03         | 35         | 0,03         |
| Libertad individual                              | 19         | 0,02         | 30         | 0,03         |
| Libertad de locomoción                           | 13         | 0,01         | 10         | 0,01         |
| Libertad de expresión e información              | 4          | 0,00         | 6          | 0,01         |
| Otros                                            | 16         | 0,01         | 28         | 0,02         |

|                                     |         |         |
|-------------------------------------|---------|---------|
| Total tutelas de salud interpuestas | 115.147 | 118.281 |
|-------------------------------------|---------|---------|

Fuente: Corte Constitucional  
Cálculos: Defensoría del Pueblo

### 3.2.4. Entidades más demandadas en las tutelas de salud.

En 2014, la Nueva EPS se constituyó como la entidad más demandada (Tabla 14), con una participación del 11,38% con un incremento del 19,32% en el número de tutelas, desplazando a Coomeva. La concentración de las acciones contra dicha EPS se encuentra en el departamento de Antioquia (20,5%) seguido de Valle del Cauca (17,1%), Bogotá (10,1%), Santander (7,1%) y Caldas (6,1%). En primera instancia los jueces favorecen a los tutelantes en el 87,7% de los casos.

En 323 municipios se interpuso al menos una tutela invocando el derecho a la salud contra la Nueva EPS. Medellín, Bogotá, Cali, Bucaramanga, Manizales, Cúcuta, Palmira y Cartagena son las ciudades con la mayor cantidad.

Coomeva es la segunda entidad con más tutelas que invocaron el derecho a la salud en Colombia con una participación de 11,01%, y una disminución en el número de acciones de 7,97%.

Los departamentos con el mayor número de acciones contra Coomeva fueron Antioquia (24,5%) seguido de Valle del Cauca (16,6%), Atlántico (7,7%), Santander (7,3%) y Norte de Santander (6,3%). En primera instancia los jueces favorecieron a los tutelantes en el 87,4% de los casos. En 342 municipios los usuarios interpusieron al menos una tutela contra esta EPS. Medellín, Cartagena, Cali, Barranquilla, Cúcuta, Valledupar, Bucaramanga, Cartagena, Palmira y Santa Marta son las diez (10) ciudades con mayor frecuencia.

SaludCoop, se constituyó como la tercera EPS con más tutelas en salud, con 10,45% de participación, y un incremento del 20,46% respecto del año anterior. El mayor número de tutelas se presentaron en Antioquia (16,7%), Santander (10,6%), Bogotá (7,4%), Norte de Santander (6,7%) y Valle del Cauca (5,8%). El 87,5% de estas acciones son concedidas en primera instancia por los Jueces de la República.

La mayor dispersión de las tutelas en salud se encontró en esta EPS, ya que en 431 municipios del país se interpuso al menos una tutela contra esta entidad. Las tutelas son más frecuentes en Medellín, Bogotá, Bucaramanga, Cúcuta, Manizales, y Montería estuvieron las mayores frecuencias.

En cuarto lugar se ubicó la primera EPS del régimen subsidiado, Caprecom con una participación del 8,76% de las tutelas en salud y un incremento del 11,22% con respecto al año anterior. Los departamentos con el mayor número de acciones fueron Caldas (19,5%) Antioquia (9,6%), Tolima (9,4%), Bogotá (8,5%) y Valle del Cauca (6,4%). En primera instancia los jueces favorecen a los tutelantes en el 85,8% de los casos.

En 374 municipios se interpuso al menos una tutela en contra de Caprecom; las ciudades con la mayor frecuencia fueron Manizales, Bogotá, Ibagué, Cúcuta y Bucaramanga.

Como quinta entidad con más tutelas en salud durante 2014, está Salud Total, con una participación de 4,46% y un incremento del 16,69%. Los departamentos con el mayor número de acciones fueron Antioquia (18,3%), Bogotá (12,6%), Santander (11,8%), Caldas (11,1%) y Atlántico (7,3%). En primera instancia los jueces favorecieron a los tutelantes en el 80,5% de los casos.

En 144 municipios se interpuso al menos una tutela en contra de Salud Total; las ciudades con la mayor frecuencia fueron Medellín, Bogotá, Bucaramanga, Manizales y Cartagena.

Las entidades con los mayores incrementos porcentuales en el número de tutelas fueron Comfamiliar Huila, Golden Group, Saludvida, Asociación Mutua la Esperanza “Asmet Salud” y Comfacor, mientras la de mayor reducción fueron Comfenalco Antioquia, Aliansalud y las Secretarías de Salud (Tabla 14).

Tabla 14.  
Entidades más tuteladas en derecho a la salud  
Periodo 2013 – 2014

|                                                   | 2013       |         | 2014       |         | Variación % |
|---------------------------------------------------|------------|---------|------------|---------|-------------|
|                                                   | Nº Tutelas | Part. % | Nº Tutelas | Part. % |             |
| Nueva EPS                                         | 11.294     | 9,79    | 13.476     | 11,38   | 19,32       |
| Coomeva                                           | 14.170     | 12,28   | 13.041     | 11,01   | -7,97       |
| Saludcoop                                         | 10.272     | 8,90    | 12.374     | 10,45   | 20,46       |
| Caprecom                                          | 9.332      | 8,09    | 10.379     | 8,76    | 11,22       |
| Salud Total                                       | 4.529      | 3,93    | 5.285      | 4,46    | 16,69       |
| Cafesalud                                         | 4.415      | 3,83    | 5.146      | 4,35    | 16,56       |
| Comfama/Alianza Medellin/Savia                    | 3.720      | 3,22    | 4.502      | 3,80    | 21,02       |
| Secretarías de Salud/Direcciones de salud         | 4.786      | 4,15    | 3.560      | 3,01    | -25,62      |
| Asociación Mutual La Esperanza "Asmet Salud"      | 2.326      | 2,02    | 3.326      | 2,81    | 42,99       |
| Sura EPS                                          | 2.855      | 2,47    | 3.256      | 2,75    | 14,05       |
| Servicio Occidental de Salud S.O.S                | 2.769      | 2,40    | 2.974      | 2,51    | 7,40        |
| Fuerzas Militares y de policía                    | 2.260      | 1,96    | 2.892      | 2,44    | 27,96       |
| Emssanar                                          | 1.979      | 1,72    | 2.593      | 2,19    | 31,03       |
| Saludvida                                         | 1.611      | 1,40    | 2.410      | 2,03    | 49,60       |
| Sánitas                                           | 1.915      | 1,66    | 2.189      | 1,85    | 14,31       |
| INPEC/Penitenciarias                              | 2.753      | 2,39    | 2.065      | 1,74    | -24,99      |
| Comparta                                          | 1.551      | 1,34    | 2.027      | 1,71    | 30,69       |
| Famisanar                                         | 1.589      | 1,38    | 1.408      | 1,19    | -11,39      |
| Capital Salud EPS                                 | 1.090      | 0,94    | 1.142      | 0,96    | 4,77        |
| Comfamiliar Huila                                 | 611        | 0,53    | 1.043      | 0,88    | 70,70       |
| Coosalud EPS                                      | 1.127      | 0,98    | 1.027      | 0,87    | -8,87       |
| Fundación Médico Preventiva                       | 1.054      | 0,91    | 997        | 0,84    | -5,41       |
| Cruz Blanca                                       | 861        | 0,75    | 933        | 0,79    | 8,36        |
| Ministerios                                       | 797        | 0,69    | 914        | 0,77    | 14,68       |
| Alcaldías                                         | 817        | 0,71    | 799        | 0,67    | -2,20       |
| Comfenalco Antioquia                              | 1.610      | 1,40    | 793        | 0,67    | -50,75      |
| Seguro Social Pensiones-Colpensiones              | 750        | 0,65    | 757        | 0,64    | 0,93        |
| Aliansalud                                        | 969        | 0,84    | 718        | 0,61    | -25,90      |
| Compensar                                         | 642        | 0,56    | 711        | 0,60    | 10,75       |
| ARP Positiva                                      | 663        | 0,57    | 634        | 0,54    | -4,37       |
| Empresa Cooperativa Solidaria de Salud "Ecoospos" | 817        | 0,71    | 615        | 0,52    | -24,72      |
| Comfenalco Valle                                  | 685        | 0,59    | 614        | 0,52    | -10,36      |
| Cosmitet                                          | 697        | 0,60    | 590        | 0,50    | -15,35      |
| Emdis Salud                                       | 558        | 0,48    | 538        | 0,45    | -3,58       |
| Comfacor                                          | 398        | 0,34    | 536        | 0,45    | 34,67       |
| Unidad Para la Atención y Reparación de víctimas  | 604        | 0,52    | 508        | 0,43    | -15,89      |
| Golden Group                                      | 314        | 0,27    | 485        | 0,41    | 54,46       |
| Cajacopi                                          | 404        | 0,35    | 483        | 0,41    | 19,55       |
| Convinda                                          | 604        | 0,52    | 478        | 0,40    | -20,86      |
| Asociación Mutual Barrios Unidos de Quibdó        | 435        | 0,38    | 458        | 0,39    | 5,29        |
| Empresas de servicios públicos y telefonía móvil  | 427        | 0,37    | 407        | 0,34    | -4,68       |
| Asociación Mutual ser                             | 420        | 0,36    | 356        | 0,30    | -15,24      |
| Otros                                             | 13.892     | 12,04   | 8.989      | 7,59    | -35,29      |
| Total                                             | 115.372    | 100,00  | 118.428    | 100,00  | 2,65        |

Fuente: Corte Constitucional  
Cálculos: Defensoría del Pueblo

### 3.2.5. Tipo de entidad demandada.

Según la entidad demanda, estas fueron clasificadas en varias categorías, tal como se ha realizado en estudios anteriores. Las EPS, se dividieron en tres grupos a saber: EPS que prestan servicios únicamente en régimen contributivo, EPS que prestan servicios únicamente en régimen subsidiado y EPS que prestan servicios tanto en el régimen contributivo como en el subsidiado. Este último grupo obedece a la imposibilidad de poder identificar en la base de datos suministrada por la Honorable Corte Constitucional, el régimen al que pertenecía la EPS demandada.

Las Instituciones Prestadoras de Salud (IPS) fueron clasificadas de manera independiente cuando las acciones de tutela estaban dirigidas a ellas, sin establecer la condición del usuario respecto del sistema de aseguramiento en salud ni identificar la entidad aseguradora (EPS). En este grupo no se incluyó el Hospital Militar, la Clínica de la Policía ni el Hospital Naval, clasificados en el grupo de Fuerzas militares y de Policía.

Para completar la información se hicieron otras clasificaciones, según los datos suministrados en la tutela y la afinidad entre las entidades demandadas. En el caso de que en una misma tutela aparezca más de un demandado plenamente identificado, se contabilizó nuevamente para efectos estadísticos, descartando en los casos en que se mencionaba “otros”.

De acuerdo con los resultados, el 81,9% de las tutelas en salud en 2014 se dirigieron contra las EPS que prestan servicios tanto en el régimen contributivo como en el régimen subsidiado, incrementando su participación en 2 puntos, seguido por los Entes territoriales (4,02%), las Instituciones Prestadoras de Salud –IPS- (3,28%) y los regímenes de excepción (2,49%) (Tabla 15).

Tabla 15.  
Tutelas en salud, según tipo de entidad demandada  
Periodo 2013 – 2014

|                                                           | 2013       |         | 2014       |         | Variación % |
|-----------------------------------------------------------|------------|---------|------------|---------|-------------|
|                                                           | Nº Tutelas | Part. % | Nº Tutelas | Part. % |             |
| EPS solamente en Régimen Contributivo                     | 54.523     | 47,26   | 58.264     | 49,20   | 6,86        |
| EPS Sólomente en Régimen Subsidiado                       | 28.141     | 24,39   | 31.148     | 26,30   | 10,69       |
| EPS en Régimen Contributivo y Subsidiado                  | 9.508      | 8,24    | 7.556      | 6,38    | -20,53      |
| Entes Territoriales                                       | 6.121      | 5,31    | 4.756      | 4,02    | -22,30      |
| Instituciones Prestadoras de Salud - IPS                  | 4.473      | 3,88    | 3.890      | 3,28    | -13,03      |
| Regímenes de excepción                                    | 2.299      | 1,99    | 2.946      | 2,49    | 28,14       |
| Inpec/Penitenciarias                                      | 2.753      | 2,39    | 2.065      | 1,74    | -24,99      |
| Administradoras de Fondos de Pensiones - AFP              | 1.311      | 1,14    | 1.251      | 1,06    | -4,58       |
| Administradoras de Riesgos Laborales - ARL y Aseguradoras | 1.318      | 1,14    | 1.322      | 1,12    | 0,30        |
| Empresas de Servicios Públicos y Telefonía celular        | 413        | 0,36    | 406        | 0,34    | -1,69       |
| Empresas de Medicina Prepagada                            | 187        | 0,16    | 250        | 0,21    | 33,69       |
| Otras entidades                                           | 4.325      | 3,75    | 4.574      | 3,86    | 5,76        |
| Total                                                     | 115.372    | 100,00  | 118.428    | 100,00  | 2,65        |

Fuente: Corte Constitucional  
Cálculos: Defensoría del Pueblo

A continuación se hace un análisis al interior de cada categoría conformada.

### 3.2.5.1 EPS que prestan servicios únicamente en el régimen contributivo.

Según el reporte suministrado por el Ministerio de Salud y Protección Social, al 31 de diciembre de 2014, se encontraban 20.760.123 afiliados al régimen contributivo, en 15 EPS que aún existían (en 2014 dejó prestar servicios Comfenalco Antioquia). Adicionalmente, en este reporte se incluyeron 9.921 usuarios procedentes del régimen subsidiado, con ocasión a lo establecido en el Decreto 3047 de 2013 que determinó las condiciones y reglas para la movilidad entre regímenes, reglamentado por la Resolución 2635 de 2014, que definió las condiciones para la operación de la movilidad entre regímenes del Sistema General de Seguridad Social en Salud, atendiendo las condiciones de operación de cada uno de ellos.

Para ello, se estableció como necesario asignar códigos<sup>40</sup> a las Entidades Promotoras de Salud (EPS), indistintamente del régimen de aseguramiento que administren y a las Cajas de Compensación Familiar (CCF), con programas del régimen contributivo o subsidiado, con el que se identificarán a efectos de dar cumplimiento al registro de la información de recaudo de cotizaciones en salud, a través del mecanismo de la Planilla Integrada de Liquidación de Aportes (PILA); acceder al reconocimiento de la Unidad de Pago por Capitación (UPC), según el régimen y; realizar el pago de las prestaciones económicas y de las tecnologías en salud no cubiertas por el Plan Obligatorio de Salud.

Según el reporte, los afiliados al régimen contributivo crecieron en este periodo en un 3,03% y la mayoría de EPS aumentaron sus usuarios, destacándose como los más elevados Sura EPS (16,96%) y Sanitas (12,6%). SaludCoop con 4.164.162 se constituyó como la EPS con el mayor número de afiliados, cifra que se elevó a 5.406.672 si se reúnen como grupo (SaludCoop, Cafesalud y Cruz Blanca) (Tabla 16).

Tabla 16.  
Número de afiliados en el régimen contributivo  
Periodo 2013 – 2014

|                                        | 2013       |         | 2014       |         | Variación % |
|----------------------------------------|------------|---------|------------|---------|-------------|
|                                        | N° Tutelas | Part. % | N° Tutelas | Part. % |             |
| Saludcoop                              | 4.008.804  | 19,89   | 4.164.162  | 20,06   | 3,88        |
| Cooimea                                | 2.918.361  | 14,48   | 2.957.208  | 14,24   | 1,33        |
| Nueva EPS                              | 2.663.554  | 13,22   | 2.755.618  | 13,27   | 3,46        |
| Salud Total                            | 1.984.317  | 9,85    | 2.144.020  | 10,33   | 8,05        |
| Sura EPS                               | 1.675.923  | 8,32    | 1.960.080  | 9,44    | 16,96       |
| Famisanar                              | 1.553.653  | 7,71    | 1.581.000  | 7,62    | 1,76        |
| Sánitas                                | 1.156.981  | 5,74    | 1.302.774  | 6,28    | 12,60       |
| Compensar                              | 940.364    | 4,67    | 1.031.399  | 4,97    | 9,68        |
| Servicio Occidental de Salud S.O.S     | 825.683    | 4,10    | 880.083    | 4,24    | 6,59        |
| Cafesalud                              | 717.405    | 3,56    | 698.540    | 3,36    | -2,63       |
| Cruz Blanca                            | 555.836    | 2,76    | 543.970    | 2,62    | -2,13       |
| Comfenalco Valle                       | 307.799    | 1,53    | 315.428    | 1,52    | 2,48        |
| Aliansalud                             | 298.136    | 1,48    | 243.670    | 1,17    | -18,27      |
| Saludvida                              | 79.926     | 0,40    | 72.006     | 0,35    | -9,91       |
| Golden Group EPS                       | 62.186     | 0,31    | 43.444     | 0,21    | -30,14      |
| Comfenalco Antioquia                   | 342.036    | 1,70    | 0          | 0,00    | -100,00     |
| EPS del Régimen Subsidiado (Movilidad) | 0          | 0,00    | 9.921      | 0,05    | -           |
| Otras                                  | 59.302     | 0,29    | 56.800     | 0,27    | -4,22       |
| Total                                  | 20.150.266 | 100,00  | 20.760.123 | 100,00  | 3,03        |

Fuente: Corte Constitucional  
Cálculos: Defensoría del Pueblo

40 Resolución 3797 de 8 de septiembre de 2014

A pesar de no contar con el mayor número de afiliados, la Nueva EPS se constituyó en 2014 como la entidad más tutelada de este régimen con 13.746 acciones, presentando un incremento del 19,32% con relación a 2013. En segundo lugar se ubicó Coomeva con 13.041 acciones y una disminución de 7,97% y en una tercera posición estuvo SaludCoop con 12.374 acciones y un incremento de 20,46 (Tabla 17).

Tabla 17.  
Tutelas en salud, según tipo de entidad demandada  
Periodo 2013 – 2014

|                                    | 2013       |         | 2014       |         | Variación % |
|------------------------------------|------------|---------|------------|---------|-------------|
|                                    | Nº Tutelas | Part. % | Nº Tutelas | Part. % |             |
| Nueva EPS                          | 11.294     | 20,71   | 13.476     | 23,13   | 19,32       |
| Coomeva                            | 14.170     | 25,99   | 13.041     | 22,38   | -7,97       |
| Saludcoop                          | 10.272     | 18,84   | 12.374     | 21,24   | 20,46       |
| Salud Total                        | 4.529      | 8,31    | 5.285      | 9,07    | 16,69       |
| Sura EPS                           | 2.855      | 5,24    | 3.256      | 5,59    | 14,05       |
| Servicio Occidental de Salud S.O.S | 2.769      | 5,08    | 2.974      | 5,10    | 7,40        |
| Sánitas                            | 1.915      | 3,51    | 2.189      | 3,76    | 14,31       |
| Famisanar                          | 1.589      | 2,91    | 1.408      | 2,42    | -11,39      |
| Cruz Blanca                        | 861        | 1,58    | 933        | 1,60    | 8,36        |
| Comfenalco Antioquia               | 1.610      | 2,95    | 793        | 1,36    | -50,75      |
| Aliansalud                         | 969        | 1,78    | 718        | 1,23    | -25,90      |
| Compensar                          | 642        | 1,18    | 711        | 1,22    | 10,75       |
| Comfenalco Valle                   | 685        | 1,26    | 614        | 1,05    | -10,36      |
| Golden Group EPS                   | 314        | 0,58    | 485        | 0,83    | 54,46       |
| Otras                              | 49         | 0,09    | 7          | 0,01    | -85,71      |
| Total                              | 54.523     | 100,00  | 58.264     | 100,00  | 6,86        |

Fuente: Corte Constitucional  
Cálculos: Defensoría del Pueblo

Para eliminar la correlación positiva, número de afiliados-número de tutelas, y establecer un indicador que permita realizar comparaciones entre EPS más cercanas a la realidad, se calculó el indicador “Número de tutelas por cada 10.000 afiliados” en cada EPS, que arrojó que las EPS con los indicadores más altos fueron en su orden Golden Group, Nueva EPS, Coomeva, Servicio Occidental de salud –SOS - y SaludCoop. Los indicadores más bajos se observaron en Compensar, Famisanar y Sura EPS (Tabla 18).

Tabla 18.  
Número de tutelas por cada 10.000 afiliados  
EPS que prestan servicio únicamente en el régimen contributivo  
Periodo 1999 – 2014

|                                  | Periodo |      |      |      |      |      |      |      |      |      |      |      |      |      |      |       |
|----------------------------------|---------|------|------|------|------|------|------|------|------|------|------|------|------|------|------|-------|
|                                  | 1999    | 2000 | 2001 | 2002 | 2003 | 2004 | 2005 | 2006 | 2007 | 2008 | 2009 | 2010 | 2011 | 2012 | 2013 | 2014  |
| Golden Group EPS                 | -       | -    | -    | -    | -    | -    | -    | -    | -    | -    | -    | 1,8  | 10,4 | 27,6 | 50,5 | 111,6 |
| Nueva Eps                        | -       | -    | -    | -    | -    | -    | -    | -    | -    | 5,3  | 47,2 | 41,2 | 38,2 | 40,9 | 42,4 | 48,9  |
| Coomeva                          | -       | -    | -    | -    | -    | -    | 29,4 | 34,7 | 36,9 | 55,0 | 33,7 | 37,8 | 44,3 | 44,8 | 48,6 | 44,1  |
| Servicio Occidental de Salud SOS | 2,1     | 3,4  | 5,5  | 10,1 | 11,8 | 15,3 | 25,1 | 31,1 | 30,0 | 48,2 | 23,6 | 14,6 | 29,0 | 35,1 | 33,5 | 33,8  |
| Saludcoop                        | 3,4     | 3,0  | 5,6  | 8,1  | 12,4 | 22,1 | 27,6 | 31,9 | 30,7 | 33,0 | 13,0 | 12,6 | 17,3 | 24,1 | 25,6 | 29,7  |
| Aliansalud                       | 4,5     | 8,1  | 6,9  | 13,3 | 17,6 | 21,7 | 32,8 | 32,3 | 32,8 | 47,8 | 15,0 | 15,4 | 18,4 | 22,5 | 32,5 | 29,5  |
| Salud Total                      |         |      |      |      |      |      |      |      |      |      |      |      |      | 22,4 | 22,8 | 24,6  |
| Comfenalco Valle                 | 3,4     | 2,6  | 4,1  | 5,6  | 8,6  | 13,6 | 17,1 | 24,8 | 28,5 | 42,5 | 38,1 | 30,0 | 21,6 | 21,2 | 22,3 | 19,5  |
| Cruz Blanca                      | 1,9     | 2,2  | 3,7  | 6,3  | 11,3 | 20,2 | 23,5 | 28,0 | 27,7 | 23,8 | 8,8  | 7,3  | 8,6  | 12,0 | 15,5 | 17,2  |
| Sánitas                          | 2,8     | 3,4  | 5,5  | 10,1 | 12,0 | 33,9 | 56,4 | 54,0 | 46,6 | 49,1 | 19,6 | 18,2 | 11,7 | 14,7 | 16,6 | 16,8  |
| Susalud-Sura                     | 3,5     | 5,5  | 9,3  | 13,2 | 14,3 | 17,6 | 24,9 | 30,0 | 34,7 | 50,1 | 15,7 | 12,3 | 12,2 | 14,9 | 17,0 | 16,6  |
| Famisanar                        | 1,5     | 2,2  | 3,1  | 5,6  | 7,2  | 7,8  | 13,0 | 18,8 | 20,7 | 23,6 | 10,6 | 7,1  | 7,4  | 8,9  | 10,2 | 8,9   |
| Compensar                        | 1,4     | 1,9  | 2,2  | 4,5  | 7,1  | 10,1 | 14,0 | 19,0 | 22,9 | 23,2 | 11,3 | 8,1  | 5,4  | 5,4  | 6,8  | 6,9   |
| Comfenalco Antioquia             |         |      |      |      |      |      |      |      |      |      |      |      |      | 56,2 | 47,1 | -     |
| Salud Colpatria                  | 1,3     | 4,1  | 17,6 | 17,0 | 20,9 | 26,9 | 32,7 | 42,7 | 43,3 | 51,4 | 18,8 | 10,3 | 10,8 | 11,8 | -    | -     |

Fuente: Corte Constitucional  
Cálculos: Defensoría del Pueblo

### 3.2.5.2. EPS que prestan servicios únicamente en el régimen subsidiado.

Según información suministrada por el Ministerio de Salud y Protección Social, el número de afiliados a este régimen a 31 de diciembre de 2014 era de 22.882.669, distribuidos en 35 EPS-S que continuaban prestando los servicios de salud en esa fecha. Hay que anotar que en esta cifra se encuentran contabilizados 305.499 usuarios de movilidad del régimen contributivo, tal como lo estableció el Decreto 3047 de 2013 y la Resolución 2635 de 2014.

Caprecom con 3.317.658 afiliados se constituyó como la EPS-S con el mayor número de usuarios en este régimen, aunque en el último año disminuyó el número de afiliados en 6% (Tabla 19).

Tabla 19.  
Número de afiliados en el régimen subsidiado  
Periodo 2013 – 2014

|                                                       | 2013       |         | 2014       |         | Variación % |
|-------------------------------------------------------|------------|---------|------------|---------|-------------|
|                                                       | N° Tutelas | Part. % | N° Tutelas | Part. % |             |
| Caprecom                                              | 3.529.943  | 15,57   | 3.317.658  | 14,50   | -6,01       |
| Comfama                                               | 1.700.914  | 7,50    | 1.695.023  | 7,41    | -0,35       |
| Emssanar                                              | 1.681.620  | 7,42    | 1.655.668  | 7,24    | -1,54       |
| Coosalud                                              | 1.597.084  | 7,05    | 1.641.170  | 7,17    | 2,76        |
| Asociación Mutual La Esperanza "Asmet Salud"          | 1.652.908  | 7,29    | 1.611.696  | 7,04    | -2,49       |
| Comparta                                              | 1.607.818  | 7,09    | 1.592.773  | 6,96    | -0,94       |
| Saludvida *                                           | 1.252.371  | 5,52    | 1.335.111  | 5,83    | 6,61        |
| Asociación Mutual ser                                 | 1.133.685  | 5,00    | 1.169.151  | 5,11    | 3,13        |
| Capitalsalud                                          | 1.043.970  | 4,61    | 1.066.145  | 4,66    | 2,12        |
| Cafesalud *                                           | 1.010.815  | 4,46    | 1.016.917  | 4,44    | 0,60        |
| Asociación Mutual Barrios Unidos de Quibdó            | 835.487    | 3,69    | 847.844    | 3,71    | 1,48        |
| Comfacor                                              | 564.269    | 2,49    | 561.813    | 2,46    | -0,44       |
| Cajacopi                                              | 498.878    | 2,20    | 556.074    | 2,43    | 11,46       |
| Comfamiliar Huila                                     | 533.345    | 2,35    | 491.023    | 2,15    | -7,94       |
| Emdis Salud                                           | 469.841    | 2,07    | 490.825    | 2,14    | 4,47        |
| Asociación Indígena del Cauca                         | 419.522    | 1,85    | 436.133    | 1,91    | 3,96        |
| Convida                                               | 362.529    | 1,60    | 358.364    | 1,57    | -1,15       |
| Mallamas EPSI                                         | 274.795    | 1,21    | 289.003    | 1,26    | 5,17        |
| Empresa Cooperativa Solidaria de Salud "Ecoopsos"     | 308.549    | 1,36    | 279.304    | 1,22    | -9,48       |
| Asociación de Cabildos Indígenas del Cesar "Dusakawi" | 242.981    | 1,07    | 248.696    | 1,09    | 2,35        |
| Comfamiliar Cartagena                                 | 238.291    | 1,05    | 238.993    | 1,04    | 0,29        |
| Manexka                                               | 227.566    | 1,00    | 226.866    | 0,99    | -0,31       |
| Comfamiliar de Nariño                                 | 170.505    | 0,75    | 178.281    | 0,78    | 4,56        |
| Cafam                                                 | 190.124    | 0,84    | 174.845    | 0,76    | -8,04       |
| Capresoca                                             | 145.917    | 0,64    | 145.423    | 0,64    | -0,34       |
| Comfamiliar de la Guajira                             | 126.938    | 0,56    | 126.128    | 0,55    | -0,64       |
| Anas Wayuu EPS indígena                               | 117.668    | 0,52    | 120.389    | 0,53    | 2,31        |
| ComfaOriente                                          | 119.044    | 0,53    | 117.131    | 0,51    | -1,61       |
| Comfaboy                                              | 108.214    | 0,48    | 104.503    | 0,46    | -3,43       |
| Comfasucre                                            | 100.100    | 0,44    | 96.923     | 0,42    | -3,17       |
| Colsubsidio/Comfenalco                                | 89.604     | 0,40    | 90.256     | 0,39    | 0,73        |
| Comfachocó                                            | 83.803     | 0,37    | 83.229     | 0,36    | -0,68       |
| PijaoSalud EPSI                                       | 80.818     | 0,36    | 80.178     | 0,35    | -0,79       |
| Unicajas/Comfacundi                                   | 90.818     | 0,40    | 79.571     | 0,35    | -12,38      |
| Comfanorte/Famisalud                                  | 58.772     | 0,26    | 54.035     | 0,24    | -8,06       |
| EPS del Régimen Contributivo (Movilidad)              | 0          | 0,00    | 305.499    | 1,34    | -           |
| Otras                                                 | 37         | 0,00    | 28         | 0,00    | -24,32      |
| Total                                                 | 22.669.543 | 100,00  | 22.882.669 | 100,00  | 0,94        |

Fuente: Ministerio de Salud y Protección Social

\* También prestan servicio en el régimen Contributivo

Caprecom con 10.379 tutelas y una participación del 33,32%, se constituyó como la EPS-S más demandada en este grupo, teniendo un incremento del 11,2% respecto de las acciones de 2013. Le siguió el grupo Comfama conformado por Comfama, Alianza Medellín y Savia (14,45%), Asmet Salud (10,67%), Emssanar (8,32%) y Comparta (6,5%) (Tabla 20).

Los incrementos porcentuales más altos se observaron en las EPS-S Comfachocó, Comfamiliar Huila, Comfamiliar Cartagena, Asmet Salud y Comfacor. Por otro lado, Colsubsidio, Capresoca, Comfacundi, Dusakawi y Comfamiliar Guajira fueron las EPS-S en la que se observaron disminuciones significativas en el número de tutelas.

Tabla 20.  
Tutelas en salud en régimen subsidiado, según entidad demandada  
Periodo 2013 – 2014

|                                                       | 2013       |         | 2014       |         | Variación % |
|-------------------------------------------------------|------------|---------|------------|---------|-------------|
|                                                       | Nº Tutelas | Part. % | Nº Tutelas | Part. % |             |
| Caprecom                                              | 9.332      | 33,16   | 10.379     | 33,32   | 11,22       |
| Comfama/Alianza Medellín/Savia                        | 3.720      | 13,22   | 4.502      | 14,45   | 21,02       |
| Asociación Mutual La Esperanza "Asmet Salud"          | 2.326      | 8,27    | 3.325      | 10,67   | 42,95       |
| Emssanar                                              | 1.979      | 7,03    | 2.593      | 8,32    | 31,03       |
| Comparta                                              | 1.551      | 5,51    | 2.026      | 6,50    | 30,63       |
| Capitalsalud                                          | 1.090      | 3,87    | 1.142      | 3,67    | 4,77        |
| Comfamiliar Huila                                     | 611        | 2,17    | 1.043      | 3,35    | 70,70       |
| Coosalud                                              | 1.127      | 4,00    | 1.027      | 3,30    | -8,87       |
| Empresa Cooperativa Solidaria de Salud "Ecoopsos"     | 817        | 2,90    | 615        | 1,97    | -24,72      |
| Emdis Salud                                           | 558        | 1,98    | 539        | 1,73    | -3,41       |
| Comfacor                                              | 398        | 1,41    | 536        | 1,72    | 34,67       |
| Cajacopi                                              | 404        | 1,44    | 483        | 1,55    | 19,55       |
| Convida                                               | 604        | 2,15    | 478        | 1,53    | -20,86      |
| Asociación Mutual Barrios Unidos de Quibdó            | 435        | 1,55    | 458        | 1,47    | 5,29        |
| Asociación Mutual ser                                 | 420        | 1,49    | 356        | 1,14    | -15,24      |
| Comfamiliar Cartagena                                 | 125        | 0,44    | 194        | 0,62    | 55,20       |
| Comfamiliar de Nariño                                 | 170        | 0,60    | 172        | 0,55    | 1,18        |
| Cafam                                                 | 157        | 0,56    | 157        | 0,50    | 0,00        |
| Comfaboy                                              | 132        | 0,47    | 131        | 0,42    | -0,76       |
| Mallamas EPSI                                         | 117        | 0,42    | 119        | 0,38    | 1,71        |
| ComfaOriente                                          | 168        | 0,60    | 115        | 0,37    | -31,55      |
| Asociación de Cabildos Indígenas del Cesar "Dusakawi" | 161        | 0,57    | 102        | 0,33    | -36,65      |
| Comfachocó                                            | 49         | 0,17    | 96         | 0,31    | 95,92       |
| Asociación Indígena del Cauca                         | 87         | 0,31    | 86         | 0,28    | -1,15       |
| Colsubsidio/Comfenalco                                | 179        | 0,64    | 82         | 0,26    | -54,19      |
| Capresoca                                             | 133        | 0,47    | 79         | 0,25    | -40,60      |
| Unicajas/Comfacundi                                   | 115        | 0,41    | 72         | 0,23    | -37,39      |
| Comfasucre                                            | 54         | 0,19    | 55         | 0,18    | 1,85        |
| PijaoSalud EPSI                                       | 51         | 0,18    | 46         | 0,15    | -9,80       |
| Comfanorte/Famisalud                                  | 60         | 0,21    | 46         | 0,15    | -23,33      |
| Manexka                                               | 33         | 0,12    | 31         | 0,10    | -6,06       |
| Selvasalud *                                          | 270        | 0,96    | 24         | 0,08    | -91,11      |
| Comfamiliar de la Guajira                             | 36         | 0,13    | 23         | 0,07    | -36,11      |
| Anas Wayuu EPS indígena                               | 8          | 0,03    | 9          | 0,03    | 12,50       |
| Cóndor *                                              | 630        | 2,24    | 6          | 0,02    | -99,05      |
| Otras                                                 | 34         | 0,12    | 1          | 0,00    | -97,06      |
| Total                                                 | 28.141     | 100,00  | 31.148     | 100,00  | 10,69       |

Fuente: Corte Constitucional  
Cálculos: Defensoría del Pueblo  
\* En liquidación

## La tutela y los derechos a la salud y a la seguridad social 2014

Al aplicar el indicador número de tutelas por cada 10.000 afiliados, las EPS-S Caprecom, Comfama, Ecoopsos, Comfamiliar Huila, y Asmet Salud tuvieron las cifras más altas. A excepción de Ecoopsos, las demás incrementaron este indicador (Tabla 21).

Tabla 21.  
Número de tutelas por cada 10.000 afiliados  
EPS que prestan servicio únicamente en el régimen subsidiado  
Periodo 2003 – 2014

|                                                       | Periodo |      |      |      |      |      |      |      |      |      |      |      |
|-------------------------------------------------------|---------|------|------|------|------|------|------|------|------|------|------|------|
|                                                       | 2003    | 2004 | 2005 | 2006 | 2007 | 2008 | 2009 | 2010 | 2011 | 2012 | 2013 | 2014 |
| Caprecom                                              | -       | -    | -    | 5,5  | 5,4  | 8,2  | 14,1 | 19,7 | 23,7 | 27,1 | 26,4 | 31,3 |
| Comfama/Alianza Medellín/Savia                        | 5,7     | 6,5  | 9,7  | 9,3  | 14,3 | 18,8 | 21,1 | 15,2 | 17,5 | 17,0 | 21,9 | 26,6 |
| Empresa Cooperativa Solidaria de Salud "Ecoopsos"     | 2,5     | 3,4  | 5,5  | 5,4  | 9,3  | 13,6 | 15,8 | 12,4 | 15,3 | 40,6 | 26,5 | 22,0 |
| Comfamiliar Huila                                     | -       | -    | 0,3  | 1,3  | 2,9  | 5,4  | 5,3  | 6,0  | 9,3  | 8,6  | 11,5 | 21,2 |
| Asociación Mutual La Esperanza "Asmet Salud"          | 1,7     | 3,3  | 3,7  | 5,5  | 10,8 | 13,0 | 15,7 | 13,8 | 14,1 | 14,7 | 14,1 | 20,6 |
| Emssanar                                              | 2,7     | 2,9  | 3,1  | 3,6  | 6,7  | 11,1 | 8,9  | 10,6 | 17,6 | 15,8 | 11,8 | 15,7 |
| Convinda                                              | 0,6     | 0,5  | 1,9  | 1,5  | 2,3  | 3,7  | 4,8  | 4,8  | 7,8  | 12,1 | 16,7 | 13,3 |
| Comparta                                              | 1,1     | 1,3  | 1,7  | 1,8  | 2,5  | 4,3  | 6,4  | 5,8  | 8,1  | 9,5  | 9,6  | 12,7 |
| Comfaboy                                              | -       | -    | 0,2  | 0,8  | 2,9  | 5,2  | 8,8  | 8,2  | 10,3 | 14,6 | 12,2 | 12,5 |
| Comfachocó                                            | -       | -    | 1,9  | 3,2  | 5,6  | 13,2 | 11,4 | 4,8  | 6,1  | 4,4  | 5,8  | 11,5 |
| Emdis Salud                                           | 1,0     | 1,0  | 1,6  | 2,4  | 4,8  | 11,7 | 14,2 | 14,5 | 15,3 | 25,5 | 11,9 | 11,0 |
| Capital Salud                                         | -       | -    | -    | -    | -    | -    | -    | -    | -    | 5,3  | 10,4 | 10,7 |
| ComfaOriente                                          | -       | -    | 2,2  | 10,1 | 6,5  | 7,3  | 5,7  | 12,8 | 19,6 | 18,0 | 14,1 | 9,8  |
| Comfamiliar de Nariño                                 | -       | -    | 0,4  | 1,1  | 2,9  | 6,0  | 9,6  | 11,7 | 9,4  | 8,7  | 10,0 | 9,6  |
| Comfacor                                              | 1,0     | 2,4  | 2,6  | 3,1  | 2,8  | 6,6  | 7,0  | 5,1  | 6,4  | 7,3  | 7,1  | 9,5  |
| Colsubsidio/Comfenalco                                | -       | -    | 0,3  | 3,2  | 5,7  | 6,0  | 7,1  | 7,2  | 9,9  | 40,9 | 20,0 | 9,1  |
| Comfacundi-Unicajas                                   | -       | -    | 0,3  | 1,9  | 3,2  | 6,2  | 6,7  | 4,7  | 8,6  | 7,6  | 12,7 | 9,0  |
| Cafam                                                 | 1,0     | 2,1  | 2,0  | 2,4  | 11,4 | 4,8  | 6,1  | 5,1  | 7,6  | 8,1  | 8,3  | 9,0  |
| Cajacopi                                              | 1,4     | 0,0  | 2,4  | 3,3  | 3,2  | 5,3  | 3,8  | 9,5  | 10,0 | 8,3  | 8,1  | 8,7  |
| Comfanorte                                            | -       | -    | 2,2  | 5,3  | 5,8  | 6,9  | 10,7 | 12,9 | 16,6 | 29,8 | 10,2 | 8,5  |
| Comfamiliar Cartagena                                 | 0,6     | 1,0  | 0,7  | 0,6  | 2,5  | 3,8  | 4,3  | 2,0  | 3,5  | 3,2  | 5,2  | 8,1  |
| Coosalud                                              | 2,5     | 2,9  | 4,2  | 3,8  | 5,7  | 8,0  | 7,8  | 5,9  | 8,0  | 8,1  | 7,1  | 6,3  |
| PijaoSalud EPSI                                       | 0,0     | 1,0  | 1,5  | 5,2  | 5,7  | 7,7  | 4,9  | 4,9  | 6,7  | 6,1  | 6,3  | 5,7  |
| Comfasucre                                            | -       | -    | 0,6  | 0,3  | 2,7  | 1,7  | 3,4  | 3,5  | 4,2  | 4,6  | 5,4  | 5,7  |
| Capresoca                                             | -       | -    | -    | 0,9  | 0,8  | 1,2  | 1,3  | 3,3  | 5,1  | 14,0 | 9,1  | 5,4  |
| Asociación Mutual Barrios Unidos de Quibdó            | 0,9     | 0,8  | 1,1  | 0,9  | 1,2  | 1,5  | 3,7  | 4,2  | 4,9  | 3,8  | 5,2  | 5,4  |
| Mallamas EPSI                                         | 1,5     | 0,9  | 1,2  | 1,1  | 4,5  | 6,6  | 7,1  | 7,3  | 5,8  | 5,5  | 4,3  | 4,1  |
| Asociación de Cabildos Indígenas del Cesar "Dusakawi" | 0,1     | 0,1  | 0,1  | 0,6  | 0,6  | 1,2  | 2,1  | 2,3  | 3,0  | 4,5  | 6,6  | 4,1  |
| Asociación Mutual Ser                                 | 0,6     | 1,2  | 1,4  | 1,4  | 2,3  | 4,6  | 7,3  | 5,3  | 4,9  | 4,9  | 3,7  | 3,0  |
| Asociación Indígena del Cauca                         | 0,1     | 0,3  | 0,2  | 0,9  | 1,4  | 1,3  | 0,9  | 1,3  | 2,2  | 2,6  | 2,1  | 2,0  |
| Comfamiliar de la Guajira                             | -       | -    | 0,1  | 0,1  | 1,1  | 1,2  | 1,7  | 1,8  | 1,8  | 2,8  | 2,8  | 1,8  |
| Manexka                                               | 0,3     | 1,1  | 2,7  | 0,3  | 0,5  | 1,6  | 1,5  | 1,0  | 1,1  | 1,7  | 1,5  | 1,4  |
| Anas Wayuu EPS indígena                               | 0,0     | 0,4  | 0,8  | 0,5  | 0,9  | 0,7  | 0,4  | 0,9  | 0,9  | 1,1  | 0,7  | 0,7  |

Fuente: Ministerio de Salud y Protección Social  
Cálculos: Defensoría del Pueblo

### 3.2.5.3. EPS que prestan servicios en los dos regímenes.

Durante 2014, solamente Cafesalud y Saludvida prestaron servicios tanto en el régimen contributivo como en el subsidiado y las dos EPS mencionadas incrementaron el número de tutelas en 16,56% y 49,6% respectivamente (Tabla 22).

Tabla 22.  
Tutelas en entidades que prestan servicios en los dos regímenes  
Periodo 2013 – 2014

|              | 2013       |         | 2014       |         | Variación % |
|--------------|------------|---------|------------|---------|-------------|
|              | Nº Tutelas | Part. % | Nº Tutelas | Part. % |             |
| Cafesalud    | 4.415      | 46,43   | 5.146      | 68,10   | 16,56       |
| Saludvida    | 1.611      | 16,94   | 2.410      | 31,90   | 49,60       |
| Solsalud     | 2.497      | 26,26   | 0          | 0,00    | -100,00     |
| Humana Vivir | 985        | 10,36   | 0          | 0,00    | -100,00     |
| Total        | 9.508      | 100,00  | 7.556      | 100,00  | -20,53      |

Fuente: Corte Constitucional  
Cálculos: Defensoría del Pueblo

Al aplicar el indicador número de tutelas por cada 10.000 afiliados en los dos regímenes, tanto Cafesalud como Saludvida incrementaron su valor ubicándose en 30 y 17,1 tutelas por cada diez mil afiliados respectivamente. (Tabla 23).

Tabla 23.  
Número de tutelas por cada 10.000 afiliados  
EPS que prestan servicio en los dos regímenes  
Periodo 2003 – 2014

|                        | Periodo |      |      |      |      |      |      |      |      |      |      |      |
|------------------------|---------|------|------|------|------|------|------|------|------|------|------|------|
|                        | 2003    | 2004 | 2005 | 2006 | 2007 | 2008 | 2009 | 2010 | 2011 | 2012 | 2013 | 2014 |
| Cafesalud              | 18,3    | 23,4 | 24,2 | 25,3 | 27,9 | 27,8 | 15,5 | 14,5 | 23,8 | 31,5 | 25,6 | 30,0 |
| Saludvida              | 5,5     | 8,7  | 10,1 | 10,0 | 9,8  | 16,2 | 23,1 | 19,8 | 19,1 | 15,7 | 12,1 | 17,1 |
| Humana Vivir*          | 10,1    | 12,1 | 20,0 | 19,6 | 22,4 | 30,5 | 28,8 | 19,3 | 23,9 | 24,2 | -    | -    |
| Solsalud*              | 5,8     | 10,2 | 12,7 | 13,3 | 15,1 | 19,8 | 14,0 | 14,7 | 19,7 | 23,1 | -    | -    |
| Comfenalco Antioquia * | 13,3    | 14,4 | 15,7 | 16,6 | 19,2 | 27,5 | 32,3 | 21,5 | 22,9 | -    | -    | -    |
| Salud Total*           | 12,1    | 15,9 | 19,8 | 22,0 | 24,9 | 31,6 | 14,5 | 12,1 | 15,8 | -    | -    | -    |

Fuente: Corte Constitucional, Ministerio de Salud y Protección Social  
Cálculos: Defensoría del Pueblo

\* Dejaron de prestar servicios en 2012 y 2013

Las gráficas 3 y 4 muestran el número de tutelas por cada 10.000 afiliados para todas la EPS que prestan servicios tanto en el régimen contributivo como en el subsidiado. En 2014, los cuatro (4) indicadores más altos corresponden a EPS del régimen contributivo (Golden Group, Nueva EPS, Coomeva y Servicio Occidental de Salud) mientras que la primera EPS del régimen subsidiado se ubica en el quinto lugar (Gráfica 4), es de anotar que la EPS Golden Group fue liquidada a comienzo de 2015.

Gráfica 3.  
Número de tutelas por cada 10.000 afiliados en cada EPS en 2013

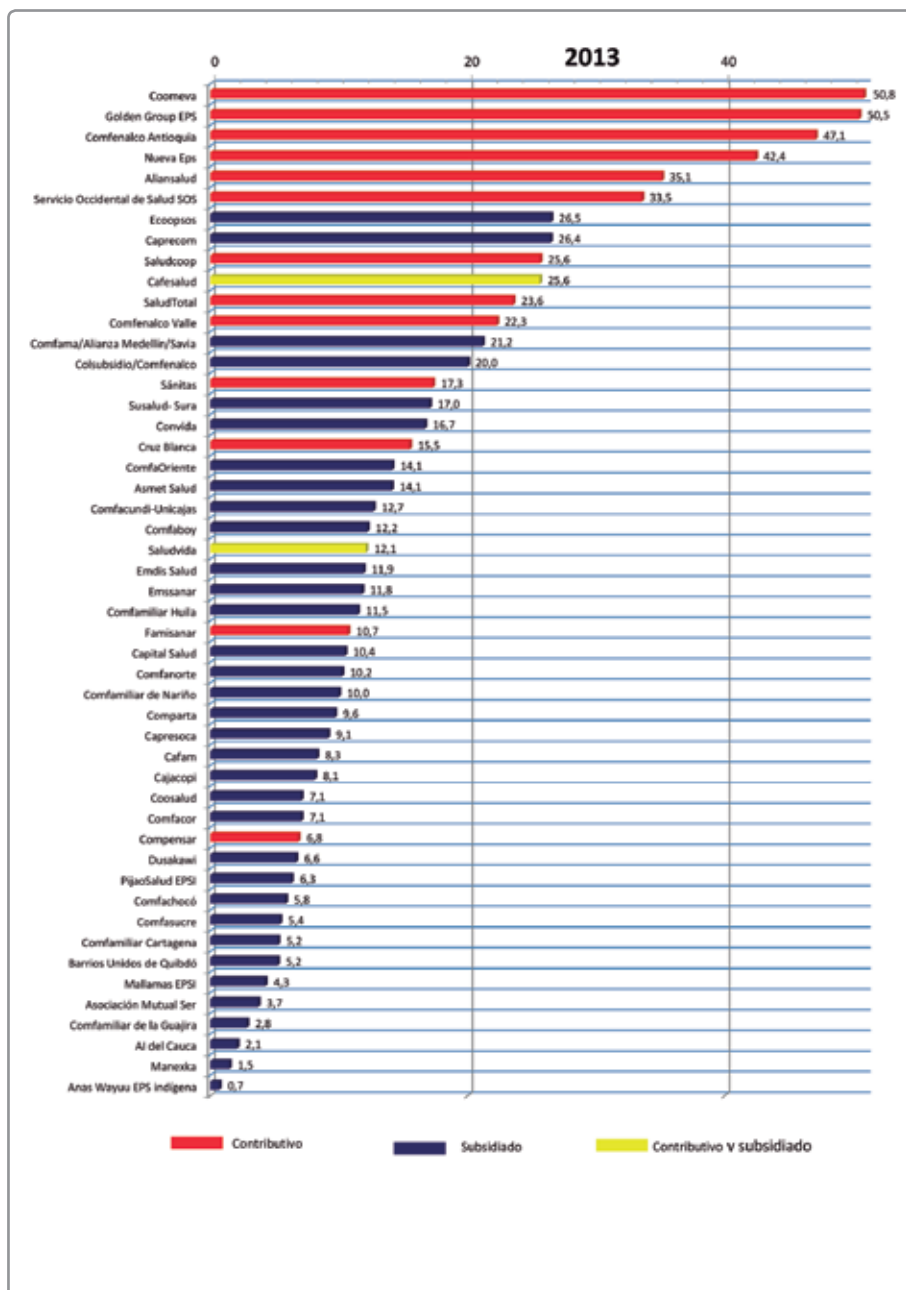

Gráfica 4.  
Número de tutelas por cada 10.000 afiliados en cada EPS en 2014

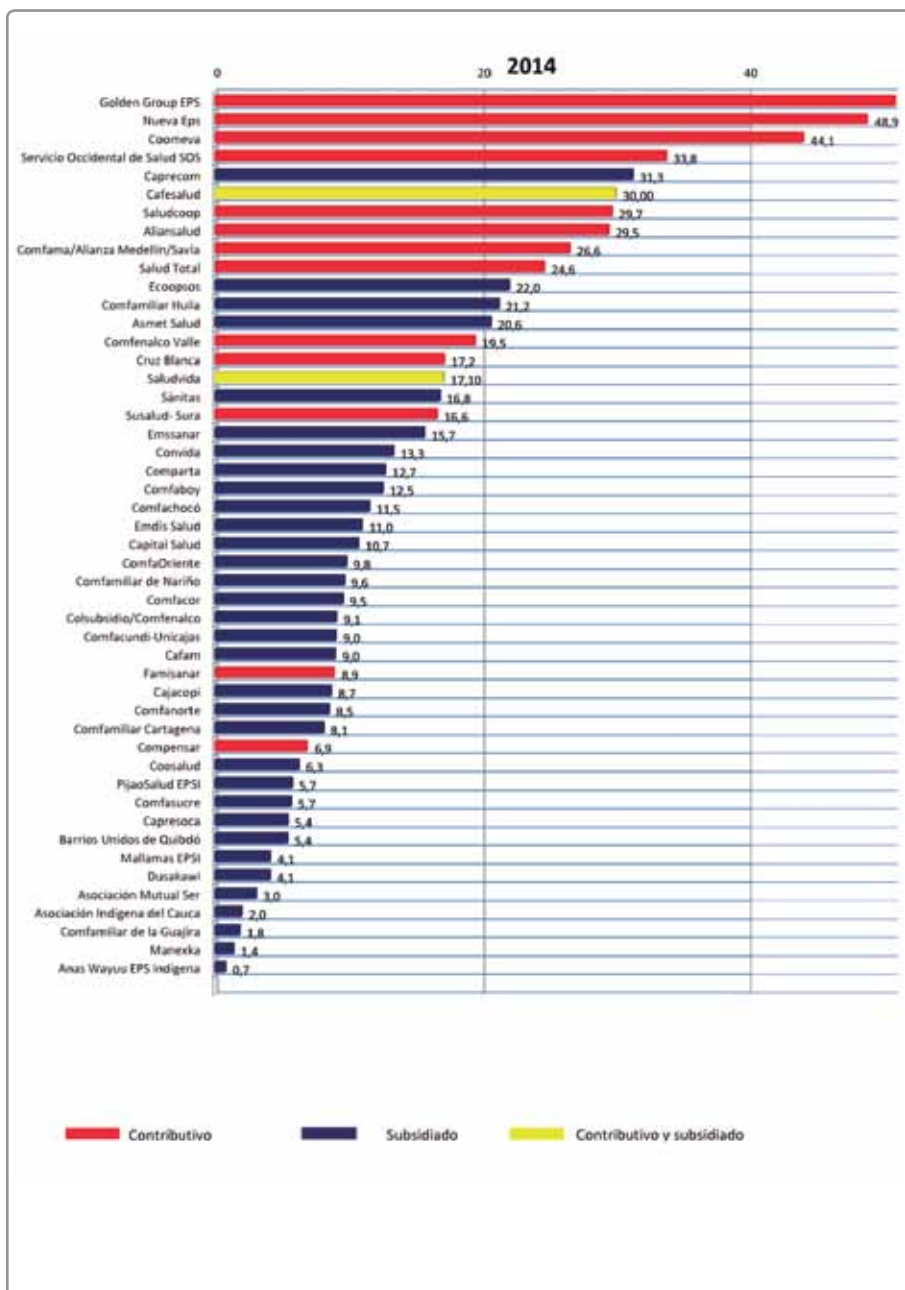

### 3.2.5.4. Tutelas contra Entidades territoriales.

Durante 2014, las tutelas contra los Entidades territoriales disminuyeron en un 22,3%, tal como ha sucedido en los dos años anteriores en razón al direccionamiento de las mismas a las EPS-S del régimen subsidiado. No obstante, dentro del grupo, las secretarías de salud fueron las más tuteladas con el 74,85%, seguidas de las Alcaldías municipales con 16,8%(Tabla 24).

La Secretaría de salud de Medellín tuvo el mayor número de tutelas (18,3%). Le siguieron las secretarías de salud de Bogotá (13%), Envigado (11,3%), Itagüí (8,3%), y Manizales (4,5%). A nivel de alcaldías las más tuteladas fueron Bogotá, Medellín, Cali, Manizales y Cúcuta.

Tabla 24.  
Tutelas en salud contra entidades territoriales  
Periodo 2013 – 2014

|                                           | 2013       |         | 2014       |         | Variación<br>% |
|-------------------------------------------|------------|---------|------------|---------|----------------|
|                                           | Nº Tutelas | Part. % | Nº Tutelas | Part. % |                |
| Secretarías de Salud/Direcciones de salud | 4.786      | 78,19   | 3.560      | 74,85   | -25,62         |
| Alcaldías                                 | 817        | 13,35   | 799        | 16,80   | -2,20          |
| Secretarías de Educación                  | 282        | 4,61    | 250        | 5,26    | -11,35         |
| Gobernaciones                             | 236        | 3,86    | 147        | 3,09    | -37,71         |
| Total                                     | 6.121      | 100,00  | 4.756      | 100,00  | -22,30         |

Fuente: Corte Constitucional  
Cálculos: Defensoría del Pueblo

### 3.2.5.5. Tutelas contra Instituciones Prestadoras de Salud -IPS.

Las tutelas contra las IPS (hospitales, clínicas y centros de salud) disminuyeron en 13,03% respecto de 2013. La fundación médica preventiva con 25,68% fue la IPS con más tutelas en el periodo, seguida de Cosmitet (15,22%), Clínica General del Norte (4,58%), Emcosalud (3,37%) y UT Medicol (3,26%) (Tabla 25), siendo varias de estas IPS las encargadas de atender a los docentes en el país.

Tabla 25.  
Tutelas en salud contra IPS  
Periodo 2013 – 2014

|                                                    | 2013       |         | 2014       |         | Variación % |
|----------------------------------------------------|------------|---------|------------|---------|-------------|
|                                                    | N° Tutelas | Part. % | N° Tutelas | Part. % |             |
| Fundación Médico Preventiva                        | 1.054      | 23,56   | 999        | 25,68   | -5,22       |
| Cosmitet                                           | 699        | 15,63   | 592        | 15,22   | -15,31      |
| Clínica General del Norte/Unión Temporal del Norte | 223        | 4,99    | 178        | 4,58    | -20,18      |
| Emcosalud                                          | 88         | 1,97    | 131        | 3,37    | 48,86       |
| UT Medicol                                         | 106        | 2,37    | 127        | 3,26    | 19,81       |
| Médicos Asociados                                  | 164        | 3,67    | 127        | 3,26    | -22,56      |
| Servimédicos                                       | 81         | 1,81    | 102        | 2,62    | 25,93       |
| Avanzar Médico                                     | 129        | 2,88    | 94         | 2,42    | -27,13      |
| Colombiana de Salud                                | 77         | 1,72    | 76         | 1,95    | -1,30       |
| Hospital Erasmo Meóz                               | 79         | 1,77    | 60         | 1,54    | -24,05      |
| Comfandi                                           | 31         | 0,69    | 32         | 0,82    | 3,23        |
| Medicina Integral                                  | 33         | 0,74    | 32         | 0,82    | -3,03       |
| Instituto Nacional de Cancerología                 | 68         | 1,52    | 32         | 0,82    | -52,94      |
| Hospital de Kennedy                                | 20         | 0,45    | 29         | 0,75    | 45,00       |
| Clínica Peñitas de Sincelajo                       | 21         | 0,47    | 28         | 0,72    | 33,33       |
| Hospital Federico Lleras Acosta                    | 58         | 1,30    | 28         | 0,72    | -51,72      |
| Proinsalud                                         | 28         | 0,63    | 26         | 0,67    | -7,14       |
| Hospital Universitario del Valle                   | 34         | 0,76    | 24         | 0,62    | -29,41      |
| Hospital Universitario de Santander                | 42         | 0,94    | 16         | 0,41    | -61,90      |
| Otras IPS                                          | 1.438      | 32,15   | 1.157      | 29,74   | -19,54      |
| Total                                              | 4.473      | 100,00  | 3.890      | 100,00  | -13,03      |

Fuente: Corte Constitucional  
Cálculos: Defensoría del Pueblo

### 3.2.5.6. Tutelas en salud contra Inpec /penitenciarias.

Como se mencionó en el estudio anterior, con la Ley 1709 de 2014, se creó el Fondo Nacional de Salud de las Personas Privadas de la Libertad, encargado de contratar la prestación de los servicios de salud de todos los centros de reclusión. Por su parte, la Unidad de Servicios Penitenciarios y Carcelario –USPEC– debía adecuar la infraestructura de las Unidades de Atención Primaria y de Atención Inicial de Urgencias en cada uno de los establecimientos para prestar atención en salud intramural, estableciendo que mientras entraba en funcionamiento el modelo de atención, de manera gradual y progresiva, se seguiría garantizando la prestación del servicio de salud en las cárceles de conformidad con las normas aplicables con anterioridad a la entrada en vigencia de la Ley. El Código también abrió la posibilidad para que egresados de los programas de educación superior del

área de la Salud llevaran a cabo su servicio social obligatorio en dichos establecimientos, previa reglamentación del Gobierno. Sin embargo, a la fecha, aún no se ha reglamentado, por lo cual no se está aplicando.

En 2014, las tutelas contra el Inpec o contra las penitenciarías directamente disminuyeron en 24,99%, producto de la mayor interposición de tutelas directamente contra la EPS Caprecom. El mayor número de acciones fueron contra las penitenciarías ubicadas en Bogotá, seguida de Valle del Cauca, Tolima, Caldas y Santander (Tabla 26).

Tabla 26.  
Tutelas en salud contra Inpec/penitenciarías según departamento  
Periodo 2013 – 2014

|                    | 2013       |         | 2014       |         | Variación % |
|--------------------|------------|---------|------------|---------|-------------|
|                    | N° Tutelas | Part. % | N° Tutelas | Part. % |             |
| Bogotá D.C         | 279        | 10,13   | 238        | 11,53   | -14,70      |
| Valle              | 275        | 9,99    | 234        | 11,33   | -14,91      |
| Tolima             | 303        | 11,01   | 229        | 11,09   | -24,42      |
| Caldas             | 176        | 6,39    | 168        | 8,14    | -4,55       |
| Santander          | 198        | 7,19    | 167        | 8,09    | -15,66      |
| Antioquia          | 299        | 10,86   | 167        | 8,09    | -44,15      |
| Cauca              | 236        | 8,57    | 163        | 7,89    | -30,93      |
| Meta               | 198        | 7,19    | 155        | 7,51    | -21,72      |
| Norte de Santander | 178        | 6,47    | 116        | 5,62    | -34,83      |
| Cesar              | 159        | 5,78    | 88         | 4,26    | -44,65      |
| Boyacá             | 131        | 4,76    | 69         | 3,34    | -47,33      |
| Caquetá            | 119        | 4,32    | 53         | 2,57    | -55,46      |
| Cundinamarca       | 51         | 1,85    | 50         | 2,42    | -1,96       |
| Huila              | 17         | 0,62    | 33         | 1,60    | 94,12       |
| Risaralda          | 22         | 0,80    | 24         | 1,16    | 9,09        |
| Casanare           | 25         | 0,91    | 24         | 1,16    | -4,00       |
| Quindío            | 19         | 0,69    | 22         | 1,07    | 15,79       |
| Nariño             | 21         | 0,76    | 13         | 0,63    | -38,10      |
| Atlántico          | 8          | 0,29    | 12         | 0,58    | 50,00       |
| Bolívar            | 8          | 0,29    | 11         | 0,53    | 37,50       |
| Magdalena          | 10         | 0,36    | 9          | 0,44    | -10,00      |
| Otros              | 21         | 0,76    | 20         | 0,97    | -4,76       |
| Total              | 2.753      | 100,00  | 2.065      | 100,00  | -24,99      |

Fuente: Corte Constitucional  
Cálculos: Defensoría del Pueblo

### 3.2.5.7. Tutelas en salud en regímenes de excepción.

Los resultados solo incluyeron las tutelas dirigidas a las Fuerzas Militares y de Policía y Ecopetrol, ya que las acciones contra el magisterio no se interponen directamente contra esta entidad, sino contra las IPS encargadas de la atención de los docentes y sus beneficiarios, mencionadas en el grupo de las IPS.

De esta manera, las tutelas contra las entidades que pertenecen a este grupo se incrementaron en un 28,14% especialmente contra los servicios de salud de las Fuerzas Militares y de Policía, cuya participación fue de 98,17% (Tabla 27).

Tal como se manifestó en el informe anterior, los servicios de salud de las Fuerzas Militares y de Policía vienen con dificultad en los últimos años y así lo demuestra el crecimiento de las tutelas para acceder a dichos servicios, siendo en el último año de 28.02%.

Tabla 27.  
Tutelas en salud contra entidades de régimen especial  
Periodo 2013 – 2014

|                                | 2013       |         | 2014       |         | Variación % |
|--------------------------------|------------|---------|------------|---------|-------------|
|                                | N° Tutelas | Part. % | N° Tutelas | Part. % |             |
| Fuerzas Militares y de Policía | 2.259      | 98,26   | 2.892      | 98,17   | 28,02       |
| Ecopetrol                      | 40         | 1,74    | 54         | 1,83    | 35,00       |
| Total                          | 2.299      | 100,00  | 2.946      | 100,00  | 28,14       |

Fuente: Corte Constitucional  
Cálculos: Defensoría del Pueblo

\* No se incluye al Magisterio

### 3.2.5.8. Tutelas en salud contra Administradoras de Fondos de Pensiones.

Las tutelas en salud contra entidades de este grupo disminuyeron en 4,58%. ISS/Colpensiones fue la entidad con el mayor número de ellas, con ocasión de la no afiliación en salud de los pre-pensionados, mientras le resuelven la situación y su ingreso a la nómina. Durante este periodo los pre-pensionados quedan sin protección en salud, y si quieren acceder a servicios, deben cotizar como independientes. (Tabla 28).

Tabla 28.  
Tutelas en salud contra Administradoras de fondos de pensiones  
Periodo 2013 – 2014

|                                                                   | 2013       |         | 2014       |         | Variación % |
|-------------------------------------------------------------------|------------|---------|------------|---------|-------------|
|                                                                   | N° Tutelas | Part. % | N° Tutelas | Part. % |             |
| ISS/Colpensiones                                                  | 750        | 57,21   | 757        | 60,51   | 0,93        |
| Fondo de Pensiones y Cesantías Porvenir - Horizonte               | 105        | 8,01    | 141        | 11,27   | 34,29       |
| Fiduprevisora                                                     | 148        | 11,29   | 113        | 9,03    | -23,65      |
| Fondo de Pensiones y Cesantías Protección - ING                   | 80         | 6,10    | 108        | 8,63    | 35,00       |
| Fondo de Previsión del Magisterio                                 | 56         | 4,27    | 50         | 4,00    | -10,71      |
| Colfondos-Citi                                                    | 45         | 3,43    | 26         | 2,08    | -42,22      |
| Fondo de Pensiones Públicas FOPE/FONCEP/<br>Fondos territoriales/ | 19         | 1,45    | 12         | 0,96    | -36,84      |
| Cajanal/Buen Futuro                                               | 41         | 3,13    | 6          | 0,48    | -85,37      |
| Otras Administradoras de fondos de pensiones                      | 67         | 5,11    | 38         | 3,04    | -43,28      |
| Total                                                             | 1.311      | 100,00  | 1.251      | 100,00  | -4,58       |

Fuente: Corte Constitucional  
Cálculos: Defensoría del Pueblo

### 3.2.5.9. Tutelas en salud contra Administradoras de Riesgos Laborales y Compañías de seguros.

El número de tutelas que invocaron el derecho a la salud contra las entidades que conforman este grupo se mantuvo en los mismos niveles del año anterior. La ARL Positiva continúa siendo la entidad con el mayor número de acciones con una participación del 47,96% de las mismas (Tabla 29).

Tabla 29.  
Tutelas en salud contra ARL y Compañías de seguros  
Periodo 2013 – 2014

|                             | 2013       |         | 2014       |         | Variación % |
|-----------------------------|------------|---------|------------|---------|-------------|
|                             | Nº Tutelas | Part. % | Nº Tutelas | Part. % |             |
| ARL Positiva                | 663        | 50,30   | 634        | 47,96   | -4,37       |
| Sura/Suratep                | 169        | 12,82   | 212        | 16,04   | 25,44       |
| Compañía de Seguros Colmena | 111        | 8,42    | 109        | 8,25    | -1,80       |
| Seguros de Vida Colpatria   | 104        | 7,89    | 91         | 6,88    | -12,50      |
| Compañía de Seguros Bolívar | 39         | 2,96    | 47         | 3,56    | 20,51       |
| La Equidad Seguros de Vida  | 45         | 3,41    | 43         | 3,25    | -4,44       |
| Liberty Seguros             | 39         | 2,96    | 43         | 3,25    | 10,26       |
| QBE Seguros                 | 37         | 2,81    | 33         | 2,50    | -10,81      |
| Maphre Seguros              | 39         | 2,96    | 30         | 2,27    | -23,08      |
| Seguros del Estado S.A      | 17         | 1,29    | 25         | 1,89    | 47,06       |
| Otras compañías de seguros  | 55         | 4,17    | 55         | 4,16    | 0,00        |
| Total                       | 1.318      | 100,00  | 1.322      | 100,00  | 0,30        |

Fuente: Corte Constitucional  
Cálculos: Defensoría del Pueblo

### 3.2.5.10. Otras entidades demandadas

En esta clasificación se encuentran entidades contra las cuales se interpusieron tutelas que invocaron el derecho a la salud y que no se mencionaron en otros grupos. Sobresalen los ministerios (914), empresas de servicios públicos (406) y las empresas de medicina prepagada (250).

## 3.3. Análisis de los hechos en las tutelas de salud 2014.

El análisis de esta sección se hace sobre una muestra representativa de 3.075 tutelas que invocaron el derecho a la salud en 2014, seleccionada a través de un muestreo aleatorio estratificado por departamento con una confiabilidad del 95% y un margen de error de 1,37%. Los resultados se presentan, utilizando un factor de expansión en función de la misma variable de estratificación. Corresponde el 50,1% al régimen contributivo, el 37,5% al régimen subsidiado y el 12,49% a los demás, en los que se incluyen servicios de salud de las Fuerzas militares y de Policía, y del Magisterio.

La información fue recolectada durante todo el año 2014, en la medida en que iban llegando los expedientes a la Corte Constitucional. Los datos fueron registrados en el formato anexo 1, discriminados los tipos de solicitudes realizadas en cada expediente, de acuerdo al relato del accionante en la tutela seleccionada. La cuantificación se hizo con todas las solicitudes en cada una de las tutelas, en razón de que en una misma acción se podía presentar más de una solicitud con requerimientos diferentes. En promedio, durante 2014 se presentaron 1,97 solicitudes por tutela. El promedio más alto dentro de cada acción fueron solicitudes por exámenes paraclínicos (3,09) seguido de medicamentos (1,70), prótesis e insumos (1,51), imágenes diagnósticas (1,41), citas médicas (1,32), tratamientos (1,31), cirugías (1,26) y procedimientos (1,15).

### 3.3.1. Contenidos más frecuentes en las tutelas de salud

Las distintas solicitudes fueron clasificadas en varios grupos según el requerimiento o servicio médico demandado en la tutela. Adicionalmente se conformaron dos grupos, uno en el que la solicitud estaba relacionada con la atención en salud sin ser un servicio específico de salud y, otro con aquellas peticiones que nada tenían que ver con servicios de salud, pero los usuarios invocaban este derecho como vulnerado (Tabla 30).

Tabla 30.  
Solicitudes más frecuentes en las tutelas de salud  
Periodo 2013 – 2014

|                                     | 2013       |         | 2014       |         | Variación % |
|-------------------------------------|------------|---------|------------|---------|-------------|
|                                     | N° Tutelas | Part. % | N° Tutelas | Part. % |             |
| Tratamientos                        | 60.033     | 26,18   | 55.799     | 23,90   | -7,05       |
| Medicamentos                        | 36.510     | 15,92   | 37.621     | 16,11   | 3,04        |
| Citas médicas                       | 26.303     | 11,47   | 29.038     | 12,44   | 10,40       |
| Prótesis, órtesis e insumos médicos | 20.778     | 9,06    | 23.903     | 10,24   | 15,04       |
| Cirugías                            | 21.587     | 9,41    | 22.308     | 9,55    | 3,34        |
| Imágenes diagnósticas               | 13.699     | 5,97    | 12.654     | 5,42    | -7,63       |
| Exámenes paraclínicos               | 11.001     | 4,80    | 10.716     | 4,59    | -2,59       |
| Procedimientos                      | 3.355      | 1,46    | 2.841      | 1,22    | -15,32      |
| Otras relacionadas con el sistema   | 29.438     | 12,84   | 31.830     | 13,63   | 8,13        |
| Otras                               | 6.596      | 2,88    | 6.763      | 2,90    | 2,53        |
| Total solicitudes                   | 229.300    | 100,00  | 233.473    | 100,00  | 1,82        |
|                                     |            |         |            |         |             |
| Total tutelas en salud              | 115.147    |         | 118.281    |         | 2,72        |

Fuente: Corte Constitucional  
Cálculos: Defensoría del Pueblo

En general, las solicitudes durante 2014, aumentaron en 1,82% con relación a 2013. Respecto a las solicitudes de servicios médicos, los tratamientos fueron las reclamaciones más frecuentes en las tutelas con el 23,9%, presentando una disminución de 7,05%. Le siguieron las solicitudes por medicamentos con el 16,11%, citas médicas especializadas (12,44%); prótesis, órtesis e insumos médicos (10,24%) cirugías (9,55%) imágenes diagnósticas (5,42%), exámenes paraclínicos (4,59%) y procedimientos (1,22%). No obstante, las solicitudes de mayor crecimiento fueron las prótesis, órtesis e insumos médicos y las citas médicas especializadas.

Adicionalmente, hay que mencionar la participación elevada (13,63%) de otras solicitudes que de alguna forma están ligadas a un servicio de salud entre las que sobresalen los viáticos y el transporte, no solo del paciente, sino de su acompañante (Gráfica 5).

Gráfica 5.  
Solicitudes más frecuentes en las tutelas de salud  
Periodo 2013 – 2014

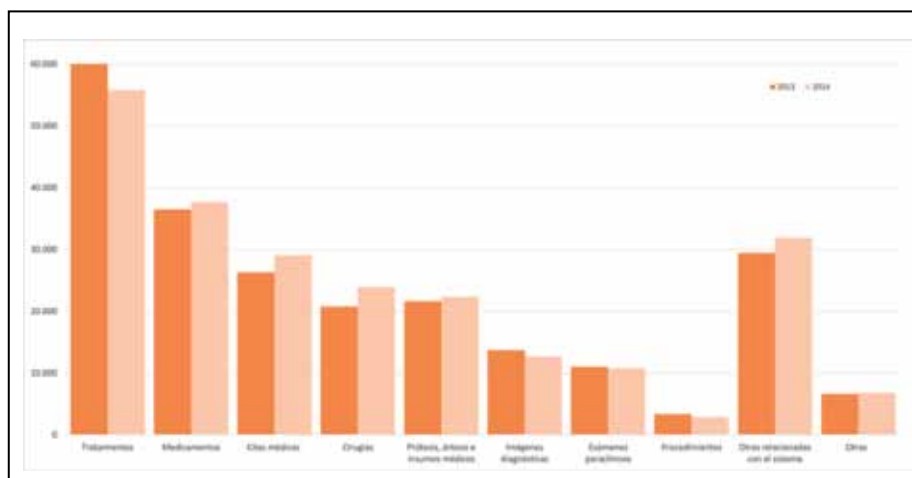

Las solicitudes en prótesis, órtesis e insumos se dieron con ocasión a la reiterada demanda de pañales, sillas de ruedas, pañitos, colchones, cama hospitalaria y cojines antiescaras. A pesar de que los kits de colostomía y glicemia ingresaron al POS para determinados pacientes, se siguen solicitando.

Al discriminar las solicitudes más frecuentes en 2014 según régimen, se encontró que en el contributivo, predominan las solicitudes por tratamientos, medicamentos, otras solicitudes relacionadas con el sistema (en especial, las solicitudes de transporte y viáticos), cirugías y prótesis, órtesis e insumos. En el régimen subsidiado adicional a lo anterior hay que destacar la alta participación de las tutelas por citas médicas especializadas (Tabla 31).

Tabla 31.  
Solicitudes más frecuentes en las tutelas de salud por régimen  
Periodo 2014

|                                     | RÉGIMEN      |         |         |             |         |         |             |         |         | Total       |        |
|-------------------------------------|--------------|---------|---------|-------------|---------|---------|-------------|---------|---------|-------------|--------|
|                                     | CONTRIBUTIVO |         |         | SUBSIDIADO  |         |         | OTROS       |         |         |             |        |
|                                     | Solicitudes  | Part V% | Part H% | Solicitudes | Part V% | Part H% | Solicitudes | Part V% | Part H% | Solicitudes | Part % |
| Tratamientos                        | 29.334       | 25,8    | 52,57   | 22.947      | 23,6    | 41,12   | 3.518       | 15,57   | 6,30    | 55.799      | 23,90  |
| Medicamentos                        | 18.768       | 16,5    | 49,89   | 16.301      | 16,7    | 43,33   | 2.552       | 11,29   | 6,78    | 37.621      | 16,11  |
| Citas médicas especializadas        | 11.288       | 9,9     | 38,87   | 14.371      | 14,8    | 49,49   | 3.379       | 14,95   | 11,64   | 29.038      | 12,44  |
| Cirugías                            | 12.629       | 11,1    | 56,61   | 7.664       | 7,9     | 34,36   | 2.015       | 8,92    | 9,03    | 22.308      | 9,55   |
| Prótesis, órtesis e insumos médicos | 11.804       | 10,4    | 49,38   | 11.439      | 11,8    | 47,86   | 660         | 2,92    | 2,76    | 23.903      | 10,24  |
| Imágenes diagnósticas               | 4.825        | 4,3     | 38,13   | 6.919       | 7,1     | 54,68   | 910         | 4,03    | 7,19    | 12.654      | 5,42   |
| Exámenes paraclínicos               | 4.902        | 4,3     | 45,74   | 4.778       | 4,9     | 44,59   | 1.036       | 4,58    | 9,67    | 10.716      | 4,59   |
| Procedimientos                      | 1.707        | 1,5     | 60,08   | 961         | 1,0     | 33,83   | 173         | 0,77    | 6,09    | 2.841       | 1,22   |
| Otras relacionadas con el sistema   | 17.797       | 15,7    | 55,91   | 11.538      | 11,9    | 36,25   | 2.495       | 11,04   | 7,84    | 31.830      | 13,63  |
| Otras                               | 470          | 0,4     | 6,95    | 431         | 0,4     | 6,37    | 5.862       | 25,94   | 86,68   | 6.763       | 2,90   |
| Total                               | 113.524      | 100,0   | 48,62   | 97.349      | 100,0   | 41,70   | 22.600      | 100,00  | 9,68    | 233.473     | 100,00 |

Fuente: Corte Constitucional  
Cálculos: Defensoría del Pueblo

### 3.3.2. Especialidades más frecuentes en las tutelas de salud

Teniendo en cuenta los ocho (8) servicios de salud en los cuales se clasificaron las solicitudes (tratamientos, medicamentos, cirugías, imágenes diagnósticas, exámenes paraclínicos, prótesis, órtesis e insumos, procedimientos y citas médicas especializadas) y de acuerdo al diagnóstico reportado en la tutela, se determinaron las especialidades relacionadas con cada uno de ellos. Así las cosas, se encontró que las cinco (5) especialidades más relacionadas con los diagnósticos son: neurología, oncología, ortopedia, oftalmología y endocrinología. Con relación a 2013, las especialidades que más vieron incrementada su frecuencia fueron infectología (Vih/sida), odontología, neumología, reumatología y urología; mientras que descendieron pediatría, gineco-obstetricia, neurocirugía, medicina interna y dermatología (Tabla 32).

Tabla 32.  
Especialidades más frecuentes en las tutelas  
Periodo 2013 - 2014

|                          | 2013       |         | 2014       |         | Variación % |
|--------------------------|------------|---------|------------|---------|-------------|
|                          | N° Tutelas | Part. % | N° Tutelas | Part. % |             |
| Neurología               | 14.812     | 16,65   | 16.851     | 18,76   | 13,77       |
| Oncología                | 9.361      | 10,52   | 9.570      | 10,66   | 2,23        |
| Ortopedia                | 6.916      | 7,78    | 7.377      | 8,21    | 6,67        |
| Oftalmología/retinología | 4.590      | 5,16    | 4.865      | 5,42    | 5,99        |
| Endocrinología           | 4.477      | 5,03    | 4.298      | 4,79    | -4,00       |
| Gastroenterología        | 4.258      | 4,79    | 4.022      | 4,48    | -5,54       |
| Psiquiatría              | 3.446      | 3,87    | 3.741      | 4,17    | 8,56        |
| Urología                 | 3.046      | 3,42    | 3.576      | 3,98    | 17,40       |
| Odontología              | 2.301      | 2,59    | 3.273      | 3,64    | 42,24       |
| Neumología               | 2.320      | 2,61    | 3.267      | 3,64    | 40,82       |
| Nefrología               | 2.687      | 3,02    | 3.036      | 3,38    | 12,99       |
| Cirugía general          | 2.407      | 2,71    | 2.824      | 3,14    | 17,32       |
| Cardiología              | 2.736      | 3,08    | 2.811      | 3,13    | 2,74        |
| Otorrinolaringología     | 3.033      | 3,41    | 2.757      | 3,07    | -9,10       |
| Neurocirugía             | 4.357      | 4,90    | 2.500      | 2,78    | -42,62      |
| Reumatología             | 1.946      | 2,19    | 2.412      | 2,69    | 23,95       |
| Medicina interna         | 3.577      | 4,02    | 2.199      | 2,45    | -38,52      |
| Gineco-obstetricia       | 3.037      | 3,41    | 1.689      | 1,88    | -44,39      |
| Dermatología             | 2.248      | 2,53    | 1.657      | 1,84    | -26,29      |
| Vascular                 | 1.580      | 1,78    | 1.472      | 1,64    | -6,84       |
| Cirugía plástica         | 1.569      | 1,76    | 1.242      | 1,38    | -20,84      |
| Infectología (Vih/sida)  | 467        | 0,53    | 901        | 1,00    | 92,93       |
| Hematología              | 520        | 0,58    | 487        | 0,54    | -6,35       |
| Proctología              | 356        | 0,40    | 227        | 0,25    | -36,24      |
| Pediatría                | 476        | 0,54    | 177        | 0,20    | -62,82      |
| Otras/No específicas     | 2.428      | 2,73    | 2.582      | 2,87    | 6,34        |
| Total                    | 88.951     | 100,00  | 89.813     | 100,00  | 0,97        |

Fuente: Corte Constitucional  
Cálculos: Defensoría del Pueblo

Al verificar las especialidades por régimen, se observaron mayores solicitudes en neurología, oncología, ortopedia, endocrinología y neumología en el régimen contributivo. En el régimen subsidiado se mantienen las mismas especialidades a excepción de neumología que fue reemplazada por oftalmología. (Tabla 33).

Tabla 33.  
Especialidades más frecuentes en las tutelas según Régimen  
Periodo 2014

|                          | RÉGIMEN      |         |         |            |         |         |         |         |         |         |        |
|--------------------------|--------------|---------|---------|------------|---------|---------|---------|---------|---------|---------|--------|
|                          | CONTRIBUTIVO |         |         | SUBSIDIADO |         |         | OTROS   |         |         |         |        |
|                          | Tutelas      | Part V% | Part H% | Tutelas    | Part V% | Part H% | Tutelas | Part V% | Part H% | Tutelas | Part % |
| Neurología               | 8.843        | 19,1    | 52,48   | 6.995      | 19,2    | 41,51   | 1013    | 14,16   | 6,01    | 16.851  | 18,76  |
| Oncología                | 5.663        | 12,2    | 59,17   | 3.440      | 9,4     | 35,95   | 467     | 6,53    | 4,88    | 9.570   | 10,66  |
| Ortopedia                | 3.380        | 7,3     | 45,82   | 3.009      | 8,3     | 40,79   | 988     | 13,81   | 13,39   | 7.377   | 8,21   |
| Oftalmología/retinología | 1.861        | 4,0     | 38,25   | 2.565      | 7,0     | 52,72   | 439     | 6,14    | 9,02    | 4.865   | 5,42   |
| Endocrinología           | 2.231        | 4,8     | 51,91   | 1.869      | 5,1     | 43,49   | 198     | 2,77    | 4,61    | 4.298   | 4,79   |
| Gastroenterología        | 1.987        | 4,3     | 49,40   | 1.796      | 4,9     | 44,65   | 239     | 3,34    | 5,94    | 4.022   | 4,48   |
| Psiquiatría              | 2.023        | 4,4     | 54,08   | 1.450      | 4,0     | 38,76   | 268     | 3,75    | 7,16    | 3.741   | 4,17   |
| Urología                 | 1.881        | 4,1     | 52,60   | 1.409      | 3,9     | 39,40   | 286     | 4,00    | 8,00    | 3.576   | 3,98   |
| Odontología              | 1.709        | 3,7     | 52,22   | 1.393      | 3,8     | 42,56   | 171     | 2,39    | 5,22    | 3.273   | 3,64   |
| Neumología               | 2.218        | 4,8     | 67,89   | 846        | 2,3     | 25,90   | 203     | 2,84    | 6,21    | 3.267   | 3,64   |
| Nefrología               | 1.451        | 3,1     | 47,79   | 1.461      | 4,0     | 48,12   | 124     | 1,73    | 4,08    | 3.036   | 3,38   |
| Cirugía general          | 1.414        | 3,1     | 50,07   | 1.115      | 3,1     | 39,48   | 295     | 4,12    | 10,45   | 2.824   | 3,14   |
| Cardiología              | 1.378        | 3,0     | 49,02   | 1.184      | 3,3     | 42,12   | 249     | 3,48    | 8,86    | 2.811   | 3,13   |
| Otorrinolaringología     | 1.256        | 2,7     | 45,56   | 1.163      | 3,2     | 42,18   | 338     | 4,72    | 12,26   | 2.757   | 3,07   |
| Neurocirugía             | 1.197        | 2,6     | 47,88   | 890        | 2,4     | 35,60   | 413     | 5,77    | 16,52   | 2.500   | 2,78   |
| Reumatología             | 1.442        | 3,1     | 59,78   | 849        | 2,3     | 35,20   | 121     | 1,69    | 5,02    | 2.412   | 2,69   |
| Medicina interna         | 1.138        | 2,5     | 51,75   | 759        | 2,1     | 34,52   | 302     | 4,22    | 13,73   | 2.199   | 2,45   |
| Gineco-obstetricia       | 688          | 1,5     | 40,73   | 821        | 2,3     | 48,61   | 180     | 2,52    | 10,66   | 1.689   | 1,88   |
| Dermatología             | 857          | 1,9     | 51,72   | 604        | 1,7     | 36,45   | 196     | 2,74    | 11,83   | 1.657   | 1,84   |
| Vascular                 | 942          | 2,0     | 63,99   | 412        | 1,1     | 27,99   | 118     | 1,65    | 8,02    | 1.472   | 1,64   |
| Cirugía plástica         | 748          | 1,6     | 60,23   | 454        | 1,2     | 36,55   | 40      | 0,56    | 3,22    | 1.242   | 1,38   |
| Infectología(VIH/sida)   | 336          | 0,7     | 37,29   | 524        | 1,4     | 58,16   | 41      | 0,57    | 4,55    | 901     | 1,00   |
| Hematología              | 166          | 0,4     | 34,09   | 243        | 0,7     | 49,90   | 78      | 1,09    | 16,02   | 487     | 0,54   |
| Proctología              | 143          | 0,3     | 63,00   | 84         | 0,2     | 37,00   | 0       | 0,00    | 0,00    | 227     | 0,25   |
| Pediatría                | 81           | 0,2     | 45,76   | 41         | 0,1     | 23,16   | 55      | 0,77    | 31,07   | 177     | 0,20   |
| Otras/No especificadas   | 1.199        | 2,6     | 46,44   | 1.050      | 2,9     | 40,67   | 333     | 4,65    | 12,90   | 2.582   | 2,87   |
| Total                    | 46.232       | 100,0   | 51,48   | 36.426     | 100,0   | 40,56   | 7.155   | 100,00  | 7,97    | 89.813  | 100,00 |

Fuente: Corte Constitucional  
Cálculos: Defensoría del Pueblo

### 3.3.3. Diagnósticos en las Tutelas

Con base en los ocho (8) servicios de salud y teniendo en cuenta la clasificación Estadística Internacional de Enfermedades (CIE 10), los diagnósticos se agrupan según los capítulos y bloques de dicha clasificación. Los cinco (5) diagnósticos más frecuentes que se relacionaban en las tutelas fueron los tumores o neoplasias (10,95%), enfermedades del sistema circulatorio (9,23%), enfermedades del aparato genitourinario (8,43%), enfermedades del sistema nervioso (8,31%) y trastornos mentales y de comportamiento (8,22%). Las enfermedades mentales y del comportamiento tuvieron una variación de 14,56% respecto del año anterior (Tabla 34).

Tabla 34.  
Diagnósticos en las tutelas  
Periodo 2013-2014

|                                                                                                                    | 2013       |         | 2014       |         | Variación % |
|--------------------------------------------------------------------------------------------------------------------|------------|---------|------------|---------|-------------|
|                                                                                                                    | N° Tutelas | Part. % | N° Tutelas | Part. % |             |
| Tumores (Neoplasias)                                                                                               | 9.779      | 10,99   | 9.835      | 10,95   | 0,57        |
| Enfermedades del sistema circulatorio                                                                              | 7.789      | 8,76    | 8.285      | 9,23    | 6,37        |
| Enfermedades del aparato genitourinario                                                                            | 8.407      | 9,45    | 7.571      | 8,43    | -9,94       |
| Enfermedades del sistema nervioso                                                                                  | 6.875      | 7,73    | 7.463      | 8,31    | 8,56        |
| Trastornos mentales y del comportamiento                                                                           | 6.446      | 7,25    | 7.384      | 8,22    | 14,56       |
| Enfermedades del sistema digestivo                                                                                 | 6.589      | 7,41    | 6.234      | 6,94    | -5,38       |
| Enfermedades del sistema osteomuscular y del tejido conectivo                                                      | 7.438      | 8,36    | 6.200      | 6,90    | -16,64      |
| Enfermedades endocrinas, nutricionales y metabólicas                                                               | 5.792      | 6,51    | 5.243      | 5,84    | -9,47       |
| Traumatismos, envenenamientos y algunas otras consecuencias de causa externa                                       | 4.725      | 5,31    | 4.633      | 5,16    | -1,95       |
| Síntomas, signos y hallazgos anormales clínicos y de laboratorio, no clasificados en otra parte                    | 4.331      | 4,87    | 4.338      | 4,83    | 0,17        |
| Enfermedades del ojo y sus anexos                                                                                  | 4.033      | 4,53    | 4.280      | 4,77    | 6,12        |
| Factores que influyen en el estado de salud y contacto con los servicios de salud                                  | 2.955      | 3,32    | 4.231      | 4,71    | 43,19       |
| Enfermedades del sistema respiratorio                                                                              | 2.931      | 3,30    | 3.155      | 3,51    | 7,65        |
| Malformaciones congénitas, deformidades y anomalías cromosómicas                                                   | 3.147      | 3,54    | 2.502      | 2,79    | -20,48      |
| Enfermedades de la piel y el tejido subcutáneo                                                                     | 1.821      | 2,05    | 2.082      | 2,32    | 14,33       |
| Enfermedades infecciosas y parasitarias                                                                            | 1.371      | 1,54    | 1.591      | 1,77    | 16,04       |
| Enfermedades del oído y de la apófisis mastoides                                                                   | 1.467      | 1,65    | 1.259      | 1,40    | -14,17      |
| Enfermedades de la sangre y de órganos hematopoyéticos y otros trastornos que afectan el mecanismo de la inmunidad | 0          | 0,00    | 579        | 0,64    |             |
| Enfermedades raras                                                                                                 | 486        | 0,55    | 484        | 0,54    | -0,38       |
| Causas extremas de morbilidad y de mortalidad                                                                      | 458        | 0,51    | 470        | 0,52    | 2,63        |
| Ciertas afecciones originadas en el periodo perinatal                                                              | 717        | 0,81    | 455        | 0,51    | -36,49      |
| Embarazo, parto y puerperio                                                                                        | 155        | 0,17    | 287        | 0,32    | 84,94       |
| Sin Clasificar                                                                                                     | 1.239      | 1,39    | 1.249      | 1,39    | 0,81        |
| Total                                                                                                              | 88.951     | 100,00  | 89.813     | 100,00  | 0,97        |

Fuente: Corte Constitucional  
Cálculos: Defensoría del Pueblo

### 3.3.3.1 Diagnósticos según régimen

En el régimen contributivo los diagnósticos más frecuentes fueron tumores y neoplasias (12%), seguido de trastornos mentales y de comportamientos (9,5%) enfermedades del sistema circulatorio (9,2%), enfermedades del sistema nervioso (9%) y enfermedades del aparato genitourinario (8,4).

En el régimen subsidiado, los diagnósticos más frecuentes fueron los tumores o neoplasias (10,4%), enfermedades del sistema circulatorio (9,6%), enfermedades del aparato genitourinario (8,9%), enfermedades del sistema nervioso (7,9%) y enfermedades del sistema digestivo (7,4%) (Tabla 35).

Tabla 35.  
Diagnósticos en las tutelas según Régimen  
Período 2014

|                                                                                                                    | RÉGIMEN      |         |         |            |         |         |         |         |         | Total   |        |
|--------------------------------------------------------------------------------------------------------------------|--------------|---------|---------|------------|---------|---------|---------|---------|---------|---------|--------|
|                                                                                                                    | CONTRIBUTIVO |         |         | SUBSIDIADO |         |         | OTROS   |         |         |         |        |
|                                                                                                                    | Tutelas      | Part V% | Part H% | Tutelas    | Part V% | Part H% | Tutelas | Part V% | Part H% | Tutelas | Part % |
| Tumores (Neoplasias)                                                                                               | 5.549        | 12,0    | 56,42   | 3.778      | 10,4    | 38,42   | 508     | 7,09    | 5,16    | 9.835   | 10,95  |
| Enfermedades del sistema circulatorio                                                                              | 4.249        | 9,2     | 51,29   | 3.486      | 9,6     | 42,07   | 550     | 7,69    | 6,64    | 8.285   | 9,23   |
| Enfermedades del aparato genitourinario                                                                            | 3.884        | 8,4     | 51,30   | 3.229      | 8,9     | 42,64   | 459     | 6,41    | 6,06    | 7.571   | 8,43   |
| Enfermedades del sistema nervioso                                                                                  | 4.142        | 9,0     | 55,49   | 2.891      | 7,9     | 38,73   | 431     | 6,02    | 5,78    | 7.463   | 8,31   |
| Trastornos mentales y del comportamiento                                                                           | 4.378        | 9,5     | 59,29   | 2.585      | 7,1     | 35,01   | 421     | 5,88    | 5,70    | 7.384   | 8,22   |
| Enfermedades del sistema digestivo                                                                                 | 3.335        | 7,2     | 53,49   | 2.685      | 7,4     | 43,06   | 215     | 3,01    | 3,45    | 6.234   | 6,94   |
| Enfermedades del sistema osteomuscular y del tejido conectivo                                                      | 3.058        | 6,6     | 49,32   | 2.130      | 5,8     | 34,35   | 1012    | 14,15   | 16,33   | 6.200   | 6,90   |
| Enfermedades endocrinas, nutricionales y metabólicas                                                               | 2.478        | 5,4     | 47,27   | 2.461      | 6,8     | 46,93   | 304     | 4,25    | 5,80    | 5.243   | 5,84   |
| Traumatismos, envenenamientos y algunas otras consecuencias de causa externa                                       | 2.028        | 4,4     | 43,78   | 1.740      | 4,8     | 37,56   | 865     | 12,08   | 18,66   | 4.633   | 5,16   |
| Síntomas, signos y hallazgos anormales clínicos y de laboratorio, no clasificados en otra parte                    | 2.617        | 5,7     | 60,32   | 1.370      | 3,8     | 31,58   | 351     | 4,91    | 8,10    | 4.338   | 4,83   |
| Enfermedades del ojo y sus anexos                                                                                  | 1.491        | 3,2     | 34,84   | 2.396      | 6,6     | 55,99   | 392     | 5,48    | 9,17    | 4.280   | 4,77   |
| Factores que influyen en el estado de salud y contacto con los servicios de salud                                  | 2.011        | 4,3     | 47,52   | 2.103      | 5,8     | 49,69   | 118     | 1,65    | 2,79    | 4.231   | 4,71   |
| Enfermedades del sistema respiratorio                                                                              | 1.656        | 3,6     | 52,47   | 1.212      | 3,3     | 38,41   | 288     | 4,02    | 9,12    | 3.155   | 3,51   |
| Malformaciones congénitas, deformidades y anomalías cromosómicas                                                   | 1.389        | 3,0     | 55,50   | 1.073      | 2,9     | 42,88   | 41      | 0,57    | 1,62    | 2.502   | 2,79   |
| Enfermedades de la piel y el tejido subcutáneo                                                                     | 1.150        | 2,5     | 55,22   | 666        | 1,8     | 31,97   | 267     | 3,73    | 12,81   | 2.082   | 2,32   |
| Enfermedades infecciosas y parasitarias                                                                            | 680          | 1,5     | 42,76   | 799        | 2,2     | 50,22   | 112     | 1,56    | 7,02    | 1.591   | 1,77   |
| Enfermedades del oído y de la apófisis mastoides                                                                   | 475          | 1,0     | 37,72   | 535        | 1,5     | 42,48   | 249     | 3,48    | 19,80   | 1.259   | 1,40   |
| Enfermedades de la sangre y de órganos hematopoyéticos y otros trastornos que afectan el mecanismo de la inmunidad | 249          | 0,5     | 42,98   | 202        | 0,6     | 34,86   | 128     | 1,79    | 22,16   | 579     | 0,64   |
| Enfermedades raras                                                                                                 | 364          | 0,8     | 75,23   | 120        | 0,3     | 24,77   | 0       | 0,00    | 0,00    | 484     | 0,54   |
| Causas extremas de morbilidad y de mortalidad                                                                      | 180          | 0,4     | 38,25   | 206        | 0,6     | 43,79   | 84      | 1,18    | 17,96   | 470     | 0,52   |
| Ciertas afecciones originadas en el periodo perinatal                                                              | 242          | 0,5     | 53,08   | 158        | 0,4     | 34,80   | 55      | 0,77    | 12,13   | 455     | 0,51   |
| Embarazo, parto y puerperio                                                                                        | 118          | 0,3     | 41,28   | 123        | 0,3     | 42,81   | 46      | 0,64    | 15,91   | 287     | 0,32   |
| Sin Clasificar                                                                                                     | 510          | 1,1     | 40,80   | 480        | 1,3     | 38,44   | 259     | 3,63    | 20,77   | 1.249   | 1,39   |
| Total                                                                                                              | 46.232       | 100,0   | 51,48   | 36.426     | 100,0   | 40,56   | 7.155   | 100,00  | 7,97    | 89.813  | 100,00 |

Fuente: Corte Constitucional  
Cálculos: Defensoría del Pueblo

Dentro del diagnóstico de los tumores o neoplasias, el maligno de mama es el más frecuente, seguido de próstata, encéfalo, cuello uterino y de la piel. (Tabla 36)

Estas cifras guardan relación con lo expresado en el Plan Decenal para el control del Cáncer en Colombia 2012- 2021, en el que se estableció que entre las principales causas de muerte por cáncer en mujeres están el cáncer en cuello uterino, de mama, de estómago y de pulmón; mientras que en los hombres, el de próstata ocupa el tercer lugar, precediéndole el de estómago y pulmón, patologías, todas, que pueden ser evitadas.

Tabla 36.  
Tutelas por diagnóstico de Tumores  
Periodo 2014

|                                             | RÉGIMEN      |         |         |            |         |         |         |         |         | Total   |        |
|---------------------------------------------|--------------|---------|---------|------------|---------|---------|---------|---------|---------|---------|--------|
|                                             | CONTRIBUTIVO |         |         | SUBSIDIADO |         |         | OTROS   |         |         |         |        |
|                                             | Tutelas      | Part V% | Part H% | Tutelas    | Part V% | Part H% | Tutelas | Part V% | Part H% | Tutelas | Part % |
| Tumor maligno de mama                       | 465          | 8,4     | 47,61   | 430        | 11,4    | 44,00   | 82      | 16,14   | 8,39    | 977     | 9,94   |
| Tumor maligno de próstata                   | 501          | 9,0     | 61,84   | 196        | 5,2     | 24,21   | 113     | 22,24   | 13,96   | 810     | 8,23   |
| Tumor maligno del encéfalo                  | 380          | 6,8     | 72,65   | 143        | 3,8     | 27,35   | 0       | 0,00    | 0,00    | 523     | 5,32   |
| Tumor maligno del cuello del útero          | 325          | 5,9     | 67,92   | 153        | 4,1     | 32,08   | 0       | 0,00    | 0,00    | 478     | 4,86   |
| Otros tumores malignos de la piel           | 124          | 2,2     | 27,29   | 290        | 7,7     | 63,71   | 41      | 8,07    | 9,00    | 456     | 4,63   |
| Tumor maligno del ano y del conducto anal   | 173          | 3,1     | 42,59   | 192        | 5,1     | 47,31   | 41      | 8,07    | 10,10   | 406     | 4,13   |
| Tumor maligno de la glándula tiroides       | 244          | 4,4     | 65,74   | 86         | 2,3     | 23,21   | 41      | 8,07    | 11,05   | 371     | 3,77   |
| Tumor maligno de los bronquios y del pulmón | 200          | 3,6     | 55,49   | 161        | 4,2     | 44,51   | 0       | 0,00    | 0,00    | 361     | 3,67   |
| Linfoma no hodgking de otro tipo            | 281          | 5,1     | 91,53   | 0          | 0,0     | 0,00    | 26      | 5,12    | 8,47    | 307     | 3,12   |
| Tumor maligno del estómago                  | 170          | 3,1     | 52,37   | 155        | 4,1     | 47,63   | 0       | 0,00    | 0,00    | 325     | 3,31   |
| Otros                                       | 2.686        | 48,4    | 55,71   | 1.971      | 52,2    | 40,88   | 164     | 32,28   | 3,40    | 4.821   | 49,02  |
| Total                                       | 5.549        | 100,0   | 56,43   | 3.777      | 100,0   | 38,41   | 508     | 100,00  | 5,17    | 9.835   | 100,00 |

Fuente: Corte Constitucional  
Cálculos: Defensoría del Pueblo

En cuanto a las enfermedades del sistema circulatorio, las más frecuentes son accidentes cerebro vasculares con el 27,32%, seguido de la hipertensión arterial con un 14,34% (Tabla 37).

La enfermedad cerebrovascular constituye un problema de salud pública mundial. En Colombia es la tercera causa de muerte en la población adulta y genera una alta discapacidad en estos pacientes<sup>41</sup>.

41 <http://www.asivamosensalud.org/inidicadores/estado-de-salud/grafica.ver/68>

En lo que respecta a la hipertensión arterial, según información reportada por la Organización Mundial de la Salud (OMS), es el principal factor de riesgo de muerte en el mundo. En Colombia, para 2014 se estimó que el 23% de adultos la padecen. Sin embargo, a pesar que en general no hay cura para esta enfermedad, existen factores de riesgo que se pueden controlar con el fin de disminuir la incidencia de la misma.

Tabla 37.  
Tutelas por diagnóstico de Enfermedades del sistema circulatorio  
Período 2014

|                                                                                  | RÉGIMEN      |         |         |            |         |         |         |         |         | Total   |        |
|----------------------------------------------------------------------------------|--------------|---------|---------|------------|---------|---------|---------|---------|---------|---------|--------|
|                                                                                  | CONTRIBUTIVO |         |         | SUBSIDIADO |         |         | OTROS   |         |         |         |        |
|                                                                                  | Tutelas      | Part V% | Part H% | Tutelas    | Part V% | Part H% | Tutelas | Part V% | Part H% | Tutelas | Part % |
| Accidente vascular encefálico agudo no especificado como hemorrágico o isquémico | 997          | 23,5    | 44,06   | 1.181      | 33,9    | 52,18   | 85      | 15,45   | 3,76    | 2.263   | 27,32  |
| Hipertensión esencial (primaria)                                                 | 544          | 12,8    | 45,81   | 510        | 14,6    | 42,91   | 134     | 24,36   | 11,28   | 1.188   | 14,34  |
| Complicaciones y descripciones mal definidas en enfermedades cardíacas           | 516          | 12,1    | 75,19   | 122        | 3,5     | 17,82   | 48      | 8,73    | 7,00    | 686     | 8,28   |
| Otros trastornos de las venas                                                    | 419          | 9,9     | 66,34   | 213        | 6,1     | 33,66   | 0       | 0,00    | 0,00    | 631     | 7,62   |
| Secuelas de enfermedades cerebrovascular                                         | 120          | 2,8     | 43,76   | 154        | 4,4     | 56,24   | 0       | 0,00    | 0,00    | 274     | 3,31   |
| Infarto cerebral                                                                 | 94           | 2,2     | 38,17   | 120        | 3,4     | 48,81   | 32      | 5,82    | 13,02   | 246     | 2,97   |
| Aneurisma y disección aórticos                                                   | 163          | 3,8     | 69,13   | 0          | 0,0     | 0,00    | 73      | 13,27   | 30,87   | 236     | 2,85   |
| Cardiomiopatía                                                                   | 81           | 1,9     | 37,44   | 95         | 2,7     | 43,98   | 40      | 7,27    | 18,59   | 215     | 2,60   |
| Taquicardia paroxística                                                          | 42           | 1,0     | 19,99   | 167        | 4,8     | 80,01   | 0       | 0,00    | 0,00    | 208     | 2,51   |
| Venas varicosas de los miembros inferiores                                       | 78           | 1,8     | 38,51   | 124        | 3,6     | 61,49   | 0       | 0,00    | 0,00    | 201     | 2,43   |
| Otros                                                                            | 1.196        | 28,1    | 56,02   | 801        | 23,0    | 37,52   | 138     | 25,09   | 6,46    | 2.135   | 25,77  |
| Total                                                                            | 4.249        | 100,0   | 51,29   | 3.486      | 100,0   | 42,07   | 550     | 100,00  | 6,64    | 8.285   | 100,00 |

Fuente: Corte Constitucional  
Cálculos: Defensoría del Pueblo

Con relación a las enfermedades del sistema genitourinario, las más frecuentes en las tutelas fueron la insuficiencia renal (15,11%) seguido de la hiperplasia de la próstata (13,09%) y los cálculos del riñón y del uréter (7,47%). (Tabla 38).

Según el estudio “Situación de la enfermedad renal crónica, en Colombia 2013” realizado por la Cuenta de alto Costo –CAC–, se identificó que en nuestro país la prevalencia de la insuficiencia renal crónica en personas con terapia de reemplazo renal, en el 2013, fue de 658 pacientes por millón de habitantes.

Tabla 38.  
Tutelas por diagnóstico de Enfermedades del Sistema Genitourinario  
Periodo 2014

|                                            | RÉGIMEN      |         |         |            |         |         |         |         |         | Total   |        |
|--------------------------------------------|--------------|---------|---------|------------|---------|---------|---------|---------|---------|---------|--------|
|                                            | CONTRIBUTIVO |         |         | SUBSIDIADO |         |         | OTROS   |         |         |         |        |
|                                            | Tutelas      | Part V% | Part H% | Tutelas    | Part V% | Part H% | Tutelas | Part V% | Part H% | Tutelas | Part % |
| Insuficiencia renal                        | 531          | 13,7    | 46,42   | 547        | 16,9    | 47,81   | 66      | 14,38   | 5,77    | 1.144   | 15,11  |
| Hiperplasia de la próstata                 | 324          | 8,3     | 32,69   | 541        | 16,8    | 54,59   | 126     | 27,45   | 12,71   | 991     | 13,09  |
| Calculos del riñón y del ureter            | 251          | 6,5     | 44,35   | 300        | 9,3     | 53,00   | 15      | 3,27    | 2,65    | 566     | 7,47   |
| Hipertrofia de la mama                     | 269          | 6,9     | 69,51   | 118        | 3,7     | 30,49   | 0       | 0,00    | 0,00    | 387     | 5,11   |
| Otros trastornos del sistema urinario      | 2.509        | 64,6    | 55,95   | 1.723      | 53,4    | 38,43   | 252     | 54,90   | 5,62    | 4.484   | 59,22  |
| Total                                      | 3.884        | 100,0   | 51,29   | 3.229      | 100,0   | 42,64   | 459     | 100,00  | 6,06    | 7.572   | 100,00 |
| Aneurisma y disección aórticos             | 163          | 3,8     | 69,13   | 0          | 0,0     | 0,00    | 73      | 13,27   | 30,87   | 236     | 2,85   |
| Cardiomiopatía                             | 81           | 1,9     | 37,44   | 95         | 2,7     | 43,98   | 40      | 7,27    | 18,59   | 215     | 2,60   |
| Taquicardia paroxística                    | 42           | 1,0     | 19,99   | 167        | 4,8     | 80,01   | 0       | 0,00    | 0,00    | 208     | 2,51   |
| Venas varicosas de los miembros inferiores | 78           | 1,8     | 38,51   | 124        | 3,6     | 61,49   | 0       | 0,00    | 0,00    | 201     | 2,43   |
| Otros                                      | 1.196        | 28,1    | 56,02   | 801        | 23,0    | 37,52   | 138     | 25,09   | 6,46    | 2.135   | 25,77  |
| Total                                      | 4.249        | 100,0   | 51,29   | 3.486      | 100,0   | 42,07   | 550     | 100,00  | 6,64    | 8.285   | 100,00 |

Fuente: Corte Constitucional  
Cálculos: Defensoría del Pueblo

### 3.3.4. Otras solicitudes relacionadas con el sistema.

En este grupo se incluyeron las solicitudes realizadas por los usuarios que de una u otra forma le impidieron acceder a los servicios de salud o que fueron derivadas de un servicio de salud. Durante 2014, estas solicitudes tuvieron un incremento del 8,13% (Tabla 39). Las solicitudes por transporte, alojamiento y viáticos fueron las de mayor participación con 45,5%, con un incremento del 31,51% con respecto al año anterior, seguidas de atención médica (14,1%), pago de incapacidades (12,58%) y pago de licencias de maternidad (6,93%) (Tabla 39).

Tabla 39.  
Otras solicitudes relacionadas con el sistema  
Periodo 2013 – 2014

|                                             | PERIODO     |         |             |         | Variación % |
|---------------------------------------------|-------------|---------|-------------|---------|-------------|
|                                             | 2013        |         | 2014        |         |             |
|                                             | Solicitudes | Part. % | Solicitudes | Part. % |             |
| Transporte, alojamiento y viáticos          | 10.989      | 37,33   | 14.452      | 45,40   | 31,51       |
| Atención médica                             | 5.815       | 19,75   | 4.489       | 14,10   | -22,80      |
| Pago de incapacidades                       | 3.334       | 11,33   | 4.004       | 12,58   | 20,10       |
| Pago de licencia de maternidad              | 1.934       | 6,57    | 2.206       | 6,93    | 14,06       |
| Exoneración de copagos o cuotas moderadoras | 1.687       | 5,73    | 1.978       | 6,21    | 17,25       |
| Afiliaciones/retiros                        | 2.289       | 7,78    | 1.914       | 6,01    | -16,38      |
| Cambio de EPS/IPS                           | 873         | 2,97    | 1.345       | 4,23    | 54,07       |
| Servicio de ambulancia                      | 445         | 1,51    | 636         | 2,00    | 42,92       |
| Pago de aportes a salud                     | 546         | 1,85    | 338         | 1,06    | -38,10      |
| Reintegro por pagos médicos                 | 456         | 1,55    | 220         | 0,69    | -51,75      |
| Atención en centro especializado            | 546         | 1,85    | 128         | 0,40    | -76,56      |
| Multiafiliación/corrección BDUa             | 266         | 0,90    | 78          | 0,25    | -70,68      |
| Otros                                       | 258         | 0,88    | 42          | 0,13    | -83,72      |
| Total                                       | 29.438      | 100,00  | 31.830      | 100,00  | 8,13        |

Fuente: Corte Constitucional  
Cálculos: Defensoría del Pueblo

El incremento en las tutelas por negación en la autorización de transporte, alojamiento y viáticos se debe principalmente a la confusión que generó la Resolución 5521 de 2013, ya que estos servicios no quedaron explícitamente incluidos en el POS, lo cual fue ratificado por el MSPS en respuesta dada a la Defensoría del Pueblo: “el traslado, hospedaje y viáticos para los acompañantes no corresponde a la prestación de servicios de salud conforme al POS en ninguna de las fases de atención señaladas en el artículo 162 de la ley 100/93; estas prestaciones corresponden a servicios de apoyo social y su financiamiento requiere el uso de otras fuentes de financiación distintas a la UPC”, en la misma respuesta el MSPS informa dos excepciones: comunidades indígenas y los servicios de apoyo social para pacientes con cáncer menores de 18 años.

La Defensoría del Pueblo considera que esta posición del MSPS es un claro retroceso a la jurisprudencia emitida por la Honorable Corte Constitucional y contradice los Acuerdos 008 de 2009 y 029 de 2011; y la herramienta de consulta denominada POS Pópuli establecida por el Ministerio de Salud y Protección Social en su página WEB.

La segunda solicitud más frecuente dentro de este grupo es la petición de atención médica, aunque presentó una disminución del 22,8% en gran parte por las depuraciones que se vienen haciendo a la BDUA.

Otras solicitudes que en los últimos años han presentado aumentos significativos son las reclamaciones por pago de incapacidades y el reconocimiento del pago de licencias de maternidad. En estos casos la Corte Constitucional ha sido reiterativa en la protección de las personas que presentan limitaciones en su salud por causa de enfermedades y en la necesidad de proteger a la mujer gestante.

Por otro lado, hay que resaltar la disminución de tutelas por inconvenientes en la base de datos única de afiliados –BDUA– contrario a lo ocurrido por las solicitudes de cambio de EPS/IPS, que se incrementaron en 54,07% (Tabla 40), en la mayoría de los casos, por los cambios de contratación de IPS sin consultar a los usuarios, lo que genera interrupción en sus tratamientos.

Tabla 40.  
Otras solicitudes relacionadas con el sistema según Régimen  
Periodo 2014

|                                             | RÉGIMEN      |         |         |             |         |         |             |         |         | Total       |        |
|---------------------------------------------|--------------|---------|---------|-------------|---------|---------|-------------|---------|---------|-------------|--------|
|                                             | CONTRIBUTIVO |         |         | SUBSIDIADO  |         |         | OTROS       |         |         |             |        |
|                                             | Solicitudes  | Part V% | Part H% | Solicitudes | Part V% | Part H% | Solicitudes | Part V% | Part H% | Solicitudes | Part % |
| Transporte, alojamiento y viáticos          | 6.764        | 38,0    | 46,81   | 7.012       | 60,8    | 48,52   | 675         | 27,05   | 4,67    | 14.451      | 45,40  |
| Atención médica                             | 1.589        | 8,9     | 35,40   | 1.817       | 15,7    | 40,48   | 1083        | 43,41   | 24,13   | 4.489       | 14,10  |
| Pago de incapacidades                       | 3.777        | 21,2    | 94,33   | 0           | 0,0     | 0,00    | 227         | 9,10    | 5,67    | 4.004       | 12,58  |
| Pago de licencia de maternidad              | 2.161        | 12,1    | 97,92   | 0           | 0,0     | 0,00    | 46          | 1,84    | 2,08    | 2.207       | 6,93   |
| Exoneración de copagos o cuotas moderadoras | 854          | 4,8     | 43,17   | 1.124       | 9,7     | 56,83   | 0           | 0,00    | 0,00    | 1.978       | 6,21   |
| Afiliaciones/retiros                        | 1.011        | 5,7     | 52,82   | 606         | 5,3     | 31,66   | 297         | 11,90   | 15,52   | 1.914       | 6,01   |
| Cambio de EPS/IPS                           | 724          | 4,1     | 53,83   | 534         | 4,6     | 39,70   | 87          | 3,49    | 6,47    | 1.345       | 4,23   |
| Servicio de ambulancia                      | 399          | 2,2     | 62,74   | 237         | 2,1     | 37,26   | 0           | 0,00    | 0,00    | 636         | 2,00   |
| Pago de aportes a salud                     | 257          | 1,4     | 76,04   | 41          | 0,4     | 12,13   | 40          | 1,60    | 11,83   | 338         | 1,06   |
| Reintegro por pagos médicos                 | 139          | 0,8     | 63,18   | 41          | 0,4     | 18,64   | 40          | 1,60    | 18,18   | 220         | 0,69   |
| Atención en centro especializado            | 80           | 0,4     | 62,50   | 48          | 0,4     | 37,50   | 0           | 0,00    | 0,00    | 128         | 0,40   |
| Multiafiliación/ corrección BDUA            | 42           | 0,2     | 53,85   | 36          | 0,3     | 46,15   | 0           | 0,00    | 0,00    | 78          | 0,25   |
| Otros                                       | 0            | 0,0     | 0,00    | 42          | 0,4     | 100,00  | 0           | 0,00    | 0,00    | 42          | 0,13   |
| Total                                       | 17.797       | 100,0   | 55,91   | 11.538      | 100,0   | 36,25   | 2.495       | 100,00  | 7,84    | 31.830      | 100,00 |

Fuente: Corte Constitucional  
Cálculos: Defensoría del Pueblo

### 3.3.5. Otras solicitudes diferentes en las tutelas de salud.

Aunque en estas acciones, la invocación del derecho a la salud no implica la demanda de un servicio de salud, los usuarios consideran que la afectación de otros derechos, conduce a la vulneración del derecho a la salud. Su frecuencia aumentó en 16,44%, especialmente en solicitudes para la calificación de invalidez y en solicitudes de ayuda humanitaria, principalmente por aquellos ciudadanos en condición de desplazamiento y desempleo (Tabla 41).

Tabla 41.  
Otras solicitudes  
Periodo 2013 – 2014

|                                     | PERIODO     |         |             |         | Variación % |
|-------------------------------------|-------------|---------|-------------|---------|-------------|
|                                     | 2013        |         | 2014        |         |             |
|                                     | Solicitudes | Part. % | Solicitudes | Part. % |             |
| Calificación de invalidez           | 515         | 8,87    | 883         | 13,06   | 71,46       |
| Ayuda humanitaria                   | 785         | 13,52   | 814         | 12,04   | 3,69        |
| Reintegro laboral                   | 581         | 10,00   | 790         | 11,68   | 35,97       |
| Medio ambiente y salubridad pública | 137         | 2,36    | 584         | 8,64    | 326,28      |
| Reconocimiento de pensión           | 583         | 10,04   | 496         | 7,33    | -14,92      |
| Pago de prestaciones económicas     | 627         | 10,80   | 404         | 5,97    | -35,57      |
| Servicios públicos                  | 736         | 12,67   | 360         | 5,32    | -51,09      |
| Traslado laboral                    | 513         | 8,83    | 293         | 4,33    | -42,88      |
| Otros                               | 1.331       | 22,92   | 2.139       | 31,63   | 60,71       |
| Total                               | 5.808       | 100,00  | 6.763       | 100,00  | 16,44       |

Fuente: Corte Constitucional  
Cálculos: Defensoría del Pueblo

La mayoría de estas solicitudes son presentadas por ciudadanos que pertenecen a otros regímenes de salud o que se encuentran en condición de desplazamiento (86,68%). (Tabla 42).

La principal solicitud es la calificación de invalidez con 13,06%. Es de recordar que las juntas de calificación de invalidez por virtud de la ley están obligadas a realizar una evaluación técnica y científica, con la finalidad de que a través del dictamen se establezca el porcentaje de la pérdida de la capacidad laboral, el origen de la invalidez y la fecha de estructuración de dicha pérdida. Este diagnóstico es la base para que las AFP reconozcan o no una pensión de invalidez.

Tabla 42.  
Otras solicitudes según régimen  
Periodo 2014

|                                     | RÉGIMEN      |         |         |             |         |         |             |         |         |             |        |
|-------------------------------------|--------------|---------|---------|-------------|---------|---------|-------------|---------|---------|-------------|--------|
|                                     | CONTRIBUTIVO |         |         | SUBSIDIADO  |         |         | OTROS       |         |         |             |        |
|                                     | Solicitudes  | Part V% | Part H% | Solicitudes | Part V% | Part H% | Solicitudes | Part V% | Part H% | Solicitudes | Part % |
| Calificación de invalidez           | 283          | 60,2    | 32,05   | 0           | 0,0     | 0,00    | 600         | 10,24   | 67,95   | 883         | 13,06  |
| Ayuda humanitaria                   | 0            | 0,0     | 0,00    | 0           | 0,0     | 0,00    | 814         | 13,89   | 100,00  | 814         | 12,04  |
| Reintegro laboral                   | 0            | 0,0     | 0,00    | 0           | 0,0     | 0,00    | 790         | 13,48   | 100,00  | 790         | 11,68  |
| Medio ambiente y salubridad pública | 0            | 0,0     | 0,00    | 11          | 2,6     | 1,88    | 574         | 9,79    | 98,12   | 585         | 8,65   |
| Reconocimiento de pensión           | 32           | 6,8     | 6,46    | 0           | 0,0     | 0,00    | 463         | 7,90    | 93,54   | 495         | 7,32   |
| Pago de prestaciones económicas     | 0            | 0,0     | 0,00    | 0           | 0,0     | 0,00    | 404         | 6,89    | 100,00  | 404         | 5,97   |
| Servicios públicos                  | 0            | 0,0     | 0,00    | 0           | 0,0     | 0,00    | 360         | 6,14    | 100,00  | 360         | 5,32   |
| Traslado laboral                    | 0            | 0,0     | 0,00    | 0           | 0,0     | 0,00    | 293         | 5,00    | 100,00  | 293         | 4,33   |
| Otros                               | 155          | 33,0    | 7,25    | 420         | 97,4    | 19,64   | 1564        | 26,68   | 73,12   | 2.139       | 31,63  |
| Total                               | 470          | 100,0   | 6,95    | 431         | 100,0   | 6,37    | 5.862       | 100,00  | 86,68   | 6.763       | 100,00 |

Fuente: Corte Constitucional  
Cálculos: Defensoría del Pueblo

### 3.4. Tutelas para exigir contenidos del POS y No POS en los servicios de salud.

Con relación a este acápite hay que mencionar que el Ministro de Salud y Protección Social ha manifestado en diferentes escenarios que la clasificación POS y No POS se mantendrá hasta el año 2016, cuando se cumplen los dos años establecidos por la Ley estatutaria. No obstante, la mayoría de los actores del sistema que representan a los usuarios manifiestan que lo expresado por el ministro contradice lo establecido en la Ley estatutaria, pues desde el momento de promulgación de la norma, todo quedó incluido en el POS y lo que falta es el listado explícito de lo que no estaría en el Plan de beneficios. Esta apreciación de los representantes de los usuarios puede generar una avalancha de tutelas lo que implica un posible aumento de las mismas durante 2015 y 2016.

En los resultados de este capítulo solo se tuvieron en cuenta las tutelas en las que los pacientes solicitaron servicios de salud (tratamientos, medicamentos, citas médicas; prótesis, órtesis e insumos, imágenes diagnósticas, exámenes paraclínicos y procedimientos) y únicamente para los usuarios que pertenecen al régimen contributivo o al régimen subsidiado.

Al igual que en años anteriores en esta clasificación (Pos y No POS), no se tuvieron en cuenta las solicitudes de transporte, alojamiento y viáticos, que como es sabido fueron incluidas en el POS desde el Acuerdo 08 de 2009 y ratificadas en el Acuerdo 29 de 2011. Adicionalmente, en la herramienta de consulta denominada POS Pópuli<sup>42</sup> establecida por el Ministerio de Salud y Protección Social para que los ciudadanos consulten los contenidos del Plan de Beneficios a que tienen derecho se encuentra lo siguiente<sup>43</sup>:

#### *“TRANSPORTE DEL PACIENTE AMBULATORIO*

*El servicio de transporte en un medio diferente a la ambulancia, para acceder a una atención incluida en el Plan Obligatorio de Salud, no disponible en el municipio de residencia del afiliado, será cubierto con cargo a la prima adicional para zona especial por dispersión geográfica. PARÁGRAFO. Las EPS igualmente deberán pagar el transporte del paciente ambulatorio cuando el usuario debe trasladarse a un municipio distinto a su residencia para recibir los servicios mencionados en el artículo 10 de esta resolución, cuando existiendo estos en su municipio de residencia la EPS no los hubiere tenido en cuenta para la conformación de su red de servicios. Esto aplica independientemente de si en el municipio la EPS recibe o no una UPC diferencial.*

#### *TRANSPORTE O TRASLADOS DE PACIENTES*

*El Plan Obligatorio de Salud cubre el traslado acuático, aéreo y terrestre (en ambulancia básica o medicalizada) en los siguientes casos: • Movilización de pacientes con patología de urgencias desde el sitio de ocurrencia de la misma hasta una institución hospitalaria, incluyendo el servicio prehospitalario y de apoyo terapéutico en unidades móviles. • Entre instituciones prestadoras de servicios de salud dentro del territorio nacional de los pacientes remitidos, teniendo en cuenta las limitaciones en la oferta de servicios de la institución en donde están siendo atendidos, que requieran de atención en un servicio no disponible en la institución remitora. Igualmente para estos casos está cubierto el traslado en ambulancia en caso de contrarreferencia. El servicio de traslado cubrirá el medio de transporte disponible en el medio geográfico donde se encuentre el paciente, con base en su estado de salud, el concepto del médico tratante y el destino de la remisión, de conformidad con la normatividad vigente. Así mismo, se cubre el traslado en ambulancia del paciente remitido para atención domiciliaria si el médico así lo prescribe”.*

<sup>42</sup> [www.pospopuli.minsalud.gov.co](http://www.pospopuli.minsalud.gov.co)

<sup>43</sup> Consulta realizada el 21 de mayo de 2015

No obstante lo anterior, la inclusión en el POS no fue explícita en la Resolución 5521 de 2013, expedida por el Ministerio de Salud y Protección Social, lo que ha generado nuevas negaciones de estos servicios por parte de las EPS con la consabida interposición de tutelas.

Las distintas solicitudes dentro de cada una de las tutelas fueron clasificadas en POS y No POS, dependiendo si se encontraban o no en el Plan Obligatorio de Salud unificado con el Acuerdo 032 de 2012, el cual fue actualizado y aclarado por la Resolución 5521 de 2013. Se analizaron cada una de las solicitudes y se clasificaron, de acuerdo con la normatividad vigente hasta el año 2014, básicamente en la Resolución 5521 de 2013, expedida por el Ministerio de Salud y Protección Social, por la cual se define, aclara y actualiza integralmente el Plan Obligatorio de Salud (POS), complementada con la herramienta de consulta POS Pópuli, dispuesta por dicho ministerio en la página web de la entidad.

Según la normatividad vigente, se entendería que ningún colombiano tendría que interponer tutelas por tecnologías en salud que se encuentran en el POS. Sin embargo, la realidad es otra y de acuerdo con el seguimiento que la Defensoría del Pueblo viene realizando en sus distintos informes de tutela desde el año 1999, la mayoría de EPS continúan interponiendo barreras de acceso a los usuarios para reclamar estos servicios.

A pesar de que el POS se ha actualizado en los últimos años incluyendo más tecnologías en salud como consecuencia de la orden emitida por la Honorable Corte Constitucional en su sentencia T-760 de 2008 y de la unificación del POS, dichas solicitudes continúan elevadas.

De acuerdo con la tabla N° 43 y la gráfica 6, desde la expedición de la sentencia T-760 de 2008, la interposición de tutelas por solicitudes POS se ha mantenido en niveles elevados (70%), sin embargo en 2014 empieza a observarse un ligero descenso en los dos regímenes, aunque continúa siendo mayor en el régimen subsidiado (Gráficas 7 y 8).

Al observar los resultados del último año, las solicitudes por servicios POS son de 65,74%, siendo mayor en el régimen subsidiado en 9 puntos porcentuales respecto al régimen contributivo.

Tabla 43.  
Porcentaje de solicitudes POS en cada régimen  
Periodo 2003-2014

| AÑO  | Contributivo | Subsidiado | General |
|------|--------------|------------|---------|
| 2003 | 55,46%       | 62,35%     | 56,00%  |
| 2004 | 59,73%       | 67,43%     | 60,40%  |
| 2005 | 52,22%       | 60,82%     | 53,10%  |
| 2006 | 67,37%       | 39,26%     | 60,90%  |
| 2007 | 54,30%       | 33,26%     | 50,70%  |
| 2008 | 54,85%       | 32,71%     | 49,30%  |
| 2009 | 59,90%       | 76,50%     | 68,20%  |
| 2010 | 54,00%       | 73,80%     | 65,40%  |
| 2011 | 64,16%       | 70,26%     | 67,81%  |
| 2012 | 65,25%       | 75,59%     | 70,93%  |
| 2013 | 64,90%       | 75,63%     | 69,96%  |
| 2014 | 61,70%       | 70,24%     | 65,74%  |

Fuente: Corte Constitucional  
Cálculos: Defensoría del Pueblo

Gráfica 6.  
Evolución de las solicitudes POS en las tutelas  
Periodo 2003-2014

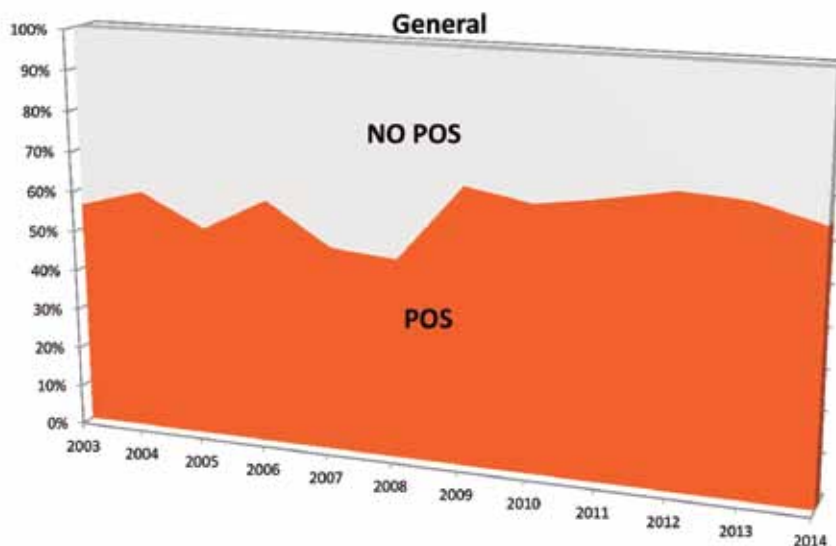

Gráfica 7.  
Evolución de las solicitudes POS en las tutelas del régimen contributivo  
Periodo 2003-2014

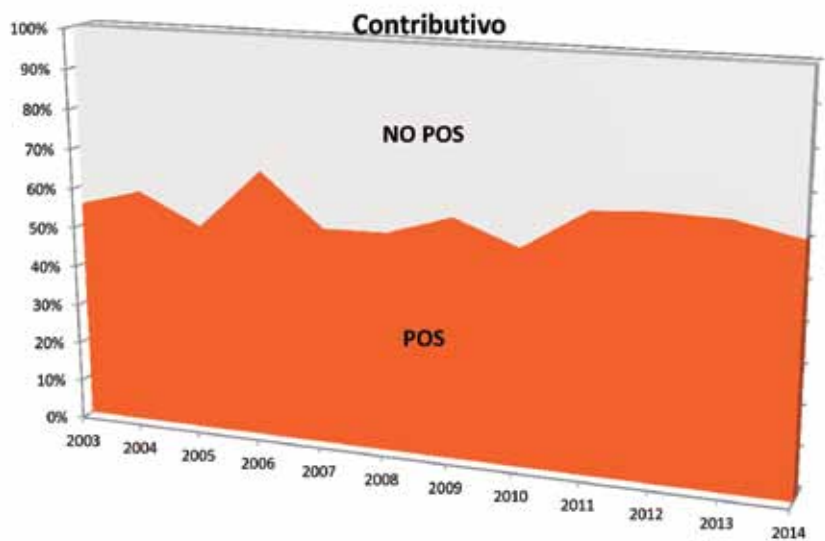

Gráfica 8.  
Evolución de las solicitudes POS en las tutelas del régimen subsidiado  
Periodo 2003-2014

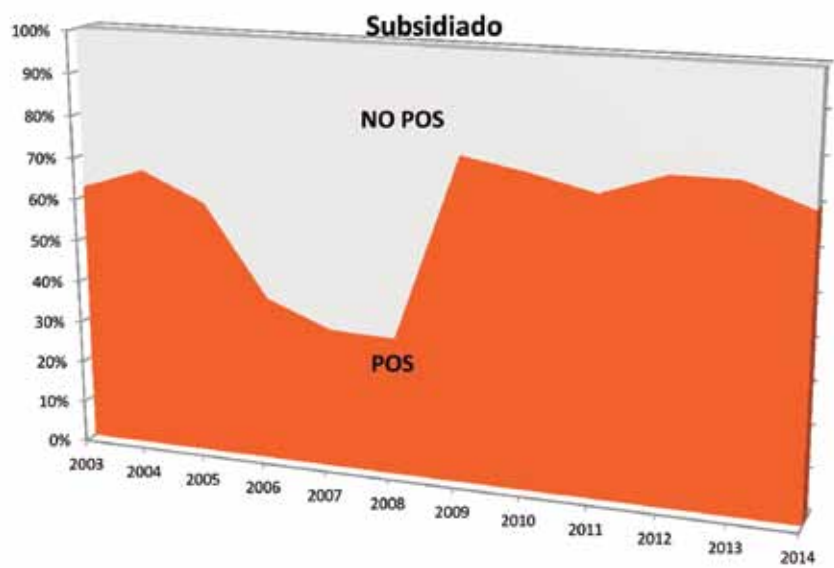

En 2014, el número de solicitudes de tutelas para reclamar servicios que se encuentran en el plan obligatorio de salud disminuyó en 6,5% respecto de 2013, y su distribución es de 49,5% en el régimen contributivo y 50,5% en el subsidiado (Tabla 44) (Gráfica 9).

Tabla 44.  
Solicitudes en tutelas de salud  
Regímenes contributivo y subsidiado  
Periodo 2013-2014

|        | 2013        |         | 2014        |         | Variación<br>% |
|--------|-------------|---------|-------------|---------|----------------|
|        | Solicitudes | Part. % | Solicitudes | Part. % |                |
| Pos    | 127.001     | 69,96   | 118.745     | 65,74   | -6,50          |
| No Pos | 54.528      | 30,04   | 61.892      | 34,26   | 13,50          |
| Total  | 181.529     | 100,00  | 180.637     | 100,00  | -0,49          |

Fuente: Corte Constitucional  
Cálculos: Defensoría del Pueblo

Gráfica 9.  
Contenido POS en las Tutelas  
Periodo 2013-2014

Año 2013

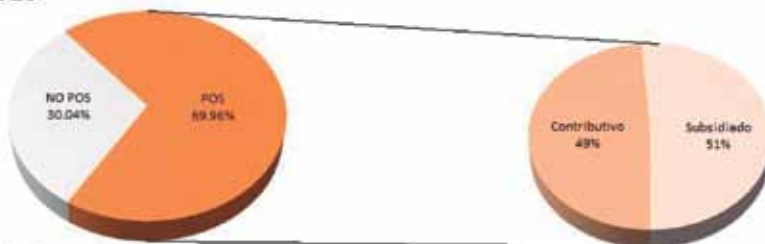

Año 2014

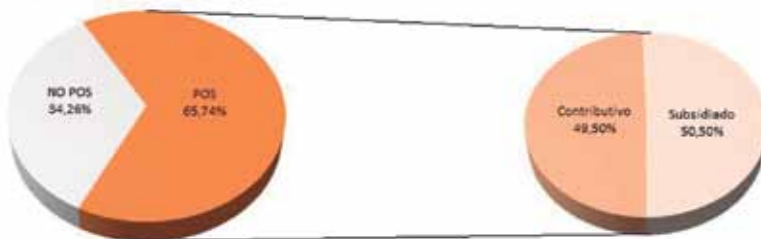

### 3.4.1. Contenidos más frecuentes en los regímenes contributivo y subsidiado.

En general, las solicitudes para reclamar servicios de salud se mantuvieron en las cifras del año anterior. Los tratamientos siguen como los contenidos más frecuentes en las tutelas, a pesar de presentar una disminución de 8,27%, con una participación del 28,94%, inferior a la observada en 2013. Los requerimientos por prótesis, órtesis e insumos médicos fueron los que presentaron un mayor incremento porcentual (14,32%) (Tabla 46).

Tabla 45.  
Solicitudes más frecuentes en las tutelas interpuestas en los regímenes contributivo y subsidiado  
Período 2013- 2014

|                                     | 2013        |         | 2014        |         | Variación % |
|-------------------------------------|-------------|---------|-------------|---------|-------------|
|                                     | Solicitudes | Part. % | Solicitudes | Part. % |             |
| Tratamientos                        | 56.993      | 31,40   | 52.281      | 28,94   | -8,27       |
| Medicamentos                        | 34.099      | 18,78   | 35.069      | 19,41   | 2,84        |
| Citas médicas                       | 24.438      | 13,46   | 25.659      | 14,20   | 5,00        |
| Prótesis, órtesis e insumos médicos | 20.332      | 11,20   | 23.243      | 12,87   | 14,32       |
| Cirugías                            | 19.811      | 10,91   | 20.293      | 11,23   | 2,43        |
| Imágenes diagnósticas               | 12.825      | 7,06    | 11.744      | 6,50    | -8,43       |
| Exámenes paraclínicos               | 9.822       | 5,41    | 9.680       | 5,36    | -1,45       |
| Procedimientos                      | 3.209       | 1,77    | 2.668       | 1,48    | -16,86      |
| Total                               | 181.529     | 100,00  | 180.637     | 100,00  | -0,49       |

Fuente: Corte Constitucional  
Cálculos: Defensoría del Pueblo

Tal como se mencionó, el 65,74% de las solicitudes fueron para reclamar servicios de salud que se encontraban en el POS. A excepción de las solicitudes por medicamentos, prótesis, órtesis e insumos médicos y procedimientos, los demás servicios POS presentaron porcentajes elevados. Las citas médicas especializadas (97,19%), exámenes paraclínicos (89,47%) y tratamientos (84,02%) se constituyen como los más altos (Tabla 46).

Dentro de las solicitudes POS, la mayor participación fue por tratamientos (36,99%), seguida de citas médicas especializadas (21%) y cirugías (13%). Con relación a las solicitudes No POS la mayor cantidad son por medicamentos (35,6%) y prótesis, órtesis e insumos médicos (33,68%).

Tabla 46.  
Distribución de los contenidos en Pos y No Pos  
Año 2014

|                                     | GENERAL     |         |         |             |         |         |             |         |
|-------------------------------------|-------------|---------|---------|-------------|---------|---------|-------------|---------|
|                                     | POS         |         |         | NO POS      |         |         | TOTAL       |         |
|                                     | Solicitudes | Part V% | Part H% | Solicitudes | Part V% | Part H% | Solicitudes | Part V% |
| Tratamientos                        | 43.929      | 36,99   | 84,02   | 8.352       | 13,49   | 15,98   | 52.281      | 28,94   |
| Medicamentos                        | 13.038      | 10,98   | 37,18   | 22.031      | 35,60   | 62,82   | 35.069      | 19,41   |
| Citas médicas                       | 24.939      | 21,00   | 97,19   | 720         | 1,16    | 2,81    | 25.659      | 14,20   |
| Prótesis, órtesis e insumos médicos | 2.398       | 2,02    | 10,32   | 20.845      | 33,68   | 89,68   | 23.243      | 12,87   |
| Cirugías                            | 15.437      | 13,00   | 76,07   | 4.856       | 7,85    | 23,93   | 20.293      | 11,23   |
| Imágenes diagnósticas               | 8.992       | 7,57    | 76,57   | 2.752       | 4,45    | 23,43   | 11.744      | 6,50    |
| Exámenes paraclínicos               | 8.661       | 7,29    | 89,47   | 1.019       | 1,65    | 10,53   | 9.680       | 5,36    |
| Procedimientos                      | 1.351       | 1,14    | 50,64   | 1.317       | 2,13    | 49,36   | 2.668       | 1,48    |
| Total                               | 118.745     | 100     | 65,74   | 61.892      | 100     | 34,26   | 180.637     | 100     |

Fuente: Corte Constitucional  
Cálculos: Defensoría del Pueblo

### 3.4.1.1. Contenidos más frecuentes en el régimen contributivo

En este régimen, las solicitudes disminuyeron 0,33% respecto de 2013. Los contenidos más frecuentes fueron los tratamientos (30,79%), seguidos de medicamentos (19,70%) y cirugías (13,26%). Los mayores incrementos porcentuales se observaron en exámenes paraclínicos y citas médicas especializadas, mientras que se presentaron disminuciones en procedimientos, tratamientos y medicamentos (Tabla 47).

Tabla 47.  
Solicitudes más frecuentes en las tutelas interpuestas en el régimen contributivo  
Periodo 2013- 2014

|                                     | 2013        |         | 2014        |         | Variación % |
|-------------------------------------|-------------|---------|-------------|---------|-------------|
|                                     | Solicitudes | Part. % | Solicitudes | Part. % |             |
| Tratamientos                        | 32.252      | 33,75   | 29.334      | 30,79   | -9,05       |
| Medicamentos                        | 19.982      | 20,91   | 18.768      | 19,70   | -6,08       |
| Cirugías                            | 11.936      | 12,49   | 12.629      | 13,26   | 5,81        |
| Prótesis, órtesis e insumos médicos | 11.796      | 12,34   | 11.804      | 12,39   | 0,07        |
| Citas médicas                       | 9.426       | 9,86    | 11.288      | 11,85   | 19,75       |
| Exámenes paraclínicos               | 3.203       | 3,35    | 4.902       | 5,15    | 53,04       |
| Imágenes diagnósticas               | 4.691       | 4,91    | 4.825       | 5,07    | 2,86        |
| Procedimientos                      | 2.287       | 2,39    | 1.707       | 1,79    | -25,36      |
| Total                               | 95.573      | 100,00  | 95.257      | 100,00  | -0,33       |

Fuente: Corte Constitucional  
Cálculos: Defensoría del Pueblo

Las solicitudes POS fueron del 61,7%, inferior a lo observado en 2013. Los tratamientos, las citas médicas especializadas y las cirugías se constituyeron como las solicitudes POS más recurrentes, mientras que los medicamentos y las prótesis, órtesis e insumos médicos hacen parte de las solicitudes No POS más habituales en este régimen (Tabla 48).

Tabla 48.  
Distribución de los contenidos en Pos y No Pos en el régimen contributivo  
Año 2014

|                                     | RÉGIMEN CONTRIBUTIVO |         |         |             |         |         |             |        |
|-------------------------------------|----------------------|---------|---------|-------------|---------|---------|-------------|--------|
|                                     | POS                  |         |         | NO POS      |         |         | TOTAL       |        |
|                                     | Solicitudes          | Part V% | Part H% | Solicitudes | Part V% | Part H% | Solicitudes | Part % |
| Tratamientos                        | 24.423               | 41,6    | 83,26   | 4.911       | 13,5    | 16,74   | 29.334      | 30,79  |
| Medicamentos                        | 5.517                | 9,4     | 29,40   | 13.251      | 36,3    | 70,60   | 18.768      | 19,70  |
| Cirugías                            | 9.065                | 15,4    | 71,78   | 3.564       | 9,8     | 28,22   | 12.629      | 13,26  |
| Prótesis, órtesis e insumos médicos | 1.111                | 1,9     | 9,41    | 10.693      | 29,3    | 90,59   | 11.804      | 12,39  |
| Citas médicas                       | 10.740               | 18,3    | 95,15   | 548         | 1,5     | 4,85    | 11.288      | 11,85  |
| Exámenes paraclínicos               | 4.201                | 7,1     | 85,70   | 701         | 1,9     | 14,30   | 4.902       | 5,15   |
| Imágenes diagnósticas               | 3.171                | 5,4     | 65,72   | 1.654       | 4,5     | 34,28   | 4.825       | 5,07   |
| Procedimientos                      | 544                  | 0,9     | 31,87   | 1.163       | 3,2     | 68,13   | 1.707       | 1,79   |
| Total                               | 58.772               | 100,0   | 61,70   | 36.485      | 100,0   | 38,30   | 95.257      | 100    |

Fuente: Corte Constitucional  
Cálculos: Defensoría del Pueblo

### 3.4.1.2. Contenidos más frecuentes en el régimen subsidiado

En el régimen subsidiado, las solicitudes disminuyeron en 0,67% respecto de 2013. Los requerimientos más frecuentes fueron los tratamientos (26,88%), seguido de medicamentos (19,09%) y citas médicas especializadas (16,83%). Las solicitudes de prótesis, órtesis e insumos médicos fueron las que tuvieron el mayor incremento, seguido de medicamentos (Tabla 49).

Tabla 49  
Solicitudes más frecuentes en las tutelas interpuestas en el régimen subsidiado  
Periodo 2013- 2014

|                                     | 2013        |         | 2014        |         | Variación % |
|-------------------------------------|-------------|---------|-------------|---------|-------------|
|                                     | Solicitudes | Part. % | Solicitudes | Part. % |             |
| Tratamientos                        | 24.741      | 28,78   | 22.947      | 26,88   | -7,25       |
| Medicamentos                        | 14.117      | 16,42   | 16.301      | 19,09   | 15,47       |
| Citas médicas                       | 15.012      | 17,46   | 14.371      | 16,83   | -4,27       |
| Prótesis, órtesis e insumos médicos | 8.536       | 9,93    | 11.439      | 13,40   | 34,01       |
| Cirugías                            | 7.875       | 9,16    | 7.664       | 8,98    | -2,68       |
| Imágenes diagnósticas               | 8.134       | 9,46    | 6.919       | 8,10    | -14,94      |
| Exámenes paraclínicos               | 6.619       | 7,70    | 4.778       | 5,60    | -27,81      |
| Procedimientos                      | 922         | 1,07    | 961         | 1,13    | 4,23        |
| Total                               | 85.956      | 100,00  | 85.380      | 100,00  | -0,67       |

Fuente: Corte Constitucional  
Cálculos: Defensoría del Pueblo

Las solicitudes POS fueron del 70,24%. A excepción de las solicitudes POS de prótesis, órtesis e insumos médicos y medicamentos, los demás servicios presentaron porcentajes elevados, en donde sobresalen las citas médicas especializadas (98,8%) y los exámenes paraclínicos (93,34%) (Tabla 50).

Al analizar solamente las solicitudes POS, la mayor participación fue de tratamientos (32,52%), seguido de citas médicas especializadas (23,68%) y medicamentos (12,54%).

Con relación a las solicitudes No POS, la mayor cantidad se presentaron en prótesis, órtesis e insumos médicos (39,96%) y medicamentos (34,56%).

Tabla 50.  
Distribución de los contenidos en Pos y No Pos en el régimen subsidiado  
Año 2014

|                                     | RÉGIMEN SUBSIDIADO |         |         |             |         |         |             |        |
|-------------------------------------|--------------------|---------|---------|-------------|---------|---------|-------------|--------|
|                                     | POS                |         |         | NO POS      |         |         | TOTAL       |        |
|                                     | Solicitudes        | Part V% | Part H% | Solicitudes | Part V% | Part H% | Solicitudes | Part % |
| Tratamientos                        | 19.506             | 32,52   | 85,00   | 3.441       | 13,54   | 15,00   | 22.947      | 26,88  |
| Medicamentos                        | 7.521              | 12,54   | 46,14   | 8.780       | 34,56   | 53,86   | 16.301      | 19,09  |
| Citas médicas                       | 14.199             | 23,68   | 98,80   | 172         | 0,68    | 1,20    | 14.371      | 16,83  |
| Prótesis, órtesis e insumos médicos | 1.287              | 2,15    | 11,25   | 10.152      | 39,96   | 88,75   | 11.439      | 13,40  |
| Cirugías                            | 6.372              | 10,62   | 83,14   | 1.292       | 5,09    | 16,86   | 7.664       | 8,98   |
| Imágenes diagnósticas               | 5.821              | 9,71    | 84,13   | 1.098       | 4,32    | 15,87   | 6.919       | 8,10   |
| Exámenes paraclínicos               | 4.460              | 7,44    | 93,34   | 318         | 1,25    | 6,66    | 4.778       | 5,60   |
| Procedimientos                      | 807                | 1,35    | 83,98   | 154         | 0,61    | 16,02   | 961         | 1,13   |
| Total                               | 59.973             | 100     | 70,24   | 25.407      | 100     | 29,76   | 85.380      | 100    |

Fuente: Corte Constitucional  
Cálculos: Defensoría del Pueblo

### 3.4.2. Contenidos POS y No POS en tratamientos

Los tratamientos se constituyeron como las solicitudes más frecuentes en las tutelas, tal como ha ocurrido en los últimos años. Sin embargo, en 2014 se aprecia un disminución en las cifras absolutas de 8,27%, tanto en los tratamientos incluidos en el POS como en los No POS.

La participación de tratamientos incluidos en el POS fue de 84,02% cifra similar a la observada en el año anterior (Tabla 51) (Gráfica 10).

Las principales solicitudes por tratamientos estuvieron relacionadas con las especialidades de neurología, psiquiatría, oncología, ortopedia, y oftalmología, que acumulan el 51,79%. Las especialidades que tuvieron incrementos porcentuales más altos fueron infectología (VIH/sida), cardiología, odontología y neumología; mientras que se presentaron disminuciones en dermatología, neurocirugía y medicina interna.

Tabla 51.  
Distribución de los tratamientos en Pos y No Pos  
Periodo 2013-2014

|        | 2013        |         | 2014        |         | Variación<br>% |
|--------|-------------|---------|-------------|---------|----------------|
|        | Solicitudes | Part. % | Solicitudes | Part. % |                |
| Pos    | 48.442      | 85,00   | 43.929      | 84,02   | -9,32          |
| No Pos | 8.551       | 15,00   | 8.352       | 15,98   | -2,33          |
| Total  | 56.993      | 100,00  | 52.281      | 100,00  | -8,27          |

Fuente: Corte Constitucional  
Cálculos: Defensoría del Pueblo

Gráfica 10.  
Contenido POS en Tratamientos  
Periodo 2013-2014

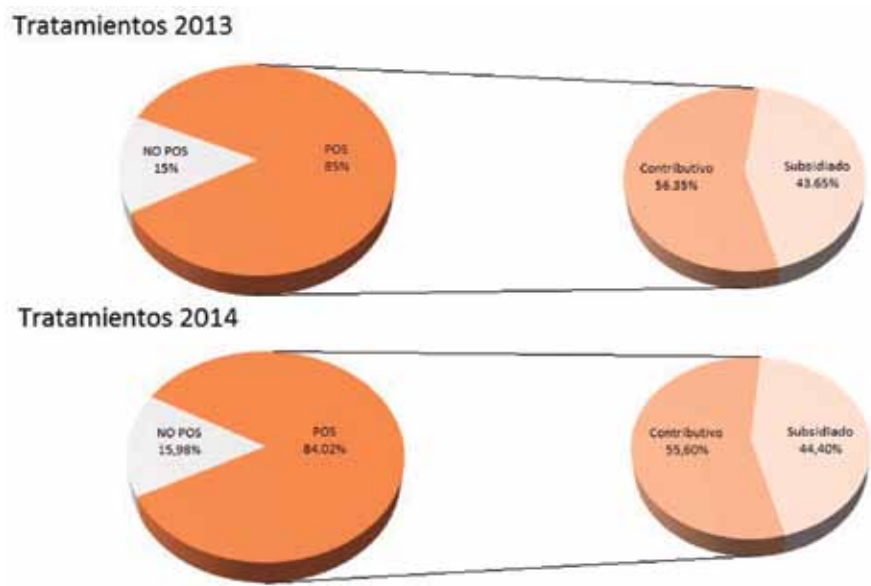

Al observar la distribución dentro de cada régimen, son mayores las solicitudes de tratamientos en el contributivo (56,11%) y la composición del POS en los dos regímenes es similar. (Tabla 52).

En el régimen contributivo, las solicitudes más frecuentes fueron los tratamientos integrales. Se destacan los trastornos mentales y del comportamiento (alzheimer, retraso mental, ansiedad, esquizofrenia, hiperactividad y trastorno afectivo bipolar), seguido de los oncológicos (próstata, cervix y encéfalo), y los del sistema nervioso (epilepsia, parálisis cerebral infantil y trastornos del sueño). La segunda solicitud dentro de los tratamientos más solicitados fue el de enfermera domiciliaria, seguido de hospitalización, diferentes terapias y tratamiento neuropsicológico.

Respecto a solicitudes POS en el régimen contributivo, los tratamientos integrales (circulatorio, neurológico y oncológico) continúan en primer lugar, seguido de enfermera domiciliaria, terapia física, terapia ocupacional, hospitalización, terapia neurológica, terapia de lenguaje, quimio y radioterapia, terapia respiratoria y atención domiciliaria. En cuanto a lo No POS, están los tratamientos integrales (neurológico y tratamientos odontológicos especializados), las terapias ABBA, musicoterapia y terapias asistidas con animales.

En el régimen subsidiado, las solicitudes más frecuentes también fueron los tratamientos integrales. Igualmente se destacan los oncológicos (mama, piel y sistema gastrointestinal), seguido de las enfermedades mentales y de comportamiento (uso de sustancias psicoactivas, retraso mental y trastorno afectivo bipolar) y, del sistema circulatorio (accidentes cerebrovasculares, hipertensión arterial y secuelas de enfermedades cerebrovasculares). La segunda solicitud dentro de los tratamientos más solicitados fueron el de enfermera domiciliaria, seguido de hospitalización, diferentes terapias y rehabilitación de farmacodependencia.

Respecto a solicitudes POS, los tratamientos integrales (oncológico, trastorno mental y sistema circulatorio) continúan en primer lugar, seguido de terapia física, hospitalización, enfermera domiciliaria, terapia de lenguaje, quimio y radioterapia, terapia ocupacional, neurodesarrollo, psicoterapia y hemodiálisis. En cuanto a lo No POS, también están los tratamientos integrales (trastorno mental, oncológico y circulatorio), terapia ABBA, musicoterapia, hidroterapia, terapia con perros y equinoterapia. Hay que resaltar, que el hecho de que los usuarios afiliados a este régimen tengan limitaciones de acceso, tanto para psicoterapia como en hospitalización, hace que tengan que acudir a la acción de tutela para continuar con los tratamientos.

Tabla 52.  
Distribución de los tratamientos según régimen  
Periodo 2014

|        | RÉGIMEN      |         |         |             |         |         | Total       |         |         |
|--------|--------------|---------|---------|-------------|---------|---------|-------------|---------|---------|
|        | Contributivo |         |         | Subsidiado  |         |         |             |         |         |
|        | Solicitudes  | Part V% | Part H% | Solicitudes | Part V% | Part H% | Solicitudes | Part V% | Part H% |
| Pos    | 24.423       | 83,26   | 55,60   | 19.506      | 85,00   | 44,40   | 43.929      | 84,02   | 100,00  |
| No Pos | 4.911        | 16,74   | 58,80   | 3.441       | 15,00   | 41,20   | 8.352       | 15,98   | 100,00  |
| Total  | 29.334       | 100,00  | 56,11   | 22.947      | 100,00  | 43,89   | 52.281      | 100,00  | 100,00  |

Fuente: Corte Constitucional  
Cálculos: Defensoría del Pueblo

### 3.4.3. Contenidos POS y No POS en medicamentos

La solicitud de medicamentos fue la segunda causa de las tutelas y su frecuencia es similar a la observada en 2013.

Las principales solicitudes por medicamentos estuvieron relacionadas con las especialidades de neurología, oncología, endocrinología, neumología y medicina interna. Las especialidades que tuvieron incrementos porcentuales más altos fueron urología, cardiología, neumología, cirugía general y vascular; mientras que se presentan disminuciones en neurocirugía, pediatría, gineco-obstetricia, otorrinolaringología y oftalmología.

Con relación a 2013, las solicitudes de medicamentos tuvieron un incremento de 2,84%, básicamente por mayores requerimientos de aquellos que estaban contenidos en el POS, cuyo crecimiento fue de 14,23%, aunque los No POS siguen siendo mayoritarios (Tabla 53) (Gráfica 11).

Tabla 53.  
Distribución de los medicamentos en Pos y No Pos  
Periodo 2013-2014

|        | 2013        |         | 2014        |         | Variación % |
|--------|-------------|---------|-------------|---------|-------------|
|        | Solicitudes | Part. % | Solicitudes | Part. % |             |
| Pos    | 11.414      | 33,47   | 13.038      | 37,18   | 14,23       |
| No Pos | 22.685      | 66,53   | 22.031      | 62,82   | -2,88       |
| Total  | 34.099      | 100,00  | 35.069      | 100,00  | 2,84        |

Fuente: Corte Constitucional  
Cálculos: Defensoría del Pueblo

Gráfica 11.  
Contenido POS en Medicamentos  
Periodo 2013-2014

Medicamentos 2013

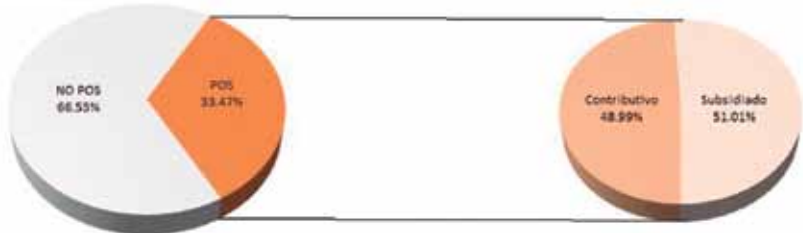

Medicamentos 2014

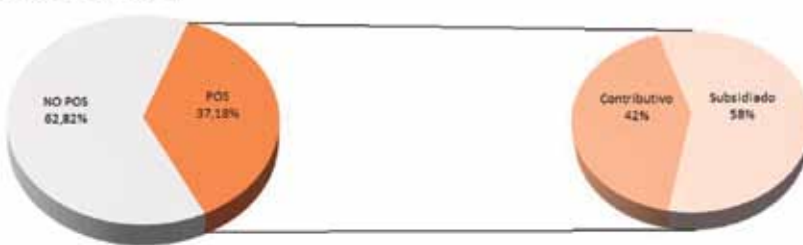

Tabla 54.  
Distribución de los medicamentos según régimen  
Periodo 2014

|        | RÉGIMEN      |         |         |             |         |         | Total       |         |         |
|--------|--------------|---------|---------|-------------|---------|---------|-------------|---------|---------|
|        | Contributivo |         |         | Subsidiado  |         |         |             |         |         |
|        | Solicitudes  | Part V% | Part H% | Solicitudes | Part V% | Part H% | Solicitudes | Part V% | Part H% |
| Pos    | 5.517        | 29,40   | 42,31   | 7.521       | 46,14   | 57,69   | 13.038      | 37,18   | 100,00  |
| No Pos | 13.251       | 70,60   | 60,15   | 8.780       | 53,86   | 39,85   | 22.031      | 62,82   | 100,00  |
| Total  | 18.768       | 100,00  | 53,52   | 16.301      | 100,00  | 46,48   | 35.069      | 100,00  | 100,00  |

Fuente: Corte Constitucional  
Cálculos: Defensoría del Pueblo

Teniendo en cuenta la composición en cada régimen, son superiores las solicitudes POS en el subsidiado frente al contributivo (Tabla 54)

En el régimen contributivo, los diez (10) medicamentos POS más solicitados fueron: quetiapina, oxígeno, risperidona, esomeprazol, losartan, levetiracetam, carbamazepina, fluoxetina, palivizumab y omeprazol.

Preocupa a la Defensoría que en el estudio actual y en todos los anteriores, el oxígeno haya salido como uno de los medicamentos más solicitados, al igual que el losartan (antihipertensivo) y el omeprazol (utilizado para enfermedades gástricas), medicamentos básicos que por ningún motivo deberían ser solicitados por tutela.

En este régimen, los medicamentos No POS más requeridos fueron los complementos nutricionales, pregabalina, cremas antiescaras, memantina, duloxetine, sildenafil, isotretinoína, cremas antipaúlitis y carboximetilcelulosa.

En el caso de los complementos nutricionales se deben en gran parte a la necesidad de los pacientes crónicos y de alto costo en recuperarse nutricionalmente para tolerar los tratamientos.

En el régimen subsidiado, los medicamentos POS más solicitados fueron oxígeno, insulinas, ASA, omeprazol, carvedilol, acetaminofén, atorvastatina, quetiapina, losartan y clopidogrel. En cuanto a los No POS los más requeridos fueron los complementos nutricionales, crema antiescaras, montelukast, alimpro, acetaminofén + codeína, cilostazol, crema antipaúlitis, pregabalina, glucosamina, y tamsulosina.

### 3.4.4. Contenidos POS y No POS en Citas médicas especializadas

Las tutelas por citas médicas especializadas continuaron su ritmo ascendente en 2014 básicamente por la falta de oportunidad en la atención, lo que impide a los usuarios acceder a otros servicios. En este periodo su incremento fue de 5% (Tabla 54). Esta falta de oportunidad se debe, entre otros motivos, a la escasez de algunas especialidades y subespecialidades. En varias oportunidades esta entidad ha solicitado al Gobierno Nacional buscar estrategias que permitan abrir cupos en las especialidades, pero han pasado varios años sin que el problema se solucione.

Las principales solicitudes por citas médicas especializadas fueron por neurología, oncología, ortopedia, oftalmología, gastroenterología, endocrinología, neumología y medicina interna.

En el régimen contributivo, las citas médicas POS más requeridas fueron ortopedia, neurología, urología, cardiología, psicología, gastroenterología, medicina interna, endocrinología, fisiatría y pediatría.

En el caso de ortopedia, los pacientes manifiestan que la necesidad posterior de insumos para culminar los tratamientos hace que las citas se demoren. En referencia a medicina interna, como se ha mencionado en estudios anteriores, se debe a la dificultad de conseguir recurso humano, ya que la mayoría de ellos se encuentran cursando subespecialidades.

En el régimen subsidiado, las citas más requeridas fueron neurología, ortopedia, urología, medicina interna, cirugía general, ginecología, otorrinolaringología, gastroenterología, pediatría y cardiología. En este régimen, la dificultad se presenta especialmente en zonas alejadas, por falta de recurso humano y red de prestadores.

Tabla 55.  
Distribución de las citas médicas especializadas en Pos y No Pos  
Periodo 2013-2014

|        | 2013        |         | 2014        |         | Variación % |
|--------|-------------|---------|-------------|---------|-------------|
|        | Solicitudes | Part. % | Solicitudes | Part. % |             |
| Pos    | 24.392      | 99,81   | 24.939      | 97,19   | 2,24        |
| No Pos | 46          | 0,19    | 720         | 2,81    | 1465        |
| Total  | 24.438      | 100,00  | 25.659      | 100,00  | 5,00        |

Fuente: Corte Constitucional  
Cálculos: Defensoría del Pueblo

Gráfica 12.  
Contenido POS en citas médicas especializadas  
Periodo 2013-2014

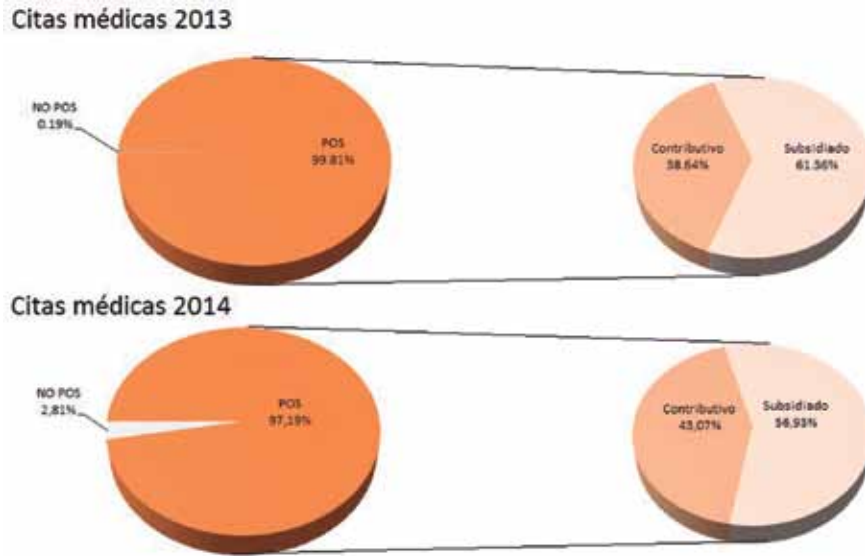

La mayoría de solicitudes de citas médicas especializadas se encuentra en el POS (Gráfica 12). El 56,93% de las solicitudes corresponde al régimen subsidiado y las escasas citas No POS (Tabla 56) corresponden a subespecialidades odontológicas.

Tabla 56.  
Distribución de las citas médicas especializadas según régimen  
Periodo 2014

|        | RÉGIMEN      |         |         |             |         |         | Total       |         |         |
|--------|--------------|---------|---------|-------------|---------|---------|-------------|---------|---------|
|        | Contributivo |         |         | Subsidiado  |         |         |             |         |         |
|        | Solicitudes  | Part V% | Part H% | Solicitudes | Part V% | Part H% | Solicitudes | Part V% | Part H% |
| Pos    | 10.740       | 95,15   | 43,07   | 14.199      | 98,80   | 56,93   | 24.939      | 97,19   | 100,00  |
| No Pos | 548          | 4,85    | 76,11   | 172         | 1,20    | 23,89   | 720         | 2,81    | 100,00  |
| Total  | 11.288       | 100,00  | 43,99   | 14.371      | 100,00  | 56,01   | 25.659      | 100,00  | 100,00  |

Fuente: Corte Constitucional  
Cálculos: Defensoría del Pueblo

#### 3.4.5. Contenidos POS y No POS en prótesis, órtesis e insumos

Las tutelas por prótesis, órtesis e insumo médicos fueron las de mayor crecimiento porcentual en 2014 (14,32%).

Las principales solicitudes por prótesis, órtesis e insumos médicos estuvieron relacionadas con las especialidades de neurología, urología, ortopedia, oncología y endocrinología. Las especialidades que tuvieron los incrementos porcentuales más altos durante 2014 fueron reumatología, neumología, urología, otorrinolaringología y endocrinología; mientras que en las especialidades de neurología, odontología, medicina interna, nefrología y psiquiatría se presentaron disminuciones.

Aunque estas solicitudes, tuvieron un incremento del 14,32%, se debe principalmente a solicitudes No Pos (Tabla 57). La mayoría de solicitudes fueron por prótesis, órtesis e insumo médicos No POS (Gráfica 13).

Tabla 57.  
Distribución de las prótesis, órtesis e insumos en Pos y No Pos  
Periodo 2013-2014

|        | 2013        |         | 2014        |         | Variación % |
|--------|-------------|---------|-------------|---------|-------------|
|        | Solicitudes | Part. % | Solicitudes | Part. % |             |
| Pos    | 2.676       | 13,16   | 2.398       | 10,32   | -10,39      |
| No Pos | 17.656      | 86,84   | 20.845      | 89,68   | 18,06       |
| Total  | 20.332      | 100,00  | 23.243      | 100,00  | 14,32       |

Fuente: Corte Constitucional  
Cálculos: Defensoría del Pueblo

Gráfica 13.  
Contenido POS en prótesis, órtesis e insumos  
Periodo 2013-2014

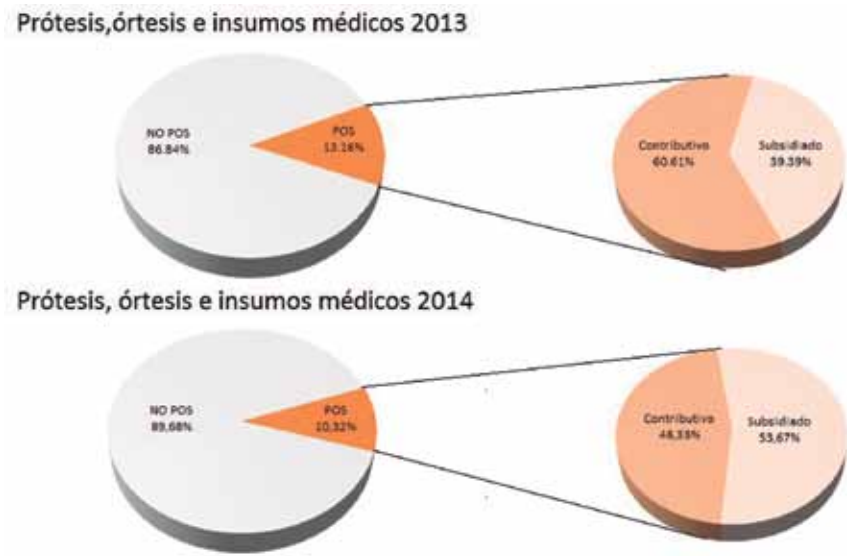

La distribución por régimen estuvo en proporciones similares, igual como sucedió en la distribución POS y No POS al interior de cada uno de ellos (Tabla 58).

Tabla 58.  
Distribución de las prótesis, órtesis e insumos según régimen  
Periodo 2014

|        | RÉGIMEN      |         |         |             |         |         | Total       |         |         |
|--------|--------------|---------|---------|-------------|---------|---------|-------------|---------|---------|
|        | Contributivo |         |         | Subsidiado  |         |         |             |         |         |
|        | Solicitudes  | Part V% | Part H% | Solicitudes | Part V% | Part H% | Solicitudes | Part V% | Part H% |
| Pos    | 1.111        | 9,41    | 46,33   | 1.287       | 11,25   | 53,67   | 2.398       | 10,32   | 100,00  |
| No Pos | 10.693       | 90,59   | 51,30   | 10.152      | 88,75   | 48,70   | 20.845      | 89,68   | 100,00  |
| Total  | 11.804       | 100,00  | 50,79   | 11.439      | 100,00  | 49,21   | 23.243      | 100,00  | 100,00  |

Fuente: Corte Constitucional  
Cálculos: Defensoría del Pueblo

En el régimen contributivo, las mayores solicitudes POS de prótesis, órtesis e insumos correspondieron a kit de glucometría (solo pacientes insulínodpendientes), kit de colostomía (solo para cáncer de colon), CPAP, prótesis de rodilla, material de osteosíntesis, lente intraocular, prótesis de cadera y prótesis ocular. Con relación a lo No POS, se encuentran los pañales, sillas de rueda, pañitos húmedos, camas hospitalarias, guantes, colchón antiescaras, lentes, cojín antiescaras y audífonos.

En el régimen subsidiado, las mayores solicitudes de prótesis, órtesis e insumos incluidas en el POS fueron: kit de glucometría, kit de colostomía, material de osteosíntesis, prótesis miembro inferior, concentradora de oxígeno, lentes bifocales y audífonos. Con relación a lo No POS, se encontraron pañales, sillas de ruedas, pañitos, colchón antiescaras, guantes, camas hospitalarias, cojín antiescaras, gafas con especificaciones y tapabocas.

En este ítem se observan la persistencia de las solicitudes tendientes al cuidado de pacientes crónicos, cuyo fin primordial es la mejora de la calidad de vida de los pacientes, especialmente en el caso de las secuelas de los accidentes cerebrovasculares.

### 3.4.6. Contenidos POS y No POS en cirugías

Las principales solicitudes en las tutelas por cirugías estuvieron relacionadas con las especialidades de ortopedia, oncología, oftalmología, gastroenterología y cirugía general. Las especialidades que tuvieron los incrementos porcentuales más altos durante 2014 fueron reumatología, odontología, oftalmología, oncología y cirugía general; mientras que en las especialidades de neurocirugía, urología, neumología y dermatología presentaron disminuciones.

Las solicitudes por cirugías aumentaron en 2,43% (Tabla 59), representado en cirugías No Pos, aunque el mayor número de cirugías solicitadas se encuentran incluidas en el POS (Gráfica 14).

Tabla 59.  
Distribución de las cirugías en Pos y No Pos  
Periodo 2013-2014

|        | 2013        |         | 2014        |         | Variación % |
|--------|-------------|---------|-------------|---------|-------------|
|        | Solicitudes | Part. % | Solicitudes | Part. % |             |
| Pos    | 16.645      | 84,02   | 15.437      | 76,07   | -7,26       |
| No Pos | 3.166       | 15,98   | 4.856       | 23,93   | 53,38       |
| Total  | 19.811      | 100,00  | 20.293      | 100,00  | 2,43        |

Fuente: Corte Constitucional  
Cálculos: Defensoría del Pueblo

Gráfica 14.  
Contenido POS en cirugías  
Periodo 2013-2014

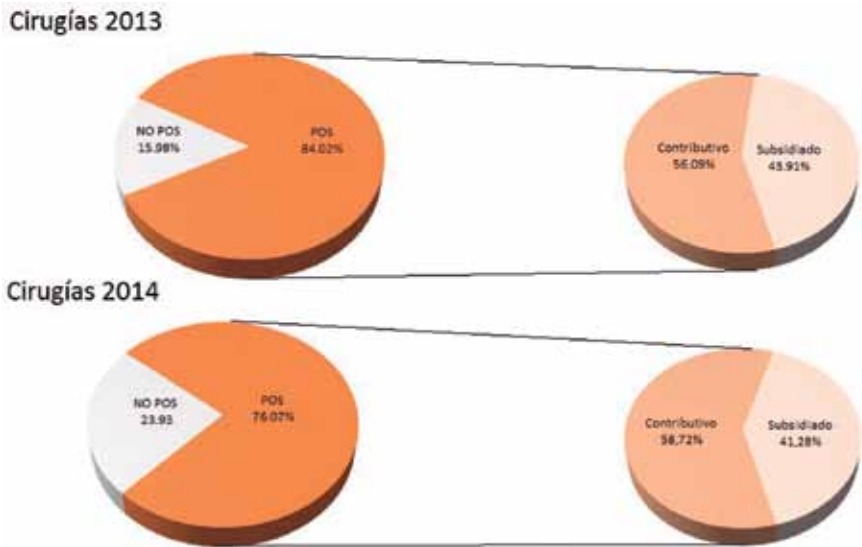

Al observar la distribución por régimen, son mayores las solicitudes de cirugías en el régimen contributivo (62,23%) y la composición del POS dentro de cada régimen es superior en el subsidiado (83,14%) (Tabla 60).

Tabla 60.  
Distribución de las cirugías según régimen  
Periodo 2014

|        | RÉGIMEN      |         |         |             |         |         | Total       |         |         |
|--------|--------------|---------|---------|-------------|---------|---------|-------------|---------|---------|
|        | Contributivo |         |         | Subsidiado  |         |         |             |         |         |
|        | Solicitudes  | Part V% | Part H% | Solicitudes | Part V% | Part H% | Solicitudes | Part V% | Part H% |
| Pos    | 9.065        | 71,78   | 58,72   | 6.372       | 83,14   | 41,28   | 15.437      | 76,07   | 100,00  |
| No Pos | 3.564        | 28,22   | 73,39   | 1.292       | 16,86   | 26,61   | 4.856       | 23,93   | 100,00  |
| Total  | 12.629       | 100,00  | 62,23   | 7.664       | 100,00  | 37,77   | 20.293      | 100,00  | 100,00  |

Fuente: Corte Constitucional  
Cálculos: Defensoría del Pueblo

En el régimen contributivo, las mayores solicitudes de cirugías incluidas en el POS, correspondieron a: reemplazo de rodilla, cirugía bariátrica, herniorrafia inguinal, histerectomía abdominal, reemplazo total de cadera, colecistectomía, facoemulsificación + LIO, herniorrafia umbilical, septoplastia y eventrorrafas con malla. Con relación a lo No POS, se encontraron las mamoplastias de reducción, mastopexia, elevación seno maxilar y la abdominoplastia. A pesar que la mamoplastia de reducción se encuentra en el POS cuando se busca corregir alteraciones fisiológicas, un gran número de estas cirugías son solicitadas con fines estéticos, tal como ocurre con las cirugías posteriores a la bariátrica cuyo fin es mejorar la apariencia física.

En el régimen subsidiado, las solicitudes de cirugías incluidas en el POS fueron: cirugía bariátrica, facoemulsificación + LIO, exodoncias, herniorrafia inguinal, colecistectomía, herniorrafia umbilical, extracción extracapsular de cristalino, timpanoplastia, colporrafas y resección de pterigio. En cuanto a lo No POS, se encontraron solicitudes por abdominoplastia, mastopexia y mamoplastia de reducción con fines estéticos.

### 3.4.7. Contenidos POS y No POS en imágenes diagnósticas

Las principales solicitudes en las tutelas por imágenes diagnósticas estuvieron relacionadas con las especialidades de neurología, oncología, ortopedia, gastroenterología y neumología. Las especialidades que tuvieron incrementos durante 2014 fueron neurología, gastroenterología, cirugía general y cardiología. Las demás presentaron disminuciones.

En general, las solicitudes por imágenes diagnósticas tuvieron una disminución del 8,43%, principalmente en solicitudes POS, que disminuyeron 24,53% con relación a 2013. Sin embargo, estas solicitudes siguen siendo mayoritarias (Tabla 61) (Gráfica 15).

Tabla 61.  
Distribución de las imágenes diagnósticas en Pos y No Pos  
Periodo 2013-2014

|        | 2013        |         | 2014        |         | Variación<br>% |
|--------|-------------|---------|-------------|---------|----------------|
|        | Solicitudes | Part. % | Solicitudes | Part. % |                |
| Pos    | 11.914      | 92,90   | 8.992       | 76,57   | -24,53         |
| No Pos | 911         | 7,10    | 2.752       | 23,43   | 202,09         |
| Total  | 12.825      | 100,00  | 11.744      | 100,00  | -8,43          |

Fuente: Corte Constitucional  
Cálculos: Defensoría del Pueblo

Gráfica 15.  
Contenido POS en imágenes diagnósticas  
Periodo 2013-2014

#### Imágenes 2013

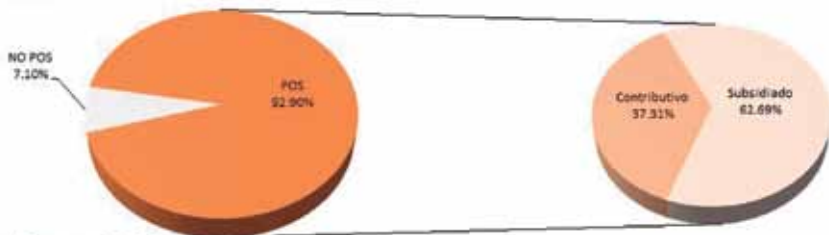

#### Imágenes 2014

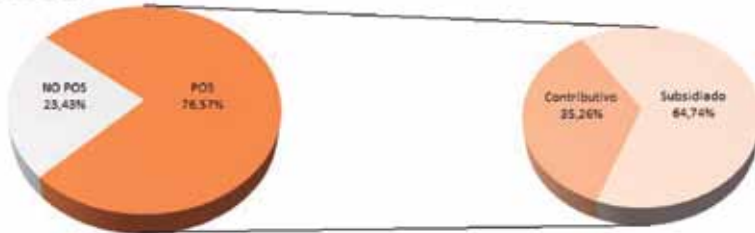

Al observar la distribución por régimen, son mayores las solicitudes de imágenes diagnósticas en el subsidiado (58,92%) y la composición del POS dentro de cada uno de los regímenes es superior en el subsidiado (Tabla 62).

Tabla 62.  
Distribución de las imágenes diagnósticas según régimen  
Periodo 2014

|        | RÉGIMEN      |         |         |             |         |         | Total       |         |         |
|--------|--------------|---------|---------|-------------|---------|---------|-------------|---------|---------|
|        | Contributivo |         |         | Subsidiado  |         |         |             |         |         |
|        | Solicitudes  | Part V% | Part H% | Solicitudes | Part V% | Part H% | Solicitudes | Part V% | Part H% |
| Pos    | 3.171        | 65,72   | 35,26   | 5.821       | 84,13   | 64,74   | 8.992       | 76,57   | 100,00  |
| No Pos | 1.654        | 34,28   | 60,10   | 1.098       | 15,87   | 39,90   | 2.752       | 23,43   | 100,00  |
| Total  | 4.825        | 100,00  | 41,08   | 6.919       | 100,00  | 58,92   | 11.744      | 100,00  | 100,00  |

Fuente: Corte Constitucional  
Cálculos: Defensoría del Pueblo

En el régimen contributivo, las solicitudes de imágenes diagnósticas incluidas en el POS fueron: resonancias nucleares magnéticas, TAC abdominal, endoscopia de vías digestivas altas (EVDA), fibrobroncoscopia, TAC torácico, histerosalpingografía, ecografía renal y vías urinarias, ecocardiograma, urotac y gammagrafía ósea. Respecto a lo No POS, las solicitudes más frecuentes fueron: TAC abdominal contrastado, resonancia nuclear magnética contrastada, ecocardiograma transesofágico, angiotac de tórax, radiografía nuclear de pelvis contrastada y tomografía ópticas coherentes.

En el régimen subsidiado, las solicitudes de imágenes incluidas en el POS fueron: EVDA, resonancia nuclear magnética cerebral, electrocardiograma (EKG), radiografía de tórax, TAC abdominal, TAC cráneo simple, resonancia nuclear magnética de columna lumbo sacra, gammagrafía ósea, electroencefalograma y TAC de pelvis. Respecto a lo No POS se encontró el TAC abdominal contrastado, nasofibrolarinoscopia, TAC reconstructivo 3D de cara y TAC de tórax y cuello contrastado.

### 3.4.8. Contenidos POS y No POS en exámenes paraclínicos

Las principales solicitudes en las tutelas por exámenes paraclínicos estuvieron relacionadas con las especialidades de oncología, neurología, gastroenterología, gineco-obstetricia y neumología. Las especialidades que tuvieron incrementos durante 2014 fueron gastroenterología, neumología, ortopedia, neurología y cardiología, los demás presentaron disminuciones.

En general, las solicitudes por exámenes paraclínicos tuvieron una disminución del 1,45% principalmente en solicitudes POS, que disminuyeron 7,43%. Sin embargo, estas siguen siendo mayoritarias (Tabla 63) (Gráfica 16).

Tabla 63.  
Distribución de los exámenes paraclínicos en Pos y No Pos  
Período 2013-2014

|        | 2013        |         | 2014        |         | Variación % |
|--------|-------------|---------|-------------|---------|-------------|
|        | Solicitudes | Part. % | Solicitudes | Part. % |             |
| Pos    | 11.914      | 92,90   | 8.992       | 76,57   | -24,53      |
| No Pos | 911         | 7,10    | 2.752       | 23,43   | 202,09      |
| Total  | 12.825      | 100,00  | 11.744      | 100,00  | -8,43       |

Fuente: Corte Constitucional  
Cálculos: Defensoría del Pueblo

Gráfica 16.  
Contenido POS en exámenes paraclínicos  
Período 2013-2014

#### Exámenes 2013

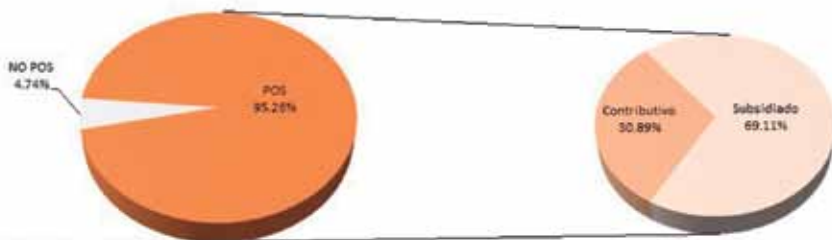

#### Exámenes 2014

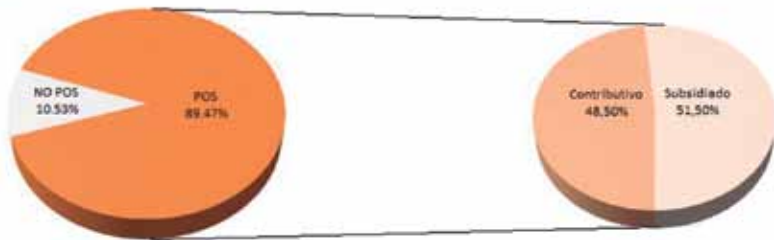

Al observar la distribución por régimen y por servicios POS y No POS, las proporciones son similares. (Tabla 64).

Tabla 64.  
Distribución de los exámenes paraclínicos según régimen  
Periodo 2014

|        | RÉGIMEN      |         |         |             |         |         | Total       |         |         |
|--------|--------------|---------|---------|-------------|---------|---------|-------------|---------|---------|
|        | Contributivo |         |         | Subsidiado  |         |         |             |         |         |
|        | Solicitudes  | Part V% | Part H% | Solicitudes | Part V% | Part H% | Solicitudes | Part V% | Part H% |
| Pos    | 4.201        | 85,70   | 48,50   | 4.460       | 93,34   | 51,50   | 8.661       | 89,47   | 100,00  |
| No Pos | 701          | 14,30   | 68,79   | 318         | 6,66    | 31,21   | 1.019       | 10,53   | 100,00  |
| Total  | 4.902        | 100,00  | 50,64   | 4.778       | 100,00  | 49,36   | 9.680       | 100,00  | 100,00  |

Fuente: Corte Constitucional  
Cálculos: Defensoría del Pueblo

En el régimen contributivo, las solicitudes de exámenes paraclínicos incluidos en el POS correspondieron a: hemogramas, pruebas de coagulación, hormona estimulante de la tiroides (TSH), colesterol total, glicemia, velocidad de sedimentación globular (VSG), triglicéridos, proteína C reactiva (PCR), ácido fólico en suero y prolactina. Con relación a lo No POS se encontró el Breast cáncer (BRCA) 1 y 2, secuenciación completa gen phox 2b, anti transglutaminasa IgA y alérgenos laborales.

Es de anotar la alta frecuencia de acciones de tutela por solicitudes de exámenes paraclínicos básicos, necesarios para confirmaciones diagnósticas y para definir conducta, además de ser económicos.

En el régimen subsidiado, se encontró los hemogramas, las pruebas de coagulación, creatinina, transaminasas, glicemia, TSH, bilirrubinas, colesterol total, uroanálisis y ácido fólico en suero. Respecto a lo No POS lo más solicitado fue el anticuerpos orgánicos cuantitativos, herp parl, sinoptofizina e hibridación genómica comparativa por micro alérgenos.

### 3.4.9. Contenidos POS y No POS en procedimientos

Las principales solicitudes en las tutelas por procedimientos estuvieron relacionadas con las especialidades de odontología, oncología, neurología, gastroenterología y cardiología. Las especialidades que tuvieron incrementos durante 2014 fueron cardiología, neurología y gastroenterología. Los demás presentaron disminuciones.

En general, las solicitudes por procedimientos tuvieron una disminución del 16,86%, principalmente en solicitudes POS, que se redujeron en 37,51% (Tabla 65). La distribución entre POS y No POS se encuentra en proporciones similares (Gráfica 17).

Tabla 65.  
Distribución de los procedimientos en Pos y No Pos  
Periodo 2013-2014

|        | 2013        |         | 2014        |         | Variación % |
|--------|-------------|---------|-------------|---------|-------------|
|        | Solicitudes | Part. % | Solicitudes | Part. % |             |
| Pos    | 2.162       | 67,37   | 1.351       | 50,64   | -37,51      |
| No Pos | 1.047       | 32,63   | 1.317       | 49,36   | 25,79       |
| Total  | 3.209       | 100,00  | 2.668       | 100,00  | -16,86      |

Fuente: Corte Constitucional  
Cálculos: Defensoría del Pueblo

Gráfica 17.  
Contenido POS en procedimientos  
Periodo 2013-2014

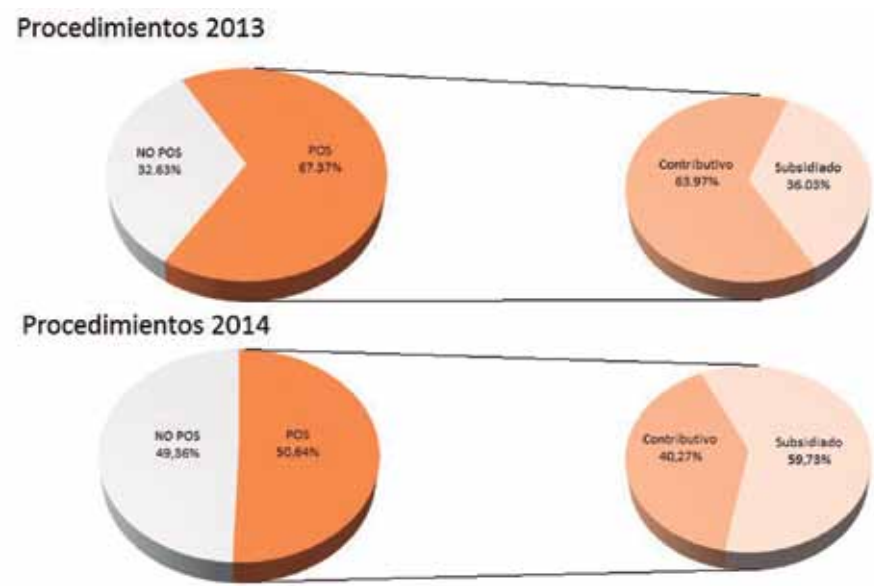

Al observar la distribución por régimen son mayores las solicitudes en el contributivo, aunque la distribución POS al interior de cada uno de ellos es superior en el subsidiado (Tabla 66).

Tabla 66.  
Distribución de los procedimientos según régimen  
Periodo 2014

|        | RÉGIMEN      |         |         |             |         |         | Total       |         |         |
|--------|--------------|---------|---------|-------------|---------|---------|-------------|---------|---------|
|        | Contributivo |         |         | Subsidiado  |         |         |             |         |         |
|        | Solicitudes  | Part V% | Part H% | Solicitudes | Part V% | Part H% | Solicitudes | Part V% | Part H% |
| Pos    | 544          | 31,87   | 40,27   | 807         | 83,98   | 59,73   | 1.351       | 50,64   | 100,00  |
| No Pos | 1.163        | 68,13   | 88,31   | 154         | 16,02   | 11,69   | 1.317       | 49,36   | 100,00  |
| Total  | 1.707        | 100,00  | 63,98   | 961         | 100,00  | 36,02   | 2.668       | 100,00  | 100,00  |

Fuente: Corte Constitucional  
Cálculos: Defensoría del Pueblo

En el régimen contributivo, las mayores solicitudes de procedimientos incluidos en el POS correspondieron a biopsias, litotripcias y alisado radicular. Con relación a lo No POS, la aplicación de medicamentos biológicos y los procedimientos odontológicos, fueron los más frecuentes.

En el régimen subsidiado, las mayores solicitudes de procedimientos incluidos en el POS fueron las biopsias, reprogramación de marcapaso, alisado radicular y obturación dental con resina. Respecto a lo No POS primaron los procedimientos odontológicos. Es de resaltar que muchos de los procedimientos de subespecialidades odontológicas, no se encuentran en el POS, por lo que la única manera de acceder a ellos es a través de la Acción de Tutela.

### 3.5. La tutela y el derecho a la seguridad social

El derecho a la Seguridad Social está reconocido en la normatividad colombiana como un derecho constitucional fundamental. Así lo establecen los artículos 48 y 49 de la Constitución Política, que lo menciona en dos sentidos, uno como un derecho irrenunciable y otro como un servicio público, en cuyo caso el Estado está obligado a garantizar su ejecución. Dicha protección ha sido reforzada a través de instrumentos internacionales que han establecido su carácter de irrenunciable y de universal.

Teniendo en cuenta lo anterior, este capítulo presenta los resultados de las tutelas que invocaron el derecho a la seguridad social en 2014. Durante este periodo, el derecho a la seguridad social fue el quinto más invocado en las tutelas y su participación dentro de las mismas fue de 10,85% (Tabla 67). El 60,9% de estas tutelas también invocó el derecho a la salud, razón por la cual el derecho a la seguridad social se analizará excluyendo dichas tutelas, centrándose en 21.118, que se incrementaron en 1,97% respecto a 2013.

Tabla 67  
Participación de las tutelas en Seguridad Social  
Periodo 2011- 2014

| Año   | Tutelas   | Seguridad Social* |                   | Seguridad Social** |                   |
|-------|-----------|-------------------|-------------------|--------------------|-------------------|
|       | Total     | Tutelas           | Part.en tutelas % | Tutelas            | Part.en tutelas % |
| 2011  | 405.359   | 48.883            | 12,06             | 19.061             | 4,70              |
| 2012  | 424.400   | 53.537            | 12,61             | 21.646             | 5,10              |
| 2013  | 454.500   | 50.073            | 11,02             | 20.709             | 4,56              |
| 2014  | 498.240   | 54.055            | 10,85             | 21.118             | 4,24              |
| TOTAL | 1.782.499 | 206.548           | 11,59             | 82.534             | 4,63              |

\* Incluye la tutela cuando se invocó el derecho a la Seguridad Social junto con otros derechos en la misma acción

\*\* Incluye la tutela cuando se invocó el derecho a la Seguridad Social y no se invocó el derecho a la salud en la misma acción

Fuente: Corte Constitucional

Cálculos: Defensoría del Pueblo

#### 3.5.1. Tutelas en seguridad social según departamento

De las 21.118 tutelas que invocaron el derecho a la seguridad social y no invocaron el derecho a la salud, el 20,26%, se originaron en la ciudad de Bogotá, seguido del departamento de Antioquia (15,34%), Valle del Cauca (14,49%), Santander (6,81%) y Atlántico (5,36%). Los incrementos porcentuales más altos con relación a 2013, se presentaron en Vichada, Casanare, Quindío, Córdoba y La Guajira; mientras que en Guaviare, Guainía, Amazonas, Boyacá y Chocó se presentaron las disminuciones más significativas (Tabla 68).

El número de municipios en donde se interpuso al menos una tutela que invocaba el derecho a la seguridad social en 2014 fue de 518, aumentando en 13 con relación a 2013 (Mapa 7 y 8.).

Tabla 68  
Tutelas de seguridad social según departamento  
Periodo 2013 – 2014

|                    | 2013       |         | 2014       |         | Variación % |
|--------------------|------------|---------|------------|---------|-------------|
|                    | N° Tutelas | Part. % | N° Tutelas | Part. % |             |
| Bogotá D.C         | 4.318      | 20,85   | 4.279      | 20,26   | -0,90       |
| Antioquia          | 3.561      | 17,20   | 3.239      | 15,34   | -9,04       |
| Valle              | 2.818      | 13,61   | 3.059      | 14,49   | 8,55        |
| Santander          | 1.364      | 6,59    | 1.438      | 6,81    | 5,43        |
| Atlántico          | 1.062      | 5,13    | 1.132      | 5,36    | 6,59        |
| Risaralda          | 855        | 4,13    | 948        | 4,49    | 10,88       |
| Norte de Santander | 697        | 3,37    | 737        | 3,49    | 5,74        |
| Bolívar            | 639        | 3,09    | 709        | 3,36    | 10,95       |
| Caldas             | 687        | 3,32    | 662        | 3,13    | -3,64       |
| Tolima             | 485        | 2,34    | 529        | 2,50    | 9,07        |
| Magdalena          | 480        | 2,32    | 453        | 2,15    | -5,63       |
| Meta               | 420        | 2,03    | 437        | 2,07    | 4,05        |
| Quindío            | 326        | 1,57    | 426        | 2,02    | 30,67       |
| Huila              | 388        | 1,87    | 406        | 1,92    | 4,64        |
| Cesar              | 365        | 1,76    | 373        | 1,77    | 2,19        |
| Cundinamarca       | 336        | 1,62    | 372        | 1,76    | 10,71       |
| Córdoba            | 274        | 1,32    | 313        | 1,48    | 14,23       |
| Cauca              | 315        | 1,52    | 308        | 1,46    | -2,22       |
| Boyacá             | 332        | 1,60    | 283        | 1,34    | -14,76      |
| Nariño             | 262        | 1,27    | 266        | 1,26    | 1,53        |
| Sucre              | 248        | 1,20    | 264        | 1,25    | 6,45        |
| La Guajira         | 113        | 0,55    | 129        | 0,61    | 14,16       |
| Chocó              | 95         | 0,46    | 82         | 0,39    | -13,68      |
| Caquetá            | 89         | 0,43    | 81         | 0,38    | -8,99       |
| Casanare           | 54         | 0,26    | 77         | 0,36    | 42,59       |
| Putumayo           | 37         | 0,18    | 38         | 0,18    | 2,70        |
| Arauca             | 30         | 0,14    | 28         | 0,13    | -6,67       |
| San Andrés         | 19         | 0,09    | 19         | 0,09    | 0,00        |
| Amazonas           | 20         | 0,10    | 16         | 0,08    | -20,00      |
| Vichada            | 1          | 0,00    | 7          | 0,03    | 600,00      |
| Guainia            | 8          | 0,04    | 5          | 0,02    | -37,50      |
| Vaupés             | 2          | 0,01    | 2          | 0,01    | 0,00        |
| Guaviare           | 9          | 0,04    | 1          | 0,00    | -88,89      |
| Total              | 20.709     | 100,00  | 21.118     | 100,00  | 1,97        |

Fuente: Corte Constitucional  
Cálculos: Defensoría del Pueblo

Mapa 7.  
Municipios con tutelas en seguridad social  
Periodo 2013

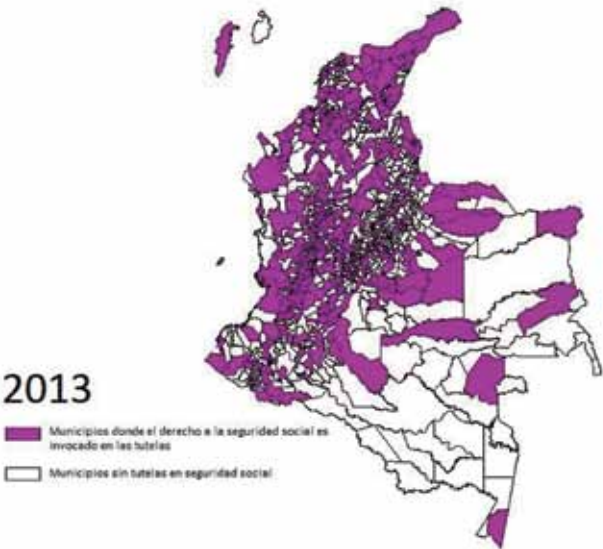

Mapa 8.  
Municipios con tutelas en seguridad social  
Periodo 2014

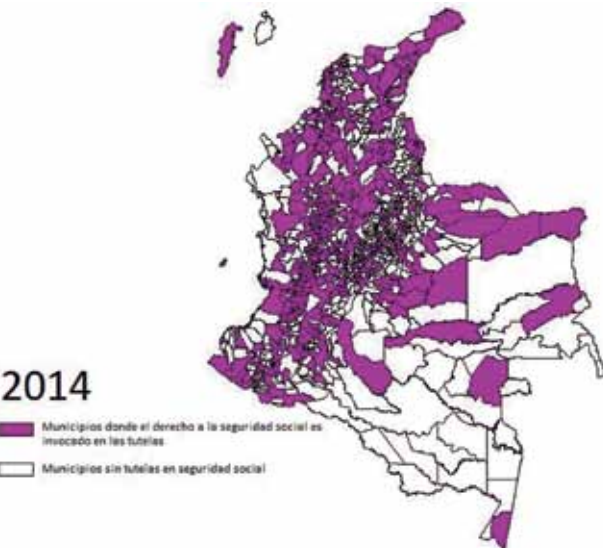

### 3.5.2. Despachos judiciales y decisión en primera instancia de las tutelas en seguridad social.

El porcentaje de favorecimiento en primera instancia a los ciudadanos que invocaron el derecho a la seguridad social en Colombia durante 2014 fue de 63,42%, porcentaje inferior en 3,27 puntos porcentuales al observado en 2013 (Tabla 69). Los indicadores de favorecimiento más altos se presentaron en los Juzgados de Menores (75%), Juzgados Promiscuos de Familia (70,37%) y Juzgados penales de adolescentes (69,68%). Los más bajos se observaron en la Corte Suprema de Justicia (8,57%), Consejo de Estado (21,05%) y Tribunales Superiores (31,77%).

Tabla 69  
Despachos Judiciales y decisión en primera Instancia  
Tutelas en seguridad social  
Periodo 2013 – 2014

|                                          | 2013          |         |                                   | 2014          |         |                                   |
|------------------------------------------|---------------|---------|-----------------------------------|---------------|---------|-----------------------------------|
|                                          | N° de Tutelas | Part. % | Concedidas en Primera Instancia % | N° de Tutelas | Part. % | Concedidas en Primera Instancia % |
| Juzgado de Menores                       | 63            | 0,30    | 69,84                             | 40            | 0,19    | 75,00                             |
| Juzgado Promiscuo de familia             | 213           | 1,03    | 75,59                             | 243           | 1,15    | 70,37                             |
| Juzgado Penal para adolescentes          | 957           | 4,62    | 70,32                             | 1.006         | 4,76    | 69,68                             |
| Juzgado Penal Municipal                  | 3.790         | 18,30   | 67,86                             | 3.901         | 18,47   | 69,37                             |
| Juzgado de Familia                       | 795           | 3,84    | 75,97                             | 777           | 3,68    | 68,73                             |
| Juzgado Civil Municipal                  | 3.799         | 18,34   | 70,25                             | 4.225         | 20,01   | 67,53                             |
| Juzgado familia del circuito             | 84            | 0,41    | 71,43                             | 95            | 0,45    | 67,37                             |
| Juzgado Penal del Circuito Especializado | 274           | 1,32    | 67,15                             | 248           | 1,17    | 67,34                             |
| Juzgado Promiscuo Municipal              | 1.249         | 6,03    | 66,45                             | 1.324         | 6,27    | 65,33                             |
| Juzgados Administrativos                 | 1.191         | 5,75    | 69,94                             | 1.493         | 7,07    | 64,23                             |
| Juzgado Civil del Circuito               | 1.996         | 9,64    | 68,34                             | 1.861         | 8,81    | 62,65                             |
| Juzgado Promiscuo del Circuito           | 98            | 0,47    | 71,43                             | 109           | 0,52    | 62,39                             |
| Juzgado Civil del Circuito Especializado | 100           | 0,48    | 66,00                             | 122           | 0,58    | 62,30                             |
| Juzgado de Ejecución de penas            | 501           | 2,42    | 73,65                             | 453           | 2,15    | 61,59                             |
| Juzgado Penal del Circuito               | 2.263         | 10,93   | 66,90                             | 2.083         | 9,86    | 61,40                             |
| Juzgado de pequeñas causa laboral        | 110           | 0,53    | 54,55                             | 153           | 0,72    | 60,13                             |
| Juzgado Laboral del Circuito             | 2.039         | 9,85    | 67,09                             | 1.754         | 8,31    | 59,86                             |
| Tribunal Administrativo                  | 344           | 1,66    | 32,85                             | 281           | 1,33    | 33,81                             |
| Consejo Seccional de la Judicatura       | 75            | 0,36    | 38,67                             | 75            | 0,36    | 33,33                             |
| Tribunal Superior                        | 544           | 2,63    | 36,03                             | 554           | 2,62    | 31,77                             |
| Consejo de Estado                        | 75            | 0,36    | 25,33                             | 76            | 0,36    | 21,05                             |
| Corte Suprema de Justicia                | 149           | 0,72    | 8,05                              | 245           | 1,16    | 8,57                              |
| Total                                    | 20.709        | 100,00  | 66,69                             | 21.118        | 100,00  | 63,42                             |

Fuente: Corte Constitucional  
Cálculos: Defensoría del Pueblo

Los juzgados que más tramitaron tutelas en seguridad social, fueron los Juzgados Civiles Municipales (20,01%), Juzgados Penales Municipales (18,47%) y Juzgados Penales del Circuito (9,86%).

### 3.5.3. El derecho a la seguridad social y su relación con otros derechos.

El derecho a la seguridad social es invocado en conjunto con otros derechos económicos sociales y culturales en el 39,09% de los casos, seguido del derecho de petición (15,75%), vida digna y dignidad humana (12,53%), y debido proceso y defensa (6,3%) como los más importantes (Tabla 70).

Tabla 70.  
El derecho a la seguridad social en asocio con otros derechos  
Periodo 2013 – 2014

|                                                  | 2013       |              | 2014       |              |
|--------------------------------------------------|------------|--------------|------------|--------------|
|                                                  | N° Tutelas | % en Tutelas | N° Tutelas | % en Tutelas |
| Seguridad Social                                 | 20.709     | 100,00       | 21.118     | 100,00       |
| Otros derechos económicos, sociales y culturales | 8.032      | 38,79        | 8.254      | 39,09        |
| Petición                                         | 4.871      | 23,52        | 3.327      | 15,75        |
| Vida digna y Dignidad humana                     | 2.242      | 10,83        | 2.647      | 12,53        |
| Debido proceso y defensa                         | 1.337      | 6,46         | 1.331      | 6,30         |
| Igualdad                                         | 1.214      | 5,86         | 1.096      | 5,19         |
| Vida                                             | 1.026      | 4,95         | 974        | 4,61         |
| Trabajo                                          | 864        | 4,17         | 908        | 4,30         |
| Integridad física                                | 136        | 0,66         | 127        | 0,60         |
| Protección al menor y mujer embarazada           | 92         | 0,44         | 74         | 0,35         |
| Personalidad jurídica                            | 56         | 0,27         | 52         | 0,25         |
| Intimidad, buen nombre y honra                   | 22         | 0,11         | 38         | 0,18         |
| Libertad de enseñanza, educación, investigación  | 36         | 0,17         | 28         | 0,13         |
| Libertad individual                              | 12         | 0,06         | 10         | 0,05         |
| Libre desarrollo de la personalidad              | 12         | 0,06         | 10         | 0,05         |
| Libertad de expresión e información              | 6          | 0,03         | 10         | 0,05         |
| Derechos colectivos y del medio ambiente         | 4          | 0,02         | 6          | 0,03         |
| Otros                                            | 15         | 0,07         | 28         | 0,13         |

|                                                |        |  |        |  |
|------------------------------------------------|--------|--|--------|--|
| Total tutelas de seguridad social interpuestas | 20.709 |  | 21.118 |  |
|------------------------------------------------|--------|--|--------|--|

Fuente: Corte Constitucional  
Cálculos: Defensoría del Pueblo

### 3.5.4. Entidades más demandadas en las tutelas que invocaron el derecho a la seguridad social.

A pesar de que el ISS/Colpensiones disminuyó el número de tutelas en 2,24%, continua en 2014 como la entidad con el mayor de número de acciones por violación a este derecho, seguido de las EPS Coomeva, SaludCoop y Salud Total, cuyas principales reclamaciones se presentaron por pagos de licencias de maternidad y pagos de incapacidad, a pesar de las reiteradas jurisprudencias expedidas por la Honorable Corte Constitucional (Tabla 71).

Tabla 71.  
Entidades más tuteladas en derecho a la seguridad social  
Periodo 2013 – 2014

|                                                                       | 2013       |         | 2014       |         | Variación % |
|-----------------------------------------------------------------------|------------|---------|------------|---------|-------------|
|                                                                       | N° Tutelas | Part. % | N° Tutelas | Part. % |             |
| Seguro Social Pensiones-Colpensiones                                  | 6.571      | 31,68   | 6.424      | 30,39   | -2,24       |
| Comeva                                                                | 1.687      | 8,13    | 1.777      | 8,41    | 5,33        |
| Saludcoop                                                             | 1.304      | 6,29    | 1.467      | 6,94    | 12,50       |
| Salud Total                                                           | 660        | 3,18    | 743        | 3,51    | 12,58       |
| Fondo de pensiones y cesantías Porvenir - Horizonte                   | 483        | 2,33    | 575        | 2,72    | 19,05       |
| Nueva EPS                                                             | 437        | 2,11    | 553        | 2,62    | 26,54       |
| Sura EPS                                                              | 538        | 2,59    | 552        | 2,61    | 2,60        |
| Unidad Administrativa Especial de Gestión Pensional y Parafiscal UGPP | 518        | 2,50    | 505        | 2,39    | -2,51       |
| Juzgados, Cortes, Tribunales                                          | 345        | 1,66    | 473        | 2,24    | 37,10       |
| Servicio Occidental de Salud S.O.S                                    | 360        | 1,74    | 473        | 2,24    | 31,39       |
| Alcaldías                                                             | 486        | 2,34    | 453        | 2,14    | -6,79       |
| Fondo de pensiones y cesantías Protección -ING                        | 304        | 1,47    | 425        | 2,01    | 39,80       |
| Ministerios                                                           | 398        | 1,92    | 382        | 1,81    | -4,02       |
| ARL Positiva                                                          | 275        | 1,33    | 299        | 1,41    | 8,73        |
| Fuerzas Militares y de policía                                        | 256        | 1,23    | 278        | 1,31    | 8,59        |
| Cafesalud                                                             | 210        | 1,01    | 226        | 1,07    | 7,62        |
| Famisanar                                                             | 176        | 0,85    | 211        | 1,00    | 19,89       |
| Unidad para la atención y reparación integral a las víctimas          | 243        | 1,17    | 206        | 0,97    | -15,23      |
| Gobernaciones                                                         | 194        | 0,94    | 203        | 0,96    | 4,64        |
| Caprecom                                                              | 185        | 0,89    | 193        | 0,91    | 4,32        |
| Colfondos-Citi                                                        | 183        | 0,88    | 187        | 0,88    | 2,19        |
| Sánitas                                                               | 154        | 0,74    | 184        | 0,87    | 19,48       |
| Empresas de servicios públicos - Telefonía celular                    | 124        | 0,60    | 164        | 0,78    | 32,26       |
| Secretarías de Educación                                              | 219        | 1,06    | 139        | 0,66    | -36,53      |
| Juntas de Calificación de Invalidez                                   | 129        | 0,62    | 135        | 0,64    | 4,65        |
| Comfenalco Valle                                                      | 146        | 0,70    | 125        | 0,59    | -14,38      |
| Compensar                                                             | 71         | 0,34    | 104        | 0,49    | 46,48       |
| Fiduprevisora                                                         | 102        | 0,49    | 102        | 0,48    | 0,00        |
| Bancos y Corporaciones                                                | 109        | 0,53    | 85         | 0,40    | -22,02      |
| Comfenalco Antioquia                                                  | 107        | 0,52    | 78         | 0,37    | -27,10      |
| Cajanal/Buen Futuro                                                   | 308        | 1,48    | 53         | 0,25    | -82,79      |
| Otros                                                                 | 3.462      | 16,69   | 3.368      | 15,93   | -2,72       |
| Total                                                                 | 20.744     | 100,00  | 21.142     | 100,00  | 1,92        |

Fuente: Corte Constitucional  
Cálculos: Defensoría del Pueblo

### 3.5.5. Tipo de entidad demandada.

El 40,05% de las tutelas que invocaron el derecho a la seguridad social se dirigieron contra las Administradoras de Fondos de Pensiones (AFP) (Tabla 72), no obstante haber disminuido estas en 2,31%.

Tabla 72.  
Tutelas en seguridad social según tipo de entidad demandada  
Periodo 2013 – 2014

|                                                             | 2013       |        | 2014       |        | Variación % |
|-------------------------------------------------------------|------------|--------|------------|--------|-------------|
|                                                             | N° Tutelas | Part.% | N° Tutelas | Part.% |             |
| Administradoras de Fondos de Pensiones                      | 8.667      | 41,78  | 8.467      | 40,05  | -2,31       |
| EPS solamente en Régimen Contributivo                       | 5.857      | 28,23  | 6.454      | 30,53  | 10,19       |
| Entidades particulares                                      | 1.299      | 6,26   | 1.486      | 7,03   | 14,40       |
| Otras Entidades del Estado                                  | 1.469      | 7,08   | 1.460      | 6,91   | -0,61       |
| Entes Territoriales                                         | 992        | 4,78   | 859        | 4,06   | -13,41      |
| Administradoras de Riesgos Laborales y Compañías de seguros | 660        | 3,18   | 738        | 3,49   | 11,82       |
| EPS solamente en Régimen subsidiado                         | 576        | 2,78   | 513        | 2,43   | -10,94      |
| Regímenes de excepción                                      | 292        | 1,41   | 310        | 1,47   | 6,16        |
| EPS en Régimen contributivo y subsidiado                    | 366        | 1,76   | 291        | 1,38   | -20,49      |
| Instituciones Prestadoras de Salud - IPS                    | 226        | 1,09   | 186        | 0,88   | -17,70      |
| Empresas de servicios Públicos - Telefonía celular          | 124        | 0,60   | 162        | 0,77   | 30,65       |
| Otros                                                       | 216        | 1,04   | 216        | 1,02   | 0,00        |
| Total                                                       | 20.744     | 100,00 | 21.142     | 100,00 | 1,92        |

Fuente: Corte Constitucional  
Cálculos: Defensoría del Pueblo

El ISS /Colpensiones fue la entidad más demandada con el 75,87% de las tutelas de este grupo. Sin embargo, como se ha mencionado, la mayoría de estas tutelas invocaron el derecho de petición, y una minoría invocaron el derecho a la seguridad social.

La segunda entidad en número de tutelas de este grupo correspondió al Fondo de pensiones y cesantías Porvenir – Horizonte, que tuvo un incremento de 19,05% con relación a 2013 (Tabla 73).

Tabla 73.  
Tutelas en seguridad social contra los Fondos de Pensiones  
Periodo 2013 – 2014

|                                                                       | 2013       |         | 2014       |         | Variación % |
|-----------------------------------------------------------------------|------------|---------|------------|---------|-------------|
|                                                                       | N° Tutelas | Part. % | N° Tutelas | Part. % |             |
| Seguro Social Pensiones-Colpensiones                                  | 6.571      | 75,82   | 6.424      | 75,87   | -2,24       |
| Fondo de pensiones y cesantías Porvenir - Horizonte                   | 483        | 5,57    | 575        | 6,79    | 19,05       |
| Unidad Administrativa Especial de Gestión Pensiones y Parafiscal UGPP | 516        | 5,95    | 505        | 5,96    | -2,13       |
| Fondo de pensiones y cesantías Protección -ING                        | 304        | 3,51    | 425        | 5,02    | 39,80       |
| Colfondos-Citi                                                        | 183        | 2,11    | 187        | 2,21    | 2,19        |
| Fiduprevisora                                                         | 102        | 1,18    | 102        | 1,20    | 0,00        |
| Fondo de Previsión del Magisterio                                     | 81         | 0,93    | 80         | 0,94    | -1,23       |
| Fondo de pensiones públicas FOPEP/FONCEP/<br>Fondos territoriales/    | 64         | 0,74    | 55         | 0,65    | -14,06      |
| Cajanal/Buen Futuro                                                   | 308        | 3,55    | 53         | 0,63    | -82,79      |
| Fondo de Previsión Social del Congreso                                | 12         | 0,14    | 25         | 0,30    | 108,33      |
| Consorcio Prosperar - Colombia Mayor                                  | 29         | 0,33    | 23         | 0,27    | -20,69      |
| Otros                                                                 | 14         | 0,16    | 13         | 0,15    | -7,14       |
| Total                                                                 | 8.667      | 100,00  | 8.467      | 100,00  | -2,31       |

Fuente: Corte Constitucional  
Cálculos: Defensoría del Pueblo

El segundo grupo con el mayor número de tutelas en seguridad social está conformado por las EPS que prestan servicios en el régimen Contributivo con el 30,53%, en el que las principales reclamaciones son por pago de licencias de maternidad e incapacidades médicas. Las EPS con más tutelas por estos conceptos fueron Coomeva, SaludCoop, Salud Total, Nueva EPS y Sura. Durante 2014 estas tutelas se incrementaron en 10,19% con relación a 2013. (Tabla 74)

Tabla 74  
Tutelas en seguridad social contra EPS  
Periodo 2013 – 2014

|                                    | 2013       |         | 2014       |         | Variación % |
|------------------------------------|------------|---------|------------|---------|-------------|
|                                    | N° Tutelas | Part. % | N° Tutelas | Part. % |             |
| Coomeva                            | 1.687      | 28,80   | 1.777      | 27,53   | 5,33        |
| Saludcoop                          | 1.304      | 22,26   | 1.467      | 22,73   | 12,50       |
| Salud Total                        | 660        | 11,27   | 743        | 11,51   | 12,58       |
| Nueva EPS                          | 437        | 7,46    | 553        | 8,57    | 26,54       |
| Sura EPS                           | 538        | 9,19    | 552        | 8,55    | 2,60        |
| Servicio Occidental de Salud S.O.S | 360        | 6,15    | 473        | 7,33    | 31,39       |
| Famisanar                          | 176        | 3,00    | 211        | 3,27    | 19,89       |
| Sánitas                            | 154        | 2,63    | 184        | 2,85    | 19,48       |
| Comfenalco Valle                   | 146        | 2,49    | 125        | 1,94    | -14,38      |
| Compensar                          | 71         | 1,21    | 104        | 1,61    | 46,48       |
| Cruz Blanca                        | 87         | 1,49    | 84         | 1,30    | -3,45       |
| Aliansalud                         | 90         | 1,54    | 80         | 1,24    | -11,11      |
| Comfenalco Antioquia               | 107        | 1,83    | 78         | 1,21    | -27,10      |
| Golden Group EPS                   | 32         | 0,55    | 21         | 0,33    | -34,38      |
| Salud Colpatria                    | 8          | 0,14    | 2          | 0,03    | -75,00      |
| Total                              | 5.857      | 100,00  | 6.454      | 100,00  | 10,19       |

Fuente: Corte Constitucional  
Cálculos: Defensoría del Pueblo

Otro grupo que incrementó el número de tutelas fue el conformado por las Administradoras de Riesgos laborales (ARL), en el que la ARL Positiva se constituyó como la entidad con el mayor número de acciones que invocaron el derecho a la seguridad social, con un acumulado de 40,51% de ellas y un incremento de su frecuencia en 8,73%. (Tabla 75).

Tabla 75.

Tutelas en seguridad social contra Administradoras de Riesgos Laborales y Compañías de Seguros  
Periodo 2013 – 2014

|                             | 2013       |         | 2014       |         | Variación % |
|-----------------------------|------------|---------|------------|---------|-------------|
|                             | Nº Tutelas | Part. % | Nº Tutelas | Part. % |             |
| ARL Positiva                | 275        | 41,67   | 299        | 40,51   | 8,73        |
| ARL Sura                    | 96         | 14,55   | 80         | 10,84   | -16,67      |
| Seguros de Vida Colpatria   | 48         | 7,27    | 66         | 8,94    | 37,50       |
| Compañía de Seguros Colmena | 61         | 9,24    | 62         | 8,40    | 1,64        |
| La Equidad Seguros de Vida  | 31         | 4,70    | 36         | 4,88    | 16,13       |
| Compañía de Seguros Bolívar | 42         | 6,36    | 33         | 4,47    | -21,43      |
| Seguros del Estado S.A      | 26         | 3,94    | 33         | 4,47    | 26,92       |
| Liberty Seguros             | 18         | 2,73    | 31         | 4,20    | 72,22       |
| Maphre Seguros              | 15         | 2,27    | 24         | 3,25    | 60,00       |
| La previsoría Seguros       | 8          | 1,21    | 18         | 2,44    | 125,00      |
| QBE Seguros                 | 9          | 1,36    | 15         | 2,03    | 66,67       |
| Seguros de Vida Alfa        | 12         | 1,82    | 14         | 1,90    | 16,67       |
| Allianz seguros             | 0          | 0,00    | 7          | 0,95    | -           |
| BBVA seguros                | 7          | 1,06    | 6          | 0,81    | -14,29      |
| Otras compañías de seguros  | 12         | 1,82    | 14         | 1,90    | 16,67       |
| Total                       | 660        | 100,00  | 738        | 100,00  | 11,82       |

Fuente: Corte Constitucional  
Cálculos: Defensoría del Pueblo

### 3.5.6. Contenidos más frecuentes en las tutelas de seguridad social.

El análisis de esta sección se hizo sobre una muestra representativa de 1.393 tutelas que invocaron el derecho a la seguridad social y no invocaron el derecho a la salud en 2014, seleccionada a través de un muestreo aleatorio estratificado por departamento con una confiabilidad del 95% y un error del 2,6%. Los resultados que se presentan, utilizaron un factor de expansión en función de la misma variable de estratificación.

La información fue registrada en el anexo 2. Se identificaron las solicitudes realizadas en cada expediente de acuerdo al relato del accionante en la tutela seleccionada. La cuantificación se hizo con todas las solicitudes en cada una de las tutelas, en razón de que en una misma acción se podía presentar más de una solicitud con requerimientos diferentes.

Igual que el año anterior, las solicitudes más frecuentes en las tutelas que invocaron el derecho a la seguridad social fueron el pago de incapacidades por parte de las EPS del régimen contributivo con el 16,99%, con un incremento de 13,68% con relación a 2013 (Tabla 75). En este sentido, es necesario recordar que la incapacidad originada por enfermedad general, debe ser pagada por la EPS a la que el trabajador esté afiliado.

Como segundas solicitudes más frecuentes estuvieron las reclamaciones por pago de las licencias de maternidad (14,59%), que crecieron en 24,6%, ocasionado en la mayoría de las veces, por la no aplicación de las distintas reglas jurisprudenciales por parte de las entidades de aseguramiento.

En tercer lugar, se ubicaron las solicitudes de pago de mesadas pensionales con el 9,71%. Sin embargo, estas presentaron una disminución del 31,65%, y en su lugar se incrementaron las tutelas por reliquidación pensional con ocasión, entre otros motivos, por la no aplicabilidad de la normas en cada caso en particular y por la no unificación de criterios al interior de la AFP Colpensiones, no obstante existir la Circular 054 de 2010 emitida por la Procuraduría General de la Nación.

Tabla 76.  
Contenidos más frecuentes en las tutelas de seguridad social  
Periodo 2013-2014

|                                        | 2013              |         | 2014              |         | Variación % |
|----------------------------------------|-------------------|---------|-------------------|---------|-------------|
|                                        | Nº de solicitudes | Part. % | Nº de solicitudes | Part. % |             |
| Pago de Incapacidades                  | 3.268             | 15,08   | 3.715             | 16,99   | 13,68       |
| Pago de licencias de maternidad        | 2.561             | 11,82   | 3.191             | 14,59   | 24,60       |
| Pago de mesadas pensionales            | 3.106             | 14,34   | 2.123             | 9,71    | -31,65      |
| Reconocimiento de pensión de vejez     | 2.439             | 11,26   | 1.951             | 8,92    | -20,01      |
| Reliquidación pensional                | 785               | 3,62    | 1.256             | 5,74    | 60,00       |
| Servicios médicos                      | 1.320             | 6,09    | 1.161             | 5,31    | -12,05      |
| Reintegro laboral                      | 818               | 3,78    | 1.021             | 4,67    | 24,82       |
| Reconocimiento de pensión de invalidez | 575               | 2,65    | 885               | 4,05    | 53,91       |
| Pensión de sobreviviente               | 956               | 4,41    | 880               | 4,02    | -7,95       |
| Traslado de régimen pensional          | 1.058             | 4,88    | 865               | 3,96    | -18,24      |
| Calificación de invalidez              | 518               | 2,39    | 572               | 2,62    | 10,42       |
| Indemnización sustitutiva              | 484               | 2,23    | 436               | 1,99    | -9,92       |
| Pago de otras prestaciones económicas  | 188               | 0,87    | 392               | 1,79    | 108,51      |
| Corrección historia laboral            | 194               | 0,90    | 385               | 1,76    | 98,45       |
| Pago de salarios                       | 638               | 2,94    | 370               | 1,69    | -42,01      |
| Pago de aportes a seguridad social     | 701               | 3,24    | 329               | 1,50    | -53,07      |
| Devoluciones de dinero                 | 107               | 0,49    | 300               | 1,37    | 180,37      |
| Ayuda humanitaria                      | 274               | 1,26    | 265               | 1,21    | -3,28       |
| Afiliación a Salud                     | 419               | 1,93    | 241               | 1,10    | -42,48      |
| Certificaciones                        | 199               | 0,92    | 202               | 0,92    | 1,51        |
| Otros                                  | 1.059             | 4,89    | 1.327             | 6,07    | 25,31       |
| Total                                  | 21.667            | 100,00  | 21.867            | 100,00  | 0,92        |

Fuente: Corte Constitucional  
Cálculos: Defensoría del Pueblo



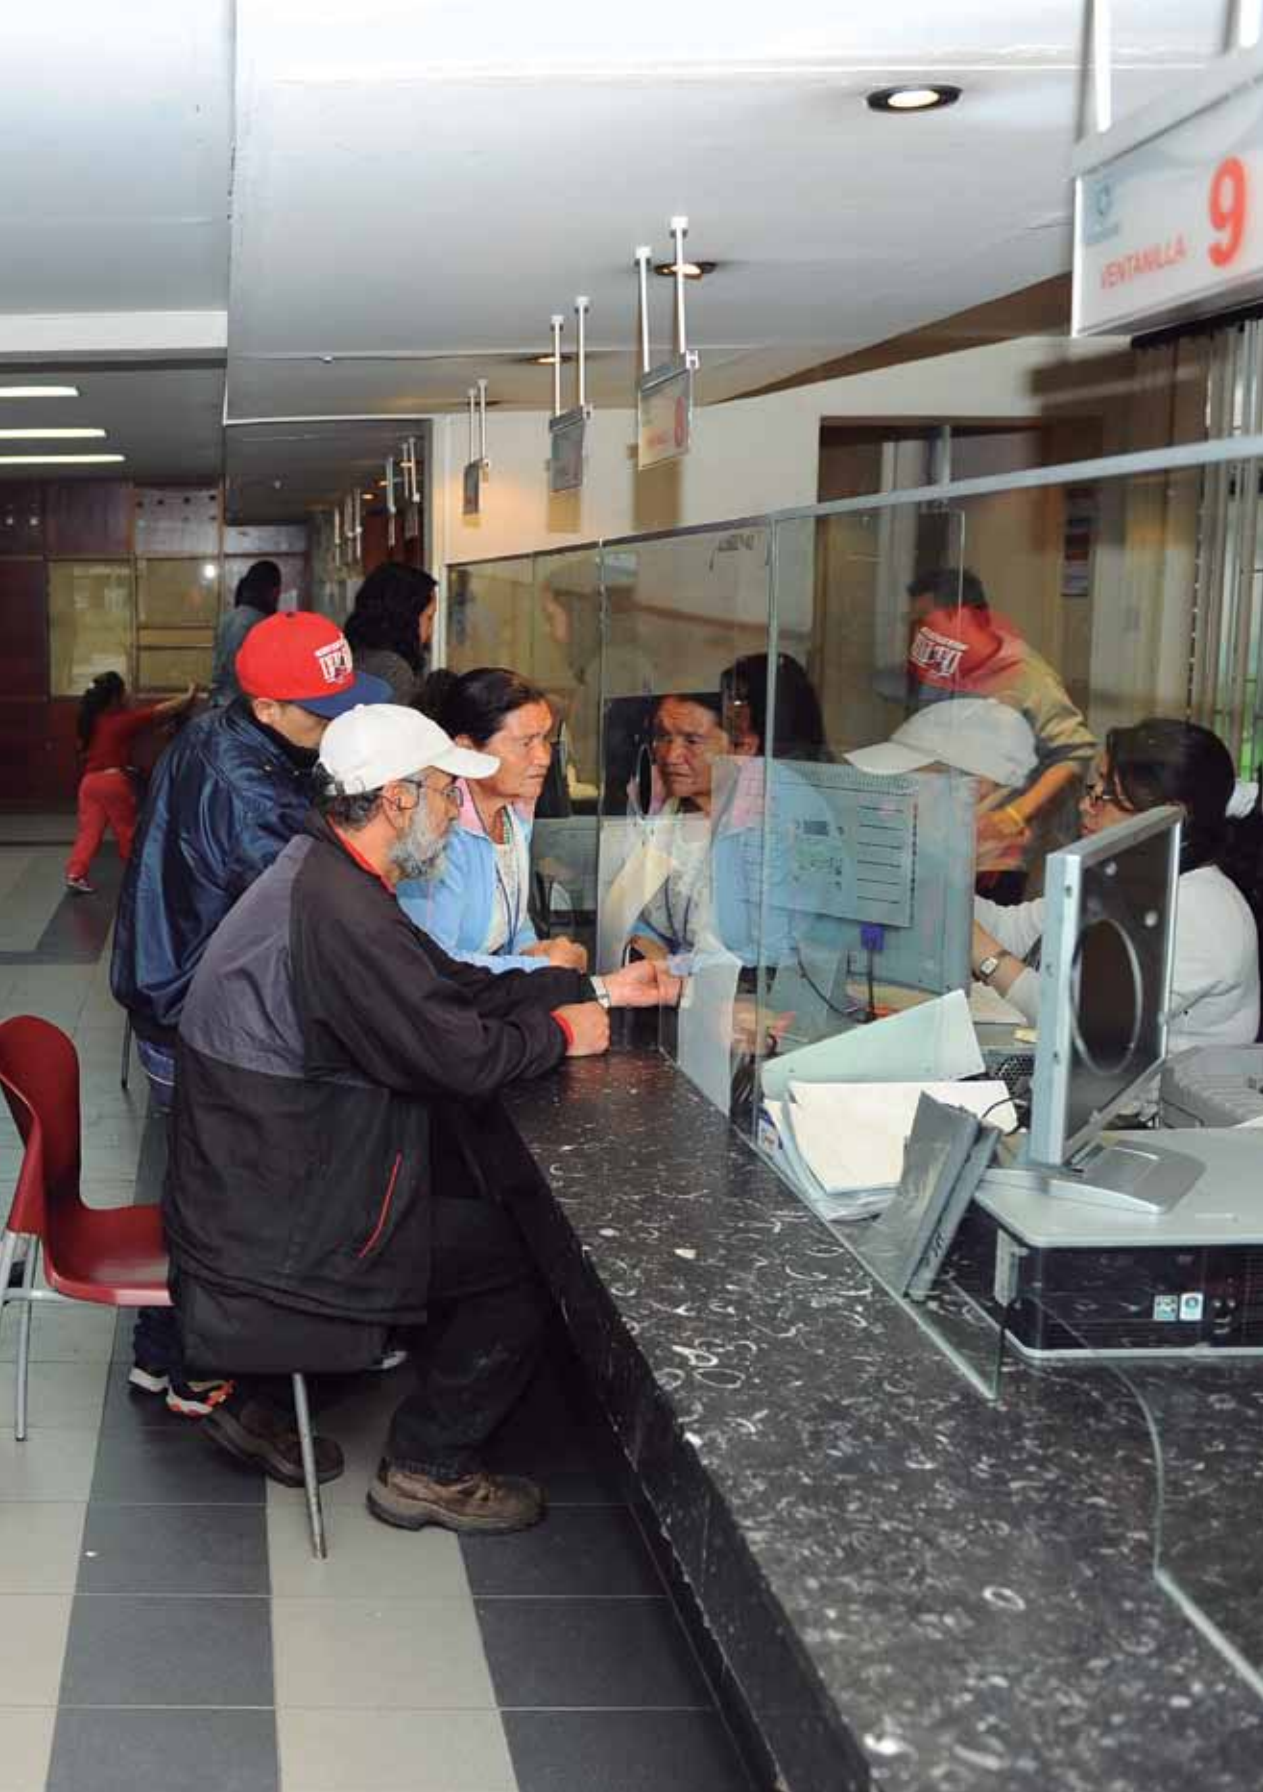

# CONCLUSIONES

## 1. Tutelas en general

La Acción de Tutela permanece como el mecanismo de amparo más utilizado por los colombianos para garantizar la protección de sus derechos fundamentales, principalmente utilizado por los grupos de especial protección constitucional (desplazados, víctimas, discapacitados, adultos mayores, etc.), que la interponen de manera constante buscando protección del Estado.

En el año 2014 se interpusieron 498.240 tutelas constituyéndose como el periodo con el mayor número de ellas desde que se implementó esta figura en la Constitución Política de 1991. Lo anterior implica que aproximadamente cada 63 segundos se interpone una acción, si se tiene en cuenta que los usuarios disponen de las 24 horas de los 365 días del año para presentarlas.

Según el indicador de tutelas, por cada 10.000 habitantes, en Colombia se interponen 105 acciones de Tutela, cifra superior en 8,38% con relación a lo observado en 2013. Este incremento es superior al crecimiento poblacional.

Teniendo en cuenta que en cada tutela se puede invocar más de un derecho, los cinco derechos más invocados en las tutelas fueron, en su orden: petición (51,88%), salud (23,74%), otros derechos económicos, sociales y culturales (16,05%), vida digna y dignidad humana (14,55%), y seguridad social (10,85%). De estos, el derecho de petición presenta el mayor crecimiento con el 18,22% con relación a 2013.

Los lugares donde se interpusieron el mayor número de tutelas fueron, en su orden: Antioquia (32,71%), Bogotá (16,68%), Valle del Cauca (8,12%), Santander (4,29%) y Tolima (3,33%). Según el indicador del número de tutelas por cada 10.000 habitantes, nueve (9) regiones presentan indicadores superiores al valor nacional (105 tutelas), a saber, Antioquia, Caquetá, Putumayo, Caldas, Meta, Risaralda, Tolima, Quindío y Bogotá.

Las entidades con más tutelas en Colombia fueron: la Unidad para la Atención y Reparación Integral a las Víctimas con 146.603 (29,41%), ISS /Colpensiones con 50.160 (10,06%) y los Juzgados, Cortes y Tribunales con 25.431 (5,10%).

En el 69,93% de los casos, los fallos de primera instancia favorecieron a los ciudadanos. Comfamiliar Nariño fue la entidad con el mayor número de fallos en contra, en primera instancia (95,8%).

## 2. Derecho a la salud.

En 2014, de las 498.200 tutelas interpuestas, 118.281 (23,74%) fueron para reclamar algún servicio de salud, constituyéndose como la cifra más alta desde la expedición de la Sentencia T-760 de 2008.

Cada 4 minutos se interpone en Colombia una tutela para reclamar servicios de salud.

Los lugares que concentran el mayor número de tutelas en salud fueron: Antioquia (20,49%), Valle del Cauca (11,44%), Bogotá (10,72%), Caldas (6,95%) y Santander (6,72%), acumulando el 56,32% de las acciones. En 874 municipios, se interpuso al menos una tutela que invocaba el derecho a la salud y en 506 de ellos, se constituyó como el derecho más invocado. El 83,16% de las decisiones judiciales en primera instancia fue fallado a favor de los tutelantes en salud.

Según el número absoluto de tutelas en salud, Nueva EPS (13.476), Coomeva (13.041), SaludCoop (12.374), Caprecom (10.397) y Cafesalud (5.285), se constituyeron como las entidades con mayor número de ellas, representando el 46%. Con relación al indicador “número de tutelas por cada 10.000 afiliados”, Golden Group (111,6), Nueva EPS (48,94), Coomeva (44,1), Servicio Occidental de Salud (33,89) y Caprecom (31,3) se constituyeron como las cinco (5) entidades que presentaron el indicador más alto.

Las tutelas que invocaron el derecho a la salud contra Instituciones Prestadoras de Salud –IPS-, disminuyeron en 13,03% respecto a 2013; las IPS más tuteladas fueron: Fundación Médico Preventiva (25,68%), Cosmitet (15,22%), Clínica General del Norte (4,58%), Emcosalud (3,37%) y UT Medicol (3,26%), instituciones que prestan sus servicios al magisterio.

Las tutelas contra el INPEC/penitenciarias para solicitar servicios de salud, disminuyeron en 2014 en 24,99%, especialmente en penitenciarias ubicadas en el Bogotá, Valle del Cauca, Tolima, Caldas y Santander, con ocasión a que las Acciones de Tutela se están interponiendo directamente contra Caprecom.

Las tutelas en los regímenes especiales (fuerzas militares y de policía y Ecopetrol) se incrementaron en un 28,14%, especialmente en los servicios de salud de las fuerzas militares, que alcanzaron una participación del 98,17%.

Dentro del grupo de las Administradoras de Riesgos Laborales, Positiva ARL es la entidad con el mayor número de tutelas en salud (47,96%). Respecto a las Administradoras de Fondos de Pensiones, ISS/Colpensiones obtuvo la mayor participación con 60,51%.

En promedio, en una misma tutela se encontraron 1,97 solicitudes, y son los exámenes paraclínicos los servicios con la media más alta (3,9).

Las solicitudes totales en salud aumentaron en 1,82% con relación a 2013. Las más frecuentes fueron: tratamientos (23,90%), medicamentos (16,11%), citas médicas especializadas (12,44%), prótesis, órtesis e insumos médicos (10,24%) y cirugías (9,55%).

De acuerdo con los contenidos, las solicitudes por prótesis, órtesis e insumos médicos, citas médicas y otros relacionados con salud (transporte, viáticos, alojamiento, etc.), tuvieron los incrementos más significativos.

Las tutelas para reclamar otros servicios relacionados con salud aumentaron en un 8,13% con relación a 2013, especialmente en transporte, viáticos, pago de incapacidades y licencias de maternidad.

Los cinco (5) diagnósticos más frecuentes en las tutelas fueron los tumores o neoplasias (10,95%), enfermedades del sistema circulatorio (9,23%), enfermedades del aparato genitourinario (8,43%), enfermedades del sistema nervioso (8,31%) y trastornos mentales y de comportamiento (8,22%).

Con relación a los tumores, los principales diagnósticos presentes en las tutelas son aquellos sujetos a acciones de prevención y promoción en los planes decenales de salud pública y cáncer tales como: cáncer de mama, de próstata, de cérvix y de piel.

El porcentaje de las solicitudes POS durante 2014 fue del 65,74% y es el régimen subsidiado el que presenta el mayor número de ellas (70,24%).

Teniendo en cuenta todas las solicitudes POS dentro de las tutelas (régimen contributivo y subsidiado), el porcentaje más alto corresponde a las citas médicas especializadas (97,19%), seguido de exámenes paraclínicos (89,47%), tratamientos (84,02%), imágenes diagnósticas (76,57%), cirugías (76,07%), procedimientos (50,64%), medicamentos (37,18%) y prótesis, órtesis e insumos médicos con el 10,32%.

## 2.1. Régimen Contributivo.

En este régimen, las solicitudes más frecuentes son los tratamientos, medicamentos y cirugías.

El 61,70% de las solicitudes contenidas en las tutelas se encontraba dentro del POS.

El 95,15% de las solicitudes por citas médicas especializadas estaba incluido en el POS. De estas, las citas más reclamadas por tutela durante el 2014 fueron ortopedia, neurología y urología.

El 85,70% de los exámenes paraclínicos estaba incluido en el POS. Los más solicitados fueron hemogramas, pruebas de coagulación y hormona estimulante de tiroides (TSH).

El 83,26% de los tratamientos se encontraba en el POS. Los tratamientos integrales que afectan el sistema circulatorio, neurológico y oncológico fueron los más frecuentes, seguidos de la solicitud de enfermera domiciliar y terapia física.

El 71,78% de las cirugías correspondió a solicitudes POS y los más solicitados fueron el reemplazo de rodilla, la cirugía bariátrica y la herniorrafia inguinal.

El 65,72% de las imágenes diagnósticas estaba incluido en el POS. Las más frecuentes fueron la resonancia nuclear magnética, el TAC abdominal y la endoscopia de vías digestivas altas.

El 31,87% de los procedimientos se encontraba en el POS. Los más solicitados fueron las biopsias, las litotripcias y el alisado radicular.

El 29,40% de los medicamentos estaba incluido en el POS. Los más frecuentes fueron la quetiapina, el oxígeno y la risperidona.

El 9,41% de las prótesis, órtesis e insumos médicos estaba incluido en el POS. Los más solicitados fueron diferentes insumos de kit de glucometría, kit de ostomía y CPAP.

En lo que respecta a lo No POS, las solicitudes más frecuentes fueron prótesis órtesis e insumos médicos (90,59%), seguido de medicamentos (70,60%), procedimientos (68,13%) e imágenes diagnósticas (34,28%), cirugías (28,22%), tratamientos (16,74%), exámenes paraclínicos (14,30%) y citas médicas (4,85%) .

Las prótesis, órtesis e insumos médicos No POS incluidos en las tutelas más solicitadas fueron los pañales desechables, las sillas de ruedas y los pañitos húmedos.

Los medicamentos No POS más solicitados fueron los complementos nutricionales, la pregabalina y la memantina.

Los procedimientos No POS más requeridos fueron las aplicaciones de medicamentos biológicos y procedimientos odontológicos.

Las imágenes diagnósticas No POS más demandadas fueron: TAC abdominal contrastado, resonancia nuclear magnética y ecocardiograma transesofágico.

Las cirugías No POS más solicitadas fueron las cirugías de mamoplastia de reducción, mastopexia y elevación del seno maxilar.

Los tratamientos No POS más pedidos fueron los tratamientos integrales (neuroológico y especializados en odontología), las terapias comportamentales ABA y la musicoterapia.

Los exámenes paraclínicos No POS más requeridos fueron BRCA 1 y 2 y, secuenciación completa gen phox 2b.

## 2.2. Régimen subsidiado

En este régimen, las solicitudes más frecuentes son los tratamientos con un 26,88%, seguido de medicamentos (19,09%), citas médicas especializadas (16,83%), prótesis, órtesis e insumos (13,40%), cirugías (8,98%), imágenes diagnósticas (8,10%), exámenes paraclínicos (5,60%) y procedimientos (1,13%).

El 70,24% de las solicitudes contenidas en las tutelas se encontraba dentro del POS.

Las solicitudes más frecuentes incluidas en el POS fueron citas médicas especializadas, exámenes paraclínicos y tratamientos.

El 98,80% de las solicitudes por citas médicas especializadas estaba incluido en el POS. Las citas más solicitadas por tutela durante el 2014 fueron neurología, ortopedia y urología.

El 93,34% de los exámenes paraclínicos estaba incluido en el POS, siendo los más solicitados: hemogramas, pruebas de coagulación y creatinina.

El 85% de los tratamientos se encontraba en el POS. Los más solicitados fueron tratamientos integrales oncológicos, tratamientos relacionados con trastornos mentales y con sistema circulatorio.

El 84,13% de las imágenes diagnósticas estaba incluido en el POS. Las más frecuentes fueron las endoscopias de vías digestivas altas, resonancias nucleares magnéticas cerebrales y electrocardiograma.

El 83,98% de los procedimientos estaba incluido en el POS. Entre los más frecuentes están las biopsias, la reprogramación de marcapasos y el alisado radicular.

El 83,14% de las cirugías estaba incluido en el POS. Entre las más frecuentes se encuentran la bariátrica, facoemulsificación + LIO y exodoncias.

El 46,14% de los medicamentos corresponde a solicitudes POS y los más frecuentes fueron el oxígeno, las insulinas y ASA.

El 11,25% de las prótesis, órtesis e insumos médicos estaba incluido en el POS. Entre los más solicitados se encuentran el kit de glucometría, kit de ostomía y material de osteosíntesis.

Las solicitudes No POS más frecuentes fueron: prótesis, órtesis e insumos (88,75%), seguido de medicamentos (53,86%), cirugías (16,86%), procedimientos (16,02%), imágenes diagnósticas (15,87%), tratamientos (15%), exámenes paraclínicos (6,66%) y citas médicas (1,20%).

Las prótesis, órtesis e insumos médicos No POS incluidos en las tutelas más solicitadas fueron los pañales desechables, sillas de ruedas y pañitos húmedos.

Los medicamentos No POS más solicitados fueron los suplementos alimenticios, cremas antiescaras y montelukast.

Las cirugías No POS más solicitadas fueron las abdominoplastia, mastopexia y mamoplastia de reducción.

Los procedimientos No POS más solicitados fueron los procedimientos odontológicos.

Las imágenes diagnósticas No POS más solicitadas fueron: TAC abdominal contrastado, nasofibrolaringoscopia y TAC reconstructivo 3D en cara.

Los tratamientos No POS más solicitados fueron los tratamientos integrales (trastorno mental, oncológico y circulatorio), las terapias educativas como la ABBA y la musicoterapia.

Los exámenes No POS más frecuentes en las tutelas fueron los anticuerpos orgánicos cuantitativos y herp parl.

### 3. Derecho a la seguridad social

El derecho a la seguridad social continua como el quinto derecho más invocado en las tutelas.

Las regiones que más invocaron este derecho fueron Bogotá (20,26%), Antioquia (15,34%), Valle del Cauca (14,49%), Santander (6,81%) y Atlántico con 5,36%.

La decisión en primera instancia fue favorable a los peticionarios en el 63,42% de los casos.

Las entidades más demandadas fueron el ISS/Colpensiones con el 30,39%, seguido de Coomeva (8,41%) y SaludCoop (6,94%).

El grupo conformado por las Administradoras de Fondos de Pensiones, concentra el 40,05% de las tutelas que invocan este derecho, seguido de las EPS del régimen contributivo con 30,53%.

Las solicitudes más frecuentes en las tutelas que invocaron el derecho a la seguridad social fueron por pago de incapacidades (16,99%), pago de licencias de maternidad (14,59%) y pago de mesadas pensionales (9,71%).

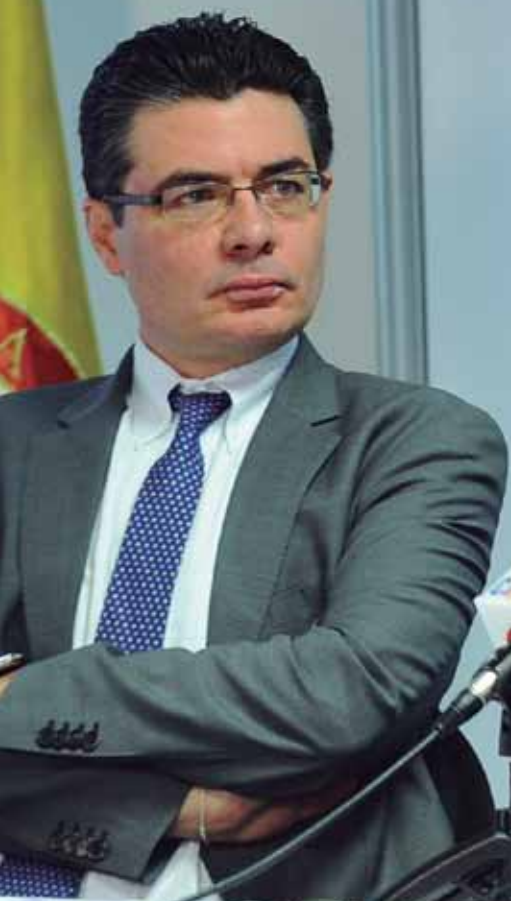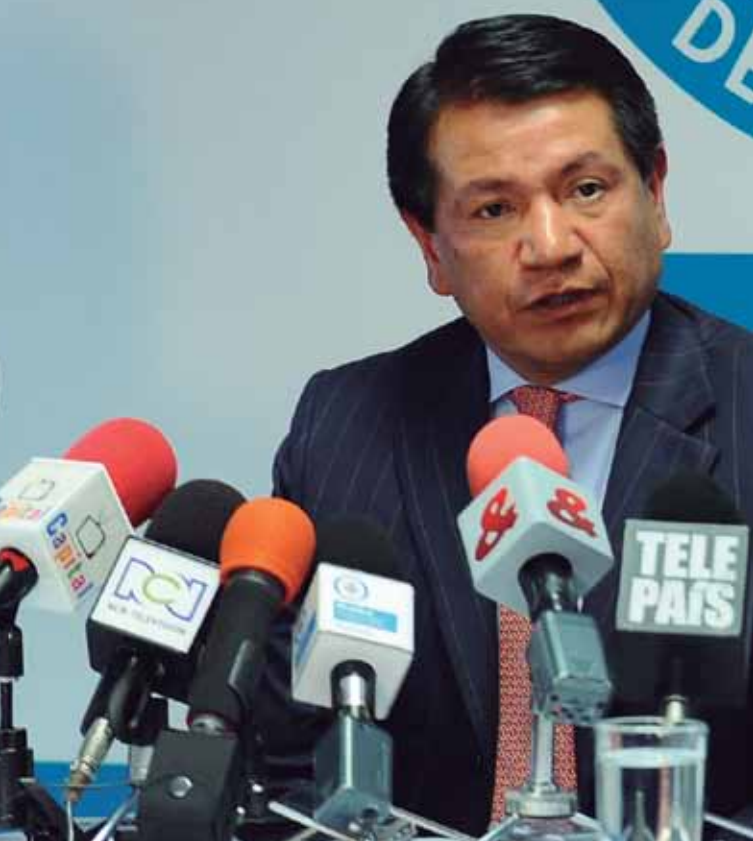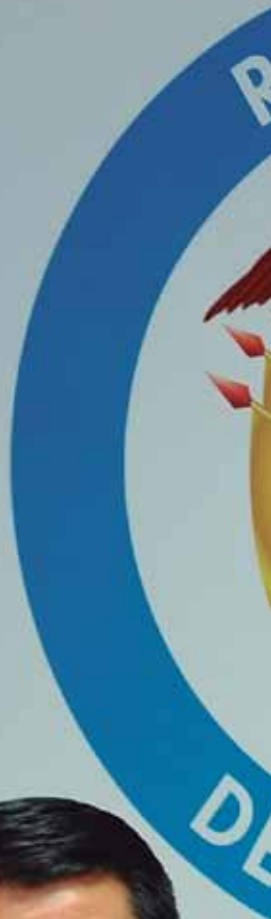

## RECOMENDACIONES

Instar a todas las autoridades competentes y demás actores involucrados para que den respuesta oportuna a los derechos de petición instaurados por los ciudadanos en cumplimiento del artículo 23 de la Constitución Política de Colombia, dado que el incumplimiento de este derecho fundamental está generando más de la mitad de las acciones de tutela.

Exhortar al Gobierno Nacional para que con base en los resultados encontrados en este estudio, adopte las medidas necesarias para subsanar las fallas que aquejan el Sistema General de Seguridad Social en Salud y garantice su goce efectivo.

Solicitar al Ministerio de Salud y Protección Social que explique las razones del aumento presentado en las acciones de tutela en salud, tal como se demuestra en el presente documento, tal como lo establece la orden 30 de la Sentencia T-760 de 2008, emanada de la Honorable Corte Constitucional.

Exhortar a los Jueces de la República para que en sus sentencias de tutela, establezcan en su decisión que si una tecnología en salud (medicamentos, procedimientos, tratamientos, etc.), se encuentra incluida en el POS, no se autorice el recobro de la misma, para lo cual le solicitará dicha verificación al FOSYGA.

Solicitar a los Jueces de la República, verificar el cumplimiento de las acciones de tutela en los términos establecidos y de los incidentes de desacato, interponiendo sanciones severas a las entidades infractoras.

Solicitar al Consejo Superior de la Judicatura, que según sus competencias, investigue a los jueces que no le hagan seguimiento a los fallos de tutela, ni a los incidentes de desacato.

Exhortar al Ministerio de Salud y Protección Social para que diseñe y ponga en práctica un modelo de atención en salud, con base en atención primaria, salud familiar y comunitaria, para fortalecer el papel de los médicos generales dentro del modelo de atención en salud.

Instar al Ministerio de Salud y Protección Social para que en el proceso de transición entre el POS actual y el plan de beneficios por inclusiones implícitas de que trata el artículo 15 de la Ley Estatutaria, no se menoscabe el acceso a las personas con enfermedades huérfanas o con patologías de frontera entre lo estético y lo funcional.

Reiterar al Ministerio de Salud y Protección Social para que de manera prioritaria presente los resultados de los estudios iniciados para la formación de especialistas, de acuerdo con las necesidades del país y desarrolle una política pública que garantice la oferta de especialistas en las distintas regiones.

Solicitar al Ministerio de Salud y Protección Social, para que armonice la jurisprudencia constitucional con las normas legales, especialmente decretos y resoluciones, de tal forma que haya unificación de criterios.

Reiterar al Ministerio de Salud y Protección Social, que en virtud de los principios de equidad y progresividad, fije más categorías de cuotas moderadoras y copagos, de manera proporcional a la capacidad de pago de los cotizantes, dada la barrera de acceso que estos gastos están ocasionando en los usuarios.

Instar nuevamente a la Superintendencia Nacional de Salud para que en uso de sus competencias, investigue y sancione a las EPS que nieguen servicios de salud, incluidos dentro del POS, en cumplimiento de la orden 19 de la Sentencia T-760 de 2008.

Solicitar a la Superintendencia Nacional de Salud que realice una audiencia pública cada seis (6) meses, en la que divulgue los resultados de las investigaciones y sanciones de las EPS que reiteradamente nieguen servicios de salud que se encuentran en el POS.

Insistir a la Superintendencia Nacional de Salud para que investigue a las IPS que nieguen servicios habilitados con el argumento del no pago por parte de las EPS.

Requerir a la Superintendencia Nacional de Salud y a las entidades territoriales con el fin de que hagan vigilancia especial a los servicios de urgencia de todas las IPS, en cumplimiento a lo establecido en el artículo 14 de la Ley Estatutaria en Salud.

Exigir a la Unidad para la Atención y Reparación Integral a las Víctimas que dé respuesta oportuna y de fondo a las solicitudes de la población desplazada y víctimas de la violencia, en las medidas de protección, asistencia, atención y reparación integral, así como las demás establecidas en la Ley 1448 de 2011, con ocasión al gran número de tutelas que se están generando.

Exhortar a las EPS para que fortalezcan las oficinas de atención al usuario con el fin de que sean altamente resolutivas con las peticiones, quejas y reclamos de los mismos. Igualmente, para que en uso de las competencias públicas delegadas, cumplan con su obligación legal y moral de garantizar de manera oportuna la prestación de los servicios contemplados en el plan de beneficios.

Solicitar a las EPS, implementar de manera inmediata los mecanismos necesarios para dar cumplimiento a la Ley 1751 de 2015 (Estatutaria en Salud), especialmente en lo relacionado con: goce efectivo del derecho fundamental a la salud, derechos y deberes de los usuarios, atención prioritaria a los sujetos de especial protección, participación en las decisiones del sistema de salud, redes de servicios, prohibición de la negación de servicios de urgencia, autonomía profesional y respeto a la dignidad de los profesionales y trabajadores de la salud.

Conminar a las EPS para que en cumplimiento de la jurisprudencia vigente, paguen con oportunidad las licencias de maternidad y las incapacidades.

Exigir a las IPS la prestación de los servicios de salud habilitados a los usuarios que lo requieran, sin pretextos de presuntos incumplimientos de pagos por parte de las EPS.

Insistir a las entidades encargadas de reglamentar la Ley 1709 de 2014 (modificaciones al Sistema Penitenciario y Carcelario), para que se desarrolle el modelo de atención en salud para la población privada de la libertad. Además, se adecuen, amplíen y construyan áreas sanitarias en los establecimientos de reclusión del orden nacional (ERON) a cargo del INPEC.



# ANEXOS

## Anexo 1

### Ficha de recolección de información de tutelas en salud

CONSECUTIVO\_\_\_\_\_

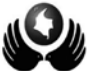

**DEFENSORÍA DEL PUEBLO**  
Derechos humanos, para vivir en paz

FICHA PARA RECOLECCIÓN DE INFORMACIÓN DE TUTELAS EN SALUD

|                                    |  |
|------------------------------------|--|
| 1. Expediente Número:              |  |
| 2. Ciudad:                         |  |
| 3. Departamento:                   |  |
| 4. Recibo en Corte Constitucional: |  |
| 5. Juez de Primera Instancia:      |  |
| 6. Juez de Segunda Instancia:      |  |
| 7. Demandante:                     |  |
| 8. Demandado:                      |  |
| 9. Derechos invocados:             |  |
| 10. Decisión en primera instancia: |  |
| 11. Decisión en segunda instancia: |  |

Régimen al que pertenece el demandante:\_\_\_\_\_

Edad\_\_\_\_\_

HECHOS

Diagnóstico:\_\_\_\_\_

Nombre de los exámenes\_\_\_\_\_

Nombre de los medicamentos\_\_\_\_\_

Nombre de las cirugías\_\_\_\_\_

Nombre de los tratamientos\_\_\_\_\_

Nombre de las prótesis, órtesis e insumos\_\_\_\_\_

Nombre de los procedimientos\_\_\_\_\_

Nombre de las citas médicas\_\_\_\_\_

Descripción de otras solicitudes\_\_\_\_\_

Resumen de fallo en primera instancia:\_\_\_\_\_

\_\_\_\_\_

\_\_\_\_\_

\_\_\_\_\_

Resumen de fallo en segunda instancia:\_\_\_\_\_

\_\_\_\_\_

\_\_\_\_\_

Observaciones\_\_\_\_\_

Magistrado:\_\_\_\_\_

Diligenciado por:\_\_\_\_\_ Fecha:\_\_\_\_\_

## Anexo 2

### Ficha de recolección de información de tutelas en seguridad social

CONSECUTIVO \_\_\_\_

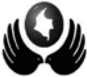

**DEFENSORÍA DEL PUEBLO**  
Derechos humanos, para vivir en paz

**FICHA PARA RECOLECCIÓN DE INFORMACIÓN DE TUTELAS EN  
SEGURIDAD SOCIAL**

|                                    |  |
|------------------------------------|--|
| 1. Expediente Número:              |  |
| 2. Ciudad:                         |  |
| 3. Departamento:                   |  |
| 4. Recibo en Corte Constitucional: |  |
| 5. Juez de Primera Instancia:      |  |
| 6. Juez de Segunda Instancia:      |  |
| 7. Demandante:                     |  |
| 8. Demandado:                      |  |
| 9. Derechos invocados:             |  |
| 10. Decisión en primera instancia: |  |
| 11. Decisión en segunda instancia: |  |

Régimen al que pertenece el demandante: \_\_\_\_\_

Edad \_\_\_\_\_

**HECHOS**

Diagnóstico: \_\_\_\_\_

Nombre de los exámenes \_\_\_\_\_

Nombre de imágenes diagnósticas \_\_\_\_\_

Nombre de los medicamentos \_\_\_\_\_

Nombre de las cirugías \_\_\_\_\_

Nombre de los tratamientos \_\_\_\_\_

Nombre de las prótesis, órtesis e insumos \_\_\_\_\_

Nombre de los procedimientos \_\_\_\_\_

Nombre de las citas médicas \_\_\_\_\_

**DESCRIPCIÓN DE OTRAS SOLICITUDES**

\_\_\_\_\_

\_\_\_\_\_

\_\_\_\_\_

\_\_\_\_\_

\_\_\_\_\_

\_\_\_\_\_

\_\_\_\_\_

Resumen de fallo en primera instancia: \_\_\_\_\_

\_\_\_\_\_

\_\_\_\_\_

\_\_\_\_\_

\_\_\_\_\_

Resumen de fallo en segunda instancia: \_\_\_\_\_

\_\_\_\_\_

\_\_\_\_\_

\_\_\_\_\_

15. Observaciones \_\_\_\_\_

Magistrado: \_\_\_\_\_

Diligenciado por: \_\_\_\_\_ Fecha: \_\_\_\_\_

Anexo 3

Tabla de Capítulos y Bloques de códigos de Diagnósticos

| Capítulo | Bloques de Códigos | DESCRIPCIÓN                                                                                                               |
|----------|--------------------|---------------------------------------------------------------------------------------------------------------------------|
| I        | A00 - B99          | ENFERMEDADES INFECCIOSAS Y PARASITARIAS                                                                                   |
| II       | C00 - D48          | TUMORES [NEOPLASIAS]                                                                                                      |
| III      | D50 - D89          | ENFERMEDADES DE LA SANGRE Y DE LOS ÓRGANOS HEMATOPOYÉTICOS, Y CIERTOS TRASTORNOS QUE AFECTAN EL MECANISMO DE LA INMUNIDAD |
| IV       | E00 - E90          | ENFERMEDADES ENDOCRINAS, NUTRICIONALES Y METABÓLICAS                                                                      |
| V        | F00 - F99          | TRASTORNOS MENTALES Y DEL COMPORTAMIENTO                                                                                  |
| VI       | G00 - G99          | ENFERMEDADES DEL SISTEMA NERVIOSO                                                                                         |
| VII      | H00 - H59          | ENFERMEDADES DEL OJO Y SUS ANEXOS                                                                                         |
| VIII     | H60 - H95          | ENFERMEDADES DEL OÍDO Y DE LA APÓFISIS MASTOIDES                                                                          |
| IX       | I00 - I99          | ENFERMEDADES DEL SISTEMA CIRCULATORIO                                                                                     |
| X        | J00 - J99          | ENFERMEDADES DEL SISTEMA RESPIRATORIO                                                                                     |
| XI       | K00 - K93          | ENFERMEDADES DEL SISTEMA DIGESTIVO                                                                                        |
| XII      | L00 - L99          | ENFERMEDADES DE LA PIEL Y DEL TEJIDO SUBCUTÁNEO                                                                           |
| XIII     | M00 - M99          | ENFERMEDADES DEL SISTEMA OSTEOMUSCULAR Y DEL TEJIDO CONJUNTIVO                                                            |
| XIV      | N00 - N99          | ENFERMEDADES DEL SISTEMA GENITOURINARIO                                                                                   |
| XV       | O00 - O99          | EMBARAZO, PARTO Y PUERPERIO                                                                                               |
| XVI      | P00 - P96          | CIERTAS AFECCIONES ORIGINADAS EN EL PERIODO PERINATAL                                                                     |
| XVII     | Q00 - Q99          | MALFORMACIONES CONGÉNITAS, DEFORMIDADES Y ANOMALÍAS CROMOSÓMICAS                                                          |
| XVIII    | R00 - R99          | SÍNTOMAS, SIGNOS Y HALLAZGOS ANORMALES CLÍNICOS Y DE LABORATORIO, NO CLASIFICADOS EN OTRA PARTE                           |
| XIX      | S00 - T98          | TRAUMATISMOS, ENVENENAMIENTOS Y ALGUNAS OTRAS CONSECUENCIAS DE CAUSAS EXTERNAS                                            |
| XX       | V01 - Y98          | CAUSAS EXTERNAS DE MORBILIDAD Y DE MORTALIDAD                                                                             |
| XXI      | Z00 - Z99          | FACTORES QUE INFLUYEN EN EL ESTADO DE SALUD Y CONTACTO CON LOS SERVICIOS DE SALUD                                         |
| XXII     | U00 - U99          | CÓDIGOS PARA SITUACIONES ESPECIALES                                                                                       |









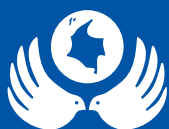

**Defensoría  
del Pueblo**  
C O L O M B I A

Calle 55 No. 10-32  
Tel. 57+1 314 4000  
57+1 314 7300  
Bogotá D.C., Colombia
