# Supplementary material
Source: publisher figshare collection journal article supplement (https://tandf.figshare.com/articles/dataset/_/10732607)
Supplement: Supplementary file 1 [file 2 › fjds_a_1690134_sm1285.pdf]

# LA TUTELA Y EL DERECHO A LA SALUD

PERÍODO 2006-2008

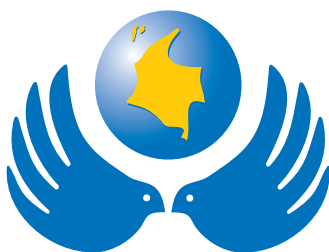

**DEFENSORÍA DEL PUEBLO**  
Derechos humanos, para vivir en paz

**Vólmar Antonio Pérez Ortiz**  
Defensor del Pueblo

**Gloria Elsa Ramírez Vanegas**  
Secretaria General

---

El presente texto se puede reproducir, fotocopiar o replicar,  
total o parcialmente, siempre que se cite la fuente.

## **Defensoría del Pueblo**

Calle 55 No. 10-32  
A.A. 24299 Bogotá, D. C.  
Tels. 3147300 – 3144000

ISBN 978-958-9353-98-1  
[www.defensoria.org.co](http://www.defensoria.org.co)  
Bogotá, D. C., 2009

# LA TUTELA Y EL DERECHO A LA SALUD

PERÍODO 2006-2008

EQUIPO INVESTIGATIVO DEL PROGRAMA DE SALUD  
Y SEGURIDAD SOCIAL DE LA DEFENSORÍA DEL PUEBLO

**MARTHA LUCÍA GUALTERO REYES**

Coordinadora del Programa de Salud

(Hasta mayo de 2009)

**ALEXANDRA ORJUELA GUERRERO**

Médica, especialista en salud familiar

**LYDA MARIANA GONZÁLEZ LIZARAZO**

Abogada, especialista en Derecho Público

**JAIRO ALBERTO BETANCOURT MALDONADO**

Economista, especialista en finanzas públicas

**HILARIO PARDO ARIZA**

Estadístico, abogado, magíster en ciencias financieras y sistemas

**EDWIN JULIÁN ANGULO HERRERA**

Digitador – recopilador de información

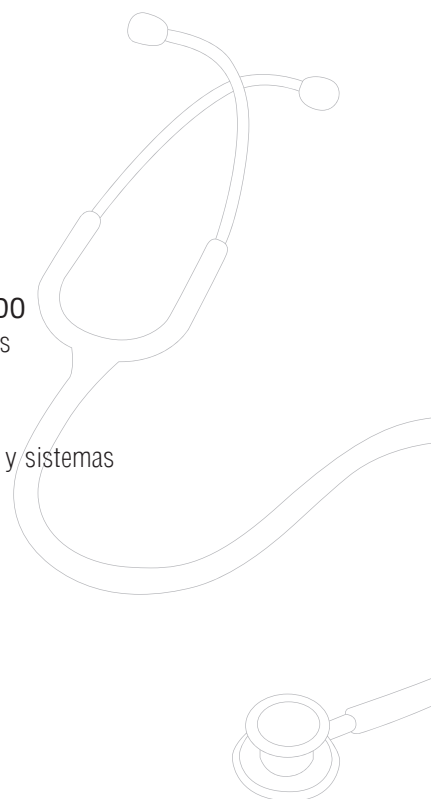



## CONTENIDO

|                                                                                                                   |    |
|-------------------------------------------------------------------------------------------------------------------|----|
| AGRADECIMIENTOS .....                                                                                             | 11 |
| INTRODUCCIÓN .....                                                                                                | 19 |
| 1. OBJETIVOS .....                                                                                                | 21 |
| 1.1. OBJETIVO GENERAL .....                                                                                       | 21 |
| 1.2. OBJETIVOS ESPECÍFICOS .....                                                                                  | 21 |
| 2. ASPECTOS METODOLÓGICOS .....                                                                                   | 23 |
| 2.1. CARACTERÍSTICAS DE LA MUESTRA .....                                                                          | 24 |
| 2.2. CAPACITACIÓN .....                                                                                           | 24 |
| 3. RESULTADOS .....                                                                                               | 25 |
| 3.1. LA TUTELA EN GENERAL .....                                                                                   | 25 |
| 3.1.1. LOS DERECHOS TUTELADOS .....                                                                               | 26 |
| 3.1.1.1. Tutelas por departamento .....                                                                           | 28 |
| 3.2. LA TUTELA Y EL DERECHO A LA SALUD .....                                                                      | 29 |
| 3.2.1. LA TUTELA EN SALUD DENTRO DEL<br>MARCO GENERAL DE LA TUTELA .....                                          | 29 |
| 3.2.1.1. Número de tutelas en salud por departamento .....                                                        | 31 |
| 3.2.1.2. Orientación de las decisiones en primera instancia .....                                                 | 35 |
| 3.2.1.3. Tutelas en salud tramitadas por juzgados .....                                                           | 36 |
| 3.2.1.4. El derecho a la salud como derecho fundamental y<br>su relación con otros derechos del mismo orden ..... | 37 |
| 3.2.1.5. Tipo de entidad demandada .....                                                                          | 38 |
| 3.2.1.5.1. Entidades que prestan servicios solamente<br>en el régimen contributivo .....                          | 40 |

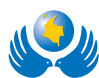

|              |                                                                                                   |    |
|--------------|---------------------------------------------------------------------------------------------------|----|
| 3.2.1.5.2.   | Entidades que prestan servicios conjuntamente en los regímenes contributivo y subsidiado. ....    | 43 |
| 3.2.1.5.3.   | Entidades que prestan servicios solamente en el régimen subsidiado. ....                          | 44 |
| 3.2.1.5.4.   | Entes territoriales. ....                                                                         | 47 |
| 3.2.1.5.5.   | Instituciones Prestadoras de Salud (IPS). ....                                                    | 47 |
| 3.2.1.5.6.   | Entidades del Estado. ....                                                                        | 49 |
| 3.2.1.5.7.   | Inpec/ Penitenciarías. ....                                                                       | 49 |
| 3.2.1.5.8.   | Regímenes de excepción. ....                                                                      | 52 |
| 3.2.1.5.9.   | Otras entidades. ....                                                                             | 52 |
| 3.2.2.       | ANÁLISIS DE LOS HECHOS DE LA TUTELA EN SALUD. ....                                                | 53 |
| 3.2.2.1.     | Contenidos más frecuentes en las tutelas interpuestas. ....                                       | 54 |
| 3.2.2.2.     | Tutelas para exigir contenidos del POS en los regímenes contributivo y subsidiado. ....           | 55 |
| 3.2.2.3.     | Desarrollo del contenido más frecuente de las tutelas interpuestas: ....                          | 57 |
| 3.2.2.3.1.   | Tutelas por cirugías. ....                                                                        | 57 |
| 3.2.2.3.1.1. | Tutelas por cirugías en los regímenes contributivo y subsidiado. ....                             | 59 |
| 3.2.2.3.2.   | Tutelas por medicamentos. ....                                                                    | 60 |
| 3.2.2.3.2.1. | Tutelas por medicamentos en los regímenes contributivo y subsidiado. ....                         | 62 |
| 3.2.2.3.3.   | Tutelas por exámenes paraclínicos. ....                                                           | 63 |
| 3.2.2.3.3.1. | Tutelas por exámenes paraclínicos (POS y no POS) en los regímenes contributivo y subsidiado. .... | 65 |
| 3.2.2.3.4.   | Tutelas por prótesis y órtesis. ....                                                              | 66 |
| 3.2.2.3.4.1. | Tutelas por prótesis y órtesis (POS y no POS) en los regímenes contributivo y subsidiado. ....    | 68 |
| 3.2.2.3.5.   | Tutelas por citas médicas. ....                                                                   | 69 |
| 3.2.2.3.5.1. | Tutelas por citas médicas (POS y no POS) en los regímenes contributivo y subsidiado. ....         | 71 |
| 3.2.2.3.6.   | Tutelas por tratamientos. ....                                                                    | 72 |
| 3.2.2.3.6.1. | Tutelas por tratamientos (POS y no POS) en los regímenes contributivo y subsidiado. ....          | 74 |

|              |                                                                                |    |
|--------------|--------------------------------------------------------------------------------|----|
| 3.2.2.3.7.   | Tutelas por procedimientos. ....                                               | 75 |
| 3.2.2.3.7.1. | Tutelas por procedimientos en los regímenes<br>contributivo y subsidiado. .... | 77 |
| 3.2.2.3.8.   | Tutelas por otras solicitudes relacionadas con el sistema. ....                | 78 |
| 3.2.2.3.9.   | Tutelas por otras solicitudes diferentes a salud. ....                         | 79 |
| 4.           | NEGACIÓN DE SERVICIOS POR PARTE DE LAS EPS .....                               | 81 |
| 5.           | CONCLUSIONES .....                                                             | 91 |
| 6.           | RECOMENDACIONES .....                                                          | 95 |
|              | ANEXOS .....                                                                   | 97 |

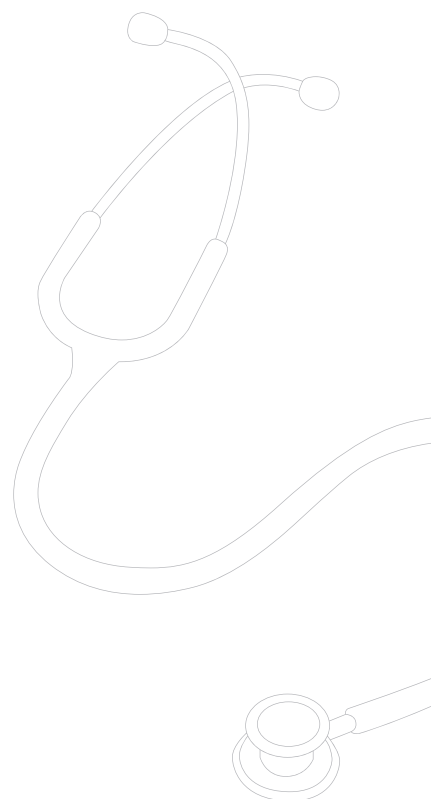



## ÍNDICE DE TABLAS, MAPAS Y GRÁFICAS

|              |                                                                                                                                               |    |
|--------------|-----------------------------------------------------------------------------------------------------------------------------------------------|----|
| Tabla N° 1.  | Registro de tutelas en Colombia. Período 1999-2008 .....                                                                                      | 25 |
| Tabla N° 2.  | Derechos invocados en las tutelas. Período 2006-2008 .....                                                                                    | 27 |
| Tabla N° 3.  | Número de tutelas, según departamento .....                                                                                                   | 28 |
| Tabla N° 4.  | Participación de las tutelas de salud período 1999-2008.....                                                                                  | 30 |
| Tabla N° 5.  | Tutelas en salud, según departamento .....                                                                                                    | 32 |
| Tabla N° 6.  | Número de tutelas en salud por cada 10.000 habitantes, según departamento.....                                                                | 34 |
| Tabla N° 7.  | Tutelas en salud tramitadas, según juzgado .....                                                                                              | 36 |
| Tabla N° 8.  | El derecho a la salud como derecho fundamental<br>y su relación con otros derechos. Período 2006-2008 .....                                   | 38 |
| Tabla N° 9.  | Tutelas en salud, según tipo de entidad demandada .....                                                                                       | 39 |
| Tabla N° 10. | Tutelas en entidades que prestan exclusivamente servicio en régimen contributivo.....                                                         | 41 |
| Tabla N° 11. | Número de tutelas por cada 10.000 afiliados .....                                                                                             | 42 |
| Tabla N° 12. | Tutelas en entidades que prestan servicio en los<br>regímenes contributivo y subsidiado simultáneamente.....                                  | 43 |
| Tabla N° 13. | Número de tutelas por cada 10.000 afiliados en entidades que prestan<br>servicio en regímenes contributivo y subsidiado simultáneamente ..... | 44 |
| Tabla N° 14. | Tutelas en entidades que prestan únicamente servicio en régimen subsidiado .....                                                              | 45 |
| Tabla N° 15. | Número de tutelas por cada 10.000 afiliados .....                                                                                             | 46 |
| Tabla N° 16. | Tutelas en salud contra entes territoriales.....                                                                                              | 47 |
| Tabla N° 17. | Tutelas contra clínicas, hospitales y otras IPS.....                                                                                          | 48 |
| Tabla N° 18. | Tutelas contra el Inpec, según penitenciarías .....                                                                                           | 50 |
| Tabla N° 19. | Tutelas contra el Inpec y penitenciarías según departamento período 2006-2008 .....                                                           | 51 |
| Tabla N° 20. | Tutelas en salud contra entidades con régimen especial.....                                                                                   | 52 |
| Tabla N° 21. | Tutelas en salud contra ARP y compañías de seguros.....                                                                                       | 53 |
| Tabla N° 22. | Contenido más frecuente en las tutelas interpuestas .....                                                                                     | 54 |
| Tabla N° 23. | Contenido de las tutelas (POS y NO POS) en los regímenes contributivo y subsidiado.....                                                       | 56 |
| Tabla N° 24. | Tutelas en salud según régimen período 2006-2008.....                                                                                         | 57 |
| Tabla N° 25. | Especialidades en las que se solicitan cirugías.....                                                                                          | 58 |
| Tabla N° 26. | Contenido de las tutelas por cirugías (POS y NO POS)<br>en regímenes contributivo y subsidiado .....                                          | 60 |
| Tabla N° 27. | Tutelas en cirugías según régimen - período 2006-2008.....                                                                                    | 60 |
| Tabla N° 28. | Especialidades en las que se solicitan medicamentos .....                                                                                     | 61 |
| Tabla N° 29. | Contenido de las tutelas por medicamentos (POS y NO POS)<br>en regímenes contributivo y subsidiado .....                                      | 62 |
| Tabla N° 30. | Tutelas en medicamentos según régimen - período 2006-2008.....                                                                                | 63 |
| Tabla N° 31. | Especialidades en las que se solicitan exámenes paraclínicos.....                                                                             | 64 |
| Tabla N° 32. | Contenido de las tutelas por exámenes (POS y NO POS)<br>en regímenes contributivo y subsidiado .....                                          | 66 |
| Tabla N° 33. | Tutelas en exámenes según régimen - período 2006-2008.....                                                                                    | 66 |
| Tabla N° 34. | Especialidades en las que se solicitan prótesis y órtesis .....                                                                               | 67 |

|                |                                                                                                                       |    |
|----------------|-----------------------------------------------------------------------------------------------------------------------|----|
| Tabla N° 35.   | Contenido de las tutelas por prótesis y órtesis (POS y NO POS) en régimen contributivo y subsidiado.....              | 68 |
| Tabla N° 36.   | Tutelas en prótesis y órtesis según régimen - período 2006-2008.....                                                  | 69 |
| Tabla N° 37.   | Citas solicitadas en las tutelas.....                                                                                 | 70 |
| Tabla N° 38.   | Contenido de las tutelas por citas médicas (POS y NO POS) en régimen contributivo y subsidiado.....                   | 71 |
| Tabla N° 39.   | Tutelas en citas médicas según régimen - período 2006-2008.....                                                       | 72 |
| Tabla N° 40.   | Especialidades en las que se solicitan tratamientos.....                                                              | 73 |
| Tabla N° 41.   | Contenido de las tutelas por tratamientos (POS y NO POS) en regímenes contributivo y subsidiado.....                  | 74 |
| Tabla N° 42.   | Tutelas en tratamientos según régimen - período 2006-2008.....                                                        | 75 |
| Tabla N° 43.   | Especialidades en las que se solicitan procedimientos.....                                                            | 76 |
| Tabla N° 44.   | Contenido de las tutelas por procedimientos (POS y NO POS) en regímenes contributivo y subsidiado.....                | 77 |
| Tabla N° 45.   | Tutelas en procedimientos según régimen - período 2006-2008.....                                                      | 78 |
| Tabla N° 46.   | Otras solicitudes relacionadas con el sistema.....                                                                    | 79 |
| Tabla N° 47.   | Otras solicitudes diferentes a salud.....                                                                             | 80 |
| Tabla N° 48.   | EPS que negaron servicios de salud en el régimen contributivo en el período octubre-diciembre de 2008.....            | 82 |
| Tabla N° 49.   | Motivos de negación de servicios en el régimen contributivo en el período octubre-diciembre de 2008.....              | 85 |
| Tabla N° 50.   | EPS que negaron servicios de salud en el régimen subsidiado en el período octubre-diciembre de 2008.....              | 86 |
| Tabla N° 51.   | Motivos de negación de servicios en el régimen subsidiado en el período octubre-diciembre de 2008.....                | 87 |
| Tabla N° 52.   | Motivos de negación de servicios en el régimen subsidiado sin primera causal - período octubre-diciembre de 2008..... | 88 |
| Mapa N° 1.     | Derecho más vulnerado en cada departamento.....                                                                       | 31 |
| Mapa N° 2.     | Tutelas por cada 10.000 habitantes.....                                                                               | 35 |
| Gráfica N° 1.  | Evolución de las tutelas período 1999-2008.....                                                                       | 30 |
| Gráfica N° 2.  | Número de tutelas por cada 10.000 afiliados en cada EPS.....                                                          | 40 |
| Gráfica N° 3.  | Contenido de las tutelas en salud.....                                                                                | 55 |
| Gráfica N° 4.  | Contenidos POS en las tutelas.....                                                                                    | 56 |
| Gráfica N° 5.  | Contenidos POS en cirugías.....                                                                                       | 59 |
| Gráfica N° 6.  | Contenidos POS en medicamentos.....                                                                                   | 62 |
| Gráfica N° 7.  | Contenidos POS en exámenes paraclínicos.....                                                                          | 65 |
| Gráfica N° 8.  | Contenidos POS en prótesis y órtesis.....                                                                             | 68 |
| Gráfica N° 9.  | Contenidos POS en citas médicas.....                                                                                  | 71 |
| Gráfica N° 10. | Contenidos POS en tratamientos.....                                                                                   | 74 |
| Gráfica N° 11. | Contenidos POS en procedimientos.....                                                                                 | 77 |



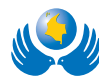

## AGRADECIMIENTOS

A los doctores Nilson Pinilla Pinilla y Rodrigo Escobar Gil, presidente y ex presidente de la Corte Constitucional; a la doctora Martha Victoria SÁCHICA, Secretaria General, y a los ingenieros Isaac Sáenz Cruz y Rubén Patarroyo Moreno, quienes facilitaron la base de datos sobre tutelas de la Corte Constitucional correspondiente a los años 2006-2008. Igualmente, a todos los jueces de la República y a sus colaboradores, que permitieron la inspección de los expedientes de tutela del año 2006 en sus respectivos juzgados.

A los personeros municipales, defensores regionales, defensores públicos, judicantes, estudiantes y demás personas que colaboraron en el diligenciamiento de los formatos de tutela en los distintos juzgados del país; al doctor Fernando Iriarte, en la corrección de estilo.

### AMAZONAS

Doctor Melqui Andrés Marín Elizalde. Defensor Regional Amazonas.

Doctora Estella Rosa Tirado Alvis. Ex defensora.

Fredy Fernando Chaparro Calderón

### ANTIOQUIA

Doctora Sandra María Rojas Manrique. Defensora Regional Antioquia.

Doctor Sergio Mazo, encargado de salud. Doctor Antonio Osorio, coordinador de defensores públicos.

Un especial agradecimiento a la Universidad de Medellín, al doctor Mauricio Bocanument, Director de Investigaciones, al doctor Juan Carlos Hoyos, Director de Consultorio Jurídico y a los siguientes estudiantes de último año de derecho: Manuel Ferley Patiño, Susana Alcaraz Montoya, Alejandro Calle Monsalva, Astrid Lorena Cano Mejía, Cristian Chala Sánchez, Gabriel Mauricio Escobar Restrepo, María Yanet García Rodríguez, Nataly Guerra Echavarría, Jeimie Vileidy Hernández Mesa, Leidy Yocira Murillo Hinestroza, Carlos Oquendo Valderrama, Maribel Osorio Mazo, Beatriz Restrepo Higueta, Yuliana Valdés Duque y Sandra Milena Zuluaga Cataño.

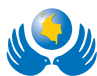

Igualmente, a los personeros de los siguientes municipios: Abejorral, Amagá, Apartadó, Caldas, Cauca, Cisneros, Ciudad Bolívar, Cocorná, Copacabana, El Peñón, Entreríos, Jericó, La Ceja, La Estrella, Marinilla, Rionegro, Sabaneta, Santa Bárbara, San Pedro de los Milagros, San Jerónimo, San Vicente, Santa Rosa de Osos, Sonsón y Yarumal.

## ARAUCA

Doctora Gloria Cúltiva Orjuela. Defensora Regional Arauca.

## ATLÁNTICO

Doctora Felisa María Salcedo Revollo. Defensora Regional Atlántico.

Personeros de los municipios de Sabanalarga y Soledad.

Doctores María Bastidas, Jaime Vélez, Hernando Morrón, María del Carmen Cid, Domingo Amarís, Betilda Tejeda, Leonor Guerrero y Jairo Blanco. Estudiantes Carlos Mario Avendaño y Yennifer Sobrino.

## BOGOTÁ

Doctor Rubén Darío Montoya Mejía. Defensor Regional Bogotá.

Doctores José Llain y Consuelo Herrera.

Amanda Morales Herrera, Sandra Milena Barrera, Leonardo Enrique Lara Ángel, Wilson Alexander Niño, Bibiana Gutiérrez, Anayibeth Cárdenas, Arturo Ramírez y Diana Carolina Martínez.

## BOLÍVAR

Doctor Antonio Padilla Oyaga. Defensor Regional Bolívar.

Doctora Gloria Riveros de Altamar, ex defensora.

Doctor Germán Cure Celis, Profesional encargado del área de salud.

Personeros de los municipios de San Jacinto y El Carmen de Bolívar.

Lelis Romero, Yuranis Cogollo Cepella, Ángela Daza Cueto, Heyzel Sarmiento Macayza, Polo González y Rafael Murillo.

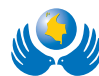

## BOYACÁ

Doctor Gustavo A. Toro Rodríguez (c). Defensor Regional Boyacá.

Doctor William Leonidas Hernández. Profesional encargado del área de salud.

Doctores Martha Cecilia González, Ricardo Aparicio Corredor, Fernando Marroquín, Fernando Medina Gómez, Hugo Osorio Muñoz, Esperanza Correales, Carmenza Sosa y Carmen Adriana Blanco, Alba Ulloa.

## CALDAS

Doctor Gustavo Restrepo Pérez. Defensor Regional Caldas.

Personeros de los municipios de Chinchiná, Manzanares, Riosucio y Salamina.

Carolina Zapata Jaramillo, María Carolina Henao, Natalia Gutiérrez Arcos, Natalia Guevara, Luz Patricia Patiño e Ivonne Rincón Acosta.

## CAQUETÁ

Doctor Álvaro Castelblanco Cardoso. Defensor Regional Caquetá.

Angélica Rocío Ángel.

## CASANARE

Doctor Mauricio Mojica Flórez. Defensor Regional Casanare.

Doctora Érika Romira Jaime. Profesional encargada del área de salud.

Personero del municipio de Villanueva.

## CAUCA

Doctor Víctor Javier Meléndez Guevara (c). Defensor Regional Cauca.

Personeros de los municipios de Caldonio y El Bordo.

Iván R. Mosquera, Gloria Ximena Mantilla, Ramiro López, Jorge Joaquín D., Yaqueline Barrios y Rodolfo Nelson López Daza.



## CESAR

Doctor Agustín Flórez Cuello. Defensor Regional Cesar.

Personero del municipio de Pueblo Bello.

Doctores Dignael Manzano y Rudy Mábery Jaime.

## CÓRDOBA

Doctora Julia del Carmen Rodríguez Guerra (c). Defensora Regional Córdoba.

Doctora Lilian Rodríguez, asesora de gestión; doctor Álvaro Enrique Sánchez y doctor Luis Arturo Márquez Tamayo, director del consultorio jurídico de la Universidad del Sinú.

Personeros de los municipios de Cereté, Chinú, Planeta Rica y Tierra alta.

Gary A. García Brunal, Irina Bolemo Garrido, Darlín Estrella Castilla y María Elvira Domar.

## CUNDINAMARCA

Doctor Luis Mauricio Vesga Carreño (c). Defensor Regional Cundinamarca.

Personeros de los municipios de Chía, Girardot, Gutiérrez, La Mesa y Tocancipá.

## CHOCÓ

Doctor Víctor Raúl Mosquera García. Defensor Regional Chocó.

Personeros de los municipios de Nuquí y Bahía Solano.

Luis Germán García y Ketty Hurtado.

## GUAINÍA

Doctor Henry Armando Mayorga López. Defensor Regional Guainía.

Doctor Luis Fernando Cepeda Barreto.



## LA GUAJIRA

Doctor Fernando A. López Suárez. Defensor Regional La Guajira.

Personero de los municipios de Fonseca y San Juan del Cesar.

Limbano Díaz Pimineot, Juan Barros F. y Alcides Toro.

## GUAVIARE

Doctor Héctor Enrique López Puin. Defensor Regional Guaviare.

Carlos Moyano Romero.

## HUILA

Doctora Constanza Dorian Arias Perdomo. Defensora Regional Huila.

Personero del municipio de Pitalito.

Germán Yesid Castillo, César Iván Lozano, Diego Javier Fernández Naranjo, Wálter Franco Perdomo, Javier Salazar, Diego Andrés Amaya, Óscar Leonardo Polanía Sánchez, Fernando Barreto Rivera, Juan Pablo Quintero Murcia y Anselmo Suárez Rojas.

## MAGDALENA

Doctora Licet Peñaranda Peña. Defensora Regional Magdalena.

Personeros de los municipios de Fundación y Nueva Granada.

Doctores Vicente Noguera Linero, asesor de gestión; Javier de Jesús Reales Alvarado y César Augusto Carrillo Martínez.

## MAGDALENA MEDIO

Doctor Marco A. García Hernández. Defensora Regional Magdalena Medio.

Doctora Ivonne Lilian Rincón.



## META

Doctor Eduardo González Pardo. Defensor Regional Meta.

Personero del municipio de Granada.

Doctores Sandra Lucía Sánchez Pulecio, Cindy Vanegas, Juan Carlos Solano, Arsenio Monroy Benítez, Juan Carlos Guevara Garay, Rodrigo Florán, Edilma Bayona, Marisol Barajas, Pablo Hernando Hernández, Gustavo Hernando La Rotta Rincón, Liliana Solano, Fernando Medina Romero y Ricardo Martínez.

## NARIÑO

Doctor Álvaro Raúl Vallejos Yela. Defensor Regional Nariño.

Doctor Servio Tulio Caicedo Calderón. Coordinador administrativo y de gestión.

Doctores Armando Benavides Cárdenas, Nazareno Gustin, Giovanny Ledezma, Jairo Esteban Ponce Torres y Rubio Alberto Cerón.

Personeros de los municipios de La Unión e Ipiales,

Doctores Jorge E. Navas, Mario Fernando Chaves, Gonzalo Rafael Guerrero, Lenin Castro Acevedo, Mario René Meneses Paredes, Rubio Alberto Terón Muñoz y Jairo Ponce Torres.

## NORTE DE SANTANDER

Doctora Carmen Ligia Galvis García. Defensora Regional Norte de Santander.

Personero del municipio de El Carmen.

Luis Eduardo Rangel, Yajara Tarazona, Pedro Julio Moros, Yadira Gracia Silva y Erika Dayana Angarita.

## PUTUMAYO

Doctor Carlos Enrique Martínez Briceño. Defensor Regional Putumayo.

River Ordóñez Muñoz.

## QUINDÍO

Doctora Piedad Correal Rubiano. Defensora Regional Quindío.



José Patrocinio Vargas, Jaime Andrés Salazar Ramírez, Magda Lorena Giraldo Parra, Nathalie Arenas Flórez, Gina Marcela Gómez Cuéllar, Shaila Numaly Acosta Rodríguez, Mónica Marcela Quijano y Gloria Milena Posada Scarpetta.

## RISARALDA

Doctor Luis Carlos Leal Vélez. Defensor Regional Risaralda.

Personeros de los municipios de Dosquebradas, La Virginia, Quinchía y Santa Rosa de Cabal.

Paula Jimena Mejía, Daniela Durán Ospina, Angélica María Sepúlveda G. y Ángela María Arango Ospina.

## SANTANDER

Doctor Dilmar Ortiz Joya. Defensor Regional Santander.

Doctora Ana Felicia Barajas. Ex defensora.

Personero del municipio de San Gil.

Mónica Patricia Zambrano, Ángela María Peluha, Pedro Trujillo Ochoa, Andrea Carolina Villarreal y Víctor Hugo Álvarez.

## SAN ANDRÉS

Doctor Fidel Antonio Corpus Suárez. Defensor Regional San Andrés.

## SUCRE

Doctor Óscar Herrera Revollo. Defensor Regional Sucre.

Personero del municipio de Guaranda.

## TOLIMA

Doctor Santiago Ramírez Calderón. Defensor Regional Tolima.

Personeros de los municipios de Fresno y Chaparral.

Gina Milena Hernández, Vivian Ortíz y Óscar Bastidas.



## URABÁ

Doctora Nora Elena Lalinde Ángel. Defensora Regional Urabá.

## VALLE DEL CAUCA

Doctor Andrés Santamaría Garrido. Defensor Regional Valle.

Personeros de los municipios de Yumbo, Tulúa, Sevilla, Pradera, Palmira, Jamundí, Cartago y Zarzal.

Yenny Quiñones, Sandra Lorena Pacheco, Giovanni Alberto García, Gloria Esmeralda Monsalve Soto, Jéniffer Londoño Herreño, Yesid Acuña, Isnardy Yurley Vallejo, Yamileth Ramírez, Adila Arias Solarte, Fabián A. Pérez, Fredy López González, Maritza Elizabeth Simbala Patiño, Ambar Johaira Burbano, Maura Sofía Murillo Angón, Leidy Johana Burbano, Luz Helena Guerrero Ortega, Carlos Augusto Rojas, Leonardo Delgado López, José Darío Cerón Silva, Antonio Jaramillo, José Salamanca Paz, Carlos Lozano, Octavio Andrés Correa, Luis Alberto Bacca, Irene Segura, Deicy Cancimorse, Katherine Mejía López, Dayana Gavilanes, Carlos Cortés Riascos, Héctor Paredes, Katherine Soto Quintero, Fabio Melo Botero, Claudia Salas Martínez, Carlos Felipe Ávila, Ximena Quiñones Rodríguez, Silvio Patiño, Kelly Johanna Rentería, Danna Quiñones, Gustavo Parra, Jaime Losada, Yaneth Vivas Fuentes, Tatiana V. Rodríguez, Nina Jhoana Soto Bustamante, Paola Tejada, Dagoberto Solís Solarte y Javier Antonio Ruiz.

## VAUPÉS

Doctor Henry Fernando Luna Monroy. Defensor Regional Vaupés.

## VICHADA

Doctora Nancy Salamanca Fernández. Defensora Regional Vichada.

Henry A. Velandia R.

## INTRODUCCIÓN

El presente estudio es la tercera entrega que desde el año 2005 hace la Defensoría del Pueblo sobre el análisis de las tutelas que interponen los colombianos para reclamar sus derechos, especialmente en cuanto a las vulneraciones del derecho a la salud. Esta actualización corresponde al período 2006-2008 y complementa las cifras que desde el año 1999 viene registrando la entidad.

Los incrementos significativos en el número de tutelas que año tras año interponen los ciudadanos son una muestra elocuente de la confianza que se tiene en este mecanismo de protección. La tutela es vista como el medio más eficaz y expedito para hacer valer los derechos fundamentales y no en vano la colocaron los constituyentes en la Carta Magna.

En lo que respecta al derecho a la salud, las cifras continúan demostrando que miles de colombianos siguen acudiendo a este medio para reclamar sus derechos. Las continuas vulneraciones por las distintas entidades intervinientes en el aseguramiento, en la prestación de los servicios, en la responsabilidad en la atención de la población pobre no asegurada y otras especiales, así como el mayor conocimiento por parte de los usuarios de los derechos que tienen en materia de salud llevan al ejercicio de las alternativas legales para lograr su protección. Por tal motivo, la Corte Constitucional, después de hacer un análisis de estas continuas violaciones y de la múltiple jurisprudencia a lo largo de varios años, expidió la sentencia T-760 de 2008 para intentar disminuir las inequidades que se presentan en el sistema de salud y así propender a una verdadera reforma de este, de tal manera que los ciudadanos no tengan que recurrir a la acción de tutela para poder acceder a los servicios de salud.

Al concluir este estudio, han transcurrido cuatro meses desde la expedición de la sentencia T-760 de 2008 y ello no se ve reflejado en las cifras analizadas. La disminución del número de tutelas no es evidente y aunque los Comités Técnicos Científicos –CTC– están funcionando de acuerdo con lo establecido en las normas legales, la tendencia a la baja no se aprecia, por lo que hay que esperar un período más largo para observar sus efectos. No obstante, este estudio presenta el primer informe de seguimiento realizado por esta entidad a la orden décima novena respecto de negaciones de las EPS durante el último trimestre del año 2008, ya que estas negaciones pueden convertirse en tutelas.

La Defensoría del Pueblo espera que en su próximo informe las tutelas hayan disminuido como consecuencia del cumplimiento de la sentencia T-760 de 2008 por parte de todos

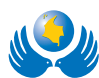

los entes involucrados en esta y como resultado de políticas del Gobierno acordes con las necesidades del país.

Igualmente, espera que las conclusiones y recomendaciones de este documento sirvan como soporte técnico en la adopción del nuevo Plan Obligatorio de Salud, que deberá corresponder a las necesidades actuales de los usuarios, sin menoscabar los recursos del sistema.

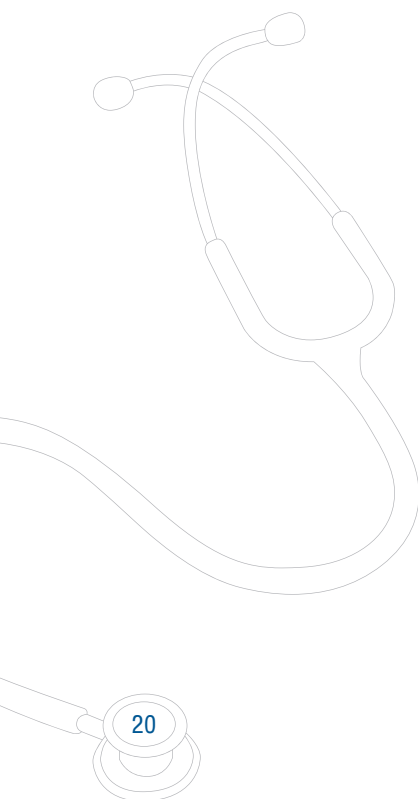

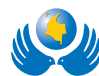

## 1. OBJETIVOS

### 1.1. OBJETIVO GENERAL

Verificar el grado de avance o retroceso de las violaciones al derecho a la salud, medido a través de la cuantificación de las tutelas instauradas por los usuarios para solicitar servicios de salud en el período 2006-2008.

### 1.2. OBJETIVOS ESPECÍFICOS

- Establecer la tendencia numérica de las tutelas instauradas en los últimos tres años.
- Determinar los derechos que más se invocan en las tutelas.
- Identificar los departamentos de origen de las tutelas.
- Cuantificar la participación del derecho a la salud en el conjunto de tutelas.
- Precisar la orientación judicial en primera instancia de las tutelas en salud.
- Identificar las entidades más tuteladas.
- Señalar el contenido más frecuente de las tutelas en salud.
- Establecer los contenidos del POS incluidos en las tutelas.

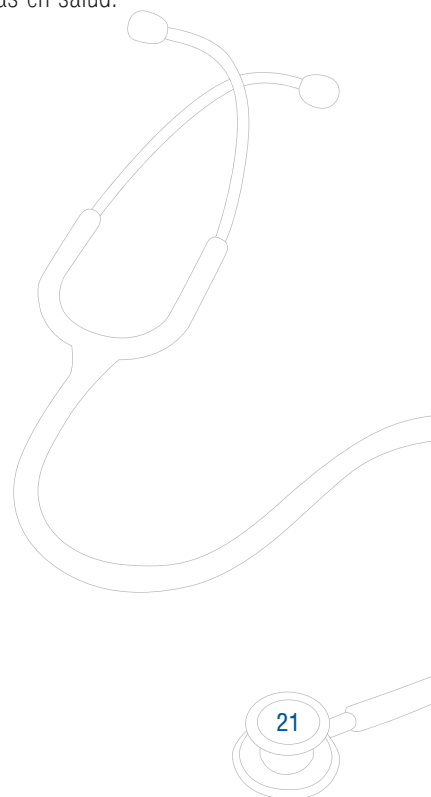



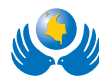

## 2. ASPECTOS METODOLÓGICOS

Para la actualización de las cifras del presente trabajo se tuvo como fuente primaria la base de datos de todas las tutelas que se tramitan en el país y que por obligación normativa reposan en la Corte Constitucional. Desde hace tres años y con una periodicidad mensual, dicha base es suministrada por la Corte a la Defensoría del Pueblo.

Una primera fase del estudio comprendió el análisis descriptivo de todas las tutelas interpuestas, en el que se determinan tendencias en el tiempo, derechos invocados y lugares de origen de las tutelas.

En una segunda etapa, este análisis se centró exclusivamente en aquellas tutelas que invocan el derecho a la salud, involucrando, además de las variables anteriores, aspectos relacionados con la orientación de las decisiones de los jueces y entidades demandadas.

En una fase final, se hizo un análisis pormenorizado de los hechos que llevaron a los ciudadanos a interponer tutelas que invocaron el derecho a la salud, determinando las solicitudes más frecuentes y clasificándolas si estaban o no dentro del Plan Obligatorio de Salud (POS), bien sea en el régimen contributivo o subsidiado. Dicho análisis fue realizado sobre una muestra representativa de 6.164 tutelas, seleccionadas a través del método de muestreo aleatorio estratificado.

La recolección de la información se hizo directamente sobre los expedientes que reposaban en la Corte Constitucional, excepto en el caso del año 2006, período en el que, para la obtención de la información en los respectivos juzgados locales, fue necesario recurrir a funcionarios de las 35 regionales de la Defensoría del Pueblo, estudiantes de reconocidas universidades del país y personeros municipales.

Para determinar los contenidos del POS, tanto en el régimen contributivo como subsidiado, se contó con la colaboración de varios expertos en auditoría de los dos regímenes, quienes colaboraron en la respectiva clasificación.

Adicionalmente, se tuvieron en cuenta la Resolución 5261 de 2004 y todos los acuerdos que la complementan; conceptos expedidos por el Ministerio de la Protección Social y el Ministerio de Hacienda y Crédito Público; las circulares expedidas por la Superintendencia Nacional de Salud y Minprotección Social; además de las normas que rigen en materia de promoción y prevención.

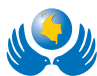

## 2.1. CARACTERÍSTICAS DE LA MUESTRA

**Población objetivo:** tutelas que durante el período 2006-2008 invocaron vulneraciones al derecho a la salud.

**Marco muestral:** tutelas registradas en la base de datos de la Corte Constitucional en el período 2006-2008

**Modelo de muestreo:** tipo aleatorio estratificado por período y departamento con asignación proporcional, un nivel de confianza del 95% y un margen de error del 2.8%.

**Tamaño de la muestra:** 6.230 tutelas que invocaron el derecho a la salud, lo cual incluye un estimado del 2% de “no respuesta”. La distribución selectiva tuvo en cuenta el número de tutelas en salud, por período y departamento, que sirvió como ponderador. El análisis crítico de la información condujo a que se eliminaran 66 unidades muestrales (1% del grupo denominado de no respuesta). De este modo, el número final de tutelas en salud válidas para el análisis fue de 6.164.

**Unidad de análisis:** tutela en la cual el ciudadano invocó el derecho a la salud.

## 2.2. CAPACITACIÓN

La capacitación para los supervisores y recolectores de la información fue impartida por los asesores del grupo de salud en cada una de las visitas efectuadas a las regionales de la entidad. La capacitación fue teórica y práctica. En la parte teórica, el énfasis de la capacitación se centró en aspectos relacionados con el sistema de seguridad social en salud y los planes de beneficio; en la parte práctica se instruyó en el manejo de la “Reseña esquemática de tutela” elaborada para extraer la información de los expedientes (anexo 1). A los personeros municipales se les remitió un manual de recolección que incluía todos los aspectos anteriores.

## 3. RESULTADOS

### 3.1. LA TUTELA EN GENERAL

A pesar de que se han expedido nuevas leyes que protegen a los ciudadanos en sus derechos, los colombianos continúan viendo la acción de tutela como el mecanismo más efectivo para hacerlos valer y acceder a ellos. Así lo demuestran las cifras arrojadas en este estudio de actualización, donde se ve el aumento año tras año de las acciones interpuestas para reclamar sus derechos.

De la última década, el año 2008 fue el que mayor número de acciones registró, con un incremento del 21.45% sobre el año 2007 y del 300% en relación con el año 1999, período a partir del cual la Defensoría tomó los primeros registros. (*Tabla N°1*).

**TABLA N° 1.**

| Registro de tutelas en Colombia. Período 1999-2008 |                  |                   |
|----------------------------------------------------|------------------|-------------------|
| AÑO                                                | Nº. Tutelas      | Crecimiento anual |
| 1999                                               | 86.313           | -                 |
| 2000                                               | 131.764          | 52,66%            |
| 2001                                               | 133.272          | 1,14%             |
| 2002                                               | 143.887          | 7,96%             |
| 2003                                               | 149.439          | 3,86%             |
| 2004                                               | 198.125          | 32,58%            |
| 2005                                               | 224.270          | 13,20%            |
| 2006                                               | 256.166          | 14,22%            |
| 2007                                               | 283.637          | 10,72%            |
| 2008                                               | 344.468          | 21,45%            |
| <b>Total</b>                                       | <b>1.951.341</b> |                   |

Fuente: Corte Constitucional



Este crecimiento se debe a varios factores: por un lado, al conocimiento que tienen los ciudadanos de la tutela como medio efectivo para hacer valer sus derechos y por otro, al caso omiso que hacen las autoridades y entidades (públicas y privadas) que prestan servicios públicos de las reclamaciones o solicitudes formales o a la demora en la solución. Lo anterior hace que los juzgados se vean saturados de procesos de tutelas innecesarios, como las respuestas a derechos de petición o incumplimiento de sentencias emitidas por la Corte Constitucional para proteger a sectores vulnerables, como la población desplazada<sup>1</sup>

### 3.1.1. LOS DERECHOS TUTELADOS

Por primera vez en los estudios de la Defensoría apareció que el derecho a la salud fue el más invocado en las tutelas, por encima del derecho de petición y del derecho a la vida. Esta situación se debe a la reiterada jurisprudencia de la Corte Constitucional, la cual establece como fundamental el derecho a la salud. En el año 2008 su participación dentro de las tutelas en general fue del 41.52%, seguido por el derecho de petición, con un 32.9%, y el de la vida, con un 25.7 %. (*Tabla N°2*).

En el caso del derecho de petición, que es el segundo más invocado, obedece a demoras en las respuestas, respuestas que no resuelven de fondo la petición del usuario o simplemente su no respuesta. Tal es el caso de los derechos de petición elevados ante el Seguro Social, Cajanal y Fopep, entre otras entidades, por solicitudes de pensión que finalmente se convierten en tutela, lo que congestiona el sistema judicial. Por lo anterior, el señor Presidente de la República en la Directiva Presidencial N° 04 del 22 de mayo de 2009 les ordenó a los servidores públicos cumplir estrictamente con la forma, contenido y oportunidad en que se da respuesta a las peticiones presentadas en los términos establecidos en la ley. Esta entidad espera que el cumplimiento de esta directiva reduzca las acciones de tutela por este concepto.

<sup>1</sup> Corte Constitucional. Sentencia T-025 de 2004

TABLA N° 2.

| Derechos invocados en las Tutelas. Período 2006-2008 |                |              |                |              |                |              |                |              |
|------------------------------------------------------|----------------|--------------|----------------|--------------|----------------|--------------|----------------|--------------|
|                                                      | PERÍODO        |              |                |              |                |              |                |              |
|                                                      | 2006           |              | 2007           |              | 2008           |              | Total          |              |
|                                                      | N° Tutelas     | % en Tutelas |
| Salud                                                | 96.229         | 37,6         | 107.238        | 37,8         | 142.957        | 41,5         | 346.424        | 39,2         |
| Petición                                             | 99.819         | 39,0         | 103.844        | 36,6         | 113.224        | 32,9         | 316.887        | 35,8         |
| Vida                                                 | 86.320         | 33,7         | 91.251         | 32,2         | 88.621         | 25,7         | 266.192        | 30,1         |
| Derechos económicos, sociales y culturales           | 68.033         | 26,6         | 57.594         | 20,3         | 77.268         | 22,4         | 202.895        | 22,9         |
| Debido proceso y defensa                             | 40.270         | 15,7         | 44.364         | 15,6         | 42.281         | 12,3         | 126.915        | 14,4         |
| Vida digna y dignidad humana                         | 16.189         | 6,3          | 16.810         | 5,9          | 41.197         | 12,0         | 74.196         | 8,4          |
| Igualdad                                             | 17.151         | 6,7          | 14.292         | 5,0          | 17.176         | 5,0          | 48.619         | 5,5          |
| Trabajo                                              | 8.718          | 3,4          | 7.541          | 2,7          | 9.071          | 2,6          | 25.330         | 2,9          |
| Protección al menor y mujer embarazada               | 3.685          | 1,4          | 3.959          | 1,4          | 4.878          | 1,4          | 12.522         | 1,4          |
| Libertad de enseñanza, educación, investigación      | 2.791          | 1,1          | 5.675          | 2,0          | 3.443          | 1,0          | 11.909         | 1,3          |
| Integridad física                                    | 4.458          | 1,7          | 1.838          | 0,6          | 5.299          | 1,5          | 11.595         | 1,3          |
| Intimidad, buen nombre y honra                       | 2.668          | 1,0          | 3.007          | 1,1          | 3.196          | 0,9          | 8.871          | 1,0          |
| Personalidad jurídica                                | 534            | 0,2          | 834            | 0,3          | 970            | 0,3          | 2.338          | 0,3          |
| Libertad individual                                  | 707            | 0,3          | 513            | 0,2          | 528            | 0,2          | 1.748          | 0,2          |
| Libre desarrollo de la personalidad                  | 670            | 0,3          | 502            | 0,2          | 566            | 0,2          | 1.738          | 0,2          |
| Libertad de asociación                               | 592            | 0,2          | 445            | 0,2          | 394            | 0,1          | 1.431          | 0,2          |
| Derechos colectivos y del medio ambiente             | 231            | 0,1          | 367            | 0,1          | 295            | 0,1          | 893            | 0,1          |
| Derechos políticos                                   | 144            | 0,1          | 468            | 0,2          | 250            | 0,1          | 862            | 0,1          |
| Libertad de expresión e información                  | 180            | 0,1          | 176            | 0,1          | 299            | 0,1          | 655            | 0,1          |
| Libertad de locomoción                               | 134            | 0,1          | 121            | 0,0          | 117            | 0,0          | 372            | 0,0          |
| Paz                                                  | 61             | 0,0          | 45             | 0,0          | 53             | 0,0          | 159            | 0,0          |
| Libertad de escoger profesión u oficio               | 21             | 0,0          | 67             | 0,0          | 28             | 0,0          | 116            | 0,0          |
| Libertad de culto                                    | 20             | 0,0          | 28             | 0,0          | 27             | 0,0          | 75             | 0,0          |
| Libertad de conciencia                               | 15             | 0,0          | 12             | 0,0          | 13             | 0,0          | 40             | 0,0          |
| Otros                                                | 2.275          | 0,9          | 5.985          | 2,1          | 637            | 0,2          | 8.897          | 1,0          |
| <b>TOTAL TUTELAS INTERPUESTAS</b>                    | <b>256.166</b> |              | <b>283.637</b> |              | <b>344.468</b> |              | <b>884.271</b> |              |



### 3.1.1.1. Tutelas por departamento

Bogotá, Antioquia y Valle concentran el 55.1% de las tutelas. Esto obedece, en parte, a que estos lugares albergan mayor población y son centros receptores de comunidad desplazada que, con el tiempo, exigen sus derechos a través de este instrumento. También obedece al mayor conocimiento sobre este mecanismo de protección, entregado, entre otras, por entidades como la Defensoría del Pueblo y las personerías municipales, que vienen empoderando a las poblaciones vulnerables en el tema de solicitar la protección de sus derechos fundamentales. Hay que anotar que Bogotá a pesar de tener el mayor número de tutelas viene disminuyendo en su participación en los últimos tres años (*Tabla N° 3*).

TABLA N° 3.

| N° DE TUTELAS, SEGÚN DEPARTAMENTO |            |         |            |         |            |         |            |         |
|-----------------------------------|------------|---------|------------|---------|------------|---------|------------|---------|
|                                   | PERÍODO    |         |            |         |            |         |            |         |
|                                   | 2006       |         | 2007       |         | 2008       |         | Total      |         |
|                                   | N° Tutelas | Part. % |
| Bogotá, D. C.                     | 72.648     | 28,4    | 76.035     | 26,8    | 71.941     | 20,9    | 220.624    | 24,9    |
| Antioquia                         | 50.884     | 19,9    | 53.177     | 18,7    | 73.268     | 21,3    | 177.329    | 20,1    |
| Valle                             | 22.504     | 8,8     | 29.329     | 10,3    | 37.263     | 10,8    | 89.096     | 10,1    |
| Atlántico                         | 13.839     | 5,4     | 14.711     | 5,2     | 19.171     | 5,6     | 47.721     | 5,4     |
| Santander                         | 11.632     | 4,5     | 12.877     | 4,5     | 17.424     | 5,1     | 41.933     | 4,7     |
| Tolima                            | 8.306      | 3,2     | 9.623      | 3,4     | 13.094     | 3,8     | 31.023     | 3,5     |
| Bolívar                           | 7.417      | 2,9     | 9.037      | 3,2     | 12.364     | 3,6     | 28.818     | 3,3     |
| Caldas                            | 8.479      | 3,3     | 10.089     | 3,6     | 12.406     | 3,6     | 30.974     | 3,5     |
| Boyacá                            | 4.590      | 1,8     | 4.628      | 1,6     | 5.517      | 1,6     | 14.735     | 1,7     |
| Norte de Santander                | 5.790      | 2,3     | 5.636      | 2,0     | 6.767      | 2,0     | 18.193     | 2,1     |
| Cesar                             | 4.595      | 1,8     | 6.796      | 2,4     | 7.025      | 2,0     | 18.416     | 2,1     |
| Cauca                             | 4.691      | 1,8     | 6.337      | 2,2     | 7.124      | 2,1     | 18.152     | 2,1     |
| Magdalena                         | 4.831      | 1,9     | 5.149      | 1,8     | 8.638      | 2,5     | 18.618     | 2,1     |
| Risaralda                         | 5.794      | 2,3     | 6.365      | 2,2     | 8.560      | 2,5     | 20.719     | 2,3     |
| Huila                             | 4.280      | 1,7     | 4.777      | 1,7     | 6.413      | 1,9     | 15.470     | 1,7     |
| Córdoba                           | 4.071      | 1,6     | 4.357      | 1,5     | 6.320      | 1,8     | 14.748     | 1,7     |
| Meta                              | 3.883      | 1,5     | 4.791      | 1,7     | 5.406      | 1,6     | 14.080     | 1,6     |
| Nariño                            | 4.051      | 1,6     | 4.373      | 1,5     | 6.118      | 1,8     | 14.542     | 1,6     |
| Sucre                             | 2.692      | 1,1     | 2.802      | 1,0     | 3.800      | 1,1     | 9.294      | 1,1     |
| Cundinamarca                      | 2.791      | 1,1     | 3.174      | 1,1     | 4.523      | 1,3     | 10.488     | 1,2     |
| Quindío                           | 3.269      | 1,3     | 3.436      | 1,2     | 4.295      | 1,2     | 11.000     | 1,2     |
| Chocó                             | 1.551      | 0,6     | 1.507      | 0,5     | 1.618      | 0,5     | 4.676      | 0,5     |
| La Guajira                        | 1.136      | 0,4     | 1.624      | 0,6     | 1.436      | 0,4     | 4.196      | 0,5     |
| Caquetá                           | 809        | 0,3     | 1.095      | 0,4     | 1.437      | 0,4     | 3.341      | 0,4     |
| Casanare                          | 477        | 0,2     | 536        | 0,2     | 638        | 0,2     | 1.651      | 0,2     |
| San Andrés                        | 380        | 0,1     | 376        | 0,1     | 474        | 0,1     | 1.230      | 0,1     |
| Putumayo                          | 247        | 0,1     | 256        | 0,1     | 376        | 0,1     | 879        | 0,1     |
| Arauca                            | 264        | 0,1     | 297        | 0,1     | 377        | 0,1     | 938        | 0,1     |
| Amazonas                          | 101        | 0,0     | 224        | 0,1     | 235        | 0,1     | 560        | 0,1     |
| Guaviare                          | 56         | 0,0     | 100        | 0,0     | 216        | 0,1     | 372        | 0,0     |
| Vichada                           | 61         | 0,0     | 49         | 0,0     | 87         | 0,0     | 197        | 0,0     |
| Guainía                           | 38         | 0,0     | 59         | 0,0     | 100        | 0,0     | 197        | 0,0     |
| Vaupés                            | 9          | 0,0     | 15         | 0,0     | 37         | 0,0     | 61         | 0,0     |
| Total                             | 256.166    | 100,0   | 283.637    | 100,0   | 344.468    | 100,0   | 884.271    | 100,0   |

## 3.2. LA TUTELA Y EL DERECHO A LA SALUD

Respecto de las tutelas en salud, que es el derecho más tutelado en los últimos años, una de las intenciones de la Corte Constitucional en la sentencia T-760 de 2008 fue la de crear un trámite administrativo en cabeza de los Comités Técnico Científicos (CTC) de las aseguradoras con el fin de disminuir la interposición de estas. Sin embargo, aunque su efecto aún no se refleja en este estudio por el corto tiempo transcurrido desde que se emitió dicha sentencia, de acuerdo con el seguimiento que está realizando esta entidad en cumplimiento de la orden décima novena respecto de los servicios negados por las EPS, se evidencia el gran número de negaciones por parte de los CTC amparadas en la Resolución 3099 de 2008, que a juicio de la Defensoría finalmente conllevan a la interposición de tutelas. (Ver capítulo 4).

### 3.2.1. LA TUTELA EN SALUD DENTRO DEL MARCO GENERAL DE LA TUTELA

Los servicios y atenciones en salud a que tienen derecho los habitantes del territorio nacional están regidos por la Ley 100 de 1993, la Ley 1122 de 2007 y las respectivas normas reglamentarias, entre estas, los acuerdos emanados del Consejo Nacional de Seguridad Social en Salud (CNSSS).

Los afiliados al régimen contributivo tienen pleno derecho al Plan Obligatorio de Salud (POS) contemplado en la Resolución 5261 de 1994 y en los acuerdos del CNSSS que lo complementan. La única excepción que limita el derecho de algunos beneficios, para servicios de alto costo, es hallarse en períodos mínimos de cotización (26 semanas).

Los afiliados al régimen subsidiado gozan de un menor plan de beneficios (POS-S) estipulado en el Acuerdo 306 de 2005 del CNSSS, el cual precisa los servicios a que tiene derecho cada tipo de afiliado, según el tipo de subsidio, ya sea este pleno o parcial.

Los servicios de salud, no contemplados en el POS y POS-S, que requieren los afiliados al sistema, y los que necesita el resto de la población pobre sin cubrimiento en aseguramiento, se establece normativamente que deben ser cubiertos por el respectivo ente territorial donde reside el usuario (Ley 715 de 2001, Decreto 806 de 1998, Decreto 5334 de 2008). Los afiliados a los regímenes de excepción de que trata el artículo 279 de la Ley 100 de 1993 (Fuerzas Militares, Policía, magisterio y trabajadores de Ecopetrol) están cubiertos por los planes de beneficios propios de cada entidad.



Las constantes vulneraciones a los usuarios en los servicios de salud han traído como consecuencia que estos acudan a la tutela como su principal medio de defensa. Por ello, más de la tercera parte de las tutelas que se interponen en el país son para solicitar servicios de salud. Desde el año 2000 se observa un incremento constante en dichas solicitudes, y es el año 2008 el que presenta una mayor concentración en estas, con un 41.5%. (Tabla N° 4). (Gráfica N° 1). No obstante, se espera que esta tendencia se rompa con el cumplimiento efectivo de la sentencia T-760 de 2008 y la Directiva Presidencial No. 004 de 2009.

TABLA N° 4.

| PARTICIPACIÓN DE LAS TUTELAS DE SALUD<br>Período 1999-2008 |                |                  |               |                           |        |
|------------------------------------------------------------|----------------|------------------|---------------|---------------------------|--------|
| AÑO                                                        | TUTELAS        |                  | PARTICIPACIÓN | TASA DE CRECIMIENTO ANUAL |        |
|                                                            | SALUD          | TOTAL            |               | SALUD                     | TOTAL  |
| 1999                                                       | 21.301         | 86.313           | 24,68%        | -                         | -      |
| 2000                                                       | 24.843         | 131.764          | 18,85%        | 16,63%                    | 52,66% |
| 2001                                                       | 34.319         | 133.272          | 25,75%        | 38,14%                    | 1,14%  |
| 2002                                                       | 42.734         | 143.887          | 29,70%        | 24,52%                    | 7,96%  |
| 2003                                                       | 51.944         | 149.439          | 34,76%        | 21,55%                    | 3,86%  |
| 2004                                                       | 72.033         | 198.125          | 36,36%        | 38,67%                    | 32,58% |
| 2005                                                       | 81.017         | 224.270          | 36,12%        | 12,47%                    | 13,20% |
| 2006                                                       | 96.226         | 256.166          | 37,56%        | 18,77%                    | 14,22% |
| 2007                                                       | 107.238        | 283.637          | 37,81%        | 11,44%                    | 10,72% |
| 2008                                                       | 142.957        | 344.468          | 41,50%        | 33,31%                    | 21,45% |
| <b>TOTAL</b>                                               | <b>674.612</b> | <b>1.951.341</b> | <b>34,57%</b> |                           |        |

Fuente: Corte Constitucional

GRÁFICA N° 1. EVOLUCIÓN DE LAS TUTELAS. PERÍODO 1999-2008

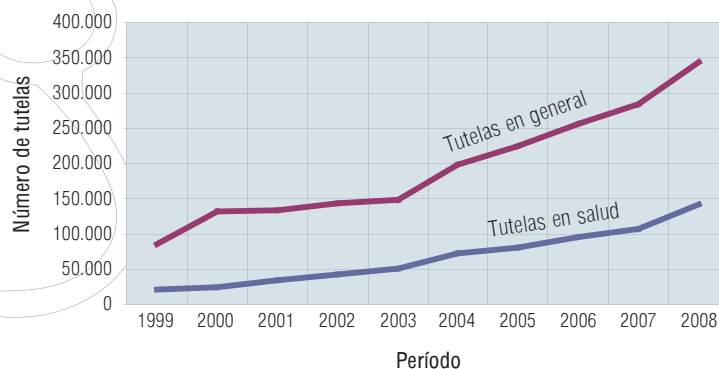

### 3.2.1.1. Número de tutelas en salud por departamento

Al igual que la tendencia de la tutela en general, las que invocan el derecho a la salud se concentran en las mismas zonas geográficas, lo que ratifica la gran influencia de las tutelas en salud dentro del marco general de la tutela. En dieciseis departamentos el derecho a la salud es el más vulnerado. (*Mapa N° 1*).

## MAPA N° 1. DERECHO MÁS VULNERADO EN CADA DEPARTAMENTO

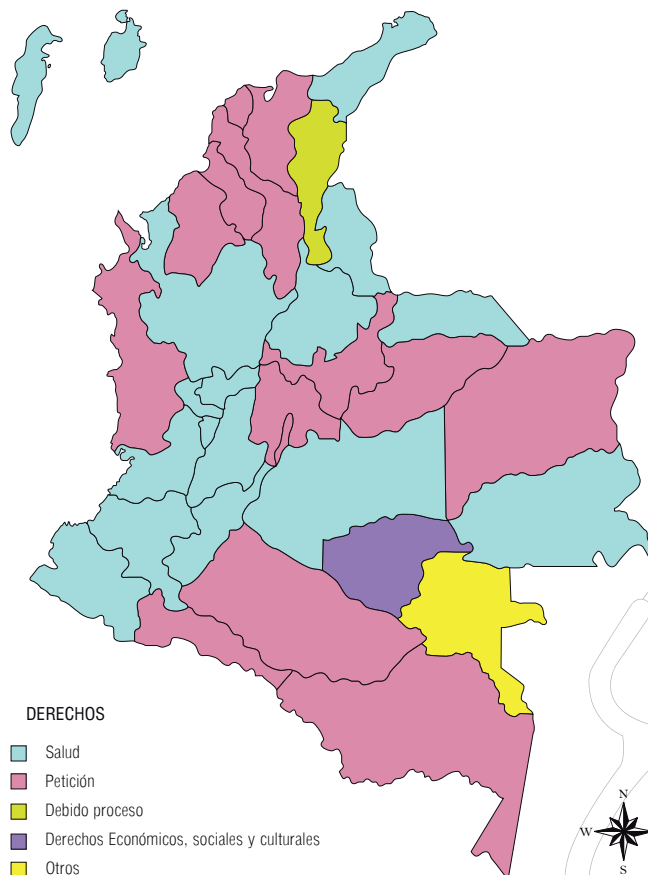

El incremento ha sido significativo en la mayoría de los departamentos, pasando de un total de 204.994 tutelas en el período 2003 - 2005 a 346.424 en el período 2006-2008. (Tabla N° 5).

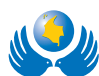

TABLA N° 5.

| TUTELAS EN SALUD, SEGÚN DEPARTAMENTO |               |              |                |              |                |              |                |              |
|--------------------------------------|---------------|--------------|----------------|--------------|----------------|--------------|----------------|--------------|
|                                      | PERÍODO       |              |                |              |                |              |                |              |
|                                      | 2006          |              | 2007           |              | 2008           |              | Total          |              |
|                                      | N° Tutelas    | Part. %      | N° Tutelas     | Part. %      | N° Tutelas     | Part. %      | N° Tutelas     | Part. %      |
| Antioquia                            | 30.106        | 31,3         | 30.374         | 28,3         | 45.332         | 31,7         | 105.812        | 30,5         |
| Bogotá, D. C.                        | 15.399        | 16,0         | 18.072         | 16,9         | 18.313         | 12,8         | 51.784         | 14,9         |
| Valle                                | 11.282        | 11,7         | 12.400         | 11,6         | 16.122         | 11,3         | 39.804         | 11,5         |
| Santander                            | 4.604         | 4,8          | 5.662          | 5,3          | 8.027          | 5,6          | 18.293         | 5,3          |
| Caldas                               | 4.702         | 4,9          | 5.428          | 5,1          | 7.516          | 5,3          | 17.646         | 5,1          |
| Risaralda                            | 3.518         | 3,7          | 3.911          | 3,6          | 5.173          | 3,6          | 12.602         | 3,6          |
| Atlántico                            | 3.008         | 3,1          | 3.596          | 3,4          | 5.584          | 3,9          | 12.188         | 3,5          |
| Tolima                               | 2.980         | 3,1          | 3.485          | 3,2          | 4.303          | 3,0          | 10.768         | 3,1          |
| Bolívar                              | 2.277         | 2,4          | 2.965          | 2,8          | 4.258          | 3,0          | 9.500          | 2,7          |
| Cauca                                | 2.236         | 2,3          | 3.253          | 3,0          | 3.510          | 2,5          | 8.999          | 2,6          |
| Norte de Santander                   | 2.254         | 2,3          | 2.533          | 2,4          | 3.025          | 2,1          | 7.812          | 2,3          |
| Nariño                               | 1.373         | 1,4          | 1.962          | 1,8          | 3.036          | 2,1          | 6.371          | 1,8          |
| Huila                                | 1.617         | 1,7          | 1.738          | 1,6          | 2.434          | 1,7          | 5.789          | 1,7          |
| Quindío                              | 1.720         | 1,8          | 1.529          | 1,4          | 2.231          | 1,6          | 5.480          | 1,6          |
| Meta                                 | 1.620         | 1,7          | 1.609          | 1,5          | 1.925          | 1,3          | 5.154          | 1,5          |
| Córdoba                              | 1.095         | 1,1          | 1.282          | 1,2          | 2.084          | 1,5          | 4.461          | 1,3          |
| Magdalena                            | 1.154         | 1,2          | 1.294          | 1,2          | 1.881          | 1,3          | 4.329          | 1,2          |
| Cesar                                | 1.154         | 1,2          | 1.360          | 1,3          | 1.740          | 1,2          | 4.254          | 1,2          |
| Boyacá                               | 1.189         | 1,2          | 1.280          | 1,2          | 1.648          | 1,2          | 4.117          | 1,2          |
| Cundinamarca                         | 775           | 0,8          | 978            | 0,9          | 1.547          | 1,1          | 3.300          | 1,0          |
| Sucre                                | 631           | 0,7          | 646            | 0,6          | 926            | 0,6          | 2.203          | 0,6          |
| La Guajira                           | 500           | 0,5          | 696            | 0,6          | 566            | 0,4          | 1.762          | 0,5          |
| Chocó                                | 348           | 0,4          | 302            | 0,3          | 444            | 0,3          | 1.094          | 0,3          |
| Caquetá                              | 177           | 0,2          | 262            | 0,2          | 437            | 0,3          | 876            | 0,3          |
| San Andrés                           | 144           | 0,1          | 159            | 0,1          | 203            | 0,1          | 506            | 0,1          |
| Casanare                             | 133           | 0,1          | 130            | 0,1          | 170            | 0,1          | 433            | 0,1          |
| Arauca                               | 89            | 0,1          | 97             | 0,1          | 143            | 0,1          | 329            | 0,1          |
| Putumayo                             | 61            | 0,1          | 79             | 0,1          | 151            | 0,1          | 291            | 0,1          |
| Amazonas                             | 30            | 0,0          | 65             | 0,1          | 85             | 0,1          | 180            | 0,1          |
| Guainía                              | 18            | 0,0          | 34             | 0,0          | 75             | 0,1          | 127            | 0,0          |
| Guaviare                             | 16            | 0,0          | 42             | 0,0          | 34             | 0,0          | 92             | 0,0          |
| Vichada                              | 17            | 0,0          | 12             | 0,0          | 28             | 0,0          | 57             | 0,0          |
| Vaupés                               | 2             | 0,0          | 3              | 0,0          | 6              | 0,0          | 11             | 0,0          |
| <b>Total</b>                         | <b>96.229</b> | <b>100,0</b> | <b>107.238</b> | <b>100,0</b> | <b>142.957</b> | <b>100,0</b> | <b>346.424</b> | <b>100,0</b> |

Con el fin de hacer comparativo el volumen y la evolución en la interposición de tutelas en relación con la población y la serie en análisis, el número de tutelas se ajustó en cada departamento a un indicador de número de tutelas por cada 10.000 habitantes.

Bajo esa técnica metodológica, en el último año, Caldas registra 77.1 tutelas por cada 10.000 habitantes, supera a Antioquia, que registra 76.7. (*Tabla N° 6*). (*Mapa N° 2*). Es de destacar que este indicador presenta un comportamiento ascendente desde el año 2003 en la mayoría de los departamentos.

Para esta Defensoría, una de las razones por la cual el departamento de Caldas ocupa el primer lugar en este indicador tiene que ver con la no garantía de oferta de servicios en la red local, lo que ocasiona que los servicios sean autorizados para llevarse a cabo en la ciudad de Pereira, con sustento en las reiteradas quejas de los usuarios ante la defensoría regional.

Los denominados nuevos departamentos, que en estudios anteriores no superaban las cifras de 1 ó 2 tutelas por cada 10.000 habitantes, hoy presentan cifras de 3, 4 y hasta 5 tutelas.

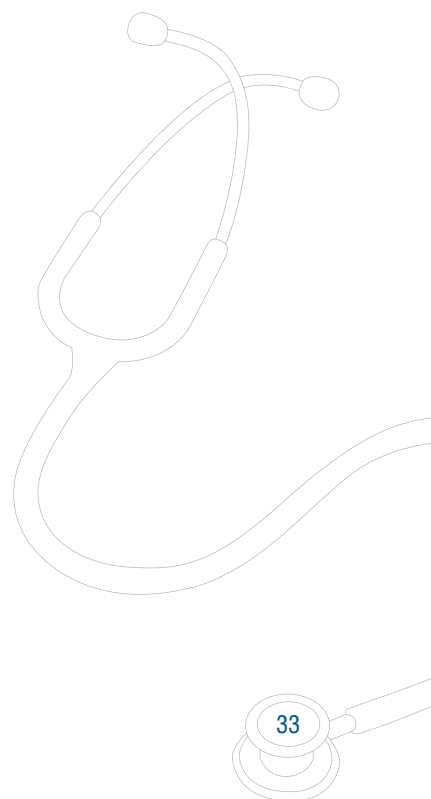



TABLA N° 6.

| N° DE TUTELAS EN SALUD POR CADA 10.000 HABITANTES, SEGÚN DEPARTAMENTO |             |             |             |                         |
|-----------------------------------------------------------------------|-------------|-------------|-------------|-------------------------|
|                                                                       | Período     |             |             |                         |
|                                                                       | 2006        | 2007        | 2008        | Promedio últimos 3 años |
| Caldas                                                                | 48,4        | 55,8        | 77,1        | 60,5                    |
| Antioquia                                                             | 52,3        | 52,1        | 76,7        | 60,4                    |
| Risaralda                                                             | 39,0        | 43,0        | 56,6        | 46,2                    |
| Quindío                                                               | 32,0        | 28,3        | 41,0        | 33,8                    |
| Valle                                                                 | 26,8        | 29,2        | 37,6        | 31,2                    |
| Santander                                                             | 23,4        | 28,6        | 40,3        | 30,8                    |
| Tolima                                                                | 21,8        | 25,4        | 31,2        | 26,1                    |
| Bogotá, D. C.                                                         | 22,2        | 25,6        | 25,6        | 24,5                    |
| San Andrés                                                            | 20,3        | 22,2        | 28,1        | 23,6                    |
| Cauca                                                                 | 17,5        | 25,3        | 27,1        | 23,3                    |
| Meta                                                                  | 20,2        | 19,7        | 23,0        | 21,0                    |
| Norte de Santander                                                    | 18,0        | 20,0        | 23,7        | 20,6                    |
| Huila                                                                 | 15,8        | 16,7        | 23,1        | 18,6                    |
| Atlántico                                                             | 13,7        | 16,2        | 24,8        | 18,3                    |
| Bolívar                                                               | 12,0        | 15,5        | 22,0        | 16,5                    |
| Cesar                                                                 | 12,6        | 14,6        | 18,5        | 15,3                    |
| Nariño                                                                | 8,8         | 12,4        | 19,0        | 13,4                    |
| Magdalena                                                             | 10,0        | 11,1        | 15,9        | 12,3                    |
| Guainía                                                               | 5,0         | 9,3         | 20,2        | 11,6                    |
| Boyacá                                                                | 9,4         | 10,2        | 13,0        | 10,9                    |
| Córdoba                                                               | 7,4         | 8,5         | 13,6        | 9,8                     |
| Sucre                                                                 | 8,1         | 8,2         | 11,6        | 9,3                     |
| Amazonas                                                              | 4,4         | 9,4         | 12,1        | 8,6                     |
| La Guajira                                                            | 7,1         | 9,5         | 7,4         | 8,0                     |
| Chocó                                                                 | 7,6         | 6,5         | 9,5         | 7,9                     |
| Caquetá                                                               | 4,2         | 6,1         | 10,0        | 6,8                     |
| Casanare                                                              | 4,4         | 4,2         | 5,4         | 4,7                     |
| Cundinamarca                                                          | 3,3         | 4,1         | 6,5         | 4,7                     |
| Arauca                                                                | 3,8         | 4,1         | 5,9         | 4,6                     |
| Vichada                                                               | 3,0         | 2,0         | 4,6         | 3,2                     |
| Guaviare                                                              | 1,6         | 4,3         | 3,4         | 3,1                     |
| Putumayo                                                              | 1,9         | 2,5         | 4,7         | 3,1                     |
| Vaupés                                                                | 0,5         | 0,7         | 1,5         | 0,9                     |
| <b>NACIONAL</b>                                                       | <b>22,2</b> | <b>24,4</b> | <b>32,2</b> | <b>26,3</b>             |

MAPA N° 2. TUTELAS POR CADA 10.000 HABITANTES

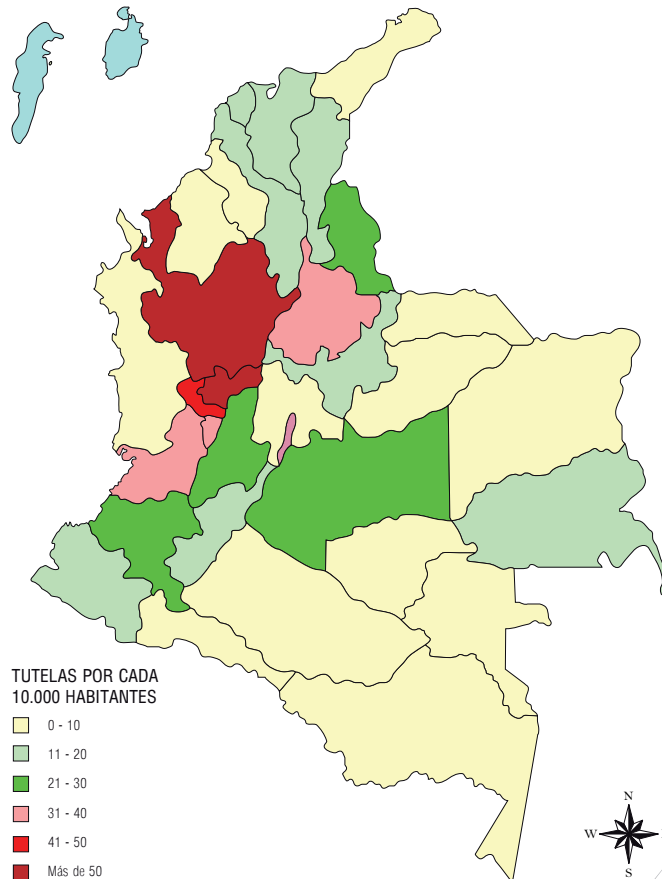

### 3.2.1.2. Orientación de las decisiones en primera instancia

A pesar de que varios actores del sistema cuestionan las decisiones de los jueces de tutela, estas favorecen a los accionantes en un 86%, porcentaje mayor al observado en años anteriores; la cifra que tiende a aumentar, pues del 14% restante una gran mayoría son negadas no por falta de mérito para tutelarlas, sino por carencia de objeto (fallecimiento del actor), o hecho superado, que se da cuando en su transcurso, la entidad accionada otorga lo solicitado, de tal forma que cuando se produce el fallo ya no existen los fundamentos para concederla.



Al observar las decisiones por tipo de juzgado, son los jueces de familia y de menores los que más favorecen a los accionantes, en gran parte debido al estado de protección especial en el que los niños se encuentran.

### 3.2.1.3. Tutelas en salud tramitadas por juzgados

Los juzgados penales siguen siendo los despachos que tramitan el mayor número de acciones, gestionando el 42.8%, las cuales son concedidas en más del 87% de los casos. (Tabla N° 7).

TABLA N° 7.

| TUTELAS EN SALUD TRAMITADAS, SEGÚN JUZGADO |               |              |                |              |                |              |                |              |
|--------------------------------------------|---------------|--------------|----------------|--------------|----------------|--------------|----------------|--------------|
|                                            | PERÍODO       |              |                |              |                |              |                |              |
|                                            | 2006          |              | 2007           |              | 2008           |              | Total          |              |
|                                            | N° de Tutelas | Part. %      | N° de Tutelas  | Part. %      | N° de Tutelas  | Part. %      | N° de Tutelas  | Part. %      |
| Juzgado Penal Municipal                    | 26.674        | 27,7         | 29.349         | 27,4         | 37.212         | 26,0         | 93.235         | 26,9         |
| Juzgado Civil Municipal                    | 24.457        | 25,4         | 28.346         | 26,4         | 35.314         | 24,7         | 88.117         | 25,4         |
| Juzgado Penal del Circuito                 | 15.471        | 16,1         | 14.898         | 13,9         | 19.586         | 13,7         | 49.955         | 14,4         |
| Juzgado Civil del Circuito                 | 10.886        | 11,3         | 11.973         | 11,2         | 15.810         | 11,1         | 38.669         | 11,2         |
| Juzgado Promiscuo Municipal                | 4.096         | 4,3          | 5.127          | 4,8          | 8.085          | 5,7          | 17.308         | 5,0          |
| Juzgado Laboral del Circuito               | 4.228         | 4,4          | 3.494          | 3,3          | 5.455          | 3,8          | 13.177         | 3,8          |
| Juzgado de Familia                         | 3.608         | 3,7          | 3.018          | 2,8          | 4.733          | 3,3          | 11.359         | 3,3          |
| Juzgados Administrativos                   | 113           | 0,1          | 4.102          | 3,8          | 7.060          | 4,9          | 11.275         | 3,3          |
| Juzgado Promiscuo de Familia               | 1.257         | 1,3          | 1.800          | 1,7          | 2.711          | 1,9          | 5.768          | 1,7          |
| Juzgado de Menores                         | 1.635         | 1,7          | 1.373          | 1,3          | 1.623          | 1,1          | 4.631          | 1,3          |
| Juzgado de Ejecución de Penas              | 1.190         | 1,2          | 1.227          | 1,1          | 1.663          | 1,2          | 4.080          | 1,2          |
| Juzgado Promiscuo del Circuito             | 843           | 0,9          | 1.095          | 1,0          | 1.843          | 1,3          | 3.781          | 1,1          |
| Tribunal Superior                          | 822           | 0,9          | 645            | 0,6          | 772            | 0,5          | 2.239          | 0,6          |
| Tribunal Administrativo                    | 364           | 0,4          | 277            | 0,3          | 342            | 0,2          | 983            | 0,3          |
| Juzgado Penal del Circuito Especializado   | 313           | 0,3          | 301            | 0,3          | 334            | 0,2          | 948            | 0,3          |
| Consejo Seccional de la Judicatura         | 170           | 0,2          | 89             | 0,1          | 183            | 0,1          | 442            | 0,1          |
| Unidad Judicial Municipal                  | 54            | 0,1          | 70             | 0,1          | 128            | 0,1          | 252            | 0,1          |
| Juzgado Familia del Circuito               | 11            | 0,0          | 34             | 0,0          | 62             | 0,0          | 107            | 0,0          |
| Corte Suprema de Justicia                  | 28            | 0,0          | 17             | 0,0          | 31             | 0,0          | 76             | 0,0          |
| Consejo de Estado                          | 9             | 0,0          | 3              | 0,0          | 10             | 0,0          | 22             | 0,0          |
| <b>Total</b>                               | <b>96.229</b> | <b>100,0</b> | <b>107.238</b> | <b>100,0</b> | <b>142.957</b> | <b>100,0</b> | <b>346.424</b> | <b>100,0</b> |

### 3.2.1.4. El derecho a la salud como fundamental y su relación con otros derechos del mismo orden

En sentencia T-760 de 2008, la Corte Constitucional ratificó el derecho a la salud como un derecho fundamental así sea considerado usualmente por la doctrina como un derecho social y tenga una dimensión prestacional. La Corte lo ha protegido por tres vías. La primera ha sido su relación de conexidad con el derecho a la vida, el derecho a la integridad personal y el derecho a la dignidad humana; la segunda, su naturaleza fundamental en contextos donde el tutelante es un sujeto de especial protección, y la tercera, su fundamentalidad en lo que respecta a un ámbito básico.

La Corte estableció que los derechos fundamentales son aquellos respecto de los cuales existe consenso sobre su naturaleza fundamental; que es todo derecho constitucional dirigido a lograr la dignidad humana y que sea traducible en un derecho subjetivo; también señaló que el derecho a la salud es un derecho fundamental “de manera autónoma”, cuando se puede concretar en una garantía subjetiva derivada de las normas que rigen el derecho a la salud, ya sea que se encuentren en la Constitución, en el bloque de constitucionalidad o en las leyes o normas que nos rigen.

Concretamente, la jurisprudencia constitucional señaló que el acceso a un servicio de salud que se requiera, contemplado en los planes obligatorios, es un derecho fundamental autónomo. En tal medida, la negación de los servicios de salud contemplados en el POS es una violación del derecho fundamental a la salud; por tanto, se trata de una prestación claramente exigible y justiciable mediante acción de tutela.

Sin embargo, la Corte Constitucional también ha señalado que reconocer la fundamentalidad de un derecho no implica que todos los aspectos cobijados por este son tutelables, porque los derechos constitucionales no son absolutos, es decir, pueden ser limitados de conformidad con los criterios de razonabilidad y proporcionalidad que ha fijado la jurisprudencia constitucional y porque la posibilidad de exigir el cumplimiento de las obligaciones derivadas de un derecho fundamental y la procedencia de hacerlo por medio de la acción de tutela son cuestiones diferentes y separables.

Al analizar los datos arrojados en este estudio se ve cómo la exigencia del derecho a la salud ha ido aumentando, hasta llegar a las 142.957 tutelas en el último año. Los usuarios asocian su derecho a la salud con otros derechos como el de la vida, que obtuvo un total de 83.274 tutelas durante el mismo período. Igualmente, lo asocian al derecho a la vida digna, a la dignidad humana y a la protección de grupos especiales en menor proporción. (*Tabla N° 8*).



TABLA N° 8.

| El derecho a la salud como fundamental y su relación con otros derechos. Período 2006-2008 |               |              |                |              |                |              |                |              |
|--------------------------------------------------------------------------------------------|---------------|--------------|----------------|--------------|----------------|--------------|----------------|--------------|
|                                                                                            | PERÍODO       |              |                |              |                |              |                |              |
|                                                                                            | 2006          |              | 2007           |              | 2008           |              | Total          |              |
|                                                                                            | N° Tutelas    | % en Tutelas | N° Tutelas     | % en Tutelas | N° Tutelas     | % en Tutelas | N° Tutelas     | % en Tutelas |
| <b>Salud</b>                                                                               | 96.229        | 100,0        | 107.238        | 100,0        | 142.957        | 100,0        | 346.424        | 100,0        |
| Vida                                                                                       | 82.353        | 85,6         | 88.126         | 82,2         | 83.274         | 58,3         | 253.753        | 73,2         |
| Derechos económicos, sociales y culturales                                                 | 44.807        | 46,6         | 36.327         | 33,9         | 43.163         | 30,2         | 124.297        | 35,9         |
| Vida digna y dignidad humana                                                               | 10.749        | 11,2         | 10.980         | 10,2         | 27.217         | 19,0         | 48.946         | 14,1         |
| Integridad física                                                                          | 3.925         | 4,1          | 1.369          | 1,3          | 4.375          | 3,1          | 9.669          | 2,8          |
| Protección al menor y mujer embarazada                                                     | 1.734         | 1,8          | 1.833          | 1,7          | 2.304          | 1,6          | 5.871          | 1,7          |
| Igualdad                                                                                   | 2.004         | 2,1          | 964            | 0,9          | 2.301          | 1,6          | 5.269          | 1,5          |
| Petición                                                                                   | 1.397         | 1,5          | 738            | 0,7          | 890            | 0,6          | 3.025          | 0,9          |
| Trabajo                                                                                    | 533           | 0,6          | 362            | 0,3          | 525            | 0,4          | 1.420          | 0,4          |
| Debido proceso y defensa                                                                   | 535           | 0,6          | 319            | 0,3          | 352            | 0,2          | 1.206          | 0,3          |
| Derechos colectivos y del medio ambiente                                                   | 108           | 0,1          | 163            | 0,2          | 105            | 0,1          | 376            | 0,1          |
| Libertad de enseñanza, educación, investigación                                            | 95            | 0,1          | 76             | 0,1          | 196            | 0,1          | 367            | 0,1          |
| Intimidad, buen nombre y honra                                                             | 64            | 0,1          | 61             | 0,1          | 58             | 0,0          | 183            | 0,1          |
| Libre desarrollo de la personalidad                                                        | 55            | 0,1          | 41             | 0,0          | 72             | 0,1          | 168            | 0,0          |
| Personalidad jurídica                                                                      | 3             | 0,0          | 30             | 0,0          | 29             | 0,0          | 62             | 0,0          |
| Libertad individual                                                                        | 12            | 0,0          | 20             | 0,0          | 17             | 0,0          | 49             | 0,0          |
| Paz                                                                                        | 12            | 0,0          | 7              | 0,0          | 5              | 0,0          | 24             | 0,0          |
| Libertad de locomoción                                                                     | 11            | 0,0          | 6              | 0,0          | 6              | 0,0          | 23             | 0,0          |
| Derechos políticos                                                                         | 1             | 0,0          | 12             | 0,0          | 1              | 0,0          | 14             | 0,0          |
| Libertad de expresión e información                                                        | 7             | 0,0          | 2              | 0,0          | 5              | 0,0          | 14             | 0,0          |
| Libertad de asociación                                                                     | 1             | 0,0          | 5              | 0,0          | 5              | 0,0          | 11             | 0,0          |
| Libertad de culto                                                                          | 1             | 0,0          | 0              | 0,0          | 2              | 0,0          | 3              | 0,0          |
| Libertad de escoger profesión u oficio                                                     | 0             | 0,0          | 1              | 0,0          | 0              | 0,0          | 1              | 0,0          |
| Otros                                                                                      | 689           | 0,7          | 2.644          | 2,5          | 44             | 0,0          | 3.377          | 1,0          |
| <b>TOTAL TUTELAS INTERPUESTAS</b>                                                          | <b>96.229</b> |              | <b>107.238</b> |              | <b>142.957</b> |              | <b>346.424</b> |              |

### 3.2.1.5. Tipo de entidad demandada

En este aparte se realizó una clasificación de las entidades tuteladas según la condición del usuario de los servicios en salud, ya fuese asegurado o estuviese a cargo del ente territorial u otra entidad que administre servicios de salud. En el aseguramiento se establecieron

tres categorías: las entidades que solamente administran el régimen contributivo, las que administran solamente el régimen subsidiado y las que lo administran de manera conjunta.

Adicionalmente, las instituciones prestadoras de salud (IPS) fueron clasificadas de manera independiente cuando las acciones de tutela estaban dirigidas directamente a ellas, sin identificar la entidad aseguradora (EPS).

Según los resultados encontrados, el 78.1% de las tutelas se interponen contra las EPS que administran los regímenes contributivo y subsidiado, seguido en una menor proporción de los entes territoriales, los cuales agrupan en conjunto el 14.3% de las EPS. (Tabla N° 9). (Gráfica N° 2).

**TABLA N° 9.**

| TUTELAS EN SALUD, SEGÚN TIPO DE ENTIDAD DEMANDADA             |               |               |                |               |                |               |                |               |
|---------------------------------------------------------------|---------------|---------------|----------------|---------------|----------------|---------------|----------------|---------------|
|                                                               | PERÍODO       |               |                |               |                |               |                |               |
|                                                               | 2006          |               | 2007           |               | 2008           |               | Total          |               |
|                                                               | N° de Tutelas | Part. %       | N° de Tutelas  | Part. %       | N° de Tutelas  | Part. %       | N° de Tutelas  | Part. %       |
| EPS solamente en Régimen Contributivo                         | 55.237        | 57,4%         | 58.030         | 54,1%         | 73.961         | 51,7%         | 187.228        | 54,0%         |
| EPS en Régimen contributivo y subsidiado                      | 14.508        | 15,1%         | 16.750         | 15,6%         | 21.494         | 15,0%         | 52.752         | 15,2%         |
| Entes territoriales                                           | 13.170        | 13,7%         | 14.580         | 13,6%         | 21.675         | 15,2%         | 49.425         | 14,3%         |
| EPS Solamente en Régimen subsidiado                           | 5.858         | 6,1%          | 9.378          | 8,7%          | 15.727         | 11,0%         | 30.963         | 8,9%          |
| Instituciones Prestadoras de Salud –IPS–                      | 2.105         | 2,2%          | 2.643          | 2,5%          | 3.605          | 2,5%          | 8.353          | 2,4%          |
| Empresas del Estado                                           | 1.491         | 1,5%          | 1.294          | 1,2%          | 2.291          | 1,6%          | 5.076          | 1,5%          |
| Entidades particulares                                        | 1.074         | 1,1%          | 831            | 0,8%          | 1.034          | 0,7%          | 2.939          | 0,8%          |
| Inpec/penitenciarias                                          | 890           | 0,9%          | 870            | 0,8%          | 1.044          | 0,7%          | 2.804          | 0,8%          |
| Regímenes de excepción                                        | 689           | 0,7%          | 824            | 0,8%          | 1.007          | 0,7%          | 2.520          | 0,7%          |
| Empresas de servicios públicos                                | 666           | 0,7%          | 1.410          | 1,3%          | 421            | 0,3%          | 2.497          | 0,7%          |
| Administradoras de riesgos profesionales –ARP– y aseguradoras | 345           | 0,4%          | 391            | 0,4%          | 449            | 0,3%          | 1.185          | 0,3%          |
| Empresas de medicina prepagada                                | 88            | 0,1%          | 137            | 0,1%          | 132            | 0,1%          | 357            | 0,1%          |
| Empresas adaptadas al sistema                                 | 108           | 0,1%          | 100            | 0,1%          | 117            | 0,1%          | 325            | 0,1%          |
| <b>Total</b>                                                  | <b>96.229</b> | <b>100,0%</b> | <b>107.238</b> | <b>100,0%</b> | <b>142.957</b> | <b>100,0%</b> | <b>346.424</b> | <b>100,0%</b> |

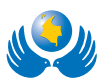

**GRÁFICA N° 2. NÚMERO DE TUTELAS POR CADA 10.000 AFILIADOS EN CADA EPS.**

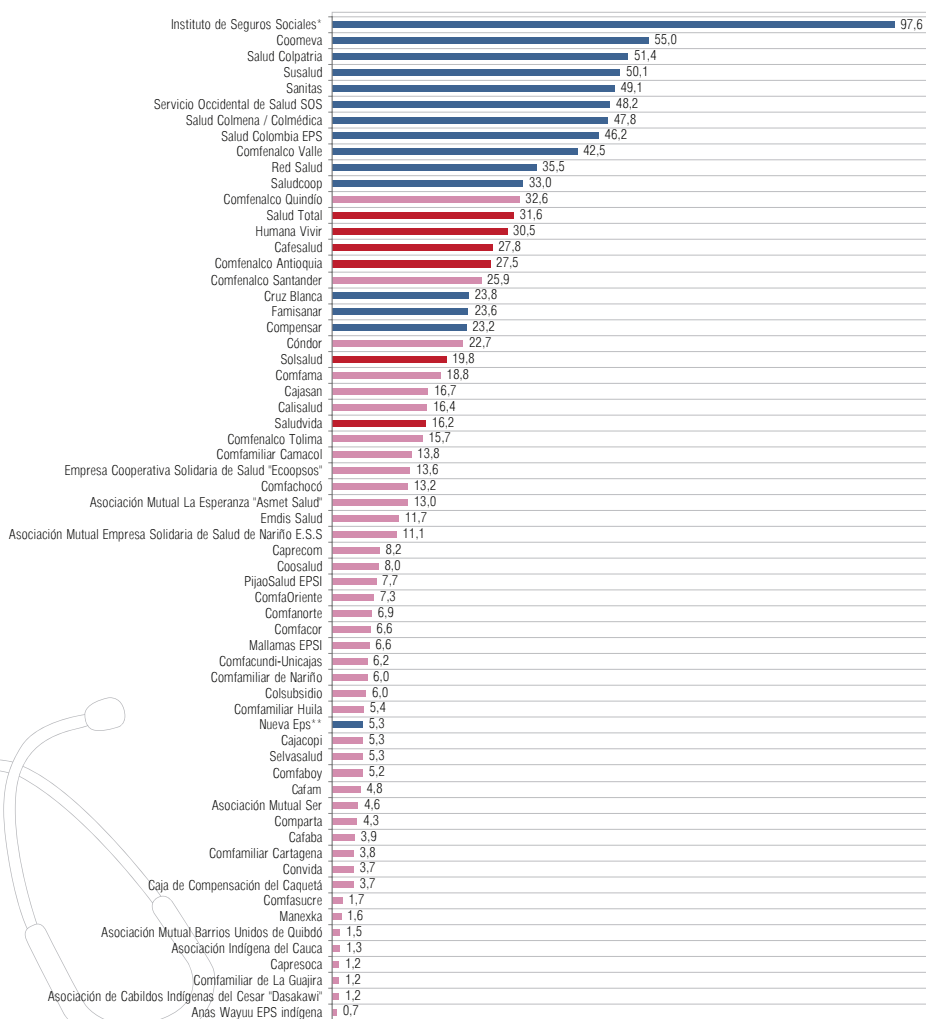

### 3.2.1.5.1. Entidades que prestan servicios solamente en el régimen contributivo

El estudio contempla catorce (14) EPS que prestan los servicios solamente al régimen contributivo. Es de anotar que el Seguro Social prestó sus servicios hasta el 31 de julio del año 2008, fecha en la cual la Nueva EPS inició operaciones y asumió los afiliados del Seguro.

Al igual que en los estudios anteriores, el Seguro Social fue la entidad más tutelada, con una participación del 31.5% en el último año, seguida de Coomeva (20.3%) y Saludcoop (15.1%), entidades que agrupan el mayor número de afiliados en el país. (Tabla N° 10).

La Nueva EPS registró 1.276 tutelas en los cinco meses que llevaba de operación.

**TABLA N° 10.**

| <b>TUTELAS EN ENTIDADES QUE PRESTAN EXCLUSIVAMENTE<br/>SERVICIO EN RÉGIMEN CONTRIBUTIVO</b> |                       |                |                       |                |                       |                |                       |                |
|---------------------------------------------------------------------------------------------|-----------------------|----------------|-----------------------|----------------|-----------------------|----------------|-----------------------|----------------|
|                                                                                             | <b>PERÍODO</b>        |                |                       |                |                       |                |                       |                |
|                                                                                             | <b>2006</b>           |                | <b>2007</b>           |                | <b>2008</b>           |                | <b>Total</b>          |                |
|                                                                                             | <b>N°<br/>Tutelas</b> | <b>Part. %</b> |
| Instituto de Seguros Sociales                                                               | 20.024                | 36,3           | 19.156                | 33,0           | 23.320                | 31,5           | 62.500                | 33,4           |
| Coomeva                                                                                     | 8.975                 | 16,2           | 10.176                | 17,5           | 15.048                | 20,3           | 34.199                | 18,3           |
| Saludcoop                                                                                   | 9.628                 | 17,4           | 10.254                | 17,7           | 11.176                | 15,1           | 31.058                | 16,6           |
| Susalud                                                                                     | 3.096                 | 5,6            | 3.969                 | 6,8            | 5.841                 | 7,9            | 12.906                | 6,9            |
| Sánitas                                                                                     | 3.898                 | 7,1            | 3.611                 | 6,2            | 3.928                 | 5,3            | 11.437                | 6,1            |
| Servicio Occidental de Salud SOS                                                            | 2.040                 | 3,7            | 2.226                 | 3,8            | 3.517                 | 4,8            | 7.783                 | 4,2            |
| Famisanar                                                                                   | 1.953                 | 3,5            | 2.421                 | 4,2            | 2.941                 | 4,0            | 7.315                 | 3,9            |
| Cruz Blanca                                                                                 | 1.650                 | 3,0            | 1.708                 | 2,9            | 1.400                 | 1,9            | 4.758                 | 2,5            |
| Colmédica                                                                                   | 1.282                 | 2,3            | 1.317                 | 2,3            | 1.830                 | 2,5            | 4.429                 | 2,4            |
| Compensar                                                                                   | 1.216                 | 2,2            | 1.518                 | 2,6            | 1.551                 | 2,1            | 4.285                 | 2,3            |
| Comfenalco Valle                                                                            | 689                   | 1,2            | 869                   | 1,5            | 1.276                 | 1,7            | 2.834                 | 1,5            |
| Nueva EPS *                                                                                 | 0                     | 0,0            | 0                     | 0,0            | 1.276                 | 1,7            | 1.276                 | 0,7            |
| Salud Colpatría                                                                             | 340                   | 0,6            | 340                   | 0,6            | 375                   | 0,5            | 1.055                 | 0,6            |
| Salud Colombia EPS                                                                          | 289                   | 0,5            | 277                   | 0,5            | 263                   | 0,4            | 829                   | 0,4            |
| Red Salud                                                                                   | 157                   | 0,3            | 188                   | 0,3            | 219                   | 0,3            | 564                   | 0,3            |
| <b>Total</b>                                                                                | <b>55.237</b>         | <b>100,0</b>   | <b>58.030</b>         | <b>100,0</b>   | <b>73.961</b>         | <b>100,0</b>   | <b>187.228</b>        | <b>100,0</b>   |

\* EPS que reemplazó al Seguro Social.

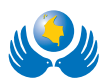

Con el fin de hacer comparativos reales de tutelas interpuestas en contra de las EPS del régimen contributivo, se elaboró el indicador de número de tutelas por cada 10.000 afiliados.

Con excepción de Cruz Blanca y Salud Colombia, todas las EPS que prestan servicios solamente en el régimen contributivo mostraron incrementos del indicador en el último año. Así, se encontró que el Seguro Social continuaba siendo la entidad más tutelada, pues presenta, hasta la fecha de funcionamiento, 97.6 tutelas por cada 10.000 afiliados. (Tabla N° 11).

En segundo lugar encontramos a Coomeva, con 55 tutelas por cada 10.000 afiliados, siendo una de las EPS que mayor incremento presentó junto a Susalud, Colmédica y Servicio Occidental de Salud.

TABLA N° 11.

| NÚMERO DE TUTELAS POR CADA 10.000 AFILIADOS                           |      |      |      |      |      |      |      |      |      |      |
|-----------------------------------------------------------------------|------|------|------|------|------|------|------|------|------|------|
| ENTIDADES QUE PRESTAN EXCLUSIVAMENTE SERVICIO EN RÉGIMEN CONTRIBUTIVO |      |      |      |      |      |      |      |      |      |      |
| ORDENADO POR AÑO 2008                                                 |      |      |      |      |      |      |      |      |      |      |
|                                                                       | 1999 | 2000 | 2001 | 2002 | 2003 | 2004 | 2005 | 2006 | 2007 | 2008 |
| Instituto de Seguros Sociales*                                        | 17,2 | 29,9 | 41,9 | 57,5 | 63,1 | 74,8 | 77,3 | 86,0 | 79,9 | 97,6 |
| Coomeva                                                               | -    | -    | -    | -    | -    | -    | 29,4 | 34,7 | 36,9 | 55,0 |
| Salud Colpatría                                                       | 1,3  | 4,1  | 17,6 | 17,0 | 20,9 | 26,9 | 32,7 | 42,7 | 43,3 | 51,4 |
| Susalud                                                               | 3,5  | 5,5  | 9,3  | 13,2 | 14,3 | 17,6 | 24,9 | 30,0 | 34,7 | 50,1 |
| Sánitas                                                               | 2,8  | 3,4  | 5,5  | 10,1 | 12,0 | 33,9 | 56,4 | 54,0 | 46,6 | 49,1 |
| Servicio Occidental de Salud SOS                                      | 2,1  | 3,4  | 5,5  | 10,1 | 11,8 | 15,3 | 25,1 | 31,1 | 30,0 | 48,2 |
| Colmédica                                                             | 4,5  | 8,1  | 6,9  | 13,3 | 17,6 | 21,7 | 32,8 | 32,3 | 32,8 | 47,8 |
| Salud Colombia EPS                                                    | -    | -    | -    | -    | 17,8 | 32,5 | 71,6 | 83,0 | 47,3 | 46,2 |
| Comfenalco Valle                                                      | 3,4  | 2,6  | 4,1  | 5,6  | 8,6  | 13,6 | 17,1 | 24,8 | 28,5 | 42,5 |
| Red Salud                                                             | -    | -    | -    | -    | 16,3 | 22,7 | 29,3 | 24,6 | 29,2 | 35,5 |
| Saludcoop                                                             | 3,4  | 3,0  | 5,6  | 8,1  | 12,4 | 22,1 | 27,6 | 31,9 | 30,7 | 33,0 |
| Cruz Blanca                                                           | 1,9  | 2,2  | 3,7  | 6,3  | 11,3 | 20,2 | 23,5 | 28,0 | 27,7 | 23,8 |
| Famisanar                                                             | 1,5  | 2,2  | 3,1  | 5,6  | 7,2  | 7,8  | 13,0 | 18,8 | 20,7 | 23,6 |
| Compensar                                                             | 1,4  | 1,9  | 2,2  | 4,5  | 7,1  | 10,1 | 14,0 | 19,0 | 22,9 | 23,2 |
| Nueva Eps**                                                           | -    | -    | -    | -    | -    | -    | -    | -    | -    | 5,3  |

\* Hasta julio de 2008

\*\* Desde agosto de 2008

### 3.2.1.5.2. Entidades que prestan servicios conjuntamente en los regímenes contributivo y subsidiado

Esta clasificación surgió porque en algunos casos, donde la entidad aseguradora prestaba servicios en los dos regímenes, en la base de datos analizada no se especificaba a cuál de ellos pertenecía el accionante.

Son seis (6) las entidades que administran servicios en ambos regímenes, y es Salud Total la que más acciones presenta en su contra, con una participación del 28%, seguida por Cafesalud (23.6%) y Solsalud (15.7%). (Tabla N° 12).

TABLA N° 12.

| TUTELAS EN ENTIDADES QUE PRESTAN SERVICIO EN LOS REGÍMENES CONTRIBUTIVO Y SUBSIDIADO SIMULTÁNEAMENTE |               |               |               |               |               |               |               |               |
|------------------------------------------------------------------------------------------------------|---------------|---------------|---------------|---------------|---------------|---------------|---------------|---------------|
|                                                                                                      | PERÍODO       |               |               |               |               |               |               |               |
|                                                                                                      | 2006          |               | 2007          |               | 2008          |               | Total         |               |
|                                                                                                      | N° Tutelas    | Part.         |
| Salud Total                                                                                          | 3.924         | 27,0%         | 4.748         | 28,3%         | 6.111         | 28,4%         | 14.783        | 28,0%         |
| Cafesalud                                                                                            | 3.898         | 26,9%         | 4.208         | 25,1%         | 4.340         | 20,2%         | 12.446        | 23,6%         |
| Solsalud                                                                                             | 2.087         | 14,4%         | 2.620         | 15,6%         | 3.584         | 16,7%         | 8.291         | 15,7%         |
| Comfenalco Antioquia                                                                                 | 1.794         | 12,4%         | 1.933         | 11,5%         | 2.988         | 13,9%         | 6.715         | 12,7%         |
| Humana Vivir                                                                                         | 1.881         | 13,0%         | 2.161         | 12,9%         | 2.481         | 11,5%         | 6.523         | 12,4%         |
| Saludvida                                                                                            | 924           | 6,4%          | 1.080         | 6,4%          | 1.990         | 9,3%          | 3.994         | 7,6%          |
| <b>Total</b>                                                                                         | <b>14.508</b> | <b>100,0%</b> | <b>16.750</b> | <b>100,0%</b> | <b>21.494</b> | <b>100,0%</b> | <b>52.752</b> | <b>100,0%</b> |

En el indicador de número de tutelas por cada 10.000 afiliados, con excepción de Cafesalud, se encontró que todas presentaron incremento significativo en el último año. (Tabla N° 13).



TABLA N° 13.

| NÚMERO DE TUTELAS POR CADA 10.000 AFILIADOS<br>EN ENTIDADES QUE PRESTAN SERVICIO EN RÉGIMENES<br>CONTRIBUTIVO Y SUBSIDIADO SIMULTÁNEAMENTE |      |      |      |      |      |      |
|--------------------------------------------------------------------------------------------------------------------------------------------|------|------|------|------|------|------|
| ORDENADO POR AÑO 2008                                                                                                                      |      |      |      |      |      |      |
|                                                                                                                                            | 2003 | 2004 | 2005 | 2006 | 2007 | 2008 |
| Salud Total                                                                                                                                | 12,1 | 15,9 | 19,8 | 22,0 | 24,9 | 31,6 |
| Humana Vivir                                                                                                                               | 10,1 | 12,1 | 20,0 | 19,6 | 22,4 | 30,5 |
| Cafesalud                                                                                                                                  | 18,3 | 23,4 | 24,2 | 25,3 | 27,9 | 27,8 |
| Comfenalco Antioquia                                                                                                                       | 13,3 | 14,4 | 15,7 | 16,6 | 19,2 | 27,5 |
| Solsalud                                                                                                                                   | 5,8  | 10,2 | 12,7 | 13,3 | 15,1 | 19,8 |
| Saludvida                                                                                                                                  | 5,5  | 8,7  | 10,1 | 10,0 | 9,8  | 16,2 |

### 3.2.1.5.3. Entidades que prestan servicios solamente en el régimen subsidiado

Aunque la interposición de tutelas en este régimen es menor respecto del contributivo, se observa un incremento significativo en los últimos años, ya que pasó de una participación del 2.8% en el 2003 al 11% en el año 2008, lo cual es proporcional al aumento de la cobertura de aseguramiento en este régimen durante el mismo período.

Es de anotar que Caprecom, por ser la entidad con mayor número de afiliados, es la que más tutelas genera, con 14.8% durante el último año, seguida de Asmet Salud, con un 10.8%. (*Tabla N° 14*).

TABLA N° 14.

| TUTELAS EN ENTIDADES QUE PRESTAN ÚNICAMENTE SERVICIO EN RÉGIMEN SUBSIDIADO |              |              |              |              |               |              |               |              |
|----------------------------------------------------------------------------|--------------|--------------|--------------|--------------|---------------|--------------|---------------|--------------|
|                                                                            | PERÍODO      |              |              |              |               |              |               |              |
|                                                                            | 2006         |              | 2007         |              | 2008          |              | Total         |              |
|                                                                            | N° Tutelas   | Part. %      | N° Tutelas   | Part. %      | N° Tutelas    | Part. %      | N° Tutelas    | Part. %      |
| Caprecom                                                                   | 944          | 16,1         | 1.266        | 13,5         | 2.329         | 14,8         | 4.539         | 14,7         |
| Asociación Mutual La Esperanza "Asmet Salud"                               | 600          | 10,2         | 1.270        | 13,5         | 1.698         | 10,8         | 3.568         | 11,5         |
| Emssanar                                                                   | 352          | 6,0          | 736          | 7,8          | 1.295         | 8,2          | 2.383         | 7,7          |
| Emdis Salud                                                                | 242          | 4,1          | 533          | 5,7          | 1.380         | 8,8          | 2.155         | 7,0          |
| Coosalud                                                                   | 492          | 8,4          | 656          | 7,0          | 986           | 6,3          | 2.134         | 6,9          |
| Empresa Cooperativa Solidaria de Salud "Ecoopos"                           | 350          | 6,0          | 657          | 7,0          | 1.038         | 6,6          | 2.045         | 6,6          |
| Comfama                                                                    | 416          | 7,1          | 616          | 6,6          | 948           | 6,0          | 1.980         | 6,4          |
| Cóndor                                                                     | 262          | 4,5          | 547          | 5,8          | 1.009         | 6,4          | 1.818         | 5,9          |
| Calisalud                                                                  | 266          | 4,5          | 353          | 3,8          | 700           | 4,5          | 1.319         | 4,3          |
| Comparta                                                                   | 217          | 3,7          | 325          | 3,5          | 610           | 3,9          | 1.152         | 3,7          |
| Asociación Mutual Ser                                                      | 106          | 1,8          | 197          | 2,1          | 449           | 2,9          | 752           | 2,4          |
| Comfenalco Quindío                                                         | 192          | 3,3          | 155          | 1,7          | 291           | 1,9          | 638           | 2,1          |
| Selvasalud                                                                 | 101          | 1,7          | 200          | 2,1          | 242           | 1,5          | 543           | 1,8          |
| Comfenalco Tolima                                                          | 127          | 2,2          | 184          | 2,0          | 208           | 1,3          | 519           | 1,7          |
| Cajacopi                                                                   | 134          | 2,3          | 141          | 1,5          | 243           | 1,5          | 518           | 1,7          |
| Colsubsidio/Comfenalco                                                     | 61           | 1,0          | 127          | 1,4          | 165           | 1,0          | 353           | 1,1          |
| Comfacor                                                                   | 78           | 1,3          | 74           | 0,8          | 196           | 1,2          | 348           | 1,1          |
| Convinda                                                                   | 62           | 1,1          | 104          | 1,1          | 179           | 1,1          | 345           | 1,1          |
| Comfamiliar Huila                                                          | 44           | 0,8          | 96           | 1,0          | 197           | 1,3          | 337           | 1,1          |
| Cafam                                                                      | 76           | 1,3          | 170          | 1,8          | 88            | 0,6          | 334           | 1,1          |
| Comfanorte/Famisalud                                                       | 82           | 1,4          | 98           | 1,0          | 141           | 0,9          | 321           | 1,0          |
| ComfaOriente                                                               | 126          | 2,2          | 85           | 0,9          | 104           | 0,7          | 315           | 1,0          |
| Mallamas EPSI                                                              | 26           | 0,4          | 108          | 1,2          | 173           | 1,1          | 307           | 1,0          |
| Comfamiliar Camacol                                                        | 60           | 1,0          | 95           | 1,0          | 131           | 0,8          | 286           | 0,9          |
| Caja Salud                                                                 | 162          | 2,8          | 67           | 0,7          | 38            | 0,2          | 267           | 0,9          |
| Comfenalco Santander                                                       | 34           | 0,6          | 59           | 0,6          | 127           | 0,8          | 220           | 0,7          |
| Asociación Mutual Barrios Unidos de Quibdó                                 | 40           | 0,7          | 57           | 0,6          | 81            | 0,5          | 178           | 0,6          |
| Unicajas/Comfacundi                                                        | 24           | 0,4          | 50           | 0,5          | 97            | 0,6          | 171           | 0,6          |
| Cajasan                                                                    | 22           | 0,4          | 61           | 0,7          | 73            | 0,5          | 156           | 0,5          |
| Comfamiliar Cartagena                                                      | 12           | 0,2          | 48           | 0,5          | 80            | 0,5          | 140           | 0,5          |
| PijaoSalud EPSI                                                            | 32           | 0,5          | 35           | 0,4          | 48            | 0,3          | 115           | 0,4          |
| Comfamiliar de Nariño                                                      | 9            | 0,2          | 27           | 0,3          | 66            | 0,4          | 102           | 0,3          |
| Comfachocó                                                                 | 13           | 0,2          | 25           | 0,3          | 59            | 0,4          | 97            | 0,3          |
| Comfaboy                                                                   | 7            | 0,1          | 27           | 0,3          | 48            | 0,3          | 82            | 0,3          |
| Asociación Indígena del Cauca                                              | 17           | 0,3          | 29           | 0,3          | 31            | 0,2          | 77            | 0,2          |
| Cafaba                                                                     | 16           | 0,3          | 17           | 0,2          | 42            | 0,3          | 75            | 0,2          |
| Capresoca                                                                  | 16           | 0,3          | 15           | 0,2          | 23            | 0,1          | 54            | 0,2          |
| Asociación de Cabildos Indígenas del Cesar "Dusakawi"                      | 10           | 0,2          | 10           | 0,1          | 22            | 0,1          | 42            | 0,1          |
| Manexka                                                                    | 4            | 0,1          | 7            | 0,1          | 28            | 0,2          | 39            | 0,1          |
| Comfasucro                                                                 | 2            | 0,0          | 19           | 0,2          | 15            | 0,1          | 36            | 0,1          |
| Caja de Compensación del Caquetá                                           | 0            | 0,0          | 7            | 0,1          | 25            | 0,2          | 32            | 0,1          |
| Comfamiliar de La Guajira                                                  | 1            | 0,0          | 11           | 0,1          | 12            | 0,1          | 24            | 0,1          |
| Anas Wayuu EPS indígena                                                    | 5            | 0,1          | 9            | 0,1          | 7             | 0,0          | 21            | 0,1          |
| Otras                                                                      | 16           | 0,3          | 5            | 0,0          | 5             | 0,0          | 26            | 0,1          |
| <b>Total</b>                                                               | <b>5.858</b> | <b>100,0</b> | <b>9.378</b> | <b>100,0</b> | <b>15.727</b> | <b>100,0</b> | <b>30.963</b> | <b>100,0</b> |



No obstante, al hacer la corrección por número de afiliados encontramos que dicha proporción no se mantiene, pues pasa Comfenalco Quindío a ser la entidad más tutelada, con 32.6 tutelas por cada 10.000 afiliados. (Tabla N° 15). En general, todas las EPS que prestan servicios solamente en el régimen subsidiado muestran incrementos en relación con el estudio anterior. Se exceptúan Cafam, Comfasucre, Asociación Indígena del Cauca y Anas Wayuu, estas dos últimas EPS indígenas.

TABLA N° 15.

| NÚMERO DE TUTELAS POR CADA 10.000 AFILIADOS                    |      |      |      |      |      |      |
|----------------------------------------------------------------|------|------|------|------|------|------|
| ENTIDADES QUE PRESTAN SOLAMENTE SERVICIO EN RÉGIMEN SUBSIDIADO |      |      |      |      |      |      |
| ORDENADO POR AÑO 2008                                          |      |      |      |      |      |      |
|                                                                | 2003 | 2004 | 2005 | 2006 | 2007 | 2008 |
| Comfenalco Quindío                                             | 8.8  | 12.6 | 18.1 | 22.7 | 18.3 | 32.6 |
| Comfenalco Santander                                           | 14.1 | 14.2 | 8.4  | 8.9  | 14.6 | 25.9 |
| Cóndor                                                         | 2.5  | 2.1  | 5.1  | 5.3  | 10.4 | 22.7 |
| Comfama                                                        | 5.7  | 6.5  | 9.7  | 9.3  | 14.3 | 18.8 |
| Cajasán                                                        | -    | -    | 0.5  | 3.6  | 9.5  | 16.7 |
| Calisalud                                                      | 4.3  | 6.7  | 8.4  | 7.4  | 8.7  | 16.4 |
| Comfenalco Tolima                                              | 5.4  | 10.2 | 11.1 | 10.6 | 15.1 | 15.7 |
| Comfamiliar Camacó                                             | 9.9  | 38.1 | 4.8  | 5.7  | 11.0 | 13.8 |
| Empresa Cooperativa Solidaria de Salud "Ecooposos"             | 2.5  | 3.4  | 5.5  | 5.4  | 9.3  | 13.6 |
| Comfachocó                                                     | -    | -    | 1.9  | 3.2  | 5.6  | 13.2 |
| Asociación Mutual La Esperanza "Asmet Salud"                   | 1.7  | 3.3  | 3.7  | 5.5  | 10.8 | 13.0 |
| Emdis Salud                                                    | 1.0  | 1.0  | 1.6  | 2.4  | 4.8  | 11.7 |
| Asociación Mutual Empresa Solidaria de Salud de Nariño E.S.S   | 2.7  | 2.9  | 3.1  | 3.6  | 6.7  | 11.1 |
| Caprecom                                                       | -    | -    | -    | 5.5  | 5.4  | 8.2  |
| Coosalud                                                       | 2.5  | 2.9  | 4.2  | 3.8  | 5.7  | 8.0  |
| PijaoSalud EPSI                                                | 0.0  | 1.0  | 1.5  | 5.2  | 5.7  | 7.7  |
| ComfaOriente                                                   | -    | -    | 2.2  | 10.1 | 6.5  | 7.3  |
| Comfanorte                                                     | -    | -    | 2.2  | 5.3  | 5.8  | 6.9  |
| Comfacor                                                       | 1.0  | 2.4  | 2.6  | 3.1  | 2.8  | 6.6  |
| Mallamas EPSI                                                  | 1.5  | 0.9  | 1.2  | 1.1  | 4.5  | 6.6  |
| Comfacundi-Unicajas                                            | -    | -    | 0.3  | 1.9  | 3.2  | 6.2  |
| Comfamiliar de Nariño                                          | -    | -    | 0.4  | 1.1  | 2.9  | 6.0  |
| Colsubsidio                                                    | -    | -    | 0.3  | 3.2  | 5.7  | 6.0  |
| Comfamiliar Huila                                              | -    | -    | 0.3  | 1.3  | 2.9  | 5.4  |
| Cajacopi                                                       | 1.4  | 0.0  | 2.4  | 3.3  | 3.2  | 5.3  |
| Selvasalud                                                     | 0.8  | 1.0  | 1.6  | 2.3  | 4.3  | 5.3  |
| Comfaboy                                                       | -    | -    | 0.2  | 0.8  | 2.9  | 5.2  |
| Cafam                                                          | 1.0  | 2.1  | 2.0  | 2.4  | 11.4 | 4.8  |
| Asociación Mutual Ser                                          | 0.6  | 1.2  | 1.4  | 1.4  | 2.3  | 4.6  |
| Comparta                                                       | 1.1  | 1.3  | 1.7  | 1.8  | 2.5  | 4.3  |
| Cafaba                                                         | 1.8  | 0.7  | 1.5  | 1.9  | 1.8  | 3.9  |
| Comfamiliar Cartagena                                          | 0.6  | 1.0  | 0.7  | 0.6  | 2.5  | 3.8  |
| Convida                                                        | 0.6  | 0.5  | 1.9  | 1.5  | 2.3  | 3.7  |
| Caja de Compensación del Caquetá                               | -    | -    | 0.2  | 0.0  | 1.4  | 3.7  |
| Comfasucre                                                     | -    | -    | 0.6  | 0.3  | 2.7  | 1.7  |
| Manexka                                                        | 0.3  | 1.1  | 2.7  | 0.3  | 0.5  | 1.6  |
| Asociación Mutual Barrios Unidos de Quibdó                     | 0.9  | 0.8  | 1.1  | 0.9  | 1.2  | 1.5  |
| Asociación Indígena del Cauca                                  | 0.1  | 0.3  | 0.2  | 0.9  | 1.4  | 1.3  |
| Capresoca                                                      | -    | -    | -    | 0.9  | 0.8  | 1.2  |
| Comfamiliar de la Guajira                                      | -    | -    | 0.1  | 0.1  | 1.1  | 1.2  |
| Asociación de Cabildos Indígenas del Cesar "Dasakawi"          | 0.1  | 0.1  | 0.1  | 0.6  | 0.6  | 1.2  |
| Anas Wayuu EPS indígena                                        | 0.0  | 0.4  | 0.8  | 0.5  | 0.9  | 0.7  |

### 3.2.1.5.4. Entes territoriales

Las tutelas contra los entes territoriales se incrementaron, en comparación con el año 2007, pasando del 13.6% al 15.2%. Las secretarías de salud departamentales, distritales y municipales son las entidades más tuteladas, con una participación del 93.6% en el último año. (*Tabla N° 16*).

Esta Defensoría considera que la tendencia a interponer tutelas en contra de los entes territoriales se va a incrementar considerablemente con la aplicación de la Resolución 5334 de 2008<sup>2</sup>, que establece la responsabilidad de estas en materia de atención de los servicios de salud no POS-S, según lo expresado por los departamentos en distintos pronunciamientos, ya que los dineros asignados por el Sistema General de Participaciones para cubrir estos servicios no son suficientes, lo que ocasionaría su negación y en consecuencia la interposición de tutelas.

**TABLA N° 16.**

| TUTELAS EN SALUD CONTRA ENTES TERRITORIALES |               |              |               |              |               |              |               |              |
|---------------------------------------------|---------------|--------------|---------------|--------------|---------------|--------------|---------------|--------------|
|                                             | PERÍODO       |              |               |              |               |              |               |              |
|                                             | 2006          |              | 2007          |              | 2008          |              | Total         |              |
|                                             | N° Tutelas    | Part. %      |
| Secretarías de Salud / Direcciones de salud | 11.718        | 89,0         | 13.331        | 91,4         | 20.283        | 93,6         | 45.332        | 91,7         |
| Alcaldías                                   | 979           | 7,4          | 852           | 5,8          | 889           | 4,1          | 2.720         | 5,5          |
| Gobernaciones                               | 473           | 3,6          | 397           | 2,7          | 503           | 2,3          | 1.373         | 2,8          |
| <b>Total</b>                                | <b>13.170</b> | <b>100,0</b> | <b>14.580</b> | <b>100,0</b> | <b>21.675</b> | <b>100,0</b> | <b>49.425</b> | <b>100,0</b> |

### 3.2.1.5.5. Instituciones Prestadoras de Salud (IPS)

Entre las Instituciones Prestadoras de Salud, la más tutelada fue la Fundación Médico Preventiva, con un 16.4% de participación (*Tabla N° 17*), seguida de Cosmitet, con 10.3%. Estas entidades se caracterizan por contratar por capitación y por prestar servicios al magisterio, especialmente en los departamentos de Valle, Cauca, Nariño, Risaralda, Caldas y Quindío.

<sup>2</sup> Ministerio de la Protección Social. Resolución 5334 de 2008: "Por medio de la cual se adoptan los mecanismos que permitan agilizar los trámites requeridos para la atención en salud de los eventos no incluidos en el Plan Obligatorio de Salud del régimen subsidiado - no POS-S de los afiliados al régimen subsidiado, por parte de las entidades departamentales, distritales y municipales certificadas en salud".



TABLA N° 17.

| TUTELAS CONTRA CLÍNICAS, HOSPITALES Y OTRAS IPS    |              |              |              |              |              |              |              |              |
|----------------------------------------------------|--------------|--------------|--------------|--------------|--------------|--------------|--------------|--------------|
|                                                    | PERÍODO      |              |              |              |              |              |              |              |
|                                                    | 2006         |              | 2007         |              | 2008         |              | Total        |              |
|                                                    | N° Tutelas   | Part. %      |
| Fundación Médico Preventiva                        | 219          | 10.4         | 357          | 13.5         | 798          | 22.1         | 1.374        | 16.4         |
| Cosmitet                                           | 244          | 11.6         | 248          | 9.4          | 365          | 10.1         | 857          | 10.3         |
| ESE Liquidadas                                     | 145          | 6.9          | 182          | 6.9          | 122          | 3.4          | 449          | 5.4          |
| Hospital Universitario del Valle                   | 74           | 3.5          | 138          | 5.2          | 163          | 4.5          | 375          | 4.5          |
| Hospital San Jorge de Pereira                      | 92           | 4.4          | 72           | 2.7          | 97           | 2.7          | 261          | 3.1          |
| Hospital Federico Lleras Acosta                    | 62           | 2.9          | 72           | 2.7          | 96           | 2.7          | 230          | 2.8          |
| Clínica General del Norte/Unión Temporal del Norte | 37           | 1.8          | 58           | 2.2          | 81           | 2.2          | 176          | 2.1          |
| Avanzar Médico                                     | 23           | 1.1          | 78           | 3.0          | 75           | 2.1          | 176          | 2.1          |
| Hospital Universitario de Santander                | 36           | 1.7          | 59           | 2.2          | 65           | 1.8          | 160          | 1.9          |
| Hospital Hernando Moncaleano                       | 32           | 1.5          | 62           | 2.3          | 57           | 1.6          | 151          | 1.8          |
| Hospital Erasmo Meoz                               | 38           | 1.8          | 51           | 1.9          | 62           | 1.7          | 151          | 1.8          |
| Hospital Militar                                   | 23           | 1.1          | 46           | 1.7          | 52           | 1.4          | 121          | 1.4          |
| Instituto Nacional de Cancerología                 | 35           | 1.7          | 41           | 1.6          | 41           | 1.1          | 117          | 1.4          |
| Comfandi                                           | 27           | 1.3          | 20           | 0.8          | 53           | 1.5          | 100          | 1.2          |
| Clínica Cambell                                    | 4            | 0.2          | 25           | 0.9          | 60           | 1.7          | 89           | 1.1          |
| Mejor Salud                                        | 23           | 1.1          | 53           | 2.0          | 2            | 0.1          | 78           | 0.9          |
| Colombiana de Salud                                | 16           | 0.8          | 27           | 1.0          | 34           | 0.9          | 77           | 0.9          |
| Emcosalud                                          | 17           | 0.8          | 26           | 1.0          | 27           | 0.7          | 70           | 0.8          |
| Hospital San Juan de Dios de Armenia               | 11           | 0.5          | 25           | 0.9          | 33           | 0.9          | 69           | 0.8          |
| Médicos Asociados                                  | 18           | 0.9          | 15           | 0.6          | 30           | 0.8          | 63           | 0.8          |
| Servir S. A.                                       | 15           | 0.7          | 15           | 0.6          | 25           | 0.7          | 55           | 0.7          |
| Hospital de Kennedy                                | 20           | 1.0          | 19           | 0.7          | 15           | 0.4          | 54           | 0.6          |
| Hospital San Vicente de Paul                       | 13           | 0.6          | 24           | 0.9          | 16           | 0.4          | 53           | 0.6          |
| Hospital Simón Bolívar                             | 16           | 0.8          | 14           | 0.5          | 19           | 0.5          | 49           | 0.6          |
| Hospital El Tunal                                  | 14           | 0.7          | 17           | 0.6          | 16           | 0.4          | 47           | 0.6          |
| Clínica las Peñitas                                | 14           | 0.7          | 12           | 0.5          | 18           | 0.5          | 44           | 0.5          |
| Hospital Departamental de Villavicencio            | 19           | 0.9          | 14           | 0.5          | 11           | 0.3          | 44           | 0.5          |
| Hospital San Rafael de Girardot                    | 10           | 0.5          | 10           | 0.4          | 24           | 0.7          | 44           | 0.5          |
| Hospital Pablo Tobón Uribe                         | 6            | 0.3          | 20           | 0.8          | 16           | 0.4          | 42           | 0.5          |
| Unión Temporal Sur Colombiana                      | 16           | 0.8          | 9            | 0.3          | 14           | 0.4          | 39           | 0.5          |
| Clínica de Manizales                               | 2            | 0.1          | 14           | 0.5          | 20           | 0.6          | 36           | 0.4          |
| Hospital Santa Clara                               | 8            | 0.4          | 15           | 0.6          | 12           | 0.3          | 35           | 0.4          |
| Servimédicos                                       | 14           | 0.7          | 11           | 0.4          | 10           | 0.3          | 35           | 0.4          |
| Proinsalud                                         | 7            | 0.3          | 13           | 0.5          | 14           | 0.4          | 34           | 0.4          |
| Hospital San José de Popayán                       | 11           | 0.5          | 7            | 0.3          | 15           | 0.4          | 33           | 0.4          |
| Hospital Siquitríco San Camilo                     | 15           | 0.7          | 3            | 0.1          | 6            | 0.2          | 24           | 0.3          |
| Hospital Naval de Cartagena                        | 7            | 0.3          | 5            | 0.2          | 7            | 0.2          | 19           | 0.2          |
| UT Medicol                                         | 4            | 0.2          | 2            | 0.1          | 8            | 0.2          | 14           | 0.2          |
| Clínica San Pedro Claver                           | 3            | 0.1          | 4            | 0.2          | 6            | 0.2          | 13           | 0.2          |
| Hospital de Caldas                                 | 7            | 0.3          | 0            | 0.0          | 2            | 0.1          | 9            | 0.1          |
| Clínica las Américas                               | 2            | 0.1          | 3            | 0.1          | 3            | 0.1          | 8            | 0.1          |
| Hospital Universitario de Barranquilla             | 3            | 0.1          | 3            | 0.1          | 1            | 0.0          | 7            | 0.1          |
| Clínica de Occidente                               | 0            | 0.0          | 4            | 0.2          | 2            | 0.1          | 6            | 0.1          |
| Otras IPS                                          | 703          | 33.4         | 750          | 28.4         | 1.012        | 28.1         | 2.465        | 29.5         |
| <b>Total</b>                                       | <b>2.105</b> | <b>100,0</b> | <b>2.643</b> | <b>100,0</b> | <b>3.605</b> | <b>100,0</b> | <b>8.353</b> | <b>100,0</b> |

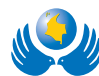

### 3.2.1.5.6. Entidades del Estado

Aunque las tutelas en contra de las entidades del Estado son poco frecuentes (1.5%), hay que destacar que en el año 2008 cerca de la mitad de ellas fueron interpuestas contra Acción Social, entidad creada por el Gobierno Nacional con el fin de canalizar los recursos nacionales e internacionales para ejecutar todos los programas sociales que dependen de la Presidencia de la República y que atienden a poblaciones vulnerables afectadas por la pobreza, el narcotráfico y la violencia.

### 3.2.1.5.7. INPEC/penitenciarías

Hasta el año 2008, un promedio de 1.000 tutelas anuales se interponían en contra del INPEC o directamente contra las penitenciarías para reclamar servicios de salud. (*Tabla N°18*). Con la expedición del Decreto 1141 de 2009, que reglamentó la afiliación al Sistema General de Seguridad Social en Salud de la población reclusa en los establecimientos a cargo del INPEC, ya sea que se encuentre en prisión, detención domiciliaria o bajo un sistema de vigilancia electrónica, se espera que a esta población se le garantice el derecho a la salud y no tenga que recurrir a la tutela para la exigencia de servicios.

Según dicho decreto, la afiliación de esta población se hará al régimen subsidiado mediante subsidio total, a través de una Empresa Promotora de Salud de naturaleza pública del orden nacional. Dicha empresa deberá garantizar la prestación de servicios de salud en función del plan de beneficios, teniendo en cuenta las condiciones de seguridad requeridas por dicha población, para lo cual deberá coordinar lo pertinente con el INPEC.



TABLA N° 18.

| TUTELAS CONTRA EL INPEC, SEGÚN PENITENCIARIAS |               |              |               |              |               |              |               |              |
|-----------------------------------------------|---------------|--------------|---------------|--------------|---------------|--------------|---------------|--------------|
|                                               | PERÍODO       |              |               |              |               |              |               |              |
|                                               | 2006          |              | 2007          |              | 2008          |              | Total         |              |
|                                               | N°<br>Tutelas | Part. %      | N°<br>Tutelas | Part. %      | N°<br>Tutelas | Part. %      | N°<br>Tutelas | Part %       |
| INPEC*                                        | 225           | 25,3         | 264           | 30,3         | 371           | 35,5         | 860           | 30,7         |
| Cárcel Doña Juana de La Dorada                | 108           | 12,1         | 88            | 10,1         | 74            | 7,1          | 270           | 9,6          |
| Penitenciaría de Acacias                      | 64            | 7,2          | 66            | 7,6          | 118           | 11,3         | 248           | 8,8          |
| Penitenciaría Nacional de Valledupar          | 79            | 8,9          | 103           | 11,8         | 64            | 6,1          | 246           | 8,8          |
| Cárcel Palogordo de Girón                     | 93            | 10,4         | 81            | 9,3          | 60            | 5,7          | 234           | 8,3          |
| Cárcel de San Isidro de Popayán               | 58            | 6,5          | 43            | 4,9          | 57            | 5,5          | 158           | 5,6          |
| Cárcel de Cóbbita                             | 56            | 6,3          | 46            | 5,3          | 41            | 3,9          | 143           | 5,1          |
| Cárcel El Barne                               | 43            | 4,8          | 26            | 3,0          | 46            | 4,4          | 115           | 4,1          |
| Cárcel de Bellavista de Medellín              | 23            | 2,6          | 13            | 1,5          | 20            | 1,9          | 56            | 2,0          |
| Cárcel de Varones de Manizales                | 11            | 1,2          | 9             | 1,0          | 27            | 2,6          | 47            | 1,7          |
| Penitenciaría La Picota                       | 17            | 1,9          | 11            | 1,3          | 13            | 1,2          | 41            | 1,5          |
| Cárcel Nacional Modelo                        | 13            | 1,5          | 10            | 1,1          | 6             | 0,6          | 29            | 1,0          |
| Cárcel Picafeña                               | 13            | 1,5          | 5             | 0,6          | 9             | 0,9          | 27            | 1,0          |
| Cárcel de Villahermosa                        | 11            | 1,2          | 8             | 0,9          | 5             | 0,5          | 24            | 0,9          |
| Cárcel de Neiva                               | 0             | 0,0          | 7             | 0,8          | 10            | 1,0          | 17            | 0,6          |
| Cárcel Modelo de Cúcuta                       | 2             | 0,2          | 3             | 0,3          | 3             | 0,3          | 8             | 0,3          |
| Cárcel de las Mercedes de Montería            | 2             | 0,2          | 4             | 0,5          | 1             | 0,1          | 7             | 0,2          |
| Penitenciaría Nacional El Bosque              | 1             | 0,1          | 2             | 0,2          | 0             | 0,0          | 3             | 0,1          |
| Otras penitenciarías                          | 71            | 8,0          | 81            | 9,3          | 119           | 11,4         | 271           | 9,7          |
| <b>Total</b>                                  | <b>890</b>    | <b>100,0</b> | <b>870</b>    | <b>100,0</b> | <b>1.044</b>  | <b>100,0</b> | <b>2.804</b>  | <b>100,0</b> |

\* No se especifica penitenciaría

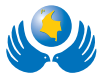

El mayor número de tutelas se registra en las penitenciarías de Caldas (16%), Santander (13.8%) y Boyacá (12%), justamente regiones donde se encuentran las de máxima seguridad. Es de anotar que Santander, en comparación con el anterior estudio, tuvo un aumento significativo, ya que pasó del 6.7% al 13.8%. (Tabla N° 19).

TABLA N° 19.

| TUTELAS CONTRA EL INPEC Y PENITENCIARIAS SEGÚN DEPARTAMENTO<br>Período 2006 - 2008 |            |              |            |              |              |              |              |              |
|------------------------------------------------------------------------------------|------------|--------------|------------|--------------|--------------|--------------|--------------|--------------|
|                                                                                    | PERÍODO    |              |            |              |              |              |              |              |
|                                                                                    | 2006       |              | 2007       |              | 2008         |              | Total        |              |
|                                                                                    | N° Tutelas | Part. %      | N° Tutelas | Part. %      | N° Tutelas   | Part. %      | N° Tutelas   | Part. %      |
| Caldas                                                                             | 171        | 19,2         | 136        | 15,6         | 147          | 14,1         | 454          | 16,2         |
| Santander                                                                          | 125        | 14,0         | 124        | 14,3         | 138          | 13,2         | 387          | 13,8         |
| Boyacá                                                                             | 126        | 14,2         | 92         | 10,6         | 118          | 11,3         | 336          | 12,0         |
| Meta                                                                               | 70         | 7,9          | 76         | 8,7          | 144          | 13,8         | 290          | 10,3         |
| Cesár                                                                              | 85         | 9,6          | 116        | 13,3         | 75           | 7,2          | 276          | 9,8          |
| Bogotá D. C.                                                                       | 76         | 8,5          | 73         | 8,4          | 64           | 6,1          | 213          | 7,6          |
| Cauca                                                                              | 63         | 7,1          | 60         | 6,9          | 80           | 7,7          | 203          | 7,2          |
| Antioquia                                                                          | 56         | 6,3          | 48         | 5,5          | 74           | 7,1          | 178          | 6,3          |
| Huila                                                                              | 22         | 2,5          | 34         | 3,9          | 32           | 3,1          | 88           | 3,1          |
| Valle                                                                              | 23         | 2,6          | 20         | 2,3          | 32           | 3,1          | 75           | 2,7          |
| Tolima                                                                             | 20         | 2,2          | 18         | 2,1          | 27           | 2,6          | 65           | 2,3          |
| Quindío                                                                            | 13         | 1,5          | 16         | 1,8          | 29           | 2,8          | 58           | 2,1          |
| Norte de Santander                                                                 | 4          | 0,4          | 13         | 1,5          | 22           | 2,1          | 39           | 1,4          |
| Risaralda                                                                          | 10         | 1,1          | 10         | 1,1          | 16           | 1,5          | 36           | 1,3          |
| Cundinamarca                                                                       | 4          | 0,4          | 9          | 1,0          | 17           | 1,6          | 30           | 1,1          |
| Caquetá                                                                            | 4          | 0,4          | 3          | 0,3          | 10           | 1,0          | 17           | 0,6          |
| Atlántico                                                                          | 5          | 0,6          | 5          | 0,6          | 5            | 0,5          | 15           | 0,5          |
| Nariño                                                                             | 1          | 0,1          | 4          | 0,5          | 7            | 0,7          | 12           | 0,4          |
| Bolívar                                                                            | 2          | 0,2          | 6          | 0,7          | 3            | 0,3          | 11           | 0,4          |
| Córdoba                                                                            | 2          | 0,2          | 4          | 0,5          | 1            | 0,1          | 7            | 0,2          |
| Magdalena                                                                          | 3          | 0,3          | 0          | 0,0          | 2            | 0,2          | 5            | 0,2          |
| Chocó                                                                              | 1          | 0,1          | 1          | 0,1          | 1            | 0,1          | 3            | 0,1          |
| Arauca                                                                             | 2          | 0,2          | 0          | 0,0          | 0            | 0,0          | 2            | 0,1          |
| Sucre                                                                              | 2          | 0,2          | 0          | 0,0          | 0            | 0,0          | 2            | 0,1          |
| Putumayo                                                                           | 0          | 0,0          | 1          | 0,1          | 0            | 0,0          | 1            | 0,0          |
| Casanare                                                                           | 0          | 0,0          | 1          | 0,1          | 0            | 0,0          | 1            | 0,0          |
| <b>Total</b>                                                                       | <b>890</b> | <b>100,0</b> | <b>870</b> | <b>100,0</b> | <b>1.044</b> | <b>100,0</b> | <b>2.804</b> | <b>100,0</b> |



### 3.2.1.5.8. Regímenes de excepción

En esta clasificación el magisterio fue excluido, por cuanto la mayoría de las tutelas que interponen los docentes van directamente contra las IPS que les prestan servicios, como son los casos de Cosmitet y Fundación Médica Preventiva, entre otros.

Las fuerzas militares y de policía concentran el mayor número de tutelas en este ítem, acorde con la población que cubre. (*Tabla N° 20*).

TABLA N° 20.

| TUTELAS EN SALUD CONTRA ENTIDADES CON RÉGIMEN ESPECIAL * |            |         |            |         |            |         |            |         |
|----------------------------------------------------------|------------|---------|------------|---------|------------|---------|------------|---------|
|                                                          | PERÍODO    |         |            |         |            |         |            |         |
|                                                          | 2006       |         | 2007       |         | 2008       |         | Total      |         |
|                                                          | N° Tutelas | Part. % |
| Fuerzas Militares y de policía                           | 664        | 96,4    | 801        | 97,2    | 961        | 95,4    | 2.426      | 96,3    |
| Ecopetrol                                                | 25         | 3,6     | 23         | 2,8     | 46         | 4,6     | 94         | 3,7     |
| Total                                                    | 689        | 100,0   | 824        | 100,0   | 1.007      | 100,0   | 2.520      | 100,0   |

### 3.2.1.5.9. Otras entidades

Los motivos frecuentes de interposición de tutelas contra este tipo de entidades tienen que ver con reclamaciones de pensión de invalidez, evaluación de incapacidades de origen laboral, exclusiones de pólizas y complementación de los servicios SOAT, entre otros.

De las compañías de seguros se destaca La Previsora Vida con el mayor número de tutelas en su contra (16.6%), entidad que presta servicios de ARP, SOAT y pólizas de salud. (*Tabla N° 21*).

TABLA N° 21.

| TUTELAS EN SALUD CONTRA ARP Y COMPAÑÍAS DE SEGUROS |            |              |            |              |            |              |              |              |
|----------------------------------------------------|------------|--------------|------------|--------------|------------|--------------|--------------|--------------|
|                                                    | PERÍODO    |              |            |              |            |              |              |              |
|                                                    | 2006       |              | 2007       |              | 2008       |              | Total        |              |
|                                                    | N° Tutelas | Part. %      | N° Tutelas | Part. %      | N° Tutelas | Part. %      | N° Tutelas   | Part. %      |
| La Previsora Vida S.A. Seguro Social               | 70         | 20,3         | 74         | 18,9         | 53         | 11,8         | 197          | 16,6         |
| Compañía de Seguros Colmena                        | 47         | 13,6         | 55         | 14,1         | 72         | 16,0         | 174          | 14,7         |
| Suratep                                            | 37         | 10,7         | 41         | 10,5         | 69         | 15,4         | 147          | 12,4         |
| Compañía de Seguros Bolívar                        | 41         | 11,9         | 43         | 11,0         | 54         | 12,0         | 138          | 11,6         |
| Seguros de Vida Colpatria                          | 32         | 9,3          | 38         | 9,7          | 51         | 11,4         | 121          | 10,2         |
| Liberty Seguros                                    | 20         | 5,8          | 25         | 6,4          | 23         | 5,1          | 68           | 5,7          |
| Suramericana de Seguros                            | 12         | 3,5          | 20         | 5,1          | 23         | 5,1          | 55           | 4,6          |
| Aseguradora Colseguros                             | 14         | 4,1          | 23         | 5,9          | 18         | 4,0          | 55           | 4,6          |
| La Equidad Seguros de Vida                         | 18         | 5,2          | 14         | 3,6          | 21         | 4,7          | 53           | 4,5          |
| Compañía Agrícola de Seguros                       | 10         | 2,9          | 21         | 5,4          | 13         | 2,9          | 44           | 3,7          |
| Seguros del Estado S.A.                            | 12         | 3,5          | 11         | 2,8          | 16         | 3,6          | 39           | 3,3          |
| Seguros Aurora                                     | 3          | 0,9          | 4          | 1,0          | 4          | 0,9          | 11           | 0,9          |
| Seguros de Vida Alfa                               | 2          | 0,6          | 0          | 0,0          | 6          | 1,3          | 8            | 0,7          |
| Otras compañías de seguros                         | 27         | 7,8          | 22         | 5,6          | 26         | 5,8          | 75           | 6,3          |
| <b>Total</b>                                       | <b>345</b> | <b>100,0</b> | <b>391</b> | <b>100,0</b> | <b>449</b> | <b>100,0</b> | <b>1.185</b> | <b>100,0</b> |

### 3.2.2. ANÁLISIS DE LOS HECHOS DE LA TUTELA EN SALUD

Esta parte del estudio comprende el análisis de 6.164 tutelas seleccionadas a través de una muestra estratificada por año y departamento. Los resultados se presentan utilizando un factor de expansión en función de las mismas variables.

El análisis se centró en los hechos narrados por los tutelantes, clasificando sus pretensiones más recurrentes y si estas se encontraban dentro del plan de beneficios en las entidades que administran los regímenes contributivo y subsidiado.



### 3.2.2.1. Contenidos más frecuentes en las tutelas interpuestas

Revisadas las pretensiones de los accionantes en cada una de las tutelas, se encontró que la mayoría de ellos hacen más de un requerimiento, por lo que en una misma tutela se podrían encontrar solicitudes para exámenes, medicamentos, cirugías, etc.

En el período analizado, las cirugías fueron las solicitudes más frecuentes, desplazando a los exámenes paraclínicos, que en el estudio anterior eran los más requeridos. Cerca del 20.8% de todas las solicitudes correspondió a cirugías, seguidas de medicamentos y exámenes paraclínicos. (Tabla N° 22). (Gráfica N° 3).

TABLA N° 22.

| CONTENIDO MÁS FRECUENTE EN LAS TUTELAS INTERPUESTAS |                |              |                |              |                |              |                |              |
|-----------------------------------------------------|----------------|--------------|----------------|--------------|----------------|--------------|----------------|--------------|
|                                                     | PERÍODO        |              |                |              |                |              |                |              |
|                                                     | 2006           |              | 2007           |              | 2008           |              | Total          |              |
|                                                     | Solicitudes    | Part. %      |
| Cirugías                                            | 26.741         | 19,7         | 25.841         | 20,8         | 35.288         | 21,7         | 87.870         | 20,8         |
| Medicamentos                                        | 25.078         | 18,5         | 25.961         | 20,9         | 30.025         | 18,4         | 81.065         | 19,2         |
| Exámenes paraclínicos                               | 25.086         | 18,5         | 23.220         | 18,7         | 30.541         | 18,8         | 78.847         | 18,6         |
| Prótesis y órtesis                                  | 14.491         | 10,7         | 17.841         | 14,3         | 25.569         | 15,7         | 57.901         | 13,7         |
| Citas médicas                                       | 11.579         | 8,5          | 11.935         | 9,6          | 20.340         | 12,5         | 43.854         | 10,4         |
| Tratamientos                                        | 15.147         | 11,2         | 7.786          | 6,3          | 8.707          | 5,3          | 31.641         | 7,5          |
| Procedimientos                                      | 2.994          | 2,2          | 2.258          | 1,8          | 2.717          | 1,7          | 7.968          | 1,9          |
| Otras relacionadas con el sistema                   | 10.190         | 7,5          | 6.401          | 5,1          | 5.897          | 3,6          | 22.488         | 5,3          |
| Otras                                               | 4.252          | 3,1          | 3.234          | 2,6          | 3.709          | 2,3          | 11.195         | 2,6          |
| <b>Total</b>                                        | <b>135.557</b> | <b>100,0</b> | <b>124.477</b> | <b>100,0</b> | <b>162.795</b> | <b>100,0</b> | <b>422.829</b> | <b>100,0</b> |

GRÁFICA N° 3. CONTENIDO DE LAS TUTELAS EN SALUD.

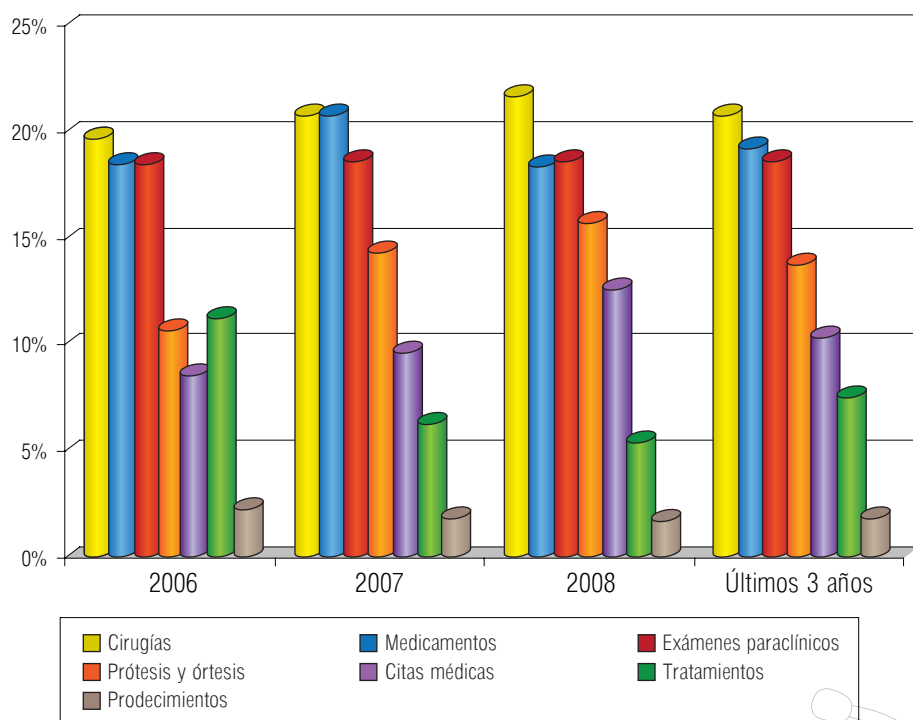

### 3.2.2.2. Tutelas para exigir contenidos del POS en los regímenes contributivo y subsidiado

En el análisis, cada una de las solicitudes de las tutelas fue clasificada como POS o no POS de acuerdo con la Resolución 5261 de 2004, todos los acuerdos que la complementan, los conceptos expedidos por el Ministerio de la Protección Social y el Ministerio de Hacienda, y demás normas en materia de promoción y prevención. (Anexo N° 2).

Durante el período analizado se encontró que el 53.4% de las solicitudes tuvieron que ver con servicios que se encuentran dentro del POS, de las cuales el 85.5% corresponde al régimen contributivo. Sin embargo, estas negaciones POS han disminuido desde el año 2006, hasta descender al 49.3% en el año 2008, debido en gran parte a la implementación de las guías y modelos de atención en enfermedades como VIH/sida e insuficiencia renal crónica. (Gráfica N° 4).

GRÁFICA N° 4. CONTENIDOS POS EN LAS TUTELAS.

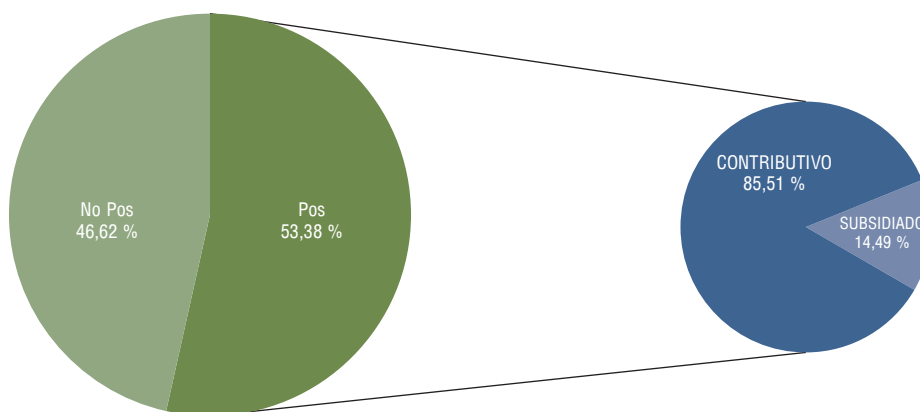

Las mayores negaciones de los contenidos del POS por parte de las EPS son cirugías y citas médicas especializadas. Entre las solicitudes no POS encontramos también las cirugías y los medicamentos. (Tabla N° 23).

TABLA N° 23.

| CONTENIDO DE LAS TUTELAS (POS Y NO POS) EN LOS RÉGIMENES CONTRIBUTIVO Y SUBSIDIADO |             |         |             |         |             |         |             |         |
|------------------------------------------------------------------------------------|-------------|---------|-------------|---------|-------------|---------|-------------|---------|
|                                                                                    | 2006        |         | 2007        |         | 2008        |         | Total       |         |
|                                                                                    | Solicitudes | Part. % |
| Pos                                                                                | 76.719      | 60,9    | 60.178      | 50,7    | 75.774      | 49,3    | 212.671     | 53,4    |
| No Pos                                                                             | 49.275      | 39,1    | 58.480      | 49,3    | 77.956      | 50,7    | 185.711     | 46,6    |
| Total                                                                              | 125.994     | 100,0   | 118.658     | 100,0   | 153.730     | 100,0   | 398.382     | 100,0   |

Las negaciones POS son más recurrentes en el régimen contributivo (Tabla N° 24), ocasionado por procedimientos, cirugías, medicamentos, etc., que, según las EPS, en algunos casos se encuentran dentro de las denominadas “zonas grises”, las cuales, según concepto del Ministerio de la Protección Social<sup>3</sup> en virtud del principio de la integralidad, no existirían dentro del POS.

3 Ministerio de la Protección Social. Dirección General de Gestión de la Demanda en Salud. Concepto de fecha 13 de julio de 2007.

Hay que destacar que en el régimen subsidiado el POS-S es más limitado, inequidad que la Honorable Corte Constitucional en sentencia T-760 de 2008, tendió a remediar al solicitar su unificación a la Comisión de Regulación en Salud (Cres). Por esta razón en este régimen se presentan más solicitudes no POS .

TABLA N° 24.

| TUTELAS EN SALUD SEGÚN RÉGIMEN<br>PERÍODO 2006-2008 |              |         |             |         |             |         |
|-----------------------------------------------------|--------------|---------|-------------|---------|-------------|---------|
|                                                     | Régimen      |         |             |         |             |         |
|                                                     | Contributivo |         | Subsidiado  |         | Total       |         |
|                                                     | Solicitudes  | Part. % | Solicitudes | Part. % | Solicitudes | Part. % |
| Pos                                                 | 181.865      | 58,6    | 30.806      | 35,0    | 212.671     | 53,4    |
| No Pos                                              | 128.555      | 41,4    | 57.156      | 65,0    | 185.711     | 46,6    |
| Total                                               | 310.420      | 100.0   | 87.962      | 100.0   | 398.382     | 100.0   |

### 3.2.2.3. Desarrollo del contenido más frecuente de las tutelas interpuestas

#### 3.2.2.3.1. Tutelas por cirugías

Las cirugías más solicitadas son las de oftalmología, gastroenterología, cardiología, oncología y ortopedia. En el caso de oftalmología, los requerimientos más frecuentes se relacionan con cirugías para la corrección de cataratas, asociadas al implante de lente intraocular y la facoemulsificación. En cuanto a gastroenterología, tienen que ver con el baipás gástrico, cirugías bariátricas (balón gástrico y cinta gástrica) y colecistectomías. (Tabla N° 25).

En cardiología, las solicitudes más recurrentes son las angioplastias coronarias con cateterismos cardiacos. En oncología, resecciones de tumores. En ortopedia, cirugías de cadera y rodilla, y en otorrinolaringología, el implante coclear.



TABLA N° 25.

| ESPECIALIDADES EN LAS QUE SE SOLICITAN CIRUGÍAS |               |              |               |              |               |              |               |              |
|-------------------------------------------------|---------------|--------------|---------------|--------------|---------------|--------------|---------------|--------------|
|                                                 | PERÍODO       |              |               |              |               |              |               |              |
|                                                 | 2006          |              | 2007          |              | 2008          |              | Total         |              |
|                                                 | Solicitudes   | Part. %      |
| Oftalmología                                    | 3.681         | 13,8         | 5.013         | 19,4         | 6.819         | 19,3         | 15.513        | 17,7         |
| Gastroenterología                               | 2.567         | 9,6          | 4.291         | 16,6         | 6.010         | 17,0         | 12.868        | 14,6         |
| Cardiología                                     | 3.642         | 13,6         | 2.543         | 9,8          | 4.226         | 12,0         | 10.411        | 11,8         |
| Oncología                                       | 2.829         | 10,6         | 2.903         | 11,2         | 3.293         | 9,3          | 9.025         | 10,3         |
| Ortopedia                                       | 2.804         | 10,5         | 2.647         | 10,2         | 2.509         | 7,1          | 7.960         | 9,1          |
| Otorrinolaringología                            | 1.474         | 5,5          | 1.205         | 4,7          | 1.928         | 5,5          | 4.607         | 5,2          |
| Urología                                        | 1.105         | 4,1          | 628           | 2,4          | 1.713         | 4,9          | 3.445         | 3,9          |
| Cirugía general                                 | 1.934         | 7,2          | 455           | 1,8          | 995           | 2,8          | 3.384         | 3,9          |
| Gineco-obstetricia                              | 901           | 3,4          | 927           | 3,6          | 1.308         | 3,7          | 3.135         | 3,6          |
| Cirugía plástica                                | 989           | 3,7          | 719           | 2,8          | 1.403         | 4,0          | 3.112         | 3,5          |
| Vascular                                        | 620           | 2,3          | 1.056         | 4,1          | 1.086         | 3,1          | 2.762         | 3,1          |
| Neurología                                      | 751           | 2,8          | 870           | 3,4          | 889           | 2,5          | 2.510         | 2,9          |
| Nefrología                                      | 810           | 3,0          | 743           | 2,9          | 656           | 1,9          | 2.210         | 2,5          |
| Medicina interna                                | 568           | 2,1          | 231           | ,9           | 755           | 2,1          | 1.555         | 1,8          |
| Neurocirugía                                    | 630           | 2,4          | 532           | 2,1          | 356           | 1,0          | 1.518         | 1,7          |
| Odontología                                     | 326           | 1,2          | 533           | 2,1          | 353           | 1,0          | 1.211         | 1,4          |
| Endocrinología                                  | 338           | 1,3          | 278           | 1,1          | 144           | ,4           | 760           | ,9           |
| Neumología                                      | 0             | ,0           | 118           | ,5           | 325           | ,9           | 443           | ,5           |
| Reumatología                                    | 134           | ,5           | 0             | ,0           | 134           | ,4           | 268           | ,3           |
| Dermatología                                    | 62            | ,2           | 115           | ,4           | 56            | ,2           | 233           | ,3           |
| Hematología                                     | 82            | ,3           | 0             | ,0           | 151           | ,4           | 233           | ,3           |
| Multiespecialidad                               | 91            | ,3           | 0             | ,0           | 92            | ,3           | 183           | ,2           |
| Psiquiatría                                     | 91            | ,3           | 0             | ,0           | 0             | ,0           | 91            | ,1           |
| Proctología                                     | 0             | ,0           | 0             | ,0           | 44            | ,1           | 44            | ,1           |
| Medicina general                                | 0             | ,0           | 0             | ,0           | 44            | ,1           | 44            | ,1           |
| Otras/no específicas                            | 310           | 1,2          | 33            | ,1           | 0             | ,0           | 343           | ,4           |
| <b>Total</b>                                    | <b>26.741</b> | <b>100,0</b> | <b>25.841</b> | <b>100,0</b> | <b>35.288</b> | <b>100,0</b> | <b>87.870</b> | <b>100,0</b> |

### 3.2.2.3.1.1. Tutelas por cirugías en los regímenes contributivo y subsidiado

El 74.8% de las solicitudes por cirugías están dentro del POS; de estas, el 88.5% corresponde al régimen contributivo (*Tabla N° 26*)(*Gráfica N° 5*). Las principales negaciones son aquellas cirugías que requieren insumos o aditamentos adicionales para su realización, tales como la corrección de cataratas, los implantes de stent y, en ortopedia, las que requieren reemplazos articulares y material de osteosíntesis. Adicionalmente, las negaciones en colecistectomías por laparoscopia (técnica que garantiza una mejor calidad de vida, es menos invasiva y tiene menor tiempo de incapacidad), la cual es negada por las EPS a pesar de haber sido incluida en el POS según el Acuerdo 313 de 2005.

**GRÁFICA N° 5. CONTENIDOS POS EN CIRUGÍAS.**

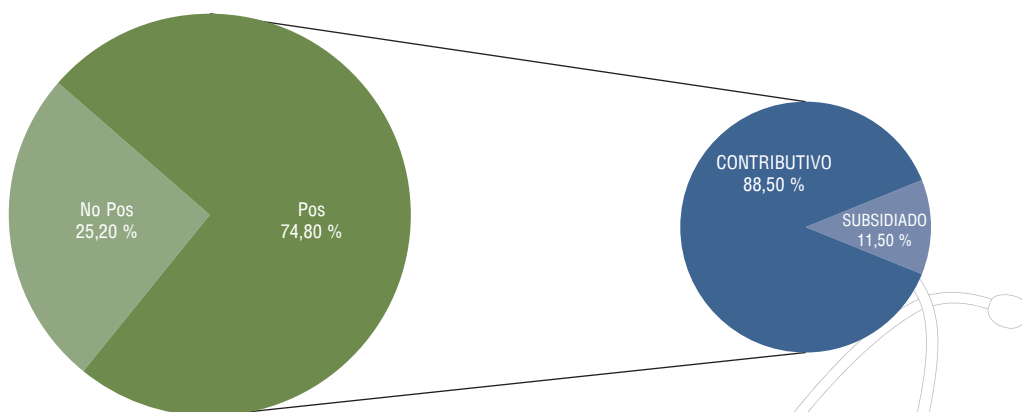

En el caso de las negaciones no POS que ocupan el 25.2% (*Tabla N° 27*) encontramos el baipás gástrico como la cirugía más solicitada, debido al auge que este tipo de cirugía bariátrica (cirugía para adelgazar) ha tenido en los últimos años. Es considerada una opción que actualmente trata la obesidad excesiva con eficacia en las personas en las que han fracasado medidas más conservadoras como la dieta, el ejercicio y los medicamentos, las cuales se encuentran en la norma técnica para atención de obesidad, que hace parte de las actividades de promoción y prevención.



TABLA N° 26.

| CONTENIDO DE LAS TUTELAS POR CIRUGÍAS (POS Y NO POS)<br>EN RÉGIMENES CONTRIBUTIVO Y SUBSIDIADO |             |         |             |         |             |         |             |         |
|------------------------------------------------------------------------------------------------|-------------|---------|-------------|---------|-------------|---------|-------------|---------|
|                                                                                                | 2006        |         | 2007        |         | 2008        |         | Total       |         |
|                                                                                                | Solicitudes | Part. % |
| Pos                                                                                            | 17.715      | 79,9    | 17.233      | 75,4    | 21.341      | 70,6    | 56.289      | 74,8    |
| No Pos                                                                                         | 4.459       | 20,1    | 5.628       | 24,6    | 8.875       | 29,4    | 18.962      | 25,2    |
| Total                                                                                          | 22.174      | 100,0   | 22.861      | 100,0   | 30.216      | 100,0   | 75.251      | 100,0   |

En el caso del régimen subsidiado, las mayores negaciones se dan en cirugías que no se encuentran en el POS-S, ocasionadas por la limitación de este plan en la atención de segundo y tercer nivel.

TABLA N° 27.

| TUTELAS EN CIRUGÍAS SEGÚN RÉGIMEN - PERÍODO 2006-2008 |              |         |             |         |             |         |
|-------------------------------------------------------|--------------|---------|-------------|---------|-------------|---------|
|                                                       | Régimen      |         |             |         |             |         |
|                                                       | Contributivo |         | Subsidiado  |         | Total       |         |
|                                                       | Solicitudes  | Part. % | Solicitudes | Part. % | Solicitudes | Part. % |
| Pos                                                   | 49.831       | 81,1    | 6.458       | 46,7    | 56.289      | 74,8    |
| No Pos                                                | 11.583       | 18,9    | 7.379       | 53,3    | 18.962      | 25,2    |
| Total                                                 | 61.414       | 100,0   | 13.837      | 100,0   | 75.251      | 100,0   |

### 3.2.2.3.2. Tutelas por medicamentos

Los medicamentos más solicitados están relacionados con neurología, oncología, cardiología, reumatología y oftalmología, en su mayoría prescritos con el nombre genérico, aunque varios incluyen marca. (Tabla N° 28). Los medicamentos más pedidos son: en neurología, los anticonvulsivantes para tratamientos de epilepsia, tales como el ácido valproico y la carbamazepina; para demencias, la amantadina y memantina y la toxina botulínica en los casos de espasticidad. En oncología, el acetato de leuprolide, bicalutamida, imatinib y ondasetron. En cardiología, el clopidogrel y antihipertensivos de última generación, como el valsartan, irbesartan y el telmisartan.

En reumatología se destaca el incremento de las solicitudes de medicamentos como los alendronatos, la glucosamina y los biológicos (adalimumab, fliximab y rituximab), los cuales son costosos, pero mejoran la calidad de vida. En oftalmología, dorsolamida – timolol, latanoprost y diclofenaco oftálmico. Cabe destacar que el éxito de la mayoría de las cirugías en esta especialidad depende del uso de colirios posoperatorios, los cuales son onerosos en general y no están incluidos en el POS.

Adicionalmente, se resalta la persistencia de tutelas por la hormona de crecimiento, solicitud de nuevas tecnologías en insulina para el tratamiento de la diabetes y de complementos nutricionales.

TABLA N° 28.

| ESPECIALIDADES EN LAS QUE SE SOLICITAN MEDICAMENTOS |               |               |               |               |               |               |               |               |
|-----------------------------------------------------|---------------|---------------|---------------|---------------|---------------|---------------|---------------|---------------|
|                                                     | PERÍODO       |               |               |               |               |               |               |               |
|                                                     | 2006          |               | 2007          |               | 2008          |               | Total         |               |
|                                                     | Solicitudes   | Part. %       |
| Neurología                                          | 3.976         | 15,86         | 3.499         | 13,48         | 4.693         | 15,63         | 12.169        | 15,01         |
| Oncología                                           | 2.940         | 11,72         | 2.475         | 9,53          | 1.979         | 6,59          | 7.394         | 9,12          |
| Cardiología                                         | 2.392         | 9,54          | 1.911         | 7,36          | 2.689         | 8,96          | 6.992         | 8,63          |
| Reumatología                                        | 1.268         | 5,05          | 2.128         | 8,20          | 2.135         | 7,11          | 5.530         | 6,82          |
| Oftalmología                                        | 1.460         | 5,82          | 1.836         | 7,07          | 1.809         | 6,02          | 5.104         | 6,30          |
| Ortopedia                                           | 1.527         | 6,09          | 1.517         | 5,84          | 1.708         | 5,69          | 4.752         | 5,86          |
| Medicina interna                                    | 1.416         | 5,64          | 1.675         | 6,45          | 1.342         | 4,47          | 4.432         | 5,47          |
| Endocrinología                                      | 1.236         | 4,93          | 1.498         | 5,77          | 1.696         | 5,65          | 4.430         | 5,47          |
| Neumología                                          | 808           | 3,22          | 1.444         | 5,56          | 1.763         | 5,87          | 4.015         | 4,95          |
| Psiquiatría                                         | 1.158         | 4,62          | 1.286         | 4,96          | 1.305         | 4,35          | 3.750         | 4,63          |
| Gastroenterología                                   | 923           | 3,68          | 1.241         | 4,78          | 1.312         | 4,37          | 3.476         | 4,29          |
| Urología                                            | 468           | 1,87          | 927           | 3,57          | 1.636         | 5,45          | 3.030         | 3,74          |
| Nefrología                                          | 857           | 3,42          | 616           | 2,37          | 828           | 2,76          | 2.301         | 2,84          |
| Vascular                                            | 556           | 2,22          | 467           | 1,80          | 1.143         | 3,81          | 2.166         | 2,67          |
| Dermatología                                        | 585           | 2,33          | 643           | 2,48          | 678           | 2,26          | 1.906         | 2,35          |
| Vih/Sida                                            | 979           | 3,90          | 408           | 1,57          | 320           | 1,07          | 1.707         | 2,11          |
| Otorrinolaringología                                | 408           | 1,63          | 399           | 1,54          | 455           | 1,52          | 1.262         | 1,56          |
| Gineco-obstetricia                                  | 402           | 1,60          | 465           | 1,79          | 246           | 0,82          | 1.112         | 1,37          |
| Medicina general                                    | 345           | 1,38          | 304           | 1,17          | 457           | 1,52          | 1.105         | 1,36          |
| Hematología                                         | 248           | 0,99          | 233           | 0,90          | 572           | 1,90          | 1.052         | 1,30          |
| Multiespecialidad                                   | 95            | 0,38          | 352           | 1,36          | 560           | 1,86          | 1.007         | 1,24          |
| Neurocirugía                                        | 415           | 1,66          | 213           | 0,82          | 213           | 0,71          | 842           | 1,04          |
| Pediatría                                           | 86            | 0,34          | 243           | 0,94          | 277           | 0,92          | 606           | 0,75          |
| Cirugía general                                     | 131           | 0,52          | 0             | 0,00          | 112           | 0,37          | 243           | 0,30          |
| Cirugía plástica                                    | 214           | 0,85          | 0             | 0,00          | 0             | 0,00          | 214           | 0,26          |
| Odontología                                         | 0             | 0,00          | 59            | 0,23          | 0             | 0,00          | 59            | 0,07          |
| Otras/no específicas                                | 187           | 0,75          | 122           | 0,47          | 98            | 0,33          | 407           | 0,50          |
| <b>Total</b>                                        | <b>25.078</b> | <b>100,00</b> | <b>25.961</b> | <b>100,00</b> | <b>30.025</b> | <b>100,00</b> | <b>81.065</b> | <b>100,00</b> |

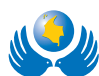

### 3.2.2.3.2.1. Tutelas por medicamentos en los regímenes contributivo y subsidiado

El 76.5% de las solicitudes de medicamentos se relaciona con aquellos que no están dentro del POS. De las solicitudes POS, el 51.6% corresponde al régimen contributivo (Tablas N° 29 y 30) (Gráfico N° 6), y los más solicitados son el ácido valproico, losartan, metoprolol y omeprazol.

GRÁFICA N° 6. CONTENIDOS POS EN MEDICAMENTOS.

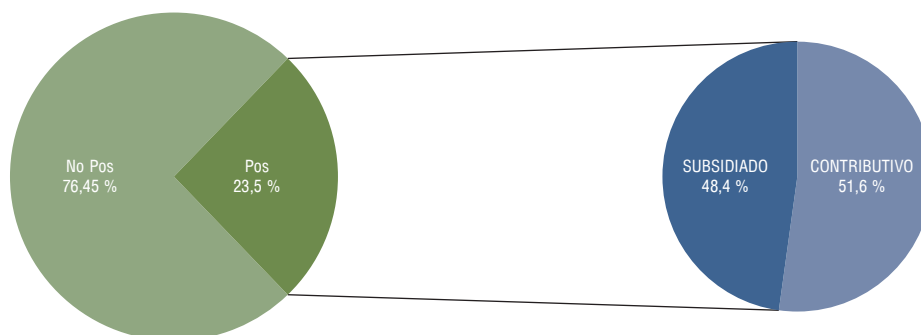

TABLA N° 29.

| CONTENIDO DE LAS TUTELAS POR MEDICAMENTOS (POS Y NO POS)<br>EN RÉGIMENES CONTRIBUTIVO Y SUBSIDIADO |             |         |             |         |             |         |             |         |
|----------------------------------------------------------------------------------------------------|-------------|---------|-------------|---------|-------------|---------|-------------|---------|
|                                                                                                    | 2006        |         | 2007        |         | 2008        |         | Total       |         |
|                                                                                                    | Solicitudes | Part. % |
| Pos                                                                                                | 12.139      | 33,1    | 6.519       | 18,4    | 7.720       | 19,3    | 26.378      | 23,5    |
| No Pos                                                                                             | 24.534      | 66,9    | 28.882      | 81,6    | 32.227      | 80,7    | 85.643      | 76,5    |
| Total                                                                                              | 36.673      | 100,0   | 35.401      | 100,0   | 39.947      | 100,0   | 112.021     | 100,0   |

En el caso del régimen subsidiado, los medicamentos POS-S con mayores negaciones son: enalapril, ácido fólico y ciclosporina. Negar de manera continua el enalapril (antihipertensivo) puede generar urgencias o emergencias hipertensivas que, en algunos casos, requieren

UCI, e incluso puede dar lugar a una enfermedad renal crónica, lo que ocasiona mayores gastos al sistema. El ácido fólico en los procesos de gestación es determinante, por cuanto se trata de un elemento esencial para la adecuada formación del tubo neural y por ende del sistema nervioso central del bebé.

TABLA N° 30.

| TUTELAS EN MEDICAMENTOS SEGÚN RÉGIMEN - PERÍODO 2006-2008 |               |              |               |              |                |              |
|-----------------------------------------------------------|---------------|--------------|---------------|--------------|----------------|--------------|
|                                                           | Régimen       |              |               |              |                |              |
|                                                           | Contributivo  |              | Subsidiado    |              | Total          |              |
|                                                           | Solicitudes   | Part. %      | Solicitudes   | Part. %      | Solicitudes    | Part. %      |
| Pos                                                       | 19.533        | 22,5         | 18.358        | 72,8         | 37.891         | 33,8         |
| No Pos                                                    | 67.285        | 77,5         | 6.845         | 27,2         | 74.130         | 66,2         |
| <b>Total</b>                                              | <b>86.818</b> | <b>100,0</b> | <b>25.203</b> | <b>100,0</b> | <b>112.021</b> | <b>100,0</b> |

### 3.2.2.3.3. Tutelas por exámenes paraclínicos

La mayoría de negaciones están asociadas a exámenes prequirúrgicos relacionados con neurología, cardiología, oncología, oftalmología y gastroenterología. (*Tabla N° 31*). Es de anotar la baja frecuencia de solicitudes para exámenes de VIH/sida y de pacientes renales, ocasionada por la adopción de las guías integrales de manejo de la enfermedad, a diferencia de años anteriores cuando sus requerimientos eran mayores.

En neurología encontramos las resonancias magnéticas, tomografías y polisomnografías. En cardiología, ecocardiogramas, estudios electrofisiológicos como el mapeo, la ablación y test de mesa basculante. En oncología, el estudio de citogenética, resonancias magnéticas y tomografías. En oftalmología, la angiografía, el campo visual y la tomografía óptica coherente. En gastroenterología, endoscopias, manometrías y colonoscopias.

Es de anotar el incremento en las tutelas relacionadas con el test cutáneo de alérgenos, las pruebas de anas y las arteriografías y ecografías; las últimas dos en todas las especialidades.



TABLA N° 31.

| ESPECIALIDADES EN LAS QUE SE SOLICITAN EXÁMENES PARACLÍNICOS |               |              |               |              |               |              |               |              |
|--------------------------------------------------------------|---------------|--------------|---------------|--------------|---------------|--------------|---------------|--------------|
|                                                              | PERÍODO       |              |               |              |               |              |               |              |
|                                                              | 2006          |              | 2007          |              | 2008          |              | Total         |              |
|                                                              | Solicitudes   | Part. %      |
| Neurología                                                   | 3.121         | 12,4         | 3.685         | 15,9         | 3.965         | 13,0         | 10.771        | 13,7         |
| Cardiología                                                  | 3.312         | 13,2         | 2.151         | 9,3          | 3.292         | 10,8         | 8.754         | 11,1         |
| Oncología                                                    | 2.776         | 11,1         | 2.300         | 9,9          | 3.141         | 10,3         | 8.217         | 10,4         |
| Oftalmología                                                 | 2.148         | 8,6          | 1.777         | 7,7          | 2.167         | 7,1          | 6.091         | 7,7          |
| Gastroenterología                                            | 1.343         | 5,4          | 2.326         | 10,0         | 2.242         | 7,3          | 5.911         | 7,5          |
| Ortopedia                                                    | 1.240         | 4,9          | 2.094         | 9,0          | 1.527         | 5,0          | 4.861         | 6,2          |
| Endocrinología                                               | 1.229         | 4,9          | 1.026         | 4,4          | 1.134         | 3,7          | 3.389         | 4,3          |
| Vascular                                                     | 779           | 3,1          | 919           | 4,0          | 1.389         | 4,5          | 3.087         | 3,9          |
| Otorrinolaringología                                         | 1.177         | 4,7          | 413           | 1,8          | 1.314         | 4,3          | 2.905         | 3,7          |
| Medicina interna                                             | 1.198         | 4,8          | 692           | 3,0          | 966           | 3,2          | 2.856         | 3,6          |
| Gineco-obstetricia                                           | 642           | 2,6          | 854           | 3,7          | 1.245         | 4,1          | 2.742         | 3,5          |
| Urología                                                     | 980           | 3,9          | 802           | 3,5          | 695           | 2,3          | 2.477         | 3,1          |
| Nefrología                                                   | 547           | 2,2          | 765           | 3,3          | 1.165         | 3,8          | 2.476         | 3,1          |
| Neumología                                                   | 315           | 1,3          | 882           | 3,8          | 1.277         | 4,2          | 2.474         | 3,1          |
| Cirugía general                                              | 978           | 3,9          | 219           | ,9           | 1.020         | 3,3          | 2.216         | 2,8          |
| Reumatología                                                 | 318           | 1,3          | 465           | 2,0          | 767           | 2,5          | 1.551         | 2,0          |
| Vih/sida                                                     | 726           | 2,9          | 288           | 1,2          | 233           | ,8           | 1.246         | 1,6          |
| Neurocirugía                                                 | 454           | 1,8          | 280           | 1,2          | 499           | 1,6          | 1.233         | 1,6          |
| Dermatología                                                 | 343           | 1,4          | 118           | ,5           | 590           | 1,9          | 1.051         | 1,3          |
| Hematología                                                  | 191           | ,8           | 183           | ,8           | 485           | 1,6          | 859           | 1,1          |
| Multiespecialidad                                            | 139           | ,6           | 265           | 1,1          | 353           | 1,2          | 757           | 1,0          |
| Psiquiatría                                                  | 214           | ,9           | 174           | ,8           | 240           | ,8           | 629           | ,8           |
| Medicina general                                             | 212           | ,8           | 0             | ,0           | 277           | ,9           | 489           | ,6           |
| Odontología                                                  | 42            | ,2           | 178           | ,8           | 58            | ,2           | 278           | ,4           |
| Inmunología                                                  | 0             | ,0           | 118           | ,5           | 104           | ,3           | 222           | ,3           |
| Pediatría                                                    | 91            | ,4           | 0             | ,0           | 112           | ,4           | 203           | ,3           |
| Proctología                                                  | 0             | ,0           | 59            | ,3           | 104           | ,3           | 163           | ,2           |
| Cirugía plástica                                             | 0             | ,0           | 70            | ,3           | 49            | ,2           | 120           | ,2           |
| Genética                                                     | 0             | ,0           | 0             | ,0           | 97            | ,3           | 97            | ,1           |
| Otras/no específicas                                         | 571           | 2,3          | 118           | ,5           | 34            | ,1           | 722           | ,9           |
| <b>Total</b>                                                 | <b>25.086</b> | <b>100,0</b> | <b>23.220</b> | <b>100,0</b> | <b>30.541</b> | <b>100,0</b> | <b>78.847</b> | <b>100,0</b> |

### 3.2.2.3.3.1. Tutelas por exámenes paraclínicos (POS y no POS) en los regímenes contributivo y subsidiado

El 62.6% de las solicitudes se relaciona con exámenes paraclínicos incluidos dentro del POS. De estas solicitudes, el 87% corresponde al régimen contributivo (*Tablas N° 32 y 33*). (*Gráfica N° 7*), y los más frecuentes son la resonancia nuclear magnética de cráneo y de columna y los TAC abdominales, de columna y cerebro. En cuanto a las solicitudes no POS encontramos: pruebas alérgicas, pruebas electrofisiológicas<sup>4</sup> (mapeo y ablación), test de mesa basculante y los cariotipos.

**GRÁFICA N° 7. CONTENIDOS POS EN EXÁMENES PARACLÍNICOS.**

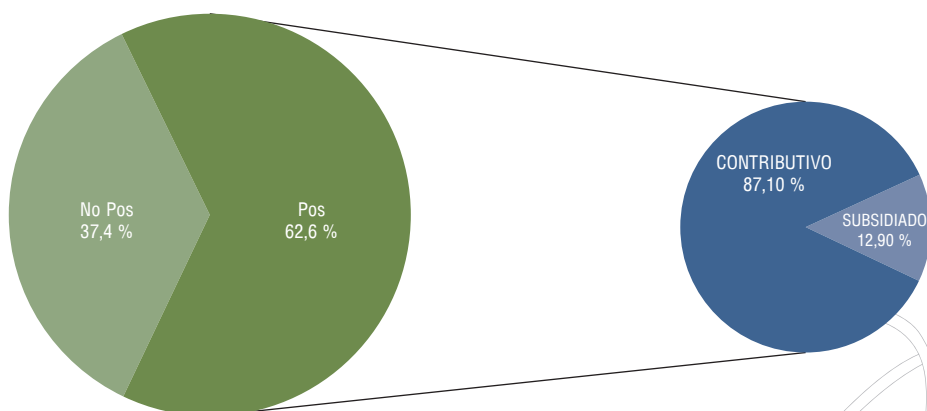

Igualmente, hay que destacar que todavía se solicitan exámenes básicos de diagnóstico, como los cuadros hemáticos, perfil lipídico (colesterol total, HDL, LDL y triglicéridos), y pruebas tiroideas, como TSH.

<sup>4</sup> Es un procedimiento que se realiza con el propósito de registrar la actividad y propagación del impulso eléctrico del corazón, lo que permite estudiar todo tipo de arritmias y garantiza oportunidad, diagnóstico y tratamiento adecuados, para evitar, inclusive, la muerte súbita. Junto con el mapeo y la ablación, son métodos de curación definitivos.



TABLA N° 32.

| CONTENIDO DE LAS TUTELAS POR EXÁMENES (POS Y NO POS)<br>EN RÉGIMENES CONTRIBUTIVO Y SUBSIDIADO |             |         |             |         |             |         |             |         |
|------------------------------------------------------------------------------------------------|-------------|---------|-------------|---------|-------------|---------|-------------|---------|
|                                                                                                | 2006        |         | 2007        |         | 2008        |         | Total       |         |
|                                                                                                | Solicitudes | Part. % |
| Pos                                                                                            | 21.100      | 70,7    | 16.062      | 62,4    | 19.615      | 55,9    | 56.777      | 62,6    |
| No Pos                                                                                         | 8.749       | 29,3    | 9.669       | 37,6    | 15.473      | 44,1    | 33.891      | 37,4    |
| Total                                                                                          | 29.849      | 100,0   | 25.731      | 100,0   | 35.088      | 100,0   | 90.668      | 100,0   |

En el caso del régimen subsidiado, los exámenes paraclínicos POS-S más negados son: el perfil lipídico, el perfil tiroideo y las ecografías. Como solicitudes no POS, las cuales están asociadas a diagnósticos que no hacen parte del POS-S, encontramos las tomografías, ecografías y resonancias magnéticas.

TABLA N° 33.

| TUTELAS EN EXÁMENES SEGÚN RÉGIMEN - PERÍODO 2006-2008 |              |         |             |         |             |         |
|-------------------------------------------------------|--------------|---------|-------------|---------|-------------|---------|
|                                                       | Régimen      |         |             |         |             |         |
|                                                       | Contributivo |         | Subsidiado  |         | Total       |         |
|                                                       | Solicitudes  | Part. % | Solicitudes | Part. % | Solicitudes | Part. % |
| Pos                                                   | 49.449       | 73,6    | 7.328       | 31,2    | 56.777      | 62,6    |
| No Pos                                                | 17.750       | 26,4    | 16.141      | 68,8    | 33.891      | 37,4    |
| Total                                                 | 67.199       | 100,0   | 23.469      | 100,0   | 90.668      | 100,0   |

### 3.2.2.3.4. Tutelas por prótesis y órtesis

La mayoría de negaciones están asociadas a prótesis y órtesis relacionadas con oftalmología, otorrinolaringología, cardiología, ortopedia y oncología. (Tabla N° 34). En oftalmología, más de la mitad de las negaciones tienen que ver con el lente intraocular y facoplegable para corrección de cataratas. En otorrinolaringología, audífonos e implante coclear. En cardiología, marcapasos, cardiodesfibrilador y los stent básico y medicalizado. En ortopedia,

las prótesis de rodilla y cadera, material de osteosíntesis y corsés. En oncología, bolsas de colostomía, stent esofágicos y sutura mecánica.

Muchas de estas tutelas solicitan insumos para manejo domiciliario, como guantes, gasas, jeringas, agujas, tiras de glucómetro, caminadores y bolsas de colostomía.

**TABLA N° 34.**

| ESPECIALIDADES EN LAS QUE SE SOLICITAN PRÓTESIS Y ÓRTESIS |               |              |               |              |               |              |               |              |
|-----------------------------------------------------------|---------------|--------------|---------------|--------------|---------------|--------------|---------------|--------------|
|                                                           | PERÍODO       |              |               |              |               |              |               |              |
|                                                           | 2006          |              | 2007          |              | 2008          |              | Total         |              |
|                                                           | Solicitudes   | Part. %      |
| Oftalmología                                              | 2.542         | 17,5         | 3.262         | 18,3         | 5.350         | 20,9         | 11.155        | 19,3         |
| Otorrinolaringología                                      | 2.073         | 14,3         | 2.432         | 13,6         | 4.431         | 17,3         | 8.937         | 15,4         |
| Cardiología                                               | 2.505         | 17,3         | 2.038         | 11,4         | 3.167         | 12,4         | 7.711         | 13,3         |
| Ortopedia                                                 | 2.134         | 14,7         | 2.771         | 15,5         | 2.740         | 10,7         | 7.644         | 13,2         |
| Oncología                                                 | 745           | 5,1          | 1.368         | 7,7          | 1.741         | 6,8          | 3.854         | 6,7          |
| Neurología                                                | 602           | 4,2          | 1.199         | 6,7          | 1.578         | 6,2          | 3.379         | 5,8          |
| Vascular                                                  | 412           | 2,8          | 755           | 4,2          | 825           | 3,2          | 1.993         | 3,4          |
| Gastroenterología                                         | 313           | 2,2          | 681           | 3,8          | 791           | 3,1          | 1.786         | 3,1          |
| Neumología                                                | 212           | 1,5          | 547           | 3,1          | 952           | 3,7          | 1.712         | 3,0          |
| Nefrología                                                | 684           | 4,7          | 586           | 3,3          | 318           | 1,2          | 1.587         | 2,7          |
| Urología                                                  | 123           | ,8           | 419           | 2,3          | 944           | 3,7          | 1.486         | 2,6          |
| Endocrinología                                            | 197           | 1,4          | 589           | 3,3          | 642           | 2,5          | 1.428         | 2,5          |
| Medicina interna                                          | 273           | 1,9          | 299           | 1,7          | 393           | 1,5          | 966           | 1,7          |
| Cirugía general                                           | 389           | 2,7          | 108           | ,6           | 361           | 1,4          | 857           | 1,5          |
| Neurocirugía                                              | 203           | 1,4          | 109           | ,6           | 262           | 1,0          | 575           | 1,0          |
| Cirugía plástica                                          | 457           | 3,2          | 0             | ,0           | 90            | ,4           | 547           | ,9           |
| Odontología                                               | 236           | 1,6          | 70            | ,4           | 202           | ,8           | 508           | ,9           |
| Gineco-obstetricia                                        | 0             | ,0           | 141           | ,8           | 266           | 1,0          | 407           | ,7           |
| Reumatología                                              | 197           | 1,4          | 70            | ,4           | 89            | ,3           | 356           | ,6           |
| Multiespecialidad                                         | 0             | ,0           | 43            | ,2           | 181           | ,7           | 224           | ,4           |
| Proctología                                               | 0             | ,0           | 70            | ,4           | 93            | ,4           | 164           | ,3           |
| Medicina general                                          | 8             | ,1           | 136           | ,8           | 0             | ,0           | 144           | ,2           |
| Hematología                                               | 0             | ,0           | 57            | ,3           | 48            | ,2           | 105           | ,2           |
| Pediatría                                                 | 0             | ,0           | 55            | ,3           | 0             | ,0           | 55            | ,1           |
| Vih/sida                                                  | 0             | ,0           | 0             | ,0           | 45            | ,2           | 45            | ,1           |
| Otras/no específicas                                      | 186           | 1,3          | 33            | ,2           | 60            | ,2           | 278           | ,5           |
| <b>Total</b>                                              | <b>14.491</b> | <b>100,0</b> | <b>17.841</b> | <b>100,0</b> | <b>25.569</b> | <b>100,0</b> | <b>57.901</b> | <b>100,0</b> |



### 3.2.2.3.4.1. Tutelas por prótesis y órtesis (POS y no POS) en los regímenes contributivo y subsidiado

El 48.2% de las solicitudes son prótesis y órtesis incluidas dentro del POS. De estas solicitudes, el 93.7% corresponde al régimen contributivo (*Tablas N° 35 y 36*) (*Gráfica N° 8*), y los más tutelados son el lente intraocular (lio), los facoplegables, el stent, los audífonos y las prótesis de rodilla y cadera. De igual forma, hay que mencionar que la falta de cultura de donación de órganos ocasiona largas listas de espera, lo que genera tutelas por trasplante, en especial los de riñón, cornéa, corazón e hígado.

GRÁFICA N° 8. CONTENIDOS POS EN PRÓTESIS Y ÓRTESIS.

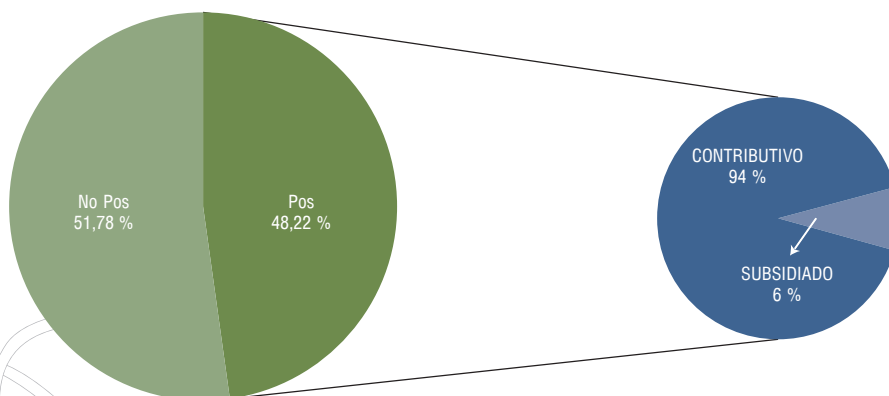

En cuanto a solicitudes no POS, encontramos los audífonos de tecnologías específicas, el implante coclear, prótesis con especificaciones especiales, stent medicalizados, sillas de ruedas, caminadores y tirillas para glucometría.

TABLA N° 35.

| CONTENIDO DE LAS TUTELAS POR PRÓTESIS Y ÓRTESIS (POS Y NO POS)<br>EN RÉGIMENES CONTRIBUTIVO Y SUBSIDIADO |             |         |             |         |             |         |             |         |
|----------------------------------------------------------------------------------------------------------|-------------|---------|-------------|---------|-------------|---------|-------------|---------|
|                                                                                                          | 2006        |         | 2007        |         | 2008        |         | Total       |         |
|                                                                                                          | Solicitudes | Part. % |
| Pos                                                                                                      | 7.322       | 52,8    | 9.086       | 47,4    | 12.223      | 46,4    | 28.631      | 48,2    |
| No Pos                                                                                                   | 6.557       | 47,2    | 10.087      | 52,6    | 14.096      | 53,6    | 30.740      | 51,8    |
| Total                                                                                                    | 13.879      | 100,0   | 19.173      | 100,0   | 26.319      | 100,0   | 59.371      | 100,0   |

En el caso del régimen subsidiado, al igual que en el contributivo, encontramos que las prótesis y órtesis POS-S más negadas son los lentes intraoculares, que ocupan cerca de la mitad de las negaciones, y los trasplantes de riñón. En lo no POS-S: audífonos, implante coclear, C-PAP, diferentes prótesis ortopédicas, stent medicados, stent esofágicos y el trasplante de hígado.

TABLA N° 36.

| TUTELAS EN PRÓTESIS Y ÓRTESIS SEGÚN RÉGIMEN - PERÍODO 2006-2008 |               |              |              |              |               |              |
|-----------------------------------------------------------------|---------------|--------------|--------------|--------------|---------------|--------------|
|                                                                 | Régimen       |              |              |              |               |              |
|                                                                 | Contributivo  |              | Subsidiado   |              | Total         |              |
|                                                                 | Solicitudes   | Part. %      | Solicitudes  | Part. %      | Solicitudes   | Part. %      |
| Pos                                                             | 26.847        | 51,6         | 1.784        | 24,2         | 28.631        | 48,2         |
| No Pos                                                          | 25.137        | 48,4         | 5.603        | 75,8         | 30.740        | 51,8         |
| <b>Total</b>                                                    | <b>51.984</b> | <b>100,0</b> | <b>7.387</b> | <b>100,0</b> | <b>59.371</b> | <b>100,0</b> |

### 3.2.2.3.5. Tutelas por citas médicas

En general, la escasez de recurso humano, la concentración de profesionales en las grandes urbes, la falta de oportunidad y aplazamiento en citas de espera y la contención de costos, especialmente cuando se detectan enfermedades ruinosas, son los principales motivos de negación en citas médicas especializadas, datos que coinciden con las restricciones manifestadas por los médicos en el estudio realizado por esta entidad en el año 2007<sup>5</sup>.

Las principales negaciones por citas médicas se presentan en medicina interna, seguida de neurología, oftalmología, gineco-obstetricia y cirugía general. (*Tabla N° 37*). En el caso de medicina interna, las negaciones surgen por el represamiento en la atención de pacientes que requieren servicios de subespecialidades, lo que hace que el médico internista tenga que suplirlas. Otra razón es la falta de recurso humano debido a la necesidad de estos de ampliar su formación en otras subespecialidades.

5 Defensoría del Pueblo. Autonomía médica y su relación con la prestación de servicios en salud. Bogotá D. C. 2007.



TABLA N° 37.

| CITAS SOLICITADAS EN LAS TUTELAS |               |              |               |              |               |              |               |              |
|----------------------------------|---------------|--------------|---------------|--------------|---------------|--------------|---------------|--------------|
|                                  | PERÍODO       |              |               |              |               |              |               |              |
|                                  | 2006          |              | 2007          |              | 2008          |              | Total         |              |
|                                  | Solicitudes   | Part. %      |
| Medicina interna                 | 1.093         | 9,4          | 810           | 6,8          | 2.463         | 12,1         | 4.366         | 10,0         |
| Neurología                       | 1.010         | 8,7          | 1.074         | 9,0          | 2.167         | 10,7         | 4.251         | 9,7          |
| Oftalmología                     | 811           | 7,0          | 1.325         | 11,1         | 2.099         | 10,3         | 4.235         | 9,7          |
| Gineco-obstetricia               | 618           | 5,3          | 1.217         | 10,2         | 1.478         | 7,3          | 3.313         | 7,6          |
| Cirugía general                  | 780           | 6,7          | 930           | 7,8          | 1.426         | 7,0          | 3.136         | 7,2          |
| Cardiología                      | 1.463         | 12,6         | 566           | 4,7          | 1.107         | 5,4          | 3.136         | 7,2          |
| Ortopedia                        | 1.050         | 9,1          | 789           | 6,6          | 819           | 4,0          | 2.658         | 6,1          |
| Otorrinolaringología             | 506           | 4,4          | 765           | 6,4          | 1.020         | 5,0          | 2.291         | 5,2          |
| Urología                         | 878           | 7,6          | 466           | 3,9          | 722           | 3,6          | 2.066         | 4,7          |
| Neuropsicología                  | 336           | 2,9          | 530           | 4,4          | 657           | 3,2          | 1.524         | 3,5          |
| Dermatología                     | 203           | 1,8          | 411           | 3,4          | 660           | 3,2          | 1.274         | 2,9          |
| Oncología                        | 280           | 2,4          | 344           | 2,9          | 514           | 2,5          | 1.138         | 2,6          |
| Reumatología                     | 152           | 1,3          | 184           | 1,5          | 651           | 3,2          | 986           | 2,2          |
| Psiquiatría                      | 208           | 1,8          | 183           | 1,5          | 494           | 2,4          | 885           | 2,0          |
| Odontología                      | 274           | 2,4          | 310           | 2,6          | 254           | 1,2          | 838           | 1,9          |
| Pediatría                        | 154           | 1,3          | 118           | 1,0          | 549           | 2,7          | 820           | 1,9          |
| Endocrinología                   | 329           | 2,8          | 166           | 1,4          | 297           | 1,5          | 791           | 1,8          |
| Gastroenterología                | 123           | 1,1          | 4             | ,0           | 527           | 2,6          | 654           | 1,5          |
| Nefrología                       | 141           | 1,2          | 168           | 1,4          | 271           | 1,3          | 579           | 1,3          |
| Neurocirugía                     | 74            | ,6           | 283           | 2,4          | 206           | 1,0          | 563           | 1,3          |
| Hematología                      | 0             | ,0           | 293           | 2,5          | 253           | 1,2          | 546           | 1,2          |
| Vascular                         | 152           | 1,3          | 118           | 1,0          | 269           | 1,3          | 539           | 1,2          |
| Anestesiología                   | 42            | ,4           | 57            | ,5           | 393           | 1,9          | 492           | 1,1          |
| Fisiatría                        | 91            | ,8           | 178           | 1,5          | 222           | 1,1          | 491           | 1,1          |
| Cirugía plástica                 | 0             | ,0           | 116           | 1,0          | 259           | 1,3          | 375           | ,9           |
| Junta de invalidez               | 254           | 2,2          | 59            | ,5           | 56            | ,3           | 370           | ,8           |
| Psicología                       | 71            | ,6           | 176           | 1,5          | 94            | ,5           | 340           | ,8           |
| Nutricionista                    | 202           | 1,7          | 0             | ,0           | 48            | ,2           | 250           | ,6           |
| Retinología                      | 42            | ,4           | 70            | ,6           | 101           | ,5           | 213           | ,5           |
| Neumología                       | 0             | ,0           | 75            | ,6           | 117           | ,6           | 193           | ,4           |
| Infectología                     | 153           | 1,3          | 0             | ,0           | 0             | ,0           | 153           | ,3           |
| Genética                         | 0             | ,0           | 49            | ,4           | 56            | ,3           | 105           | ,2           |
| Ortótica                         | 0             | ,0           | 57            | ,5           | 45            | ,2           | 102           | ,2           |
| Hemodinamia                      | 91            | ,8           | 0             | ,0           | 0             | ,0           | 91            | ,2           |
| Hepatología                      | 0             | ,0           | 43            | ,4           | 46            | ,2           | 88            | ,2           |
| <b>Total</b>                     | <b>11.579</b> | <b>100,0</b> | <b>11.935</b> | <b>100,0</b> | <b>20.340</b> | <b>100,0</b> | <b>43.854</b> | <b>100,0</b> |

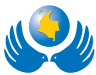

**3.2.2.3.5.1. Tutelas por citas médicas (POS y no POS) en los regímenes contributivo y subsidiado**

El 76.7% de las solicitudes por citas médicas está incluido dentro del POS (*Tablas N°38 y 39*). (*Gráfica N°9*). De estas, el 75% corresponde al régimen contributivo, y las más tuteladas son las de oftalmología, cardiología, medicina interna, neurología y ortopedia. En citas no POS se destaca la solicitud de citas de neurosicología, subespecialidad que a pesar de no ser médica es necesaria para el estudio de la organización cerebral de los procesos cognitivos, como la memoria, la atención y el lenguaje, entre otros, además del comportamiento y de sus alteraciones en caso de compromiso del sistema nervioso central.

**GRÁFICA N° 9. CONTENIDOS POS EN CITAS MÉDICAS.**

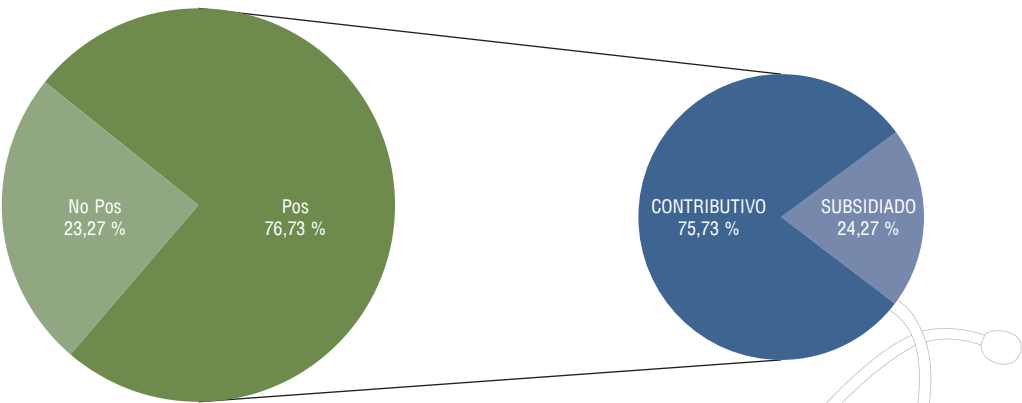

**TABLA N° 38.**

| CONTENIDO DE LAS TUTELAS POR CITAS MÉDICAS (POS Y NO POS)<br>EN RÉGIMENES CONTRIBUTIVO Y SUBSIDIADO |             |         |             |         |             |         |             |         |
|-----------------------------------------------------------------------------------------------------|-------------|---------|-------------|---------|-------------|---------|-------------|---------|
|                                                                                                     | 2006        |         | 2007        |         | 2008        |         | Total       |         |
|                                                                                                     | Solicitudes | Part. % |
| Pos                                                                                                 | 7.887       | 87,1    | 6.134       | 73,7    | 9.473       | 71,5    | 23.494      | 76,7    |
| No Pos                                                                                              | 1.173       | 12,9    | 2.187       | 26,3    | 3.767       | 28,5    | 7.127       | 23,3    |
| Total                                                                                               | 9.060       | 100,0   | 8.321       | 100,0   | 13.240      | 100,0   | 30.621      | 100,0   |



En el caso del régimen subsidiado, las citas médicas más solicitadas en el POS-S son medicina interna, cirugía general, ortopedia, cardiología y oftalmología; estas dos últimas solamente en lo incluido en el Acuerdo 306 de 2005. En cuanto a lo no POS-S, son las de neurología, otorrinolaringología, urología y dermatología.

TABLA N° 39.

| TUTELAS EN CITAS MÉDICAS SEGÚN RÉGIMEN<br>PERÍODO 2006-2008 |              |         |             |         |             |         |
|-------------------------------------------------------------|--------------|---------|-------------|---------|-------------|---------|
|                                                             | Régimen      |         |             |         |             |         |
|                                                             | Contributivo |         | Subsidiado  |         | Total       |         |
|                                                             | Solicitudes  | Part. % | Solicitudes | Part. % | Solicitudes | Part. % |
| Pos                                                         | 17.793       | 93,1    | 5.701       | 49,5    | 23.494      | 76,7    |
| No Pos                                                      | 1.309        | 6,9     | 5.818       | 50,5    | 7.127       | 23,3    |
| Total                                                       | 19.102       | 100,0   | 11.519      | 100,0   | 30.621      | 100,0   |

### 3.2.2.3.6. Tutelas por tratamientos

A pesar de que los usuarios solicitan cada uno de los servicios de manera separada, adicionalmente y para garantizar la atención completa de su enfermedad, en la mayoría de los casos piden que se les dé el tratamiento de manera integral, incluyendo hospitalizaciones a nivel general, como en la Unidad de Cuidados Intensivos (UCI).

Las principales negaciones por tratamientos se presentan en oncología, neurología, ortopedia, cardiología y oftalmología. (*Tabla N°40*). En oncología, lo más frecuente son las quimioterapias y radioterapias dirigidas a tratar tumores. En neurología, las terapias de lenguaje, físicas y ocupacionales de los pacientes con lesiones neurológicas. En ortopedia, las fisioterapias para el restablecimiento funcional de los miembros afectados. En cardiología, la rehabilitación cardiaca, y en oftalmología, las terapias fotodinámicas.

Las solicitudes por hospitalizaciones se presentan debido al problema existente en la mayoría de ciudades respecto de la falta de camas hospitalarias, lo que ocasiona que los usuarios soliciten a través de tutelas atención intrahospitalaria, especialmente en IPS especializadas o de mayor nivel de complejidad.

En cuanto al estudio anterior, las tutelas por tratamientos disminuyeron de manera significativa, en gran parte por la adopción de las guías de tratamiento y del modelo de atención en el caso de los pacientes con VIH/sida y de los pacientes renales y por el aumento de la UPC adicional para estos últimos.

TABLA N° 40.

| ESPECIALIDADES EN LAS QUE SE SOLICITAN TRATAMIENTOS |               |              |              |              |              |              |               |              |
|-----------------------------------------------------|---------------|--------------|--------------|--------------|--------------|--------------|---------------|--------------|
|                                                     | PERÍODO       |              |              |              |              |              |               |              |
|                                                     | 2006          |              | 2007         |              | 2008         |              | Total         |              |
|                                                     | Solicitudes   | Part. %      | Solicitudes  | Part. %      | Solicitudes  | Part. %      | Solicitudes   | Part. %      |
| Oncología                                           | 3.256         | 21,5         | 1.613        | 20,7         | 1.514        | 17,4         | 6.383         | 20,2         |
| Neurología                                          | 1.592         | 10,5         | 1.259        | 16,2         | 1.401        | 16,1         | 4.252         | 13,4         |
| Ortopedia                                           | 1.154         | 7,6          | 399          | 5,1          | 687          | 7,9          | 2.240         | 7,1          |
| Cardiología                                         | 1.007         | 6,6          | 351          | 4,5          | 377          | 4,3          | 1.736         | 5,5          |
| Oftalmología                                        | 1.008         | 6,7          | 221          | 2,8          | 308          | 3,5          | 1.537         | 4,9          |
| Psiquiatría                                         | 554           | 3,7          | 406          | 5,2          | 346          | 4,0          | 1.306         | 4,1          |
| Neumología                                          | 290           | 1,9          | 397          | 5,1          | 498          | 5,7          | 1.185         | 3,7          |
| Otorrinolaringología                                | 931           | 6,1          | 110          | 1,4          | 95           | 1,1          | 1.137         | 3,6          |
| Odontología                                         | 0             | ,0           | 249          | 3,2          | 823          | 9,5          | 1.072         | 3,4          |
| Gastroenterología                                   | 568           | 3,8          | 326          | 4,2          | 160          | 1,8          | 1.054         | 3,3          |
| Neurocirugía                                        | 398           | 2,6          | 221          | 2,8          | 395          | 4,5          | 1.014         | 3,2          |
| Vascular                                            | 329           | 2,2          | 288          | 3,7          | 365          | 4,2          | 982           | 3,1          |
| Endocrinología                                      | 563           | 3,7          | 189          | 2,4          | 141          | 1,6          | 894           | 2,8          |
| Nefrología                                          | 453           | 3,0          | 176          | 2,3          | 126          | 1,4          | 754           | 2,4          |
| Medicina interna                                    | 359           | 2,4          | 242          | 3,1          | 102          | 1,2          | 703           | 2,2          |
| Dermatología                                        | 61            | ,4           | 395          | 5,1          | 190          | 2,2          | 646           | 2,0          |
| Multiespecialidad                                   | 97            | ,6           | 151          | 1,9          | 387          | 4,4          | 635           | 2,0          |
| Cirugía general                                     | 274           | 1,8          | 166          | 2,1          | 195          | 2,2          | 635           | 2,0          |
| Vih/sida                                            | 205           | 1,4          | 114          | 1,5          | 248          | 2,8          | 567           | 1,8          |
| Gineco-obstetricia                                  | 403           | 2,7          | 115          | 1,5          | 45           | ,5           | 563           | 1,8          |
| Urología                                            | 388           | 2,6          | 108          | 1,4          | 44           | ,5           | 541           | 1,7          |
| Cirugía plástica                                    | 305           | 2,0          | 52           | ,7           | 60           | ,7           | 417           | 1,3          |
| Hematología                                         | 110           | ,7           | 53           | ,7           | 133          | 1,5          | 296           | ,9           |
| Reumatología                                        | 189           | 1,2          | 57           | ,7           | 21           | ,2           | 267           | ,8           |
| Medicina general                                    | 182           | 1,2          | 0            | ,0           | 0            | ,0           | 182           | ,6           |
| Infectología                                        | 62            | ,4           | 10           | ,1           | 0            | ,0           | 72            | ,2           |
| Proctología                                         | 0             | ,0           | 59           | ,8           | 0            | ,0           | 59            | ,2           |
| Pediatría                                           | 0             | ,0           | 57           | ,7           | 0            | ,0           | 57            | ,2           |
| Otras/no específicas                                | 413           | 2,7          | 0            | ,0           | 45           | ,5           | 457           | 1,4          |
| <b>Total</b>                                        | <b>15.147</b> | <b>100,0</b> | <b>7.786</b> | <b>100,0</b> | <b>8.707</b> | <b>100,0</b> | <b>31.641</b> | <b>100,0</b> |



### 3.2.2.3.6.1. Tutelas por tratamientos (POS y no POS) en los regímenes contributivo y subsidiado

El 66.9% de las solicitudes por tratamientos está incluido dentro del POS. (*Tablas N° 41 y 42*). (*Gráfica N°10*). De estas, el 86% corresponde al régimen contributivo, siendo el tratamiento oncológico el más tutelado, tanto en quimioterapias como en radioterapias, seguido de las terapias de rehabilitación, como la fisioterapia de lenguaje y la ocupacional. En tratamientos No POS se destacan las solicitudes odontológicas, debido a la limitación en los planes de beneficios (ortodoncias y periodoncias). Con el incremento del test de alérgenos se aumentaron las solicitudes de inmunoterapias destinadas a corregir dicho padecimiento.

TABLA N° 41.

| CONTENIDO DE LAS TUTELAS POR TRATAMIENTOS (POS Y NO POS)<br>EN RÉGIMENES CONTRIBUTIVO Y SUBSIDIADO |             |         |             |         |             |         |             |         |
|----------------------------------------------------------------------------------------------------|-------------|---------|-------------|---------|-------------|---------|-------------|---------|
|                                                                                                    | 2006        |         | 2007        |         | 2008        |         | Total       |         |
|                                                                                                    | Solicitudes | Part. % |
| Pos                                                                                                | 8.390       | 72,1    | 3.512       | 69,2    | 3.935       | 56,5    | 15.837      | 66,9    |
| No Pos                                                                                             | 3.254       | 27,9    | 1.562       | 30,8    | 3.027       | 43,5    | 7.843       | 33,1    |
| Total                                                                                              | 11.644      | 100,0   | 5.074       | 100,0   | 6.962       | 100,0   | 23.680      | 100,0   |

GRÁFICA N° 10. CONTENIDOS POS EN TRATAMIENTOS

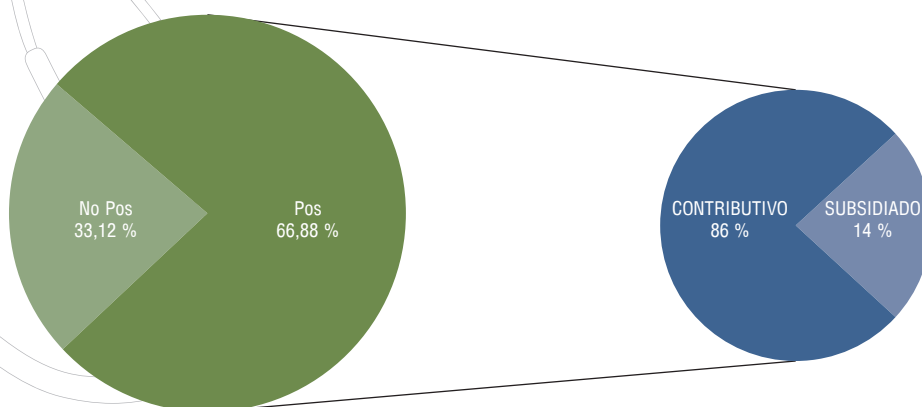

En el caso del régimen subsidiado, los tratamientos POS-S más solicitados son los oncológicos, debido a la falta de oportunidad en la atención en centros especializados. En cuanto a lo No POS-S, encontramos todo tipo de terapias.

TABLA N°42.

| TUTELAS EN TRATAMIENTOS SEGÚN RÉGIMEN<br>PERÍODO 2006-2008 |              |         |             |         |             |         |
|------------------------------------------------------------|--------------|---------|-------------|---------|-------------|---------|
|                                                            | Régimen      |         |             |         |             |         |
|                                                            | Contributivo |         | Subsidiado  |         | Total       |         |
|                                                            | Solicitudes  | Part. % | Solicitudes | Part. % | Solicitudes | Part. % |
| Pos                                                        | 13.618       | 74,9    | 2.219       | 40,3    | 15.837      | 66,9    |
| No Pos                                                     | 4.556        | 25,1    | 3.287       | 59,7    | 7.843       | 33,1    |
| Total                                                      | 18.174       | 100,0   | 5.506       | 100,0   | 23.680      | 100,0   |

### 3.2.2.3.7. Tutelas por procedimientos

Las principales negaciones por procedimientos se presentan en oncología, nefrología, cirugía general, neumología y oftalmología. (Tabla N° 43). En todas ellas, las biopsias son las más solicitadas. En nefrología, se acompañan por las hemodiálisis, las litotripcias extracorpóreas y las diálisis, especialmente la peritoneal. En oftalmología son recurrentes las inyecciones intravítreas.



TABLA N°43.

| ESPECIALIDADES EN LAS QUE SE SOLICITAN PROCEDIMIENTOS |              |              |              |              |              |              |              |              |
|-------------------------------------------------------|--------------|--------------|--------------|--------------|--------------|--------------|--------------|--------------|
|                                                       | PERÍODO      |              |              |              |              |              |              |              |
|                                                       | 2006         |              | 2007         |              | 2008         |              | Total        |              |
|                                                       | Solicitudes  | Part. %      |
| Oncología                                             | 307          | 10,3         | 780          | 34,5         | 636          | 23,4         | 1.723        | 21,6         |
| Nefrología                                            | 536          | 17,9         | 280          | 12,4         | 435          | 16,0         | 1.250        | 15,7         |
| Cirugía general                                       | 91           | 3,0          | 167          | 7,4          | 329          | 12,1         | 587          | 7,4          |
| Neumología                                            | 285          | 9,5          | 111          | 4,9          | 112          | 4,1          | 508          | 6,4          |
| Oftalmología                                          | 141          | 4,7          | 100          | 4,4          | 220          | 8,1          | 462          | 5,8          |
| Gineco-obstetricia                                    | 152          | 5,1          | 0            | ,0           | 262          | 9,6          | 414          | 5,2          |
| Dermatología                                          | 61           | 2,0          | 171          | 7,6          | 150          | 5,5          | 381          | 4,8          |
| Ortopedia                                             | 91           | 3,0          | 182          | 8,1          | 58           | 2,1          | 332          | 4,2          |
| Cardiología                                           | 123          | 4,1          | 59           | 2,6          | 93           | 3,4          | 276          | 3,5          |
| Vascular                                              | 94           | 3,1          | 118          | 5,2          | 56           | 2,1          | 269          | 3,4          |
| Gastroenterología                                     | 71           | 2,4          | 57           | 2,5          | 140          | 5,2          | 268          | 3,4          |
| Neurología                                            | 134          | 4,5          | 59           | 2,6          | 58           | 2,1          | 250          | 3,1          |
| Neurocirugía                                          | 225          | 7,5          | 0            | ,0           | 0            | ,0           | 225          | 2,8          |
| Odontología                                           | 91           | 3,0          | 57           | 2,5          | 56           | 2,1          | 204          | 2,6          |
| Endocrinología                                        | 162          | 5,4          | 0            | ,0           | 0            | ,0           | 162          | 2,0          |
| Otorrinolaringología                                  | 141          | 4,7          | 0            | ,0           | 0            | ,0           | 141          | 1,8          |
| Hematología                                           | 82           | 2,8          | 57           | 2,5          | 0            | ,0           | 140          | 1,8          |
| Cirugía plástica                                      | 82           | 2,8          | 0            | ,0           | 56           | 2,1          | 139          | 1,7          |
| Pediatría                                             | 62           | 2,1          | 0            | ,0           | 0            | ,0           | 62           | 0,8          |
| Infectología                                          | 62           | 2,1          | 0            | ,0           | 0            | ,0           | 62           | 0,8          |
| Urología                                              | 0            | ,0           | 58           | 2,6          | 0            | ,0           | 58           | 0,7          |
| Multiespecialidad                                     | 0            | ,0           | 0            | ,0           | 56           | 2,1          | 56           | 0,7          |
| <b>Total</b>                                          | <b>2.994</b> | <b>100,0</b> | <b>2.258</b> | <b>100,0</b> | <b>2.717</b> | <b>100,0</b> | <b>7.968</b> | <b>100,0</b> |

### 3.2.2.3.7.1. Tutelas por procedimientos en los regímenes contributivo y subsidiado

El 77.7% de las solicitudes por procedimientos está incluido dentro del POS. De estas, el 91% corresponde al régimen contributivo (Tablas N° 44 y 45) (Gráfica N° 11), y las más solicitadas son las biopsias, litotripcias extracorpóreas, diálisis peritoneal y hemodiálisis. En cuanto a lo no POS, como ya se mencionó, están las inyecciones intravítreas.

GRÁFICA N° 11. CONTENIDOS POS EN PROCEDIMIENTOS.

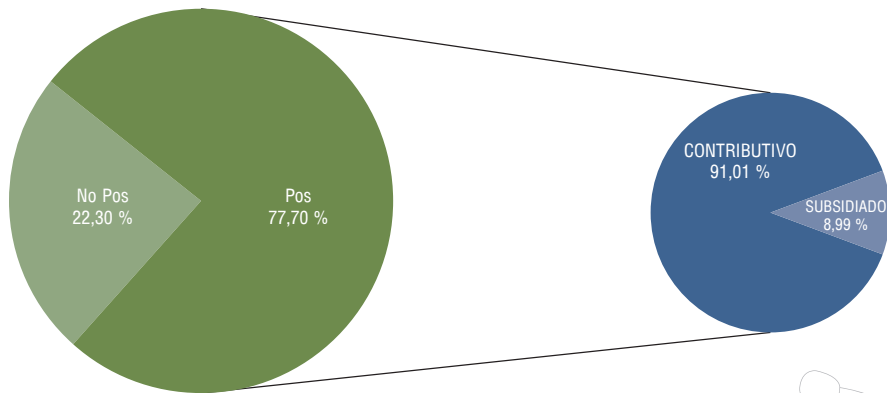

TABLA N° 44.

| CONTENIDO DE LAS TUTELAS POR PROCEDIMIENTOS (POS Y NO POS)<br>EN RÉGIMENES CONTRIBUTIVO Y SUBSIDIADO |             |         |             |         |             |         |             |         |
|------------------------------------------------------------------------------------------------------|-------------|---------|-------------|---------|-------------|---------|-------------|---------|
|                                                                                                      | 2006        |         | 2007        |         | 2008        |         | Total       |         |
|                                                                                                      | Solicitudes | Part. % |
| Pos                                                                                                  | 2.167       | 79,8    | 1.632       | 77,8    | 1.469       | 74,8    | 5.268       | 77,7    |
| No Pos                                                                                               | 550         | 20,2    | 467         | 22,2    | 495         | 25,2    | 1.512       | 22,3    |
| Total                                                                                                | 2.717       | 100,0   | 2.099       | 100,0   | 1.964       | 100,0   | 6.780       | 100,0   |

En el régimen subsidiado, los procedimientos POS-S más solicitados son las hemodiálisis y las litotripcias extracorpóreas. En lo no POS-S, las biopsias para establecer diagnósticos.



TABLA N° 45.

| TUTELAS EN PROCEDIMIENTOS SEGÚN RÉGIMEN - PERÍODO 2006-2008 |              |         |             |         |             |         |
|-------------------------------------------------------------|--------------|---------|-------------|---------|-------------|---------|
|                                                             | Régimen      |         |             |         |             |         |
|                                                             | Contributivo |         | Subsidiado  |         | Total       |         |
|                                                             | Solicitudes  | Part. % | Solicitudes | Part. % | Solicitudes | Part. % |
| Pos                                                         | 4.794        | 83,7    | 474         | 45,2    | 5.268       | 77,7    |
| No Pos                                                      | 937          | 16,3    | 575         | 54,8    | 1.512       | 22,3    |
| Total                                                       | 5.731        | 100,0   | 1.049       | 100,0   | 6.780       | 100,0   |

### 3.2.2.3.8. Tutelas por otras solicitudes relacionadas con el sistema

Incluye aquellas solicitudes por razones que, de alguna forma, les impiden a los usuarios tener acceso a los servicios en salud, bien sea por negligencia de los patronos en la afiliación o en el pago de los aportes, o porque las EPS niegan autorizaciones para gastos de transporte y alojamiento a familiares de los pacientes cuando estos tienen que ser trasladados de un lugar a otro para su atención.

La principal solicitud se presenta por atención médica, ocasionada por la negación en los servicios y la falta de oportunidad en esta. Le sigue el problema en afiliaciones ocasionado por la negación al usuario de trasladarse a otra EPS, situación reiterada en la extinguida EPS del Seguro Social. (Tabla N°46).

En los casos de tutela por pagos de la licencia de maternidad, la negación de las aseguradoras obedece a la no cotización durante todo el período de gestación. Al respecto, la Corte Constitucional en Sentencia 781 de 2008, hizo un llamado a las EPS para que se abstuvieran de dilatar o negar el pago de licencias. Según la Corte, las mujeres y en especial quienes están en gestación deben recibir especial asistencia y protección del Estado durante su embarazo y después del parto. La licencia de maternidad hace parte del mínimo vital, la cual está ligada al derecho fundamental a la subsistencia; por lo tanto, su no pago vulnera el derecho a la vida. Igualmente, la Corte aclaró que la interrupción en el pago de aportes no constituye causal para el no pago de la licencia de maternidad, razón por la cual esta entidad espera que, en un futuro, estas tutelas disminuyan. Igualmente, las tutelas por incapacidades surgen en casos de falta de pago oportuno de las cotizaciones.

Las solicitudes por transporte, alimentación y alojamiento se originan en aquellos eventos en que el paciente necesita atención médica en una ciudad distinta a la de su domicilio y se requiere cubrir estos gastos, tanto del paciente como de su acompañante.

TABLA N° 46.

| OTRAS SOLICITUDES RELACIONADAS CON EL SISTEMA |               |              |              |              |              |              |               |              |
|-----------------------------------------------|---------------|--------------|--------------|--------------|--------------|--------------|---------------|--------------|
|                                               | PERÍODO       |              |              |              |              |              |               |              |
|                                               | 2006          |              | 2007         |              | 2008         |              | Total         |              |
|                                               | Solicitudes   | Part. %      | Solicitudes  | Part. %      | Solicitudes  | Part. %      | Solicitudes   | Part. %      |
| Atención médica                               | 3.413         | 33,5         | 1.743        | 27,2         | 1.778        | 30,1         | 6.934         | 30,8         |
| Afiliaciones                                  | 1.449         | 14,2         | 2.138        | 33,4         | 919          | 15,6         | 4.505         | 20,0         |
| Pago de licencia de maternidad                | 1.587         | 15,6         | 1.393        | 21,8         | 1.110        | 18,8         | 4.089         | 18,2         |
| Pago de incapacidad                           | 722           | 7,1          | 515          | 8,0          | 774          | 13,1         | 2.010         | 8,9          |
| Transporte y alojamiento                      | 1.161         | 11,4         | 343          | 5,4          | 400          | 6,8          | 1.905         | 8,5          |
| Exoneración de copagos o cuotas moderadoras   | 750           | 7,4          | 53           | ,8           | 142          | 2,4          | 945           | 4,2          |
| Multiafiliación                               | 362           | 3,6          | 53           | ,8           | 382          | 6,5          | 797           | 3,5          |
| Reintegro por pagos médicos                   | 520           | 5,1          | 0            | ,0           | 201          | 3,4          | 722           | 3,2          |
| Pago de aportes a salud                       | 91            | ,9           | 163          | 2,5          | 0            | ,0           | 254           | 1,1          |
| Sisbén                                        | 135           | 1,3          | 0            | ,0           | 45           | ,8           | 180           | ,8           |
| No pago por PILA                              | 0             | ,0           | 0            | ,0           | 147          | 2,5          | 147           | ,7           |
| <b>Total</b>                                  | <b>10.190</b> | <b>100,0</b> | <b>6.401</b> | <b>100,0</b> | <b>5.897</b> | <b>100,0</b> | <b>22.488</b> | <b>100,0</b> |

### 3.2.2.3.9. Tutelas por otras solicitudes diferentes a salud

Estas solicitudes no involucran de manera directa la prestación de un servicio de salud; sin embargo, al realizar estas peticiones, los ciudadanos invocan la afectación de este derecho. Es así como la solicitud del reconocimiento de pensión registra el 50,5% de participación en el último año. (Tabla N°47).



TABLA N° 47.

| OTRAS SOLICITUDES DIFERENTES A SALUD |              |              |              |              |              |              |               |              |
|--------------------------------------|--------------|--------------|--------------|--------------|--------------|--------------|---------------|--------------|
|                                      | PERÍODO      |              |              |              |              |              |               |              |
|                                      | 2006         |              | 2007         |              | 2008         |              | Total         |              |
|                                      | Solicitudes  | Part. %      | Solicitudes  | Part. %      | Solicitudes  | Part. %      | Solicitudes   | Part. %      |
| Reconocimiento de pensión            | 1.723        | 40,5         | 885          | 27,4         | 1.872        | 50,5         | 4.480         | 40,0         |
| Ayuda humanitaria                    | 0            | ,0           | 0            | ,0           | 467          | 12,6         | 467           | 4,2          |
| Pago de prestaciones económicas      | 524          | 12,3         | 225          | 7,0          | 240          | 6,5          | 989           | 8,8          |
| Traslado laboral                     | 62           | 1,5          | 113          | 3,5          | 190          | 5,1          | 366           | 3,3          |
| Pago de salarios                     | 84           | 2,0          | 125          | 3,9          | 146          | 3,9          | 355           | 3,2          |
| Reintegro laboral                    | 234          | 5,5          | 183          | 5,7          | 56           | 1,5          | 473           | 4,2          |
| Servicios públicos                   | 128          | 3,0          | 443          | 13,7         | 50           | 1,3          | 620           | 5,5          |
| Auxilio económico                    | 134          | 3,2          | 362          | 11,2         | 49           | 1,3          | 545           | 4,9          |
| Medio ambiente y salubridad pública  | 226          | 5,3          | 59           | 1,8          | 38           | 1,0          | 324           | 2,9          |
| Pago de mesadas pensionales          | 440          | 10,3         | 115          | 3,5          | 0            | ,0           | 554           | 5,0          |
| Respuesta a derecho de petición      | 168          | 3,9          | 0            | ,0           | 0            | ,0           | 168           | 1,5          |
| Otros                                | 529          | 12,4         | 724          | 22,4         | 600          | 16,2         | 1.853         | 16,6         |
| <b>Total</b>                         | <b>4.252</b> | <b>100,0</b> | <b>3.234</b> | <b>100,0</b> | <b>3.709</b> | <b>100,0</b> | <b>11.195</b> | <b>100,0</b> |

## 4. NEGACIÓN DE SERVICIOS POR PARTE DE LAS EPS

La Corte Constitucional, mediante la sentencia T- 760 de 2008, reiteró el derecho a la salud como derecho fundamental, el cual goza de un núcleo esencial que debe ser garantizado por todas las personas. Ser fundamental comprende, entre otros, el derecho a acceder a los servicios en salud de manera oportuna, eficaz y con calidad.

Con esta sentencia se unificaron criterios y aspectos determinantes para la procedencia de la acción de tutela con el fin de proteger el derecho fundamental a la salud. En ella se estableció que a partir de dicha determinación, este es un derecho constitucional autónomo no solamente por guardar estrecha relación con los derechos a la vida, integridad personal y dignidad humana, sino porque en muchas oportunidades la parte actora tiene la calidad de sujeto especial de protección, gracias a que la salud es un derecho público amparado por la Carta Política, el bloque de constitucionalidad, la ley y los planes obligatorios de salud, y que su consagración como derecho autónomo está acorde con el desarrollo o evolución de su protección en el ámbito internacional.

Por ello, la Corte Constitucional estableció en dicha sentencia una serie de órdenes entre las cuales se encuentra la décimo novena, que les exige a las distintas entidades de aseguramiento enviar a la Defensoría del Pueblo la información trimestral de las negaciones de servicios realizadas a usuarios, hayan sido o no tramitadas por el Comité Técnico Científico.

A pesar de que algunas entidades no allegaron la información solicitada, esta entidad encontró que durante el último trimestre del año 2008 el total de negaciones ascendió a 129.124, las cuales, en su mayoría, pueden ser potenciales acciones de tutela.

Analizados los motivos que dieron las EPS para estas negaciones, se encontró que la mayoría de ellas se ajustan a la Resolución 3099 de 2008. Sin embargo, la Defensoría encuentra que dicha resolución hay que adecuarla a lo establecido en la sentencia T-760 de 2008 en cuanto a la garantía del acceso de los servicios en salud, a pesar de haber sido ajustada con las Resoluciones 3754 y 5334 de 2008, ya que sólo modificó artículos del capítulo II que hacen mención a procedimientos para los recobros. A continuación se presentan los resultados del primer informe de cumplimiento a la orden emanada por la Honorable Corte Constitucional.



## a) Negaciones en el régimen contributivo.

Del total de las negaciones, 10.339 corresponden a este régimen, de las cuales el 69.5% son negaciones realizadas por el CTC. Coomeva, Salud Total y Compensar encabezan el listado con 1936, 1774 y 1273, respectivamente. (Tabla N° 48).

TABLA N° 48.

| EPS QUE NEGARON SERVICIOS DE SALUD EN EL RÉGIMEN CONTRIBUTIVO EN EL PERÍODO OCTUBRE-DICIEMBRE DE 2008 |              |              |              |              |               |              |
|-------------------------------------------------------------------------------------------------------|--------------|--------------|--------------|--------------|---------------|--------------|
|                                                                                                       | CON CTC      |              | SIN CTC      |              | Total         |              |
|                                                                                                       | Negaciones   | Part. %      | Negaciones   | Part. %      | Negaciones    | Part. %      |
| Coomeva                                                                                               | 1.856        | 25,9         | 80           | 2,5          | 1.936         | 18,7         |
| Salud Total                                                                                           | 19           | ,3           | 1.755        | 55,5         | 1.774         | 17,2         |
| Compensar                                                                                             | 1.011        | 14,1         | 262          | 8,3          | 1.273         | 12,3         |
| Nueva EPS                                                                                             | 1.014        | 14,1         | 3            | ,1           | 1.017         | 9,8          |
| Susalud                                                                                               | 395          | 5,5          | 445          | 14,1         | 840           | 8,1          |
| Sánitas                                                                                               | 791          | 11,0         | 0            | ,0           | 791           | 7,7          |
| Comfenalco Antioquia                                                                                  | 262          | 3,6          | 400          | 12,7         | 662           | 6,4          |
| Servicio Occidental de Salud SOS                                                                      | 365          | 5,1          | 46           | 1,5          | 411           | 4,0          |
| Saludcoop                                                                                             | 287          | 4,0          | 38           | 1,2          | 325           | 3,1          |
| Colmédica                                                                                             | 258          | 3,6          | 61           | 1,9          | 319           | 3,1          |
| Famisanar                                                                                             | 255          | 3,6          | 0            | 0,0          | 255           | 2,5          |
| Comfenalco Valle                                                                                      | 198          | 2,8          | 0            | 0,0          | 198           | 1,9          |
| Humana Vivir                                                                                          | 125          | 1,7          | 51           | 1,6          | 176           | 1,7          |
| Red Salud                                                                                             | 111          | 1,5          | 1            | 0,0          | 112           | 1,1          |
| Cafesalud                                                                                             | 82           | 1,1          | 8            | 0,3          | 90            | 0,9          |
| Salud Colpatria                                                                                       | 67           | ,9           | 0            | 0,0          | 67            | 0,6          |
| Cruz Blanca                                                                                           | 42           | ,6           | 10           | 0,3          | 52            | 0,5          |
| Saludvida                                                                                             | 23           | ,3           | 0            | 0,0          | 23            | 0,2          |
| Solsalud                                                                                              | 14           | ,2           | 0            | 0,0          | 14            | 0,1          |
| Salud Colombia EPS                                                                                    | 4            | ,1           | 0            | 0,0          | 4             | 0,0          |
| <b>Total</b>                                                                                          | <b>7.179</b> | <b>100,0</b> | <b>3.160</b> | <b>100,0</b> | <b>10.339</b> | <b>100,0</b> |



- **Servicios negados con CTC.**

De acuerdo con la información suministrada por las EPS, el motivo más frecuente de negación es el de no agotar las alternativas terapéuticas del POS<sup>6</sup>, aspecto que en la resolución incluye prestaciones en salud, medicamentos y/o servicios médicos (actividades, procedimientos e intervenciones), los cuales deberían ser reglamentados de manera especial por cuanto la especificidad del procedimiento para medicamentos no es aplicable a los demás servicios en salud.

Respecto de la segunda causal de negaciones, en cuanto a que “no se podrán prescribirse medicamentos, servicios médicos y prestaciones de salud que no se encuentren debidamente autorizados para su uso y ejecución o realización por las respectivas normas vigente en el país como las expedidas por el Invima”<sup>7</sup>, esta entidad les recomienda a las casas terapéuticas considerar la posibilidad de tramitar patentes para segundos usos.

Varias de las negaciones son atribuibles a los médicos tratantes, debido a que algunos profesionales omiten los procedimientos establecidos para efectuar solicitudes ante el CTC. Entre ellas están: la falta de justificación, información incompleta, soportes inconsistentes e ilegibles y fórmulas sin requisitos legales.

Otro motivo de negación es que “no esté en riesgo la vida y la salud del paciente”<sup>8</sup>. En este punto, si bien es cierto que la finalidad inicial de los del CTC fue la de evitar tutelas en aquellos casos en que se ponía en riesgo la salud y la vida de los pacientes, con la sentencia T-760 de 2008 se cambia la finalidad de los mismos para que, a través de ese espacio, se resuelvan las necesidades de los usuarios sin tener que acudir a la acción de tutela aun en aquellos casos en que no está en riesgo la vida, lo que en consecuencia disminuye el número de acciones que deban interponerse.

En cuanto al motivo de negación “lo solicitado está o se encuentra en el POS”, demuestra que no existe claridad del contenido del POS, razón por la cual es importante definirlo de manera precisa, para garantizar efectivamente el acceso real de las personas al servicio de salud.

Aunque la Corte ha mencionado de manera reiterada la obligatoriedad, entre otras, de que el médico que prescriba esté adscrito a la red de prestadores de la entidad de aseguramiento, con la sentencia T-760 de 2008 se fortaleció el concepto de médico tratante y se estableció la posibilidad de que este no pertenezca a la red. Por tal motivo, llama la atención que se continúen negando solicitudes por esta razón, en contravía de lo establecido en la sentencia. Ello vulnera de manera flagrante los derechos que los asegurados tienen y los obliga a acudir a la tutela para

6 Resolución 3099 de 2008, artículo 6, literal c).

7 Resolución 3099 de 2008, artículo 6, literal b).

8 Resolución 3099 de 2008, artículo 6, literal d).

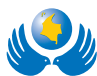

obtener protección. Las EPS, al realizar las negaciones, se fundamentan en la Resolución 3099 de 2008, artículo 6 literal a), la cual estipula: *"La prescripción de medicamentos y demás servicios médicos y prestaciones de salud no incluidos en el Manual de Medicamentos del Plan Obligatorio de Salud solo podrá realizarse por el personal autorizado de la entidad administradora de planes de beneficios. No se tendrán como válidas transcripciones de prescripciones de profesionales que no pertenezcan a la red de servicios de cada una de ellas"*.

- **Servicios negados sin CTC.**

La primera causal de negación es "no tener la edad requerida", concepto por el cual Salud Total registra 764 (96%). De este total, 502 se refieren a los programas Crecimiento y Desarrollo (65%), seguidos por los de Planificación Familiar y Control Prenatal, con 45 y 29 negaciones, respectivamente.

La segunda causal de negación es "ser no POS", motivo que se presenta, según lo indicado por las EPS del régimen subsidiado, cuando lo solicitado no está dentro del POS pero sí dentro del POS contributivo; por ello, las entidades de aseguramiento proceden a remitirlo al ente territorial para que lo cubra, sin que sean revisadas por el CTC.

Otra de las causales de negación es que se "excede la cantidad máxima permitida", de la cual Salud Total registra el 100%. Al analizar los motivos, se encuentra que, al igual que la primera causal, también corresponden a los programas de Crecimiento y Desarrollo, con 240 (41%), y de Planificación Familiar, con 141 negaciones.

En cuanto al motivo "el usuario está en mora", se registran 285 negaciones, de las cuales 193 también corresponden a Salud Total (68%). Los servicios solicitados se concentran en consulta general y externa y en otros procedimientos anatomopatológicos como la citología vaginal tumoral. (*Tabla N° 49*).

TABLA N° 49.

| MOTIVOS DE NEGACIÓN DE SERVICIOS EN EL RÉGIMEN CONTRIBUTIVO<br>EN EL PERÍODO OCTUBRE-DICIEMBRE DE 2008 |              |              |              |              |               |              |
|--------------------------------------------------------------------------------------------------------|--------------|--------------|--------------|--------------|---------------|--------------|
|                                                                                                        | CON CTC      |              | SIN CTC      |              | Total         |              |
|                                                                                                        | Negaciones   | Part. %      | Negaciones   | Part. %      | Negaciones    | Part. %      |
| No agotó POS                                                                                           | 1.849        | 25,8         | 22           | ,7           | 1.871         | 18,1         |
| No se encuentra autorizado para su uso o sin registro Invima                                           | 1.383        | 19,3         | 0            | ,0           | 1.383         | 13,4         |
| Lo solicitado es de carácter suntuoso, cosmético o estético                                            | 1.076        | 15,0         | 18           | ,6           | 1.094         | 10,6         |
| Información incompleta                                                                                 | 310          | 4,3          | 552          | 17,5         | 862           | 8,3          |
| No tiene edad requerida                                                                                | 3            | 0,0          | 797          | 25,2         | 800           | 7,7          |
| Es NO POS                                                                                              | 22           | 0,3          | 645          | 20,4         | 667           | 6,5          |
| Excede cantidad máxima por servicio                                                                    | 0            | 0,0          | 579          | 18,3         | 579           | 5,6          |
| Falta justificación                                                                                    | 363          | 5,1          | 0            | 0,0          | 363           | 3,5          |
| No existe riesgo para la salud o la vida                                                               | 283          | 3,9          | 21           | 0,7          | 304           | 2,9          |
| El usuario está en mora                                                                                | 15           | ,2           | 285          | 9,0          | 300           | 2,9          |
| Ya fue autorizado por tutela                                                                           | 267          | 3,7          | 0            | 0,0          | 267           | 2,6          |
| Por pertinencia médica                                                                                 | 228          | 3,2          | 1            | 0,0          | 229           | 2,2          |
| Soportes o prescripción por médico no tratante                                                         | 219          | 3,1          | 0            | 0,0          | 219           | 2,1          |
| Es experimental o no hay evidencia médico-científica                                                   | 191          | 2,7          | 0            | 0,0          | 191           | 1,8          |
| Servicio solo para mujeres                                                                             | 0            | 0,0          | 151          | 4,8          | 151           | 1,5          |
| Soportes inconsistentes/ilegibles                                                                      | 134          | 1,9          | 3            | 0,1          | 137           | 1,3          |
| Lo solicitado es POS                                                                                   | 121          | 1,7          | 9            | 0,3          | 130           | 1,3          |
| Por razones clínicas del paciente                                                                      | 123          | 1,7          | 0            | 0,0          | 123           | 1,2          |
| Presentado extemporáneo                                                                                | 94           | 1,3          | 14           | 0,4          | 108           | 1,0          |
| Debe ser valorado por otro especialista o programa                                                     | 78           | 1,1          | 0            | 0,0          | 78            | 0,8          |
| Quien prescribe no pertenece a la red de la EPS                                                        | 60           | 0,8          | 13           | 0,4          | 73            | 0,7          |
| El usuario tiene capacidad de pago                                                                     | 60           | 0,8          | 0            | 0,0          | 60            | 0,6          |
| El objetivo del tratamiento no es curativo                                                             | 43           | 0,6          | 0            | 0,0          | 43            | 0,4          |
| Ya fue autorizado por el CTC                                                                           | 40           | 0,6          | 0            | 0,0          | 40            | 0,4          |
| No disponible en el mercado                                                                            | 38           | 0,5          | 2            | 0,1          | 40            | 0,4          |
| El usuario tiene existencia de medicamentos                                                            | 37           | 0,5          | 0            | 0,0          | 37            | 0,4          |
| Incluido en paquete de atención                                                                        | 27           | 0,4          | 0            | 0,0          | 27            | 0,3          |
| El CTC sugiere otras recomendaciones                                                                   | 25           | 0,3          | 0            | 0,0          | 25            | 0,2          |
| Usuario en protección laboral                                                                          | 0            | 0,0          | 23           | 0,7          | 23            | 0,2          |
| Fórmula sin requisitos                                                                                 | 16           | 0,2          | 0            | 0,0          | 16            | 0,2          |
| Servicio solo para hombres                                                                             | 0            | 0,0          | 14           | 0,4          | 14            | 0,1          |
| Usuario no afiliado o suspendido                                                                       | 2            | 0,0          | 10           | 0,3          | 12            | 0,1          |
| Debe evaluarse costo-eficiencia                                                                        | 6            | 0,1          | 0            | 0,0          | 6             | 0,1          |
| Es un vital no disponible                                                                              | 5            | 0,1          | 0            | 0,0          | 5             | 0,0          |
| Servicio asumido por ARP/Soat                                                                          | 2            | 0,0          | 0            | 0,0          | 2             | 0,0          |
| Otras razones                                                                                          | 59           | 00,8         | 1            | 0,0          | 60            | 0,6          |
| <b>Total</b>                                                                                           | <b>7.179</b> | <b>100,0</b> | <b>3.160</b> | <b>100,0</b> | <b>10.339</b> | <b>100,0</b> |



## b) Negaciones en el régimen subsidiado.

A este régimen le corresponden 118.785 negaciones. Encabezan el listado Comfamiliar Huila (30.297), Comfamiliar Cartagena (19.684) y Comparta (13.382). (Tabla N° 50).

TABLA N° 50.

| EPS QUE NEGARON SERVICIOS DE SALUD EN EL RÉGIMEN SUBSIDIADO |               |              |               |              |                |              |
|-------------------------------------------------------------|---------------|--------------|---------------|--------------|----------------|--------------|
| PERÍODO OCTUBRE-DICIEMBRE DE 2008                           |               |              |               |              |                |              |
|                                                             | CON CTC       |              | SIN CTC       |              | Total          |              |
|                                                             | Negaciones    | Part. %      | Negaciones    | Part. %      | Negaciones     | Part. %      |
| Comfamiliar Huila                                           | 30.163        | 91,8         | 134           | 0,2          | 30.297         | 25,5         |
| Comfamiliar Cartagena                                       | 1             | 0,0          | 19.683        | 22,9         | 19.684         | 16,6         |
| Comparta                                                    | 25            | 0,1          | 13.357        | 15,5         | 13.382         | 11,3         |
| Asociación Mutual Barrios Unidos de Quibdó                  | 8             | 0,0          | 10.138        | 11,8         | 10.146         | 8,5          |
| Caprecom                                                    | 958           | 2,9          | 8.679         | 10,1         | 9.637          | 8,1          |
| Emssanar                                                    | 291           | 0,9          | 5.271         | 6,1          | 5.562          | 4,7          |
| Caja de Compensación del Caquetá                            | 0             | 0,0          | 5.538         | 6,4          | 5.538          | 4,7          |
| Salud Total                                                 | 1             | 0,0          | 5.142         | 6,0          | 5.143          | 4,3          |
| Comfacundi                                                  | 2             | 0,0          | 3.485         | 4,1          | 3.487          | 2,9          |
| Asociación Mutual La Esperanza "Asmet Salud"                | 10            | 0,0          | 3.389         | 3,9          | 3.399          | 2,9          |
| Comfamiliar de La Guajira                                   | 0             | 0,0          | 3.377         | 3,9          | 3.377          | 2,8          |
| Comfachocó                                                  | 0             | 0,0          | 1.904         | 2,2          | 1.904          | 1,6          |
| Asociación Indígena del Cauca                               | 20            | 0,1          | 1.480         | 1,7          | 1.500          | 1,3          |
| Cóndor                                                      | 132           | 0,4          | 1.061         | 1,2          | 1.193          | 1,0          |
| Solsalud                                                    | 62            | 0,2          | 1.128         | 1,3          | 1.190          | 1,0          |
| Convida                                                     | 6             | 0,0          | 779           | 0,9          | 785            | 0,7          |
| Comfacor                                                    | 23            | 0,1          | 450           | 0,5          | 473            | 0,4          |
| Empresa Cooperativa Solidaria de Salud "Ecoopsos"           | 459           | 1,4          | 0             | 0,0          | 459            | 0,4          |
| Comfasucre                                                  | 5             | 0,0          | 275           | 0,3          | 280            | 0,2          |
| Comfenalco Quindío                                          | 0             | 0,0          | 249           | 0,3          | 249            | 0,2          |
| Colsubsidio/Comfenalco                                      | 213           | 0,6          | 20            | 0,0          | 233            | 0,2          |
| Anas Wayuu EPS indígena                                     | 0             | 0,0          | 189           | 0,2          | 189            | 0,2          |
| Humana Vivir                                                | 119           | 0,4          | 42            | 0,0          | 161            | 0,1          |
| Cafam                                                       | 104           | 0,3          | 53            | 0,1          | 157            | 0,1          |
| Calisalud                                                   | 147           | 0,4          | 0             | 0,0          | 147            | 0,1          |
| Comfamiliar de Nariño                                       | 0             | 0,0          | 62            | 0,1          | 62             | 0,1          |
| Comfenalco Antioquia                                        | 0             | 0,0          | 41            | 0,0          | 41             | 0,0          |
| Comfama                                                     | 36            | 0,1          | 0             | 0,0          | 36             | 0,0          |
| Comfaboy                                                    | 28            | 0,1          | 0             | 0,0          | 28             | 0,0          |
| Mallamas EPSI                                               | 25            | 0,1          | 0             | 0,0          | 25             | 0,0          |
| Comfenalco Tolima                                           | 3             | 0,0          | 11            | 0,0          | 14             | 0,0          |
| Comfaoriente                                                | 4             | 0,0          | 0             | 0,0          | 4              | 0,0          |
| Comfamiliar Camacol                                         | 1             | 0,0          | 0             | 0,0          | 1              | 0,0          |
| Comfenalco Santander                                        | 1             | 0,0          | 0             | 0,0          | 1              | 0,0          |
| Asociación de Cabildos Indígenas del Cesar "Dasakawi"       | 1             | 0,0          | 0             | 0,0          | 1              | 0,0          |
| <b>Total</b>                                                | <b>32.848</b> | <b>100,0</b> | <b>85.937</b> | <b>100,0</b> | <b>118.785</b> | <b>100,0</b> |

Del total de las negaciones en este régimen se destaca que el 93.4% es remitido al ente territorial para ser cubierto con subsidio a la oferta, en cumplimiento de las normas establecidas, en especial la Resolución 5334 de 2008 y la sentencia T- 760 de 2008. (Tabla N° 50).

TABLA N° 51.

| MOTIVOS DE NEGACIÓN DE SERVICIOS EN EL RÉGIMEN SUBSIDIADO<br>EN EL PERÍODO OCTUBRE-DICIEMBRE DE 2008 |               |              |               |              |                |              |
|------------------------------------------------------------------------------------------------------|---------------|--------------|---------------|--------------|----------------|--------------|
|                                                                                                      | CON CTC       |              | SIN CTC       |              | Total          |              |
|                                                                                                      | Negaciones    | Part. %      | Negaciones    | Part. %      | Negaciones     | Part. %      |
| Lo cubre la entidad territorial                                                                      | 30.633        | 93,3         | 80.261        | 93,4         | 110.894        | 93,4         |
| Falta justificación                                                                                  | 132           | ,4           | 5.546         | 6,5          | 5.678          | 4,8          |
| Ya fue autorizado por el CTC                                                                         | 528           | 1,6          | 3             | 0,0          | 531            | 0,4          |
| Información incompleta                                                                               | 434           | 1,3          | 17            | 0,0          | 451            | 0,4          |
| No existe riesgo para la salud o la vida                                                             | 358           | 1,1          | 0             | 0,0          | 358            | 0,3          |
| No agotó POS                                                                                         | 189           | ,6           | 0             | 0,0          | 189            | 0,2          |
| Presentado extemporáneo                                                                              | 148           | ,5           | 1             | 0,0          | 149            | 0,1          |
| Usuario no afiliado o suspendido                                                                     | 11            | ,0           | 75            | 0,1          | 86             | 0,1          |
| Lo solicitado es POS                                                                                 | 80            | 0,2          | 1             | 0,0          | 81             | 0,1          |
| Fórmula sin requisitos                                                                               | 59            | 0,2          | 0             | 0,0          | 59             | 0,0          |
| Soportes Inconsistentes/ilegibles                                                                    | 44            | 0,1          | 0             | 0,0          | 44             | 0,0          |
| Lo solicitado es de carácter suntuoso, cosmético o estético                                          | 39            | 0,1          | 0             | 0,0          | 39             | 0,0          |
| Formato de solicitud mal diligenciado                                                                | 34            | 0,1          | 0             | 0,0          | 34             | 0,0          |
| No se encuentra autorizado para su uso o sin registro Invima                                         | 25            | 0,1          | 0             | 0,0          | 25             | 0,0          |
| Por razones clínicas del paciente                                                                    | 17            | 0,1          | 2             | 0,0          | 19             | 0,0          |
| Por pertinencia médica                                                                               | 11            | 0,0          | 2             | 0,0          | 13             | 0,0          |
| Incluido en paquete de atención                                                                      | 11            | 0,0          | 1             | 0,0          | 12             | 0,0          |
| Soportes o prescripción por médico no tratante                                                       | 11            | 0,0          | 0             | 0,0          | 11             | 0,0          |
| Excede cantidad máxima por servicio                                                                  | 0             | 0,0          | 11            | 0,0          | 11             | 0,0          |
| Quien prescribe no pertenece a la red de la EPS                                                      | 8             | 0,0          | 1             | 0,0          | 9              | 0,0          |
| Debe ser valorado por otro especialista o programa                                                   | 7             | 0,0          | 1             | 0,0          | 8              | 0,0          |
| Servicio asumido por ARP/Soat                                                                        | 2             | 0,0          | 6             | 0,0          | 8              | 0,0          |
| Ya fue autorizado por tutela                                                                         | 7             | 0,0          | 0             | 0,0          | 7              | 0,0          |
| Es experimental o no hay evidencia médico-científica                                                 | 6             | 0,0          | 0             | 0,0          | 6              | 0,0          |
| No tiene edad requerida                                                                              | 3             | 0,0          | 2             | 0,0          | 5              | 0,0          |
| Usuario en protección laboral                                                                        | 0             | 0,0          | 5             | 0,0          | 5              | 0,0          |
| No disponible en el mercado                                                                          | 3             | 0,0          | 0             | 0,0          | 3              | 0,0          |
| El usuario tiene existencia de medicamentos                                                          | 1             | 0,0          | 0             | 0,0          | 1              | 0,0          |
| Otras razones                                                                                        | 47            | 0,1          | 2             | 0,0          | 49             | 0,0          |
| <b>Total</b>                                                                                         | <b>32.848</b> | <b>100,0</b> | <b>85.937</b> | <b>100,0</b> | <b>118.785</b> | <b>100,0</b> |



Al igual que en el régimen contributivo, varias de las negaciones son atribuibles a los profesionales de la salud, tales como falta de justificación, soportes inconsistentes, información incompleta, fórmulas sin requisitos formales y formatos mal diligenciados. (Tabla N° 50).

TABLA N° 52.

| MOTIVOS DE NEGACIÓN DE SERVICIOS EN EL RÉGIMEN SUBSIDIADO<br>SIN PRIMERA CAUSAL PERÍODO OCTUBRE-DICIEMBRE DE 2008 |              |              |              |              |              |              |
|-------------------------------------------------------------------------------------------------------------------|--------------|--------------|--------------|--------------|--------------|--------------|
|                                                                                                                   | CON CTC      |              | SIN CTC      |              | Total        |              |
|                                                                                                                   | Negaciones   | Part. %      | Negaciones   | Part. %      | Negaciones   | Part. %      |
| Falta justificación                                                                                               | 132          | 6,0          | 5.546        | 97,7         | 5.678        | 72,0         |
| Ya fue autorizado por el CTC                                                                                      | 528          | 23,8         | 3            | 0,1          | 531          | 6,7          |
| Información incompleta                                                                                            | 434          | 19,6         | 17           | 0,3          | 451          | 5,7          |
| No existe riesgo para la salud o la vida                                                                          | 358          | 16,2         | 0            | 0,0          | 358          | 4,5          |
| No agotó POS                                                                                                      | 189          | 8,5          | 0            | 0,0          | 189          | 2,4          |
| Presentado extemporáneo                                                                                           | 148          | 6,7          | 1            | 0,0          | 149          | 1,9          |
| Usuario no afiliado o suspendido                                                                                  | 11           | ,5           | 75           | 1,3          | 86           | 1,1          |
| Lo solicitado es POS                                                                                              | 80           | 3,6          | 1            | 0,0          | 81           | 1,0          |
| Fórmula sin requisitos                                                                                            | 59           | 2,7          | 0            | 0,0          | 59           | 0,7          |
| Soportes inconsistentes/ilegibles                                                                                 | 44           | 2,0          | 0            | 0,0          | 44           | 0,6          |
| Lo solicitado es de carácter suntuoso, cosmético o estético                                                       | 39           | 1,8          | 0            | 0,0          | 39           | 0,5          |
| Formato de solicitud mal diligenciado                                                                             | 34           | 1,5          | 0            | 0,0          | 34           | 0,4          |
| No se encuentra autorizado para su uso o sin registro Invima                                                      | 25           | 1,1          | 0            | 0,0          | 25           | 0,3          |
| Por razones clínicas del paciente                                                                                 | 17           | 0,8          | 2            | 0,0          | 19           | 0,2          |
| Por pertinencia Médica                                                                                            | 11           | 0,5          | 2            | 0,0          | 13           | 0,2          |
| Incluido en paquete de atención                                                                                   | 11           | 0,5          | 1            | 0,0          | 12           | 0,2          |
| Soportes o prescripción por médico no tratante                                                                    | 11           | 0,5          | 0            | 0,0          | 11           | 0,1          |
| Excede cantidad máxima por servicio                                                                               | 0            | 0,0          | 11           | 0,2          | 11           | 0,1          |
| Quien prescribe no pertenece a la red de la EPS                                                                   | 8            | 0,4          | 1            | 0,0          | 9            | 0,1          |
| Debe ser valorado por otro especialista o programa                                                                | 7            | 0,3          | 1            | 0,0          | 8            | 0,1          |
| Servicio asumido por ARP/Soat                                                                                     | 2            | 0,1          | 6            | 0,1          | 8            | 0,1          |
| Ya fue autorizado por tutela                                                                                      | 7            | 0,3          | 0            | 0,0          | 7            | 0,1          |
| Es experimental o no hay evidencia médico-científica                                                              | 6            | 0,3          | 0            | 0,0          | 6            | 0,1          |
| No tiene edad requerida                                                                                           | 3            | 0,1          | 2            | 0,0          | 5            | 0,1          |
| Usuario en protección laboral                                                                                     | 0            | 0,0          | 5            | 0,1          | 5            | 0,1          |
| No disponible en el mercado                                                                                       | 3            | 0,1          | 0            | 0,0          | 3            | 0,0          |
| El usuario tiene existencia de medicamentos                                                                       | 1            | 0,0          | 0            | 0,0          | 1            | 0,0          |
| Otras razones                                                                                                     | 47           | 2,1          | 2            | 0,0          | 49           | 0,6          |
| <b>Total</b>                                                                                                      | <b>2.215</b> | <b>100,0</b> | <b>5.676</b> | <b>100,0</b> | <b>7.891</b> | <b>100,0</b> |

En conclusión, muchas de las negaciones están fundamentadas en la Resolución 3099 de 2008, la cual debe ajustarse a lo ordenado por la Honorable Corte Constitucional respecto de la garantía en el acceso a los servicios de salud, ya que las dos modificaciones a dicha resolución solo se refieren a los recobros. La citada norma debe adecuarse a lo ordenado por la Corte Constitucional, en los siguientes aspectos:

1. Las reuniones relacionadas en el artículo 5 de dicha resolución van en contravía de la finalidad de la sentencia T-760 de 2008, que ordena que los CTC entren a suplir la presentación de tutelas, lo cual sólo sería posible si estas son oportunas. Es por eso que esta entidad, debido al volumen de solicitudes, considera que es necesario que dichas reuniones se hagan con una periodicidad más frecuente de lo allí establecido.
2. Según el numeral 1 del artículo 4 y la totalidad del artículo 6, la resolución debe ajustarse en los siguientes puntos:
  - 2.1. No se puede tratar de la misma manera los procedimientos que se deben seguir respecto de medicamentos con el de “actividades, intervenciones y procedimientos No POS” recientemente incluidos, ya que estos no cuentan con alternativas terapéuticas definidas en instrumentos o guías de atención, como sí lo tienen los medicamentos.
  - 2.2. En cuanto al concepto del médico tratante, la sentencia establece que este puede estar o no adscrito a la red de prestadores, posibilidad que no considera la resolución, lo cual va en contra de la sentencia, al establecer que “no se tendrán como válidas transcripciones de prescripciones de profesionales que no pertenezcan a la red de servicios de cada una de ellas”.
  - 2.3. La finalidad de la sentencia es que los ciudadanos cuenten con un mecanismo administrativo para el acceso a los medicamentos, actividades, intervenciones y procedimientos que están por fuera del plan de beneficios; por lo cual, exigir para la aprobación en el CTC de una de estas solicitudes que el paciente debe encontrarse en situación de riesgo inminente para su vida o su salud es totalmente distinto a su finalidad y tendrá como consecuencia precisamente el efecto contrario, es decir, un incremento en el número de tutelas, tal como lo observa esta entidad en el estudio de actualización de tutelas del período 2006-2008.
3. La Resolución 3099 de 2008 no es clara, no ofrece soluciones efectivas a la problemática de los medicamentos, actividades, intervenciones y procedimientos del Sistema General de Seguridad Social en Salud. El cumplimiento de esta Resolución por parte de las EPS puede afectar los derechos de los usuarios.



## 5. CONCLUSIONES

La acción de tutela continúa siendo el mecanismo más efectivo utilizado por los colombianos para hacer valer sus derechos.

El 55.1% de las tutelas en general se concentra en Bogotá, Antioquia y Valle del Cauca.

El derecho a la salud se constituyó como el más invocado en las tutelas y más de la tercera parte de estas lo contienen.

En dieciseis (16) departamentos el derecho a la salud es el más invocado en las tutelas.

Caldas y Antioquia registran más de 60 tutelas en salud por cada 10.000 habitantes.

El 86% de las tutelas en salud favorece a los accionantes. Las denegadas, en su mayoría, obedecen a factores distintos del reconocimiento del derecho, como la carencia de objeto o hecho superado.

El 78.1% de las tutelas en salud se interpone contra las EPS que administran los regímenes contributivo y subsidiado, seguido en menor proporción por los entes territoriales, los cuales en conjunto alcanzan el 14.3%.

En el régimen contributivo, el Seguro Social fue la entidad más tutelada, con una participación del 31.5% en el año 2008, seguida de Coomeva, con el 20.3%, y Saludcoop con el 15.1%.

Según el número de tutelas por cada 10.000 afiliados, el Seguro Social es la entidad más tutelada, al presentar hasta la fecha de funcionamiento 97.6 tutelas, seguida de Coomeva y Salud Colpatria, con 55 y 51.4 tutelas, respectivamente.

Respecto de las EPS que prestan servicios solamente en el régimen subsidiado, al aplicar el indicador de número de tutelas por cada 10.000 afiliados, Comfenalco Quindío fue la entidad más tutelada, con 32.6 tutelas, seguida de Comfenalco Santander y Córdor.

En el año 2008, cerca de la mitad de las tutelas interpuestas en contra de las entidades del Estado estuvieron dirigidas contra Acción Social.

Un promedio de 1.000 tutelas anuales se interponen en contra del Inpec o directamente a las penitenciarías para reclamar servicios de salud. Los departamentos de Caldas, Santander y Boyacá fueron las regiones donde se instauraron más tutelas por este concepto.



El 53.4% de las solicitudes incluidas en las tutelas se refieren a servicios que se encuentran en el POS, de las cuales el 85.5% corresponde al régimen contributivo.

Las cirugías, los medicamentos y los exámenes paraclínicos, en su orden, fueron los servicios más solicitados en las tutelas.

El 74.8% de las solicitudes por cirugías están en el POS; de estas, el 88.5% corresponde al régimen contributivo. Las principales negaciones surgen en aquellas cirugías que requieren insumos o aditamentos adicionales para su realización, tales como la corrección de cataratas, los implantes de stent y en cuanto a ortopedia, las que implican reemplazos articulares y material de osteosíntesis.

En medicamentos, el 23.5% de las solicitudes está en el POS; de estas, el 51.6% pertenece al régimen contributivo y los más solicitados son el ácido valproico, losartan, metoprolol y omeprazol, entre otros. En cuanto a lo No POS resaltan medicamentos como clopidogrel, glucosamina, drogas psiquiátricas y antihipertensivos de nueva generación, biológicos y, en general, todos los medicamentos de marca.

En exámenes paraclínicos, el 62.6% de las solicitudes están relacionados con exámenes incluidos en el POS; de estas, el 87% corresponde al régimen contributivo. Las más reiteradas son la resonancia nuclear magnética de cráneo y de columna y a TAC abdominales de columna y cerebro. En lo No POS se solicitan las pruebas alérgicas, pruebas electrofisiológicas (mapeo y ablación), test de mesa basculante y los cariotipos.

El 48.2% de las prótesis y órtesis solicitadas en las tutelas están incluidas en el POS; de estas, el 93.7% corresponde al régimen contributivo. Las solicitudes más reiteradas son lentes intraoculares, stent básico y reemplazos articulares. En cuanto a lo No POS, las negaciones aparecen en aquellas que requieren tecnologías específicas, como el implante coclear, prótesis con especificaciones especiales y stent medicalizados, entre otros.

El 66.9% de las solicitudes por tratamientos está incluido en el POS; de estas, el 86% corresponde al régimen contributivo; las más solicitadas son las quimioterapias y radioterapias, seguidas de las terapias de rehabilitación (fisioterapia, de lenguaje y ocupacional). En lo No POS se destacan los tratamientos odontológicos.

La adopción de las guías de manejo y modelos de atención redujo de manera significativa las tutelas para VIH/sida y pacientes renales.

Para garantizar el tratamiento completo de su enfermedad, los pacientes solicitan en las tutelas que se les conceda el tratamiento de manera integral.



El 77.7% de las solicitudes por procedimientos está en el POS; de estas, el 91% corresponde al régimen contributivo; las más solicitadas son las biopsias, litotripias extracorpóreas, diálisis peritoneal y hemodiálisis.

La falta de recurso humano, la concentración de profesionales en las grandes urbes, la falta de oportunidad y aplazamiento en citas de espera son los principales motivos de interposición de tutelas para solicitar citas médicas especializadas.

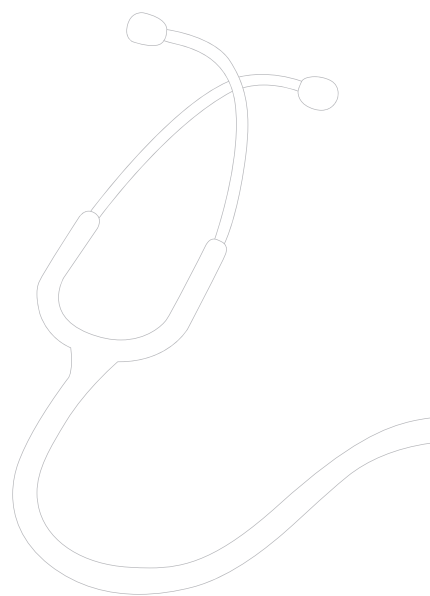



## 6. RECOMENDACIONES

Urgir al Gobierno Nacional para que reasigne los recursos existentes en el sistema y, si es necesario, establezca mecanismos para la consecución de nuevos recursos con el fin de unificar el POS de tal forma que garantice el cubrimiento de las necesidades de los ciudadanos sin menoscabar el contenido actual del plan de beneficios del régimen contributivo.

Instar al Ministerio de la Protección Social a que adopte guías de manejo y modelos de atención para las diferentes patologías, tal como se hizo con VIH/sida y pacientes renales.

Conminar al Ministerio de la Protección Social en el sentido de que modifique la Resolución 3099 de 2008, por cuanto no se ajusta a lo ordenado por la Honorable Corte Constitucional en la Sentencia T-760 de 2008 respecto de la garantía de acceso a los servicios en salud, lo cual genera negaciones que, en la mayoría de los casos, se convierten en tutelas.

Instar al Ministerio de la Protección Social para que en conjunto con el Ministerio de Educación adopte una política nacional que regule y garantice el recurso humano en salud en todo el territorio nacional.

Conminar a la Superintendencia Nacional de Salud para que, en virtud de sus funciones de inspección, vigilancia y control, ejerza sus facultades jurisdiccionales y sancione de manera ejemplar a aquellas entidades que de manera reiterada vulneren el derecho a la salud, especialmente las que nieguen contenidos del POS.

Instar a la Comisión de Regulación en Salud –Cres– para que el plan de beneficios unificado no sea inferior a los contenidos del actual plan de beneficios del régimen contributivo, en cumplimiento del principio de progresividad de la seguridad social.

Solicitar a la Cres que precise el contenido del nuevo plan de beneficios, aplicando el principio de integralidad ordenado por la Corte Constitucional.

Sugerir a la Cres que tenga en cuenta este informe como herramienta complementaria para el ajuste del plan de beneficios.

Instar a la Cres para que regule los procedimientos que deben adelantar los médicos tratantes adscritos o no a la red de las EPS, de tal forma que los CTC autoricen los servicios de salud requeridos por los pacientes en cumplimiento de la Sentencia T-760 de 2008.



Exhortar a las veedurías ciudadanas para que, en cumplimiento de su función legal, ejerzan vigilancia en la utilización de los recursos asignados al régimen subsidiado.

Solicitar al Congreso de la República que considere en una nueva Ley la figura del Defensor del Usuario en Salud en cabeza de la Defensoría del Pueblo, de tal forma que su mediación entre aseguradoras y usuarios disminuya la interposición de acciones de tutela.

Recomendar al Consejo Superior de la Judicatura el diseño de programas de capacitación en el Sistema General de Seguridad Social en Salud dirigido a jueces de la República, con el fin de darles mayores elementos para emitir sus fallos.

Conminar al Instituto Nacional de Salud para que adopte estrategias adecuadas para crear en los ciudadanos la cultura de donación de órganos.

Solicitar a la Asociación Colombiana de Empresas de Medicina Integral (Acemi) y a Gestarsalud que convoquen a sus afiliados con el fin de comprometerlos en un acuerdo de no negación de servicios de salud que se encuentren incluidos en el Plan Obligatorio de Salud tanto del régimen contributivo como del subsidiado y los autoricen de manera oportuna y sin dilaciones.

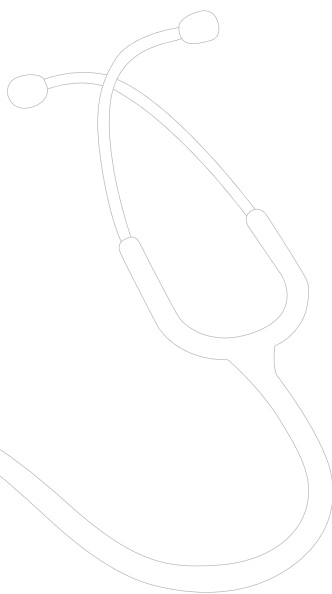

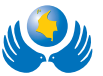

## Anexo N° 1.

## RESEÑA ESQUEMÁTICA DE TUTELAS

|     |                                 |  |
|-----|---------------------------------|--|
| 1.  | Expediente número:              |  |
| 2.  | Ciudad:                         |  |
| 3.  | Departamento:                   |  |
| 4.  | Recibo en Corte Constitucional: |  |
| 5.  | Juez de Primera Instancia:      |  |
| 6.  | Juez de Segunda Instancia:      |  |
| 7.  | Demandante:                     |  |
| 8.  | Demandado:                      |  |
| 9.  | Derechos invocados:             |  |
| 10. | Decisión en primera instancia:  |  |
| 11. | Decisión en segunda instancia:  |  |

Régimen al que pertenece el demandante: \_\_\_\_\_

## 12. HECHOS

Diagnóstico: \_\_\_\_\_

Nombre de los exámenes: \_\_\_\_\_

Nombre de los medicamentos: \_\_\_\_\_

Nombre de las cirugías: \_\_\_\_\_

Nombre de los tratamientos: \_\_\_\_\_

Nombre de las prótesis y órtesis: \_\_\_\_\_

Nombre de los insumos médicos: \_\_\_\_\_

Nombre de los procedimientos: \_\_\_\_\_

Nombre de las citas médicas solicitadas: \_\_\_\_\_

Descripción de otras solicitudes: \_\_\_\_\_

## 13. Resumen de fallo en primera instancia:

\_\_\_\_\_  
\_\_\_\_\_  
\_\_\_\_\_

## 14. Resumen de fallo en segunda instancia:

\_\_\_\_\_  
\_\_\_\_\_  
\_\_\_\_\_

## 15: Observaciones

\_\_\_\_\_  
\_\_\_\_\_  
\_\_\_\_\_

Diligenciado por \_\_\_\_\_ Fecha: \_\_\_\_\_



## Anexo N° 2.

### Marco legal y normativo de los planes de beneficios. Sistema General de Seguridad Social en Salud.

#### 1. Leyes:

##### 1.1. Ley 100 de 1993. Por la cual se crea el Sistema de Seguridad Social Integral

##### 1.1.1. Artículo 162. Plan Obligatorio de Salud.

El Sistema General de Seguridad Social de Salud crea las condiciones de acceso a un Plan Obligatorio de Salud para todos los habitantes del territorio nacional antes del año 2001. Este plan permitirá la protección integral de las familias a la maternidad y enfermedad general, en las fases de promoción y fomento de la salud y la prevención, diagnóstico, tratamiento y rehabilitación para todas las patologías, según la intensidad de uso y los niveles de atención y complejidad que se definan. (Subrayado fuera de texto)<sup>9</sup>.

Parágrafo 1. En el período de transición, la población del régimen subsidiado obtendrá los servicios hospitalarios de mayor complejidad en los hospitales públicos del subsector oficial de salud y en los de los hospitales privados con los cuales el Estado tenga contrato de prestación de servicios.

Parágrafo 2. Los servicios de salud incluidos en el Plan Obligatorio de Salud serán actualizados por el Consejo Nacional de Seguridad Social en Salud, de acuerdo con los cambios en la estructura demográfica de la población, el perfil epidemiológico nacional, la tecnología apropiada disponible en el país y las condiciones financieras del sistema.

Parágrafo 3. La Superintendencia Nacional de Salud verificará la conformidad de la prestación del Plan Obligatorio de Salud por cada Entidad Promotora de Salud en el territorio nacional con lo dispuesto por el Consejo Nacional de Seguridad Social en Salud y el Gobierno Nacional.

Parágrafo 4. Toda Entidad Promotora de Salud reasegurará los riesgos derivados de la atención de enfermedades calificadas por el Consejo Nacional de Seguridad Social como de alto costo.

Parágrafo 5. Para la prestación de los servicios del Plan Obligatorio de Salud, todas las Entidades Promotoras de Salud establecerán un sistema de referencia y contrareferencia para que el acceso a los servicios de alta complejidad se realice por el primer nivel de atención, excepto en los servicios de urgencias. El Gobierno nacional, sin perjuicio del sistema que corresponde a las entidades territoriales, establecerá las normas.

9 Corte Constitucional. Sentencias 911 y 932 de 1991 y sentencia 093 de 2000.

1.2. Ley 1122 de 2007. Por la cual se hacen algunas modificaciones en el Sistema General de Seguridad Social en Salud y se dictan otras disposiciones.

1.2.1. Artículo 14. Organización del aseguramiento. Para efectos de esta ley entiéndase por aseguramiento en salud, la administración del riesgo financiero, la gestión del riesgo en salud, la articulación de los servicios que garantice el acceso efectivo, la garantía de la calidad en la prestación de los servicios de salud y la representación del afiliado ante el prestador y los demás actores sin perjuicio de la autonomía del usuario. Lo anterior exige que el asegurador asuma el riesgo transferido por el usuario y cumpla con las obligaciones establecidas en los Planes Obligatorios de Salud. *(Subrayado fuera de texto)*.

Las Entidades Promotoras de Salud en cada régimen son las responsables de cumplir con las funciones indelegables del aseguramiento. Las entidades que a la vigencia de la presente ley administran el régimen subsidiado se denominarán en adelante Entidades Promotoras de Salud del régimen subsidiado (EPS). Cumplirán con los requisitos de habilitación y demás que señala el reglamento. *(Subrayado fuera de texto)*.

A partir de la vigencia de la presente ley el sistema tendrá las siguientes reglas adicionales para su operación: (...)

- g) No habrá copagos ni cuotas moderadoras para los afiliados del régimen subsidiado en Salud clasificados en el nivel I del Sisbén o el instrumento que lo remplace;
- h) No habrá períodos mínimos de cotización o períodos de carencia superiores a 26 semanas en el régimen contributivo. A los afiliados se les contabilizará el tiempo de afiliación en el régimen subsidiado o en cualquier EPS del régimen contributivo, para efectos de los cálculos de los períodos de carencia;
- i) La afiliación inicial de la población de desplazados y desmovilizados cuyo financiamiento en su totalidad esté a cargo del Fosyga se hará a una Entidad Promotora de Salud de naturaleza pública del orden nacional, sin perjuicio de que preserve el derecho a la libre elección en el siguiente período de traslado. El Gobierno Nacional reglamentará la afiliación de esta población cuando en el respectivo municipio no exista dicha oferta;
- j) En aquellos casos de enfermedad de alto costo en los que se soliciten medicamentos no incluidos en el plan de beneficios del régimen contributivo, las EPS llevarán a consideración del Comité Técnico Científico dichos requerimientos. Si la EPS no estudia oportunamente tales solicitudes ni las tramita ante el respectivo Comité y se obliga a la prestación de los mismos mediante acción de tutela, los costos serán cubiertos por partes iguales entre las EPS y el Fosyga. El Ministerio de la Protección Social reglamentará el presente artículo dentro de los seis (6) meses posteriores a la entrada



en vigencia de la presente ley. En todo caso, cuando el Fosyga haga el reconocimiento, el pago se hará sobre la base de las tarifas mínimas definidas por la Comisión de Regulación en Salud<sup>10</sup>;

k) Es responsabilidad de los aseguradores el implementar programas de promoción de la salud y prevención de la enfermedad que se enmarquen dentro las prioridades definidas en el Plan Nacional de Salud Pública. La gestión y resultados de dichos programas serán monitoreados a través de los mecanismos de evaluación de que trata el artículo 2o de la presente ley;

m) La población reclusa del país se afiliará al Sistema General de Seguridad Social en Salud. El Gobierno Nacional determinará los mecanismos que permitan la operatividad para que esta población reciba adecuadamente sus servicios.

1.2.2. Artículo 19. Aseguramiento de alto costo. Para la atención de enfermedades de alto costo las entidades promotoras de salud contratarán el reaseguro o responderán, directa o colectivamente por dicho riesgo, de conformidad con la reglamentación que sobre la materia expida el Gobierno nacional.

1.2.3. Artículo 20. Prestación de servicios de salud a la población pobre en lo no cubierto por subsidios a la demanda. <Artículo condicionalmente exequible> Las Entidades territoriales contratarán con Empresas Sociales del Estado debidamente habilitadas, la atención de la población pobre no asegurada y lo no cubierto por subsidios a la demanda. Cuando la oferta de servicios no exista o sea insuficiente en el municipio o en su área de influencia, la entidad territorial, previa autorización del Ministerio de la Protección Social o por quien delegue, podrá contratar con otras Instituciones Prestadoras de Servicios de Salud debidamente habilitadas.

Parágrafo 1. Se garantiza a todos los colombianos la atención inicial de urgencias en cualquier IPS del país. Las EPS o las entidades territoriales responsables de la atención a la población pobre no cubierta por los subsidios a la demanda, no podrán negar la prestación y pago de servicios a las IPS que atiendan sus afiliados, cuando estén causados por este tipo de servicios, aun sin que medie contrato. El incumplimiento de esta disposición, será sancionado por la Superintendencia Nacional de Salud con multas, por una sola vez o sucesivas, hasta de 2.000 salarios mínimos legales mensuales vigentes (smlmv) por cada multa, y en caso de reincidencia podrá conllevar hasta la pérdida o cancelación del registro o certificado de la institución.

10. Declarado *condicionalmente exequible* por la Corte Constitucional mediante sentencia C-463-08 según comunicado de prensa de la Sala Plena de 14 de mayo de 2008; Magistrado ponente: doctor Jaime Araújo Rentería, "en el entendido de que la regla sobre el reembolso de la mitad de los costos no cubiertos, también se aplica, siempre que una EPS sea obligada mediante acción de tutela a suministrar medicamentos y demás servicios médicos o prestaciones de salud prescritos por el médico tratante, no incluidos en el plan de beneficios de cualquiera de los regímenes legalmente vigentes".

Parágrafo 2. <Parágrafo adicionado por el artículo 44 de la Ley 1151 de 2007. El nuevo texto es el siguiente:> Las fundaciones sin ánimo de lucro que prestaron servicios como parte de la red hospitalaria pública, antes de la entrada en vigencia de la Ley 100 de 1993, podrán tener las mismas consideraciones contempladas en el presente artículo. El Gobierno Nacional reglamentará la materia.

- 1.2.4. Artículo 23. Obligaciones de las aseguradoras para garantizar la integralidad y continuidad en la prestación de los servicios. Las Empresas Promotoras de Salud (EPS) del régimen contributivo y subsidiado deberán atender con la celeridad y la frecuencia que requiera la complejidad de las patologías de los usuarios del mismo. Así mismo las citas médicas deben ser fijadas con la rapidez que requiere un tratamiento oportuno por parte de la EPS, en aplicación de los principios de accesibilidad y calidad correspondiente. (*Subrayado fuera de texto*).

El Gobierno nacional reglamentará dentro de los seis meses siguientes a la expedición de la presente ley, los límites de afiliación a las entidades promotoras de salud, previo estudio técnico que se realice de acuerdo con las capacidades técnicas, científicas y administrativas de las mismas.

- 1.2.5. Artículo 37. Ejes del sistema de inspección, vigilancia y control de la Superintendencia Nacional de Salud. Para cumplir con las funciones de inspección, vigilancia y control la Superintendencia Nacional de Salud ejercerá sus funciones teniendo como base los siguientes ejes:

(...)

Aseguramiento. Su objetivo es vigilar el cumplimiento de los derechos derivados de la afiliación o vinculación de la población a un plan de beneficios de salud.

Prestación de servicios de atención en salud pública. Su objetivo es vigilar que la prestación de los servicios de atención en salud individual y colectiva se haga en condiciones de disponibilidad, accesibilidad, aceptabilidad y estándares de calidad, en las fases de promoción, prevención, diagnóstico, tratamiento y rehabilitación.

Atención al usuario y participación social. Su objetivo es garantizar el cumplimiento de los derechos de los usuarios en el Sistema General de Seguridad Social en Salud, así como los deberes por parte de los diferentes actores del Sistema General de Seguridad Social en Salud; de igual forma promocionar y desarrollar los mecanismos de participación ciudadana y de protección al usuario del servicio de salud.



2. Decreto:
  - 2.1. Decreto 806 de 1998. Por el cual se reglamenta la afiliación al régimen de Seguridad Social en Salud y la prestación de los beneficios del servicio público esencial de Seguridad Social en Salud y como servicio de interés general, en todo el territorio nacional. (*Subrayado fuera del texto*).
3. Resoluciones:
  - 3.1. Resolución 5261 de 5 de agosto de 1994. Por la cual se establece el Manual de Actividades, Intervenciones y Procedimientos del Plan Obligatorio de Salud en el Sistema General de Seguridad Social en Salud.
  - 3.2. Resolución 412 de 25 de febrero de 2000. Por la cual se establecen las actividades, procedimientos e intervenciones de demanda inducida y obligatorio cumplimiento y se adoptan las normas técnicas y guías de atención para el desarrollo de las acciones de protección específica y detección temprana y la atención de enfermedades de interés en salud pública.
  - 3.3. Resolución 3384 de 29 de diciembre de 2000 -Por la cual se modifican parcialmente las resoluciones 412 y 1745 de 2000 y se deroga la Resolución 1078 de 2000.
  - 3.4. Resolución 3342 de 2006 del Ministerio de la Protección Social. Por la cual se adoptan las guías de práctica clínica basadas en evidencia para la prevención, diagnóstico y tratamiento de pacientes con VIH/sida y enfermedad renal crónica.
4. Acuerdos del Consejo Nacional de Seguridad Social en Salud:
  - 4.1. Acuerdo 17 de 29 de diciembre de 1998. Por el cual se establece el obligatorio cumplimiento de las actividades, procedimientos e intervenciones de demanda inducida y la atención de enfermedades de interés en salud pública.
  - 4.2. Acuerdo 226 de 27 de junio de 2002. Por el cual se incluye el uso de una tecnología dentro de las prestaciones que componen el Plan Obligatorio de Salud –acelerador lineal para teleterapia con fotones en el Plan Obligatorio de Salud, del régimen contributivo y del régimen subsidiado.
  - 4.3. Acuerdo 228 de 3 de mayo de 2002. Por medio del cual se actualiza el Manual de Medicamentos del Plan Obligatorio de Salud y se dictan otras disposiciones.
  - 4.4. Acuerdo 229 de 27 de junio 27 de 2002. Por el cual se define la proporción de UPC-S que se destinará para la financiación de las acciones de promoción y



prevención para el régimen subsidiado a cargo de las entidades territoriales y las Administradoras del régimen subsidiado y se dictan otras disposiciones.

- 4.5. Acuerdo 254 de 22 de septiembre de 2003. Por el cual se fija el valor de la Unidad de Pago por Capitación del Plan Obligatorio de Salud de los regímenes contributivo y subsidiado para el año 2004 y se dictan otras disposiciones. - Prótesis endovascular stent coronario convencional no recubierto y la prueba de ayuda diagnóstica de laboratorio carga viral en el régimen contributivo.
- 4.6. Acuerdo 260 de febrero de 2004. Por el cual se define el régimen de pagos compartidos y cuotas moderadoras dentro del Sistema General de Seguridad Social en Salud.
- 4.7. Acuerdo 263 de 14 de abril de 2004. Por el cual se da cumplimiento al fallo proferido por el Consejo de Estado: inclúyase en el Plan Obligatorio de Salud donde el principio activo denominado ácido zoledrónico o zoledronato en solución intravenosa para el tratamiento del cáncer, prescrito exclusivamente por oncólogo, para los casos de hipercalcemia de malignidad y mieloma múltiple y metástasis ósea.
- 4.8. Acuerdo 282 de 7 de enero de 2005. Por el cual se fija el valor de la Unidad de Pago por Capitación del Plan Obligatorio de Salud de los regímenes contributivo y subsidiado para el año 2005 y se dictan otras disposiciones. Trasplante hepático, como de alto costo, medicamentos. En el régimen subsidiado carga viral para VIH, Colposcopia con biopsia, stent intracoronario no recubierto y su inserción.
- 4.9. Acuerdo 289 de 28 de marzo de 2005. Por medio del cual se aclara la cobertura de servicios en el Plan Obligatorio de Salud del régimen contributivo y del régimen subsidiado. Cirugía plástica maxilofacial y de otras especialidades descritas en la Resolución 5261 de 1994, siempre que tengan fines reconstructivos funcionales.
- 4.10. Acuerdo 302 de 14 de octubre de 2005. Por medio del cual se incluyen unas prestaciones en el Plan Obligatorio de Salud del régimen contributivo y del régimen subsidiado. Mallas de polipropileno no recubiertas, usadas en los procedimientos de herniorrafia o hernioplastia.
- 4.11. Acuerdo 306 de 16 de agosto de 2005. Por medio del cual se define el Plan Obligatorio de Salud del régimen subsidiado.
- 4.12. Acuerdo 313 de 13 de diciembre de 2005. Por medio del cual se incluye una prestación en el Plan Obligatorio de Salud del régimen contributivo y del régimen subsidiado. Colectomía por vía laparoscópica.



- 4.13. Acuerdo 335 de 6 de julio de 2006. Por el cual se asignan recursos de la Subcuenta de Promoción del Fondo de Solidaridad y Garantía (Fosyga) para el fortalecimiento de programas prioritarios de salud pública y se dictan otras disposiciones. Vacunación contra neumococo y otras actividades.
- 4.14. Acuerdo 336 de 23 de agosto de 2006. Por el cual se actualiza parcialmente el manual de medicamentos del Plan Obligatorio de Salud, se incluyen otras prestaciones en los planes de beneficios de los regímenes contributivo subsidiado, se modifica el valor de la UPC para el 2006 y se dictan otras disposiciones.
- 4.15. Acuerdo 350 de 22 de diciembre de 2006 del CNSSS. Por medio del cual se incluye en el Plan Obligatorio de salud del régimen contributivo y del régimen subsidiado la atención para la interrupción voluntaria del embarazo.
- 4.16. Acuerdo 356 de 22 de marzo de 2007 del CNSSS. Por medio del cual se incluye una prestación en el Plan Obligatorio de Salud del régimen subsidiado-subsidio pleno. Vasectomía o esterilización masculina, como método definitivo de planificación familiar.
- 4.17. Acuerdo 368 de 20 de septiembre de 2007 del CNSSS. Por medio del cual se incluye un medicamento en el Manual de Medicamentos y Terapéutica del Plan Obligatorio de Salud. Lopinavir + ritonavir - 200 mg + 50 mg tabletas.
- 4.18. Acuerdo 380 de 14 de diciembre de 2007 del CNSSS. Por medio del cual se incluyen medicamentos anticonceptivos hormonales y el condón masculino en el Plan Obligatorio de Salud del régimen contributivo y del régimen subsidiado.
5. Circular:
  - 5.1. Ministerio de la Protección Social. Circular Externa N° 10 del 22 de marzo de 2006. Instrucciones sobre la atención oportuna a la población, especialmente cuando está en peligro la vida de los pacientes.
6. Conceptos:
  - 6.1. Dirección General de Gestión de la Demanda en Salud. Concepto emitido en 13 de julio de 2007. Elementos y dispositivos del POS.
  - 6.2. Ministerio de Hacienda y Crédito Público. Dirección de Regulación Económica de la Seguridad Social. Concepto emitido el 7 de septiembre de 2007.
