# Supplementary material
Source: publisher figshare collection journal article supplement (https://tandf.figshare.com/articles/dataset/_/10732607)
Supplement: Supplementary file 1 [file 2 › fjds_a_1690134_sm1295.pdf]

Página 217 de 415  
 Códice 761  
 Votación 11 767

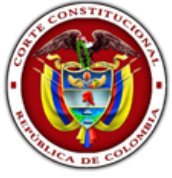

- [Inicio](#)
  - [Comunicados](#)
  - [Orden del día](#)
- [La Corte](#)
  - [Funciones](#)
  - [Reglamento interno](#)
  - [Normatividad](#)
  - [Principios Reguladores](#)
  - [Directorio](#)
  - [Magistrados actuales](#)
  - [Magistrados anteriores](#)
- [Relatoría](#)
- [Secretaría General](#)
  - [Salas de Revisión](#)
  - [Consulta de Procesos](#)
- [Main Decision](#)
- 
- 
- 

Retornar

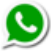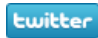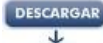

[A245-10](#)

## Auto 245/10

**SENTENCIA DE LA CORTE CONSTITUCIONAL EN MATERIA DE DERECHO A LA SALUD Y LA VIDA**-Advertir a Superintendencia Nacional de Salud que en dos meses debe analizar información de EPS en cumplimiento de sentencia T-760/08

**SENTENCIA DE LA CORTE CONSTITUCIONAL EN MATERIA DE DERECHO A LA SALUD Y LA VIDA**-Ordenar a Superintendencia Nacional de Salud enviar información de servicios negados por EPS en cumplimiento de sentencia T-760/08

**SENTENCIA DE LA CORTE CONSTITUCIONAL EN MATERIA DE DERECHO A LA SALUD Y LA VIDA**-Requerir a Superintendencia Nacional de Salud para que indique resultados de aplicación de Circular Externa 055/09 en cumplimiento de sentencia T-760/08

**SENTENCIA DE LA CORTE CONSTITUCIONAL EN MATERIA DE DERECHO A LA SALUD Y LA VIDA**-Exhortar a Superintendencia Nacional de Salud para que informe sobre sanciones impuestas a EPS por incumplimiento de sentencia T-760/08

**SENTENCIA DE LA CORTE CONSTITUCIONAL EN MATERIA DE DERECHO A LA SALUD Y LA VIDA**-Solicitar a Superintendencia Nacional de Salud informes y evaluaciones a Contrato de Auditoría con Universidad del Valle en cumplimiento de sentencia T-760/08

**SENTENCIA DE LA CORTE CONSTITUCIONAL EN MATERIA DE DERECHO A LA SALUD Y LA VIDA**-Instar a Superintendencia Nacional de Salud para que remita evaluación de investigaciones, trámites y sanciones contra EPS que no han presentado informes o lo han hecho de forma indebida en cumplimiento de sentencia T-760/08

**SENTENCIA DE LA CORTE CONSTITUCIONAL EN MATERIA DE DERECHO A LA SALUD Y LA VIDA**-Remisión Superintendencia Nacional de Salud de informes de cumplimiento sentencia T-760/08

Referencia: seguimiento a la orden décimo novena de la sentencia T-760 de 2008.

Magistrado Ponente:  
JORGE IVÁN PALACIO PALACIO

Bogotá D.C., veintiséis (26) de julio de dos mil diez (2010).

La Sala Especial de Seguimiento conformada por la Corte Constitucional para llevar a cabo el cumplimiento de la sentencia T-760 de 2008, integrada por los magistrados Mauricio González Cuervo, Gabriel Eduardo Mendoza Martelo y Jorge Iván Palacio Palacio, en ejercicio de sus competencias constitucionales y legales, procede a dictar el presente Auto, con base en las siguientes

### I. ANTECEDENTES

1. Mediante Sentencia T-760 del 31 de julio de 2008, la Corte Constitucional profirió diversas órdenes dirigidas a las autoridades del Sistema General de Seguridad Social en Salud, con la finalidad de que fueran adoptadas medidas para corregir sus fallas de regulación.
2. Particularmente, en torno a una de las fallas estructurales del sistema de salud, se dictó la orden décimo novena, que textualmente señala lo siguiente:

*“**Décimo noveno.**- Ordenar al Ministerio de la Protección Social que adopte medidas para garantizar que todas las Entidades Promotoras de Salud habilitadas en el país envíen a la Comisión de Regulación en Salud, a la Superintendencia Nacional de Salud y a la Defensoría del Pueblo, un informe trimestral en el que se indique: (i) los servicios médicos ordenados por el médico tratante a sus usuarios que sean negados por la Entidad Promotora de Salud y que no sean tramitados por el Comité Técnico Científico, (ii) los servicios médicos ordenados por el médico tratante a sus usuarios que sean negados por el Comité Técnico Científico de cada entidad; (iii) indicando en cada caso las razones de la negativa, y, en el primero, indicando además las razones por las cuáles no fue objeto de decisión por el Comité Técnico Científico.*

*El primer informe deberá ser enviado el 1 de febrero de 2009. Copia del mismo deberá ser remitida a la Corte Constitucional antes de la misma fecha.”*

3. En desarrollo de esta orden, la Superintendencia Nacional de Salud, a través de oficio radicado el 12 de febrero de 2009, relacionó las labores adelantadas en cumplimiento de la orden décimo novena y de las diferentes respuestas remitidas por las EPS y las EPS-S. Encontró que sólo el 38.23% (26 EPS de 68 requeridas) acataron la orden de la Corte Constitucional y los requerimientos realizados por el Ministerio de la Protección Social. Por consiguiente, estimó necesario iniciar las actuaciones administrativas correspondientes por la no presentación del informe por las 42 EPS restantes.
4. Como complemento, la Superintendencia remitió el 29 de abril de 2009 el “*Consolidado del primer informe enviado por las EPS*” con el cual manifiesta darle cumplimiento a la orden referida, aclarando que se analizó y evaluó la información presentada con corte a 1º de febrero del mismo año. En su comunicación concluyó que las EPS no tienen claridad acerca de los datos que deben remitir. Por tanto, procedió a definir los parámetros bajo los cuales se deben rendir los informes por parte de las entidades vigiladas, mediante la expedición de la Circular Externa Num. 053 de 2009.

5. Bajo tales condiciones, la Sala Especial de Seguimiento profirió varios Autos el 13 de julio de 2009, mediante los cuales se dio impulso al proceso de seguimiento del cumplimiento de cada una de las órdenes generales de la Sentencia T-760 de 2008.

6. En cumplimiento a lo dispuesto en el Auto del 13 de Julio de 2009, correspondiente a la orden décimo novena, la Superintendencia Nacional de Salud por medio de escrito de fecha 30 de julio de 2009, informó las diferentes actuaciones que se habían iniciado en los respectivos procesos administrativos contra 45 Empresas Administradoras de Planes de Beneficios, mostrando su estado actual, precisó que la mayoría de éstas terminaron en cierres o sanciones que van de 5 a 10 s.m.l.m.v., por presentación extemporánea del informe por parte del ente. De igual forma, comunicó el inicio de las actuaciones administrativas correspondientes en contra de algunas entidades administradoras de planes de beneficios, por omitir el reporte de la información.

Concluyó que luego de constatar que los informes no estaban siendo presentados de manera homogénea según los criterios expuestos en la Circular 053 del 29 de abril de 2009, procedió a derogarla y expedir la Circular 055 del 24 de junio del mismo año, en la que se implementan nuevos campos en los anexos técnicos, con lo cual se permitiría realizar mejor el análisis de la información.

7. Seguido de los anteriores documentos, la Defensoría del Pueblo, mediante oficio del 30 de julio de 2009, manifestó que en relación con la tercera orden del citado Auto, el Ministerio de la Protección Social presentó un informe que relaciona las entidades que no enviaron los reportes o que los enviaron sin los requerimientos establecidos por la Corte Constitucional. Como consecuencia, el Ministerio Público procedió a reportar a estas entidades a la Superintendencia Nacional de Salud, con el fin de que ésta ejerciera su función sancionatoria.

8. Posteriormente, el 3 de agosto de 2009 la Superintendencia Nacional de Salud envió el “*Consolidado del segundo informe enviado por las EPS*” en el cual se examinó y valoró la información presentada a 1º de mayo del mismo año, en la cual se encuentran los documentos presentados por 54 EPS de ambos regímenes.

Dentro de este consolidado se resalta el contrato que la Superintendencia Nacional de Salud celebró con la Universidad del Valle, en busca de “*realizar auditorías de conformidad con las técnicas generalmente aceptadas y los parámetros taxativamente señalados por el Manual de Visita de la Superintendencia Nacional de Salud, a 32 entidades departamentales para verificar el cumplimiento de la Sentencia T -760 de 2008 y el Título I Capítulo VII de la Circular Única de la Superintendencia Nacional de Salud, en aspectos relacionados con el financiamiento de la prestación de los servicios de salud a la población pobre y vulnerable no cubiertos con subsidio a la demanda y lo no POS.*”.

9. Del mismo modo, la Superintendencia Nacional de Salud allegó el 15 de enero de 2010, el “*Consolidado del tercer informe enviado por las EPS*” en el cual se auscultó y estimó la información presentada a 1 de agosto de 2009 por 72 EPS de ambos regímenes. Sin embargo, advirtió que todavía existen 3 de ellas que han hecho caso omiso a la indicación de presentar el reporte en medio magnético y siguen allegándolo en medio físico, lo cual las separa del análisis general que sobre la información se realiza.

## II. CONSIDERACIONES

1. Aprecia la Corte que del contenido de los informes presentados por la Superintendencia se infiere un estudio de los reportes de las EPS que otorgan herramientas valiosas para el seguimiento de la sentencia. No obstante, la evaluación a fondo de dichos documentos será abordada por la Sala Especial con posterioridad a esta providencia.

Por el momento, esta Sala encuentra que en la información remitida, la Superintendencia no especifica el periodo que comprenden los datos analizados en los informes anteriormente referenciados, por esta razón no se pueden inferir las fechas exactas en las que se negaron los servicios NO-POS.

De igual forma, observa con preocupación que de conformidad con las fechas de corte y de radicación de los informes, la Superintendencia se ha tomado entre tres y cinco meses para analizar la información, tiempo que

excede el razonable para este tipo de labor. Si los informes enviados por las EPS tienen una periodicidad de tres meses, considera la Corte que es necesario evaluar y estudiar tal documentación en un término menor, de máximo 2 meses, confinado a que el cumplimiento de la Sentencia T-760/08 se torne más ágil y eficiente.

11. Asimismo, la Sala emitirá órdenes tendientes a la verificación y adecuado cumplimiento de las diferentes variables adscritas al numeral 19 de la parte resolutive de la Sentencia T-760 de 2008. Particularmente ordenará que la Superintendencia Nacional de Salud remita la información actualizada correspondiente al periodo enero a abril del 2010; que indique los resultados de la aplicación de la Circular Externa 055 del 24 de junio de 2009; que relacionen las sanciones impuestas a las EPS tanto del régimen subsidiado como del contributivo, por el incumplimiento de la orden décimo novena; que allegue los informes y evaluaciones efectuados sobre el Contrato de Auditoría celebrado con la Universidad del Valle; que se evalúe la efectividad de las investigaciones adelantadas y las sanciones que se hayan impuesto y que se remita cada uno de los informes pasados y futuros a la Comisión de Regulación de Salud y a la Defensoría del Pueblo.

En mérito a lo expuesto, la Sala Especial de Seguimiento,

### III. RESUELVE:

**PRIMERO.** A través de la Secretaría General de esta Corporación, ADVERTIR a la Superintendencia Nacional de Salud que el término que debe utilizar para el análisis de la información entregada por las EPS, no debe exceder de dos meses.

**SEGUNDO.** A través de la Secretaría General de esta Corporación, ORDENAR a la Superintendencia Nacional de Salud, que en el lapso de diez (10) días, envíe la información actualizada correspondiente al periodo enero a abril del 2010, acerca de los Servicios Negados por parte de las EPS de ambos regímenes.

**TERCERO.** A través de la Secretaría General de esta Corporación, REQUERIR a la Superintendencia Nacional de Salud, para que en el término de cinco (05) días: (i) indique los resultados de la aplicación de la Circular Externa 055 del 24 de junio de 2009, (ii) exponga sus debilidades y fortalezas y (iii) comunique a esta Corporación si la información remitida es útil para cumplir con los objetivos de la orden décimo novena de la Sentencia T-760 de 2008.

**CUARTO.** A través de la Secretaría General de esta Corporación, EXHORTAR a la Superintendencia Nacional de Salud, para que en el término de cinco (05) días, informe a esta Corporación, a la Defensoría del Pueblo, a la Procuraduría General de la Nación y a la Comisión de Regulación de Salud cuáles fueron las sanciones impuestas a las EPS tanto del régimen subsidiado como del contributivo, por el incumplimiento de la orden décimo novena de la Sentencia T-760 de 2008.

**QUINTO.** A través de la Secretaría General de esta Corporación, SOLICITAR a la Superintendencia Nacional de Salud, que en el término de cinco (05) días, allegue los informes y evaluaciones efectuadas sobre el Contrato de Auditoría celebrado con la Universidad del Valle.

**SEXTO.** A través de la Secretaría General de esta Corporación, INSTAR a la Superintendencia Nacional de Salud, para que en el término de diez (10) días remita a esta Corporación, a la Defensoría del Pueblo, a la Procuraduría General de la Nación y a la Comisión de Regulación de Salud una evaluación pormenorizada acerca de si las investigaciones, trámites y sanciones adelantados contra las EPS que no han presentado los informes o lo han hecho de forma indebida, han sido realmente efectivas y eficaces para lograr el cumplimiento de la orden a la que se refiere esta providencia.

**SÉPTIMO.** A través de la Secretaría General de esta Corporación, PEDIR a la Superintendencia Nacional de Salud que remita los informes relativos al cumplimiento de la orden 19 de la Sentencia T-760 de 2008 pasados y futuros a la Defensoría del Pueblo, a la Procuraduría General de la Nación y a la Comisión de Regulación de Salud.

Notifíquese, Comuníquese y Cúmplase.

MAURICIO GONZÁLEZ CUERVO  
Magistrado

GABRIEL EDUARDO MENDOZA MARTELO  
Magistrado

JORGE IVÁN PALACIO PALACIO  
Magistrado

MARTHA VICTORIA SÁCHICA MÉNDEZ  
Secretaria General
