# Supplementary material
Source: publisher figshare collection journal article supplement (https://tandf.figshare.com/articles/dataset/_/10732607)
Supplement: Supplementary file 1 [file 2 › fjds_a_1690134_sm1346.pdf]

**NOTA DE RELATORIA:** Mediante auto 522 de fecha 11 de noviembre del 2015, el cual se anexa en la parte final de la presente providencia, se dispone reemplazar con datos ficticios, los nombres y datos de identificación del peticionario en el expediente T-1315769

## **Sentencia T-760/08**

**DERECHO A LA SALUD**-Es un derecho fundamental

**DERECHO FUNDAMENTAL A LA SALUD**-Comprende, entre otros, el derecho a acceder a servicios de salud de manera oportuna, eficaz y con calidad

**DERECHO A LA SALUD**-Debe ser respetado por las entidades responsables de asegurar y prestar servicios de salud - IPS y EPS –

**DERECHO A LA SALUD**-Circunstancias en que es tutelable

**DERECHO A LA SALUD**-Órganos de regulación y vigilancia del Sistema, tienen el deber de adoptar las medidas para proteger el derecho a la salud

**DERECHO A LA SALUD**-Fallas en la regulación por parte del Consejo Nacional de Seguridad Social en Salud, la Comisión de Regulación de la Salud y El Ministerio de Protección Social

**DERECHO A LA SALUD**-Ordenes de la Corte Constitucional encaminadas a asegurar que se proteja de manera efectiva el derecho a la salud

**DERECHO A LA SALUD**-Omisiones por parte de los entes de vigilancia del sistema - Superintendencia de Salud

**DERECHO A LA SALUD**-Servicios de salud que se requieren, de acuerdo con el concepto del médico tratante, en especial si el servicio ha sido ordenado en beneficio de un niño o una niña

**DERECHO A LA SALUD**-Protección cuando el acceso al servicio ha sido obstaculizado mediante la exigencia previa de que se paguen sumas de dinero, si se carece de capacidad económica

**DERECHO A LA SALUD**-Protección cuando el servicio requerido es un examen o prueba diagnóstica

**DERECHO A LA SALUD**-Protección cuando la persona incumplió el pago de las cotizaciones a la salud, y la EPS se allanó a la mora

**DERECHO A LA SALUD**-Protección cuando el servicio se requiere para enfrentar enfermedades catastróficas y de alto costo

**DERECHO A LA SALUD**-Protección cuando el servicio ha sido interrumpido súbitamente

**DERECHO A LA SALUD**-Protección cuando la EPS, o la entidad del sector de salud encargada, no brinda la información, acompañamiento y seguimiento necesario para poder asegurar a la persona el acceso a un servicio de salud que requiere

**DERECHO A LA SALUD**-Protección cuando se obstaculiza el acceso al servicio, al trasladarle al usuario cargas administrativas y burocráticas que le corresponde asumir a la EPS

**DERECHO A LA SALUD**-Protección cuando el servicio solicitado hace parte integral de un tratamiento que se está recibiendo o que se tiene derecho a recibir

**DERECHO A LA SALUD**-Protección cuando se obstaculiza a la persona la libertad de elegir la entidad a la cual se puede afiliar

**DERECHO A LA SALUD Y PLANES DE BENEFICIOS**-Reforma, actualización periódica y adecuación para que el POS y el POSS respondan a las necesidades de salud de la población

**DERECHO A LA SALUD**-Corte Constitucional ordena adoptar medidas para eliminar la incertidumbre acerca del contenido de los planes de beneficios y lograr la actualización periódica de los mismos

**DERECHO A LA SALUD**-Corte Constitucional ordena adoptar medidas para unificar los planes de beneficios (POS y POSS), primero en el caso de los niños y, luego, progresivamente en el caso de los adultos teniendo en cuenta su adecuada financiación

**DERECHO A LA SALUD**-Corte Constitucional ordena adoptar medidas para ampliar las competencias del Comité Técnico Científico de cada EPS

**DERECHO A LA SALUD**-Comité Técnico Científico de cada EPS también debe pronunciarse respecto a si se aprueban o niegan solicitudes de servicios médicos diferentes a medicamentos en cualquiera de los regímenes

**DERECHO A LA SALUD**-Corte Constitucional ordena adoptar medidas para evitar que se rechace o se demore la prestación de los servicios médicos que sí se encuentran incluidos en el POS

**DERECHO A LA SALUD**-Flujo de recursos al Sistema de salud

**DERECHO A LA SALUD**-Goce efectivo del derecho

**DERECHO A LA SALUD**-Financiación sostenible y oportuna

**DERECHO A LA SALUD**-Corte Constitucional ordena agilizar la ejecución de las sentencias de tutela

**DERECHO A LA SALUD**-Corte Constitucional ordena adoptar un plan de contingencia para asegurar los pagos de los recobros atrasados en el FOSYGA

**DERECHO A LA SALUD**-Corte Constitucional ordena corregir las trabas en el sistema de recobros, como la definición del momento de ejecutoria de las sentencias de tutela y las llamadas “glosas”

**DERECHO A LA SALUD**-Corte Constitucional ordena proteger el derecho a la información, mediante la distribución a las personas afiliadas de una carta de derechos de los usuarios y una carta de desempeño de las entidades del sector de la salud

**DERECHO A LA SALUD**-Carta de derechos de los usuarios

**DERECHO A LA SALUD**-Carta de desempeño de las entidades del sector de la salud

**DERECHO A LA SALUD**-Corte Constitucional ordena adoptar medidas para que progresivamente se alcance la cobertura universal del Sistema antes de enero de 2010

**DERECHO A LA SALUD**-Indicadores de gestión y de resultados en el ámbito de la salud deben incorporar la medición del goce efectivo del derecho a la salud por parte de las personas

**DERECHO A LA SALUD**-Corte Constitucional ordena que antes del 1 de Febrero de 2009 se presente el primer informe sobre disminución de acciones de tutela

**DERECHO A LA SALUD**-Informe sobre disminución de acciones de tutela deben indicar cómo las personas pueden acceder de manera oportuna a los servicios de salud ordenados por el médico tratante sin tener que esperar a que se resuelva en su favor la tutela

**DERECHO A LA SALUD**-Regulación en materia de recobros al Fosyga

**DERECHO A LA SALUD**-Noción de salud

**DERECHO A LA SALUD**-Facetas positivas y negativas derivadas del derecho a la salud

**DERECHO A LA SALUD**-Jurisprudencia sobre la protección de los derechos fundamentales, a propósito de las obligaciones de contenido prestacional

**DERECHO A LA SALUD**-Caracterización del derecho a la salud en el bloque de constitucionalidad

**DERECHO A LA SALUD**-clases de obligaciones derivadas del derecho a la salud: *respetar, proteger y garantizar*

**DERECHO A LA SALUD**-Los límites del derecho a la salud y ejemplos de limitaciones en el acceso a servicios.

**DERECHO FUNDAMENTAL A LA SALUD**-Comprende la garantía de acceso a servicios de salud de calidad y de manera oportuna y eficaz

**DERECHO A LA SALUD**-Existencia de un Sistema de Salud que garantice el acceso a los servicios de salud

**DERECHO A LA SALUD**-Pertenencia al Sistema y garantía de la prestación de servicios de salud

**DERECHO A LA SALUD**-Conocimiento de la información adecuada y necesaria para acceder a los servicios de salud con libertad y autonomía

**DERECHO A LA SALUD**-Derecho a que las entidades responsables garanticen el acceso a los servicios de salud con calidad, eficacia y oportunidad

**DERECHO A LA SALUD**-El derecho a acceder a los servicios que se ‘requieran’

**DERECHO A LA SALUD**-El concepto científico del médico tratante es el principal criterio para establecer si se requiere un servicio de salud, pero no es exclusivo

**DERECHO A LA SALUD**-Acceso a los servicios de salud, incluidos y no incluidos dentro de los planes obligatorios

**DERECHO A LA SALUD**-Regla para solucionar conflictos entre el médico tratante y el Comité Técnico Científico

**DERECHO A LA SALUD**-Los pagos, además de ser razonables, no pueden constituir barreras de acceso a los servicios de salud para quienes no tienen la capacidad económica de sufragarlos

**DERECHO A LA SALUD**-Los pagos moderadores no pueden constituir barreras al acceso a los servicios de salud

**DERECHO A LA SALUD**-La financiación de los servicios de salud no contemplados dentro de los planes obligatorios, en cada caso concreto

**DERECHO A LA SALUD**-Determinación de la capacidad económica, en cada caso concreto y concepto de carga soportable

**DERECHO A LA SALUD**-La falta de capacidad económica puede ser temporal o permanente

**DERECHO A LA SALUD**-Reglas probatorias para establecer la capacidad económica

**DERECHO A LA SALUD**-No se puede dejar de proteger el derecho a la salud por falta de pruebas

**DERECHO A LA SALUD**-Las entidades del sector de la salud no pueden obstaculizar el acceso a los servicios de salud, para obtener el pago del servicio

**DERECHO A LA SALUD**-No se puede negar el acceso a un servicio de salud, por omitir el pago de algunas cotizaciones, cuando la entidad se allanó a la mora al recibir nuevos pagos

**DERECHO A LA SALUD**-El deber de solidaridad y de asumir cargas soportables.

**DERECHO A LA SALUD**-El principio de integralidad y la obligación de que la prestación de los servicios sea oportuna, eficiente y de calidad

**DERECHO A LA SALUD**-Las entidades deben garantizar integralmente el acceso a los servicios de salud requeridos

**DERECHO A LA SALUD**-El transporte y la estadía como medio para acceder a un servicio

**DERECHO A LA SALUD**-Deber de garantizar el acceso a los servicios de salud, libre de trámites y procedimientos administrativos engorrosos e innecesarios

**DERECHO A LA SALUD**-Por el principio de continuidad, el acceso a un servicio de salud debe ser continuo, y no puede ser interrumpido súbitamente

**DERECHO A LA SALUD**-Acceso a los servicios de salud que requieren

los sujetos de especial protección constitucional, como las niñas y los niños

**DERECHO A LA SALUD**-El derecho a la salud comprende el derecho a acceder a los servicios de salud que se *requieran con necesidad*

**DERECHO A LA SALUD**-acceso de un menor a un servicio no incluido en el POS y caso de implante coclear

**DERECHO A LA SALUD**-Caso de mamoplastia y acceso a un servicio de salud necesario para preservar la vida o la integridad personal no incluido en el POS, cuando no se tiene la capacidad económica para costearlo

**DERECHO A LA SALUD**-Medicamentos para diabetes y acceso a servicios de salud no incluidos en el POS

**DERECHO A LA SALUD**-Exámenes diagnósticos y acceso a servicios de salud de persona vinculada al Sistema de salud

**DERECHO A LA SALUD**-Resonancia magnética de la columna y acceso a servicio de salud no incluido dentro del POSS

**DERECHO A LA SALUD**-Trasplante de tráquea y medios necesarios para que una persona vinculada acceda a un servicio de salud en lugar distinto a su domicilio

**DERECHO A LA SALUD**-Ausencia de reglamentación para autorizar oportuna y prontamente los servicios médicos distintos a medicamentos no excluidos, que se requieran y no estén incluidos en el plan obligatorio de salud aplicable

**DERECHO A LA SALUD**-Los pagos moderadores no pueden ser una barrera que dificulte, postergue o impida el acceso a los servicios de salud que se requieran

**DERECHO A LA SALUD**-Protección especial del derecho a acceder a los servicios de salud de las niñas y los niños

**DERECHO A LA SALUD**-Entidad encargada de garantizar el derecho a la salud sólo puede desconocer el concepto de un médico reconocido que no está adscrito a su red de prestadores, cuando su posición se funda en razones médicas especializadas sobre el caso

**DERECHO A LA SALUD**-El derecho de acceder a los servicios incluidos en el plan obligatorio, no puede ser obstaculizado alegándose incumplimiento en ciertos pagos, cuando la entidad se allana a la mora, al recibir nuevos pagos

**DERECHO A LA SALUD**-El acceso a los servicios de salud que se *requieran*, está especialmente garantizado a las personas que padecen enfermedades catastróficas o de alto costo

**DERECHO A LA SALUD**-La limitación a la libertad de afiliación de las personas que padecen enfermedades catastróficas no debe impedir que la persona pueda acceder a los servicios de salud que *requiere*, con calidad, oportuna e idóneamente

**DERECHO A LA SALUD**-Un órgano del Estado viola el derecho de petición cuando no responde con congruencia y de fondo la solicitud de una entidad o institución del sector

**DERECHO A LA SALUD**-Obligación de responder con congruencia y de fondo, en especial si la petición va orientada a garantizar el goce efectivo del derecho a la salud de afiliados y beneficiarios del sistema

**DERECHO A LA SALUD**-Las dudas acerca de lo que se encuentra incluido o no en el POS deben ser interpretadas conforme al principio de integralidad, mientras no exista un mecanismo institucional para resolverlas

**DERECHO A LA SALUD**-Problemas recurrentes constatados dentro de un patrón de violaciones al derecho a la salud

**DERECHO A LA SALUD**-Órdenes a los órganos de regulación para garantizar el goce efectivo del derecho a la salud

**DERECHO A LA SALUD**-Ordenes relacionadas con los planes de beneficios

**DERECHO A LA SALUD**-Medidas para eliminar la incertidumbre acerca del contenido de los planes de beneficios y actualización periódica de los mismos

**DERECHO A LA SALUD**-Unificación del Plan de Beneficios

**DERECHO A LA SALUD**-Unificación inmediata del Plan de Beneficios en el caso de niños y Diseño de un programa y cronograma en el caso de adultos

**DERECHO A LA SALUD**-Ampliación de las competencias del Comité Técnico Científico para que también se pronuncie sobre solicitudes de servicios médicos diferentes a medicamentos en cualquiera de los regímenes

**DERECHO A LA SALUD**-Medidas para evitar que se rechace o se

demore la prestación de los servicios médicos que sí se encuentran incluidos en el POS

**DERECHO A LA SALUD**-Ordenes relacionadas con el derecho al recobro de servicios médicos no cubiertos por el plan de beneficios ante el Fosyga o las entidades territoriales

**DERECHO A LA SALUD**-Orden para agilizar la ejecución de las sentencias de tutela

**DERECHO A LA SALUD**-Orden relativa a la adopción de un plan de contingencia

**DERECHO A LA SALUD**-Orden de corregir las trabas en el sistema de recobros

**DERECHO A LA SALUD**-Carta de derechos, carta de desempeño y órdenes de la Corte Constitucional para proteger el derecho a la información en salud

**DERECHO A LA SALUD**-Órdenes de la Corte Constitucional sobre cobertura universal

**DERECHO A LA SALUD**-Temas relacionados con la protección del derecho a la salud en los cuales no se profieren órdenes atinentes a la regulación

**DERECHO A LA SALUD**-Reducción de la presentación de acciones de tutela para acceder a los servicios de salud como indicador del cumplimiento de esta sentencia

**DERECHO A LA SALUD**-Acceso a servicio de salud incluido en el POS, sometido a pagos moderadores y caso de coronariografía con cateterismo izquierdo y ventriculografía

**DERECHO A LA SALUD**-Reconocimiento de incapacidades, cuando los aportes a Salud fueron extemporáneos y a la vez aceptados por la EPS

**DERECHO A LA SALUD**-Acceso a servicio de salud incluido en el POS, sometido a pagos moderadores y caso de carga viral

**DERECHO A LA SALUD**-Acceso de niña vinculada al sistema a un servicio de salud y caso de mamoplastia

**DERECHO A LA SALUD**-Acceso a servicios de salud no incluidos en el POS, solicitud ante el Comité Técnico Científico y caso de medicamentos para diabetes

**DERECHO A LA SALUD**-Acceso a servicios de salud de persona vinculada al Sistema de salud y caso de exámenes diagnósticos

**DERECHO A LA SALUD**-Acceso a servicio de salud no incluido dentro del POSS y caso de resonancia magnética de la columna

**DERECHO A LA SALUD**-Medios necesarios para que una persona vinculada acceda a un servicio de salud en lugar distinto a su domicilio

**DERECHO A LA SALUD**-Libertad de elección y de traslado entre las entidades del Sistema de Salud

**DERECHO A LA SALUD**-Reglas de recobro

**DERECHO A LA SALUD**-Suministro del lente intraocular está incluido en el POS y debe ser provisto por parte de las EPS sin derecho a solicitar reembolso al Fosyga

**DERECHO A LA SALUD**-Pactos Internacionales de derechos Humanos y desarrollo de los instrumentos de protección de derechos, regionales e internacionales para sujetos de protección especial

**DERECHO A LA SALUD**-La defensa del derecho fundamental a la salud y desarrollo interpretativo de los textos que consagran la Carta Internacional de Derechos Humanos

**DERECHO A LA SALUD**-Convención internacional sobre la protección de los derechos de todos los trabajadores migratorios y de sus familiares

**DERECHO A LA SALUD**-Principios para la protección de los enfermos mentales y el mejoramiento de la atención de la salud mental

**DERECHO A LA SALUD**-Declaración y Programa de acción de Viena de 1993, de la Conferencia Mundial de Derechos Humanos y énfasis en que todos los derechos humanos son universales, indivisibles e interdependientes y están relacionados entre sí

**DERECHO A LA SALUD**-Recomendación general N° 24 de 1999 sobre ‘la mujer y la salud, adoptada por el Comité para la Eliminación de la Discriminación contra la Mujer de las Naciones Unidas

Referencia: expedientes T-1281247, T-1289660, T-1308199, T-1310408, T-1315769, T-1320406, T-1328235, T-1335279, T-1337845, T-1338650, T-1350500, T-1645295, T-1646086, T-1855547, T-1858995, T-1858999, T-1859088, T-1862038,

T-1862046, T-1866944, T-1867317, y T-1867326

Acciones de tutela instauradas por Luz Mary Osorio Palacio contra Colpatria EPS; Marlene Betancourt Mosquera contra SaludCoop EPS; Máximo Daniel Cuello Urzola contra el Seguro Social EPS, Seccional Cesar; Angélica María Rojas Castrillón contra Famisanar EPS; *Eduardo* contra Comfenalco EPS; Mariela del Socorro Castilla Fernández contra la Clínica Cardiovascular Jesús de Nazareth y el Departamento Administrativo Distrital de Salud, DADIS; María Diva Almonacid de Martínez contra Colmédica EPS; Nasly Sánchez Zapatero, Personera Distrital Delegada en Derechos Humanos en Cartagena, contra el Departamento Administrativo Distrital de Salud, DADIS; Olga Patricia Palacio Villa contra ECOOPSOS, Entidad Cooperativa Solidaria de Salud; Mario Reyes Acevedo contra la Secretaría de Salud del Departamento del Cesar; Jairo Eduardo Yepes Pérez contra el Seguro Social EPS y Coomeva EPS; y Sanitas EPS contra la Sala Administrativa del Consejo Superior de la Judicatura y contra el Ministerio de la Protección Social; Carlos Cortes Cortes contra Coomeva EPS; Carmen Raquel Betancourt de Villalobos contra Saludcoop EPS; Elvia Sánchez de Alonso contra Sanitas EPS; Enrieta Dolores Rodríguez Martes contra Saludcoop EPS; Alba Isabel Pinto de Monroy contra Saludcoop EPS; Alfonso Carmelo Villamil Fernández contra Salud total EPS; Enrique del Carmen Martínez Muñoz contra Saludcoop EPS; Mery Restrepo de Zuluaga contra Cafesalud EPS; Rosario Hincapié Salazar contra Saludvida EPS.

Magistrado Ponente:  
Dr. MANUEL JOSÉ CEPEDA ESPINOSA

Bogotá, DC, treinta y uno (31) de julio de dos mil ocho (2008)

La Sala Segunda de Revisión de la Corte Constitucional, integrada por los magistrados, Manuel José Cepeda Espinosa, Jaime Córdoba Triviño y Rodrigo Escobar Gil, en ejercicio de sus competencias constitucionales y legales, ha proferido la siguiente

**SENTENCIA**

en el proceso de revisión de las sentencias adoptadas por el Juzgado 11 Civil del Circuito de Cali (T-1281247), el Juzgado 5° Penal Municipal de Cali (T-1289660), la Sala Civil, Familia, Laboral, del Tribunal Superior de Valledupar (T-1308199), el Juzgado 10° Penal Municipal de Barranquilla (T-1310408); el Juzgado 13 Civil Municipal de Medellín (T-1315769); el Juzgado 12 Civil Municipal de Cartagena (T-1320406); el Juzgado 38 Civil Municipal de Bogotá (T-1328235); el Juzgado 12 Civil Municipal de Cartagena (T-1335279); el Juzgado Primero Penal Municipal de Rionegro (T-1337845); la Sala Primera de Familia del Tribunal Superior de Medellín (T-1338650); la Sala Octava de Decisión Civil del Tribunal Superior de Medellín (T-1350500); la Sala Civil de la Corte Suprema de Justicia (T-1645295 y T-1646086); el Juzgado Primero Penal Municipal de Tulúa, Valle (T-1855547); el Juzgado Cuarto Penal Municipal de Barranquilla, Atlántico (T-1862046); el Juzgado Primero Municipal de Ibagué, Tolima (T-1866944); el Juzgado Cuarto Civil Municipal de Barranquilla, Atlántico (T-1867317); el Juzgado Veintitrés Civil Municipal de Cali, Valle (T-1862038); el Juzgado Décimo Penal Municipal de Barranquilla, Atlántico (T-1858999); el Juzgado Décimo Penal Municipal de Barranquilla, Atlántico (T-1858995); el Juzgado Segundo Civil Municipal de Barranquilla, Atlántico (T-1859088); el Juzgado Segundo de Familia de Medellín, Antioquia (T-1867326) dentro de los respectivos procesos de acción de tutela.

La presente sentencia consta de cuatro partes principales, a saber (I) la exposición de los *antecedentes* de cada uno de los casos acumulados al presente proceso, (II) la relación de las *pruebas decretadas por la Sala* de Revisión. Estos dos apartados figuran en el anexo, el cual constituye parte integral de la presente sentencia. Las otras dos partes son (III) las *consideraciones y fundamentos* de ésta, a propósito de los casos, apreciados individual y conjuntamente; y (IV) las *decisiones* adoptadas. En la primera parte se presenta de forma detallada y pormenorizada cada uno de los procesos de acción de tutela acumulados, y en la segunda, un listado de las pruebas decretadas por la Sala y aportadas por las partes. No obstante, en la tercera parte, dedicada a las consideraciones y fundamentos de la Sala de Revisión, también se hace una presentación de cada uno de los casos, incluyendo la información de los antecedentes y de las pruebas decretadas que sea relevante para decidir. Por tanto, las dos primeras partes de la sentencia (*antecedentes* y relación de *pruebas*) proveen información detallada sobre las descripciones fácticas plasmadas en la tercera y la cuarta parte (*consideraciones y fundamentos*, y *decisión*), cuyo sentido puede ser comprendido autónomamente.

## **I. ANTECEDENTES**

Los antecedentes y las pruebas correspondientes a los procesos de acción de tutela revisados, así como las decretadas por la Sala de Revisión, son recogidos en el primer anexo a la presente sentencia, el cual forma parte integral de la misma.

## **II. Consideraciones y fundamentos**

### **1. Competencia**

La Sala se considera competente para la revisión del caso, con fundamento en los artículos 86 y 241, numeral 9° de la Constitución Política y los artículos 1° a 36 del Decreto 2591 de 1991, en cumplimiento del Auto del 25 de abril de 2007, proferido por la Sala de Selección de Tutelas número cuatro de la Corte Constitucional.

### **2. Planteamiento de los problemas jurídicos y resumen de las decisiones**

En la presente sentencia, la Corte Constitucional aborda varios casos en los que se invoca la protección del derecho a la salud –concretamente, el acceso a servicios de salud que se requieren–, cuya solución ha sido clara y reiterada en la jurisprudencia de esta Corporación. Estos casos se refieren a diversas situaciones en las cuales el acceso a los servicios de salud requerido fue negado. Estas situaciones son las siguientes: acceso a servicios de salud contemplados en el plan obligatorio de salud, POS, sometidos a pagos moderadores; acceso a servicios de salud no incluidos dentro del POS; acceso a los servicios de salud que requiere un menor para su adecuado desarrollo; reconocimiento de incapacidades laborales cuando no se cumplen los requisitos de pago oportuno; acceso a los servicios de salud en condiciones de integralidad; acceso a los servicios de salud de alto costo y para tratar enfermedades catastróficas, así como a los exámenes diagnósticos; acceso a los servicios de salud requeridos por personas vinculadas al Sistema de Salud, en especial si se trata de menores; acceso a los servicios de salud cuando se requiere desplazarse a vivir en lugar distinto a aquel en que reside la persona; libertad de elección de la *‘entidad encargada de garantizarle el acceso a la prestación de los servicios de salud’* y duda acerca de la inclusión del lente intraocular en el POS y procedencia del recobro. También fueron repartidos a esta Sala casos en los cuales alguna EPS pedía el reembolso oportuno de los gastos de un servicio médico no cubierto por el POS.

A medida que estos fueron llegando a la Corte, fueron solucionados mediante autos en los que se adoptaron como medidas cautelares las órdenes adecuadas y necesarias para garantizar los derechos de las personas, de acuerdo a las reglas jurisprudenciales aplicables. Los casos en cuestión fueron acumulados entre sí para ser fallados en conjunto, teniendo en cuenta la unidad temática entre éstos. La Sala resolverá confirmar las medidas cautelares adoptadas en cada uno de los casos, reiterando además, en la parte resolutive, la jurisprudencia aplicable.

El propósito de acumular estos procesos es doble. Por un lado, tener una muestra lo más comprensiva posible del tipo de problemas que han llevado a los tutelantes a acudir a la justicia constitucional para obtener la satisfacción de sus derechos (*ver capítulo 5*). Así, los problemas van desde el acceso

efectivo al sistema de salud hasta la financiación de los servicios médicos no POS, pasando por la dificultad en resolver los desacuerdos entre los interesados sin acudir a la acción de tutela. Estos problemas han llevado a que la mayor proporción de acciones de tutela que se presentan en el país versen sobre el derecho a la salud, sin que las órdenes que ha impartido la Corte, caso por caso, así como todos los jueces del país, hayan conducido a la superación de tales problemas. En realidad, los órganos responsables de lo que podría denominarse genéricamente la regulación del sistema de salud no han adoptado decisiones que les garanticen a las personas su derecho a la salud sin tener que acudir a la acción de tutela. No obstante, en los últimos años se han adoptado medidas importantes cuya trascendencia e impacto aún no es apreciable, como se resalta más adelante en esta sentencia (*ver capítulo 6*).

De otro lado, la acumulación de procesos permite a la Corte analizar diferentes facetas del derecho a la salud y valorar sus implicaciones siempre con la finalidad de garantizar el goce universal, equitativo y efectivo de este derecho. Esto se refleja en los apartes de esta sentencia sobre las características constitucionales del derecho a la salud donde se hace una recopilación de algunas de las reglas constitucionales pertinentes que sobre el derecho a la salud, en especial, el derecho de acceso a los servicios de salud (*ver capítulos 3 y 4*).

Como resultado de esta visión de conjunto, tanto de los problemas de regulación como de las facetas pertinentes del derecho a la salud, la Corte ha identificado dos tipos de problemas jurídicos a resolver en el presente caso, de carácter concreto o de carácter general.

## **2.1. Problemas jurídicos concretos**

El primer tipo de problemas, los concretos, se plantean a partir de los hechos de un caso específico. A continuación se formula cada uno de los problemas, indicando la respuesta de la Sala a cada uno, de acuerdo con la jurisprudencia constitucional aplicable, y señalando cuales son los procesos acumulados en los que se suscita dicho problema.

2.1.1. ¿Desconoce el derecho a la salud una entidad encargada de garantizar la prestación de los servicios ordenados por el médico tratante, cuando no autoriza a una persona un servicio que *requiere* y no puede costearlo por sí misma, por el hecho de que no se encuentra incluido en el plan obligatorio de salud? La Sala, reiterando jurisprudencia constitucional aplicable, señalará que una entidad encargada de garantizar la prestación de servicios viola el derecho a la salud de una persona cuando no autoriza un servicio que *requiera*, únicamente invocando como razón para la negativa el hecho de que no esté incluido en el plan obligatorio de servicios (*ver apartado 4.4.3.*). Toda persona tiene el derecho constitucional a acceder a los servicios de salud que *requiera con necesidad*, es decir, que hayan sido ordenados por el médico tratante que ha valorado científicamente la necesidad del mismo y que el interesado no tiene para costearlo por sí mismo la capacidad económica (porque su costo es

impagable por el interesado dado su nivel de ingreso o le impone una carga desproporcionada para él). Esta decisión se aplicará en los procesos de los expedientes T-1281247, T-1310408, T-1320406, T-1328235, T-1335279, T-1337845 y T-1338650. Además, una EPS viola el derecho a la salud de una persona, cuando le niega el acceso al servicio con base en el argumento de que la persona no ha presentado la solicitud al Comité Técnico Científico; *‘Las EPS no pueden imponer como requisito de acceso a un servicio de salud el cumplimiento de cargas administrativas propias de la entidad’* (ver apartado 4.4.4). Con esta variante específica, se aplicará el precedente judicial en el caso del expediente T-1328235.

2.1.2. ¿Desconoce el derecho a la salud de una persona una entidad que no le autoriza el acceso a un servicio de salud que aquella requiere, hasta tanto no cancele el pago moderador que corresponda reglamentariamente, incluso si la persona carece de la capacidad económica para hacerlo? Frente a este problema, de acuerdo con la jurisprudencia constitucional, la Sala reitera que una entidad encargada de garantizar la prestación de los servicios de salud a una persona *irrespet*a su derecho a acceder a éstos, si le exige como condición previa que cancele un pago moderador el interesado que no tiene la capacidad económica de asumir (ver apartado 4.4.5.). Esta decisión se aplicará en el expediente T-1289660.

2.1.3. ¿Desconoce el derecho a la salud, especialmente, una entidad encargada de garantizar la prestación de los servicios requeridos, cuando no autoriza a un niño o una niña un servicio que requiere y sus responsables no lo pueden costear, por el hecho de que no se encuentra incluido en el plan obligatorio de salud o porque la vida o la integridad personal del menor no dependen de la prestación del servicio? La respuesta a este problema es afirmativa. De acuerdo con la jurisprudencia constitucional (ver sección 4.5.), el derecho a la salud se viola especialmente, cuando el *servicio requerido con necesidad* es negado a una niña o a un niño, sujetos de especial protección constitucional. Esta decisión se reiterará en los expedientes T-1281247 y T-1320406.

2.1.4. ¿Desconoce el derecho a la salud de una persona, la entidad encargada de garantizarle la prestación del servicio requerido cuando fue ordenado por un médico que no está adscrito a la entidad respectiva, pero es especialista en la materia y trataba a la persona? Ahora bien, el expediente en el que esta cuestión se plantea, contempla un segundo problema relacionado con aquel (expediente T-1281247): ¿puede el juez de tutela considerar que la entidad de salud encargada de garantizar la prestación del servicio no violó el derecho de una persona, únicamente por el hecho de que fue ordenado por un médico no adscrito a la entidad, incluso cuando la entidad acusada nunca lo negó por esa razón, ni se aportaron razones médicas al proceso en tal sentido? Con base en su jurisprudencia, la Sala reiterará que cuando (i) existe un concepto de un médico que no está adscrito a la entidad encargada de garantizar la prestación, (ii) que es un profesional reconocido que hace parte del Sistema de Salud y (iii) que la entidad no ha desvirtuado dicho concepto, con base en razones científicas que consideren el caso específico del paciente, corresponde a la

entidad someter a evaluación médica interna al paciente en cuestión y, si no se desvirtúa el concepto del médico externo, atender y cumplir entonces lo que éste manda. No obstante, ante un claro incumplimiento, y tratándose de un caso de especial urgencia, el juez de tutela puede ordenar directamente a la entidad encargada que garantice el acceso al servicio de salud ordenado por el médico externo, sin darle oportunidad de que el servicio sea avalado por algún profesional que sí esté adscrito a la entidad respectiva (*ver apartado 4.4.2.*). Esta decisión se aplicará en los expedientes T-1281247 y T-1310408.

2.1.5. ¿Desconoce el derecho a la salud de una persona, la entidad encargada de garantizarle el acceso a una prestación social derivada de su estado de salud (incapacidades laborales), cuando se niega a autorizarlo porque en el pasado no se cumplió con la obligación de cancelar los aportes de salud dentro del plazo establecido para ello? Con base en la jurisprudencia constitucional, la Sala reiterará que la acción de tutela es procedente, de manera excepcional, para reclamar el pago de incapacidades laborales, por la importancia que estas prestaciones revisten para la garantía de los derechos fundamentales del trabajador al mínimo vital, a la salud y a la dignidad humana (*ver apartado 4.4.5.8.*). Específicamente, se ha señalado que cuando una entidad promotora de salud no ha hecho uso de los diferentes mecanismos de cobro que se encuentran a su alcance para lograr el pago de los aportes atrasados, se allana a la mora y, por ende, no puede fundamentar el no reconocimiento de una incapacidad laboral en la falta de pago o en la cancelación extemporánea de las cotizaciones. Esta decisión será reiterada en el presente proceso dentro del expediente T-1308199.

2.1.6. ¿Desconoce el derecho a la salud de una persona, una entidad encargada de garantizar la prestación de los servicios de salud, al interrumpir el suministro de los mismos porque ya transcurrió un mes luego del momento en que la persona dejó de cotizar, en razón a que ahora es desempleado? De acuerdo con la jurisprudencia constitucional, *el acceso a un servicio de salud debe ser continuo, no puede ser interrumpido súbitamente*; viola el derecho a la salud una EPS que suspenda el suministro de un tratamiento médico que se requiera, *antes de que éste haya sido efectivamente asumido por otro prestador* (*ver apartado 4.4.6.4.*). En especial, si se trata de un sujeto de especial protección en salud, por padecer una enfermedad catastrófica o de alto costo, caso en el cual, adicionalmente, no pueden cobrársele copagos (*ver sección 4.5.*). Esta jurisprudencia será reiterada en el proceso del expediente T-1315769.

2.1.7. ¿Desconoce el derecho a la salud una entidad que se niega a afiliar a una persona, a pesar de haberse cumplido el tiempo necesario para poder trasladarse, por el hecho de que dentro de su grupo familiar existe una persona (su hijo, un niño) que padece una enfermedad catastrófica y, por tanto, debería esperar más tiempo para poder trasladarse? La Sala, teniendo en cuenta la regulación y la jurisprudencia constitucional pertinentes, considera que la respuesta a ésta cuestión es afirmativa, en razón a que la entidad acusada está desconociendo una libertad asociada al derecho a la salud a una persona, con base en una norma de la regulación que no es aplicable (*ver apartados 4.2.6. y*

5.7.). Esta decisión es adoptada en el proceso del expediente T-1350500.

2.1.8. ¿Viola un órgano del Estado el derecho de petición de una entidad encargada de garantizar la prestación de los servicios de salud así como el derecho a la salud de los afiliados y beneficiarios del sistema de protección, al negarse a responder de fondo una petición para remover un obstáculo en uno de los trámites necesarios para asegurar el adecuado flujo de los recursos y, por tanto, sostener las condiciones indispensables para garantizar el goce efectivo del derecho a la salud en razón a que el órgano estatal respectivo se considera incompetente? Fundándose en la jurisprudencia constitucional sobre el derecho de petición, se responde afirmativamente a esta pregunta. Este problema jurídico se plantea en los expedientes T-1645295 y T-1646086.

2.1.9. ¿Vulnera el derecho a la salud la interpretación restrictiva del POS, según la cual se entienden excluidos los insumos no mencionados expresamente en el POS, y procede en consecuencia su recobro ante el Fosyga cuando son ordenados por un juez de tutela? Con base en los criterios de interpretación elaborados por la Corte Constitucional para resolver las dudas acerca de la inclusión o no de un servicio médico en el POS, se responde afirmativamente la anterior pregunta. Este problema jurídico se plantea en los expedientes T-1855574, T-1858995, T-1858999, T-1859088, T-1862038, y T-1862046, T-1866944, T-1867317, T-1867326.

Estos casos revelan la existencia de problemas generales, graves y recurrentes en el sistema de protección del derecho a la salud.

## **2.2. Problemas jurídicos generales**

Los problemas jurídicos de carácter general, hacen referencia a cuestiones de orden constitucional que tienen que ver con la regulación del sistema de protección del derecho a la salud, que afectan la posibilidad de que éste sea gozado efectivamente por las personas en situaciones concretas y específicas, tal como se evidencia en los casos acumulados en el presente proceso. Todos los problemas generales se pueden reunir en uno sólo, a saber: ¿Las fallas de regulación constatadas en la presente sentencia a partir de los casos acumulados y de las pruebas practicadas por esta Sala, representan una violación de las obligaciones constitucionales que tienen las autoridades competentes de *respetar*, *proteger* y *garantizar* el derecho a la salud para asegurar su goce efectivo? A esta pregunta se responde afirmativamente y se imparten las órdenes necesarias para que se superen las fallas de regulación detectadas. Las órdenes que se impartirán se enmarcan dentro del sistema concebido por la Constitución y desarrollado por la Ley 100 de 1993 y normas posteriores, puesto que excedería la competencia de la Corte ordenar el diseño de un sistema distinto, puesto que dicha decisión compete al legislador. Las órdenes se impartirán a los órganos legalmente competentes para adoptar las determinaciones que podrían superar las fallas de la regulación que se han traducido en una desprotección del derecho a la salud evidente en las acciones de tutela que se han presentado cada vez con mayor frecuencia desde hace

varios años, como se analizará posteriormente (*ver capítulo 6*). Concretamente, la Sala identificó en los expedientes acumulados los siguientes problemas generales:

2.2.1. ¿Desconoce el Estado el derecho a la salud de las personas al permitir que se mantenga la incertidumbre en relación con los servicios incluidos, los no incluidos y los excluidos del plan obligatorio de salud, teniendo en cuenta las controversias que esta incertidumbre produce y su impacto negativo en el acceso oportuno a los servicios de salud? En virtud de lo que ha dicho la jurisprudencia constitucional con relación al derecho a la salud, se concluye que el Estado *desprotege* el derecho a la salud de las personas al mantener las incertidumbres en torno a la cobertura asegurada por el plan obligatorio de salud, pues así impone cargas elevadas y barreras al acceso a los servicios de salud, en razón a los debates y discusiones administrativas y judiciales previas que generan desgastes considerables e innecesarios de recursos de casi todos los actores del sector; además, tales incertidumbres impiden adoptar las medidas adecuadas y necesarias para asegurar la financiación de los servicios de salud de tal forma que todos los colombianos pueden acceder de manera oportuna y efectiva a servicios de salud de buena calidad (*ver apartado 6.1.1.1*). En consecuencia, se ordenará a la Comisión Nacional de Regulación en Salud la revisión integral de los Planes Obligatorios de Salud (POS), garantizando la participación directa y efectiva de la comunidad médica y de los usuarios del sistema de salud. Como una medida complementaria, se ordenará a la Comisión de Regulación en Salud la revisión de los Planes Obligatorios de Salud por lo menos una vez al año, con base en los criterios establecidos en la ley (de acuerdo con los cambios en la estructura demográfica de la población, el perfil epidemiológico nacional, la tecnología apropiada disponible en el país y las condiciones financieras del sistema – artículo 162, parágrafo 2, Ley 100 de 1993). La Comisión presentará un informe anual a la Defensoría del Pueblo y a la Procuraduría General de la Nación indicando, durante el respectivo período, (i) qué se incluyó, (ii) qué no se incluyó de lo solicitado por la comunidad médica y los usuarios, (iii) qué servicios pasan a ser suprimidos de los planes de beneficios, indicando las razones específicas por las cuales se toma dicha decisión, (iv) la justificación de la decisión en cada caso, con las razones médicas y de sostenibilidad financiera. En el evento de que la Comisión de Regulación en Salud no se encuentre integrada, el cumplimiento de estas órdenes corresponderá al Consejo Nacional de Seguridad Social en Salud (*ver apartado 6.1.1.2*).

2.2.2. ¿Desconoce el Estado el derecho a la salud de las personas, al permitir que la mayoría de las decisiones judiciales que tutelan el acceso a los servicios de salud, tengan que ocuparse de garantizar el acceso a servicios contemplados en los planes obligatorios de salud, ya financiados? Aunque la Corte reconoce los esfuerzos realizados por el Estado en esta materia, considera que deja de *proteger* el derecho a la salud cuando permite que la mayoría de violaciones a éste se presenten en situaciones recurrentes en las cuales se obstaculiza a las personas el acceso a servicios contemplados en los planes obligatorios de salud, es decir, servicios ya financiados por estar incluidos dentro del POS (*ver apartado 6.1.4.1*). Por esta razón, en la parte

resolutiva de esta providencia se ordenará al Ministerio de la Protección Social que adopte medidas para garantizar que todas las Entidades Promotoras de Salud envíen a la Comisión de Regulación en Salud, a la Superintendencia Nacional de Salud y a la Defensoría del Pueblo, un informe trimestral en el que se indique: (i) los servicios de salud ordenados por el médico tratante a sus usuarios que sean negados por la Entidad Promotora de Salud sin ser tramitados por el Comité Técnico Científico, (ii) los servicios médicos ordenados por el médico tratante a sus usuarios que sean negados por el Comité Técnico Científico de cada entidad; (iii) indicando en cada caso las razones de la negativa. El primer informe deberá ser enviado en la fecha señalada en la parte resolutiva de esta providencia y copia del mismo deberá ser remitido a la Corte Constitucional antes de la misma fecha (*ver apartado 6.1.4.2.*). También se ordenará al Ministerio de la Protección Social y a la Superintendencia Nacional de Salud que adopten las medidas para identificar las Entidades Promotoras de Salud y las Instituciones Prestadoras de Servicios que con mayor frecuencia se niegan a autorizar oportunamente servicios de salud incluidos en el POS [o que se *requieran con necesidad*].

2.2.3. ¿Desconoce el Estado el derecho a la salud de las personas que son beneficiarias del régimen subsidiado, por no haber tomado las medidas para garantizar que puedan acceder a un plan de servicios de salud que no difiera de los contenidos contemplados en el plan obligatorio de salud para el régimen contributivo? ¿Habida cuenta de que el derecho a la salud impone al Estado el deber de avanzar progresivamente hacia la ampliación de los servicios asegurados, la menor cobertura para los niños y niñas del régimen subsidiado puede prolongarse indefinidamente al igual que las diferencias de cobertura respecto de los adultos? La Corte estima que después de 15 años de haber sido expedida la Ley 100 de 1993, es constitucionalmente inadmisibles que no se haya previsto superar la desigualdad entre el plan subsidiado y el contributivo y que esta diferencia es más gravosa para los menores de edad. El Estado ha desconocido el derecho a la salud de las personas beneficiarias del régimen subsidiado, por cuanto no existen actualmente programas ni cronogramas que muestren un esfuerzo para avanzar en ese sentido. En consecuencia, se ordenará a la Comisión de Regulación en Salud unificar los planes de beneficios para los niños y las niñas del régimen contributivo y del subsidiado, teniendo en cuenta los ajustes necesarios a la UPC subsidiada de los niños y las niñas para garantizar la financiación de la ampliación en la cobertura. En caso de que para esa fecha no se hayan adoptado las medidas necesarias para la unificación del plan de beneficios de los niños y las niñas, se entenderá que el plan obligatorio de salud del régimen contributivo cubre a los niños y las niñas del régimen contributivo y del régimen subsidiado (*ver apartado 6.1.2.1.*). También se ordenará a la Comisión de Regulación en Salud que adopte un programa y un cronograma para la unificación gradual y sostenible de los planes de beneficios del régimen contributivo y del régimen subsidiado teniendo en cuenta: (i) las prioridades de la población según estudios epidemiológicos, (ii) la sostenibilidad financiera de la ampliación de la cobertura y su financiación por la UPC y las demás fuentes de financiación previstas por el sistema vigente (*ver apartado 6.1.2.2.*). Dicho cronograma deberá contemplar la unificación para la fecha en la que indique el mismo

regulador, salvo razones imperiosas e insuperables específica y cuidadosamente sustentadas. Periódicamente deberá presentar un informe a la Defensoría del Pueblo con la periodicidad que allí mismo se señale que deberá incluir: (i) un programa; (ii) un cronograma; (iii) metas medibles; (iv) mecanismos para el seguimiento del avance y (v) la justificación de por qué se presentaron regresiones o estancamientos en la ampliación progresiva de la protección del derecho a la salud.

2.2.4. ¿Desconoce el Estado el derecho a la salud de las personas que requieren con necesidad un servicio de salud, diferente a medicamentos, al no haber fijado y regulado un procedimiento mediante el cual la entidad encargada de garantizar la prestación del servicio garantice el acceso efectivo al mismo? Para la Sala, la ausencia de regulación clara que permita hacer efectivos los derechos de los usuarios cuando requieren un servicio de salud, diferente a un medicamento, no incluido en el POS, es una de las razones por las cuales la tutela se ha convertido en el mecanismo generalizado para acceder a servicios de salud no incluidos en el POS ordenados por el médico tratante, e incluso muchas veces a medicamentos cuando el médico tratante no presenta la solicitud ante el Comité Técnico Científico. Esta omisión del regulador representa una gran barrera al acceso a los servicios de salud que requieren las personas, lo cual constituye un claro déficit de protección del derecho fundamental a la salud (*ver apartado 6.1.3.1.*).

En consecuencia, se ordenará a la Comisión de Regulación en Salud que adopte las medidas necesarias para regular el trámite interno que debe adelantar el médico tratante para que la EPS autorice directamente (a) los servicios de salud no incluidos en el plan obligatorio de salud (contributivo o subsidiado), diferentes al suministro de un medicamento y (b) como los medicamentos y demás insumos para la atención de las actividades, procedimientos e intervenciones explícitamente excluidas del Plan Obligatorio de Salud, de tal forma que se respete el principio de integralidad. No obstante, hasta tanto éste trámite interno de las EPS no sea regulado de manera definitiva, se ordenará que se adopten las medidas necesarias para garantizar que las entidades promotoras de salud, EPS, apliquen las reglas vigentes para someter a consideración del Comité Técnico Científico de la entidad la aprobación de medicamentos u otros servicios médicos no incluido en el POS, teniendo en cuenta los parámetros fijados por la Corte Constitucional, en especial lo decidido en la sentencia C-463 de 2008 (*ver apartado 6.1.3.2.*). El Ministerio de la Protección Social deberá presentar un informe sobre el cumplimiento de esta orden a la Superintendencia Nacional de Salud y a la Defensoría del Pueblo, con copia a la Corte Constitucional.

2.2.5. Adicionalmente, se impartirán órdenes relacionadas con otros problemas generales que han llevado a la presentación de acciones de tutela y son causas de las fallas en el sistema de protección del derecho a la salud.

2.2.5.1. Cuando una persona requiere un servicio de salud que no se encuentra incluido dentro del Plan Obligatorio de Servicios, y carece de recursos para

cubrir el costo del mismo que le corresponda asumir, las entidades encargadas de asegurar la prestación del servicio (EPS) deben cumplir con su responsabilidad y, en consecuencia, asegurar el acceso a éste. No obstante, es el Estado quien ha de asumir el costo del servicio, por cuanto le corresponde la obligación de garantizar el goce efectivo del derecho. En tal sentido, la jurisprudencia constitucional y la regulación han reconocido a la entidad aseguradora el derecho de repetir contra el Estado (*ver secciones 4.4. y 6.2.*), a través del Fosyga. El adecuado financiamiento de los servicios de salud no contemplados en el POS depende entonces, del correcto flujo de recursos por parte del Estado para cubrir el pago de los recobros que reglamentariamente sean presentados por las entidades que garantizan la prestación del servicio. En la medida en que tales costos no están presupuestados por el Sistema dentro del monto que recibe la entidad aseguradora de la prestación del servicio de salud por cuenta de cada uno de sus afiliados o beneficiarios (UPC, unidad de pago por capitación), su falta de pago atenta contra la sostenibilidad del sistema, y en tal medida, al acceso a la prestación de los servicios de salud que se requieran con necesidad. Al ser las entidades encargadas de garantizar la prestación del servicio (EPS), o incluso las instituciones prestadoras de salud (IPS), las que suelen asumir los costos de la demora de los pagos de los recobros, se genera además, una presión sobre éstas para dejar de autorizar la prestación de servicios de servicios no contemplados en el POS. Así pues, en la medida que la capacidad del Sistema de Salud para garantizar el acceso a un servicio de salud depende de la posibilidad de financiarlo sin afectar la sostenibilidad del Sistema, el que no exista un flujo de recursos adecuado para garantizar el acceso a los servicios de salud que se requieran con necesidad, no incluidos dentro de los planes de servicio, obstaculiza el acceso a dichos servicios. Con relación al cumplimiento oportuno de los fallos de tutela y al derecho al recobro de servicios médicos no cubiertos por el plan de beneficios ante el Fosyga, se plantean, a su vez, tres conjuntos de órdenes.

En primer lugar, órdenes para no supeditar a la decisión sobre eventual revisión por parte de la Corte la fecha de ejecutoria de la sentencia que amparó el derecho a la salud. En este caso se ordenará al Ministerio de la Protección Social y al administrador fiduciario del Fosyga que adopten medidas para garantizar que el procedimiento de recobro por parte de las Entidades Promotoras de Salud ante el Fosyga sea ágil con miras a asegurar el flujo de recursos necesario para proteger efectivamente el derecho en el sistema. Dentro de estas medidas por lo menos se tendrán en cuenta las siguientes, cuando se trate de servicios de salud cuya práctica se autorizó en cumplimiento de una acción de tutela: (i) la entidad promotora de salud deberá cumplir inmediatamente la orden de protección del derecho a la salud y podrá iniciar el proceso de recobro una vez el fallo se encuentre en firme, bien sea porque la sentencia de instancia no fue impugnada, bien sea porque se trata de la sentencia de segunda instancia, sin que la autorización del servicio de salud y el procedimiento de recobro pueda ser obstaculizado con base en el pretexto del proceso de revisión que se surte ante la Corte Constitucional; (ii) no se podrá establecer que en la parte resolutive del fallo de tutela se debe autorizar el recobro ante el Fosyga como condición para autorizar el servicio médico no cubierto por el POS ni para reconocer el derecho al recobro de los costos que

la entidad no estaba legal ni reglamentariamente obligada a asumir. La EPS debe acatar oportunamente la orden de autorizar el servicio de salud no cubierto por el POS y bastará con que en efecto el administrador del Fosyga constate que la entidad no se encuentra legal ni reglamentariamente obligada a asumirlo de acuerdo con el ámbito del correspondiente plan de beneficios financiado por la UPC; (iii) en el reembolso se tendrá en cuenta la diferencia entre medicamentos de denominación genérica y medicamentos de denominación de marca, sin que pueda negarse el reembolso con base en la glosa '*Principio activo en POS*' cuando el medicamento de marca sea formulado bajo las condiciones señaladas en el apartado 6.2.1 de esta providencia.

En segundo lugar, órdenes encaminadas a que se adopte un Plan de Contingencia que permita el pago de los recobros atrasados para asegurar el flujo de recursos en las EPS como una medida para garantizar la prestación de los servicios de salud a los usuarios de manera oportuna y el goce efectivo de su derecho a la salud. En este sentido se ordenará al Ministerio de la Protección Social y a Fidufosyga 2005, que si aún no lo han hecho, diseñen un Plan de Contingencia para (i) adelantar el trámite de las solicitudes de recobro que están en mora y (ii) efectuar los pagos de las solicitudes de recobro en las que se verificó el cumplimiento de los requisitos de las resoluciones vigentes que están en mora. Este plan deberá señalar: (i) metas específicas para el cumplimiento de la presente orden, (ii) un cronograma para el cumplimiento de las órdenes y (iii) las acciones que se llevarán a cabo para el cumplimiento de las metas, individualizando en cada caso el responsable de su cumplimiento. El Plan deberá ser presentado antes de la fecha indicada en la parte resolutive de esta providencia ante el Comité de Verificación creado por el Consejo de Estado y ante la Corte Constitucional y deberá ser ejecutado en su totalidad antes de la fecha indicada en la parte resolutive de esta providencia. En caso de que no se efectúe el reembolso oportunamente de a lo menos el 50% de las solicitudes de recobro, operará un mecanismo de compensación general para dicho 50%. El resto del monto (50%) deberá haber sido cancelado en su totalidad antes de la fecha indicada en la parte resolutive de esta providencia. En caso de que posteriormente se verifique que el Fosyga no estaba obligado a realizar determinado reembolso, se deberán adoptar las medidas para compensar esos recursos a cargo de la respectiva EPS. Sobre el cumplimiento del Plan de Contingencia el Ministerio de Protección Social y el administrador del Fosyga, presentarán un informe cada dos meses al Comité mencionado de Verificación mencionado.

En tercer lugar, órdenes para corregir las fallas en el sistema de financiación de servicios médicos que se requieran con necesidad y no estén cubiertos por el POS. Con esta medida se busca estabilizar el flujo de recursos hacia el cubrimiento de los servicios de salud con miras a garantizar la satisfacción del derecho a la salud de los usuarios y la asignación oportuna de recursos para la atención eficiente de las necesidades y prioridades de la salud. Se ordenará al Ministerio de Protección Social que tome las medidas necesarias para que el sistema de verificación, control y pago de las solicitudes de recobro funcione de manera eficiente, y que el Fosyga desembolse prontamente los dineros

concernientes a las solicitudes de recobro. El Ministerio de Protección Social podrá definir el tipo de medidas necesarias. Éstas podrán consistir, por ejemplo, en cambios de tipo gerencial, tales como la contratación de personal que ayude a evacuar las solicitudes de acuerdo al sistema actual, o en el rediseño del sistema de recobro.

2.2.5.2. Con relación a la información en salud, en especial sobre cuáles son los derechos de los pacientes y cuáles son los resultados obtenidos por las distintas entidades del sector, la Sala ordenará al Ministerio de la Protección Social que si aún no lo ha hecho, dentro de los seis meses siguientes, adopte las medidas necesarias para asegurar que al momento de afiliarse a una EPS, contributiva o subsidiada, le entreguen a toda persona, en términos sencillos y comprensibles, la siguiente información: (i) *Una carta con los derechos del paciente*. Esta deberá contener, por lo menos, los derechos contemplados en la Declaración de Lisboa de la Asociación Médica Mundial (adoptada por la 34<sup>a</sup> Asamblea en 1981) y los contemplados en la parte motiva de esta providencia, en especial, en los *capítulos 4 y 8*. Esta *Carta* deberá estar acompañada de las indicaciones acerca de cuáles son las instituciones que prestan ayuda para exigir el cumplimiento de los derechos y cuáles los recursos mediante los cuales se puede solicitar y acceder a dicha ayuda. (ii) *Una carta de desempeño*. Este documento deberá contener información básica acerca del desempeño y calidad de las diferentes EPS a las que se puede afiliarse en el respectivo régimen, así como también acerca de las IPS indicando cuáles trabajan con cuáles. El documento deberá contemplar la información necesaria para poder ejercer adecuadamente su libertad de escogencia y acceder oportuna y efectivamente a los servicios de salud. Este documento deberá ser elaborado por el Ministerio de la Protección Social, ponderando entre, de una parte, la accesibilidad del mencionado documento a personas que no cuentan con conocimientos técnicos acerca del sistema de salud, y de otra, la presentación de una información que refleje de manera suficiente la realidad del desempeño de las EPS e IPS. Además se ordenará al Ministerio de la Protección Social y a la Comisión de Regulación en Salud que adopten las medidas adecuadas y necesarias para proteger a las personas a quienes se les irrespete el derecho de acceder a la información adecuada y suficiente que les permita ejercer su libertad de elección de la entidad encargada de garantizarles el acceso a los servicios de salud. Dentro de las reglas que se establezcan para el efecto, podrá contemplarse que en aquellos casos en los cuales la información no sea suministrada previamente a éstas, no tendrán limitación de tiempo para poder ejercer su libertad de cambiarse de entidad promotora de salud.

2.2.5.3. Por último, con relación a la cobertura universal, la Sala reconoce que el gobierno, con base en la decisión del Consejo de Estado proferida el 16 de mayo de 2007 y el mandato del Congreso de la República, es el que ha definido las políticas públicas orientadas a cumplir la meta de la cobertura universal en salud. Por esta razón, en la parte resolutive de esta sentencia se ordenará al Ministerio de Protección Social que adopte las medidas necesarias para asegurar la cobertura universal sostenible del Sistema General de Seguridad Social en Salud en la fecha fijada por el legislador (enero, 2010).

En caso de que alcanzar esta meta sea imposible, deberá explicarse las razones del incumplimiento y fijarse una nueva meta, debidamente justificada.

### **2.3. Estructura de la decisión**

Para analizar y resolver los problemas jurídicos planteados, la presente sentencia los aborda de la siguiente forma. Primero, se señala que el derecho a la salud es un derecho fundamental, así sea considerado usualmente por la doctrina como un derecho social y, además, tenga una importante dimensión prestacional. Segundo, se analizan las características de este derecho fundamental y las reglas pertinentes que ha trazado la jurisprudencia para asegurar un ámbito específico de protección, a saber, el acceso a los servicios de salud. Dichas reglas son luego aplicadas a los casos concretos. Tercero, se derivan las implicaciones que tiene la fundamentalidad del derecho a la salud frente a las fallas de regulación constatadas por la Corte y se imparten las órdenes correspondientes para que las autoridades competentes adopten las medidas necesarias para superar el déficit de protección.

## **3. El derecho a la salud como derecho fundamental**

El derecho a la salud es un derecho constitucional fundamental. La Corte lo ha protegido por tres vías. La primera ha sido estableciendo su relación de conexidad con el derecho a la vida, el derecho a la integridad personal y el derecho a la dignidad humana, lo cual le ha permitido a la Corte identificar aspectos del núcleo esencial del derecho a la salud y admitir su *tutelabilidad*; la segunda ha sido reconociendo su naturaleza fundamental en contextos donde el tutelante es un sujeto de especial protección, lo cual ha llevado a la Corte a asegurar que un cierto ámbito de servicios de salud requeridos sea efectivamente garantizado; la tercera, es afirmando en general la fundamentalidad del derecho a la salud en lo que respecta a un ámbito básico, el cual coincide con los servicios contemplados por la Constitución, el bloque de constitucionalidad, la ley y los planes obligatorios de salud, con las extensiones necesarias para proteger una vida digna. A continuación, pasa la Corte a delimitar y caracterizar el derecho a la salud, en los términos en que ha sido consignado por la Constitución, el bloque de constitucionalidad, la Ley y la jurisprudencia.

### **3.1. Noción de salud**

La jurisprudencia constitucional, desde su inicio, ha reconocido que la salud “(...) es un estado variable, susceptible de afectaciones múltiples, que inciden en mayor o menor medida en la vida del individuo.” La ‘salud’, por tanto, no es una condición de la persona que se tiene o no se tiene. Se trata de una cuestión de grado, que ha de ser valorada específicamente en cada caso. Así pues, la salud no sólo consiste en la ‘ausencia de afecciones y enfermedades’ en una persona. Siguiendo a la OMS, la jurisprudencia constitucional ha señalado que la salud es ‘un estado completo de bienestar físico, mental y social’ dentro del nivel posible de salud para una persona. En términos del

bloque de constitucionalidad, el derecho a la salud comprende el derecho al *nivel más alto de salud posible* dentro de cada Estado, el cual se alcanza de manera progresiva. No obstante, la jurisprudencia también ha reconocido que la noción de salud no es unívoca y absoluta. En estado social y democrático de derecho que se reconoce a sí mismo como pluriétnico y multicultural, la noción constitucional de salud es sensible a las diferencias tanto sociales como ambientales que existan entre los diferentes grupos de personas que viven en Colombia.

### **3.2. El derecho fundamental a la salud**

3.2.1. La Corte Constitucional ha reconocido el carácter fundamental del derecho a la salud. En la presente sentencia, la Sala de Revisión no entra a analizar el concepto de '*derecho fundamental*'. Esta categoría es objeto de sinnúmero de debates doctrinarios y judiciales que no se pretenden zanjar en el presente proceso. Por ello, no entra a definir qué es un derecho fundamental, en general, ni cuáles son los criterios para su identificación o delimitación, entre otras cuestiones. No obstante, la jurisprudencia constitucional ha ido delimitando algunos aspectos del concepto, que serán retomados a continuación. En un primer momento, la Corte delimitó el concepto de forma negativa, indicando cómo no debe ser entendido. Posteriormente, aportó un elemento definitorio de carácter positivo. Sin embargo, se reitera, esta caracterización mínima del concepto de derecho fundamental no pretende definir la cuestión en términos generales. Estos elementos se retoman, en cuanto han permitido caracterizar el derecho a la salud como fundamental.

3.2.1.1. Como lo ha señalado la propia Corte Constitucional, su postura respecto a qué es un derecho fundamental "(...) ha oscilado entre la idea de que se trata de derechos subjetivos de aplicación inmediata y la esencialidad e inalienabilidad del derecho para la persona." Aunque la Corte ha coincidido en señalar que el carácter fundamental de un derecho no se debe a que el texto constitucional lo diga expresamente, o a que ubique el artículo correspondiente dentro de un determinado capítulo, no existe en su jurisprudencia un consenso respecto a qué se ha de entender por derecho fundamental. Esta diversidad de posturas, sin embargo, sí sirvió para evitar una lectura textualista y restrictiva de la carta de derechos, contraria a la concepción generosa y expansiva que la propia Constitución Política demanda en su artículo 94, al establecer que no todos los derechos están consagrados expresamente en el texto, pues no pueden negarse como derechos aquellos que '*siendo inherentes a la persona humana*', no estén enunciados en la Carta.

3.2.1.2. La Corte Constitucional ha reiterado que uno de los elementos centrales que le da sentido al uso de la expresión 'derechos fundamentales' es el concepto de '*dignidad humana*', el cual ha de ser apreciado en el contexto en que se encuentra cada persona, como lo dijo el artículo 2 del Decreto 2591 de 1991. Al respecto dijo la Corte en la sentencia T-227 de 2003,

*“En sentencia T-801 de 1998, la Corte indicó que “es la realidad de cada caso concreto, las circunstancias únicas y particulares que lo caracterizan, las que permiten definir si se encuentra verdaderamente vulnerado un derecho fundamental, si ello afecta la dignidad de la parte actora y si esta última está en situación de indefensión frente al presunto agresor”. De esta sentencia surge un elemento que resulta decisivo para sistematizar el concepto de derecho fundamental: dignidad humana.”*

Este concepto, ha señalado la Corte, guarda relación con la *“libertad de elección de un plan de vida concreto en el marco de las condiciones sociales en las que el individuo se desarrolle”* y con *“la posibilidad real y efectiva de gozar de ciertos bienes y de ciertos servicios que le permiten a todo ser humano funcionar en la sociedad según sus especiales condiciones y calidades, bajo la lógica de la inclusión y de la posibilidad de desarrollar un papel activo en la sociedad”*. Por tanto, a propósito de la relación entre derecho fundamental y dignidad humana, la jurisprudencia, en la sentencia T-227 de 2003, concluyó lo siguiente,

*“(…) el concepto de dignidad humana que ha recogido la Corte Constitucional únicamente se explica dentro del sistema axiológico de la Constitución y en función del mismo sistema. Así las cosas, la elevación a rango constitucional de la “libertad de elección de un plan de vida concreto en el marco de las condiciones sociales en las que el individuo se desarrolle” y de “la posibilidad real y efectiva de gozar de ciertos bienes y de ciertos servicios que le permiten a todo ser humano funcionar en la sociedad según sus especiales condiciones y calidades, bajo la lógica de la inclusión y de la posibilidad de desarrollar un papel activo en la sociedad”, definen los contornos de lo que se considera esencial, inherente y, por lo mismo inalienable para la persona, razón por la cual se traduce en derechos subjetivos (entendidos como expectativas positivas (prestaciones) o negativas) cuyos contenidos esenciales están sustraídos de las mayorías transitorias.*

*En este orden de ideas, será fundamental todo derecho constitucional que funcionalmente esté dirigido a lograr la dignidad humana y sea traducible en un derecho subjetivo. (...)”*

En tal sentido, el ámbito del derecho fundamental a la salud está delimitado por la dogmática constitucional, que reconoce los contenidos garantizados a las personas en virtud del mismo. El ámbito de protección, por tanto, no está delimitado por el plan obligatorio de salud. Puede existir un servicio de salud no incluido en el plan, que se requiera con necesidad y comprometa en forma grave la vida dignidad de la persona o su integridad personal.

3.2.1.3. Así pues, considerando que “son fundamentales (i) aquellos derechos respecto de los cuales existe consenso sobre su naturaleza fundamental y (ii)

*todo derecho constitucional que funcionalmente esté dirigido a lograr la dignidad humana y sea traducible en un derecho subjetivo*”, la Corte señaló en la sentencia T-859 de 2003 que el derecho a la salud es un derecho fundamental, ‘de manera autónoma’, cuando se puede concretar en una garantía subjetiva derivada de las normas que rigen el derecho a la salud, advirtiendo que algunas de estas se encuentran en la Constitución misma, otras en el bloque de constitucionalidad y la mayoría, finalmente, en las leyes y demás normas que crean y estructuran el Sistema Nacional de Salud, y definen los servicios específicos a los que las personas tienen derecho. Concretamente, la jurisprudencia constitucional ha señalado que el acceso a un servicio de salud que se requiera, contemplado en los planes obligatorios, es derecho fundamental autónomo. En tal medida, la negación de los servicios de salud contemplados en el POS es una violación del derecho fundamental a la salud, por tanto, se trata de una prestación claramente exigible y justiciable mediante acción de tutela. La jurisprudencia ha señalado que la calidad de fundamental de un derecho no depende de la vía procesal mediante la cual éste se hace efectivo.

El legislador también se ha pronunciado al respecto, al expedir la ley para ‘mejorar la atención’ de las personas que sufren enfermedades ruinosas o catastróficas, en la cual se advierte que el contenido de la ley, y de las disposiciones que las complementen o adicionen, *‘se interpretarán y ejecutarán teniendo presente el respeto y garantías al derecho a la vida y que en ningún caso se pueda afectar la dignidad de la persona.’* (art. 2, Ley 972 de 2005).

3.2.1.4. Siguiendo esta línea jurisprudencial, entre otras consideraciones, la Corte Constitucional en pleno ha subrayado que la salud es un derecho fundamental que debe ser garantizado a todos los seres humanos igualmente dignos. No hacerlo conduce a que se presenta un déficit de protección constitucionalmente inadmisibles. Por ejemplo, la Corte decidió que representaba una violación al derecho a la dignidad humana excluir del régimen de salud a la pareja de una persona homosexual, extendiendo así el alcance de la primera sentencia de constitucionalidad relativa al déficit de protección en que se encuentran las parejas homosexuales. En este caso resolvió reiterar la decisión jurisprudencial de reconocer “(...) *que el derecho a la salud es, autónomamente, un derecho fundamental y que, en esa medida, la garantía de protección debe partir de las políticas estatales, de conformidad con la disponibilidad de los recursos destinados a su cobertura.*” Esta decisión se adoptó considerando la estrecha relación entre la salud y el concepto de la ‘dignidad humana’, “(...) *elemento fundante del estado social de derecho que impone a las autoridades y a los particulares el trato a la persona conforme con su humana condición.*”

3.2.1.5. El reconocimiento de la salud como un derecho fundamental en el contexto constitucional colombiano, coincide con la evolución de su protección en el ámbito internacional. En efecto, la génesis y desenvolvimiento del derecho a la salud, tanto en el ámbito internacional

como en el ámbito regional, evidencia la fundamentalidad de esta garantía. En cuanto a la Observación General N° 14, referida específicamente al derecho a la salud, se hará referencia posteriormente a ella en el presente capítulo de esta sentencia (*ver apartado 3.4.2.*).

3.2.1.6. Finalmente, se insiste en que en la presente sentencia la Sala de Revisión no entra a establecer en detalle el alcance y contenido del concepto de derecho fundamental, en general, ni con relación al caso concreto de la salud. Partirá de la decisión de varias Salas de Revisión de la Corte Constitucional, así como de la Sala Plena, de reconocer el derecho a la Salud como un derecho fundamental. En esta sentencia la Sala se detendrá en las implicaciones que se derivan de reconocer la fundamentalidad del derecho a la salud, en especial en lo que respecta a las fallas en la regulación de su sistema de protección.

3.2.2. Ahora bien, uno de los aspectos en los que la jurisprudencia constitucional ha avanzado, es en el de señalar que reconocer la fundamentalidad de un derecho no implica, necesariamente, que todos los aspectos cobijados por éste son tutelables. Primero, porque los derechos constitucionales no son absolutos, es decir, puede ser limitados de conformidad con los criterios de razonabilidad y proporcionalidad que ha fijado la jurisprudencia constitucional. Segundo, porque la posibilidad de exigir el cumplimiento de las obligaciones derivadas de un derecho fundamental y la procedencia de hacerlo por medio de la acción de tutela, son cuestiones diferentes y separables.

La jurisprudencia constitucional señaló tempranamente que la acción de tutela es el medio judicial idóneo para defender el derecho a la salud. Recientemente, el legislador concedió facultades jurisdiccionales a la Superintendencia Nacional de Salud para resolver algunos de los conflictos suscitados con ocasión de la prestación de los servicios de salud (Ley 1122, art. 41). Esta decisión legislativa ha sido revisada hasta el momento en dos ocasiones por la Corte Constitucional. En la primera ocasión se resolvió declarar constitucional la norma por lo cargos estudiados en la demanda, “*en el entendido de que ningún funcionario de la Superintendencia Nacional de Salud podrá ejercer funciones jurisdiccionales respecto de casos en los cuales se hubiera pronunciado con anterioridad, en razón de sus funciones administrativas ordinarias de inspección, vigilancia y control.*” En la segunda ocasión, también se declaró constitucional la norma por los cargos analizados en la sentencia, pues se consideró que adjudicar funciones judiciales a la Superintendencia Nacional de Salud no implica, en modo alguno, que la acción de tutela deje de ser un medio judicial idóneo para reclamar la protección del derecho a la salud. La Corte también advirtió que los funcionarios de la Superintendencia, en el ejercicio de sus funciones judiciales, están obligados a usar la excepción de inconstitucionalidad, al igual que cualquier otro juez de la República, por lo que no pueden dejar de aplicar la Constitución o de garantizar el goce efectivo de un derecho constitucional fundamental a una persona, so pretexto de aplicar de manera preferente

normas regulatorias contrarias a la Constitución, de rango inferior, bien sean legislativas o administrativas (decretos, resoluciones, acuerdos, etc.).

3.2.3. El derecho a la salud es un derecho que protege múltiples ámbitos de la vida humana, desde diferentes perspectivas. Es un derecho complejo, tanto por su concepción, como por la diversidad de obligaciones que de él se derivan y por la magnitud y variedad de acciones y omisiones que su cumplimiento demanda del Estado y de la sociedad en general. La complejidad de este derecho, implica que la plena garantía del goce efectivo del mismo, está supeditada en parte a los recursos materiales e institucionales disponibles. Recientemente la Corte se refirió a las limitaciones de carácter presupuestal que al respecto existen en el orden nacional: “[e]n un escenario como el colombiano caracterizado por la escasez de recursos, en virtud de la aplicación de los principios de equidad, de solidaridad, de subsidiariedad y de eficiencia, le corresponde al Estado y a los particulares que obran en su nombre, diseñar estrategias con el propósito de conferirle primacía a la garantía de efectividad de los derechos de las personas más necesitadas por cuanto ellas y ellos carecen, por lo general, de los medios indispensables para hacer viable la realización de sus propios proyectos de vida en condiciones de dignidad.”

3.2.4. En un primer momento, la Corte Constitucional consideró que la acción de tutela era una herramienta orientada a garantizar el goce efectivo de los derechos de libertad clásicos y otros como la vida. No obstante, también desde su inicio, la jurisprudencia entendió que algunas de las obligaciones derivadas del derecho a la salud, por más que tuvieran un carácter prestacional y en principio fuera progresivo su cumplimiento, eran tutelables directamente, en tanto eran obligaciones de las que dependían derechos como la vida o la integridad personal, por ejemplo. Esto ha sido denominado la tesis de la *conexidad*: la obligación que se deriva de un derecho constitucional es exigible por vía de tutela si esta se encuentra en *conexidad* con el goce efectivo de un derecho fundamental. La Corte Constitucional ha señalado pues, que hay órbitas de la protección del derecho a la salud que deben ser garantizadas por vía de tutela, por la grave afección que implicarían para la salud de la persona y para otros derechos, expresamente reconocidos por la Constitución como ‘derechos de aplicación inmediata’, tales como la vida o la igualdad.

Sin embargo, también desde su inicio, la jurisprudencia constitucional consideró que la salud no solamente tiene el carácter de fundamental en los casos en los que “se relaciona de manera directa y grave con el derecho a la vida”, “sino también en aquellas situaciones en las cuales se afecte de manera directa y grave el mínimo vital necesario para el desempeño físico y social en condiciones normales”. Siguiendo a la Organización Mundial de la Salud, por ejemplo, la Corte ha resaltado que el derecho a la salud también se encuentra respaldado en el ‘*principio de igualdad en una sociedad*’. Es decir, el grado de salud que puede ser reclamado por toda persona de forma inmediata al Estado, es la protección de ‘*un mínimo vital, por fuera del cual, el deterioro orgánico impide una vida normal.*’

3.2.5. La jurisprudencia constitucional reconoció a través de la figura de la ‘conexidad’, casos en que la indivisibilidad e interdependencia de los derechos son manifiestas, a tal punto, que el incumplimiento de una obligación derivada de un derecho que no sea considerado una libertad clásica (como la salud), implica, necesariamente, el incumplimiento de la obligación derivada de un derecho que sí es clasificado como esencial (como la vida).

Pero la utilidad práctica de tal argumentación, ha sido cuestionada por la propia jurisprudencia. De hecho, recientemente la Corte consideró ‘artificial’ tener que recurrir a la ‘estrategia de la conexidad’ para poder proteger el derecho constitucional invocado. Dijo al respecto,

*“Hoy se muestra artificial predicar la exigencia de conexidad respecto de derechos fundamentales los cuales tienen todos – unos más que otros - una connotación prestacional innegable. Ese requerimiento debe entenderse en otros términos, es decir, en tanto enlace estrecho entre un conjunto de circunstancias que se presentan en el caso concreto y la necesidad de acudir a la acción de tutela en cuanto vía para hacer efectivo el derecho fundamental. Así, a propósito del derecho fundamental a la salud puede decirse que respecto de las prestaciones excluidas de las categorías legales y reglamentarias únicamente podrá acudirse al amparo por vía de acción de tutela en aquellos eventos en los cuales logre demostrarse que la falta de reconocimiento del derecho fundamental a la salud (i) significa a un mismo tiempo lesionar de manera seria y directa la dignidad humana de la persona afectada con la vulneración del derecho; (ii) se pregona de un sujeto de especial protección constitucional y/o (iii) implica poner a la persona afectada en una condición de indefensión por su falta de capacidad de pago para hacer valer ese derecho.*

*Lo anterior; justamente por cuanto el Estado - bajo aplicación de los principios de equidad, solidaridad, subsidiariedad y eficiencia - ha de racionalizar la prestación satisfactoria del servicio de salud a su cargo o a cargo de los particulares que obran en calidad de autoridades públicas, atendiendo, de modo prioritario, a quienes se encuentren en cualquiera de las circunstancias mencionadas con antelación. Al respecto, la Corte Constitucional ha expresado mediante jurisprudencia reiterada que, bajo estas circunstancias, aún tratándose de prestaciones excluidas del POS, del POSS, del PAB, del PAC y de aquellas obligaciones previstas por la Observación General 14, procede la tutela como mecanismo para obtener el amparo del derecho constitucional fundamental a la salud.”*

Así pues, la jurisprudencia constitucional ha dejado de decir que tutela el derecho a la salud ‘en conexidad con el derecho a la vida y a la integridad

personal', para pasar a proteger el derecho 'fundamental autónomo a la salud'. Para la jurisprudencia constitucional "(...) *no brindar los medicamentos previstos en cualquiera de los planes obligatorios de salud, o no permitir la realización de las cirugías amparadas por el plan, constituye una vulneración al derecho fundamental a la salud.*" La Corte también había considerado explícitamente que el derecho a la salud es fundamental y tutelable, en aquellos casos en los que la persona que requiere el servicio de salud es un sujeto de especial protección constitucional. Así lo ha considerado la jurisprudencia, por ejemplo, con relación a las personas de la tercera edad.

Sin embargo, esta variante jurisprudencial deja de ser relevante en punto a la cuestión de la fundamentalidad del derecho a la salud.

### **3.3. Facetas positivas y negativas derivadas del derecho a la salud; jurisprudencia sobre la protección de los derechos fundamentales, a propósito de las obligaciones de contenido prestacional**

3.3.1. El derecho a la salud tiene una marcada dimensión positiva, aunque también tiene dimensiones negativas. La jurisprudencia constitucional ha reconocido desde un inicio, que el Estado, o las personas, pueden violar el derecho a la salud, bien sea por una omisión, al dejar de prestar un servicio de salud, o bien por una acción, cuando realizan una conducta cuyo resultado es deteriorar la salud de una persona. En lo que respecta a las dimensiones negativas del derecho a la salud, de las cuales no se deriva la obligación de realizar una acción positiva, sino más bien, obligaciones de abstención, en tanto no suponen que el Estado haga algo, sino que lo deje de hacer, no hay razón alguna para que sean obligaciones cuyo cumplimiento sea pospuesto hasta que el Estado entidad o persona cuente con los recursos suficientes y la capacidad administrativa adecuada.

3.3.2. La Corte no considera que las facetas positivas de un derecho siempre estén sometidas a una protección gradual y progresiva. '*Cuando la omisión en el cumplimiento de las obligaciones correlativas mínimas coloca al titular del derecho ante la inminencia de sufrir un daño injustificado*', éste puede reclamar la protección judicial inmediata del derecho. El criterio propuesto por la jurisprudencia para determinar cuándo se está ante tal situación es el de *urgencia*, el cual es expuesto en la sentencia T-595 de 2002 en los siguientes términos,

*"(...) La urgencia de la situación en la que se encuentra la persona activa la exigibilidad judicial del derecho respecto de la prestación cuyo cumplimiento es necesario para evitar un perjuicio irremediable. El criterio de la urgencia torna objetiva y judicialmente reconocible la necesidad de ejecutar de forma inmediata la prestación que, de otra forma, permanece dentro de la esfera decisoria del obligado (...)."*

3.3.3. Para la jurisprudencia constitucional, la clasificación de los derechos

fundamentales constitucionales agrupándolos por generaciones debe tener una relevancia académica, más no jurídica o conceptual. Según la Corte, “[l]a creencia de que los derechos de libertad no suponen gasto y que en cambio los derechos sociales, económicos y culturales sí, ha llevado a salvaguardar decididamente la protección inmediata de los primeros, mientras que la de los segundos no”. Desde su inicio, la jurisprudencia constitucional ha indicado que si bien el carácter prestacional de los derechos constitucionales está ‘estrechamente’ relacionado con los derechos económicos, sociales y culturales, no se trata de dos categorías idénticas, que coincidan.

3.3.4. No es cierto pues, que la categoría derechos de libertad coincida con la categoría ‘derechos no prestacionales’ o ‘derechos negativos’. Existen múltiples facetas de los derechos sociales, económicos y culturales, concretamente del derecho a la salud, que son de carácter negativo y su cumplimiento no supone la actuación del Estado o de los particulares sino su abstención.

3.3.5. La jurisprudencia constitucional considera entonces, que la condición de ‘prestacional’ no se predica de la categoría ‘derecho’, sino de la ‘faceta de un derecho’. Es un error categorial hablar de ‘derechos prestacionales’, pues, como se dijo, todo derecho tiene facetas prestacionales y facetas no prestacionales.

3.3.6. Algunas de las obligaciones que se derivan de un derecho fundamental y que tienen un carácter prestacional, son de cumplimiento *inmediato*, bien sea porque se trata de una acción simple del Estado, que no requiere mayores recursos (por ejemplo, la obligación de suministrar la información de cuáles son sus derechos a los pacientes, antes de ser sometidos a un tratamiento médico), o porque a pesar de la movilización de recursos que la labor implica, la gravedad y urgencia del asunto demandan una acción estatal inmediata (por ejemplo, la obligación de adoptar las medidas adecuadas y necesarias para garantizar la atención en salud de todo bebé durante su primer año de vida – art. 50, CP–). Otras de las obligaciones de carácter prestacional derivadas de un derecho fundamental son de cumplimiento *progresivo*, por la complejidad de las acciones y los recursos que se requieren para garantizar efectivamente el goce efectivo de estas facetas de protección de un derecho. Tanto la decisión democrática acerca del grado de protección que se brindará a un derecho fundamental en sus facetas prestacionales, como la adopción e implementación de las formas específicas de garantizar su efectivo respeto, protección y cumplimiento, suponen que el cumplimiento de este tipo de obligaciones se logre progresivamente. En tal sentido, el cumplimiento de este tipo de obligaciones no se satisface con la simple actuación estatal, ésta debe ser ajustada a la Constitución, por lo que debe estar encaminada a garantizar el goce efectivo de los derechos.

3.3.7. Ahora bien, la Corte no sólo reconoce que la defensa de muchas de las facetas prestacionales de un derecho constitucional requiere acciones variadas y complejas por parte del Estado. También reconoce que les compete a las

autoridades constitucionalmente establecidas para tal labor, decidir cuáles son las acciones y medidas necesarias para que se garantice el derecho del accionante. Garantizar el goce efectivo de los derechos fundamentales, sean estos de libertad o sociales, es un mandato constitucional que irradia el ejercicio del poder público y determina una de sus funciones principales en un Estado Social de Derecho.

3.3.8. La progresividad justifica la imposibilidad de exigir judicialmente en casos individuales y concretos, el inmediato cumplimiento de todas las obligaciones que se derivarían del ámbito de protección de un derecho constitucional, pero no es un permiso al Estado para que deje de adoptar las medidas adecuadas y necesarias orientadas a cumplir las obligaciones en cuestión, valga repetir, progresivamente. Para la jurisprudencia “el que una prestación amparada por un derecho sea de carácter programático no quiere decir que no sea exigible o que eternamente pueda incumplirse.

3.3.9. Para la jurisprudencia constitucional, cuando el goce efectivo de un derecho constitucional fundamental depende del desarrollo progresivo, “*lo mínimo que debe hacer [la autoridad responsable] para proteger la prestación de carácter programático derivada de la dimensión positiva de [un derecho fundamental] en un Estado Social de Derecho y en una democracia participativa, es, precisamente, contar con un programa o con un plan encaminado a asegurar el goce efectivo de sus derechos*. Por ello, al considerar un caso al respecto, la Corte señaló que si bien el accionante ‘*no tiene derecho a gozar de manera inmediata e individualizada de las prestaciones por él pedidas, sí tiene derecho a que por lo menos exista un plan*’.

En consecuencia, se desconocen las obligaciones constitucionales de carácter prestacional y programático, derivadas de un derecho fundamental, cuando la entidad responsable de garantizar el goce de un derecho ni siquiera cuenta con un programa o con una política pública que le permita avanzar progresivamente en el cumplimiento de sus obligaciones correlativas. En la sentencia T-595 de 2002 se indicó al respecto lo siguiente,

*“No poder garantizar de manera instantánea el contenido prestacional del derecho es entendible por las razones expuestas; pero carecer de un programa que de forma razonable y adecuada conduzca a garantizar los derechos en cuestión es inadmisiblemente constitucionalmente. El carácter progresivo de la prestación no puede ser invocado para justificar la inacción continuada, ni mucho menos absoluta, del Estado. Precisamente por el hecho de tratarse de garantías que suponen el diseño e implementación de una política pública, el no haber comenzado siquiera a elaborar un plan es una violación de la Carta Política que exige al Estado no sólo discutir o diseñar una política de integración social [para discapacitados], sino adelantarla.”*

3.3.10. Concretamente, la jurisprudencia constitucional ha precisado tres condiciones básicas, a la luz de la Constitución Política, que debe observar toda política pública orientada a garantizar un derecho constitucional.

3.3.11. La primera condición es que la política efectivamente exista. No se puede tratar de unas ideas o conjeturas respecto a qué hacer, sino un programa de acción estructurado que le permita a la autoridad responsable adoptar las medidas adecuadas y necesarias a que haya lugar. Por eso, como se dijo, se viola una obligación constitucional de carácter prestacional y programática, derivada de un derecho fundamental, *cuando ni siquiera se cuenta con un plan* para progresivamente cumplirla. Así pues, en la sentencia T-595 de 2002, por ejemplo, - en lo que respecta a las dimensiones positivas de la libertad de locomoción de los discapacitados - al constatar que la entidad acusada violaba el derecho fundamental exigido, por no contar con un plan, la Corte resolvió, entre otras cosas, tutelar los derechos a la libertad de locomoción y a la igualdad del accionante, en razón a su discapacidad especialmente protegida.

3.3.12. La segunda condición es que la finalidad de la política pública debe tener como prioridad garantizar el goce efectivo del derecho. En tal sentido, por ejemplo, no puede tratarse de una política pública tan sólo simbólica, que no esté acompañada de acciones reales y concretas. Así pues, también se viola la Constitución cuando existe un plan o un programa, pero se constata que (i) “*sólo está escrito* y no haya sido iniciada su ejecución” o (ii) “que así se esté implementando, sea evidentemente *inane*, bien sea porque no es sensible a los verdaderos problemas y necesidades de los titulares del derecho en cuestión, o porque su ejecución se ha diferido indefinidamente, o durante un período de tiempo irrazonable”.

3.3.13. La tercera condición es que los procesos de decisión, elaboración, implementación y evaluación de la política pública permitan la participación democrática. En tal sentido, la jurisprudencia ha considerado inaceptable constitucionalmente que exista un plan (i) ‘*que no abra espacios de participación para las diferentes etapas del plan*’, o (ii) ‘*que sí brinde espacios, pero éstos sean inocuos y sólo prevean una participación intrascendente.*’ Cuál es el grado mínimo de participación que se debe garantizar a las personas, depende del caso específico que se trate, en atención al tipo de decisiones a tomar. Por ejemplo, en la sentencia T-595 de 2002, a propósito de la protección de la libertad de locomoción en el contexto del transporte público, la Corte indicó, con base en el pronunciamiento expreso del legislador, que el alcance mínimo que se debía dar a la participación ciudadana en esta área, debía contemplar “*por lo menos, a la ejecución y al sistema de evaluación del plan que se haya elegido.*” La Corte resolvió proteger el derecho a la participación del accionante, en su condición de miembro de organizaciones para la defensa de las personas con discapacidad.

3.3.14. En conclusión, la faceta prestacional y progresiva de un derecho constitucional permite a su titular exigir judicialmente, por lo menos, (1) la existencia de una política pública, (2) orientada a garantizar el goce efectivo

del derecho y (3) que contemple mecanismos de participación de los interesados.

3.3.15. En el caso en que el juez de tutela constata la violación de una faceta prestacional de un derecho fundamental, debe protegerlo adoptando órdenes encaminadas a garantizar su goce efectivo, pero que a su vez sean respetuosas del proceso público de debate, decisión y ejecución de políticas, propio de una democracia. Por tanto, no es su deber indicar a la autoridad responsable, específicamente, cuáles han de ser las medidas adecuadas y necesarias para garantizar el goce efectivo del derecho, pero sí debe adoptar las decisiones y órdenes que aseguren que tales medidas sean adoptadas, promoviendo a la vez la participación ciudadana. Así por ejemplo, en la sentencia T-595 de 2002, la Corte resolvió ordenar a la entidad acusada que en el término máximo de dos años, diseñara un plan orientado a garantizar el *acceso* del accionante al Sistema de transporte público básico de Bogotá, sin tener que soportar limitaciones que supongan cargas excesivas, y que una vez diseñado el plan, iniciara inmediatamente el proceso de ejecución, de conformidad con el cronograma incluido en él. Se impartieron pues las órdenes necesarias para que el derecho sea protegido, sin indicar concretamente cuál es el diseño de política pública que se ha de adoptar para garantizar el goce efectivo del derecho.

#### **3.4. Caracterización del derecho a la salud en el bloque de constitucionalidad, clases de obligaciones derivadas del derecho a la salud (*respetar, proteger y garantizar*)**

La Sala de Revisión incluye en la presente sentencia un anexo sobre la génesis y evaluación del derecho a la salud en el ámbito internacional (ver el Segundo Anexo). No obstante, en esta sección es pertinente recordar las categorías analíticas mediante las cuales han sido caracterizadas las obligaciones derivadas de este derecho.

3.4.1. *Las Observaciones del Comité de Derechos Económicos, Sociales y Culturales* (CESCR) A partir de 1989, el Comité adopta ‘observaciones generales’ acerca del *Pacto Internacional de Derechos Económicos, Sociales y Culturales* (PIDESC, 1966) en desarrollo de su función primordial, vigilar la aplicación del Pacto por los Estados Partes. Para el Comité, el PIDESC reconoce que los estados tienen tres tipos de obligaciones, derivadas de los derechos reconocidos, obligaciones de *respetar*, obligaciones de *proteger* y obligaciones de *garantizar*.

3.4.2. El más amplio desarrollo acerca del derecho a la salud, su alcance y significado, lo ha realizado el Comité de Derechos Económicos, Sociales y Culturales, en la *Observación General N°14* (2000) acerca ‘*el derecho al disfrute del más alto nivel posible de salud*’.

3.4.2.1. De manera clara y categórica, la Observación General N°14 (2000) establece que ‘*la salud es un derecho humano fundamental e indispensable*

*para el ejercicio de los demás derechos humanos*'. Al respecto, el Comité insiste en la indivisibilidad e interdependencia del derecho a la salud en tanto está 'estrechamente vinculado con el ejercicio de otros derechos humanos y depende de esos derechos', refiriéndose de forma específica al 'derecho a la alimentación, a la vivienda, al trabajo, a la educación, a la dignidad humana, a la vida, a la no discriminación, a la igualdad, a no ser sometido a torturas, a la vida privada, al acceso a la información y a la libertad de asociación, reunión y circulación'. Para el Comité, 'esos y otros derechos y libertades abordan los componentes integrales del derecho a la salud'.

3.4.2.2. El Comité advierte que 'todo ser humano tiene derecho al disfrute del más alto nivel posible de salud que le permita vivir dignamente', y resalta que se trata de un derecho ampliamente reconocido por los tratados y declaraciones internacionales y regionales, sobre derechos humanos. Observa el Comité que el concepto del '*más alto nivel posible de salud*' contemplado por el PIDESC (1966), tiene en cuenta tanto las condiciones biológicas y socioeconómicas esenciales de la persona como los recursos con que cuenta el Estado, en tal sentido es claro que éste no está obligado a garantizar que toda persona goce, en efecto, de 'buena salud', sino a garantizar "toda una gama de facilidades, bienes y servicios" que aseguren el *más alto nivel posible de salud*. En tal sentido, considera que 'el derecho a la salud debe entenderse como un derecho al disfrute de toda una gama de facilidades, bienes, servicios y condiciones necesarios para alcanzar el más alto nivel posible de salud'; entre ellos 'la alimentación y la nutrición, la vivienda, el acceso a agua limpia potable y a condiciones sanitarias adecuadas, condiciones de trabajo seguras y sanas y un medio ambiente sano.'

3.4.2.3. 'El derecho a la salud entraña libertades y derechos', señala el Comité, indicando como ejemplo de las libertades 'el derecho a controlar su salud y su cuerpo' o 'el derecho a no ser sometido a torturas ni a tratamientos y experimentos médicos no consensuales'. Entre los derechos, se presenta como ejemplo 'el relativo a un sistema de protección de la salud que brinde a las personas oportunidades iguales para disfrutar del más alto nivel posible de salud'.

3.4.2.4. El Comité advierte que desde la adopción de los dos Pactos Internacionales de las Naciones Unidas en 1966, '*la situación mundial de la salud se ha modificado de manera espectacular*', al paso que el concepto de la salud ha experimentado cambios importantes en cuanto a su contenido y alcance. En tal sentido, el Comité considera que al interpretar el artículo 12 del PIDESC, se debe tener en cuenta que enfermedades anteriormente desconocidas, "como el virus de la inmunodeficiencia humana y el síndrome de la inmunodeficiencia adquirida (VIH/SIDA), y otras enfermedades, como el cáncer, han adquirido mayor difusión, así como el rápido crecimiento de la población mundial, han opuesto nuevos obstáculos al ejercicio del derecho a la salud". El Comité advierte que para millones de personas, en especial las más pobres, '*el pleno disfrute del derecho a la salud continúa siendo un objetivo remoto*'.

3.4.2.5. El artículo 12, PIDESC, contempla ámbitos de protección específicos del derecho a la salud, los cuales son precisados por el Comité en su *Observación General N°14* (2000). Así, se pronuncia sobre lo que implica (1) garantizar ‘*la salud infantil, materna y reproductiva*’, (2) el deber de mejorar ‘*la higiene ambiental e industrial*’; (3) la ‘*lucha contra las enfermedades*’, en especial las epidémicas, endémicas, profesionales y de otra índole; y (4) el derecho a que se ‘*creen las condiciones que aseguren a todos asistencia médica y servicios médicos en caso de enfermedad*’.

3.4.2.6. El Comité de Derechos Económicos, Sociales y Culturales, considera que el derecho a la salud “en todas sus formas y a todos los niveles” abarca cuatro elementos esenciales e interrelacionados, cuya aplicación dependerá de las condiciones prevalecientes en un determinado Estado Parte, a saber, *disponibilidad, accesibilidad, aceptabilidad y calidad*. (i) Cada estado debe tener *disponibles* “un número suficiente de establecimientos, bienes y servicios públicos de salud y centros de atención de la salud, así como de programas.” (ii) Los establecimientos, bienes y servicios de salud deben ser *accesibles* a todos, sin discriminación alguna, en cuatro dimensiones superpuestas: (a) ‘*no discriminación*’, los establecimientos, bienes y servicios de salud deben ser accesibles, de hecho y de derecho, a los sectores más vulnerables y marginados de la población, sin discriminación alguna; (b) ‘*accesibilidad física*’, los establecimientos, bienes y servicios de salud deberán estar al alcance geográfico de todos los sectores de la población, en especial los grupos vulnerables o marginados; (c) ‘*accesibilidad económica*’ (asequibilidad), los establecimientos, bienes y servicios de salud deberán estar al alcance de todos, en especial, la equidad exige que sobre los hogares más pobres no recaiga una carga desproporcionada, en lo que se refiere a los gastos de salud, en comparación con los hogares más ricos; y (d) ‘*acceso a la información*’, el derecho de solicitar, recibir y difundir información e ideas acerca de las cuestiones relacionadas con la salud, sin perjuicio de la debida confidencialidad. (iii) Los establecimientos, bienes y servicios de salud deberán ser (*aceptables*) respetuosos de la ética médica y culturalmente apropiados, es decir respetuosos de la cultura de las personas, las minorías, los pueblos y las comunidades, a la par que sensibles a los requisitos del género y el ciclo de vida, y deberán estar concebidos para respetar la confidencialidad y mejorar el estado de salud de las personas de que se trate.” (iv) Además de aceptables desde el punto de vista cultural, los establecimientos, bienes y servicios de salud deberán ser también de buena *calidad*, apropiados desde el punto de vista científico y médico.

3.4.2.7. Con relación al cumplimiento de las obligaciones que se derivan del derecho a la salud, el Comité resalta que el derecho a la salud impone a los Estados obligaciones inmediatas como (i) la garantía de que será ejercido sin discriminación alguna (párrafo 2 del artículo 2) y (ii) la obligación de adoptar medidas (párrafo 1 del artículo 2) en aras de la plena realización del artículo 12 (PIDESC), indicando que las medidas deben ser *deliberadas y concretas*, y su finalidad debe ser ‘la plena realización del derecho a la salud’. Reitera

también, que la ‘realización progresiva del derecho a la salud a lo largo de un determinado período’ implica la obligación *concreta y constante* de avanzar lo más *expedita y eficazmente* posible hacia el objetivo de la plena realización del derecho a la salud.

3.4.2.8. La Observación General N°14 (2000) resalta de forma especial, la obligación de no adoptar medidas ‘*deliberadamente regresivas*’ en cuanto a la plena realización del derecho a la salud, salvo que se demuestre que se optó por ellas “tras el examen más exhaustivo de todas las alternativas posibles y que esas medidas están debidamente justificadas por referencia a la totalidad de los derechos enunciados en el Pacto en relación con la plena utilización de los recursos máximos disponibles del Estado Parte”.

3.4.2.9. Para el Comité, al igual de lo que ocurre con los demás derechos, el derecho a la salud supone obligaciones de tres tipos, obligaciones de (i) *respeto*, obligaciones de (ii) *protección* y obligaciones de (iii) *cumplimiento* (denominadas también de *garantizar*).

La Sala de Revisión advierte que actualmente existe una discusión abierta en la jurisprudencia y la doctrina con relación a cuáles son las obligaciones que se derivan de un derecho fundamental. Existe un relativo acuerdo en lo que se refiere al tipo de obligaciones que estarían comprendidas en las dos clasificaciones iniciales, las obligaciones de *respetar* y de *proteger*, pero no así con la última. Las obligaciones de *cumplir*, denominadas por algunos autores como de *garantía*, de *asegurar* o de *satisfacer*, no se han caracterizado de forma pacífica. Así, por ejemplo, mientras que para la Observación General N° 14 las obligaciones de *cumplir* se dividen a su vez en obligaciones de ‘*facilitar*’, ‘*proporcionar*’ y ‘*promover*’, para algunos autores, además de las obligaciones de respetar y proteger, hay dos clases adicionales, las de asegurar, por un lado, y las promover, por otro.

3.4.2.9.1. El Comité indica que la obligación de *respetar* “exige que los Estados se abstengan de injerir directa o indirectamente en el disfrute del derecho a la salud”. De acuerdo con la Observación General N°14 (2000), la obligación de *respetar* el derecho a la salud, supone, en particular

“[abstenerse] de denegar o limitar el acceso igual de todas las personas, incluidos, los presos o detenidos, los representantes de las minorías, los solicitantes de asilo o los inmigrantes ilegales, a los servicios de salud preventivos, curativos y paliativos; abstenerse de imponer prácticas discriminatorias como política de Estado; y abstenerse de imponer prácticas discriminatorias en relación con el estado de salud y las necesidades de la mujer. Además, las obligaciones de respetar incluyen la obligación del Estado de abstenerse de prohibir o impedir los cuidados preventivos, las prácticas curativas y las medicinas tradicionales, comercializar medicamentos peligrosos y aplicar tratamientos médicos coercitivos, salvo en casos excepcionales para el tratamiento de

*enfermedades mentales o la prevención de enfermedades transmisibles y la lucha contra ellas.*

*[...] Asimismo, los Estados deben abstenerse de limitar el acceso a los anticonceptivos u otros medios de mantener la salud sexual y genésica, censurar, ocultar o desvirtuar intencionalmente la información relacionada con la salud, incluida la educación sexual y la información al respecto, así como impedir la participación del pueblo en los asuntos relacionados con la salud. Los Estados deben abstenerse asimismo de contaminar ilegalmente la atmósfera, el agua y la tierra, por ejemplo mediante los desechos industriales de las instalaciones propiedad del Estado, utilizar o ensayar armas nucleares, biológicas o químicas si, como resultado de esos ensayos, se liberan sustancias nocivas para la salud del ser humano, o limitar el acceso a los servicios de salud como medida punitiva, por ejemplo durante conflictos armados, en violación del derecho internacional humanitario.”*

3.4.2.9.2. La obligación de *proteger* “requiere que los Estados adopten medidas para impedir que terceros interfieran en la aplicación de las garantías prevista en el artículo 12” (PIDESC, 1966). De acuerdo con la Observación General N°14 (2000), las obligaciones de *proteger*

*“(…) incluyen, entre otras, las obligaciones de los Estados de adoptar leyes u otras medidas para velar por el acceso igual a la atención de la salud y los servicios relacionados con la salud proporcionados por terceros; velar por que la privatización del sector de la salud no represente una amenaza para la disponibilidad, accesibilidad, aceptabilidad y calidad de los servicios de atención de la salud; controlar la comercialización de equipo médico y medicamentos por terceros, y asegurar que los facultativos y otros profesionales de la salud reúnan las condiciones necesarias de educación, experiencia y deontología. Los Estados también tienen la obligación de velar por que las prácticas sociales o tradicionales nocivas no afecten al acceso a la atención anterior y posterior al parto ni a la planificación de la familia; impedir que terceros induzcan a la mujer a someterse a prácticas tradicionales, por ejemplo a la mutilación de los órganos genitales femeninos; y de adoptar medidas para proteger a todos los grupos vulnerables o marginados de la sociedad, en particular las mujeres, los niños, los adolescentes y las personas mayores, teniendo en cuenta los actos de violencia desde la perspectiva de género. Los Estados deben velar asimismo porque terceros no limiten el acceso de las personas a la información y los servicios relacionados con la salud.”*

3.4.2.9.3. La obligación de *cumplir* “requiere que los Estados adopten medidas apropiadas de carácter legislativo, administrativo, presupuestario, judicial o de otra índole para dar plena efectividad al derecho a la salud.” (i) Para el Comité

la obligación de *cumplir (facilitar)* “requiere en particular que los Estados adopten medidas positivas que permitan y ayuden a los particulares y las comunidades disfrutar del derecho a la salud”. (ii) La obligación de *cumplir (proporcionar)* un derecho específico enunciado en el Pacto “en los casos en que los particulares o los grupos no están en condiciones, por razones ajenas a su voluntad, de ejercer por sí mismos ese derecho con ayuda de los medios a su disposición” (iii) La obligación de *cumplir (promover)* el derecho a la salud “requiere que los Estados emprendan actividades para promover, mantener y restablecer la salud de la población.”

3.4.2.9.4. Esta clasificación de las obligaciones derivadas de un derecho tiene varias utilidades. Permite, entre otras cosas, caracterizar el tipo de violaciones a un derecho, distinguiendo las implicaciones jurídicas en cada caso. Así, por ejemplo, puede afirmarse que el hecho de que algunas de las obligaciones de *protección* que sean costosas y, además, de carácter progresivo, no impide, en forma alguna, la intervención del juez constitucional en casos en los que su deber consiste en evitar que se irrespete el derecho, removiendo las barreras que obstaculizan su goce efectivo. En otras palabras, la deferencia que el juez constitucional debe al debate democrático y a las normas de rango legal como parámetro para avanzar en el cumplimiento de las obligaciones de carácter progresivo de un derecho fundamental, no justifica que dicho juez desconozca su deber de garantizar el goce efectivo de un derecho en casos concretos, dentro del respeto a las normas de rango legal, dando aplicación a la Constitución y adoptando decisiones que usualmente se inscriben dentro de los vacíos dejados por normas infralegales o ineficiencias o mala prácticas de los actores.

Esta clasificación resalta el hecho de que todo derecho fundamental tiene facetas de carácter positivo y facetas de carácter negativo. En efecto, dentro de las obligaciones de respeto, de protección y de garantía, derivadas de un derecho fundamental como la salud, se entremezclan los dos tipos de facetas, obligaciones en las que se demanda ‘hacer’ algo al Estado o a ciertas entidades privadas responsables (positivas), y obligaciones en las que se les demanda ‘dejar de hacer’ algo (negativas). Así, por ejemplo, respetar el derecho a la salud puede implicar no realizar un experimento en contra de la voluntad de una persona, pero también puede implicar tomar las medidas adecuadas y necesarias para deshacerse de los residuos hospitalarios. De forma similar, la obligación de protección puede implicar la elaboración de una compleja política pública, por ejemplo en vacunación, pero también puede implicar dejar sin efecto una decisión administrativa o una determinada regulación.

3.4.2.10. La Observación General N°14 (2000), también fijó cuáles son algunas de las ‘*obligaciones básicas*’, que se entenderían incluidas dentro de los niveles esenciales del derecho, cuyo cumplimiento no puede ser diferido, así como algunas de las ‘*obligaciones prioritarias*’.

3.4.2.11. En cuanto a las violaciones de las obligaciones derivadas del derecho a la salud, el Comité advierte en la *Observación*, que se debe distinguir

claramente entre la ‘incapacidad’ del Estado para cumplir con alguna de las obligaciones y la ‘renuencia’ para cumplir. Un Estado viola las obligaciones derivadas del derecho a la salud, en la medida en que “no esté dispuesto a utilizar el máximo de los recursos de que disponga para [darle] efectividad al derecho.” En el caso de que el estado tenga una limitación de recursos para cumplir plenamente sus obligaciones, “tendrá que justificar no obstante que se ha hecho todo lo posible por utilizar todos los recursos de que dispone para satisfacer, como cuestión de prioridad, las obligaciones” derivadas del derecho a la salud. No obstante, el Estado “no puede nunca ni en ninguna circunstancia justificar su incumplimiento de las obligaciones básicas” antes mencionadas, las cuales, se señala, “son inderogables”. El Comité resalta que dentro de las “violaciones resultantes de *actos de comisión* figura la revocación o suspensión formal de la legislación necesaria para el continuo disfrute del derecho a la salud, o la promulgación de legislación o adopción de políticas que sean manifiestamente incompatibles con las preexistentes obligaciones legales nacionales o internacionales relativas al derecho a la salud.”; dentro de las violaciones resultado de no adoptar las medidas necesarias dimanantes de las obligaciones legales (*‘actos de omisión’*), “figuran el no adoptar medidas apropiadas para dar plena efectividad al derecho universal a disfrutar del más alto nivel posible de salud física y mental, el no contar con una política nacional sobre la seguridad y la salud en el empleo o servicios de salud en el empleo, y el no hacer cumplir las leyes pertinentes.” La Observación advierte también algunos de los casos en los que los Estados violan las obligaciones derivadas del Pacto, distinguiendo entre los diferentes tipos de obligaciones (*respetar, proteger y cumplir*).

3.4.2.12. Finalmente, el Comité resalta que para lograr el pleno ejercicio del derecho a la salud, “es necesario adoptar una estrategia nacional”, “basada en los principios de derechos humanos” y que tenga en cuenta “los recursos disponibles”, con base en la cual se formulen políticas y se establezcan los indicadores y las bases de referencia correspondientes del derecho a la salud. La formulación de la política que se implemente, debe contar con la participación de las personas, en especial de aquellas que se verían afectadas por la decisión. El Estado debe garantizar la participación de las personas en (i) la fijación de prioridades, (ii) la adopción de decisiones, (iii) la planificación, (iv) la aplicación y (v) la evaluación de las estrategias destinadas a mejorar la salud.’

### **3.5. Los límites del derecho a la salud. Ejemplos de limitaciones en el acceso a servicios.**

3.5.1. Como el derecho fundamental a la salud es limitable y, por lo tanto, el plan de beneficios no tiene que ser infinito sino que puede circunscribirse a cubrir las necesidades y a las prioridades de salud determinadas por los órganos competentes para asignar de manera eficiente los recursos escasos disponibles, la Corte Constitucional en numerosas sentencias ha negado servicios de salud solicitados por vía de tutela. Por ejemplo, la Corte ha negado los servicios estéticos. Si bien la obesidad puede en el largo plazo tener consecuencias para la salud de una persona, cada individuo también

tiene el deber de cuidar de su salud y por lo tanto, de velar por prevenir las enfermedades que se derivan del sobrepeso. Sólo cuando la obesidad llega a un grado tal que los peligros para la vida y la integridad de una persona se vuelven ciertos y difícilmente reversibles mediante una dieta, la cirugía prescrita por el médico tratante adquiere una relevancia constitucional que ha conducido a conceder la tutela. Lo mismo se ha aplicado a los tratamientos odontológicos, en la medida en que una buena dentadura o una dentadura completa son deseables, pero distan de ser necesarias para preservar la vida o la integridad personal o de ser indispensables para que se pueda vivir dignamente. Inclusive la Corte ha admitido que el plan de beneficios excluya los tratamientos de fertilidad. La lista de ejemplos de servicios de salud que la Corte ha admitido que sean excluidos del POS - y no autorizados, así el médico tratante los haya prescrito - podría continuar; pero no es necesario describir exhaustivamente todos los tipos de casos en los cuales se ha admitido que el derecho a la salud tiene límites, razonables y justificados constitucionalmente.

3.5.2. A continuación se recuerdan algunos de estos ejemplos en los cuales la Corte ha negado la acción de tutela admitiendo que el servicio de salud prescrito por el médico no está en el POS y la Constitución no ordena que sea autorizado porque su exclusión no desconoce aspectos importantes de la salud o de la vida del interesado:

(i) *Servicios de salud estéticos*: En sentencia T-749 de 2001, se negó una cirugía reconstructiva mamaria a una mujer que quería mejorar la apariencia física de sus senos. En sentencia T-490 de 2006, se negó una depilación por láser a un hombre que padecía de Pseudofolliculitis de la Barba, enfermedad que consiste en que los vellos de la barba se le incrustan en la piel, por lo cual el actor se veía forzado a sacárselos con un alfiler. En sentencia T-198 de 2004, se negó una cirugía plástica a una mujer que tras haber recibido tratamiento por un herpes infeccioso se le diagnosticó cicatriz irregular antiestética sobre el ala nasal izquierda. Esta Corporación adujo que de acuerdo a lo indicado por el médico tratante, se trata de una operación que no está dirigida a lograr la recuperación funcional de la demandante, sino que persigue exclusivamente fines estéticos. En sentencia T-676 de 2002, la Corte negó tratamientos originados como consecuencia de complicaciones de cirugía estética. En sentencia T-073 de 2007, se concluyó que los derechos a la salud y a la integridad personal del hijo de la accionante, no fueron vulnerados por la entidad demandada al negar el medicamento para el acné ordenado por su médico tratante, no contemplado por el Plan Obligatorio de Salud. La Juez de Instancia concluyó que la afección a la salud que padece el menor no vulnera ni pone en riesgo su salud, su vida o su integridad personal. Se trata de una enfermedad común de la adolescencia y no hay indicio en el expediente de que la situación del menor sea especialmente grave, además la demandante no probó que no pueda pagarlo, ni impugnó el fallo, ni aportó las pruebas solicitadas. En sentencia T-476 de 2000, la Corte negó una mamoplastia reductora porque no tiene fines terapéuticos ni se afecta la salud de la demandante. En sentencia T-539 de 2007, negó una mamoplastia reductora porque no existe un riesgo inminente y grave, además, no se afecta la salud de

la actora. En sentencia T-757 de 1998, la Corte negó una cirugía de quiste sobre ceja derecha que no afecta su vida e integridad personal ni implica limitación funcional. Usualmente la Corte ha considerado que los tratamientos estéticos deben ser costeados por el interesado, así ello represente una carga económica elevada.

(ii) *Gafas y cirugía ojos*: En sentencia T-1036 de 2000, la Corte negó el cambio de gafas a una paciente que sólo había cumplido 3 años con los lentes, y el cambio sólo puede hacerse cada 5 años. Esta Corporación argumentó que la no entrega de los nuevos lentes recetados, no es una circunstancia que ponga en peligro la vida de la accionante o lesione sus derechos fundamentales. En sentencia T-1008 de 2006, negó el cambio de unas gafas a una paciente que llevaba un año con los lentes pero según el concepto de un médico de la EPS, éstos fueron mal formulados porque no deberían ser bifocales. La Corte señaló que la actora no acreditó que las gafas que se le formularon y suministraron el año inmediatamente anterior por parte del Seguro Social fueron mal recetadas y que por ello requiera de unas nuevas, pues solo aportó una formula expedida por una optómetra en un formato de solicitud de examen de laboratorio. En sentencia T-409 de 1995, negó una cirugía refractiva para corregir problemas visuales a un hombre que padecía de miopía y astigmatismo y se negaba a usar gafas por la incomodidad y mal aspecto físico que le producía su uso. Esta Corporación precisó que no es la tutela el mecanismo idóneo para hacer efectivo el derecho pretendido por el actor, pues en la protección del derecho a la salud existe una esfera o ámbito que se vincula con el derecho a la vida y, por lo tanto, bajo este aspecto se le reconoce como un derecho fundamental.

(iii) *Tratamientos de fertilidad*: En sentencia T-698 de 2001, negó una laparoscopia operatoria a una mujer que padecía una enfermedad de su aparato reproductor caracterizada por la inflamación de los ovarios y dolor pélvico persistente, igualmente se le diagnosticó un hidrosalpinx en el lado derecho. Esta Corporación argumentó que no procede la acción de tutela como mecanismo para lograr la extensión del Plan Obligatorio de Salud a un servicio que se encuentra excluido de él. En sentencia T-946 de 2002, negó el tratamiento de fertilidad consistente en inseminación y fecundación *in-vitro* a una mujer que sufría de endometriosis severa, hidrosalpinx y fibroplastia. La Corte reiteró que el tratamiento se encontraba excluido del POS y no era posible ordenarlo mediante tutela y señaló que no es obligación del Estado garantizar la procreación a través de los planes obligatorios de salud. En sentencia T-752 de 2007, negó una fertilización *in-vitro* a una mujer beneficiaria del régimen subsidiado que tenía problemas para quedar embarazada. Esta Corporación argumentó que no existe violación de derechos fundamentales por la negación del tratamiento solicitado porque la exclusión que de dicho tratamiento se ha hecho de los servicios comprendidos dentro del Plan Obligatorio de Salud constituye el legítimo desarrollo de la facultad de configuración legal, que es totalmente coherente con la necesidad de implementar un Sistema de Seguridad Social en Salud que se atenga al principio de universalidad y a su garantía a todos los habitantes del territorio nacional.

(iv) *Tratamiento de desintoxicación*: En sentencia T-1060 de 2002, la Corte negó un tratamiento de desintoxicación alcohólica.

(v) *Prótesis*: En sentencia T-1123 de 2000, la Corte negó el suministro del medicamento Rinocort y prótesis para la pierna derecha del accionante. La Corte concluye que no hay elementos de juicio que permitan sustentar una orden de tutela que determinen dar una droga y una prótesis que no figuran en el POS. En sentencia T-820 de 2001, negó el mantenimiento de prótesis del pie solicitado por el demandante, por cuanto la salud del actor no se encuentra afectada de tal manera que sus derechos constitucionales fundamentales a la vida o a la integridad personal se encuentren vulnerados.

(vi) *By pass gástrico*: En sentencia T-1078 de 2007, negó una cirugía de Bypass gástrico por laparoscopia a persona con obesidad mórbida, porque la actora no ha explorado otros tratamientos y se niega a seguir dietas y ejercicios. En sentencia T-867 de 2006, la Corte no ordenó una cirugía de Bypass gástrico por laparoscopia por cuanto no se afectaba la vida de la accionante.

(vii) *Servicios de odontología*: En sentencia T-343 de 2003, la Corte negó una cirugía periapical (tratamiento bucal) por cuanto no amenazan la vida e integridad personal del actor ni ha sido ordenada por el médico tratante. En sentencia T-1276 de 2001, negó un tratamiento odontológico a un hombre que sufrió un accidente y perdió 11 dientes del maxilar inferior. Esta Corporación adujo como el actor no aportó ninguna prueba que demostrara su incapacidad económica para costear el suministro solicitado, se considera que en el presente caso no se cumplen con los presupuestos fijados por esta Corporación para hacer viable la procedencia de la acción de tutela.

(viii) *Alergias*: En la sentencia T-1289 de 2005, negó la acción de tutela porque resulta improcedente para lograr el suministro de vacunas antialérgicas. Incluso otras vacunas han sido negadas.

Los casos aquí presentados versan sobre limitaciones a uno de los ámbitos de protección del derecho a la salud más importante, a saber, el acceso a los servicios de salud. En la medida que los casos acumulados para ser resueltos conjuntamente en la presente sentencia versan sobre diversos aspectos del derecho a acceder a los servicios de salud (*ver el capítulo 2*), pasa la Corte a continuación a señalar las reglas jurisprudenciales establecidas al respecto.

#### **4. El acceso a servicios de salud de calidad y de manera oportuna y eficaz, garantizado por el derecho fundamental a la salud**

El derecho fundamental a la salud, comprende, entre otros, el derecho a acceder a servicios de salud de manera oportuna, eficaz y con calidad, el cual ha sido objeto de la mayoría de acciones de tutela. A continuación pasa la Sala a indicar el alcance y contenido de este derecho de acceso a la salud a la luz de

la jurisprudencia constitucional, resaltando las reglas aplicables a los casos que forman parte del presente proceso. También se resaltarán aquellos casos en los que el juez constitucional haya tenido que enfrentar algunos de los mayores obstáculos y barreras existentes y persistentes en el Sistema, para acceder a los servicios de salud, relacionados con los mismos.

#### **4.1. Existencia de un Sistema de Salud que garantice el acceso a los servicios de salud**

4.1.1. La primera condición para poder garantizar el derecho de toda persona al acceso a los servicios de salud en los términos constitucionales (art. 49, CP) es, precisamente, que existan un conjunto de personas e instituciones que presten tales servicios. Este Sistema puede ser del tipo que democráticamente decida el legislador, siempre y cuando tenga como prioridad, garantizar en condiciones de universalidad el goce efectivo del derecho a la salud dentro de los parámetros constitucionales.

4.1.2. La jurisprudencia constitucional ha señalado que en el Sistema de Seguridad Social *‘la persona se afilia al sistema, no a una de las entidades integrantes del mismo’*. Por tanto, en los casos en que de forma extraordinaria, la regulación permita tener en cuenta la antigüedad o el número de semanas cotizadas para efectos de determinar si determinada prestación está o no cubierta, “debe contarse el tiempo de vinculación al sistema y no el de cotización a la empresa de salud específicamente considerada.” Tampoco existe distinción al respecto, entre el régimen contributivo y el régimen subsidiado. Recientemente, el Legislador señaló que *‘a los afiliados se les contabilizará el tiempo de afiliación en el Régimen Subsidiado o en cualquier EPS del Régimen Contributivo, para efectos de los cálculos de los períodos de carencia’* (lit, g, art. 14, Ley 1122 de 2007). En todo caso, como se señalará posteriormente, la exigencia de semanas cotizadas no puede ser, en ningún caso, un obstáculo que impida el acceso a los servicios de salud que una persona *requiera con necesidad*. [ver apartados 4.4.3. y 4.4.5.].

4.1.3. Como se indicó, para que efectivamente toda persona pueda acceder a los servicios de salud, al Estado le corresponde, por mandato constitucional (art. 49, CP), cumplir las siguientes obligaciones: (i) *organizar*, (ii) *dirigir* y (iii) *regular* la prestación de los servicios de salud; (iv) establecer las políticas para la prestación de los servicios por parte de entidades privadas, y ejercer (v) su *vigilancia* y (vi) *control*; (viii) establecer las competencias de la Nación, las entidades territoriales y los particulares, y (ix) determinar los aportes a su cargo en los términos y condiciones señalados en la ley. Así pues, es obligación del Estado establecer el Sistema; definir qué entidades y personas lo pueden integrar, y qué labores puede desempeñar cada uno; cómo pueden los particulares participar en la prestación de los servicios y en qué términos; así como también, establecer quiénes aportan al Sistema y en qué cantidades, esto es, definir el flujo de recursos del Sistema.

4.1.4. La legislación y la jurisprudencia constitucional han precisado, dentro

de sus respectivos ámbitos de competencia, las obligaciones estatales derivadas del derecho a la salud, para garantizar la existencia de un sistema de salud que preste efectivamente, en condiciones de universalidad, eficiencia y solidaridad, los servicios de salud que requieran las personas para alcanzar el nivel más alto de salud posible dadas las condiciones y capacidades existentes.

4.1.5. La jurisprudencia constitucional ha señalado que la función de regulación de las actividades de un sector es variada y de muchos tipos, pero que depende, básicamente, de cuáles sean las condiciones específicas del sector, y los cometidos especiales o fines que haya fijado el Constituyente o el legislador a dicho sector. *El Estado tiene entonces, la obligación de regular el sector de la salud, orientándolo a garantizar el goce efectivo del derecho a la salud.* En tal sentido, por ejemplo, se viola el derecho a la salud cuando la regulación desconoce un ámbito de protección constitucional. Así, la Corte ha considerado que un sistema de tarifas para la prestación de todos los servicios de salud en el cual se contemplen tarifas incluso para la atención básica, por mínimas que éstas sean, es inconstitucional, en la medida en que la Constitución Política obliga al legislador a reconocer ‘una atención básica gratuita’ del servicio de salud (art. 49, CP). Esta decisión fue reiterada posteriormente por la Corte, al evaluar la constitucionalidad del sistema tarifario contemplado por la Ley 1122 de 2007, el cual se consideró ajustado a la Constitución, en la medida que no excluye la definición de servicios ‘gratuitos’ en atención básica.

4.1.6. El Sistema General de Seguridad Social en Salud, en su conjunto, es un servicio público esencial. Es además un ‘servicio público obligatorio, cuya dirección, coordinación y control están a cargo del Estado’ (art. 4º, Ley 100 de 1993). En tal sentido el Estado tiene la obligación de crear las reglas necesarias para que las diferentes entidades e instituciones del sector de la salud puedan garantizar efectivamente la prestación de los servicios que sean requeridos por las personas dentro del Sistema de Salud. El Estado desprotege el derecho a la salud cuando permite que existan vacíos o lagunas en la regulación, que se constituyan en barreras de acceso a los servicios de salud. Por ejemplo, la Corte consideró que se viola el derecho a la salud de una persona cuando existe una ‘laguna’ normativa en la regulación, por no definir los mecanismos de solución de controversias para los eventos en los que se presenten conflictos entre los actores que deciden autorizar la prestación del servicio. Tal situación ocurría, por ejemplo, con los conflictos que se dan entre el médico tratante y el Comité Técnico Científico, en torno a la definición de si una persona requería o no un determinado medicamento (*ver apartado 4.4.4.*). Es pues imprescindible para garantizar el goce efectivo del derecho a la salud de las personas, que el Estado cumpla con su obligación de crear la reglamentación adecuada para posibilitar la implementación de las políticas públicas en salud. El incumplimiento de esta obligación supone pues, una desprotección del derecho a la salud por parte del Estado.

Ahora bien, no se desprotege el derecho a la salud, sino que se irrespeta, cuando sí existe una regulación aplicable, pero ésta se constituye en un

obstáculo al acceso a los servicios de salud. Tal situación ocurría, por ejemplo, con la reglamentación de *‘los procedimientos de recobro ante las entidades del Fondo de Solidaridad y Garantía, Fosyga por concepto de suministro de medicamentos no incluidos en el Plan Obligatorio de Salud’* (Resolución 3797 de 2004), que imponía una carga a las entidades de garantizaban el goce efectivo del derecho a la salud a las persona de manera oportuna y eficiente, a la vez que premiaba a las entidades que desconocían flagrantemente el derecho a la salud de las personas, dándoles ventajas. En efecto el artículo 19 de la Resolución 3797 de 2004 establecía el monto que el Fosyga debía reconocer por el recobro de medicamentos no incluidos en el Plan Obligatorio de Salud, con y sin homólogo dentro del Plan, que hubiesen sido autorizados por el Comité Técnico Científico de la entidad u ordenados por una sentencia de tutela. Para el primer caso –literal *a* de la norma, los medicamentos con homólogo–, se establecía que el Fosyga reconocería *‘el resultante de restar al valor de la cantidad del medicamento autorizado (...) u ordenado (...), según la factura del proveedor, el valor de la cantidad del medicamento homólogo’*, listado dentro del Plan Obligatorio. Para el segundo caso –literal *b* de la norma, los medicamentos sin homólogo dentro del Plan–, la regla de recobro era que el Fosyga reconocería *‘el 50% del valor de la cantidad del medicamento autorizado (...) u ordenado (...), según la factura de venta’*. Ahora bien, luego de haber establecido un tratamiento igual a los recobros de medicamentos no incluidos en el Plan Obligatorio de Salud, bien sea que hubiesen sido autorizados por el Comité Técnico Científico de la entidad u ordenados por un juez de tutela, la regulación introduce un incentivo económico a las entidades cuyos Comités nieguen la autorización del servicio solicitado y se dejen demandar mediante acción de tutela. Así, el inciso final del artículo 19 de la Resolución 3797 de 2004 establecía lo siguiente,

*‘En el evento de que la EPS, EOC o ARS demuestre mediante acta fechada con anterioridad a la fecha del fallo de tutela que su Comité Técnico Científico tramitó en debida forma la solicitud del medicamento, pero que por pertinencia demostrada o por no cumplir con los criterios de autorización fue negado, el monto a reconocer y pagar por los medicamentos de que tratan los literales (a) y (b) del presente artículo, será el total del valor fracturado por el proveedor. Por estos efectos, se deberá anexar el acta del CTC como soporte del recobro.’*

En otras palabras, la entidad que negaba las autorizaciones de los medicamentos autorizados por una persona y luego era condenada a garantizar su suministro mediante una acción de tutela, podía recobrar el 100% del valor del medicamento no incluido dentro del Plan Obligatorio de Salud, mientras que las entidades que autorizaban el suministro de un medicamento a un persona, sólo podían recobrar el 50% de su valor, o la diferencia entre éste y el valor de un medicamento homólogo contemplado dentro del Plan Obligatorio, según fuera el caso. Esta regulación era pues, un claro incentivo a que las entidades encargadas de garantizar la prestación de servicios de salud negaran los medicamentos requeridos, propiciaran la interposición de acciones de tutela en su contra y pudieran así, recobrar la totalidad del valor autorizado y

no sólo una parte del mismo. Esta situación fue reconocida por el Ministerio de la Protección Social en una de las participaciones dentro del presente proceso. El Ministerio dijo al respecto,

*“Parte del incremento inusitado de tutelas no-POS se podría explicar por los incentivos implícitos que había para las EPS en el procedimiento de recobro, que fueron corregidos a partir de noviembre de 2006, (...). Hay razones para anticipar una disminución en el caudal de tutelas no-POS a raíz de los cambios recientemente introducidos en el procedimiento de recobro.”*

Actualmente el monto de los recobros se encuentra regulado en el artículo 25 de la Resolución 2933 de 2006, que no contempla la regla que incentivaba la interposición de acciones de tutela.

En conclusión, cuando el Estado omite expedir la regulación que se requiere para garantizar el goce efectivo del derecho a la salud, lo desprotege. Pero cuando la regulación sí existe, pero ésta incentiva que se obstaculice el acceso a los servicios requeridos, la regulación contribuye al irrespeto del derecho a la salud.

4.1.7. La regulación que sea creada por el Estado para garantizar la prestación de los servicios de salud debe estar orientada de forma prioritaria a garantizar el goce efectivo de todas las personas al derecho a la salud, en condiciones de universalidad, eficiencia, solidaridad y equidad. Al respecto ha dicho la Corte,

*“Los derechos a la vida, la salud y la integridad de las personas residentes en Colombia depende, en gran medida, de la adecuada prestación del servicio por parte de las E.P.S., las A.R.S. y demás entidades. Sin embargo, para que estas entidades puedan cumplir con la misión que se les ha encomendado, es preciso que exista un marco regulatorio claro, que se adecue a los postulados constitucionales y legales sobre la materia. Sin éste, se pueden presentar infinidad de vacíos y dificultades de orden legal, de carácter administrativo, que impliquen demoras o retrasos en la prestación del servicio. Es decir, una mala regulación, bien sea por confusa, incompleta o contraria a postulados constitucionales, puede ser la causa de violaciones a los derechos fundamentales de los pacientes.”*

Expresamente, mediante la Ley 1122 de 2007 que reformó el Sistema de Salud, el Congreso ordenó que la evaluación de los actores del sector se haga ‘a través de indicadores de gestión y resultados en salud y bienestar de todos los actores que operan en el Sistema General de Seguridad Social en Salud’. El Legislador fijó un plazo de seis meses, contados a partir de la entrada en vigencia de la ley, al Ministerio de la Protección Social, órgano rector del Sistema, para establecer los mecanismos que permitan realizar esta evaluación. Dispuso también que ‘como resultado de esta evaluación, podrá

definir estímulos o exigir, entre otras, la firma de un convenio de cumplimiento, y si es del caso, solicitará a la Superintendencia Nacional de Salud suspender en forma cautelar la administración de los recursos públicos, hasta por un año de la respectiva entidad (...)'.

Este parámetro que debe observar la regulación, lo reconoció la Corte al estudiar una demanda de inconstitucionalidad en contra de la competencia que otorga la Ley a la Comisión de Regulación en Salud para fijar tarifas para los servicios de salud, ligando el monto de la misma al lugar en el que la entidad haya sido clasificada en razón a su evaluación y a su desempeño.

4.1.8. A partir de la expedición de la Ley 1122 de 2007, se crea una nueva institución para regular el sistema de salud: la Comisión de Regulación en Salud –CRES–, que ejerce la facultad estatal de regulación en el ámbito de la salud. El Consejo Nacional de Seguridad Social en Salud permanece, pero como ente consultor. Entre otras funciones, corresponde a la CRES (art. 7, Ley 1122 de 2007), (1) definir y modificar los Planes Obligatorios de Salud (POS) que las Entidades Promotoras de Salud (EPS) garantizarán a los afiliados según las normas de los Regímenes Contributivo y Subsidiado; (2) definir y revisar, como mínimo una vez al año, el listado de medicamentos esenciales y genéricos que harán parte de los Planes de Beneficios; (3) definir el valor de la Unidad de Pago por Capitación de cada Régimen.

## **4.2. Pertenencia al Sistema y garantía de la prestación de servicios de salud**

4.2.1. Toda persona tiene el derecho de pertenecer al Sistema de Salud, por sus características de universalidad. La Ley 100 de 1993 contempla dos formas posibles; la de ‘afiliado’ dentro de alguno de los dos regímenes, contributivo o subsidiado, o, por defecto y temporalmente, como ‘*participante vinculado*’. Ahora bien, los afiliados en el régimen contributivo pueden ser de dos tipos, los afiliados propiamente dichos, que son aquellas personas que cotizan al sistema, y los beneficiarios, que son aquellas personas que hacen parte del Sistema a través de un afiliado.

Aunque la persona que se encuentra tan sólo vinculada al sistema, tiene derecho a acceder a los servicios de salud que requiera, su condición implica, en sí misma, sinnúmero de obstáculos a la prestación de aquellos. El Congreso, mediante la Ley 715 de 2001, artículo 13, derogó el segundo inciso del literal B, del artículo 157 de la Ley 100 de 1993, el cual señalaba lo siguiente: ‘*A partir del año 2000, todo colombiano deberá estar vinculado al Sistema a través de los regímenes contributivo o subsidiado, en donde progresivamente se unificarán los planes de salud para que todos los habitantes del territorio nacional reciban el Plan Obligatorio de Salud de que habla el artículo 162.*’ Recientemente, el Congreso fijó un nuevo plazo para el cumplimiento de la obligación de garantizar una cobertura universal del sistema de salud, en los siguientes términos: ‘El Sistema General de Seguridad Social en Salud alcanzará en los próximos tres años, la cobertura universal de aseguramiento en los niveles I, II y III del Sisbén de las personas que cumplan

con los requisitos para la afiliación al Sistema’. (art. 9, Ley 1122).

4.2.2. La jurisprudencia constitucional ha reconocido el derecho constitucional de toda persona a que su empleador la afilie al sistema de seguridad social en salud, de acuerdo con la Constitución (art. 48, 49 y 53) y la ley (art. 152, num. 2, y art. 161, Ley 100 de 1993). En los casos en los que empleadores incumplen su obligación de respetar el derecho a la salud de sus empleados, al no afiliarlos al Sistema de Salud, la jurisprudencia ha tutelado sus derechos, reconociendo la responsabilidad del empleador de acuerdo con la ley. La jurisprudencia ha subrayado la importancia de la obligación de afiliar al empleado, incluso cuando la condición laboral ya no existe, si el incumplimiento de esta obligación representa una amenaza *grave e injustificada* a su dignidad y a su vida; tal situación ocurre, por ejemplo, al afectar el mínimo vital y poner en riesgo la subsistencia de una persona de la tercera edad, sujeto de especial protección constitucional. Así pues, una entidad *irrespetar* el derecho a la salud de una persona cuando se niega a garantizarle el acceso a los servicios de salud que requiera, en virtud del incumplimiento del empleador de dicha persona.

4.2.3. El Estado tiene la obligación de respetar el derecho a la salud de toda persona, permitiendo que acceda sin discriminación alguna al Sistema de Salud (art. 49, CP). En esa medida, no se puede *irrespetar* el derecho a la salud estableciendo obstáculos irrazonables y desproporcionados, que impidan a una parte de la población acceder al Sistema y a la prestación de servicios de salud, en condiciones de igualdad. En tal sentido, la jurisprudencia ha considerado, por ejemplo, que el legislador irrespetar el derecho a la salud por discriminar, al exigir a las familias conformadas mediante uniones maritales de hecho un requisito irrazonable –que transcurran dos años de relación– para acceder al Sistema de Salud, que no se exigía a las familias conformadas mediante matrimonio.

4.2.4. Para la jurisprudencia constitucional, toda persona tiene el derecho a que las entidades encargadas de garantizarle el acceso a los servicios de salud –EPS–, actúen con base en la información oficial que de ellos se cuente en el Sistema de Salud, la cual ha de ser ‘*veraz y actual*’. Por tal razón, en aquellos casos en los que la información registrada oficialmente no es adecuada, el juez de tutela debe identificar el remedio constitucional adecuado en cada situación particular. Tal es el caso del SISBEN, que se ha revelado en algunos casos como un método no adecuado para valorar la condición socio-económica real de algunas personas en casos específicos.

4.2.5. Cuando se constata que no existe claridad en la información que se tiene con relación a una persona en el SISBEN, o cuando la información que se tiene no refleja la condición socio-económica real de una persona la jurisprudencia constitucional ha ordenado a las autoridades respectivas que implementen nuevamente el mecanismo de clasificación. En varias ocasiones se ha ordenado a las EPS, IPS o entidades territoriales que actualicen su información acerca de la situación socio-económica de las personas, de

acuerdo a los registros oficiales adecuados, para que no les cobren pagos que no les corresponde asumir.

La protección del derecho a la salud y al *habeas data*, concretamente, el derecho de toda persona a conocer, actualizar y rectificar las informaciones que se hayan recogido sobre ellas en bancos de datos y en archivos de entidades públicas y privadas, y a que *‘en la recolección, tratamiento y circulación de datos se respetarán la libertad y demás garantías consagradas en la Constitución’* (art. 15, CP), puede llevar al juez constitucional a impartir las órdenes a las entidades encargadas de adoptar las medidas adecuadas y necesarias para evitar que una falla en la información obstaculice a una persona el acceso a los servicios de salud.

Así, por ejemplo, en la sentencia T-307 de 1999 la Corte consideró que una persona tiene derecho a que su información sea adecuadamente obtenida y usada en las bases de datos de las cuales depende el acceso a los programas de la seguridad social, en especial, de salud. Además de establecer que se había desconocido el derecho de petición y de *habeas data* al no haber tramitado adecuadamente su solicitud de ser encuestada y ‘beneficiaria del SISBEN’, la Corte señaló que también se le desconocía la posibilidad de participar en condiciones de igualdad en el proceso establecido para definir si tiene derecho o no a una determinada ayuda social. Dijo la Corte al respecto “(...) *como consecuencia de las actuaciones omisivas y dilatorias de las autoridades demandadas, la demandante no ha podido acceder al SISBEN y, en consecuencia, ha quedado el margen de aquellos programas sociales (v. supra) en los que, eventualmente, hubiera podido ser considerada como potencial beneficiaria, de haber sido adecuadamente atendida por los funcionarios responsables de la administración del mencionado sistema. || (...) la vigencia del principio de igualdad en los procesos de distribución de bienes escasos, consiste en garantizar a los eventuales beneficiarios de tales recursos un acceso igualitario a todas las etapas del procedimiento por medio del cual aquéllos son asignados. En consecuencia, la exclusión arbitraria de algún eventual beneficiario, amenaza seriamente su derecho a la igualdad y pone en peligro la realización efectiva de los fines del Estado social de Derecho.*” Aunque la Corte Constitucional tuteló en este caso los derechos de petición, participación, igualdad y *habeas data*, la motivación concreta de la accionante, en realidad, era la de garantizar a sus hijos el acceso a los servicios de salud, por eso, su reclamo original era que se le tutelara a ella el derecho de petición y a sus hijos el derecho a la salud.

Las órdenes del juez de tutela pueden implicar la adopción de un parámetro aplicable, de acuerdo con la Constitución y el orden legal vigente, cuando tal parámetro no existe en las regulaciones vigentes y es necesario para garantizar el goce efectivo de un derecho, hasta tanto el regulador ejerza sus competencias (*ver apartado 4.1.6*). Pero el juez de tutela también puede ordenar a una entidad del Estado que, hasta tanto el regulador encargado asuma sus competencias y establezca la regulación definitiva, fije temporalmente los parámetros aplicables, de acuerdo a las reglas democráticas

y de participación que correspondan. En el caso antes mencionado (sentencia T-307 de 1999), por ejemplo, la Corte, además de las fallas en la que incurrieron los servidores públicos comprometidos en los hechos, consideró que *“la situación a la que fue sometida la actora se explica por la falta de regulación del banco de datos del SISBEN.”* Indicó en esa ocasión que

*“En efecto, las personas que habitan en la ciudad de Ibagué y que son beneficiarias – potenciales o actuales – de los programas sociales cuya focalización se realiza mediante el mencionado Sistema, no tienen mecanismos específicos, claros y eficaces para enterarse de los datos personales que les conciernen y que reposan en el respectivo banco de datos. Tampoco existen instrumentos formales y eficaces a través de los cuales puedan solicitar el ingreso de sus datos al sistema o exigir que una información errónea, inexacta, incompleta o desactualizada, sea corregida o excluida del banco de datos. Por último, es evidente que no tienen la capacidad de controlar que la información por ellos suministrada se use exclusivamente para los fines para los cuales fue creado este mecanismo de focalización del gasto.*

*En suma, los hechos registrados demuestran que la entidad local, encargada de ejecutar y aplicar el SISBEN, no sólo ha vulnerado el derecho al habeas data de la [accionante], sino que ha generado una circunstancia que amenaza los derechos de los beneficiarios – potenciales y actuales – de los programas sociales que se apoyan en la base de datos del mencionado sistema.”*

La Corte consideró que *“el SISBEN, como instrumento fundamental de la efectividad de los derechos prestacionales, constituye una institución que, con el concurso de las autoridades administrativas competentes, debe ser objeto de un amplio debate democrático y, por ende, su regulación es un asunto que compete, en primera instancia, al legislador. De la misma manera, la protección general del derecho al habeas data en los procesos de recolección de datos personales, debe ser objeto de regulación legal. || Sin embargo, mientras el legislador define el sistema de protección de los derechos que se derivan de la autodeterminación informática, se ordenará al Departamento Nacional de Planeación que diseñe un instructivo nacional para que la conformación de la base de datos del SISBEN en cada municipio, así como su operación, consulta y actualización, se someta a los principios básicos de protección al habeas data contenidos en el artículo 15 de la Constitución Política.”*

En conclusión, puede afirmarse que cuando se obstaculiza a una persona el acceso al servicio de salud que requiere, por fallas en la información, se viola su derecho a la salud. Esta violación puede implicar, según sea el caso, una desprotección o un irrespeto al derecho. Así por ejemplo, el Estado deja de proteger el derecho a la salud cuando no ha expedido una regulación adecuada para implementar el programa que determina el derecho a entrar al régimen

subsidiado, como fue analizado, y una EPS irrespetó el derecho a la salud de una persona cuando se le impide acceder a un servicio de salud por fallas graves en el manejo y registro de la información que se tiene, como ocurre en la sentencia T-277 de 2004.

4.2.6. Finalmente, cabe señalar que uno de los principios del servicio público en salud es el de la ‘libre escogencia’ (art. 153, Ley 100 de 1993), en virtud del cual, el ‘*Sistema General de Seguridad Social en Salud permitirá la participación de diferentes entidades que ofrezcan la administración y la prestación de los servicios de salud, bajo las regulaciones y vigilancia del Estado y asegurará a los usuarios libertad en la escogencia entre las Entidades Promotoras de Salud y las Instituciones Prestadoras de Servicios de Salud, cuando ello sea posible según las condiciones de oferta de servicios*’. Advierte además la ley que quienes atenten contra este mandato se harán acreedores a las sanciones previstas en el artículo 230 de la Ley 100 de 1993. La libertad de escogencia es pues, fundamental en el Sistema de Salud vigente, por cuanto permite a las personas desvincularse de aquellas entidades que no garantizan adecuadamente el goce efectivo de su derecho a la salud, a la vez que les permiten afiliarse a aquellas que demuestren que están prestando los servicios de salud con idoneidad, oportunidad y calidad.

La libertad de escogencia en el ámbito de la salud incluso al legislador en sus decisiones sobre la estructura del sistema de salud. Por eso, recientemente la Corte condicionó la exequibilidad de una norma que establecía un tope a la integración vertical a que la implementación del mismo respetara la libertad de los usuarios de escoger la EPS de su preferencia así como el médico con el cual se sienta más seguro.

La libertad para escoger una nueva entidad encargada de garantizar la prestación de los servicios de salud, una vez la persona ya esté afiliada, supone un traslado entre entidades, el cual es permitido una vez transcurra un período de tiempo. Sin embargo, este período es de 12 meses para todas las personas, salvo que se trate de un afiliado que padece una enfermedad de alto costo, en cuyo caso el período será del doble, de 24 meses (numeral 9° del artículo 14 del Decreto 1485 de 1994). Esta disposición, cuya razonabilidad fue estudiada por el Consejo de Estado, sería desproporcionada “*si se obligara a una persona a permanecer en una entidad que dejó de garantizarle el tratamiento que requiere, o dejó de garantizarlo adecuadamente. Si ello ocurriera no se estaría limitando a la persona su derecho a escoger libremente cuál quiere que sea su EPS o su ARS en pro de la eficiencia y sostenibilidad del Sistema, se estaría sacrificando su salud y muy probablemente su vida. Como la norma en cuestión del Decreto 1485 de 1994 contempla expresamente este caso como una excepción para la limitación a la libertad de escogencia, el Consejo de Estado la encontró ajustada a la Constitución Política.*” Específicamente, a propósito de las personas con VIH/Sida, la Corte decidió que *en virtud de los derechos a la igualdad, a la vida y a la salud, una persona con VIH-SIDA tiene derecho a que una EPS o ARS acepte su solicitud de traslado, cuando el motivo del mismo es que la entidad*

*en la que se encuentra afiliado le presta un mal servicio médico. La EPS o ARS que lo reciba podrá aplicar las regulaciones vigentes para obtener la cofinanciación del tratamiento de alto costo.”*

#### **4.3. Conocimiento de la información adecuada y necesaria para acceder a los servicios de salud con libertad y autonomía**

4.3.1. Las entidades del Sistema de Salud tienen la obligación de brindar a las personas la información que sea necesaria para poder acceder a los servicios de salud que requieran, con libertad y autonomía, permitiendo que la persona elija la opción que le garantice en mayor medida su derecho.

4.3.2. Las EPS tienen el deber de brindar a las personas la información que sea necesaria para que puedan saber cuál es el servicio de salud que requieren, cuáles son las probabilidades de éxito y de riesgo que representa el tratamiento, así como también, cómo acceder a los servicios de salud que requieren. La jurisprudencia ha señalado que una EPS no desconoce el derecho a la salud cuando, a través de su médico tratante, le ha brindado al paciente información simple, aproximativa, inteligible y leal sobre los riesgos que conlleva una cirugía que se le debe practicar. El deber de informar y orientar al paciente sobre los tratamientos a seguir y las entidades encargadas de prestarlos, se predica también de las IPS.

4.3.3. La información que deben dar a las personas los diferentes actores dentro del sistema de salud (los empleadores, la Superintendencia de Salud, las Entidades Promotoras de Salud, EPS, las Instituciones Prestadoras de Salud, IPS, y las entidades territoriales responsables), debe ser entregada antes del momento de la afiliación. En efecto, para que una persona pueda ejercer su libertad de afiliación (art. 153, Ley 100 de 1993), ha de contar con los datos suficientes que le permitan conocer (i) cuáles son las opciones de afiliación con las que cuenta, y (ii) el desempeño de cada una de estas instituciones, en función del respeto al goce efectivo del derecho a la salud. Legalmente corresponde al Ministerio del sector, producir información que se fije especialmente en el acceso a los servicios de salud en condiciones de oportunidad, calidad y eficiencia; información orientada a la evaluación y corrección de la prestación de los servicios de salud a los usuarios. En el caso de las personas que tienen contrato de trabajo, los empleadores, *‘como integrantes del Sistema General de Seguridad Social en Salud, (...) cualquiera que sea la entidad o institución en nombre de la cual vinculen a los trabajadores, deberán: informar a los trabajadores sobre las garantías y las obligaciones que les asisten en el Sistema General de Seguridad Social en Salud.’* (art.161, num. 3, Ley 100 de 1993). La Ley 1122 de 2007, en el mismo sentido, señala que el Sistema de Inspección Vigilancia y Control, debe *‘vigilar que los actores del Sistema garanticen la producción de los datos con calidad, cobertura, pertinencia, oportunidad, fluidez y transparencia.’*

4.3.4. Las EPS en el contexto del régimen subsidiado, tienen la obligación de brindar la información y el acompañamiento necesario a las personas, incluso

cuando se trata de servicios de salud que estas requieran y la entidad no esté obligada a garantizar. En el régimen subsidiado la jurisprudencia ha indicado que en “*los casos en los cuales se demanda la atención en salud a una [EPS subsidiada] que alega no tener la obligación de suministrar tratamientos excluidos del POS-S, surgen dos opciones de protección constitucional que deben ser aplicadas por el juez de tutela de acuerdo al caso concreto. La primera supone que la ARS garantice directamente la prestación del servicio, solución excepcional que se da en razón a que se trata de un menor o de un sujeto de especial protección constitucional; la segunda de las opciones, la regla general, supone un deber de acompañamiento e información, pues en principio la prestación corresponde al Estado.*” Esta solución, consiste en reconocer que cuando a una persona afiliada al régimen subsidiado se le niega un servicio por no tener que garantizarlo directamente, la EPS subsidiada – antes, ARS–, junto con las autoridades administrativas del sector salud, tienen los deberes de *informar* e *indicar* a las personas cómo acceder, efectivamente, al tratamiento requerido, y el deber de *acompañarlo* en el trámite para reclamar dicho servicio de salud. La jurisprudencia ha indicado que cuando se trata de una situación especialmente urgente, la persona tiene derecho a ser atendida de manera prioritaria y a que se le practique el tratamiento a la mayor brevedad posible. Esta decisión ha sido reiterada en varias ocasiones.

4.3.5. Como se dijo, la libertad de escogencia es fundamental en el Sistema de Salud vigente, por cuanto permite a las personas desvincularse de aquellas entidades que no garantizan adecuadamente el goce efectivo de su derecho a la salud, a la vez que le permiten afiliarse a aquellas que demuestren que están prestando los servicios de salud con idoneidad, oportunidad y calidad (*ver apartado 4.2.6.*). Sin embargo, para que la libertad de escogencia de las entidades de salud por parte de las personas tenga el efecto de promover las buenas entidades y desincentivar a las malas, es preciso que la información sobre las mismas exista y pueda ser conocida por las personas en el momento de escoger la entidad en cuestión. Esta cuestión, así como las medidas que se requieren para asegurar la existencia de información, clara, completa, actual y pública será tratada posteriormente (*ver sección 6.3.*).

#### **4.4. Derecho a que las entidades responsables garanticen el acceso a los servicios de salud con calidad, eficacia y oportunidad**

La garantía constitucional de toda persona a acceder a los servicios de promoción, protección y recuperación de la salud, contemplada dentro del derecho a la salud (art. 49, CP), ha sido desarrollada por la jurisprudencia constitucional, haciendo énfasis en las condiciones de calidad, eficacia y oportunidad con que las que los servicios deben ser prestados. A continuación se indicará la jurisprudencia constitucional aplicable al respecto, con el objeto de establecer cuáles son los mínimos servicios de salud a los que una persona tiene derecho constitucional a acceder, y por tanto tutelables, así como las condiciones en que los mismos han de ser prestados. Para ello, la Sala hará especial énfasis en los algunos aspectos.

En primer lugar, se indicará que el ámbito de protección constitucional en el acceso a los servicios de salud, son aquellos que la persona requiere, según el médico tratante, sin que ello signifique que el derecho a la salud sea absoluto, ilimitado e infinito en el tipo de prestaciones cobijadas (4.4.1.). En segundo lugar, se indicará que el principal criterio para determinar cuáles son estos mínimos servicios de salud a los que una persona tiene derecho a acceder, es el concepto científico del médico tratante, aunque no de forma exclusiva, pues hay algunos casos en los que es prescindible o puede ser controvertido (4.4.2.). En tercer lugar, se enfatizará que la garantía constitucional de acceso a los servicios de salud que una persona requiera, no puede ser obstaculizada por el hecho de que el servicio no esté incluido dentro de un plan obligatorio de salud; incluso en aquellos casos en los cuales la persona no pueda asumir los costos que le corresponda asumir. En esta parte se hará especial énfasis en los procedimientos establecidos a través del Comité Técnico Científico para que la entidad encargada autorice a una persona la prestación de un servicio de salud que requiera, teniendo en cuenta si carece o no de la capacidad de cubrir con el aporte que le correspondería en tal caso (4.4.3.). En cuarto lugar, se indicará cómo se solucionan los conflictos entre el médico tratante y el Comité Técnico Científico cuando existen discrepancias en cuanto a si una persona requiere o no un servicio de salud que no se encuentre contemplado dentro de los planes obligatorios de salud, con el fin de establecer si tiene derecho constitucional a que se garantice su acceso (4.4.4.). En quinto lugar, se advierte que el Sistema de Salud prevé en ocasiones pagos moderadores a cargo de las personas que van a acceder a un determinado servicio de salud; éstos deben ser razonables y no pueden constituir barreras de acceso a los servicios de salud que se requieran, para quienes no tienen la capacidad económica de sufragarlos (4.4.5.). Finalmente, en sexto lugar, se reiterará, específicamente, que el acceso a los servicios de salud debe garantizarse en condiciones de oportunidad, continuidad, eficiencia y calidad, y de acuerdo con el principio de integralidad (4.4.7.).

#### **4.4.1. *El derecho a acceder a los servicios que se ‘requieran’.***

Toda persona tiene el derecho constitucional a que se le garantice el acceso efectivo a los servicios que *requiera*, esto es, servicios indispensables para conservar su salud, cuando se encuentre comprometida gravemente su vida, su integridad personal, o su dignidad. El orden constitucional vigente garantiza a toda persona, por lo menos, el acceso a los servicios de salud de los cuáles depende su mínimo vital y su dignidad como persona. La forma en que se garantiza su acceso al servicio de salud, depende de la manera en que la persona se encuentre vinculada al Sistema de Salud.

El legislador ha establecido de forma categórica que *‘las Entidades Promotoras de Salud –EPS– en cada régimen son las responsables de cumplir con las funciones indelegables del aseguramiento’* (artículo 14, Ley 1122 de 2007). De acuerdo con la propia legislación, el *‘aseguramiento en salud’* comprende (i) la administración del riesgo financiero, (ii) la gestión del riesgo en salud, (iii) la articulación de los servicios que garantice el acceso efectivo,

(iv) la garantía de la calidad en la prestación de los servicios de salud y (v) la representación del afiliado ante el prestador y los demás actores sin perjuicio de la autonomía del usuario. Así, por ejemplo, si un empleador no paga los aportes en salud de uno de sus empleados, eso no exime a la EPS de garantizar la prestación de los servicios de salud que requiere, sino que autoriza a la entidad a repetir contra el empleador, por el costo de aquellos servicios que no le corresponda asumir. La Corte Constitucional ha reconocido “*varias alternativas para solucionar los conflictos planteados por el incumplimiento del empleador en el pago de los aportes correspondientes al sistema de seguridad social en salud. Esas alternativas de protección parten de considerar que el trabajador no tiene por qué sobrellevar las consecuencias del incumplimiento del empleador o de las disputas que surjan entre él y la entidad prestadora del servicio. En cualquier condición, el trabajador tiene derecho a que se atiendan sus demandas de seguridad social en salud.*” A partir de la Ley 1122 de 2007, garantizar la prestación de los servicios de salud que la persona requiera es responsabilidad de las EPS, tanto en el régimen contributivo como en el subsidiado (art. 14, Ley 1122 de 2007).

#### ***4.4.2. El concepto científico del médico tratante es el principal criterio para establecer si se requiere un servicio de salud, pero no es exclusivo.***

En el Sistema de Salud, la persona competente para decidir cuándo alguien *requiere* un servicio de salud es el médico tratante, por estar capacitado para decidir con base en criterios científicos y por ser quien conoce al paciente. La jurisprudencia constitucional ha considerado que el criterio del médico relevante es el de aquel que se encuentra adscrito a la entidad encargada de garantizar la prestación del servicio; por lo que, en principio, el amparo suele ser negado cuando se invoca la tutela sin contar con tal concepto.

No obstante, el concepto de un médico que trata a una persona, puede llegar a obligar a una entidad de salud a la cual no se encuentre adscrito, si la entidad tiene noticia de dicha opinión médica, y no la descartó con base en información científica, teniendo la historia clínica particular de la persona, bien sea porque se valoró inadecuadamente a la persona o porque ni siquiera ha sido sometido a consideración de los especialistas que sí están adscritos a la entidad de salud en cuestión. En tales casos, el concepto médico externo vincula a la EPS, obligándola a confirmarlo, descartarlo o modificarlo, con base en consideraciones de carácter técnico, adoptadas en el contexto del caso concreto. Tales consideraciones pueden ser las que se deriven del concepto de un médico adscrito a la EPS o de la valoración que haga el Comité Técnico Científico, según lo haya determinado cada EPS. La jurisprudencia constitucional ha valorado especialmente el concepto de un médico no adscrito a la entidad encargada de garantizar la prestación del servicio, cuando éste se produce en razón a la ausencia de valoración médica por los profesionales correspondientes, sea cual fuere la razón que dio lugar a la mala prestación del servicio. También ha indicado la jurisprudencia que la orden médica obliga a la entidad, si en el pasado ha valorado y aceptado sus conceptos como ‘médico tratante’, incluso así sean entidades de salud

prepagadas, regidas por contratos privados.

Una interpretación formalista de la jurisprudencia constitucional en materia de acceso a los servicios de salud, por ejemplo, con relación a la exigencia de que el médico que ordene el servicio requerido debe estar adscrito a la entidad, puede convertirse en una barrera al acceso. Por eso, cuando ello ha ocurrido, la jurisprudencia constitucional ha considerado que las órdenes impartidas por profesionales de la salud idóneos, que hacen parte del Sistema, obligan a una entidad de salud cuando ésta ha admitido a dicho profesional como ‘médico tratante’, así no éste adscrito a su red de servicios. En el mismo sentido se ha pronunciado la Corte cuando la EPS no se opuso y guardó silencio cuando tuvo conocimiento del concepto de un médico externo.

La jurisprudencia constitucional ha tutelado el derecho a la salud cuando el servicio se ‘*requiere*’, por ser ordenado por el médico tratante, pero no así cuando el servicio es ‘*útil*’ y el médico sólo lo recomienda sin ser indispensable. En tal evento, por ejemplo, ha fijado un límite al derecho.

Ahora bien, en ocasiones el médico tratante requiere una determinada prueba médica o científica para poder diagnosticar la situación de un paciente. En la medida que la Constitución garantiza a toda persona el acceso a los servicios de salud que *requiera*, toda persona también tiene derecho a acceder a los exámenes y pruebas diagnósticas necesarias para establecer, precisamente, si la persona sufre de alguna afección a su salud que le conlleve requerir un determinado servicio de salud. Esta es, por tanto, una de las barreras más graves que pueden interponer las entidades del Sistema al acceso a los servicios que se requieren, puesto que es el primer paso para enfrentar una afección a la salud. Así pues, no garantizar el acceso al examen diagnóstico, es un *irrespeto* el derecho a la salud.

#### **4.4.3. Acceso a los servicios que se requieran, incluidos y no incluidos dentro de los planes obligatorios.**

Como se dijo, el derecho constitucional a la salud contempla, por lo menos, el derecho a acceder a los servicios de salud que se *requieran* (servicios indispensables para conservar la salud, en especial, aquellos que comprometan la vida digna y la integridad personal). En la actualidad el acceso a los servicios depende, en primer lugar, de si el servicio requerido está incluido en uno de los planes obligatorios de servicios de salud a los cuales la persona tiene derecho. Así pues, dada la regulación actual, los servicios que se requieran pueden ser de dos tipos: aquellos que están incluidos dentro del plan obligatorio de salud (POS) y aquellos que no.

4.4.3.1. De acuerdo con la ley (Ley 100 de 1993) las personas tienen derecho a acceder, en principio, a los servicios de salud contemplados en el plan obligatorio de salud (art, 162). Si las personas están afiliadas al régimen contributivo pueden acceder a todo el plan obligatorio de servicios, pero las personas beneficiarias del régimen subsidiado, temporalmente, sólo pueden

acceder a una parte de los servicios contemplados en el Plan (sobre esta diferencia la Corte se pronunciará posteriormente). Así pues, el acceso a los servicios de salud que se *requieran* y estén contemplados dentro de los planes obligatorios, está garantizado constitucional y legalmente.

En tal sentido, la jurisprudencia constitucional ha señalado que *toda persona tiene derecho a que se le garantice el acceso efectivo a los servicios médicos contemplados dentro de los planes obligatorios de salud*. Así pues, ‘*no brindar los medicamentos previstos en cualquiera de los planes obligatorios de salud, o no permitir la realización de las cirugías amparadas por el plan, constituye una vulneración al derecho fundamental a la salud*.’ La jurisprudencia ha precisado las condiciones en las cuales la vulneración al derecho a acceder a un servicio fundamental a la salud es tutelable, en los siguientes términos: una persona inscrita en el régimen de salud contributivo o subsidiado tiene derecho a reclamar mediante acción de tutela la prestación de un servicio de salud cuando éste (i) está contemplado por el Plan Obligatorio de Salud (POS o POS-S), (ii) fue ordenado por su médico tratante adscrito a la entidad prestadora del servicio de salud correspondiente, (iii) es necesario para conservar su salud, su vida, su dignidad, su integridad, o algún otro derecho fundamental y (iv) fue solicitado previamente a la entidad encargada de prestarle el servicio de salud, la cual o se ha negado o se ha demorado injustificadamente en cumplir su deber. La Corte Constitucional ha concedido el amparo de tutela en casos similares, una vez verificadas las condiciones aquí señaladas. En otras palabras, *toda persona tiene derecho a acceder a los servicios que requiera, contemplados dentro del plan de servicios del régimen que la protege*.

La Corte Constitucional ha considerado constitucional la existencia de dos planes obligatorios de salud con contenidos distintos. El primero de ellos, el POS, con los contenidos que se consideran básicos, y al cual tienen derecho las personas que hacen parte del régimen contributivo. El segundo plan de beneficios es el que se garantiza a las personas que forman parte del régimen subsidiado (POS subsidiado), el cual sólo contempla algunos de los servicios contenidos en el primero. Por esta razón, si bien es constitucional que democráticamente se establezca un trato diferencial en el goce efectivo del derecho a la salud entre aquellos que contribuyen al Sistema de Salud y aquellos que son beneficiarios por solidaridad, en razón a las capacidades financieras y administrativas de la sociedad y del Estado, éste ha de ser temporal. Como se ha reconocido internacionalmente, el derecho a la salud se ‘*desprende de la dignidad inherente de la persona humana*’. No es posible, por lo tanto, aceptar indefinidamente que a las personas que menos recursos tienen en la sociedad sólo se les garantice el acceso a algunos de los servicios de salud que se consideran básicos. La obligación de unificar los planes de servicios de salud del régimen contributivo y subsidiado, surge pues, del deber constitucional de garantizar a toda persona el acceso a los servicios de salud en condiciones de universalidad y equidad (art. 49, CP; art. 2 y 12, PIDESC). De hecho, de acuerdo con el artículo 2° del Pacto Internacional de Derechos Económicos, Sociales y Culturales, Colombia tiene la obligación de ‘*garantizar el ejercicio*’ del derecho a la salud (artículo 12 del Pacto), sin

discriminación alguna, entre otras razones, por motivos de ‘*posición económica*’.

De acuerdo con esta Corporación, “*es deber del Congreso y del Gobierno adoptar todas las medidas económicas, políticas y administrativas para alcanzar en un término breve la cobertura total de los servicios de salud para toda la población colombiana, destinando cada año mayores recursos para hacer efectivo el derecho irrenunciable a la salud, avanzando en forma gradual pero rápida y eficaz para lograr en un tiempo razonable el bienestar social de todos*”. La obligación de unificar los contenidos de los planes de salud a los cuales tienen acceso los ciudadanos es pues, de carácter progresivo. Su cumplimiento no puede ser exigido inmediatamente, pues supone la realización de una serie de acciones complejas en las que intervienen diversos actores. Ahora bien, la progresividad justifica que se avance por partes, de forma gradual, pero no es una excusa para la inacción. Específicamente, con relación a la obligación de garantizar el acceso a los servicios de salud en condiciones de equidad, el carácter progresivo de esta obligación no puede convertirse en una excusa para aceptar, de forma permanente, la existencia de diferencias en el acceso a los servicios de salud que se requieran, ligadas a la capacidad de pago de las personas, esto es, a su ‘*posición económica*’.

No obstante, vale señalar que el acceso a dichos servicios incluidos dentro de los planes de salud es en algunos casos una garantía meramente formal, puesto que en la práctica las personas no tienen acceso al servicio y no gozan efectivamente su derecho a la salud. Así lo ha demostrado la Defensoría del Pueblo en sus estudios sobre la cuestión. En este campo se han dado pues, dos tipos de violaciones al derecho a la salud. Por una parte, las entidades aseguradoras han *irrespetado* en ocasiones el derecho a la salud de las personas, al poner barreras y obstáculos para que estos puedan acceder a los servicios contemplados y financiados. Pero por otra parte, el estado no ha *protegido* el derecho de las personas, pues no ha adoptado las medidas adecuadas y necesarias para evitar que estas entidades lo *irrespeten*. Posteriormente la Sala analizará esta situación (*ver apartado 6.1.4.1.*), y adoptará medidas orientadas a superar esta situación (*ver apartado 6.1.4.2.*). Para la Corte Constitucional, conlleva un irrespeto especialmente grave al derecho a la salud, el no garantizar el acceso a un servicio de salud que se requiere y está incluido dentro del plan obligatorio de salud aplicable, con base en la errada consideración de que dicho servicio no se encuentra incluido dentro del plan, o más grave aún, afirmar que se encuentra excluido del mismo.

Ahora bien, algunos de los servicios contemplados en el plan obligatorio de salud, pueden estar sometidos a *pagos moderadores*, pero en ningún caso estos se pueden convertir en barreras de acceso para las persona que carezcan de recursos. Tales casos, en los que la persona requiere el servicio *con necesidad*, por carecer de los recursos que le correspondería asumir, serán analizados posteriormente (*ver apartado 4.4.5.*).

4.4.3.2. De acuerdo con el orden constitucional vigente, como se indicó, toda persona tiene derecho a que exista un Sistema que le permita acceder a los servicios de salud que *requiera*. Esto sin importar si los mismos se encuentran o no en un plan de salud, o de si la entidad responsable tiene o no los mecanismos para prestar ella misma el servicio requerido. Por lo tanto, si una persona *requiere* un servicio de salud, y el Sistema no cuenta con un medio para lograr dar trámite a esta solicitud, por cualquiera de las razones dichas, la falla en la regulación se constituye en un obstáculo al acceso, y en tal medida, desprotege el derecho a la salud de quien *requiere* el servicio.

4.4.3.2.1. Al principio, la regulación (Ley 100 de 1993) guardó silencio respecto a la forma para acceder a todos aquellos servicios que una persona *requiriera* y que estuvieran por fuera del plan obligatorio de servicios, incluso en el caso de que la persona pudiera morir o que la ausencia del servicio implicara un dolor y un sufrimiento enorme a la persona. Es la regulación, no la ley, la que posteriormente trata de resolver el punto, indicando que las entidades aseguradoras de la prestación de servicios no podían autorizar ningún servicio por fuera de los planes de servicios. De tal forma que, en principio, un servicio de salud que alguien requiriera y no estuviera en el plan, debía ser obtenido por la persona de forma individual, asumiendo el costo del mismo. De tal suerte que en este primer momento, la única forma para poder acceder a un servicio de salud requerido que estaba por fuera del plan obligatorio de salud correspondiente, cuando se carecía de los medios económicos para poder acceder al mismo por cuenta propia, era mediante una acción de tutela. A esta situación, requerir un servicio y no contar con los recursos económicos para poder proveerse por sí mismo el servicio, se le denominará en adelante, *requerir con necesidad* (también ocurre esta situación, por ejemplo, cuando el servicio se encuentra contemplado en el plan obligatorio, pero sometido a un pago moderador que rebasa la capacidad económica del interesado (al respecto, *ver apartado 4.4.5.*)

Desde el inicio, la jurisprudencia constitucional fue depurando las condiciones en las cuales una persona tenía derecho a que se le tutelara su derecho a acceder al servicio de salud que requería y no le era autorizado por la entidad encargada de asegurar la prestación. Fundándose en la conexidad que existe entre el derecho a la salud y otros derechos fundamentales como el derecho a la vida o a la integridad personal, se tuteló el acceso tanto a servicios incluidos en los planes de salud como a servicios no incluidos en dichos planes. De hecho, las primeras sentencias, incluso una vez expedida la Ley 100 de 1993, se produjeron en un contexto en el cual no habían sido definidos los contenidos del plan obligatorio de salud (POS), y era preciso aplicar la regulación existente, anterior a la Constitución de 1991. En el año de 1997 la jurisprudencia constitucional estableció de forma precisa las condiciones en las cuales una persona tiene derecho a acceder a un servicio de salud, no contemplado en los planes obligatorios. En efecto, en la sentencia de unificación de jurisprudencia SU-480 de 1997, la Sala Plena de la Corte reiteró la decisión jurisprudencial según la cual la negativa a entregar servicios no incluidos en el listado oficial, como medicamentos, puede vulnerar el derecho a la vida, y fijó expresamente las condiciones de acceso a servicios no

incluidos en los planes obligatorios.

Así, desde su inicio, la jurisprudencia constitucional consideró que toda persona tiene derecho a que se le garantice el acceso a los servicios que requiera *‘con necesidad’* (que no puede proveerse por sí mismo). En otras palabras, en un estado social de derecho, se le brinda protección constitucional a una persona cuando su salud se encuentra afectada de forma tal que compromete gravemente sus derechos a la vida, a la dignidad o a la integridad personal, y carece de la capacidad económica para acceder por sí misma al servicio de salud que requiere.

4.4.3.2.2. Al finalizar el año 1997, en el mes de diciembre, la administración resolvió ajustar la regulación existente a los mandatos constitucionales vigentes, acogiendo la decisión de garantizar el acceso de algunos servicios de salud no contemplados en el plan obligatorio de salud, con el fin de asegurar el goce efectivo del derecho a la salud y el derecho a la vida a las personas. Expresamente, el primer inciso del artículo 8° del Acuerdo 83 de 1997 del Consejo Nacional de Seguridad en Salud señalaba: *‘para garantizar el derecho a la vida y a la salud de las personas, podrán formularse medicamentos no incluidos en el manual de que trata el presente Acuerdo’*. La misma norma, en su último inciso, resolvió dar la competencia para tomar estas decisiones a los Comités Técnicos Científicos que se deberían crear en todas las entidades de salud. Los Comités Técnicos Científicos habían sido contemplados por la Ley 100 de 1993 (art. 188) para resolver, en primera instancia, las reclamaciones acerca de *‘hechos de naturaleza asistencial que presuntamente afecten al afiliado respecto de la adecuada prestación de los servicios del Sistema General de Seguridad Social en Salud’*, en especial cualquier tipo de discriminación. Ahora se les daba a los Comités la competencia para garantizar el acceso a servicios de salud no contemplados en plan obligatorio de salud, pero sólo en el caso de los medicamentos “no incluidos” en el manual oficialmente adoptado.

La regulación sobre el Comité Técnico Científico en toda entidad encargada de garantizar la prestación de servicios de salud, sus competencias y el procedimiento a seguir para autorizar el suministro de medicamentos no incluidos en los planes obligatorios de salud, ha sido modificada en varias ocasiones desde que fue expedida, manteniendo a lo largo del tiempo, sus lineamientos generales. En la actualidad, autorizar medicamentos no incluidos en el Plan Obligatorio de servicios sigue siendo una de las principales funciones que otorga la regulación al Comité Técnico Científico.

Ahora bien, con relación a todos aquellos servicios de salud que una persona requiriera, distintos a medicamentos no incluidos en el plan obligatorio de salud, la regulación ha guardado silencio hasta el día de hoy. Existe una *laguna* normativa con relación a cuál es el procedimiento que garantiza a una persona el acceso a tales servicios. Así pues, actualmente las personas tienen que recurrir a la acción de tutela para acceder a los servicios de salud que requieran y no estén incluidos en el POS. La única norma legal que se había

establecido con miras a resolver el asunto ya no hace parte del ordenamiento. En efecto, en el año 2000 se estableció expresamente el derecho excepcional a acceder a los servicios no incluidos en el plan obligatorio de salud, *‘cuando estaba de por medio el derecho a la vida’*. La norma devino inconstitucional porque era parte de un Decreto Extraordinario que se fundó en una ley de facultades que fue declarada inconstitucional.

Con el tiempo, la jurisprudencia constitucional fue precisando los criterios de aplicación la regla de acceso a los servicios de salud que se requerían y no estaban incluidos en los planes obligatorios de salud. Actualmente, la jurisprudencia reitera que se desconoce el derecho a la salud de una persona que requiere un servicio médico no incluido en el plan obligatorio de salud, cuando “(i) *la falta del servicio médico vulnera o amenaza los derechos a la vida y a la integridad personal de quien lo requiere*; (ii) *el servicio no puede ser sustituido por otro que se encuentre incluido en el plan obligatorio*; (iii) *el interesado no puede directamente costearlo, ni las sumas que la entidad encargada de garantizar la prestación del servicio se encuentra autorizada legalmente a cobrar, y no puede acceder al servicio por otro plan distinto que lo beneficie*; y (iv) *el servicio médico ha sido ordenado por un médico adscrito a la entidad encargada de garantizar la prestación del servicio a quien está solicitándolo*.” En adelante, para simplificar, se dirá que una entidad de salud viola el derecho si se niega a autorizar un servicio que no esté incluido en el plan obligatorio de salud, cuando el servicio se *requiera* [que reúna las condiciones (i), (ii) y (iv)] *con necesidad* [condición (iii)]. Como lo mencionó esta Corporación, “(...) *esta decisión ha sido reiterada por la jurisprudencia constitucional en varias ocasiones, tanto en el contexto del régimen contributivo de salud, como en el régimen subsidiado, indicando, no obstante, que existen casos en los cuales se deben tener en cuenta consideraciones especiales, en razón al sujeto que reclama la protección, a la enfermedad que padece la persona o al tipo de servicio que ésta requiere*.”

4.4.3.2.3. Existe pues, una división entre los servicios de salud que se *requieren* y estén por fuera del plan de servicios: medicamentos no incluidos, por una parte, y todos los demás, procedimientos, actividades e intervenciones, por otra parte. En el primer caso, existe un procedimiento para acceder al servicio (solicitud del médico tratante al Comité Técnico Científico), en tanto que en el segundo caso no; el único camino hasta antes de la presente sentencia ha sido la acción de tutela.

Con relación al primer caso, es claro entonces que el sistema de salud ofrece dos clases de medicamentos, aquellos que están en el plan obligatorio de salud y aquellos que, requiriéndose y no estando incluidos, son aprobados por el Comité Técnico Científico. Por esto, el Consejo de Estado ha considerado que no incluir dentro del plan obligatorio de salud un medicamento necesario para atender una enfermedad catastrófica (SIDA), no amenaza al derecho colectivo al acceso a una infraestructura de servicios que garantice la salubridad pública, porque “*la no inclusión de medicamentos no impide a las personas acceder a éstos, cuando por prescripción médica sea necesario su consumo*.”

La *laguna* normativa que existe en torno al procedimiento para acceder a los servicios de salud que se *requieran*, no comprendidos dentro del plan, distintos a medicamentos no incluidos, es la principal barrera que existe para poder obtenerlos. Esta falla en la regulación es una desprotección del derecho a la salud que se ha mantenido a lo largo de las diferentes reformas. El Ministerio de la Protección Social reconoce en una de sus intervenciones que la decisión de restringir el acceso a los servicios de salud que una persona requiera, distintos de medicamentos, es deliberada y consciente, por cuanto se considera, erradamente, que en tal situación el plan de salud sería ilimitado y podría incluir cualquier clase de servicio. Esta creencia es errada, pues el hecho de que excepcionalmente en un caso concreto una persona requiera un servicio de salud no incluido en el POS, y se le garantice el acceso al mismo, no tiene como efecto modificar el POS e incluir tal servicio. El servicio no incluido al que se haya garantizado el acceso en un caso concreto, permanece como un servicio no incluido dentro del Plan y sólo podrá ser autorizado, excepcionalmente, por las condiciones específicas en que se encuentra el paciente, sin perjuicio de que la experiencia y los estudios lleven a que el órgano regulador decida incluir dicho servicio en el plan de beneficios. Esta laguna normativa, barrera al acceso a los servicios de salud, será analizada posteriormente en términos generales, con el fin de adoptar las órdenes necesarias para evitar que continúe la desprotección del derecho (*ver sección 6.1.3.*).

4.4.3.3. Dentro de los servicios de salud que el Sistema contempla como obligatorios, especial importancia tienen los servicios de promoción de la salud. En primer lugar, este tipo de servicios garantizan un nivel más alto de salud de una persona, por cuanto buscan evitar o reducir las posibilidades de que sufra un determinado padecimiento en su salud. Así se asegura un mayor goce efectivo del derecho que si sólo se garantiza a la persona el acceso al servicio de salud curativo, una vez sufra el padecimiento que hubiese podido prevenir. En segundo lugar, la prevención de los quebrantamientos de salud que pueda sufrir una persona suele llevarse a cabo mediante servicios que cuestan considerablemente menos que los servicios de salud que se requieren para atender los quebrantamientos una vez estos aparecen. Esto es especialmente relevante en el caso de enfermedades de alto costo, como el VIH/SIDA, cuyo tratamiento es notoriamente más oneroso, tanto para el goce efectivo del derecho de la persona que padece la enfermedad como en términos financieros. Los servicios de salud que se requieren aseguran a las personas no perder la vida, su dignidad o su integridad. He ahí su importancia. Pero son los servicios de prevención en salud los que asegurarán el pleno goce efectivo del derecho a la salud.

4.4.3.4. En conclusión, toda persona tiene el derecho a que se le garantice el acceso a los servicios de salud que *requiera*. Cuando el servicio que *requiera* no está incluido en el plan obligatorio de salud correspondiente, debe asumir, en principio, un costo adicional por el servicio que se recibirá. No obstante, como se indicó, la jurisprudencia constitucional ha considerado que sí carece

de la capacidad económica para asumir el costo que le corresponde, ante la constatación de esa situación de penuria, es posible autorizar el servicio médico requerido con necesidad y permitir que la EPS obtenga ante el Fosyga el reembolso del servicio no cubierto por el POS.

#### **4.4.4. Regla para solucionar conflictos entre el médico tratante y el Comité Técnico Científico.**

4.4.4.1. Como se dijo antes (*ver apartado 4.4.3.2.3.*), existe un vacío en la regulación, por cuanto si el servicio de salud es distinto a un medicamento, el Comité Técnico Científico, no tiene competencia para autorizar el servicio, y por tanto, la entidad promotora tampoco. En estos casos, el medio de defensa con el que cuenta toda persona para que se le garantice su derecho a acceder a un servicio de salud que requiere, y el cual no está contemplado en el plan de servicios, es recurrir a la protección del juez constitucional, mediante una acción de tutela.

4.4.4.2. Ahora bien, también existe una laguna en la regulación, respecto de las reglas para solucionar los conflictos entre el médico tratante y el Comité Técnico Científico, en torno a si una persona requiere o no un servicio de salud no incluido dentro del POS. En el año 2002, luego de constatar que existía una laguna normativa en torno a la cuestión, y que la misma representaba un obstáculo al goce efectivo del derecho a la salud, la Corte Constitucional decidió que *“mientras no se establezca un procedimiento expedito para resolver con base en criterios claros los conflictos entre el médico tratante y el Comité Técnico Científico de una EPS, la decisión de un médico tratante de ordenar una droga excluida del POS, por considerarla necesaria para salvaguardar los derechos de un paciente, prevalece y debe ser respetada, salvo que el Comité Técnico Científico, basado en (i) conceptos médicos de especialistas en el campo en cuestión, y (ii) en un conocimiento completo y suficiente del caso específico bajo discusión, considere lo contrario.”* En caso de que existan tratamientos sustitutos dentro del Plan Obligatorio de Salud para tratar la enfermedad que la persona padece, y el médico tratante insista, sin embargo, en que se autorice el suministro de un servicio no incluido dentro del plan obligatorio de salud, la aplicación de la regla anterior, asegurará que el concepto del médico tratante no se desconozca, salvo que existan razones médicas para ello.

4.4.4.3. Teniendo en cuenta que de acuerdo a la regulación, corresponde al médico tratante solicitar al Comité Técnico Científico, la autorización de los servicios de salud no incluidos dentro del plan obligatorio de salud respectivo es decir, la realización de un trámite al interior al Sistema de Salud, la jurisprudencia constitucional considera que una EPS viola el derecho a la salud de una persona, cuando se le niega el acceso al servicio con base en el argumento de que la persona no ha presentado la solicitud al Comité. Para la Corte *‘las EPS no pueden imponer como requisito de acceso a un servicio de salud el cumplimiento de cargas administrativas propias de la entidad’*. En tal sentido, cuando una EPS niega servicios de salud a una persona que tiene

derecho a ellos, porque no realizó un trámite que le corresponde realizar a la propia entidad, *irrespetando* su derecho a la salud, puesto que crea una barrera para acceder al servicio. Dentro del presente proceso la Defensoría manifestó que este es un obstáculo del cual se quejan frecuentemente los usuarios.

4.4.4.4. Recientemente, el legislador reiteró la competencia del Comité Técnico Científico para considerar medicamentos no incluidos en el plan de beneficios del régimen contributivo, en aquellos casos de enfermedad de alto costo, advirtiendo que *‘si la EPS no estudia oportunamente tales solicitudes ni las tramita ante el respectivo Comité y se obliga a la prestación de los mismos mediante acción de tutela, los costos serán cubiertos por partes iguales entre las EPS y el Fosyga’* (art. 14, lit. j, Ley 1122 de 2007). Teniendo en cuenta que el derecho a la salud de toda persona es fundamental y que dentro de éste se contemplan la garantía de poder acceder a los servicios de salud que se requieran, en especial, con necesidad, la Corte Constitucional decidió declarar exequible la norma acusada, *“en el entendido de que la regla sobre el reembolso de la mitad de los costos no cubiertos, también se aplica, siempre que una EPS sea obligada mediante acción de tutela a suministrar medicamentos y demás servicios médicos o prestaciones de salud prescritos por el médico tratante, no incluidos en el plan de beneficios de cualquiera de los regímenes legalmente vigentes.”* Esta regla de recobro parcial se constituye pues, en una medida que estimula a las entidades encargadas de asegurar la prestación de los servicios de salud a que tramiten adecuadamente las solicitudes de servicios de salud no incluidos en el plan obligatorio de servicios, y las desestimula a que esperen a ser eventualmente demandadas, puesto que en tal caso le implicaría asumir parte del costo del servicio no cubierto por la UPC.

4.4.4.5. Ahora bien, como el derecho a la salud no es ilimitado, el Comité Técnico Científico no está obligado a autorizar de manera automática cada solicitud del médico tratante. De tal forma que si la solicitud alude a un tratamiento estético, a un asunto dental, o a otro de aquellos que la Corte ha admitido que están razonablemente excluidos del POS (*ver sección 3.5.*), el correspondiente Comité Técnico Científico podrá invocar la jurisprudencia constitucional para negar la solicitud y el juez de tutela habrá de hacer lo propio respetando los precedentes constitucionales.

**4.4.5. Los pagos, además de ser razonables, no pueden constituir barreras de acceso a los servicios de salud para quienes no tienen la capacidad económica de sufragarlos.**

Toda persona tiene derecho a acceder a un servicio de salud que *requiere* (i) cuando se encuentra contemplado en el Plan Obligatorio de Salud, o (ii) cuando *requiere* el servicio *con necesidad*, es decir, cuando éste se encuentra sometido a un pago que la persona no está en capacidad de asumir. Esto ocurre, por ejemplo, cuando una persona tiene que asumir un *‘pago moderador’* (copago, cuota moderadora) o cuando el servicio *requerido* no se encuentra incluido en el Plan Obligatorio y la persona, o de quien ella

depende, carece de la capacidad económica —parcial o total, temporal o definitiva— para asumir el costo que le corresponde. Como se dijo toda persona tiene derecho a que se le garantice el acceso a los servicios que requiera ‘*con necesidad*’ —que no puede financiarse por sí mismo— (ver apartado 4.4.3.).

4.4.5.1. *Los pagos moderadores no pueden constituir barreras al acceso a los servicios de salud.*

4.4.5.1.1. Toda persona tiene el derecho constitucional a no ser excluida del acceso a los servicios de salud, por lo que no se le puede condicionar la prestación de los mismos al pago de sumas de dinero cuando carece de la capacidad económica para sufragarlas. La Constitución Política, en el artículo 49, establece que la ‘*atención de la salud*’ es un servicio público a cargo del Estado, que debe garantizar ‘*a todas las personas el acceso a los servicios de promoción, protección y recuperación de la salud*’, ‘*conforme a los principios de eficiencia, universalidad y solidaridad*’.

4.4.5.1.2. En desarrollo de estas disposiciones constitucionales, el legislador estableció que las personas afiliadas y beneficiarias del Sistema General de Seguridad Social en Salud están sujetas a ‘*pagos moderadores*’ entendiendo por tales, ‘*pagos compartidos, cuotas moderadoras y deducibles*’ (artículo 187 de la Ley 100 de 1993). Los ‘*pagos moderadores*’ pueden ser de dos tipos: aquellos dirigidos a ‘*racionalizar*’ los servicios y aquellos dirigidos a ‘*complementar la financiación de los servicios prestados*’. El legislador advierte que en el caso de los afiliados cotizantes, los ‘*pagos moderadores*’ sólo pueden ser aplicados con un ‘*exclusivo objetivo*’, a saber, ‘*racionalizar el uso de servicios del sistema*’; mientras que en el caso de los beneficiarios, tales pagos también se aplicarán con el objetivo de ‘*complementar la financiación del plan obligatorio de salud POS*’.

En el momento de la prestación de los servicios de salud, las instituciones encargadas deben tener en cuenta, siempre, la voluntad expresa y manifiesta del Legislador, de acuerdo con la cual ‘*en ningún caso los pagos moderadores podrán convertirse en barreras de acceso para los más pobres*’. Para la Corte, el no tener capacidad económica no puede convertirse en un obstáculo para obtener el servicio, pues toda persona tiene el derecho a “*acceder al Sistema sin ningún tipo de discriminación*”.

El artículo 187 de la Ley 100 de 1993, fue declarado exequible por la Corte en la sentencia C-542 de 1998 —salvo la expresión ‘*y la antigüedad de afiliación en el Sistema*’—. No obstante, la constitucionalidad fue condicionada, bajo el entendido de que si el usuario del servicio no dispone de los recursos económicos para cancelar los pagos moderadores o controvierte la validez de su exigencia, “*el Sistema y sus funcionarios no le pueden negar la prestación íntegra y adecuada de los servicios médicos, hospitalarios, quirúrgicos, asistenciales y de medicamentos que requiera, sin perjuicio de los cobros posteriores con arreglo a las normas vigentes*”. En cambio, la expresión ‘*y la*

*antigüedad de afiliación en el Sistema*’ contenida en el segundo inciso del artículo 187, se declaró inexecutable. Para la Corte, esta expresión era contraria a la Carta Política, por cuanto “*no guarda relación alguna con el costo y la racionalidad del uso del servicio del sistema de salud.*”

La sentencia C-542 de 1998 se adoptó siguiendo lo decidido meses atrás en la sentencia C-089 de 1998, con ocasión de una acción de inconstitucionalidad dirigida, entre otras normas, contra una disposición legal similar, que regula las ‘*cuotas moderadoras*’ y los ‘*pagos compartidos*’ en el subsistema de las Fuerzas Militares y la Policía Nacional (art. 36, Ley 36, Ley 352 de 1998), que expresamente establece que ‘*estos pagos en ningún caso se podrán constituir en barreras de acceso al servicio*’. La Corte consideró executable el cobro de este tipo de pagos, por cuanto su fin es ‘*racionalizar*’ el uso de los servicios de salud, sin limitar el acceso a éstos, asegurando así una mejor asignación de los recursos y la promoción del principio constitucional de *solidaridad*, al propender que las personas contribuyan con los costos del Sistema, pero ‘*únicamente*’ bajo el entendido y la condición de que “*los pagos compartidos y las cuotas moderadoras (...) no pueden tomarse por la Administración como elementos a los cuales se supedita el acceso a los servicios de salud*”. En otros términos, dice la Corte, “*si el paciente o beneficiario no tiene cómo pagarlos antes de prestado el servicio, o si discute la validez de la exigencia, el Sistema y sus funcionarios no le pueden negar la prestación íntegra y adecuada de los servicios médicos, hospitalarios, quirúrgicos, asistenciales y de medicamentos que requiera, sin perjuicio de los cobros posteriores con arreglo a las normas vigentes.*”

4.4.5.1.3. Con base en la facultad conferida en el artículo 172 de la Ley 100 de 1993, el Consejo Nacional de Seguridad Social en Salud desarrolló el artículo 187 de la misma ley, mediante el Acuerdo 260 de 2004, estableciendo definiciones más precisas de los tipos de ‘*pagos moderadores*’ que pueden existir. En primer lugar, el Acuerdo establece que el objeto de las ‘*cuotas moderadoras*’ es ‘*regular la utilización del servicio de salud y estimular su buen uso*’, de tal suerte que se esté ‘*promoviendo en los afiliados la inscripción en los programas de atención integral desarrollados por las EPS.*’ En segundo lugar, señala que los ‘*copagos*’ son ‘*aportes en dinero que corresponden a una parte del valor del servicio demandado*’ cuya finalidad es ‘*ayudar a financiar el sistema*’. El CNSSS reitera a su vez el mandato legal (art. 187, Ley 100 de 1993) según el cual el primer tipo de pagos moderadores –cuotas moderadoras– son para afiliados y beneficiarios, mientras que el segundo tipo –copagos–, son exclusivamente para los beneficiarios.

La regulación indica que los montos de los pagos moderadores deberán definirse con base en ‘*el ingreso base de cotización del afiliado cotizante*’, advirtiendo que si existe más de un cotizante por núcleo familiar, el cálculo se hará con base en ‘*el menor ingreso declarado*’. Adicionalmente, establece que los pagos moderadores (tanto las cuotas moderadoras como los copagos) deben ‘*aplicarse*’ de acuerdo con los principios de (i) equidad, (ii) información al usuario, (iii) aplicación general (de no discriminación), y (iv) de no

simultaneidad.

De forma específica, el Acuerdo fija dos límites a las cuotas moderadoras en mención; establece categóricamente que

*‘en ningún caso podrá exigirse el pago anticipado de la cuota moderadora como condición para la atención en los servicios de urgencias’, y*

*‘si el usuario está inscrito o se somete a las prescripciones regulares de un programa especial de atención integral para patologías específicas, en el cual dicho usuario debe seguir un plan rutinario de actividades de control, no habrá lugar a cobro de cuotas moderadoras en dichos servicios’.*

No podrán someterse a copagos (1) *‘servicios de promoción y prevención’*; (2) *‘programas de control en atención materno infantil’*; (3) *‘programas de control en atención de las enfermedades transmisibles’*; (4) *‘enfermedades catastróficas o de alto costo’*; (5) *‘la atención inicial de urgencias’*; (6) *‘los servicios enunciados en el artículo precedente [artículo 6°]’.*

Los pagos moderadores de los beneficiarios del régimen subsidiado, de acuerdo con la regulación (Acuerdo 260 de 2004, CNSSS), son contribuciones equitativas, dirigidas a contribuir a financiar los servicios recibidos. Expresamente, la regulación establece que los *‘beneficiarios del régimen subsidiado contribuirán a financiar el valor de los servicios de salud que reciban, a través de copagos establecidos según los niveles o categorías fijadas por el Sisbén’*. Además, advierte primero, que no habrá lugar a copagos en los casos *‘de indigencia debidamente verificada y las comunidades indígenas’*; segundo, que el copago máximo para el nivel 1 del Sisbén y la población incluida en listado censal es del 5% del valor de la cuenta, sin que el cobro por un mismo evento exceda de una cuarta parte del salario mínimo legal mensual vigente; y tercero, que el copago máximo para el nivel 2 del Sisbén el del 10% del valor de la cuenta, sin que el cobro por un mismo evento exceda de la mitad de un salario mínimo legal mensual vigente. Finalmente, la regulación señala categóricamente que *‘en el Régimen Subsidiado se prohíbe el cobro de copagos al control prenatal, la atención del parto y sus complicaciones y a la atención del niño durante el primer año de vida’*.

4.4.5.1.4. Con fundamento en estos claros mandatos constitucionales, legales y reglamentarios, los jueces de tutela han impedido que las entidades encargadas de garantizar la prestación de los servicios de salud, discriminen a aquellas personas a las que los *‘pagos moderadores’*, por su precaria situación económica, les representan un obstáculo para acceder a los servicios en el Sistema; en especial, en aquellos casos en los que la vida o la integridad personal se encuentran gravemente comprometidas.

Recientemente, el legislador estableció nuevos parámetros al señalar que *‘no habrá copagos ni cuotas moderadoras para los afiliados del Régimen Subsidiado en Salud clasificados en el nivel I del Sisbén o el instrumento que lo remplace’* (lit, g, art. 14, Ley 1122 de 2007); y que *‘no habrá períodos mínimos de cotización o períodos de carencia superiores a 26 semanas en el Régimen Contributivo’* (lit, g, art. 14, Ley 1122 de 2007); La regla de *‘excluir de los pagos moderadores’*, fue extendida por el regulador a algunas poblaciones especiales tales como la población infantil abandonada, la indigente, la que se encuentra en condiciones de desplazamiento, la indígena, la desmovilizada, la de personas de la tercera edad y la población rural migratoria o ROM, asimilable al nivel I del Sisbén (art, 1°, Acuerdo 365 del Consejo Nacional de Seguridad en Salud). Se recomienda además que este derecho a no tener *‘pagos moderadores’* se encuentre expresamente consignado en el carné del beneficiario.

4.4.5.1.5. Las EPS y las entidades territoriales que obstaculizan el acceso a los servicios de salud a una persona que carece de recursos económicos, *irrespetan* su derecho constitucional a acceder a los servicios de salud sin discriminación y, además, actúan en contra de la ley, puesto que la constitucionalidad de la norma legal invocada fue condicionada, precisamente, a que el pago no se constituya en una barrera a la accesibilidad al servicio de salud para los que carecen de recursos económicos (art. 187, Ley 100; sentencia C-542 de 1998). Esta regla también ha sido aplicada en el contexto del régimen subsidiado, en el que las personas, por su condición de beneficiarios, suelen estar sometidos a copagos, para colaborar en la financiación de los servicios que reciben, y así promover la sostenibilidad del Sistema. Se ha garantizado el acceso, por ejemplo, a servicios tales como oxígeno domiciliario permanente. De forma similar, se ha protegido el derecho a acceder a los servicios de salud necesarios, cuando los pagos moderadores se convierten en un obstáculo a los más pobres. Así, por ejemplo, se ha garantizado el acceso a medicamentos que se requieren.

Ha advertido la Corte que la violación del derecho de toda persona a que se le garantice el acceso a los servicios de salud sin discriminación, como consecuencia de que se le condiciona la prestación de los mismos a un pago moderador que no tiene la capacidad de realizar, ha implicado en ocasiones incluso la muerte del paciente.

4.4.5.1.6. Cuando los servicios están sometidos al pago de cuotas de recuperación, y la persona no puede asumir el costo, es obligación del ente territorial respectivo garantizar el acceso al servicio requerido, asumiendo la totalidad del costo del mismo. En tales casos, la Corte Constitucional ha resuelto inaplicar las disposiciones de carácter reglamentario, en las cuales se funda el cobro de las cuotas de recuperación (nombre de algunos pagos moderadores en el régimen subsidiado).

4.4.5.1.7. Uno de los principales motivos por el que las personas afiliadas o beneficiarias del régimen contributivo se ven obligadas a realizar pagos en el

contexto del servicio de salud, es por requerir el tratamiento de *‘enfermedades de alto costo’* que estén sujetas a un *‘período mínimo de cotización’*. La ley 100 de 1993, luego de aclarar que en el Sistema de Seguridad Social en Salud las EPS no pueden *‘aplicar preexistencias’*, establece que el acceso a la prestación de algunos servicios de salud de *‘alto costo’* para quienes se afilien al sistema, *‘podrá’* estar sujeto a períodos mínimos de cotización. Cuando una persona no cumpla con los períodos mínimos de cotización, el acceso a dichos servicios requerirá un pago por parte del usuario, que se establecerá de acuerdo con la *‘capacidad socioeconómica’* de la persona. Esta regla se reproduce en los mismos términos en la reglamentación, aunque en ella se añade un criterio de justicia adicional para determinar el monto del pago por no haber cotizado el período mínimo, a saber, el porcentaje de tiempo que falte cotizar.

4.4.5.1.8. En la sentencia C-112 de 1998 se estudió la constitucionalidad del artículo 164 de la Ley 100 de 1993. Para la Corte una norma legal viola *‘los derechos a la salud y a la vida de los afiliados al Plan Obligatorio de Salud’* si impide el acceso a la atención médica en caso de que se presentaran enfermedades cuyo tratamiento fuera catalogado como de *‘alto costo’*, por no cumplir con los requisitos de períodos mínimos de cotización *‘aún en situaciones de urgencia y gravedad’*. La Corte consideró que el artículo 164 de la Ley 100 de 1993 es constitucional, precisamente porque no dice esto, ni es ese su efecto. Con base en una lectura sistemática de la Ley, la Corte Constitucional concluyó que la persona que no ha cumplido el período mínimo de cotización no está excluida del acceso al servicio de salud requerido, puesto que el hecho de que el legislador establezca un pago para compensar las cotizaciones aún no efectuadas, según la capacidad socioeconómica de la persona, no impide acceder al servicio y, en todo caso, ante una situación de *‘urgencia no es posible oponer períodos mínimos de cotización’*. Para la Corte, “(...) ante situaciones de urgencia no es posible oponer períodos mínimos de cotización pues su exigencia violaría los derechos a la salud y a la vida de las personas que, padeciendo de una enfermedad que requiere tratamiento de *‘alto costo’*, necesiten de atención médica y hospitalaria en forma inmediata. Los períodos de espera en esas situaciones constituyen un riesgo para la salud y ponen en peligro la vida de los usuarios.” Para la Corte, el inciso segundo del artículo no vulnera *‘norma constitucional alguna’* porque “(...) los períodos mínimos de cotización no excluyen la atención de las enfermedades de alto costo; simplemente difieren su atención al momento en que el afiliado cumpla con un número determinado de semanas de cotización que no puede exceder de 100, o pague ciertos emolumentos de acuerdo con su capacidad económica, en los casos en que el número de semanas de cotización sea inferior al fijado. En consecuencia, si el usuario desea ser atendido antes de cumplirse esos plazos, debe pagar un valor por esos servicios de acuerdo con su capacidad económica y según las tarifas fijadas por la ley. En los casos de urgencias no se pueden oponer períodos mínimos de cotización, pues su exigencia podría vulnerar los derechos a la salud y a la vida de los usuarios.” La jurisprudencia ha reiterado en múltiples ocasiones esta decisión, en especial, cuando de los servicios ordenados depende la vida o la integridad personal.

4.4.5.1.9. De manera expresa, la jurisprudencia ha considerado que está constitucionalmente prohibido aplicar pagos moderadores a los servicios que requiere una niña o un niño cuyos acudientes no cuenten con los recursos para cubrir esos gastos. En esta ocasión dijo al respecto la Corte,

*“(…) cuando una persona se encuentra en condiciones de pobreza, y requiera de un tratamiento o procedimiento médico que le proteja su derecho a la vida en condiciones de dignidad, no se podrá interponer obstáculos de carácter económico, debido a su imposibilidad económica para la no realización de dichos procedimientos.*

*Lo anterior adquiere mayor importancia, como se verá en concreto frente a las circunstancias del caso revisado si el afectado con la decisión de la entidad prestadora de servicios de salud es un menor de edad, pues para su caso, el derecho a la salud es de naturaleza fundamental y, por tanto, es procedente su protección a través del amparo constitucional no sólo en los eventos en que se afecten de forma grave los derechos a la vida y a la integridad física, sino también cuando se compruebe que, a raíz de la falta de atención médica, se impide el mantenimiento de adecuadas condiciones biológicas o psíquicas del niño.”*

4.4.5.1.10. En conclusión, una entidad encargada de garantizar la prestación de los servicios de salud a una persona, *irrespet*a su derecho a acceder a éstos, si le exige como condición previa que cancele el pago moderador al que haya lugar en virtud de la reglamentación. La entidad tiene el derecho a que le sean pagadas las sumas de dinero a que haya lugar, pero no a costa del goce efectivo del derecho a la salud de una persona.

4.4.5.2. *La financiación de los servicios de salud no contemplados dentro de los planes obligatorios, en cada caso concreto.*

El segundo caso en el que una persona *requiere* un servicio médico *con necesidad*, se presenta cuando éste no se encuentra incluido en el Plan Obligatorio al que tiene acceso una persona, que carece de la capacidad económica —parcial o total, temporal o definitiva— para asumir el costo adicional que le corresponde por el servicio, de acuerdo a la reglamentación. Este caso ya fue analizado anteriormente (*ver apartado 4.4.3.*), por lo que basta ahora señalar que las reglas referentes a cuándo se entiende que una persona carece de recursos, y cómo se prueba tal situación, le son aplicables.

4.4.5.3. *Determinación de la capacidad económica, en cada caso concreto. El concepto de carga soportable.*

Se entiende que una persona carece de capacidad de pago cuando no tiene los recursos para sufragar cierto costo, o cuando se afecta su ‘*mínimo vital*’.

Como lo ha reiterado en varios casos la jurisprudencia constitucional, el derecho al mínimo vital no es una cuestión ‘*cuantitativa*’ sino ‘*cualitativa*’. El mínimo vital de una persona depende de las condiciones socioeconómicas específicas en la que esta se encuentre, así como de las obligaciones que sobre ella pesen. El derecho al mínimo vital “*no sólo comprende un elemento cuantitativo de simple subsistencia, sino también un componente cualitativo relacionado con el respeto a la dignidad humana. Su valoración, pues, no será abstracta y dependerá de las condiciones concretas del accionante.*” Teniendo en cuenta que el mínimo vital es de carácter cualitativo, no cuantitativo, se ha tutelado el derecho a la salud de personas con un ingreso anual y un patrimonio no insignificante, siempre y cuando el costo del servicio de salud requerido afecte desproporcionadamente la estabilidad económica de la persona. Por ejemplo, un servicio de salud que se requiere constantemente y cuyo costo es superior a la mitad de los ingresos de la persona, o un servicio que se requiere una sola vez, pero que equivale a casi al doble de los ingresos mensuales de la persona. Puede suceder que a una misma persona le sea imposible pagar un servicio cuyo costo es elevado pero si tenga capacidad económica para cancelar el valor de los medicamentos. No obstante, la Corte no ha concedido la tutela en ciertos eventos, así el costo al servicio fuera cercano a una quinta parte de los ingresos de la persona. De otro lado, en varias ocasiones la jurisprudencia ha señalado que se presume la falta de capacidad económica en cabeza de los beneficiarios del SISBEN. Pero esta condición fáctica que se presume en tales situaciones, puede ser desvirtuada y, en todo caso, depende del costo del servicio a asumir. La jurisprudencia ha sostenido, incluso, que un sujeto de especial protección constitucional, en una precaria situación económica, sí tiene la capacidad de pago para asumir el costo del servicio si éste no es alto.

#### 4.4.5.4. *La falta de capacidad económica puede ser temporal o permanente.*

La jurisprudencia constitucional ha protegido a las personas tanto en los casos en los que carece de la capacidad económica para asumir el costo del respectivo tratamiento, como en aquellos casos en los sí tiene la capacidad para asumirlo, pero no antes del momento en el que requiere acceder al servicio de salud ordenado. Para determinar los casos en los cuales debe eximirse al afiliado de pagos, con el fin de garantizar su derecho constitucional a la salud, esta Corte ha desarrollado dos reglas:

*“(…) [1] Cuando la persona que necesita con urgencia un servicio médico carece de la capacidad económica para asumir el valor de la cuota moderadora, la entidad encargada de garantizar la prestación del servicio de salud deberá asegurar el acceso del paciente a éste, asumiendo el 100% del valor. [2] Cuando una persona requiere un servicio médico y tiene la capacidad económica para asumirlo, pero tiene problemas para hacer la erogación correspondiente antes de que éste sea prestado, la entidad encargada de la prestación, exigiendo garantías adecuadas, deberá brindar oportunidades y formas de pago de la*

*cuota moderadora sin que su falta de pago pueda convertirse de forma alguna en obstáculo para acceder a la prestación del servicio*

*Se encuentran por fuera de esta hipótesis las personas que tienen la capacidad económica para asumir el valor de la cuota moderadora y la capacidad para realizar efectivamente el pago antes de recibir el servicio requerido, puesto que en estos eventos dicha cuota no constituye un obstáculo para acceder al servicio médico, lo que hace improcedente el amparo por vía de tutela.”*

En la medida que la incapacidad económica puede ser temporal, las órdenes del juez de tutela que garanticen el acceso a un servicio de salud de carácter indefinido, pueden estar condicionadas a que se mantenga la imposibilidad de asumir los costos del servicio. Concretamente, la jurisprudencia constitucional ha condicionado órdenes indefinidas, mediante las cuales se garantiza el acceso de una persona a todos los “servicios de salud que determine su médico tratante”, a que se demuestre ante el juez de tutela que la situación económica se ha modificado. Este cambio se puede dar porque los recursos con los que cuenta la persona, o su responsable, han aumentado, porque el costo del servicio requerido es menor, o bien por ambas razones.

Pero la capacidad económica puede disminuir. La jurisprudencia también ha protegido aquellos casos en los que una persona sí podía cumplir con los pagos que le correspondían, pero luego, ante una nueva situación económica, no los pueden seguir asumiendo.

#### *4.4.5.5. Reglas probatorias para establecer la capacidad económica.*

Para la jurisprudencia constitucional no es aceptable que una EPS se niegue a autorizar la prestación de un servicio de salud no incluido dentro de los planes obligatorios, porque el interesado no ha demostrado que no puede asumir el costo del servicio de salud requerido. La EPS cuenta con información acerca de la condición económica de la persona, lo que le permite inferir si puede o no cubrir el costo. Por eso, uno de los deberes de las EPS consiste en valorar si, con la información disponible o con la que le solicite al interesado, éste carece de los medios para soportar la carga económica. Esto, sin necesidad de que se acuda a la acción de tutela. Ahora bien, de presentarse una acción de tutela, la EPS debe aportar la información al juez de tutela, para establecer la capacidad económica de los pacientes que requieren servicios de salud no incluidos en el POS o de cuotas moderadoras. El juez de tutela debe presumir la buena fe de toda persona, por lo que debe suponer la veracidad de los reclamos que exponen los ciudadanos respecto a cuál es su situación económica. Sin embargo, se trata de una presunción que puede ser desvirtuada con la información que sea aportada al proceso. Las reglas aplicables han sido fijadas por la jurisprudencia constitucional en los siguientes términos,

*“A continuación se resume las principales subreglas aplicables:*

*1. No existe una tarifa legal en materia probatoria, respecto a la prueba de la incapacidad económica del accionante. Si bien en la SU-819 de 1999 se afirmó que, en el caso que se estaba revisando, el accionante debía aportar un balance certificado por contador o su declaración de renta o un certificado de ingresos y salarios, para probar la incapacidad económica que alegaba, en fallos posteriores, esta Corporación ha aclarado que en la acción de tutela, no existe tarifa legal para que el accionante pruebe la incapacidad económica que alega.*

*La Corte Constitucional ha precisado que los medios probatorios señalados en la sentencia SU-819 de 1999 no son taxativos, y que el accionante dispone de completa libertad para utilizar otros medios probatorios que estén a su alcance, para demostrar que no tiene los medios económicos suficientes para pagar el valor que se le exige, para acceder a un servicio médico determinado.*

*2. La carga probatoria de la incapacidad económica se invierte en cabeza de la EPS o ARS demandada, cuando en el proceso solamente obre como prueba al respecto, la afirmación que en este sentido haya formulado el accionante en el texto de demanda o en la ampliación de los hechos.*

*Esta Corporación ha establecido que, en la medida que las EPS o ARS tienen en sus archivos, información referente a la situación socioeconómica de sus afiliados, estas entidades están en la capacidad de controvertir las afirmaciones formuladas por los accionantes referentes a su incapacidad económica. Por tal razón, su inactividad al respecto, hace que las afirmaciones presentadas por el accionante se tengan como prueba suficiente.*

*3. Los jueces de tutela tienen el deber de decretar pruebas mediante las cuales se pueda comprobar la incapacidad económica alegada por el accionante. Su inactividad al respecto, no puede conducir a que las afirmaciones del accionante al respecto, sean tenidas como falsas, y se niegue por tal razón, la protección de los derechos fundamentales solicitada.*

*4. Ante la ausencia de otros medios probatorios, hechos como el desempleo, la afiliación al sistema de seguridad social en salud en calidad de beneficiario y no de cotizante, pertenecer al grupo poblacional de la tercera edad y tener ingresos mensuales equivalentes a un salario mínimo legal mensual, pueden ser tenidos en cuenta como prueba suficiente de la incapacidad económica del accionante, siempre y cuando tal condición no haya sido controvertida por el demandado.”*

*4.4.5.6. No se puede dejar de proteger el derecho a la salud por falta de pruebas.*

La carencia de medios probatorios dentro de un proceso, que impidan establecer la capacidad económica de la persona que debe asumir el costo del servicio solicitado, no justifica al juez concluir que sí tiene tal capacidad, en especial, si en la acción de tutela la persona alega lo contrario. El juez tiene el deber de corroborar los hechos que dan cuenta de la violación de un derecho fundamental, para lo cual ha de ejercer las facultades que le permiten constatar la veracidad de las afirmaciones, cuando sea del caso. Algunas salas de revisión han concluido que el peticionario no puede ser obligado a demostrar que carece de la capacidad económica para asumir los costos en discusión puesto que ello representaría una carga probatoria imposible frente a una negación indefinida. Independientemente de esta posición lo cierto es que todas las salas coinciden en que se debe partir de la buena fe del peticionario que la EPS puede demostrar que éste si tiene capacidad económica y que en cualquier caso el juez de tutela puede ejercer sus facultades amplias en materia probatoria.

*4.4.5.7. Las entidades del sector de la salud no pueden obstaculizar el acceso a los servicios de salud, para obtener el pago del servicio.*

Una entidad encargada de garantizar la prestación de un servicio de salud que requiere una persona, o encargada de prestarlo, no puede coaccionar a una persona, obligándola a suscribir algún tipo de documento legal para respaldar el pago, como condición para acceder al servicio de salud, en especial, cuando éste se *requiere con necesidad*. En otras palabras, se irrespeta al derecho a la salud al obstaculizar el acceso a un servicio que se *requiere*, en especial *con necesidad*, al exigir previamente un título valor u algún otro tipo de medio de pago legal. En tales casos, la jurisprudencia constitucional ha dejado sin efecto aquellos documentos legales que se dieron como medio de pago, pero que han sido obtenidos de los pacientes, o de sus responsables, mediante presión, como condición para acceder a un servicio *requerido con necesidad*. También ha tutelado el derecho a la salud de una persona, cuando se utiliza la suscripción de un título valor en condiciones de presión, por ejemplo, cuando se le impide al paciente salir de la entidad de salud en que se le atendió, hasta tanto no pague el servicio.

*4.4.5.8. No se puede negar el acceso a un servicio de salud, por omitir algunas cotizaciones, cuando la entidad se allanó a la mora al recibir nuevos pagos.*

En algunos casos, los servicios de salud contemplados por la regulación, y a los cuales tiene acceso una persona, dependen del cumplimiento de ciertos requisitos como, por ejemplo, verificar que los aportes se hayan realizado oportunamente. Así pues, existen una serie de casos en los que se obstaculiza a las personas el acceso a un servicio al que tienen derecho, con base en interpretaciones descontextualizadas de las normas contrarias a la garantía del

goce efectivo del derecho. Tal es el caso, por ejemplo, de las licencias de maternidad o de las incapacidades laborales. La jurisprudencia constitucional, por ejemplo, ha señalado que la acción de tutela es procedente, de manera excepcional, para reclamar el pago de incapacidades laborales, por la importancia que estas prestaciones revisten para la garantía de los derechos fundamentales del trabajador al mínimo vital, a la salud y a la dignidad humana. Específicamente, ha señalado que cuando una entidad promotora de salud no ha hecho uso de los diferentes mecanismos de cobro que se encuentran a su alcance para lograr el pago de los aportes atrasados, se allana a la mora y, por ende, no puede fundamentar el no reconocimiento de una incapacidad laboral en la falta de pago o en la cancelación extemporánea de las cotizaciones.

#### *4.4.5.9. El deber de solidaridad y de asumir cargas soportables.*

Cuando una persona que tiene capacidad económica no paga el costo adicional que le corresponde para acceder a un servicio de salud no contemplado en el plan obligatorio de salud, la barrera al acceso es impuesta por la misma persona, no por las entidades de salud. La Corte Constitucional no ha tutelado el derecho a la salud en esos casos, incluso cuando se trata de niños. No obstante, si el servicio se requiere con urgencia, la Corte ha ordenado a la entidad encargada de garantizar la prestación del servicio que lo autorice, por una parte, y ha exigido a los padres (o a los responsables) cancelar a la EPS en 48 horas el costo que les corresponda asumir. En tales casos es la propia acción de los padres la que *irrespeto* el derecho de su hijo o hija, al obstaculizarlo por no asumir la obligación que les corresponde.

Además, eximir a una persona con capacidad de pago del deber de pagar los costos razonables del servicio, implica desconocer el principio de solidaridad dado que los recursos escasos del Fosyga terminan asignándose a quien tiene condiciones económicas suficientes en lugar de beneficiar a quienes son pobres o carecen de capacidad económica para asumir el costo de cierto servicio médico.

#### **4.4.6. La prestación de los servicios debe ser oportuna, eficiente y de calidad. El principio de integralidad.**

Cuando el servicio incluido en el POS sí ha sido reconocido por la entidad en cuestión, pero su prestación no ha sido garantizada oportunamente, generando efectos tales en la salud, como someter a una persona a intenso dolor, también se viola el derecho a la salud y debe ser objeto de tutela por parte del juez constitucional. Cuando el acceso a un servicio de salud no es prestado oportunamente a una persona, puede conllevar además de un *irrespeto* a la salud por cuanto se le impide acceder en el momento que correspondía a un servicio de salud para poder recuperarse, una amenaza grave a la salud por cuanto la salud puede deteriorarse considerablemente. Esto ocurre, por ejemplo, en los casos de las personas con VIH o sometidas a tratamientos con antibióticos, donde el suministro oportuno de los medicamentos requeridos es

indispensable no sólo para conservar el grado de salud de una persona, sino también para evitar su deterioro.

De forma similar, los servicios de salud que se presten a las personas deben ser de calidad. Para las entidades obligadas a garantizar la prestación del servicio, *respetar* ese derecho, supone, por ejemplo, que a la persona no se le debe entregar un medicamento u otro tipo de servicio médico de mala calidad, que desmejore la salud de la persona.

Si bien los conceptos de oportunidad, eficiencia y calidad de los servicios de salud comprenden muchos aspectos, la jurisprudencia constitucional se ha ocupado frecuentemente de problemas recurrentes a los cuales ha respondido aludiendo al principio de integralidad y al principio de continuidad, entre otros.

#### 4.4.6.1. *Las entidades deben garantizar integralmente el acceso a los servicios de salud requeridos.*

El principio de integralidad ha sido postulado por la Corte Constitucional ante situaciones en las cuales los servicios de salud requeridos son fraccionados o separados, de tal forma que al interesado la entidad responsable solo le autoriza una parte de lo que debería recibir para recuperar su salud y lo obliga a costearse por sí mismo la otra parte del servicio médico requerido. Esta situación de fraccionamiento del servicio tiene diversas manifestaciones en razón al interés que tiene la entidad responsable en eludir un costo que a su juicio no le corresponde asumir.

Este principio ha sido desarrollado en la jurisprudencia de la Corte Constitucional con base en diferentes normas legales y se refiere a la atención y el tratamiento completo a que tienen derecho los usuarios del sistema de seguridad social en salud, según lo prescrito por el médico tratante.

Al respecto ha dicho la Corte que “(...) *la atención y el tratamiento a que tienen derecho los pertenecientes al sistema de seguridad social en salud cuyo estado de enfermedad esté afectando su integridad personal o su vida en condiciones dignas, son integrales; es decir, deben contener todo cuidado, suministro de medicamentos, intervenciones quirúrgicas, prácticas de rehabilitación, exámenes para el diagnóstico y el seguimiento, así como todo otro componente que el médico tratante valore como necesario para el pleno restablecimiento de la salud del paciente o para mitigar las dolencias que le impiden llevar su vida en mejores condiciones; y en tal dimensión, debe ser proporcionado a sus afiliados por las entidades encargadas de prestar el servicio público de la seguridad social en salud*”

En la medida en que las personas tienen derecho a que se les garantice el tratamiento de salud que requieran, integralmente, en especial si se trata de una enfermedad ‘catastrófica’ o si están comprometidas la vida o la integridad personal, las entidades territoriales no pueden dividir y fraccionar los servicios

de salud requeridos por las personas. Así por ejemplo, un Departamento, entidad encargada de prestar la atención a personas con cáncer, no puede dejar de garantizar el suministro de oxígeno domiciliario permanente a un enfermo de cáncer que lo requiere como parte integral de su tratamiento, bajo el argumento de que el servicio de oxígeno, individualmente considerado, corresponde a las entidades municipales. En lo que se refiere a garantizar el acceso efectivo al servicio de salud requerido a una persona, puede entonces decirse, que las entidades e instituciones de salud son solidarias entre sí, sin perjuicio de las reglas que indiquen quién debe asumir el costo y del reconocimiento de los costos adicionales en que haya incurrido una entidad que garantizó la prestación del servicio de salud, pese a no corresponderle.

Es importante subrayar que el principio de integralidad no significa que el interesado pueda pedir que se le suministren todos los servicios de salud que desee o estime aconsejables. Es el médico tratante adscrito a la correspondiente EPS el que determina lo que el paciente requiere. De lo contrario el principio de integralidad se convertiría en una especie de cheque en blanco, en lugar de ser un criterio para asegurar que al usuario le presten el servicio de salud ordenado por el médico tratante de manera completa sin que tenga que acudir a otra acción de tutela para pedir una parte del mismo servicio de salud ya autorizado.

#### *4.4.6.2. El transporte y la estadía como medio para acceder a un servicio.*

Si bien el transporte y hospedaje del paciente no son servicios médicos, en ciertos eventos el acceso al servicio de salud depende de que al paciente le sean financiados los gastos de desplazamiento y estadía en el lugar donde se le pueda prestar atención médica.

La jurisprudencia constitucional, fundándose en la regulación, ha señalado en varias ocasiones que toda persona tiene derecho a acceder a los servicios de salud que requiera, lo cual puede implicar tener derecho a los medios de transporte y gastos de estadía para poder recibir la atención requerida. Así, por ejemplo, ha señalado que la obligación de asumir el transporte de una persona se trasladada a las entidades promotoras únicamente en los eventos concretos donde se acredite que “(i) *ni el paciente ni sus familiares cercanos tienen los recursos económicos suficientes para pagar el valor del traslado y (ii) de no efectuarse la remisión se pone en riesgo la vida, la integridad física o el estado de salud del usuario.*” La jurisprudencia constitucional ha reconocido el derecho a acceder al transporte necesario para acceder al servicio de salud requerido, e incluso a la manutención cuando el desplazamiento es a un domicilio diferente al de la residencia del paciente, si se carece de la capacidad económica para asumir tales costos.

Pero no sólo se ha garantizado el derecho al transporte y a otros costos que supone el desplazamiento a otro lugar distinto a aquel de residencia, para acceder a un servicio de salud requerido. También se ha garantizado la posibilidad de que se brinden los medios de transporte y traslado a un

acompañante cuando este es necesario. La regla jurisprudencial aplicable para la procedencia del amparo constitucional respecto a la financiación del traslado del acompañante ha sido definida en los siguientes términos, “(i) *el paciente sea totalmente dependiente de un tercero para su desplazamiento*, (ii) *requiera atención permanente para garantizar su integridad física y el ejercicio adecuado de sus labores cotidianas* y (iii) *ni él ni su núcleo familiar cuenten con los recursos suficientes para financiar el traslado*.”

Así pues, toda persona tiene derecho a que se remuevan las barreras y obstáculos que impidan a una persona acceder a los servicios de salud que *requiere con necesidad*, cuando éstas implican el desplazamiento a un lugar distinto al de residencia, debido a que en su territorio no existen instituciones en capacidad de prestarlo, y la persona no puede asumir los costos de dicho traslado. También, como se indicó, tiene derecho a que se costee el traslado de un acompañante, si su presencia y soporte se requiere para poder acceder al servicio de salud.

#### 4.4.6.3. *Deber de garantizar el acceso a los servicios de salud, libre de trámites y procedimientos administrativos engorrosos e innecesarios.*

El acceso al servicio médico requerido pasa, a veces, por la superación de determinados trámites administrativos. Esto es razonable, siempre que tales trámites no demoren excesivamente el acceso al servicio y no impongan al interesado una carga que no le corresponde asumir. De ello también dependen la oportunidad y calidad del servicio.

La jurisprudencia constitucional ha garantizado el derecho a acceder a los servicios de salud, libre de obstáculos burocráticos y administrativos. Así, por ejemplo, cuando por razones de carácter administrativo diferentes a las razonables de una administración diligente, una EPS demora un tratamiento médico al cual la persona tiene derecho, viola el derecho a la salud de ésta. Los trámites burocráticos y administrativos que demoran irrazonablemente el acceso a un servicio de salud al que tienen derecho, irrespetan el derecho a la salud de las personas.

Expresamente, la regulación ha señalado que “(...) los trámites de verificación y autorización de servicios no podrán ser trasladados al usuario y serán de carga exclusiva de la institución prestadora de servicios y de la entidad de aseguramiento correspondiente.” En especial, se ha considerado que se *irrespet*a el derecho a la salud de los pacientes cuando se les niega el acceso a un servicio por no haber realizado un trámite interno que corresponde a la propia entidad, como por ejemplo, ‘la solicitud de la autorización de un servicio de salud no incluido dentro del POS al Comité Técnico Científico’.

#### 4.4.6.4. *El principio de continuidad; el acceso a un servicio de salud debe ser continuo, y no puede ser interrumpido súbitamente.*

Desde el inicio de su jurisprudencia la Corte Constitucional ha defendido el

derecho que a toda persona se le garantice la continuidad del servicio de salud, una vez éste haya sido iniciado. Se garantiza pues, que el servicio de salud no sea interrumpido, súbitamente, antes de la recuperación o estabilización del paciente. Para la jurisprudencia “(...) puede hacerse la distinción entre la relación jurídica- material, esto es la prestación del servicio que se materializa en una obligación de medio o de resultado según el caso, y la relación jurídica-formal, que se establece entre la institución y los usuarios.” Una institución encargada de prestar el servicio de salud, puede terminar la relación jurídico-formal con el paciente de acuerdo con las normas correspondientes, pero ello no implica que pueda dar por terminada inmediatamente la relación jurídica-material, en especial si a la persona se le está garantizando el acceso a un servicio de salud. Esta protección se ha reconocido en diferentes ámbitos, como por ejemplo, las Fuerzas Armadas.

La jurisprudencia constitucional considera que “(...) ‘es violatorio del derecho fundamental a la salud de un menor que una ESS, EPS o ARS le suspenda el suministro de un tratamiento médico que requiera, antes de que éste haya sido efectivamente asumido por otro prestador.’” La Corte ha afirmado que “los servicios de salud que se deba continuar prestando pueden estar o no incluidos en los Planes Obligatorios (POS y POSS). Para la Corte, si tales servicios (i) se encuentran fuera del Plan, (ii) venían siendo prestados por la entidad accionada (ARS, EPS o empresa solidaria de salud a la que se encuentre afiliado el menor), y (iii) son necesarios para tratar o diagnosticar una patología grave que padece, entonces, será la entidad accionada (EPS, ARS, o empresa solidaria de salud a la que se encuentre afiliado) la encargada de continuar con su suministro, con cargo a recursos del Fosyga, hasta tanto otra entidad prestadora de servicios de salud asuma de manera efectiva la prestación de los servicios requeridos. Una vez suministrado el servicio médico excluido del Plan, la entidad respectiva tendrá derecho a repetir contra este fondo. De otro lado, considera la Corte que si los servicios requeridos (i) se encuentran dentro del Plan (POS o POSS), (ii) venían siendo prestados por la entidad accionada (EPS, ARS o por la empresa solidaria de salud a la que se encuentre afiliado el menor) y (iii) fueron ordenados por su médico tratante, entonces, será la entidad accionada (EPS, ARS o la empresa solidaria de salud a la que se encuentre afiliado el menor), la encargada de continuar con su suministro, con cargo a sus propios recursos.”

El derecho constitucional de toda persona a acceder, con continuidad, a los servicios de salud que una persona requiere, no sólo protege el derecho a mantener el servicio, también garantiza las condiciones de calidad en las que se accedía al mismo. Así lo consideró la Corte, siguiendo al Comité de Derechos Económicos, Sociales y Culturales y la propia jurisprudencia constitucional. Para establecer si una entidad viola el derecho de una persona al acceso a los servicios de salud al desmejorar las condiciones de acceso al mismo, la Corte advirtió que el juez debe estimar, por lo menos, dos aspectos. En primer lugar, (1) el juez debe definir “(...) si la medida resultante no constituye una política pública regresiva, no justificada con base en la consecución de un fin constitucionalmente legítimo y que fue tomada sin realizar un análisis suficiente de otras posibilidades distintas a la medida

contraria al cumplimiento del deber de progresividad. En caso que este análisis resulte fallido, la medida vulnerará el derecho a la salud y, por ende, no será admisible. En segundo lugar, (2) cuando se acredite que la política adoptada no es regresiva e injustificada, será procedente el ejercicio de ponderación entre los postulados antes anotados, labor que deberá satisfacer dos requisitos básicos [a] que la medida resultante no afecte el núcleo esencial de cada postulado, constituyéndose como una política desproporcionada o irrazonable que impide el goce cierto del derecho a la salud. [...] [y b] que la política implantada sea compatible con la protección adecuada de los fines básicos del derecho a la salud, entre ellos, y en un lugar central, la conservación de la vida en condiciones dignas. (...)”. Así pues, una entidad encargada de garantizar el acceso al servicio de salud, no desconoce el derecho de un paciente al desmejorar las condiciones en las que éste accede a un servicio de salud que requiere, cuando (i) las razones del cambio tienden a garantizar el disfrute del nivel más alto de salud posible de la persona, en especial, garantizar la vida en condiciones dignas; (ii) el cambio no constituye una afectación injustificada del principio de progresividad del derecho a la salud ni afecta el contenido esencial de los postulados de accesibilidad y calidad; y (iii) el cambio no implica una barrera que impida específicamente el acceso del paciente.

Aplicando esta decisión jurisprudencial, la Corte concluyó que el Seguro Social EPS no vulneró los derechos fundamentales de un grupo de pacientes al que brindó el tratamiento de hemodiálisis inicialmente en una ciudad distinta a aquella en la cual vivían (Santa Marta y Barranquilla), luego fueron tratadas en su domicilio (Riohacha), y, posteriormente, fueron nuevamente tratados fuera de su lugar de residencia (Santa Marta). En primer lugar, la Corte constató que la decisión de la entidad imponía condiciones menos favorables a las que existían, pero no contrariaba el principio de progresividad aplicado al derecho a la salud, porque ésta se adoptó con sustento en motivos suficientemente fundados, basados en la obligación de conservar las condiciones de seguridad médico científicas para la atención de sus pacientes con afecciones renales, las cuales están estrechamente relacionadas con la debida protección del derecho fundamental a la vida en condiciones dignas de los accionantes. La Corte estimó al respecto: “(...) no existían otras posibilidades de atención menos gravosas que el traslado de los pacientes a Santa Marta, puesto que la única unidad renal ubicada en Riohacha era, precisamente, la que fue descalificada por la auditoría, por lo que no había otra opción distinta a reubicar a los usuarios al centro urbano más cercano. Así las cosas, la medida adoptada por el Seguro Social no es contraria al principio de progresividad.” Comprobado el primer requisito de análisis del caso (“*relativo a la inexistencia de una medida regresiva e injustificada que afecte el derecho a la salud*”), pasó a estudiar el segundo elemento (determinar ‘*si la decisión del ente accionado afecta el contenido mínimo esencial del derecho a la salud, en sus elementos de accesibilidad y calidad*’). Al respecto la Corte manifestó que la finalidad de la decisión era “garantizar el cumplimiento de los estándares mínimos para la prestación del servicio médico asistencial, necesarios para salvaguardar la vida y la salud de los usuarios del servicio[, pues] si la evaluación efectuada por el ente accionado demostró el

incumplimiento sistemático de estos requisitos por parte de la unidad renal Fanny Ramírez, el hecho de continuar con la ejecución de los procedimientos de hemodiálisis en esta institución afectaría los derechos fundamentales de los pacientes [...], la decisión tomada por el Seguro Social, en el sentido de suspender la atención de sus pacientes en dicha unidad, no sólo era una actuación administrativa admisible sino constitucionalmente obligatoria.” También concluyó que la decisión no desconocía las obligaciones mínimas de asegurar el derecho a la salud, por cuanto el servicio de transporte entre ambas ciudades es de fácil acceso y los pacientes no carecían de los recursos económicos necesarios para desplazarse entre una y otra; en otras palabras, la decisión de la entidad no imponía una barrera en el acceso al servicio de salud.

Luego de haber presentado las reglas básicas del derecho constitucional a acceder a los servicios de salud que se requieran, pasa la Sala a mencionar algunas de las particularidades que tiene este derecho cuando se trata de sujetos de especial protección constitucional, como las niñas y los niños.

#### **4.5. Acceso a los servicios de salud que requieren los sujetos de especial protección constitucional, como los niños y las niñas**

4.5.1. La Corte Constitucional ha reconocido y tutelado principalmente el derecho a la salud, de los sujetos de especial protección constitucional. En primer lugar ha protegido a los niños y las niñas, cuyo derecho a la salud es expresamente reconocido como fundamental por la Carta Política (art. 44, CP). Pero también ha reconocido la protección especial que merecen, por ejemplo, las mujeres embarazadas las personas de la tercera edad y las personas con alguna discapacidad. Adicionalmente, la jurisprudencia constitucional ha garantizado especialmente el derecho fundamental a la salud de aquellas personas que se encuentran en una relación de sujeción, como por ejemplo, las personas vinculadas a las Fuerzas Armadas o las personas privadas de la libertad.

4.5.2. La jurisprudencia constitucional ha reconocido la especial protección que merecen los niños en materia de salud. Como lo señaló la Sala Plena de la Corte, “[l]a Constitución de 1991 significó un cambio sustancial en la concepción que tenía el sistema jurídico sobre los niños. De ser sujetos incapaces con derechos restringidos y hondas limitaciones para poder ejercerlos pasaron a ser concebidos como personas libres y autónomas con plenitud de derechos, que de acuerdo a su edad y a su madurez pueden decidir sobre su propia vida y asumir responsabilidades. La condición de debilidad o vulnerabilidad en la que los menores se encuentran, la cual van abandonando a medida que crecen, ya no se entiende como razón para restringir sus derechos y su capacidad para ejercerlos. Ahora es la razón por la cual se les considera “sujetos de protección especial” constitucional. Es decir, la condición en la que se encuentra un menor no es razón para limitar sus derechos sino para protegerlo. Pero esta protección tiene una finalidad liberadora del menor y promotora de su dignidad. Por eso, los derechos de los niños deben interpretarse a la luz del respeto y la defensa que demanda la

*Constitución de su autonomía y de su libertad (pro libertatis)."* La Constitución Política, para proteger a los menores, reconoce a sus derechos categoría y valor especiales. Por una parte se considera que son *fundamentales*, lo cual afecta tanto el contenido del derecho como los mecanismos aceptados para reclamar su protección. Por otra parte se les otorga especial valor al indicar que "*los derechos de los niños prevalecen sobre los derechos de los demás*" (art. 44, CP). Concretamente, se reconoce su derecho fundamental a la salud. Las medidas de protección especial que se debe a los menores deben tener por finalidad garantizar a los niños (i) su *desarrollo armónico e integral* y (ii) *el ejercicio pleno de sus derechos*." El desarrollo de un menor es *integral* cuando se da en las diversas dimensiones de la persona (intelectual, afectiva, deportiva, social, cultural). El desarrollo de un menor es *armónico* cuando no se privilegia desproporcionadamente alguno de los diferentes aspectos de la formación del menor, ni cuando se excluye o minimiza en exceso alguno de ellos.

4.5.2.1. La jurisprudencia constitucional ha expresado en forma reiterada que el derecho a la salud de los niños, en tanto '*fundamental*', debe ser protegido en forma inmediata por el juez constitucional en los casos en que sea amenazado o vulnerado. En el caso de los niños y de las niñas, la acción de tutela procede directamente para defender su derecho fundamental a la salud; no se ha requerido, pues, que exista conexidad con otro derecho como la vida o la integridad. La jurisprudencia ha señalado que los servicios de salud que un niño o una niña requieran son justiciables, incluso en casos en los que se trate de servicios no incluidos en los planes obligatorios de salud (del régimen contributivo y del subsidiado).

4.5.2.2. *La protección a los niños es mayor*, pues, por ejemplo, se garantiza su acceso a servicios de salud que requiera para asegurar desarrollo armónico e integral. La jurisprudencia constitucional ha tutelado, por ejemplo, la práctica de cirugías plásticas de malformaciones, aun cuando no afecten la integridad funcional de órgano alguno. Se ha protegido a menores de escasos recursos la posibilidad de acceder a medicamentos para atender afecciones corrientes, pero de gran impacto en un niño o una niña, como la conjuntivitis. La fundamentalidad del derecho a la salud de los niños ha llevado a la Corte Constitucional a protegerlos incluso para evitar que contraigan enfermedades. Tal es el caso del acceso a vacunas para prevenir el contagio de enfermedades cuando puedan afectar significativamente su salud y exista el riesgo de contagio. Igualmente, se les ha garantizado aspectos básicos del derecho a la salud, como el derecho a que se actualice la orden del médico tratante cuando su desarrollo físico puede conllevar modificaciones al tratamiento, o el derecho al diagnóstico. Se les protege también de los abusos en los que puedan incurrir las EPS o las IPS, como por ejemplo, impedirle salir de un establecimiento de salud a un menor, hasta tanto alguien no haya firmado un título valor equivalente al costo del servicio, especialmente, si el menor se encuentra en situación de indefensión y vulnerabilidad. También se ha tutelado el derecho fundamental a la salud de un menor a que no se le cobren pagos moderadores cuando estos se constituyen en barreras al acceso de un servicio de salud, tanto si éste se requiere por ser necesario o por ser complementario y

útil. La jurisprudencia ha protegido especialmente, entre los menores, a los bebés recién nacidos, considerando, por ejemplo, que una EPS viola los derechos de un menor al condicionar la atención médica a periodos mínimos de tiempo, en especial si se trata de servicios de salud que están incluidos dentro del Plan Obligatorio de Salud. También reciben una especial protección de la jurisprudencia constitucional si concurren dos condiciones de vulnerabilidad, como ocurre, por ejemplo con los menores con discapacidad. Por ejemplo, ha señalado que una niña con discapacidad mental, tiene derecho a acceder a una cirugía de ligadura de trompas, autorizada por sus padres, siempre y cuando la decisión sea producto de un debido proceso orientado a respetar, en la mayor medida posible, la voluntad autónoma de la menor.

En la sentencia T-695 de 2007, por ejemplo, la Corte estudio el caso de un menor autista al que la EPS negaba el tratamiento de rehabilitación integral por considerar que se encontraba excluido del plan obligatorio de salud. En esa oportunidad la Sala Segunda de Revisión protegió los derechos fundamentales del menor y reiteró su jurisprudencia sobre protección especial de los niños y las niñas en los siguientes términos,

*“La jurisprudencia de esta Corporación ha señalado reiteradamente que el derecho a la salud de los niños, al lado de otros derechos, es en sí mismo un derecho fundamental, con carácter prevalente sobre los derechos de todos los demás. Esta regla encuentra su fundamento en el artículo 44 de la Constitución que señala expresamente: “Son derechos fundamentales de los niños: la vida, la integridad física, la salud y la seguridad social (...). La familia, la sociedad y el Estado tienen la obligación de asistir y proteger al niño para garantizar su desarrollo armónico e integral y el ejercicio pleno de sus derechos. (...) Los derechos de los niños prevalecen sobre los derechos de los demás”. También el artículo 13 ordena al Estado la protección especial de las personas que se encuentren en condiciones de debilidad manifiesta.”*

En la misma sentencia, la Corte recordó algunos de los compromisos internacionales en cuanto a la protección de los niños y las niñas, en relación con su derecho a la salud, sin discriminación ni distinciones fundadas exclusivamente en el ingreso de los padres. Dijo al respecto,

*“Por otra parte, esta regla también encuentra respaldo en diversos instrumentos internacionales que les otorgan a los niños el estatus de sujetos de protección especial y, específicamente en el campo de la salud, reconocen el derecho a la salud de los menores como fundamental. En la sentencia T-037 de 2006 se recordaron algunos de estos instrumentos:*

*(1) Convención sobre los Derechos del Niño, en el artículo 24 reconoce ‘el derecho del niño al disfrute del más alto nivel posible de salud y a servicios para el tratamiento de las enfermedades y la*

*rehabilitación de la salud. Los Estados Partes se esforzarán por asegurar que ningún niño sea privado de su derecho al disfrute de esos servicios sanitarios. Los Estados Partes asegurarán la plena aplicación de este derecho, y, en particular, adoptarán las medidas apropiadas para: (...) b) Asegurar la prestación de la asistencia médica y la atención sanitaria que sean necesarias a todos los niños, haciendo hincapié en el desarrollo de la atención primaria de salud.'*

*(2) Declaración de los Derechos del Niño que en el artículo 4 dispone que '[E]l niño debe gozar de los beneficios de la seguridad social. Tendrá derecho a crecer y desarrollarse en buena salud, con este fin deberán proporcionarse tanto a él como a su madre, cuidados especiales, incluso atención prenatal y postnatal. El niño tendrá derecho a disfrutar de alimentación, vivienda, recreo y servicios médicos adecuados'.*

*(3) Comité de Derechos Económicos, Sociales y Culturales de las Naciones Unidas fijó en el Pacto Internacional de Derechos Económicos, Sociales y Culturales algunos parámetros que propenden por la protección de los derechos fundamentales de los niños como por, ejemplo en el numeral 2° del artículo 12 del citado pacto se establece: a), es obligación de los Estados firmantes adoptar medidas necesarias para 'la reducción de la mortalidad y de la mortalidad infantil, y el sano desarrollo de los niños'; mientras que el literal d) dispone que se deben adoptar medidas necesarias para 'la creación de condiciones que aseguren a todos asistencia médica y servicios médicos en caso de enfermedad'.*

*(4) Pacto Internacional de Derechos Civiles y Políticos que en su artículo 24 establece: Todo Niño tiene derecho sin discriminación alguna por motivos de raza, color, sexo, idioma, religión, origen nacional o social, posición económica o nacimiento, a las medidas de protección que su condición de menor requiere tanto por parte de su familia como de la sociedad y del Estado*

*(5) Convención Americana de Derechos Humanos, que en su artículo 19 señala que 'todo niño tiene derecho a las medidas de protección que su condición de menor requiere por parte de su familia, de la sociedad y del Estado'.*

*(6) Declaración Universal de Derechos Humanos de 1948 que, en su artículo 25-2, establece que 'la maternidad y la infancia tienen derecho a cuidados de asistencia especiales', y que "todos los niños, nacidos de matrimonio o fuera de matrimonio, tienen derecho a igual protección social'. (Al respecto, ver también el segundo anexo de la presente sentencia sobre desarrollo internacional y regional del derecho a la salud).*

4.5.2.3. No obstante, la protección que brinda la jurisprudencia no es suficiente y en muchas ocasiones ha llegado tarde. No son pocos los niños y las niñas que han fallecido esperando que se les reconociera y protegiera su derecho fundamental a la salud. La protección ideal de los derechos de los niños no se logra con una jurisprudencia constitucional robusta y protectora que los garantice cada vez que sean violados; el ideal es que las prácticas aseguren los derechos de los menores de tal forma que no sea necesario ir ante un juez a solicitar su defensa.

Concluye así la Sala, un breve recuento de algunas de las reglas jurisprudenciales sobre el derecho a acceder a los servicios de salud, en especial aquellas relevantes para la solución de los casos de acción de tutela acumuladas al presente proceso. Pasa a continuación entonces, a analizar los problemas jurídicos concretos derivados de los expedientes.

## **5. Resolución de los casos concretos de acción de tutela que forman parte del presente proceso**

Los casos acumulados para ser resueltos conjuntamente en la presente sentencia, hacen referencia a situaciones en las que se alega que se viola el derecho a la salud, por cuanto se obstaculiza el acceso a los servicios requeridos. Los problemas jurídicos que estos casos plantean ya han sido resueltos por la jurisprudencia constitucional de forma reiterada, aplicando las reglas jurisprudenciales mencionadas en el anterior apartado de esta sentencia. A continuación, la Sala aplicará la jurisprudencia constitucional pertinente a cada uno de los casos, e indicará cuáles medidas se han de adoptar, teniendo en cuenta las órdenes impartidas previamente mediante las medidas cautelares respectivas.

Adicionalmente, como se indicó al inicio de las consideraciones de la presente sentencia, en la medida en que los casos tratados son una muestra de las tutelas que frecuentemente son ventiladas ante los jueces del país, también se hará referencia a los problemas estructurales con los cuáles estos casos se encuentran relacionados.

En el análisis de los problemas jurídicos, tanto los referidos a las cuestiones concretas como los atinentes a la regulación, la Sala de Revisión distinguirá las clases de violaciones de acuerdo a los diferentes tipos de obligaciones que se derivan del derecho fundamental a la salud, esto es, obligaciones de *respeto*, de *protección* y de *cumplimiento* o *garantía* (ver apartado 3.4.2.9.). En la mayoría de los casos concretos, se trata de violaciones al derecho a la salud en que se desconocen obligaciones de respeto. Se trata de casos en los que la violación al derecho es flagrante, porque las entidades obstaculizan el acceso a los servicios de salud requeridos. Las órdenes en estas situaciones buscan asegurar el goce efectivo del derecho a la salud de cada tutelante, impidiendo que por acción u omisión, se obstaculice a una persona el acceso a un servicio de salud que requiera. En el segundo conjunto de problemas

analizados, los referentes a las fallas en la regulación, la mayoría de obligaciones que se desconocen son de protección. En una perspectiva más amplia se trata de obligaciones complejas y de carácter progresivo, cuyo cumplimiento supone las acciones y omisiones de diversas entidades, en un período de tiempo dentro de su respectiva órbita de competencia. Estas órdenes están orientadas a lograr que los vacíos o fallas en el marco regulatorio sean superados por los órganos competentes dentro del respeto a los derechos fundamentales, en especial, el derecho a la salud.

### **5.1. El derecho a la salud comprende el derecho a acceder a los servicios de salud que se *requieran con necesidad***

El primer problema jurídico planteado por los casos acumulados es el siguiente, ¿Desconoce el derecho a la salud una entidad encargada de garantizar la prestación de los servicios requeridos, cuando no autoriza a una persona un servicio que *requiere* y el cual alega no poder costearse por sí misma, por el hecho de que no se encuentra incluido en el plan obligatorio de salud? Como se dijo, para la jurisprudencia constitucional la respuesta es afirmativa (*ver apartado 4.4.3.*). Una entidad prestadora de servicios viola el derecho a la salud de una persona cuando no autoriza un servicio que *requiera*, únicamente por el hecho de que no éste incluido en el plan obligatorio de servicios. Toda persona tiene el derecho constitucional a acceder a los servicios de salud que *requiera con necesidad*. Además, una EPS viola el derecho a la salud de una persona, cuando se le niega el acceso al servicio con base en el argumento de que la persona no ha presentado la solicitud al Comité Técnico Científico: ‘*las EPS no pueden imponer como requisito de acceso a un servicio de salud el cumplimiento de cargas administrativas propias de la entidad*’ (*ver apartado 4.4.4.*).

A continuación se aplicará la jurisprudencia a cada uno de los casos analizados.

#### **5.1.1. Expediente T-1281247 (*acceso de un menor a un servicio no incluido en el POS –implante coclear*)**

5.1.1.1. En el primero de los casos acumulados al presente proceso (T-1281247; *acceso de un menor a un servicio no incluido en el POS –implante coclear*), la entidad de salud acusada (Salud Colpatria EPS) alegó que se negaba a autorizarlo, por no estar incluido en el plan obligatorio de servicios y, en consecuencia, no tener la facultad para ordenarlo. La EPS no cuestionó la incapacidad económica de la accionante para asumir el costo del servicio, el hecho de que el médico que había ordenado el tratamiento no estuviera adscrito a su entidad, ni el concepto médico según el cual el servicio se *requería*. La entidad manifestó interés en aclarar al juez que si se ordenaba la prestación del servicio, como se esperaba que ocurriera, se reconociera el derecho de la entidad para repetir el costo del mismo al Estado, a través del Fosyga. En efecto, tal como lo esperaba la entidad acusada, los jueces de ambas instancias conocían y reiteraron la jurisprudencia constitucional sobre

el derecho al acceso a los servicios de salud que se *requieran con necesidad*, en virtud de la cual se ha tutelado en varias ocasiones el acceso a implantes cocleares, siempre y cuando exista certeza médica sobre su idoneidad. En ambas instancias se consideró que el niño, hijo de la accionante, sí tenía derecho a acceder al servicio de salud *requerido*, de acuerdo con el concepto médico. En tal sentido, esta Sala confirmará lo decidido en las sentencias de instancia. Sin embargo, finalmente los jueces resolvieron no tutelar el derecho del menor, porque consideraron que el médico que había ordenado el servicio no estaba adscrito a la EPS, y en tal sentido, faltaba uno de los requisitos de la jurisprudencia para tutelar el acceso al servicio de salud *requerido*. Este segundo problema jurídico, que será analizado posteriormente (*ver sección 5.4*), llevará a la Sala a apartarse de los jueces de instancia y, en consecuencia, a tutelar el derecho a la salud del menor. Ahora bien, la Sala también se pronunciará posteriormente con relación al hecho de por qué se ha de entender que el menor ‘*requería*’ el servicio de implante coclear, teniendo en cuenta que se trata de una prótesis, de la cual no depende ni la salud ni la vida del niño (*ver sección 5.3*).

5.1.1.2. Uno de los aspectos que resalta la Sala en este caso, es la dificultad para establecer si el servicio de salud solicitado se encuentra o no incluido dentro del plan obligatorio de salud, o si está excluido del mismo. En casos similares recientes, ante la incertidumbre sobre el punto, y la necesidad de certeza requerida en toda instancia judicial, la Corte Constitucional se ha visto obligada a vincular al Ministerio de la Protección Social, para que resuelva el asunto, concretamente, con relación al implante coclear. La incertidumbre sobre los contenidos del POS, generada por varios factores, entre ellos, la indeterminación en la regulación, y el conflicto que suscitan las lecturas del POS *garantista* –orientada a asegurar el goce efectivo de los derechos–, *expansiva*, –orientada a entender financiados la mayor cantidad de servicios– y *restrictiva*, –orientada a entender financiados la menor cantidad de servicios posibles–, es un problema de carácter general que será analizado posteriormente por la sentencia. Al abordarlo, se adoptarán las órdenes respectivas, orientadas a que las autoridades correspondientes adopten las medidas adecuadas y necesarias para clarificar los contenidos de los planes obligatorios de salud (*ver apartado 6.1.1*).

5.1.2. Expediente T-1310408 (*acceso a un servicio de salud necesario para preservar la vida o la integridad personal no incluido en el POS, cuando no se tiene la capacidad económica para costearlo –Mamoplastia–*)

5.1.2.1. En este caso, la accionante, Angélica María Rojas Castrillón, interpuso acción de tutela contra Famisanar EPS, por considerar que se violó su derecho a la salud al negársele una cirugía de reducción de busto, ordenada por su médico tratante para enfrentar el malestar que la aqueja (*gigantomastia + déficit funcional dorso lumbar*), en razón a que se trata de un servicio de salud no contemplado por el Plan Obligatorio de Salud, POS. Famisanar EPS considera que no ha vulnerado los derechos de la accionante con base en tres razones. Primero, porque se trata de un servicio que “no se encuentra incluido

dentro de las coberturas del Plan Obligatorio de Salud, de conformidad con la Resolución 5261 de 1994”. Segundo, porque “no se puede atribuir, que el dolor de espalda que manifiesta tener adolezca al tamaño de su busto, suele suceder que estos dolores se dan por aspectos multifactoriales que para el caso concreto de la accionante puede ser por malos hábitos posturales en su sitio de trabajo o su exceso de peso”. Y tercero, porque no está probada la incapacidad económica de la accionante para asumir el costo del procedimiento excluido del POS. Famisanar solicitó que en caso de ser condenada a garantizar la práctica de la cirugía se le reconociera la posibilidad de recobrar ante el Fosyga. El juez de instancia negó la acción de tutela por considerar que la accionante no acredita su incapacidad económica para sufragar la cirugía mencionada, ni en el escrito de solicitud de tutela, ni durante el trámite de la acción, y porque no era claro para la EPS, según su intervención en el proceso, el origen del malestar de la accionante y, por tanto, que el servicio de salud en cuestión era realmente requerido por ella.

5.1.2.2. El primer aspecto que corresponde a esta Sala resaltar, es que el servicio de salud requerido por la accionante, incluso en el momento en que fue solicitado, sí se encontraba incluido en el plan obligatorio al que ella tiene derecho, contrario a lo afirmado por Famisanar EPS y a lo aceptado por el juez de instancia. En efecto, para el mes de diciembre de 2005 llevaba varios meses en vigencia el Acuerdo 289 de 2005 del Consejo Nacional de Seguridad Social en Salud, *por medio del cual se aclara la cobertura de servicios en el Plan Obligatorio de Salud del Régimen Contributivo y del Régimen Subsidiado*, de 28 de marzo de ese año. El CNSSS acordó en esta ocasión, básicamente, que

*‘en los Planes Obligatorios de Salud del Régimen Contributivo y del Régimen Subsidiado están incluidos los procedimientos de Cirugía Plástica, Maxilofacial y de otras especialidades descritas en la Resolución 5261 de 1994, que se relacionan a continuación, siempre que tengan fines reconstructivos funcionales en los términos expuestos en el presente Acuerdo.*

· *Cirugías Reparadoras de Seno*

· *Tratamiento para paladar hendido y labio fisurado*

· *Tratamiento para gran quemado’*

Se trata pues, de un típico caso en el que una entidad, bien sea porque desconoce la regulación vigente, bien sea porque estratégicamente actúa como si no la conociera, se niega a autorizar la prestación de un servicio que alguien *requiere*, por considerar que no está incluido en el plan obligatorio de salud y que, por tanto, no está obligado a brindarlo. Al tratarse de un servicio que sí está en el plan, obstaculizar su acceso es un claro *irrespeto* al derecho a la salud de la persona que lo requiera. Adicionalmente, en caso de que la posición de la EPS logrará salir triunfante, está, seguramente, intentaría repetir

contra el Fosyga por el valor del tratamiento (dentro del proceso Famisanar EPS solicita expresamente que se reconozca el derecho de recobro que le asiste, en caso de ser obligada a garantizar la prestación del servicio requerido por la accionante). Esto quiere decir que la EPS hubiese podido tener la posibilidad de que se le pagara algo no debido, usando para ello los recursos del Fondo de solidaridad, es decir, afectando los recursos para garantizar el goce efectivo del derecho a la salud de los más necesitados. En todo caso, como ya se dijo, el hecho de que el servicio no se encuentre incluido dentro del plan obligatorio, no es razón suficiente, en ningún caso, para negar servicios de salud que se *requieran con necesidad*.

5.1.2.3. Este caso pone de presente las barreras que para el acceso a un servicio de salud que se requiere, pueden derivarse de las incertidumbres en torno a los contenidos y exclusiones del plan obligatorio de servicios de salud. Posteriormente la Sala analizará esta cuestión (*ver apartado 6.1.1.1.*), así como las medidas que se adoptarán al respecto (*ver apartado 6.1.1.2.*).

5.1.2.4. Ahora bien, durante el proceso, la Sala solicitó a la entidad que justificara su negativa para autorizar el servicio de salud requerido, teniendo en cuenta que sí se encontraba incluido en el plan obligatorio de servicios, en virtud del Acuerdo 289 de 2005 del CNSSS. En su respuesta, la EPS manifestó que a su juicio, el servicio no se debía considerar incluido, por cuanto no se había demostrado que realmente se requiriera y no fuera, por tanto, un tratamiento estético, excluido de los planes obligatorios de servicios. En tal sentido, la EPS centró su negativa a autorizar el servicio de salud, en la incertidumbre científica con relación a si el servicio se requería o no. En consecuencia, luego de recibir algunas pruebas de la accionante probando su incapacidad económica para asumir el costo del tratamiento por su propia cuenta, mediante auto de diciembre 1° de 2006, la Sala de Revisión resolvió como medida cautelar, ordenar a Famisanar EPS que, si aún no lo había hecho, en el término de 48 horas valorara interdisciplinariamente el estado de salud de la accionante —Angélica María Rojas Castrillón—, incluyendo especialistas en *ginecología* y *ortopedia*, para agotar las opciones de tratamiento de la afección de salud que la aqueja en su espalda, de acuerdo con lo dispuesto por la Médico Coordinadora de Alto Costo y Soporte Legal de Famisanar EPS. Se indicó que la valoración de la paciente debía hacerse cuanto antes, fijando como límite máximo, dos meses. La Sala advirtió que en caso de que el tratamiento ordenado por los médicos fuera la cirugía de *mamoplastia*, se entendiera que se trata de un servicio de salud que se requería médicamente no estético, y por tanto, incluido en el POS. La Sala advirtió categóricamente que, en cualquier caso, Famisanar EPS debía adoptar las medidas necesarias para garantizar la prestación del servicio, 48 horas después de que ser ordenado por él o los médicos tratantes.

5.1.2.5. En conclusión, la Sala considera que Famisanar EPS violó el derecho fundamental a la salud de la accionante, al negarle el acceso a un servicio de salud que puede *requerir* una persona, contemplado en el plan obligatorio de servicios, sin tomar las medidas adecuadas y necesarias para establecer si la

persona realmente lo requería o no desde el punto de vista médico. La EPS fundó su decisión con base en tres razones, a saber, que el servicio (i) no está incluido en los planes obligatorios, (ii) no se ha determinado médicamente si se requiere o no y (iii) que la accionante no demostró su incapacidad económica.

(i) Si se aceptara, en gracia de discusión que el servicio en cuestión no estaba incluido dentro del plan obligatorio de salud, en todo caso, como se indicó, toda persona tiene el derecho fundamental a acceder a los servicios de salud que *requiera con necesidad* (ver apartado 4.4.3.); el hecho de que el servicio que se *requiera* no se encuentre en un plan obligatorio, no es razón suficiente para negar la autorización del mismo. En el presente caso Famisanar EPS da otras razones, además de ésta, por lo que es necesario analizarlas. Ahora bien, como se puso de presente, en la medida en que el servicio de salud en caso de *requerirse* no tendría un carácter estético, no sería un servicio excluido del plan obligatorio de servicios y, de acuerdo con la regulación, se ha de entender incluido.

(ii) Como se indicó, se considera que un servicio de salud se *requiere* cuando lo ha ordenado el médico tratante (ver apartado 4.4.2.), lo cual, en el presente caso, supone que la entidad no desconoce el derecho en cuestión por cuanto el médico tratante no ha ordenado el servicio. No obstante, si bien es cierto que no hay claridad con relación a que se requiera, también lo es que tampoco existe certeza con relación a que no se requiera. Se sabe que la paciente sufre fuertes dolores en su espalda, afectando gravemente su integridad, y se sabe que existe la posibilidad de que para enfrentar esta situación pueda requerir el servicio de salud que ella alega requerir, posición que ya fue respaldada por un médico externo. Ante esta situación de incertidumbre, la entidad no puede optar, sencillamente, por desconocer el concepto de un médico externo y negar el acceso al servicio de salud solicitado, sino que debe adoptar las medidas adecuadas y necesarias para que se practiquen las pruebas diagnósticas que permitan establecer, finalmente, si efectivamente se requiere el servicio de salud en cuestión (ver apartado 4.4.2.). Además, como se indicó, el derecho a acceder a los servicios de salud que se *requieren*, supone el derecho al examen diagnóstico que permita establecer si se requiere o no un servicio (ver apartado 4.4.2.). Así, pues, Famisanar EPS debió adoptar las medidas adecuadas y necesarias para superar la incertidumbre y obtener una opinión médica al respecto, debidamente fundada, proveniente de sus médicos adscritos.

(iii) Finalmente, de acuerdo con la jurisprudencia constitucional expuesta, si una persona alega que requiere un servicio *con necesidad* –en tanto no está contemplado por los planes obligatorios de salud, y carece de los recursos para costéárselo por sí misma– la entidad encargada de asegurar la prestación del servicio tiene la obligación de autorizarlo, garantizando el acceso a éste, salvo que demuestre que la persona sí cuenta con los recursos para asumir el costo del servicio. En el presente caso Famisanar EPS se limitó a señalar simplemente que la persona alega no contar con los medios

económicos para asumir el costo del tratamiento, a pesar de que cuenta con los medios probatorios verificar si tal afirmación es cierta. En todo caso, como se trata de un servicio de salud no excluido del plan obligatorio, en caso de que se *‘requiera’*, no está sometido a pago alguno, y en consecuencia es un asunto irrelevante para la resolución del presente caso. Así pues, la Sala resolverá tutelar el derecho a la salud del accionante y confirmará las medidas cautelares ordenadas dentro de este caso.

En conclusión, la Sala revocará la decisión de instancia adoptada dentro de este proceso y tutelaré, en consecuencia, el derecho a la salud de la accionante. Teniendo en cuenta la medida cautelar que se dispuso en el presente caso, para garantizar a la accionante el acceso a un adecuado diagnóstico y a los servicios que se determinara que ella requiere, la Sala se limitará a confirmar lo dispuesto en dicha medida.

#### *5.1.3. Expediente T-1328235 (acceso a servicios de salud no incluidos en el POS –medicamentos para diabetes–, solicitud ante el Comité Técnico Científico)*

5.1.3.1. En este caso se plantea el mismo problema sobre acceso a un servicio de salud no incluido en el plan obligatorio de salud, que se requiere con necesidad, pero con una variante. En esta ocasión la entidad no niega tener el deber de considerar la petición del servicio que supuestamente requiere la accionante, pero alega que no puede tramitarla hasta tanto la propia persona presente la solicitud ante el Comité Técnico Científico.

En efecto, María Diva Almonacid de Martínez, de 73 años de edad, interpuso acción de tutela en contra de Colmédica EPS, por considerar que la entidad le viola sus derechos a la vida y a la salud, al negarse a garantizar el suministro del medicamento *Gabapantin* 2800mg, además de las tiras reactivas para glucosa en sangre, precisión Plus Electrones y jeringas para la aplicación de la insulina; todos éstos, servicios de salud para las afecciones que padece (*‘diabetes mellitas y neuropatía diabética’*). Colmédica EPS solicitó al Juez declarar improcedente la acción de tutela, porque no se agotaron los procedimientos legales establecidos, pues “(...) el accionante no ha solicitado a través de su médico tratante, a la EPS el suministro del medicamento *Gabapentin*, como tampoco se agotó el mecanismo legal de CTC de medicamentos, y sí se acudió a la acción de tutela sin agotar los procedimientos previos existentes y determinados por el mismo Estado para la autorización de tales servicios.” El juez de instancia resolvió denegar la acción de tutela porque consideró que cuando se necesitan medicamentos no incluidos en el POS, se debe presentar el caso ante el Comité Técnico Científico de la EPS; “(...) *sólo cuando el Comité haya negado la autorización para el servicio, [se puede] hacer uso de la acción de tutela (...)*”.

5.1.3.2. Durante el proceso el Ministerio de la Protección Social, por medio de la Oficina Asesora Jurídica y de Apoyo al Legislativo, solicitó que se negara la

acción de tutela por existir otro procedimiento para reclamar el medicamento. Señaló el Ministerio en su intervención,

*“Por encontrarse los medicamentos enunciados excluidos del listado, corresponde al accionante a través de su médico tratante tratar de agotar el procedimiento señalado en el Artículo 8 del Acuerdo 228 de 2002, el cual consagra que para la autorización de medicamentos excluidos del listado debe procederse a presentar el caso por parte del médico tratante ante el Comité Técnico Científico de la respectiva EPS, quien determina la viabilidad del mismo. En el evento de ser negados por éste se deberá insistir, allegando los soportes médicos y técnicos atinentes a la necesidad esencial de los mismos para el bienestar de la salud del accionante.”*

Tal posición fue reiterada por Colmédica EPS que remitió una comunicación a la Corte Constitucional en la que señaló que la accionante pretendía solicitar el servicio sin haber solicitado el tratamiento previamente al Comité Técnico Científico. Luego de hacer algunos análisis sobre la regulación del Sistema de Salud referente al asunto tratado, Colmédica EPS solicitó a la Corte Constitucional que si le ordenaba prestar el servicio ordenado a la paciente, se hiciera una declaración explícita con relación al derecho de la EPS para repetir contra el Fosyga.

5.1.3.3. Como lo ha señalado la jurisprudencia constitucional, corresponde al médico tratante solicitar al Comité Técnico Científico la autorización de los servicios de salud no incluidos dentro del plan obligatorio de salud respectivo, es decir, realizar un trámite al interior del Sistema de Salud (*ver apartado 4.4.4.*). Una EPS viola el derecho a la salud de una persona, cuando se le niega el acceso al servicio con base en el argumento de que la persona no ha presentado la solicitud al Comité. Para la Corte *‘las EPS no pueden imponer como requisito de acceso a un servicio de salud el cumplimiento de cargas administrativas propias de la entidad’*. En tal sentido, cuando una EPS niega servicios de salud a una persona que tiene derecho a ellos, porque no realizó un trámite que le corresponde realizar a la propia entidad, *irrespetó* su derecho a la salud, puesto que crea una barrera para acceder al servicio.

5.1.3.4. Es claro entonces que Colmédica EPS *irrespetó* el derecho a la salud de la accionante, por cuanto no se le garantizó el acceso a un servicio que *requería* y no estaba incluido dentro del plan obligatorio de servicios, justificando esta negativa, en el propio incumplimiento de un trámite interno.

5.1.3.5. Por su parte, el Ministerio de la Protección Social desconoce el derecho a la salud de la accionante en dos aspectos. Por una parte, desconoce su obligación de *proteger* el derecho a la salud de la accionante, impidiendo que Colmédica EPS desconozca la obligación antes mencionada. El Estado, a través del Ministerio en este caso, ha debido adoptar las medidas adecuadas y necesarias una vez tuvo noticia del caso, para proteger el derecho de la

accionante y evitar que se siga violando.

Pero el Ministerio de la Protección Social no sólo viola el derecho a la salud por omitir las acciones de protección a una persona de la tercera edad –sujeto de especial protección constitucional–, sino también porque adopta acciones de carácter positivo que constituyen una segunda violación al derecho. En efecto, el Ministerio resolvió remitir una carta al juez de tutela avalando el acto contrario a la Constitución de la EPS, apoyando así la tesis según la cual se puede negar a un paciente un servicio de salud porque éste no ha llevado a cabo trámites que corresponde adelantar de manera interna –entre el médico tratante y el Comité Técnico Científico- a las entidades encargadas de asegurar o prestar dicho servicio.

5.1.3.6. En consecuencia, la Sala resolverá revocar el fallo de instancia y tutelar el derecho a la salud de la accionante. En la medida en que la Sala ya tuvo noticia de que la prestación del servicio se le garantizó al accionante, se limitará a confirmar la orden dispuesta en la medida cautelar adoptada dentro del proceso de la referencia.

5.1.4. *Expediente T-1335279 (acceso a servicios de salud –exámenes diagnósticos– de persona vinculada al Sistema de salud)*

5.1.4.1. En este proceso, la Personera Distrital Delegada en Derechos Humanos en Cartagena, Nasly Sánchez Zapatero, interpuso acción de tutela en nombre de Jessica Marín Peluffo contra el Departamento Administrativo Distrital de Salud, DADIS, por desconocer sus derechos a la vida y a la salud, al negarse a realizar los exámenes *ecocardiograma doppler*, *electrocardiografía*, *frotis* y *cultivo de la garganta* y a conceder una cita con un especialista (cardiólogo), por “falta de contratos”. La joven Marín Peluffo (20 años de edad), padece *faringitis* y *prolapsa mitral*, enfermedad que ha puesto en peligro su vida; no cuenta con seguridad social y se encuentra en el Nivel 1 del Sisben. Solicita que se garantice su acceso a los servicios de salud que requiere. El juez de instancia negó la acción de tutela por considerar que de las pruebas aportadas al expediente no se puede constatar que la vida de la accionante esté en riesgo. La juez citó a Jessica Marín Peluffo para rendir una declaración juramentada dentro del proceso, pero ella no compareció.

5.1.4.2. El DADIS irrespeta el derecho a la salud de la joven accionante, vinculada al Sistema de Salud, por cuanto no ha tomado las medidas correspondientes para garantizar el acceso a un servicio de salud requerido con necesidad (*ver apartado 4.4.3.*). La entidad acusada ha debido, por lo menos, (1) suministrar la *información* que requería para saber cómo funciona el sistema de salud y cuáles son sus derechos, (2) *indicar* específicamente cuál era la institución prestadora de servicios de salud que tiene la obligación de realizar las pruebas diagnósticas que *requiere* y una cita con un especialista, y (3) *acompañarla* durante el proceso de solicitud del servicio, con el fin de asegurar el goce efectivo de sus derechos (*ver sección 4.3.*).

Como se indicó, el derecho a acceder a los servicios de salud, supone el derecho al examen diagnóstico que permita establecer si se requiere o no un servicio (*ver apartado 4.4.2.*). Es claro para la Sala, que en el presente caso el DADIS desconoció abiertamente el derecho a la salud de una persona (una joven) al haberle obstaculizado e impedido su acceso a las pruebas diagnósticas ordenadas. El DADIS carecía de contratos con entidades que practicasen el servicio requerido, y, a pesar de ese estado de cosas, no tomó las acciones adecuadas y necesarias para informar, indicar y acompañar a la joven defendida por la personera distrital, y asegurar su acceso al servicio. El incumplimiento de la entidad territorial responsable de asegurar la prestación del servicio en este caso, que nunca fue justificado o argumentado en el proceso, conlleva un *irrespeto* al derecho a la salud de la paciente. La demora en la determinación del diagnóstico puede conducir a un deterioro mayor en su salud. En consecuencia, la Sala resolverá tutelar el derecho de la joven defendida por la Personera y confirmará las medidas cautelares ordenadas dentro del proceso.

5.1.4.3. En consecuencia, se revocará la sentencia de instancia, se tutelaré el derecho a la salud, y se confirmará y dejaré en firme la medida cautelar que se dispuso dentro del proceso al DADIS, para que *informara, indicara y acompañara* a la beneficiaria de la acción.

5.1.5. *Expediente T-1337845 (acceso a servicio de salud no incluido dentro del POSS – resonancia magnética de la columna –)*

5.1.5.1. Olga Patricia Palacio Villa interpuso acción de tutela en contra ECOOPSOS, Entidad Cooperativa Solidaria de Salud, por considerar que se le viola su derecho a la seguridad social en conexidad con el derecho a la vida, al no autorizar el examen de *resonancia magnética de la columna*, ordenado por su médico tratante, por considerarlo necesario para definir el tratamiento que ella requiere en razón a la *hernia de columna lumbisacra* que padece y al cáncer de mama que se le viene tratando. La entidad negó el servicio solicitado porque no se encuentra contemplado dentro del Plan Obligatorio de Salud del régimen subsidiado, POSS, y porque la accionante ya no está afiliada a esa entidad y al régimen subsidiado de salud, debido a que pasó del Nivel 2 del SISBEN al Nivel 3. El juez de instancia negó la tutela, por considerar que la entidad acusada no tiene la obligación de garantizar el acceso a los servicios de salud que requiera la accionante, por cuanto no es una de sus beneficiarias.

5.1.5.2. La Sala considera que ECOOPSOS vulneró el derecho a la salud de la accionante, al no brindarle los servicios que ella requería, para en la prestación de los servicios de salud enfrentar una enfermedad catastrófica, violando el principio de continuidad. Considera la Sala que la Secretaría de Salud de Antioquia también lo *irrespetó*, por cuanto adoptó decisiones administrativas que implicaron dejar sin afiliación a la accionante, de forma tal que se le impuso una barrera para acceder al servicio de salud requerido. Como se dijo, el derecho a acceder a los servicios de salud que se *requieran*, supone el

derecho al examen diagnóstico que permita establecer si se requiere o no un servicio (*ver apartado 4.4.2.*). En tal medida, el que ni la entidad territorial respectiva, ni la entidad de la que era beneficiaria – ECOOPSOS– le hubieran asegurado el acceso a las pruebas diagnósticas requeridas ni hubieran *informado, indicado o acompañado* a la accionante, conlleva un claro *irrespeto* a su derecho a la salud. Además, de acuerdo con la jurisprudencia constitucional, *el acceso a un servicio de salud debe ser continuo, no puede ser interrumpido súbitamente*. Irrespeto el derecho a la salud una EPS que suspenda el suministro de un tratamiento médico que se requiera, *antes de que éste haya sido efectivamente asumido por otro prestador* (*ver apartado 4.4.6.4.*). Además, toda persona tiene el derecho fundamental a acceder efectivamente a los servicios de salud que se requieran para enfermedades ruinosas o catastróficas, sin discriminación alguna, por lo que *‘bajo ningún pretexto’* se les podrá negar el acceso, por lo que el desconocimiento del principio de continuidad en este caso es aún más grave.

Finalmente, toda persona tiene derecho a que los trámites que adelante se sigan de acuerdo con el debido proceso, y sin generar consecuencias gravosas para las personas, como por ejemplo, obstaculizar su acceso a los servicios de salud, al desafiliarlas sin seguir los pasos para ello de la entidad de salud encargada de asegurarles la prestación de éstos (*ver apartado 4.4.6.3.*). En el presente caso, los trámites que había realizado la Dirección Seccional de Salud de Antioquia y que habían llevado a que la accionante hubiera sido desafiliada de la EPS del régimen subsidiado de la cual era beneficiaria, constituyeron un *irrespeto* al derecho a la salud de la accionante, por cuanto le impuso así la entidad encargada de asegurar la prestación del servicio, una barrera al acceso a los servicios de salud que venía recibiendo. La decisión adoptada desconoció el debido proceso y la buena fe con que se deben adelantar los trámites en el Sistema de Salud.

5.1.5.3. En consecuencia, la Sala considera que ECOOPSOS *irrespetó* el derecho a la salud de la accionante, la negarse a practicar un servicio de salud que requería (*resonancia magnética de la columna*), porque éste no se encontraba dentro del plan obligatorio de servicios. No obstante, no se impartirá orden alguna, por cuanto la nueva entidad encargada de garantizar la prestación del servicio ya lo hizo. El 13 de diciembre de 2006, el Gerente Seccional COORSALUD-COHAN informó que ya se había dado cumplimiento a lo dispuesto en la medida cautelar impartida. La Sala se limitará a confirmar y dejar en firme las medidas cautelares dispuestas dentro de este proceso.

5.1.6. *Expediente T-1338650 (medios necesarios para que una persona vinculada acceda a un servicio de salud –trasplante de tráquea– en lugar distinto a su domicilio)*

5.1.6.1. En este caso, Mario Reyes Acevedo, quien se encuentra en el Nivel 1 del SISBEN, interpuso acción de tutela en contra de la Secretaría de Salud del Departamento del Cesar por considerar que le viola sus derechos a la vida y a

la salud al imponérsele la carga de costearse su estadía en la *casa de recuperación* de Medellín, en donde se encuentra esperando a que aparezca un donante de tráquea, para, de inmediato, programar la cirugía. La difícil situación de salud del accionante, que sólo estaba siendo atendida en cumplimiento de una acción de tutela, implicaba la imposibilidad de acceder al servicio de salud requerido, si no se aseguraba los gastos de manutención que la persona no podía costearse por sí misma. La Secretaría de Salud Departamental de Valledupar por su parte, alegó no tener la obligación que el accionante le exige. El juez de primera instancia concedió la tutela, porque consideró que la entidad territorial encargada de garantizar la prestación del servicio, no podía dejar abandonada a la persona en otra ciudad, sabiendo que esta carecía de los recursos para estar allí. Posteriormente, en segunda instancia, el Tribunal Superior de Medellín resolvió revocar la decisión de primera instancia, por considerar que exigía el cumplimiento de una obligación que no existe reglamentariamente.

5.1.6.2. De acuerdo con la jurisprudencia, toda persona tiene derecho a que se remuevan las barreras y obstáculos que impidan a una persona acceder a los servicios de salud que *requiere con necesidad*, cuando éstas implican el desplazamiento a un lugar distinto al de residencia, debido a que en su territorio no existen instituciones en capacidad de prestarlo, y la persona no puede asumir los costos de dicho traslado (*ver apartado 4.4.6.2.*). En tal sentido la Sala de Revisión dispuso como medida cautelar, ordenar a la Secretaría de Salud del Departamento del Cesar, que dentro de las 48 horas siguientes, brindara al señor Mario Reyes Acevedo los medios económicos suficientes o realizar acuerdos con entidades públicas o privadas de la ciudad de Medellín, para costear su traslado y manutención, con el objeto de que continuara recibiendo el tratamiento que requiere en el Hospital Universitario San Vicente de Paúl. Se ordenó remitir copia de la decisión al Hospital. La encargada del Hogar de Recuperación *San Antonio*, Silvia María Caro Úsuga, informó que el paciente ya había sido intervenido y que actualmente se encontraba en estado de recuperación.

Luego de ser requerida por la Sala de Revisión, la Secretaría de Salud del Departamento del Cesar, remitió una comunicación al Despacho informando el cumplimiento de la medida cautelar.

5.1.6.3. En conclusión, la Secretaría de Salud del Departamento del Cesar *irrespetó* el derecho a la salud del accionante, por cuanto le impuso una barrera al acceso al servicio de salud *requerido con necesidad*, al no proveerle los medios para acceder al mismo, pese a saber que la condición económica de la persona hacía imposible que él lo hiciera por sí mismo. Sin embargo, en lugar de encontrar en la administración departamental una dependencia encargada de *respetar, proteger y proveer* su derecho a la salud, se ha encontrado con una entidad que de manera frecuente y reiterada ha desconocido su derecho a la salud. De hecho, ha podido acceder al servicio de salud que requiere, porque un juez de tutela obligó a la Secretaría de Salud del Departamento del Cesar a *respetar* el derecho a la salud del accionante. Por

tanto, tutelaré el derecho a la salud del accionante y, en consecuencia, dejaré en firme la orden que se dispuso como medida cautelar.

*5.1.7. Ausencia de reglamentación para autorizar oportuna y prontamente los servicios médicos distintos a medicamentos no excluidos, que se requieran y no estén incluidos en el plan obligatorio de salud aplicable*

En los casos anteriores se constata que las EPS aducen que la intervención del juez de tutela es necesaria ante la existencia de vacíos en la regulación.

La ausencia de una reglamentación para que las EPS puedan autorizar los servicios de salud, distintos a medicamentos no incluidos, que las personas requieran con necesidad, incluso cuando se trata de menores de edad, es un obstáculo para el acceso a los servicios que hasta la fecha sólo puede ser superado mediante la acción de tutela (*ver apartado 4.4.3.*). Por eso, en este tipo de casos las EPS suelen negar el servicio de salud requerido, y luego esperan –e incluso sugieren que las personas demanden a la entidad para poder autorizar el servicio, una vez cuenten con la posibilidad de recobrar lo ordenado con base en una orden judicial. Por eso, las EPS participan en el proceso de tutela, como ocurre en este caso, para indicar básicamente dos cosas: (i) que no se puede entender que la entidad viole los derechos a la salud de las personas que requieren servicios de salud con necesidad (servicios no contemplados dentro del POS) al no autorizarlos, puesto que sus actuaciones se enmarcan dentro de una regulación que omite el procedimiento para que se tramiten este tipo de solicitudes; y (ii) que teniendo en cuenta la reiterada jurisprudencia constitucional, en la cual se advierte que las personas tienen el derecho constitucional a acceder a los servicios de salud que *requieran con necesidad*, la EPS solicita al juez la posibilidad de recobrar ante el Estado, el costo de los servicios que no le corresponda asumir en virtud de la regulación, con cargo a los dineros que aseguran el acceso a los servicios presupuestados por los planes obligatorios.

En otras palabras, ante la *laguna* que existe en la regulación para poder garantizar a una persona el acceso a servicios de salud que se requieran con necesidad, distintos a medicamentos no incluidos del plan obligatorio, en la práctica, las EPS suelen obstaculizar el acceso al derecho fundamental a la salud de las personas, hasta tanto un juez constitucional no les garantice expresamente que podrán recobrar ante el Fosyga. Así pues, es claro que la *laguna* regulativa existente se constituye, en sí misma, en una barrera al acceso a los servicios de salud. Este asunto estructural será abordado posteriormente por esta Sala, con el objeto de impartir una orden al respecto [*ver apartado 6.1.4.*].

## **5.2. Los pagos moderadores no pueden ser una barrera que dificulte, postergue o impida el acceso a los servicios de salud que se *requieran***

5.2.1. El segundo de los problemas jurídicos concretos analizados en el presente caso es el siguiente: ¿Desconoce el derecho a la salud de una persona

la entidad que no le autoriza el acceso a un servicio de salud que aquella requiere, hasta tanto no cancele el pago moderador que corresponda reglamentariamente, incluso si la persona carece de la capacidad económica para sufragarlo? De acuerdo con la jurisprudencia constitucional, una entidad encargada de garantizar la prestación de los servicios de salud a una persona, *irrespeto* su derecho a acceder a éstos, si le exige como condición previa que cancele un pago moderador al que haya lugar en virtud de la reglamentación, cuando el servicio se *requiere*. La entidad tiene todo el derecho a que le sean pagadas las sumas de dinero a que haya lugar, pero no a costa del goce efectivo del derecho a la salud de una persona. *Los pagos moderadores no pueden constituir barreras al acceso a los servicios de salud* (ver apartado 4.4.5.1.).

5.2.2. En el caso que se estudia en el expediente T-1289660 (*acceso a servicio de salud incluido en el POS, sometido a pagos moderadores –coronariografía con cateterismo izquierdo y ventriculografía–*), se estudia la acción de tutela de Marlene Betancourt Mosquera (46 años) contra SaludCoop EPS por considerar que esta entidad desconoció sus derechos a la vida y a la salud, al negarse a autorizar la práctica de un servicio de salud incluido en el POS que ella requiere (*coronariografía con cateterismo izquierdo y ventriculografía*) debido a que no ha cancelado el pago moderador correspondiente –un copago equivalente al 11.5% del costo del servicio–. El copago lo justifica la EPS en el hecho de que el esposo de la accionante, el afiliado al sistema, sólo ha cotizado 86 semanas, de las 100 que se exigen para aquellas consideradas catastróficas, según el artículo 61 del Decreto 806 de 1998. La accionante, por su parte, requiere el servicio *con necesidad*, es decir, no se lo puede costear por sí misma. El juez de instancia decidió que la EPS no había violado el derecho a la salud de la accionante, por cuanto, se había limitado a exigir lo que a su juicio era un ‘requisito’ para poder acceder al servicio.

De acuerdo con la jurisprudencia, es claro que SaludCoop EPS *irrespetó* el derecho a la salud de la accionante, por cuanto le obstaculizó el acceso a un servicio que ella *requería con necesidad* (*coronariografía con cateterismo izquierdo y ventriculografía*), como medio para presionarla y asegurar que cancelara el pago moderador correspondiente (ver apartado 4.4.5.1.). El *irrespeto* del derecho fue claramente corroborado por el Ministerio de la Protección Social.

Ahora bien, teniendo en cuenta que ‘*no habrá períodos mínimos de cotización o períodos de carencia superiores a 26 semanas en el Régimen Contributivo*’ (lit, g, art. 14, Ley 1122 de 2007), un caso como éstos, en el futuro no se debe repetir.

5.2.3. Adicionalmente, el servicio requerido, es un examen diagnóstico, indispensable para definir posteriormente el manejo quirúrgico apropiado para su enfermedad. Por lo tanto, se trata de un servicio de salud especialmente reconocido y tutelado por la jurisprudencia constitucional, como se indicó previamente (ver apartado 4.4.2.), razón de más para tutelar el servicio en

cuestión.

5.2.4. La Sala, considerando el riesgo existente para la salud de la accionante, certificado por su médico tratante y por el Instituto Nacional de Medicina Legal y Ciencias Forenses, en el trámite ante el juez de primera instancia, dispuso una medida cautelar orientada a proteger los derechos a la vida y a la salud de la tutelante. Se ordenó a Saludcoop EPS autorizar la práctica del servicio de salud requerido, en el término de 48 horas, advirtiéndole que no se indicaba quién es el responsable de asumir el costo del mismo. El 4 de mayo de 2006, Saludcoop EPS informó a la Corte Constitucional que el procedimiento ya le había sido practicado a la accionante.

5.2.5. La Sala considera que en el presente caso el derecho a la salud de la accionante fue violado por SaludCoop EPS. Como se indicó previamente, los pagos moderadores no pueden constituirse en barreras de acceso a los servicios de salud a los más pobres (*ver apartado 4.4.5.*). No obstante, como en el caso de la referencia la violación del derecho ya cesó, lo que procede en el presente caso es revocar la decisión judicial de instancia, tutelar el derecho a la salud de la accionante y confirmar y dejar en firme las medidas cautelares adoptadas dentro del proceso.

5.2.6. Ahora bien, además de proferir la medida cautelar, la Sala solicitó información al Ministerio de la Protección Social y a la Superintendencia Nacional de Salud, acerca de si el padecimiento sufrido por la accionante ha de entenderse como una enfermedad catastrófica y acerca de si tal clasificación autoriza a la EPS a condicionar la autorización del servicio de salud requerido, a que se hubiera cancelado un copago, por tratarse de una enfermedad padecida por una persona beneficiaria de alguien que había cotizado 86 de las 100 semanas exigidas como periodo mínimo. La Corte también indagó acerca de los mecanismos existentes para resolver los conflictos que se presentan en estos casos, así como las formas de financiamiento con las que cuentan las personas que carecen de capacidad económica para realizar los pagos correspondientes.

Las respuestas que aportaron el Ministerio y la Superintendencia son indicativas de los problemas estructurales que padece el sistema de salud. En especial, evidencia las incertidumbres a las que se enfrentan los distintos actores del sector, que se traducen en claras barreras al goce efectivo del derecho a la salud. En efecto, mientras que el Ministerio de la Protección Social, en contravía de la jurisprudencia constitucional, considera que SaludCoop EPS no ha violado el derecho a la salud de la accionante y que ha actuado dentro de los parámetros normativos vigentes, la Superintendencia Nacional de Salud, de acuerdo con la Constitución, la Ley y la jurisprudencia en la materia, considera que existe una grosera y ostensible violación del derecho a la salud de la accionante.

5.2.6.1. Mediante escrito del 16 de junio de 2006, el Ministerio de la Protección Social respondió las cuestiones propuestas. En cuanto al carácter

catastrófico de la enfermedad que padece la accionante, el Ministerio indicó que esta clasificación no es taxativa, por lo que el Sistema no cuenta con un listado de este tipo de afecciones. En relación con los mecanismos al alcance de las personas para acceder a los servicios de salud que requieren para preservar su vida o su integridad personal, cuando se les exige un copago que no tienen la capacidad económica de efectuar, dijo que ‘no hay ninguna disposición legal que exima del pago’. A su juicio, se trata de una barrera de acceso al servicio insuperable, incluso, si conlleva una discriminación en contra de las personas con escasos recursos. Por último, en cuanto al mecanismo para financiar los pagos que les corresponda hacer al sistema de salud, el Ministerio indicó que éste era el previsto en el artículo 13 del Acuerdo 260 de 2004 del CNSSS.

5.2.6.2. Mediante escrito del 27 de junio de 2006, la Superintendencia Nacional de Salud respondió las cuestiones propuestas. En cuanto al carácter catastrófico de la enfermedad que padece la accionante, la Superintendencia indicó que “(...) según el artículo 61 del Decreto 806 de 1998, el tratamiento de las enfermedades definidas como catastróficas o ruinosas de nivel IV en el POS, es decir, aquellas señaladas en el artículo 117 del MAPIPOS (Resolución 5261 de 1994), requieren de periodos mínimos de cotización. Por su parte, el artículo 115 de la resolución mencionada indica que la coronariografía, incluyendo cateterismo izquierdo y ventriculografía, es un procedimiento de nivel III. De esta forma, se tiene que el mecanismo diagnóstico referido no está sujeto a periodos mínimos de cotización ni puede ser considerado dentro de las enfermedades catastróficas o ruinosas.” Teniendo en cuenta la Ley 972 de 1995, en especial su artículo 3°, y dando aplicación a la cláusula *pro homine*, la Superintendencia Nacional de Salud considera que “(...) respecto de las enfermedades ruinosas y catastróficas allí mencionadas se hace explícita la integralidad en el tratamiento de las mismas.” Finalmente, en cuanto a los mecanismos legales y de financiamiento con los que cuenta una persona que se encuentra en las mismas condiciones de la accionante, la Superintendencia indicó que los copagos no pueden convertirse en ‘*barreras para acceder al servicio*’.

5.2.6.3. El problema jurídico planteado por el caso analizado en este aparte de la sentencia, está relacionado con dos problemas estructurales que serán analizados y resueltos posteriormente. Por una parte, la incertidumbre con relación a cuáles son los servicios de salud específicos que se encuentran incluidos en el plan obligatorio, y deben ser garantizados sin discusión alguna cuando se requieran (*ver apartado 6.1.1.1.*), con la consecuente necesidad de adoptar medidas para superar dicha incertidumbre (*ver apartado 6.1.1.2.*).

### **5.3. Protección especial del derecho a acceder a los servicios de salud de las niñas y los niños.**

El tercero de los problemas jurídicos que plantean los casos acumulados en el presente proceso, es el siguiente: ¿Desconoce el derecho a la salud, una entidad encargada de garantizar la prestación de los servicios requeridos,

cuando no la autoriza a un niño o una niña un servicio que requiere y sus responsables no lo pueden costear, por el hecho de que no se encuentra incluido en el plan obligatorio de salud o porque la vida o la integridad personal del menor no dependen de la prestación del servicio? La respuesta a esta cuestión, como se dijo, es afirmativa. El derecho a la salud se viola especialmente, cuando el *servicio requerido con necesidad* es negado a una niña o a un niño, sujetos de especial protección constitucional (ver sección 4.5.).

5.3.1. En el expediente T-1281247 (*acceso de un menor a un servicio no incluido en el POS –implante coclear–*) se niega el acceso a un menor a un servicio de salud que *requiere* (es indispensable para evitar una grave infección y garantizar se desarrollo armónico e integral) *con necesidad* (sus padres no pueden pagar el costo correspondiente al servicio), alegando, únicamente, que el servicio no está incluido en el plan obligatorio de salud. Claramente la entidad acusada (Salud Colpatria EPS) desconoce el derecho a la salud del hijo del accionante, en especial, por tratarse de un niño, sujeto de especial protección constitucional. En tal sentido se reiterará la jurisprudencia en este caso y se tutelaré el derecho a la salud del menor.

La mayoría de las ocasiones en las que el servicio de salud ‘*implante coclear*’ se ha concedido como parte del derecho a la salud, ha sido en el caso de los niños. En pocas oportunidades no ha sido así. Por ejemplo, en la sentencia T-1138 de 2005 se tuteló el acceso a un implante coclear a una persona dedicada a las ventas ambulantes (55 años, nivel II del sisbén). La Corte consideró que el accionante *requería* el implante por cuanto su audición se estaba perdiendo gravemente desde hacía ya ocho años, con significativos impactos en su capacidad lingüística, y porque los otros posibles servicios de salud alternativos existentes (audífonos), no le servían a su caso. Es decir, el servicio de salud solicitado no podía ser remplazado por otro que permitiera conservar la salud, la dignidad y la integridad personal del accionante (*requería* el servicio), y el accionante no tenía forma de acceder al mismo por sus propios medios (lo requería *con necesidad*).

Los casos en los que una niña o un niño tienen acceso a un implante coclear son mayores, por el hecho de que pueden ‘*requerir*’ el servicio de salud en más ocasiones. Como se indicó (ver sección 4.5.), en el caso del derecho a la salud de los niños, existen ámbitos de protección especiales, derivados de su condición de sujetos de especial protección constitucional. Así pues, su derecho fundamental a la salud no sólo protege el acceso a los servicios que se requieran para conservar la salud, en especial si se encuentra comprometida su vida, su integridad personal o su dignidad. En el caso de los niños y las niñas, su derecho a la salud les garantiza también, por ejemplo, el acceso a los servicios de salud que se *requieran* para lograr ‘*un desarrollo armónico e integral*’ (art. 44, CP). El proceso de desarrollo y crecimiento de los niños y las niñas implica considerar aspectos en los que un determinado servicio de salud puede ser indispensable y significar mejoras enormes, frente a lo que representa el mismo servicio de salud en personas adultas.

Ahora bien, en el presente caso existe un hecho que debe ser resaltado por la Sala de Revisión. El menor contaba con un implante coclear (que le fue puesto en el 2001), pero requería que éste fuera reemplazado, porque existía la posibilidad de que le generara meningitis. Por un lado, ello implica que en el caso concreto el menor no sólo requería el servicio por ser indispensable para su desarrollo armónico e integral, sino también por el hecho de ser necesario para conservar su vida, en sentido estricto. Por otra parte, de acuerdo a la información pública sobre algunos de los audífonos que existen en el mercado, se sabe que el riesgo de producir meningitis se puede derivar de la calidad del implante, y no por problemas adjudicables a la salud del paciente. Las órdenes que serán impartidas en el presente caso se presentarán posteriormente.

#### **5.4. Una entidad encargada de garantizar el derecho a la salud sólo puede desconocer el concepto de un médico reconocido que no está adscrito a su red de prestadores, cuando su posición se funda en razones médicas especializadas sobre el caso en cuestión**

5.4.1. El cuarto problema jurídico concreto es este: ¿desconoce el derecho a la salud de una persona, la entidad encargada de garantizarle la prestación del servicio requerido, cuando éste fue ordenado por un médico que no está adscrito a la entidad respectiva, pero es especialista en la materia? Ahora bien, esta cuestión lleva a una segunda pregunta que se suscita en el caso concreto, teniendo en cuenta de quién se trataba, ¿puede el juez de tutela considerar que la entidad de salud encargada de garantizar la prestación del servicio no violó el derecho de una persona, únicamente por el hecho de que el servicio de salud fue ordenado por un médico no adscrito a la entidad, incluso cuando la entidad nunca lo negó por esa razón, ni se aportaron razones médicas al proceso en tal sentido? Como se indicó (*ver apartado 4.4.2.*), la persona competente para decidir en el Sistema de Salud cuándo *requiere* alguien un servicio de salud es el médico tratante, por estar adscrito a la entidad correspondiente, está capacitado para decidir con base en criterios científicos y por ser quien conoce al paciente. Pero esta regla tiene una excepción cuando (i) existe un concepto de un médico que no está adscrito a la entidad encargada de garantizar la prestación, (ii) que es un profesional reconocido que hace parte del Sistema de Salud y (iii) la entidad no ha desvirtuado dicho concepto, con base en razones científicas que consideren el caso específico del paciente. En estos casos, corresponde a la entidad someter a evaluación médica interna al paciente en cuestión, y si no desvirtúa el concepto del médico externo, entonces atender y cumplir lo que éste prescribió. No obstante, ante un claro incumplimiento, y tratándose de un caso de especial urgencia, el juez de tutela puede ordenar directamente a la entidad encargada que garantice el acceso al servicio de salud ordenado por el médico externo, sin darle oportunidad de que el servicio sea avalado por algún profesional que sí esté adscrito a la entidad respectiva.

5.4.2. En el primero de los expedientes acumulados al presente proceso (T-1281247; *acceso de un menor a un servicio no incluido en el POS – implante coclear–*), los jueces de primera y de segunda instancia resolvieron

negar la acción de tutela interpuesta por la madre de un niño, por considerar que el servicio de salud solicitado (un implante coclear), no había sido ordenado por el médico tratante, sino por un profesional no adscrito a la entidad en cuestión (Salud Colpatria EPS).

La accionante solicitó el servicio de salud ordenado por un médico que hace parte del Sistema de Salud y es un reconocido especialista en el área en que el menor está siendo atendido. Además, se trata de quien había sido el médico tratante del menor desde sus tres años y medio de edad, cuando éste era beneficiario de otra EPS (SOS) distinta a la que tiene en la actualidad (Salud Colpatria EPS). Se trataba pues, de una opinión médica que debía ser considerada especialmente por parte de la nueva EPS, teniendo en cuenta que era el concepto de quien había sido el médico tratante del niño en el Sistema de Salud hasta hacía poco tiempo. Por último, cabe señalar que el concepto que el médico emitió no era referente a un servicio de salud que se requiriera para atender una nueva afección a la salud del menor. No. En el presente caso, el médico se pronunció sobre un tratamiento que se le venía dirigiendo al menor, para atender su deficiencia auditiva. No es una opinión sobre un tema nuevo que el médico desconociera. No obstante, aunque la EPS (Salud Colpatria) obstaculizó el acceso al servicio de salud requerido por el menor, lo hizo por otra razón diferente. La EPS nunca cuestionó la validez o certeza del concepto del médico tratante. De hecho, como se aprecia en el expediente, el concepto era aceptado y considerado válido, precisamente por tratarse de un reconocido especialista en el campo en cuestión que había sido el médico tratante del niño. Es el juez de instancia quien considera, so pretexto de una aplicación mecánica de los parámetros fijados por la jurisprudencia constitucional sobre el acceso a los servicios de salud, que el concepto del especialista que venía tratando al menor desde sus tres años y medio de edad no demostraba que el servicio de salud era *‘requerido’* por el menor. La decisión de los jueces de instancia, valga decir, no se fundó en razones de carácter médico o científico que hubiesen sido allegadas al proceso; se fundó en razones de carácter eminentemente formales, que dejaron de lado el contenido material del concepto médico emitido y el deber constitucional del juez de proteger el goce efectivo del derecho a la salud.

5.4.2.1. La Sala reitera entonces, que se *irrespeta* el derecho a la salud de una persona cuando (i) desconoce el concepto de un médico reconocido y vinculado al Sistema de Salud, (ii) sin ninguna consideración de carácter científico o técnico, (iii) sólo por el hecho de no estar adscrito a la entidad encargada de garantizar la prestación del servicio en cuestión, especialmente, (iv) si la entidad nunca cuestionó la validez o idoneidad del concepto médico.

En este caso, los jueces reconocieron el derecho del menor a ser evaluado, pero cuestionaron el concepto médico que prueba que el servicio se *‘requiere’*, por motivos únicamente formales, no médicos.

5.4.2.2. En conclusión, dentro del expediente T-1281247 (*acceso de un menor a un servicio no incluido en el POS –implante coclear–*), la Sala resolverá

revocar la decisión de segunda instancia y tutelar, en consecuencia, el derecho del menor a la salud, por las razones dadas. Pero se abstendrá de impartir cualquier tipo de orden en el caso concreto, por cuanto la amenaza a los derechos del menor ya fue superada hace tiempo, y por tanto, lo que corresponde, de acuerdo con la jurisprudencia constitucional, es limitarse a *declarar la carencia de objeto*.

5.4.2.3. En este caso (expediente T-1281247 *acceso de un menor a un servicio no incluido en el POS –implante coclear–*) también se hace manifiesta la posibilidad de que el proceso de evaluación del paciente por parte del médico tratante, se convierta en una barrera al acceso al servicio que se *requiere*. En el presente caso, la EPS no controvierte la pertinencia del servicio ordenado; fueron los jueces de instancia los que interpusieron la barrera. No obstante, del análisis de la jurisprudencia constitucional al respecto, se deduce que se trata de una cuestión recurrente, y en la cual pueden ser las EPS las que incluso adopten medidas orientadas a obstaculizar estratégicamente el acceso al servicio de salud.

5.4.3. En el expediente T-1320406 (*acceso de niña vinculada al sistema a un servicio de salud –mamoplastia–*) se estudió el caso de Mariela del Socorro Castilla Fernández, una mujer que interpuso acción de tutela en nombre de su hija de 15 años, Yoice Dalila Rueda Castilla, contra la Clínica Cardiovascular Jesús de Nazareth y el Departamento Administrativo Distrital de Salud, DADIS, por violar el derecho fundamental a la salud de su hija. Conforme a la Historia Clínica y evaluación médica hecha a la niña, ella presenta una *hipertrofia de glándulas mamarias*, por lo que se le ordenó la práctica de una cirugía plástica. La madre alega que carece de recursos económicos para asumir el costo del servicio de salud requerido, es desempleada, ama de casa y hace las uñas a domicilio; ambas, madre e hija, se encuentran en el nivel 2 del SISBEN. Advierte además, que luego de ser atendida “por medio del SISBEN” y que se le ordenara la cirugía, su hija fue remitida al DADIS, donde se le dio una orden para la clínica Jesús de Nazareth, entidad donde le dijeron que la llamarían, pero nunca lo hicieron. El juzgado de instancia negó la tutela por considerar que no se había probado que el servicio de salud ordenado, pusiera en riesgo su vida. Durante el trámite del proceso en sede de revisión, la Sala ordenó la práctica de pruebas que le permitieron establecer que según el DADIS, la menor sí tenía el derecho a acceder al servicio que decía requerir, pero que para ejercerlo era preciso que se le evaluara médicamente con anterioridad, de lo cual decía no tener registro.

5.4.3.1. La Sala considera que el Departamento Administrativo de Salud Distrital de Cartagena, DADIS, *irrespetó* el derecho a la salud de la niña hija de la accionante, al dejar de tomar las medidas adecuadas y necesarias para determinar si la niña requiere o no *con necesidad* un servicio de salud (*mamoplastia terapéutica*), y para garantizar su acceso efectivo al mismo, en caso de que se determine que sí lo requiere (*ver apartado 4.4.3.*). En el presente caso, el DADIS reconoció que la hija de la accionante sí tiene el derecho a acceder al servicio de salud que ella solicita, si lo requiere, pero no adoptó ninguna medida adecuada para informar, acompañar y hacer seguimiento a la madre de la niña, y garantizar así que, efectivamente, la

institución encargada de prestar el servicio de salud en cuestión lo haga. La institución tan sólo se pronunció y brindó información a la accionante, mediante escritos remitidos al proceso de tutela, por solicitud del juez. En consecuencia, la Sala resolverá tutelar el derecho a la salud de la hija de la accionante y confirmará las medidas cautelares ordenadas dentro de este caso.

5.4.3.2. En este caso, adicionalmente, se trata de una niña que tan sólo está vinculada al Sistema de Salud, no forma parte del régimen contributivo, del régimen subsidiado ni de los regímenes especiales. Se trata pues de un sujeto doblemente protegido, tanto por ser niña (*ver sección 4.5.*), como por no estar vinculada plenamente al Sistema de Salud (*ver sección 4.2.*). En tal sentido, la medida cautelar que se ratificará, garantizó el acceso al servicio específico requerido, pero no removió las barreras estructurales a las que se enfrenta cotidianamente, por no haber sido cubierta por ninguno de los dos regímenes. Atender los problemas estructurales que implica el estar vinculado, depende de que el Estado cumpla la obligación de garantizar la plena universalidad del Sistema. Esta obligación del Estado, derivada del derecho a la salud, será analizada posteriormente en términos generales (*ver sección 6.4.*).

## **5.5. El derecho de acceder a los servicios incluidos en el plan obligatorio, no puede ser obstaculizado alegándose incumplimiento en ciertos pagos, cuando la entidad se allana a la mora, al recibir nuevos pagos**

5.5.1. El quinto problema jurídico concreto analizado dentro del presente proceso es el siguiente: ¿Desconoce el derecho a la salud de una persona, la entidad encargada de garantizarle el acceso a una prestación social derivada de su estado de salud (incapacidades laborales), cuando se niega a autorizarlo porque en el pasado no se cumplió con la obligación de cancelar los aportes a salud dentro del plazo establecido para ello? Como se dijo previamente, la jurisprudencia constitucional, por ejemplo, ha señalado que la acción de tutela es procedente, de manera excepcional, para reclamar el pago de incapacidades laborales, por la importancia que estas prestaciones revisten para la garantía de los derechos fundamentales del trabajador al mínimo vital, a la salud y a la dignidad humana (*ver apartado 4.4.5.8.*). Específicamente, ha señalado que cuando una entidad promotora de salud no ha hecho uso de los diferentes mecanismos de cobro que se encuentran a su alcance para lograr el pago de los aportes atrasados, se allana a la mora y, por ende, no puede fundamentar el no reconocimiento de una incapacidad laboral en la falta de pago o en la cancelación extemporánea de las cotizaciones. En varios casos se ha reiterado esta decisión jurisprudencial, entre ellos, en algunos en los que se condenó al Instituto de Seguros Sociales, entidad accionada en el proceso que suscita este problema jurídico.

5.5.2. En el expediente T-1308199 (*reconocimiento de incapacidades, cuando los aportes a Salud fueron extemporáneos y a la vez aceptados por la EPS*), se

analiza la acción de tutela de Máximo Daniel Cuello Urzola, quien tiene un delicado estado de salud debido a que padece leucemia, contra el Seguro Social, seccional Cesar, por considerar que la entidad afecta su derecho a la vida y al mínimo vital al negarse a pagar tres incapacidades, cada una de 30 días. La entidad negó el reconocimiento de las incapacidades debido a que los pagos de los respectivos aportes a la salud a nombre del accionante se habían realizado extemporáneamente al Seguro Social. El accionante, un afiliado que cotiza como independiente, reconoció que debido a la difícil situación económica ha tenido que pagar con retraso de algunos días, pero siempre dentro del mes correspondiente. Las incapacidades a las que tiene derecho y se le han negado, son necesarias para su subsistencia. El Gerente del Seguro Social, Seccional Cesar, indicó que en ninguna de las tres incapacidades solicitadas, se observó el requisito establecido en el numeral 1 del artículo 21 del Decreto 1804 de 1999, según el cual se tiene el derecho a reclamar una incapacidad por enfermedad al haber cumplido, entre otras reglas, la siguiente: *‘haber cancelado en forma completa sus cotizaciones como empleador durante el año anterior a la fecha de solicitud frente a todos sus trabajadores. Igual regla se aplicará al trabajador independiente, en relación con los aportes que debe pagar al sistema. Los pagos a los que alude el presente numeral, deberán haberse efectuado en forma oportuna por lo menos (4) meses de los (6) meses anteriores a la fecha de causación del derecho...’*. El accionante había incumplido, a juicio del Director de la entidad acusada, con los pagos en todos los casos. Con relación a la incapacidad del 28 de mayo en todos los meses se pagó con algunos días de retraso (enero 6 días, febrero 11 días, marzo 3 días y abril 8 días después); lo mismo ocurrió con la incapacidad del 19 de julio de 2005 (marzo 3 días, abril 8 días, mayo 3 días, y junio 1 día después) y con la incapacidad del 18 de agosto del mismo año, en tres de los cuatro meses (mayo 3 días, junio 1 día, y agosto 4 días después, julio se canceló un día antes).

El juez de primera instancia, siguiendo la jurisprudencia constitucional, tuteló el derecho del accionante, en tanto que el juez de segunda instancia, desconociéndola, resolvió revocar la decisión y no tutelar el derecho. La Sala coincide con el juez de primera instancia. En el presente caso, la EPS acusada violó el derecho del accionante, pues se negó a autorizar un servicio requerido (incapacidades laborales), poniendo en riesgo su mínimo vital, por el hecho de considerar que no se había cumplido el requisito de pagar oportunamente los aportes a la salud, a pesar de que los mínimos retrasos en que se incurrió, no fueron cuestionados por la entidad. De hecho, tan sólo uno de ellos causó intereses.

5.5.3. En conclusión, la Sala considera que el Seguro Social irrespetó el derecho a la salud de Máximo Daniel Cuello Urzola, al haberle negado el pago de una prestación contemplada por el Sistema de Salud (incapacidad laboral) de la cual depende su mínimo vital, en razón a mínimos retrasos en el pago de los aportes, que no habían sido cuestionado o rechazados por la entidad. Ahora bien, como la Sala ya tuvo noticia de que la prestación del servicio se le garantizó al accionante, se limitará a confirmar la orden dispuesta en la medida cautelar adoptada dentro del proceso de la referencia. La Sala dispuso

que el Instituto de Seguros Sociales, Seccional Cesar, procediera (1) a dar respuesta a las solicitudes de reconocimiento de incapacidad laboral presentadas por Máximo Daniel Cuello ante dicha entidad —absteniéndose de negar el pago de las incapacidades laborales objeto de acción de tutela de la referencia con fundamento en que el pago de las cotizaciones se hizo extemporáneamente—, y (2) a notificar personalmente dicha respuesta al accionante.

## **5.6. El acceso a los servicios de salud que se *requieran*, está especialmente garantizado a las personas que padecen enfermedades catastróficas o de alto costo.**

5.6.1. El sexto problema jurídico concreto analizado en el presente proceso es el siguiente: ¿Desconoce el derecho a la salud de una persona, una entidad encargada de garantizar la prestación de los servicios de salud, al interrumpir el suministro de los mismos porque ya transcurrió un mes luego del momento en que la persona dejó de cotizar, en razón a que ahora es desempleado? De acuerdo con la jurisprudencia constitucional, *el acceso a un servicio de salud debe ser continuo, no puede ser interrumpido súbitamente*; viola el derecho a la salud una EPS que suspenda el suministro de un tratamiento médico que se requiera, *antes de que éste haya sido efectivamente asumido por otro prestador (ver apartado 4.4.6.4.)*. En especial, si se trata de un sujeto de especial protección en salud, por padecer una enfermedad catastrófica o de alto costo, caso en el cual, adicionalmente, no pueden cobrársele copagos.

5.6.2. En el Expediente T-1315769 (*acceso a servicio de salud incluido en el POS, sometido a pagos moderadores –carga viral–*), se plantea dicho problema jurídico. En este caso se estudió una acción de tutela interpuesta por Eduardo (diagnosticado como VIH positivo, en octubre de 2005) contra Comfenalco EPS, por considerar que esta entidad le viola sus derechos a la vida y a la salud, al negarse a autorizar la práctica de la prueba de carga viral que necesita y que fue ordenada por su médico tratante el 3 de enero de 2006 –por no haber cancelado previamente un copago equivalente al 68% del valor del servicio en cuestión—. El copago lo justificó la EPS en que el accionante no cuenta con las semanas mínimas de cotización requeridas para acceder al servicio requerido. El accionante considera que la EPS desconoce flagrantemente la Ley 972 de 2005 que impide negar los tratamientos requeridos a personas con VIH. Por tanto, el accionante solicita que se le ordene a la EPS acusada que cuanto antes, garantice la práctica del servicio de salud requerido y cubrir el 100% del costo del mismo. El accionante se encuentra desempleado desde noviembre de 2005 y antes devengaba un salario mínimo legal vigente, por lo que es claro que carece de capacidad económica para asumir el monto que se le está exigiendo. Comfenalco EPS indicó que de acuerdo con el artículo 75 del Decreto 806 de 1998, luego de que se terminó el periodo de protección laboral, el 30 de enero de 2006, retiró al accionante de la EPS, por lo que ya no existe relación contractual *usuario-EPS*. El 14 de febrero de 2006, el Juzgado 13 Civil Municipal de Medellín resolvió negar la acción de tutela, por considerar que Comfenalco EPS no

había desconocido los derechos a la vida y a la salud del accionante, en la medida que éste no se encuentra afiliado a aquella, es decir, que no existe relación contractual.

5.6.3. En conclusión, la Sala considera entonces, que Comfenalco EPS irrespetó grave y ostensiblemente el derecho a la salud del accionante al haber interrumpido los servicios de salud que requiere con necesidad, sin que otro prestador los haya asumido, para tratar la enfermedad catastrófica que padece (VIH/Sida). En el caso concreto, la Sala de Revisión dispuso medidas cautelares orientadas a garantizar el acceso a los servicios de salud que requiera el accionante. Por lo tanto, la Sala resolverá reiterar las medidas allí tomadas, y dejarlas en firme.

### **5.7. La limitación a la libertad de afiliación de las personas que padecen enfermedades catastróficas no debe impedir que la persona pueda acceder a los servicios de salud que *requiere*, con calidad, oportuna e idóneamente**

5.7.1. El séptimo problema jurídico planteado dentro del presente proceso es el siguiente: ¿Desconoce el derecho a la salud una entidad que se niega a afiliarse a una persona, a pesar de haberse cumplido el tiempo necesario para poder trasladarse, por el hecho de que dentro de su grupo familiar existe una persona (su hijo, un niño) que padece una enfermedad catastrófica y, por tanto, debería esperar más tiempo para poder trasladarse? Para la Sala, la respuesta a esta cuestión es afirmativa, en razón a que la entidad acusada está desconociendo una libertad derivada del derecho a la salud con base en una norma que no es pertinente.

5.7.2. Como se indicó, de acuerdo con la jurisprudencia constitucional y administrativa en la materia, es admisible la limitación impuesta por la regulación al derecho a libertad de escogencia dentro del Sistema de Salud a las personas afiliadas (*ver apartado 4.2.6.*). No obstante, tanto la regulación como la jurisprudencia son claras en señalar que el requisito de tiempo adicional se ha impuesto, únicamente, a las personas afiliadas que estén sometidas a tratamientos de alto costo. En otros términos, la limitación adicional impuesta a la libre escogencia tiene cuatro prerequisites para poder ser aplicada, a saber, (1) que el ‘afiliado’ (2) esté ‘*haciendo uso de servicios*’ (3) para atender ‘*procedimientos de alto costo*’ (4) ‘*sujetos a períodos mínimos de cotización*’. En tal medida, no es dado a una entidad encargada de garantizar la prestación de los servicios de salud, negar la afiliación a una persona con base en la limitación fijada por la regulación, por fuera de los parámetros fijados en la misma norma.

5.7.3. En el expediente T-1350500, caso en el que se plantea este problema jurídico, Jairo Eduardo Yepes Pérez, interpuso acción de tutela contra el Seguro Social EPS y Coomeva EPS por considerar que se le han violado y amenazado los derechos fundamentales a la salud y a la seguridad social, a él y a su familia. Coomeva EPS se negó a autorizar el traslado de su grupo

familiar, inscrito actualmente en el Seguro Social EPS, pues considera que de acuerdo a la regulación (numeral 9°, artículo 14, Decreto 1485 de 1994), el tipo de afectación a la salud que padece su hijo (una enfermedad de alto costo, sujeta a períodos mínimos de cotización), implica que su derecho a escoger libremente la entidad que preste el servicio de salud está limitado, salvo mala prestación del servicio, ‘por lo menos dos años después de culminado el tratamiento en la respectiva Entidad Promotora de Salud’. La EPS Coomeva participó en el proceso, para señalar que el accionante está afiliado al Sistema General de Seguridad Social en Salud a través del Seguro Social EPS, no de Coomeva EPS. Advierte que no le es posible atender la solicitud de traslado del accionante por cuanto en su grupo de beneficiarios se encuentra su hijo que padece de *hemofilia congénita y degenerativa*, enfermedad de “alto costo” en virtud de la cual, la reglamentación limita la libertad de escogencia. El Seguro Social EPS informó al Juez de tutela que no ha recibido solicitud alguna de traslado por parte de alguna otra EPS. A su parecer “(...) la EPS ISS no ha vulnerado ó amenazado los derechos constitucionales del accionante y es la EPS Coomeva quien lo hace al no dar la oportunidad de la libre elección de Entidad Promotora de Salud.” Los jueces de instancia negaron la tutela por cuanto consideraron que la entidad acusada se estaba limitando a aplicar la regulación.

5.7.4. Para la Sala, Coomeva EPS irrespeta el derecho de Jairo Eduardo Yepes Pérez al limitarle su libertad de afiliación con base en una regla inexistente. En efecto, la norma regulatoria que la entidad invoca –el numeral 9° del artículo 14 del Decreto 1485 de 1994– limita la libre escogencia a una persona en un caso muy preciso en el cual se deben observar 4 requisitos. Como se indicó, la norma impone la limitación cuando el ‘*afiliado*’ hace uso de un cierto tipo de servicios. No obstante, Coomeva EPS extiende la limitación de la regla al impedirle a una persona afiliarse a su entidad porque su hijo, o sea un “beneficiario”, tiene una enfermedad de alto costo, como si la norma dijera que la limitación se da cuando hace uso de un servicio para tal clase de enfermedad el ‘*afiliado*’ o un ‘*beneficiario*’ suyo.

Las entidades del sector de la salud tienen el deber de interpretar las normas aplicables a la luz de la Constitución, el bloque de constitucionalidad y la jurisprudencia constitucional pertinentes, con el fin de garantizar el goce efectivo del derecho a la salud a las personas. No es admisible, por el contrario, interpretar las normas aplicables de forma tal que se extiendan las limitaciones precisas a otros casos para los que no fueron contempladas, impidiendo así, por ejemplo el acceso a un servicio de salud que se requiera o, como ocurre en el presente caso, el ejercicio de una libertad derivada del derecho a la salud.

5.7.5. En conclusión, Coomeva EPS *irrespetó* el derecho a la salud del accionante y de su grupo familiar, al limitar su libertad de escogencia con base en una norma que no es aplicable al caso concreto. La interpretación de las reglas en salud ha de servir para asegurar a las personas el goce efectivo de

sus derechos. En tal medida se revocará la decisión de instancia y se tutelaré el derecho a la salud del accionante y de su grupo familiar. No obstante, en la medida en que la entidad ya dio cumplimiento a la medida cautelar dispuesta por la Sala para garantizar al accionante su libertad de poder afiliarse a la entidad acusada, no se impartirán ordenes adicionales en el caso concreto. La Sala se limitará a dejar en firme la medida cautelar proferida.

**5.8. Un órgano del Estado viola el derecho de petición cuando no responde con congruencia y de fondo la solicitud de una entidad o institución del sector, en especial si la petición va orientada a garantizar el goce efectivo del derecho a la salud de los afiliados y beneficiarios del sistema de salud.**

5.8.1. El octavo problema jurídico concreto es el siguiente: ¿Viola un órgano del Estado, el derecho de petición de una entidad encargada de garantizar la prestación de los servicios de salud y el derecho a la salud de los afiliados y beneficiarios al sistema de protección, al negarse a responder de fondo una petición para remover un obstáculo en uno de los trámites necesarios para asegurar el adecuado flujo de los recursos y, por tanto, el goce efectivo del derecho a la salud, en razón a que el órgano estatal respectivo se considera incompetente? Como lo ha señalado la jurisprudencia en innumerables ocasiones, *“es violatorio del derecho fundamental de petición que una autoridad pública se niegue a recibir, tramitar y dar respuesta de fondo a una petición”*. La Corte ha señalado que *“el núcleo esencial de derecho de petición reside en una respuesta pronta y oportuna de la cuestión. “Los requisitos de la respuesta son tres, (1) la oportunidad, (2) resolver (i) de fondo, (ii) clara, (iii) precisa y (iv) de manera congruente lo solicitado; (3) ser puesta en conocimiento del peticionario”*.

5.8.2. Este problema jurídico parte de los dos últimos casos acumulados dentro de la presente sentencia, en los cuales, a diferencia de lo que ocurre en los anteriores procesos, la entidad encargada de garantizar la prestación de los servicios de salud no es la parte accionada, sino la accionante. En el caso T-1645295 Sanitas EPS presentó acción de tutela en contra de la Sala Administrativa del Consejo Superior de la Judicatura por violar el derecho de petición consagrado en el artículo 23 de la Constitución Política al no haberle dado respuesta de fondo, integral y efectiva a dos comunicaciones que le fueron dirigidas por la EPS el 18 de diciembre de 2006 y el 18 de enero de 2007. Por otra parte, en el caso T-1646086, Sanitas EPS presentó acción de tutela contra el Ministerio de la Protección Social, por considerar que esta entidad le ha violado su derecho de petición al no haberle dado respuesta al escrito petitorio que había sido presentado días antes, el 6 de febrero del mismo año. Solicitó que se ordenara al Ministerio responder de fondo y adecuadamente la petición presentada.

5.8.3. Las comunicaciones presentadas por Sanitas EPS en ambos casos van orientadas a solicitar a las respectivas entidades que clarifiquen las reglas de

recobro ante el Fosyga, por cuanto el procedimiento existente se constituye en una barrera al flujo de recursos dentro del sistema de salud. En tal sentido, la respuesta del Consejo Superior de la Judicatura, según la cual la entidad no es competente, es una respuesta adecuada. Sin embargo, no ocurre lo mismo con el Ministerio de la Protección Social pues dicha entidad sí es competente para aclarar el procedimiento que el mismo diseñó.

Así, las entidades encargadas de garantizar la prestación de los servicios de salud tienen el derecho a que sus peticiones sean respondidas de fondo y con congruencia por los órganos del Estado del sector de la salud, en especial, si estas van encaminadas a que se adopten medidas que permitan el eficaz flujo de los recursos del Sistema de Salud para asegurar el goce efectivo del derecho a la salud.

5.8.4. La jurisprudencia constitucional ha señalado que el “*derecho de petición es fundamental y determinante para la efectividad de los mecanismos de la democracia participativa, (...) mediante él se garantizan otros derechos constitucionales, como los derechos a la información, a la participación política y a la libertad de expresión.*” Así pues, las peticiones presentadas por Sanitas EPS al Consejo Superior de la Judicatura y al Ministerio de la Protección Social, en el contexto de los procesos T-1645295 y T-1646086 respectivamente, no son meros trámites burocráticos. Son participaciones democráticas orientadas, en este caso, a la construcción de la mejor regulación posible, que permita a las entidades del sector cumplir con su obligación de garantizar el goce efectivo del derecho a la salud.

5.8.5. En conclusión, la Sala considera que el Consejo Superior de la Judicatura no violó el derecho de petición de Sanitas EPS, por cuanto no es la entidad competente para decirles a los jueces de la República, cómo han de interpretar las normas aplicables para los procedimientos de recobro de las EPS ante el Fosyga. Por la misma razón, en el segundo caso el Ministerio de la Protección Social sí violó el derecho de petición de la entidad accionante, así como el derecho a la salud de las personas afiliadas y beneficiarias al sistema, a través de la misma, por cuanto el Ministerio sí es competente para aclarar cuáles son las reglas y el procedimiento en cuestión. Por tanto, la Sala resolverá confirmar la decisión de instancia en el primero de estos dos procesos y revocarla en el segundo. En consecuencia, se ordenará al Ministerio de la Protección Social que responda de fondo la petición que le fue presentada, para lo cual se ha de tener en cuenta lo dispuesto en el apartado (6.2.) de la presente sentencia.

5.8.6. Ahora bien, teniendo en cuenta que la petición presentada por la EPS, versa sobre uno de los problemas recurrentes y graves de la regulación del sector de la salud relativo al flujo de recursos para financiar los servicios de salud, este será abordado por la Sala posteriormente (apartado 6.2).

**5.9. Las dudas acerca de lo que se encuentra incluido o no en el POS deben ser interpretadas conforme al principio de integralidad, mientras**

**no exista un mecanismo institucional para resolverlas.**

El noveno y último problema jurídico formulado es ¿Vulnera el derecho a la salud la interpretación restrictiva del POS, según la cual se entienden excluidos los insumos no incluidos expresamente en el POS, y procede en consecuencia su recobro ante el Fosyga cuando son ordenados por un juez de tutela? Como lo ha señalado la jurisprudencia de la Corte Constitucional *las inclusiones y exclusiones del POS deben ser interpretadas conforme a un criterio finalista, relacionado con la recuperación de la salud del interesado y el principio de integralidad*. En la práctica este criterio de interpretación del POS implica que en los casos en los que un procedimiento, tratamiento o actividad se encuentra incluido en el POS hay que entender que también lo están, los implementos y demás servicios de salud necesarios para su realización.

Todos los casos estudiados en este apartado tienen en común (i) la orden, por parte del médico tratante, de un procedimiento que incluye la implantación de un lente intraocular, (ii) la negación del lente intraocular por parte de las respectivas EPS, (iii) la protección de los derechos de los tutelantes por parte del juez de tutela y la correspondiente orden de suministro del lente intraocular y (iv) la orden de recobrar los costos del servicio médico suministrado al Fosyga.

En todos los casos se reiterará la jurisprudencia constitucional en relación con la interpretación del POS, confirmando las decisiones en cuanto a la orden del suministro del lente intraocular por parte de las EPS pero revocando las ordenes de recobro al Fosyga, ya que al entender incluido en el POS el lente intraocular desaparece la justificación para ordenar el reembolso de su costo. Con todo, estos casos ponen de presente una falla en la regulación que será estudiada en detalle en el apartado 6.1.1. consistente en la existencia de dudas acerca de los contenidos del POS y de la ausencia de regulación que permita definir en los casos concretos qué se encuentra incluido y qué no.

## **6. Problemas recurrentes constatados dentro de un patrón de violaciones al derecho a la salud. Órdenes a los órganos de regulación para garantizar el goce efectivo del derecho a la salud.**

La problematización de los casos concretos explicada en el aparte anterior, más allá de describir situaciones particulares de usuarios del sistema de salud refleja un problema estructural del Sistema de Seguridad Social en Salud generado, entre otros, por diversas fallas en la regulación. Como lo ha señalado la Corte Constitucional, el derecho a la salud de las personas en los casos concretos depende,

*“(…) entre otros factores, de la existencia de un marco normativo adecuado del sistema de seguridad social en salud. Es decir, para poder garantizar el goce efectivo del derecho a la salud, el Estado debe expedir las reglas necesarias e idóneas para organizar el*

*Sistema. Carecer de ellas o tener unas inadecuadas puede ser tan grave como carecer de recursos para atender a los pacientes.”*

Por esta razón, la adopción de órdenes encaminadas únicamente a resolver los casos concretos es insuficiente ya que, además de que las mismas situaciones se siguen presentando reiteradamente, el número de tutelas para acceder a servicios de salud tiene una sólida tendencia a crecer, como lo muestra el siguiente cuadro basado en un informe adelantado por la Defensoría del Pueblo.

Como se puede apreciar, el número de tutelas se cuadruplicó entre 1999 y 2005. También aumento el porcentaje de tutelas para amparar el derecho a la salud dentro del volumen total de acciones presentadas en dicho periodo. Ningún informe apunta en dirección contraria y según los datos disponibles en la Corte Constitucional las acciones de tutela en el ámbito de la salud siguen siendo las más numerosas.

En la sección (3.2.) de las Consideraciones de esta sentencia, se reiteró la jurisprudencia de la Corte Constitucional sobre el carácter fundamental del derecho a la salud. Además de los efectos que se derivan en los casos particulares en los cuales este derecho fundamental se encuentre amenazado o violado, esta caracterización tiene implicaciones profundas en cuanto a la protección del derecho al constatarse la violación recurrente del mismo en casos semejantes. Se pregunta entonces la Sala si basta la protección caso por caso o si, ante un patrón de violación de los derechos, como sucede en este caso con la salud, debe la Sala tomar decisiones que apunten a que los órganos competentes también superen las fallas en la regulación que han llevado a que se constaten los irrespetos a este derecho en repetidas ocasiones.

Como lo muestran las circunstancias descritas hasta ahora y las que se analizarán a lo largo de este capítulo, limitarse a resolver los casos concretos ha resultado insuficiente, por lo que, en concordancia con las implicaciones que se derivan del derecho a la salud como un derecho fundamental, en la presente sentencia se adoptarán además de las decisiones para resolver los casos concretos, diferentes medidas encaminadas a que los órganos encargados de regular el sistema de salud corrijan las fallas en la regulación, así como los obstáculos que resultan de la aplicación de la regulación existente, que afectan el goce efectivo del derecho fundamental a la salud de los usuarios. Estas órdenes atinentes a las fallas en la regulación se desprenden de los problemas revelados por los casos concretos estudiados en este proceso.

En tales casos, como se anotó, la Corte constató la existencia de fallas de tipo recurrente que son la causa del gran volumen de acciones de tutela, es decir, de solicitudes de amparo del derecho a la salud. Por ejemplo, son recurrentes las controversias sobre cuáles son los servicios de salud qué si están incluidos en el POS, lo cual demuestra que subsisten grandes incertidumbres sobre el alcance de los planes de beneficios. Tales incertidumbres han venido siendo

resueltas, caso por caso, por los jueces, en lugar de ser superadas definitivamente por el regulador. A esto se suma que, quizás ante la incertidumbre, muchas negativas de las EPS corresponden a servicios que sí están incluidos en el POS. Adicionalmente, la falta de un trámite para que la EPS autorice servicios médicos excluidos del POS, distintos a medicamentos no incluidos, conduce a que de nuevo caso por caso los jueces deban ordenar que se haga lo obvio, es decir, que el servicio médico ordenado por el médico experto sea autorizado. Si no existiera el vacío en la regulación del trámite para autorizar tales servicios, los usuarios no tendrían que acudir a la acción de tutela y accederían de manera más oportuna a los servicios de salud que requieren. Las EPS aducen que cuando el servicio requerido no está financiado por la unidad de pago por capitación, solo la orden del juez de tutela les asegura que podrán obtener el reembolso de dicho servicio médico por el Fosyga. Incluso tales reembolsos son ahora considerados insuficientes, porque son tan cuantiosas las sumas aún no recobradas por trabas en el trámite de recobro que los recursos no fluyen eficazmente del Fosyga hacia el sistema con el fin de asegurar la financiación de los servicios de salud y así garantizar el goce efectivo del derecho a la salud de los usuarios. Ante este patrón de desconocimiento de los derechos recurrentemente protegidos por sentencias de tutela, las autoridades de regulación han omitido adoptar las decisiones indispensables para atacar estas causas estructurales de la violación del derecho fundamental a la salud lo cual ha derivado en una *desprotección* del derecho fundamental a la salud.

La fundamentalidad del derecho a la salud exige que las autoridades de regulación adopten las determinaciones para protegerlo, para evitar que se repitan durante largos años las mismas violaciones del mismo y para garantizar el goce efectivo del derecho por todos los usuarios del sistema de seguridad social en salud, creado hace ya 15 años.

Estas órdenes también parten de la caracterización del derecho a la salud realizada en la presente sentencia (*ver sección 3.4.*), según la cual el derecho a la salud es un derecho fundamental que como todos los derechos, entraña tanto obligaciones positivas como negativas y tiene facetas prestacionales y otras que no lo son. Entre las obligaciones de carácter prestacional, adicionalmente, hay algunas que implican el diseño de políticas públicas complejas que requieren gasto y cuyo cumplimiento es entonces progresivo, y hay otras, más sencillas, que no exigen la adopción de un programa completo sino de una acción simple.

Frente a aquellas facetas del derecho a la salud que, son prestacionales y además progresivas, se justifica, en muchos casos, la imposibilidad de exigir judicialmente el inmediato cumplimiento de todas las obligaciones que se derivarían del derecho constitucional. Sin embargo, bajo el argumento de la progresividad tampoco puede ampararse la inacción prolongada de la administración en la adopción de políticas públicas dirigidas a garantizar el goce efectivo del derecho.

Pasa la Sala a analizar la necesidad de proferir órdenes encaminadas a remediar las causas de la violación recurrente del derecho a la salud en cada uno de los temas estudiados. En cada oportunidad se describirá el problema estructural y la situación actual para luego identificar el remedio constitucional idóneo, respetando las competencias y el experticio de las autoridades de regulación del sector salud.

### **6.1. Ordenes relacionadas con los planes de beneficios**

La Ley 100 de 1993, en desarrollo de los artículos 48 y 49 de la Constitución, prevé la creación de las condiciones para que tanto los afiliados al régimen subsidiado de salud como los afiliados al régimen contributivo de salud puedan acceder a un plan obligatorio de salud, el cual: “(...) *permitirá la protección integral de las familias a la maternidad y enfermedad general, en las fases de promoción y fomento de la salud y la prevención, diagnóstico, tratamiento y rehabilitación para todas las patologías, según la intensidad de uso y los niveles de atención y complejidad que se definan*” (Artículo 162, inciso 1 de la Ley 100 de 1993).

El plan obligatorio de salud debe ser definido y actualizado por el Consejo Nacional de Seguridad Social en Salud. Sin embargo, la Ley 100 de 1993 no estableció plazos para la actualización, aspecto que se analizará posteriormente.

El legislador estableció en la Ley 100 de 1993 que en los primeros siete años de vigencia del Sistema General de Seguridad Social en Salud, el plan obligatorio de salud del régimen contributivo contendría más servicios de salud que el plan obligatorio del régimen subsidiado. A partir del séptimo año de vigencia de esta ley (es decir, antes del año 2001) todos los afiliados del Sistema General de Seguridad Social en Salud, sin importar el régimen al que pertenezcan, debían acceder al mismo listado de servicios de salud (Art. 162, incs. 2 y 3 de la Ley 100 de 1993). Así mismo, se estableció que los ‘vinculados’ ingresarían progresivamente al régimen subsidiado y al plan de beneficios del mismo, de manera progresiva hasta alcanzar la cobertura universal en el año 2001.

En cuanto al contenido del plan obligatorio del régimen contributivo de salud, el inciso 2 del artículo 162 de la Ley 100 de 1993 estableció que éste sería definido por el Consejo Nacional de Seguridad Social en Salud y que “*será el contemplado por el Decreto-Ley 1650 de 1977 y sus reglamentaciones, incluyendo la provisión de medicamentos esenciales en su presentación genérica*”. En la actualidad, como se verá más adelante, el plan obligatorio de salud del régimen contributivo y el del régimen subsidiado, se encuentra regulado en diversos decretos, resoluciones y acuerdos.

Sobre la responsabilidad de suministrar el Plan Obligatorio de Salud el

artículo 156 de la Ley 100 de 1993 señala que ésta recae en las Entidades Promotoras de Salud. Dice la norma al respecto: “e) *Las Entidades Promotoras de Salud tendrán a cargo la afiliación de los usuarios y la administración de la prestación de los servicios de las Instituciones Prestadoras. Ellas están en la obligación de suministrar, dentro de los límites establecidos en el numeral 5 del artículo 180, a cualquier persona que desee afiliarse y pague la cotización o tenga el subsidio correspondiente, el Plan Obligatorio de Salud, en los términos que reglamente el gobierno; (...)*”

La jurisprudencia de la Corte Constitucional ha reiterado esta responsabilidad y ha reconocido el derecho de los ciudadanos a reclamar a las Entidades Promotoras de Salud el suministro de los contenidos del POS. Así, entre muchas otras, en la sentencia T-730 de 2006 (MP Jaime Córdoba Triviño) se señala que “*según el marco legal descrito, a las Entidades Promotoras de Salud les es exigible el conjunto de prestaciones contenidos en el Plan Obligatorio de Salud y de acuerdo con lo establecido por el Consejo Nacional de Seguridad Social, en armonía con las disposiciones legales. Precisamente, el artículo 9° del Decreto 806 de 1998 que incorpora disposiciones previstas en el derogado decreto 1938 de 1994, prevé, en términos generales, los lineamientos dentro de los cuales el Plan debe ser definido, y por ende garantizado, por las Entidades Promotoras de Salud, con la precisión de que la condición de calidad se sujeta a la tecnología existente en el país y a las condiciones financieras del Sistema. || El Plan Obligatorio de Salud se constituye, entonces, en un conjunto de prestaciones expresamente delimitadas, que deben satisfacer y garantizar las Entidades Promotoras de Salud, en armonía con la definición del Plan Obligatorio hecha por la autoridad competente, que lo es para el efecto el Consejo Nacional de Seguridad Social en Salud.*”

A continuación se resaltan algunos aspectos de los planes de beneficios en los que se han identificado problemas recurrentes que imponen barreras al acceso al derecho a la salud de los usuarios y frente a los cuales las medidas adoptadas hasta el momento no han reportado una mejoría significativa, lo que muestra la necesidad de adoptar nuevas decisiones con miras a garantizar el goce efectivo del derecho a la salud de los colombianos.

### ***6.1.1. Medidas para eliminar la incertidumbre acerca del contenido de los planes de beneficios y actualización periódica de los mismos.***

#### ***6.1.1.1. Análisis del problema y de la situación actual.***

6.1.1.1.1. El artículo 162 de la Ley 100 de 1993 que regula el *Plan de Salud Obligatorio*, ordena en el párrafo segundo la actualización del POS de la siguiente forma: ‘*Los servicios de salud incluidos en el Plan Obligatorio de Salud serán actualizados por el Consejo Nacional de Seguridad Social en Salud, de acuerdo con los cambios en la estructura demográfica de la población, el perfil epidemiológico nacional, la tecnología apropiada disponible en el país y las condiciones financieras del sistema.*’

La competencia para efectuar esta actualización fue atribuida al Consejo Nacional de Seguridad Social por la misma norma, así: *‘El Consejo Nacional de Seguridad Social en Salud tendrá las siguientes funciones: 1. Definir el Plan Obligatorio de Salud para los afiliados según las normas de los regímenes contributivo y subsidiado, de acuerdo con los criterios del capítulo tercero del primer título de este libro. (...) 5. Definir los medicamentos esenciales y genéricos que harán parte del Plan Obligatorio de Salud.’* (art. 162, Ley 100 de 1993).

Recientemente, la Ley 1122 de 2007 atribuyó esta misma competencia a la Comisión de Regulación en Salud en los siguientes términos: *‘Artículo 7°. Funciones. La Comisión de Regulación en Salud ejercerá las siguientes funciones: 1. Definir y modificar los Planes Obligatorios de Salud (POS) que las Entidades Promotoras de Salud (EPS) garantizarán a los afiliados según las normas de los Regímenes Contributivo y Subsidiado. 2. Definir y revisar, como mínimo una vez al año, el listado de medicamentos esenciales y genéricos que harán parte de los Planes de Beneficios.’* Sin embargo, hasta el momento no ha empezado a funcionar por lo que la competencia aún es ejercida por el Consejo Nacional de Seguridad Social en Salud.

El Plan Obligatorio de Salud del Régimen Contributivo fue adoptado por primera vez mediante el Acuerdo 008 de 1994 expedido por el Consejo Nacional de Seguridad Social en Salud, el cual ordenó, entre otros, la expedición del Manual de Actividades, Intervenciones y Procedimientos del Plan Obligatorio de Salud en el Sistema General de Seguridad Social en Salud. Este último, por su parte, fue adoptado mediante la Resolución 5261 de 1994 del Ministerio de Salud (hoy de la Protección Social). A su vez, el Plan Obligatorio de Salud del Régimen Subsidiado fue adoptado por primera vez mediante el Acuerdo 23 (sin fecha) del Consejo Nacional de Seguridad Social en Salud.

Para poder aplicar los respectivos planes de beneficios también el Consejo Nacional de Seguridad Social en Salud adoptó el Listado de medicamentos esenciales mediante el Acuerdo 83, el cual fue modificado por los Acuerdos 106 y 110. Posteriormente todos estos fueron sustituidos por el Acuerdo 228 de 2002 que adoptó un nuevo listado de medicamentos esenciales y el Acuerdo 282 de 2004, entre otros, que lo modificó.

Con posterioridad a su adopción, ambos planes de beneficios han sido modificados y adicionados en múltiples oportunidades, especialmente en los últimos años. Entre otros, el Acuerdo 226 de 2002 incluyó el Acelerador Lineal para Teleterapia con fotones; el Acuerdo 289 de 2005 incluyó las Cirugías Reparadoras de Seno, el Tratamiento para paladar hendido y labio figurado y el Tratamiento para gran quemado, siempre y cuando se lleven a cabo con fines funcionales; el Acuerdo 302 de 2005 incluyó las mallas de polipropileno no recubiertas, usadas en los procedimientos de herniorrafia o hernioplastia; el Acuerdo 313 de 2005 incluyó Colecistectomía por vía

laparoscópica; el Acuerdo 350 de 2006 incluyó la Evacuación por aspiración del útero para terminación del Embarazo; el Acuerdo 368 de 2007 incluyó el medicamento Lopinavir/Ritonavir 200/50 mg cápsulas para el tratamiento del VIH/SIDA; y, recientemente, el Acuerdo 380 de 2008 mediante el cual se incluyó el condón de látex y varios anticonceptivos.

Cabe recordar que el Plan Obligatorio de Salud también ha sido modificado como consecuencia explícita de una decisión judicial. Así, el Acuerdo 263 de 2004 incluyó un medicamento para el tratamiento del cáncer en los siguientes términos: *‘Artículo 1º. Con el fin de dar cumplimiento al fallo de la Sección Tercera-Sala de lo Contencioso-Administrativo del Consejo de Estado, de diciembre 11 de 2003, aclarado mediante providencia del 5 de febrero de 2004, inclúyase en el Plan Obligatorio de Salud el principio activo denominado Acido Zoledrónico o Zoledronato en solución intravenosa para el tratamiento del cáncer, prescrito exclusivamente por oncólogo y de conformidad con la guía para la prescripción del medicamento que elabore previamente el Instituto Nacional de Cancerología y adopte el Ministerio de la Protección Social en los siguientes casos: a) Hipercalcemia de malignidad (excluyendo los casos asociados a hiperparatiroidismo y los no relacionados con tumores); b) Mieloma múltiple y metástasis ósea documentada de tumores sólidos como coadyuvante de la terapia antineoplásica convencional (para su uso en cáncer de próstata, sólo está indicado si este ha avanzado después de su manejo con por lo menos una terapia hormonal).’*

Por su parte el POS subsidiado ha sido modificado por el Acuerdo 49 que lo adicionó y modificó en varios aspectos; el Acuerdo 72 que reguló nuevamente el Plan de Beneficios del Régimen subsidiado y subrogó al Acuerdo 49; el Acuerdo 306 de 2005 que derogó el 72, definió nuevamente el contenido del Plan Obligatorio de Salud del régimen subsidiado y trató de recoger todas las normas que lo regulaban, entre otros.

6.1.1.1.2. A pesar de estos cambios, que han sido importantes y que reflejan la intención de ajustar gradual y puntualmente los planes de beneficios, estos no han sido revisados de acuerdo con los criterios que señala la ley para desarrollar esta tarea. Al respecto la Ley 100 de 1993 indica que el POS debe ser actualizado y que la actualización debe tener en cuenta *“los cambios en la estructura demográfica de la población, el perfil epidemiológico nacional, la tecnología apropiada disponible en el país y las condiciones financieras del sistema”*.

La realización de cambios puntuales en el POS, si bien es una medida que puede contribuir eventualmente a mejorar la cobertura o la prestación de los servicios de salud dentro del SGSSS, no se corresponde con una *actualización*, tal y como lo ordena la ley. La actualización supone, más allá de ajustes puntuales, una revisión sistemática del POS conforme a (i) los cambios en la estructura demográfica, (ii) el perfil epidemiológico nacional, (iii) la tecnología apropiada disponible en el país y (iv) las condiciones financieras del sistema. Teniendo en cuenta que el POS que actualmente se

aplica fue adoptado en 1994, cuando apenas empezaba a funcionar el SGSSS y que este lleva 14 años de vigencia, se puede inferir que ha transcurrido un lapso razonable para verificar la necesidad de adaptar el POS a las nuevas condiciones en salud que se presentan en el país, según lo establecido en la ley. Esta actualización puede comprender un enfoque distinto al del POS vigente, según lo determine el órgano competente para ello, por ejemplo, a partir de patologías.

En la sentencia T-025 de 2006 se consideró que esta desactualización del POS afectaba los derechos fundamentales de los usuarios. Se dijo en esa ocasión lo siguiente: *“Cuando empezó a regir el Sistema General de Seguridad Social en Salud, es decir en el año de 1994, se contempló un listado oficial de medicamentos incluidos en el Plan Obligatorio de Salud. Sin embargo, desde esa fecha éste Sistema, no ha gozado de grandes actualizaciones, siendo evidente que con el paso del tiempo, la experiencia y los casos presentados han demostrado que hay muchos medicamentos necesarios para el tratamiento de enfermedades ruinosas, catastróficas, de niños, y de personas de la tercera edad que están por fuera del Plan Obligatorio de Salud. Hecho que hace que el afiliado o beneficiario, deba esperar su autorización, cubrir un porcentaje, o acudir a la acción de tutela porque sus escasos recursos económicos no le permiten adquirir los medicamentos o procedimientos necesarios para el tratamiento de la enfermedad que lo aqueja. Para esta Sala de revisión, no puede aplicarse con rigidez lo dispuesto en el Plan Obligatorio de Salud, pues además de que su listado oficial está desactualizado, en algunas circunstancias, su aplicación causa un perjuicio a quien requiere de procedimientos no incluidos en el Plan, a tal punto de desconocer sus derechos constitucionales fundamentales a la vida, a la integridad personal y a la dignidad.”*

Además de los problemas relacionados con los servicios médicos excluidos de los planes de beneficios y con la ausencia de una revisión integral, muchas de las tutelas que se interponen solicitando el acceso a servicios tienen su origen en la existencia de dudas acerca de lo que se encuentra incluido o excluido del POS y la ausencia de mecanismos institucionales dentro del Sistema de Seguridad Social en Salud para superar claramente dicha incertidumbre.

En una de sus intervenciones dentro del presente proceso, el Ministerio de Hacienda y Crédito Público consideró que si bien en cuanto al Plan Obligatorio del régimen subsidiado existe acuerdo respecto de sus contenidos, no ocurre lo mismo con el Plan del régimen contributivo. A su juicio, pese a los avances que se han hecho, *“sería conveniente al expedición de un Acuerdo que haga las aclaraciones, como se hizo con el POS en el régimen subsidiado, lo cual requiere de un trabajo dentro de un plazo prudencial (...)”* El Ministerio considera que los desacuerdos sobre los contenidos del POS se han presentado, principalmente, con relación a cuáles son las prótesis incluidas dentro del Plan, esto es, cuál es el alcance del artículo 12 de la Resolución 5261 de 1994. Otra de las causas de discrepancias *“se originó por la nueva codificación adoptada por el entonces Ministerio de Salud, hoy Ministerio de*

*la Protección Social, expresada en CUPS (Codificación Única de Procedimientos en Salud), mediante la Resolución 1896 de 2000, que exige una adecuación del contenido del Manual de Actividades, Procedimientos e intervenciones del Plan Obligatorio de Salud, que no se ha efectuado oficialmente porque no se ha expedido un Acuerdo adoptándolo.”* Reconociendo la incertidumbre que existe sobre el contenido del Plan Obligatorio de Salud, la Defensoría del Pueblo indicó que dentro de los estudios que ha realizado al respecto de este tema ha recomendado que se proceda a *“la revisión, reajuste y adecuación del contenido del Plan Obligatorio de Salud, de tal forma que las actividades, procedimientos y patologías en él incluidas estén tan clara y precisamente delimitados que no den mayor campo a la interpretación por parte de quienes deben proceder a su autorización.”*

Entre los escritos presentados ante esta Corporación en el presente proceso, ACEMI allegó un escrito en el que plantea uno de los casos de duda del contenido del POS que ha sido tratado con más frecuencia por la jurisprudencia constitucional: la inclusión o no, de los insumos como el lente intraocular no previstos explícitamente en el POS. En efecto, acumulados en la presente sentencia hay 9 casos en los que se ordenan procedimientos que incluyen el implante de lente intraocular, el cual, según las EPS debe ser asumido directamente por los usuarios ya que no se encuentra previsto explícitamente como una prótesis en la Resolución 5261 de 1994 (T-1855574, T-1858995, T-1858999, T-1859088, T-1862038, y T-1862046, T-1866944, T-1867317 y T-1867326).

El POS fue adoptado bajo una metodología de *coberturas explícitas* en la cual los servicios cubiertos son únicamente aquellos incorporados expresamente, en oposición a un sistema de *coberturas implícitas* en el cual únicamente se encuentran por fuera de la cobertura los servicios excluidos expresamente: *“(…) existen dos metodologías para diseñar planes de seguros en salud, sean pólizas de seguros comerciales o planes de seguridad social en salud, que determinan el alcance de los servicios cubiertos. || De un lado, aparecen los denominados planes de servicios nombrados o de coberturas explícitas, en los cuales los servicios cubiertos son únicamente aquellos que son incorporados en forma expresa en la cobertura, entendiéndose excluidos todos los demás. De otro lado, existe la metodología denominada de coberturas implícitas, bajo la cual se entienden amparados todos los servicios, excepto aquellos que sean materia de exclusión expresa. (...) El POS fue definido bajo la primera de las metodologías nombradas, es decir, cubre solamente los servicios nombrados o explícitos. (...)”*

Como un ejemplo de que efectivamente el POS adopta la metodología de *coberturas explícitas*, el artículo 12 de la Resolución 5261 de 1994 que prescribe: *“Utilización de prótesis, ortesis, aparatos y aditamentos ortopédicos o para alguna función biológica. Se definen como elementos de este tipo, aquellos cuya finalidad sea la de mejorar o complementar la capacidad fisiológica o física del paciente. Cuando el paciente requiera de su*

*utilización y se encuentren expresamente autorizados en el plan de beneficios, se darán en calidad de préstamo con el compromiso de devolverlos en buen estado salvo el deterioro normal; en caso contrario deberá restituirlos en dinero por su valor comercial. PARAGRAFO. Se suministran prótesis, ortesis y articulares y material de osteosíntesis, siendo excluidas todas las demás. En aparatos ortopédicos se suministrarán: muletas y estructuras de soporte para caminar; siendo excluidos los zapatos ortopédicos, plantillas, sillas de ruedas, medias con gradiente de presión o de descanso, corsés, fajas y todos los que no estén expresamente autorizados.”*

El Ministerio de Protección Social advierte que ha venido adoptando recientemente una interpretación extensiva del POS según la cual se considera incluido en el POS, entre otros “[t]odos los elementos e insumos necesarios aunque no se encuentren siquiera mencionados en el POS”. Sin embargo, el Ministerio de Hacienda y Crédito Público se opone a dicha interpretación y, “(...) estima que una prestación se encuentra contemplada en el POS si se incluyó dentro del cálculo de la UPC”.

El 4 de enero de 2006 el Ministerio de Protección Social emitió un concepto suscrito por el Director General de Gestión de la Demanda, por solicitud de un ciudadano en el cual señaló: “(...) las actividades, procedimientos e intervenciones a partir de las cuales están definidas las prestaciones en el Plan Obligatorio de Salud, son conjuntos de acciones que entrañan el uso y/o gasto de unos recursos que generalmente son indefectibles para la efectiva o adecuada realización y provisión de tales servicios. Es decir que, la falta de disponibilidad de alguno de estos recursos conlleva a la imposibilidad de la ejecución de las actividades, procedimientos e intervenciones lo cual, para efectos del Plan Obligatorio de Salud, implica el desconocimiento de sus derechos a los usuarios según principios del sistema.” Y mas adelante dijo: “(...) las EPS no pueden negarse a cubrir los recursos materiales o tecnológicos ni de otro tipo, en tanto estos sean insustituibles y esenciales para tal tratamiento, cualquiera sea su tipo, marca, o costo, con mayor razón si la descripción del procedimiento contiene la mención explícita de ese recurso material o dispositivo con nombre específico o genérico.”

A manera de ejemplo, entre otros, se refiere a la inclusión del lente intraocular en la cirugía de cataratas. Se sostiene que en “el Plan Obligatorio de Salud del régimen contributivo está cubierto el lente intraocular según lo dispuesto en la res. 5261 de 1994 por la cual se adoptó el manual de actividades, procedimientos e intervenciones del Plan Obligatorio de Salud, en cuyo artículo 58, con códigos 2905 y 2906 se mencionan procedimientos en los cuales se usa lo aplica tal dispositivo que incluso es mencionado expresamente dentro de la descripción de la prestación. || En el régimen subsidiado el lente intraocular, usado para el tratamiento de cataratas, igualmente está cubierto en virtud de lo dispuesto por el CNSSS en el Acuerdo 306, artículo segundo, numeral 2.5.”

Inclusive en uno de los expedientes acumulados dentro del presente proceso

en los que se discutía la inclusión o no del lente intraocular en el POS (T-1862038), el Ministerio de la Protección Social intervino para señalar que en *“atención al asunto de la referencia que trata de un Suministro e implante de lente intraocular; me permito manifestarle que el procedimiento referido se encuentra incluido en el Manual de Actividades del POS, conforme al artículo 57 de la resolución 5261 de 1991. (...) No obstante lo anterior, la atención de la accionante, requiere de un mínimo de semanas cotizadas dentro del Sistema General de Seguridad Social en Salud, el cual no debe sobrepasar el límite señalado en el literal h del 14 artículo de la ley 1122 de 2007, el cual es de 26 semanas. (...) Lo anterior significa que la accionante tendrá derecho al tratamiento integral mencionado, por parte de la E.P.S., siempre y cuando tenga las semanas aludidas, lo cual incluye toda la intervención, procedimiento, actividad quirúrgica y medicamentos que se encuentren incluidos en los listados POS(...)”*.

Frente a la posición del Ministerio de Protección Social, el Ministerio de Hacienda y Crédito Público, específicamente la Dirección General de Regulación Económica de la Seguridad Social, el 7 de septiembre de 2007 emitió un concepto para Comfenalco Valle en el que afirmó respecto a lo indicado por el Ministerio de Protección Social: *“Este Ministerio se aparta del concepto emitido por dicha Dirección, entre otras razones, por las que enunciamos a continuación, las cuales guardan relación con la evaluación financiera que puede generar en el Sistema General de Seguridad Social en Salud, y los efectos en el equilibrio financiero POS-UPC. (...) no resulta suficiente acudir a análisis conceptuales en relación con la integralidad de la atención o del acto médico como tampoco acudir a argumentos de sentido común tales como que si una actividad esta listada en el POS todo lo que se requiera para su realización también debe estar incluido.”*

Contrario a lo señalado por el Ministerio de Protección Social, el Ministerio de Hacienda y Crédito Público indica que: *“(...) si el elemento no se encuentra señalado en el artículo 12 de la Resolución 5261 de 1994, ni la inclusión del elemento se encuentra explícita en la descripción del procedimiento, se debe concluir que no estaría cubierta en el POS.”* Reiterando lo expuesto en una comunicación anterior de esa misma entidad el Ministerio de Hacienda precisó que, entre otros procedimientos en los que había duda, el lente intraocular no se encontraba incluido. Sostuvo: *“En las tarifas de los manuales vigentes se incluyen, entre otros, el costo de cirujano, perfusionista, derechos de sala, materiales y hemodinamia, estos son los costos que contempla el modelo para sus cálculos financieros; de acuerdo con lo anterior se observa que en los cálculos financieros de este Ministerio, en lo relacionado con los procedimientos MAPIPOS (...) 2628 Queratoplastia penetrante más cirugía combinada de catarata, antiglaucomatosa o lente intraocular; 2906 inclusión secundaria de lente intraocular (...) sólo se encuentra calculado la parte correspondiente a los actos médicos pero no los aparatos objeto de los citados procedimientos (...)”*.

6.1.1.1.3. Mas allá de cualquier consideración acerca de los argumentos con

base en los cuales cada una de estas entidades afirma cuál debe ser la interpretación del POS en cuanto a las inclusiones y exclusiones, lo anterior muestra que no existe certeza acerca de qué insumos para los procedimientos e intervenciones se encuentra incluidos y cuáles no. La ausencia de certeza acerca de la inclusión del lente intraocular en el POS se ha manifestado también en múltiples casos resueltos por la Corte Constitucional en situaciones en las que se ordena el procedimiento, pero se niega el insumo bajo el argumento de que no se encuentra expresamente incluido. En estos casos, de los cuales hay nueve acumulados en el presente proceso, la Corte ha aplicado la siguiente regla: *si bien el lente intraocular no se encuentra expresamente incluido como una prótesis en el artículo 12, lo cierto es que en la parte especial relativa a las intervenciones quirúrgicas de oftalmología encuentra expresa consagración y por tanto, debe ser suministrado por las EPS sin excusa alguna. Esta conclusión deviene, entre otros, de la aplicación de un criterio finalista y el deber de dar una prevalencia a las inclusiones particulares sobre las exclusiones generales.*

El Sistema General de Seguridad Social en Salud, a través de la regulación, no prevé un mecanismo específico, ni unos criterios de interpretación, salvo alguna excepción como la indicada, y otras que serán señaladas más adelante, para resolver las dudas acerca de si un servicio de salud se encuentra incluido, no incluido o excluido. Por su parte, la jurisprudencia, a partir de este vacío regulativo y de la necesidad de resolver casos concretos en los cuales se presentaban desacuerdos acerca de la inclusión o no de un servicio de salud en el POS, ha ido señalando algunos criterios de interpretación que se deben tener en cuenta en estos casos.

En la sentencia T-859 de 2003 esta Corporación se refirió a la importancia constitucional de la discusión acerca del contenido del POS y consideró que la ausencia de certeza acerca de los contenidos del derecho a la salud, protegidos en el POS, constituía una vulneración del derecho a la salud lo cual justificaba la elaboración de unas reglas de interpretación jurisprudenciales. Se dijo en esa ocasión,

*“La Corte estima que resulta relevante para el juez constitucional dicha discusión, pues está de por medio la definición del alcance del derecho a la salud y la definición de los derechos subjetivos derivados del diseño estatal de su prestación. Los ciudadanos tienen derecho a que exista certeza sobre las prestaciones cubiertas por el sistema nacional de salud.*

(...)

*La indeterminación en estos puntos implica, de suyo, la puesta en peligro del derecho a la salud lo que, en abstracto, autoriza la intervención del juez constitucional.”*

Así pues se han elaborado algunas reglas generales para resolver dudas acerca

de la pertenencia de un servicio de salud al POS, y otras reglas específicas aplicables a hipótesis concretas de exclusión.

(i) *Las inclusiones y exclusiones del POS deben ser interpretadas conforme a un criterio finalista, relacionado con la recuperación de la salud del interesado y el principio de integralidad.* La aplicación concreta de este criterio se ha orientado a señalar que en los casos en los que un procedimiento, tratamiento o actividad se encuentra incluido en el POS hay que entender que también lo están, de conformidad con el principio de integralidad, los implementos y demás servicios de salud necesarios para su realización de tal forma que cumpla su finalidad de lograr la recuperación de la salud. Sobre la justificación de este criterio a la luz del derecho a la salud señaló la Corte: “*El derecho a la salud, en los términos de la Observación General N°14 del Comité de Derechos Económicos, Sociales y Culturales, se entiende como el derecho al máximo nivel posible de salud que le permita vivir dignamente. Lo anterior supone una clara orientación finalista de este derecho, lo que impone la adopción del mismo criterio para efectos de interpretar las disposiciones que regulan la materia. (...) Si se busca garantizar el mayor nivel de salud posible, autorizar un procedimiento implica autorizar los elementos requeridos para realizar el procedimiento, salvo que sea expresamente excluido uno de tales elementos. (...) A esta solución podría oponerse la regla establecida en el artículo 18 literal i) de la misma resolución, conforme a la cual están excluidas las “actividades, intervenciones y procedimientos no expresamente consideradas en el presente Manual”. (...) dicha disposición no prohíbe el suministro de los elementos requeridos para realizar el procedimiento, intervención o actividad, sino que prohíbe actividades, procedimientos e intervenciones no contenidas en el manual.*”

(ii) *En caso de duda acerca de la exclusión o no de un servicio de salud del POS, debe aplicarse la interpretación que resulte más favorable a la protección de los derechos de la persona, de conformidad con el principio ‘pro homine’.* En consecuencia, la interpretación de las exclusiones debe ser restrictiva a la vez que la interpretación de las inclusiones debe ser amplia. Al respecto la Corte ha señalado que “*si se presentan dudas acerca de si un servicio, elemento o medicamento están excluidos o no del POS, la autoridad respectiva tiene la obligación de decidir aplicando el principio pro homine, esto es, aplicando la interpretación que resulte más favorable a la protección de los derechos de la persona. Por ello, una interpretación expansiva de las exclusiones es incompatible con dicho principio.*” Con idénticos efectos la Corte ha señalado que en los casos de duda acerca de si un servicio médico se encuentra excluido se debe acudir a una interpretación que permita el goce efectivo del derecho. Ha dicho que el “*Pacto Internacional de Derechos Económicos, Sociales y Culturales sujeta el goce de los derechos definidos en ella al principio de progresividad. Ello supone que únicamente cuando se ha incluido, por así requerirlo el derecho en cuestión, la prestación dentro del sistema de salud (en este caso), éste es exigible. Ello podría llevar a pensar que, aún con las imprecisiones antes indicadas, sólo son exigibles aquellas prestaciones definidas por el Estado, pues de esta manera se asegura que el cubrimiento corresponde al nivel de desarrollo y a los recursos existentes. La*

*Corte comparte este argumento, salvo en los casos de duda. En tales eventos, en atención a los principios pro libertatis y de buena fe en el cumplimiento de los tratados, en concordancia con el principio de dignidad humana, debe preferirse la opción que extienda o amplíe el aspecto de goce del derecho fundamental. Visto en sentido contrario, toda restricción a un derecho debe ser expresa y no dejar asomo de duda. Tal es la carga que debe asumir el garante del derecho.”*

Recuerda la Sala que frente a las cirugías plásticas o con fines de embellecimiento la regulación sí ha previsto un criterio de interpretación según el cual, *las cirugías plásticas enunciadas en la Resolución 5261 de 1994 que tengan finalidad reconstructiva funcional se encuentra incluidas en el POS y deben ser suministras por las EPS sus usuarios*. Así por ejemplo se encuentran incluidas en el POS las cirugías reparadoras de seno, el tratamiento para paladar hendido y labio fisurado y el tratamiento para gran quemado.

Si bien en la jurisprudencia de la Corte Constitucional se han adoptado los criterios descritos para resolver las dudas que suscita el contenido del POS, lo anterior muestra la imperiosa necesidad de que se determine, en definitiva, qué servicios de salud se encuentran incluidos en el Plan Obligatorio de Salud y qué servicios no lo están. Lo anterior teniendo en cuenta que la definición de los planes de beneficios es competencia del regulador sin perjuicio de la procedencia de la acción de tutela en los casos en los que existe amenaza o vulneración del derecho a la salud.

Además de la importancia de la definición clara de los contenidos de los planes de beneficios para efectos de la protección del derecho a la salud de los usuarios, este aspecto es esencial para aclarar el ámbito de financiación de la UPC y los casos en los cuales procede el recobro ante el Fosyga, ya que estos recursos sólo están previstos para los casos en los cuales el servicio no se encuentra en el POS y la persona carece de recursos propios para sufragarlo. Así pues, la incertidumbre con relación a los contenidos del plan obligatorio de servicios de salud afecta gravemente el derecho a la salud de las personas, no sólo por cuánto impone barreras en el trámite para acceder a los servicios, sino también porque impide adoptar las medidas adecuadas y necesarias para asegurar la financiación de éstos con miras a asegurar el goce efectivo del derecho a la salud.

La Corte Constitucional ha reiterado que los servicios de salud comprendidos dentro del POS ya se encuentran financiados dentro del sistema de aseguramiento creado por la Ley 100 de 1993. Ello justifica que el juez de tutela ordene prestar tales servicios de manera inmediata, para proteger el goce efectivo del derecho a la salud. Así se ha reconocido que existe una estrecha relación entre el POS y la UPC.

En efecto, el artículo 156 de la Ley 100 de 1993 establece entre las características básicas del sistema, el mecanismo de financiación del Plan Obligatorio de Salud a través de la UPC y atribuye su definición al Consejo

Nacional de Seguridad Social en Salud, en los siguientes términos: “f) *Por cada persona afiliada y beneficiaria, la Entidad Promotora de Salud recibirá una Unidad de Pago por Capitación - UPC - que será establecida periódicamente por el Consejo Nacional de Seguridad Social en Salud; (...).*”

Entre las funciones del Consejo Nacional de Seguridad Social reguladas por el artículo 172 de la Ley 100 de 1993, se encuentra: “3. *Definir el valor de la Unidad de Pago por Capitación según lo dispuesto en el artículo 182 del presente libro*”. A su vez el párrafo segundo de la misma norma establece una periodicidad anual para su revisión y un mecanismo de renovación automática en caso de que el Consejo no cumpla con esta función. Dice la disposición: “*El valor de pagos compartidos y de la Unidad de Pago por Capitación - UPC - serán revisados por lo menos una vez por año, antes de iniciar la siguiente vigencia fiscal. En caso que no se haya revisado la UPC al comenzar el año, ésta se ajustará en forma automática en una proporción igual al incremento porcentual del salario mínimo aprobado por el Gobierno Nacional el año inmediatamente anterior.*”

Finalmente el artículo 182 de la misma norma define los criterios con base en los cuales debe ser definido el monto de la UPC así: “*(...) Por la organización y garantía de la prestación de los servicios incluidos en el Plan de Salud Obligatorio para cada afiliado, el Sistema General de Seguridad Social en Salud reconocerá a cada Entidad Promotora de Salud un valor per cápita, que se denominará Unidad de Pago por Capitación UPC. Esta Unidad se establecerá en función del perfil epidemiológico de la población relevante, de los riesgos cubiertos y de los costos de prestación del servicio en condiciones medias de calidad, tecnología y hotelería, y será definida por el Consejo Nacional de Seguridad Social en Salud, de acuerdo con los estudios técnicos del Ministerio de Salud*”.

Recientemente la Ley 1122 de 2007 atribuyó esta competencia al Consejo de Regulación en Salud. En el artículo 7° de esta norma se señala: “*La Comisión de Regulación en Salud ejercerá las siguientes funciones: (...) 3. Definir el valor de la Unidad de Pago por Capitación de cada Régimen, de acuerdo con la presente ley. Si a 31 de diciembre de cada año la Comisión no ha aprobado un incremento en el valor de la UPC, dicho valor se incrementará automáticamente en la inflación causada.*” Como se señaló antes, el retraso en el funcionamiento de la Comisión de Regulación ha llevado a que el Consejo Nacional de Seguridad Social en Salud continúe ejerciendo estas funciones.

Por primera vez el Consejo Nacional de Seguridad Social en Salud fijó la UPC mediante el Acuerdo 007 de 1994 para el régimen contributivo y mediante el Acuerdo 009 del mismo año para el régimen subsidiado. Con posterioridad a estos acuerdos la UPC ha sido modificada periódicamente y también se ha ido fortaleciendo la definición de una metodología para fijar el incremento anual que señala la Ley. Se resalta en este sentido que el Ministerio de Protección Social a través del Programa de Apoyo a la Reforma en Salud PARS, ha adoptado como criterio para el incremento de la UPC la suficiencia de la

financiación del POS.

En este marco se han presentado al Consejo Nacional de Seguridad Social en Salud informes sobre el *Balance Global de Compensación y ajuste de la UPC* en los períodos 2004-2005 y 2005-2006. En estos se hace un estudio de la suficiencia de la UPC para la financiación del POS. Como parte de este mismo esfuerzo se ha evaluado la metodología para estudiar la suficiencia de la UPC mediante la *Evaluación de la metodología balance global de compensación y ajuste de la upc 2005-2006*, el cual es aún preliminar.

En efecto, en el Acuerdo 379, mediante el cual se fijó el valor de la UPC para el año 2008, se valoraron los resultados de estos estudios para tratar de mantener la viabilidad financiera del sistema teniendo en cuenta las diferentes modificaciones que se han introducido en los planes de beneficios.

Si bien es claro que existe un esfuerzo por mejorar la metodología de ajuste de la UPC teniendo en cuenta su capacidad de financiación de los planes de beneficios, es importante reiterar que la actualización integral del POS y el POSS debe asegurar que los servicios médicos sean efectivamente financiados por la UPC de acuerdo con los criterios fijados en la Ley. La UPC debe mantener su capacidad de financiar los planes de beneficios y debe ser definida en concordancia con la actualización del mismo, de lo contrario, se desprotege el derecho a la salud de las personas y se amenaza el goce efectivo del mismo.

Si bien la UPC puede aumentar cada año por razones diversas, es indispensable que los planes de beneficios también evolucionen periódicamente, a través de su actualización, de conformidad con los criterios señalados por la ley con miras a garantizar que dicho plan realmente atenderá las necesidades de salud de las personas y cubrirá las prioridades de salud.

#### 6.1.1.2. Órdenes específicas a impartir.

6.1.1.2.1. Por las anteriores razones en la parte resolutive de esta providencia se ordenará a la Comisión Nacional de Regulación en Salud la actualización integral de los Planes Obligatorios de Salud (POS). En dicha revisión integral deberá definir con claridad qué se encuentra incluido, qué no está incluido y qué se encuentra excluido de los planes de beneficios, teniendo en cuenta los criterios de interpretación del POS adoptados por la Corte, es decir, el principio de integralidad y el principio *pro homine*.

6.1.1.2.2. Así mismo, la decisión de suprimir servicios que antes estaban incluidos en los POS, puede fundamentarse en razones técnicas acerca de la pertinencia de su provisión, como también, en fundamentos relativos a la priorización de los recursos de la salud y a la evaluación del impacto social de la provisión de distintos servicios. Siempre que los fundamentos por los cuales se supriman servicios estén encaminados a la protección efectiva del derecho a la salud según las necesidades de la población, la Sala considera que, *prima*

*facie*, la mencionada eliminación no es regresiva. Lo mismo se aplica en el evento de que el plan de beneficios sea concebido desde una perspectiva distinta a la actual, v.gr., por patologías u otro criterio de inclusión de servicios de salud. Cabe reiterar que el derecho a la salud no es absoluto, sino limitable. Sin embargo, las limitaciones al derecho deben ser razonables y proporcionales. O sea, que si bien el plan de beneficios no tiene que contener una canasta de servicios infinita, la delimitación de los servicios de salud incluidos debe respetar los principios de razonabilidad y proporcionalidad en un contexto de asignación de recursos a las prioridades de la salud. Por ello, es indispensable justificar cuidadosamente cada supresión de servicios como una medida que permite atender mejor nuevas prioridades de salud, no como una reducción del alcance del derecho.

La Comisión deberá (i) establecer cuáles son los servicios que no se encuentran comprendidos en los planes de beneficios pero que van a ser incluidos gradualmente, indicando cuáles son las metas para la ampliación y las fechas en las que serán cumplidas (ii) decidir qué servicios pasan a ser suprimidos de los planes de beneficios, indicando las razones específicas por las cuales se toma dicha decisión en aras de una mayor protección del derecho según las prioridades de salud, y (iii) tener en cuenta para las decisiones de incluir o excluir un servicio, la sostenibilidad del sistema de salud y la financiación del plan de beneficios por la UPC y las demás fuentes de financiación.

Para el cumplimiento de esta orden la Comisión deberá garantizar la participación directa y efectiva de la comunidad médica y de los usuarios del sistema de salud.

6.1.1.2.3. La regulación actual establece mecanismos de representación en los órganos encargados de la regulación en salud. El Consejo Nacional de Seguridad Social en Salud, según el artículo 171 de la Ley 100 de 1993, incluye representación de los diferentes actores interesados en el sector de la salud mediante la asignación de un determinado cupo de personas en el Consejo. Dice la norma: “*Créase el Consejo Nacional de Seguridad Social en Salud, adscrito al Ministerio de Salud, como organismo de dirección del Sistema General de Seguridad Social en Salud, de carácter permanente, conformado por: 1. El Ministro de Salud, quien lo presidirá. || 2. El Ministro de Trabajo y Seguridad Social, o su delegado. || 3. El Ministro de Hacienda y Crédito Público, o su delegado. || 4. Sendos representantes de las entidades departamentales y Municipales de salud. || 5. Dos (2) representantes de los empleadores, uno de los cuales representará la pequeña y mediana Empresa y otras formas asociativas. || 6. Dos (2) representantes por los trabajadores, uno de los cuales representará los pensionados. || 7. El representante legal del Instituto de los Seguros Sociales. || 8. Un (1) representante por las Entidades Promotoras de Salud, diferentes del ISS. || 9. Un (1) representante de las Instituciones Prestadoras de Servicios de Salud. || 10. Un (1) representante de los profesionales del área de la salud, de la asociación mayoritaria. || 11. Un (1) representante de las asociaciones de usuarios de servicios de salud del*

*sector rural.”*

A su vez, la Comisión de Regulación en Salud, órgano creado por la Ley 1122 de 2007, que si bien no ha entrado en funcionamiento será el encargado de asumir las funciones que hoy desempeña el Consejo Nacional de Seguridad Social en Salud, está conformada por un grupo de expertos en el tema de salud que son postulados por los actores interesados en el sector de la salud mediante listas de elegibles. Advierte la Ley que la *“Comisión de Regulación en Salud estará integrada de la siguiente manera: || 1. El Ministro de la Protección Social quien la preside, excepcionalmente podrá delegar sólo en alguno de sus Viceministros. || 2. El Ministro de Hacienda y Crédito Público quien, excepcionalmente podrá delegar sólo en alguno de sus Viceministros. || 3. Cinco Comisionados expertos, designados por el Presidente de la República, de ternas enviadas por diferentes entidades tales como: Asociación Colombiana de Universidades, Centros de Investigación en Salud, Centros de Investigación en Economía de la Salud, Asociaciones de Profesionales de la Salud y Asociaciones de Usuarios debidamente organizados. El Gobierno Nacional reglamentará la materia.”*

Lo anterior muestra, que si bien hay algunos mecanismos de representación en los órganos de regulación en salud, estos no agotan la participación efectiva de quienes tienen un interés directo en el goce efectivo del derecho a la salud que ha de ser protegido por las regulaciones expedidas por tales órganos. Entre ellos sobresalen las organizaciones de usuarios, que son los titulares del derecho a la salud y reciben los servicios dentro del sistema al cual pertenecen así como las organizaciones de médicos, que son quienes deciden científicamente cuál es el servicio de salud adecuado en cada caso para proteger el derecho a la salud y aprecian cotidianamente las implicaciones que tienen las fallas en la regulación y las dificultades de funcionamiento que derivan en las barreras de acceso a los servicios.

La participación de las organizaciones de usuarios y de médicos deberá hacerse de conformidad con las normas que rigen el sistema y en subsidio, con las normas generales que rigen la adopción de decisiones, de alcance general en materia administrativa.

6.1.1.2.4. Los nuevos planes de beneficios serán adoptados de acuerdo con los plazos señalados en la parte resolutive, serán remitidos a la Corte Constitucional y serán comunicados a todas las Entidades Promotoras de Salud para que sean aplicados por todos los Comités Técnico Científicos. Este plazo podrá ampliarse si la Comisión de Regulación en Salud expone razones imperiosas que le impidan cumplir con la fecha indicada.

6.1.1.2.5. Como una medida complementaria, se ordenará a la Comisión de Regulación en Salud la actualización de los Planes Obligatorios de Salud por lo menos una vez al año, con base en los criterios establecidos en la ley. La Comisión presentará un informe anual a la Defensoría del Pueblo y a la Procuraduría General de la Nación indicando, para el respectivo período, (i)

qué se incluyó, (ii) qué no se incluyó de lo solicitado por la comunidad médica y los usuarios, (iii) qué servicios pasan a ser suprimidos de los planes de beneficios, indicando las razones específicas por las cuales se toma dicha decisión, y (iv) la justificación de la decisión en cada caso, con las razones médicas, de salud pública y de sostenibilidad financiera.

6.1.1.2.6. El escenario descrito antes muestra también que persisten en el sistema de salud entidades que vulneran el derecho a la salud de los usuarios, a pesar de sus obligaciones constitucionales, legales y reglamentarias. Si bien adoptar medidas para corregir las fallas estructurales del sistema y de la regulación contribuyen a mejorar el acceso de los usuarios al sistema de salud, es necesario adicionalmente, adoptar medidas para asegurar que la regulación premia al que cumple y sanciona al que incumple, con miras a desestimular las prácticas violatorias de derechos.

Por esta razón, además de las ordenes señaladas antes, se ordenará al Ministerio de la Protección Social y a la Superintendencia Nacional de Salud que adopten las medidas para identificar las Entidades Promotoras de Salud y las Instituciones Prestadoras de Servicios que con mayor frecuencia se niegan a autorizar oportunamente servicios de salud incluidos en el POS o que se *requieran con necesidad*. Con este fin, el Ministerio y la Superintendencia deberán informar a la Defensoría del Pueblo, a la Procuraduría General de la Nación y a la Corte Constitucional (i) cuáles son las Entidades Promotoras de Salud y las Instituciones Prestadoras de Servicios que con mayor frecuencia incurren en prácticas violatorias del derecho a la salud de las personas; (ii) cuáles son las medidas concretas y específicas en relación con éstas entidades que se tomaron en el pasado y las que se adelantan actualmente, en caso de haberlas adoptado.

El informe a cargo, separadamente, de la Superintendencia y el Ministerio deberá ser presentado en la fecha indicada en la parte resolutive de esta providencia.

### **6.1.2. Unificación del Plan de Beneficios. Unificación inmediata en el caso de niños. Diseño de un programa y cronograma en el caso de adultos.**

#### **6.1.2.1. Análisis del problema y de la situación actual**

Si bien la actualización periódica del plan de beneficios y su clasificación, reducirán la incertidumbre que obstaculiza el acceso a los servicios de salud y desestimularán que las personas tengan que acudir a la acción de tutela para poder gozar efectivamente de su derecho a la salud, estas medidas son insuficientes mientras subsista la diferencia entre los beneficios del plan en el régimen contributivo y los del plan subsidiado. Una persona podrá considerar su derecho a la salud comprende los mismos beneficios que el de un conocido, o amigo, sin saber que éste está cobijado por un plan de beneficios más amplio por estar en el régimen contributivo. Partiendo de esa premisa, hoy equivocada, solicitará servicios no incluidos en el POS del régimen

subsidiado.

6.1.2.1.1. Recuerda la Sala que además de la actualización periódica de los Planes de Beneficios, otra de las obligaciones previstas por la Ley 100 de 1993 era su unificación progresiva en los regímenes contributivo y subsidiado, hasta alcanzar la unificación total en el 2001. En efecto el artículo 157 de esa norma indica: *“A partir del año 2.000, todo colombiano deberá estar vinculado al Sistema a través de los regímenes contributivo o subsidiado, en donde progresivamente se unificarán los planes de salud para que todos los habitantes del territorio nacional reciban el Plan Obligatorio de Salud de que habla el artículo 162.”*

A su vez el artículo 162 señala el año 2001 como el término para llevar a cabo la unificación: *“Para los afiliados según las normas del régimen subsidiado, el Consejo Nacional de Seguridad Social en Salud diseñará un programa para que sus beneficiarios alcancen el Plan Obligatorio del Sistema Contributivo, en forma progresiva antes del año 2.001.”*

Estas dos normas, entre otras, fueron demandadas mediante acción pública de inconstitucionalidad bajo el argumento de que la existencia de dos regímenes diferenciados en el sistema de salud, contributivo y subsidiado, resultaba violatoria del derecho a la igualdad. En la sentencia C-130 de 2002 la Corte declaró la exequibilidad de estas normas por el cargo señalado. En la decisión se reconoció la existencia de dos regímenes diferenciados los cuales, a juicio de esta Corporación, se encontraban dentro del margen de configuración del legislador para diseñar el sistema de salud conforme a lo prescrito en la Constitución. Adicionalmente, indicó que la diferenciación de los regímenes se fundaba en que no se trataba de situaciones iguales ya que, mientras uno se financiaba con los recursos de sus miembros, el otro se financiaba con recursos de solidaridad.

La Corte Constitucional además reconoció que resultaba altamente deseable una cobertura universal e igual para todos los colombianos, lo cual sin embargo, de acuerdo con el carácter progresivo de la ampliación de estos derechos, debía someterse al desarrollo progresivo mediante planes sujetos a la disponibilidad presupuestal. Con todo, indicó que el carácter progresivo de la ampliación de la cobertura, tanto en la universalización como en la unificación de los beneficios, no podía ser indefinida ya que una demora muy larga, implicaría la vulneración de las disposiciones constitucionales. Dijo al respecto,

*“La consagración del derecho a la salud y la aplicación al sistema general de salud de los principios de solidaridad, universalidad e integralidad, no apareja la obligación del Estado de diseñar un sistema general de seguridad social que esté en capacidad, de una sola vez, de cubrir integralmente y en óptimas condiciones, todas las eventuales contingencias que puedan afectar la salud de cada uno de los habitantes del territorio. La universalidad significa que*

*el servicio debe cubrir a todas las personas que habitan el territorio nacional. Sin embargo, es claro que ello se debe hacer en forma gradual y progresiva, pues tratándose de derechos prestacionales los recursos del Estado son limitados, de ahí la existencia del principio de solidaridad, sin el cual la población de bajos recursos o sin ellos no podría acceder a tales servicios.*

*Para la Corte no hay duda que estos pronunciamientos aún continúan teniendo vigencia, sin embargo es importante añadir que si bien el desarrollo progresivo de la seguridad social para lograr la cobertura total de los servicios de salud para todos los habitantes del territorio colombiano debe hacerse gradualmente, para lo cual los recursos existentes en un momento dado juegan un papel determinante, esto no puede ser obstáculo para lograr esa meta en el menor tiempo posible, pues de no cumplirse con prontitud se estarían desconociendo los fines esenciales del Estado y, por ende, en flagrante violación de los artículos 48 y 49 del Estatuto Supremo.*

*En consecuencia, es deber del Congreso y del Gobierno adoptar todas las medidas económicas, políticas y administrativas para alcanzar en un término breve la cobertura total de los servicios de salud para toda la población colombiana, destinando cada año mayores recursos para hacer efectivo el derecho irrenunciable a la salud, avanzando en forma gradual pero rápida y eficaz para lograr en un tiempo razonable el bienestar social de todos. De ahí que la Corte Interamericana de Derechos Humanos haya reiterado, refiriéndose al derecho a la salud, que si bien el nivel de desarrollo juega un papel fundamental para ese fin, ello “no se debe entender como un factor que excluya el deber del Estado de implementar estos derechos en la mayor medida de sus posibilidades. El principio de progresividad exige mas bien que, a medida que mejora el nivel de desarrollo de un Estado, mejore el nivel de compromiso de garantizar los derechos económicos, sociales y culturales.”*

No existen actualmente programas ni cronogramas que muestren un esfuerzo para avanzar en la unificación de los planes de beneficios de los regímenes contributivo y subsidiado. En los primeros acuerdos del Consejo Nacional de Seguridad Social en Salud este era un tema recurrente. En el Acuerdo 001 del Consejo Nacional de Seguridad Social en Salud adoptado el 24 de junio de 1994 mediante el cual se dio su propio reglamento, reconoció entre sus funciones “1. Diseñar el programa que permita a los afiliados del régimen subsidiado alcanzar el Plan Obligatorio de Salud del sistema contributivo, en forma progresiva antes del año 2.001.”; en el Acuerdo 009 del 21 de julio de 1994 fijó los lineamientos para un plan de unificación en los siguientes términos: “Artículo 6o. Aprobar el proceso de actualización del POS-S de la siguiente manera: mantener el Plan inicial sin modificaciones en los dos

*primeros años. Al cabo del tercer año, incorporar integralmente el conjunto de intervenciones de mayor costo asegurables que hacen parte del POS del sistema contributivo. Y entre 1998 y el año 2001, incorporar el resto de las intervenciones que hacen parte de los conglomerados típicos de intervenciones asociadas con el segundo y tercer nivel.”*

En la misma línea, mediante el Acuerdo 015 del 9 de febrero de 1995 el Consejo Nacional de Seguridad Social en Salud acordó lo siguiente: “*Artículo Primero. Recomendar el incremento de la Unidad de Pago por Capitación U.P.C. del régimen subsidiado con el propósito de alcanzar la integralidad en la cobertura de servicios para la población más pobre y vulnerable del país, de acuerdo con la viabilidad financiera aprobada por el Ministerio de Hacienda, || Artículo Segundo. Recomendar el incremento de los beneficios cubiertos por el POS Subsidiado, de modo que este se acerque lo más posible en servicios a los contemplados en el POS Contributivo, de acuerdo con la factibilidad determinada por el Artículo 1o. del presente Acuerdo.”*

Recientemente, la Ley 1122 de 2007, en el artículo 14, nuevamente llamó la atención sobre la necesidad de unificar los planes de beneficios y en el literal e indicó que “[l]a Comisión de Regulación en Salud actualizará anualmente el Plan Obligatorio de Salud buscando el acercamiento progresivo de los contenidos de los planes de los dos regímenes con tendencia hacia el que se encuentra previsto para el régimen contributivo.”

A pesar de estas intenciones, derivadas de claros mandatos legales y avaladas explícitamente por el Consejo Nacional de Seguridad Social en Salud, hasta la fecha no se ha realizado un programa que defina metas específicas para el acercamiento progresivo de los dos planes ni un cronograma que lo respalde, estableciendo plazos precisos para el cumplimiento de cada meta. En otras palabras, actualmente existe una violación de la obligación constitucional de cumplimiento progresivo a cargo del Estado consistente en unificar los planes obligatorios de beneficios, para garantizar el derecho a la salud en condiciones de equidad. Si bien se trata de una obligación de cumplimiento progresivo, actualmente el Estado desconoce el mínimo grado de cumplimiento de la misma puesto que no ha adoptado un programa, con su respectivo cronograma, para avanzar en la unificación de los planes de beneficios. Lo anterior, a pesar de que la política pública se encontraba delineada en términos generales por la ley, fijándose allí también el plazo para el cumplimiento de la meta de unificación de los planes de beneficios. El Estado incumplió las obligaciones y plazos trazados y, posteriormente, no fijó un nuevo plazo ni cronograma alguno.

Esta decisión de carácter regresivo, además de contribuir a la confusión en los usuarios sobre cuáles son las prestaciones de salud a las que tienen derecho – asunto que se ha venido resolviendo caso por caso mediante acción de tutela– ha implicado en la práctica la prolongación de las privaciones y limitaciones al derecho a la salud de las personas más necesitadas en el sistema (los beneficiarios del régimen subsidiado), y ha implicado mantener las barreras

para el acceso a algunos de los servicios de salud requeridos a parte de la población más necesitada.

No corresponde a la Corte Constitucional fijar las metas ni el cronograma para la unificación de los planes de beneficios, pero sí debe instar a las autoridades competentes para que, con base en las prioridades epidemiológicas, las necesidades de salud de los que pertenecen al régimen subsidiado y las consideraciones de financiación relevantes, diseñe un plan que permita de manera real alcanzar esta meta. La progresividad de un derecho no justifica el estancamiento ni mucho menos relegar al olvido el mandato de unificación de los planes de beneficios para evitar que las personas de escasos recursos sean sujetos de inferior protección constitucional, lo cual es abiertamente inadmisibles en un Estado Social de Derecho.

Esta consideración es grave si se tiene en cuenta las amplias diferencias que persisten dentro de ambos regímenes. Por ejemplo, en la sentencia T- 754 de 2005 la Corte constató que la hemofilia era una enfermedad que no se encontraba prevista en el Plan Obligatorio de Salud del Régimen subsidiado, aún cuando sus características claramente indicaban que se trataba de una enfermedad ruinosa que debería recibir el tratamiento necesario. Sobre la caracterización de la hemofilia se indicó que es una: “(...) *enfermedad ruinosa, cuya característica principal es la cronicidad de los síntomas, la necesidad de otorgar tratamientos especializados y, el alto costo de los medicamentos, así como de los procedimientos que pueden ser implementados para enfrentarla*”.

En sentencia T-652 de 2006, la Corte analizó el caso de una beneficiaria del régimen subsidiado, quien padecía de leucemia linfoblástica aguda L1 y se encontraba en estado de embarazo. A pesar de la enfermedad la accionante pudo dar a luz. Sin embargo, un mes después falleció su hijo. Ante el crítico estado de salud de la usuaria, su médico tratante le ordenó un trasplante de médula ósea. No obstante, Caja Salud ARS negó el procedimiento requerido en razón de que el mismo sólo se encontraba incluido en el POS contributivo, pero no en el subsidiado. En esta oportunidad, el Consejo Nacional de Seguridad Social en Salud, vinculado por el juez de tutela al proceso, señaló que “*el trasplante de médula ósea está descrito con código 7800 en el artículo No 62 de la citada Resolución 5261 de 1995 sin que la norma precise, delimite o restrinja su cobertura a diagnóstico alguno; por lo tanto se considera que dicho tratamiento está cubierto para los pacientes de Cáncer en el Régimen Subsidiado si para el caso dado el médico tratante respectivo lo considera necesario*”. Con base en estas afirmaciones, la Corte consideró que en el caso concreto, teniendo en cuenta que la enfermedad que se pretendía tratar con el trasplante era un cáncer, afirmó que el trasplante de médula ósea estaba incluido en el POSS.

6.1.2.1.2. La necesidad de unificar los planes de beneficios es aún más imperiosa en el caso de los niños y las niñas ya que, como se señaló en esta providencia (ver sección 4.5.), la Constitución los reconoce como sujetos de

especial protección y consagra de manera autónoma su derecho fundamental a la salud (art. 44, CP).

Son frecuentes las tutelas en las cuales un menor beneficiario del régimen subsidiado acude a la acción de tutela para lograr acceder a servicios de salud que requiere con necesidad (*ver apartado 4.4.3*). Por ejemplo en sentencia T-134 de 2002, esta Corporación estudió el caso de un menor de 17 años que padecía de “trastorno depresivo mayor”, quien tras un intento de suicidio fue internado en el Hospital San Diego de Cereté (Córdoba) en donde le prestaron servicios de urgencia. Sin embargo, no fue remitido a tratamiento psiquiátrico, tal como lo requería el menor, por encontrarse fuera del POS subsidiado. La Corte protegió los derechos del menor y ordenó, además de la prestación de los servicios requeridos, el acompañamiento de la familia en el acceso efectivo a los servicios.

También en la sentencia T-913 de 2007, la Corte estudió el caso de la menor Miller Johana Rodríguez de 12 años de edad, quien era beneficiaria del Sisben y padecía de perforación timpánica + otitis media crónica, por lo que requería consulta y tratamiento con médico especialista en Otorrinolaringología. No obstante, la ARS Emdisalud no autorizó la valoración y el tratamiento por especialista, toda vez que se encontraba fuera del POS subsidiado. En esa oportunidad la Corte protegió los derechos de la menor y ordenó la prestación de los servicios.

En ambos casos, tanto los servicios de atención siquiátrica como los servicios de especialista en otorrinolaringología, se encuentran incluidos en el POS del régimen contributivo por lo que son sólo los menores más pobres, los que se encuentran en el régimen subsidiado, los que deben acudir a la acción de tutela para acceder a los mismos.

#### 6.1.2.2. *Órdenes específicas a impartir.*

Por las anteriores razones, en la parte resolutive de esta providencia se ordenará la adopción de medidas para que se unifiquen los planes de beneficios, en relación con los niños y las niñas en el corto plazo, y para los adultos, en el momento en que las autoridades competentes lo consideren viable pero con sujeción a un programa y un cronograma que deberán ser adoptados en la fecha señalada en la parte resolutive de esta providencia.

6.1.2.2.1. Las ordenes serán impartidas a la Comisión de Regulación en Salud ya que este es el órgano que según la Ley 1122 de 2007 asumirá las funciones que actualmente ejerce el Consejo Nacional de Seguridad Social en Salud una vez entre en funcionamiento. De acuerdo con la Ley, el “*Consejo Nacional de Seguridad Social en Salud mantendrá vigentes sus funciones establecidas en la Ley 100 de 1993, mientras no entre en funcionamiento la Comisión de Regulación en Salud, CRES*” (artículo 3, Ley 1122 de 2007).

Se ordenará entonces, por una parte, a la Comisión de Regulación en Salud

unificar los planes de beneficios para los niños y las niñas del régimen contributivo y del subsidiado, teniendo en cuenta los ajustes necesarios a la UPC subsidiada de los niños y las niñas para garantizar la financiación de la ampliación en la cobertura. Si para la fecha señalada en la parte resolutive de esta providencia no se hayan adoptado las medidas necesarias para la unificación del plan de beneficios de los niños y las niñas, se entenderá que el plan obligatorio de salud del régimen contributivo cubre también a los niños y las niñas del régimen subsidiado.

Un informe sobre el proceso de cumplimiento de esta orden deberá ser remitido a la Corte Constitucional y comunicado al Instituto Colombiano de Bienestar Familiar y a la Defensoría del Pueblo.

6.1.2.2.2. Por otra parte, se ordenará a la misma entidad que adopte un programa y un cronograma para la unificación gradual y sostenible de los planes de beneficios del régimen contributivo y del régimen subsidiado teniendo en cuenta: (i) las prioridades de la población según estudios epidemiológicos, (ii) la sostenibilidad financiera de la ampliación de la cobertura y su financiación por la UPC y las demás fuentes de financiación previstas por el sistema vigente.

Ahora bien, han de hacerse dos anotaciones acerca de las órdenes descritas en el párrafo anterior. En primer lugar, el buen funcionamiento del sistema de salud depende de su adecuada administración, lo que a su vez obedece a que el Estado regule adecuadamente el equilibrio entre los ingresos de recursos del sistema por un lado, y la prestación de servicios de calidad por el otro. Así, no sólo es legítimo sino es necesario que se adopten medidas para racionalizar el acceso a los servicios establecidos en los planes obligatorios de salud, siempre tomando en cuenta la satisfacción del derecho a la salud y el efectivo acceso a los servicios que sean requeridos con necesidad.

En segundo lugar, la decisión tomada en la ley y cuyo cumplimiento se ordena en la presente sentencia, de unificar los planes de beneficios de los regímenes contributivo y subsidiado, puede generar incentivos nocivos en la acción colectiva de los afiliados. En efecto, el que los planes de beneficios de los dos regímenes tiendan a ser iguales puede desincentivar a algunos particulares a pertenecer al sistema contributivo, teniendo en cuenta que en el subsidiado “pagan menos”. Para enfrentar dicho problema, de tal manera que el régimen subsidiado solo sea para aquellos que no cuentan con los recursos para participar en el contributivo, son necesarias soluciones públicas que habrán de ser diseñadas, aplicadas y evaluadas por las entidades competentes. Dentro de estas soluciones se pueden incluir, entre otras, sanciones para aquellos que por medio de engaños muestren ingresos inferiores a los que detentan en la realidad, regulaciones dirigidas a la adopción de alicientes que incentiven el pago de cotizaciones por quienes tienen capacidad económica y la correspondiente divulgación de dichas políticas. En todo caso, estas medidas deben prever la posibilidad de moverse de un régimen a otro durante los ciclos laborales y no podrán impedir que las personas que estén en el régimen

contributivo puedan pasar al subsidiado en los casos en los que económicamente lo requieran.

En vista de las aclaraciones anteriores, el programa de unificación deberá adicionalmente (iii) prever la definición de mecanismos para racionalizar el acceso a los servicios de salud por parte de los usuarios, asegurando que las necesidades y las prioridades en salud sean atendidas y sin que en ningún caso se impida el acceso a servicios de salud requeridos con necesidad, (iv) identificar los factores que desestiman el pago de cotizaciones por parte de los usuarios y prever la adopción de las medidas necesarias para estimular que quienes tienen capacidad económica efectivamente coticen garantizando que quien pasa del régimen subsidiado al régimen contributivo pueda regresar al subsidiado de manera ágil cuando la disminución de su ingreso o de situación socioeconómica así lo exijan.

La Comisión de Regulación en Salud deberá remitir a la Corte Constitucional, el programa y el cronograma para la unificación de los planes de beneficios la fecha señalada en la parte resolutive de esta providencia y deberá presentarse un informe periódico sobre su cumplimiento.

En la ejecución del programa y el cronograma para la unificación de los planes de beneficios, la Comisión ofrecerá oportunidades suficientes de participación directa y efectiva a las organizaciones que representen los intereses de los usuarios del sistema de salud y de la comunidad médica.

### **6.1.3. Ampliación de las competencias del CTC para que también se pronuncie sobre solicitudes de servicios médicos diferentes a medicamentos en cualquiera de los regímenes.**

#### *6.1.3.1. Análisis del problema y de la situación actual.*

6.1.3.1.1. De acuerdo con la jurisprudencia constitucional, una EPS desconoce el derecho a la salud de una persona al negarle un servicio de salud requerido, aduciendo únicamente que éste no está incluido en el plan obligatorio de salud. Como se dijo, una entidad encargada de asegurar la prestación de un servicio de salud, viola el derecho a la salud al dejar de autorizar la prestación de un servicio que no está incluido en el plan obligatorio, pero se *requiere* (de su prestación depende conservar la salud, la vida, la dignidad o la integridad de la persona). También viola el derecho a la salud cuando aprueba el servicio que se *requiere*, pero condiciona su práctica al pago de una suma de dinero, a pesar de que la persona lo requiere *con necesidad* (la persona no pueda proveérselo por sí misma). Para proceder adecuadamente, la entidad debe tener claridad con relación a cuáles son los contenidos incluidos en el plan de beneficios (*ver apartado 4.4.3.*).

Si el servicio no incluido en el plan de beneficios es un medicamento, el procedimiento que ha de seguir el médico tratante para solicitar su aprobación por el Comité Técnico Científico está establecido. Pero no ocurre así con los

demás servicios de salud requeridos. La ausencia de regulación de un trámite interno ante las EPS de los servicios de salud no incluidos en el POS, diferentes a medicamentos —procedimientos, actividades e intervenciones—, ha incrementado el número de tutelas, al ser éste el único mecanismo mediante el cual pueden los pacientes solicitar ser protegidos en tales casos, y al considerar las EPS necesario el procedimiento de acción de tutela para que el Estado reconozca el pago del costo del servicio en cuestión, que por no estar incluido en el POS, no se encuentra financiado por la UPC.

La necesidad de las personas de recurrir a la acción de tutela para acceder a los servicios de salud que requieren es un hecho notorio que ha sido reseñado por los medios de comunicación en varias ocasiones.

Para la Corte, es claro que una de las principales razones por las cuales se sigue desconociendo sistemáticamente el derecho a acceder a los servicios de salud requeridos, exigiendo el ‘trámite previo’ de interponer una acción de tutela, es precisamente porque no existe ninguna otra vía legal o reglamentaria para acceder a estos servicios, que como se indicó, hacen parte central del derecho fundamental a la salud.

Es claro que en la actualidad no existe ningún procedimiento establecido para que las EPS puedan tramitar las autorizaciones de servicios de salud no incluidos en el POS, cuando éstos son diferentes a un medicamento. Las entidades de salud no tienen mecanismo reglamentario alguno para poder adelantar estas solicitudes, y por tanto, no podrían presentar posteriormente su solicitud de un recobro ante el Fosyga. En la medida en que los Comités Técnicos Científicos sólo autorizan medicamentos, la única forma por la cual puede una EPS presentar ante el Fosyga el recobro de un servicio no POS, que hubiese sido autorizado, es que éste haya sido ordenado en la sentencia por un juez de tutela.

6.1.3.1.2. Así pues, la *regulación actualmente estimula a las personas a recurrir a la acción de tutela*, como único medio posible de defensa, para asegurar que se les garantice su derecho fundamental a acceder a un servicio de salud que se requieran con necesidad. Es uno de los casos en los que claramente la regulación convierte a la acción de tutela en un ‘*prerrequisito de trámite*’ para acceder a un servicio de salud. Esta *laguna* en la regulación constituye una clara desprotección del derecho a la salud de las personas, pues es una barrera al acceso a los servicios que se *requieren*, resultante de la regulación diseñada y expedida por la autoridad competente.

6.1.3.1.3. Los Comités Técnico Científicos son órganos de las Entidades Promotoras de Salud (EPS), del régimen contributivo y subsidiado, así como de las Entidades Obligadas a Compensar (EOC), encargados de (i) analizar las solicitudes presentadas por los médicos tratantes para el suministro de medicamentos por fuera del listado del POS, (ii) justificar técnicamente las decisiones adoptadas en relación con las solicitudes, (iii) evaluar trimestralmente los casos en los cuales el suministro del medicamento fue

autorizado y hacer seguimiento al resultado de la salud de dichos pacientes y, por último, (vi) presentar informes relacionados con su objeto y funciones al Ministerio de Protección Social y a las autoridades competentes.

La regulación busca que las decisiones del Comité tengan un contenido mínimo de conocimiento técnico, y que sean neutras e imparciales. En cuanto a los miembros del Comité, se tiene que además de la exigencia de que al menos uno de ellos sea médico, se exige que aquellos que son representantes de EPS o IPS, sean médicos, químicos farmacéuticos o profesionales de la salud. También, se exige a todos, la firma de una carta de compromiso en la cual manifiesten que no recibirán beneficios de productoras o distribuidoras de medicamentos durante el tiempo en el que participen en el Comité y no tendrán ningún vínculo con estas compañías. También se prohíbe que el representante de los usuarios sea empleado de la EPS. El procedimiento de selección de los miembros, contempla la realización de una convocatoria abierta que incluye las IPS, las asociaciones de usuarios y los usuarios, con miras a garantizar una participación más amplia de todos los sectores afectados con las decisiones del Comité.

El procedimiento para tramitar la solicitud de autorización de un medicamento no incluido en el POS inicia con la presentación de la solicitud ante el Comité Técnico Científico por el médico tratante, no por el usuario, mediante un escrito en el que justifique el medicamento y aportando la documentación adicional que considere necesaria.

El Comité, en la semana siguiente a la presentación de la solicitud, debe establecer la pertinencia de la misma y decidir la petición. Sin embargo, el Comité tiene la posibilidad de solicitar información adicional al médico tratante o bien solicitar el concepto de otro especialista, caso en el cual cuenta con una semana adicional. Esta facultad del Comité, no debe convertirse en una posibilidad de dilación de las autorizaciones, sino en una oportunidad de proferir decisiones mejor fundadas en criterios científicos. En relación con este punto ha dicho la Corte que “[s]i el Comité necesita conocer algo respecto a la situación del paciente, o requiere algún tipo de información de carácter científico para poder autorizar un tratamiento, lo que corresponde no es negarlo, dejando los derechos fundamentales de las personas desprotegidos. Su deber es tomar, a la mayor brevedad y sin que ello pueda poner en peligro al paciente, las medidas que sean del caso para superar las deficiencias en información y aprobar o negar definitivamente la solicitud, según sea lo que corresponda en cada evento.”

La decisión en la cual el Comité autoriza o no un medicamento debe constar en un acta, debe estar soportada en documentos médicos (exámenes, historia clínica, conceptos de especialistas, etc.) y debe ser justificada de manera técnica, esto es, con criterios médicos y científicos, lo cual excluye las decisiones justificadas en razones meramente administrativas. Este procedimiento, sin embargo, puede ser inaplicable cuando esté en riesgo la vida del paciente, caso en el cual el médico tratante podrá suministrar el

medicamento y presentar la solicitud después, con la única finalidad de que el Comité decida si se continúa con el tratamiento o no. Las reuniones del Comité deberán realizarse con la periodicidad requerida para poder tramitar todas las solicitudes oportunamente.

6.1.3.1.4. Ahora bien, la Resolución 2933 de 2006, en el artículo 6°, recoge los criterios que deben tener en cuenta los Comités Técnico Científicos para autorizar medicamentos no incluidos en el POS. Señala la norma,

*“Artículo 6 ° - .El Comité Técnico Científico, deberá tener en cuenta para la autorización de los medicamentos no incluidos en el Manual de Medicamentos del Plan Obligatorio de Salud los siguientes criterios:*

*a) La prescripción de medicamentos no incluidos en el Manual de Medicamentos del Plan Obligatorio de Salud, sólo podrá realizarse por el personal autorizado de la EPS, EOC o ARS. No se tendrán como válidas transcripciones de prescripciones de profesionales que no pertenezcan a la red de servicios de cada una de ellas.*

*b) Sólo podrán prescribirse medicamentos que se encuentren debidamente autorizados para su comercialización y expendio en el país. De igual forma la prescripción del medicamento deberá coincidir con las indicaciones terapéuticas que hayan sido aprobadas por el Invima en el registro sanitario otorgado al producto.*

*c) La prescripción de estos medicamentos será consecuencia de haber utilizado y agotado las posibilidades terapéuticas del Manual de Medicamentos del Plan Obligatorio de Salud, sin obtener respuesta clínica y/o paraclínica satisfactoria en el término previsto de sus indicaciones, o de observar reacciones adversas o intolerancia por el paciente, o porque existan indicaciones expresas. De lo anterior se deberá dejar constancia en la historia clínica.*

*d) Debe existir un riesgo inminente para la vida y salud del paciente, lo cual debe ser demostrable y constar en la historia clínica respectiva.”*

6.1.3.1.5. La jurisprudencia de la Corte se ha pronunciado con relación a la forma en que deben ser interpretados estos criterios. Sobre el primero ha señalado lo siguiente: *“Según el primer criterio de la norma es preciso que la prescripción del medicamento lo haga personal autorizado, el cual, como lo ha señalado la jurisprudencia constitucional, es el médico tratante, por cuanto es la persona que (1) tiene conocimientos médicos de la especialidad correspondiente, (2) dispone de información específica del caso del paciente que requiere el medicamento y (3) está formalmente vinculado a la E.P.S.*

*Ahora bien, lo anterior implica que no es el Comité Técnico Científico quien tiene la facultad de recetar medicamentos a los pacientes, su función se limita a autorizar dichas órdenes.”*

*En cuanto al segundo se ha indicado que “(...) busca evitar que se utilicen medicamentos que se encuentren en fase experimental, respecto de los cuales existe gran incertidumbre sobre su impacto en la salud del paciente.”*

*Por su parte se ha señalado que el tercer criterio “(...) coincide con la regla constitucional según la cual se tiene derecho a recibir un tratamiento o un medicamento excluido del P.O.S., pero en la medida que no exista un reemplazo. El Comité no puede autorizar el suministro de un medicamento si lo que se busca con éste se puede lograr con otro medicamento que sí se encuentra presupuestado administrativa y financieramente por el sistema de salud. Ahora bien, la regla no se fija de manera rígida; la enunciación del criterio señala que en todo caso el medicamento sustituto (1) debe ser eficaz (que se obtenga respuesta clínica y/o paraclínica satisfactoria en el término previsto de sus indicaciones), y (2) no puede generar daños (contraindicaciones o reacciones adversas)”.*

*Finalmente, frente al cuarto criterio se ha dicho que “(...) refleja la regla constitucional según la cual las personas tienen derecho a que se les preste la atención médica de forma eficaz y prioritaria, cuando de ello dependa su vida y su salud. Aunque en términos generales coincide con lo señalado por la jurisprudencia constitucional, se ha decidido inaplicarlo en ciertos casos por considerar que su redacción es restrictiva, pues excluye la protección en eventualidades que desde una perspectiva constitucional sí se encuentran contemplados, como cuando está comprometida la dignidad de la persona. || Por otra parte cabe resaltar que el criterio indica que el riesgo inminente debe ser (1) demostrable y (2) constar en la historia clínica. Es decir, el que la vida de un paciente corra peligro o no es un hecho que debe demostrarse científicamente. El Comité Técnico Científico no es entonces, la autoridad médica competente para dictaminar si la vida del paciente está o no en riesgo, su función se limita a constatar que tal diagnóstico fue proferido por el médico tratante, el cual debe ser un reflejo del estado de salud que se prueba por medio de la historia clínica.”*

*Además de estas consideraciones es necesario tener en cuenta la interpretación que la Corte Constitucional le ha dado al concepto de ‘riesgo inminente para la vida y la salud del paciente’, ya que éste no se restringe a la comprensión de la vida en un sentido estrictamente fisiológico. Ha señalado esta Corporación que la “Carta Política garantiza a los colombianos el derecho a gozar de una vida digna, lo cual comprende un ámbito de la existencia más amplio que el físico. Frente a este tipo de eventos, y después de valorar las circunstancias de cada caso, el juez de tutela debe inaplicar la norma regulatoria, para pasar a aplicar, directamente, la Constitución. Indicar que la vida no corre un riesgo inminente no es, entonces, una razón válida para negar el medicamento ordenado por el médico tratante. En especial, cuando*

*el paciente es un niño cuyo derecho es calificado por la Constitución de fundamental (artículo 44, C.P.).”*

6.1.3.1.6. Con todo, el Comité Técnico Científico no ha aplicado entre los criterios para autorizar un servicio de salud la capacidad económica del usuario. En la jurisprudencia de la Corte Constitucional, por el contrario, éste sí ha sido un criterio relevante para determinar si en un caso concreto se debe ordenar o no el suministro de un servicio médico, como se señaló previamente (ver apartado 4.4.5.). En aquellos casos en los que el usuario solicita un servicio médico no incluido en el POS, pero cuenta con capacidad económica para costear lo que le corresponda pagar, la Corte Constitucional ha negado su autorización con cargo a los recursos del Fosyga. El concepto de capacidad económica para cubrir un servicio médico es relativo, y depende del nivel de ingresos del solicitante y del costo del servicio requerido (ver apartado 4.4.5.). Los criterios inflexibles para la determinación de la capacidad económica para cubrir un servicio médico, como el Ingreso Base de Cotización (IBC), resultan insuficientes a la luz de la jurisprudencia constitucional. Por ejemplo en la sentencia T-959 de 2004 se estudió el caso de una menor de tres años que padecía diabetes *mellitus* tipo uno y requería, como parte de su tratamiento, tirillas de glucometría para medir el nivel de azúcar en su sangre. Estas no estaban incluidas en el POS pero los padres de la menor tenían capacidad económica para asumir su costo. Dijo la Corte en aquella ocasión,

*“Al revisar la descripción presentada en este proceso de los ingresos y gastos de la familia Rodríguez Anzola se concluye que sus ingresos mensuales son suficientes –sin que se haya desvirtuado ello por la actora y sin que ello signifique que en el futuro su situación económica pueda cambiar– para poder cubrir los costos de los instrumentos médicos requeridos por la menor, que hacen parte del tratamiento médico que le fue prescrito.*

*Esta Sala de Revisión no desconoce que, de acuerdo con la descripción de la capacidad económica de esta familia, cubrir los costos mensuales de las jeringas y de las tirillas que requiere su hija, implica una disminución del dinero disponible para el sostenimiento de la pareja, que les obliga a hacer un esfuerzo en este sentido, pero que en todo caso, no los está llevando a una situación que imposibilite su subsistencia digna.*

*Los jueces de tutela y los accionantes no deben olvidar que los recursos del Fosyga, están destinados exclusivamente para las personas que les es imposible, por sus propios medios económicos, acceder a tratamientos, medicamentos o pruebas de diagnóstico excluidos del P.O.S, que requieran con urgencia para salvaguardar su vida y su integridad.*

*Dar un uso distinto a estos recursos o incluir dentro de los*

*beneficiarios a quienes no cumplan con los estrictos requisitos establecidos, implica necesariamente la exclusión en la asignación de recursos escasos de algunos que sí requieren con urgencia de esta ayuda estatal, poniendo con esto en serio peligro sus derechos fundamentales a la vida y a la integridad.”*

*En ningún caso la capacidad económica de un usuario puede ser un obstáculo para acceder a los servicios de salud. Por esta razón, si bien se reconoce que los usuarios del sistema de salud deben hacer un esfuerzo por asumir el costo de los servicios que se encuentran excluidos de los planes de beneficios cuando tienen capacidad para hacerlo, cuando existan dudas acerca de una persona puede asumir o no el costo de un servicio médico, se debe ordenar su provisión como garantía del goce efectivo del derecho a la salud. Por ejemplo en la sentencia T-899 de 2007. La Corte estudió el caso de una mujer que padecía un trastorno bipolar severo del cual había presentado varios episodios de crisis que implicaron que fuera recluida en un hospital psiquiátrico por largas temporadas. Desde hacía aproximadamente 10 años había logrado controlar la enfermedad con el tratamiento prescrito por un médico adscrito a la red de su empresa de medicina prepagada y adscrito también a la red de la EPS. Los medicamentos se encontraban excluidos del POS por lo que había asumido su costo directamente durante varios años, sin embargo, para el momento en el que interpuso la tutela su situación económica había cambiado y se había tornado tan crítica que iba a tener que dejar el tratamiento, en contra de las indicaciones del médico tratante y bajo la advertencia de que no era procedente cambiar el medicamento. La accionante trabajaba y tenía algunos ingresos pero estos no eran claramente suficientes para cubrir el tratamiento y suspenderlo afectaría seriamente su salud. En esa oportunidad señaló la Corte que los “anteriores datos indican que este es un caso límite, en el cual existe alguna capacidad económica pero no es claro si la misma resulta suficiente para cubrir el costo del tratamiento ordenado por el médico tratante y no poner en riesgo su derecho fundamental a la salud y a recibir tratamiento integral para superar su discapacidad. En este caso la duda es aún más acentuada porque se trata de un tratamiento acerca de cuya duración se desconoce el término, ya que podría ser para toda la vida y los costos podrían variar dependiendo de las necesidades del tratamiento.”*

Subraya la Corte que la resolución del desacuerdo entre el médico tratante y el Comité Técnico Científico puede basarse en razones médico-científicas, caso en el cual la intervención judicial será menos pertinente. En efecto, en la jurisprudencia constitucional se ha reiterado que cuando lo prescrito por el médico tratante es negado con base en razones administrativas, el juez de tutela debe darle prevalencia al médico tratante. Otra sería la situación si el Comité aportara razones científicas enderezadas, no a obstaculizar el servicio de salud idóneo para determinado usuario, sino a lograr la adecuada protección del derecho a la salud a partir de criterios médico-científicos.

Por supuesto, si el desacuerdo no es resuelto en el plano científico y el médico tratante insiste en que el servicio de salud idóneo para su paciente no es el que

autoriza el Comité Técnico Científico, será necesario prever un mecanismo de resolución definitiva del conflicto. Mientras este no exista, el juez de tutela continuará aplicando la jurisprudencia constitucional según la cual el juez no debe sustituir a los médicos sino ordenar que prevalezca lo prescrito por el médico tratante.

6.1.3.1.7. Ahora bien, la regulación actual circunscribe la competencia del Comité Técnico Científico a la autorización de medicamentos no incluidos en el listado de medicamentos del Plan Obligatorio de Salud, salvo si se trata de tratamientos experimentales o de medicamentos para la atención de las actividades, procedimientos e intervenciones que se encuentren expresamente excluidos de los Planes de Beneficios conforme el artículo 18 de la Resolución 5261 de 1994.

Según esto, todos aquellos servicios médicos que no son medicamentos y todos aquellos medicamentos para la atención de actividades, procedimientos e intervenciones expresamente excluidas del POS, tampoco pueden ser ordenados por el Comité Técnico Científico. En relación con los servicios de salud que no son medicamentos, la regulación guarda silencio y no establece un sistema parecido al creado para autorizar los medicamentos mediante el Comité Técnico Científico, pero tampoco establece reglas que impidan o prohíban expresamente reconocerlos, a pesar de saber que muchos de estos servicios, en ambos regímenes, pueden y suelen ser ordenados por jueces de tutela. Sólo en un párrafo de un artículo de un Decreto expedido hace más de una década (Decreto 806 de 1998) se esbozó una alternativa que no fue regulada, retomada o llevada a la práctica.

6.1.3.1.8. En suma, la ausencia de regulación clara que permita hacer efectivos los derechos de los usuarios cuando requieren un servicio de salud diferente a un medicamento no incluido en el POS es una de las razones por las cuales la tutela se ha convertido en el mecanismo generalizado para acceder a servicios de salud no incluidos en el POS ordenados por el médico tratante, e incluso muchas veces a medicamentos cuando el médico tratante no presenta la solicitud ante el Comité Técnico Científico.

#### 6.1.3.2. *Ordenes específicas a impartir*

6.1.3.2.1. Por las anteriores razones, en la parte resolutive de esta providencia, se ordenará a la Comisión de Regulación en Salud que adopte las medidas necesarias para regular el trámite interno que debe adelantar el médico tratante para que la EPS autorice directamente tanto los servicios de salud no incluidos en el plan obligatorio de salud (contributivo o subsidiado), diferente a un medicamento, como los medicamentos para la atención de las actividades, procedimientos e intervenciones explícitamente excluidas del Plan Obligatorio de Salud, cuando estas sean autorizadas.

Hasta tanto éste trámite interno de las EPS no sea regulado de manera

definitiva, se ordena al Ministerio de la Protección Social y a la Comisión de Regulación en Salud –y mientras este es creado al Consejo Nacional de Seguridad Social en Salud– que adopten las medidas necesarias para garantizar que, en el plazo indicado en la parte resolutive, se ordene a las entidades promotoras de salud, EPS, extender las reglas vigentes para someter a consideración del Comité Técnico Científico de la entidad la aprobación de un medicamento no incluido en el POS, a las solicitudes de aprobación de los servicios de salud no incluidos en el plan obligatorio de salud, distintos a medicamentos, tales como actividades, procedimientos e intervenciones explícitamente excluidas del Plan Obligatorio de Salud, cuando éstos sean ordenados por el médico tratante, teniendo en cuenta los parámetros fijados por la Corte Constitucional.

En estos casos se aplicará la regla establecida recientemente en la sentencia C-463 de 2008 en la que se revisó la constitucionalidad del literal *j* del artículo 14 de la Ley 1122 de 2007, en la cual se decidió que *“siempre que una EPS sea obligada mediante acción de tutela a suministrar medicamentos y demás servicios médicos o prestaciones de salud prescritos por el médico tratante, no incluidos en el plan de beneficios de cualquiera de los regímenes legalmente vigentes”* se reembolsará sólo la mitad de los costos no cubiertos. Es decir, cuando el Comité Técnico Científico niegue un servicio médico de acuerdo con la competencia de que trata la presente orden, y posteriormente la EPS se obligue a su prestación mediante una acción de tutela, sólo procederá el reembolso de la mitad de los costos no cubiertos.

El Ministerio de la Protección Social deberá presentar un informe sobre el cumplimiento de esta orden a la Superintendencia Nacional de Salud y a la Defensoría del Pueblo, con copia a la Corte Constitucional.

6.1.3.2.2. Ahora bien, para la Sala es importante advertir que los funcionarios públicos que han de adelantar actuaciones administrativas como consecuencia de órdenes de tutela, lo hacen con base en una sentencia judicial que constituye un título suficiente para ello tanto en el régimen contributivo como en el subsidiado. En efecto, esta providencia, así como las demás sentencias de esta Corte encaminadas a proteger el derecho a la salud, constituye un título suficiente para que se ordenen los gastos, se autoricen los servicios, o en general se realicen las conductas y se tomen las decisiones para cumplir lo ordenado en la correspondiente providencia de tutela. Así, esta sentencia constituye un pleno fundamento en caso de que en ella se ordene a funcionarios públicos la autorización de desembolsos por servicios fuera de los planes obligatorios de salud, o la adopción de decisiones que no estén expresa o literalmente descritas en el respectivo manual de funciones. Lo mismo se aplica a los particulares que ejerzan funciones públicas y deban dar cumplimiento a una orden de tutela. Ahora bien, sin necesidad de órdenes de tutela, los CTC pueden autorizar servicios no incluidos en el POS. En este evento, estarán dando cumplimiento a la sentencia C-463 de 2008 y a la presente tutela o aplicar lo dispuesto en esta sentencia. En la parte resolutive de esta sentencia, se ordenará la comunicación de ello a la Procuraduría

General de la Nación y a la Contraloría General de la República.

6.1.3.2.3 Cabe reiterar que como el derecho a la salud no es ilimitado, el Comité Técnico Científico no está obligado a autorizar de manera automática cada solicitud del médico tratante. De tal forma que si la solicitud alude a un tratamiento estético, a un asunto dental, o a otro de aquellos que la Corte ha admitido que están razonablemente excluidos del POS (*ver sección 3.5.*), el correspondiente Comité Técnico Científico podrá invocar la jurisprudencia constitucional para negar la solicitud y el juez de tutela habrá de hacer lo propio respetando los precedentes constitucionales.

#### **6.1.4. Medidas para evitar que se rechace o se demore la prestación de los servicios médicos que sí se encuentran incluidos en el POS.**

##### *6.1.4.1. Análisis del problema y de la situación actual.*

6.1.4.1.1. De acuerdo con un estudio elaborado por la Defensoría del Pueblo sobre las *La tutela y el derecho a la salud período 2003-2005* se constató que la mayoría de acciones de tutela se habían interpuesto para reclamar el acceso a servicios de salud que sí se encontraban contemplados dentro del plan obligatorio de salud. En efecto, cerca del 56.4% de las acciones de tutela presentadas en el periodo estudiado, reclamaban un servicio al cual legal y reglamentariamente los usuarios tenían derecho y que, por tanto, debía ser garantizado sin necesidad de demanda alguna.

Ahora bien, del 56.4% de solicitudes que sí estaban incluidas en el POS, el 93,4% de los casos no se encontraba sujeto a que se cumplieran semanas mínimas de cotización. Es decir, no existían razones de orden económico para que la prestación del servicio no se autorizara.

Por qué razón las entidades que saben y conocen claramente sus obligaciones se empeñan en no cumplir es un fenómeno que encuentra explicación en varias razones. Una de ellas, es que las entidades que recobran al Fosyga consideren que esta vía es más expedita o más segura para obtener el recobro.

Una buena parte de estas tutelas también se presenta porque, si bien la entidad promotora de salud no niega el suministro del servicio de salud, demora su entrega de manera tal que termina por obligar a los usuarios a asumir una carga desproporcionada que afecta su bienestar. Tanto la negación como la demora en el suministro de los contenidos del POS han sido considerados por la Corte Constitucional como vulneraciones del derecho a la salud.

Así por ejemplo, entre muchas otras, en la sentencia T-434 de 2006 la Corte estudió el caso de un enfermo de sida que requería el examen de carga viral, entre otros exámenes, y medicamentos ordenados por su médico tratante. Ambos eran negados por su EPS bajo el argumento de que no se encontraban incluidos en el POS y el accionante estaba obligado a acudir a la red pública. La Corte reiteró su jurisprudencia sobre la violación del derecho a la salud

ante la negativa a suministrar un servicio claramente incluido en el POS o en el POS-S. Sostuvo que “[r]especto de los exámenes y medicamentos solicitados es preciso introducir ciertas precisiones con el propósito de determinar el alcance de las obligaciones de la entidad prestadora. En efecto, el actor afirma que la entidad se ha negado a practicar los exámenes de carga viral, CD3, CD4 y CD8. Al respecto cabe precisar que dichos exámenes están incluidos en el Plan Obligatorio de Salud de conformidad con el artículo 74 de la Resolución 5261 de 1994 y el Acuerdo 254 de 2003, y que por lo tanto la negativa de la entidad prestadora constituye una violación del derecho fundamental a la salud del Sr. López Beleño. En efecto, como antes se consigno una vez se ha definido legal y reglamentariamente el alcance del derecho a la salud mediante la inclusión de una prestación específica en el Manual de Medicamentos o en el Manual de Actividades, Procedimientos e Intervenciones del POS o del POS-S, las entidades prestadoras de salud están obligadas a suministrarlos a sus afiliados, por tal razón en el caso concreto CAFESALUD EPS tiene la obligación de practicar los exámenes en cuestión sin que sea posible repetir contra el Fondo de Solidaridad y Garantía por el valor de estas prestaciones. En tal sentido se modificará el fallo de primera instancia.”

Así mismo, en relación con la demora en el suministro de un servicio de salud, en la sentencia T-826 de 2007, entre muchas otras, la Corte reiteró su jurisprudencia al estudiar el caso de una mujer de 21 años con una enfermedad renal severa a quien la EPS, si bien no le negaba el suministro de ningún servicio médico, le demoraba su entrega y sometía a la accionante al agotamiento de múltiples trámites. En esa oportunidad la Corte dijo que “(...) se vulneran los derechos a la integridad física y la salud de una persona cuando se demora la práctica de un tratamiento o examen diagnóstico ordenado por el médico tratante. La justificación de esta regla fue expresada, entre otras, en la sentencia T- 881 de 2003 (MP Rodrigo Escobar Gil), en la que se indicó que:“(...) el hecho de diferir, casi al punto de negar los tratamientos recomendados por médicos adscritos a la misma entidad, coloca en condiciones de riesgo la integridad física y la salud de los pacientes, quienes deben someterse a esperas indefinidas que culminan por distorsionar y diluir el objetivo mismo del tratamiento originalmente indicado. El sentido y el criterio de oportunidad en la iniciación y desarrollo de un tratamiento médico, también ha sido fijado por la jurisprudencia como requisito para garantizar por igual el derecho a la salud y la vida de los pacientes”.”

Si bien en diferentes oportunidades, tanto en caso de negación como de retraso en el suministro de los contenidos del POS, la Corte ha adoptado medidas, éstas han estado dirigidas a resolver los casos concretos. Es claro que el problema persiste y ha venido aumentando ya que cada día más ciudadanos deben acudir a la tutela para acceder a servicios de salud a los que en muchos casos tienen derecho, tal y como lo indica la Defensoría del Pueblo en el informe antes mencionado, “[e]n el año 2005 se interpuso un total de 224.270 tutelas, un 13% más que en el 2004 y un 160% más que en 1999.”

6.1.4.1.2. En conclusión, el Estado deja de proteger el derecho a la salud cuando permite que la mayoría de violaciones sean claros *irrespetos* a dicho derecho, en los que se obstaculiza a las personas el acceso a servicios contemplados en los planes obligatorios de salud, ya financiados. Mantener los incentivos y desincentivos que no promueven el goce efectivo del derecho, así como no ejercer adecuadamente las facultades de vigilancia y control, han permitido que se mantenga esta situación constante de vulneración reiterada y en modo alguno justificable, del derecho a la salud de las personas, por parte de muchas de las entidades encargadas de garantizar la prestación de los servicios.

#### 6.1.4.2. *Ordenes específicas a impartir.*

6.1.4.2.1. Por las anteriores razones, en la parte resolutive de esta providencia se ordenará al Ministerio de la Protección Social que adopte medidas para garantizar que todas las Entidades Promotoras de Salud habilitadas en el país envíen a la Comisión de Regulación en Salud, a la Superintendencia Nacional de Salud y a la Defensoría del Pueblo, un informe trimestral en el que se indique: (i) los servicios médicos ordenados por el médico tratante a sus usuarios que sean negados por la Entidad Promotora de Salud y que no sean tramitados por el Comité Técnico Científico, (ii) los servicios médicos ordenados por el médico tratante a sus usuarios que sean negados por el Comité Técnico Científico de cada entidad; (iii) indicando en cada caso las razones de la negativa, y, en el primero, indicando además las razones por las cuáles no fue tramitado por el Comité Técnico Científico.

El primer informe deberá ser enviado en la fecha indicada en la parte resolutive de esta providencia. Copia del mismo deberá ser remitida a la Corte Constitucional antes de la misma fecha.

6.1.4.2.2. Así mismo, se ordenará al Ministerio de la Protección Social y a la Superintendencia Nacional de Salud que adopten las medidas para identificar las Entidades Promotoras de Salud y las Instituciones Prestadoras de Servicios que con mayor frecuencia se niegan a autorizar oportunamente servicios de salud incluidos en el POS o que se *requieran con necesidad*. Con este fin, el Ministerio y la Superintendencia deberán informar a la Defensoría del Pueblo, a la Procuraduría General de la Nación y a la Corte Constitucional (i) cuáles son las Entidades Promotoras de Salud y las Instituciones Prestadoras de Servicios que con mayor frecuencia incurren en prácticas violatorias del derecho a la salud de las personas; (ii) cuáles son las medidas concretas y específicas con relación a éstas entidades que se adoptaron en el pasado y las que se adelantan actualmente, en caso de haberlas adoptado; y (iii) cuáles son las medidas concretas y específicas que se han tomado para garantizar el goce efectivo del derecho a la salud, de las personas que se encuentran afiliadas a las Entidades Promotoras de Salud y las Instituciones Prestadoras de Servicios identificadas.

El informe a cargo de la Superintendencia y el Ministerio deberá ser

presentado antes de la fecha indicada en la parte resolutive de esta providencia.

## **6.2 Ordenes relacionadas con el derecho al recobro de servicios médicos no cubiertos por el plan de beneficios ante el Fosyga o las entidades territoriales.**

La garantía del derecho a la salud obedece a la actuación organizada, planeada y eficaz de los diferentes actores, públicos y privados, de los cuales depende el respeto, la protección y el cumplimiento de las obligaciones derivadas de este derecho. En tal sentido, el incumplimiento de los mismos suele tener impacto en el Sistema y no sólo en un caso particular.

Cuando la Constitución Política protege de especial manera los recursos de la salud, ordenando que estos son de destinación específica (artículo 48 de la Constitución), no sólo evita que los recursos se destinen a otras finalidades, sino que establece una garantía positiva de que los recursos efectivamente se utilizarán en la prestación de los servicios que se requieran para asegurar el goce efectivo del derecho a la salud.

Ello supone tanto la existencia de los recursos de salud, como la posibilidad real de destinar dichos recursos, oportunamente, a costear efectivamente el valor de los servicios prestados. Por ejemplo, en la sentencia C-289 de 2008 la Corte consideró que las medidas dirigidas a promover la contratación con las ARP públicas eran constitucionales por buscar garantizar el flujo de recursos en estas instituciones, lo cual contribuía a la prestación de los servicios de salud. Indicó que “(...) *promover la contratación con las ARP públicas y la ARP del ISS busca garantizar el flujo de recursos en estas instituciones con el fin de mejorar la prestación de los servicios de seguridad social, lo cual satisface los principios de solidaridad y universalidad (artículo 48 de la Constitución). En la misma línea, el artículo 1 de la Ley 1122 de 2007 señala como finalidad de las modificaciones al sistema de seguridad social dirigida a mejorar la prestación de los servicios a los usuarios. || Finalmente, la medida (...) es proporcional según los parámetros definidos por la Corte Constitucional ya que efectivamente protege los derechos de los usuarios, al promover la contratación de las ARP públicas y la ARP del ISS con la finalidad de mejorar el flujo de recursos en estas entidades, sin afectar excesivamente la libertad económica de las ARP privadas*”.

La posibilidad de que las instituciones prestadoras de servicios (IPS) garanticen efectivamente la prestación de los servicios de salud requeridos por la personas, depende de la disponibilidad real de los recursos económicos que permitan a las entidades asumir los costos de los insumos necesarios para prestar los servicios y para mejorar su oferta en términos de tecnología y recursos humanos.

La Corte Constitucional reconoce que el flujo de recursos de las EPS a las IPS ha presentado problemas relacionados con la mora en el pago de los servicios

prestados por estas últimas. Así también lo reconoció el legislador que en la reforma a la Ley 100 de 1993 efectuada mediante la Ley 1122 de 2007, adoptó medidas para garantizar el flujo oportuno de recursos a la IPS, así:

- Se definieron intereses obligatorios para la mora en el pago de los servicios que prestan las IPS a los entes territoriales, las EPS y las ARS (artículo 13, parágrafo 5).
- Se definieron sistemas de pago por los servicios prestados a las IPS dependiendo de la modalidad de contratación: mes anticipado en un 100% si los contratos son por capitación, si se usa otra modalidad, como pago por evento, global prospectivo o grupo diagnóstico se ordenó efectuar como mínimo un pago anticipado del 50% del valor de la factura, dentro de los cinco días posteriores a su presentación (artículo 13, literal d).
- Se limitó la contratación de las EPS con su propia red al 30% (artículo 15)
- Se facultó al Ministerio de Protección Social para que definiera un sistema obligatorio de garantía de la calidad relacionado con el sistema tarifario (artículo 25 (a))
- Se facultó a la Superintendencia Nacional de Salud para velar porque la prestación de los servicios de salud se realice sin ningún tipo de presiones o condicionamientos frente a las IPS y para vigilar que estas adopten y apliquen un Código de conducta y de buen gobierno que oriente la prestación de los servicios a su cargo (artículo 39 (e) y (h))

La adopción de este tipo de medidas orientadas a garantizar el flujo de recursos de las EPS a las IPS, también ha sido avalado por la Corte Constitucional. Además de la sentencia C-286 de 2008 citada antes, en la sentencia C-260 de 2008 la Corte consideró que este tipo de medidas, específicamente la limitación de la libertad de contratación de las EPS y las IPS en relación con las formas de pago por la prestación de servicios de salud, eran constitucionales. Manifestó que esta norma, *“en la medida en que garantiza el flujo de recursos hacia las Instituciones Prestadoras de Servicios, promueve el mejoramiento de la prestación de los servicios de salud lo cual redundará en la protección de los usuarios y en la posibilidad de brindar atención adecuada a las personas por lo cual desarrolla varios principios específicos del ámbito de la salud, como la solidaridad y la eficiencia, al permitir una mejor utilización de los recursos financieros disponibles y el beneficio de los usuarios del sistema”*

La disponibilidad de los recursos necesarios para asegurar la prestación de los servicios de salud supone la obligación de que tales recursos existan, no se asignen a fines distintos al de asegurar el goce efectivo del derecho a la salud y se destinen a la prestación cumplida y oportuna de los servicios requeridos

por las personas. Esta última obligación implica pues, garantizar el adecuado flujo de los recursos, lo cual es necesario para asegurar que toda persona goce efectivamente *del más alto nivel posible de salud*, dadas las condiciones presupuestales, administrativas y estructurales existentes. El flujo de recursos es importante tanto hacia los prestadores de servicios de salud (IPS) como hacia los aseguradores (EPS). Actualmente, como se vio, se han adelantado algunos esfuerzos para asegurar el flujo oportuno de recursos hacia las IPS, por lo que la Corte no adoptará en la presente sentencia medidas en este aspecto. Sin embargo, en cuanto al flujo de recursos hacia las EPS actualmente no se han adoptado medidas que garanticen su oportunidad, por ejemplo mediante la garantía del reembolso oportuno de los recursos que estas entidades deben invertir en atender a sus usuarios al autorizar servicios no incluidos en el Plan de Beneficios, pero autorizados por el CTC u ordenados en fallos de tutela.

Dadas las reglas del actual Sistema de Salud, las entidades promotoras de salud, EPS, tienen un derecho constitucional al recobro, por concepto de los costos que no estén financiados mediante las unidades de pago por capitación (UPC). Para garantizar el derecho a la salud de los usuarios, el cual depende del flujo oportuno de recursos en el sistema, el procedimiento de recobro debe ser claro, preciso, ágil.

Actualmente, el procedimiento de recobro ante el FOSYGA por concepto de medicamentos autorizados por el Comité Técnico Científico (CTC) y servicios médicos ordenados por fallos de tutela se encuentra establecido en la Resolución 2933 de 2006. Si bien con anterioridad a la expedición de esta Resolución ya existía regulación sobre recobros.

Entre los requisitos que se exigen para efectuar los recobros hay un primer grupo de documentos generales, los cuales deben aportarse una sola vez hasta que se presenten cambios en los mismos relacionados con aspectos como la existencia y representación de las entidades o el listado de precios de los proveedores. Adicionalmente, se deben presentar documentos relacionados con el caso concreto por el que se solicita el recobro, los cuales difieren si los servicios médicos suministrados fueron ordenados por el Comité Técnico Científico o por un fallo de tutela.

Cuando el recobro obedece a una decisión de tutela, la solicitud de recobro debe ir acompañada de: la primera copia del fallo de tutela con constancia de ejecutoria, factura de venta del proveedor, certificado de semanas cotizadas cuando la tutela sea por incumplimiento de períodos mínimos de cotización, copia del acta del CTC que negó el servicio, si fuera el caso y un documento que evidencie la prestación del servicio de salud al paciente.

Por su parte, cuando el recobro se origina en una autorización del Comité Técnico Científico, la solicitud de recobro debe incluir: copia del acta del comité técnico científico, copia de la factura de venta, copia de la fórmula médica, y un documento que evidencie la prestación del servicio de salud al

paciente.

Como se aprecia, en ambas hipótesis el recobro está supeditado a la prestación del servicio de salud. Esto es razonable, aunque en ocasiones conduce a que el servicio de salud se demore mientras la EPS obtiene todos los documentos necesarios para solicitar el recobro, lo cual no debe suceder.

El término para presentar las solicitudes de recobro ante el FOSYGA es de seis meses, el cual se cuenta de diferente manera dependiendo del origen de la orden. Al respecto, la regulación señala: *“Para efectos de las reclamaciones por concepto de medicamentos no incluidos en el POS y autorizados por el Comité Técnico-Científico, se tendrá en cuenta la fecha de radicación de la factura ante la EPS, EOC y ARS por parte del proveedor o la fecha del suministro efectivo del medicamento; y para el caso de recobros por concepto de medicamentos y de la prestación de servicios no incluidos en los planes obligatorios de salud, ordenados por fallos de tutela, se tendrá en cuenta la fecha de expedición de la constancia de ejecutoria de la sentencia que la soporta o la fecha de radicación de la factura ante la respectiva EPS, ARS o EOC por parte del proveedor”*. Presentada la solicitud de recobro, la entidad que actúe como administradora del Fondo cuenta con dos meses para informar a la entidad reclamante el resultado. En los casos en los que el resultado sea la aprobación para el pago, éste deberá realizarse dentro del plazo señalado en el artículo, es decir, dos meses.

La jurisprudencia de la Corte Constitucional ha adoptado diferentes aproximaciones para ordenar el recobro al Fosyga en cuanto a los plazos. La sentencia SU-480 de 1997 fue la primera sentencia de unificación en la cual se estableció la posibilidad de que las Entidades Prestadoras de Salud recobraran específicamente ante el FOSYGA por los servicios prestados cuyo costo no estuvieran legal ni reglamentariamente obligados a asumir. El problema jurídico planteado en esa ocasión era si *“(…) se pueden recetar o no medicamentos que no figuran en el listado oficial y, en el evento de hacerse, si las EPS pueden posteriormente repetir contra el Estado”*. Después de reiterar la jurisprudencia acerca de la obligación de las EPS de prestar servicios no incluidos en el POS cuando estuviera en riesgo la vida o la salud del paciente, la Corte afirmó que *“(…) como se trata de una relación contractual, la E.P.S. sólo tiene obligación de lo especificado, el Estado le delegó dentro de reglas puntuales, luego, si se va más allá de lo reglado, es justo que el medicamento dado para salvar la vida sea sufragado, mediante repetición, por el Estado. (…) Pero de donde saldrá el dinero? Ya se dijo que hay un Fondo de Solidaridad y garantía, inspirado previamente en el principio constitucional el de la SOLIDARIDAD, luego a él habrá que acudir.”*

Durante varios años las diferentes Salas de Revisión de la Corte Constitucional adoptaron una regla clara para aquellos casos en los cuales una EPS prestara un servicio médico (medicamento, examen diagnóstico o tratamiento) cuyos costos no le correspondiera asumir (por estar excluido del POS, o por incumplimiento de período mínimo de cotización), según la cual *“(…) además de reconocer el derecho que le asiste a la entidad, la*

*jurisprudencia ha exigido que el administrador del FOSYGA, a los 15 días de presentada la solicitud de pago por parte de la entidad respectiva, pague lo adeudado o indique cuándo lo hará; indicando que, en todo caso, el pago debe hacerse antes de transcurridos 6 meses, contados a partir del momento en que se presente la solicitud*". Estos plazos fueron usados de manera casi generalizada por las diferentes salas.

Actualmente, salvo la Sala Segunda de Revisión que fija plazos y la Sala Sexta que no reconoce el derecho al recobro, las diferentes Salas reconocen la facultad de las EPS de repetir contra el FOSYGA sin especificar plazos pero ordenando el cumplimiento de lo establecido en la regulación.

Inicialmente, cuando la jurisprudencia profirió las primeras órdenes de recobro al FOSYGA no existían términos para el recobro y esto dificultaba a las EPS recuperar el costo de los servicios que prestaba a sus usuarios y que legalmente no le correspondía asumir. Actualmente existen términos claros dentro de los cuales el administrador del FOSYGA está obligado a efectuar el reembolso a las entidades. Sin embargo, como se verá mas adelante, el retraso en el cumplimiento de los términos de recobro es justamente uno de los aspectos que ha afectado sistemáticamente desde hace varios años el flujo de recursos en el sistema en desmedro del acceso efectivo de los usuarios a los servicios de salud y del goce efectivo del derecho a la salud.

Ahora bien, la regla general acerca del monto que se reconoce, y se paga, por el recobro de servicios de salud (medicamentos, actividades, procedimientos, intervenciones o elementos) prestados por las entidades a los usuarios, en cumplimiento de fallos de tutela o autorizaciones del Comité Técnico Científico, parte de aquello que la entidad no está obligada a asumir legal y reglamentariamente. Así, factores como el número de semanas cotizadas certificadas por la entidad, o la existencia de un medicamento del mismo grupo terapéutico que remplace o sustituya el medicamento ordenado, afectan la suma que se reembolsa.

Dos nuevas reglas incluidas en la Resolución 2933 de 2006, merecen ser resaltadas ya que desestiman la utilización de la tutela para permitir el acceso a los servicios de salud de sus usuarios. Por una parte, el artículo 25 que regula el *Monto a reconocer y pagar por recobro de medicamentos*, indica que la única situación en la que se reconoce el valor de medicamentos POS ordenados por fallos de tutela para afiliados del régimen contributivo es el incumplimiento de los períodos mínimos de cotización. Textualmente señala: *"No habrá lugar al pago de medicamentos POS para actividades, procedimientos e intervenciones de los planes obligatorios de salud, por aspectos diferentes al contemplado en el presente literal, por encontrarse ya reconocidos por el Sistema General de Seguridad Social en Salud, a través de la respectiva Unidad de Pago por Capitación (UPC)"*. Esta norma excluye el pago de medicamentos cubiertos por el POS aún cuando hayan sido ordenados mediante acción de tutela.

Esta misma regla se encuentra prevista en el artículo 26, literal *a*, en relación con el pago de recobros por actividades, procedimientos, intervenciones o elementos incluidos en el Plan de Beneficios del Régimen Contributivo, para afiliados que no han cumplido con los períodos mínimos de cotización.

Por otra parte, en el artículo 25, literal *c*, que se refiere al recobro de medicamentos no POS ordenados por fallos de tutela para actividades, procedimientos e intervenciones excluidas de los Planes Obligatorios de Salud, se establece el reconocimiento sólo del 50% del valor facturado del medicamento cuando este es ordenado por tutela. Señala la norma: *“El valor a reconocer y pagar por concepto de medicamentos ordenados por fallos de tutela para actividades, procedimientos e intervenciones excluidas de los planes obligatorios de salud, será el 50% del valor facturado del medicamento”*. La relevancia de la norma consiste en que los medicamentos para actividades, procedimientos e intervenciones excluidas de los planes obligatorios de salud son los mismos que puede autorizar el CTC. Por lo tanto, cuando es esta entidad la que autoriza los medicamentos, el recobro no tiene descuentos (literal *a*, artículo 25), mientras que cuando el suministro del medicamento es ordenado mediante una acción de tutela, habiendo podido ser autorizado por el CTC, se descuenta el 50% del valor facturado del medicamento.

Por último, es importante señalar que si bien la regla general en la jurisprudencia constitucional es que cuando se ordena a una EPS la prestación de un servicio médico no incluido en el POS, se ordena a su vez el reconocimiento del derecho al recobro por el monto que legal y reglamentariamente no le corresponda asumir respecto del mismo, muchas veces se ordena la prestación del servicio médico para proteger el derecho a la salud del usuario, pero no se ordena el recobro ante el FOSYGA. Así sucede, por ejemplo, cuando se determina que el servicio médico sí estaba incluido en el POS y cuando existe otro obligado a asumir el costo del servicio por tener capacidad económica suficiente. Los recursos del FOSYGA sólo pueden ser utilizados para pagar servicios médicos prestados por las EPS en aquellos casos en los cuales no existe ningún otro obligado asumir el costo.

Esta situación se presenta cuando el juez de tutela determina que el servicio médico que fue negado por la EPS aduciendo que estaba excluido del POS, sí estaba incluido en éste. Así, por ejemplo, en la sentencia T-859 de 2003 se estudiaron los casos de dos personas que presentaban problemas de estabilidad en las rodillas y a quienes sus médicos tratantes les habían ordenado un procedimiento de aloinjerto. Las EPS negaron la autorización del procedimiento alegando que no se encontraba incluido en el “Manual de Actividades, Intervenciones y Procedimientos del Plan Obligatorio de Salud en el Sistema General de Seguridad Social en Salud”, en el artículo 12 que regula el suministro de prótesis y ortesis. Contrario al dicho de las EPS, la Corte pudo determinar que el aloinjerto sí se encontraba incluido en el POS y, por lo tanto, ordenó la prestación del servicio sin que ordenara a su vez el recobro, y precisando: *“(…) de haberse realizado la intervención por parte de*

*terceras personas, se habrá presentado un enriquecimiento no justificado por parte de las E.P.S. demandadas, lo cual demanda su compensación. Si la intervención o el injerto fue costado por particulares, éstos tendrán a su disposición los procedimientos ordinarios de reclamación. || Por su parte, si dicho costo fue cubierto con recursos afectados a la salud y por parte de una entidad pública, como la Secretaría de Salud de Bucaramanga, los demandados deberán iniciar conversaciones con tales entidades para definir el modo de compensación. Lo anterior se torna necesario ante el hecho de que se trata de recursos con destinación específica y cuya mengua implica una afectación del disfrute del derecho fundamental de la salud de otros colombianos.”*

Una decisión similar se tomó en la sentencia T-1278 de 2005 en la cual se estudiaron los casos de dos personas que presentaban hipoacusia y a quienes sus médicos tratantes les habían ordenado la adaptación de audífonos, los cuales fueron negados por la misma EPS con el argumento que se encontraban excluidos del POS. La Corte pudo determinar que los audífonos sí estaban incluidos y en consecuencia omitió ordenar el recobro ante el FOSYGA que había sido solicitado por los demandantes y los demandados.

Tampoco se ordena recobro ante el FOSYGA por los servicios prestados cuando la Corte determina que existe alguien obligado a asumir el costo del servicio y tiene capacidad económica para pagarlo. Por ejemplo en la sentencia T-959 de 2004 se estudió el caso de una niña de tres años que padecía *diabetes mellitus tipo 1 insulino dependiente*, y que requería para mantenerse con vida ser inyectada con insulina diariamente y que se le midieran varias veces al día los niveles de azúcar en la sangre, para lo que requería jeringas y tirillas de medición de glucosa en la sangre. La Corte consideró que, dados los ingresos y egresos de los padres, era con cargo a ellos y no al FOSYGA que se debían prestar los servicios a la menor puesto que tenía capacidad económica suficiente.

En la sentencia señalada se advirtió que los recursos del FOSYGA están reservados sólo para aquellas personas que no pueden de ninguna manera acceder a un servicio médico excluido del POS, en dicha ocasión la Corte señaló que “[l]os jueces de tutela y los accionantes no deben olvidar que los recursos del Fosyga, están destinados exclusivamente para las personas que les es imposible, por sus propios medios económicos, acceder a tratamientos, medicamentos o pruebas de diagnóstico excluidos del P.O.S, que requieran con urgencia para salvaguardar su vida y su integridad.”

Finalmente, cuando las solicitudes de recobro no son aprobadas, pueden ser rechazadas, devueltas o aprobadas condicionadamente, caso en el cual se cancela el 50% del valor solicitado y el resto se condiciona a la entrega completa de la documentación requerida. En estos casos la no autorización del recobro se justifica en la entrega incompleta o inconsistente de la información requerida, según la Resolución, para el auditaje.

A continuación se especifican algunos de los problemas del sistema de recobros que han sido identificados y que deben ser resueltos con miras a garantizar el adecuado flujo de recursos en el sistema, condición necesaria para asegurar el goce efectivo del derecho a la salud de las personas y para evitar que las personas se encuentren con barreras de acceso a los servicios que solo pueden superar mediante la interposición de una acción de tutela.

Se advierte que los reembolsos al Fosyga únicamente operan frente a los servicios médicos ordenados por jueces de tutela o autorizados por el CTC en el régimen contributivo. En estos mismos casos, cuando el usuario pertenece al régimen subsidiado, la Ley 715 de 2001 prevé que los entes territoriales asuman su costo por tratarse de servicios médicos *no cubiertos con los subsidios a la demanda*.

Indica el artículo 43 de esa norma: *“Sin perjuicio de las competencias establecidas en otras disposiciones legales, corresponde a los departamentos, dirigir, coordinar y vigilar el sector salud y el Sistema General de Seguridad Social en Salud en el territorio de su jurisdicción, atendiendo las disposiciones nacionales sobre la materia. Para tal efecto, se le asignan las siguientes funciones: (...) 43.2.1. Gestionar la prestación de los servicios de salud, de manera oportuna, eficiente y con calidad a la población pobre en lo no cubierto con subsidios a la demanda, que resida en su jurisdicción, mediante instituciones prestadoras de servicios de salud públicas o privadas. || 43.2.2. Financiar con los recursos propios, si lo considera pertinente, con los recursos asignados por concepto de participaciones y demás recursos cedidos, la prestación de servicios de salud a la población pobre en lo no cubierto con subsidios a la demanda y los servicios de salud mental”*.

## **6.2.1. Orden para agilizar la ejecución de las sentencias de tutela.**

### *6.2.1.1. Análisis del problema y de la situación actual.*

6.2.1.1.1. Dentro del presente proceso dos de las acciones de tutela presentadas se encuentran dirigidas a obtener mejores condiciones para el recobro ante el Fosyga originados en órdenes de tutela. En el proceso T-1645295 se solicita al Consejo Superior de la Judicatura que adopte medidas para evitar la interpretación de muchos jueces de instancia en el sentido de que la ejecutoria del fallo de tutela sólo se da cuando la Corte Constitucional decide si va o no a revisar el caso, lo cual retrasa el reembolso de las sumas gastadas por las EPS ya que estas deben prestar los servicios médicos en el momento en que son ordenados y la constancia de ejecutoria es uno de los requisitos para presentar la solicitud de recobro. Así mismo, en el proceso T-1646086 el solicitante requirió al Ministerio de Protección Social para que adoptara medidas para simplificar el procedimiento de recobro por parte de las EPS ante el Fosyga, entre otros, eliminando el requisito de la ejecutoria del fallo de tutela, teniendo en cuenta las amplias diferencias de criterio entre los

jueces que en muchos casos lleva a que estos esperen hasta que la Corte Constitucional excluya la tutela de revisión para emitir la constancia de ejecutoria.

6.2.1.1.2. Independientemente de la decisión que se adoptará en estos dos casos en la presente sentencia (*ver sección 5.8.*), las solicitudes son reveladoras de la manera en que la regulación de los recobros ante el Fosyga no imprime suficiente celeridad a los procedimientos al exigir requisitos como el señalado y al existir divergencias interpretativas sobre su cumplimiento.

Como se indicó antes, la Resolución 2933 de 2006 exige entre los requisitos para presentar solicitudes de recobro originados en fallos de tutela “*copia del fallo de tutela con constancia de ejecutoria.*” (artículo 11, literal *b*). Además la copia debe ser auténtica. El incumplimiento de este requisito genera las consecuencias previstas en la misma norma: cuando no se adjunta copia auténtica del fallo la solicitud es rechazada (artículo 15, literal *f*); cuando la copia auténtica del fallo tiene enmendaduras la solicitud es devuelta (artículo 16, numeral *iii*); cuando la copia auténtica del fallo no contiene la constancia de ejecutoria la solicitud es aprobada condicionalmente (artículo 17, literal *j*). Lo mismo sucede cuando la copia auténtica del fallo es ilegible en su parte resolutive (artículo 17, literal *k*). En estos casos, se autoriza el pago del 50% del valor de la solicitud hasta que se completen los requisitos. En la misma resolución, en relación con el contenido del fallo de tutela, también se establece como causal de rechazo que el fallo de tutela no otorgue la posibilidad de recobro ante el Fosyga, la Nación o el Ministerio de Protección Social (artículo 15, literal *b*), así sea claro que el servicio de salud autorizado no está cubierto por el plan de beneficios.

La exigencia de la presentación de la constancia de ejecutoria del fallo de tutela se convierte en un obstáculo para obtener el recobro cuando este es interpretado en el sentido de que sólo se entiende ejecutoriado un fallo de tutela cuando la Corte Constitucional lo ha excluido de revisión, esto, en razón de que la remisión a la Corte Constitucional, su exclusión de revisión y la devolución al respectivo despacho del juez de instancia, es un procedimiento que puede tardar varios meses. Esta interpretación choca con el inmediato cumplimiento de las órdenes de tutela y se ha convertido en una traba que impide el flujo oportuno de recursos para financiar el acceso efectivo de los usuarios de los servicios de salud.

6.2.1.1.3. El artículo 86 de la Constitución que consagra la acción de tutela señala: “*El fallo, que será de inmediato cumplimiento, podrá impugnarse ante el juez competente y, en todo caso, éste lo remitirá a la Corte Constitucional para su eventual revisión.*” Según la norma constitucional, las decisiones de tutela deben ser cumplidas de manera inmediata, independientemente de su remisión a la Corte Constitucional para efectos de su eventual revisión. Por eso las EPS deben prestar los servicios ordenados por el juez sin esperar a que la Corte Constitucional seleccione o excluya el fallo de revisión. Ahora bien, el derecho al reembolso surge de la prestación de un servicio de salud,

ordenado por el juez o autorizado por el CTC que no se encuentre en el plan de beneficios financiado en la UPC. Así, si el servicio médico ordenado es prestado inmediatamente al usuario del sistema y la EPS paga por él, es en ese momento en el que surge el derecho a recobrarlo. De lo contrario, se entorpece el flujo oportuno de recursos para financiar el acceso por parte de los usuarios en desmedro del derecho de todas las personas a gozar de manera efectiva del derecho a la salud.

En efecto, esta es la misma interpretación que sobre este punto hace el Ministerio de la Protección Social. Mediante auto de febrero 11 de 2008 se solicitó al Consejo Nacional de Seguridad Social en Salud, a la Comisión de Regulación en Salud y al consorcio administrador del Fosyga que indicaran *“a partir de qué momento se entiende, según la regulación, que una sentencia de tutela ha quedado ejecutoriada para efectos de la solicitud de recobro al Fosyga. Indicar la fuente legal o reglamentaria.”*. El Ministerio de Protección Social, a nombre del Consejo Nacional de Seguridad Social en Salud, indicó:

*“Respecto del momento de la ejecutoria, algunos jueces han venido interpretando que la sentencia solamente queda ejecutoriada cuando la Honorable Corte Constitucional la revisa o cuando profiere un auto que señala que el fallo de tutela no es objeto de revisión.*

*Esta posición podría tenerse como contraria a lo dispuesto en el artículo 32 del Decreto 2591 de 1991, cuando en el trámite de la impugnación señala en el aparte final que ‘(...) Si a su juicio, el fallo carece de fundamento, procederá a revocarlo, lo cual comunicará de inmediato. Si se encuentra ajustado el fallo a derecho, lo confirmará. En ambos casos, dentro de los diez (10) días siguientes a la ejecutoria del fallo de segunda instancia, el juez remitirá el expediente a la Corte Constitucional para su eventual revisión’.*

*Igual situación sería predicable de los fallos de tutela que no son impugnados, los cuales al vencimiento del término de tres (3) días para ser impugnados, que conforme a la regla general de ejecutoria de las providencias contenidas en el artículo 331 del Código de Procedimiento Civil, se entienden ejecutoriadas, deben remitirse para la eventual revisión de la Honorable Corte Constitucional.*

*Conforme a lo anterior, para efectos de determinar en qué momento quedan ejecutoriados los fallos de tutela, este Ministerio considera y así lo ha dispuesto en la regulación relativa a recobros de que anteriormente se hizo mención, que debe seguirse la regla general contenida en el artículo 331 del Código de Procedimiento Civil que establece que las providencias quedan ejecutoriadas y son firmes tres (3) días*

*después de ser notificadas cuando carecen de recursos, o cuando procediendo los recursos estos no se hayan interpuesto, o queda ejecutoriada la providencia que decida los recursos interpuestos.”*

6.2.1.1.4. Con base en lo anterior y teniendo en cuenta que la Corte Constitucional en reiteradas oportunidades ha indicado que *“la repetición se debe tramitar con base en el principio de celeridad”* y que el flujo de recursos en el sistema de salud se encuentra dirigido a garantizar la protección del derecho a la salud de los usuarios, como se indicó arriba, una interpretación *conforme* a la Constitución del requisito de la ejecutoria del fallo de tutela, debe dirigirse a constatar que (i) se hayan agotado todas las instancias, o bien (ii) que si no se agotaron se haya vencido el término para impugnar el fallo de primera instancia. (iii) Es contrario a la Constitución postergar el reconocimiento del derecho al recobro hasta tanto la Corte Constitucional decida sobre la selección del fallo que ya concedió el derecho del tutelante a acceder al servicio de salud. Y lo es mucho más si ello conduce a demorar la autorización y protección del servicio de salud ordenado.

6.2.1.1.5. En el mismo sentido, la exigencia de que el fallo de tutela otorgue explícitamente la posibilidad de recobro ante el Fosyga también debe ser interpretada *conforme* a la Constitución, en cuanto es el pago de un servicio médico no incluido en el plan de beneficios, lo que da lugar al surgimiento del derecho al reembolso de la suma causada por la prestación del servicio, y no la autorización de un juez o del CTC. En relación con este último aspecto, la Corte advierte que en ningún caso el Fosyga está obligado al reembolso de los costos generados por servicios médicos que hagan parte del Plan de Beneficios.

Adicionalmente, la determinación de lo que sí está incluido en el plan de beneficios también ha planteado recurrentemente la cuestión de la diferencia entre medicamentos genéricos y medicamentos de marca. Puede darse el caso de que el médico tratante prescriba un medicamento de marca, no incluido dentro del POS, mientras que la denominación común de dicho medicamento sí lo está. Ello conduce a que una glosa frecuente a las solicitudes de reembolso sea *‘Principio activo en POS’* (Resolución 2933 de 2006) lo cual impide que la diferencia de valor entre el medicamento de marca efectivamente suministrado al usuario y el medicamento genérico sea reembolsada a la EPS.

6.2.1.1.6. Recuerda la Corte que la regulación vigente sobre genéricos establece como regla general la obligación de que los medicamentos en el Sistema General de Seguridad Social en Salud, se prescriban bajo su denominación genérica, aún cuando el asegurador puede suministrarlos en cualquiera de sus formas de comercialización (genérico o de marca), siempre y cuando se conserven los criterios de calidad, seguridad, eficacia y comodidad para el paciente. Indica la norma: *“La utilización de las Denominaciones Comunes Internacionales (nombres genéricos) en la*

*prescripción de medicamentos será de carácter obligatorio. Los medicamentos a dispensar deben corresponder al principio activo, forma farmacéutica y concentración prescritos, independientemente de su forma de comercialización (genérico o de marca), siempre y cuando se conserven los criterios de calidad, seguridad, eficacia y comodidad para el paciente.” (Acuerdo 228 de 2002, artículo 4°). A su vez, define la Denominación Común Internacional como el “[n]ombre recomendado por la OMS para cada medicamento. La finalidad de la Denominación Común Internacional es conseguir una buena identificación de cada fármaco en el ámbito internacional.” y el medicamento genérico como “(...) aquel que utiliza la denominación común internacional para su prescripción y expendio.” (Acuerdo 228 de 2002, artículo 3°).*

6.2.1.1.7. La jurisprudencia de la Corte Constitucional por su parte, se ha ocupado primordialmente de lo relacionado con los criterios que deben tener en cuenta los médicos tratantes cuando, excepcionalmente, ordenan un medicamento en su denominación de marca y los criterios que debe tener en cuenta el CTC para autorizar o negar su suministro:

*(i) la determinación de la de calidad, la seguridad, la eficacia y comodidad para el paciente en relación con un medicamento corresponde al médico tratante (y eventualmente al comité técnico científico), con base en su experticio y el conocimiento clínico del paciente*

*(ii) prevalece la decisión del médico tratante de ordenar un medicamento comercial con base en los criterios señalados (experticio y el conocimiento clínico del paciente), salvo que el Comité Técnico Científico, basado en dictámenes médicos de especialistas en el campo en cuestión, y en un conocimiento completo y suficiente del caso específico bajo discusión, considere que el medicamento genérico tiene la misma eficacia.*

*(iii) una EPS, en el régimen contributivo o subsidiado, puede reemplazar un medicamento comercial a un paciente con su versión genérica siempre y cuando se conserven los criterios de (i) calidad, (ii) seguridad, (iii) eficacia y (iv) comodidad para el paciente. La decisión debe fundarse siempre en (i) la opinión científica de expertos en la respectiva especialidad y (ii) la historia clínica del paciente, esto es, los efectos que concretamente tendría el tratamiento o el medicamento en el paciente.*

6.2.1.1.8. Anteriormente, la regulación sí se ocupaba del tema al definir el monto a pagar en los casos en los que se autorizaba por el CTC o se ordenaba por un juez de tutela un medicamento con un homólogo en el Pos: “a) Medicamentos no incluidos en el Acuerdo 228 del CNSSS con homólogo. El valor a reconocer por concepto de medicamentos no incluidos en el Plan Obligatorio de Salud, POS, con homólogo en dicho Acuerdo, será el resultante de restar el valor de la cantidad del medicamento autorizado por el Comité Técnico Científico u ordenado en el fallo de tutela, según la factura de venta del proveedor, el valor de la cantidad del medicamento homólogo listado en el

Acuerdo 228 del CNSSS que en su defecto se suministraría, según el valor certificado en el listado de precios de los proveedores de la entidad.” (Resolución 3797 de 2004)

En efecto, constata la Corte que no existe una regla que resuelva cuánto debe ser reembolsado a la EPS, que autorizó el suministro del medicamento de marca, usualmente más costoso que el correspondiente genérico. Mientras el regulador llena este vacío, deben aplicarse las reglas fijadas por la jurisprudencia. Estas son, de acuerdo con la jurisprudencia descrita arriba: a) el médico tratante debe prescribir el medicamento bajo la denominación común internacional (genérico), salvo que ya hubiese comprobado que para el usuario es mejor, desde el punto de vista médico, el medicamento de marca; b) si el médico tratante prescribe un medicamento de marca, debe justificar ante el Comité Técnico Científico su necesidad médica; c) el Comité Técnico Científico debe analizar desde la perspectiva médica la solicitud y, en caso de autorizar el medicamento de marca, acompañar la solicitud de reembolso con la correspondiente justificación. Adicionalmente, d) de existir dicha justificación no se podrá glosar la solicitud alegando “principio activo en POS” y e) el monto a rembolsar deberá corresponder a lo que la EPS no está legal y reglamentariamente obligada a asumir.

6.2.1.1.9. Tanto la regulación como la jurisprudencia constitucional se orientan expresamente a favorecer la formulación de medicamentos en su denominación genérica, contemplando la posibilidad excepcional de que se formulen medicamentos en su denominación de marca, en las condiciones expuestas antes. La importancia de la formulación de medicamentos genéricos radica en que es una medida efectiva para maximizar la distribución de recursos escasos en beneficio de las prioridades de la salud de los colombianos, ya que generalmente los medicamentos en denominación de marca tienen un costo superior a los medicamentos en denominación genérica. Con todo, se debe resaltar la importancia de que se conserven condiciones de *calidad, seguridad, eficacia y comodidad* para el usuario. En ese sentido, cuando el medicamento denominado ‘*de marca*’, es el idóneo para el usuario según el médico tratante, se debe proceder conforme a lo indicado anteriormente, en lugar de negarlo por razones administrativas.

6.2.1.1.10. Por las anteriores consideraciones, en la parte resolutive de esta providencia, también se ordenará que en el reembolso se tenga en cuenta la diferencia entre medicamentos de denominación genérica y medicamentos de denominación de marca, de acuerdo con lo señalado antes.

#### *6.2.1.2. Ordenes específicas a impartir.*

En conclusión, en la presente providencia se adoptarán varias ordenes en relación con las reglas de reembolso dirigidas al Ministerio de la Protección Social y al administrador fiduciario del Fosyga con el fin de que adopten medidas para garantizar que el procedimiento de recobro por parte de las Entidades Promotoras de Salud ante el Fosyga, así como ante las entidades

territoriales, sea ágil con miras a asegurar el flujo de recursos en el sistema. Dentro de estas medidas por lo menos se tendrán en cuenta las siguientes, cuando se trate de servicios de salud cuya práctica se autorizó en cumplimiento de una acción de tutela, por iniciativa del CTC correspondiente: (i) la entidad promotora de salud podrá iniciar el proceso de recobro una vez la orden se encuentre en firme, bien sea porque la sentencia de instancia no fue impugnada, bien sea porque se trata de la sentencia de segunda instancia, sin que el procedimiento de autorización del servicio de salud o el recobro pueda ser obstaculizado con base en el pretexto del eventual proceso de revisión que se puede surtir ante la Corte Constitucional; (ii) no se podrá establecer que en la parte resolutive del fallo de tutela se autorice el recobro ante el Fosyga, o las entidades territoriales, como condición para reconocer el derecho al recobro de los costos que la entidad no estaba legal ni reglamentariamente obligada a asumir. Bastará con que en efecto se constate que la EPS no se encuentra legal ni reglamentariamente obligada a asumirlo de acuerdo con el ámbito del correspondiente plan de beneficios financiado por la UPC (iii) en el reembolso se tendrá en cuenta la diferencia entre medicamentos de denominación genérica y medicamentos de denominación de marca, sin que pueda negarse el reembolso con base en la glosa “Principio activo en POS” cuando el medicamento de marca sea formulado bajo las condiciones señaladas en esta providencia.

## **6.2.2. Orden relativa a la adopción de un plan de contingencia.**

### *6.2.2.1. Análisis del problema y de la situación actual.*

A pesar de que la regulación ha establecido claramente plazos dentro de los que debe realizarse el recobro, es claro que existen serias dificultades para que los mismos sean efectuados cumplidamente. Por eso se han acumulado muchas solicitudes de recobro sin que el Fosyga haya ejecutado los desembolsos correspondientes.

6.2.2.1.1. Parte de esta acumulación al parecer se generó a partir de la promulgación del Decreto 1281 de 2002 el cual en el artículo 13 estableció un plazo perentorio para que se presentaran las cuentas atrasadas de recobro al Fosyga. Sostiene la norma: *“La reclamación o trámite de cobro de las obligaciones generadas con cargo a los recursos del Fosyga, antes de la entrada en vigencia del presente decreto, deberán presentarse dentro de los seis meses siguientes a la entrada en vigencia de este decreto.”*

Con posterioridad a la promulgación de esta norma, el Consejo Nacional de Seguridad Social en Salud debió adicionar recursos, en parte destinados a apoyo técnico, en el marco de un plan de contingencia para superar la crisis generada por la avalancha de solicitudes de recobro presentadas. El Acuerdo 231 de 2002 señaló en los considerandos lo siguiente: *“Que el alto volumen de recobros de medicamentos y fallos de tutela radicados por las Entidades Promotoras de Salud supera la capacidad de respuesta de la Dirección General de Aseguramiento para la auditoría de las cuentas, de manera que se*

*hace necesario acometer un plan de contingencia para la revisión de las cuentas acumuladas de forma que sea posible tramitar y pagar las reclamaciones en trámite durante la presente vigencia, generando oportunidad en el flujo hacia las Empresas Promotoras de Salud y superando la mora actual.”*

Con todo, estos esfuerzos al parecer resultaron insuficientes y en el año 2004 un ciudadano presentó una acción popular contra el Ministerio de la Protección Social y el administrador fiduciario del Fosyga solicitando, entre otros, el pago de las cuentas de recobros atrasadas que ya se encontraban aprobadas y el estudio de las solicitudes presentadas que se encontraban atrasadas. El 21 de febrero de 2007 el Consejo de Estado, Sala de lo Contencioso Administrativo, Sección Tercera, con ponencia del Magistrado Enrique Gil Botero decidió proteger los derechos a la moralidad administrativa, acceso a una infraestructura de servicios que garantice la salubridad pública, el derecho a la salubridad y seguridad públicas y al servicio público de salud.

Durante el proceso de la acción popular en primera instancia, las EPS intervinieron para explicar la dimensión del atraso en el trámite de las solicitudes de recobro y en el pago de los recobros aprobados atrasados. Dijeron en su intervención:

*“Las EPS, en respuesta al requerimiento del a quo, anexaron relaciones escritas y en medio magnético sobre el estado de las reclamaciones de recobro por concepto de fallos de tutela, dentro del período comprendido entre los años 2001 a 2005.*

*Así, por ejemplo, entre otras entidades prestadoras de salud, Solsalud señaló que el Consorcio Fisalud se ha demorado entre 1 y 2 años para la notificación de las glosas, las cuales fueron objetadas y no han sido levantadas, en otra no se ha ordenado el pago aunque ya está reconocido por Fisalud (...) en consideración de la solicitante éste le debe más de tres mil millones de pesos por valor de medicamentos no Pos y sentencias de tutela (fls. 1802 a 1805 cdno. 1). (...).*

*Cruz Blanca acusó de vía crucis el trámite que se debe surtir para el recobro, así como de evidente e injustificado retraso en el proceso de revisión y pago de los recobros por parte de Fisalud, e indicó que a septiembre de 2005 el Consorcio Fisalud registra un total de 2.340 cuentas de cobro pendientes de pago a dicha EPS por valor de \$1.852'634.041, correspondientes a los años 2002, 2003 y 2004. Con respecto a los tiempo de respuesta para los años 2001, 2002, 2003 y 2004 el consorcio Fisalud se toma en promedio dos años y a veces más para pronunciarse sobre las cuentas de recobro (fls. 1834 a 1847 cdno. 1). En similares términos respondieron los requerimientos del a quo las entidades Cafesalud Medicina*

*Prepagada S.A., Saludcoop y Humanavivir (fls. 1848 a 1930, diskette a fl. 1932 y escrito fl. 1941 a 1947 cdno. 1). Por su parte, Salud Cóndor envió el informe con corte a 30 de noviembre de 2005 (fls. 1965 a 1970 y 885 a 952 cdno. 1). Así mismo CaliSalud EPS (fls. 2015 a 2018 cdno. 1), SOS Servicio Occidental de salud remitió la información en medio magnético (fl. 2055 cdno. 1).”*

Así mismo, el Ministerio de Protección Social intervino para explicar el origen del represamiento de solicitudes de recobro y del pago de solicitudes atrasadas. Sostuvo al respecto, “(...) *durante la audiencia de testimonio de quien dijo ser la Directora Técnica de la Dirección de Financiamiento del Viceministerio Técnico del Ministerio de la Protección Social y ejercer funciones de ordenación del gasto de los recursos del Fosyga, advirtió que la mayoría de glosas a las reclamaciones es por extemporaneidad en la presentación, pues la normatividad otorgó a los prestadores un plazo de seis meses para que allegaran todas las cuentas pendientes, al punto que en un solo día recibieron 100.000, por lo que hubo necesidad de contratar la labor de pago y auditaje y, más adelante informó que el consorcio glosó casi un 90% de las cuentas de reclamación que le fueron entregadas, y agregó “a partir de ahí se trabajan dos frentes, posiblemente no con la celeridad que se quisiera, que son las respuestas a esas glosas y el trámite de auditoría de las nuevas cuentas que se vienen radicando desde la suscripción del adicional 03” (fl. 1811 cdno. 1) y, que según los informes de gestión presentados por el consorcio Fisalud y por la firma auditora, lo que se concluye es que hay un rezago en el trámite por efecto de los represamientos iniciales.*” Con base en estas pruebas, el Consejo de Estado consideró lo siguiente:

*“El incumplimiento de los plazos previstos en la regulación, en forma por demás severa, según se vio en el análisis probatorio, afecta estos principios rectores del funcionamiento de la seguridad social, y no se puede permitir que se perpetúe ese estado de cosas, contrario a los derechos colectivos, sin que se adopten medidas radicales para resolver los problemas que afectan a la comunidad completa.*

*Esta decisión se adopta no obstante que el Estado ha tomado medidas para tratar de superar los problemas analizados, pero es claro que no han sido suficientes ni óptimas para resolver todas las dificultades.*

*Por las anteriores razones la Sala encuentra acreditada la violación al derecho colectivo a la moralidad administrativa.”*

En relación con otros derechos colectivos cuya vulneración había alegado el demandante, el Consejo de Estado indicó: “(...) *se amenaza y pone en peligro el acceso al servicio de salud, a la seguridad y salubridad pública, y sobre todo, a que su prestación sea eficiente y oportuna, pues no es igual que las EPS cuenten, puntualmente, con los recursos que han invertido en los*

*pacientes financiados por el FOSYGA, a que el dinero tarde hasta un año o dos en recuperarse. Este hecho estimula la ineficiencia del servicio de salud, sobre todo porque las empresas que actualmente prestan servicios públicos, han entrado en la lógica de que la eficiencia financiera y la utilidad forman parte de los principios gerenciales con los cuales opera el sistema completo.”*

En la parte resolutive de dicha providencia se ordenó adelantar los trámites atrasados en dos meses y pagar las cuentas aprobadas atrasadas en un mes:

*“SEGUNDO: Ordénase al MINISTERIO DE LA PROTECCIÓN SOCIAL y al CONSORCIO FISCALUD conformado por FIDUCOLOMBIA S.A., Fiduciaria La PREVISORA S.A. y FIDUCAFE S.A., o a quien ejerza sus funciones, que los trámites de los recobros y las cuentas de cobro se realicen en el tiempo previsto en la resolución 3797 de 2004-o las que la han adicionado, modificado o derogado-, tratándose de procedimientos administrativos que se inicien a partir de la fecha.*

*Los trámites que están en mora deben adelantarse en un plazo máximo de dos (2) meses, contados desde la ejecutoria de este fallo.*

*Los pagos que están en mora, porque cumplen con los requisitos de las resoluciones vigentes, deben efectuarse en un término máximo de un (1) mes.”*

Adicionalmente se creó un Comité de Verificación interinstitucional para el seguimiento de la sentencia. Dice al respecto,

*“QUINTO: Para hacerle seguimiento a esta decisión, créase el Comité de verificación, conformado por el Magistrado ponente del Tribunal a quo; un representante del Ministerio Público, designado por el Procurador General de la Nación; un representante de todas las EPS, y otro de todas las ARS, que funciona en el país, escogidos entre ellos; y un representante de todas las Direcciones Seccionales de Salud de cada departamento, designado entre ellos.”*

6.2.2.1.2. Dentro del presente proceso de tutela la Corte solicitó al Consorcio Fidufosyga que informara acerca del estado actual de los recobros ante esa entidad. Respecto a los recobros pendientes de pago indicó: *“Al corte del 18 de febrero de 2008, se encuentran pendientes de pago las EPSs del régimen subsidiado, 6.362 recobros aprobados y aprobados condicionados (...) los cuales fueron radicados en noviembre de 2007, de los cuales se espera ordenación del gasto y autorización del giro que emite el Ministerio de Protección Social.”*

6.2.2.1.3. En este momento no se tiene certeza acerca de la dimensión del atraso del procesamiento de solicitudes atrasadas y del pago de recobros solicitados, sin embargo en el Informe al Congreso presentado por el Consejo

Nacional de Seguridad Social en Salud, se señaló: *“En el período enero a mayo de 2007 no se presenta ejecución presupuestal de recobros de Medicamentos No POS y fallos de tutela, implicando realizar un plan de contingencia en el proceso de revisión y auditoria en el segundo trimestre de 2007. Al cierre de este informe se presenta una ejecución del 72.48% en la Subcuenta de Compensación y del 84.32% en la Subcuenta de Solidaridad.”* Lo anterior muestra que aún cuando la sentencia del Consejo de Estado proferida en febrero dio un plazo de un mes para pagar las cuentas atrasadas en mayo de ese mismo año, es decir tres meses después de proferida la sentencia, la ejecución del presupuesto de recobros era insignificante durante el primer trimestre de 2007.

Esto indica que existe una barrera en el flujo de los recursos en el sistema de salud causado por el retraso en el pago de los reembolsos y el trámite de las solicitudes de recobro al Fosyga, que afecta el goce efectivo del derecho a la salud de los usuarios del sistema. Por otra parte, como también lo reconoció el Consejo de Estado, por tratarse de recursos públicos, la auditoria de las solicitudes y la verificación de que se trate de obligaciones que no le corresponden a las EPS es de suma importancia para el sistema de salud habida cuenta de que se trata de recursos de destinación específica.

Los obstáculos en el flujo de recursos en el sistema, por ejemplo en las EPS, deriva en una desprotección del derecho a la salud al impedir que los servicios se presten oportunamente, que se mejore la prestación de los servicios a través de la inversión en tecnología y personal médico, que se paguen oportunamente a los prestadores los servicios que deben garantizar los aseguradores y otras deficiencias en la prestación de los servicios asociadas a problemas de liquidez.

#### *6.2.2.2. Ordenes específicas a impartir.*

Por las anteriores razones, en la parte resolutive de esta providencia se ordenará al Ministerio de la Protección Social y a Fidufosyga 2005, que si aún no lo han hecho, diseñen un plan de contingencia para (i) adelantar el trámite de las solicitudes de recobro que están en mora y (ii) efectuar los pagos de las solicitudes de recobro en las que se verificó el cumplimiento de los requisitos de las resoluciones vigentes que están en mora. Este plan deberá precisar: (i) metas específicas para el cumplimiento de la presente orden, (ii) un cronograma para el cumplimiento de las órdenes y (iii) las acciones que se llevarán a cabo para el cumplimiento de las metas, individualizando en cada caso el responsable de su cumplimiento.

El Plan deberá ser presentado ante el Comité de Verificación creado por el Consejo de Estado y ante la Corte Constitucional en la fecha señalada en la parte resolutive de esta providencia. En caso de que no se cumpla la fecha estipulada para haber efectuado el reembolso de al menos el 50% de las solicitudes de recobro que están atrasadas en el trámite, independiente de la glosas que tengan, operará un mecanismo de compensación general para dicho

50. El 50% restante deberá haber sido cancelado en su totalidad antes de la fecha señalada en la parte resolutive de esta providencia.

En caso de que posteriormente se verifique que el Fosyga no estaba obligado a realizar determinados reembolsos, deberá adoptar las medidas para compensar esos recursos, con la correspondiente EPS.

Sobre la ejecución del Plan de Contingencia el Ministerio de Protección Social y el administrador del Fosyga, presentarán un informe cada dos meses al Comité de Verificación.

### **6.2.3. Orden de corregir las trabas en el sistema de recobros.**

#### *6.2.3.1. Análisis del problema y de la situación actual.*

Lo anterior también muestra que existe un problema de flujo de recursos en el sistema que no se ha logrado satisfacer con el actual mecanismo de recobro. Adicionalmente, las solicitudes de recobro al Fosyga tienden a crecer y, en consecuencia, en el monto total que se debe pagar a las aseguradoras por estas reclamaciones según lo indica el documento técnico *Análisis descriptivo preliminar de los recobros en el Sistema General de Seguridad Social en Salud 2002 a 2005*, realizado por el Ministerio y el Programa de apoyo a la reforma de salud PARS. Según este informe, mientras en enero de 2002 los recobros al Fosyga eran menos de 5000, en el 2005 llegaban casi a 30000 (P. 29). Adicionalmente, en el balance resumido de solicitudes de recobro las Entidades Prestadoras de Salud para el año 2006 se constata que el 73% de sus cuentas por cobrar corresponden a deudas del Fosyga.

El gran volumen de solicitudes de recobro bajo el sistema actual implica un alto costo de transacción ya que cada solicitud se debe presentar, ha de ser auditada, y una vez aprobada debe ser pagada de manera individual. Este proceso genera un retraso en el reembolso de las sumas adeudadas y demoras en el flujo oportuno de recursos para financiar el goce efectivo del derecho a la salud. También produce un alto grado de imprevisibilidad en las EPS acerca de la cantidad de recursos disponibles, lo cual a su vez impide que dentro de estas entidades se pueda realizar una adecuada planeación de las inversiones en el sistema, con miras al mejoramiento de la prestación de los servicios. Todo ello ha afectado el derecho de las personas a acceder a los servicios de salud y ha puesto en peligro la vida y la integridad de miles de usuarios del sistema.

En este sentido el Consejo de Estado ha reconocido el impacto negativo de los retrasos del Fosyga en el financiamiento del sistema: “(...) *Actuar como lo viene haciendo el FOSYGA, puede generar un desfinanciamiento del sistema, pues se obliga a las entidades prestadoras a emplear recursos de otras fuentes y con otros destinos, para cubrir, durante largo tiempo, la mora del Estado. || En conclusión, este impacto sobre el flujo de caja de las EPS amenaza y pone en riesgo los derechos colectivos invocados, y por esa razón se concederá el*

*amparo pedido por los actores.”*

De acuerdo con los elementos esenciales del derecho a la salud (*ver sección 3.4.*), el sistema de salud que diseñe el legislador debe contar con recursos económicos *disponibles* para garantizar el goce efectivo del derecho. En tal medida los recursos (i) deben ser *suficientes* para costear los servicios que se requieran para garantizar el goce del derecho según las prioridades y necesidades a cubrir, pero además, (ii) deben ser *utilizables*. Para una persona que requiere que se le garantice el goce efectivo de su derecho a la salud, da lo mismo no poder acceder a un servicio porque el sistema de salud no cuenta con los recursos para costearlo, que no poder hacerlo porque los recursos con que se cuenta no pueden ser usados, en razón a que, por ejemplo, se encuentran invertidos en títulos que no pueden hacerse líquidos de tal manera que los recursos no llegan de manera oportuna a financiar el funcionamiento de los servicio de salud.

La Corte también reconoce que es necesario que se adopten procedimientos de auditoria que aseguren la legalidad y la consistencia de los recobros que se presentan ante el Fosyga. El *Análisis descriptivo preliminar de los recobros en el Sistema General de Seguridad Social en Salud 2002 a 2005*, sobre este aspecto resalta la gran cantidad errores e inconsistencias que se presentan en las solicitudes de reembolso de las entidades promotoras de salud, los cuales desde luego deben ser verificados adecuadamente para garantizar la transparencia en la asignación de los recursos de la salud:

- *“Se encuentran 3.946 (0.75%) registros con fecha inválida, nula o fuera del rango.*
- *Aparece una misma entidad registrada con nombres distintos.*
- *Existen 21.662 (4.11%) registros sin información de régimen.*
- *Hay 15.954 (3.03%) registros sin información de diagnóstico, 31.716 (6.02%) sin información de medicamento y 30.825 (5.75%) sin información de procedimiento.*
- *Existen valores presentados y aprobados no razonables como por ejemplo 20021206567876 o 2002120698600, donde parece evidente un error en el valor unido con la fecha.*
- *No existe información epidemiológica de los recobros presentados por fallo de tutela en el periodo Junio de 2003 a Febrero de 2005.*
- *No hay ningún criterio claro de unificación de diagnósticos, por lo cual se encuentran diagnósticos iguales con nombres*

*distintos. Igual situación se presenta tanto en medicamentos, como en procedimientos donde aparece el mismo medicamento o procedimiento con múltiples nombres.*

*Si bien algunos de estos errores son subsanables, es innegable que evidencian graves problemas en el registro y captura de la información de los recobros presentados ante el FOSYGA.”(página 4)*

El escenario descrito muestra la necesidad de tomar medidas para mejorar el sistema de recobros actual con la finalidad de garantizar el flujo oportuno de recursos en el sistema. Sin embargo, no compete al juez constitucional establecer cuál es la forma en que se deben superar los defectos que le impiden a la administración pública contar con la capacidad institucional que le permita adoptar las medidas adecuadas y necesarias para garantizar efectivamente a la población el mayor nivel de salud posible, habida cuenta de los recursos disponibles. No obstante, sí es función del juez constitucional impartir las órdenes necesarias para que los órganos competentes para adoptar estos correctivos, si no lo han hecho o no lo están haciendo, de acuerdo al mandato constitucional, los tomen lo más pronto posible.

#### *6.2.3.2. Ordenes específicas a impartir.*

Por las anteriores razones, en la parte resolutive de esta providencia se ordenará al Ministerio de Protección Social que tome las medidas necesarias para que el sistema de verificación, control y pago de las solicitudes de recobro funcione de manera eficiente, y que el Fosyga desembolse prontamente los dineros concernientes a las solicitudes de recobro. El Ministerio de Protección Social podrá definir el tipo de medidas necesarias. Por ejemplo, éstas podrían consistir en cambios de tipo gerencial, tales como la contratación de personal que ayude a evacuar las solicitudes de acuerdo al sistema actual.

Otras medidas podrían comprender el rediseño del sistema de recobro. El nuevo sistema podría seguir teniendo un flujo de ingreso de solicitudes, de tal manera que éstas sean verificadas una a una, pero a la vez, un flujo de desembolsos que no dependa de la aceptación de las solicitudes individuales, sino de cifras globales definidas anteriormente con base en estimativos de reembolsos a cada EPS, y sujetas a compensación por las diferencias verificadas al final de cada periodo preestablecido. La previsión de un estimativo del monto de recobros por un período de tiempo por cada entidad aseguradora, con base en el histórico de recobros de cada entidad, y la correspondiente compensación de acuerdo a los recobros efectiva y legalmente causados, agilizaría el flujo de recursos para financiar servicios de salud y aseguran el goce efectivo del derecho. A su vez, cualquiera sistema que sea diseñado por la Comisión podrá prever desincentivos para las entidades que supediten a la presentación de acciones de tutela la autorización de servicios médicos requeridos y recobrados.

El Ministerio podrá diseñar el sistema que considere más adecuado, teniendo en cuenta (i) la garantía del flujo oportuno y efectivo de recursos, (ii) la definición de un trámite ágil y claro para auditar cada solicitud de recobro sin que el tiempo que dure el auditaje obstaculice el flujo de los recursos, (iii) la transparencia en la asignación de los recursos del Fosyga y (iv) la asignación de los recursos para la atención eficiente de las necesidades y prioridades de la salud.

El Ministerio de Protección Social deberá remitir a la Corte Constitucional la regulación mediante la cual se adopte este nuevo sistema y la fecha de iniciación.

### **6.3. Órdenes para proteger el derecho a la información en salud; carta de derechos y carta de desempeño.**

#### *6.3.1. Análisis del problema y de la situación actual.*

6.3.1.1. Además de los aspectos indicados antes relativos a las fallas en la regulación del POS y de los recobros ante el Fosyga, otros aspectos del sistema presentan algunos problemas que merecen la atención de la Sala con miras a determinar medidas que contribuyan a garantizar la protección del derecho a la salud.

Previamente en esta sentencia (*ver sección 4.3.*), se precisó el significado del derecho a la información en el marco del derecho a la salud. Allí se indicó que *las entidades del Sistema de Salud tienen la obligación de brindar a las personas la información que sea necesaria para poder acceder a los servicios de salud que requieran, con libertad y autonomía, permitiendo que la persona elija la opción que su entender, le garantice en mayor medida su derecho.* Este derecho se manifiesta a través de obligaciones de diferente tipo, como la garantía de que el consentimiento para los procedimientos médicos sea informado o el deber de brindar información y acompañamiento para obtener los servicios de salud requeridos, que se encuentran fuera del plan de beneficios.

Entre las facetas del derecho a la información que debe ser protegida para garantizar el goce efectivo del derecho a la salud, se encuentra el derecho a recibir información sobre los derechos y los deberes que, dentro del Sistema de Seguridad Social en Salud, corresponden a cada uno de los actores: usuarios, estado, aseguradores y prestadores. A pesar de su importancia, la Defensoría del Pueblo ha resaltado en el informe sobre la evaluación de las Entidades Promotoras de Salud (*Evaluación de los servicios de salud que brindan las Empresas Promotoras de Salud, 2005, Índice de satisfacción de usuarios*) que uno de los indicadores mas bajos en la prestación de los servicios de salud es el de información a los usuarios sobre derechos y deberes. Entre otros, la entidad señaló que en “*información sobre servicios y derechos, cerca del 50% de las EPS tuvieron puntaje deficientes, siendo el*

*componente de invitaciones de promoción el más bajo. (...)”.*

6.3.1.2. El Ministerio de la Protección Social ha realizado esfuerzos para avanzar en este tema. En el año 2006, como parte del Programa de Apoyo a la Reforma en el Sector Salud, PARS, el Ministerio elaboró y publicó un documento denominado *ABC del Sistema de Protección Social, Deberes y derechos, Seguridad social y Asistencia social, Guía de Consulta para usuarios y comunidades*, dirigida a explicar los aspectos más importantes del sistema general de seguridad social. Este documento fue adoptado en el marco de una campaña publicitaria sobre los derechos y los deberes de las personas en el sistema de salud, difundida por diferentes medios de comunicación. Entre otros, allí se elabora un listado de los derechos y de los deberes de los usuarios en el sistema.

6.3.1.3. A los pocos meses de que se adoptara la Constitución de 1991, en noviembre de aquel año, el Ministerio incorporó al ordenamiento jurídico nacional la Declaración de Lisboa de la Asociación Médica Mundial (adoptada por la 34ª Asamblea en 1981) sobre *los derechos del paciente* (Resolución 13437 de 1991, Ministerio de la Salud). El decálogo de los derechos del paciente es el siguiente:

*“1. Su derecho a elegir libremente al médico y en general a los profesionales de la salud, como también a las instituciones de salud que le presten la atención requerida, dentro de los recursos disponibles del país.*

*2. Su derecho a disfrutar de una comunicación plena y clara con el médico, apropiadas a sus condiciones psicológicas y culturales, que le permitan obtener toda la información necesaria respecto a la enfermedad que padece, así como a los procedimientos y tratamientos que se le vayan a practicar y el pronóstico y riesgos que dicho tratamiento conlleve. También su derecho a que él, sus familiares o representantes, en caso de inconsciencia o minoría de edad consientan o rechacen estos procedimientos, dejando expresa constancia ojalá escrita de su decisión.*

*3. Su derecho a recibir un trato digno respetando sus creencias y costumbres, así como las opiniones personales que tenga sobre la enfermedad que sufre.*

*4. Su derecho a que todos los informes de la historia clínica sean tratados de manera confidencial y secreta y que, sólo con su autorización, puedan ser conocidos.*

*5. Su derecho a que se le preste durante todo el proceso de la enfermedad, la mejor asistencia médica disponible, pero respetando los deseos del paciente en el caso de enfermedad irreversible.*

6. *Su derecho a revisar y recibir explicaciones acerca de los costos por los servicios obtenidos, tanto por parte de los profesionales de la salud como por las instituciones sanitarias. Al igual que el derecho a que en casos de emergencia, los servicios que reciba no estén condicionados al pago anticipado de honorarios.*

7. *Su derecho a recibir o rehusar apoyo espiritual o moral cualquiera que sea el culto religioso que profesa.*

8. *Su derecho a que se le respete la voluntad de participar o no en investigaciones realizadas por personal científicamente calificado, siempre y cuando se haya enterado acerca de los objetivos, métodos, posibles beneficios, riesgos previsibles e incomodidades que el proceso investigativo pueda implicar.*

9. *Su derecho a que se le respete la voluntad de aceptación a rehusar la donación de sus órganos para que estos sean trasplantados a otros enfermos.*

10. *Su derecho a morir con dignidad y a que se le respete su voluntad de permitir que el proceso de la muerte siga su curso natural en la fase terminal de su enfermedad.”*

6.3.1.4. Si bien iniciativas como la del Ministerio contribuyen a informar a los usuarios sobre su posición en el sistema de salud, tener claridad acerca de los derechos y de los deberes es un derecho que tienen los usuarios del sistema desde antes de ingresar a él ya que es necesario para el pleno ejercicio del derecho a la salud dentro del sistema.

En efecto, el derecho a la información no sólo debe ser garantizado a las personas cuando hacen parte del sistema de salud, sino desde antes de que ingresen a él. La información debe servirle a las personas para que la puedan elegir de manera informada la EPS y la IPS que desean que les preste los servicios de salud, en función de sus necesidades, además de que una vez dentro del Sistema, el ejercicio de los derechos sea pleno. Como mínimo ante la decisión de ingresar a una EPS o de elegir una IPS, una persona debería conocer, además de sus derechos y deberes, (i) cuáles son las opciones de afiliación con las que cuenta, y (ii) el desempeño de cada una de estas instituciones, en función del respeto al goce efectivo del derecho a la salud. Tener información confiable acerca del comportamiento de EPS e IPS, acerca del cumplimiento de sus obligaciones y de la protección de los derechos de los usuarios contribuye a la adopción de decisiones informadas para escoger entidades.

6.3.1.5. Para fortalecer este aspecto del derecho a la información la Defensoría del Pueblo realizó la *Evaluación de los servicios de salud que brindan las Empresas Promotoras de Salud, 2005, Índice de satisfacción de usuarios*, que también había sido presentada en el 2003. Por su parte, el Ministerio de la

Protección Social dentro del Programa de Apoyo a la Reforma en Salud, PARS, ha elaborado una metodología para realizar un *ranking* de EPS e IPS. Sobre la finalidad de elaborar este *ranking*, la misma entidad ha resaltado la importancia de que los usuarios del sistema conozcan la manera en que las IPS y las EPS prestan los servicios. Al respecto sostuvo lo siguiente: *“El estudio incluye el diseño y calculo de un ranking de las Entidades Promotoras de Salud – EPS, el cual mide calidad y cumplimiento en el servicio. Sus resultados permiten a los usuarios fortalecer su capacidad para elegir libremente su EPS y a las entidades, tomar decisiones de mejoramiento a partir de información objetiva.”* Y en relación con las IPS señaló que *“[e]l ranking ofrece información sobre todas las IPS públicas y privadas del orden nacional que tienen servicios de hospitalización y están inscritas en el Registro Especial de Prestadores. Sus resultados promueven la calidad entre los operadores, estimulan la sana competencia, permiten a los usuarios escoger su IPS con argumentos de calidad en el servicio y garantizan al sistema contar con insumos para la toma de decisiones.”*

Sin embargo, es fundamental asegurar que estos resultados sean entregados a los usuarios del sistema de salud oportunamente para que puedan adoptar decisiones informadas y que la información sea actualizada periódicamente.

#### *6.3.2. Órdenes específicas a impartir.*

Por las anteriores razones, en la parte resolutive de esta providencia se ordenará al Ministerio de la Protección Social que si aún no lo han hecho, en la fecha indicada en la parte resolutive de la sentencia, adopte las medidas necesarias para asegurar que al momento de afiliarse a una EPS, contributiva o subsidiada, le entreguen a toda persona, en términos sencillos y accesibles, la siguiente información,

(i) *Una carta con los derechos del paciente.* Esta deberá contener, por lo menos, los derechos contemplados en la Declaración de Lisboa de la Asociación Médica Mundial (adoptada por la 34ª Asamblea en 1981) y los contemplados en la parte motiva de esta providencia, en especial, en los capítulos 4 y 8. Esta *Carta* deberá estar acompañada de las indicaciones acerca de cuáles son las instituciones que prestan ayuda para exigir el cumplimiento de los derechos y cuáles los recursos mediante los cuales se puede solicitar y acceder a dicha ayuda, sin tener que acudir a la acción de tutela.

(ii) *Una carta de desempeño.* Este documento deberá contener información básica acerca del desempeño y calidad de las diferentes EPS a las que se puede afiliarse en el respectivo régimen, así como también acerca de las IPS indicando cuáles trabajan con cuáles. El documento deberá contemplar la información necesaria para poder ejercer adecuadamente su libertad de escogencia. Este documento deberá ser elaborado por el Ministerio de la Protección Social.

Este documento habrá de ser elaborado por el Ministerio de Protección Social, con base en la información disponible de los resultados de la gestión de las EPS y de las IPS, que puede incluir, pero no limitarse, al *ranking* mencionado en párrafos anteriores. En particular, el Ministerio habrá de hacer una ponderación entre, de una parte, la accesibilidad del mencionado documento a personas que no cuentan con conocimientos técnicos acerca del sistema de salud, y de otra, la presentación de una información que refleje de manera suficiente la realidad del desempeño de las EPS e IPS. Cabe señalar dos ejemplos de dos extremos indeseables. El entregar un *ranking* simple (1ª, 2ª etc.) como única información de la carta de desempeño puede producir un desequilibrio entre la reacción de los consumidores y el desempeño de las empresas ‘rankeadas’, pues no muestra de manera explícita las diferentes facetas de la prestación del servicio, e impide observar la diferencia real en los resultados de las empresas. En el otro extremo, el entregar un sinnúmero de estadísticas complejas acerca de cada una de las EPS o IPS, lleva a una carta de desempeño que es incomprensible para la mayoría de usuarios.

Además se ordenará al Ministerio de la Protección Social y a la Comisión de Regulación en Salud que adopten las medidas necesarias para proteger a las personas a las que se les desproteja el derecho que tienen a acceder a la información idónea que les permita ejercer su libertad de elección de la entidad encargada de garantizarles el acceso a los servicios de salud. Dentro de las reglas que se establezcan para el efecto, podrá incluirse que en aquellos casos en los cuales la información no sea suministrada previamente, no tendrán limitación de tiempo para poder ejercer su libertad de cambiarse de entidad promotora de salud.

## **6.4. Órdenes sobre cobertura universal**

### *6.4.1. Análisis del problema y de la situación actual*

6.4.1.1. Dentro de los procesos acumulados en este expediente se encuentran tres en los cuales se demanda a oficinas de salud municipales por el incumplimiento de sus obligaciones en la atención en salud para con personas ‘vinculadas’ al sistema general de seguridad social en salud. Se trata de los procesos T-1320406, T-1335279 y T-1338650. Concretamente, en los dos primeros se demanda al Departamento Administrativo Distrital de Salud – DADIS – de Cartagena, por cuanto los actores no habían recibido unos servicios que requerían, porque, respectivamente, la IPS responsable no había cumplido con la labor que le correspondía y el DADIS no tenía IPS contratadas para realizar los exámenes indicados. Por su parte, en el tercero se demanda a la Secretaría de Salud de Valledupar, por cuanto se niega a sufragarle a una persona sus gastos de estadía en Medellín, donde debía ser operado.

La existencia de estos casos hace patente que el sistema de salud en el país aún no se ajusta al principio de universalidad, uno de los principios basilares de la seguridad social contemplados en el artículo 48 de la Constitución,

norma que establece que la seguridad social ‘se prestará bajo la dirección, coordinación y control del Estado, en sujeción a los principios de eficiencia, universalidad y solidaridad, en los términos que establezca la ley.’

6.4.1.2. La importancia de asegurar la cobertura universal en salud fue resaltada desde los mismos debates que precedieron a la aprobación de la Ley 100 de 1993. En este sentido, en la ponencia para el primer debate del proyecto de ley se manifestaba, en la parte general en que se trataba sobre la reforma al sistema de salud, lo siguiente,

*“La principal carencia que pretende enfrentar el proyecto es la falta de universalidad del sistema actual. Para lograr este propósito, se han diseñado instrumentos para obtener una cobertura total de la población en un plazo bastante razonable. Con tal fin se propone la obligatoriedad de la afiliación al Sistema de Seguridad Social, ampliar la cobertura de la afiliación a la familia, y la puesta en práctica de un sistema de subsidios directos que permita a la población más pobre vincularse al sistema, a través de sus instituciones. Esta universalidad, por demás, va aparejada de un propósito de obtener la integralidad en la cobertura en salud para la atención de todos los colombianos.”*

Y luego, en la parte donde se describía el articulado del proyecto en el punto sobre la seguridad social en salud, se decía,

*“Vale la pena destacar que la propuesta de reforma busca cumplir con el mandato constitucional de la universalidad. (...)*

*Este es un objetivo fundamental de la reforma. Lograr un aumento de la cobertura del sistema de salud. Ello es un imperativo. Los grupos más pobres de la población colombiana que han tenido una deficiente cobertura, entre los cuales podemos considerar a los indigentes, a los trabajadores de bajos ingresos del sector informal y a los campesinos, son los grupos objetivo hacia los cuales va dirigida principalmente la reforma.*

*El principal instrumento para garantizar que la universalidad sea una realidad es la creación del sistema subsidiado, que ofrecerá financiamiento especial para aquellos con menor capacidad de pago. El sistema no podrá, como ahora sucede, discriminar por razón de capacidad de pago o riesgo a ningún usuario. Este es el principal instrumento para lograr efectivamente la ampliación de la cobertura, que es mandato constitucional.”*

En vista de lo anterior, la Ley 100 de 1993 incorporó la universalidad como uno de los principios que debe orientar la actividad del Estado en materia de la prestación del servicio de seguridad social en salud. Por eso, en la Ley se determinó que el sistema general de seguridad social en salud tendría una

cobertura universal. En el primer inciso del artículo 162 se fijó un plazo máximo para alcanzar este objetivo, en los siguientes términos: *“El Sistema General de Seguridad Social de Salud crea las condiciones de acceso a un Plan Obligatorio de Salud para todos los habitantes del territorio nacional antes del año 2001”*.

De la misma manera, en el artículo 157, que estableció los tipos de participantes en el sistema general de seguridad social en salud, se dispuso que habría afiliados al régimen contributivo y al subsidiado y, además, participantes vinculados *“en forma temporal.”* La transitoriedad de la categoría de los participantes vinculados se destacaba en el mismo artículo al establecerse en el último inciso que *“[a] partir del año 2000, todo colombiano deberá estar vinculado al sistema a través de los regímenes contributivo o subsidiado, en donde progresivamente se unificarán los planes de salud para que todos los habitantes del territorio nacional reciban el plan obligatorio de salud de que habla el artículo 162.”*

6.4.1.3. A pesar de lo anterior, el plazo fijado por la Ley 100 de 1993 para obtener la cobertura universal en salud transcurrió sin que se hubiera alcanzado la meta trazada.

En 2006, el Congreso de la República debatió una reforma a la Ley 100 de 1993, en la cual se destacó nuevamente la necesidad de lograr la cobertura universal en salud. En la exposición de motivos, presentada por el Ministro de la Protección Social, se expresó al respecto:

*“Desde 1993 con la implantación del Sistema General de Seguridad Social en Salud, SGSSS, ha habido un considerable avance en los índices de cobertura de aseguramiento; ese proceso tiene una formidable aceleración en los últimos dos años a iniciativa del Gobierno Nacional y con la cofinanciación de las entidades territoriales. Cálculos del Ministerio de la Protección Social indican que aproximadamente el 82% de la población colombiana se encuentra afiliada al Sistema de Seguridad Social en Salud, de la cual 38% se encuentra afiliada al Régimen Contributivo y 44% al Régimen Subsidiado. A pesar de los avances y del gran salto de los últimos dos años, no se ha logrado la meta de universalizar la cobertura prevista para el año 2001. Es preocupante que alrededor del 18% de la población, aproximadamente 7 millones de personas, no se encuentre asegurada en ninguno de los dos regímenes establecidos, y que la mayor parte de los no asegurados sean personas de los niveles más pobres.*

*Las consecuencias sociales de la falta de cobertura de aseguramiento han sido evaluadas en forma exhaustiva. Se ha encontrado que los problemas asociados a la falta de un seguro de salud no se limitan a los costos económicos ocasionados por un pobre estado de salud y sus consecuencias sobre el estado funcional*

*y desarrollo de niños y adultos, sino que incluyen el impacto sobre la estabilidad económica y el bienestar psicosocial de las familias, además de las externalidades negativas sobre las instituciones, la economía local y la salud de la población que se generan en comunidades donde hay un gran número de individuos no asegurados. Esta evidencia soporta el planteamiento de que los principales esfuerzos del Gobierno Nacional se deben continuar dirigiendo a reducir el número de colombianos sin seguro de salud y lograr la cobertura universal, con particular énfasis en la población más pobre y vulnerable.*

*Además del riesgo financiero y de las barreras al acceso a los servicios de salud que implica la falta de un seguro para la población, no haber logrado la cobertura universal también genera grandes ineficiencias en el funcionamiento del SGSSS. Primero, existe un sistema dual de subsidios a la oferta y a la demanda donde las responsabilidades de atención de la población son confusas y encontradas, que dificulta la planeación, gestión y vigilancia de los recursos lo cual implica una operación más costosa, y que genera inequidades en el acceso a los servicios de salud. Segundo, conlleva a que el esquema de aseguramiento existente opere en condiciones sub óptimas, ya que con el aseguramiento universal se podría obtener una mejor dispersión del riesgo en salud y del riesgo financiero, se reduciría el problema de selección adversa, y sería más claro que los aseguradores son los responsables últimos de la salud de la población.*

*En los últimos 2 años se ha ampliado la cobertura de aseguramiento en el Régimen Subsidiado en aproximadamente 8 millones de personas. Estos avances se han obtenido gracias a la efectiva presupuestación y ejecución de los recursos Fosyga, al incremento de los recursos disponibles para subsidios a la demanda resultantes de transformación de subsidios de oferta, y, en general, a una mejor gestión de las fuentes de financiamiento existentes.*

*(...)*

*Es prioritario dirigir los esfuerzos de ampliación de cobertura por medio de subsidios a la demanda para la población pobre, que en la actualidad viene siendo identificada por medio del Sisbén. Se debe financiar la totalidad de la Unidad de Pago por Capitación Subsidiada, UPC-S, que defina el Consejo Nacional de Seguridad Social en Salud para las personas que hacen parte de las categorías 1 y 2 del Sisbén, y financiar una parte, no menos del 50%, de dicha UPC-S para las personas en la categoría 3 del Sisbén recaudando un aporte que cubra la diferencia con el valor de la cotización mínima aplicable en el Régimen Contributivo para los trabajadores*

*independientes y reglamentando los derechos de las personas beneficiarias del subsidio cuya contribución no sea factible recaudar.*

*Se estima que aproximadamente 30 millones de personas pertenecen a las categorías Sisbén 1, 2 y 3. De estas, 25 millones se encuentran en los niveles Sisbén 1 y 2, y 4,8 millones en el nivel Sisbén 3. Tomando en cuenta aproximadamente 5 millones de personas de los niveles 1, 2 y 3 del Sisbén están afiliadas al Régimen Contributivo, y que es importante mantener la afiliación de estas personas a dicho régimen, la población total elegible para subsidios ya sean totales o parciales podría ser de 25 a 26 millones de personas.*

*Afiliar 6 millones de personas más con subsidio pleno costaría un billón trescientos mil millones adicionales al gasto actual y un millón adicional de subsidios parciales más el ajuste de los actuales costarían cerca de 200.000 millones adicionales. Para tener cobertura universal con estas ampliaciones y la continuidad de lo existente se requieren no menos de 1.700.000 millones de pesos adicionales que deberán definirse anualmente en los presupuestos del Fosyga y en el Presupuesto General de la Nación y que pueden incluir una importante transformación de por lo menos 500.000 millones de pesos de subsidios de oferta a demanda en el Sistema General de Participaciones.”*

La reforma fue aprobada mediante la Ley 1122 de 2007, “*Por la cual se hacen algunas modificaciones en el Sistema General de Seguridad Social en Salud y se dictan otras disposiciones.*” En concordancia con lo debatido en el Congreso de la República, en el artículo 9 de la Ley se fijó un nuevo plazo para lograr la cobertura universal de aseguramiento: “*El Sistema General de Seguridad Social en Salud alcanzará en los próximos tres años, la cobertura universal de aseguramiento en los niveles I, II y III del Sisbén de las personas que cumplan con los requisitos para la afiliación al Sistema.*”

La meta fijada en la Ley 1122 de 2007 fue corroborada en el Plan Nacional de Desarrollo, aprobado mediante la Ley 1151 de 2007. En el apartado de la Ley que se ocupa del plan de inversiones públicas, en el punto (3.3.), referido al sistema de protección social como mecanismo de reducción de la pobreza y promoción del empleo y la equidad, se estableció lo siguiente acerca de la cobertura universal en salud,

*“En términos de seguridad social en salud, se tiene como meta la universalización del aseguramiento. Para ello se implementarán tres estrategias:*

*i) Universalización del Régimen Subsidiado para la Población Sisbén 1 y 2;*

*ii) Implementación de subsidios parciales a la cotización del régimen subsidiado o contributivo para la población en transición (nivel 3 del Sisbén); y*

*iii) Incremento de la afiliación al régimen contributivo y actualización del plan de beneficios. Esto implicará, entre otras, reducir la evasión y elusión de aportes al régimen contributivo, a través de la implementación universal de la planilla integrada de aportes y la interoperabilidad de los Sistemas y Registros de Información de Aportantes (RUA), afiliados (RUAF) y el Sisbén; incrementar, hasta medio punto, el aporte de cotizaciones a cargo del empleador al Sistema General de Seguridad Social en Salud (SGSSS) a partir de 2007; y transformar los recursos de subsidio de oferta a demanda a partir de esa misma fecha. Igualmente, se promoverá el adecuado flujo de recursos y el saneamiento de la cartera de las Instituciones Prestadoras de Servicios de Salud, de acuerdo a los lineamientos del Conpes.”*

Tal como se advierte en la exposición de motivos del proyecto que se convirtió en la Ley 1122 de 2007, en los últimos años las autoridades del sistema de salud han logrado importantes avances en la ampliación de cobertura del régimen subsidiado. Esta gestión ha sido impulsada también a partir de las decisiones judiciales. El 16 de mayo de 2007, a raíz de una acción popular, el Consejo de Estado dictó una sentencia en la que determinó que los recursos aforados en el sistema para la ampliación de la cobertura del régimen subsidiado, con miras a alcanzar la cobertura universal en salud, no habían sido destinados según el mandato de la Constitución y la Ley. Por esta razón, dispuso proteger los derechos colectivos a la moralidad administrativa y el acceso al servicio público de salud. En la providencia se ordenó:

*“Inaplicar el artículo 5°. Literal c del Decreto Reglamentario 050 de 2003.*

*En consecuencia, declarar que los recursos de la subcuenta de solidaridad del FOSYGA, en tanto parafiscales, no se encuentran sujetos a apropiación presupuestal en los términos del artículo 29 del Estatuto Orgánico de Presupuesto, razón por la cual, no deben incorporarse al presupuesto para efectos de su ejecución. Los criterios para su presupuestación y gasto corresponden de manera exclusiva al Consejo Nacional de Seguridad Social en Salud en conformidad con los artículos 172 numeral 12 y 218 de la Ley 100 de 1993.*

*Ordenar al Consejo Nacional de Seguridad Social en Salud y al Ministerio de la Protección Social, ejecutar dentro del término*

*improrrogable de un (1) año contado a partir de la ejecutoria de este fallo, la totalidad de los excedentes financieros de la subcuenta de solidaridad del FOSYGA y sus respectivos rendimientos en ampliación de cobertura de los entes territoriales. Para el efecto, el Consejo Nacional de Seguridad Social en Salud, con la colaboración de la Dirección General de Financiamiento del Ministerio de la Protección Social, el Departamento Nacional de Planeación y quien ejerza como administrador fiduciario del FOSYGA, deberá establecer los criterios de aplicación de estos recursos y el cronograma para su ejecución. Tales criterios deberán ser acogidos mediante Acuerdo del CNSSS y entregados al Comité de Verificación y Seguimiento, en un término máximo de tres (3) meses contados a partir de la ejecutoria de esta providencia.*

*Integrar un Comité de Verificación y Seguimiento en el que participe la Superintendencia Nacional de Salud, la Contraloría General de la República y la Procuraduría General de la Nación a través de la Procuraduría Delegada para la Vigilancia Preventiva de la Función Pública, con el fin de verificar la expedición del Acuerdo por el cual se establezcan las condiciones de ejecución de los excedentes financieros de la subcuenta de solidaridad del FOSYGA, su efectiva ejecución mediante informes bimensuales, así como el cumplimiento de las metas de universalidad planteadas en las proyecciones establecidas en el Oficio de fecha 30 de noviembre de 2006 y en el Plan Nacional de Desarrollo.”*

En cumplimiento de esta orden, el Consejo Nacional de Seguridad Social en Salud ha proferido distintos acuerdos en el año 2008, entre los cuales se encuentran: el Acuerdo 377, ‘*Por el cual se establecen los criterios de aplicación de los excedentes financieros de la Subcuenta de Solidaridad del Fondo de Solidaridad y Garantía-FOSYGA para darle cumplimiento al fallo del Consejo de Estado*’; el Acuerdo 383, ‘*Por el cual se adicionan recursos a la Subcuenta de Solidaridad del Fondo de Solidaridad Garantía, FOSYGA aprobado mediante el Acuerdo 376, para dar cumplimiento al fallo del Consejo de Estado con fecha de ejecutoria del 12 de noviembre de 2007 y se dictan otras disposiciones*’; y el Acuerdo 384, ‘*Por el cual se fijan los criterios de distribución de los recursos del FOSYGA para ampliación de cobertura del Régimen Subsidiado en la vigencia 2008 y se dictan otras disposiciones.*’

6.4.1.4. Como se observa, a pesar del incumplimiento del mandato contenido en la Ley 100 de lograr la cobertura universal del sistema general de seguridad social en salud para el año 2001, en los últimos años se han dado pasos muy importantes en esa dirección, tanto en el nivel legislativo como en el de las políticas públicas concretas. Es así como el Congreso ha fijado plazos específicos para alcanzar la cobertura universal. Al mismo tiempo, el Gobierno Nacional ha logrado importantes avances en la ampliación del régimen subsidiado. De la misma manera, el Consejo de Estado ha proferido

órdenes dirigidas al cumplimiento de las metas de universalización del servicio de seguridad social en salud.

La Corte destaca el compromiso general de las instituciones del Estado con el propósito de lograr la cobertura universal. Ello representa un gran avance en la aplicación del principio de universalidad de la seguridad social en salud, contemplado en el artículo 48 de la Constitución. Al mismo tiempo, en vista de que ya se ha presentado un incumplimiento del término fijado en la Ley 100 para la universalización de la seguridad social en salud, enfatiza la necesidad de cumplir con el nuevo plazo que ha fijado el legislador para alcanzar la meta de la cobertura universal.

#### *6.4.2. Orden específica a impartir.*

Por esta razón, en la parte resolutive de esta sentencia se ordenará al Ministerio de Protección Social que adopte las medidas necesarias para asegurar la cobertura universal sostenible del Sistema General de Seguridad Social en Salud antes de la fecha fijada por el legislador y señalada en la parte resolutive de esta providencia y que informe cada seis meses a la Corte Constitucional y a la Defensoría del Pueblo sobre los avances parciales que se obtengan en el proceso de cumplimiento de esa meta. En caso de que alcanzar esta meta sea imposible, deberá explicarse las razones del incumplimiento y fijarse una nueva meta, debidamente justificada.

### **7. Temas relacionados con la protección del derecho a la salud en los cuales no se adoptan órdenes atinentes a las fallas en la regulación**

La Sala también constató que en algunos aspectos que hacen parte de la protección del derecho fundamental a la salud, si bien se presentan problemas, no existe una falla estructural que afecte la protección del derecho, o bien esta fue identificada por la administración y se han venido adoptando medidas que justifican que la Corte Constitucional se abstenga de adoptar medidas al respecto en la presente sentencia. Así sucede con la prevención en salud.

El artículo 49 de la Constitución incluye la promoción de la salud dentro de los componentes del servicio de salud a cargo del Estado: “*Se garantiza a todas las personas el acceso a los servicios de promoción, protección y recuperación de la salud*”. La Ley 100 de 1993 organizó la prestación de los servicios de prevención como un sistema en el que concurren la nación, a través de las acciones del Ministerio de Protección Social, los entes territoriales y las aseguradoras, entre otros, a través de los Planes Obligatorios de Salud.

En relación con las competencias del Ministerio de Protección Social en materia de promoción de la salud y salud pública, esta Ley señala en el artículo 170 lo siguiente: “*El Sistema General de Seguridad Social en Salud está bajo la orientación y regulación del Presidente de la República y del Ministerio de Salud y atenderá las políticas, planes, programas y prioridades*

*del gobierno frente a la salud pública, en la lucha contra las enfermedades endémicas y epidémicas y el mantenimiento, educación, información y fomento de la salud, de conformidad con el plan de desarrollo económico y social y los planes territoriales de que tratan los artículos 13 y 14 de la Ley 60 de 1993.”*

En cuanto a las competencias de los entes territoriales se indica en el artículo 174 de la misma norma, que el *‘Sistema General de Seguridad Social en Salud integra, en todos los niveles territoriales, las instituciones de dirección, las entidades de promoción y prestación de servicios de salud, así como el conjunto de acciones de salud y control de los factores de riesgo en su respectiva jurisdicción y ámbito de competencia. (...) corresponde a los departamentos, distritos y municipios, funciones de dirección y organización de los servicios de salud para garantizar la salud pública y la oferta de servicios de salud por instituciones públicas, por contratación de servicios o por el otorgamiento de subsidios a la demanda.’*

Recientemente, la Ley 1122 de 2007 reformó algunos aspectos del Sistema General de Seguridad Social en Salud entre ellos el sistema de promoción de la salud. Esta reforma se orientó a afianzar las competencias de cada uno de los actores del sistema en las acciones de prevención y, de manera fundamental, a unificar los lineamientos de salud pública en un Plan Nacional de Salud Pública que si bien debe ser diseñado por el Ministerio de la Protección Social como órgano rector del sistema de salud, incluye la definición de acciones específicas a cargo de los entes territoriales y de las entidades promotoras de salud.

Después de definir el concepto de salud pública en el artículo 32, se ordenó la definición del Plan Nacional de Salud Pública y se especificaron algunos de sus contenidos:

*“Artículo 33. Plan nacional de salud pública. El Gobierno Nacional definirá el Plan Nacional de Salud Pública para cada cuatrienio, el cual quedará expresado en el respectivo Plan Nacional de Desarrollo. Su objetivo será la atención y prevención de los principales factores de riesgo para la salud y la promoción de condiciones y estilos de vida saludables, fortaleciendo la capacidad de la comunidad y la de los diferentes niveles territoriales para actuar. Este plan debe incluir:*

*a) El perfil epidemiológico, identificación de los factores protectores de riesgo y determinantes, la incidencia y prevalencia de las principales enfermedades que definan las prioridades en salud pública. Para el efecto se tendrán en cuenta las investigaciones adelantadas por el Ministerio de la Protección Social y cualquier entidad pública o privada. En materia de vacunación, salud sexual y reproductiva, salud mental con énfasis en violencia intrafamiliar, drogadicción y suicidio;*

*b) Las actividades que busquen promover el cambio de estilos de vida saludable y la integración de estos en los distintos niveles educativos;*

*c) Las acciones que, de acuerdo con sus competencias, debe realizar el nivel nacional, los niveles territoriales y las aseguradoras;*

*d) El plan financiero y presupuestal de salud pública, definido en cada uno de los actores responsables del Sistema General de Seguridad Social en Salud, incluyendo las entidades territoriales, y las EPS;*

*e) Las coberturas mínimas obligatorias en servicios e intervenciones de salud, las metas en morbilidad y mortalidad evitables, que deben ser alcanzadas y reportadas con nivel de tolerancia cero, que serán fijadas para cada año y para cada período de cuatros años;*

*f) Las metas y responsabilidades en la vigilancia de salud pública y las acciones de inspección, vigilancia y control de los factores de riesgo para la salud humana;*

*g) Las prioridades de salud pública que deben ser cubiertas en el Plan Obligatorio de Salud y las metas que deben ser alcanzadas por las EPS, tendientes a promover la salud y controlar o minimizar los riesgos de enfermar o morir;*

*h) Las actividades colectivas que estén a cargo de la Nación y de las entidades territoriales con recursos destinados para ello, deberán complementar las acciones previstas en el Plan Obligatorio de Salud. El Plan de salud pública de intervenciones colectivas, reemplazará el Plan de Atención Básica;*

*i) Los modelos de atención, tales como, salud familiar y comunitaria, atención primaria y atención domiciliaria;*

*j) El plan nacional de inmunizaciones que estructure e integre el esquema de protección específica para la población colombiana en particular los biológicos a ser incluidos y que se revisarán cada cuatro años con la asesoría del Instituto Nacional de Salud y el Comité Nacional de Prácticas de Inmunización;*

*k) El plan deberá incluir acciones orientadas a la promoción de la salud mental, y el tratamiento de los trastornos de mayor prevalencia, la prevención de la violencia, el maltrato, la drogadicción y el suicidio;*

*l) El Plan incluirá acciones dirigidas a la promoción de la salud sexual y reproductiva, así como medidas orientadas a responder a comportamiento de los indicadores de mortalidad materna.*

De manera complementaria con el Plan Nacional de Salud Pública, el parágrafo del mismo artículo establece la obligación para los entes territoriales y las entidades promotoras de salud de presentar un plan operativo anual cuyas metas deben ser evaluadas por el Ministerio.

Con base en esta norma el gobierno nacional adoptó el Plan Nacional de Salud Pública para el cuatrienio 2007-2010 mediante el Decreto 3039 de 2007. El plan se desarrolló con base en cinco líneas política: *La promoción de la salud y la calidad de vida; La prevención de los riesgos; La recuperación y superación de los daños en la salud; La vigilancia en salud y gestión del conocimiento y La gestión integral para el desarrollo operativo y funcional del Plan Nacional de Salud Pública.* En cada una de estas líneas se fijaron responsabilidades a cargo de la nación, de las entidades territoriales y de entidades promotoras de salud, administradoras de riesgos profesionales e instituciones prestadoras de servicios de salud.

Con base en un diagnóstico de la situación de la salud en Colombia a partir de la información contenida en el Censo de Población DANE 2005, las encuestas de calidad de vida, el Estudio Nacional de Salud Mental Colombia 2003, la Encuesta Nacional de Demografía y Salud - ENDS 2005 y la Encuesta Nacional de Situación Nutricional Colombia – ENSIN 2005, entre otros, se fijaron las diez prioridades de la salud en Colombia:

- 1. La salud infantil.*
- 2. La salud sexual y reproductiva.*
- 3. La salud oral.*
- 4. La salud mental y las lesiones violentas evitables.*
- 5. Las enfermedades transmisibles y las zoonosis.*
- 6. Las enfermedades crónicas no transmisibles.*
- 7. La nutrición.*
- 8. La seguridad sanitaria y del ambiente.*
- 9. La seguridad en el trabajo y las enfermedades de origen laboral.*
- 10. La gestión para el desarrollo operativo y funcional del Plan Nacional de Salud Pública.*

En relación con estas prioridades se estipularon las responsabilidades que corresponden a cada uno de los actores del sistema indicados antes. En el Anexo Técnico, finalmente, se establecieron metas precisas y cuantificadas acerca de cómo se quiere mejorar en cada una de las prioridades en salud y las acciones a desarrollar en cada una de las líneas de política. A su vez mediante la Resolución 425 de 2008 se definió la metodología para la implementación, ejecución y seguimiento de los planes territoriales que deben desarrollarse a partir del Plan Nacional de Salud Pública.

Lo anterior muestra, al margen de las posibles deficiencias en prevención que se puedan presentar en el país, que se está avanzando en mejorar la protección de la salud desde el ámbito de la prevención y por organizar los esfuerzos de cada uno de los actores dentro del sistema. El Plan Nacional de Salud Pública, en efecto, fija metas medibles, con responsables claros y con plazos para que sean cumplidas, con base en estudios sobre el perfil epidemiológico del país. Por otra parte, se resalta que todos estos esfuerzos deben ir acompañados de medidas adecuadas de control del cumplimiento de las metas y de difusión de los resultados obtenidos, para lo cual el Ministerio de la Protección Social cuenta ya con un sistema de vigilancia, el *Sistema de Vigilancia de la Salud Pública –SIVIGILA*- reglamentado por el Decreto 3518 de 2006.

Constatando entonces que existen actualmente medidas nuevas para afrontar los problemas de salud pública del país, y que estas están operando hace apenas pocos meses, la Corte, aún cuando reconoce su importancia, no adoptará medidas en relación con esta materia.

Los casos concretos revisados en la presente sentencia, también expusieron temas relacionados con la protección de la salud, que si bien presentan algunos problemas importantes no serán abordados con la finalidad de dar órdenes atinentes a las fallas en la regulación sino que serán estudiados en las condiciones del caso concreto, ya que no se constató que respondieran a una falla estructural o sistemática de la regulación que generara desprotección del derecho a la salud, como el allanamiento a la mora (T-1308199) y la movilidad entre EPS cuando existe mala prestación del servicio (T-1350500).

## **8. Resumen de las decisiones adoptadas**

A continuación, la Sala hará un resumen de las decisiones adoptadas en cada uno de los casos concretos (8.1.) y, posteriormente, un resumen de las órdenes con relación a los problemas jurídicos generales atinentes a las fallas de la regulación.

### **8.1. Resumen respecto de los casos acumulados**

De acuerdo con la jurisprudencia constitucional sobre el acceso a los servicios de salud de calidad y de manera oportuna y eficaz garantizado por el derecho fundamental a la salud en el orden constitucional vigente (*ver capítulo 4*), toda persona cuenta, entre otros, con los siguientes derechos constitucionales,

(i) *Acceso a servicios*. Toda persona tiene derecho a que la entidad encargada de garantizarle la prestación de los servicios de salud, EPS, autorice el acceso a los servicios que *requiere* y aquellos que *requiere con necesidad*, incluso si no se encuentran en el plan obligatorio de salud; obstaculizar el acceso en tales casos implica *irrespetar* el derecho a la salud de la persona. El acceso a los servicios debe ser *oportuno*, de *calidad* y *eficiente*.

(ii) *Protección especial a niños y niñas.* Los derechos a acceder a un servicio de salud que requiere un niño o una niña para conservar su vida, su dignidad, y su integridad así como para desarrollarse armónica e integralmente, está especialmente protegido; cuando una EPS obstaculiza el acceso a servicios de salud, incluidos aquellos que atienden las necesidades específicas de los menores, irrespetando gravemente su derecho a la salud.

(iii) *Concepto del médico adscrito y externo.* Por regla general, el médico que puede prescribir un servicio de salud es el médico adscrito a la EPS. El usuario puede acudir a otros médicos pero su concepto no obliga a la EPS a autorizar lo que éste prescribió, sino a remitir al usuario a un médico adscrito a la correspondiente EPS (al respecto, ver apartado 4.4.2.). Toda persona tiene derecho a que su EPS valore científicamente el concepto de un médico reconocido y vinculado al Sistema de Salud que considera que la persona requiere un servicio de salud. Este médico es el médico adscrito a la EPS y a él debe acudir el interesado. No obstante, en el evento excepcional de que el interesado acuda a un médico externo – no adscrito a la red de prestadores de la correspondiente EPS– la EPS tiene una carga de valoración del concepto de dicho médico. El concepto del médico externo no podrá ser automáticamente descartado por la EPS, sino que es necesario una valoración de su idoneidad por parte de un médico adscrito a la EPS (de manera directa o mediante remisión del interesado) o del Comité Técnico Científico, según lo determine la propia EPS.

(iv) *Acceso sin obstáculos por pagos.* ‘Los pagos moderadores no pueden constituir barreras al acceso a los servicios de salud para las personas que no tienen la capacidad económica de soportar el pago del mismo’.

(v) *Acceso al diagnóstico.* Toda persona tiene derecho a acceder a las pruebas y exámenes diagnósticos indispensables para determinar si requiere o no un servicio de salud.

(vi) *Allanamiento a la mora.* Cuando una EPS no ha hecho uso de los diferentes mecanismos de cobro que se encuentran a su alcance para lograr el pago de los aportes atrasados, se allana a la mora y, por ende, no puede fundamentar el no reconocimiento de una incapacidad laboral en la falta de pago o en la cancelación extemporánea de las cotizaciones.

(vii) *Protección a las enfermedades catastróficas y de alto costo.* El acceso a los servicios de salud oportunos es especialmente garantizado cuando se trata de una persona con una enfermedad catastrófica o de alto costo; no se les puede dejar de atender ‘bajo ningún pretexto’, ni pueden cobrarsele copagos.

(viii) *Acceso con continuidad a la salud.* El acceso a un servicio de salud

debe ser continuo, no puede ser interrumpido súbitamente; irrespetar el derecho a la salud una EPS que suspende un servicio de salud que se requiere, antes de que éste haya sido efectivamente asumido por otro prestador.

(ix) *Información, acompañamiento y seguimiento.* Toda persona tiene derecho a que las EPS o autoridades públicas no obligadas a autorizar el servicio de salud pedido, adopten las medidas adecuadas para, por lo menos, (1) suministrar la *información* que requería para saber cómo funciona el sistema de salud y cuáles son sus derechos, (2) *indicar* específicamente cuál era la institución prestadora de servicios de salud que tiene la obligación de realizar las pruebas diagnósticas que *requiere* y una cita con un especialista, y (3) la *acompañar* durante el proceso de solicitud del servicio, con el fin de asegurar el goce efectivo de sus derechos.

(x) *Prohibición de trasladarle a los usuarios cargas administrativas y burocráticas que le corresponde asumir a la EPS.* Toda persona tiene derecho a acceder a los servicios de salud sin que las EPS puedan imponer como requisito de acceso a un servicio de salud el cumplimiento de cargas administrativas propias de la entidad. En especial, toda persona tiene derecho a que su EPS autorice y tramite internamente los servicios de salud ordenados por su médico tratante; una EPS irrespetar el derecho a la salud de una persona cuando le obstaculiza el acceso al servicio, con base en el argumento de que la persona no ha presentado la solicitud al Comité Técnico Científico. El médico tratante tiene la carga de iniciar dicho trámite.

(xi) *Acceso a los servicios de acuerdo al principio de integralidad.* Toda persona tiene derecho a acceder integralmente a los servicios de salud que requiera. En tal sentido, toda persona tiene derecho, entre otras cosas, a que se remuevan las barreras y obstáculos que impidan a una persona acceder integralmente a los servicios de salud que *requiere con necesidad*, como ocurre por ejemplo, cuando el acceso implica el desplazamiento a un lugar distinto al de residencia, debido a que en su territorio no existen instituciones en capacidad de prestarlo, y la persona no puede asumir los costos de dicho traslado. En el mismo sentido, las inclusiones y exclusiones del POS deben ser interpretadas conforme a un criterio finalista, relacionado con la recuperación de la salud del interesado y el principio de integralidad.

(xii) *Libertad de elección de EPS.* Toda persona tiene derecho a elegir la EPS que se encargará de garantizarle la prestación de los servicios de salud, con las limitaciones razonables que imponga la regulación. La limitación superior impuesta a la libertad de escogencia dentro del Sistema de Salud a las personas afiliadas que se encuentren sometidas a servicios de alto costo podrá ser aplicada si (1) el ‘afiliado’ (2) está ‘*haciendo uso de servicios*’ (3) para atender ‘*procedimientos de alto*

*costo*' (4) '*sujetos a períodos mínimos de cotización*'. No puede extenderse la limitación mediante interpretaciones extensivas, como por ejemplo, impedirle a un '*afiliado*' trasladarse a una entidad porque su hijo menor, un '*beneficiario*', tiene una enfermedad de alto costo.

8.1.1. En el expediente T-1281247, la Sala decide que Salud Colpatria EPS irrespetó el derecho a la salud de Alex Mauricio Duque Osorio al haberle impuesto barreras al acceso al servicio que *requería con necesidad* (*–implante coclear–*). La Sala, reiterando las reglas (i), (ii) y (iii) citadas, resolverá revocar la decisión de instancia y tutelar el derecho a la salud del menor.

Al juez de tutela le corresponde decidir si la entidad violó o no los derechos invocados, y en caso tal, es su deber tutelar el derecho. Ahora bien, si la entidad encargada ya cumplió con sus obligaciones, al establecer cuál es la orden específica que se debe impartir para garantizar el acceso a los servicios, lo que procede es declarar la carencia de objeto, por tratarse de un hecho superado. Es importante que en estos casos, además de declarar la carencia de objeto, el juez reconozca la violación del derecho y lo tutele. De esta forma queda constancia de la violación, así no se imparta ninguna orden. En el presente caso, como se trata de una situación que había sido superada antes de que el proceso llegara a Revisión, se declarará la carencia de objeto y no se impartirá orden alguna en el caso concreto.

8.1.2. En el expediente T-1289660, la Sala decide que SaludCoop EPS irrespetó el derecho a la salud de Marlene Betancourt Mosquera al negarse a autorizar un servicio que requería (*un examen diagnóstico*) con necesidad (*no podía asumir el costo del pago moderador que se le exigía previamente*). La Sala, reiterando las reglas (iv) y (v) citadas, resolverá confirmar las órdenes impartidas en las medidas cautelares adoptadas dentro del proceso, en virtud de las cuales la EPS garantizó el acceso de la accionante al servicio requerido por ella. En la medida en que se trata de un servicio que está incluido dentro del POS, no se pronuncia la Sala sobre el recobro del mismo, en tanto no hay lugar al mismo.

8.1.3. En el expediente T-1308199, la Sala decide que el Instituto de Seguros Sociales, Seccional Cesar, irrespetó el derecho a la salud de Máximo Daniel Cuello Urzola, al no reconocer el servicio que requería para conservar su mínimo vital (incapacidades laborales), por no haber cancelado los aportes mensuales correspondientes a tiempo, teniendo en cuenta que las demoras fueron mínimas y no fueron objeto de reproche alguno por parte de la entidad acusada. La Sala, de acuerdo con las reglas (vi) y (vii) citadas, y teniendo en cuenta que la prestación del servicio se le garantizó al accionante, se limitará a confirmar la orden dispuesta en la medida cautelar adoptada dentro del proceso de la referencia, mediante la cual se garantizó el pago de las incapacidades.

8.1.4. En el expediente T-1310408, la Sala decide que Famisanar EPS irrespetó el derecho a la salud de Angélica María Rojas Castrillón, por haberse

negado a autorizar un servicio de salud que ella alega que requiere con necesidad, con base en los argumentos de que se trata de un servicio que no está incluido en el POS y que no se ha determinado claramente si el servicio se *requiere*, en razón a que el concepto no era de su médico tratante sino de un médico externo. La Sala, reiterando las reglas (i), (iii) y (v) citadas, resolverá revocar el fallo de instancia y, en su lugar, tutelaré el derecho a la salud de la accionante. Adicionalmente, confirmará la medida cautelar dispuesta dentro del proceso, en virtud de la cual se garantizó el acceso a la valoración de su salud, y a la práctica del servicio en cuestión en caso de determinarse que éste era requerido. Teniendo en cuenta que el servicio sí se encuentra en el POS la Sala no reconocerá derecho a recobro por parte de la EPS.

8.1.5. En el expediente T-1315769, la Sala decide que Comfenalco EPS irrespetó el derecho a la salud de *Eduardo*, quien sufre una enfermedad de alto costo, al negarse a autorizar un servicio médico que se requiere, por cuanto el accionante perdió la condición de afiliado y por cuanto no canceló el copago correspondiente. La Sala, reiterando las reglas (vii), (viii) citadas, resolverá revocar el fallo de instancia, tutelaré el derecho a la salud del accionante y se dejará en firme las medidas cautelares orientadas a garantizar el acceso a los servicios de salud que requiera el accionante. En la medida de que se trataba de servicios contemplados dentro del POS, no reconoce la Sala derecho de recobro por el pago de los mismos.

8.1.6. En el expediente T-1320406, la Sala decide que el DADIS irrespetó el derecho a la salud de Yoice Dalila Rueda Castilla, al haber negado el acceso a los servicios de salud que ella requiere (*mamoplastia*), a pesar de que ella es una niña tan sólo vinculada al Sistema. La Sala reitera las reglas (i), (ii) y (ix) citadas, y, en consecuencia, resolverá revocar el fallo de instancia, tutelar el derecho a la salud de la hija de la accionante y confirmar las medidas cautelares ordenadas dentro de este caso, que garantizaron el goce efectivo del derecho.

8.1.7. En el expediente T-1328235, la Sala decide que Colmédica EPS irrespetó el derecho a la salud de la accionante, por cuanto no se le garantizó el acceso a un servicio que *requería* y no estaba incluido dentro del plan obligatorio de servicios, justificando esta negativa, en el propio incumplimiento por parte de las entidades del sistema puesto que la carga de solicitar la autorización al Comité Técnico Científico es del médico tratante, no del usuario. La Sala, reiterando las reglas (i) y (x) citadas, resolverá revocar la decisión de instancia y, en la medida que la Sala ya tuvo noticia de que la prestación del servicio se le garantizó al accionante, se limitará a confirmar la orden dispuesta en la medida cautelar adoptada dentro del proceso de la referencia, que ordenaba suministrar el medicamento requerido. En este caso, se reconocerá a la EPS el derecho de recobro ante el Fosyga al que tiene derecho, en los términos que señale la reglamentación.

8.1.8. En el expediente T-1335279, la Sala decide que el DADIS irrespetó el derecho de Jessica Marín Peluffo, al no haberle *informado, indicado* y

*acompañado* en el proceso de acceder al servicio de salud requerido, a través de las instituciones prestadoras de salud encargadas de hacerlo. La Sala, reiterando las reglas (i), (v) y (ix) citadas, resolverá revocar la sentencia de instancia, tutelar el derecho a la salud, y confirmar y dejar en firme la medida cautelar que se dispuso dentro del proceso a la entidad acusada *informar, indicar y acompañar* a la beneficiaria de la acción.

8.1.9. En el expediente T-1337845, la Sala decide que ECOOPSOS *irrespetó* el derecho a la salud de Olga Patricia Palacio Villa, al negarse al no autorizar el examen de *resonancia magnética de la columna* que requiere. La Sala, reiterando las reglas (i), (v), (viii), y (x) citadas, resolverá se revocar la sentencia de instancia, tutelar el derecho a la salud de la accionante y, teniendo en cuenta que se trata de una situación que ya fue superada, se limitará a confirmar y dejar en firme las órdenes adoptadas mediante las medidas cautelares adoptadas dentro del proceso, orientadas a garantizar el acceso al servicio a la accionante.

8.1.10. En el expediente, T-1338650, la Sala decide que la Secretaría de Salud del Departamento del Cesar *irrespetó* el derecho a la salud del accionante, al no brindarle los medios necesarios para poder permanecer en el lugar, distinto a su residencia, en el que está recibiendo un servicio de salud que requiere. La Sala, reiterando las reglas (i) y (xi) citadas, resolverá revocar la sentencia de instancia, tutelar el derecho a la salud del accionante y, en consecuencia, confirmar y dejar en firme la orden dispuesta como medida cautelar, que aseguró el acceso efectivo al servicio de salud requerido.

8.1.11. En el expediente T-1350500, la Sala decide que Coomeva EPS viola el derecho a la salud de una persona cuando se niega a afiliarla, en virtud de que interpreta de manera extensiva una limitación a la libertad de escogencia de la entidad de salud mediante la cual está afiliada al Sistema. La Sala, reiterando la regla (xii) citada, resolverá revocar la sentencia de instancia, tutelar el derecho a la salud del accionante y de su grupo familiar, pero no impartirá orden alguna contra Coomeva EPS, por cuanto la libertad de escoger esa entidad de salud ya fue garantizada, en cumplimiento de la orden dispuesta mediante medida cautelar. La Sala se limitará entonces, a confirmar y dejar en firme la orden impartida.

8.1.12. En el expediente T-1645295, la Sala decide que el Consejo Superior de la Judicatura no violó el derecho de petición de Sanitas EPS, al responder que no es competente para indicar a los jueces cómo han de entender un trámite procedimental, cuando los jueces son autónomos para tomar esas decisiones. En consecuencia, la Sala reiterará la decisión de instancia que negó la tutela a la entidad accionante.

8.1.13. En el expediente T-1646086, la Sala decide que el Ministerio de la Protección Social violó el derecho de petición de Sanitas EPS, y consecuentemente el derecho a la salud de los afiliados y beneficiarios de la entidad, al limitarse a señalar que no es competente para clarificar uno de los

trámites de un procedimiento que el propio Ministerio expidió. Las entidades encargadas de garantizar la prestación de los servicios de salud tienen el derecho a que sus peticiones sean respondidas de fondo y con congruencia por los órganos del Estado del sector de la salud, en especial, si éstas van encaminadas a que se adopten medidas que permitan el eficiente, eficaz y efectivo flujo de los recursos del Sistema de Salud. La Sala reitera en este caso que *“es violatorio del derecho fundamental de petición que una autoridad pública se niegue a recibir, tramitar y dar respuesta de fondo a una petición”* y que *“el núcleo esencial de derecho de petición reside en una respuesta pronta y oportuna de la cuestión. “Los requisitos de la respuesta son tres, (1) la oportunidad, (2) resolver (i) de fondo, (ii) clara, (iii) precisa y (iv) de manera congruente lo solicitado; (3) ser puesta en conocimiento del peticionario” (ver sección 5.8.).* La Sala revocará la decisión de instancia, tutelaré el derecho de la entidad accionante y, en consecuencia, ordenará al Ministerio de la Protección Social que responda de fondo la petición que le fue presentada.

8.1.14. En los expedientes T-1855547, T-1858995, T-1858999, T-1859088, T-1862038, T-1862046, T-1866944, T-1867317, y T-1867326, reiterando las reglas (i) y (xii) citadas, resolveré confirmar las decisiones de instancia en cuanto a la orden a la EPS de garantizar el suministro del lente intraocular, pero revocando las órdenes de recobro al Fosyga, pues al entender incluido en el POS el lente intraocular desaparece la justificación para ordenar el reembolso de su costo. En todo caso, en tanto se comprobó la presencia de una falla en la regulación –dudas acerca de los contenidos del POS y ausencia de reglas que permitan definir en los casos concretos qué se encuentra incluido y qué no–, hasta tanto las autoridades de regulación competentes no adopten las medidas necesarias para corregir los problemas detectados, se deberán aplicar de forma prevalente los parámetros previstos en la respectiva jurisprudencia constitucional.

## **8.2. Resumen de las órdenes con relación a los problemas jurídicos generales**

De acuerdo con la jurisprudencia constitucional sobre el alcance de las obligaciones de protección derivadas del derecho fundamental a la salud (ver capítulo 6), las autoridades competentes para adoptar medidas de regulación en salud, deberán cumplir con las siguientes órdenes atinentes a las fallas en la regulación.

8.2.1. En lo que respecta a los planes de beneficios, se impartirán ocho órdenes. A saber, (1) ordenar que se precise el contenido de los planes (numeral décimo sexto de la parte resolutive); (2) ordenar que se actualice integralmente el POS y se reduzcan las dudas (décimo séptimo); (3) ordenar que se actualice periódicamente POS (décimo octavo); (4) ordenar que se presente un informe sobre deficiencias en el suministro de lo que sí está incluido en el POS (décimo noveno); (5) ordenar que se informe las EPS que más vulneran el derecho a la salud (vigésimo); (6) ordenar que se unifique el

POS de los menores de edad (vigésimo primero); (7) ordenar que se adopte un programa y un cronograma para unificar el POS en el caso de las demás personas (vigésimo segundo); y (8) ordenar que se amplíe la competencia del Comité Técnico Científico, CTC, para que pueda autorizar servicios médicos diferentes a medicamentos, hasta tanto se diseñe un ‘mecanismo’ diferente (vigésimo tercero).

8.2.2. En cuanto al flujo de recursos para financiar los servicios de salud, se resolverá impartir cuatro órdenes. (1) Orden para que se asegure el flujo de recursos en el Sistema General de Seguridad Social en Salud, SGSSS (vigésimo cuarto); (2) orden para que no se exija copia de ejecutoria de la sentencia para autorizar el servicio o el reembolso al que haya lugar (vigésimo quinto); (3) orden para que se diseñe un plan de contingencia para pagar los recobros atrasados (vigésimo sexto); y (4) orden para corregir o rediseñar el sistema de recobro sea eficiente (vigésimo séptimo);

Adicionalmente, para superar otras fallas en el Sistema de protección, se resolverá impartir dos órdenes. (1) Ordenar que se proporcione a los usuarios del sistema información que les permita ejercer su libertad de escogencia (vigésimo octavo); y (2) ordenar que se cumpla la meta de cobertura universal (vigésimo noveno).

## **9. La reducción de la presentación de acciones de tutela para acceder a los servicios de salud como indicador del cumplimiento de esta sentencia**

Como se vio en el apartado 6 de esta sentencia, durante más de una década las personas han tenido que acudir a la acción de tutela para que la justicia resuelva controversias que habrían podido ser dirimidas de manera general por los órganos competentes de regulación. Este fenómeno constituye un claro indicio acerca de las fallas en la regulación del sistema de salud, lo cual a su vez es el fundamento de las órdenes generales atinentes a corregir dichos problemas. Por esta razón, las decisiones que adopten los órganos de regulación encaminados a cumplir la presente sentencia deben necesariamente conducir a un resultado que facilite el acceso de las personas a los servicios de salud y que eventualmente disminuya la proporción de tutelas presentadas para ello.

Si bien las autoridades del sector de la salud tienen plena autonomía para diseñar los indicadores de gestión, de resultado o de otra índole para evaluar las políticas públicas en el ámbito de la salud – como lo ha establecido el artículo 2° de la Ley 1122 de 2007– dichos indicadores no están específicamente dirigidos a medir si las personas se han visto o no obligadas a acudir a la acción de tutela para gozar de manera efectiva de su derecho fundamental a la salud. Tales indicadores son de enorme trascendencia y significación para verificar si los objetivos de la política pública en materia de salud se están logrando y si los medios diseñados para alcanzarlos son idóneos. Sin embargo, no son suficientes para demostrar que se están cumpliendo las órdenes atinentes a las fallas en la regulación impartidas en

esta sentencia.

Sin duda, adoptar las regulaciones que suplan los vacíos constatados en esta providencia es un paso indispensable para cumplir lo ordenado. No obstante, desde el punto de vista de los usuarios del sistema de salud, lo esencial es que tales regulaciones remuevan los obstáculos para acceder a los servicios de salud, supriman los desincentivos que han conducido a los graves problemas analizados en esta sentencia y, en general, establezcan un marco de reglas de juego en las cuales los titulares del derecho a la salud puedan gozar de éste de manera oportuna, continua, eficaz. Ello significa que con el tiempo dejará de ser necesaria la interposición de tutelas como parte de un trámite adicional para acceder libre y autónomamente a un servicio de salud oportuno de calidad y eficiente.

Así, la reducción del número de acciones de tutela invocadas para que sean los jueces los que resuelvan los problemas jurídicos recurrentes de acceso a los servicios de salud analizados en esta sentencia, es uno de los resultados que pueden indicar el cumplimiento de las órdenes de esta sentencia atinentes a las fallas en la regulación. Por esta razón, sin perjuicio de la autonomía de las autoridades del sector para diseñar y aplicar los indicadores que a su juicio sean más adecuados, la Corte ordenará al Ministerio de Protección Social que informe a esta Sala, así como a la Procuraduría General de la Nación y a la Defensoría del Pueblo, sobre el número de acciones de tutela interpuestas con el fin de proteger el derecho a la salud, específicamente acerca en lo concerniente a los problemas jurídicos descritos en la presente providencia. Con el tiempo, si las medidas que adopten los órganos de regulación son idóneas, las personas no se verán obligadas a acudir a la acción de tutela y la proporción de ésta se reducirá.

Con todo, advierte la Sala que el informe sobre el número de tutelas, debe ser analizado a la luz de los demás indicadores sobre salud que se encuentran establecidos en las normas legales y que deben ser elaborados desde la perspectiva del ‘goce efectivo del derecho’ a la salud –*indicadores GED de salud*–. El número de tutelas que resuelven los problemas jurídicos de esta sentencia, no constituye una medición completa, ni mucho menos específica, del goce efectivo del derecho a la salud, y tampoco, de los fenómenos y causas subyacentes al sistema, que permiten o impiden una prestación efectiva del servicio.

En el Sistema de Seguridad Social en Salud existen varios instrumentos y mecanismos dirigidos a evaluar permanentemente el funcionamiento del sistema de salud, y a divulgar los resultados de la evaluación. Los deberes relacionados con el recaudo, procesamiento y divulgación de la información, se encuentran previstos en las diferentes normas que conforman el sistema. En la Ley 100 de 1993, por ejemplo, entre las funciones del Ministerio de Protección Social, asignadas por el artículo 173, se encuentra: ‘4. *Formular y aplicar los criterios de evaluación de la eficiencia en la gestión de las Entidades Promotoras de Salud y por las Instituciones Prestadoras de*

*Servicios de Salud del Sistema General de Seguridad Social en Salud y por las direcciones seccionales, distritales y locales de salud.'*

En el artículo 199 (Ley 100 de 1993) a su vez se ordena al Ministerio la solicitud de la información necesaria para la evaluación de la calidad de los servicios y de satisfacción de los usuarios. Se dice al respecto: *'El Ministerio de Salud solicitará la información que estime necesaria con el objeto de establecer sistemas homogéneos de registro y análisis que permitan periódicamente la evaluación de la calidad del servicio y la satisfacción del usuario.'*

En esta misma línea, el artículo 227 de la Ley 100 de 1993 faculta al gobierno nacional para adoptar las normas para el sistema de control de la calidad del servicio de salud. Dice la norma: *'Es facultad del Gobierno Nacional expedir las normas relativas a la organización de un sistema obligatorio de garantía de calidad de la atención de salud, incluyendo la auditoría médica, de obligatorio desarrollo en las Entidades Promotoras de Salud, con el objeto de garantizar la adecuada calidad en la prestación de los servicios. La información producida será de conocimiento público.'*

Por ejemplo, en el desarrollo de un sistema de garantía de la calidad, en el marco del PARS, se han implementado diferentes mecanismos encaminados a mejorar el recaudo y flujo de información en el sistema.

Un aspecto importante de la disponibilidad de información sobre el funcionamiento del sistema de salud, como se dijo antes, es que se base en indicadores de goce efectivo del derecho.

Recientemente, mediante la Ley 1122 de 2007 que reformó el Sistema de Salud, el Congreso ordenó que la evaluación de los actores del sector se haga *'a través de indicadores de gestión y resultados en salud y bienestar de todos los actores que operan en el Sistema General de Seguridad Social en Salud'*. El Legislador fijó un plazo de seis meses, contado a partir de la entrada en vigencia de la ley, 9 de enero de 2007 (según fecha de publicación en el Diario Oficial) al Ministerio de la Protección Social, para que *'establezca'* los *'mecanismos'* que permitan realizar ese tipo de evaluación. Ordena también que *'como resultado de esta evaluación, podrá definir estímulos o exigir, entre otras, la firma de un convenio de cumplimiento, y si es del caso, solicitará a la Superintendencia Nacional de Salud suspender en forma cautelar la administración de los recursos públicos, hasta por un año de la respectiva entidad. Cuando las entidades municipales no cumplan con los indicadores de que trata este artículo, los departamentos asumirán su administración durante el tiempo cautelar que se defina. Cuando sean los Departamentos u otras entidades del sector de la salud, los que incumplen con los indicadores, la administración cautelar estará a cargo del Ministerio de la Protección Social o quien este designe. Si hay reincidencia, previo informe del Ministerio de la Protección Social, la Superintendencia Nacional de Salud evaluará y podrá imponer las sanciones establecidas en la ley.'* Este parámetro que debe

observar la regulación se reconoció en la jurisprudencia constitucional, al estudiar una demanda de constitucionalidad en contra de la competencia que otorga la Ley a la Comisión de Regulación en Salud para fijar tarifas para los servicios de salud, ligando el monto de la misma al lugar en el que la entidad haya sido clasificada en razón a su evaluación y a su desempeño.

Esta perspectiva de evaluación de los actores del sistema contribuye a conocer qué tanto aporta cada uno a mejorar los resultados en salud y la protección del derecho a la salud. Sin embargo, esta debe ser complementada con indicadores de goce efectivo del derecho.

En conclusión, el informe que presente el Ministerio de Protección Social sobre el impacto de las decisiones que adopte en cumplimiento de esta sentencia en la reducción del número de las acciones de tutela deberá ser elaborado a la luz de las demás obligaciones de esa entidad de elaborar indicadores para evaluar el sistema de salud, desde la perspectiva del goce efectivo del derecho.

### III. DECISIÓN

En mérito de lo expuesto, la Corte Constitucional administrando justicia en nombre del pueblo y por mandato de la Constitución,

#### RESUELVE:

**Primero.- Levantar** la suspensión de términos en los procesos de la referencia.

**Segundo.- Revocar** la sentencia del Juzgado 11 Civil del Circuito de Cali dentro del expediente T-1281247, y en su lugar, **tutelar** el derecho a la salud de Alex Mauricio Duque Osorio. Se abstiene la Sala de proferir orden alguna en contra de Salud Colpatria EPS, y **declarar la carencia de objeto**, por sustracción de materia.

**Tercero.- Revocar** la sentencia del Juzgado 5° Penal Municipal de Cali dentro del expediente T-1289660, y en su lugar, **tutelar** el derecho a la salud de Marlene Betancourt Mosquera. En consecuencia, **dejar en firme** las medidas cautelares dispuestas dentro del proceso de la referencia, mediante las cuales se aseguró a la accionante el acceso al examen diagnóstico que requería.

**Cuarto.- Revocar** la sentencia de la Sala Civil, Familia, Laboral, del Tribunal Superior de Valledupar dentro del expediente T-1308199, y en su lugar, **tutelar** el derecho a la salud de Máximo Daniel Cuello Urzola. En consecuencia, **dejar en firme** las medidas cautelares dispuestas por la Sala dentro del proceso, según las cuales el Instituto de Seguros Sociales, Seccional Cesar, debía proceder (1) a dar respuesta a las solicitudes de reconocimiento de incapacidad laboral presentadas por Máximo Daniel Cuello ante dicha

entidad —absteniéndose de negar el pago de las incapacidades laborales objeto de acción de tutela de la referencia con fundamento en que el pago de las cotizaciones se hizo extemporáneamente— y (2) a notificar personalmente dicha respuesta al accionante.

**Quinto.- Revocar** la sentencia del Juzgado Décimo Penal Municipal de Barranquilla dentro del expediente T-1310408, y en su lugar, **tutelar** el derecho a la salud de Angélica María Rojas Castrillón. En consecuencia, **dejar en firme** las medidas cautelares dispuestas por la Sala dentro del proceso, según las cuales, si Famisanar EPS aún no lo había hecho, en el término de 48 horas debía valorar interdisciplinariamente el estado de salud de la accionante —Angélica María Rojas Castrillón—, incluyendo especialistas en *ginecología* y *ortopedia*, para agotar las opciones de tratamiento de la afección de salud que la aqueja en su espalda, de acuerdo con lo dispuesto por la Médico Coordinadora de Alto Costo y Soporte Legal de Famisanar EPS. En tales medidas se dispuso también que en caso de que el tratamiento ordenado por los médicos fuera la cirugía de *mamoplastia*, se entenderá que se trata de un servicio de salud necesario, no estético, y por tanto, contemplado en el POS, y que, en cualquier caso, Famisanar EPS debía adoptar las medidas necesarias para garantizar la prestación del servicio, 48 horas después de ser ordenado por el o los médicos tratantes.

**Sexto.- Revocar** la sentencia del Juzgado 13 Civil Municipal de Medellín dentro del expediente T-1315769, y en su lugar, **tutelar** el derecho a la salud de *Eduardo*. En consecuencia, **dejar en firme** las medidas cautelares dispuestas por la Sala, mediante las cuales se ordenó a Comfenalco EPS que autorizara al accionante la práctica del examen de carga viral, recetado por su médico tratante y autorizado por esa entidad, en el evento que aún no le hubiera sido practicado. También se reitera a Comfenalco EPS que en el evento de que el accionante no estuviera accediendo a consultas médicas y exámenes de control y de diagnóstico para el adecuado seguimiento y tratamiento de la enfermedad catastrófica que lo aqueja y a los medicamentos que requiere para tal efecto, debería suministrarle estos servicios médicos (v.gr. consultas médicas, exámenes de control y de diagnóstico y medicamentos). Se reitera por último, que los medicamentos y los exámenes de control y de diagnóstico, para el adecuado seguimiento y tratamiento de la enfermedad, deberían ser formulados por un médico especialista, afiliado a Comfenalco EPS, quien tiene el deber de revisar y controlar el estado de salud del accionante.

**Séptimo.- Revocar** la sentencia del Juzgado 12 Civil Municipal de Cartagena dentro del proceso T-1320406, y en su lugar, **tutelar** el derecho a la salud de Yoice Dalila Rueda Castilla. En consecuencia, **dejar en firme** la medida cautelar que ordenó al Departamento Administrativo de Salud Distrital de Cartagena, DADIS, que si aún no lo había hecho, tomara las medidas necesarias para garantizar que se valorara el estado de salud de la menor y se determinara el tratamiento requerido por ella, considerando especialmente la necesidad de practicar una cirugía de *mamoplastia*, en la IPS que corresponda.

**Octavo.- Revocar** la sentencia del Juzgado 38 Civil Municipal de Bogotá dentro del proceso T-1328235, y en su lugar, **tutelar** el derecho a la salud de María Diva Almonacid de Martínez. En consecuencia, **dejar en firme** la orden que dispuso a Colmédica EPS en la medida cautelar, para que garantizara el acceso efectivo de la accionante al medicamento requerido, si no lo había hecho aún. Se reconoce a Colmédica EPS el derecho de recobro ante el Fosyga, por los costos que no le corresponda asumir del cumplimiento de esta orden, de acuerdo con la reglamentación.

**Noveno.- Revocar** la sentencia del Juzgado 12 Civil Municipal de Cartagena dentro del proceso T-1335279, y en su lugar, **tutelar** el derecho a la salud de Jessica Marín Peluffo. En consecuencia, se decide **dejar en firme** la medida cautelar dispuesta, mediante la cual se le ordenó que (1) suministrara a Jessica Marín Peluffo, directamente o a través de su señora madre, la *información* que requería para saber cómo funciona el sistema de salud y cuáles son sus derechos, (2) le *indicara* específicamente cuál era la institución prestadora de servicios de salud que tiene la obligación de realizar las pruebas diagnósticas *ecocardiograma doppler, electrocardiografía, frotis y cultivo de la garganta* que requiere y una cita con un especialista, y (3) la *acompañara* durante dicho proceso, con el fin de asegurar el goce efectivo de sus derechos.

**Décimo.- Revocar** la sentencia del Juzgado Primero Penal Municipal de Rionegro, dentro del proceso T-1337845 y, en su lugar, **tutelar** el derecho a la salud de Olga Patricia Palacio Villa. En consecuencia, **dejar en firme** la medida cautelar dispuesta, mediante la cual se ordenó que se garantizara la autorización del servicio de salud requerido (resonancia magnética de columna), el cual ya fue autorizado.

**Undécimo.- Revocar** la sentencia de la Sala Primera de Familia del Tribunal Superior de Medellín dentro del proceso T-1338650 y, en su lugar, **tutelar** el derecho a la salud de Mario Reyes Acevedo. En consecuencia, **dejar en firme** la medida cautelar dispuesta por la Sala, mediante la cual se ordenó a la Secretaría de Salud del Departamento del Cesar que brindara a Mario Reyes Acevedo los medios económicos suficientes o realizara acuerdos con entidades públicas o privadas de la ciudad de Medellín, para costear su traslado y manutención, con el objeto de que continuara recibiendo el tratamiento que requiere en el Hospital Universitario San Vicente de Paúl.

**Duodécimo.- Revocar** la sentencia de la Sala Octava de Decisión Civil del Tribunal Superior de Medellín dentro del Expediente T-1350500 y, en su lugar, **tutelar** el derecho a la salud de Jairo Eduardo Yepes Pérez y su grupo familiar. En consecuencia, **dejar en firme** la medida cautelar dispuesta por la Sala, mediante la cual se ordenó a Coomeva EPS que afiliara al accionante y a su grupo familiar, si aún no lo había hecho y si ese seguía siendo el deseo del accionante.

**Décimo tercero.- Confirmar** la sentencia de la Sala Civil de la Corte

Suprema de Justicia, dentro del proceso T-1645295, en la cual se negó la tutela de Sanitas EPS contra la Sala Administrativa del Consejo Superior de la Judicatura.

**Décimo cuarto.- Revocar** la sentencia de la Sala Civil de la Corte Suprema de Justicia, dentro del proceso T-1646086 y, en su lugar, **tutelar** el derecho de petición de Sanitas EPS y a la salud de sus afiliados y beneficiarios. **Ordenar** al Ministerio de la Protección Social que, en el término de 15 días contados a partir de la notificación de la presente sentencia, responda de fondo la petición que le fue presentada por Sanitas EPS, para lo cual se ha de tener en cuenta lo dispuesto en la sección (6.2.) de la parte motiva de la presente sentencia.

**Décimo quinto.- Confirmar** las decisiones proferidas por los siguientes juzgados: Juzgado Primero Penal Municipal de Tulúa, Valle (T-1855547); El Juzgado Cuarto Penal Municipal de Barranquilla, Atlántico (T-1862046); Juzgado Primero Municipal de Ibagué, Tolima (T-1866944); Juzgado Cuarto Civil Municipal de Barranquilla, Atlántico (T-1867317); Juzgado Veintitrés Civil Municipal de Cali, Valle (T-1862038); Juzgado Décimo Penal Municipal de Barranquilla, Atlántico (T-1858999); Juzgado Décimo Penal Municipal de Barranquilla, Atlántico (T-1858995); Juzgado Segundo Civil Municipal de Barranquilla, Atlántico (T-1859088); Juzgado Segundo de Familia de Medellín, Antioquia (T- 1867326) dentro de los respectivos procesos de acción de tutela, en cuanto a la protección de los derechos fundamentales de los accionantes: Carlos Cortes Cortes contra Coomeva EPS (T-1855547); Carmen Raquel Betancourt de Villalobos contra Saludcoop EPS (T- 1862046); Elvia Sánchez de Alonso contra Sanitas EPS (T-1866944); Enrieta Dolores Rodríguez Martes contra Saludcoop EPS (T-1867317); Alba Isabel Pinto de Monroy contra Saludcoop EPS (T-1862038); Alfonso Carmelo Villamil Fernández contra Salud total EPS (T-1858999); Enrique del Carmen Martínez Muñoz contra Saludcoop EPS (T-1858995); Mery Restrepo de Zuluaga contra Cafesalud EPS (T-1859088); Rosario Hincapié Salazar contra Saludvida EPS (T- 1867326).

Así mismo **revocar** las órdenes, proferidas en los mismos procesos, de recobrar ante el Fosyga por los costos de los procedimientos.

**Décimo sexto.- Ordenar** al Ministerio de la Protección Social, a la Comisión de Regulación en Salud y al Consejo Nacional de Seguridad Social en Salud, adoptar las medidas necesarias, de acuerdo con sus competencias, para superar las fallas de regulación en los planes de beneficios asegurando que sus contenidos (i) sean precisados de manera clara, (ii) sean actualizados integralmente, (iii) sean unificados para los regímenes contributivo y subsidiado y, (iv) sean oportuna y efectivamente suministrados por las Entidades Promotoras de Salud.

Esta regulación también deberá (i) incentivar que las EPS y las entidades territoriales garanticen a las personas el acceso a los servicios de salud a los cuales tienen derecho; y (ii) desincentivar la denegación de los servicios de

salud por parte de las EPS y de las entidades territoriales.

Para dar cumplimiento a esta orden, se adoptarán por lo menos las medidas relacionadas en los numerales décimo séptimo a vigésimo tercero.

**Décimo séptimo.- Ordenar** a la Comisión Nacional de Regulación en Salud la actualización integral de los Planes Obligatorios de Salud (POS). Para el cumplimiento de esta orden la Comisión deberá garantizar la participación directa y efectiva de la comunidad médica y de los usuarios del sistema de salud, según lo indicado en el apartado (6.1.1.2.). En dicha revisión integral deberá: (i) definir con claridad cuáles son los servicios de salud que se encuentran incluidos dentro de los planes de beneficios, valorando los criterios de ley así como la jurisprudencia de la Corte Constitucional; (ii) establecer cuáles son los servicios que están excluidos así como aquellos que no se encuentran comprendidos en los planes de beneficios pero que van a ser incluidos gradualmente, indicando cuáles son las metas para la ampliación y las fechas en las que serán cumplidas; (iii) decidir qué servicios pasan a ser suprimidos de los planes de beneficios, indicando las razones específicas por las cuales se toma dicha decisión, en aras de una mayor protección de los derechos, según las prioridades en materia de salud; y (iv) tener en cuenta, para las decisiones de incluir o excluir un servicio de salud, la sostenibilidad del sistema de salud así como la financiación del plan de beneficios por la UPC y las demás fuentes de financiación.

En la definición de los contenidos del POS deberá respetarse el principio de integralidad en función de los servicios de salud ordenados y de la atención requerida para las patologías aseguradas.

Los nuevos planes de beneficios de acuerdo a lo señalado antes deberán adoptarse antes de febrero uno (1) de 2009. Antes de esa fecha los planes serán remitidos a la Corte Constitucional y serán comunicados a todas las entidades Promotoras de Salud para que sea aplicado por todos los Comités Técnico Científicos de las EPS. Este plazo podrá ampliarse si la Comisión de Regulación en Salud, CRES, expone razones imperiosas que le impidan cumplir con esta fecha, la cual, en ningún caso podrá ser superior a agosto 1 de 2009.

En caso de que la Comisión de Regulación en Salud no se encuentre integrada el 1° de noviembre de 2008, el cumplimiento de esta orden corresponderá al Consejo Nacional de Seguridad Social en Salud, el cual deberá garantizar también la participación directa de la comunidad médica y de los usuarios.

**Décimo octavo.- Ordenar** a la Comisión de Regulación en Salud la actualización de los Planes Obligatorios de Salud por lo menos una vez al año, con base en los criterios establecidos en la ley. La Comisión presentará un informe anual a la Defensoría del Pueblo y a la Procuraduría General de la Nación indicando, para el respectivo período, (i) qué se incluyó, (ii) qué no se incluyó de lo solicitado por la comunidad médica y los usuarios, (iii) cuáles

servicios fueron agregados o suprimidos de los planes de beneficios, indicando las razones específicas sobre cada servicio o enfermedad, y (iv) la justificación de la decisión en cada caso, con las razones médicas, de salud pública y de sostenibilidad financiera.

En caso de que la Comisión de Regulación en Salud no se encuentre integrada el 1° de noviembre de 2008, el cumplimiento de esta orden corresponderá al Consejo Nacional de Seguridad Social en Salud. Cuando sea creada la Comisión de Regulación ésta deberá asumir el cumplimiento de esta orden y deberá informar a la Corte Constitucional el mecanismo adoptado para la transición entre ambas entidades.

**Décimo noveno.- Ordenar** al Ministerio de la Protección Social que adopte medidas para garantizar que todas las Entidades Promotoras de Salud habilitadas en el país envíen a la Comisión de Regulación en Salud, a la Superintendencia Nacional de Salud y a la Defensoría del Pueblo, un informe trimestral en el que se indique: (i) los servicios médicos ordenados por el médico tratante a sus usuarios que sean negados por la Entidad Promotora de Salud y que no sean tramitados por el Comité Técnico Científico, (ii) los servicios médicos ordenados por el médico tratante a sus usuarios que sean negados por el Comité Técnico Científico de cada entidad; (iii) indicando en cada caso las razones de la negativa, y, en el primero, indicando además las razones por las cuáles no fue objeto de decisión por el Comité Técnico Científico.

El primer informe deberá ser enviado el 1 de febrero de 2009. Copia del mismo deberá ser remitida a la Corte Constitucional antes de la misma fecha.

**Vigésimo.- Ordenar** al Ministerio de la Protección Social y a la Superintendencia Nacional de Salud que adopten las medidas para identificar las Entidades Promotoras de Salud y las Instituciones Prestadoras de Servicios que con mayor frecuencia se niegan a autorizar oportunamente servicios de salud incluidos en el POS o que se *requieran con necesidad*. Con este fin, el Ministerio y la Superintendencia deberán informar a la Defensoría del Pueblo, a la Procuraduría General de la Nación y a la Corte Constitucional (i) cuáles son las Entidades Promotoras de Salud y las Instituciones Prestadoras de Servicios que con mayor frecuencia incurren en prácticas violatorias del derecho a la salud de las personas; (ii) cuáles son las medidas concretas y específicas con relación a éstas entidades que se adoptaron en el pasado y las que se adelantan actualmente, en caso de haberlas adoptado; y (iii) cuáles son las medidas concretas y específicas que se han tomado para garantizar el goce efectivo del derecho a la salud, de las personas que se encuentran afiliadas a las Entidades Promotoras de Salud y las Instituciones Prestadoras de Servicios identificadas.

El informe a cargo de la Superintendencia y el Ministerio deberá ser presentado antes de octubre 31 de 2008.

**Vigésimo primero.- Ordenar** a la Comisión de Regulación en Salud unificar los planes de beneficios para los niños y las niñas del régimen contributivo y del subsidiado, medida que deberá adoptarse antes del 1 de octubre de 2009 y deberá tener en cuenta los ajustes necesarios a la UPC subsidiada de los niños y las niñas para garantizar la financiación de la ampliación en la cobertura. En caso de que para esa fecha no se hayan adoptado las medidas necesarias para la unificación del plan de beneficios de los niños y las niñas, se entenderá que el plan obligatorio de salud del régimen contributivo cubre a los niños y las niñas del régimen contributivo y del régimen subsidiado.

Un informe sobre el proceso de cumplimiento de esta orden deberá ser remitido a la Corte Constitucional antes del 15 de marzo de 2009 y comunicado al Instituto Colombiano de Bienestar Familiar y a la Defensoría del Pueblo.

En caso de que la Comisión de Regulación en Salud no se encuentre integrada para el 1° de noviembre de 2008, el cumplimiento de esta orden corresponderá al Consejo Nacional de Seguridad Social en Salud.

**Vigésimo segundo.- Ordenar** a la Comisión de Regulación en Salud que adopte un programa y un cronograma para la unificación gradual y sostenible de los planes de beneficios del régimen contributivo y del régimen subsidiado teniendo en cuenta: (i) las prioridades de la población según estudios epidemiológicos, (ii) la sostenibilidad financiera de la ampliación de la cobertura y su financiación por la UPC y las demás fuentes de financiación previstas por el sistema vigente.

El programa de unificación deberá adicionalmente (i) prever la definición de mecanismos para racionalizar el acceso a los servicios de salud por parte de los usuarios, asegurando que las necesidades y las prioridades en salud sean atendidas y sin que se impida el acceso a servicios de salud requeridos e, (ii) identificar los desestímulos para el pago de cotizaciones por parte de los usuarios y (iii) prever la adopción de las medidas necesarias para estimular que quienes tienen capacidad económica, efectivamente coticen, y que a quienes pasen del régimen subsidiado al régimen contributivo se les garantice que pueden regresar al subsidiado de manera ágil cuando su ingreso disminuya o su situación socioeconómica se deteriore.

La Comisión de Regulación en Salud deberá remitir a la Corte Constitucional, antes del 1 de febrero de 2009, el programa y el cronograma para la unificación de los planes de beneficios, el cual deberá incluir: (i) un programa; (ii) un cronograma; (iii) metas medibles; (iv) mecanismos para el seguimiento del avance y (v) la justificación de por qué se presentó una regresión o un estancamiento en la ampliación del alcance del derecho a la salud. Copia de dicho informe deberá ser presentada a la Defensoría del Pueblo en dicha fecha y, luego, deberá presentar informes de avance en el cumplimiento del programa y el cronograma cada semestre, a partir de la fecha indicada.

En la ejecución del programa y el cronograma para la unificación de los planes de beneficios, la Comisión ofrecerá oportunidades suficientes de participación directa y efectiva a las organizaciones que representen los intereses de los usuarios del sistema de salud y de la comunidad médica. En caso de que la Comisión de Regulación en Salud no se encuentre integrada para el 1 de noviembre de 2008, el cumplimiento de esta orden corresponderá al Consejo Nacional de Seguridad Social en Salud.

**Vigésimo tercero.- Ordenar** a la Comisión de Regulación en Salud que adopte las medidas necesarias para regular el trámite interno que debe adelantar el médico tratante para que la respectiva EPS autorice directamente tanto los servicios de salud no incluidos en el plan obligatorio de salud (contributivo o subsidiado), diferente a un medicamento, como los medicamentos para la atención de las actividades, procedimientos e intervenciones explícitamente excluidas del Plan Obligatorio de Salud, cuando estas sean ordenados por el médico tratante.

Hasta tanto éste trámite interno de las EPS no sea regulado de manera definitiva, se ordena al Ministerio de la Protección Social y a la Comisión de Regulación en Salud –y mientras este es creado al Consejo Nacional de Seguridad Social en Salud– que adopten las medidas necesarias para garantizar que se ordene a las entidades promotoras de salud, EPS, extender las reglas vigentes para someter a consideración del Comité Técnico Científico de la entidad la aprobación de un medicamento no incluido en el POS, a las solicitudes de aprobación de los servicios de salud no incluidos en el plan obligatorio de salud, distintos a medicamentos, tales como actividades, procedimientos e intervenciones explícitamente excluidas del Plan Obligatorio de Salud, cuando éstos sean ordenados por el médico tratante, teniendo en cuenta los parámetros fijados por la Corte Constitucional. Esta orden deberá ser cumplida dentro de los cinco (5) días siguientes a la notificación de la presente sentencia.

Cuando el Comité Técnico Científico niegue un servicio médico, de acuerdo con la competencia de que trata la presente orden, y posteriormente se obligue a su prestación mediante una acción de tutela, sólo procederá el reembolso de la mitad de los costos no cubiertos, de acuerdo con lo dicho en esta providencia.

El Ministerio de la Protección Social deberá presentar, antes de marzo 15 de 2009, un informe sobre el cumplimiento de esta orden a la Superintendencia Nacional de Salud y a la Defensoría del Pueblo, con copia a la Corte Constitucional.

**Vigésimo cuarto.- Ordenar** al Ministerio de la Protección Social y al administrador fiduciario del Fosyga que adopten medidas para garantizar que el procedimiento de recobro por parte de las Entidades Promotoras de Salud ante el Fosyga, así como ante las entidades territoriales respectivas, sea ágil y

asegure el flujo oportuno y suficiente de recursos al sistema de salud para financiar los servicios de salud, tanto en el evento de que la solicitud se origine en una tutela como cuando se origine en una autorización del Comité Técnico Científico.

Para dar cumplimiento a esta orden, se adoptarán por lo menos las medidas contenidas en los numerales vigésimo quinto a vigésimo séptimo de esta parte resolutive.

**Vigésimo quinto.- Ordenar** al administrador fiduciario del Fosyga que, a partir de la notificación de la presente sentencia, cuando se trate de servicios de salud cuya práctica se autorizó en cumplimiento de una acción de tutela: (i) la entidad promotora de salud podrá iniciar el proceso de recobro una vez la orden se encuentre en firme, bien sea porque la sentencia de instancia no fue impugnada, bien sea porque se trata de la sentencia de segunda instancia, sin que el procedimiento de autorización del servicio de salud o de recobro pueda ser obstaculizado con base en el pretexto del eventual proceso de revisión que se puede surtir ante la Corte Constitucional; (ii) no se podrá establecer como condición para reconocer el derecho al recobro de los costos que la entidad no estaba legal ni reglamentariamente obligada a asumir que en la parte resolutive del fallo de tutela se autorice el recobro ante el Fosyga, o la correspondiente entidad territorial. Bastará con que en efecto se constate que la EPS no se encuentra legal ni reglamentariamente obligada a asumirlo de acuerdo con el ámbito del correspondiente plan de beneficios financiado por la UPC. Y (iii) en el reembolso se tendrá en cuenta la diferencia entre medicamentos de denominación genérica y medicamentos de denominación de marca, sin que pueda negarse el reembolso con base en la glosa ‘Principio activo en POS’ cuando el medicamento de marca sea formulado bajo las condiciones señaladas en el apartado (6.2.1.) de esta providencia.

El Ministerio de Protección Social y el administrador fiduciario del Fosyga deberán presentar un informe sobre el cumplimiento de esta orden antes del 15 de noviembre de 2008 ante la Corte Constitucional.

**Vigésimo sexto.- Ordenar** al Ministerio de la Protección Social y al Administrador fiduciario del Fosyga que, si aún no lo han hecho, diseñen un plan de contingencia para (1) adelantar el trámite de las solicitudes de recobro que están atrasadas y (2) agilizar los pagos de las solicitudes de recobro en las que se verificó el cumplimiento de los requisitos de las resoluciones vigentes, pero que aún no han sido pagadas, de acuerdo con lo señalado en esta providencia. Este plan deberá contener al menos: (i) metas específicas para el cumplimiento de la presente orden, (ii) un cronograma para el cumplimiento de las metas y (iii) las acciones que se llevarán a cabo para el cumplimiento de las metas, especificando en cada caso el funcionario responsable de su cumplimiento.

El Plan deberá ser presentado, antes del 15 de noviembre de 2008 ante el Comité de Verificación creado por el Consejo de Estado y ante la Corte

Constitucional y deberá ser ejecutado en su totalidad antes de marzo 15 de 2009. En caso de que en esta fecha (15 de marzo de 2009) no se haya efectuado el reembolso de al menos el 50% de las solicitudes de recobro que están atrasadas en el trámite a 31 de septiembre de 2008, independiente de las glosas que tengan, operará un mecanismo de compensación general para dicho 50%. El 50% restante deberá haber sido cancelado en su totalidad antes del primero (1°) de julio de 2009. En caso de que posteriormente se verifique que el Fosyga no estaba obligado a realizar determinados reembolsos, deberá adoptar las medidas para compensar esos recursos, con la correspondiente EPS.

El Ministerio de Protección Social y el administrador del Fosyga, presentarán un informe sobre la ejecución del Plan de Contingencia cada dos meses al Comité de Verificación.

**Vigésimo séptimo.– Ordenar** al Ministerio de Protección Social que tome las medidas necesarias para que el sistema de verificación, control y pago de las solicitudes de recobro funcione de manera eficiente, y que el Fosyga desembolse prontamente los dineros concernientes a las solicitudes de recobro. El Ministerio de Protección Social podrá definir el tipo de medidas necesarias.

El Ministerio de Protección Social también podrá rediseñar el sistema de recobro de la manera que considere más adecuada, teniendo en cuenta: (i) la garantía del flujo oportuno y efectivo de recursos para financiar los servicios de salud, (ii) la definición de un trámite ágil y claro para auditar las solicitudes de recobro sin que el tiempo que dure el auditaje obstaculice el flujo de los recursos (iii) la transparencia en la asignación de los recursos del Fosyga y (iv) la asignación de los recursos para la atención eficiente de las necesidades y prioridades de la salud.

El 1° de febrero de 2009, el Ministerio de Protección Social deberá remitir a la Corte Constitucional la regulación mediante la cual se adopte este nuevo sistema. El nuevo sistema deberá empezar a ser aplicado en el tercer trimestre del año 2009, en la fecha que indique el propio regulador.

**Vigésimo octavo.– Ordenar** al Ministerio de la Protección Social que, si aún no lo han hecho, adopte las medidas necesarias para asegurar que al momento de afiliarse a una EPS, contributiva o subsidiada, le entreguen a toda persona, en términos sencillos y accesibles, la siguiente información,

(i) *Una carta con los derechos del paciente.* Esta deberá contener, por lo menos, los derechos contemplados en la Declaración de Lisboa de la Asociación Médica Mundial (adoptada por la 34ª Asamblea en 1981) y los contemplados en la parte motiva de esta providencia, en especial, en los capítulos 4 y 8. Esta *Carta* deberá estar acompañada de las indicaciones acerca de cuáles son las instituciones que prestan ayuda para exigir el cumplimiento de los derechos y cuáles los recursos mediante los cuales se puede solicitar y acceder a dicha ayuda.

(ii) *Una carta de desempeño.* Este documento deberá contener información básica acerca del desempeño y calidad de las diferentes EPS a las que se puede afiliarse en el respectivo régimen, así como también acerca de las IPS que pertenecen a la red de cada EPS. El documento deberá contemplar la información necesaria para poder ejercer adecuadamente la libertad de escogencia.

El Ministerio de la Protección Social y el Consejo Nacional de Seguridad Social en Salud deberán adoptar las medidas adecuadas y necesarias para proteger a las personas a las que se les irrespeta el derecho que tienen a acceder a la información adecuada y suficiente, que les permita ejercer su libertad de elección de la entidad encargada de garantizarles el acceso a los servicios de salud. Estas medidas deberán ser adoptadas antes del primero (1º) de junio de 2009 y un informe de las mismas remitido a la Corte Constitucional.

**Vigésimo noveno.- Ordenar** al Ministerio de Protección Social que adopte las medidas necesarias para asegurar la cobertura universal sostenible del Sistema General de Seguridad Social en Salud, en la fecha fijada por la Ley – antes de enero de 2010–. En caso de que alcanzar esta meta sea imposible, deberán ser explicadas las razones del incumplimiento y fijarse una nueva meta, debidamente justificada.

**Trigésimo.- Ordenar** al Ministerio de Protección Social que presente anualmente un informe a la Sala Segunda de Revisión de la Corte Constitucional, a la Procuraduría General de la Nación y a la Defensoría del Pueblo, en el que mida el número de acciones de tutela que resuelven los problemas jurídicos mencionados en esta sentencia y, de no haber disminuido, explique las razones de ello. El primer informe deberá ser presentado antes del 1º de febrero de 2009.

**Trigésimo primero.- Ordenar** a la Secretaría General, efectuar las notificaciones de las órdenes contempladas en los numerales décimo sexto a trigésimo y comunicar esta sentencia a la Procuraduría General de la Nación y a la Contraloría General de la República, en especial, el apartado (6.1.3.).

**Trigésimo segundo.- Ordenar** a la Secretaría General de esta Corporación remitir copia de la presente sentencia al Consejo Superior de la Judicatura para que la divulgue entre los jueces de la república.

**Trigésimo tercero.- Ordenar** a la Secretaría General, remitir copia de la presente sentencia al Ministerio de la Protección Social, al Ministerio de Hacienda y Crédito Público, a la Superintendencia Nacional de Salud, al Consejo Nacional de Seguridad Social en Salud, a la Comisión de Regulación, al Procurador General de la Nación, al Defensor del Pueblo y a los Defensores de los usuarios de salud, una vez sean estos designados.

**Trigésimo cuarto.- Desacumular** los expedientes de la referencia para los efectos procesales correspondientes.

**Trigésimo quinto.- Librar**, por medio de la Secretaría General, las comunicaciones previstas en el artículo 36 del Decreto 2591 de 1991.

Notifíquese, comuníquese, publíquese en la Gaceta de la Corte Constitucional y cúmplase.

MANUEL JOSÉ CEPEDA ESPINOSA  
Magistrado

JAIME CÓRDOBA TRIVIÑO  
Magistrado

RODRIGO ESCOBAR GIL  
Magistrado

MARTHA VICTORIA SÁCHICA MÉNDEZ  
Secretaria General

## PRIMER ANEXO

### **I. Antecedentes de los expedientes acumulados y de las correspondientes medidas cautelares adoptadas en cada caso**

A continuación se presentaran los hechos de cada uno de los procesos de acción de tutela que han sido acumulados para ser resueltos conjuntamente mediante la presente sentencia, así como las correspondientes medidas cautelares. Este anexo forma parte integral de la sentencia.

#### **1. Expediente T-1281247** (*acceso de un menor a un servicio no incluido en el POS –implante coclear–*)

##### **1.1. Hechos y solicitud**

El 19 de septiembre de 2005, Luz Mary Osorio Palacio, actuando en representación de su hijo Alex Mauricio Duque Osorio, interpuso acción de tutela en contra de Salud Colpatria EPS, por considerar que esta entidad le violó los derechos a la vida, a la salud y a la subsistencia digna de su hijo –un menor de 10 años que padece de sordera neurosensorial profunda bilateral de etiología desconocida–, al haberle negado un implante coclear en su oído derecho, por tratarse de un servicio de salud que no está incluido dentro del Plan Obligatorio de Salud, POS.

1.1.1. El médico que ordenó el servicio, el otorrinolaringólogo del Hospital Universitario del Valle y del Centro Médico Imbanaco, Doctor Pedro Blanco Sarmiento, según afirma la accionante, es quien atiende a su hijo desde “*hace un tiempo*”. La accionante solicita que se tenga en cuenta que es el “*(...) único especialista en implantes cocleares de la ciudad de Cali que está llevando a cabo estos procedimientos quirúrgicos (...)*”. Este médico ha atendido al menor desde que tiene tres años y medio, en calidad de beneficiario de la EPS SOS, entidad a la que estuvo afiliado previamente, en calidad de cliente particular, e incluso por solidaridad, sin cobrar la consulta. El médico tratante ordenó el implante en el oído derecho después de haber agotado otros tratamientos médicos, como por ejemplo, el uso de audífonos y un implante anterior en el oído izquierdo, sin haber obtenido buenos resultados. El primer implante, colocado al menor en el año 2001, generaba ahora el riesgo de producirle una infección (meningitis). La accionante afirma que el menor ahora es beneficiario de Salud Colpatria EPS y también se encuentra cubierto por un plan de medicina prepagada con la misma entidad. No sabe si el médico que ha ordenado el implante está adscrito a Salud Colpatria o no.

1.1.2. El menor se encuentra en calidad de beneficiario de su padre (Javier Duque Agudelo), quien labora en la empresa Sucromiles SA, desempeñando un cargo operario, con el cual devenga mensualmente alrededor de dos

salarios mínimos legales vigentes. La madre, ama de casa, vive en casa de un hermano junto con su hijo, y recibe una pequeña cuota alimentaria. Sostiene que no es posible para ellos como padres del menor asumir el costo del servicio de salud solicitado, puesto que puede estar entre 60 y 70 millones de pesos.

1.1.3. Salud Colpatria EPS consideró que no ha violado los derechos del menor, puesto que no es su deber suministrar el implante coclear, en tanto “*no se encuentra incluido en el POS*”; no indicó ninguna otra razón para justificar su actuación. También solicitó al Juez que si va a inaplicar la reglas legales y reglamentarias y a ordenar el servicio, ordene también el recobro ante el Fondo de Solidaridad y Garantía, Fosyga, y tenga en cuenta que esto sólo lo puede hacer una vez se hayan agotado las opciones establecidas en el POS.

## **1.2. Decisión de primera instancia**

1.2.1. El 3 de octubre de 2005, el Juzgado 30 Civil Municipal de Cali resolvió negar la tutela por considerar que los derechos del menor no han sido violados por Colpatria EPS ni por Colpatria Medicina Prepagada. A pesar de que el médico tratante del menor se pronunció acerca de la necesidad del implante coclear y del impacto negativo que no suministrarlo tendría en su vida, y a pesar de que medicina legal corroboró tal valoración, el Juez de instancia consideró que la EPS no violaba el derecho a la salud del menor, por cuanto se trataba de un médico que no está adscrito a Colpatria EPS y, en tal medida, su concepto no vincula a la EPS. Para el Juez, de acuerdo a la jurisprudencia constitucional (T-220 de 2003), “*sin la prescripción del médico tratante, la respectiva EPS no tiene ninguna obligación de proporcionar el servicio médico requerido*”. Por otra parte, tampoco consideró que Salud Colpatria, en tanto medicina prepagada, hubiese violado el derecho a la salud del menor, por cuanto el servicio requerido está sujeto al contrato y a las exclusiones pactadas en éste, y en el caso concreto, el acuerdo entre las partes contempla una “*(...) cláusula que excluye el suministro de prótesis por la entidad contratante, (que) es absolutamente clara (...)*”.

1.2.2. Sin embargo, el Juez reconoció que en virtud del derecho fundamental a la salud, el menor debe ser atendido por un especialista y, de ser necesario, garantizarle el suministro del implante coclear y la cirugía respectiva. Además, reconoció que existía la posibilidad de que la EPS reiterara su negativa posteriormente, por lo que también resolvió,

*“(...) aclarar que el niño tiene derecho a consulta especializada con los médicos autorizados por Salud Colpatria (Programa EPS) a fin de determinar con precisión si requiere del implante coclear, y en caso de que el especialista lo disponga deberá realizarse, pues de lo contrario queda el accionante en libertad de instaurar acción de tutela para tal efecto.”*

## **1.3. Impugnación**

1.3.1. La accionante consideró que de acuerdo con jurisprudencia de la Corte Constitucional posterior a la citada por el Juez de instancia (específicamente cita las sentencias T-038 de 2005 y T-089 de 2005), “(...) *la entidad promotora de salud debería darle curso a la solicitud sin importar si el médico era o no adscrito a la EPS. || La única manera de poder negar el procedimiento era que de manera previa otro especialista en la misma área de la medicina del que formuló el tratamiento (Médico otorrinolaringólogo especialista en otología en implantes cocleares) evaluara al paciente y concluyera la no pertinencia del mismo. || Pero en el presente caso, la EPS simplemente se limitó a negarlo so pretexto de no estar en el POS.*”

1.3.2. Salud Colpatria EPS, por su parte, reiteró que negaba el servicio ordenado al menor, por no estar incluido dentro del Plan Obligatorio, POS. Nada dijo o comentó con relación al hecho de que el médico tratante que había ordenado el servicio no estaba adscrito a su EPS, tampoco cuestionó el concepto en cuestión por razones técnicas.

#### **1.4. Decisión de segunda instancia.**

1.4.1. El 15 de noviembre de 2005, el Juzgado 11 Civil del Circuito de Cali resolvió confirmar la decisión de primera instancia por las mismas razones, esto es, por considerar que Salud Colpatria EPS no violó los derechos del menor, pues el servicio de salud no había sido ordenado por un médico tratante adscrito a la EPS. Para el juez de instancia, no es posible proteger el derecho del menor al implante coclear porque ‘*no se dan las subreglas del precedente constitucional*’. Dice al respecto la sentencia,

*“(...) la decisión adoptada por el Juzgado Treinta Civil Municipal de Cali (...) es acertada puesto que no se dan las subreglas del precedente constitucional, por cuanto la cirugía de implante coclear solicitada no ha sido ordenada por el médico adscrito a Salud Colpatria EPS, ni está contemplada dentro del contrato de medicina prepagada con la misma entidad (...).”*

La juez considera que las reglas aplicables al caso concreto han sido fijadas en las sentencias SU-480 de 1997 y T-488 de 2001, y que la manera como tales reglas deben ser aplicadas a un caso como el analizado se determinaron en la sentencia T-236 de 2004 en la cual se resolvió negar éste servicio de salud por la misma razón.

1.4.2. Sin embargo, la Juez advirtió que al hijo menor de la accionante sí le asiste el derecho a ser atendido adecuadamente por Salud Colpatria EPS. Dijo al respecto la sentencia de segunda instancia,

*“No obstante lo anterior, y considerando el diagnóstico del doctor Pedro Blanco S., además del Informe Médico Legal allegado por el Instituto Nacional de Medicina Legal y Ciencias Forenses (fl. 57),*

*este despacho a fin de proteger el derecho fundamental del niño a la salud como consagra el artículo 44 de la Constitución Política, comparte lo resuelto por el [Juez de primera instancia], respecto a que el menor (...) tiene derecho a consulta especializada en COLPATRIA EPS para que se realice una valoración por un equipo multidisciplinario compuesto por los especialistas adscritos a su red de servicios, a efectos de que se establezca con precisión si el niño requiere del implante coclear, para recobrar la capacidad de audición, y establecer el procedimiento a seguir.”*

### **1.5. Pruebas y medidas cautelares ordenadas por la Sala de Revisión**

1.5.1. Mediante Auto de junio 9 de 2006, la Sala de Revisión ordenó a Salud Colpatria EPS, a título de medida provisional, cumplir su deber de evaluar médicamente la condición del menor, tal y como le corresponde constitucional y legalmente. Concretamente, la Sala ordenó a la EPS que

*“(...) el menor Alex Mauricio Duque Osorio sea evaluado por un médico especialista en condiciones de salud como la sordera neurosensorial profunda bilateral de etiología desconocida en menores de edad, quien deberá determinar, en el término máximo de un mes, contado a partir de la notificación de este auto, cuál es el tratamiento médico más adecuado para Alex Mauricio Duque Osorio, disponible en el mercado colombiano.*

*El médico especialista que sea seleccionado para dar cumplimiento a la orden establecida en el inciso anterior, deberá tener acceso de manera expedita a la historia médica de Alex Mauricio Duque Osorio que repose en IPS que lo hayan atendido en virtud de su afiliación a Salud Colpatria S.A. Medicina Prepagada y a Salud Colpatria S.A. EPS. De igual manera, deberá tener acceso expedito a la historia médica del menor que repose en el consultorio de su médico tratante, el doctor Pedro Blanco Sarmiento del Centro Médico Imbanaco de Cali (...), y a las justificaciones médicas, por él rendidas, sobre el tratamiento que requiere Alex Mauricio Duque Osorio.”*

1.5.2. Adicionalmente, la Sala ordenó como medida provisional, que una vez evaluado el menor, Salud Colpatria EPS tomará las medidas necesarias para garantizar su acceso al servicio de salud requerido, de acuerdo con el orden constitucional vigente, si se constata que éste se requiere con necesidad. La Sala resolvió al respecto en el Auto en cuestión,

*“Ordenar a Salud Colpatria EPS que una vez que el médico especialista que evalúe a Alex Mauricio Duque Osorio (...) determine cuál es el tratamiento médico más adecuado, disponible en el mercado colombiano, para el menor, esta decisión deberá ser*

*sometida inmediatamente a evaluación científica por parte del Comité Técnico Científico de esta entidad, quien dispondrá de quince (15) días calendario para emitir su concepto científico acerca de la necesidad o la pertinencia del tratamiento médico propuesto por el referido especialista.*

*Tal como lo ha señalado la jurisprudencia constitucional, el Comité Técnico Científico de Salud Colpatria EPS sólo podrá oponerse al tratamiento propuesto por el referido especialista adscrito a la entidad, siguiendo el procedimiento que fue establecido provisionalmente por la Corte Constitucional en la sentencia T-344 de 2002, ante la ausencia de reglamentación al respecto, y que fue definido en los siguientes términos: (el concepto del Comité Técnico Científico debe estar basado en) ‘(1) la opinión científica de expertos en la respectiva especialidad y (2) la historia clínica del paciente, esto es, los efectos que concretamente tendría el tratamiento solicitado en el accionante’.*

*En el evento que el Comité Técnico Científico de Salud Colpatria S.A. EPS desvirtúe la necesidad o la pertinencia del tratamiento ordenado por el especialista que revisó al menor en virtud de la orden contenida en el numeral primero de este auto, el Comité Técnico Científico de esta entidad deberá proponer, dentro del término señalado en el inciso primero de este numeral, un tratamiento médico sustituto que sea el más adecuado por atender la patología de Alex Mauricio Duque Osorio y que se encuentre disponible en el mercado colombiano.”*

1.5.3. La Sala también ordenó que el tratamiento que fuera considerado necesario para el menor debería ser practicado en un término máximo de dos meses, incluyendo no sólo el implante coclear solicitado por la accionante para su hijo, sino también todos aquellos demás servicios de salud que se consideren necesarios.

1.5.4. Finalmente, la Sala solicitó (i) a Salud Colpatria EPS que informara si ya se habían tomado medidas para dar cumplimiento a las sentencias de primera y segunda instancia dentro del proceso de la referencia, que reconocieron el derecho que le asiste al menor para ser evaluado y tratado; y (ii) a Salud Colpatria EPS y a Salud Colpatria Medicina Prepagada, especificar “*qué les corresponde cubrir a cada una, según las normas vigentes y los contratos celebrados y qué mecanismos existen para resolver los eventuales desacuerdos, en lo que respecta a los servicios médicos formulados al menor Alex Mauricio Duque Osorio*” y “*cuál es la relación jurídica existente entre*” ambas entidades.

1.5.5. En comunicación del 12 de julio de 2006, Jaime Ramírez Garzón, representante legal de “*Salud Colpatria SA Medicina Prepagada y Entidad Promotora de Salud*”, respondió informó a la Sala de Revisión lo siguiente,

*“El 16 de noviembre del 2005 dicho Instituto [Imbanaco] emite solicitud para retirar electrodo de cóclea del Implante colocado en el año 2001. Esta solicitud fue negada por no ser cobertura de POS ni del contrato de medicina prepagada, pero en cumplimiento de una medida provisional ordenada por el Juez 2° Civil Municipal de Cali el 23 de noviembre de 2005 se dio la autorización por parte de Salud Colpatria EPS y el implante fue retirado (anexamos copia del oficio N° 2201 de noviembre 24 de 2005).*

*Como quiera que el fallo del Juez Segundo Civil Municipal de Cali ordenó dar tratamiento integral al menor Alex Mauricio Duque, se continuó su tratamiento en el Instituto para Niños Ciegos y Sordos del Valle del Cauca.*

*El 16 de enero de 2006 la Comisión Interdisciplinaria del Instituto, emite concepto donde aclaran que por razones clínicas debió ser retirado el implante de oído izquierdo que usaba desde el 2001 y consideran que existe la posibilidad de implantar el oído derecho. Por lo tanto debe ser sometido a protocolo de evaluación del programa de implantes cocleares.*

*El 6 de marzo de 2006 se emite autorización para la valoración del menor y en esta cita se solicita Cocleografía por resonancia magnética, la cual fue autorizada.*

*El 5 de mayo de 2006, el Instituto cita al médico de la EPS Colpatria a sus instalaciones para hacer entrega del resultado de la evaluación, donde se considera que el beneficio del implante no sería el mejor, pero que tendría sonidos del ambiente.*

*La Comisión interdisciplinaria del Instituto recomienda que se le haga entrega a los padres y ellos definan si quieren someter al niño al procedimiento teniendo en cuenta que el resultado no sería el mejor.*

*La primera semana de junio de 2006, los padres del menor entregan comunicación donde informan que están dispuestos a que se realice el implante.*

*Colpatria EPS solicitó cotización al Instituto y el día de 5 de julio de 2006 se entregó la autorización para que se proceda a colocar el implante.*

*El tratamiento que ha requerido el menor se ha autorizado por Salud Colpatria EPS con recobro al Fosyga, ya que el contrato de medicina prepagada no tiene cobertura para prótesis, y así lo*

*dispuso el Juez Segundo Civil del Circuito Municipal de Cali.”*

Salud Colpatria señaló con relación a su naturaleza jurídica, que es una empresa privada autorizada para funcionar como EPS y como empresa de medicina prepagada. Salud Colpatria aclara que cuando una persona contrata con su compañía de medicina prepagada tiene sinnúmero de exclusiones y restricciones que incluyen, entre otros servicios, el implante coclear que requiere el menor. La EPS menciona con relación a su contrato de medicina prepagada lo siguiente,

*“Al interior de la Ley que rige este conflicto, es decir el contrato de medicina prepagada, existe de manera expresa, taxativa e inequívoca, la exclusión de preexistencia, patologías congénitas, suministro de aparatos de prótesis, material de osteosíntesis, bragueros, lentes, monturas, muletas, aparatos ortopédicos, piezas anatómicas, órganos para transplante, marcapasos, amplificadores para la audición, los cuales de necesitarse serán por cuenta exclusiva del usuario, la cual fue aceptada por el contratante, al momento de su suscripción. (...)”*

1.5.6. Dentro de los documentos remitidos como prueba de las distintas actuaciones adelantadas por Salud Colpatria EPS y por el Instituto para Niños Ciegos y Sordos para garantizar al menor el acceso al servicio requerido, se remitió copia del oficio que les había sido enviado por el Juzgado Segundo Civil Municipal de Cali, para comunicarles la medida cautelar que había sido adoptada el 23 de noviembre de 2005, dentro de una nueva acción de tutela interpuesta por los padres del menor, debido a que a su juicio la violación a los derechos de su hijo persistía, ante la desatención. Se trató de una medida judicial encaminada a garantizar de forma inmediata los derechos del menor, debido a la gravedad y urgencia que demandaba la situación. Dispuso el Juzgado Segundo Civil Municipal de Cali,

*“1- Admitir la presente solicitud de Tutela propuesta por Luz Mary Osorio Palacios como representante de su hijo menor Alex Mauricio Duque Osorio contra la entidad Colpatria EPS y désele trámite con la preferencia sobre los demás asuntos, por estar ajustada a derecho y a lo reglamentado por el Decreto 2591 de 1991 y demás decretos reglamentarios.*

*2- Conforme al artículo 19 del citado Decreto y con el fin de recaudar información sobre el asunto en litigio, el Juzgado ordena oficiar a fin de que se informe a éste Despacho (...) los motivos por los cuales no se ha autorizado ‘la orden que otorgue el cubrimiento total e integral a la enfermedad del menor, lo cual incluye la cirugía y los elementos que se requieren con urgencia para evitar que la infección llegue al Sistema Nervioso Central’, puesto que esta falta de gestión vulnera altamente los derechos fundamentales a la vida, a la salud, a la igualdad, a la seguridad social, a la dignidad*

*humana e inclusive los derechos de los menores.*

*De igual forma se ordena como medida provisional, teniendo en cuenta el alto riesgo de infección al sistema nervioso central al menor, se expidan de manera inmediata las órdenes pasadas y presentes requeridas por los médicos tratantes para el retiro del implante coclear y todo lo que sea del caso y conexo, como medicamentos POS y No POS, con la finalidad de salvar al menor del peligro de la infección, lo cual deberá suministrarse sin exigir pago por los servicios prestados.*”

El 5 de julio de 2006, Salud Colpatria EPS autorizó al Instituto para Niños Ciegos y Sordo, implantar el sistema coclear Hi-Res 90K (Aupia) y la etapa quirúrgica al menor Alex Mauricio Duque Osorio.

**2. Expediente T-1289660** (*acceso a servicio de salud incluido en el POS, sometido a pagos moderadores –coronariografía con cateterismo izquierdo y ventriculografía–*)

### **2.1. Hechos y solicitud**

El 13 de diciembre de 2005, Marlene Betancourt Mosquera (46 años) presentó acción de tutela contra SaludCoop EPS por considerar que esta entidad desconoce sus derechos a la vida y a la salud, al negarse a autorizar la práctica de un servicio de salud incluido en el POS que ella requiere, (*coronariografía con cateterismo izquierdo y ventriculografía*), en razón a su estado de salud (*soplo en el corazón*), debido a que no ha cancelado el pago moderador correspondiente –un copago equivalente al 11.5% del costo del servicio–.

2.1.1 El copago se justifica en el hecho de que el esposo de la accionante, el afiliado al sistema, sólo ha cotizado 86, de las 100 que se exigen para aquellas consideradas catastróficas, según el artículo 61 del Decreto 806 de 1998. El servicio requerido, es un examen diagnóstico, necesario para definir posteriormente el manejo quirúrgico que requiere su enfermedad. La accionante está inscrita en la EPS accionada en calidad de beneficiaria de su esposo, y carece de la capacidad económica para asumir el porcentaje que le corresponde del costo del servicio, en tanto ellos y sus dos hijas (de 1 y 9 años) dependen de su esposo, un vigilante que devenga el salario mínimo. La cuota anual por copago, alega la EPS, sólo puede llegar a ser de \$109.000 pesos, como máximo (por ser el rango 1, en razón al sueldo del esposo, de quien ella depende económicamente), por lo que considera que con su actitud no está desconociendo los derechos constitucionales invocados por la accionante.

### **2.2. Decisión de instancia**

El 27 de diciembre de 2005, el Juzgado 5° Penal Municipal de Cali resolvió negar el amparo de tutela, por considerar que la EPS no había desconocido los

derechos a la vida y a la salud de la accionante al negarse a autorizar la práctica del servicio de salud requerido, hasta tanto ella no haya cumplido con las obligaciones que le corresponden de acuerdo a la ley. Dijo la sentencia al respecto,

*“(…) no le es dable al juez de tutela, entrar a modificar, derogar, dejar sin vigencia o controvertir una norma como es en este caso la Ley de seguridad social en Colombia (ley 100/93), hacerlo sería ir en contra del ordenamiento jurídico y la estabilidad del sistema de seguridad social. La pretensión de la accionante no tiene fundamento alguno, ya que la entidad accionada al hacerle los respectivos cobros por copagos, solo se limita a cumplir las normas constitucionales y legales y su pretensión es meramente económica.*

*(…)*

*(…) este Despacho considera improcedente tutelar el derecho invocado a favor del señor (sic) Marlene Betancourt Mosquera, por cuanto no se evidencia que la entidad accionada haya vulnerado derecho fundamental alguno, y sí por el contrario la presente tutela, tiene un fin netamente económico, situación que como se analizó sale de la esfera de protección que hace la norma constitucional, a través de la acción de tutela, cuando se busca la protección a la vulneración de un derecho fundamental.*

*Aunado a lo anterior, si la señora Marlene Betancourt Mosquera pretende la exención de los copagos y cuotas moderadoras por parte de su EPS, deberá además demandar ante la jurisdicción competente la ley de seguridad social, pero no es el juez de tutela quien le exonere del pago de una cuota que por ley, es de obligatorio cumplimiento para todos.”*

### **2.3. Comunicación del Ministerio de la Protección Social**

El 30 de diciembre de 2005, el Ministerio de la Protección Social, tres días después de proferido el fallo, comunicó al Juez de primera instancia que el procedimiento requerido por la accionante sí está incluido dentro del POS, pero que está sometido a un período mínimo de cotización de 100 semanas. Indicó que las EPS *“(…) en ninguna situación quedan exoneradas de su responsabilidad de aseguramiento para con sus afiliados, y si bien existen ciertos servicios con condiciones de acceso determinadas, deben seguir atendiendo los contenidos del POS en los términos reglamentados.”*

### **2.4. Medida cautelar y pruebas solicitada por la Corte Constitucional**

2.4.1. Considerando el riesgo existente para la salud de la accionante, certificado por su médico tratante y por el Instituto Nacional de Medicina Legal y Ciencias Forenses, en el trámite ante el juez de primera instancia, esta

Sala de Revisión de la Corte Constitucional, mediante auto del 6 de abril de 2006, resolvió dictar una medida cautelar orientada a proteger los derechos a la vida y a la salud de ella. La Sala ordenó a Saludcoop EPS autorizar la práctica del servicio de salud requerido, en el término de 48 horas, advirtiéndole que no indicaba quién es el responsable de asumir el costo del mismo.

2.4.2. El 4 de mayo de 2006, Saludcoop EPS informó a la Corte Constitucional que el procedimiento ya le había sido practicado a la accionante.

2.4.3. Adicionalmente, la Sala solicitó información al Ministerio de la Protección Social y a la Superintendencia Nacional de Salud, acerca de si el padecimiento sufrido por la accionante ha de entenderse como una enfermedad catastrófica y acerca de si tal clasificación autoriza a la EPS a condicionar la autorización del servicio de salud requerido, a que se hubiera cancelado un copago, por tratarse de una enfermedad catastrófica, padecida por una persona beneficiaria de alguien que había cotizado 86 de las 100 semanas exigidas como periodo mínimo. La Corte también indagó acerca de los mecanismos con los que se cuenta para resolver los conflictos que se presentan en estos casos, así como las formas de financiamiento con las que cuentan las personas que carecen de capacidad económica para realizar los pagos correspondientes.

2.4.3.1. Mediante escrito del 16 de junio de 2006, el Ministerio de la Protección Social respondió las cuestiones propuestas.

2.4.3.1.1. En cuanto al carácter catastrófico de la enfermedad que padece la accionante, el Ministerio indicó lo siguiente,

*“(…) no existe en el Sistema General de Seguridad Social en Salud exactamente un listado con la clasificación de enfermedades catastróficas o ruinosas y en el Plan Obligatorio de Salud, lo que existe es la clasificación de prestaciones o tratamientos para efectos de aplicar condiciones para reconocimiento de prestaciones a los afiliados, como es la exigencia de antigüedad (periodos mínimos de cotización) en el régimen contributivo por parte de la aseguradora, excepción en el pago de copagos (ver Acuerdo 260 de 2004) y lo relacionado con el obligatorio reaseguro para la EPS.*

*Los tratamientos de ‘alto costo’ en el Plan Obligatorio de Salud del Régimen Contributivo en términos de procedimientos e intervenciones y servicios son los descritos en los artículos 17 y 117 de la Resolución 5261 de 1994. En el Régimen Subsidiado esta categoría de prestaciones está descrita en el numeral 3 del Acuerdo 306 del CNSSS.*

*La clasificación de una determinada afección o de un conjunto de patologías como por ejemplo una ‘coronariopatía’ como*

*enfermedad catastrófica o de alto costo depende de que se cumpla con la mayoría de los criterios señalados en el artículo 16 de la citada Resolución; pero cabe resaltar que en el Sistema tal clasificación no tiene efectos y lo importante es la clasificación del tratamiento de las misma como de 'alto costo' por lo antes expresado. Para una enfermedad coronaria por ejemplo hay casos en que el tratamiento no es de alto costo al no requerir procedimientos quirúrgicos dentro de su atención en el caso de no requerir internación en UCI que son los tratamientos considerados de alto costo o de nivel IV del Plan Obligatorio de Salud.”*

2.4.3.1.2. En cuanto a los mecanismos con que cuentan las personas para acceder a los servicios de salud que requieren para preservar su vida o su integridad personal, cuando con relación a ellos se exige un copago que no tienen la capacidad económica de realizar, dijo lo siguiente,

*“(…) no hay ninguna disposición legal que permita exonerar al afiliado del copago, a excepción de lo establecido en el artículo 7 del acuerdo 260 de 2004, toda vez que el artículo 163 de la ley 100 de 1993 y el parágrafo del artículo 3 del citado acuerdo, establecen la obligación de dicho pago.*

*No obstante, el cobro de dicha cuota, no debe ser una barrera para acceder a los servicios de salud, en este sentido y según lo previsto en el artículo 13 del acuerdo 260 de 2004 que establece que la EPS debe brindar al usuario el servicio de salud y a la vez ésta se encuentra en plena libertad de pactar con el afiliado cualquier forma de pago que le permita al usuario cumplir con la obligación de cancelar el copago respectivo, sin que este se vea perjudicado en la prestación de los servicios de salud que requiera.”*

2.4.3.1.3. Por último, en cuanto al mecanismo con el que cuentan las personas para financiar los pagos que les corresponda hacer al sistema de salud, el Ministerio indicó que éste era el previsto en el artículo 13 del Acuerdo 260 de 2004 del CNSSS.

2.4.3.2. Mediante escrito del 27 de junio de 2006, la Superintendencia Nacional de Salud respondió las cuestiones propuestas.

2.4.3.2.1. En cuanto al carácter catastrófico de la enfermedad que padece la accionante, la Superintendencia indicó lo siguiente,

*“(…) según el artículo 61 del Decreto 806 de 1998, el tratamiento de las enfermedades definidas como catastróficas o ruinosas de nivel IV en el POS, es decir, aquellas señaladas en el artículo 117 del MAPIPOS (Resolución 5261 de 1994), requieren de periodos mínimos de cotización. Por su parte, el artículo 115 de la resolución mencionada indica que la coronariografía, incluyendo*

*cateterismo izquierdo y ventriculografía, es un procedimiento de nivel III. De esta forma, se tiene que el mecanismo diagnóstico referido no está sujeto a periodos mínimos de cotización ni puede ser considerado dentro de las enfermedades catastróficas o ruinosas.”*

Teniendo en cuenta la Ley 972 de 1995, en especial su artículo 3°, y dando aplicación a la cláusula *pro homine*, la Superintendencia Nacional de Salud considera que “(...) respecto de las enfermedades ruinosas y catastróficas allí mencionadas se hace explícita la integralidad en el tratamiento de las mismas.”

2.4.3.2.2. En cuanto a los mecanismos legales y de financiamiento con los que cuenta una persona que se encuentra en las mismas condiciones de la accionante, la Superintendencia indicó lo siguiente,

*“(...) cuando un afiliado carezca de capacidad económica para pagar el copago que exige la prestación de un servicio médico ordenado por su médico tratante, tal circunstancia no puede ser tenida como una barrera para acceder al mismo. Sin embargo, el procedimiento a seguir dependerá de lo siguiente:*

*1- De acuerdo con lo señalado por el artículo 187 de la Ley 100 de 1993 y la exequibilidad condicional del mismo por la Corte Constitucional, cuando la cancelación del copago se convierta en una barrera para acceder al servicio, los actores del sistema, es decir, la respectiva entidad promotora de salud, debe dar una prestación íntegra y adecuada de los servicios, repitiendo los gastos de la parte que correspondía al copago ante el Fosyga, sin que para ello sea necesario que medie una orden judicial, aunque en caso contrario, debe estar acorde con lo que indique el juez de tutela que logre amparar mejor la situación de quien la padece.*

*2- De conformidad con el párrafo del artículo 61 del Decreto 806 de 1998, el afiliado que no tenga capacidad de pago para cancelar el respectivo copago y acredite debidamente esta situación, debe ser atendido por las instituciones públicas prestadoras de servicios de salud o por aquellas privadas con las cuales el Estado tenga contrato, lo anterior sin perjuicio de los matices incorporados por la Alta Corporación. Empero, esta entidad considera que sobre dicha disposición pesa una excepción de inconstitucionalidad, puesto que la Corte Constitucional al declarar la exequibilidad condicionada del artículo 187 de la Ley 100 de 1993, ya aclaró que es responsabilidad de la EPS del caso prestar integral y adecuadamente el servicio requerido.*

*3- Sin embargo, si media intervención del juez constitucional, el artículo 61 anteriormente mencionado puede ser inaplicable en los*

*casos indicados por la jurisprudencia (...) y así, ordenar que la entidad promotora de salud asuma el costo total de la atención integral y repita frente al Estado para recuperar los montos que no estaba obligada a sufragar, es decir, el copago.”*

### **3. Expediente T-1308199** *(reconocimiento de incapacidades, cuando los aportes a Salud fueron extemporáneos y a la vez aceptados por la EPS)*

#### **3.1. Hechos y solicitud**

3.1.1. El 22 de septiembre de 2005, Máximo Daniel Cuello Urzola, quien tiene un delicado estado de salud debido a que padece leucemia, presentó acción de tutela contra el Seguro Social, seccional Cesar, por considerar que la entidad afecta su derecho a la vida y al mínimo vital al negarse a pagar tres incapacidades, cada una de 30 días, debido a que los pagos de los respectivos aportes a la salud a nombre del accionante se habían realizado extemporáneamente al Seguro Social. El accionante reconoce que debido a la difícil situación económica ha tenido que pagar con retraso de algunos días, pero siempre dentro del mes correspondiente. Manifiesta además que es un afiliado que cotiza como independiente y que las incapacidades a las que tiene derecho y se le han negado, son necesarias para su subsistencia.

3.1.2. El 28 de septiembre de 2005, el Gerente del Seguro Social, Seccional Cesar, participó en el proceso de tutela para defender a la entidad de la acusación de haber violado los derechos del accionante. Luego de indicar que dos de las tres incapacidades ni siquiera las había presentado ante el Seguro para su estudio, el Gerente indica que en ninguno de los tres casos el accionante observó el requisito establecido en el numeral 1 del artículo 21 del Decreto 1804 de 1999, según el cual se tiene el derecho a reclamar una incapacidad por enfermedad al haber cumplido, entre otras reglas, la siguiente: “haber cancelado en forma completa sus cotizaciones como empleador durante el año anterior a la fecha de solicitud frente a todos sus trabajadores. Igual regla se aplicará al trabajador independiente, en relación con los aportes que debe pagar al sistema. Los pagos a los que alude el presente numeral, deberán haberse efectuado en forma oportuna por lo menos (4) meses de los (6) meses anteriores a la fecha de causación del derecho...”. Con relación a la incapacidad del 28 de mayo en todos los meses se pagó con algunos días de retraso (enero 6 días, febrero 11 días, marzo 3 días y abril 8 días después), lo mismo ocurrió con la incapacidad del 19 de julio de 2005 (marzo 3 días, abril 8 días, mayo 3 días, y junio 1 día después) y con la incapacidad del 18 de agosto del mismo año, en tres de los cuatro meses (mayo 3 días, junio 1 día, y agosto 4 días después, julio se canceló un día antes).

#### **3.2. Decisión de primera instancia**

El 5 de octubre de 2005, el Juzgado 2° de Familia de Valledupar resolvió tutelar los derechos del accionante y ordenó al Seguro Social que en el término de 48 horas adelantara las gestiones para la cancelación de las

incapacidades en cuestión. La sentencia se remitió a la jurisprudencia constitucional sobre “(...) los pagos extemporáneos de cuotas de afiliación, según la cual opera la figura del allanamiento a la mora cuando la entidad recibe y no rechaza tales pagos. Por lo tanto, al aceptarlos, la entidad deberá cumplir con sus obligaciones, entre las que se encuentra el reconocimiento y pago de las incapacidades.”

### **3.3. Impugnación**

El Gerente del Seguro Social, Seccional Cesar, impugnó la decisión de primera instancia por considerar que no es posible exigir el allanamiento a la mora de los pagos del accionante. Señaló al respecto lo siguiente,

*“No hay allanamiento en la mora en el pago tardío extemporáneo de los aportes en salud del señor Máximo Daniel Cuello Urzola en ningún momento el ISS allanó la deuda, porque el Instituto no recibe el pago de los aportes. Desde el año de 1995 opera el Sistema de autoliquidación y es el empleador quien paga en bancos autorizados para los recaudos. La extemporaneidad de los pagos se traduce en ciclos incompletos no pagados.*

*Este pedido de la ley, no ha sido cumplido en el presente caso y no podemos acceder a las pretensiones de la accionante porque estaríamos incurso en actos que nos acercarían a conductas punibles dentro de la codificación penal.”*

Para el Gerente Seccional del Seguro la violación de los derechos del accionante no proviene de la actuación de la entidad que preside, sino de su propio hecho o del empleador. A su juicio, “(...) el incumplimiento por parte del empleador en el pago oportuno de las cotizaciones del Seguro Social, obliga a aquel y exonera al ISS de la responsabilidad de las pretensiones económicas pretendidas por el accionante.”

### **3.4. Decisión de segunda instancia**

El 28 de noviembre de 2005, la Sala Civil, Familia, Laboral, del Tribunal Superior de Valledupar resolvió revocar la sentencia impugnada por considerar que el accionante no tenía derecho a las incapacidades, debido a que los pagos de las cotizaciones no se habían hecho de forma oportuna. A juicio del Tribunal, “(...) es al empleador a quién le corresponde reconocer la prestación económica al hoy accionante y no al ISS, para salvaguardar así su derecho aludido como violado, ya que el incumplimiento se presenta es por parte del empleador por el no pago de las cotizaciones durante todo el tiempo de la incapacidad, exonerándolo de responsabilidad frente al no pago de las mismas (...)”. Adicionalmente señala que en todo caso, con relación a dos de las incapacidades ni siquiera se había presentado el reclamo ante el ISS, por lo que mal podría hablarse de violación de derecho alguno.

### 3.5. Medida cautelar

3.5.1. Mediante Auto del 22 de junio de 2006, la actual Sala Segunda de Revisión de la Corte Constitucional resolvió dictar una medida cautelar para proteger los derechos fundamentales del accionante. Así, teniendo en cuenta que la jurisprudencia constitucional (i) ha reiterado en varias ocasiones que la acción de tutela es procedente, de manera excepcional, para reclamar el pago de incapacidades laborales, por la importancia que estas prestaciones revisten para la garantía de los derechos fundamentales del trabajador al mínimo vital, a la salud y a la dignidad humana; (ii) ha señalado que cuando una entidad promotora de salud no ha hecho uso de los diferentes mecanismos de cobro que se encuentran a su alcance para lograr el pago de los aportes atrasados, se allana a la mora y, por ende, no puede fundamentar el no reconocimiento de una incapacidad laboral en la falta de pago o en la cancelación extemporánea de las cotizaciones; y (iii) que son varios los casos analizados en los que se ha reiterado esta decisión jurisprudencial, entre ellos, algunos en los que se condenó al Instituto de Seguros Sociales, entidad accionada en el presente proceso; esta Sala de Revisión ordenó al Instituto de Seguros Sociales, Seccional Cesar, como medida cautelar, que en el término máximo de cinco (5) días calendario procediera (1) a dar respuesta a las solicitudes de reconocimiento de incapacidad laboral presentadas por Máximo Daniel Cuello ante dicha entidad —absteniéndose de negar el pago de las incapacidades laborales objeto de acción de tutela de la referencia con fundamento en que el pago de las cotizaciones se hizo extemporáneamente—, y (2) a notificar personalmente dicha respuesta al accionante. Indicó que el Instituto de Seguros Sociales, seccional Cesar, deberá asumir provisionalmente los costos de las incapacidades que sean del caso, hasta tanto se profiera sentencia.

3.5.2. El 15 de diciembre de 2006, el Gerente (e) de la Seccional Cesar del Instituto de Seguros Sociales indicó que mediante la Resolución N° 001094 del 11 de octubre de 2005, se ordenó la cancelación de \$720.610 pesos a favor de Máximo Daniel Cuello Urzola, por concepto de prestaciones económicas correspondientes a 85 días de incapacidad general. La suma se giró el día 21 de octubre de 2005.

**4. Expediente T-1310408** (*acceso a un servicio de salud necesario para preservar la vida o la integridad personal no incluido en el POS, cuando no se tiene la capacidad económica para costearlo –Mamoplastia–*)

#### 4.1. Hechos

4.1.1. Angélica María Rojas Castrillón interpuso acción de tutela el 27 de diciembre de 2005 contra Famisanar EPS, por considerar que se violó su derecho a la salud al negársele una cirugía de reducción de busto, ordenada por su médico tratante para enfrentar el malestar que la aqueja (*gigantomastia + déficit funcional dorso lumbar*), en razón a que se trata de un servicio de salud no contemplado por el Plan Obligatorio de Salud, POS. Dice la acción de tutela,

*“El doctor Felipe Zapata Donado, último médico tratante adscrito a Famisanar EPS, quien diagnosticó Gigantomastia + déficit funcional dorso lumbar, esto asociado a mi voluptuoso busto. Este Doctor ordena cirugía de reducción mamaria (...) siendo este el único medio para contrarrestar el sufrimiento que vengo padeciendo de problemas osteomusculares en la región dorso lumbar, agravado por mi contextura física (Baja Estatura). Una vez ordenado el procedimiento quirúrgico por el Doctor Felipe Zapata Donado, presenté la orden de la cirugía y de los exámenes complementarios a la Coordinación Médica de Famisanar EPS para su aprobación, la cual me fue regresada con la anotación [de] que el procedimiento ordenado no lo cubre el POS.*

*Debo hacer referencia que esta cirugía es por razones ‘patológicas’ como lo diagnostica el doctor Zapata Donado y no por razones estéticas.”*

4.1.2. El 3 de enero de 2006, Famisanar EPS participó dentro del proceso de la referencia por medio de su Apoderada General, Martha Garzón de de Ávila, para indicar que con su comportamiento no ha vulnerado los derechos de la accionante. Primero, porque se trata de un servicio que “no se encuentra incluido dentro de las coberturas del Plan Obligatorio de Salud, de conformidad con la Resolución 5261 de 1994”; segundo, porque “no se puede atribuir, que el dolor de espalda que manifiesta tener adolezca al tamaño de su busto, suele suceder que estos dolores se dan por aspectos multifactoriales que para el caso concreto de la accionante puede ser por malos hábitos posturales en su sitio de trabajo o su exceso de peso”; tercero, porque no está probada la incapacidad económica de la accionante para asumir el costo del procedimiento excluido del POS. Famisanar solicitó que en caso de ser condenada a garantizar la práctica de la cirugía se le reconociera la posibilidad de recobrar ante el Fosyga.

## **4.2. Decisión de instancia**

El 12 de enero de 2006, el Juzgado Décimo Penal Municipal de Barranquilla resolvió negar la acción de tutela de la referencia, de acuerdo con reiterada jurisprudencia constitucional en la materia, porque la accionante “(...) no alega y mucho menos acredita su incapacidad económica para sufragar la cirugía mencionada, ni en el escrito de solicitud de tutela, ni durante el trámite de la acción (...)”. El Juez también tuvo en cuenta que no era claro para la EPS, según su intervención en el proceso, el origen del malestar de la accionante y, por tanto, la solución realmente requerida por ella.

## **4.3. Pruebas ordenadas por la Sala Tercera de Revisión**

4.3.1. La Sala, considerando (i) los hechos del caso, (ii) la facultad de decretar

y practicar pruebas, y (iii) que en el proceso T-1310408 era necesario establecer si la accionante requiere o no el servicio de salud (*mamoplastia*) ordenado por su médico tratante y si la accionante cuenta con la capacidad económica de asumir el costo del servicio en cuestión, resolvió:

[1] Ordenar a Famisanar EPS que remitiera copia del concepto técnico del médico tratante de la accionante que permitió a la Apoderada General de Famisanar EPS afirmar que “*no se puede atribuir, que el dolor de espalda que manifiesta tener adolezca al tamaño de su busto, suele suceder que estos dolores se dan por aspectos multifactoriales que para el caso concreto de la accionante puede ser por malos hábitos posturales en su sitio de trabajo o su exceso de peso.*” También se le pidió explicar por qué se afirma que el servicio de salud requerido por la accionante no se encuentra incluido dentro del POS, teniendo en cuenta lo dispuesto por el artículo 1° del Acuerdo 289 de 2005 del Consejo Nacional de Seguridad Social en Salud, y por qué, en todo caso, se negó el servicio, a pesar de lo dicho por la jurisprudencia constitucional en casos similares.

[2] Ordenar al Doctor Felipe Zapata Donado valorar la situación actual de salud de la paciente con respecto a la afección que le viene tratando y si ratifica la necesidad de que se le practique la cirugía ordenada. También se le ordenó señalar si considera posible que se pueda atribuir el dolor de espalda de la accionante a una causa distinta al tamaño de su busto, indicando cuáles serían la otra u otras eventuales causas, si éstas existen, y el impacto que cada una de éstas tiene en el dolor y el perjuicio que aqueja a la accionante.

[3] Ordenar a la accionante que remitiera las pruebas y documentos que demostraran su incapacidad económica para asumir el costo del servicio de salud requerido por ella.

4.3.2. Famisanar EPS, por intermedio de su Apoderada General respondió que “(...) lo manifestado en la respuesta a la acción de tutela (...) no tuvo como fundamento el concepto del médico tratante de la [accionante].” Indicó que la EPS tiene “(...) instituida una *mesa de tutelas diaria*, integrada por un representante del área de afiliaciones y la abogada del área jurídica responsable del trámite de respuesta de la acción de tutela al Despacho Judicial. La finalidad es analizar de manera conjunta los hechos que motivaron la solicitud de Tutela, las pruebas o anexos aportados por el accionante, y se determine por el representante del área de salud, la pertinencia del procedimiento frente a los contenidos del Plan Obligatorio de Salud, análisis de Historia Clínica, autorizaciones emitidas, interconsultas con médicos tratantes de IPS asignadas y el área de afiliaciones verifica los derechos del usuario, el estado de su afiliación, su IBC, y con estos análisis procede la Abogada a proyectar la respuesta de la acción de tutela.” La EPS indica que en la *mesa de tutela* en la que se analizó el caso de la accionante, participó por el área de salud el Doctor Edgar Ricardo Ríos Romero, en calidad de *Médico Coordinador de Alto Costo y Apoyo Legal*, quien manifestó sobre la solicitud de la accionante: ‘*El dolor de espalda es multifactorial. Se observa que no*

*demuestra, acredita una Reducción de Peso y la cual puede ser el origen de su dolor de espalda. Malos hábitos posturales en su puesto de trabajo’.”* Famisanar solicitó a la Médico Coordinadora de Alto Costo y Soporte Legal actual, doctora Mónica María Bernal Gómez, el análisis de Historia Clínica y evolución del estado de salud de la accionante.

Finalmente, Famisanar EPS sostuvo que “[t]eniendo en cuenta que las Cirugías Plásticas con fines reconstructivos funcionales se entienden aquellas que buscan aproximarse a la reparación de la capacidad de funcionar con miras a corregir en lo posible las alteraciones anatómicas que causan el mal funcionamiento de un órgano sistema, en el caso de la [accionante], no existían evidencias en la Historia Clínica que permitieran establecer la posible relación dolor-dorsal-tamaño mamario, e inferir que se encontraba comprometida la estructura y funcionalidad del seno, por lo tanto se estimó que se estaba frente a una cirugía de carácter estético, no contemplada en el POS.”

4.3.3. Con base en los hallazgos que encontró la Médico Coordinadora de Alto Costo y Soporte Legal de Famisanar EPS en los documentos analizados, esta funcionaria concluyó,

*“Se trata de una paciente femenina en la cuarta década de la vida quien consulta por cuadro clínico de dolor dorsal (espalda) de presentación aguda, haciéndose necesario descartar las múltiples causas del mismo de acuerdo con las características clínicas de presentación, el término multifactorial hace relación a esta consideración.*

*Para este caso en particular se evidencia la asociación de aumento progresivo de 2.5 Kg en cinco meses, no se registra estatura de la paciente y espasmo muscular doloroso por lo cual se realiza la observación de la posible existencia de malos hábitos posturales y sobrecarga dorsal por sobrepeso. Adicionalmente no se evidenciaba que se hubiesen realizado las valoraciones de las especialidades de Ginecología y Ortopedia evaluando integralmente el caso y con el propósito de agotar las opciones de tratamiento para el manejo del dolor las cuales incluyen hábitos de vida saludable en relación con medidas locales en zonas de dolor; alimentación, postura, ejercicio y terapia física e indicación de uso de prendas interiores para soporte de mamas junto con el manejo médico farmacológico analgésico y antiinflamatorio.*

*Es importante anotar que a la fecha no se encuentra registro en la historia clínica relacionado con este cuadro clínico.*

*En consecuencia se debía evaluar el caso interdisciplinariamente, definiendo el origen del dolor, descartando las posibles causas del mismo y confirmando en forma directa la posible relación descrita*

*con el tamaño mamario; para prescribir la cirugía mamoplastia de reducción, así mismo para establecerse si el procedimiento se encuentra en el plan de beneficios del POS y bajo el carácter reestructivo definido en el artículo 1° del Acuerdo 289 de 2005 del Consejo Nacional de Seguridad Social en Salud es esencial definir la posible relación dorsal-tamaño mamario.”*

4.3.4. La accionante remitió a la Sala Tercera de Revisión de la Corte Constitucional “(...) *prueba extrajudicial, certificado laboral, los seis últimos volantes de pago de [su] sueldo, registro civil de nacimiento de [su] hija Cindy Paola López Rojas, recibos de pago del colegio donde estudia [su] hija, recibo de transporte escolar de la niña y los recibos de servicios públicos de la vivienda (...)*” en la cual habita con su hija. Dice al respecto la accionante que con estas pruebas,

*“(...) quiero demostrar que soy una persona asalariada, a la cual su sueldo no le alcanza para practicarse la cirugía de reducción mamaria por el diagnóstico de gigantomastia + déficit funcional dorso lumbar, solicito (...) se tenga en cuenta mi estado actual que es permanentemente doloroso en la parte de la espalda a diario, lo que me impide en muchas ocasiones realizar mis labores en la oficina y en mi casa como madre cabeza de hogar (...)”*

4.3.5. Mediante auto de diciembre 1° de 2006, la Sala de Revisión resolvió, como medida cautelar, ordenar a Famisanar EPS que si aún no lo había hecho, en el término de 48 horas valorara interdisciplinariamente el estado de salud de la accionante —Angélica María Rojas Castrillón—, incluyendo especialistas en *ginecología* y *ortopedia*, para agotar las opciones de tratamiento de la afección de salud que la aqueja en su espalda, de acuerdo con lo dispuesto por la Médico Coordinadora de Alto Costo y Soporte Legal de Famisanar EPS. Se indicó que la valoración de la paciente debía hacerse cuanto antes, fijando como límite máximo, dos meses. La Sala advirtió (i) que en caso de que el tratamiento ordenado por los médicos fuera la cirugía de *mamoplastia*, se entenderá que se trata de un servicio de salud necesario, no estético, y por tanto, contemplado en el POS; (ii) que en el evento de que el tratamiento ordenado a la accionante no estuviera contemplado en el POS, su prestación debía ser garantizada por Famisanar EPS, sin falta ni demora; (iii) que si el costo del tratamiento no podía ser asumido por la accionante dada su precaria situación económica ya probada, Famisanar EPS podría recobrar ante el Fosyga el monto que no le corresponda asumir. Finalmente, la Sala de Revisión advirtió categóricamente que, en cualquier caso, Famisanar EPS debía adoptar las medidas necesarias para garantizar la prestación del servicio, 48 horas después de ser ordenado por el o los médicos tratantes.

**5. Expediente T-1315769** (*acceso a servicio de salud incluido en el POS, sometido a pagos moderadores –carga viral–*)

## 5.1. Hechos y solicitud

5.1.1. El 19 de enero de 2006, *Eduardo* (diagnosticado como VIH positivo, en octubre de 2005) presentó acción de tutela contra Comfenalco EPS, por considerar que esta entidad le viola sus derechos a la vida y a la salud, al negarse a autorizar la práctica de la prueba de carga viral que necesita y que fue ordenada por su médico tratante el 3 de enero de 2006, por no haber cancelado previamente un copago equivalente al 68% del valor del servicio en cuestión. El copago lo justifica la EPS en que el accionante no cuenta con las semanas mínimas de cotización requeridas para acceder al servicio requerido. El accionante considera que la EPS desconoce flagrantemente la Ley 972 de 2005 que impide negar los tratamientos requeridos a personas con VIH. Por tanto, el accionante solicita que se le ordene a la EPS acusada que cuanto antes, garantice la práctica del servicio de salud requerido y cubrir el 100% del costo del mismo. El accionante se encuentra desempleado desde noviembre de 2005 y antes devengaba un salario mínimo legal vigente, por lo que es claro que carece de capacidad económica para asumir el monto que se le está exigiendo.

5.1.2. Comfenalco EPS indicó que de acuerdo con el artículo 75 del Decreto 806 de 1998, luego de que se terminara el periodo de protección laboral, el 30 de enero de 2006, retiró al accionante de la EPS, por lo que ya no existe relación contractual, *usuario-EPS*.

## 5.2. Decisión de instancia

El 14 de febrero de 2006, el Juzgado 13 Civil Municipal de Medellín resolvió negar la acción de tutela, por considerar que Comfenalco EPS no había desconocido los derechos a la vida y a la salud del accionante, en la medida que éste no se encuentra afiliado a aquella, es decir, ya no existe relación contractual. Indicó al respecto el Juez de instancia,

*“(…) es preciso entender que en el caso concreto, el accionante fue retirado por autoliquidación del empleador, luego, a la fecha, Comfenalco EPS no tiene relación alguna con el accionante y por ello mal puede obligarse a la referida entidad a prestar los servicios médicos requeridos por el señor Eduardo; servicios que nacen sencillamente por la calidad de afiliado y tal como ha respondido la entidad, no reúne esa calidad.”*

## 5.3. Medida cautelar

El 16 de mayo de 2006, teniendo en cuenta la reiterada jurisprudencia constitucional en casos similares, la Corte resolvió adoptar varias medidas cautelares para garantizar la protección efectiva de los derechos del accionante. Fundamentalmente, la Corte ordenó a Comfenalco EPS que autorizara al accionante la práctica del examen de carga viral, ordenado por su médico tratante y autorizado por esa entidad el 3 de enero de 2006, en el

evento que aún no le hubiera sido practicado. También ordenó a Comfenalco EPS que en el evento de que el accionante no estuviera accediendo a consultas médicas y exámenes de control y de diagnóstico para el adecuado seguimiento y tratamiento de la enfermedad catastrófica que lo aqueja y a los medicamentos que requiere para tal efecto, debería suministrarle estos servicios médicos (v.gr. consultas médicas, exámenes de control y de diagnóstico y medicamentos). Esta orden debía cumplirse dentro de los 10 días siguientes a la fecha en la que el accionante reciba los resultados del examen de carga viral y previa valoración por parte de un médico especialista afiliado a Comfenalco EPS en el evento de que a la fecha del auto no se le haya practicado este examen, o dentro de diez (10) días, en el evento que a la fecha de notificación de este auto, el accionante ya cuente con los resultados del referido examen de carga viral. Se indicó que los medicamentos y los exámenes de control y de diagnóstico, para el adecuado seguimiento y tratamiento de la enfermedad, deberían ser formulados por un médico especialista, afiliado a Comfenalco EPS, quien tiene el deber de revisar y controlar el estado de salud del accionante.

## **6. Expediente T-1320406** (*acceso de niña vinculada al sistema a un servicio de salud –mamoplastia–*)

### **6.1. Hechos y solicitud**

El 10 de febrero de 2006, Mariela del Socorro Castilla Fernández interpuso acción de tutela en nombre de su hija de 15 años, Yoice Dalila Rueda Castilla, contra la Clínica Cardiovascular Jesús de Nazareth y el Departamento Administrativo Distrital de Salud, DADIS, por violar el derecho fundamental a la salud de su hija. Conforme a la Historia Clínica y la evaluación médica hecha a la niña, presenta una *hipertrofia de glándulas mamarias*, por lo que se le ordenó la práctica de una cirugía plástica. La madre alega que carece de recursos económicos para asumir el costo del servicio de salud requerido, es desempleada, ama de casa y hace las uñas a domicilio; ambas, madre e hija, se encuentran en el nivel 2 del SISBEN. Advierte además, que luego de ser atendida “por medio del SISBEN” y que se le ordenara la cirugía, su hija fue remitida al DADIS, donde se le dio una orden para la clínica Jesús de Nazareth, entidad donde le dijeron que la llamarían, pero nunca lo hicieron.

### **6.2. Decisión de instancia**

El 24 de febrero de 2006, el Juzgado 12 Civil Municipal de Cartagena resolvió negar la tutela porque “(...) *no se ha probado violación de ningún derecho por parte de las accionadas ya que no se ha demostrado dentro de las foliaturas que la vida de la menor se encuentre en riesgo por carecer (sic) de hipertrofia de mama: de igual forma tampoco se ha demostrado que no pueda llevar una vida normal, ya que se manifiesta que sufre de dolores de espalda, pero no que este la incapacite para ejercer sus labores diarias, en especial sus estudios.*”

### 6.3. Medida cautelar

6.3.1. La Sala de Revisión dispuso mediante Auto, como medida cautelar, ordenar al Departamento Administrativo Distrital de Salud de Cartagena, DADIS, que informara las razones específicas por las cuales el médico tratante ordenó a la hija de la accionante el servicio de salud en cuestión (*mamoplastia*), e indicar las razones de carácter médico y clínico por las cuáles la entidad contraría la posición del médico tratante y se niega a autorizar la prestación del servicio. Se solicitó también indicar de manera precisa y específica cuál es el impacto que tiene en la salud y en el desarrollo de la menor beneficiaria de la acción de tutela, la afección de salud que padece.

6.3.2. El Director del Departamento Administrativo Distrital de Salud de Cartagena, DADIS, señaló que de acuerdo con la historia clínica, un médico general solicitó que la menor fuera valorada por un cirujano plástico en razón a los síntomas que tenía (dolor de espalda). El DADIS autorizó a la IPS Clínica Cardiovascular Jesús de Nazareth para que valorara el estado de la paciente mediante un cirujano plástico, para luego “proceder en conformidad”. El Director del DADIS aclara de manera categórica que el especialista (el cirujano plástico), “después de diversos exámenes, mediciones de peso y talla puede diagnosticar la *hipertrofia de glándulas mamarias* y su consecuente tratamiento.” Lo que ocurre, señala, es que aún no hay registro de la valoración por parte del cirujano plástico. Advierte además, que en caso de que un prestador niegue el servicio, es deber del DADIS “generar la autorización a otro prestador”, pero afirma que ello no debería ocurrir porque si la IPS considera urgente y prioritaria la prestación del servicio, lo puede prestar “y luego presentar la correspondiente cuenta para pago de eventos de urgencias y prioritarios sin soporte contractual”. El Director del DADIS señala además, que en caso de que la IPS no lleve a cabo la consulta requerida por la menor, esta puede ser llevada a cabo por un cirujano plástico en las oficinas de la entidad, quien, de ser necesario, puede y debe ordenar la práctica de la *mamoplastia terapéutica*.

6.3.3. Finalmente, mediante Auto del primero de diciembre de 2006, como medida cautelar, la Sala de Revisión de la Corte Constitucional ordenó al Departamento Administrativo de Salud Distrital de Cartagena, DADIS, que si aún no lo había hecho, tomara las medidas necesarias para garantizar que se valorara el estado de salud de la menor y se determinara el tratamiento requerido por ella, considerando especialmente la necesidad de practicar una cirugía de *mamoplastia*, en la IPS que corresponda. Se ordenó que la valoración, en cualquier caso, debía haberse practicado antes de quince días, a partir de notificado el Auto, y el tratamiento un mes después de la misma fecha.

**7. Expediente T-1328235** (*acceso a servicios de salud no incluidos en el POS –medicamentos para diabetes–, solicitud ante el Comité Técnico Científico*)

## 7.1. Hechos

7.1.1. El 14 de febrero de 2006, María Diva Almonacid de Martínez, de 73 años de edad, interpuso acción de tutela en contra de Colmédica EPS, por considerar que la entidad le viola sus derechos a la vida y a la salud, al negarse a garantizar el suministro del medicamento *Gabapantin* 2800mg por día, además de las tiras reactivas para glucosa en sangre, precisión Plus Electrones y jeringas para la aplicación de la insulina; todos éstos, servicios de salud para las afecciones que padece ('diabetes mellitas y neuropatía diabética'). Colmédica EPS solicitó al Juez declarar improcedente la acción de tutela, porque no se agotaron los procedimientos legales establecidos, pues *“(...) el accionante no ha solicitado a través de su médico tratante, a la EPS el suministro del medicamento Gabapentin, como tampoco se agotó el mecanismo legal de CTC de medicamentos, y sí se acudió a la acción de tutela sin agotar los procedimientos previos existentes y determinados por el mismo Estado para la autorización de tales servicios.”*

7.1.2. El Ministerio de la Protección Social, por medio de la Oficina Asesora Jurídica y de Apoyo al Legislativo, solicitó que se negara la acción de tutela por existir otro procedimiento para reclamar el medicamento. Señaló el Ministerio en su intervención,

*“Por encontrarse los medicamentos enunciados excluidos del listado, corresponde al accionante a través de su médico tratante tratar de agotar el procedimiento señalado en el Artículo 8 del Acuerdo 228 de 2002, el cual consagra que para la autorización de medicamentos excluidos del listado debe procederse a presentar el caso por parte del médico tratante ante el Comité Técnico Científico de la respectiva EPS, quien determina la viabilidad del mismo. En el evento de ser negados por éste se deberá insistir, allegando los soportes médicos y técnicos atinentes a la necesidad esencial de los mismos para el bienestar de la salud del accionante.”*

## 7.2. Decisión de instancia

El 10 de marzo de 2006, el Juzgado 38 Civil Municipal de Bogotá resolvió denegar la acción de tutela porque cuando se necesitan medicamentos no incluidos en el POS, se debe presentar el caso ante el Comité Técnico Científico de la EPS; *“(...) sólo cuando el Comité haya negado la autorización para el servicio, [se puede] hacer uso de la acción de tutela (...)”*. Dice el Juez en su sentencia,

*“A manera de información, se le indica al accionante que cuando necesite medicamentos no incluidos en el POS, debe presentar el caso ante el Comité Técnico Científico de la Entidad Prestadora de Salud, solicitando los servicios NO POS de acuerdo con Art. 6 Decreto 3797 de 2003. Ya que es éste quien valora las condiciones*

*del paciente y las normas que regulan la prestación del servicio de salud y decide si autoriza o no los medicamentos, procedimientos o cirugías no incluidas en el POS. Y en el caso de pacientes crónicos como es el caso de autos, luego de realizar la presentación ante el CTC, se establezca un tiempo determinado para el manejo de su patología, los períodos de autorización podrán ser superiores a tres (3) meses y hasta por un año, en cuyo caso el CTC, debe hacer la evaluación por lo menos una vez al año y determinar la continuidad o suspensión del tratamiento.”*

### **7.3. Comunicación de Colmédica EPS y pruebas ordenadas por la Sala de Revisión**

7.3.1. El 12 de julio de 2006, Colmédica EPS remitió una comunicación a la Corte Constitucional, en la que señaló que la accionante pretendía solicitar el servicio sin haber solicitado el tratamiento previamente al Comité Técnico Científico. En la comunicación, la apoderada general de la entidad manifestó,

*“Frente al suministro del medicamento no POS, no obstante existir el mecanismo legal del Comité Técnico Científico de Medicamentos previsto en la Resolución 3797 de 2004 para su autorización, la señora María Diva Almonacid de Martínez acudió al trámite preferente y sumario de la tutela sin haber agotado tal alternativa, y sin darle la oportunidad a la entidad de emitir pronunciamiento de esta entidad.*

[...]

*La señora María Diva Almonacid presentó solicitud al CTC de medicamentos y este órgano en sesión del 5 de mayo de 2006, luego de verificar el cumplimiento de los presupuestos legales establecidos en la Resolución 3797 de 2004, autorizó el suministro del medicamento. Con posterioridad a esta solicitud, no se ha recibido requerimiento adicional alguno por parte de la señora Almonacid.*

*Al contactar a la usuaria e indagarle sobre el motivo por el cual no había vuelto a solicitar el suministro del medicamento al CTC de medicamentos, nos manifestó que había tenido control con el especialista el pasado 10 de julio de 2006 en el Hospital San José, en donde se habían prescrito nuevamente el medicamento GABAPENTYN x 300mg, medicamentos que solicitaría a la EPS*

*Colmédica está pendiente de la solicitud al CTC de medicamentos, para proceder al estudio y verificación del cumplimiento de unos criterios legales establecidos en la Resolución 3797 de 2004, tendientes al suministro del medicamento.*

*Por lo anterior, se solicita respetuosamente a esa honorable Corte, confirmar el fallo proferido por el Juez 38 Civil Municipal de Bogotá, permitiendo a esta entidad, dentro del proceso legal establecido por las normas que regulan el Sistema General de Seguridad Social en Salud, estudiar las solicitudes de la usuaria para el suministro del medicamento.”*

7.3.2. Luego de hacer algunos análisis adicionales de la regulación del Sistema de Salud referente al asunto tratado, Colmédica EPS solicitó a la Corte Constitucional que si le ordena prestar el servicio ordenado a la paciente, se hiciera una declaración explícita con relación al derecho de la EPS para repetir contra el Fosyga. Señaló al respecto,

*“(…) resulta de fundamental importancia realizar la siguiente observación: si pese a lo anotado anteriormente, la Corte Constitucional considera en su sabiduría, que Colmédica EPS debe autorizar el suministro del medicamento no obstante no haberse solicitado aún para la nueva prescripción al CTC de medicamentos, y demás aditamentos excluidos del Plan Obligatorio de Salud POS, respetuosamente solicitamos que dentro de la parte resolutive del fallo que se ha de proferir, se nos reconozca expresamente el derecho de repetir contra la Nación Ministerio de la Protección Social – Fondo de Solidaridad y Garantía, Fosyga, por los costos adicionales, por cuanto en la actualidad no existe ninguna disposición legal que establezca un procedimiento de recobro ante el Fondo de Solidaridad y Garantía, sino que tal derecho ha sido consecuencia del desarrollo jurisprudencial del Corte Constitucional, como se anotó, de tal forma que la falta de consignación del mismo, de manera expresa e inequívoca dentro de la parte resolutive del fallo, impide a la EPS ejercer el derecho que tiene contra el Fosyga, para recobrar su equilibrio financiero.”*

7.3.3. Mediante Auto del 3 de agosto de 2006, la Sala de Revisión ordenó a Colmédica EPS, que en el término máximo de cinco (5) días hábiles, informara a la Sala de Revisión si actualmente se encuentra autorizado, por parte del Comité Técnico Científico de esta EPS, el suministro del medicamento *gabapentin* a la señora Diva Almonacid de Martínez, en la dosis formulada por su médico tratante. Indicó que si el Comité no había aprobado el suministro del medicamento *gabapentin* a la señora Diva Almonacid, Colmédica EPS debería suministrarle este medicamento, en el término máximo de cinco (5) días calendario, de acuerdo con la fórmula expedida por su médico tratante.

7.3.4. El 10 de agosto de 2006, la Representante Legal de la entidad informó a la Sala de Revisión, que el “*Comité Técnico Científico de medicamentos en su sesión de fecha 19 de julio de 2006 autorizó el suministro del medicamento gabapentin en la dosis ordenada por su médico tratante a la señora María Diva Almonacid de Martínez.*”

## **8. Expediente T-1335279** (*acceso a servicios de salud –exámenes diagnósticos– de persona vinculada al Sistema de salud*)

### **8.1. Hechos**

El 20 de febrero de 2006, Nasly Sánchez Zapatero, Personera Distrital Delegada en Derechos Humanos en Cartagena, interpuso acción de tutela en nombre de Jessica Marín Peluffo contra el Departamento Administrativo Distrital de Salud, DADIS, por desconocer sus derechos a la vida y a la salud, al negarse a realizar los exámenes *ecocardiograma doppler, electrocardiografía, frotis y cultivo de la garganta* y a conceder una cita con un especialista (cardiólogo), por “falta de contratos”. La señora Marín Peluffo, de 20 años de edad, padece *faringitis y prolapsa mitral*, enfermedad que ha puesto en peligro su vida; no cuenta con seguridad social y se encuentra en el Nivel 1 del Sisben. Solicita que se garantice su acceso a los servicios de salud que requiere.

### **8.2. Decisión de instancia**

El 13 de marzo de 2006, el Juzgado 12 Civil Municipal de Cartagena, resolvió denegar la acción de tutela por considerar que de las pruebas aportadas al expediente no se puede probar que la vida de la accionante esté en riesgo. La Juez citó a Jessica Marín Peluffo para rendir una declaración juramentada dentro del proceso, pero ella no compareció.

### **8.3. Medida cautelar adoptada por la Sala de Revisión**

Teniendo en cuenta la jurisprudencia constitucional de protección a las personas vinculadas al Sistema de Salud al acceso a los servicios *necesarios*, la Sala de Revisión ordenó mediante Auto del 22 de agosto de 2006 al Departamento Administrativo Distrital de Salud de Cartagena, DADIS, en calidad de medida cautelar, que si aún no lo había hecho, (1) suministrara a Jessica Marín Peluffo, directamente o a través de su señora madre, la *información* que requería para saber cómo funciona el sistema de salud y cuáles son sus derechos, (2) le *indicara* específicamente cuál era la institución prestadora de servicios de salud que tiene la obligación de realizar las pruebas diagnósticas *ecocardiograma doppler, electrocardiografía, frotis y cultivo de la garganta* que requiere y una cita con un especialista, y (3) la *acompañara* durante dicho proceso, con el fin de asegurar el goce efectivo de sus derechos. En todo caso, indicó la Sala, la práctica de las pruebas diagnósticas requeridas debería realizarse en un término no mayor a quince (15) días. La Sala de Revisión también ordenó en el mismo auto comunicar la decisión judicial a la menor, a la Personería Distrital de Cartagena y al Departamento Administrativo Distrital de Salud de Cartagena, DADIS.

## **9. Expediente T-1337845** (*acceso a servicio de salud no incluido dentro del POSS – resonancia magnética de la columna –*)

## 9.1. Hechos

9.1.1. El 13 de febrero de 2006, Olga Patricia Palacio Villa interpuso acción de tutela en contra ECOOPSOS, Entidad Cooperativa Solidaria de Salud, por considerar que se le viola su derecho a la seguridad social en conexidad con el derecho a la vida, al no autorizar el examen de *resonancia magnética de la columna*, ordenado por su médico tratante, por considerarlo necesario para definir el tratamiento que ella requiere con relación a la *hernia de columna lumbisacra* que padece y al cáncer de mama que se le viene tratando. La entidad negó el servicio solicitado porque no se encuentra contemplado dentro del Plan Obligatorio de Salud del régimen subsidiado, POSS, y porque la accionante ya no está afiliada a esa entidad y al régimen subsidiado de salud, debido a que pasó del Nivel 2 del SISBEN al Nivel 3.

9.1.2. ECOOPSOS, entidad que celebró un contrato para la Administración de Recursos del régimen Subsidiado, participó dentro del proceso para señalar que “(...) *en el caso específico y actual, la señora Olga Patricia Palacio Villa se encuentra inactiva en nuestra base de datos, mediante Resolución número 1928 del 01 de diciembre de 2005, de retiro por aumento de nivel, avalada por el señor Alcalde de la localidad, que fue recibida en ECOOPSOS el día 07 de diciembre, para lo cual desde la fecha la señora OLGA ya no se encuentra afiliada en nuestra entidad.*” En declaración rendida ante el Juez de tutela el 6 de marzo de 2006, la accionante afirmó al respecto,

*“(...) Estaba en ECOOPSOS, pero ya me subieron al tercer nivel, estaba en el segundo nivel, me dijeron que ya me habían subido al tercero, que ya no estaba figurando en el sistema de ECOOPSOS, me informaron allá en la oficina de ECOOPSOS, cuando fui a pedir una autorización para una cita en Medellín, allá me dijeron que yo no figuraba allá desde diciembre de 2005 y yo tuve cita el 19 de diciembre con el Oncólogo en Medellín, allá en ECOOPSOS no se habían dado cuenta que desde diciembre ya no figuraba ahí. Y tengo suspendidas las citas de Oncología y el medicamento del cáncer; yo fui a mediados de febrero de este año a pedir la autorización para la cita con el oncólogo que me tocaba en marzo y a reclamar el medicamento Tamoxifeno y me dijeron que no me podían entregar el medicamento ni la autorización de la cita con el oncólogo porque no figuraba ya en el sistema, que porque me habían subido de nivel y siempre he estado muy enferma de esta columna estoy que no me hallo, ya me dijeron que me tocaba colocarle una tutela a la Seccional de Salud, que porque eso les corresponde a ellos. Preguntado: Usted desde cuándo se dio cuenta que la habían retirado de la lista de ECOOPSOS. Contestó: Sería por ahí del 6 al 10 de febrero de este año, me lo dijeron en ECOOPSOS. Preguntado: Usted en el mes de diciembre del año 2005, fue para algo a las oficinas de ECOOPSOS Contestó: Yo fui como el 07 de diciembre a recoger la autorización para la cita con*

*el oncólogo pero ahí no me dijeron nada, sino que me dieron la autorización, me la dieron y yo la llevé a Medellín, porque tenía cita el 19 de diciembre con el oncólogo, yo después les pregunté que por qué no me había dicho nada acerca del retiro cuando yo fui por esa autorización y el dijo que todavía no les habían pasado el informe (...).”*

## **9.2. Decisión de instancia**

El 8 de marzo de 2006, el Juzgado Primero Penal Municipal de Rionegro resolvió denegar la acción de tutela por considerar “(...) *que a la Entidad Cooperativa Solidaria de Salud, ECOOPSOS, no puede endilgarse omisión alguna, ni es la obligada a la prestación del servicio que reclama el accionante.*” A su parecer, la accionante debe acudir a la Dirección Local de Salud o a cualquiera de las entidades con las cuales tenga contrato la Dirección Seccional de Salud de Antioquia.

## **9.3. Medida cautelar adoptada por la Sala de Revisión**

9.3.1. Mediante el Auto de 22 de agosto de 2006 la Sala de Revisión ordenó a ECOOPSOS que si aún no lo había hecho, dentro de las 48 horas, garantizara la práctica del examen ‘*resonancia magnética de la columna*’ a Olga Patricia Palacio Villa. Ordenó también comunicar la decisión a la accionante. Adicionalmente, la Sala ordenó a la Secretaría de Salud del Municipio de Rionegro, Antioquia, que en el término de 5 días, indicara cuál es el proceso que se sigue para desvincular a una persona del régimen subsidiado, por razones de reclasificación del SISBEN, en especial cuando ésta requiere un servicio de salud que compromete su vida o su integridad personal. Se solicitó especificar qué información y ayuda se les brinda a las personas para evitar que la transición ponga en riesgo su derecho a la salud, e indicar cuál fue la labor realizada en el caso de Olga Patricia Palacio Villa.

9.3.2. La Secretaría de Salud del Municipio de Rionegro aportó la información solicitada por la Sala, pero la Entidad Cooperativa Solidaria de Salud, ECOOPSOS, no informó acerca del cumplimiento de la medida cautelar impartida, por lo que la Sala ordenó a dicha Entidad que si aún no lo había hecho, informara las acciones realizadas en cumplimiento de la medida cautelar.

9.3.3. El 13 de diciembre de 2006, el Gerente Seccional COORSALUD-COHAN informó acerca del cumplimiento de la medida cautelar impartida en los siguientes términos,

*“Una vez tuvimos conocimiento del auto de fecha de agosto 22 de 2006 proferido por la Corte, dentro del expediente de la referencia, procedimos a ubicar a la señora Olga Patricia Palacio Villa, con el fin de hacerle entrega de la orden para la práctica del examen resonancia magnética de columna, recibiendo como respuesta de*

*ella que éste procedimiento y/o examen ya le había sido autorizado por la Dirección Seccional de Salud de Antioquia y practicado en el Instituto Neurológico de Antioquia el día 26 de mayo de 2006.*

*Con el fin de tener mayor seguridad frente a la práctica efectiva del examen, solicitamos copia del resultado del mismo, que a su vez remitimos a ustedes para que repose en el expediente.*

*En este orden de ideas hemos estado prestos a cumplir lo ordenado como medida cautelar pro la Corte, no obstante lo anterior para el momento de nuestra autorización en el procedimiento éste ya había sido ordenado por el ente territorial legalmente responsable.”*

**10. Expediente T-1338650** (medios necesarios para que una persona vinculada acceda a un servicio de salud –transplante de tráquea– en lugar distinto a su domicilio)

### **10.1. Hechos**

10.1.1. El miércoles 18 de enero de 2006, Mario Reyes Acevedo, quien se encuentra en el Nivel 1 del SISBEN, interpuso acción de tutela en contra de la Secretaría de Salud del Departamento del Cesar por considerar que le viola sus derechos a la vida y a la salud al imponérsele la carga de costearse su estadía en la *casa de recuperación* de Medellín, en donde se encuentra esperando a que aparezca un donante de tráquea, para, de inmediato, programar la cirugía.

10.1.2. El servicio de salud que actualmente se le brinda, se da en cumplimiento de una orden de tutela impartida por la Sala Civil del Tribunal Superior de Valledupar mediante sentencia proferida el 13 de septiembre de 2005, en la cual resolvió en este fallo ordenar a la Secretaría de Salud Departamental que dentro de las 48 horas siguientes a la notificación de este fallo realice las gestiones necesarias para que se le practique la cirugía de *injerto de teflón, transplante de tráquea y retiro del respirador artificial*. El accionante señala que ha sido atendido en varios lugares del país, hasta que finalmente fue remitido a Medellín, en donde se encuentra actualmente y en donde debe permanecer para los controles médicos que se le realizan cada 8 días. Sostiene que es una persona que carece de ingresos, no tiene empleo y vive a expensas de sus padres que están en Cúcuta y también son de escasísimos recursos; está solo en la ciudad de Medellín, no tiene familia y tampoco tiene quién le ayude a costearse su estadía en la *casa de recuperación*, donde tiene que pagar diariamente quince mil pesos (\$15.000) para tener derecho a estar allí y a la alimentación. Actualmente depende de la limosna.

10.1.3. La Secretaría de Salud Departamental de Valledupar participó en el proceso para señalar con respecto a la petición del accionante, luego de advertir que se le ha garantizado la prestación de los servicios de salud que ha requerido, que “(...) *la competencia de los entes territoriales en salud, como*

*lo dispone la Ley 100 de 1993 y la Ley 715 de 2001, garantizan la atención en salud a la población pobre y vulnerable subsidiada en Evento NO POS-S más no gastos personales como alimentación y sostenimiento las cuales (sic) deben ser sufragados por el paciente o familiares en su ciudad de origen. La Ley 100 de 1993 en su artículo 9° habla sobre los destinos de los recursos en salud, los cuales serán únicamente para la atención integral en diagnóstico, tratamiento y rehabilitación de la salud. El uso de destino diferente a estos recursos, debe considerarse como peculado por apropiación oficial diferente, artículo 399 Código Penal.”*

## **10.2. Decisión de primera instancia**

El 3 de febrero de 2006, el Juzgado Primero de Menores de Medellín resolvió tutelar los derechos del accionante, por considerar que “[s]i bien es cierto, en cumplimiento del fallo de tutela proferido por el H. Tribunal Superior del Distrito Judicial de Valledupar, se le viene prestando, por cuenta de la Secretaría de Salud Departamental del César, la atención integral que sus quebrantos de salud exigen, no es razón para que se acepte el *abandono* a que ha sometido el ente departamental al paciente. La integralidad en la prestación del servicio médico-especializado exige también garantizar la estadía y manutención en el centro que tiene a su cargo los cuidados del paciente.” Para el Juez era necesario pronunciarse porque la orden del Tribunal Superior ordenó las ‘gestiones necesarias’ para la práctica del transplante, afirmación de la cual no puede inferirse que se encuentre expresamente determinada la obligación de la entidad de asumir los costos de su estadía del afectado en la ciudad de Medellín mientras dure su tratamiento, es que motiva de este Despacho una determinación expresa en ese sentido. El Juez ordenó a la Secretaría de Salud Departamental de Valledupar que autorizara y sufragara todos los costos de la estadía y manutención que demande el tratamiento integral a que debe someterse el accionante en la ciudad de Medellín, como consecuencia del transplante de tráquea a que debe someterse.

## **10.3. Decisión de segunda instancia**

El 24 de marzo de 2006, la Sala Primera de Familia del Tribunal Superior de Medellín resolvió revocar el fallo de primera instancia, por considerar que la entidad acusada no ha violado los derechos a la vida y a la salud del accionante. Para la Sala del Tribunal, la Dirección Seccional de Salud de Valledupar no tiene legalmente la obligación de asumir los costos de estancia y alimentación, por fuera de la Institución Prestadora de Servicios de Salud, IPS, con la que la entidad territorial contrató, pues no están contemplados para ninguno de los regímenes de salud, el contributivo y el subsidiado.

## **10.4. Medida cautelar adoptada por la Sala**

10.4.1. Teniendo en cuenta la jurisprudencia sobre acceso a los servicios de salud para personas vinculadas al Sistema de Salud, en especial, por fuera de su domicilio, la Sala de Revisión, mediante Auto de 22 de agosto de 2006,

adoptó como medida cautelar ordenar a la Secretaría de Salud del Departamento del Cesar, que dentro de las 48 horas siguientes, brindara al señor Mario Reyes Acevedo los medios económicos suficientes o realizar acuerdos con entidades públicas o privadas de la ciudad de Medellín, para costear su traslado y manutención, con el objeto de que continuara recibiendo el tratamiento que requiere en el Hospital Universitario San Vicente de Paúl. Se ordenó remitir copia de la decisión al Hospital.

10.4.2. La encargada del Hogar de Recuperación *San Antonio*, Silvia María Caro Úsuga, informó que el paciente ya había sido intervenido y que actualmente se encontraba en estado de recuperación. Dijo al respecto, en comunicación del 8 de septiembre de 2006,

*“El Señor Mario Reyes Acevedo (...) se alojó en este hogar de recuperación desde el 8 de noviembre de 2005 hasta el 24 de enero de 2006, fecha en la cual fue trasplantado de tráquea en el Hospital San Vicente de Paúl, y nuevamente ingresó al Hogar después de esta intervención al día 23 de marzo de 2006 hasta que los médicos le den de alta, dado que semanalmente tiene controles.*

*El señor Reyes Acevedo ha estado todo este tiempo en recuperación en este lugar; sin embargo, hasta el día presente no ha podido cancelar el servicio recibido, el cual debe pagarse mensualmente cada día 23, pues su situación económica es precaria.”*

10.4.3. Luego de ser requerida por la Sala de Revisión, la Secretaría de Salud del Departamento del Cesar, remitió una comunicación al Despacho informando el cumplimiento de la medida cautelar, en los siguientes términos,

*“(...) le comunicamos que esta Secretaría está dando cumplimiento a lo ordenado por esa Sala, como medida cautelar mediante auto de agosto 22 de 2006 (...) donde se nos conmina mediante providencia, se le brinde los medios económicos suficientes o realizar acuerdos con entidades públicas o privadas de la ciudad de Medellín, para costear su traslado y manutención, para que Mario Reyes, continúe recibiendo el tratamiento que requiere en el Hospital Universitario San Vicente de Paúl, le anexamos como medio probatorio la cuenta de cobro N° 19 y 20 del Hogar de recuperación San Antonio, remita (sic) por la señora Silvia María Caro Úsuga (...), con quien tenemos contratados mensualmente los servicios de enfermería, hospedaje y alimentación.”*

## **11. Expediente T-1350500 (libertad de elección y de traslado entre las**

## 11.1. Hechos

11.1.1. El 26 de enero de 2006, Jairo Eduardo Yepes Pérez, interpuso acción de tutela contra el Seguro Social EPS y Coomeva EPS por considerar que se le han violado y amenazado los derechos fundamentales a la salud y a la seguridad social, a él y a su familia. Coomeva EPS se niega a autorizar el traslado de su grupo familiar, inscrito actualmente en el Seguro Social EPS, pues considera que de acuerdo a la regulación (numeral 9°, artículo 14, Decreto 1485 de 1994), el tipo de afectación a la salud que padece su hijo (una enfermedad de alto costo, sujeta a períodos mínimos de cotización), implica que su derecho a escoger libremente la entidad que preste el servicio de salud está limitado, salvo mala prestación del servicio, ‘por lo menos dos años después de culminado el tratamiento en la respectiva Entidad Promotora de Salud’. Relata así los hechos el accionante,

*“Estoy afiliado a la EPS ISS pero ante la pésima atención de esta entidad de seguridad social hacia sus afiliados, opté por mi traslado de esa EPS hacia la de Coomeva, con todo mi grupo familiar que está compuesto por mi hijo Francisco Javier y mi esposa Carmen Rosa López. Para ello me puse en contacto con la asesora comercial de la empresa promotora la señora María Adelaida Hermida Rodríguez, quien procedió a diligenciar el formulario de afiliación respectivo con los datos indispensables. También solicitó las constancias y certificaciones correspondientes para anexarle al formulario como las historias clínicas. Esta funcionaria de la EPS entregó esta documentación a su jefe la señora Gloria Elena Aguirre Chavarriaga para el trámite respectivo. Estos trámites se efectuaron el 28 de diciembre del año pasado.*

*Ayer, 25 de enero la señora María Adelaida Hermida se comunicó por teléfono conmigo para manifestarle que la EPS ISS no había autorizado el traslado porque el niño estaba en un tratamiento médico; pero ya hoy (26 de esta calenda) la versión varió expresándose que ellos (la EPS Coomeva) se apoyaban en el Decreto 1485 de 1994 para no darle el trámite a mi solicitud de traslado y que no tenga ninguna otra razón para darme y procedí a pedirle una copia de la planilla (entendida como el formulario de afiliación—solicitud de traslado ) y me dijo que ellos no daban copias de esos documentos por ningún motivo. Ya con esta definición, me comuniqué con la señora Gloria Elena Aguirre Cavaría (sic) quien funge en esa EPS como ejecutiva empresarial; para expresarle que yo necesitaba una copia de ese formulario de afiliación—solicitud de traslado que yo les había firmado como constancia de que ellos sí habían efectuado el trámite de traslado, a lo que ella manifestó que había conversado con la jurídica de ellos*

*y que no me daban ninguna copia de ese formulario porque era propiedad de Coomeva; y que la única respuesta que tenían para dar eran que el decreto (refiriéndose al 1485 de 1994) era muy claro en eso casos; más aún cuando eran tratamientos de drogas tan costosas; concluyendo en que no era EPS Coomeva quien negaba sino el Decreto. Ahora bien, la demandada funda su decisión arbitraria en un decreto sin tomar en cuenta que la Ley 100 de 1993 tiene como una de las normas rectoras de la Seguridad Social el que los usuarios tendrán la libertad de escogencia entre las entidades promotoras de salud y las instituciones prestadoras de salud (ver artículo 153 ordinal 4 de la Ley 100 de 1993) lo que lleva a que estas entidades tengan a su cargo la afiliación de los usuarios (literal E) del también artículo 156, ibidem) garantizando la libre escogencia y traslado entre entidades promotoras de salud (ordinal 3 correspondiente al artículo 159 ibidem) a los afiliados. Y, por si fuera poco, vale recordar el contenido del artículo 183 de la Ley 100 de 1993 en cuanto a que las entidades promotoras de salud no pueden –en forma unilateral– negar la afiliación a quien desee ingresar al régimen – comprendiendo también, la libertad de elección de EPS, salvo la mala fe o el abuso por parte del usuario, casos que no se vislumbran en este traslado de EPS.*

*(...)*

*La conducta asumida por la demandada EPS Coomeva, me cercena claros derechos fundamentales como la seguridad social y la salud, ya que no puedo acceder a esos servicios públicos, igual acontece con mi hijo y mi esposa.*

*Ahora, la EPS no puede negarse a entregar la autorización al traslado de mi grupo familiar pues llevo inscrito en esta entidad más del tiempo exigido en la normatividad que regla ese aspecto, como lo es el artículo 16 del Decreto 047 de 2000; ya que estoy afiliado a ella desde el 1 de agosto de 1997 como puede comprobarse en la copia del carné que aportó a este escrito de tutela; hecho que tampoco se puede esgrimir como justificativo para esa negativa por parte de ambas EPSs.”*

11.1.2. La EPS Coomeva participó en el presente proceso, para señalar que el señor Jairo Eduardo Yepes Pérez está afiliado al Sistema General de Seguridad Social en Salud a través del Seguro Social EPS, no de Coomeva EPS. Advierte que no le es posible atender la solicitud de traslado del accionante por cuanto en su grupo de beneficiarios se encuentra su hijo que padece de *hemofilia congénita y degenerativa*, enfermedad de “alto costo” en virtud de la cual, la reglamentación limita la libertad de escogencia. Al respecto señala,

*“De acuerdo con el Decreto 1485 [de 1994] en su artículo 14 numeral 9 se transcribe:*

*‘Artículo 14. Régimen general de la libre escogencia. El régimen de la libre escogencia estará regido por las siguientes reglas:*

*(...)*

*9. Permanencia para Atención de Servicios Sujetos a períodos Mínimos de Cotización. Una vez cumplidos los períodos mínimos de cotización, el afiliado que haga uso de los servicios organizados por las Entidades Promotoras de Salud para atender esta clase de procedimientos de alto costo sujetos a períodos mínimos de cotización, deberá permanecer, salvo mala prestación del servicio, por lo menos dos años después de culminado el tratamiento en la respectiva Entidad Promotora de Salud (...)*

*De acuerdo con la anterior disposición como el beneficiario del señor Jairo Eduardo Yepes Pérez se encuentra siendo sometido a un tratamiento de Alto Costo para la patología que padece, hemofilia congénita y degenerativa, por la EPS Seguros Sociales en la atención prestada al señor Jairo Eduardo Yepes Pérez y a su menor hijo, se de aplicación [al Decreto 047 de 2000, Artículo 9°].”*

11.1.3. El Seguro Social EPS informó al Juez de tutela que no ha recibido solicitud alguna de traslado por parte de alguna otra EPS. A su parecer “(...) la EPS ISS no ha vulnerado ó amenazado los derechos constitucionales del accionante y es la EPS Coomeva quien lo hace al no dar la oportunidad de la libre elección de Entidad Promotora de Salud.”

## **11.2. Decisión de primera instancia**

El 20 de febrero de 2006, el Juzgado Segundo Civil del Circuito de Medellín resolvió negar la acción de tutela por considerar que ninguna de las entidades ha desconocido los derechos a la salud y a la vida del accionante o de su grupo familiar. Considera que el Seguro Social EPS no ha negado el derecho al accionante para trasladarse, puesto que se trata de un trámite interno entre distintas EPS, que no ha sido solicitado, y que Coomeva EPS tampoco ha negado el derecho a la libre escogencia, porque la reglamentación lo limita en caso de pacientes que requieren procedimientos de alto costo sometidos a períodos mínimos de cotización, hasta dos años después de “*cumplido el tratamiento*”, “*salvo se pruebe una mala prestación del servicio de salud*”, lo que considera, no aparece demostrado en el proceso.

## **11.3. Decisión de segunda instancia**

El 13 de marzo de 2006, la Sala Octava de Decisión Civil del Tribunal Superior de Medellín, resolvió confirmar la sentencia del Juzgado de primera

instancia. El Tribunal consideró que “[n]i del escrito de tutela, ni de la impugnación se desprende una reclamación por la vulneración directa de alguno de los derechos considerado como fundamental por la Constitución Política de 1991, ni de ninguno de los considerados como fundamentales por conexidad. [...] frente a la mala prestación del servicio de salud por parte de la EPS, si bien se alega en términos generales, en ningún momento se afirma que al hijo del actor se le haya negado algún tipo de procedimiento o medicamento; pues no es cierto, como lo afirma el impugnante, que la mala atención en la EPS del Seguro Social sea un hecho notorio, pues si bien se trata de la EPS frente a la cual se instaura el mayor número de tutelas, también lo es que se trata de la EPS con más afiliados, y muchos hablan bien de ella, especialmente cuando de tratamientos o procedimientos de alto costo o complejidad se trata.”

#### **11.4. Medida cautelar adoptada por la Sala Tercera de Revisión**

11.4.1. La Sala Tercera de Revisión de la Corte Constitucional, considerando (i) el carácter fundamental de los derechos de los niños, (ii) la reglamentación aplicable, (iii) la jurisprudencia constitucional, (iv) los hechos del caso concreto, y (v) las facultades de adoptar medidas cautelares, resolvió ordenar a Coomeva EPS que “afilie al señor Jairo Eduardo Yepes Pérez y a su grupo familiar, si aún no lo ha hecho y si éste sigue siendo el deseo del señor Yepes Pérez y su familia.”

11.4.2. Coomeva EPS indicó que había informado a la cónyuge del señor Yepes Pérez que en cualquier momento, si era su deseo, sería afiliado.

11.4.3. En su comunicación, sin embargo, la EPS reiteró su posición según la cual no desconoce los derechos constitucionales del señor Yepes Pérez y su grupo familiar, en especial los de su hijo, de carácter fundamental, fundándose únicamente en disposiciones reglamentarias. Señala la EPS,

*“De acuerdo con el Decreto 1485 en su artículo 14 numeral 9 se transcribe:*

Artículo 14. Régimen general de la libre escogencia.

*‘Permanencia para Atención de Servicios Sujetos a Períodos Mínimos de Cotización. Una vez cumplidos los períodos mínimos de cotización, el afiliado que haga uso de los servicios organizados por las Entidades Promotoras de Salud para atender esta clase de procedimientos de alto costo sujetos a períodos mínimos de cotización, deberá permanecer, salvo mala prestación del servicio, por lo menos dos años después de culminado el tratamiento en la respectiva entidad promotora de salud. (...)’*

*De acuerdo con la anterior disposición como el beneficiario del señor Jairo Eduardo Yepes Pérez se encuentra siendo sometido a un tratamiento de alto costo para la patología que padece, hemofilia congénita y degenerativa, por la EPS Seguros Sociales, razón por la cual debe permanecer allí por lo meno[s] dos años, salvo se pruebe la mala prestación en el servido. Es decir Coomeva EPS en aplicación de la anterior disposición somete el traslado del señor Jairo Eduardo Yepes Pérez a las condiciones que impone la anterior disposición.”*

## **12. Expediente T-1645295 (reglas de recobro)**

### **12.1. Hechos y solicitud**

12.1.1. La EPS Sanitas SA, por medio de apoderado, presentó acción de tutela en contra de la Sala Administrativa del Consejo Superior de la Judicatura por violar el derecho de petición consagrado en el artículo 23 de la Constitución Política al no haberle dado respuesta de fondo, integral y efectiva a dos comunicaciones que le fueron dirigidas por la EPS el 18 de diciembre de 2006 y el 18 de enero de 2007.

*“EPS Sanitas, en ejercicio legítimo del derecho de petición consagrado en el artículo 23 de la Constitución Nacional, ha radicado dos (2) escritos petitorios encaminados a obtener por parte de la Sala Administrativa del Consejo Superior de la Judicatura, la expedición de un instructivo con destino a los jueces de tutela, como respuesta de fondo, integral y efectiva a una serie de interrogantes que tienen su origen en la actual reglamentación expedida por el Ministerio de la Protección Social en materia de los requisitos exigidos para presentar las solicitudes de recobro ante el Consorcio Fidufosyga 2005, en su calidad de administrador de los recursos del Fosyga, por concepto de aquellos medicamentos y servicios que, no obstante encontrarse excluidos del Plan Obligatorio de Salud (POS) deben ser entregados por las Entidades Promotoras de Salud-EPS a sus afiliados en virtud de (a) fallos de tutela y (b) conceptos de los denominados Comités Técnico Científicos (CTCs). Las normas pertinentes contemplan la posibilidad de que las Entidades Promotoras de Salud recobren al Fosyga el valor de los procedimientos y medicamentos que hayan suministrado, con exorbitancia de su ámbito de responsabilidad, en virtud de los fallos de tutela y de los dictámenes de los CTCs, previo cumplimiento del procedimiento fijado por el Ministerio de la Protección Social.”*

En las comunicaciones dirigidas por la EPS al Consejo Superior de la Judicatura, se sostenía que la petición requerida se fundaba en el hecho de que “[...] uno de los requisitos establecidos por la Resolución 3797 de 2004 y la

*Resolución 2933 de 2006 para presentar en debida forma las solicitudes de recobro ante el Consorcio Fidufosyga 2005, es la presentación de la primera copia del fallo de tutela que ordenó la entrega del medicamento o la presentación del servicio, con constancia de ejecutoria.”* Por tanto, para terminar el recobro correspondiente ante el Fosyga, y obtener el reembolso de las sumas pagadas en virtud de fallos de tutela, las EPS deben presentar ante el administrador fiduciario del Fosyga una solicitud que debe cumplir con todos los requisitos señalados por el artículo 11 de la citada resolución. Para que el recobro sea reconocido y pagado por el Fosyga a las EPS, la solicitud de recobro debe contener, entre otros requisitos, la primera copia del fallo de tutela con constancia de ejecutoria. Al respecto, el apoderado de la EPS dice lo siguiente,

*“La consecución de la constancia de ejecutoria no es un trámite de fácil realización, porque las dependencias judiciales que actúan como jueces de tutela interpretan de diversa forma el término de ejecutoria del fallo. Para un número importante de jueces, en virtud de una interpretación legal equivocada, la ejecutoria sólo se presenta cuando la Sala de Selección de la Corte Constitucional ha tomado su decisión de revisar o no revisar un fallo determinado y la misma Corte se manifiesta en relación con dicho fallo o remite el expediente al juez de primera instancia. Esa equivocada interpretación, unida al término perentorio que tiene una EPS para tramitar la solicitud de recobro ante el Fosyga, ha generado la imposibilidad para que las EPS obtengan el reembolso de los valores a que justamente tiene derecho.*

*Dado (i) el hecho de que la normativa vigente ha establecido términos perentorios para que la EPS tramite las solicitudes de recobro ante el Fosyga por la vía administrativa y (ii) la disparidad de criterio que existe entre las dependencias judiciales sobre el momento procesal en el cual un fallo de tutela se encuentra debidamente ejecutoriado, se presentan muchos inconvenientes para las EPS que enfrentan trabas injustificadas para el ejercicio de su derecho legal de recobrar las sumas que éstas han pagado con exorbitancia de su órbita de responsabilidad.*

*Teniendo en cuenta (i) el vacío normativo que existe sobre el momento en el cual se deben considerar ejecutoriadas las sentencias de tutela y (ii) las amplias facultades conferidas por la Constitución y la ley a la Sala Administrativa del Consejo Superior de la Judicatura para que dicte los reglamentos necesarios para el eficaz funcionamiento de la administración de justicia y para regular los trámites judiciales y administrativos que se adelanten en los despachos judiciales, EPS Sanitas presentó (2) dos derechos de petición mediante los cuales se solicitó a la Sala Administrativa del Consejo Superior de la Judicatura que expidiera un instructivo con destino a los jueces de tutela, en el cual definiera el alcance del*

*término ‘ejecutoria’ para los fallos de tutela y ordenara a los funcionarios responsables de la expedición de las constancias, a solicitud de los interesados, en cualquier momento a partir de la fecha en que verdaderamente quedan ejecutoriados, absteniéndose de esa manera de continuar con la práctica de esperar la decisión de la Sala de Selección de Tutelas de la Corte Constitucional.*

*La presente acción de tutela encuentra su fundamento en las comunicaciones insuficientes y contradictorias que, como solución al problema planteado, ha proferido la Sala Administrativa del Consejo Superior de la Judicatura. En ese orden de ideas, se hace indispensable un pronunciamiento judicial que le ordene a la accionada la contestación inmediata y efectiva de las peticiones planteadas, por cuanto la falta de una respuesta adecuada constituye una violación flagrante que hace nugatorio el derecho fundamental que le asiste a EPS Sanitas de presentar peticiones respetuosas a las autoridades y a que éstas sean resueltas de fondo, de manera integral y de forma oportuna.”*

Para el apoderado de Sanitas EPS, del artículo 32 del Decreto 2591 de 1991, que regula el trámite de la impugnación, se concluye que la revisión de los fallos de tutela no constituye una instancia jurídico-procesal que impida la ejecutoria del fallo. A su juicio “(...) *de la sana interpretación del artículo (...) hay que concluir que el fallo de tutela queda ejecutoriado (i) cuando transcurren tres (3) días desde que se profiere sentencia de segunda instancia –sede de impugnación–, o (ii) cuando transcurran más de tres (3) días desde su notificación sin que se impugne la decisión de primera instancia.*”

12.1.2. De acuerdo con el apoderado de la EPS, el 27 de diciembre de 2006, la Coordinación de Asuntos Internacionales y Asesoría para la Rama Judicial de la Presidencia de la Sala Administrativa del Consejo Superior de la Judicatura respondió inadecuadamente la primera petición presentada por la EPS (el 18 de diciembre de 2006), al limitarse a responder en los siguientes términos:

*“Al respecto, me permito informarle que esta Corporación no está facultada legal o constitucionalmente para intervenir en las decisiones de los funcionarios judiciales que se enmarquen dentro del fuero jurisdiccional, ya que los mismos son autónomos en sus decisiones, tal como lo establece el artículo 228 de la Constitución Política y artículo 5 de la Ley 270 de 1996.”*

12.1.3. Sanitas EPS insistió en su petición, por considerar que la respuesta había sido inadecuada, al no tratar la cuestión de fondo planteada, ni dar una solución efectiva de la misma de acuerdo a como lo ha señalado la jurisprudencia constitucional. La EPS también alegó que sí era función del Consejo Superior atender la solicitud propuesta, en la medida en que de acuerdo con la Ley 270 de 1996 (art. 85), corresponde a la Sala Administrativa del Consejo de la Judicatura, entre otras funciones, (13) ‘regular los trámites

judiciales y administrativos que se adelanten en los despachos judiciales, en los aspectos no previstos por el legislador’. En la insistencia de su petición, la EPS indicó que la “(...) petición formulada busca precisamente que mediante el ejercicio de esa facultad se precise y se defina el alcance del término ‘ejecutoria’, de manera que exista un entendimiento uniforme, claro y sistemático por parte de los funcionarios de la rama jurisdiccional que les permita, por demás, a los agentes privados del Sistema General de Seguridad Social en Salud el ejercicio de sus derechos.”

12.1.4. Luego de indicar que la solicitud se encontraba en trámite (en comunicación fechada 7 de febrero de 2007), el 23 de febrero del mismo año, la Coordinación de Asuntos Internacionales y Asesoría Jurídica para la Rama Judicial respondió a Sanitas EPS que la Corporación carecía de competencia para resolver la cuestión propuesta por él, la cual, de acuerdo con la jurisprudencia constitucional, corresponde al legislador.

12.1.5. El 16 de febrero de 2007, el Presidente de la Corte Constitucional, Magistrado Rodrigo Escobar Gil también consideró que a la Corporación que preside le es imposible responder de fondo la solicitud presentada, por cuanto carece de competencia para ello. Dijo al respecto lo siguiente,

*“(...) me permito informarle que, de acuerdo con lo preceptuado en los artículos 86 y 241 de la Constitución Política, la Corte Constitucional solo puede proferir sentencias de constitucionalidad o de revisión de tutelas en los casos y con los requisitos señalados por la Carta Política y la ley. Por lo mismo, no se encuentra dentro de las funciones de esta Corporación, y por ende de los Magistrados que la integran, intervenir en asuntos como el que Usted plantea. En consecuencia no es posible absolver su petición.”*

12.1.6. Para el apoderado de Sanitas EPS, la respuesta de la Corte Constitucional es adecuada, por cuanto no es competencia de esta Corporación, sino del Consejo Superior de la Judicatura, resolver la petición presentada. Para el apoderado, el Consejo empleó inadecuadamente la jurisprudencia constitucional, con base en la cual pretende justificar su incompetencia. Dice al respecto,

*“Se debe resaltar que la jurisprudencia citada por la Sala Administrativa del Consejo Superior de la Judicatura, de ninguna manera puede ser invocada para excusar su obligación de dar una respuesta de fondo a la petición planteada toda vez que, de conformidad con las solicitudes contenidas en los escritos petitorios radicados por EPS Sanitas, lo que se ha solicitado a la corporación accionada es precisamente el ejercicio de una labor administrativa que en nada afecta las decisiones, autónomas e independientes que debe poder emitir toda autoridad judicial en ejercicio de sus funciones jurisdiccionales.”*

También advierte el apoderado que en la fecha de la presentación de la acción de tutela, inclusive, no se había recibido una respuesta de fondo, integral ni efectiva a ninguno de los derechos de petición y requerimientos interpuestos ante la Sala Administrativa del consejo Superior de la Judicatura y, por tanto, alega, se ha configurado una violación manifiesta del derecho de petición de la EPS.

12.1.7. En la acción de tutela, Sanitas EPS reitera que el Consejo Superior de la Judicatura sí es la entidad competente para absolver la petición presentada (expedir un reglamento respecto a cuándo se ha de entender ‘ejecutoriado’ un fallo de tutela). Fundándose en el artículo 85, numeral 13, de la Ley 270 de 1996, presenta su posición en los siguientes términos,

*“(…) resulta clara la función que le asiste a la Sala Administrativa del Consejo Superior de la Judicatura de regular todos aquellos trámites que se surtan en los despachos judiciales, bien sean de índole judicial o administrativa, en todos aquellos aspectos que no hayan sido previstos expresamente por el legislador. La petición formulada busca precisamente que, mediante el ejercicio de esa facultad, se precise y se defina el alcance del término ‘ejecutoria’ en los fallos de tutela, de manera que exista un entendimiento claro, sistemático y uniforme por parte de los funcionarios de la rama que les permita, por demás, el ejercicio de sus derechos a los agentes privados del Sistema General de Seguridad Social en Salud.*

[...]

*La expedición de un instructivo encaminado a solicitarle a los jueces que se atienda correctamente el alcance del término ‘ejecutoria’ para los fallos de tutela y se ordene a los funcionarios responsables de la expedición de constancias de ejecutoria de fallos de tutela, la entrega de dichas constancias, a solicitud de los interesados, en cualquier momento a partir de la fecha en que verdaderamente quedan ejecutoriados y que se abstengan de continuar con la práctica de esperar la decisión de la Sala de Selección de tutelas de la Corte Constitucional, de ninguna manera se puede considerar como un acto que interfiera en la autonomía de la Rama Judicial en su función de administrar justicia.*

*La expedición del instructivo, con la correspondiente unificación de criterios para las solicitudes de copias de fallos por parte de los usuarios del sistema judicial, implica la regulación de un procedimiento que no ha sido reglado por el legislador y que genera, en virtud de dicho vacío normativo, una ineficiencia generalizada en la administración de justicia que por ser fuente generadora de perjuicios a los particulares, debe ser corregida por el órgano competente en materia de organización y dirección de la Rama Judicial.”*

12.1.8. El 20 de marzo de 2007, el Presidente de la Sala Administrativa del Consejo Superior de la Judicatura, Hernando Torres Corredor, remitió un escrito al juez de primera instancia –el Tribunal Superior de Bogotá, Sala Civil–, indicando que las funciones propias de la Corporación se han cumplido cabalmente, puesto que se ha atendido de forma adecuada y como corresponde, las peticiones presentadas por Sanitas EPS. Señaló al respecto lo siguiente,

*“La Sala Administrativa del Consejo Superior de la Judicatura en ningún momento desatendió las peticiones del solicitante, otra cosa diferente es que (...) las respuestas dadas no hayan colmado las aspiraciones del peticionario.*

*La Sala, conforme a su organización interna, asignó a la Oficina de Coordinación de Asuntos Internacionales y Asesoría Jurídica el trámite de algunos asuntos, como la petición que dio lugar a esa acción.”*

Luego de indicar que sí se dieron tres respuestas a las peticiones presentadas por la entidad accionante, advierte que éstas también fueron adecuadas en cuanto a lo que a su contenido se refiere. Dijo al respecto,

*“Si bien su contenido no cumplió con las expectativas que añoraba el accionante, no por ello debe entenderse que fueron desatendidas. Igualmente ha de señalarse que por el hecho de ser concretas no significa que sean incompletas.*

*En efecto, en una y otra oportunidad lo que se quiso, y así se hizo, fue manifestar al peticionario que la Sala Administrativa del Consejo Superior de la Judicatura no cuenta con las facultades para atender a sus requerimientos.*

*Es por ello que se invocaron los artículos 228 de la Constitución Nacional y 5 de la Ley Estatutaria de la Administración de Justicia (Ley 270 de 1996), pues en virtud a la independencia y autonomía de los jueces, la Sala Administrativa no puede imponerles a dichos funcionarios criterios de interpretación, ni impartirles instrucciones respecto de los asuntos sometidos al ejercicio de sus propias competencias.*

*Porque si bien para el peticionario el expedir un instructivo que señale, lo que según él, debe entenderse como la ejecutoria de una providencia, es una simple cuestión de carácter administrativo, para la Sala ello comporta una indebida intromisión en el libre ejercicio de las atribuciones que a los jueces corresponde.*

*Tan no es el instructivo pedido una simple cuestión de carácter*

*administrativo, que el mismo accionante en varios apartes de su escrito, cuando hace referencia al problema planteado, indica que tiene que ver con la forma como los jueces interpretan el concepto de ejecutoria frente a las providencias judiciales.”*

## **12.2. Decisión de primera instancia**

12.2.1. El 28 de marzo de 2007, la Sala Civil del Tribunal Superior de Bogotá resolvió negar la tutela en cuestión, por considerar que la Corporación judicial accionada no ha violado el derecho de petición del accionante. A su parecer las peticiones sí han obtenido respuesta, adecuada a la luz del ordenamiento vigente. Para el Tribunal Superior de Bogotá, las respuestas de la Sala Administrativa a las peticiones presentadas por Sanitas EPS no desconocen el derecho de petición, en los términos en que ha sido entendido por la jurisprudencia constitucional. Dijo al respecto la sentencia,

*“La respuesta anterior, aunque concisa, contiene un pronunciamiento de fondo por parte de la Corporación accionada, en la que informa de manera clara y precisa no estar facultada para acceder a lo solicitado, la cual es congruente con la petición, ya que efectivamente es contestataria de lo pedido, quizá no acorde con las expectativas de la entidad petente, pero no por ello constituye por sí solo violación al derecho fundamental de petición.”*

12.2.2. Para la Sala del Tribunal Superior, además, la respuesta de fondo de la Sala Administrativa del Consejo Superior de la Judicatura se ajusta a derecho y es adecuada. Al respecto señala,

*“(…) si los escritos petitorios no buscan nada distinto a un instructivo para los Jueces de la República sobre el alcance del concepto de ejecutoria de los fallos de acciones de tutela, es palmario que conforme a los artículos 228 y 230 de la Carta Política, la administración de justicia es una función pública, independiente, autónoma y desconcentrada y los jueces solo están sometidos al imperio de la ley, por lo mismo, la respuesta dada por la entidad accionada no podía ser diferente, dado que en esa función pública no puede existir ninguna clase de interferencia por parte de otros órganos judiciales.”*

12.2.3. No obstante, el Tribunal Superior de Bogotá consideró que la respuesta del 7 de febrero de 2007 de la Sala Administrativa del Consejo Superior de la Judicatura, mediante la cual indicó que la “(…) solicitud se encuentra en estudio para posterior consideración”, no respeta cabalmente el derecho de petición de Sanitas EPS, por constituir una actitud dilatoria. No obstante, por tratarse de una respuesta intermedia, que finalmente fue atendida de fondo adecuadamente, la Sala del Tribunal consideró que la tutela no se debía conceder.

12.2.4. Sanitas EPS impugnó la decisión, por considerar que las respuestas de la Sala Administrativa del Consejo Superior de la Judicatura sí desconocen su derecho de petición, en la medida en que no atienden de forma suficiente el fondo de la cuestión propuesta. Al respecto indicó su apoderado,

*“(...) la mera transcripción de normas y jurisprudencia no constituye una respuesta de fondo ni suficiente porque no profundiza ni desarrolla el tema que se ha planteado, como es el de la expedición, por parte de la Sala Administrativa del Consejo Superior de la Judicatura, de un instructivo que ilustra a los jueces de la República sobre el alcance del concepto de ejecutoria para los fallos de tutela. Cabe resaltar, además, la impertinencia de la respuesta, pues es claro que lo que se solicitaba en los escritos petitorios no era la injerencia de la Sala Administrativa en las providencias judiciales de tutela, sino la expedición de un instructivo que precisara de manera universal, y con base en las normas vigentes, el momento procesal en que se considera ejecutoriado un fallo de tutela. Es decir, en tanto que lo que se pedía era precisar y delimitar un término procesal con fundamento en normas pre-existentes pero confusas, no era posible concluir que se pedía interferir en las decisiones autónomas de los jueces, para contestar que no le está permitida tal injerencia a la entidad accionada.”*

Para Sanitas EPS, la posición de la Sala del Tribunal se debe a una confusión entre la petición presentada y la respuesta que, a su juicio, se le debía dar. Al respecto señala el apoderado de la EPS,

*“La confusión de la Sala Civil del Tribunal Superior de Bogotá puede residir en el hecho de que una resolución de fondo, que es lo que se pide tutelar, terminaría por evidenciar la necesidad de acceder favorablemente al contenido de la petición, que no es lo mismo que tutelar el derecho a lo pedido. En efecto, si se hace un análisis juicioso de las solicitudes que mi poderdante elevó a la entidad accionada, imperiosamente se ha de concluir que le asiste toda la razón y no quedaría otro camino que el de acceder a su petición y expedir el tantas veces nombrado instructivo sobre el momento procesal en que un fallo de tutela queda ejecutoriado.*

*De acuerdo con la sana interpretación de las normas que regulan sus funciones y competencias, se impone concluir que la Sala Administrativa del Consejo Superior de la Judicatura sí tiene amplias facultades constitucionales y legales para regular trámites judiciales. Así mismo, si se revisa el texto de las solicitudes que EPS Sanitas elevó ante dicha corporación, se puede verificar que lo solicitado es precisamente la regulación de un trámite judicial, previa precisión del momento en que, de acuerdo con las normas*

*pertinentes, un fallo de tutela que ejecutoriado. En ese sentido, responder que la entidad accionada no tiene las facultades para expedir el instructivo solicitado –dando como argumento la simple transcripción de dos normas y los apartes de una sentencia que no corresponden a lo solicitado y sin entrar a realizar un análisis juicioso de fondo– no puede constituirse en una contestación adecuada al derecho de petición.”*

### **12.3. Decisión de segunda instancia**

El 15 de mayo de 2007, la Sala Civil de la Corte Suprema de Justicia confirmó la decisión de negar la acción de tutela presentada por Sanitas EPS, por considerar que la Sala Administrativa del Consejo Superior de la Judicatura no violó su derecho de petición. Las razones en las que fundó su posición la Sala de la Corte fueron las siguientes,

*“De lo expuesto por la propia querellante y de lo que aflora de la documentación adosada al trámite, al margen y con total prescindencia de la interpretaciones y del alcance que pueda entender la quejosa en punto al núcleo esencial de la prerrogativa fundamental prevista en el artículo 23 de la Constitución Política, se colige que la accionada ciertamente dio respuesta a la peticiones formuladas y si bien es cierto que el sentido de las decisiones adoptadas por los funcionarios encargados, no colma o satisface el propósito central de ellas, esto es, le resultó adversa a sus finalidades, lo cierto es que como lo historió el Tribunal, en puridad, la administración se pronunció en el referido sentido.*

*De suerte que si la destinataria de las peticiones de marras, le hizo saber a la EPS interesada, en forma clara y concisa, que existen principios y reglas que le impedían expedir el ‘instructivo’ reclamado, vale decir, que no estaba facultada para acceder a ello, la inconformidad frente a esa puntual actitud, se revela extraña a la temática que gobierna la Carta Política en punto al acotado derecho fundamental.*

*Así las cosas, no se abre paso la protección reclamada pues, se reitera, que la promotora de la acción tutelar, desde su presentación, admitió haber recibido respuestas a sus solicitudes, toda vez que, ‘el juez constitucional, como en repetidas ocasiones se ha dicho, no puede desplegar un especial y detallado análisis en su actividad orientada a proteger el apuntado artículo 23’ (sentencia de 27 de octubre de 2004, exp. 00694).”*

## **13. Expediente T-1646086 (reglas de recobro)**

### **13.1. Hechos y solicitud**

El 14 de marzo de 2007, Sanitas EPS, por medio de apoderado, presentó acción de tutela contra el Ministerio de la Protección Social, ante el Tribunal Superior de Bogotá, por considerar que esta entidad le ha violado su derecho de petición al no haberle dado respuesta al escrito petitorio que había sido presentado días antes, el 6 de febrero del mismo año. Solicitaba que se ordenara al Ministerio responder de fondo y adecuadamente la petición presentada.

13.1.1. En ejercicio de su derecho de petición, el de febrero de 2007 Sanitas EPS pidió por escrito al Ministerio de la Protección Social que simplificara el procedimiento de presentación de solicitudes de recobro ante el Fosyga originadas en fallos de tutela, eliminando los formalismos como presentar copia del fallo de tutela con constancia de ejecutoria. La petición presentada, señaló Sanitas EPS en la acción de tutela, se fundaba en las siguientes consideraciones,

*“Las normas actualmente vigentes contemplan la posibilidad de que las EPS recobren al Fosyga el valor de los medicamentos y procedimientos que hayan suministrado, con exorbitancia de su ámbito de responsabilidad, en virtud de los fallos de tutela, previo cumplimiento del procedimiento fijado para el efecto por el Ministerio de la Protección Social.*

*(...) uno de los formalismos establecidos por la Resolución 3797 de 2004 y la Resolución 2933 de 2006 para presentar en debida forma las solicitudes de recobro ante el Fosyga, es la presentación de la primera copia del fallo de tutela que ordenó la entrega del medicamento o la presentación del servicio, con constancia de ejecutoria.*

*Dado (i) el hecho de que la normativa vigente ha establecido términos perentorios para que la EPS tramite las solicitudes de recobro ante el Fosyga por vía administrativa, (ii) que el formalismo excesivamente gravoso de presentar la primera copia del fallo de tutela con constancia de ejecutoria se convierte en una tara de orden reglamentario que dificulta de forma excesiva el cumplimiento de los requisitos exigidos para presentar las solicitudes de recobro y (iii) la disparidad de criterio que existe entre las dependencias judiciales sobre el momento procesal en el cual un fallo de tutela se encuentra debidamente ejecutoriado, se presentan muchos inconvenientes para las EPS que enfrentan trabas injustificadas para el ejercicio de su derecho legal de recobrar las sumas que han pagado con exorbitancia de su ámbito de responsabilidad.*

[...]

*Teniendo en cuenta la dificultad que tienen las EPS para poder*

*aportar de forma expedita la primera copia del fallo de tutela con constancia de ejecutoria, con miras a ejercer su derecho legal de presentar ante el Fosyga la solicitud de recobro por haber asumido de manera temporal erogaciones que se encuentran excluidas del POS, se hace necesario que el Ministerio de la Protección Social (i) simplifique el proceso de presentación de las solicitudes de recobro exigiendo requisitos menos onerosos para su presentación y/o (ii) complemente al reglamentación actual acogiendo el alcance del término ‘ejecutoria’ para los fallos de tutela en el sentido de que éste se entienda surtido cuando transcurren tres (3) días desde (a) su notificación, sin que se impugne la decisión de primera instancia, o (b) que se profiera sentencia de segunda instancia, tal como lo ha señalado de manera expresa el artículo 32 del Decreto 2591 de 1991.”*

13.1.2. El 27 de febrero de 2007, Sanitas EPS recibió copia de una ‘nota interna’ del Ministerio de la Protección Social, dirigida por la Directora General de Financiamiento de esa entidad, Esperanza Giraldo Muñoz, a la Jefe de la Oficina Asesora Jurídica y de Apoyo al Legislativo de la misma entidad, Nelly Patricia Ramos Hernández, con el objeto de trasladarle el asunto ‘*a fin de que se conceptúe al respecto*’, dándole argumentos orientados a desestimar la petición presentada. La nota interna del Ministerio señala lo siguiente,

*“En cumplimiento del Decreto 205 de 2003, me permito trasladarle el asunto de la referencia, mediante el cual solicita ‘se suprima y en subsidio se reglamente el requisito especial para la solicitud de recobros por fallos de tutela consistente en la presentación de la primera copia del fallo de tutela con constancia de ejecutoria’, a fin de que se conceptúe al respecto. De su respuesta solicito se allegue copia a esta Dirección.*

*Sin perjuicio de lo anterior, me permito manifestarle que de tiempo atrás, desde la vigencia de las Resoluciones 2949 de 2003 y 3797 de 2004 con fundamento en la normatividad vigente, se ha exigido por este Ministerio para la solicitud de recobros originados en fallos de tutela la primera copia del fallo con constancia de ejecutoria. [...]*

*Si bien los fallos de tutela no constituyen una condena en contra del Fondo de Solidaridad y Garantía, Fosyga, puesto que en el ejercicio de la acción constitucional de tutela, a diferencia de las acciones ante la jurisdicción ordinaria o ante la jurisdicción contenciosa administrativa, no se constituye un litisconsorcio necesario, en razón a que la entidad condenada a la protección del derecho fundamental a la salud en conexión con el derecho a la vida es la entidad promotora de salud y no el Fosyga; la facultad de repetición, repetición que difiere la acción de repetición que regula el artículo 78 del Código Contencioso Administrativo, de la*

*acción de repetición ordinaria o de repetición propiamente dicha, definida en el artículo 2° de la Ley 678 de 2001, por lo tanto, solo puede entenderse como facultativa u opcional de la entidad a quien se le otorga el derecho, es claro que si la entidad condenada (EPS) lo ejerce, debe sujetarse al cumplimiento de los artículos 176 y 177 del Código Contencioso Administrativo y de los Decretos 768 de 1993 y 818 de 1994, que disponen la presentación de la ‘Primera copia auténtica de la respectiva sentencia con la constancia de notificación y fecha de ejecutoria’ para efecto del pago de obligaciones dinerarias a cargo de la Nación.*

*Tal exigencia deriva del principio presupuestal de legalidad del gasto, según el cual, no podrán autorizarse gastos que no corresponden a créditos judicialmente reconocidos, habida cuenta que los recursos del Sistema General de Seguridad Social en Salud no pueden destinarse ni utilizarse para fines distintos y respecto de los cuales conforme a lo indicado en el citado Decreto Ley 1281 de 2002, deben protegerse con el único objeto de evitar pagos de lo no debido.*

*Así las cosas, este Ministerio no está desconociendo como lo afirma el peticionario los principios constitucionales de celeridad y eficiencia por exigir la primera copia del fallo de tutela con constancia de ejecutoria.”*

Finalmente, la nota interna advierte que el Ministerio “no es el competente para reglamentar este tema en particular, tema expresamente regulado por el Código de Procedimiento Civil.”

13.1.3. El apoderado de la accionante sostiene que hasta la fecha de presentación de la presente acción de tutela no se había recibido respuesta alguna al derecho de petición, aparte de la copia de la nota interna, la cual, a su juicio, no constituye una respuesta a su derecho de petición. Al respecto señala,

*“Sobra advertir que la nota interna a la cual se ha hecho referencia, no constituye de ninguna manera una respuesta al derecho de petición planteado, por cuanto no cumple con ninguna de las exigencias que han señalado (i) la Constitución Política, (ii) la normas de orden legal que reglamentaron la materia, ni (iii) la reiterada jurisprudencia de la Corte Constitucional.”*

13.1.4. El 23 de marzo de 2007, el Ministerio de la Protección Social informó al Tribunal Superior de Bogotá que dos días antes, el 21 de marzo, había dado respuesta cabal al derecho de petición presentado por Sanitas EPS. El escrito, presentado por la Oficina Asesora Jurídica y de Apoyo Legislativo del Ministerio, reiteraba que la solicitud presentada por la entidad debía ser absuelta de forma negativa, pero que ello no implicaba desconocer el derecho

fundamental de petición. Dijo al respecto el Ministerio,

*“De conformidad con lo dispuesto en el artículo 218 de la Ley 100 de 1993, el Fondo de Solidaridad y Garantía, es una cuenta adscrita al Ministerio de Salud, hoy de la Protección Social, que se manejará por encargo fiduciario, sin personería jurídica ni planta de personal propia, de conformidad con lo establecido en el Estatuto General de Contratación de la Administración Pública de que trata el artículo 150 de la Constitución Política.*

*En este sentido, debe indicarse que si bien es cierto por mandato legal se autoriza el manejo de los recursos del Fosyga, a través de un encargo fiduciario, ello en ningún caso comporta la pérdida de competencia legal para el Ministerio como organismo de Dirección y Control de dicho fondo.*

*En tal virtud este Ministerio en desarrollo de lo dispuesto en el artículo 173 de la Ley 100 de 1993, expidió la Resolución 2933 de 2006 por la cual se reglamentan los Comités Técnico-Científicos y se establece el procedimiento de recobro ante el fondo de solidaridad y garantía, Fosyga, por concepto de suministro de medicamentos no incluidos en el Plan Obligatorio de Salud, POS y de fallos de tutela, disposición en la cual en su artículo 11 se determinan los requisitos especiales de la solicitud de recobros originados en fallos de tutela, dentro de los cuales en el literal (b) se establece: ‘primera copia del fallo de tutela con constancia de ejecutoria. Para cuentas consecutivas originadas en el mismo fallo, se relacionará el número de radicado de la primera cuenta presentada en la cual se anexó la primera copia del fallo’.*

*(...) la exigencia de la primera copia de la providencia judicial junto con su constancia de ejecutoria deriva del principio presupuestal de legalidad del gasto, según el cual, no podrán autorizarse gastos que no correspondan a créditos judicialmente reconocidos, habida cuenta que los recursos del Sistema General de Seguridad Social en Salud no pueden destinarse ni utilizarse para fines distintos y respecto de los cuales conforme a lo indicado en el citado Decreto 1281 de 2002, deben protegerse con el único objeto de evitar pagos de lo no debido.*

*(...)*

*Así las cosas, este Ministerio no está desconociendo como lo afirma el peticionario, los principios constitucionales de celeridad y eficiencia por exigir la primera copia del fallo de tutela con constancia de ejecutoria, sino que por el contrario está velando por la adecuada destinación de los recursos del Sistema General de Seguridad Social a lo cual está obligado conforme a lo previsto en*

*el numeral 22 del artículo 2 del Decreto Ley 205 de 2003 en observancia del mandato constitucional previsto en el artículo 48 de la Constitución Política y de los artículos 9 y 154 de la Ley 100 de 1993 y en consecuencia no encuentra procedente la modificación propuesta por el peticionario de la Resolución 2933 de 2006 la cual en virtud del principio de la legalidad consagrado en el artículo 66 del CCA que ampara los actos administrativos, se presume válida y de obligatorio cumplimiento mientras no haya sido anulada o suspendida por la Jurisdicción de lo Contencioso Administrativo.”*

El Ministerio señaló también, que no le era posible definir el alcance del término ejecutorio para los fallos de tutela, por cuanto “(...) no es competente para reglamentar este tema en particular, tema expresamente regulado por el Código Contencioso Administrativo.” Además, sostuvo, debe recordarse la prohibición consagrada en el artículo 121 de la Constitución según el cual ‘ninguna autoridad del Estado podrá ejercer funciones distintas de las que atribuyen la Constitución y la Ley’.

Finamente, el Ministerio consideró que no es su obligación legal responder afirmativamente las solicitudes que le son presentadas; sostiene que dejar de hacer no conlleva la violación de un deber legal.

### **13.2. Decisión de primera instancia**

13.2.1. El 11 de abril de 2007, la Sala Civil del Tribunal Superior de Bogotá, resolvió negar la tutela solicitada, por considerar que el Ministerio de la Protección Social no violó el derecho de petición de Sanitas EPS. A juicio de la Sala del Tribunal, la entidad no desconoció la petición presentada por la EPS. Dice al respecto la sentencia,

*“(...) manifestó la Jefe de la Oficina Asesora Jurídica y de Apoyo Legislativo del Ministerio de la Protección Social que dio respuesta al derecho de petición que le elevó el accionante, pues con comunicación N° 59390 [–fecha el 21 de marzo de 2007–] respondió de fondo no accediendo a la solicitud de modificación del literal (b) del artículo 11 de la Resolución 2933 de 2006, agregando que no está incurriendo en incumplimiento de un deber legal como lo prevé el artículo 8 de la Ley 397 de 1997.*

*Además, de la lectura del escrito presentado por la accionante al Ministerio de la Protección Social encuentra esta Sala de decisión que del mismo no se desprende petición alguna, ya que lo allí pretendido es un cambio a la reglamentación jurídica para adelantar el recobro ante el Fosyga, lo cual, a toda luces es improcedente, pues dicho Ministerio no es el competente para realizar el citado cambio o para reglamentar el tema en particular, por encontrarse el mismo regulado expresamente en la Ley. Aunado*

*a ello vale recordar que en virtud de lo previsto en el artículo 121 de la Constitución Política ninguna autoridad del Estado podrá ejercer funciones distintas de las que atribuyen la Constitución y la ley.”*

13.2.2. Sanitas EPS impugnó la decisión del Tribunal por considerar que ésta se funda sobre supuestos falsos o inexactos. Al respecto señaló lo siguiente,

*“La negativa de amparo del derecho de petición de mi poderdante se profirió sobre presupuestos fácticos y jurídicos que no corresponden a la realidad, pues no es cierto (i) que la respuesta entregada por el Ministerio de la Protección Social pueda ser considerada como una respuesta oportuna, de fondo, clara, efectiva, adecuada ni integral al derecho de petición que dio origen a la acción de tutela de la referencia, (ii) que el Ministerio de la Protección Social carezca de facultades para modificar la reglamentación en los términos solicitados, puesto que el procedimiento sobre el cual versa la petición presentada por EPS Sanitas, es precisamente un procedimiento que fue implementado mediante resolución por parte de la entidad accionada tal como se demostrará en este escrito de impugnación, ni (iii) que no se desprenda petición alguna del escrito radicado por la EPS Sanitas ante la entidad accionada.”*

Para Sanitas EPS no es aceptable que el juez de instancia haya considerado que el Ministerio de la Protección Social no es competente para expedir la reglamentación solicitada y/o para aclarar el sentido de las resoluciones que ese despacho ministerial ha expedido. A su juicio,

*“(…) si se hubiera procedido a una lectura cuidadosa de los hechos que le fueron presentados para su análisis, ese despacho habría comprobado sin lugar a duda alguna que fue el propio Ministerio de la Protección Social, mediante la expedición de las Resoluciones 2949 de 2003, 3797 de 2004 (hoy derogadas) y 2933 de 2006, la entidad que procedió a reglamentar de forma íntegra el procedimiento de recobro ante el Fosyga, en uso de facultades que, según expresa en el encabezado de las resoluciones citadas, le confiere la Ley 100 de 1993.*

*EPS Sanitas, en ejercicio de su derecho fundamental de petición, y exponiendo ante esa entidad argumentos y consideraciones claras y concretas, solicitó a ese despacho (i) la simplificación del procedimiento de presentación de las solicitudes de recobro para eliminar formalismos en exceso onerosos y (ii) subsidiariamente, la complementación de dicha reglamentación para que se procediera a precisar el alcance del término ejecutoria para los fallos de tutela, indicando que dicho término era el consagrado por el artículo 32 del Decreto 2591 de 1991.”*

Sanitas EPS advirtió que el requisito de presentación de la sentencia ejecutoriada tiene fundamento para el pago de obligaciones dinerarias derivadas de sentencias condenatorias con cargo al presupuesto de la Nación, según lo exige el artículo 1 del Decreto 768 de 1993, lo que a su juicio no ocurre cuando se trata de recobros ante el Fosyga. Dijo Sanitas EPS al respecto,

*“(…) la existencia de un procedimiento especial con requisitos exigentes como el de la presentación de la primera copia de la sentencia con constancia de ejecutoria tiene relevancia en el caso del pago de obligaciones dinerarias derivadas de sentencias condenatorias a cargo de la Nación, en cuanto dichos pagos tienen incidencia presupuestal.*

*Sin embargo, eso no ocurre cuando se trata del pago de solicitudes de recobro originadas en fallos de tutela que ordenan el suministro de medicamentos o la presentación de servicios no incluidos en el POS, ya que se trata de recursos parafiscales sin incidencia presupuestaria y en ningún caso son condenas contra la Nación, sino simplemente reembolsos dinerarios a terceros por concepto de medicamentos y procedimientos no incluidos en el POS y que, en virtud de una orden judicial, han sido asumidos temporalmente por los agentes privados del Sistema General de Seguridad Social en Salud para el posterior reembolso por parte del Estado.”*

Finalmente, Sanitas EPS indicó que requisitos como el solicitado [primera copia del fallo de tutela con constancia de ejecutoria] son muy difíciles de cumplir en muchos casos, lo que constituye una barrera infranqueable, que desborda la responsabilidad que a las EPS les atañe. A su parecer, la carga excesiva se hace más patente si se tiene en cuenta que las EPS están, en últimas, prestando un servicio temporal en desarrollo de mandatos judiciales o de órdenes de expertos médicos que “no tienen propósito distinto del de descargar de manera más eficiente y oportuna las obligaciones constitucionales del Estado.” Para Sanitas EPS,

*“(…) la reglamentación expedida por el Ministerio de la Protección Social, tal y como se encuentra actualmente, genera un rompimiento del equilibrio de las cargas públicas e imponen una carga injustificada y excesivamente gravosa a las EPS.*

*De la misma manera, se desprende de la actual reglamentación una violación al principio de la eficacia en las actuaciones de la Administración que conlleva la obligatoriedad de cumplir de forma adecuada con las funciones que se le han asignado.*

*En la medida en que las EPS se han visto en la obligación de asumir cargas que exceden el ámbito de su responsabilidad,*

*representadas en el pago de medicamentos y servicios no incluidos en el POS, se ha diseñado un mecanismo complejo mediante el cual el Estado, como obligado constitucional y legal de atender las necesidades básicas de salud de los ciudadanos, debe compensar de manera eficiente a los agentes privados que tienen que asumir temporalmente dicha carga como consecuencia de una orden judicial perentoria.”*

13.2.3. Sanitas EPS remitió al juez de segunda instancia (la Sala Civil de la Corte Suprema de Justicia) un concepto proferido por el Ministerio del Interior y de Justicia a petición de ACEMI en el cual, a su juicio, se reafirma con acertado criterio, que los recursos parafiscales y, por tanto, su manejo, está al margen de las normas sobre presupuesto. Razón por la cual resulta ilegal la solicitud de la primera copia del fallo con constancia de ejecutoria. Las respuestas del Ministerio del Interior y de Justicia a las cuestiones planteadas por el Presidente de ACEMI, Juan Manuel Díaz-Granados Ortiz son las siguientes,

*“1. ¿De manera general cuándo es obligatorio el cumplimiento de la sentencia para todos los involucrados en el cumplimiento del fallo de tutela?*

[...]

Como puede deducirse de los textos constitucionales y legales así como de las consideraciones jurisprudenciales y doctrinales que se han transcrito, la orden en que se concreta el fallo de tutela siempre es, para todos los involucrados en su cumplimiento, no sólo obligatoria sino, además, de inmediato y estricto cumplimiento.

*2. Si cuando en el cumplimiento se involucra a una entidad pública o recursos públicos o recursos de la seguridad social, ¿puede oponerse alguna excepción que impida el cumplimiento inmediato del fallo?*

Como ya se dijo –y sin necesidad de entrar en discusiones de fondo sobre la verdadera naturaleza de la acción de tutela, del procedimiento mediante el cual se tramita y de la decisión con la que culmina–, a la orden que imparte el juez, la ‘sentencia’ que profiere, no pueden aplicársele, sin más, los mecanismos procesales previstos en el orden jurídico para hacer frente a las sentencias típicas o estándar, las que ‘dicen el derecho’ [...]

[...]

La regulación constitucional o legal no prevé la formulación de excepciones contra el fallo de tutela, excepciones que, no sobra recordarlo, son de carácter procesal y proceden contra las sentencias típicas, no contra los fallos de tutela, dictados como ‘remedio

urgente', no como conclusión de un proceso (sentencia T-459/03)".

3. *¿La entidad pública o funcionario que administre recursos públicos puede argumentar que el cumplimiento del fallo está sujeto a algún requisito adicional?*

Las respuestas anteriores indican que si el juez de tutela no establece en su fallo ningún requisito adicional para el cumplimiento del mismo, no puede recurrirse a disposiciones de los códigos de procedimiento para tratar de deducir, por la vía de la aplicación analógica, que el cumplimiento del fallo está sujeto a requisitos adicionales. Es, como ya se ha dicho en forma reiterada, de inmediato cumplimiento.

4. *¿Pueden los obligados con el fallo de tutela argumentar que no cumplen con la decisión del juez, señalando que se trata de erogaciones a cargo de los recursos del Estado que requieren una revisión y aprobación previa?*

Ante todo hay que señalar, y así se afirma en la sentencia SU-480 de 1997, que los recursos del sistema de seguridad social en Colombia son parafiscales y, por tanto, "su manejo está al margen de las normas presupuestales y administrativas que rigen los recursos fiscales provenientes de impuestos y tasas, a menos que el ordenamiento jurídico específicamente lo ordene ... por lo tanto no le son aplicables las normas orgánicas del presupuesto ..." (se ha destacado)

Pero aun suponiendo que fueran recursos públicos, y que para cumplir la orden no existiera previamente partida presupuestal, la decisión del juez de tutela no sólo crea gasto público sino que, además, ordena su realización. Decisión del juez constitucional que obedece a la obligación de procurar la efectividad de los derechos fundamentales, según lo consagra el artículo 86 de la CP. Así pues, ni siquiera en tales casos cabe exceptuarse del cumplimiento del fallo de tutela. Y es difícil imaginar otras condiciones de 'revisión y aprobación previa' que pudieran justificar el no cumplimiento.

5. *¿Puede la EPS argumentar que no cumple el fallo de tutela porque el Fosyga no le ha pagado el valor de la erogación que tiene que cubrir por fuera del plan obligatorio de salud?*

De ser válido el enfoque que subyace a la pregunta, el fallo del juez de tutela no daría la orden incondicionada de cumplir la obligación que allí se le impone a la EPS sino que, por el contrario, señalaría la condición para el cumplimiento de la orden.

[...]

Por otra parte, hacer depender el cumplimiento del fallo del pago del valor de la erogación por Fosyga invierte el orden cronológico que se establece en el fallo, donde en forma expresa se consagra el derecho de la EPS a repetir contra el Fosyga. Si Fosyga tuviera que pagar antes, no se podría hablar de repetición, la cual presupone un pago anterior. La orden del juez de tutela a la EPS pague y repita no puede hacerse equivalente a una especie de orden cobre primero y después pague.

*6. ¿Puede el Fosyga oponerse a pagar a la Empresa Promotora de Salud porque se encuentra el fallo surtiendo los recursos respectivos?*

En relación con esta pregunta, se reitera que a la acción de tutela no le son aplicables, sin más, normas procesales como las que se refieren a proceso, sentencia y recurso.

La oposición del Fosyga al pago tendría como base la consideración de que el fallo de tutela no ha quedado en firme y que, por tanto, aún no ha nacido para la Empresa Promotora de Salud el derecho a obtener el reembolso de lo pagado.

Con esta oposición se olvidaría que frente al fallo de tutela existe el derecho de impugnar, sin que la impugnación suspenda su cumplimiento. El artículo 86 de la CP establece, en forma clara, que ‘El fallo, que será de inmediato cumplimiento, podrá impugnarse ...’ No podría, entonces, argumentarse una especie de ‘efecto suspensivo’ para el cumplimiento del fallo, por virtud de la concesión del recurso. Imposibilidad que resulta aún más clara a la luz del artículo 31 del Decreto 2591 de 1991, que dispone que ‘el fallo podrá ser impugnado ... sin perjuicio de su cumplimiento inmediato.

Si el cumplimiento del fallo de tutela no puede diferirse por razón de la presentación de la impugnación, ello quiere decir que la EPS está obligada a pagar, en forma inmediata, la obligación que el juez constitucional le ha impuesto (no se olvide que el pago efectivo, según la definición del artículo 1626 del Código Civil, es ‘la presentación de lo que se debe’). Y es el pago el que le da título a la EPS para exigir de Fosyga su reembolso total o parcial, en los términos fijados por el juez constitucional.

Si en el fallo de tutela se establece un plazo para que Fosyga efectúe el reembolso, será dentro del cual se deberá hacer el pago. En ausencia de fijación de plazo, éste deberá hacerlo Fosyga siguiendo las reglas señaladas en la ley, pero sin que pueda formularse como oposición, se repite, el que se estén surtiendo los

recursos interpuestos contra el fallo de tutela.

En la sentencia SU-480 de 1997, ya citada, se afirma a este respecto, que la ‘repetición se debe tramitar con base en el principio de celeridad, ya que la información debe estar computarizada, luego, si hay cruce de cuentas, éste no constituye razón para la demora, sino que, por el contrario, la acreencia debe cancelarse lo más rápido.’”

### 13.3. Decisión de segunda instancia

El 9 de mayo de 2007, la Sala Civil de la Corte Suprema de Justicia resolvió confirmar el fallo proferido por la Sala Civil del Tribunal Superior de Bogotá que negó el amparo de tutela, por considerar que la respuesta que dio el Ministerio de la Protección Social a la petición de Sanitas EPS, el 21 de marzo de 2007, durante el trámite de la acción de tutela en primera instancia, no denotaba ‘*arbitrariedad o desconocimiento*’ del derecho de petición. Para la Corte Suprema de Justicia, en su respuesta el Ministerio,

*“(…) indicó que no [es] competente para reglamentar el tema de la ‘ejecutoria’ de las sentencias de tutela, dado que el punto se halla regulado por el Código de Procedimiento Civil.”*

*De lo anterior queda claro, primero, que la solicitud de la gestora, contrario a lo por ella afirmado, sí fue resuelta por el accionado; y segundo, que el trámite y respuesta dada a la petición no denotan arbitrariedad alguna o desconocimiento de la garantía fundamental invocada.”*

### 14. Expedientes T-1855547, T-1858995, T-1858999, T-1859088, T-1862038, T-1862046, T-1866944, T-1867317, y T-1867326 (duda acerca de la inclusión del lente intraocular en el POS)

14.1. T-1855547. Carlos Cortes Cortes contra Coomeva EPS. Juzgado Primero Penal Municipal de Tulúa, Valle.

14.1.1. Carlos Cortes Cortes interpuso acción de tutela contra Coomeva EPS por considerar que dicha entidad ha vulnerado sus derechos a la salud en conexidad con la vida, la dignidad y la seguridad social. Relata el accionante que su médico tratante le diagnosticó catarataOI y le ordenó *Facoemulsificación + lente intraocular*. La entidad accionada autorizó el procedimiento pero negó el lente intraocular bajo el argumento de que el mismo no se encontraba incluido en el POS y él carece de recursos económicos para asumir su costo.

Coomeva EPS intervino en el proceso para señalar: “(…) el *LENTE*

*INTRAOCULAR, no le será autorizado debido a que no se encuentra dentro de la cobertura del plan obligatorio de salud, Régimen contributivo. (Resolución 5261 de Agosto 05 de 1994 del Ministerio de Salud. MAPIPOS) || Ahora bien es de tener en cuenta que el señor CARLOS CORTES CORTES, cuenta con un ingreso base de cotización de Dos Millones Novecientos Once Mil pesos moneda corriente (\$2.911.000), teniendo entonces la capacidad económica necesaria para asumir el costo del lente intraocular, puesto que la cirugía de colocación corre por cuenta nuestra por encontrarse dentro del Plan Obligatorio de Salud. || El LENTE INTRAOCULAR tiene un costo promedio de trescientos sesenta mil pesos m/c (\$360.000).”*

14.1.2. El Juzgado Primero Penal Municipal de Tulúa, Valle, profirió sentencia el 15 de noviembre protegiendo los derechos de Carlos Cortes Cortes bajo el argumento de que: *“El señor Cortes Cortes, indudablemente requiere que se le autorice la entrega del Lente Intraocular para su ojo izquierdo ordenado por el médico especialista tratante, pues dicha negativa contribuye entretanto a que tenga una disminución de su nivel de vida al no permitírsele tener una salud óptima (...). Por tanto y como quiera que ciertamente, con su actuación, la entidad accionada ha vulnerado los derechos a la seguridad social, y a la salud en conexidad con la vida digna del accionante, por ello deberá inaplicarse el parágrafo del artículo 12 de la Resolución 5261 de 1994(...).”* En la parte resolutive adicionalmente se ordenó el recobro al Fosyga.

14.2. T- 1862046. *Carmen Raquel Betancourt de Villalobos contra Saludcoop EPS. El Juzgado Cuarto Penal Municipal de Barranquilla, Atlántico.*

14.2.1. Carmen Raquel Betancourt de Villalobos interpuso acción de tutela contra SaludCoop EPS por considerar que dicha entidad ha vulnerado sus derechos a la vida digna, al debido proceso, al mínimo vital y a la seguridad social. Relata la accionante que su médico tratante le diagnosticó Catarata OD y le ordenó *extracción extracapsular de catarata + implante de lente intraocular plegable O.D.* La entidad accionada no autorizó la adaptación de lente intraocular bajo el argumento que la prótesis ocular no se encontraba incluida en los beneficios del Plan Obligatorio de Salud, lo cual le impide el acceso al servicio ya que, según afirma, carece de recursos económicos para asumir el costo.

SaludCoop EPS intervino en el proceso para señalar que *“(...) la señora CARMEN BETANCOURT DE VILLALOBOS por intermedio de apoderado judicial presenta acción de tutela con el objeto de que la EPS le autorice el cubrimiento del costo económico del elemento LENTE INTRAOCULAR PLEGABLE PARA EL IMPLANTE EN SU OJO DERECHO que le fuera recomendado por el medico tratante, elemento de entrega única, es decir una vez que le sean colocados desaparece la amenaza o perturbación, estos procedimientos están excluidos del POS, por obvias razones no presta ni esta dentro del manual y servicios a sus usuarios este tipo de procedimiento, porque no esta autorizado por el CNSS para que lo brinden las EPS”*

14.2.2. El Juzgado Cuarto Penal Municipal de Barranquilla, Atlántico, profirió sentencia el 17 de agosto protegiendo los derechos de CARMEN RAQUEL BETANCOURT bajo el argumento de que “(...) *la cirugía ordenada a la accionante proviene de la especialistas a cargo del caso, de la E.P.S. accionada y por no haber sido esta afirmación desvirtuada por entidad accionada y porque tampoco existe prueba de que el LENTE INTRAOCULAR PLEGABLE OD haya sido suministrado a la demandante, no cabe duda al despacho de que LA ACCIONANTE ha sido asaltada en el goce de los derechos constitucionales invocados, en tanto que la CIRUGIA ORDENADA “ EXTRACCIÓN EXTRACAPSULAR DE CATARATA MAS IMPLANTE DE LENTE INTRAOCULAR PLEGABLE O.D. ayuda a aliviar la patología de la actora, y según lo afirma ella misma, es una persona de escasos recursos; lo que indica que no tiene capacidad económica para sufragar los costos de la cirugía del lente intraocular para el implante de su ojo derecho y posterior tratamiento a consecuencia de la cirugía referida (...). Será inhumano que la continuación real de un tratamiento urgente quedara en entredicho para efectos de la protección de derechos fundamentales por la disculpa de dar estricto cumplimiento a normas legales cuya jerarquía se encuentra en grado inferior a los derechos fundamentales.*” En la parte resolutive adicionalmente se ordenó el recobro al FOSYGA.

14.2.3. SaludCoop EPS impugno la decisión correspondiendo decidir la segunda instancia al Juzgado Sexto Penal del Circuito de Barranquilla, Atlántico, el cual profirió sentencia el 28 de septiembre confirmando la decisión de primera instancia bajo el argumento de que “*No existe duda en este caso que la negación de la entrega del lente intraocular que le fue ordenado a la paciente por su médico tratante, constituye una enorme amenaza contra su derecho fundamental a la vida, pues sin él no podría realizársele la cirugía de extracción de catarata que necesita, así como tampoco de que el mismo pueda ser remplazado por otro elemento que aparezca incluido en el POS (...). Queda claro que SALUDCOOP EPS debe responder por el suministro del lente intraocular que requiere la señora CARMEN RAQUEL BETANCOUR DE VILLALOBOS para la realización de la cirugía de extracción de cataratas que le fue prescrita.*”

14.3. T- 1866944. Elvia Sánchez de Alonso contra Sanitas EPS. Juzgado Primero Municipal de Ibagué, Tolima.

14.3.1. Elvia Sánchez de Alonso interpuso acción de tutela contra Sanitas EPS por considerar que dicha entidad ha vulnerado sus derechos a la vida en conexidad con la salud y la seguridad social. Relata la accionante que su medico tratante le diagnosticó catarata OD y le ordenó *Extracción de cataratas + Implantación de lente intraocular*. La entidad accionada autorizó el procedimiento pero negó el lente intraocular bajo el argumento de que no se encontraba incluido en el POS lo cual le impide el acceso al servicio ya que, según afirma, carece de recursos económicos para asumir el costo.

Sanitas EPS intervino en el proceso para señalar que “(...) la EPS SANITAS S.A. realizará el cubrimiento económico de la cirugía prescrita a la señora SANCHEZ (no del lente), de acuerdo con los contenidos del Plan Obligatorio de Salud. // En consecuencia y acorde con las disposiciones antes transcritas, resulta evidente que el afiliado, debe financiar directamente los gastos que sean generados con ocasión del LENTE INTRAOCULAR, toda vez que dicho servicio corresponde a “servicios adicionales a los incluidos en el POS”.

14.3.2. El Juzgado Primero Civil Municipal de Ibagué, Tolima, profirió sentencia el 31 de octubre protegiendo los derechos de Elvia Sánchez de Alonso bajo el argumento de que “(...) la no autorización del lente intraocular por parte de la EPS atenta contra las condiciones de vida digna a que tiene derecho la señora ELVIA SANCHEZ DE ALONSO, pues la pérdida paulatina de su visión hace más gravosa su movilización y le impide el desempeño normal en sus labores cotidianas afectando de manera negativa su calidad de vida y menoscaba su dignidad. Además de tener en cuenta que se trata de una persona de la tercera edad, pues en la actualidad cuenta con 69 años (...) Y en el entendido que el médico especialista considero pertinente realizar EL PROCEDIMIENTO QUIRÚRGICO CON IMPLANTE DEL LENTE INTRAOCULAR en su ojo derecho, considera el Juzgado que aún cuando la autorización del lente no esta incluida en el POS, este deberá ser autorizado al paciente que así lo requiere.” En la parte resolutive adicionalmente se ordenó el recobro al FOSYGA.

14.4. T-1867317. Enrieta Dolores Rodríguez Martes contra Saludcoop EPS. Juzgado Cuarto Civil Municipal de Barranquilla, Atlántico.

14.4.1. Enrieta Dolores Rodríguez, interpuso acción de tutela contra Saludcoop EPS, por considerar que dicha entidad ha vulnerado sus derechos a la salud en conexidad con la vida. Relata la accionante que su médico tratante le diagnosticó catarata OI y le ordenó la extracción de catarata + lente intraocular. La entidad accionada autorizó el procedimiento quirúrgico pero negó el lente intraocular bajo el argumento de que el mismo no se encontraba incluido en el POS lo cual le impide el acceso al servicio ya que, según afirma, carece de recursos económicos para asumir el costo.

Saludcoop EPS intervino en el proceso para señalar que “(...) la cirugía de Cataratas no tienen nada que ver con el implante o no de un lente intraocular, pues la motivación es distinta que es el diagnostico de CATARATAS. Pues en muchas ocasiones para usuarios de esta edad, no le es suficiente la colocación de un lente intraocular pues requieren de gafas refractarias de ahí lo innecesario o poco resultado positivo. || Los elementos solicitados por consideraciones del CNSSS en la resolución 5261 de 1994 en su artículo 18 de las exclusiones y limitaciones del POS es no pos, razón por la cual dentro de los servicios autorizados a la EPS, no se haya el solicitado por la accionante, de tal manera que el Estado considera que debe inicialmente el peticionario o su grupo familiar asumir el costo del mismo o en su defecto una institución de la red pública.”

14.4.2. El Juzgado Cuarto Civil Municipal de Barranquilla, Atlántico, profirió sentencia el 18 de Diciembre protegiendo los derechos de Enrieta Rodríguez Martes bajo el argumento de que “(...) *es imprescriptible considerar que no existe norma legal que ampare la negativa del lente intraocular diagnosticado por el médico tratante, necesario para la cirugía si así lo estableció el médico tratante, como la mejor alternativa para la paciente, debido a que por encima de la legalidad u normatividad está la vida, ante la existencia de una cirugía supedita a la autorización del suministro del lente que requiere es de alto costo, tiene un valor de \$700.000.00, sin que se cuenten con los recursos necesarios para sufragarlo tal como lo expreso en la solicitud de tutela, es pensionada con un salario mínimo legal, cuenta con 72 años, es una persona que no cuenta con apoyo económico de ninguna otra persona (...). Lo fundamental en el presente caso, es proporcionarle a la accionante el lente intraocular, de manera pronta y oportuna, de tal manera que no se le siga deteriorando su visión, por requerir la cirugía de catarata y el implante del lente intraocular en su lente izquierdo, lo importante y esencial es amparar sus derechos que le permitan tener una vida digna y la recuperación de su salud (...)*”. En la parte resolutive adicionalmente se da la opción de hacer uso de la acción de repetición en contra del Fosyga.

14.5. T-1862038. *Alba Isabel Pinto de Monroy contra Saludcoop EPS. Juzgado Veintitrés Civil Municipal de Cali, Valle.*

14.5.1. Alba Isabel Pinto de Monroy, interpuso acción de tutela contra Saludcoop EPS, por considerar que dicha entidad ha vulnerado sus derechos a la salud en conexidad con la vida. Relata la accionante que su médico tratante le diagnosticó catarata y le ordenó *Extracción de la catarata + lente ocular*. La entidad accionada autorizó el procedimiento quirúrgico pero negó el lente intraocular bajo el argumento de que el mismo no se encontraba incluido en el POS, lo cual le impide el acceso al servicio ya que, según afirma, carece de recursos económicos para asumir el costo.

Saludcoop EPS intervino en el proceso para señalar, en relación con la accionante “*que presenta catarata por motivo del cual le fue prescrito el suministro de Prótesis Ortesis Aditamento ortopédico o para alguna función biológica no POS (lente intraocular No. 1), la cual no puede ser autorizada por la EPS, debido a que no forma parte de los beneficios del Plan Obligatorio de Salud POS (...) Por consiguiente, corresponderá al (la) usuario(a) y/o su núcleo familiar en virtud del principio de solidaridad, sufragar directamente el costo de la prótesis solicitada, y en caso de que no cuenten con los recursos económicos para el efecto , podrán acudir a las instituciones públicas y aquellas privadas que tengan contrato con el Estado, las cuales estarán en la obligación de atenderlo(a) de conformidad con su capacidad de oferta(...)*”.

14.5.2. El Juzgado veintitrés Civil Municipal de Cali, Valle, ordenó vincular al proceso al Ministerio de Protección Social en calidad de accionado, el cual

intervino para señalar que *“en atención al asunto de la referencia que trata de un Suministro e implante de lente intraocular, me permito manifestarle que el procedimiento referido se encuentra incluido en el Manual de Actividades del POS, conforme al artículo 57 de la resolución 5261 de 1991. (...) No obstante lo anterior, la atención de la accionante, requiere de un mínimo de semanas cotizadas dentro del Sistema General de Seguridad Social en Salud, el cual no debe sobrepasar el límite señalado en el literal h del 14 artículo de la ley 1122 de 2007, el cual es de 26 semanas. (...) Lo anterior significa que la accionante tendrá derecho al tratamiento integral mencionado, por parte de la E.P.S., siempre y cuando tenga las semanas aludidas, lo cual incluye toda la intervención, procedimiento, actividad quirúrgica y medicamentos que se encuentren incluidos en los listados POS (...)”*.

El Juzgado Veintitrés Civil Municipal de Cali, Valle, profirió sentencia el 7 de Noviembre protegiendo los derechos de Ana Isabel Pinto bajo el argumento de que *“es evidente para este Despacho, que los argumentos que han llevado a dilatar la práctica del tratamiento de la parte actora, sólo corresponde a aspectos netamente económicos, condición sobre la cual predomina el derecho fundamental a la salud en conexidad con la integridad personal y la vida que han sido vulnerados por la entidad demandada, al condicionar y desconocer por no encontrarse incluido en el Plan Obligatorio de Salud el cubrimiento del costo del tratamiento que requiere pasa su normal restablecimiento de la salud (...)”*. En la parte resolutive adicionalmente se ordenó el recobro al Fosyga.

14.5.3. El Ministerio de Protección Social impugnó la autorización a la EPS accionada a recobrar ante el Fosyga, la cual no fue estudiada por haber sido extemporánea.

14.6. T-1858999. Alfonso Carmelo Villamil Fernández contra Salud total EPS. Juzgado Décimo Penal Municipal de Barranquilla, Atlántico.

14.6.1. Alfonso Carmelo Villamil Fernández, interpuso acción de tutela contra Salud total EPS, por considerar que dicha entidad ha vulnerado sus derechos a la salud en conexidad con la vida. Relata el accionante que su médico tratante le diagnóstico catarata senil nuclear 6 y le ordenó *Facoemulsiificación + lente ocular*. La entidad accionada autorizó el procedimiento quirúrgico pero negó el lente intraocular bajo el argumento de que el mismo no se encontraba incluido en el POS y el carece de recursos económicos para asumir su costo.

Salud total EPS intervino en el proceso para señalar que *“es claro que el lente intraocular solicitado no se encuentra contemplado dentro del artículo 12 de la Resolución 5261 de 1994, pues no es susceptible de considerarse una prótesis valvular. Para el caso que nos ocupa el lente intraocular requerido no cumple con la definición de prótesis valvular, porque aunque se ajusta a lo correspondiente a válvula, como regulador del paso de un fluido, no se ajusta a la definición de prótesis, puesto que no reemplaza ninguna estructura anatómica previamente existente, razón por la cual no sería procedente en*

*últimas su cobertura. En ese orden de ideas, resulta claro, que no es obligación legal de la E.P.S. asumir coberturas de tratamientos sujetos a períodos mínimos de cotización o excluidos del POS y que por el contrario, por norma expresa corresponde al Estado dicha atención, es menester concluir, que no es Salud Total quien vulnera derechos, sino por el contrario, el Estado mismo, a través de sus entes territoriales (...)*”.

14.6.2. El Juzgado Décimo Penal Municipal de Barranquilla, Atlántico, profirió sentencia el 11 de Septiembre protegiendo los derechos de Alfonso Carmelo Villamil bajo el argumento de que *“se trata de un lente intraocular, que no figura dentro del listado del POS, y para que proceda la tutela de derechos fundamentales relacionados con el suministro de cuatro requisitos a saber: (1) que la falta de medicamento o tratamiento excluido, amenacen los derechos fundamentales del interesado (2) que se trate de un medicamento o tratamiento que no pueda ser sustituido por uno de los contemplados en el Plan Obligatorio de Salud o que pudiendo sustituirse, el sustituto no tenga el mismo nivel de efectividad que el excluido (3) que el paciente no pueda realmente sufragar el costo del medicamento o tratamiento requerido y (4) que el medicamento o tratamiento haya sido prescrito por un médico adscrito a la Empresa Promotora de Salud a la cual se halle afiliado el accionante. Los anteriores presupuestos se configuran en el caso que nos ocupa, así mismo la incapacidad económica está presente, teniendo en cuenta la afirmación del accionante plasmada en su escrito presentado a éste Juzgado (...)”*. En la parte resolutive adicionalmente se ordenó el recobro al Fosyga.

14.7. T-1858995. *Enrique del Carmen Martínez Muñoz contra Saludcoop EPS. Juzgado Décimo Penal Municipal de Barranquilla, Atlántico.*

14.7.1. Enrique del Carmen Martínez Muñoz interpuso acción de tutela contra Saludcoop EPS por considerar que dicha entidad ha vulnerado sus derechos a la salud y a la seguridad social. Relata el accionante que es atendido a través de la IPS Fundación Oftalmológica del Caribe, quienes luego de practicados los exámenes y estudios que el caso amerita, le diagnosticaron catarata – ojo derecho, y determinaron necesaria la cirugía de Extracción de catarata + Implante de un lente Intraocular + Lío Plegable – Ojo derecho, para la corrección de la anomalía detectada. La entidad accionada negó la autorización del lente intraocular referenciado, aduciendo que está excluido del POS y el accionante manifiesta que es una persona de escasos recursos económicos y se le imposibilita acceder al servicio con sus propios recursos.

Saludcoop EPS intervino en el proceso para señalar que *“(...) este procedimiento que según la Resolución 5261 de 1994 Art. 18 de las Exclusiones y Limitaciones del POS, no puede ser autorizado por la EPS porque está excluido del POS por el CNSS.- Que solo los servicios POS que están autorizados por el CNSS está facultada la EPS a asumir su costo económico.”*

14.7.2. El Juzgado Décimo Penal Municipal de Barranquilla, Atlántico,

profirió sentencia el 28 de septiembre de 2007 protegiendo los derechos de Enrique del Carmen Martínez Muñoz bajo el argumento de que “*la Corte Constitucional en diferentes fallos y lo reitera en la sentencia T-616/2005 ‘... cuando aparezca que con la aplicación del Plan Obligatorio de Salud, se causa un perjuicio a quienes requieren de los procedimientos excluidos, a tal punto que de ellos dependen sus derechos constitucionales fundamentales a la vida, a la integridad personal y a la dignidad de las personas, la Corte ha dispuesto que en tales circunstancias se inaplique la reglamentación que excluye el tratamiento o medicamento requerido, ordenando su suministro para evitar de ese modo, que una reglamentación legal o administrativa impida el goce efectivo de garantías constitucionales, pues en casos de enfermedad manifiesta y ante la urgencia de tratamientos comprobados, no existe norma legal que ampare la negativa de prestar un servicio, pues por encima de la legalidad y normatividad, está la vida, como fundamento de todo sistema’ (...)*”. En la parte resolutive adicionalmente se ordenó el recobro al Fosyga.

14.8. T-1859088. *Mery Restrepo de Zuluaga contra Cafesalud EPS. Juzgado Segundo Civil Municipal de Barranquilla, Atlántico.*

14.8.1. Mery Restrepo de Zuluaga interpuso acción de tutela contra Cafesalud EPS por considerar que dicha entidad ha vulnerado sus derechos a la salud, a la seguridad social y a vida digna. Relata la accionante que es atendida a través de la Clínica Oftalmológica del Caribe a la cual fue remitida por el optómetra adscrito a Cafesalud EPS por habersele diagnosticado cataratas. Con base en este diagnostico el médico de la Clínica Oftalmológica del Caribe le ordenó una operación para insertar un *Lente Intraocular - Ojo Derecho + Recuento Endotelial*, debido a que es la única solución para no quedar completamente ciega. La entidad accionada negó la autorización del lente intraocular referenciado, aduciendo que está excluido del POS.

Cafesalud EPS intervino en el proceso señalando que “*(...) el Lente Intraocular Plegable para su ojo derecho y el examen de recuento endotelial, prescrito por su médico tratante para el tratamiento de la patología que presenta que corresponde a CATARATA, LOS CUALES NO PUEDEN SER SUMINISTRADOS POR LA EPS POR ESTAR FUERA DE LOS BENEFICIOS ESTABLECIDOS EN EL PLAN OBLIGATORIO DE SALUD (...). CONSIDERAMOS CONVENIENTE DEJAR EN CLARO QUE EL PROCEDIMIENTO DE EXTRACCIÓN DE CATARATA ESTÁ DENTRO DEL PLAN OBLIGATORIO DE SALUD, POR LO TANTO NO SE LE HA NEGADO EN NINGÚN MOMENTO SU PRÁCTICA, EL LENTE INTRAOCULAR, Y EL EXAMEN DE RECuento ENDOTELIAL SOLICITADOS, le corresponde al paciente sufragar directamente su costo, y en caso de que no cuente con los recursos económicos para el efecto, podrá acudir a las instituciones públicas y aquellas privadas que tengan contrato con el Estado, las cuales estarán en la obligación de atenderlo (...)*”.

14.8.2. El Juzgado Segundo Civil Municipal de Barranquilla, Atlántico

profirió Sentencia el 2 de noviembre de 2006 protegiendo los derechos de Mery Restrepo de Zuluaga bajo el argumento de que “*en varios fallos de enfermedades peligrosas o catastróficas, y en este caso la entrega del LENTE INTRAOCULAR PLEGABLE Y EL EXAMEN DE RECUENTO ENDOTELIAL SOLICITADOS, y su correspondiente INTERVENCIÓN QUIRÚRGICA referente a extracción de catarata en ojo derecho, que requiere la Accionante, máxime que ello viene señalado y advertido por la Fundación Oftalmológica del Caribe, donde es atendida la accionante por remisión de Cafesalud EPS, y los exámenes prequirúrgicos allí advertidos(Folios 11), y autorizar como ha venido autorizando en otras circunstancias parecidas a entregar las medicinas, que deriven de la patología existente, en el sentido del derecho a la vida, y el deber de proteger la salud en un porcentaje del 100% del valor total de los medicamentos y/o tratamientos o los que necesitara con otras drogas en caso de que las que necesita actualmente desaparezcan del comercio, cuyo cubrimiento será del 100% en dinero a cargo de la entidad Accionada, que en este caso hace referencia específica al LENTE INTRAOCULAR PLEGABLE Y EL EXAMEN DE RECUENTO ENDOTELIAL, no cubierto por el POS, ya que la cirugía si se encuentra autorizada dentro del Plan Obligatorio de Salud (...)*”. En la parte resolutive adicionalmente se ordenó el recobro al Fosyga.

14.9. T- 1867326. Rosario Hincapié Salazar contra Saludvida EPS. Juzgado Segundo de Familia de Medellín, Antioquia.

14.9.1. Rosario Hincapié Salazar interpuso acción de tutela contra SALUDVIDA EPS por considerar que dicha entidad ha vulnerado sus derechos a la salud en conexidad con la vida digna, la seguridad social, la igualdad y los derechos fundamentales de las personas de la tercera edad. Relata la accionante que su medico tratante le diagnostico cataratas y que era procedente realizarle la cirugía denominada *facoemulsificación ojo derecho con lente intraocular del ojo derecho*, la cual se dispuso para el día 05 de diciembre de 2007, pero condiciono la practica a la consignación del 30% de copago por (\$500.000) y además el lente que tiene un costo de (\$110.000), sumando (\$610.000), suma de la que no dispone por no contar con los recursos económicos para sufragar estos gastos. La entidad accionada autorizo el procedimiento pero condicionada a la cancelación del copago por encontrarse en nivel 3 del sisbén.

SALUDVIDA EPS intervino en el proceso para señalar que “*(...) la vinculación de la señora HINCAPIE SALAZAR al Régimen Subsidiado de Salud y el diagnostico de la afección que padece, argumentando que según lo dispuesto por el Acuerdo 306 del CNSS, los requerimientos de la paciente no están incluidos en el Plan de beneficios POS, Subsidio total. Advierte que la atención para lo no asegurado con la ARS, (sic), debe ser suministrado por los entes territoriales con cargo a los recursos provenientes del Sistema General de participación en salud, por lo tanto la atención requerida por la señora ROSARIO HINCAPIÉ SALAZAR está presupuestada por el ente territorial (...)*”.

Por su parte la Dirección Seccional de Salud de Antioquia se pronunció en el sentido de “(...) *que de la misma tutela se infiere claramente que la Dirección Seccional de Salud de Antioquia no le ha vulnerado ningún derecho constitucional fundamental a la accionante, requisito este esencial para que proceda y se pueda admitir una acción de tutela, que por el contrario se afirma que la EPS-S SALUDVIDA le autorizó la cirugía de cataratas y el lente intraocular; lo cual demuestra que la EPS-S ha cumplido con la atención requerida por la paciente y que era de su competencia.*” Frente a la solicitud de exoneración de copagos, afirma que no es la Dirección Seccional de Salud de Antioquia la que tiene el deber legal de aplicar la cancelación o exoneración de copagos, pues es cada IPS ó EPS la que tiene la obligación de hacer dicho cobro. Señala que ellos cancelan a cada IPS ó ESE el valor del procedimiento o actividad realizada, pero no la cuota que cada usuario está obligado a cancelar como prestación por el servicio recibido siendo este el único aporte que el Estado le exige al paciente y por Ley está establecido de acuerdo al porcentaje asignado por el nivel de Sisbén asignado a cada afiliado o vinculado.

14.9.2. El Juzgado Segundo de Familia de Medellín, Antioquia, profirió Sentencia el 3 de diciembre de 2007 protegiendo los derechos de Rosario Hincapié Salazar bajo el argumento de que: “(...) *el Acuerdo número 260 de 2004 en su artículo 5° erige como uno de los principios en la aplicación de las cuotas moderadoras y copago la equidad para consignar que estas: “en ningún caso pueden convertirse en una barrera para el acceso a los servicios, ni ser utilizados para discriminar la población en razón de su riesgo de enfermar y morir; derivado de sus condiciones biológicas, sociales, económicas y culturales (...).*” En la parte resolutive adicionalmente se ordenó el recobro al Fosyga.

## **II. Pruebas decretadas por la Sala de Revisión**

Además de las pruebas solicitadas en cada proceso, se solicitaron algunas pruebas adicionales dirigidas a los órganos responsables de regular, controlar y dirigir el sistema de salud en Colombia y de velar por la aplicación del derecho a la salud, con la finalidad de obtener información relacionada con el ejercicio de las funciones de estas autoridades.

El primer auto de pruebas generales fue proferido el 12 de julio de 2006. La Sala de Revisión solicitó las siguientes pruebas,

*“Quinto.- ORDENAR a la Superintendencia Nacional de Salud, por intermedio de la Secretaria General, que en el término de diez (10) días hábiles contados a partir de la notificación del presente auto, responda por escrito las siguientes cuestiones:*

*(i) Informar a la Sala Tercera de Revisión de la Corte Constitucional cuál ha sido el seguimiento que se ha hecho del cumplimiento de las obligaciones de las entidades encargadas de*

*asegurar y prestar el servicio de salud a las personas en el Sistema de Salud. Específicamente, indicar cuáles entidades de aquellas que son controladas han sido frecuentemente demandadas — especialmente mediante acciones de tutela— y condenadas por incumplir sus servicios en los últimos 3 años, así como también, las medidas que la Superintendencia ha tomado para evitar esta situación.*

*(ii) ¿Cuál es el balance general de las acciones de tutela interpuestas contra las entidades bajo su control y vigilancia para acceder a servicios de salud negados o no autorizados? ¿Cuáles son las estadísticas con las que al respecto se cuenta? ¿Cuáles son las fuentes que se tienen para obtener esta información? Además, señalar si las órdenes impartidas por los jueces de tutela se están cumpliendo o no. ¿Cuántas entidades condenadas mediante acción de tutela por violar los derechos de los usuarios son adicionalmente perseguidas mediante incidentes de desacato, por no cumplir las órdenes impartidas por los jueces de tutela? ¿Qué medidas ha tomado la Superintendencia Nacional de Salud al respecto de los casos reiterados de desacatos?*

*(iii) Concretamente, remitir a la Sala Tercera de Revisión de la Corte Constitucional el formato definido por la Superintendencia para que las instituciones prestadoras de los servicios de salud reporten a la Superintendencia Nacional de Salud la información de personas que han demandado servicios, son trabajadores independientes y no se encuentran afiliados al régimen contributivo, de acuerdo con lo dispuesto en el Decreto 1703 de 2002. A su vez, indicar cuáles conclusiones surgen de esta información y qué acciones se han tomado al respecto.*

*(iv) Indicar qué otras medidas ha adoptado la Superintendencia Nacional de Salud para evitar que las personas tengan que interponer acciones de tutela para poder acceder a los servicios de salud, especialmente cuando el servicio sí está incluido en el POS o, si no lo está, existe un trámite para que sea autorizado.*

*(v) ¿Cumplen las curadurías cabalmente el deber de aviso a la Superintendencia Nacional de Salud impuesto por el artículo 25 del Decreto 1703 de 2002? ¿Qué investigaciones se han adelantado y qué sanciones se han impuesto en virtud de dicha información? En caso de que esta obligación no se cumpla, indicar claramente las razones de por qué esto es así y qué medidas se están adoptando para que no continúe este incumplimiento.*

*Sexto.- ORDENAR, por medio de la Secretaría General, al Ministerio de la Protección Social que en el término de diez (10) días hábiles contados a partir de la notificación del presente auto,*

*responda por escrito las siguientes cuestiones:*

*(i) ¿Qué acciones concretas ha adelantado el Ministerio de la Protección Social para centralizar el manejo de información en el Sistema General de Seguridad Social en Salud, en especial para efectos de la afiliación, desafiliación y movilidad en el sistema por parte de los usuarios, de acuerdo con el artículo 13 del Decreto 1702 de 2002? Si no se han tomado acciones al respecto indicar detalladamente (1) por qué no se han adoptado, (2) cuáles van a ser tomadas y (3) cuándo.*

*(ii) Indicar si el Ministerio cumplió con la orden legislativa prevista en el artículo 2° de la Ley 828 de 2003 de crear un “validador de afiliaciones” en las condiciones allí señaladas. En caso de que no se haya cumplido el mandato legal, indicar de forma detallada qué han hecho hasta el momento los Ministerios de Hacienda y de Protección Social al respecto y cuál es la fecha en la que se va a cumplir con dicha orden legal de forma íntegra.*

*(iii) Indicar cómo se ha dado cumplimiento a la orden legislativa prevista en el artículo 3° de la Ley 828 de 2003 de controlar a las empresas de servicios temporales en las condiciones allí señaladas. Indicar cuáles medidas han sido adoptadas en cumplimiento de esta disposición y cuál ha sido el resultado de las mismas.*

*(iv) Indicar cómo ha desarrollado la restricción administrativa de imponer ‘control previo’ a las entidades incumplidas y en qué casos específicos ha sido impuesto, de acuerdo con lo dispuesto con la Ley 828 de 2003. En caso de no haber desarrollado el mandato legal, indicar la causa de esta omisión, así como el número de las entidades que, de acuerdo con los datos con que actualmente se cuenta, deberían ser sometidas a un control previo.*

*(v) Indicar si las entidades administradoras del sistema de salud están reportando dentro de los primeros cinco (5) días hábiles de cada mes a las Cámaras de Comercio de su jurisdicción, los proponentes que se encuentran en mora por el pago de las obligaciones parafiscales, como lo exige la Ley 828 de 2003. Indicar también, cuál ha sido el desarrollo reglamentario que se le ha dado a esta medida.*

*(vi) Conforme a lo dispuesto en el artículo 5° de la Ley 828 de 2003, indicar cómo se reglamentaron “los términos y condiciones a que se deben sujetar los convenios de pago que celebre el ICBF, el SENA, las ARP y las EPS a efecto de evitar una desviación de recursos de la seguridad social y garantizar en forma plena su recaudo”.*

*(vii) Indicar cómo se ha reglamentado e implementado la creación de un sistema de pagos, vía electrónica, para el sistema de seguridad social, en especial en salud, de acuerdo con lo dispuesto en el artículo 10° de la Ley 828 de 2003.*

*(viii) ¿Todas las EPS y ARS cuentan con un Comité Técnico Científico vigente y funcionando? ¿Cuál es el porcentaje de los casos en los que se ha llegado a interponer una acción de tutela para reclamar un servicio de salud, cuyo reconocimiento ha debido darse a través del Comité Técnico Científico? ¿Qué efecto tienen para una EPS o una ARS el hecho de haber sido condenada por un servicio que ha debido garantizar? ¿Qué consecuencias jurídicas económicas o de otra índole, se siguen para la entidad de salud respectiva en estos casos?*

*(ix) ¿Cuál es la razón por la que en gran número de casos las entidades encargadas del servicio de salud se niegan a autorizar o reconocer servicios que sí están incluidos en los Planes Obligatorios de Salud? (para responder, distinguir si se trata del régimen subsidiado o contributivo y si la entidad es pública o privada) ¿Qué medidas se adoptan en estos casos para evitar que esta situación siga ocurriendo?*

*(x) ¿Del número total de acciones de tutela en las que un juez de la República ha ordenado que se garantice el acceso a un servicio de salud, durante los últimos cinco (5) años, en cuántos casos los accionantes han tenido que interponer un incidente de desacato por el incumplimiento de la orden judicial? ¿Qué medidas se han adoptado con aquellas instituciones que son condenadas por incumplir sus obligaciones constitucionales y legales, y, luego, son nuevamente condenadas por incumplir las órdenes judiciales que conminaron a cumplir con dichas obligaciones?*

*(xi) ¿Cuál es el costo concreto que representa para el Sistema de Salud que los servicios constitucionalmente amparados a los usuarios deban ser reclamados mediante acción de tutela? Para el efecto, valorar los diferentes aspectos relevantes, tales como, los recursos humanos y materiales que utilizan las EPS, las ARS, las entidades territoriales, el Ministerio de la Protección Social y el sistema judicial. Ofrecer al respecto datos y cuentas específicas.*

*(xi) ¿Qué medidas concretas han sido adoptadas para evitar que los servicios de los usuarios tengan que ser reclamados mediante acciones de tutela? ¿Cuáles son las entidades promotoras del servicio de salud que incurren en esta práctica y qué medidas han sido adoptadas, específicamente para cada uno de estos casos?*

*(xii) ¿Cómo se verifica que las entidades cumplan con el trámite*

*ante el Comité Técnico Científico de su entidad, en los casos en los que éste corresponda?*

*(xiii) Existe un trámite para solicitar los medicamentos que se necesiten y que no estén contemplados dentro del POS. ¿Por qué no se ha creado un proceso similar para tramitar los reclamos de todos los demás servicios que sean distintos a medicamentos, en las ocasiones en que sean necesarios para conservar la vida o la integridad de las personas y éstas no puedan acceder a dichos servicios por sus propios medios?*

*(xiv) ¿Se han impuesto restricciones a las transferencias para la ampliación de la cobertura en salud, a aquellos entes territoriales que no celebran los respectivos convenios con la red de prestadores para la atención de la población pobre en lo no cubierto con subsidio a la demanda, conforme a la Ley 715 de 2001? Qué medidas se han adoptado para hacer el seguimiento de la prestación de los servicios de salud a la población vinculada al sistema de salud.*

*Séptimo.- ORDENAR, por medio de la Secretaría General, al Ministerio de Hacienda y Crédito Público que en el término de diez (10) días hábiles contados a partir de la notificación del presente auto, responda por escrito las siguientes cuestiones,*

*(i) Considera el Ministerio de Hacienda y Crédito Público que el flujo de fondos del Sistema de Salud, tanto en el régimen contributivo como en el subsidiado, vienen operando con regularidad, es decir, con estándares de eficiencia y oportunidad conforme los plazos previstos en las normas legales. Explique detalladamente la respuesta, indicando qué acciones se deberían o podrían adoptar para mejorar esta situación.*

*(ii) Teniendo en cuenta que el Consejo Nacional de Seguridad Social en Salud es el administrador del FOSYGA, indicar si a criterio del Ministerio de Hacienda y Crédito Público está funcionando plenamente la base única de datos que se opera desde dicho fondo (FOSYGA).*

*Octavo.- ORDENAR, por medio de la Secretaría General, al Ministerio de la Protección Social y al Ministerio de Hacienda y Crédito Público que en el término de diez (10) días hábiles contados a partir de la notificación, responda por escrito las siguientes cuestiones,*

*(i) Se solicita a cada Ministerio, por separado, indicar si existen facultades legales o reglamentarias en cabeza de organismos diferentes al Consejo Nacional de Seguridad Social en Salud para*

*definir el Plan Obligatorio de Salud, POS, o interpretar sus contenidos. En caso de dar una respuesta afirmativa, hacerlo de forma precisa y detallada.*

*(ii) Indicar cuáles son los referentes tarifarios, si existen, empleados para reconocer el costo de servicios de salud autorizados por ser necesarios y que no se encuentran contemplados en el Plan Obligatorio de Salud (POS y POS-S).*

*(iii) ¿Qué disposiciones legales o reglamentarias deberían ser modificadas, habida cuenta de su inaplicación general dentro de los procesos de acción de tutela? ¿Qué cambios legales o reglamentarios se requerirían para asegurar el cumplimiento de la misma y garantizar, de manera más plena, los derechos de los usuarios?*

*(iv) ¿Existe plena claridad entre los distintos órganos del Estado y entidades privadas que actúan en el sector de la salud, respecto a cuáles son los contenidos del Plan Obligatorio de Salud? ¿Esta información está a disposición de cualquier usuario del Sistema? En caso de presentarse desacuerdos, indicar cuáles son los principales y por qué se presentan? ¿Cuál es la entidad que determina, en último término qué está contenido y qué no en el POS (y el POS-S)? ¿Cuál es el procedimiento para que una persona, una entidad del estado o una entidad del Sistema de Salud, solicite que se le aclare una duda respecto a la inclusión o no de un servicio dentro del POS (y POS-S)? ¿Es el mismo procedimiento para todos los casos o son diferentes? ¿Qué consecuencia jurídica se sigue para una entidad que siga alegando que un servicio no está incluido luego de que la autoridad respectiva ha señalado que sí lo está?*

*Noveno.- ORDENAR, por medio de la Secretaría General, a la Defensoría del Pueblo que en el término de diez (10) días hábiles contados a partir de la notificación de este auto, responda por escrito las siguientes cuestiones,*

*(i) Informar a la Corte Constitucional las evaluaciones que la Defensoría del Pueblo haya realizado con relación a los siguientes aspectos, indicando de forma precisa los problemas encontrados, así como las medidas de solución con que se cuenta o que se proponen.*

*(ii) Análisis del incremento de acciones de tutela para el reclamo de la prestación de servicios de salud indicando los porcentajes de los distintos tipos de casos que son resueltos (en especial, indicar cuántas se presentan para reclamar servicios incluidos en el POS que no tienen requisitos de semanas de cotización, cuántas para*

*reclamar servicios que sí tienen tal requisito y cuántas para servicios no son contemplados en el POS).*

*(iii) Análisis del proceso de recobro ante el FOSYGA, indicando si es siempre igual, o si varía dependiendo, por ejemplo, de si se trata de un servicio no incluido en el POS ya antes solicitado para casos similares. Indicar si se trata de un trámite claro y ágil que asegura la adecuada prestación del servicio de salud y el pago oportuno a las EPS o si tiene problemas al respecto. En tal caso, indicar de forma específica cuáles son las dificultades y cuál es su impacto en la adecuada prestación del servicio de salud.*

*(iv) Análisis del trámite que surten las EPS, las ARS y las respectivas IPS a las órdenes de sus médicos tratantes, cuando estos consideran que una persona necesita un tratamiento o un medicamento no contemplado en el POS para mantener su vida y su integridad y carece de los recursos necesarios para costearse. Indicar especialmente si la responsabilidad de iniciar estos trámites es “trasladada al usuario”, como expresamente se prohíbe. En caso de ser así, indicar qué medidas han tomado los órganos encargados del control y vigilancia del sector de la salud para evitar esta práctica.*

*(v) Balance general del acceso de los usuarios a los servicios de salud requeridos en condiciones de oportunidad y calidad. Indicar cuáles son los problemas que al respecto existen y cuáles son las medidas que se podrían adoptar para contrarrestarlos.*

*Décimo.- ORDENAR, por medio de la Secretaría General, al Consejo Nacional de Seguridad Social en Salud que en el término de diez (10) días hábiles contados a partir de la notificación, responda por escrito las siguientes cuestiones [la primera pregunta también deberá ser remitida por la Secretaria General al Ministerio de la Protección Social, con las anteriores remitidas a esta entidad],*

*(i) ¿Cuáles son los 15 medicamentos no contemplados por el POS que con mayor frecuencia han sido objeto de recobro ante el FOSYGA en los últimos 5 años? ¿Qué porcentaje del costo total de los recobros ante el FOSYGA, por medicamentos y en general, representan los referidos medicamentos? Presentar la información completa y discriminada por años.*

*(ii) ¿Cuáles son los 10 servicios diferentes a medicamentos no contemplados por el POS que con mayor frecuencia han sido objeto de recobro ante el FOSYGA en los últimos 5 años? ¿Qué porcentaje del costo total de los recobros ante el FOSYGA, por servicios médicos diferentes a medicamentos y en general, representan?*

*Presentar la información completa y discriminada por años.*

*(iii) ¿Por qué los medicamentos y los procedimientos relacionados en las dos preguntas anteriores no han sido incluidos dentro del POS?*

*(iv) ¿Cuántas veces se han modificado integralmente los contenidos de los Planes Obligatorios de Salud (régimen contributivo y subsidiado)? ¿Cuántas veces se han modificado parcialmente? ¿Cuáles servicios y cuándo, específicamente, han sido incluidos o excluidos de los Planes Obligatorios de Salud? ¿Existe un procedimiento de verificación periódica de los contenidos de los servicios contemplados en el Plan Obligatorio de Salud? ¿Cuál es? En caso de no existir, indicar por qué no se ha instituido tal procedimiento, así como cuándo se va a reglamentar y cómo va a ser.*

*(v) En la actualidad existe un procedimiento establecido para que los usuarios reclamen ante la entidad un servicio de salud necesario para salvaguardar su vida o su integridad que no está incluido dentro del POS, cuando se trata de un medicamento, pero no cuando se trata de otra clase de servicio (tratamientos, cirugías, exámenes, etc.). ¿Cuál es el procedimiento que debe seguir un usuario para solicitar la prestación de servicios diferentes a 'recibir un medicamento'? ¿En caso de que la respuesta sea negativa, por qué no se ha establecido un procedimiento para solicitar ante las entidades encargadas dichos servicios? ¿Cuándo se va a reglamentar y cómo se va a hacer esto?*

*(vi) ¿Cuántos estudios se han realizado, desde una perspectiva médica y una perspectiva financiera, de los contenidos del POS y el POS-S, desde el inicio de la reforma (1993) hasta el momento? ¿Cuáles han sido las conclusiones al respecto? ¿Cómo han evolucionado dichas conclusiones con el paso de los años?*

*(vii) ¿Cuál es la justificación para que el Comité Técnico Científico tenga restringida su competencia a medicamentos y no pueda pronunciarse acerca de otro tipo de servicios de salud no incluidos en el POS (o el POS-S)?*

*(viii) ¿Puede una entidad encargada de garantizar la prestación del servicio de salud negarse a autorizar un servicio específico que requiere una persona para proteger su vida o su integridad personal, cuando la orden la expidió un médico reconocido y afiliado al Sistema de Salud, pero que no está adscrito a la entidad de la cual la persona es afiliada o beneficiaria, así la negativa se adopte sin contar con respaldo médico y clínico?*

*(ix) ¿Existe una difusión suficiente de los contenidos de las normas legales que consagran los derechos de los usuarios del Sistema de Salud? En caso de ser negativa la respuesta indique por qué, qué medidas se han tomado al respecto y cuáles van a tomarse o podrían tomarse.*

*(x) ¿Ha analizado el CNSSS el flujo de fondos en el Sistema de Seguridad Social en Salud, tanto en el régimen contributivo como en el régimen subsidiado, con relación al cumplimiento pleno y oportuno del FOSYGA de sus obligaciones de giro en el régimen contributivo, en el régimen subsidiado y en el sistema excepcional de reembolsos por prestaciones no incluidas en el POS?*

*(xi) Indicar cuáles son los plazos en los que los diferentes actores que intervienen, tanto en el flujo del régimen contributivo como en el régimen subsidiado, reciben los recursos, y los plazos en que los deben transferir (Ministerios de Hacienda, Ministerio de la Protección Social, FOSYGA, entes territoriales, ARS, EPS, etc).*

*(xii) ¿Cuál es la proyección de egresos para el FOSYGA para el año 2006 conforme las tendencias de desembolsos por prestaciones no incluidas por el POS, de acuerdo con el derecho de reembolso que tienen los diferentes actores, como consecuencia de decisiones de comités técnicos científicos y de fallos de tutela? ¿Cuál ha sido la evolución del monto que se ha pagado por este concepto a lo largo de los últimos cinco (5) años? (Distinguir entre las decisiones del Comité Técnico Científico y las de los jueces de tutela)*

*(xiii) Indicar a la Sala Tercera de Revisión de la Corte Constitucional por qué se reconoce a la respectiva entidad encargada de asegurar la prestación de salud un porcentaje del valor de un servicio no incluido en el POS, cuando es reconocido por el Comité Técnico Científico, y el 100% cuando fue ordenado por acción de tutela, pero previamente negado por el Comité Técnico Científico, según el artículo 19 de la Resolución 3797 de 2004 del Ministerio de la Protección Social?”*

Ante esta solicitud fueron allegados a este despacho escritos provenientes de diferentes entidades absolviendo las preguntas formuladas por la Sala:

- Superintendencia de Salud (folios 39 a 125, cuaderno uno, expediente T-1320406). Intervino el Superintendente de Salud Cesar Augusto López Botero que además de la respuesta a las preguntas formuladas por la Sala, anexó una relación de los Actos Administrativos de sanción a EPS suscritos por esa entidad, una relación de los Actos Administrativos de sanción a IPS suscritos por esa entidad y una relación de los Actos Administrativos de sanción a empleadores suscritos por esa entidad; una columna publicada por Cesar Augusto

López Botero: La Superintendencia Nacional de Salud a la vanguardia de las nuevas tecnologías; una relación del manejo de las llamadas de atención al usuario del año 2006.

- Ministerio de Protección Social (folios 127 a 263, cuaderno uno, expediente T-1320406). Intervino Alba Valderrama de Peña en calidad de Jefe de la Oficina de Apoyo Legislativo que además de la respuesta a las preguntas formuladas por la Sala, anexó una relación de las Empresas de Servicios Temporales investigadas por esa entidad, un listado de las visitas a Empresas de Servicios Temporales para control de evasión y elusión y las Resoluciones en las que se sancionaba alguna Empresas de Servicios Temporales. Posteriormente el Ministerio de la Protección Social, suscrito por el Ministro Diego Palacio Betancurt, allegó un completo estudio sobre el sistema de salud llamado *Intervención del Ministerio de la Protección Social ante la Corte Constitucional en materia del Derecho a la Salud* con diez anexos, basado, entre otros textos, en un minucioso estudio de la jurisprudencia constitucional elaborado por el jurista Eduardo Cifuentes Muñoz.
- Ministerio de Hacienda y Crédito Público (folios 263 a 292, cuaderno uno, expediente T-1320406). Intervino el Ministro Alberto Carrasquilla Barrera que respondió cada una de las preguntas formuladas por la Sala.
- Defensoría del Pueblo (folios 277 a 285, cuaderno uno, expediente T-1320406). Intervino el Defensor del Pueblo encargado, Darío Mejía Villegas, que además de la respuesta a las preguntas formuladas por la Sala, anexó dos libros: *La tutela y el derecho a la salud* y *Evaluación de los servicios de salud que brindan las empresas promotoras de salud 2005*. Adicionalmente anexó copia de las comunicaciones del 3 de octubre y 21 de noviembre de 2005, dirigidas al Ministerio de la Protección Social.
- Ministerio de Protección Social a nombre del Consejo Nacional de Seguridad Social en Salud (folios 294 a 315, cuaderno uno, expediente T-1320406) bajo la advertencia de que *“el Consejo, es un órgano colegiado y que por razones de agenda dichas respuestas no fueron discutidas y analizadas por los consejeros”*

Ninguna de estas respuestas se transcribe en razón de su extensión, pero sus textos son referenciados en los apartes pertinentes de la providencia.

Posteriormente, mediante auto proferido el 11 de febrero de 2008, se solicitaron nuevamente algunas pruebas pero relacionadas específicamente con diversos aspectos del proceso de recobro ante el Fosyga y vincular a nuevas autoridades. En la parte resolutive se indicó:

*Primero.- Ordenar a la Secretaría General de esta Corporación que ponga en conocimiento de la Comisión de Regulación en Salud y*

*del Consorcio Fidufosyga 2005 el contenido de los expedientes de tutela T-1.645.295 y T- 1.646.086, acumulados al expediente T-1.281.247, para que dentro de los tres (3) días siguientes a la notificación del presente Auto, dichas entidades se pronuncien acerca de las pretensiones y del problema jurídico que plantean las aludidas acciones de tutela.*

*Segundo.- Ordenar a la Secretaría General de esta Corporación que ponga en conocimiento del Ministerio de Protección Social y del Consejo Nacional de Seguridad Social en Salud, el contenido de los expedientes de tutela T-1.645.295 y T- 1.646.086, acumulados al expediente T-1.281.247, para que dentro de los tres (3) días siguientes a la notificación del presente Auto, dichas entidades, además de lo que ya han aportado al presente proceso, indiquen si desean pronunciarse o aportar información adicional en relación el problema jurídico que plantean las aludidas acciones de tutela.*

*Tercero.- ORDENAR a la Secretaría General de esta Corporación que adicionalmente, solicite a la Comisión de Regulación en Salud, que en el término de tres (3) días, se sirva informar a esta Sala:*

*1. El artículo 19, de la Resolución 3797 de 2004, ordena el reconocimiento del 100% del costo del medicamento por parte del Fosyga cuando un juez de tutela ordena su suministro y el Comité Técnico Científico lo ha negado previamente; por el contrario si el Comité Técnico Científico lo ordena directamente se reconoce sólo el 50% del costo del medicamento. Además de éste, qué otros incentivos y desincentivos económicos ha establecido la regulación para estimular o desestimular la presentación de acciones de tutela que ordenan los recobros de las EPS al Fosyga. (Indicar la evolución de la fuente legal y de regulación). Adicionalmente, señalar su a su juicio tales reglas están:*

*a. ¿Promoviendo el goce efectivo de los derechos de los usuarios cuando requieren servicios médicos excluidos del POS?*

*b. ¿Garantizando el flujo efectivo de recursos para asegurar la sostenibilidad y el goce de los derechos de los usuarios?*

*c. ¿Cuáles son los requisitos que debe cumplir una EPS para el recobro ante el Fosyga y cómo debe probar su cumplimiento?*

*d. ¿A partir de qué momento se entiende, según la regulación, que una sentencia de tutela ha quedado ejecutoriada para efectos de la solicitud de recobro al Fosyga. Indicar la fuente legal o reglamentaria?*

*Cuarto.-. ORDENAR a la Secretaría General de esta Corporación*

*que solicite al Consejo Nacional de Seguridad Social en Salud, que en el término de tres (3) días, se sirva informar a esta Sala:*

*El artículo 19, de la Resolución 3797 de 2004, ordena el reconocimiento del 100% del costo del medicamento por parte del Fosyga cuando un juez de tutela ordena su suministro y el Comité Técnico Científico lo ha negado previamente; por el contrario si el Comité Técnico Científico lo ordena directamente se reconoce sólo el 50% del costo del medicamento. Además de éste, qué otros incentivos y desincentivos económicos ha establecido la regulación para estimular o desestimular la presentación de acciones de tutela que ordenan los recobros de las EPS al Fosyga. (Indicar la evolución de la fuente legal y de regulación). Adicionalmente, señalar su a su juicio tales reglas están:*

*¿ Promoviendo el goce efectivo de los derechos de los usuarios cuando requieren servicios médicos excluidos del POS?*

*¿Garantizando el flujo efectivo de recursos para asegurar la sostenibilidad y el goce de los derechos de los usuarios?*

*¿Cuáles son los requisitos que debe cumplir una EPS para el recobro ante el Fosyga y cómo debe probar su cumplimiento.*

*¿A partir de qué momento se entiende, según la regulación, que una sentencia de tutela ha quedado ejecutoriada para efectos de la solicitud de recobro al Fosyga. Indicar la fuente legal o reglamentaria?*

*Quinto. -. ORDENAR a la Secretaría General de esta Corporación que adicionalmente, solicite al Consorcio Fidufosyga 2005, que en el término de tres (3) días, se sirva informar a esta Sala:*

*En los procesos de recobros con ocasión de órdenes emitidas en fallos de tutela, en qué momento ha entendido el Consorcio Fidufosyga 2005 que el fallo se encuentra ejecutoriado para efectos de tramitar la solicitud de reembolso. Indicar si los jueces de tutela aplican el mismo criterio, y qué procedimiento aplica el Consorcio Fidufosyga 2005 cuando un juez considera ejecutoriada la sentencia de tutela en un momento procesal diferente.*

*En caso de tener el Consorcio Fidufosyga 2005 un criterio propio con relación la momento en que se entiende ejecutoriada la sentencia de tutela, indique cuál es dicho criterio y cuál es el sustento normativo del mismo.*

*Indicando los datos estadísticos, cuánto tiempo, en términos reales, se demora en promedio la petición de recobro ante el Fosyga en ser*

*aprobada y cuánto tiempo se demora, a partir de su aprobación, en ser girado el dinero correspondiente. Indicar si se están cumpliendo los plazos fijados, sea por los jueces o por la regulación. Indicar las causas de las demoras y señalar cuáles de ellas son las principales.*

*Cuántos recobros están pendientes de ser aprobados y cuántos recobros aprobados se encuentran pendientes de ser girados. Señalar las fechas distinguiendo mes y año, así como el monto total de recursos reclamados por las EPS, aprobados y pendientes de giro.*

*Cuál es el porcentaje de aprobaciones de recobro y de rechazos de peticiones de recobro (totales o parciales) y cuál es la principal razón de los rechazos.*

Ante esta solicitud fueron allegados a este despacho escritos provenientes de diferentes entidades absolviendo las preguntas formuladas por la Sala:

- Ministerio de Protección Social (folios 22 a 43, cuaderno uno, expediente T-1645295). Intervino Nelly Patricia Ramos Hernández en calidad de jefe de la oficina jurídica y de Apoyo Legislativo absolviendo las preguntas formuladas por la Sala.
- Fidufosyga 2005 (folios 45 a 59, cuaderno uno, expediente T-1645295).

Tampoco estas respuestas se transcribirán en razón de su extensión, pero sus textos son referenciados en los apartes pertinentes de la providencia.

En este despacho, además de los anteriores, se recibieron documentos adicionales:

- La Asociación Colombiana de Empresas de Medicina Integral, ACEMI, remitió un escrito llamado *Aspectos relevantes en materia de salud como derecho fundamental y su impacto en las aseguradoras privadas (EPS)* (folios 98 a 134, cuaderno uno, expediente T-1281247)
- La Asociación Colombiana de Empresas de Medicina Integral, ACEMI, remitió un estudio suscrito por Alberto Carrasquilla llamado *El Régimen Contributivo en el sistema de salud en Colombia: situación actual, perspectivas y desafíos* (folios 130 a 168, cuaderno uno, expediente T-1281247)

## **Segundo Anexo**

En aras de la pedagogía constitucional, se presentará la evolución del derecho a la salud en los principales instrumentos internacionales y regionales de derechos humanos. Esta genealogía muestra que definir el derecho a la salud como derecho fundamental es compatible con el lugar y la trascendencia de éste derecho en el ámbito internacional y regional.

### **El derecho a la salud a la luz de los sistemas de protección de derechos humanos, internacional e interamericano**

El derecho a la salud es una garantía ampliamente reconocida en el derecho internacional de los derechos humanos, así como también, en los sistemas regionales de protección. La fundamentalidad e importancia del derecho a la salud dentro de los derechos humanos ha sido reconocida expresamente por el órgano competente para interpretarlo, y se refleja en el lugar que éste ha ocupado en la génesis y desarrollo del sistema internacional de protección a los derechos humanos. El derecho al disfrute del más alto nivel posible de salud (PIDESC, art. 12) está estrechamente vinculado a la dignidad humana y es presupuesto del goce efectivo de buena parte de los demás derechos fundamentales.

En la medida en la que el Constituyente de 1991 consideró que ‘los derechos’ y ‘los deberes’ consagrados en la Constitución Política de Colombia deben interpretarse ‘de conformidad con los tratados internacionales sobre derechos humanos ratificados por Colombia’ (CP, art. 93), es preciso exponer el contenido y alcance de dichos tratados. Para presentar la génesis y desarrollo del derecho a la salud, se tendrán en cuenta los diversos instrumentos de derecho internacional acordados o proferidos a lo largo de cuatro momentos. El primero, la aparición de las primeras declaraciones de derechos, las cuales se proferían en contextos nacionales, por lo general, de intensos cambios políticos. Se trata de un extenso periodo de tiempo, que va desde los últimos años del siglo XVIII, durante las revoluciones burguesas que producen las primeras declaraciones de derechos, hasta la mitad del siglo XX. El segundo momento es el lapso durante el cual se crea la Carta Internacional de Derechos Humanos. Va desde el final de la segunda guerra mundial, 1948, año de la Declaración Universal hasta finales de la década de los sesenta, años en los que se adoptaron los Pactos Internacionales de Derechos Civiles y Políticos, y de Derechos Económicos, Sociales y Culturales. En este periodo se dan también las declaraciones interamericana y europea de derechos humanos, y se fundan las bases de estos dos sistemas regionales de protección de los derechos. El tercer periodo es en el cual entra en vigor la Carta Internacional de Derechos Humanos (1976) y se crean los instrumentos de protección en el sistema interamericano de derechos humanos, está comprendido por las décadas de los años setenta y de los años ochenta. El cuarto y último periodo, es en el cual los órganos encargados de interpretar y monitorear el

cumplimiento de las obligaciones emanadas de los pactos de derechos humanos, se han pronunciado acerca de la interpretación y el alcance de los derechos y deberes de dichas disposiciones.

La reconstrucción que se hace a continuación, resalta algunos de los principales momentos del desarrollo del derecho a la salud, uno de los derechos económicos, sociales y culturales, con el objeto de evidenciar el carácter fundamental que se le ha reconocido.

## **1. Las primeras declaraciones de derechos**

1.1. *Las declaraciones estadounidenses y francesas de derechos del siglo XVIII buscaban defender de forma prioritaria, pero no exclusiva, la libertad individual; el bienestar general también era su propósito.*

1.1.1. La Declaración de los Derechos del Hombre y del Ciudadano de 1789, de la Asamblea Nacional francesa, y la Constitución de los Estados Unidos de América de 1787, junto con sus posteriores enmiendas (en especial las diez primeras, que conforman la ‘carta de derechos’ –*bill of rights*, 1791–), son los textos normativos paradigmáticos que fundan, en el siglo XVIII, la tradición de protección de derechos humanos en los sistemas jurídicos occidentales. Estas primeras declaraciones de derechos, vinculadas históricamente, fijan los presupuestos de los estados de derecho democráticos modernos, al instituir un poder estatal público, dividido y balanceado; limitado en sus medios y fines mediante reglas democráticas, generales y previas, que garanticen la protección de los derechos que le son ‘*proprios*’ a cada ‘*persona*’.

1.1.2. Estas declaraciones son generosas en la protección de los derechos civiles y políticos de los individuos, llamados también ‘*derechos de libertad*’, y por eso se les ha caracterizado como ejemplos clásicos de ser textos normativos que consagran derechos de la ‘*primera generación*’. No obstante, el que los revolucionarios franceses y estadounidenses centraran su atención en la defensa de ‘la libertad’ y de los derechos civiles, de ninguna manera implica que tuvieran el propósito de construir una República que no estuviera comprometida con el ‘*bienestar*’ y la ‘*felicidad*’ del pueblo.

1.1.3. La Constitución estadounidense se propuso para asegurar los ‘*beneficios de la Libertad*’, pero también para ‘*promover el bienestar general*’. En la declaración de independencia del 4 de julio de 1776 se establecieron como inalienables, entre otros derechos, ‘*la vida, la libertad y la búsqueda de la felicidad*’, reconociendo el derecho a cambiar el gobierno si desconoce tales mandatos. Según la *Declaración de los derechos del Hombre y del Ciudadano* (1789) aprobada en Francia, el objeto de ‘*toda asociación política*’ es la conservación de los derechos ‘*naturales e imprescriptibles del hombre*’, incluyendo entre ellos no sólo ‘*la libertad*’, sino también los derechos a ‘*la propiedad, la seguridad y la resistencia a la opresión*’. Cuatro años después, en 1793, la Convención aprobó una nueva *Declaración de los Derechos del Hombre y del Ciudadano*. Esta segunda versión estableció en su primer

artículo que *‘el fin de la sociedad es la felicidad común’*, reiterando que el *‘gobierno ha sido instituido para garantizar al hombre el goce de sus derechos naturales e imprescriptibles’*. La Declaración de 1793 contempla que la sociedad *‘debe la subsistencia a los ciudadanos desgraciados’* (artículo 21), y contempla la *‘garantía social’* como *‘la acción de todos para asegurar a cada uno el goce y la conservación de sus derechos’*, garantía que *‘reposa sobre la soberanía nacional’* (artículo 23). La existencia de obligaciones públicas asistenciales ya había sido reconocida por doctrinantes como Montesquieu, quien desaconsejaba en general la institucionalización de la asistencia, pero la defendía en los casos que se requería para *‘atajar la miseria’* y evitar *‘padecimientos’* o *‘sublevaciones’*. Al poco tiempo, en 1795, Francia aprobó una tercera versión de la *Declaración*, en la que se restringieron algunos derechos, en especial, los de *‘carácter social’* reconocidos en la segunda versión de 1793.

1.1.4. La visión purista de las primeras declaraciones de derechos, según la cual éstas se concentran en libertades negativas que sólo requieren la *abstención* del Estado. Esta aproximación conceptual a la clasificación de los derechos, según la cual las libertades sólo demandan abstención y las garantías sociales requieren la acción del estado, ha sido objeto de fuertes críticas, que la Corte Constitucional ha reconocido y hecho suyas en su jurisprudencia. Esta ,lugar entre los jueces de la Corte Interamericana de Derechos Humanos.

## 1.2. *Las declaraciones en el contexto latinoamericano pensaron en el bienestar social*

1.2.1. En el contexto latinoamericano, las declaraciones estadounidenses y francesas de derechos humanos fueron determinantes para propiciar los procesos independentistas. Desde el inicio del discurso revolucionario, las preocupaciones por la defensa de la libertad individual y los límites del *‘poder’* se combinaron con las preocupaciones por organizar un *‘estado propio’*, capaz de tomar las medidas necesarias para garantizar las condiciones materiales que aseguraran la consolidación de un *‘nuevo régimen’* que respetara los derechos de los asociados, medidas que suponían por ejemplo, garantizar las condiciones de salud pública.

1.2.2. A lo largo del *Discurso* a los americanos de 1797 y sus notas a pie de página, se hace patente la particular lectura que se hacía en tierras latinoamericanas de los textos revolucionarios provenientes del norte. Así, por ejemplo, se apoya la necesidad de promover la *‘fraternidad’* y la *‘igualdad’* en la sociedad, pero advirtiendo el reto multicultural que suponía tener en cuenta la diversidad de culturas y razas de los pueblos americanos y las hondas diferencias que entre ellos había establecido el régimen colonial español. El *Discurso* a los americanos apoya la revolución, aclarando que ésta se debe hacer *‘material’*, es decir, *“que no es suficiente establecer otro sistema político”*, es necesario que la República adopte medidas para transformar efectivamente el mundo colonial. Este propósito, defendido en distintos grados por los revolucionarios americanos, supuso apoyar una visión de

República que no sólo tenía el deber negativo de abstenerse de interferir con la ‘libertad’ de los asociados, sino también el deber positivo de propiciar la existencia del nuevo régimen mediante acciones tales como tomar las medidas necesarias para crear nuevas costumbres en la sociedad o para crear un sistema educativo público y gratuito que garantizara la libertad. No obstante, las cuestiones referentes a la asistencia y los servicios de salud se entendían, en principio, como un asunto de dominio privado, relegado al socorro y misericordia de las personas, cuando se trataba de la salud de los que no tienen capacidad de garantizársela por sus propios medios. Sin embargo, para ese momento era claro que algunas de las dimensiones propias de la asistencia en salud tenían importantes repercusiones públicas, como era el caso de las epidemias, mal endémico en las tierras tropicales americanas.

### *1.3. Los derechos sociales en declaraciones posteriores, durante el siglo XIX y principios del siglo XX*

1.3.1. A mediados del siglo XIX, los llamados ‘*derechos sociales*’ aparecen de forma expresa en varios textos normativos, dentro del contexto de las revoluciones del 48 en Europa. La Constitución de la Segunda República de Francia en 1848 fue instituida en gran parte como respuesta a las protestas de los trabajadores, la ‘baja burguesía’ y los intelectuales, frente a la grave situación de crisis económica, desempleo (cierre de varias fábricas) y hambre generalizada. La Constitución francesa de 1848 representó avances importantes en los derechos de libertad, pues, reconoció, entre otras garantías, el sufragio universal masculino. Pero su principal avance fue en materia de garantías sociales, pues su artículo 13, además de reconocer derechos particulares para los trabajadores, la educación primaria y la educación profesional, estableció la protección de personas en necesidad, al indicar que la “sociedad (...) proporciona la asistencia a los niños abandonados, a los enfermos y a los ancianos sin medios económicos y que sus familias no pueden socorrer”. Se trató entonces, de una consagración clara y explícita de la obligación de proveer las necesidades básicas de aquellas personas que no pueden atender por sí mismas, en razón a su condición de debilidad, sus necesidades básicas.

1.3.2. Los movimientos higienistas que abogaban por la salud como un asunto público, vieron su discurso respaldado por epidemias que sufrió Europa, como la del cólera de 1848, que sólo en Inglaterra dejó más de 50.000 muertos. Epidemias como ésta, que también llegaron al país y causaron grandes estragos, afectaban la vida de las personas y la sociedad en general, perturbando ámbitos tan diversos como la guerra o el comercio. Estas situaciones permitieron a los defensores de la salud, posicionarla en el debate público y obtener apoyo para la promulgación de textos normativos, como ocurrió, por ejemplo, en el Reino Unido. Estas ideas tuvieron un especial desarrollo en Alemania, donde un grupo de médicos y cirujanos de Berlín partidarios de ideas similares, presentaron en 1849 un proyecto de ley para asegurar la salud mental y el desarrollo físico de todos los ciudadanos y controlar las enfermedades, es decir, garantizar la salud en condiciones de

*universalidad*. Posteriormente, bajo el gobierno de Bismarck, Alemania creó un seguro nacional de salud (1880) que se difundió rápidamente por Europa.

1.3.3. Durante el siglo XIX, la salud también fue un asunto de gran importancia en Colombia, pues las enfermedades afectaron de forma grave y negativa el desarrollo de la República. Al igual que en Europa, incluso los defensores de las libertades individuales y del establecimiento de un Estado mínimo estaban dispuestos a apoyar las políticas de salud e higiene pública para contrarrestar las epidemias, así tales políticas conllevaran restricciones a las libertades civiles básicas y demandaran notables acciones por parte del Estado. Se trató de un tema público cuya fundamentalidad estuvo por encima de las posiciones particulares de los partidos políticos liberal y conservador. De hecho, la salud fue objeto de regulación a finales del siglo XIX y principios del siglo XX, durante los gobiernos conservadores, y posteriormente en la década de los años treinta y primera mitad de la década de los años cuarenta, durante los gobiernos liberales. No obstante, en términos generales, a principios del siglo XX la atención en salud siguió siendo un asunto de dominio privado, entre otras razones, por ser este sector el propietario de los hospitales, dispensarios, hospicios, casas de refugio y asilos.

1.3.4. En el siglo XX, los derechos sociales comienzan a defenderse con mayor fuerza, y pasan a estar reconocidos clara y abiertamente por las constituciones. Tal es el caso de la Constitución Política de los Estados Unidos Mexicanos (1917) y la Constitución Alemana de la República de Weimar (1919).

1.3.5. En este mismo año 1919, al término de la primera guerra mundial, la Conferencia de Paz Constituyó la Organización Internacional del Trabajo (OIT), mediante el Tratado de Versalles. La razón primordial de su fundación era dar una respuesta adecuada a la grave situación de los trabajadores, quienes eran explotados sin consideración por su salud, su vida familiar y su progreso profesional y social. Se consideraba que la situación de ‘injusticia, miseria y privaciones para un gran número de seres humanos’ que generaban las injustas condiciones laborales que existían en el mundo para ese momento, constituía una ‘amenaza para la paz y armonía universales’. Estas situaciones se agravarían con el paso de los años y desembocarían en situaciones de pobreza y miseria más difíciles, que llevarían a miles de personas a ver gravemente afectada su existencia y la posibilidad de tener una vida digna. En efecto, las crisis financieras de las décadas de los años veinte y los años treinta, que llevaron a más personas a la situación de miseria, hicieron más patente la necesidad de proteger a las personas, en especial a aquellas más vulnerables e indefensas ante la adversidad social.

1.3.6. En la década de los años treinta, en Colombia se avanzó en el reconocimiento y protección de los derechos sociales, implantando por primera vez, por ejemplo, un modelo social de salud. Buena parte de las medidas que adoptó la OIT en sus primeros años de funcionamiento fueron incorporadas al sistema jurídico nacional, por los gobiernos que pretendían

ajustar la institucionalidad estatal a las nuevas funciones sociales que claramente se le confiaban. Entre otras medidas, el Estado Colombiano aprobó (1931) y ratificó (1933) los 26 convenios que la Organización Internacional del Trabajo, OIT, había adoptado hasta el momento, entre ellos, algunos referentes a la salud. En esta misma década, la reforma constitucional de 1936 transformó hondamente la concepción del Estado colombiano, imponiéndole a éste mayores deberes con las personas, lo cual supuso un compromiso institucional para garantizar los deberes y derechos sociales. La reforma definió que las autoridades de la República, además de estar instituidas para proteger a todas las personas residentes en Colombia, en sus vidas, honra y bienes, lo estaban para *‘asegurar el cumplimiento de los deberes sociales del Estado y de los particulares’*, y consagró expresamente el deber del Estado para asistir a aquellas personas incapaces de trabajar, que carezcan de recursos y de allegados con la obligación de ayudarlas. A mediados de la década de los cuarenta, la Constitución se reformaría entre otras razones, por ejemplo, para introducir la carrera judicial, contemplando beneficios sociales, ante una disminución en la capacidad laboral por razones de salud.

1.3.7. Al final de la segunda guerra mundial, en junio de 1945, se adoptó la Carta de la Organización de las Naciones Unidas. Aunque ésta no hace referencia explícita a la salud, reconoce en su preámbulo como uno de los propósitos centrales de la comunidad internacional, ‘promover el progreso social y a elevar el nivel de vida dentro de un concepto más amplio de la libertad’. Un año más tarde, la Constitución francesa de 1946 estableció en su preámbulo, además de reafirmar *“solemnemente los derechos y libertades del hombre y del ciudadano, consagrados por la Declaración de Derechos de 1789”*, que la Nación “[g]arantiza a todos, y en especial al niño, a la madre y a los trabajadores ancianos, la protección de su salud, de su seguridad material, de su descanso y de su tiempo libre” (acento fuera del texto original). Mandato reiterado posteriormente en la Constitución francesa de 1958.

#### 1.4. Conclusión

En ésta primera época del desarrollo del derecho a la salud, queda claro que ‘la salud’ no es un asunto estrictamente privado que pueda ser relegado a la suerte de cada individuo. La posibilidad de morir o sufrir graves daños a la integridad personal a causa de una epidemia o una enfermedad endémica, aun cuando se contara con recursos económicos suficientes para costearse buenos servicios de atención médica, llevó a que la salud se convirtiera en un asunto de gran importancia pública. A lo largo de estos años, la lucha por la higiene y la salubridad pública llevó a concebir la salud en un sentido amplio, es decir, se entendió que no se limita a la prestación de servicios médicos a las personas enfermas. Los alcantarillados públicos, el control de pantanos y estancamiento de aguas, la regulación y control sobre el comercio de alimentos, las condiciones en las que se realizan los trabajos, en especial en aquellos que pueden conllevar riesgos a la salud, la prevención de enfermedades con múltiples medidas profilácticas, las condiciones habitacionales y la educación

básica a toda la población son algunas de esas otras dimensiones que se ven íntimamente ligadas con la salud de las personas. En este sentido, se entendió también que la salud está estrechamente relacionada con infinidad de aspectos de la vida social, como por ejemplo los asuntos militares, el orden público, el desarrollo de la infraestructura nacional, el diseño urbanístico, la libre circulación de las personas, el ejercicio de algunas de las profesiones y ocupaciones y el comercio y la industria, en especial, lo referente a la producción y circulación de alimentos. En esta primera etapa del desarrollo del derecho, queda claro que la salud es un asunto que no sólo debe ser competencia de las naciones individualmente, sino de las naciones desde una perspectiva internacional. Es por ello que se inicia el desarrollo de alianzas y convenios entre diferentes naciones, orientadas a enfrentar el problema de manera mancomunada.

## **2. Los años de posguerra, la creación y consolidación de la Carta Internacional de derechos humanos**

Los años posteriores a la segunda guerra mundial, fueron el escenario propicio para poder llegar a un acuerdo internacional sobre cuáles son los derechos que se reconocen a toda persona en tanto ser humano.

2.1. En abril de 1948, en Bogotá, se adoptó la Declaración Americana de Derechos y Deberes del Hombre (DADH, 1948), primera Declaración internacional de este tipo. La Declaración contiene prácticamente todos los derechos reconocidos en los Pactos Internacionales de derechos civiles y políticos y de derechos económicos, sociales y culturales, pero además, los consagra conjunta e integralmente, no los separa en dos grupos distintos. El artículo 11 de la Declaración consagra a toda persona el derecho, ‘a que su salud sea preservada (1) ‘por medidas sanitarias y sociales, relativas a la alimentación, el vestido, la vivienda y la asistencia médica’, (2) ‘correspondientes al nivel que permitan los recursos públicos y los de la comunidad’. Esta forma de consagrar el derecho a la salud es significativa, entre otras razones, por dos aspectos. El primero de ellos es que no reduce el derecho a la salud a la dimensión médica. Los servicios de salud médicos son sin duda ámbitos centrales de protección del derecho, pero no los únicos. Las medidas sanitarias y medidas relativas a la alimentación que se requieran para proteger y garantizar la salud, por ejemplo, también se encuentran incluidas dentro del ámbito de protección. El segundo aspecto a resaltar, es que la DADH establece una relación entre el derecho a la salud y los recursos con los que cuenta un país. Por supuesto, la Declaración reconoce que un Estado no puede tener el deber de cumplir con una prestación que, materialmente, le sea imposible de cumplir. No obstante, cuáles son concretamente los servicios de salud que un país tiene el deber de asegurar a las personas es una cuestión que depende de un criterio objetivo, no de la mera voluntad política de los estados. En este caso, las ‘medidas sanitarias y sociales’ que se adopten para preservar la salud de toda persona deben ser las ‘*correspondientes*’ al nivel ‘*que permitan los recursos públicos y los de la comunidad*’. El nivel de protección a la salud no es el que se quiera o se acuerde, sino el que permitan los recursos

con que se cuente, teniendo en cuenta para el efecto, no solo los dineros que hacen parte del erario público, sino la riqueza de la sociedad a la cual la persona pertenece.

2.2. En diciembre de 1948, la Asamblea General de Naciones Unidas adoptó y proclamó la Declaración Universal de Derechos Humanos (DUDH, 1948), reiterando que los pueblos han reafirmado “(...) su fe en los derechos fundamentales del hombre, en la dignidad y el valor de la persona humana y en la igualdad de derechos de hombres y mujeres; y se han declarado resueltos a promover el progreso social y a elevar el nivel de vida dentro de un concepto más amplio de la libertad”. Han reafirmado su fe de construir un mundo que garantice a toda persona sus derechos, por haber sido liberadas del ‘*temor y la miseria*’. La Declaración consagra varios derechos de carácter económico, social y cultural, entre ellos, específicamente, el derecho de toda persona ‘*a un nivel de vida adecuado que le asegure*’ a ella y a su familia ‘*la salud y el bienestar*’; la maternidad y a la infancia se protegen especialmente. En este caso, al igual que en la DADH, la asistencia médica es tan sólo un ámbito de protección del derecho a la salud, al que se suman, por ejemplo, el vestido y la alimentación (art. 25, DUDH).

Uno de los aspectos que se tuvo en cuenta para proponer una carta de derechos internacional que incluyera derechos civiles y políticos, pero también derechos económicos, sociales y culturales, era que varias constituciones nacionales ya los habían reconocido. De hecho, los acontecimientos económicos, así como las teorías que a partir de estos se desarrollaron, propiciaron un amplio consenso en la comunidad internacional en torno al reconocimiento de los derechos económicos y sociales. Incluso los Estado Unidos de América, país que más se había opuesto a consagrar una protección amplia de estos derechos, lo hacía por la interferencia que suponía con los debates de política y economía interna de cada nación, no por estar en desacuerdo con este tipo de derechos en sí. De hecho, ante la evidencia de que la miseria afecta la libertad, pues las crisis habían mostrado que ‘las personas necesitadas no son personas libres’ y que por tanto, era propicio reconocer derechos económicos y sociales.

2.3. Los Convenios de Ginebra de 1949, se ocupan de consagrar y proteger, a nivel internacional, el derecho a la salud en el contexto de los conflictos armados. Desde estos instrumentos primeros instrumentos internacionales de protección de derechos humanos, bajo circunstancias de guerra, esto es, bajo circunstancias extremas, el derecho a la salud es contemplado y consagrado expresa y claramente, dándole carácter de irrenunciables a algunos de sus ámbitos de protección; se contemplan además derechos específicos derivados del derecho a la salud que son ‘irrenunciables’

Así, el Convenio de Ginebra para aliviar la suerte que corren los heridos y los enfermos de las fuerzas armadas en campaña (Convenio I, 1949) establece que en caso de ‘conflicto armado que no sea de índole internacional y que surja en el territorio de una de las Altas Partes Contratantes’, cada una de las Partes en conflicto tiene obligaciones para con la salud de los heridos y

enfermos, tanto con la de quienes participan en las hostilidades, como con la de aquellos que no. El Convenio indica expresamente que se trata de derechos irrenunciables, pues *‘los heridos y los enfermos, así como los miembros del personal sanitario y religioso, no podrán, en ninguna circunstancia, renunciar parcial o totalmente a los derechos que se les otorga en el (...) Convenio’*, advirtiendo además que las obligaciones que de este se derivan no sólo son de ‘respeto’ al derecho a la salud, sino también de ‘protección’ del mismo. Como medida adicional de protección a la salud de las personas objeto del Convenio se prohíbe atacar *‘establecimientos fijos y las unidades sanitarias móviles del Servicio de Sanidad’*.

El Convenio de Ginebra relativo al trato debido a los prisioneros de guerra (Convenio III, 1949) establece la protección de la salud a todo prisionero de esta clase, estableciendo dimensiones que suponen una actuación primordialmente positiva por parte del Estado (asegurar asistencia médica necesaria), propias de obligaciones de protección, así como dimensiones negativas, que suponen ante todo omisiones por parte del Estado (no fijar reglamentos que impongan trabajos o sanciones perjudiciales para la salud), propias de obligaciones de respeto.

En el mismo sentido, el Convenio de Ginebra relativo a la protección debida a las personas civiles en tiempo de guerra (Convenio IV, 1949) establece que los extranjeros en el territorio de una parte en conflicto (personas protegidas) tienen derecho a recibir, *‘si su estado de salud lo requiere, tratamiento médico y asistencia hospitalaria en las mismas condiciones que los súbditos del Estado interesado’*. También se contempla este derecho para las personas protegidas inculpadas. El Convenio dedica disposiciones específicas a la higiene y asistencia médica y fija dimensiones negativas del derecho, como por ejemplo, que la *‘disciplina en los lugares de internamiento debe ser compatible con los principios de humanidad y no implicará, en ningún caso, reglamentos que impongan a los internados trabajos físicos peligrosos para su salud o medidas vejatorias de índole física o moral’*. Además, los Estados partes se comprometen tomar *‘todas las oportunas medidas legislativas para determinar las adecuadas sanciones penales que se han de aplicar a las personas que hayan cometido, o dado orden de cometer, una cualquiera de las infracciones graves’*, incluyendo dentro de ellas *‘el hecho de causar deliberadamente grandes sufrimientos o de atentar gravemente contra la integridad física o la salud’*.

2.4. En la Declaración de los Derechos del Niño (1959), teniendo en cuenta, entre otros aspectos, que los niños y las niñas “por su falta de madurez física y mental” necesitan protección y cuidado especiales, la Asamblea General de Naciones Unidas proclamó diez principios orientados a este fin, entre los cuales se protegen diversos derechos económicos, sociales y culturales. Se reconoce que todo niño tendrá derecho *“a crecer y desarrollarse en buena salud”*, indicando explícitamente que para este fin *“deberán proporcionarse cuidados especiales”*. Se reconoce que todo niño tiene derecho *“a disfrutar servicios médicos adecuados.”*

2.5. Las Reglas mínimas para el tratamiento de los reclusos (1955), además de contemplar ámbitos de protección propios de la salud, íntimamente ligados a otros derechos, como la alimentación, se contemplan servicios de salud específicos a los que debe tener acceso todo recluso. Estos tienen que ver con diversos temas específicos, como garantizar a los reclusos el acceso a un profesional de la salud, con requerimientos específicos respecto a sus conocimientos; establecer lineamientos básicos en cuanto a la configuración administrativa de los servicios de salud penitenciarios; garantizar la posibilidad, cuando fuere necesario, de ser trasladado (salir de la prisión), tener acceso a los instrumentales y medicamentos necesarios, y a ser atendido por personal profesionalmente competente, especialmente un ‘dentista calificado’. También se fijan reglas con el objeto de que se cuente con instalaciones acondicionadas especialmente para los casos de maternidad; se cuente con algunos servicios médicos mínimos que garanticen la salud de cada persona y de la comunidad penitenciaria en general.

2.6. En la Convención Internacional sobre la Eliminación de todas las Formas de Discriminación Racial de Naciones Unidas (1965), se establece que los Estados partes se comprometen “a garantizar el derecho de toda persona a la igualdad ante la ley, sin distinción de raza, color y origen nacional o étnico”, en especial en cuanto a los derechos humanos y las libertades fundamentales. La Convención hace referencia explícita a prohibir y a eliminar la discriminación varios de los derechos económicos, sociales y culturales, en particular, al “*derecho a la salud pública, la asistencia médica, la seguridad social y los servicios sociales*”. La Convención advierte que los Estados partes tomarán medidas “*especiales*” y “*concretas*” para asegurar el adecuado desenvolvimiento y protección de ciertos grupos raciales o de personas pertenecientes a estos grupos, con el fin de garantizar en condiciones de igualdad el pleno disfrute por dichas personas de sus derechos humanos.

2.7. Mediante la Declaración sobre la eliminación de la discriminación contra la mujer (1967), la Asamblea General de las Naciones Unidas reconoció que la “discriminación contra la mujer, por cuanto niega o limita su igualdad de derechos con el hombre, es fundamentalmente injusta y constituye una ofensa a la dignidad humana”. En ella se señala que “*deberán adoptarse todas las medidas apropiadas*” para garantizar a la mujer los mismos derechos que al hombre, en el ámbito económico y social, en particular el derecho a “*medidas que le aseguren contra el desempleo, la enfermedad, la vejez o cualquier otro tipo de incapacidad para el trabajo*”.

2.8. En 1966 se adoptaron los Pactos Internacionales de derechos humanos que desarrollan la Declaración Universal de 1948. Varias razones explican porqué pasó tanto tiempo entre la Declaración y la adopción de textos jurídicos internacionales que desarrollan los derechos que ésta contiene (1966). Entre ellas, las profundas discusiones que se dieron en torno a cómo debían ser concebidas dichas normas, en las deliberaciones previas a su adopción.

2.8.1. Las diferentes posiciones coincidieron en que todos los derechos reconocidos en la *Declaración Universal* tienen carácter jurídico, y en tal sentido, deben ser reconocidos y protegidos. Las discrepancias surgieron en torno a si todos los derechos son fundamentalmente del mismo tipo y, en consecuencia, deben ser regulados de forma similar, o si por el contrario, existen dos categorías distintas, que demandan ser concebidas y desarrolladas por separado. Dos cuestiones prácticas preocupaban en particular en virtud de aquel debate, si los derechos debían ser consagrados en un solo Pacto o en dos diferentes, y si los derechos económicos, sociales y culturales debían ser contemplados de forma general y breve, o de forma detallada y amplia.

Una posición del debate sostenía que debía expedirse un único Pacto para regular todos los derechos, en razón a que todos son de la misma categoría (derechos humanos) y deben ser promovidos y protegidos por igual y al mismo tiempo. Alegaba que sin la vigencia de los derechos económicos, sociales y culturales, los derechos civiles y políticos adquieren un carácter meramente nominal; todos son esenciales y no pueden ser presentados como si existiera una jerarquía entre unos y otros. La otra posición sostenía que ambos grupos de derechos debían ser consagrados en instrumentos internacionales independientes, debido a que existe una diferencia enorme entre ellos que amerita fijar reglas propias para cada caso en estatutos normativos distintos. Según esta segunda posición, los derechos civiles y políticos son justiciables de forma absoluta, pues son de carácter negativo; su cumplimiento no depende de la acción del estado sino de su inacción, constituyen un escudo de defensa para los individuos frente a interferencias ilegítimas del estado. En cambio, para esta posición los derechos económicos, sociales y culturales no son justiciables de forma absoluta, pues no son de aplicación inmediata, son derechos que deben ser implementados de manera progresiva, mediante programas. Esta posición llevaba a abogar también por que este segundo tipo de derechos fuera consagrado de forma general y amplia y no específica como los civiles y políticos. No hacerlo de esta manera, implicaría restringir la libertad de cada país para desarrollar y configurar, de acuerdo a sus capacidades y posibilidades específicas, precisar los ámbitos de protección que se van a garantizar y los programas mediante los cuales se alcanzarán tales propósitos. La controversia finalmente se inclinó a favor de la segunda posición. Se resolvió desarrollar los derechos de la *Declaración Universal* mediante dos Pactos distintos y no en uno sólo, teniendo en cuenta que la implementación de dichos Pactos difiere, dependiendo del conjunto de derechos que contemple. Mientras que para los derechos civiles y políticos se deben desarrollar mecanismos para constatar y corregir las violaciones que se causen a los mismos, en el caso de los derechos económicos, sociales y culturales se deben crear procedimientos para hacer seguimiento constante al desarrollo de los programas que tienen por objeto garantizar su goce efectivo.

2.8.2. El Pacto Internacional de Derechos Económicos, Sociales y Culturales (PIDESC) se acordó en 1966 y entró en vigencia en enero de 1976. El Pacto Internacional de Derechos Civiles y Políticos (PIDCP) también se acordó en

1966 y entró en vigencia en marzo de 1976.

2.8.3. En los dos Pactos se reconoce el derecho de libre determinación de los pueblos, específicamente el derecho a '*disponer libremente de sus riquezas*', '*para el logro de sus fines*', advirtiendo que, '*en ningún caso podrá privarse a un pueblo de sus propios medios de subsistencia*'. Las principales diferencias que existen entre los derechos consagrados en ambos Pactos se refieren pues, al tipo de obligaciones adquiridas en uno y otro caso, y a su justiciabilidad, respectivamente.

2.8.4. En el caso del PIDCP cada uno de los Estados Partes se obliga a –‘se compromete a’– (i) *respetar*’ y (ii) *garantizar*’, (iii) ‘a todos los individuos que se encuentren en su territorio y estén sujetos a su jurisdicción’, (iv) los derechos reconocidos en el Pacto, sin distinción alguna. Se establece que para lograr el objetivo propuesto [cumplir la obligación de ‘respetar’ y ‘garantizar’], se deben adoptar ‘las medidas oportunas para dictar las disposiciones legislativas o de otro carácter que fueren necesarias para hacer efectivos los derechos reconocidos en el presente Pacto y que no estuviesen ya garantizados por disposiciones legislativas o de otro carácter.’ Consecuente con la concepción defendida en los debates previos a la adopción de los pactos, según la cual los derechos civiles y políticos son ‘derechos legales’, se establece un compromiso en cabeza de los Estados para hacer plenamente justiciables los derechos. En tal sentido, los Estados tienen la obligación de garantizar que toda persona cuyos derechos o libertades reconocidos en el Pacto hayan sido violados ‘podrá interponer un recurso efectivo’ ante ‘la autoridad competente, judicial, administrativa o legislativa, o cualquiera otra’ prevista por el sistema legal del Estado, la cual deberá decidir sobre los derechos de quien interponga el recurso. Adicionalmente, establece que las ‘autoridades competentes cumplirán toda decisión en que se haya estimado procedente el recurso’.

2.8.5. Por su parte, en el caso del PIDESC, cada uno de los Estados Partes se obliga a –‘se compromete a’– (i) *adoptar medidas*’ para lograr ‘la plena efectividad’ de los derechos reconocidos en el Pacto, (ii) *progresivamente*’ y (iii) *sin discriminación*’; estas deberán ser (iii) *especialmente [medidas] económicas y técnicas*’, (iii) *hasta el máximo de los recursos de que disponga*’ y (iv) *por todos los medios apropiados, inclusive en particular la adopción de medidas legislativas*’. Así pues, de acuerdo con el carácter de ‘derechos programáticos’ con que fueron concebidos los derechos económicos, sociales y culturales en los debates preparatorios a la adopción del Pacto, se consagraron con dos aspectos característicos. El primero es que el ámbito de protección que deberá efectivamente ser protegido, es decir, los derechos y deberes específicos de las personas y los estados, respectivamente, no están previamente establecidos de forma precisa, sino que dependen del nivel de recursos ‘de que se disponga’. El segundo aspecto es que la justiciabilidad de estos derechos no es plena, pues buena parte de las medidas que se deben adoptar para lograr la plena efectividad de los derechos del PIDESC son de carácter progresivo, esto es, dependen de la implementación

de programas y políticas públicas que busquen lograr este objetivo.

2.8.6. Uno de los aspectos más notorios que revelan las diferencias que existen entre ambos Pactos es el lenguaje empleado para consagrar los derechos en uno y otro. Mientras el PIDCP usa expresiones tales como *‘toda persona tendrá derecho a’* o *‘todo individuo tiene derecho a’*, el PIDESC usa expresiones tales como *‘los Estados Partes en el presente Pacto reconocen el derecho de toda persona a’* o *‘los Estados Partes en el presente Pacto se comprometen a garantizar’*. La fórmula empleada en el segundo caso acentúa la decisión de delegar la tarea de definir el contenido concreto de los derechos económicos, sociales y culturales a los Estados, para que sean éstos, en especial a través del legislador, quienes precisen el alcance de estos. De hecho, los Estados únicamente podrán someter los derechos del PIDESC a limitaciones (i) *‘determinadas por ley’*, (ii) *‘sólo en la medida compatible con la naturaleza de esos derechos’* y (iii) *‘con el exclusivo objeto de promover el bienestar general en una sociedad democrática.’*

2.8.7. Ahora bien, el hecho de que los Estados sean los encargados de precisar el contenido de los derechos económicos, sociales y culturales, implica que las decisiones que al respecto se hayan tomado o se vayan a tomar, fijan el ámbito específico de protección del derecho y, en tal medida han de ser respetadas. Por tal razón el PIDESC advierte que no se podrá admitir *‘restricción o menoscabo de ninguno de los derechos humanos fundamentales reconocidos o vigentes en un país en virtud de (i) leyes, (ii) convenciones, (iii) reglamentos o (iv) costumbres, a pretexto de que el presente Pacto no los reconoce o los reconoce en menor grado’*. Esta regla permite identificar algunas de las fuentes de derecho que determinan en los sistemas jurídicos nacionales el contenido específico de un derecho humano fundamental, tanto los contemplados por el Pacto, como los no contemplados en éste. Es decir, el PIDESC establece los mínimos de protección a los derechos, no máximos. Adicionalmente, el PIDESC fija una regla de interpretación de sus propias normas, en pro de la defensa de los derechos reconocidos, al establecer que ninguna disposición podrá ser interpretada en el sentido de reconocer derecho alguno para *‘emprender actividades o realizar actos’* encaminados a *‘la destrucción de cualquiera de los derechos o libertades reconocidos’* o *‘a su limitación en medida mayor que la prevista en [el Pacto]’*.

2.8.8. No obstante las marcadas diferencias que existen entre los dos Pactos, también hay un gran número de relaciones, de las cuales hasta el momento solo se han mencionado algunas. Una de las principales conexiones que existe entre las dos categorías de derechos, los económicos, sociales y culturales y los civiles y políticos, es la *‘interdependencia’* que existe entre unos y otros. Se trata de la tradición presente en el contexto latinoamericano y en el contexto internacional, según la cual las dos categorías de derechos no pueden ser separados ni lógicamente, ni prácticamente. ¿Para qué sirve el derecho a la libre expresión cuando se tiene hambre y se es iletrado? Así, el PIDESC contempla el derecho de los sindicatos *‘a formar federaciones o confederaciones nacionales y el de éstas a fundar organizaciones sindicales internacionales o*

a afiliarse a las mismas’, el cual está estrechamente vinculado con el derecho, y el PIDCP contempla la libertad de asociación. Similar situación ocurre, como ya se mencionó, con relación al derecho a la vida y el derecho a la salud, que tienen ámbitos de protección conexos.

2.8.9. El PIDESC no establece una clara división entre los derechos económicos, sociales y culturales. Y aunque parte de la doctrina que desarrolla el ejercicio de clasificar los diferentes derechos consagrados en el Pacto en alguna de las categorías, no existe acuerdo respecto a cuáles van en cuáles. De hecho, hay quienes simplemente ignoran la clasificación; en todo caso, el derecho a la salud suele ser clasificado como ‘derecho social’.

2.8.10. El PIDESC establece en su artículo 12 el derecho a la salud, como el derecho ‘*al disfrute de más alto nivel posible de salud física y mental*’. El Pacto consagra que la obligación de adoptar medidas para asegurar la plena efectividad, incluye entre otras las ‘*necesarias*’ para ‘(i) la reducción de la mortalidad y de la mortalidad infantil, y el sano desarrollo de los niños; (ii) el mejoramiento en todos sus aspectos de la higiene del trabajo y del medio ambiente; (iii) la prevención y el tratamiento de las enfermedades epidémicas, endémicas, profesionales y de otra índole, y la lucha contra ellas; y para (iv) la creación de condiciones que aseguren a todos asistencia médica y servicios médicos en caso de enfermedad’.

2.8.11. Pero el derecho a la salud no solo se limita a lo que se contempla en el artículo 12 del PIDESC. Otras normas que se ocupan de consagrar otros derechos económicos sociales y culturales contemplan ámbitos de protección conexos al derecho a la salud. Por ejemplo, el derecho al trabajo contempla el derecho de todo trabajador a laborar en condiciones satisfactorias que le aseguren, especialmente, la seguridad y la higiene, o el derecho de protección a los menores a ser empleados ‘en trabajos nocivos para su moral y salud’. En este sentido, el Pacto también reconoce ‘el derecho de toda persona a un nivel de vida adecuado para sí y su familia, incluso alimentación, vestido y vivienda adecuados, y a una mejora continua de las condiciones de existencia’.

2.8.12. El PIDCP también contempla algunas disposiciones relacionadas con el derecho a la salud. Por ejemplo, ordena que “*nadie será sometido a torturas ni a penas o tratos crueles, inhumanos o degradantes. En particular, nadie será sometido sin su libre consentimiento a experimentos médicos o científicos.*” (PIDCP, art. 7°) Además, como se indicará más adelante, el Comité de Derechos Humanos ha señalado expresamente que el derecho a la vida no debe ser entendido de forma restrictiva, y que por tanto, ha de entenderse incluido el derecho a que, por ejemplo se adopten medidas positivas que contemplen, por ejemplo, prestaciones específicas en materia de salud.

2.9. Por medio de la *Proclamación de Teherán* (1968), la Conferencia Internacional de Derechos Humanos se pronunció acerca de los progresos logrados en los veinte años de vigencia de la *Declaración Universal* (1948) y

del programa que se debe preparar para el futuro. Reiterando el carácter “*indivisible*” de los derechos humanos y las libertades fundamentales que “*todas las naciones deben aceptar*”, se declara que “*la realización de los derechos civiles y políticos sin el goce de los derechos económicos, sociales y culturales resulta imposible*”, por eso, se afirma que la “*consecución de un progreso duradero en la aplicación de los derechos humanos depende de unas buenas y eficaces políticas nacionales e internacionales de desarrollo económico y social*” (acento fuera del texto). La *Proclamación* reconoce que se requieren recursos humanos y materiales para “*promover los derechos humanos y las libertades fundamentales*”. Además, hace referencia, explícita, a qué rubros de los presupuestos estatales serán liberados –el desarme– y el “*deber*” de utilizar tales recursos para promover los derechos y libertades. Con base en las diecinueve declaraciones, la Conferencia Internacional de Derechos Humanos, afirmando su fe en la Declaración Universal y en los demás instrumentos internacionales sobre la materia, exhortó a todos los pueblos y los gobiernos del mundo a dedicarse a promoverlos y a “*redoblar sus esfuerzos*” para ofrecer a todo ser humano “*una vida libre y digna*” que le permita alcanzar “*un estado de bienestar físico, mental, social y espiritual*”.

2.10. En la década de los años sesenta, la región europea da un paso importante en la defensa del derecho a la salud. En 1961 se adoptó *La Carta Social Europea* (CSE, Turín, 1961), la cual establece que toda persona ‘*tiene derecho a beneficiarse de cuantas medidas le permitan gozar del mejor estado de salud que pueda alcanzar*’. Expresamente consagra el derecho ‘*a la protección de la salud*’, en virtud del cual los Estados adquieren el compromiso de ‘*adoptar medidas adecuadas*’ para garantizar el ‘*ejercicio efectivo*’ del derecho. Concretamente, las medidas deben tener por fin ‘*eliminar, en lo posible, las causas de una salud deficiente*’, ‘*prevenir, en lo posible, epidémicas, endémicas y otras*’ y establecer servicios educativos y de consulta para mejorar la salud y estimular un sentido de responsabilidad individual frente a ella’. Además, impide someter a los niños y los adolescentes a trabajos que ‘*pongan en riesgo su salud*’. La CSE (1961) establece que los derechos y principios contemplados en ella, ‘*una vez llevados a la práctica (...) no podrán ser objeto de restricciones o limitaciones*’ no especificadas en la propia Carta, salvo las establecidas (1) por la Ley y que sean (2) ‘*necesarias*’ en (3) ‘*una sociedad democrática*’ (4) con el fin de ‘*garantizar el respeto de los derechos y libertades de terceros o para proteger el orden público, la seguridad nacional, la salud pública o las buenas costumbres*’. Se advierte, en todo caso que las restricciones permitidas por la Carta ‘*no podrán ser aplicadas con una finalidad distinta de aquella para la que han sido previstas*’.

### **3. La entrada en vigor de los Pactos Internacionales de derechos Humanos y desarrollo de los instrumentos de protección de derechos, regionales e internacionales para sujetos de protección especial**

Luego de establecida la carta internacional de derechos en una Declaración y dos Pactos distintos, de tal forma que se acentuaran las diferencias entre los

grupos de derechos consagrados en uno y otro pacto, los órganos encargados de producir el derecho internacional, se interesaron, entre otras cosas, en resaltar la indivisibilidad e interdependencia de los derechos humanos. En tal sentido, se expidieron algunos instrumentos que reconocían los derechos de sujetos de especial protección en distintos ámbitos, entre ellos, la salud. En estos años entraron en vigor varios instrumentos internacionales; la Convención para la Eliminación de las Formas de Discriminación Racial (1965) en 1969; los Pactos de Derechos, el PIDESC (1966) y el PIDCP (1966) entraron en vigor en 1976, el primero en enero, el segundo en marzo.

### *3.1. Desarrollo del derecho a la salud en el ámbito internacional, durante los años setenta y los años ochentas*

3.1.1. En la *Declaración sobre el Progreso y el Desarrollo en lo Social* (1969), se establece que el progreso social y el desarrollo en lo social (1) encuentran fundamento en el respeto de la dignidad y el valor de la persona humana y (2) tienen como finalidad la promoción de los derechos humanos y la justicia social; para lo cual se requiere eliminar inmediatamente toda forma de desigualdad o de explotación y reconocer, sin discriminación alguna, los derechos civiles y políticos, y los económicos, sociales y culturales. La declaración señala que el progreso y el desarrollo social ‘debe encaminarse a la continua elevación del nivel de vida tanto material como espiritual de todos los miembros de la sociedad’, estableciendo como objetivo principal, entre otros, ‘*el logro de los más altos niveles de salud y la prestación de servicios de protección sanitaria para toda la población, de ser posible en forma gratuita*’.

3.1.1.1. La Declaración establece que el logro de los objetivos del progreso y el desarrollo en lo social ‘exige la movilización de los recursos necesarios mediante la acción nacional e internacional’, en especial, demanda que se preste atención a varios medios y métodos contemplados en la propia Declaración. El principal medio consiste en (1) planificar el progreso y el desarrollo en lo social, para lo cual, entre otras cosas, se deben (2) instaurar sistemas nacionales de elaboración y ejecución de políticas y programas sociales, así como (3) promover la investigación social pura y aplicada para la planificación y ejecución de las respectivas políticas y (4) adoptar las medidas adecuadas para que ‘todos los elementos de la sociedad’ participen en la elaboración y ejecución de los planes y programas de desarrollo económico y social. La Declaración demanda (5) movilizar ‘el máximo de los recursos nacionales’, utilizados ‘racional y eficientemente’, e (6) incrementar progresivamente los recursos presupuestarios y de otra índole, necesarios para financiar los aspectos sociales del desarrollo. El logro de los objetivos del progreso y desarrollo en lo social exige igualmente la aplicación de medios y métodos como (7) adoptar medidas pertinentes, ‘legislativas, administrativas o de otra índole, que garanticen a todos no sólo los derechos políticos y civiles, sino también la plena realización de los derechos económicos, sociales

y culturales sin discriminación alguna' y (8) promover reformas sociales e institucionales de bases democráticas.

3.1.1.2. Con relación al derecho a la salud, en general, la Declaración señala que se deben (9) adoptar medidas para (i) 'proporcionar gratuitamente servicios sanitarios a toda la población', y (ii) asegurar 'instalaciones y servicios preventivos y curativos adecuados y servicios médicos de bienestar social' accesibles a todos. Con relación a la salud de las personas mental o físicamente impedidas, señala que se deben (10) adoptar medidas apropiadas para su rehabilitación, en especial si se trata de niños y jóvenes, entre las cuales se encuentra expresamente 'la provisión de tratamiento y prótesis y otros aparatos técnicos'.

3.1.2. Mediante la *Convención sobre la eliminación de todas las formas de discriminación contra la mujer*, CEDAW, (1979) los Estados partes se comprometen a eliminar toda distinción, exclusión o restricción basada en el sexo, que tenga por objeto menoscabar o anular el reconocimiento, goce o ejercicio por la mujer, de los derechos humanos y las libertades fundamentales. Para lograrlo, tomarán en todas las esferas, y en particular en las esferas política, social, económica y cultural, "*todas las medidas apropiadas, incluso de carácter legislativo*". Concretamente, los Estados se comprometen a adoptar todas las medidas apropiadas para eliminar la discriminación de la mujer en la esfera médica, y así asegurarle el "*acceso*", en condiciones de igualdad, "*a los servicios de atención médica*", específicamente, a los servicios relacionados con (i) la planificación familiar, (ii) el embarazo, (iii) el parto y (iv) la nutrición durante el embarazo. Explícitamente se comprometen a proporcionar "*servicios gratuitos cuando fuere necesario*". Adicionalmente, mediante la Convención, los Estados se comprometen a tener en cuenta los "*problemas especiales*" que enfrenta la mujer rural, a quien se le reconoce el importante papel que desempeña en la supervivencia económica de su familia; en particular se comprometen a reconocerles el derecho a "*tener acceso a servicios adecuados de atención médica, inclusive (i) información, (ii) asesoramiento y (iii) servicios en materia de planificación de la familia*".

3.1.3. *Observación General sobre derecho a la vida, contemplando el derecho a la salud* (1982). En 1982, el Comité de derechos Humanos de la ONU adoptó la *Observación General* N° 6, relativa al derecho a la vida (PIDCP, artículo 6°). En esta oportunidad el Comité hizo manifiesta la interdependencia entre el derecho a la vida y el derecho a la salud. El Comité señaló que la "(...) expresión 'el derecho a la vida es inherente a la persona humana' no puede entenderse de manera restrictiva y la protección de este derecho exige que los Estados adopten medidas positivas. A este respecto, el Comité considera que sería oportuno que los Estados Partes tomarán todas las medidas posibles para disminuir la mortalidad infantil y aumentar la esperanza de vida, en especial adoptando medidas para eliminar la malnutrición y las epidemias". Así pues, se defiende que el reconocimiento del derecho a la vida en los sistemas de protección de derechos humanos internacional,

interamericano, europeo y africano es razón suficiente para también entender incluido en dichos sistemas la protección al derecho a la salud, por lo menos parcialmente.

3.1.4. Los *Principios de ética médica aplicables a la función del personal de salud, especialmente los médicos, en la protección de personas presas y detenidas contra la tortura y otros tratos o penas crueles, inhumanos o degradantes* (1982), consagra parámetros importantes con relación al derecho a la salud. En primer lugar se establece que las personas encargadas de prestar servicios de salud a las personas presas o detenidas tienen el deber de ‘brindar protección a la salud física y mental’ y tratar las enfermedades ‘*al mismo nivel de calidad que brindan a las personas que no están presas o detenidas*’. Se fija el límite que existe en la relación profesional entre el personal de salud y las personas detenidas o presas, al señalar que constituye una ‘*violación de la ética médica*’, en particular de los médicos, ‘*cualquier relación cuya sola finalidad no sea evaluar, proteger o mejorar la salud física y mental de éstos*’. No obstante existir esta prohibición general, se establecen casos específicos en los que está vedada cualquier tipo de participación del personal de la salud. Los propios principios contemplan que ‘*no podrá admitirse suspensión alguna de los principios precedentes por ningún concepto, ni siquiera en caso de emergencia pública*.’ Seis años después, en el *Conjunto de Principios para la protección de todas las personas sometidas a cualquier forma de detención o prisión* (1988), se reitera que ‘ninguna persona detenida o presa será sometida, ni siquiera con su consentimiento, a experimentos médicos o científicos que puedan ser perjudiciales para su salud’.

3.1.5. La *Convención sobre los Derechos del Niño* (1989), recordando que en la *Declaración Universal* se proclamó que la infancia tiene derecho a cuidados y asistencia especiales, señala que los Estados Partes reconocen a todo niño el derecho “*intrínseco a la vida*” y garantizarán, en la máxima medida posible, “*la supervivencia*” y “*el desarrollo*” del niño. En la Convención, los Estados partes reconocen el derecho del niño (i) “*al disfrute del más alto nivel posible de salud*” y a (ii) “*servicios para el tratamiento de las enfermedades y la rehabilitación de la salud*”, indicando que “*se esforzarán por asegurar que ningún niño sea privado de su derecho al disfrute de esos servicios sanitarios*”. La Convención establece un estándar alto de cumplimiento al indicar que los Estado Partes asegurarán “*la plena aplicación de este derecho*”, en particular se debe “*adoptar las medidas apropiadas*” para (1) “*reducir la mortalidad infantil y en la niñez*”; (2) “*asegurar la prestación de la asistencia médica y la atención sanitaria que sean necesarias a todos los niños, haciendo hincapié en el desarrollo de la atención primaria de salud*”; (3) “*combatir las enfermedades y la malnutrición en el marco de la atención primaria de la salud mediante, entre otras cosas, la aplicación de la tecnología disponible y el suministro de alimentos nutritivos adecuados y agua potable salubre, teniendo en cuenta los peligros y riesgos de contaminación del medio ambiente*”; (4) “*asegurar atención sanitaria prenatal y postnatal apropiada a las madres*”; (5) “*asegurar que todos los sectores de la sociedad, y en particular los padres y los niños, conozcan los principios básicos de la salud y la nutrición de los niños, las ventajas de la lactancia materna, la higiene y el*

saneamiento ambiental y las medidas de prevención de accidentes, tengan acceso a la educación pertinente y reciban apoyo en la aplicación de esos conocimientos”; y (6) “desarrollar la atención sanitaria preventiva, la orientación a los padres y la educación y servicios en materia de planificación de la familia”.

### 3.2. *Desarrollo del derecho a la salud en el ámbito regional, durante los años setenta y los años ochentas*

El Sistema interamericano se originó en cuatro documentos, la Carta de la OEA (1948), la Declaración Americana de Derechos y Deberes del Hombre (1948), la Carta Internacional Americana de Garantías Sociales (1947), y la Convención Americana sobre Derechos Humanos (1969).

3.2.1. La *Convención Americana sobre Derechos Humanos (CADH, 1969, San José, Costa Rica – Pacto de San José)* se adopta, entre otras razones, considerando las declaraciones internacionales previas de derechos humanos y que éstos merecen protección internacional por cuanto se fundan en los atributos de la persona humana y no en el mero reconocimiento que de ellos hagan los respectivos Estados partes a sus nacionales. El *Pacto de San José* retoma la Declaración Universal de 1948, en especial, para reiterar que “(...) sólo puede realizarse el ideal del ser humano libre, exento del temor y de la miseria, si se crean condiciones que permitan a cada persona gozar de sus derechos económicos, sociales y culturales, tanto como de sus derechos civiles y políticos (...)”. Los Estados partes del *Pacto de San José* tienen la obligación ‘*de respetar*’ los derechos humanos y ‘*garantizar su libre y pleno ejercicio*’, para lo cual, tienen el deber de ‘*adoptar disposiciones de derecho interno*’.

3.2.1.1. Con relación a los derechos económicos, sociales y culturales, surge el ‘*compromiso*’ específico de adoptar ‘*providencias*’, nacionales e internacionales ‘*para lograr progresivamente [su] plena efectividad*’. El *Pacto de San José* (CADH, 1969) establece que la ‘*salud*’ es un límite a varios de los derechos civiles y políticos reconocidos en el *Pacto*.

3.2.1.2. En condiciones de grave amenaza para uno de los Estados partes, éste puede *suspender* algunas de las obligaciones que surgen de la convención, en la medida y tiempo estrictamente limitados a las exigencias de la situación, siempre y cuando dicha suspensión no contraría otras obligaciones internacionales o entrañen discriminaciones. En todo caso hay derechos que por decisión expresa del propio *Pacto de San José* no pueden ser suspendidos. Por otra parte, un Estado solo puede establecer restricciones al goce y al ejercicio de los derechos contemplados por la Convención, cuando éstas sean (i) conforme a las ‘*leyes*’ dictadas por el Congreso de la República, (ii) por razones de interés general y (iii) con el propósito para el cual han sido establecidas (CADH, 1969; art, 29).

3.2.1.3. El *Pacto de San José* no precisa ni define el alcance de los derechos

reconocidos de manera exhaustiva, deja un amplio espacio a cada uno de los Estados para que interprete la Convención y desarrolle sus normas. No obstante, el texto de la Convención impide que se hagan lecturas perversas de la misma al prohibir expresamente que las normas sean interpretadas para (a) suprimir el goce y ejercicio de los derechos en mayor medida a la permitida, (b) limitar el goce y ejercicio de otros derechos reconocidos nacionalmente o en otras convenciones, (c) excluir otros derechos propios de una forma ‘democrática representativa de gobierno, y (d) excluir o limitar el efecto de la Declaración Americana de los Derechos Humanos o documentos internacionales de similar naturaleza.

3.2.1.4. El *Pacto de San José* (1969) entró en vigencia en julio de 1978. El *Protocolo de San Salvador* (1988) también se acuerda en esta época (en la década de los años ochenta), pero entró en vigor hasta la década de los años noventa, en 1999.

3.2.2. El *Protocolo Adicional a la Convención Americana sobre Derechos Humanos en materia de Derechos Económicos, Sociales y Culturales, “Protocolo de San Salvador”* de 1988, avanzó normativamente en la protección de esta clase de derechos ‘*esenciales*’ de todo ser humano, entre ellos el de la salud, en el contexto latinoamericano. El Protocolo fue adoptado, entre otras razones, partiendo de la “estrecha relación que existe entre la vigencia de los derechos económicos, sociales y culturales y la de los derechos civiles y políticos” y teniendo en cuenta que la necesidad de ‘reafirmar, desarrollar, perfeccionar y proteger’ los derechos económicos, sociales y culturales para consolidar el régimen democrático en América y “*el derecho de sus pueblos al desarrollo, a la libre determinación y a disponer libremente de sus riquezas y recursos naturales*”. El Protocolo responde a los avances doctrinarios de la época acerca de los derechos económicos, sociales y culturales, debido a la preocupación que existía sobre el tema, a los documentos internacionales, a los documentos regionales, a las constituciones nacionales de los Estados partes y a criterios de otros organismos internacionales.

3.2.2.1. Mediante el *Protocolo de San Salvador* los Estados americanos decidieron comprometerse a cumplir cinco tipos de obligaciones con relación a los derechos económicos sociales y culturales, contempladas en los primeros 5 artículos, a saber, (i) ‘*adoptar medidas*’ necesarias, hasta el máximo de los recursos disponibles, para lograr progresivamente su plena efectividad; (ii) ‘*adoptar disposiciones*’ legislativas o de otro carácter que fueren necesarias para hacer[los] efectivos; (iii) garantizar su ejercicio *sin discriminación*; (iv) ‘*no restringir*’ derechos específicamente reconocidos nacional o internacionalmente y (v) sólo restringir y limitar los derechos reconocidos en el Protocolo mediante leyes que tengan por fin proteger el bienestar general en una ‘*sociedad democrática*’. Los siguientes 11 artículos (6 al 16) establecen los derechos económicos, sociales y culturales objeto de protección. Más adelante (artículo 19), se advierte que los Estados partes tienen el compromiso de presentar informes periódicos con relación a ‘*las medidas progresivas que*

hayan adoptado para asegurar el debido respeto de los derechos' consagrados en el Protocolo. Así pues, uno de los sentidos esenciales del Protocolo fue el de propender por garantizar los derechos económicos, sociales y culturales, reconociendo su carácter progresivo, pero defendiendo su condición de imperativos jurídicos exigibles. En el Informe Anual de la Comisión de Derechos Humanos 1985-1986, en el cual se presentó el proyecto del Protocolo de San Salvador, dijo la Comisión al respecto,

*“(...) Conforme al sistema establecido por el artículo 1º de la Convención, el destinatario de la protección internacional es la persona, entendiendo por tal a todo ser humano. Al respecto la Comisión nuevamente desea insistir que los derechos que habrían de garantizarse por medio del Protocolo Adicional son atributos de la persona humana por su calidad de tal y por los tanto ellos no pueden ser considerados como el resultado aleatorio del éxito de determinadas políticas económicas o sociales. Como derechos humanos que son, los derechos económicos, sociales y culturales son, pues, imperativos exigibles y no metas de desarrollo simplemente deseables.”*

3.2.2.2. El artículo 10 del *Protocolo de San Salvador* se ocupa específicamente del ‘derecho a la salud’ de toda persona, entendiendo ésta como ‘el disfrute del más alto nivel de bienestar físico, mental y social’. En primer término los Estados partes se comprometen a ‘reconocer’ la salud como un ‘bien público’, obligándose específicamente a adoptar medidas para garantizar (a) la ‘atención primaria’ en salud, (b) la extensión del beneficio de los servicios de salud a todas las personas (universalidad), (c) la ‘total inmunización’ contra las enfermedades infecciosas, (d) la ‘prevención’ y ‘tratamiento’ de las enfermedades, en especial las endémicas, (e) la ‘educación sobre prevención y tratamiento’ de problemas de salud y (f) la ‘satisfacción de las necesidades de salud’ de los grupos de ‘más alto riesgo’ y ‘los más vulnerables por su condición de pobreza’.

3.2.2.3. En los artículos que consagran los demás derechos económicos, sociales y culturales, se hace relación a ámbitos de protección que se encuentran en conexidad con el derecho a la salud. Así, por ejemplo, para asegurar el goce del derecho al trabajo, los Estados están obligados a garantizar mediante su legislación ‘la seguridad e higiene en el trabajo’; la prohibición de trabajo en ‘labores insalubres’ o ‘peligrosas’ a los menores de 18 años y, en general, ‘de todo trabajo que pueda poner en peligro su salud’; jornadas de menor duración cuando se trate de trabajos ‘insalubres’. El derecho a la Seguridad Social, cuando se trata de personas que se encuentran trabajando, cubre ‘al menos la atención médica y el subsidio o jubilación’ para accidentes de trabajo y enfermedades profesionales y ‘licencia retribuida por maternidad antes y después del parto’. En sentido similar, se relaciona la salud con el derecho a un medio ambiente sano o a la alimentación.

### 3.3. Conclusión.

En conclusión, en esta segunda etapa, en el plano internacional los Pactos de derechos humanos entraron en vigencia y se adoptaron varias convenciones en las que se protegían los derechos de clases de personas específicas, garantizando especialmente las dimensiones propias del derecho a la salud. En el ámbito interamericano se producen los dos tratados regionales sobre derechos humanos, reconociendo en los términos señalados, el derecho a la salud. Por último, aunque no fue mencionado en este resumen, cabe señalar que este periodo vio nacer un sistema de protección de los derechos humanos en el África, que incluyó de forma clara y decidida, la defensa del derecho a la salud, el cual ha sido considerado explícitamente como un derecho *fundamental*.

#### **4. Los años noventa y comienzo del siglo XXI, desarrollo interpretativo de los textos que consagran la Carta Internacional de Derechos Humanos; la defensa del derecho fundamental a la salud**

En los años 90 y la primera década del siglo XXI, la producción del derecho internacional de derechos humanos se centró en la definición del alcance y sentido de los textos legales existentes, por parte de los órganos respectivos, en especial, por parte del Comité de Derechos Sociales, Económicos y Culturales, y no en la creación de nuevos textos legales. El nuevo instrumento expedido en estos años, en 1990, es la Convención sobre trabajadores migratorios y sus familiares.

4.1. En la *Convención internacional sobre la protección de los derechos de todos los trabajadores migratorios y de sus familiares* (1990), la Asamblea General de las Naciones Unidas reconoció que “los trabajadores migratorios y sus familiares tendrán derecho a recibir cualquier tipo de atención médica urgente que resulte necesaria para preservar su vida o para evitar daños irreparables a su salud en condiciones de igualdad de trato con los nacionales del Estado de que se trate.” La *Convención* señala expresamente que “esa atención médica de urgencia no podrá negarse por motivos de irregularidad en lo que respecta a la permanencia o al empleo”. Además, reitera la estrecha relación que existe entre el derecho a la salud y la dignidad humana.

4.2. El acento sobre la indivisibilidad y la interdependencia de todos los derechos humanos que hace la comunidad internacional en diferentes documentos, como por ejemplo los *Principios para la protección de los enfermos mentales y el mejoramiento de la atención de la salud mental* (1991). En la medida que el criterio de clasificación de las reglas fijadas en esta declaración es la protección de un grupo específico de personas, y no una categoría de derechos, se encuentran consagradas referencias, indistintamente, a ámbitos propios de los derechos civiles y políticos, o de los derechos económicos sociales y culturales. Desde el inicio del documento esto es evidente. El Principio 1 se ocupa de las ‘*libertades fundamentales y derechos básicos*’ de estas personas, enunciando en primer lugar un derecho social que

tienen, el derecho ‘a la mejor atención disponible en materia de salud mental’, y en segundo lugar, un derecho civil, el derecho a ser ‘tratadas con humanidad y con respeto a la dignidad inherente de la persona humana’. Ahora bien, los principios enunciados en este documento internacional no solo regulan conjuntamente ambas clases de derechos (derechos de libertad y derechos sociales), en ocasiones también precisan el ámbito de protección de un tipo a partir de los del otro tipo. En este sentido, el Principio 19, que se ocupa del derecho de ‘acceso a la información’, advierte que éste puede ser limitado cuando se pueda afectar el derecho ‘a la salud’ del propio paciente.

4.3. En la *Declaración y Programa de acción de Viena* (1993) adoptada por la Conferencia Mundial de Derechos Humanos, se estableció que “[t]odos los derechos humanos son universales, indivisibles e interdependientes y están relacionados entre sí. La comunidad internacional debe tratar los derechos humanos en forma global y de manera justa y equitativa, en pie de igualdad y dándoles a todos el mismo peso.” La Declaración reconoce, entre otras cosas, la “importancia del disfrute por la mujer del más alto nivel de salud física y mental durante toda su vida”, concretamente su derecho “a tener acceso a una atención de salud adecuada y a la más amplia gama de servicios de planificación familiar”.

4.4. La *Recomendación general* N° 24 (1999) sobre ‘la mujer y la salud’, fue adoptada por el Comité para la Eliminación de la Discriminación contra la Mujer, “(...) afirmando que el acceso a la atención de la salud, incluida la salud reproductiva, es un derecho básico previsto en la Convención sobre la eliminación de todas las formas de discriminación contra la mujer” [CEDAW, 1979] (acento fuera del texto original). En ella se señala que las medidas estatales encaminadas a garantizar el goce del derecho a la salud deben ser racionales, razonables y diferenciadas al establecer que los informes que presenten los Estados “(...) deben demostrar que la legislación, los planes y las políticas en materia de salud se basan en investigaciones y evaluaciones científicas y éticas del estado y las necesidades de salud de la mujer en el país y tienen en cuenta todas las diferencias de carácter étnico, regional o a nivel de la comunidad, o las prácticas basadas en la religión, la tradición o la cultura.” La *Recomendación* contempla ámbitos de protección del derecho a la salud cuya garantía supone destinar enormes recursos humanos y materiales para el efecto, y ámbitos de protección del derecho que no suponen tal despliegue administrativo, como por ejemplo, el derecho de toda mujer a estar plenamente informada acerca de los procedimientos médicos que requiere, los posibles efectos y las alternativas existentes.

4.5. *Las Observaciones del Comité de Derechos Económicos, Sociales y Culturales* (CESCR) A partir de 1989, el Comité realiza ‘observaciones generales’ acerca del *Pacto Internacional de Derechos Económicos, Sociales y Culturales* (PIDESC, 1966) en desarrollo de su función primordial, vigilar la aplicación del Pacto por los Estados Partes. Para el Comité, el PIDESC reconoce que los estados tienen tres tipos de obligaciones, derivadas de los derechos reconocidos, obligaciones de *respetar*, obligaciones de *proteger* y

obligaciones de *garantizar*.

4.5.1. La Observación General N°1 (1989) se ocupa de la Presentación de los informes por parte de los Estados Partes, precisando que éstos no son un mero requisito formal, sino instrumentos adecuados para el logro de los derechos económicos, sociales y culturales, pues obligan a los Estado a adoptar, efectivamente, algunas de las medidas necesarias para la protección de estos derechos. Entre las medidas cuyo cumplimiento se busca garantizar mediante la presentación de informes, se encuentran las siguientes, (i) “un examen amplio de la legislación, las normas y procedimientos administrativos y las diversas prácticas nacionales en un esfuerzo por ajustarlas en todo lo posible a las disposiciones del Pacto”; (ii) vigilar constantemente “la situación real con respecto a cada uno de los derechos y, por consiguiente, [mantenerse] al corriente de la medida en que todos los individuos que se encuentran en su territorio o bajo su jurisdicción disfrutan, o no disfrutan, de los diversos derechos”; (iii) iniciar la adopción de políticas mediante las cuales se cumpla la obligación de “elaborar y adoptar un plan detallado de acción para la aplicación progresiva” de cada uno de los derechos contenidos en el Pacto; (iv) “facilitar el examen público de las políticas de los gobiernos” con respecto a los DESC y “estimular la participación” de los diversos sectores de la sociedad en la “formulación, aplicación y revisión de las políticas pertinentes”; (v) contar con datos tanto cualitativos como cuantitativos a fin de “evaluar de manera efectiva la medida en que se han hecho progresos hacia el cumplimiento de las obligaciones contenidas en el Pacto”; y (vi) comprender mejor los problemas y limitaciones que se presenten en los esfuerzos por alcanzar progresivamente toda la gama de derechos económicos, sociales y culturales, al determinar las circunstancias y dificultades que inhiben su realización y con el propósito de construir “el marco en el cual podrán elaborarse políticas más apropiadas”.

4.5.2. La Observación General N°3 (1990) sobre ‘*la índole de las obligaciones de los Estados Partes*’, establece que el PIDESC (1966) impone a los Estados Partes ‘obligaciones de comportamiento’ y ‘obligaciones de resultado’. Así, aunque algunas de las obligaciones suponen “una realización paulatina” y tener en cuenta “las restricciones derivadas de la limitación de los recursos con que se cuenta”, el Pacto también impone “varias obligaciones con efecto inmediato”. Por ejemplo, “que los Estados se *comprometen a garantizar* que los derechos pertinentes se ejercerán *sin discriminación*”.

4.5.2.1. Otra obligación de carácter inmediato que resalta la *Observación N°3*, es el compromiso de ‘*adoptar medidas*’, compromiso que en sí mismo no queda condicionado ni limitado por ninguna otra consideración”. La plena realización de los derechos sociales puede lograrse de manera paulatina, pero las medidas que busquen este objetivo deben adoptarse dentro de un plazo “*razonablemente breve*” tras la entrada en vigor del Pacto. La *Observación* establece que las medidas deben ser (i) “deliberadas”, (ii) “concretas” y (iii) “orientadas lo más claramente posible hacia la satisfacción de las obligaciones reconocidas en el Pacto” (PIDESC, 1966).

4.5.2.2. La *Observación N°3* establece que los medios que deben emplearse para dar cumplimiento a la obligación de ‘*adoptar medidas*’ son ‘*todos los medios apropiados, inclusive en particular la adopción de medidas legislativas*’. El Comité reconoce que en numerosos casos las medidas legislativas son muy deseables y en algunos pueden ser incluso indispensables, como por ejemplo, “en esferas como la salud, la protección de los niños y las madres y la educación”. Dentro de las medidas que deben contemplar los Estados, diferentes a las legislativas, se reconoce explícitamente la de “ofrecer recursos judiciales en lo que respecta a derechos que, de acuerdo con el sistema jurídico nacional, puedan considerarse justiciables”. El Comité observa que cada es Estado libre de elegir el modelo económico, social y político que desee para garantizar la plena efectividad de los derechos sociales, recalcando que en tal sentido el PIDESC (1966) es neutral; los derechos reconocidos en éste “pueden hacerse efectivos en el contexto de una amplia variedad de sistemas económicos y políticos, a condición únicamente de que la interdependencia e indivisibilidad de los dos conjuntos de derechos humanos, como se afirma entre otros lugares en el preámbulo del Pacto, se reconozcan y queden reflejados en el sistema de que se trata.”

4.5.2.3. Observa el Comité que la principal obligación que se fija en el PIDESC (1966) es la de adoptar medidas ‘*para lograr progresivamente (...) la plena efectividad de los derechos reconocidos [en el Pacto]*’. Este concepto de ‘*progresiva efectividad*’ es el reconocimiento de que la plena efectividad de todos los derechos económicos, sociales y culturales, en general, no podrá lograrse en un breve período de tiempo. No obstante, el hecho de que la efectividad plena de los derechos se de a lo largo del tiempo, o en otras palabras progresivamente, “no se ha de interpretar equivocadamente como que priva a la obligación de todo contenido significativo.” Como lo ha resaltado la doctrina, la idea de progresividad contempla dos conceptos; el de ‘gradualidad’, el de pasos, pero a la vez el de progreso, el de avance.

4.5.2.4. El Comité reconoce pues, que corresponde a cada Estado “una obligación mínima de asegurar la satisfacción de *por lo menos niveles esenciales de cada uno de los derechos*” y da ejemplos al respecto. Observa, así, que un Estado “en el que un número importante de individuos está privado de alimentos esenciales, *de atención primaria de salud esencial*, de abrigo y vivienda básicos o de las formas más básicas de enseñanza, *prima facie* no está cumpliendo sus obligaciones en virtud del Pacto. Si el Pacto se ha de interpretar de tal manera que no establezca una obligación mínima, carecería en gran medida de su razón de ser.”

4.5.2.5. El PIDESC (1966) impone a los Estados una obligación de proceder lo más expedita y eficazmente posible con miras a lograr la plena efectividad de los derechos que contempla. En tal sentido, observa el Comité, “todas las medidas de carácter deliberadamente retroactivo en este aspecto requerirán (i) *la consideración más cuidadosa y* (ii) *deberán justificarse plenamente por*

referencia a la totalidad de los derechos previstos en el Pacto y en el contexto del aprovechamiento pleno del máximo de los recursos de que se disponga.” En todo caso, en el evento de que se demuestre “que los recursos disponibles son insuficientes”, esto no modifica o altera la obligación estatal de asegurar el disfrute más amplio posible de los derechos sociales, dadas las circunstancias reinantes.

4.5.2.6. La obligación de garantizar mínimos como el acceso a la atención primaria de salud esencial no es la única cuyo incumplimiento difícilmente puede ser justificado por la falta de recursos. Específicamente, el Comité observa que “aun en tiempos de limitaciones graves de recursos causadas sea por el proceso de ajuste, de recesión económica o por otros factores, se puede y se debe en realidad proteger a los miembros vulnerables de la sociedad mediante la adopción de programas de relativo bajo costo.”

4.5.3. Varias de las Observaciones realizadas por el Comité han versado sobre derechos específicos del PIDESC (1966), reconociendo la interdependencia e indivisibilidad de derechos humanos. Así por ejemplo, aspectos del derecho a la salud son precisados a propósito de las obligaciones que se derivan del derecho a una vivienda adecuada, o de los derechos de las personas con discapacidad o de las personas mayores. Con relación al derecho a una vivienda adecuada, el Comité observó [*Observación N°4* (1991)] observa que una vivienda adecuada debe, entre otros aspectos, (i) contener “servicios indispensables para la salud”; (ii) ser habitable, es decir proteger a sus ocupantes de las inclemencias del tiempo “u otras amenazas para la salud”; y (iii) estar en un lugar que permita el acceso a “los servicios de atención de la salud”. Con relación a los derechos de las personas con discapacidad, el Comité observó [*Observación N°5* (1994)] que el ‘derecho al disfrute de salud física y mental’ “(...) implica también el derecho a tener acceso a los servicios médicos y sociales –incluidos los aparatos ortopédicos– y a beneficiarse de dichos servicios, para que las personas con discapacidad puedan ser autónomas, evitar otras discapacidades y promover su integración social [...] De manera análoga, esas personas deben tener a su disposición servicios de rehabilitación a fin de que logren ‘alcanzar y mantener un nivel óptimo de autonomía y movilidad’ [...] Todos los servicios mencionados deben prestarse de forma que las personas de que se trate puedan conservar el pleno respeto de sus derechos y de su dignidad. Con relación a los derechos de las personas mayores, el Comité observó [*Observación N°6* (1995)] “(...) los Estados Partes deben tener en cuenta el contenido de las Recomendaciones Nos. 1 a 17 del Plan de Acción Internacional de Viena sobre el Envejecimiento que se dedican íntegramente a proporcionar orientaciones sobre la política sanitaria dirigida a preservar la salud de estas personas y comprende una visión integradora, desde la prevención y la rehabilitación, hasta la asistencia a los enfermos terminales.” También señala que “[e]s evidente que no puede abordarse la incidencia, cada vez mayor, de las enfermedades crónicas degenerativas y los elevados costos de hospitalización, solamente mediante la medicina curativa. [...] mantener la salud hasta la vejez exige inversiones durante todo el ciclo vital de los ciudadanos, básicamente a través

de la promoción de estilos de vida saludables (alimentación, ejercicio, eliminación del tabaco y del alcohol, etc.). [...]”.

4.5.4. El más amplio desarrollo acerca del derecho a la salud, su alcance y significado, lo ha realizado el Comité de Derechos Económicos, Sociales y Culturales, en la *Observación General N°14* (2000) acerca ‘*el derecho al disfrute del más alto nivel posible de salud*’. El contenido de esta Observación se encuentra referido en el apartado 3.4.2. de las consideraciones y fundamentos de la presente sentencia.

# SENTENCIA T-760 de 2008

## TABLA DE CONTENIDO

### **I. ANTECEDENTES (3)**

### **II. Consideraciones y fundamentos (3)**

#### **1. Competencia (3)**

#### **2. Planteamiento de los problemas jurídicos y resumen de las decisiones (3)**

2.1. Problemas jurídicos concretos. (5)

2.2. Problemas jurídicos generales. (8)

2.3. Estructura de la decisión. (15)

#### **3. El derecho a la salud como derecho fundamental (15)**

3.1. Noción de salud. (16)

3.2. El derecho fundamental a la salud. (17)

3.3. Facetas positivas y negativas derivadas del derecho a la salud; jurisprudencia sobre la protección de los derechos fundamentales, a propósito de las obligaciones de contenido prestacional. (28)

3.4. Caracterización del derecho a la salud en el bloque de constitucionalidad, clases de obligaciones derivadas del derecho a la salud (*respetar, proteger y garantizar*). (36)

3.5. Los límites del derecho a la salud. Ejemplos de limitaciones en el acceso a servicios. (46)

#### **4. El acceso a servicios de salud de calidad y de manera oportuna y eficaz, garantizado por el derecho fundamental a la salud (50)**

4.1. Existencia de un Sistema de Salud que garantice el acceso a los servicios de salud. (50)

4.2. Pertenencia al Sistema y garantía de la prestación de servicios de salud. (57)

4.3. Conocimiento de la información adecuada y necesaria para

acceder a los servicios de salud con libertad y autonomía. (65)

4.4. Derecho a que las entidades responsables garanticen el acceso a los servicios de salud con calidad, eficacia y oportunidad. (68)

4.4.1. *El derecho a acceder a los servicios que se ‘requieran’.* (69)

4.4.2. *El concepto científico del médico tratante es el principal criterio para establecer si se requiere un servicio de salud, pero no es exclusivo.* (70)

4.4.3. *Acceso a los servicios de salud, incluidos y no incluidos dentro de los planes obligatorios.* (73)

4.4.4. *Regla para solucionar conflictos entre el médico tratante y el Comité Técnico Científico.* (84)

4.4.5. *Los pagos, además de ser razonables, no pueden constituir barreras de acceso a los servicios de salud para quienes no tienen la capacidad económica de sufragarlos.* (87)

4.4.5.1. *Los pagos moderadores no pueden constituir barreras al acceso a los servicios de salud.* (87)

4.4.5.2. *La financiación de los servicios de salud no contemplados dentro de los planes obligatorios, en cada caso concreto.* (99)

4.4.5.3. *Determinación de la capacidad económica, en cada caso concreto. El concepto de carga soportable.* (99)

4.4.5.4. *La falta de capacidad económica puede ser temporal o permanente.* (101)

4.4.5.5. *Reglas probatorias para establecer la capacidad económica.* (102)

4.4.5.6. *No se puede dejar de proteger el derecho a la salud por falta de pruebas.* (104)

4.4.5.7. *Las entidades del sector de la salud no pueden obstaculizar el acceso a los servicios de salud, para obtener el pago del servicio.* (105)

4.4.5.8. *No se puede negar el acceso a un servicio de salud, por omitir el pago de algunas cotizaciones, cuando*

*la entidad se allanó a la mora al recibir nuevos pagos.*  
(106)

*4.4.5.9. El deber de solidaridad y de asumir cargas soportables.* (106)

*4.4.6. La prestación de los servicios debe ser oportuna, eficiente y de calidad. El principio de integralidad.* (107)

*4.4.6.1. Las entidades deben garantizar integralmente el acceso a los servicios de salud requeridos.* (108)

*4.4.6.2 El transporte y la estadía como medio para acceder a un servicio.* (110)

*4.4.6.3. Deber de garantizar el acceso a los servicios de salud, libre de trámites y procedimientos administrativos engorrosos e innecesarios.* (111)

*4.4.6.4. El principio de continuidad; el acceso a un servicio de salud debe ser continuo, y no puede ser interrumpido súbitamente.* (112)

*4.5. Acceso a los servicios de salud que requieren los sujetos de especial protección constitucional, como las niñas y los niños.*  
(116)

## **5. Análisis de los casos concretos de acción de tutela que forman parte del presente proceso** (124)

*5.1. El derecho a la salud comprende el derecho a acceder a los servicios de salud que se requieran con necesidad.* (125)

*5.1.1. Expediente T-1281247 (acceso de un menor a un servicio no incluido en el POS –implante coclear).* (126)

*5.1.2. Expediente T-1310408 (acceso a un servicio de salud necesario para preservar la vida o la integridad personal no incluido en el POS, cuando no se tiene la capacidad económica para costearlo –Mamoplastia–).* (128)

*5.1.3. Expediente T-1328235 (acceso a servicios de salud no incluidos en el POS –medicamentos para diabetes–, solicitud ante el Comité Técnico Científico).* (132)

*5.1.4. Expediente T-1335279 (acceso a servicios de salud –exámenes diagnósticos– de persona vinculada al Sistema de salud).* (134)

5.1.5. Expediente T-1337845 (*acceso a servicio de salud no incluido dentro del POSS – resonancia magnética de la columna –*). (136)

5.1.6. Expediente T-1338650 (*medios necesarios para que una persona vinculada acceda a un servicio de salud –trasplante de tráquea– en lugar distinto a su domicilio*). (138)

5.1.7. *Ausencia de reglamentación para autorizar oportuna y prontamente los servicios médicos distintos a medicamentos no excluidos, que se requieran y no estén incluidos en el plan obligatorio de salud aplicable.* (140)

5.2. Los pagos moderadores no pueden ser una barrera que dificulte, postergue o impida el acceso a los servicios de salud que se *requieran*. (141)

5.3. Protección especial del derecho a acceder a los servicios de salud de las niñas y los niños. (145)

5.4. Una entidad encargada de garantizar el derecho a la salud sólo puede desconocer el concepto de un médico reconocido que no está adscrito a su red de prestadores, cuando su posición se funda en razones médicas especializadas sobre el caso en cuestión. (147)

5.5. El derecho de acceder a los servicios incluidos en el plan obligatorio, no puede ser obstaculizado alegándose incumplimiento en ciertos pagos, cuando la entidad se allana a la mora, al recibir nuevos pagos. (152)

5.6. El acceso a los servicios de salud que se *requieran*, está especialmente garantizado a las personas que padecen enfermedades catastróficas o de alto costo. (154)

5.7. La limitación a la libertad de afiliación de las personas que padecen enfermedades catastróficas no debe impedir que la persona pueda acceder a los servicios de salud que *requiere*, con calidad, oportuna e idóneamente. (156)

5.8. Un órgano del Estado viola el derecho de petición cuando no responde con congruencia y de fondo la solicitud de una entidad o institución del sector, en especial si la petición va orientada a garantizar el goce efectivo del derecho a la salud de los afiliados y beneficiarios del sistema de salud. (159)

5.9. Las dudas acerca de lo que se encuentra incluido o no en el POS deben ser interpretadas conforme al principio de integralidad,

mientras no exista un mecanismo institucional para resolverlas.  
(161)

**6. Problemas recurrentes constatados dentro de un patrón de violaciones al derecho a la salud. Órdenes a los órganos de regulación para garantizar el goce efectivo del derecho a la salud (162)**

6.1. Ordenes relacionadas con los planes de beneficios. (166)

6.1.1. *Medidas para eliminar la incertidumbre acerca del contenido de los planes de beneficios y actualización periódica de los mismos.* (167)

6.1.1.1. *Análisis del problema y de la situación actual.*  
(167)

6.1.1.2. *Órdenes específicas a impartir.* (181)

6.1.2. *Unificación del Plan de Beneficios. Unificación inmediata en el caso de niños. Diseño de un programa y cronograma en el caso de adultos.* (184)

6.1.2.1. *Análisis del problema y de la situación actual.*  
(184)

6.1.2.2. *Órdenes específicas a impartir.* (190)

6.1.3 *Ampliación de las competencias del CTC para que también se pronuncie sobre solicitudes de servicios médicos diferentes a medicamentos en cualquiera de los regímenes.*  
(192)

6.1.3.1. *Análisis del problema y de la situación actual.*  
(192)

6.1.3.2. *Ordenes específicas a impartir.* (203)

6.1.4. *Medidas para evitar que se rechace o se demore la prestación de los servicios médicos que sí se encuentran incluidos en el POS.* (204)

6.1.4.1. *Análisis del problema y de la situación actual.*  
(204)

6.1.4.2. *Ordenes específicas a impartir.* (207)

6.2 Ordenes relacionadas con el derecho al recobro de servicios médicos no cubiertos por el plan de beneficios ante el Fosyga o las

entidades territoriales. (208)

6.2.1. *Orden para agilizar la ejecución de las sentencias de tutela.* (221)

6.2.1.1. *Análisis del problema y de la situación actual.* (221)

6.2.1.2. *Ordenes específicas a impartir.* (226)

6.2.2. *Orden relativa a la adopción de un plan de contingencia.* (227)

6.2.2.1. *Análisis del problema y de la situación actual.* (227)

6.2.2.2. *Ordenes específicas a impartir.* (231)

6.2.3. *Orden de corregir las trabas en el sistema de recobros.* (232)

6.2.3.1. *Análisis del problema y de la situación actual.* (232)

6.2.3.2. *Ordenes específicas a impartir.* (234)

6.3. *Órdenes para proteger el derecho a la información en salud; carta de derechos y carta de desempeño.* (235)

6.3.1. *Análisis del problema y de la situación actual.* (235)

6.3.2. *Ordenes específicas a impartir.* (239)

6.4. *Órdenes sobre cobertura universal.* (240)

6.4.1. *Análisis del problema y de la situación actual.* (240)

6.4.2. *Ordenes específicas a impartir.* (247)

**7. Temas relacionados con la protección del derecho a la salud en los cuales no se profieren órdenes atinentes a la regulación** (247)

**8. Resumen de las decisiones adoptadas** (251)

8.1. *Resumen respecto de los casos acumulados.* (252)

8.2. *Resumen de las órdenes con relación a los problemas jurídicos generales.* (259)

**9. La reducción de la presentación de acciones de tutela para acceder a los servicios de salud como indicador del cumplimiento de esta sentencia** (260)

### **III. DECISIÓN Y PARTE RESOLUTIVA** (263)

#### **PRIMER ANEXO**

##### **I. Antecedentes de los expedientes acumulados y de las correspondientes medidas cautelares adoptadas en cada caso** (276)

1. Expediente T-1281247 (*acceso de un menor a un servicio no incluido en el POS –implante coclear–*). (276)

2. Expediente T-1289660 (*acceso a servicio de salud incluido en el POS, sometido a pagos moderadores –coronariografía con cateterismo izquierdo y ventriculografía–*). (284)

3. Expediente T-1308199 (*reconocimiento de incapacidades, cuando los aportes a Salud fueron extemporáneos y a la vez aceptados por la EPS*). (289)

4. Expediente T-1310408 (*acceso a un servicio de salud necesario para preservar la vida o la integridad personal no incluido en el POS, cuando no se tiene la capacidad económica para costearlo –Mamoplastia–*). (292)

5. Expediente T-1315769 (*acceso a servicio de salud incluido en el POS, sometido a pagos moderadores –carga viral–*). (297)

6. Expediente T-1320406 (*acceso de niña vinculada al sistema a un servicio de salud –mamoplastia–*). (299)

7. Expediente T-1328235 (*acceso a servicios de salud no incluidos en el POS –medicamentos para diabetes–, solicitud ante el Comité Técnico Científico*). (300)

8. Expediente T-1335279 (*acceso a servicios de salud –exámenes diagnósticos– de persona vinculada al Sistema de salud*). (303)

9. Expediente T-1337845 (*acceso a servicio de salud no incluido dentro del POSS –resonancia magnética de la columna –*). (304)

10. Expediente T-1338650 (*medios necesarios para que una persona vinculada acceda a un servicio de salud –transplante de tráquea– en*

*lugar distinto a su domicilio).* (307)

11. Expediente T-1350500 (*libertad de elección y de traslado entre las entidades del Sistema de Salud*). (310)

12. Expediente T-1645295 (*reglas de recobro*). (315)

13. Expediente T-1646086 (*reglas de recobro*). (324)

14. Expedientes T-1855574, T-1858995, T-1858999, T-1859088, T-1862038, T-1862046, T-1866944, T-1867317, y T-1867326 (*duda acerca de la inclusión del lente intraocular en el POS*). (334)

14.1. Expediente T-1855547. *Carlos Cortes Cortes contra Coomeva EPS. Juzgado Primero Penal Municipal de Tulúa, Valle.* (334)

14.2. Expediente T-1862046. *Carmen Raquel Betancourt de Villalobos contra Saludcoop EPS. El Juzgado Cuarto Penal Municipal de Barranquilla, Atlántico.* (335)

14.3. Expediente T-1866944. *Elvia Sánchez de Alonso contra Sanitas EPS. Juzgado Primero Municipal de Ibagué, Tolima.* (336)

14.4. Expediente T-1867317. *Enrieta Dolores Rodríguez Martes contra Saludcoop EPS. Juzgado Cuarto Civil Municipal de Barranquilla, Atlántico.* (337)

14.5. Expediente T-1862038. *Alba Isabel Pinto de Monroy contra Saludcoop EPS. Juzgado Veintitrés Civil Municipal de Cali, Valle.* (338)

14.6. Expediente T-1858999. *Alfonso Carmelo Villamil Fernández contra Salud total EPS. Juzgado Décimo Penal Municipal de Barranquilla, Atlántico.* (339)

14.7. Expediente T-1858995. *Enrique del Carmen Martínez Muñoz contra Saludcoop EPS. Juzgado Décimo Penal Municipal de Barranquilla, Atlántico.* (340)

14.8. Expediente T-1859088. *Mery Restrepo de Zuluaga contra Cafesalud EPS. Juzgado Segundo Civil Municipal de Barranquilla, Atlántico.* (341)

14.9. Expediente T-1867326. *Rosario Hincapié Salazar contra Saludvida EPS. Juzgado Segundo de Familia de Medellín, Antioquia.* (343)

## **II. Pruebas decretadas por la Sala de Revisión (344)**

### **Segundo Anexo**

#### **El derecho a la salud a la luz de los sistemas de protección de derechos humanos, internacional e interamericano (356)**

##### **1. Las primeras declaraciones de derechos (357)**

1.1. *Las declaraciones estadounidenses y francesas de derechos del siglo XVIII buscaban defender de forma prioritaria, pero no exclusiva, la libertad individual; el bienestar general también era su propósito.* (357)

1.2. *Las declaraciones en el contexto latinoamericano pensaron en el bienestar social.* (361)

1.3. *Los derechos sociales en declaraciones posteriores, durante el siglo XIX y principios del siglo XX.* (363)

1.4. *Conclusión.* (368)

##### **2. Los años de posguerra, la creación y consolidación de la Carta Internacional de derechos humanos (369)**

##### **3. La entrada en vigor de los Pactos Internacionales de derechos Humanos y desarrollo de los instrumentos de protección de derechos, regionales e internacionales para sujetos de protección especial (383)**

3.1. *Desarrollo del derecho a la salud en el ámbito internacional, durante los años setenta y los años ochentas.* (384)

3.2. *Desarrollo del derecho a la salud en el ámbito regional, durante los años setenta y los años ochentas.* (389)

3.3. *Conclusión.* (395)

##### **4. Los años noventa y comienzo del siglo XXI, desarrollo interpretativo de los textos que consagran la Carta Internacional de Derechos Humanos; la defensa del derecho fundamental a la salud (396)**

4.1. *Convención internacional sobre la protección de los derechos de todos los trabajadores migratorios y de sus familiares (1990).* (396)

4.2. *Principios para la protección de los enfermos mentales y el mejoramiento de la atención de la salud mental (1991).* (396)

4.3. *Declaración y Programa de acción de Viena (1993).* (397)

4.4. *La Recomendación general N° 24 (1999) sobre 'la mujer y la salud'.* (398)

4.5. *Las Observaciones del Comité de Derechos Económicos, Sociales y Culturales (CESCR).* (398)

Referencia: Expediente T-1315769

Solicitud de reserva del nombre en la publicación del auto 166 de 2006 y la sentencia T-760 de 2008

Magistrada Ponente:  
MARÍA VICTORIA CALLE CORREA

Bogotá, D.C., once (11) de noviembre de dos mil quince (2015).

La Sala Primera de Revisión de la Corte Constitucional, integrada por las magistradas María Victoria Calle Correa y Myriam Ávila Roldán, y el magistrado Luis Guillermo Guerrero Pérez, en uso de sus facultades constitucionales y legales, ha proferido el siguiente:

### **AUTO**

1. Que mediante auto 166 de 2006 la Sala Tercera de Revisión de la Corte Constitucional dispuso medidas cautelares orientadas a garantizar el acceso a los servicios de salud requeridos con necesidad por el accionante, en el marco de la acción de tutela instaurada contra Comfenalco EPS –entidad a la que estuvo afiliado en calidad de cotizante hasta el treinta (30) de enero de dos mil seis (2006), fecha en la que venció el periodo de protección laboral al que tenía derecho dada la terminación de su vínculo de trabajo–, por considerar que la negativa de esta EPS, de cubrirle el cien por ciento (100%) del costo de un examen, vulneraba sus derechos fundamentales a la vida, la salud, la seguridad social, la igualdad y la dignidad humana.
2. Que a través de la sentencia T-760 de 2008, la Sala consideró que Comfenalco EPS irrespetó grave y ostensiblemente el derecho a la salud del accionante al haber interrumpido los servicios de salud que requiere con necesidad, sin que otro prestador los haya asumido, para tratar la enfermedad de alto costo por él padecida. En razón de ello, resolvió revocar el fallo de instancia, tutelar el derecho a la salud del accionante y dejar en firme las medidas cautelares orientadas a garantizar el acceso a los servicios de salud que requiera el accionante, sin derecho de recobro por el pago de los mismos en la medida de que se trataba de servicios contemplados dentro del POS.
3. Que en escrito del ocho (08) de octubre de dos mil quince (2015), el peticionario solicitó ante esta Corporación el retiro de su nombre completo y demás datos que lo identifiquen, del expediente T-1315769, es decir, del auto 166 de 2006 y la sentencia 760 de 2008, con el fin de que se proteja su derecho a la intimidad personal. Lo anterior, por cuanto considera *“que dicha información debería ser personal y privada, teniendo en cuenta la magnitud*

*del caso y de lo negativo que podría [resultar para él] en una sociedad donde se discrimina y donde se rechaza”.*

4. Que si bien la Corte Constitucional puede decidir si mantiene en reserva los nombres reales de los accionantes en un proceso de tutela, con la finalidad de proteger su derecho a la intimidad, dicho procedimiento no se realizó en el caso del solicitante.

5. Que la reserva de los nombres se ha efectuado cuando la solicitud de amparo comprende aspectos íntimos de la persona, que pueden generar el deterioro innecesario de la imagen frente a sí mismo o ante la sociedad. Por ejemplo, algunos eventos en los que la Corporación ha protegido el derecho a la intimidad de los sujetos implicados en trámites de tutela, a través de la supresión de los datos que puedan permitir su identificación, implican escenarios de protección de derechos de la familia, los niños y las niñas, y los adolescentes; de personas intersexuales o con ambigüedad genital; de personas que conviven con VIH/SIDA o enfermedades catastróficas, u otras afectaciones del estado de salud; de personas LGBT, y de personas que han estado vinculadas en investigaciones de naturaleza penal.

6. Que desde el momento en que se profirió el auto 166 de 2006, cuyo asunto tuvo un desenlace definitivo en la sentencia T-760 de 2008, y la fecha de la solicitud de protección del derecho a la intimidad del accionante, han transcurrido un poco más de nueve años.

7. Que el auto 166 de 2006 y la sentencia T-760 de 2008 son documentos públicos que pueden ser consultados en la página web de la Corte Constitucional, pero también a través de otras páginas web públicas pertenecientes a sistemas y bases de datos de bibliotecas, universidades, centros académicos, etc., razón por la cual la supresión del nombre y los datos de identificación del accionante en el expediente T-1315769, que reposan en las providencias, y que se cuelgan en la página web de la Corte Constitucional, es una medida necesaria pero no suficiente para corregir el problema señalado por el peticionario, como quiera que dichos documentos podrían continuar siendo consultados en cualquier otra página que utilice la red Internet.

8. Que si bien la posibilidad de modificar el texto de una providencia de la Corte Constitucional que se encuentra en firme, solo procede cuando en la transcripción de la misma se producen errores o inconsistencias que puedan inducir a error, situación en la cual es aplicable el artículo 286 del Código General del Proceso, con el único fin de proceder a su corrección, ello no impide que la Corporación tome las medidas necesarias, después de la publicación de la providencia respectiva, para amparar los derechos fundamentales del interviniente en el trámite de la acción de tutela, dado que con la reserva del nombre no se altera el fondo de la decisión.

9. Que en este caso no se trata en realidad de la modificación de las providencias en firme mediante la supresión del nombre e identificación del

accionante y su reemplazo por datos ficticios, sino de la expedición de una nueva versión de las mismas para los fines de publicidad a través de la página web de la Corte Constitucional, de contenido similar a las originales pero con nombres ficticios para efectos de proteger el derecho a la intimidad del peticionario.

10. Que por lo anterior, la Sala ordenará que en toda publicación del auto 166 de 2006 y la sentencia T-760 de 2008 en la página web de la Corte Constitucional se suprima el nombre del accionante, al igual que los datos e informaciones que permitan su identificación. La Sala de Revisión ha preferido cambiar el nombre e identificación reales del accionante por datos ficticios, en lugar de sustituirlos por letras como acostumbra hacer la jurisprudencia constitucional en estos casos, para facilitar la lectura de las providencias y la comprensión de los hechos que dieron lugar a la acción de tutela de la referencia. Al tratarse de un nombre ficticio, este se escribirá en letra cursiva y no se usarán apellidos.

En mérito de lo expuesto esta Sala de Revisión

### **RESUELVE**

**Primero.-** Ordenar a la Secretaría General de la Corte Constitucional que los nombres y los datos que permitan identificar al accionante del expediente T-1315769, en el auto 166 de 2006 y la sentencia T-760 de 2008, sean suprimidos de toda publicación actual y futura.

**Segundo.-** Ordenar a la Relatoría de la Corporación que en la página web de la Corte Constitucional sean reemplazadas las versiones actuales del auto 166 de 2006 y la sentencia T-760 de 2008 por las que resulten de cambiar los nombres y datos de identificación del peticionario por datos ficticios, providencias que se anexan al presente auto.

**Tercero.-** Ordenar por Secretaría General al Juzgado Trece Civil Municipal de Medellín, que profirió el fallo de primera instancia en el proceso de tutela instaurado por *Eduardo* contra Comfenalco EPS, que se encargue de salvaguardar la intimidad del accionante, manteniendo la reserva sobre el expediente.

Notifíquese, comuníquese y cúmplase.

MARIA VICTORIA CALLE CORREA  
Magistrada

MYRIAM ÁVILA ROLDÁN

Magistrada (E)

LUIS GUILLERMO GUERRERO PÉREZ  
Magistrado

MARTHA VICTORIA SÁCHICA  
Secretaria General
