# Supplementary material
Source: publisher figshare collection journal article supplement (https://tandf.figshare.com/articles/dataset/_/10732607)
Supplement: Supplementary file 1 [file 2 › fjds_a_1690134_sm1381.pdf]

**EVALUACIÓN DEL PROGRAMA DE SANEAMIENTO DEL RÍO BOGOTÁ  
2008-2013**

**PLAN ANUAL DE ESTUDIOS PAE 2014**

**DIRECCIÓN DE ESTUDIOS DE ECONOMÍA Y POLÍTICA PÚBLICA**

**Bogotá, D.C. Diciembre 2014**

## **EVALUACIÓN DEL PROGRAMA DE SANEAMIENTO DEL RÍO BOGOTÁ**

Diego Ardila Medina  
Contralor de Bogotá, D.C.

Ligia Inés Botero Mejía  
Contralor Auxiliar

Ramiro Augusto Triviño Sánchez  
Director de Estudios de Economía y Política Pública

Carmen Aldana Gaviria  
Subdirectora de Estudios Económicos y Fiscales

Investigadores

Libia Esperanza Cuervo Páez  
Lucía del Rosario Agudelo Mejía  
Elimeleth Tapias Arias

## CONTENIDO

|                                                                                                         |    |
|---------------------------------------------------------------------------------------------------------|----|
| INTRODUCCIÓN .....                                                                                      | 4  |
| 1. MARCO CONCEPTUAL .....                                                                               | 7  |
| 1.1 LA REIVINDICACIÓN DE LA NATURALEZA .....                                                            | 7  |
| 2. POLÍTICA DE DESCONTAMINACIÓN DEL RÍO BOGOTÁ.....                                                     | 11 |
| 2.1 ACCIONES DE SOLUCION EJECUTADAS .....                                                               | 11 |
| 3. ESTADO DE LA CALIDAD DE LAS AGUAS DEL RIO BOGOTA.....                                                | 14 |
| 4. MODIFICACIÓN DE LA ESTRATEGIA DE DESCONTAMINACIÓN DEL RÍO BOGOTÁ.....                                | 16 |
| 4.1 GESTIÓN DE LAS ENTIDADES INVOLUCRADAS EN EL MEJORAMIENTO DE LA CALIDAD HÍDRICA DEL RÍO BOGOTÁ ..... | 17 |
| 4.1.1 Nivel nacional .....                                                                              | 18 |
| 4.1.2 Nivel departamental.....                                                                          | 18 |
| 4.1.3 Nivel distrital .....                                                                             | 19 |
| 4.2 AVANCES EN EL PROGRAMA DE SANEAMIENTO DEL RÍO BOGOTÁ.....                                           | 24 |
| 5. INVERSIONES RELACIONADAS CON LOS COMPONENTES DEL PROGRAMA DE SANEAMIENTO DEL RÍO BOGOTÁ.....         | 26 |
| CONCLUSIONES.....                                                                                       | 30 |
| REFERENCIAS.....                                                                                        | 32 |
| ANEXO.....                                                                                              | 34 |

*“Los países ricos en recursos naturales a menudo no siguen estrategias de crecimiento sostenible. No se dan cuenta de que si ellos no reinvierten su riqueza proveniente de los recursos naturales en inversiones productivas por encima del suelo, en los hechos, se están empobreciendo cada vez más”.* Joseph E. Stiglitz; De la maldición a la bendición de los recursos naturales; El Espectador, agosto de 2012.

## INTRODUCCIÓN

El río Bogotá es la cuenca principal del sistema hídrico de la ciudad y hace parte integral de la Estructura Ecológica Principal del Distrito Capital – EEP. El grado de contaminación del Río Bogotá ha llegado a tal extremo, que se ha llegado a clasificar, a este cuerpo hídrico superficial, como la alcantarilla a cielo abierto más grande de la ciudad y del país.

Su alto nivel de contaminación motivó, en los últimos veinte (20) años, una respuesta institucional, la cual desembocó en un conjunto de acciones a las que denominaremos “Programa de Saneamiento del Río Bogotá”.

No obstante, tal como lo ha observado esta Contraloría en el ejercicio del control fiscal y en evaluaciones puntuales efectuadas a dicho programa, los esfuerzos y los recursos invertidos han estado dispersos y desarticulados, de tal forma que las acciones ejecutadas han sido parciales y poco efectivas, lo cual no ha solucionado el problema de fondo.

En efecto, el recorrido por los distintos informes que se han generado en este ente de control, muestra que:

En el año 2003, la Auditoria Especial al Programa de Descontaminación del Río Bogotá – PDRB, puso en conocimiento de la ciudad lo desventajoso que resultó ser el Contrato de Concesión 015 de 1994, suscrito por el término de treinta (30) años, con el Consorcio conformado por SUEZ LYONNAISE DES EAUX Y DEGREMONT S.A. (cedido luego a la sociedad BOGOTANA DE AGUAS Y SANEAMIENTO - SUEZ LYONNASE DES EAUX DEGREMONT, E.S.P. S.A.), para el tratamiento de las aguas residuales de la ciudad que convergen al canal del Río Juan Amarillo o Salitre.

En el 2004, en Pronunciamiento sobre la estrategia de descontaminación del río Bogotá, se manifestó que:

Los recursos aplicados y los resultados obtenidos por la concesión, en términos de descontaminación, muestran un impacto desfavorable para las finanzas del Distrito, cuantificado en la suma de \$73.257 millones.

Falta gestión, de la Administración Distrital, para el recaudo de los recursos provenientes de las regalías, y de la tarifa diferencial establecida por la EAAB para las industrias contaminantes.

Se compraron predios en el Municipio de Soacha, en un área no compatible con el uso del suelo para la disposición final de biosólidos, por un valor de \$12.348 millones.

En el 2005, la evaluación del "Nuevo sistema de tratamiento del río Bogotá", evidenció que:

Presentaba un alto grado de incertidumbre, por cuanto no se tenían establecidas las fuentes de financiación, ni siquiera para las actividades programadas en el corto plazo.

En el Fondo Cuenta, a mayo de 2005, no se reportaban los recursos del 7.5% del impuesto predial correspondientes al 2004.

Las aguas tratadas seguían siendo vertidas aguas abajo de la ubicación de la PTAR al río Bogotá, sin que se les diera utilidad alguna.

El caudal promedio tratado en la PTAR El Salitre, aún no alcanzaba los 4 m<sup>3</sup>/seg.

En el 2006, la Auditoría Especial a la Contratación suscrita por el DAMA, encontró que se desistió de cobrar US \$29.555.911, por reclamaciones de pendientes, a causa de la terminación unilateral del contrato con BOGOTANA DE AGUAS Y SANEAMIENTO - SUEZ LYONNASE DES EAUX DEGREMONT, E.S.P. S.A.

Para el 2007, la Auditoría Regular, al entonces DAMA, evidenció el no cumplimiento de los porcentajes de remoción de DBO<sub>5</sub> (carga orgánica) y SST (carga inorgánica), el uso de químicos para mejorar la sedimentación y la incapacidad de la PTAR El Salitre para la captación del total del caudal del río Salitre, lo que motivó que se considerara la ampliación en el 100% de la capacidad de la PTAR y la implementación del tratamiento secundario, con miras a darle un uso a las aguas tratadas del canal Salitre.

Con base en lo anterior, este estudio se propuso investigar, con mayor amplitud, lo acontecido con el "Programa de Saneamiento del Río Bogotá" durante el período 2008-2013, lo cual se recoge aquí en siete secciones, siendo la primera esta introducción.

La segunda sección (capítulo 1), recoge algunos desarrollos teóricos, desde distintas disciplinas, en relación con los temas ambientales; la tercera sección (capítulo 2), efectúa un recorrido por la política de descontaminación del río Bogotá, en el marco de sus cinco componentes; la cuarta (capítulo 3), muestra la actuación de las distintas instancias e instituciones que intervienen en la descontaminación del río Bogotá, en el nivel nacional, departamental y distrital; la quinta sección (capítulo 4), destaca los avances que se han dado en el propósito de descontaminar el río; la sexta (capítulo 5), presenta la cuantificación de las inversiones efectuadas desde 2008 a 2013, en los distintos programas y proyectos que se han planteado, en los planes de desarrollo, para lograr la descontaminación; finalmente, la séptima sección recoge las conclusiones del trabajo.

## **1. MARCO CONCEPTUAL**

El interés de hoy por la descontaminación del río Bogotá, no se limita sólo al deseo romántico de los ambientalistas de ayer, por recuperar su disfrute físico y revertir las consecuencias medioambientales, sino al logro del equilibrio entre las actividades económicas, sociales y ambientales en su conjunto (desarrollo sostenible). En ese sentido, han concitado distintas disciplinas e investigadores, cada vez con mayor notoriedad y relevancia.

### **1.1 LA REIVINDICACIÓN DE LA NATURALEZA**

Las externalidades negativas que se derivan del estado de contaminación del río Bogotá, no se apartan de la crisis ambiental que vive el Planeta con fenómenos como el "calentamiento global".

En efecto, el alto índice de contaminación del río, hace que su condición de alcantarilla abierta emane gases efecto invernadero, constituyéndolo en un factor contribuyente al cambio climático de la ciudad y del Planeta.

De otra parte, la necesidad de la ciudad en torno a alimentar una mayor población, la ausencia de zonas cultivables en su área geográfica para satisfacer parte de la demanda de alimentos agrícolas, el deber del Estado de disminuir la pobreza, y la ausencia del río de generación de bienes y servicios ambientales, conllevan a que por encima del estado de sus aguas, se deje de lado su condición y sus aguas sean utilizadas para el riego de cultivos de hortalizas que se desarrollan a lo largo de su trayectoria, conllevando con ello a incrementar las externalidades del mismo, con efectos en el decaimiento del bienestar y la calidad de vida de los bogotanos asentados en sus proximidades y de aquellos que se abastecen de los productos regados con sus aguas.

Para tratar de entender, desde la economía, las necesidades para abordar la solución a los problemas como los del río Bogotá, han surgido nuevos desarrollos teóricos y empíricos, con la convergencia de las ciencias ya existentes.

- Economía Ambiental, Economía de Recursos Naturales y Bioeconomía

Desde la economía (economía neoclásica o convencional) surgen estas tres subdisciplinas, preocupadas por la asignación óptima de los recursos y la contaminación; la Economía Ambiental (EA) se interesa por la disposición de los residuos y la manera como éstos están afectado la atmósfera, la hidrósfera, la

biósfera y la pedósfera. En particular, está relacionada con la contaminación ambiental y la conservación de los ecosistemas y la biodiversidad.

La segunda (ERN), es definida como *"el estudio de la forma en que la sociedad asigna recursos naturales escasos, en términos monetarios respecto a fines medidos también en dinero (precios), tales como reservas pesqueras, plantaciones de árboles, agua dulce y petróleo..."*. Tanto la ERN como la EA surgieron a partir de los trabajos del profesor Pigou (economía del bienestar) y de Ronald Coase (el coste social); la primera para la gestión óptima de los recursos que usa el sistema económico, y la segunda, para la gestión de la contaminación óptima.

Según las críticas, estas dos subdisciplinas no son adecuadas *"para tratar problemas complejos, con incertidumbre y falta de información, que afectarán a generaciones futuras y con numerosos y diversos afectados en el presente, como ocurre por ejemplo con el cambio climático, acidificación de los océanos o el agotamiento de la naturaleza"*. Se argumenta, además, que *"ignoran cuestiones como el funcionamiento de los ecosistemas, el tamaño de la economía y la distribución de los beneficios y cargas ambientales en la sociedad"*.

La tercera subdisciplina (Bioeconomía), desarrollada por economistas de la escuela de Chicago (Becker, Hirshleifer y Tullock), buscó aplicar el análisis neoclásico de aspectos como escasez, competencia y egoísmo, en la explicación de la conducta en temas sociales (matrimonio, crimen, racismo, entre otros), y en la genética. Se argumentó, por ejemplo, que *"cuando sean identificados los genes de los deseos humanos se sabrá qué política tendrá efecto"*.

Como se deriva de los planteamientos anteriores, la economía convencional, desde sus fundamentos, consideró a los recursos naturales como bienes libres gratuitos e indestructibles y a los residuos como carentes de valor e interés. De ahí que, para esta disciplina, la naturaleza tiene un papel secundario o nulo en la producción comparado con el capital y el trabajo.

- Economía Ecológica, Economía Verde y Bioeconomía

Aunque estas disciplinas tienden a confundirse, las diferencia el enfoque que se da a cada una; de hecho, economía verde se refiere a un enfoque ecointegrador<sup>1</sup>, y Bioeconomía o Economía Biológica (concepto anterior en el tiempo a la Bioeconomía de la escuela de Chicago), investiga el sistema socioeconómico en asociación con el sistema biológico como un todo; de hecho, para Georgescu-

---

<sup>1</sup> Ver Jacobs, Michael (1996), la economía verde, Barcelona: Icaria; y Naredo, José M. (1987), La economía en evolución. Historia y perspectivas de las categorías básicas del pensamiento económico, Madrid: Siglo XXI.

Rogen *"el proceso económico no es un proceso aislado y autónomo, y no puede funcionar sin un intercambio continuo que altera el entorno de modo acumulativo, ni tampoco sin verse influido por esas alteraciones"*.<sup>2</sup>

Esta disciplina plantea como su principal objetivo: *"servir de puente entre la ciencia empírica de la Biología y la ciencia literaria de la Economía y acabar con la desunión y separación de "las dos culturas"*.

De otro lado, la Economía Ecológica (EE) se concibe como *"un conjunto de modelos de producción integral e incluyente que toma en consideración variables ambientales y sociales"*<sup>3</sup>; su campo de estudio es transdisciplinar; esto es, cada experto de una ciencia conoce un poco de otras, lo que permite la comunicación y la fusión de conocimientos para afrontar mejor los problemas. En efecto, el origen de este campo se atribuye a economistas como Nicholas Georgescu-Roegen, Herman E. Daly, Kenneth Boulding, Karl W. Kapp, Robert Ayres, y a biólogos como Alfred Lotka, Holling, Eugene y Howard T. Odum.

Esta disciplina busca la sostenibilidad de las interacciones entre el "Macro Sistema Natural" y los subsistemas social y económico. La sostenibilidad se entiende como *"la capacidad de la humanidad para vivir dentro de los límites ambientales"*; mientras que las interacciones, expresan que *"ninguna disciplina aislada proporciona una perspectiva suficiente ante la magnitud y complejidad de la problemática ambiental planetaria"*.

La Economía Ecológica relaciona crecimiento económico y el aumento en la explotación de insumos materiales y energéticos. De hecho, su ámbito de estudio se ha ampliado a: índices físicos de (in)sostenibilidad, huella ecológica, huella hídrica, tamaño de la economía y límites al crecimiento económico, la medida del bienestar, ecologismo de los pobres (activismo de personas amenazadas por la destrucción de recursos y servicios ambientales que necesitan para vivir), los trabajos no remunerados, distribución justa de la renta, deuda ecológica, evolución de sistemas ecológicos y económicos, biodiversidad, relación de los derechos de propiedad y la gestión de recursos naturales, instrumentos de política ambiental, la justicia ambiental, y el metabolismo social, entre otros temas.

El concepto de sostenibilidad ecológica de la EE es diferente al de sostenibilidad económica de la EA-ERN; de hecho, el primero critica la contabilidad

---

<sup>2</sup> Ver Dragan J.C. y Demetrescu, M.C. (1991) Entropy and bioeconomics. The new paradigm of Nicholas Georgescu-Roegen, Roma: Nagard.

<sup>3</sup> A diferencia de la denominada "economía marrón" que se define como *"la administración eficaz y razonable de los bienes que se basa en la persecución del crecimiento económico a través del uso óptimo de insumos y factores de producción"*.

macroeconómica elaborada por la Economía Convencional y propone a cambio un conjunto de indicadores físicos y sociales, además de los monetarios.

Con base en tales indicadores, la EE analiza el funcionamiento de las economías y la gestión de recursos y residuos; para ello, se toma de la Física (la termodinámica), de la Biología (el conocimiento de los ecosistemas), de la Geología (los yacimientos minerales de la corteza terrestre), de la Antropología y Sociología (análisis de balances energéticos y de otras sociedades e instituciones), y de la Ecología Industrial (la ecología como marco y modelo para la industria).

En esta disciplina, la gestión de recursos y residuos debe tomar en cuenta que la "aportación gratuita de la naturaleza" no exime de considerar aspectos como el *coste físico de reposición* para orientar mejor la gestión de recursos minerales, y un amplio conocimiento de las ciencias físicas y biológicas para mejorar la gestión del agua, bosques, pesquerías, etc.

Bajo el anterior contexto, y en palabras de sus exponentes, "la EE pretende cerrar un largo período de separación entre la economía, la naturaleza y la sociedad cuyos resultados en términos de destrucción ambiental e injusticia social entiende que son evidentes"<sup>4</sup>.

---

<sup>4</sup> Ver autores como Martínez Alier, Joan y Schlüpmann, Klaus (1991), La ecología y la economía, México D.F.: Fondo de Cultura Económica.

## **2. POLÍTICA DE DESCONTAMINACIÓN DEL RÍO BOGOTÁ**

En el marco de lo enunciado en el capítulo anterior, es decir para tratar de valorar económicamente lo que la situación de contaminación del río representa para el desarrollo de la ciudad, se cita el informe de la Comisión Económica Para América Latina y El Caribe - CEPAL, presentado en Cartagena de Indias el 27 de agosto de 2010, que con base en los datos aportados por el Banco Mundial, calculó el valor de la externalidad negativa anual de la condición de contaminación del río en US\$57.711 millones, representada por los bienes y servicios ambientales de los cuales no se puede hacer uso por el estado actual del río Bogotá, cifra que equivale al 77,4% del PIB del Distrito Capital, en pesos de 2013.

Ello implicaría que \$135,02 billones tendrían que ser destinados por el distrito anualmente, única y exclusivamente para contrarrestar los efectos negativos de la contaminación de la arteria hídrica de la ciudad. Dicho de otra manera, de no hacerse nada ese sería el monto anual que pierden los bogotanos por el daño sobre los bienes y servicios naturales potenciales que ofrecería el río descontaminado.

La anterior afirmación, fue estimada teniendo en cuenta las condiciones físico, químicas y bacteriológicas del río, a causa de las descargas contaminantes que la ciudad le aporta al río, a través de los vertimientos cuyo caudal se calculaba en aproximadamente 15 m<sup>3</sup>/s de aguas residuales sin tratamiento y 4m<sup>3</sup>/s de las aguas tratadas en la Planta de Tratamiento de Aguas Residuales El Salitre - PTAR Salitre; la eficiencia de esta última en la actualidad no permite el uso de las aguas tratadas para ningún tipo de actividad productiva, recreativa o de consumo<sup>5</sup>.

### **2.1 ACCIONES DE SOLUCION EJECUTADAS**

Alrededor del análisis de la solución de la problemática del mencionado río se identificó como prioridad, la construcción de infraestructura tanto para la separación de redes pluviales y de aguas negras, como para el tratamiento de las aguas residuales que produce la ciudad.

---

<sup>5</sup> Lo dicho se ratifica con la remoción de 32.6%, promedio mensual del período comprendido entre junio de 2012 y junio de 2013, de DBO<sub>5</sub> obtenida en el tratamiento de las aguas residuales de la Planta de Tratamiento de El Salitre, cifra que se encuentra 5% por debajo de los estándares establecidos para dicha Planta.

No obstante que la ciudad aporta cerca del 90% del total de la carga contaminante al río, y que en sus primeros intentos la capital identificó los elementos, acciones, recursos, instituciones del orden distrital, dentro del Programa de Saneamiento, los escasos resultados obtenidos de las mismas, sumado a las acciones ciudadanas ante los organismos de justicia, desembocaron en mandatos legales de la Corte Suprema de Justicia y del Tribunal Administrativo de Cundinamarca, que obligan a las entidades involucradas, a lo largo de la totalidad de su cuenca, a realizar acciones para descontaminarlo.

Así, la gestión de descontaminar el Río Bogotá ha estado enmarcada, en los diferentes niveles administrativos, representados tanto por las autoridades ambientales involucradas en el tema, Ministerio de Ambiente y Desarrollo Sostenible - MADS, Corporación Autónoma Regional de Cundinamarca –CAR- y Secretaría Distrital de Ambiente –SDA-, como por las entidades del orden municipal y departamental.

En el caso del Distrito Capital, se identifican no sólo la SDA sino la “Empresa de Acueducto, Alcantarillado y Aseo de Bogotá ESP” - EAB, entidades que han formulado, implementado y/o ejecutado acciones desde las dos décadas anteriores.

No obstante, a pesar de haberse ejecutado acciones institucionales, los resultados de la ejecución del Programa, en la práctica, como se evidenció al comienzo de este capítulo, se han quedado cortos, y evidencian que en lugar de avanzar en el mejoramiento de la calidad de esta importante arteria hídrica, ha habido un retroceso y un incremento en la contaminación de sus aguas, producto de la falta de cohesión y coordinación interinstitucional.

Lo anterior, se ilustra en el incumplimiento de las metas formuladas en los siguientes cinco componentes, que tradicionalmente se han identificado dentro del programa, el cual está a cargo de la autoridad ambiental urbana -SDA y de la empresa de servicios públicos - EAB<sup>6</sup>:

Reducción del volumen de aguas residuales que van al sistema de alcantarillado, mediante el acompañamiento y asesoría a medianas y pequeñas industrias para

---

<sup>6</sup>ACUERDO 15 DE 2013 (Septiembre 19). Por el cual se modifica parcialmente el Acuerdo No. 11 del 13 de septiembre de 2010. LA JUNTA DIRECTIVA DE LA EMPRESA DE ACUEDUCTO Y ALCANTARILLADO DE BOGOTÁ E.S.P., En ejercicio de sus facultades legales y estatutarias consagradas en el Decreto – Ley 1421 de 1993, en su “ARTÍCULO 2º - Denominación: La Empresa de Acueducto y Alcantarillado de Bogotá se denominará “EMPRESA DE ACUEDUCTO, ALCANTARILLADO Y ASEO DE BOGOTÁ ESP” La Empresa podrá identificarse para todas sus actuaciones jurídicas y comerciales con la sigla “EAB ESP”

uso eficiente y racional del agua (a cargo de la autoridad ambiental SDA). Se deja de lado la exigencia de los programas de ahorro y uso eficiente de agua, para todos los usuarios del recurso (Ley 373 de 1997). Tampoco se han hecho efectivas las metas de reducción de pérdidas del agua, y el reúso obligatorio, derivadas de campañas educativas a la totalidad de los usuarios.

Garantía del cumplimiento de la calidad de las aguas residuales al momento de verterlas, conforme los niveles de contaminación permisibles establecidos en la normatividad ambiental, a través del control de vertimientos (a cargo de la autoridad ambiental SDA). El enfoque se realizó únicamente para los usuarios industriales, de los cuales sólo son objeto de control por parte de la SDA un 8.1% de la totalidad.

Separación del sistema de captación y conducción de las aguas residuales y las aguas lluvias en la ciudad, mediante el diseño y construcción de la infraestructura requerida para separar las aguas residuales de las aguas lluvias (A cargo de la Empresa de Acueducto y Alcantarillado EAB). Aún no se termina la construcción de interceptores y colectores programados.

Protección de la alteración del sistema hídrico, ésta última derivada de las actividades antrópicas que se desarrollan en la ciudad, mediante el desarrollo de acciones como dragado (limpieza de lodos) de la base de los cauces, manejo y conservación de las rondas de los ríos y humedales (a cargo de la SDA y la EAB). La falta de cultura ciudadana hace que sigan llegando a la infraestructura de alcantarillado y a las fuentes superficiales de aguas que alimentan el río Bogotá, toneladas de desechos sólidos y químicos que incrementan la afectación de la calidad hídrica del río.

Construcción de Plantas de Tratamiento de Aguas Residuales – PTAR. La única construida hasta hoy es la Planta de Tratamiento de Aguas Residuales El Salitre PTAR El Salitre, la cual no alcanza la eficiencia de tratamiento de las aguas conforme a los parámetros establecidos en la Licencia Ambiental.

### 3. ESTADO DE LA CALIDAD DE LAS AGUAS DEL RÍO BOGOTÁ

Según el DAMA, "...en 1995, la contaminación orgánica hídrica total de la ciudad era de 12.43 toneladas/mes de Sólidos Suspendidos Totales (SST), es decir 0.414 toneladas día (414.33 kg/día) y a 11.13 toneladas/mes de Demanda Bioquímica de Oxígeno a los cinco días. (DBO<sub>5</sub>), 0.371 Ton/día (371.0 Kg/día)..." cifra que representaba 149,16 y 133.56 toneladas al año de SST y DBO<sub>5</sub> respectivamente; además "en esta época el sector industrial localizado en la ciudad aún no presentaba un conocimiento amplio, ni un compromiso moral alto, como para haber iniciado procesos de gestión ambiental al interior de cada una de las empresas, ocasionado esto posiblemente por la débil divulgación de las normas ambientales específicas para la ciudad y los bajos niveles de gestión de la autoridad ambiental, en cuanto a establecimientos identificados"<sup>7</sup>.

Si bien, se identificó la situación del río como preocupante en el año 1995, en los años subsiguientes la misma ha tenido una tendencia creciente y proporcional al crecimiento de la población y la actividad industrial.

En efecto, según el informe de la CEPAL del 2010, la carga orgánica presente en las descargas de aguas negras en el mencionado río, supera en un 44% los estándares que fueron identificados en el Decreto 1594 de junio de 1984, norma vigente para esa época, y que indica que el estado de la calidad del agua sigue estando por debajo de lo exigido normativamente por lo que no permite su uso<sup>8</sup>.

Si se comparan los resultados de los años anteriores con la realidad actual del río, la situación ha alcanzado tal magnitud que su solución se torna cada vez más distante y adquiere características de irreversibilidad.

Lo enunciado se evidencia con la tendencia incremental de los aportes de contaminación inorgánica (SST) y orgánica (DBO<sub>5</sub>) que han llegado al río Bogotá en los últimos años, en tanto la relación comparativa de las cargas, entre los años 1995 y 2013, equivalen a una proporción de 1:597 y 1:567 respectivamente.

De manera gráfica, se observa a continuación la tendencia creciente de las cargas contaminantes que llegaron al río Bogotá en los últimos seis años.

---

<sup>7</sup> Auditoría Gubernamental con Enfoque Integral Modalidad Especial, al Programa de Descontaminación del Río Bogotá – PDRB, entre el 30 de diciembre de 2002 y el 15 de abril de 2003.

<sup>8</sup> En el 2013 el Subíndice del Estado del Agua SEA (Adimensional), publicado en el observatorio ambiental de Bogotá, fue de 44.50 cifra que describe al agua superficial de la ciudad en el límite inferior de la categoría marginal, que significa que no cumple con los objetivos y frecuentemente las condiciones deseables están amenazadas.

**Gráfica 1**  
**Carga de materia orgánica Demanda Biológica de Oxígeno DBO aportada al Río Bogotá (ton/año)**

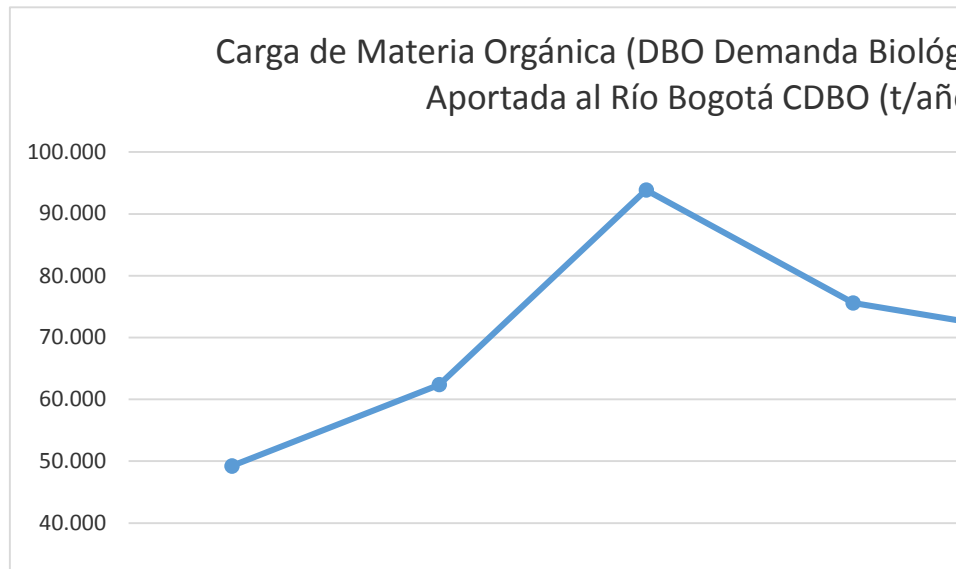

Fuente: Observatorio Ambiental de Bogotá D.C. 26 de noviembre de 2014.

**Gráfica 2**  
**Carga de Sólidos Suspendidos Totales transportados al Río Bogotá SST (ton/año)**

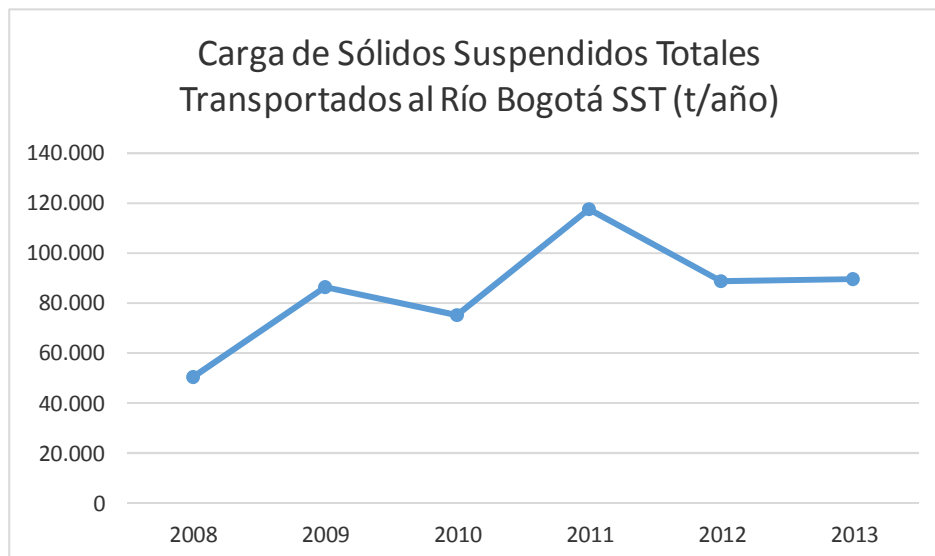

Fuente: Observatorio Ambiental de Bogotá D.C. 26 de noviembre de 2014.

#### **4. MODIFICACIÓN DE LA ESTRATEGIA DE DESCONTAMINACIÓN DEL RÍO BOGOTÁ**

Los primeros estudios del problema de contaminación del Río Bogotá datan de principios del siglo XX<sup>9</sup>, donde el mayor énfasis se desarrolló en los años setenta con la orientación de la Corporación Autónoma de Cundinamarca<sup>10</sup> - CAR y la EAB.

No obstante ese antecedente, se identificó que el componente No. 5 del programa de descontaminación del Río Bogotá en el Distrito tuvo sus inicios en el año 1994, con la firma del contrato No 015 entre el Distrito la firma Suez-Lyonnaise des Eaux - Ondeo Degrémont, S.A., por un período de 30 años para *"...el tratamiento de las aguas residuales de Santa Fe Bogotá, Distrito Capital, por el sistema de concesión, a través de las Plantas de El Salitre, Fucha y Tunjuelo..."*<sup>11</sup> ,.

En septiembre de 1997 dicho consorcio cedió el contrato mencionado a la firma Bogotana de Aguas y Saneamiento (BAS) Suez-Lyonnaise des Eaux - Ondeo Degrémont, la cual inicia la construcción de la PTAR El Salitre, que en el año 2000, una vez finalizada, se puso en marcha con la Fase I del tratamiento primario de las aguas residuales la cual incluye la remoción de los sólidos insolubles como arena y materiales como grasas, espuma y materia orgánica sedimentable.

Dicha PTAR El Salitre, hasta junio de 2004 fue operada bajo la modalidad BOOT<sup>12</sup> por la firma Bogotana de Aguas y Saneamiento (BAS) Suez-Lyonnaise des Eaux - Ondeo Degrémont; y a partir de esa fecha, la operación, mantenimiento y administración de las instalaciones de la PTAR, quedó a cargo de la Empresa de Acueducto y Alcantarillado de Bogotá –EAB-, y la función de establecer las condiciones de uso y tenencia de dicha planta, quedó a cargo del Departamento Técnico Administrativo del Medio Ambiente –DAMA-, en concordancia con el Decreto 043 de 2004 *"Por el cual se efectúan unas asignaciones en relación con la operación, mantenimiento y administración de la Planta de Tratamiento de Aguas Residuales el Salitre –PTAR El Salitre"*.

<sup>9</sup> En 1907 la firma inglesa Pearson recomendó la depuración de las aguas servidas de la ciudad antes de su carga al río Bogotá.

<sup>10</sup> Creada mediante la LEY 3 DE 1961 "por la cual se crea la Corporación Autónoma Regional de la Sabana de Bogotá y de los Valles de Ubaté y Chiquinquirá". <http://portal.dafp.gov.co/> 11.11.2014.

<sup>11</sup> [www.procuraduria.gov.co](http://www.procuraduria.gov.co) 11.11.2014

<sup>12</sup> BOOT (Build, Operate, Own, Transfer), es una modalidad de contrato según el cual una compañía privada se compromete a construir y operar, ser propietario y después transferir los activos a la administración. Dada la magnitud de las inversiones esta clase de contratos se suelen suscribir por períodos largos de tiempo, 20 a 25 años. JUAN JOSE MIRANDA MIRANDA GLOSARIO 148. [www. antioquia.gov.co/antioquia-v1/organismos/planeacion/descargas/banco\\_proyectos/libro/12\\_fuentes\\_financiacion.pdf](http://www.antioquia.gov.co/antioquia-v1/organismos/planeacion/descargas/banco_proyectos/libro/12_fuentes_financiacion.pdf); 24/09/2014

Sin embargo, los resultados del primer año de operación de la PTAR El Salitre, condujeron a concluir que el Contrato de Concesión 015 de 1994 era oneroso para las arcas distritales, puesto que la cancelación mensual, de cerca de \$6.500 millones al concesionario, no satisfacía las necesidades del servicio y la calidad de las aguas tratadas no permitiendo su uso, conforme a las exigencias ambientales ni siquiera para riego, razón por la cual debían ser vertidas nuevamente al Río Bogotá.

En el cuadro 1, se realiza un comparativo entre las políticas, anterior y actual del saneamiento del Río Bogotá.

**Cuadro 1**  
**Comparativo de políticas**

| <b>POLITICA ANTERIOR</b>                                                                                                                                                                               | <b>POLITICA ACTUAL</b>                                                                                                                                                                                                                                                                                                                                                                                                                                                                                                |
|--------------------------------------------------------------------------------------------------------------------------------------------------------------------------------------------------------|-----------------------------------------------------------------------------------------------------------------------------------------------------------------------------------------------------------------------------------------------------------------------------------------------------------------------------------------------------------------------------------------------------------------------------------------------------------------------------------------------------------------------|
| Se concibieron los cinco componentes antes mencionados.                                                                                                                                                | Se siguen planteando los cinco componentes.                                                                                                                                                                                                                                                                                                                                                                                                                                                                           |
| El quinto componente se desarrollaría con la construcción escalonada de tres Plantas de Tratamiento de Aguas Residuales - PTAR en cercanías de la desembocadura de los ríos Salitre, Fucha y Tunjuelo. | Se modifica el quinto, en los siguientes términos:<br><br>La PTAR el Salitre se amplía al doble de su capacidad actual (de 4 metros <sup>3</sup> pasará a 8 metros <sup>3</sup> ) y se adicionará el tratamiento químicamente asistido, para mejorar las aguas tratadas y usarlas para riego.<br>Se rediseña los colectores e interceptores de Engativá-Cortijo.<br>Se construirá la PTAR Canoas en el municipio de Soacha (área conocida como Canoas).<br>Se rediseña la construcción de colectores e interceptores. |

Fuente: Contraloría de Bogotá, EAB

#### **4.1 GESTIÓN DE LAS ENTIDADES INVOLUCRADAS EN EL MEJORAMIENTO DE LA CALIDAD HÍDRICA DEL RÍO BOGOTÁ**

El Distrito Capital le aporta cerca del 90% de la carga contaminante al Río Bogotá en su cuenca media, que coincide con el límite occidental de la ciudad, y los municipios ubicados en la cuenca alta y baja del mismo, el 10% restante, por lo tanto es responsabilidad de las autoridades ambientales con jurisdicción en la cuenca, realizar los controles pertinentes conforme a la normatividad vigente y aplicable, sobre los vertimientos de aguas residuales a través del seguimiento, monitoreo y/o aplicación de las sanciones y/o multas a los usuarios identificados en la Ley por incumplimiento normativo.

La gestión interinstitucional e integral, con miras a descontaminar este cuerpo de agua, para que cumpla con las características de uso que fueron identificadas dentro del programa, incluye las acciones ejecutadas por entidades del orden nacional, regional y distrital.

#### **4.1.1 Nivel nacional**

Ministerio de Ambiente y Desarrollo Sostenible. Siendo la cabeza de las autoridades ambientales en Colombia, es el encargado de dictar los lineamientos alrededor del uso de recurso hídrico a nivel nacional, en ese sentido se encuentra desarrollando las normas que fijan los parámetros y límites que, en el futuro, identificarán tanto las condiciones de los vertimientos de aguas residuales al suelo, a los alcantarillados y a los cuerpos hídricos superficiales y subterráneos, como el uso del recurso para la ejecución de las diferentes actividades antrópicas.

#### **4.1.2 Nivel departamental**

Corporación Autónoma Regional de Cundinamarca –CAR-. Es la autoridad ambiental regional, y tiene como función velar por la calidad del río, conforme a los objetivos trazados para cada tramo de su recorrido, según el acuerdo 43 de 2006; además es la encargada de modificar el Plan de Ordenamiento y Manejo de la Cuenca Hidrográfica – POMCA del río Bogotá, instrumento de planificación de calidad que, una vez ejecutoriada la Sentencia del Consejo de Estado, identifica los actores y las acciones a ejecutar, contará con una plazo de 20 meses para su modificación es decir la ordenación de la cuenca y 24 meses para la conservación del Páramo de Guacheneque y protección de los nacimientos de agua que hacen parte de la cuenca y 12 meses para la protección del Distrito de Manejo Integrado del Salto de Tequendama.

Ampliación de la PTAR Salitre en caudal y capacidad de tratamiento y la construcción de la PTAR Canoas que se ubicará aguas debajo de la desembocadura del río Tunjuelo.

El desarrollo de la labor de dicha autoridad, se realiza a través de la Comisión Conjunta conformada conjuntamente con Corporinoquia y la Corpoguavio.

#### **4.1.3 Nivel distrital**

Las entidades distritales que ejecutan acciones tendientes al Saneamiento del Río Bogotá son: SDA y EAB

En el marco de jurisdicción del ejercicio del control fiscal de la Contraloría de Bogotá, a continuación se presentan los recursos económicos programados y ejecutados por las siguientes entidades distritales antes mencionadas.

##### *4.1.3.1 Secretaría distrital de ambiente –SDA*

La Secretaría Distrital de Ambiente – SDA, es la autoridad ambiental en el perímetro urbano de la ciudad, y tiene como función realizar tanto el control de vertimientos de las aguas residuales efectuados al canal Torca y a los ríos Salitre, Fucha, y Tunjuelo, los cuales recorren en sentido oriente - occidente la ciudad y desembocan en el Río Bogotá, como el monitoreo, seguimiento y evaluación de la carga contaminante que es aportada, y además vigila que se cumplan los objetivos del Plan de Saneamiento y Manejo de Vertimientos - PSMV de Bogotá, los cuales están en concordancia y coherencia con las exigencias de la sentencia mencionada.

En desarrollo de los proyectos 572 *“Control ambiental de los factores de deterioro que impactan la calidad del ambiente urbano”* del Plan de Desarrollo Bogotá Positiva y el 820 *“Control ambiental a los recursos hídrico y suelo en el Distrito Capital”* del Plan de Desarrollo Bogotá Humana, la SDA ejecuta las actividades de control de los vertimientos que se realizan a los cuerpos de agua, por parte del sector industrial asentado en el área de su jurisdicción.

*"Por un control fiscal efectivo y transparente"*

En el cuadro 2, se evidencian las acciones ejecutadas en los proyectos institucionales de la SDA mencionados anteriormente.

**Cuadro 2**  
**Acciones ejecutadas por la SDA**

| Proyecto                                                                                      | Vigencia                                                                    | Meta del proyecto                                                                                                                             | Actividad                                                                                                                      |           | Inversión      |                |               |
|-----------------------------------------------------------------------------------------------|-----------------------------------------------------------------------------|-----------------------------------------------------------------------------------------------------------------------------------------------|--------------------------------------------------------------------------------------------------------------------------------|-----------|----------------|----------------|---------------|
|                                                                                               |                                                                             |                                                                                                                                               | Programado                                                                                                                     | Ejecutado | Programado     | Ejecutado      |               |
| 572 Control ambiental a los factores de deterioro que impactan la calidad del ambiente urbano | 2008                                                                        | Desarrollar el 100% de las herramientas de control sobre sectores prioritarios en materia de descargas y captación de agua                    | 30%                                                                                                                            | 30%       | 221.000.000    | 221.000.000    |               |
|                                                                                               |                                                                             | Ejecutar el programa de seguimiento y monitoreo de afluentes                                                                                  | 16,5%                                                                                                                          | 15,18%    | 700.000.000    | 700.000.000    |               |
|                                                                                               |                                                                             | Desarrollar el 100% de los elementos que permitan el cumplimiento de los objetivos de calidad de agua para los rios Salitre, Fucha y Tunjuelo | 30%                                                                                                                            | 30%       | 30.000.000     | 30.000.000     |               |
|                                                                                               | 2009                                                                        | Desarrollar el 100% de las herramientas de control sobre sectores prioritarios en materia de descargas y captación de agua                    | 60                                                                                                                             | 30        | 2.993.252.906  | 2.942.306.219  |               |
|                                                                                               |                                                                             | Ejecutar tres fases del programa de seguimiento y monitoreo a efluentes y afluentes                                                           | 0,54                                                                                                                           | 0,477     | 60.106.667     | 60.106.667     |               |
|                                                                                               |                                                                             | Desarrollar 100% elementos que permitan el cumplimiento de los objetivos de calidad de los rios Salitre, Torca, Fucha y Tunjuelo              | 50                                                                                                                             | 17        | 1.121.474.869  | 1.108.357.951  |               |
|                                                                                               | 2010                                                                        | Desarrollar el 100% de las herramientas de control sobre sectores prioritarios en materia de descargas y captación de agua                    | 73,5%                                                                                                                          | 72,70%    | 3.959.101.324  | 3.902.077.669  |               |
|                                                                                               |                                                                             | Ejecutar tres fases del programa de seguimiento y monitoreo a efluentes y afluentes                                                           | 0,95                                                                                                                           | 0,57      | 596.646.008    | 596.646.008    |               |
|                                                                                               |                                                                             | Desarrollar 100% elementos que permitan el cumplimiento de los objetivos de calidad de los rios Salitre, Torca, Fucha y Tunjuelo              | 70%                                                                                                                            | 70%       | 1.042.022.437  | 1.042.022.437  |               |
|                                                                                               | 2011                                                                        | Desarrollar el 100% de las herramientas de control sobre sectores prioritarios en materia de descargas y captación de agua                    | 81,3%                                                                                                                          | 81,29%    | 1.010.030.508  | 992.388.591    |               |
|                                                                                               |                                                                             | Ejecutar dos fases del programa de seguimiento y monitoreo a efluentes y afluentes                                                            | 0,01                                                                                                                           | 0,01      | 268.000.000    | 268.000.000    |               |
|                                                                                               |                                                                             | Desarrollar 100% elementos que permitan el cumplimiento de los objetivos de calidad de los rios Salitre, Torca, Fucha y Tunjuelo              | 90%                                                                                                                            | 89,24%    | 1.229.455.000  | 1.229.455.000  |               |
|                                                                                               | 2012                                                                        | Desarrollar el 100% de las herramientas de control sobre sectores prioritarios en materia de descargas y captación de agua                    | 99,96%                                                                                                                         | 99,96%    | 488.193.862    | 488.193.862    |               |
|                                                                                               | 820 Control ambiental a los recursos hídrico y suelo en el Distrito Capital | 2012                                                                                                                                          | Controlar 7.804 establecimientos que generan vertimientos a través de la emisión de conceptos técnicos y actos administrativos | 602       | 451            | 1.542.447.551  | 1.542.447.551 |
|                                                                                               |                                                                             |                                                                                                                                               | Ejecutar cuatro fases del programa de monitoreo a afluentes y efluentes en el Distrito Capital                                 | 1         | -              | 3.701.253      | 0             |
| Ejecutar cinco programas de operación de la red de calidad hídrica de Bogotá                  |                                                                             |                                                                                                                                               | 1                                                                                                                              | 1,00      | 1.426.089.243  | 1.426.089.243  |               |
| 2013                                                                                          |                                                                             | Controlar anualmente 2.000 establecimientos que generan vertimientos a través de actuaciones tecnico administrativas                          | 2.000                                                                                                                          | 2.000     | 2.907.124.598  | 2.907.124.598  |               |
|                                                                                               |                                                                             | Ejecutar cuatro fases del programa de monitoreo a afluentes y efluentes en el Distrito Capital                                                | 1                                                                                                                              | 0,85      | 249.614.252    | 249.614.252    |               |
| 2014 a Junio de 2014                                                                          |                                                                             | Controlar anualmente 2.000 establecimientos que generan vertimientos a través de actuaciones tecnico administrativas                          | 2.000                                                                                                                          | 1.032     | 1.967.205.000  | 1.867.497.760  |               |
|                                                                                               |                                                                             | Ejecutar tres fases del programa de monitoreo a afluentes y efluentes en el Distrito Capital                                                  | 1                                                                                                                              | -         | 314.950.000    | 0              |               |
|                                                                                               |                                                                             | Ejecutar cinco programas de operación de la red de calidad hídrica de Bogotá                                                                  | 1                                                                                                                              | -         | 574.686.000    | 0              |               |
| TOTAL                                                                                         |                                                                             |                                                                                                                                               |                                                                                                                                |           | 22.705.101.478 | 21.573.327.808 |               |

Fuente: SDA, 2014<sup>13</sup>

<sup>13</sup> Radicado SDA2014EE165580 de SDA del 22 de Octubre de 2014 como respuesta al radicado 2014ER161071- Plan Anual de Estudios -PAE Evaluación al programa de Saneamiento del Río Bogotá de la Contraloría de Bogotá

En el cuadro anterior se evidencia que si bien, durante las vigencias analizadas, la ejecución presupuestal es alta, en el año 2012 y a 30 de junio del presente año las actividades del programa de monitoreo a afluentes y efluentes en el Distrito Capital no presentaron ningún avance, lo cual conlleva a un mayor deterioro del cuerpo de agua que es la columna vertebral hídrica de la ciudad.

La gestión en materia de vertimientos, se efectúa por dicha autoridad a través de las Subdirecciones del Recurso Hídrico y del Suelo –SRHS- y de Control Ambiental al Sector Público –SCASP-. Con base en la información suministrada por la entidad<sup>14</sup>, *"... en las bases de datos de la SRHS el total de usuarios que requieren permiso es de 5.495, de los cuales 5.049 no cuentan con él, lo que equivale al 91.9%", se identificó que sólo al 8% de los usuarios, se les efectúa el control y monitoreo respectivo, situación que pone de manifiesto que la autoridad ambiental del Distrito Capital no ejecuta acción efectiva en torno a controlar que dichos vertimientos cumplan con la normatividad respectiva, ello significa que la carga contaminante se vierte a los cuerpos hídricos sin ninguna vigilancia, aumentándose el riesgo de incrementar la carga contaminante del Río Bogotá.*

De otra parte, la estrategia del control de vertimientos (Gráfico 3), que incluye el cumplimiento de la normatividad, está regulada por la Resolución 3957 de 2009 proferida por la SDA, *"Por la cual se establece la norma técnica, para el control y manejo de los vertimientos realizados a la red de alcantarillado público en el Distrito Capital"*, la cual tiene por objeto *"...establecer, la norma técnica para el control y manejo de los vertimientos de aguas residuales realizados al sistema de alcantarillado público en Bogotá D.C., al tiempo que fija las concentraciones o estándares para su vertido"*, procedentes de actividades industriales, comercial o generadas en la prestación de algún servicio; de igual manera los desechos líquidos producto de actividades industriales, los cuales deberán contar con el Permiso de Vertimiento respectivo, debe estar soportado por la auto declaración establecida en el Acuerdo 332 de 2008 *"Por medio del cual se establece la obligación de efectuar auto declaraciones de vertimientos líquidos de interés ambiental o de interés sanitario, a los usuarios del recurso hídrico servicio público domiciliario de alcantarillado dentro del territorio de Bogotá D. C."*.

---

<sup>14</sup> Informe de Auditoría Gubernamental – Modalidad Especial a la "Gestión de la SDA frente al control y seguimiento en materia de vertimientos del periodo de 2008 a marzo de 2013" Secretaría Distrital de Ambiente – SDA, PAD - 2013

**Gráfica 3**  
**Estrategia de control de vertimientos para el Río Bogotá**

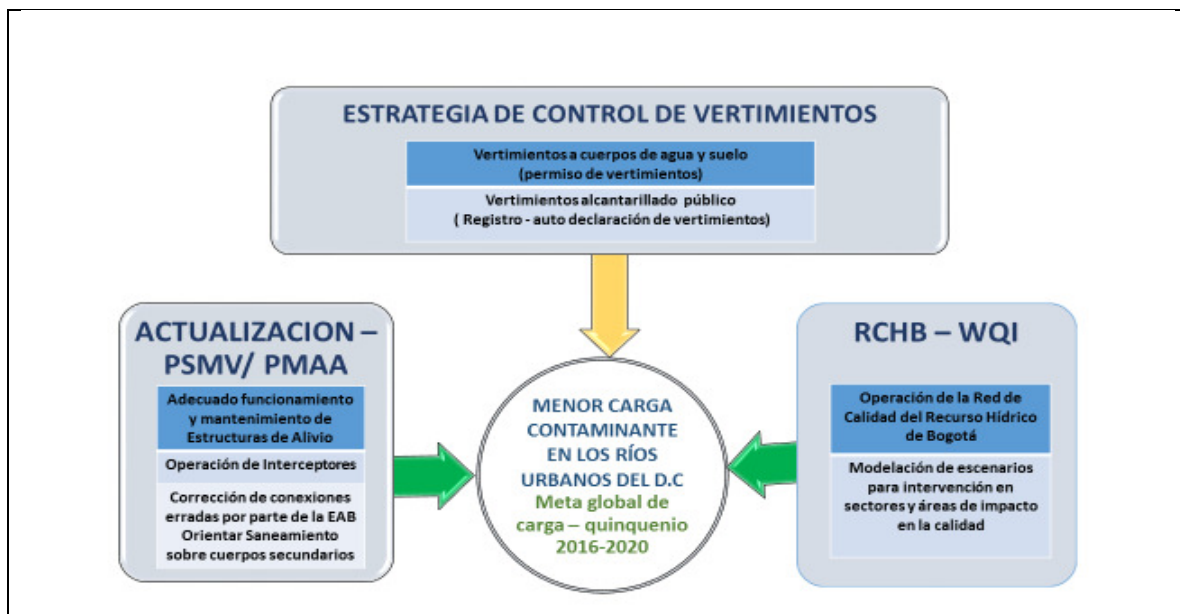

Fuente: SDA Subdirección de Recurso Hídrico

En la Resolución 5731 de 2008 de la SDA, “Por la cual se deroga la Resolución 1813 de 2006 y se adoptan nuevos objetivos de calidad para los Ríos Salitre, Fucha, Tunjuelo y el Canal Torca en el Distrito Capital”, se adoptó el documento “concentraciones de referencia para los vertimientos industriales realizados a la red de alcantarillado y de los vertimientos industriales y domésticos efectuados a cuerpos de agua de la ciudad de Bogotá - Informe Objetivos de Calidad”, el cual establece la calidad de los Ríos Salitre, Fucha y Tunjuelo y del Canal Torca, dentro del perímetro urbano de Bogotá.

Según el Observatorio Ambiental de Bogotá, de la SDA, la carga de materia orgánica DBO -Demanda Biológica de Oxígeno- aportada al Río Bogotá es la presentada en el cuadro 3.

**Cuadro 3**  
**Aporte de DBO al Río Bogotá por los Afluentes (ton/año)**

| Vigencia | Carga DBO para el Río Salitre - CDBOrs | Carga DBO para el Río Tunjuelo - CDBOrt | Carga DBO para el Río Fucha - CDBOrf | Carga DBO para el Canal Torca - CDBOct | DBO Aportada al Río Bogotá CDBO (ton/año) |
|----------|----------------------------------------|-----------------------------------------|--------------------------------------|----------------------------------------|-------------------------------------------|
| 2008     | 2.710                                  | 4.987                                   | 41.517                               |                                        | 49.215                                    |
| 2009     | 6.398,70                               | 20.978                                  | 34.960                               |                                        | 62.336,70                                 |
| 2010     | 9.333,50                               | 42.428,50                               | 41.858                               | 233                                    | 93.853                                    |
| 2011     | 11.146,50                              | 21.985,50                               | 42.235                               | 184,30                                 | 75.551,30                                 |
| 2012     | 5.719                                  | 28.566                                  | 35.633                               | 141                                    | 70.059                                    |
| 2013     | 9.600                                  | 29.045                                  | 36.855                               | 190                                    | 75.690                                    |

Fuente: Observatorio Ambiental de Bogotá SDA

El aporte de DBO promedio anual de los últimos 6 años fue de 71.117,5 t/año, siendo el aporte de los efluentes Río Salitre, Río Tunjuelo, Río Fucha y Canal Torca de 7.484,62; 24.665,00; 38.843,00 y 187,08 t/año respectivamente.

Para las últimas 5 vigencias, se estableció como meta de mejoramiento de calidad del agua para los ríos Tunjuelo, Fucha, Salitre y Torca, una longitud total de 103.14 km, no obstante, se ha mejorado la calidad de éstos en un promedio de 8.9 km<sup>15</sup>, correspondiente al 8.6% del recorrido de estos cuerpos de agua, como se muestra en el cuadro 4.

**Cuadro 4**  
**Kilómetros de Río con Calidad Mejorada para los Ríos Torca, Salitre, Fucha y Tunjuelo**

| Vigencia | Km mejorados |
|----------|--------------|
| 2009     | 7.30         |
| 2010     | 7.30         |
| 2011     | 11.37        |
| 2012     | 7.30         |
| 2013     | 11.40        |

Fuente: Observatorio Ambiental de Bogotá SDA

Este organismo de control, considera que este mejoramiento en la calidad hídrica, es muy bajo, toda vez que el contenido de DBO aportado por estos efluentes al Río Bogotá, incrementa sustancialmente el deterioro del mismo.

#### 4.1.3.2 Empresa de Acueducto, Alcantarillado y Aseo de Bogotá –EAB - ESP

La EAB viene ejecutando el macroproyecto 54 "Acciones para el Saneamiento del Río Bogotá", inscrito en los Planes de Desarrollo Bogotá Positiva y Bogotá Humana, cuyos componentes son: 1. Obras, equipos y suministros, que incluyen la construcción de la obra civil de los 82 kilómetros del interceptor Tunjuelo-Canoas para el saneamiento del río y 2. Estudios, Asesorías, Consultorías y Diseños, Interventorías, Servidumbres y Terrenos, los cuales comprenden actividades complementarias para alcanzar este fin.

Las actividades a desarrollar en la cuenca media, correspondiente al Distrito Capital, tienen como finalidad inicialmente y a corto plazo, generar espacios de esparcimiento para la ciudadanía, efectuando un mejoramiento estético de la zona de manejo y preservación ambiental –ZMPA- y a largo plazo, lograr que mediante los tratamientos efectuados en las PTAR, se le pueda dar un uso agrícola a las aguas tratadas en la planta, y en un futuro lograr la presencia de organismos vivos en este cuerpo de agua.

<sup>15</sup> SDA Observatorio Ambiental de Bogotá.

Mediante la firma del Convenio Interadministrativo 171 de 2007, entre la CAR y el Distrito Capital, este último representado por la SDA y la EAB – ESP, se determinó por un lado, que los recursos económicos necesarios, para el saneamiento del Río Bogotá corresponden al 50% del 15% recaudado del impuesto predial, lo que representa el 7.5% del mismo, y que dichas inversiones serán utilizadas tanto en la ampliación y optimización de la PTAR El Salitre como en la adecuación hidráulica del Río Bogotá, y por otro lado se le reconoce a la CAR autonomía administrativa, técnica y financiera.

La EAB – ESP en el marco de este convenio, debe ejecutar las inversiones en las siguientes actividades:

Obras complementarias y obras para el manejo de caudales en la cuenca del Salitre.

Interceptor Engativá – Cortijo.

Interceptor Fucha – Tunjuelo.

Interceptor Tunjuelo – Canoas.

Estación elevadora del Tunjuelo - Canoas.

Operación y mantenimiento de la planta de tratamiento de aguas residuales PTAR Canoas.

Las acciones para el saneamiento del río, están constituidas por una parte en la construcción de obra civil y por otra en la ejecución de actividades complementarias que incluyen estudios de asesorías, diseños, interventorías, servidumbres, terrenos y gastos generales.

## **4.2 AVANCES EN EL PROGRAMA DE SANEAMIENTO DEL RÍO BOGOTÁ**

La Contraloría de Bogotá realiza un seguimiento a las actividades que en cumplimiento de la Constitución Política, en el Artículo 79 reza: *"Todas las personas tienen derecho a gozar de un ambiente sano. La ley garantizará la participación de la comunidad en las decisiones que puedan afectarlo. Es deber del Estado proteger la diversidad e integridad del ambiente, conservar las áreas de especial importancia ecológica y fomentar la educación para el logro de estos fines"*, toda vez que el Río Bogotá es la arteria hídrica del Distrito y su proceso de descontaminación data desde el año 1994, con la firma del contrato de construcción de la PTAR Salitre, indicado anteriormente.

Resultado del seguimiento realizado por la Contraloría de Bogotá D.C., a los avances de las actividades del programa se tiene que:

Las inversiones correspondientes a humedales, adecuación hidráulica, zonas de ronda y manejo ambiental, está a cargo de la CAR e incluye el aspecto paisajístico de la ronda del río, con el fin de adecuar espacios de esparcimiento y recreación para los ciudadanos.

La ampliación de la estación elevadora Salitre y de la PTAR Salitre, de acuerdo al Convenio 171 está a cargo de la CAR y su diseño de detalle así como la construcción de la segunda fase de la PTAR, correspondiente al tratamiento químicamente asistido, está en proceso licitatorio.

Los interceptores Engativá–Cortijo y Fucha–Tunjuelo actualmente en operación; y el Tunjuelo–Canoas se encuentra en un 95% de construcción. Las inversiones realizadas en los interceptores son recursos de la EAB no incluidos en la tarifa. La estación elevadora Tunjuelo-Canoas, fue eliminada del esquema de inversiones, por razones técnicas.

Para la construcción de la estación elevadora Canoas se encuentran firmados, los Convenios Interadministrativo No. 9-07-25500-0869-2011 Interinstitucional No. 9-07-10200-0688-2011, los cuales garantizan la obra respectiva. Con relación a la construcción de la PTAR Canoas, se encuentra en desarrollo el contrato 1-02-25500-0690-2011, cuyo objeto es la elaboración del diseño de detalle y cuyo avance es del 41%.

De otra parte, desde el año 2005, la EAB, EEB y EMGESA han invertido recursos por valor de \$6.856 millones en la recuperación ambiental del Muña.

## 5. INVERSIONES RELACIONADAS CON LOS COMPONENTES DEL PROGRAMA DE SANEAMIENTO DEL RÍO BOGOTÁ

Durante el período en estudio, los recursos invertidos en la descontaminación del río Bogotá provinieron del Presupuesto Anual Distrital, de la Empresa de Acueducto y Alcantarillado de Bogotá - EAB, de la CAR (fondo FIAB) y de la Nación. Los recursos que aportó el Distrito (Secretaría Distrital de Ambiente – SDA y EAB) se ejecutaron (comprometieron y giraron) en los planes de desarrollo respectivos (Bogotá sin Indiferencia: 2008; Bogotá Positiva: 2008-2012; y Bogotá Humana: 2012-2016).

Cronológicamente los recursos, en cada plan de desarrollo, se apropiaron en los siguientes programas: *Sostenibilidad Urbano Regional, Mejoremos el Barrio, Ambiente Vital, Río Bogotá, Transformación Urbana Positiva, Vivienda y Hábitat Humanos, y Recuperación, Rehabilitación y Restauración de la Estructura Ecológica Principal y de los Espacios del Agua*. De estos programas, se tomaron y cuantificaron los proyectos relacionados con los cinco componentes básicos de la denominada, en el estudio, "Política de descontaminación del río Bogotá".

Como se muestra en el Anexo, lo aforado en el Presupuesto General del Distrito, durante las vigencias 2008 – 2013, para la descontaminación del río Bogotá y sus actividades relacionadas ascendió a \$2.2 billones constantes (pesos de 2008). No obstante, lo ejecutado (comprometido y girado en cada vigencia) alcanzó, en promedio anual, el 83% (\$1.8 billones)<sup>16</sup>.

En las dos últimas vigencias (2012-2013), los recursos aforados, para el propósito de descontaminación del río y actividades conexas, disminuyeron en términos reales; por supuesto, igual sucedió con lo ejecutado y más aun con lo girado. En efecto, de aforos promedio superiores a \$440 mil millones, en las cuatro vigencias anteriores, se pasó a un promedio de \$208 mil millones, en las dos últimas.

La mayor cantidad de recursos aforados e invertidos de manera directa, durante el período de este estudio, se aplicó en desarrollo del programa Ambiente Vital<sup>17</sup> (\$740.536 millones reales promedio), por medio del cual se adelantaron proyectos encaminados al manejo de ecosistemas, planeación y gestión ambiental, control a

<sup>16</sup> En realidad, lo efectivamente ejecutado en cada vigencia (giros), no alcanzó el 50% de lo presupuestado (\$0.91 billones), en promedio de promedios anuales.

<sup>17</sup> Estructurado en el plan de desarrollo Bogotá Positiva (2008-2012).

factores que impactan el ambiente, adecuación de humedales, y los ejecutados por la EAB, en el sistema de alcantarillado.

Esta última (EAB), efectuó el mayor gasto de inversión, durante el período, a través de intervenciones en: Sistema de Alcantarillado Pluvial, Sistema de Alcantarillado Sanitario y Alcantarillado combinado, por más de \$1.6 billones reales.

Durante el período de este estudio, se programó invertir cerca de medio billón de pesos constantes (\$453.124 millones), en acciones directas para el saneamiento del Río Bogotá; de éstos, sólo se ejecutó en promedio el 42%. Los demás recursos se programaron en los otros componentes básicos de la “Política de descontaminación del río Bogotá”; de hecho, para la *Adecuación de humedales* y otras actividades relacionadas se programaron \$72.255 millones, de los cuales se ejecutó en promedio el 84.7%.

En particular, los recursos invertidos por la EAB directamente en el saneamiento del río Bogotá se orientaron, fundamentalmente, a la construcción de 7.18 kilómetros de interceptores para el saneamiento del río y en actividades complementarias con el mismo propósito; según lo reportado por el SEGPLAN<sup>18</sup>, a 31 de mayo de 2012, se construyeron 7.91 km de interceptores (110.2% de lo programado)<sup>19</sup>, y las actividades complementarias programadas en cada vigencia se ejecutaron en el 67% promedio.

Además de lo apropiado y ejecutado directamente con recursos de Bogotá, la ciudad aporta al saneamiento del río de manera indirecta, con los recursos provenientes del Impuesto Predial que la Administración Central (Tesorería Distrital) le gira a la CAR<sup>20</sup>, los cuales son administrados por el Fondo para las Inversiones Ambientales de Bogotá – FIAB.

El valor girado, a la *autoridad ambiental* – CAR, con destino a la protección del medio ambiente y los recursos naturales renovables, corresponde al 15% (límite inferior de lo que por norma está establecido entre el 15% y el 25.9%). Es decir que para el Programa de Saneamiento del Río Bogotá, del 15% del recaudo del Predial se destina el 7.5%, lo que corresponde al 50% de ese valor.

<sup>18</sup> Sistema de Seguimiento al Plan de Desarrollo; Secretaría Distrital de Planeación - SDP

<sup>19</sup> La construcción del interceptor Tunjuelo-Canoas finalizó en la fecha señalada.

<sup>20</sup> Ver Ley 99 de 1993, Artículo 44, Modificado por el art. 110, Ley 1151 de 2007, sobre “Porcentaje Ambiental de los Gravámenes a la propiedad Inmueble”; Acuerdo 14 de 1996, fijación del porcentaje ambiental del D.C.; y los Acuerdos 028 de 2005 y 015 de 2007, de la CAR, por los cuales se crea y modifica el FIAB.

En ese orden de ideas, al fondo CAR-FIAB, durante el período de estudio, se le giró el 7.5% de los recursos recaudados por Predial en cada vigencia, tal como se muestra en el siguiente cuadro:

**Cuadro 5**  
Predial, recursos reales para protección del ambiente

(Millones de pesos constantes)

| Año          | Valor Predial transferido 15% | Valor girado a CAR-FIAB 7.5% |
|--------------|-------------------------------|------------------------------|
| 2008         | 114.856,79                    | 57.428,40                    |
| 2009         | 131.117,50                    | 65.558,73                    |
| 2010         | 141.688,03                    | 70.844.01                    |
| 2011         | 166.617.63                    | 83.308.81                    |
| 2012         | 185.386.55                    | 92.693.27                    |
| 2013         | 218.491.44                    | 109.245.71                   |
| <b>Total</b> | <b>958.157.94</b>             | <b>479.078.93</b>            |

Fuente: Informe sobre el Estado de los Recursos Naturales y Del Ambiente de Bogotá D.C., Contraloría de Bogotá Octubre de 2014, y cálculos propios.

Como se observa, durante el período de estudio 2008 al 2013, Bogotá le giró a la CAR-FIAB cerca de medio billón de pesos reales para que fueran invertidos en proyectos de recuperación del río Bogotá. En efecto, en respuesta a requerimiento de esta contraloría<sup>21</sup>, la CAR manifestó que desde el año 2009 se inició la ejecución de recursos en el proyecto "Adecuación hidráulica y recuperación ambiental del río Bogotá", en el cual se han comprometido, a mayo de 2014, \$438.811 millones de pesos corrientes y se han efectuado pagos por \$150.621 millones.

En consecuencia, los recursos asignados por Bogotá, en forma directa (Anexo) e indirecta (CAR-FIAB), para el saneamiento del río Bogotá (en los cinco componentes considerados en este estudio), desde el 2008 al 2013, suman cerca de \$2.7 billones constantes, los cuales, como ha sido reiterado en estudios anteriores, no han dado los resultados esperados conforme a las metas formuladas en el corto y mediano plazo, en relación a mejorar la calidad del agua del río Bogotá.

Al tenor de los continuos fracasos de la implementación de los componentes del programa de saneamiento del río y en respuesta a la ineficacia histórica de las

<sup>21</sup> Mediante Oficio CAR 2-2014-11346.

acciones ejecutadas para su saneamiento (dispersión de recursos), el Consejo de Estado, como respuesta a una acción popular amparada en los derechos colectivos y a un ambiente sano (Sentencia del 28 de marzo de 2014), perentoriamente determinó, entre otros aspectos, *la integración de recursos interinstitucionales para desarrollar una estrategia intersectorial y económica en beneficio del río*. De hecho, se ordena "...de forma inmediata al gobierno nacional un estudio sobre la efectividad de impuestos, tasas, contribuciones, y demás gravámenes existentes para la protección del ambiente..."; de igual manera, se ordena "...en nueve meses modificar los parámetros de los instrumentos económicos: tasas retributivas, compensatorias y de utilización de aguas...", además de la ampliación de la educación y participación de los ciudadanos.

La estrategia interinstitucional implica un monto de inversiones (y una gerencia encargada de ello), cercanas a los seis (6) billones de pesos (\$5.54 billones de 2010), provenientes de tres fuentes básicas: i) Plan Departamental de Aguas-PDA, ii) la CAR, y iii) el Fondo Nacional de Regalías-FNR; el primero recoge recursos del Gobierno Nacional, el Sistema General de Participaciones-SGP, de los municipios y de la gobernación. Las inversiones están orientadas a: i) el saneamiento de vertimientos en 41 municipios (\$0.69 billones), ii) el saneamiento de los vertimientos del D.C. (\$4.83 billones), y iii) la mitigación de la problemática del Muña (\$0.02 billones).

## CONCLUSIONES

Revisado todo lo anterior, no cabe duda que la descontaminación del Río Bogotá continúa siendo un pendiente para la ciudad, desde dos perspectivas:

- Desde lo ambiental, pues su nivel creciente de contaminación priva a los bogotanos del disfrute de ese bien natural y de sus servicios ambientales, y afecta el bienestar y la vida de los habitantes;
- Desde lo económico y social, dado que los recursos invertidos (gastados?) desde el año 1994 se han diluido aguas abajo de la PTAR El Salitre.

La estimación económica de las externalidades negativas derivadas de la contaminación del río Bogotá, con base en el estudio de la CEPAL (2010), evidencia que alrededor de \$135,02 billones anuales tendrían que ser destinados por la ciudad, con el único propósito de compensar los efectos negativos que la misma deriva. Ese valor corresponde al dinero que pierden los bogotanos por el daño sobre los bienes y servicios naturales potenciales que ofrecería el río descontaminado, ya que en una economía de mercado, el río descontaminado aumenta la actividad productiva (agro-industria), amplía el turístico (industria sin chimeneas) y posibilita la generación de empleos e ingresos.

Como lo estableció la Contraloría de Bogotá en el Informe Anual sobre el Estado de los Recursos Naturales y del Ambiente de Bogotá D.C., Vigencia 2013, las estrategias ejecutadas para la recuperación del Río Bogotá, se han concebido bajo las denominadas "soluciones de final de tubo", lo cual no sólo ha generado grandes e infructuosas inversiones por parte de la nación y del Distrito Capital, sino grandes esfuerzos individuales de las entidades involucradas cuya descoordinación ha imposibilitado el logro de los objetivos y metas de calidad del agua del río.

Los resultados obtenidos, al margen de los recursos programados (\$2.2 billones reales) y ejecutados (83% promedio), indican que la ciudad se encuentra frente a una gestión ineficiente, ineficaz e inefectiva, de las administraciones de la ciudad que han gobernado durante el período comprendido entre los años 1998 y 2013.

La presión creciente en las condiciones naturales de la cuenca, conllevan a pensar que día a día se requerirán no sólo mas recursos económicos sino ingentes esfuerzos humanos y tecnológicos para tratar de acometer la solución de un problema que tiene características irreversibles de solución en el mediano plazo.

Las características actuales de contaminación del río Bogotá, evidencian que la principal arteria hídrica de la ciudad, se encuentra en un estado de insostenibilidad ambiental, social y económica.

De seguirse concibiendo con mayor énfasis, dentro del saneamiento del río Bogotá, la construcción de Plantas de Tratamiento de Aguas Residuales PTAR, desconociéndose los programas de educación y conscientización ciudadana, en torno a crear la cultura de ahorro y uso eficiente del agua, proporcionalmente al crecimiento de la ciudad, se necesitarán megaplantas para el tratamiento de las aguas negras que se generan de las actividades propias del desarrollo. De hecho, no es exagerado afirmar que la PTAR El Salitre constituye uno de los proyectos más onerosos de la ciudad, por lo menos en los últimos quince años.

Una verdadera política para el manejo integral del río Bogotá, obliga a que todos los actores del programa de descontaminación hídrica de dicho río garanticen la continuidad, coherencia, concordancia y ejecución ordenada y secuencial del mismo; de no ser así, se seguirá causando un daño al patrimonio distrital (incluido el económico y natural).

## REFERENCIAS

Stiglitz, Joseph E. (2012. 19 Agosto). De la maldición a la bendición de los recursos naturales. El Espectador, Opinión.

Jacobs, Michael (1996), la economía verde, Barcelona: Icaria.

Naredo, José M. (1987), La economía en evolución. Historia y perspectivas de las categorías básicas del pensamiento económico, Madrid: Siglo XXI.

Dragan J.C. y Demetrescu, M.C. (1991). Entropy and bioeconomics. The new paradigm of Nicholas Georgescu-Roegen, Roma: Nagard.

Martínez Alier, Joan y Schlüpmann, Klaus (1991). La ecología y la economía, México D.F.: Fondo de Cultura Económica.

Economía Ecológica; octubre 2014, [http:// Wikipedia.com](http://Wikipedia.com)

[www.antioquia.gov.co/antioquia1/organismos/planeacion/descargas/banco\\_proyectos/libro/12\\_fuentes\\_financiacion.pdf](http://www.antioquia.gov.co/antioquia1/organismos/planeacion/descargas/banco_proyectos/libro/12_fuentes_financiacion.pdf); 24/09/2014

[www.procuraduria.gov.co](http://www.procuraduria.gov.co) 11.11.2014

<http://portal.dafp.gov.co/> 11.11.2014.

Alcaldía Mayor de Bogotá; Acuerdo 308 del 9 de julio de 2008, Plan de Desarrollo Económico, Social, Ambiental y de Obras Públicas para Bogotá D.C., 2008 – 2012, Bogotá Positiva: Para Vivir Mejor.

Alcaldía Mayor de Bogotá; Acuerdo 119 del 3 de junio de 2004, Plan de Desarrollo Económico, Social, Ambiental y de Obras Públicas para Bogotá D.C., 2004 – 2008, Bogotá sin Indiferencia.

Alcaldía Mayor de Bogotá; Acuerdo 489 del 12 de junio de 2012, Plan de Desarrollo Económico, Social, Ambiental y de Obras Públicas para Bogotá D.C., 2012 – 2016, Bogotá Humana.

Max-Neef, Manfred (1996), Desarrollo a Escala Humana: una opción para el futuro, CEPUR, Proyecto 20 Editores.

Sen, Amartya (2006), Desarrollo y Libertad; Editorial Planeta, octava edición, Colombia.

Plan Maestro de Alcantarillado 1985. Black & Veatch - Hidroestudios: 16 alternativas de tratamiento analizadas. Planta única y gran interceptor del río Bogotá.

Estudio de Epam Ltda, 1993: 3 alternativas analizadas. Esquema de tres plantas (Salitre, Fucha y Tunjuelo).

Informe Anual del Estado de los Recursos Naturales y del ambiente en Bogotá D.C. 2000. Análisis costo-beneficio de la Planta de Tratamiento El Salitre. Contraloría de Bogotá, 2001.

Auditoría Gubernamental con Enfoque Integral Modalidad Especial, al Programa de Descontaminación del Río Bogotá – PDRB. Contraloría de Bogotá, 2003.

Auditoría Gubernamental con Enfoque Integral Modalidad Regular al Departamento Técnico Administrativo del Medio Ambiente – DAMA. Contraloría de Bogotá, 2005.

Auditoría Gubernamental con Enfoque Integral, Modalidad Especial a la Contratación suscrita por el Departamento Técnico Administrativo del Medio Ambiente – DAMA. Contraloría de Bogotá, 2006.

Auditoría Gubernamental con enfoque integral modalidad regular al DAMA. Contraloría de Bogotá, 2007.

<http://oab.ambientebogota.gov.co/> Datos e indicadores para medir la calidad del ambiente en Bogotá. Recurso agua. Noviembre 2014.

Propuesta de Política para la descontaminación del río Bogotá. Cartagena de Indias, 27 de Agosto de 2010. Naciones Unidas. CEPAL.

ADECUACION HIDRÁULICA Y RECUPERACIÓN AMBIENTAL DEL RÍO BOGOTÁ, Bogotá D.C., CAR, Diciembre de 2012.

ANEXO- INVERSIÓN DIRECTA "PROGRAMA DESCONTAMINACIÓN RÍO BOGOTÁ" (millones de pesos de 2008)

| AÑOS                                                                                                                | 2008              |              |              | 2009              |              |              | 2010              |               |              | 2011              |              |              | 2012              |               |              | 2013              |              |              | TOTAL            |            |           |
|---------------------------------------------------------------------------------------------------------------------|-------------------|--------------|--------------|-------------------|--------------|--------------|-------------------|---------------|--------------|-------------------|--------------|--------------|-------------------|---------------|--------------|-------------------|--------------|--------------|------------------|------------|-----------|
| PLAN DE DESARROLLO                                                                                                  | Presupuesto       | %ejec.       | %giros       | Presupuesto       | %ejec.       | %giros       | Presupuesto       | %ejec.        | %giros       | Presupuesto       | %ejec.       | %giros       | Presupuesto       | %ejec.        | %giros       | Presupuesto       | %ejec.       | %giros       | Ppto.*           | %ej        | %gir      |
| <b>BOGOTÁ SIN INDIFFERENCIA (2004-2008)</b>                                                                         |                   |              |              |                   |              |              |                   |               |              |                   |              |              |                   |               |              |                   |              |              |                  |            |           |
| <b>Sostenibilidad urbano-regional</b>                                                                               | <b>287.464,20</b> | <b>99,75</b> | <b>72,93</b> |                   |              |              |                   |               |              |                   |              |              |                   |               |              |                   |              |              | <b>287.464</b>   | <b>100</b> | <b>73</b> |
| Monitoreo de la calidad del ambiente                                                                                | 1.118,10          | 98,40        | 77,40        |                   |              |              |                   |               |              |                   |              |              |                   |               |              |                   |              |              | 1.118            | 98         | 77        |
| Construcción sist. troncal, pluvial                                                                                 | 44.850,30         | 100,00       | 54,60        |                   |              |              |                   |               |              |                   |              |              |                   |               |              |                   |              |              | 44.850           | 100        | 55        |
| Construcción sist. Troncal, sanitario                                                                               | 222.588,50        | 100,00       | 52,20        |                   |              |              |                   |               |              |                   |              |              |                   |               |              |                   |              |              | 222.589          | 100        | 52        |
| Protección y manejo de ecosistemas estra.                                                                           | 2.946,40          | 99,60        | 90,90        |                   |              |              |                   |               |              |                   |              |              |                   |               |              |                   |              |              | 2.946            | 100        | 91        |
| Adecuación de humedales, protección y ...                                                                           | 592,40            | 100,00       | 98,90        |                   |              |              |                   |               |              |                   |              |              |                   |               |              |                   |              |              | 592              | 100        | 99        |
| Constucción de redes locales, pluvial                                                                               | 10.759,10         | 100,00       | 100,00       |                   |              |              |                   |               |              |                   |              |              |                   |               |              |                   |              |              | 10.759           | 100        | 100       |
| Construcción de redes locales, sanitario                                                                            | 141,10            | 100,00       | 100,00       |                   |              |              |                   |               |              |                   |              |              |                   |               |              |                   |              |              | 141              | 100        | 100       |
| Rehabilitación Sist. Alcantarillado S y P                                                                           | 4.468,30          | 100,00       | 9,40         |                   |              |              |                   |               |              |                   |              |              |                   |               |              |                   |              |              | 4.468            | 100        | 9         |
| <b>BOGOTÁ POSITIVA (2008-2012)</b>                                                                                  |                   |              |              |                   |              |              |                   |               |              |                   |              |              |                   |               |              |                   |              |              |                  |            |           |
| <b>Mejoremos el barrio</b>                                                                                          | <b>63.433,00</b>  | <b>86,40</b> | <b>39,68</b> | <b>98.884,02</b>  | <b>88,98</b> | <b>49,62</b> | <b>95.608,57</b>  | <b>92,44</b>  | <b>33,92</b> | <b>132.730,12</b> | <b>90,58</b> | <b>43,94</b> | <b>39.716,51</b>  | <b>100,00</b> | <b>25,44</b> |                   |              |              | <b>430.372</b>   | <b>92</b>  | <b>39</b> |
| Constucción redes locales alcant. Pluvial                                                                           | 25.331,50         | 88,50        | 21,10        | 37.528,24         | 87,00        | 59,40        | 41.030,12         | 88,50         | 23,10        | 43.651,25         | 86,40        | 15,40        | 11.099,62         | 100,00        | 15,70        |                   |              |              | 158.641          | 90         | 27        |
| Construcción redes locales alcant. Sanitario                                                                        | 14.506,70         | 61,50        | 22,10        | 17.922,06         | 65,50        | 22,00        | 16.594,98         | 75,20         | 23,80        | 28.753,48         | 79,90        | 16,00        | 8.351,90          | 100,00        | 22,60        |                   |              |              | 86.129           | 76         | 21        |
| Renovación, rehabil. Alcantarillado sanitario                                                                       | 19.200,00         | 85,60        | 64,00        | 27.263,04         | 98,20        | 58,00        | 26.714,82         | 99,70         | 29,80        | 36.646,21         | 94,30        | 75,00        | 7.284,30          | 100,00        | 35,70        |                   |              |              | 117.108          | 96         | 53        |
| Renovación, rehabil. Alcantarillado pluvial                                                                         | 3.387,80          | 96,40        | 73,90        | 12.117,35         | 94,40        | 61,30        | 8.359,12          | 100,00        | 54,70        | 18.078,97         | 92,30        | 60,50        | 10.149,53         | 100,00        | 39,80        |                   |              |              | 52.093           | 97         | 58        |
| Renovación, rehab. Alcantarillado combinado                                                                         | 1.007,00          | 100,00       | 17,30        | 4.053,33          | 99,80        | 47,40        | 2.909,53          | 98,80         | 38,20        | 5.600,22          | 100,00       | 52,80        | 2.831,16          | 100,00        | 13,40        |                   |              |              | 16.401           | 100        | 34        |
| <b>Ambiente vital</b>                                                                                               | <b>73.733,50</b>  | <b>88,86</b> | <b>39,74</b> | <b>273.825,00</b> | <b>92,60</b> | <b>62,13</b> | <b>161.024,61</b> | <b>97,56</b>  | <b>70,09</b> | <b>193.956,49</b> | <b>85,20</b> | <b>37,30</b> | <b>37.996,24</b>  | <b>99,93</b>  | <b>60,23</b> |                   |              |              | <b>740.536</b>   | <b>93</b>  | <b>54</b> |
| Manejo de ecosistemas y áreas protegidas                                                                            | 1.007,00          | 99,70        | 40,50        | 5.886,08          | 99,70        | 89,20        | 599,45            | 95,00         | 71,80        | 5.906,10          | 71,70        | 54,40        | 2.280,90          | 99,70         | 92,60        |                   |              |              | 15.680           | 93         | 70        |
| Gestión ambiental para el desarrollo sost.                                                                          | 834,50            | 99,40        | 90,20        | 2.163,82          | 97,00        | 68,20        | 605,44            | 99,70         | 89,00        | 1.225,82          | 82,20        | 36,00        | 330,71            | 100,00        | 90,50        |                   |              |              | 5.160            | 96         | 75        |
| Planeación y gestión ambiental en el D.C.                                                                           | 1.142,30          | 98,60        | 66,20        | 2.821,67          | 99,00        | 65,50        | 914,66            | 96,40         | 94,40        | 1.644,92          | 95,60        | 50,60        | 815,86            | 99,90         | 91,00        |                   |              |              | 7.339            | 98         | 74        |
| Control factores que impactan ambiente.                                                                             | 1.400,00          | 99,50        | 66,60        | 7.731,37          | 98,50        | 53,90        | 3.344,58          | 98,90         | 97,40        | 6.080,98          | 96,50        | 30,60        | 2.409,50          | 99,90         | 87,30        |                   |              |              | 20.966           | 99         | 67        |
| Construcción sistema alcantarillado sanita.                                                                         | 21.300,10         | 78,00        | 3,00         | 135.947,84        | 96,30        | 74,60        | 63.616,55         | 99,20         | 46,50        | 32.669,75         | 77,50        | 37,50        | 16.367,91         | 100,00        | 6,90         |                   |              |              | 269.902          | 90         | 34        |
| Construcción sistema alcantarillado pluvial                                                                         | 35.030,50         | 70,40        | 4,90         | 109.559,41        | 93,90        | 52,80        | 89.029,65         | 99,00         | 32,70        | 140.018,60        | 94,30        | 31,30        | 13.844,57         | 100,00        | 47,90        |                   |              |              | 387.483          | 92         | 34        |
| Adecuación humedales, prot. y manejo amb                                                                            | 13.019,10         | 76,40        | 6,80         | 9.714,80          | 63,80        | 30,70        | 2.914,28          | 94,70         | 58,80        | 6.410,32          | 78,60        | 20,70        | 1.946,79          | 100,00        | 5,40         |                   |              |              | 34.005           | 83         | 24        |
| <b>Río Bogotá</b>                                                                                                   | <b>29.157,70</b>  | <b>2,90</b>  | <b>0,00</b>  | <b>80.684,71</b>  | <b>59,00</b> | <b>50,50</b> | <b>79.004,85</b>  | <b>97,50</b>  | <b>44,00</b> | <b>163.313,48</b> | <b>99,40</b> | <b>31,60</b> | <b>24.157,49</b>  | <b>100,00</b> | <b>19,20</b> |                   |              |              | <b>376.318</b>   | <b>72</b>  | <b>29</b> |
| Acciones para el saneamiento del río                                                                                | 29.157,70         | 2,90         | 0,00         | 80.684,71         | 59,00        | 50,50        | 79.004,85         | 97,50         | 44,00        | 163.313,48        | 99,40        | 31,60        | 24.157,49         | 100,00        | 19,20        |                   |              |              | 376.318          | 72         | 29        |
| <b>Transformación Urbana Positiva</b>                                                                               | <b>3.145,50</b>   | <b>57,30</b> | <b>10,05</b> | <b>11.359,71</b>  | <b>81,43</b> | <b>30,00</b> | <b>43.491,87</b>  | <b>100,00</b> | <b>73,67</b> | <b>0,00</b>       | <b>0,00</b>  | <b>0,00</b>  | <b>2.831,16</b>   | <b>100,00</b> | <b>13,40</b> |                   |              |              | <b>60.828</b>    | <b>85</b>  | <b>32</b> |
| Renovación, rehabil. Alcantarillado pluvial                                                                         | 482,40            | 94,20        | 20,10        | 5.203,63          | 88,80        | 53,80        | 12.347,81         | 100,00        | 78,60        | 0,00              | 0,00         | 0,00         | 0,00              | 0,00          | 0,00         |                   |              |              | 18.034           | 94         | 51        |
| Renovación, rehabil. Alcantarillado sanitario                                                                       | 0,00              | 0,00         | 0,00         | 766,67            | 56,50        | 0,00         | 22.445,50         | 100,00        | 99,10        | 0,00              | 0,00         | 0,00         | 0,00              | 0,00          | 0,00         |                   |              |              | 23.212           | 78         | 50        |
| Renovación, rehabil. Alcantarillado combina.                                                                        | 2.663,10          | 20,40        | 0,00         | 5.389,41          | 99,00        | 36,20        | 8.698,57          | 100,00        | 43,30        | 0,00              | 0,00         | 0,00         | 2.831,16          | 100,00        | 13,40        |                   |              |              | 19.582           | 80         | 23        |
| <b>BOGOTÁ HUMANA (2012-2016)</b>                                                                                    |                   |              |              |                   |              |              |                   |               |              |                   |              |              |                   |               |              |                   |              |              |                  |            |           |
| <b>Vivienda y hábitat humanos</b>                                                                                   |                   |              |              |                   |              |              |                   |               |              |                   |              |              | <b>53.791,81</b>  | <b>53,88</b>  | <b>14,82</b> | <b>127.917,80</b> | <b>86,14</b> | <b>45,32</b> | <b>181.710</b>   | <b>70</b>  | <b>30</b> |
| Construcción sistema alcantarillado sanita.                                                                         |                   |              |              |                   |              |              |                   |               |              |                   |              |              | 25.612,06         | 15,30         | 3,60         | 19.299,15         | 77,80        | 35,40        | 44.911           | 47         | 20        |
| Construcción sistema alcantarillado pluvial                                                                         |                   |              |              |                   |              |              |                   |               |              |                   |              |              | 16.088,80         | 96,50         | 30,50        | 35.090,45         | 93,30        | 53,00        | 51.179           | 95         | 42        |
| Renovación, rehabil. Alcantarillado sanitario                                                                       |                   |              |              |                   |              |              |                   |               |              |                   |              |              | 8.362,37          | 48,10         | 33,70        | 52.832,18         | 95,90        | 62,60        | 61.195           | 72         | 48        |
| Renovación, rehabil. Alcantarillado pluvial                                                                         |                   |              |              |                   |              |              |                   |               |              |                   |              |              | 2.115,19          | 59,10         | 4,20         | 17.192,21         | 64,80        | 17,00        | 19.307           | 62         | 11        |
| Renovación, rehab. Alcantarillado combinado                                                                         |                   |              |              |                   |              |              |                   |               |              |                   |              |              | 1.613,40          | 50,40         | 2,10         | 3.503,82          | 98,90        | 58,60        | 5.117            | 75         | 30        |
| <b>Recuperación, rehabilitación y restauración de la estructura ecológica principal y de los espacios del agua.</b> |                   |              |              |                   |              |              |                   |               |              |                   |              |              | <b>73.817,12</b>  | <b>66,10</b>  | <b>34,70</b> | <b>56.338,70</b>  | <b>76,04</b> | <b>32,10</b> | <b>130.156</b>   | <b>71</b>  | <b>33</b> |
| Acciones para el saneamiento del río Bogotá                                                                         |                   |              |              |                   |              |              |                   |               |              |                   |              |              | 63.296,01         | 16,70         | 14,50        | 13.509,69         | 7,40         | 6,90         | 76.806           | 12         | 11        |
| Participación ciudadana y edu. Ambiental                                                                            |                   |              |              |                   |              |              |                   |               |              |                   |              |              | 1.095,87          | 84,30         | 58,40        | 2.575,23          | 98,10        | 73,20        | 3.671            | 91         | 66        |
| Control amb. a recursos hídricos y del suelo                                                                        |                   |              |              |                   |              |              |                   |               |              |                   |              |              | 3.171,53          | 99,90         | 64,50        | 5.050,62          | 88,10        | 60,30        | 8.222            | 94         | 62        |
| Fortalecimiento de la gestión ambiental                                                                             |                   |              |              |                   |              |              |                   |               |              |                   |              |              | 3.097,57          | 76,30         | 31,50        | 701,47            | 97,30        | 20,00        | 3.799            | 87         | 26        |
| Adecuación de humedales, protección y ...                                                                           |                   |              |              |                   |              |              |                   |               |              |                   |              |              | 3.156,14          | 53,30         | 4,60         | 34.501,70         | 89,30        | 0,10         | 37.658           | 71         | 2         |
| <b>TOTAL</b>                                                                                                        | <b>456.933,90</b> | <b>67,04</b> | <b>32,48</b> | <b>464.753,43</b> | <b>80,50</b> | <b>48,06</b> | <b>379.129,91</b> | <b>96,87</b>  | <b>55,42</b> | <b>490.000,09</b> | <b>91,73</b> | <b>37,61</b> | <b>232.310,32</b> | <b>86,65</b>  | <b>27,96</b> | <b>184.256,50</b> | <b>81,09</b> | <b>38,71</b> | <b>2.207.384</b> | <b>83</b>  | <b>41</b> |

\* Presupuesto disponible; comprende el presupuesto vigente +/- las modificaciones presupuestales de la vigencia.
