# Supplementary material
Source: publisher figshare collection journal article supplement (https://tandf.figshare.com/articles/dataset/_/10732607)
Supplement: Supplementary file 1 [file 2 › fjds_a_1690134_sm1399.pdf]

CONSEJO DE ESTADO  
SALA DE LO CONTENCIOSO ADMINISTRATIVO  
SECCIÓN PRIMERA

Bogotá, veintiocho (28) de marzo de dos mil catorce  
(2014)

CONSEJERO PONENTE: DOCTOR MARCO ANTONIO VELILLA MORENO

Ref: Expediente núm. AP-25000-23-27-000-2001-90479-01

EXPS. ACUMULADOS: 54001-23-31-004-2000-0428  
54001-23-31-004-2001-0122  
54001-23-31-004-2001-0343

ACCIÓN POPULAR

RECURSOS DE APELACIÓN INTERPUESTOS CONTRA LAS  
PROVIDENCIAS DE 25 DE AGOSTO Y SU COMPLEMENTARIA DE 16 DE  
SEPTIEMBRE DE 2004 PROFERIDAS POR LA SECCIÓN CUARTA,  
SUBSECCIÓN "B", DEL TRIBUNAL ADMINISTRATIVO DE  
CUNDINAMARCA

ACTOR: GUSTAVO MOYA ÁNGEL Y OTROS

Procede la Sala a decidir la apelación interpuesta por  
las partes e intervinientes en la presente acción  
popular- ALFONSO PÉREZ PRECIADO, FABIO ROBERTO PÉREZ  
JAIMES, GUSTAVO MOYA ÁNGEL, SARA MARIELA PÁRRAGA, JORGE  
HUMBERTO GONZÁLEZ VILLANUEVA y JORGE ENRIQUE CUERVO  
RAMÍREZ; LOS MUNICIPIOS DE CHOCONTÁ, TOCANCIPÁ, MOSQUERA,  
SESQUILÉ, VILLAPINZÓN, CAJICÁ, COGUA, BOJACÁ, ZIPAQUIRÁ,  
ZIBATÉ, FUNZA, CUCUNUBÁ, GACHANCIPÁ, COTA, CHÍA, SOACHA,  
MADRID - EMPRESA DE ACUEDUCTO, ALCANTARILLADO Y ASEO DE  
MADRID E.A.A.M. E.S.P., LA MESA, TABIO, SUESCA, SOPÓ; LOS

Expediente No. 25000-23-27-000-2001-0479-01  
Acumulados Nos. 2000-0428, 2001-0122, 2001-0343  
Actor: GUSTAVO MOYA ÁNGEL Y OTROS  
Acción Popular

MINISTERIOS DE EDUCACIÓN NACIONAL, DE AGRICULTURA Y DESARROLLO RURAL, DE AMBIENTE, VIVIENDA Y DESARROLLO TERRITORIAL, DE COMERCIO, INDUSTRIA Y TURISMO, DE HACIENDA Y CRÉDITO PÚBLICO Y DE MINAS Y ENERGÍA; EL FONDO NACIONAL DE REGALÍAS, LA ALCALDÍA MAYOR DE BOGOTÁ D.C. - DEPARTAMENTO TÉCNICO ADMINISTRATIVO DEL MEDIO AMBIENTE - DAMA-, EL DEPARTAMENTO NACIONAL DE PLANEACIÓN, LA FUNDACIÓN AMIGOS DEL PLANETA, LA ASOCIACIÓN DE CURTIDORES DE VILLAPINZÓN -ACURTIR-, LA SOCIEDAD BOGOTANA DE AGUAS Y SANEAMIENTO SUEZ LYONNAISE DES EAUX-DEGREMONT E.S.P. S.A. -BAS-, LA EMPRESA DE ACUEDUCTO Y ALCANTARILLADO DE BOGOTÁ E.A.A.B. E.S.P., LA CORPORACIÓN AUTÓNOMA REGIONAL DE CUNDINAMARCA -CAR-, EL DEPARTAMENTO DE CUNDINAMARCA, LA EMPRESA DE ENERGIA DE BOGOTÁ, EEB-, EL PROCURADOR TERCERO JUDICIAL ADMINISTRATIVO; LAS SOCIEDADES ALPINA PRODUCTOS ALIMENTICIOS S.A. -ALPINA-, ETERNIT COLOMBIANA S.A., LÍQUIDO CARBÓNICO COLOMBIANA S.A., SOCIEDAD CRISTALERÍA PELDAR S.A., REFINADORA DE SAL S.A. -REFISAL-, CERVECERÍA LEONA S.A. Y GRUPO SIDERÚRGICO DIACO S.A.-, INDUSTRIAS SPRING S.A, SOCIEDAD STANTON Y CÍA. LTDA. contra la sentencia de 25 de agosto y su complementaria de 16 de septiembre de 2004, proferidas por la Sección Cuarta, Subsección "B", del **TRIBUNAL ADMINISTRATIVO DE CUNDINAMARCA**, mediante las cuales se desestimó las excepciones de mérito propuestas por los demandados, se declaró responsable por acción a los habitantes e industrias de la cuenca por los vertimientos domésticos e industriales y por omisión a algunos demandados, se absolvió a otros, se amparó los derechos colectivos que encontró conculcados, se aprobó los pactos de cumplimiento con las observaciones y modificaciones establecidas en la sentencia, impartió directrices para

Expediente No. 25000-23-27-000-2001-0479-01  
 Acumulados Nos. 2000-0428, 2001-0122, 2001-0343  
 Actor: GUSTAVO MOYA ÁNGEL Y OTROS  
 Acción Popular

restituir las cosas al estado anterior, recordó la ejecución de precisas obras y gestiones a las autoridades demandadas, fijó a favor de los actores la suma equivalente a cincuenta (50) salarios mínimos legales mensuales por concepto de incentivo económico, negó las demás indemnizaciones y ordenó la constitución del Comité de Verificación del Cumplimiento del fallo en los siguientes términos:

**"PRIMERO: DESESTÍMANSE LAS EXCEPCIONES DE MÉRITO PROPUESTAS POR LOS DEMANDADOS Y DECLÁRANSE SOLIDARIAMENTE RESPONSABLES** de la CATÁSTROFE ECOLÓGICA DEL BOGOTÁ y DE LA CONTAMINACIÓN DE LOS RÍOS Y QUEBRADAS AFLUENTES DEL PRIMERO Y DE QUE DAN CUENTA LAS PRETENSIONES, **POR ACCIÓN** A TODOS LOS HABITANTES E INDUSTRIAS DE LA CUENCA QUE DESDE HACE NO MENOS DE VEINTE AÑOS HAN VENIDO REALIZANDO SUS VERTIMIENTOS DOMÉSTICOS E INDUSTRIALES SIN TRATAR como actores difusos, **POR OMISIÓN** EN EL CONTROL DE LOS VERTIMIENTOS DE LAS AGUAS RESIDUALES a la **NACIÓN-MINISTERIO DE MINAS Y ENERGÍA - MINISTERIO DE AMBIENTE VIVIENDA Y DESARROLLO TERRITORIAL (INSTITUTO DE HIDROLOGÍA Y METEOROLOGÍA, "IDEAM")**, al **MINISTERIO DE LA PROTECCIÓN SOCIAL (INVIMA)**, al **MINISTERIO DE AGRICULTURA**, a la **CORPORACIÓN AUTÓNOMA REGIONAL DE CUNDINAMARCA, "CAR"**, al **DISTRITO CAPITAL DE BOGOTÁ - DAMA - EMPRESA DE ACUEDUCTO Y ALCANTARILLADO DE BOGOTÁ - EMPRESA DE ENERGÍA ELÉCTRICA**, al **DEPARTAMENTO DE CUNDINAMARCA** y a los **MUNICIPIOS DE LA CUENCA ALTA: VILLAPINZÓN, CHOCONTÁ, SUESCA, SESQUILÉ, GACHANCIPÁ, TOCANCIPÁ, ZIPAQUIRÁ, SOPÓ, CAJICÁ, CHÍA, COTA**, de la **CUENCA MEDIA: FUNZA, MOSQUERA, SOACHA y MADRID**, y de la **CUENCA BAJA: al Municipio de SIBATÉ**, de acuerdo con las razones expuestas en la parte motiva de esta sentencia.

**SEGUNDO:** Por consiguiente, **AMPÁRANSE** los derechos colectivos a un **AMBIENTE SANO**, a la **SALUBRIDAD PÚBLICA** y a la **EFICIENTE PRESTACIÓN DE LOS SERVICIOS PÚBLICOS DOMICILIARIOS** dentro de los procesos acumulados por Acción Popular incoados

Expediente No. 25000-23-27-000-2001-0479-01  
Acumulados Nos. 2000-0428, 2001-0122, 2001-0343  
Actor: GUSTAVO MOYA ÁNGEL Y OTROS  
Acción Popular

por los señores GUSTAVO MOYA ÁNGEL (fallecido), MIGUEL ÁNGEL CHAVES GARCÍA, JORGE HUMBERTO GONZÁLEZ VILLANUEVA Y NICOLÁS ROA, y JORGE ENRIQUE CUERVO RAMÍREZ, de acuerdo con las razones expuestas en la parte motiva de esta providencia. Por consiguiente, **SALVAGUÁRDANSE** LOS ALUDIDOS DERECHOS COLECTIVOS mediante la **APROBACIÓN DE LOS PACTOS DE CUMPLIMIENTO** presentados por los entes públicos mencionados en el literal anterior en la forma y términos discutidos y aprobados en las respectivas audiencias por las partes del proceso y con las observaciones y modificaciones de que da cuenta la parte motiva de este fallo y con las órdenes y condenas que se consignarán en ordinal posterior.

**TERCERO:** Como consecuencia, para restituir las cosas a su estado anterior, esto es, para lograr la descontaminación del RÍO BOGOTÁ y SUS AFLUENTES de que dan cuenta las pretensiones y del EMBALSE DEL MUÑA, deberán observarse también las siguientes directrices respecto de la ejecución de las obras que en los pactos de cumplimiento se mencionan, en orden de prioridad: **a)** Control de vertimientos de aguas residuales y ejecución de los Programas de Producción Más Limpia en todos los sectores de la producción tanto de la industria casera como de la pequeña, mediana y gran industria, implementados y dirigidos por la CAR y por el DAMA, siguiendo las políticas trazadas por el MAVDT y con la participación y el control por delegación de los MUNICIPIOS, del DISTRITO CAPITAL y del DEPARTAMENTO DE CUNDINAMARCA; **b)** De conformidad con la función que el artículo 5 de la Ley 99 de 1993 le adscribe al MAVDT, en el término máximo de tres (3) meses contados a partir de la notificación de esta sentencia, éste debe proceder a delimitar geográficamente en forma clara cuáles son las **zonas excluidas de la minería**, esto es, dónde no podrán ejecutarse trabajos y obras de exploración y explotación minera, según la previsión del artículo 34 de la Ley 685 de 2001 o "Código de Minas" y bajo las directrices señaladas por la Corte Constitucional en la sentencia C-339 de 2002. Para tal efecto, la autoridad minera (que es la que se define y señala en el art. 317 de la citada ley, en

Expediente No. 25000-23-27-000-2001-0479-01  
Acumulados Nos. 2000-0428, 2001-0122, 2001-0343  
Actor: GUSTAVO MOYA ÁNGEL Y OTROS  
Acción Popular

principio el Ministerio de Minas y Energía) tiene el deber de colaboración, el cual no limita ni condiciona el ejercicio de la competencia de la autoridad ambiental quien es la que debe establecer tales zonas; **c)** Igualmente, en el término máximo de seis (6) meses contados a partir del vencimiento del plazo fijado en el literal b), el MAVDT con la intervención y colaboración del MINISTERIO DE MINAS Y ENERGÍA debe proceder en consecuencia a revocar y suspender los títulos, permisos, concesiones y licencias de las exploraciones mineras en las zonas de exclusión.; **d)** En el término máximo de seis (6) meses contados a partir de la notificación de esta sentencia, el MVADT, LA CAR y el DAMA y los municipios (en los casos en que hayan sido delegados por la respectiva autoridad ambiental -art. 54 y 55 Ley 99/93-) deberán proceder a adelantar los procesos administrativos tendientes a revocar, las licencias ambientales, los permisos, autorizaciones o concesiones para el uso y aprovechamiento de los recursos naturales y del medio ambiente cuando quiera que no se estén acatando las condiciones y exigencias en ellos establecidas o no se estén cumpliendo de acuerdo con los términos definidos en el acto de su expedición; **e)** Dentro del término de los seis meses (6) siguientes a la notificación de esta sentencia el MAVDT, la CAR y el DAMA y los municipios deberán iniciar todas las diligencias tendientes a exigir de los particulares o entes públicos o privados a los que se les haya otorgado las licencias ambientales, autorizaciones, permisos o concesiones a cielo abierto, o en una zona específica, la restauración o sustitución morfológica y ambiental de todo el suelo intervenido en la explotación, por cuenta de los beneficiarios de dichos títulos, permisos o licencias, y en su caso haciendo efectiva la garantía de la póliza de seguro constituida para tales efectos; quienes deberán proceder a la respectiva restauración dentro del término máximo de los cuatro (4) meses siguientes a la fecha en que sean requeridos so pena de la revocatoria o de la suspensión de los mismos por parte de la autoridad ambiental y con la correspondiente intervención del tribunal una vez se constate el desacato para hacer efectiva

Expediente No. 25000-23-27-000-2001-0479-01  
Acumulados Nos. 2000-0428, 2001-0122, 2001-0343  
Actor: GUSTAVO MOYA ÁNGEL Y OTROS  
Acción Popular

esta orden. Para tales efectos, **PREVÉNGASE** a la CAR y al DAMA como a los demás órganos ambientales en cuanto a que no podrán invertir los recursos destinados para saneamiento ambiental en programas de reforestación que son de cargo de los particulares a los cuales precisamente deberán exigir el cumplimiento de esta obligación. En relación con las familias que se encuentran lavando arenas en el RÍO TUNJUELO con necesidades básicas insatisfechas, la CAR y el DAMA dentro del territorio de su jurisdicción, respectivamente, con la participación del MINISTERIO DE MINAS Y ENERGÍA dentro de lo de su competencia, deberán hacer posible su reubicación en los demás complejos mineros, e igualmente, el DISTRITO CAPITAL como el DEPARTAMENTO DE CUNDINAMARCA y LA BENEFICENCIA DE CUNDINAMARCA deberán dar prioridad a los programas sociales y educativos de esta comunidad en la forma dispuesta en la parte motiva de esta sentencia **f)** EL MINISTERIO DE AGRICULTURA Y DESARROLLO RURAL en coordinación con el MINISTERIO DE LA PROTECCIÓN SOCIAL, deberán promover una política concreta y restrictiva sobre riego de cultivos y brebaje de ganado con aguas del río Bogotá y de sus afluentes y del Embalse del Muña, los cuales actualmente no cumplen con las normas de calidad para estos, especialmente sobre el control de la zona de ronda en orden a sancionar a los propietarios de los predios que no cerquen sus linderos para impedir el paso del ganado hacia la fuente hídrica; **g)** El incumplimiento de las anteriores órdenes tanto por los particulares como por las autoridades que deben ejercer el respectivo control, dará lugar a la compulsa de copias para ante la Fiscalía General de la Nación por la incursión o coparticipación en los delitos ecológicos tipificados en el Código Penal, en la forma como se indica en la parte motiva de esta sentencia; **h)** El Alcalde Mayor de Bogotá como máxima autoridad de policía del Distrito Capital (por conducto de los alcaldes locales) y los alcaldes municipales, éstos como máxima autoridad de policía dentro del territorio de sus jurisdicciones, deberán implementar, controlar y retener los productos agrícolas (en especial las hortalizas, frutas y verduras), el ganado mayor y menor y los productos pecuarios que se estén

Expediente No. 25000-23-27-000-2001-0479-01  
Acumulados Nos. 2000-0428, 2001-0122, 2001-0343  
Actor: GUSTAVO MOYA ÁNGEL Y OTROS  
Acción Popular

irrigando o alimentando con las aguas o pastos contaminados del o por el río Bogotá y del Embalse del Muña. El desacato a esta orden los hará incurso en las conductas penales contra la salubridad pública al igual que a quienes propicien dichas actividades, para lo cual se compulsarán las respectivas copias para ante la Fiscalía General de la Nación y los Alcaldes Locales del Distrito Capital de Bogotá deberán dar cumplimiento a lo dispuesto en el punto 610.5.; **i)** Creación de una sola red Hidrometereológica y estación de monitoreo de las aguas, en la forma prescrita en el punto 6.5.3. de la parte motiva, direccionadas por el INSTITUTO DE HIDROLOGÍA METEOROLOGÍA Y ESTUDIOS AMBIENTALES y alimentada con las bases de datos de la CORPORACIÓN AUTÓNOMA REGIONAL DE CUNDINAMARCA y del DEPARTAMENTO ADMINISTRATIVO DEL MEDIO AMBIENTE DE BOGOTÁ para toda el área de la CUENCA DEL río BOGOTÁ Y DE SUS AFLUENTES, con la constitución de un Fondo Común Económico y con el aporte de los recursos que para tales efectos dispongan en sus presupuestos, como los demás de todas las entidades involucradas en este proceso, quienes para tal efecto deberán contribuir en una cuota parte, en todo caso para optimizar el cumplimiento de dicha función y economizar los recursos, en la proporción que señalen las autoridades ambientales (si a así lo disponen) de común acuerdo con estos; a falta de acuerdo el tribunal definirá dicho aspecto; **j)** Control de vertimientos de aguas domésticas por el DISTRITO CAPITAL-DAMA-EMPRESA DE ACUEDUCTO Y ALCANTARILLADO y por los MUNICIPIOS DE LAS CUENCAS ALTA MEDIA Y BAJA DEL RÍO BOGOTÁ, con la dirección y coordinación a éstos por la CAR y por el DEPARTAMENTO DE CUNDINAMARCA especialmente de grasas, carbohidratos, nitratos y fosfatos. Para tales efectos, el INVIMA con la coordinación del MAVDT y como parte de la política del GOBIERNO NACIONAL, en el término de la presente o siguiente legislatura ordinaria, deberá presentar el correspondiente proyecto de ley ante el CONGRESO en orden a prohibir la fabricación y uso de los detergentes que contengan fosfatos y se reglamente e incentive la producción y uso de detergentes biodegradables con el fin de detener el proceso de eutroficación de las aguas que es

Expediente No. 25000-23-27-000-2001-0479-01  
Acumulados Nos. 2000-0428, 2001-0122, 2001-0343  
Actor: GUSTAVO MOYA ÁNGEL Y OTROS  
Acción Popular

la causa primordial del impacto ambiental en el Río y sus afluentes, por sobre todo a las alturas del EMBALSE DEL MUÑA, consagrándose las exclusiones o exenciones a que haya lugar para la importación o fabricación de las materias primas que se requieran o para los productos mismos, dejándose claro que la sola ejecución de esta medida producirá, de un lado, efectos positivos a corto plazo en la descontaminación del Río y, de otro lado, el ahorro de recursos en el tratamiento de las aguas residuales; **k)** Inclusión de los PRAES en la educación primaria, y media y tecnológica y superior, como cátedra obligatoria. Corresponderá al MINISTERIO DE EDUCACIÓN NACIONAL, además de fijar las políticas respectivas, la coordinación y dirección de los programas con las Secretarías de Educación Distrital, Departamental y Municipal y éstas con los respectivos centros de educación y a éstos con las asociaciones de padres de familia. La CÁMARA DE COMERCIO DE BOGOTÁ, junto con la ventanilla de ACERCAR y el DAMA, como los demás entes privados que quieran vincularse (Cajas de Compensación COMFENALCO), podrán colaborar en la ejecución de este programa con la participación de los industriales y de los diferentes centros comerciales para publicitar e incentivar en la comunidad el propósito común de descontaminar el Río y sus afluentes mediante las prácticas limpias, para lo cual en el Canal Institucional de la Televisión Nacional se deberá realizar propaganda alusiva a esos procesos de descontaminación en la fuente, con cargo a los recursos de los entes públicos demandados que deberán incluir este rubro dentro de sus presupuestos; **l)** Para reforzar el control de los vertimientos y la vigilancia sobre los cerros, montañas y laderas, en general sobre todos los suelos y aguas de la Sabana objetos de esta acción, especialmente en lo referente a la deforestación y el cumplimiento de los programas y obligaciones de reforestación por aquellas personas que no hayan dado cumplimiento a los estudios de Impacto Ambiental, o a los Planes de Manejo, en fin para el control de los PML, el MINISTERIO DE AMBIENTE VIVIENDA Y DESARROLLO TERRITORIAL deberá coordinar con el MINISTERIO DE DEFENSA y éste deberá apoyarlo mediante la

Expediente No. 25000-23-27-000-2001-0479-01  
Acumulados Nos. 2000-0428, 2001-0122, 2001-0343  
Actor: GUSTAVO MOYA ÁNGEL Y OTROS  
Acción Popular

prestación del SERVICIO MILITAR OBLIGATORIO AMBIENTAL, que será administrado por las entidades territoriales en la forma y en los términos preceptuados en el artículo 102 de la Ley 99 de 1993. Con los mismos propósitos y en cumplimiento de esta orden y según las prescripciones del artículo 101 Ibídem, el GOBIERNO NACIONAL deberá proceder a tomar las medidas necesarias para la creación o mayor cobertura del cuerpo de POLICÍA NACIONAL AMBIENTAL dentro de toda el área de la CUENCA DEL RÍO BOGOTÁ Y SUS AFLUENTES, de acuerdo con las razones expuestas en el punto 6.5.10.; 11) En orden a propiciar y controlar los procesos de producción más limpia de las curtiembres de VILLAPINZÓN y CHOCONTÁ, los MUNICIPIOS DE VILLAPINZÓN y de CHOCONTÁ con cargo a sus recursos y/o con la coordinación y cofinanciación del DEPARTAMENTO DE CUNDINAMARCA, la BENEFICENCIA DE CUNDINAMARCA, de la CORPORACIÓN AUTÓNOMA DE CUNDINAMARCA, quien tendrá bajo su responsabilidad la dirección y el cumplimiento de esta orden, la que también con cargo a su presupuesto gestionará los programas de producción más limpia dando prioridad a esta problemática, y con los buenos oficios de los MINISTERIOS DE AMBIENTE VIVIENDA Y DESARROLLO TERRITORIAL Y DE COMERCIO EXTERIOR, dentro del término máximo de un año (1) contado a partir de la notificación de la presente sentencia, deberán cofinanciar todas las obras de infraestructura que requieran dichos procesos de producción más limpia bajo -si es del caso- el sistema de COOPERACIÓN DEL GREMIO DE LAS CURTIEMBRES, según las directrices trazadas en la parte motiva de esta sentencia, procurando para aquellos que se encuentran con necesidades básicas insatisfechas en atención a la precariedad de sus patrimonios y que se ubican dentro de la ZONA DE RONDA DEL RÍO BOGOTÁ, subsidiarles los planes de vivienda en un término que no podrá sobrepasar de un año contado a partir de la notificación de este fallo. Por su parte, aquellos, deberán acatar las órdenes de la autoridad ambiental en lo tocante a los programas de producción más limpia, so pena de su exclusión de la cooperativa y el desalojo inmediato. De otro lado, quienes no se encuentren dentro de este último grupo, esto es los que de

Expediente No. 25000-23-27-000-2001-0479-01  
Acumulados Nos. 2000-0428, 2001-0122, 2001-0343  
Actor: GUSTAVO MOYA ÁNGEL Y OTROS  
Acción Popular

acuerdo con su declaración de renta estén en capacidad de costear sus propias viviendas deberán ser desalojados de la zona de ronda en el término máximo de seis (6) meses contados a partir de la notificación de esta sentencia; pero deberán ser incluidos dentro de los Programas de Producción Más limpia de que trata este aparte. En ningún caso habrá lugar a la compra o indemnización de predios que se encuentren dentro de la zona de ronda por tratarse de bienes de propiedad de la Nación y de uso público que ilegalmente fueron invadidos a sabiendas por los que en ellos se encuentran viviendo y adelantando sus procesos de producción de curtición y de los cuales se han usufructuado en detrimento del medio ambiente; m) Bajo las mismas directrices y en cumplimiento de las misma orden, el DISTRITO CAPITAL DE BOGOTÁ -DAMA, dentro del término máximo de un (1) año, deberá proceder en coordinación con los ministerios acabados de señalar a implementar, coordinar y poner en funcionamiento el PARQUE DE COEFICIENTE INDUSTRIAL DE LAS CURTIEMBRES DE SAN BENITO o en su lugar, implementar en cada una de las industrias los Procesos de Producción más Limpia. De igual manera, los industriales del Ramo deberán proceder en el sentido anotado, so pena del cierre de sus industrias. El tribunal por conducto del respectivo Comité de Vigilancia seguirá cada paso o trámite para el cumplimiento de las órdenes que se imparten en este literal como en el anterior, con el control de resultados mes a mes, para lo cual las respectivas autoridades Municipios, Departamento, CAR, DAMA y los respectivos ministerios deberán exhibir la correspondiente documentación so pena de la apertura del incidente de desacato; n) Los municipios de las Cuencas Alta y Media, en especial la Empresa de Acueducto y Alcantarillado de Bogotá, de conformidad con los POT, velarán por la recuperación y por la protección de las Zonas de Ronda de las quebradas y afluentes de que dan cuenta las pretensiones, como las del RÍO BOGOTÁ en los términos dispuestos en la parte motiva de este fallo; ñ) De conformidad con lo dispuesto en el punto 6.5.1.9. Los municipios y el Distrito capital deberán expedir dentro del término máximo de seis (6) meses la

Expediente No. 25000-23-27-000-2001-0479-01  
 Acumulados Nos. 2000-0428, 2001-0122, 2001-0343  
 Actor: GUSTAVO MOYA ÁNGEL Y OTROS  
 Acción Popular

reglamentación de los usos del suelo; **o)** De acuerdo con lo señalado en el punto 6.5.8. la CONTRALORÍA GENERAL DE LA NACIÓN, como las CONTRALORÍAS DISTRITAL Y DEPARTAMENTAL **DEBERÁN PROCEDER A EJERCER EL CORRESPONDIENTE CONTROL DE LOS RECURSOS CON DESTINO AL SANEAMIENTO AMBIENTAL PREVISTOS EN LA LEY** por parte de los entes públicos involucrados en la presente acción; **p)** En atención a lo dispuesto en el punto 6.5.9.6. los diferentes gremios de la producción que ejercen actividades en la CUENCA DEL RÍO BOGOTÁ Y SUS AFLUENTES deberán ingresar a los procesos de producción más limpia que promuevan la CAR y el DAMA en los respectivos territorios de su jurisdicción; **q) ORDÉNASE** a los MINISTERIOS DE LA PROTECCIÓN SOCIAL, DE MINAS Y ENERGÍA, DE COMERCIO EXTERIOR, DE AGRICULTURA y de EDUCACIÓN, al DEPARTAMENTO NACIONAL DE PLANEACIÓN para que planeen y ejecuten coordinadamente con el MINISTERIO DE AMBIENTE, VIVIENDA Y DESARROLLO TERRITORIAL todos los programas relacionados con las funciones adscritas en el artículo 5° de la Ley 99 de 1993, según los términos consignados en el punto 6.5.2.; **r) ORDÉNASE** a la CAR y al DAMA conformar el grupo de GUARDABOSQUES según lo previsto en el POMCO y de acuerdo con lo expresado en el punto 6.5.10.; **s)** Los Municipios deberán dar cumplimiento a las sentencias dictadas por este tribunal sobre la optimización de los mataderos y plantas de faenado en el término que en ellas se dispuso, como también las de aquellos municipios que no han sido objeto de la interposición de Acciones Populares sobre la materia y que estén contaminando las aguas con los residuos ruminales; **t)** La CAR, el DAMA y la EAAB y los Municipios deberán velar por la adecuada destinación de los recursos para la adquisición de los predios en orden a proteger las fuentes hídricas. La Contraloría General de la Nación, la Contraloría del Distrito Capital y Departamental deberán ejercer el control fiscal en forma oportuna con el fin de que los recursos destinados para el saneamiento ambiental de los ríos y quebradas no se dispersen, atendiendo a que la descontaminación es actividad prioritaria. **u)** Los Alcaldes Locales del Distrito Capital **DEBERÁN** controlar los vertimientos según las órdenes impartidas en el punto 6.10.15; **v)** El

Expediente No. 25000-23-27-000-2001-0479-01  
Acumulados Nos. 2000-0428, 2001-0122, 2001-0343  
Actor: GUSTAVO MOYA ÁNGEL Y OTROS  
Acción Popular

FONDO NACIONAL DE REGALÍAS y el MINISTERIO DE HACIENDA Y CRÉDITO PÚBLICO deberán dar cumplimiento a lo dispuesto en el punto 6.16.3. sobre las transferencias por concepto de regalías a los municipios y al Distrito Capital, debiendo pagar lo que hasta la presente adeudan a estos entes en los términos señalados en la parte motiva. Así también, dicho Ministerio deberá realizar las transferencias de Ley 715 correspondientes al 41% del Propósito General a los municipios de la Cuenca Alta, Media y Baja del RÍO BOGOTÁ, como al Distrito Capital; **x)** Todos los entes involucrados en la presente acción deberán dar cumplimiento a lo dispuesto en el punto 6.5.4.7. respecto a la autorización por la MESA REGIONAL DE LA CUENCA DEL RÍO RÍO BOGOTÁ Distrito Capital-Departamento de Cundinamarca y del Tribunal para adelantar nuevas investigaciones teniendo en cuenta la innovación tecnológica que se presente y que contribuya al saneamiento del RÍO BOGOTÁ y del EMBALSE DEL MUÑA.

**CUARTO: DECLÁRASE** que la descontaminación del RÍO RÍO BOGOTÁ y sus afluentes de que dan cuenta las pretensiones y del EMBALSE DEL MUÑA, también comprende la ejecución de las siguientes obras que fueron materia de análisis y aprobación en los respectivos pactos de cumplimiento como por la MESA DE SOLUCIÓN TÉCNICA INTEGRAL PARA LA DESCONTAMINACIÓN DEL RÍO BOGOTÁ que para el efecto se llevó a cabo con la intervención de todos los técnicos expertos que representaron a cada uno de los entes públicos demandados, como se da cuenta en la parte motiva: **a)** Diseño, construcción y ejecución de los PLANES MAESTROS DE ACUEDUCTO Y ALCANTARILLADO en todos los municipios de las Cuencas Alta, Media y Baja, en la forma y dentro de los términos señalados en los respectivos pactos de cumplimiento de los municipios y del Distrito Capital de Bogotá, para lo cual se aprueban las diferentes propuestas de los pactos de cumplimiento, en todo caso la construcción de las redes de alcantarillado y de los interceptores no podrá sobrepasar del año 2009, por lo cual, las que se hubieren proyectado con posterioridad a ese año, deberán ajustarse a lo aquí dispuesto. Con relación a los municipios

Expediente No. 25000-23-27-000-2001-0479-01  
Acumulados Nos. 2000-0428, 2001-0122, 2001-0343  
Actor: GUSTAVO MOYA ÁNGEL Y OTROS  
Acción Popular

de la Cuenca Baja, que no concurrieron al proceso, el DEPARTAMENTO DE CUNDINAMARCA en atención a las funciones que se le asignan en el artículo 64 de la Ley 99 de 1993, deberá promover, coordinar y cofinanciar, con el apoyo de la Nación-Ministerio del Medio Ambiente si es del caso (a falta de la suficiencia de los recursos de los entes municipales de esta cuenca), los diseños y la ejecución de sus respectivos planes maestros de acueducto y alcantarillado en un plazo que no podrá, igualmente, exceder del año 2009. **b)** Los municipios como el Distrito Capital deberán proceder a la separación de las redes pluviales de las de alcantarillado desde el mismo momento de su diseño y así ejecutarán sus planes maestros. Para aquellos donde se han construido en forma mixta deberán proceder a separarlas, una vez se haya cumplido con las metas de cobertura de acueducto y alcantarillado; **c)** Dentro del término máximo de tres (3) años, contados a partir de la fecha de presentación en audiencia de su pacto de cumplimiento, la CORPORACIÓN AUTÓNOMA REGIONAL DE CUNDINAMARCA deberá realizar las obras y mejoras que requieren las Plantas de Tratamiento de su propiedad que tiene instaladas en los municipios de que da cuenta la parte motiva de este fallo para colocarlas en capacidad de tratar en óptimas condiciones el efluente residual que cada una de esas localidades esté vertiendo a las mismas y, los municipios deberán comenzar a operarlas con cargo a sus tarifas y recursos inmediatamente la CAR dé cumplimiento a lo aquí dispuesto, de acuerdo con lo aprobado respecto de este punto en las audiencias de discusión de los respectivos pactos, presentados por ésta como por aquellos. En todo caso, en orden a garantizar la operación y mantenimiento de las PTAR, la CAR, podrá contratar un solo operador regional, con el cobro de las tarifas respectivas a los municipios y, estos, a su vez, podrán incluir este pago con cargo a las tarifas de acueducto y alcantarillado de los usuarios de acuerdo con lo prescrito en el artículo 16 de la Resolución CRA 287 de 2004; **ch)** El IDEAM deberá realizar la caracterización física, química y biológica a la entrada y salida de las plantas de tratamiento de aguas residuales de propiedad de

Expediente No. 25000-23-27-000-2001-0479-01  
Acumulados Nos. 2000-0428, 2001-0122, 2001-0343  
Actor: GUSTAVO MOYA ÁNGEL Y OTROS  
Acción Popular

la CAR, luego de ser puestas en óptimas condiciones para entregar a los municipios; **d)** Los municipios deberán construir las plantas de tratamiento que se requieran para dar total cobertura al tratamiento de sus aguas residuales en un término que no podrá sobrepasar del año 2009. En todo caso, el Municipio de Villapinzón deberá proceder en el término máximo de los tres (3) años siguientes a la fecha de la notificación de la presente sentencia a construir su planta de tratamiento de aguas residuales, según los términos previstos en el punto 6.9.7. **e)** Como parte de las alternativas de solución técnica ofrecidas o propuestas por parte del DISTRITO CAPITAL-DAMA-EMPRESA DE ACUEDUCTO Y ALCANTARILLADO DE BOGOTÁ (además del diseño y ejecución de todo su Plan Maestro de Acueducto y Alcantarillado en el Distrito Capital de Bogotá que se consideran son parte integrante de la medida de que trata el literal a) de este aparte de la resolutive), **APRÚEBASE** la AMPLIACIÓN DE LA PLANTA DE TRATAMIENTO DEL SALITRE para tratar un efluente no inferior a una capacidad de 8 m<sup>3</sup>/s, la construcción de los INTERCEPTORES SALITRE-TUNJUELO, FUCHA-TUNJUELO, la ESTACIÓN ELEVADORA TUNJUELO, el INTERCEPTOR TUNJUELO-CANOAS, la ESTACIÓN ELEVADORA CANOAS, la PLANTA DE TRATAMIENTO CANOAS BAJO EL TRATAMIENTO PRIMARIO QUÍMICAMENTE ASISTIDO y con la capacidad para tratar el efluente que determine el MINISTERIO DE AMBIENTE, VIVIENDA Y DESARROLLO TERRITORIAL al conceder la respectiva licencia ambiental y, la construcción del INTERCEPTOR CANOAS ALICACHÍN. El distrito Capital-EAAB a largo plazo deberá proceder hacia el tratamiento terciario de las aguas tal y como se prescribe en la parte motiva de este fallo; **f)** **APRÚEBASE** EL PACTO DE CUMPLIMIENTO PRESENTADO POR LA EMPRESA DE ENERGÍA DE BOGOTÁ Y POR LA EMPRESA GENERADORA DE ENERGÍA "EMGESA" en los términos señalados en su propuesta de pacto y aprobados por las partes, con la siguiente modificación respecto a la operación de las obras del embalse: EMGESA y la EEB deberán asumir la operación y mantenimiento de las obras a que se refiere el numeral 6.10.4.3. (Dragado y disposición de lodos, Operación y mantenimiento de sistemas de aireación, Cosecha y disposición de buchón), de

Expediente No. 25000-23-27-000-2001-0479-01  
Acumulados Nos. 2000-0428, 2001-0122, 2001-0343  
Actor: GUSTAVO MOYA ÁNGEL Y OTROS  
Acción Popular

la siguiente manera: la primera hasta el año 2007 y la segunda hasta el año 2009. En adelante la CAR, el MUNICIPIO DE SIBATÉ y por los demás MUNICIPIOS que reciben transferencias de EMGESA o del sector eléctrico, destinarán un porcentaje atendiendo al monto de los recursos que cada uno percibe, descontado el que les corresponde aportar para la operación y mantenimiento de la PTAR CANOAS en la forma como se dispone en la parte motiva de esta sentencia y hasta tanto la EAAB asuma el costo por este concepto. **g) APRÚEBASE** el Pacto de Cumplimiento presentado por la CAR con la aclaración como se indicó en la respectiva audiencia, que el cumplimiento de la obligación de que trata el Parágrafo 2° del artículo 44 de la Ley 99 de 1993, esto es del 50% del producto correspondiente al recaudo del porcentaje o sobretasa del impuesto predial y otros gravámenes a la propiedad inmueble, deberá destinarse en los términos dispuestos en esta sentencia; **h) EL DRAGADO** del RÍO BOGOTÁ Y DE SUS AFLUENTES correrá con cargo a los recursos de la EAAB, de la CAR del MAVDT y del MINISTERIO DE MINAS Y ENERGÍA en la forma señalada en el punto 6.18. de la parte motiva de este fallo.

**QUINTO:** Así mismo, las obras sobre las que trata el literal e) del ordinal anterior, se construirán en el siguiente término y con cargo a las siguientes entidades y recursos: **a)** Para los efectos de la construcción del interceptor TUNJUELO - CANOAS para el cual la EAAB no lo tiene proyectado dentro de las tarifas, el DISTRITO CAPITAL deberá realizar una transferencia de recursos superior al 30% del 41% del Propósito General, de tal forma que alcance a cubrir su terminación; **b)** La misma transferencia deberá continuar haciendo una vez se haya construido dicho interceptor dentro del plazo convenido en la propuesta de pacto y aprobado por el tribunal, en un porcentaje que no podrá ser inferior al 50% del 41% del Propósito General, con destino a la construcción de la Planta de Tratamiento de Canoas y para su posterior operación y mantenimiento, hasta tanto la EAAB pueda asumir su costo con cargo a las tarifas; Para tales efectos se conminará a la NACIÓN - MINISTERIO DE HACIENDA Y CRÉDITO PÚBLICO para que

Expediente No. 25000-23-27-000-2001-0479-01  
Acumulados Nos. 2000-0428, 2001-0122, 2001-0343  
Actor: GUSTAVO MOYA ÁNGEL Y OTROS  
Acción Popular

cumpla en forma oportuna Y SIN DILACIONES con la obligación de transferir al Distrito los recursos de la Ley 715 del Propósito General; **c)** Siendo insuficientes los anteriores recursos para la construcción de la PLANTA ELEVADORA DE CANOAS, LA PLANTA DE TRATAMIENTO DE CANOAS y el interceptor CANOAS ALICACHÍN, su costo debe ser cubierto no solo con las transferencias de ley 715 por parte del Distrito acabada de señalar, sino con las transferencias que la CAR debe hacer al DISTRITO CAPITAL por el 50% del Predial, previa deducción de los costos de ampliación de la PTAR SALITRE, y en lo que reste, serán los recursos por tasa retributiva incluida en las tarifas de la empresa prestataria del servicio proyectados al año 2009, los que deben quedar afectos para su construcción para lo cual deberá constituirse un FONDO CUENTA con todos los recursos que en forma oportuna deberán trasladar las entidades involucradas. En ese orden, teniendo en cuenta la magnitud de las obras que la EAAB está emprendiendo y debe ejecutar en un lapso que no puede sobrepasar al año 2009, se requiere para la aprobación de los correspondientes créditos, que la NACIÓN preste su aval a la empresa en orden a obtenerlos, que como se previó para el Contrato 015 pueden acudir a la pignoración de tales rentas proyectadas en los años según el precio de las mismas, que permita la pronta consecución de los recursos con los que deben ejecutarse las obras. El pago de los réditos de la deuda se hará con cargo a los recursos de la Nación teniendo en cuenta que todos las entidades demandadas han cohonestado con su actuar omisivo a la agravación del daño ecológico como ampliamente ha quedado analizado en esta sentencia, por lo que todas deben contribuir con sus recursos a la restauración de las fuentes de agua afectadas tal y como lo prevé el artículo 34 de la Ley 472 de 1998; **d)** De igual manera, para efectos de la operación y el mantenimiento de la PTAR CANOAS se hará con cargo a los recursos por Ley 715 del Distrito Capital que perciba después del año 2009, y con las transferencias del sector eléctrico a la CAR y a los municipios, especialmente Sibaté que recibe un porcentaje mayor que los demás, de la siguiente manera: El Distrito Capital aportará el 50% del 41% del Propósito General, la suma que

Expediente No. 25000-23-27-000-2001-0479-01  
 Acumulados Nos. 2000-0428, 2001-0122, 2001-0343  
 Actor: GUSTAVO MOYA ÁNGEL Y OTROS  
 Acción Popular

reste del precio de la operación descontado dicho porcentaje será cubierta por partes iguales por la CAR, el MUNICIPIO DE SIBATÉ y por los municipios que reciben las transferencias, considerados estos últimos como una sola parte para efectos de dividir en tres partes el saldo; e) Una vez pagada la deuda por concepto de la construcción de la PTAR CANOAS, la EAAB asumirá su operación y mantenimiento con cargo a las tarifas como lo prevé el artículo 16 de la Resolución CRA 287 de 2004 y con el apoyo de los recursos acabados de señalar.

**SEXTO:** Igualmente, **APRUÉBANSE LOS PACTOS DE CUMPLIMIENTO** presentados por las INDUSTRIAS ETERNIT COLOMBIANA S.A., LÍQUIDO CARBÓNICO COLOMBIANA S.A., S.A., ALPINA, GRUPO SIDERÚRGICO DIACO, STANTON & CIA S.A., ESPUMADOS S.A., PAPELES Y CORRUGADOS ANDINA S.A., EMPRESA COLOMBIANA DE CABLES EMCOCABLES S.A., con la ejecución de las obras y en los términos en ellos propuestas. Respecto de CRISTALERÍA PELDAR, REFISAL y MALTERÍAS DE COLOMBIA S.A **DECLARÁSE** que si bien no existen unas propuestas concretas son empresas que deberán continuar con sus procesos de producción hacia la certificación de la Norma ISO 14001. Con la misma observación y en atención al tratamiento de sus aguas residuales **DECLÁRASE** que la COMPAÑÍA NACIONAL DE VIDRIOS S.A., no vierte sus aguas residuales hacia el río Bogotá sin tratar. En cuanto a las sociedades PROTEÍNAS Y ENERGÉTICOS DE COLOMBIA S.A., DISTRIBUIDORA TROPIABASTOS LTDA. Y UNIABASTOS EN LIQUIDACIÓN **TIÉNESE** como probada la actuación que sobre sus procesos de producción reposa en la CAR, la que deberá continuar con el control ambiental a estas industrias bajo las metas señaladas. **RECHÁZASE** la nulidad interpuesta por el MAVDT.

**SÉPTIMO: DECLÁRASE** como no probada la excepción de **COSA JUZGADA** que interponen la CAR, EMGESA y la EMPRESA DE ACUEDUCTO Y ALCANTARILLADO DE BOGOTÁ y **NIÉGANSE LA DENUNCIA DEL PLEITO Y LOS LLAMAMIENTOS EN GARANTÍA** que incoan la EMPRESA DE ENERGÍA DE BOGOTÁ y la EMPRESA GENERADORA DE ENERGÍA "EMGESA" respectivamente. Respecto de la OBJECCIÓN POR ERROR GRAVE al dictamen pericial presentado por los auxiliares FABIO ROBERTO PÉREZ

Expediente No. 25000-23-27-000-2001-0479-01  
Acumulados Nos. 2000-0428, 2001-0122, 2001-0343  
Actor: GUSTAVO MOYA ÁNGEL Y OTROS  
Acción Popular

y JOSÉ MANUEL GONZÁLEZ, como respecto al señalamiento de sus honorarios **ESTÉSE** a lo dispuesto en el punto 6.17, según las motivaciones de este fallo.

**OCTAVO:** EL PRESIDENTE DE LA REPÚBLICA Y EL CONGRESO DE LA REPÚBLICA, dentro de los límites de su competencia, **DEBERÁN REVISAR Y READECUAR** las funciones que desarrollan el MAVDT y LA CAR como autoridades ambientales con el fin de asegurar la ejecución de las políticas y programas ambientales, según las consideraciones señaladas en los puntos 6.I.3.3., 6.I.3.4. y 6.I.3.5. Así mismo, EL PRESIDENTE DE LA REPÚBLICA, como suprema autoridad administrativa de la política ambiental que ocupa el primer lugar dentro del SINA **DEBERÁ VELAR** por el cumplimiento de esta sentencia, para lo cual, dentro de los límites de su competencia podrá acudir hasta el mecanismo de la declaratoria del Estado Emergencia Ecológica, según las razones expuestas en la parte motiva de este fallo.

**NOVENO:** **ABSUÉLVANSE** de las pretensiones a la COMISIÓN REGULADORA DE AGUA POTABLE, al INSTITUTO GEOGRÁFICO AGUSTÍN CODAZZI, a la SUPERINTENDENCIA DE SERVICIOS PÚBLICOS DOMICILIARIOS, de acuerdo con las motivaciones; así mismo a la SOCIEDAD BOGOTANA DE AGUAS SUEZ LYONNAISE DES EAUX DEGREMONT E.S.P. S.A., respecto de la cual el cumplimiento del contrato 015 corresponderá al Juez Contencioso Administrativo a cuya competencia está adscrita el examen de legalidad, como también la tiene para el contrato de concesión que para el efecto se celebró y se compulsarán copias de las piezas procesales pertinentes con destino a la Contraloría General de la República y a la Fiscalía General de la Nación para que investiguen el detrimento que al fisco se ha causado, como las conductas ilícitas en que se haya podido incurrir, según las razones expuestas en el punto 6.22. de este fallo.

**DÉCIMO:** **CONSTITÚYESE EL COMITÉ** para la verificación del cumplimiento de esta sentencia con las personas y fundaciones que se relacionan en la parte motiva de esta providencia.

Expediente No. 25000-23-27-000-2001-0479-01  
Acumulados Nos. 2000-0428, 2001-0122, 2001-0343  
Actor: GUSTAVO MOYA ÁNGEL Y OTROS  
Acción Popular

**DÉCIMO PRIMERO: FÍJESE** como incentivo para cada uno de los mencionados actores la suma de CINCUENTA SALARIOS MÍNIMOS LEGALES MENSUALES, cuyo pago corre en el porcentaje y a cargo de las entidades de que da cuenta la parte motiva de esta sentencia. **NIÉGANSE** las demás indemnizaciones de acuerdo con lo señalado en la parte motiva de este fallo.

**DUODÉCIMO: ORDÉNASE** la publicación de la parte resolutive de esta sentencia en un diario de amplia circulación nacional a cargo del DISTRITO CAPITAL DE BOGOTÁ, quien podrá repetir contra los demás demandados por los costos de la misma. **ÁBRASE** cuaderno separado de copias de esta sentencia para efectos de llevar a cabo la audiencia para la conformación del comité de vigilancia y control para el cumplimiento de los pactos. En auto separado se señalará fecha para la misma.

**DÉCIMO TERCERO:** Para los fines previstos en el artículo 80 de la Ley 472 de 1998, **REMÍTASE** al Defensor del Pueblo copia de la presente decisión" (fls. 470 a 496, cdno. 9.1, Mayúsculas y negrillas fijas del original).

Como se advirtió en el sub lite se trata de los procesos acumulados AP-Nos. 2001-90479, 2001-0428, 2000-0122 y 2001-0343.

Expediente No. 25000-23-27-000-2001-0479-01  
Acumulados Nos. 2000-0428, 2001-0122, 2001-0343  
Actor: GUSTAVO MOYA ÁNGEL Y OTROS  
Acción Popular

## ANTECEDENTES

### I

#### ANTECEDENTES DE LAS DEMANDAS ACUMULADAS

##### I.1. ACCIÓN POPULAR 25000-23-27-000-2001-0479-01

ACTOR: GUSTAVO MOYA ÁNGEL

##### I.I.1. DEMANDA

El señor **GUSTAVO MOYA ÁNGEL**, en ejercicio de la acción popular prevista en el artículo 1005 del Código Civil, presentó demanda el 1º de octubre de 1992 ante los Juzgados Civiles del Circuito de Bogotá contra la **EMPRESA DE ENERGÍA ELÉCTRICA DE BOGOTÁ** (fls. 1 a 10, cdno. 1), con miras a lograr la protección de los derechos e intereses colectivos relacionados con el goce de un ambiente sano, la seguridad y salubridad pública y la protección de los derechos de los usuarios, para lo cual formuló las siguientes pretensiones:

**"PRIMERA.** - *Declare que como consecuencia de los vertimientos y almacenamiento de aguas negras efectuadas por la EMPRESA DE ENERGÍA ELÉCTRICA DE BOGOTÁ sobre el denominado "Embalse del Muña", ubicado en jurisdicción del Municipio de Sibaté, Departamento de Cundinamarca, se han producido los siguientes daños y perjuicios a la comunidad:*

*1. Se ha dañado de manera grave el medio ambiente y los elementos del espacio público en las áreas*

Expediente No. 25000-23-27-000-2001-0479-01  
 Acumulados Nos. 2000-0428, 2001-0122, 2001-0343  
 Actor: GUSTAVO MOYA ÁNGEL Y OTROS  
 Acción Popular

circunvecinas, en especial las aguas y el oxígeno, elementos vitales para la comunidad.

2. Daño en la salud de los usuarios y habitantes de la región, en tanto que las malas condiciones fitosanitarias han determinado la ocurrencia de un alto índice de enfermedades.

3. Daño a las personas en sus patrimonios, en tanto que las malas condiciones del medio ambiente han demeritado el debido aprovechamiento de sus bienes y por lo tanto afectado su valor comercial.

**SEGUNDA** - Que en consecuencia, se condene a la EMPRESA DE ENERGÍA ELÉCTRICA DE BOGOTÁ a realizar las obras necesarias para dar el debido tratamiento a las aguas que almacena en el "Embalse del Muña", de manera que se evite el perjuicio que viene ocasionando sobre el ambiente, el espacio público y los residentes y vecinos de la región.

**TERCERA** - Que se ordene a la demandada, de conformidad a lo dispuesto en el inciso 2º del artículo 1005 del Código Civil Colombiano, recompensar al actor con una suma que no sea inferior de la décima parte ni exceda la tercera parte del valor de las obras necesarias que la demandada tenga que realizar, para efectuar el previo tratamiento de las aguas negras que deposita en el "Embalse del Muña".

**CUARTA** - Que se condene en costas a la entidad demandada" (fls. 64 y 65, cdno. 1. Mayúsculas y negrillas del original).

### **I.I.2. HECHOS**

Los hechos en que se fundamentó la demanda son, en resumen, los siguientes:

1. El "Embalse del Muña" se encuentra situado en el extremo sur de la sabana de Bogotá, sobre el costado

Expediente No. 25000-23-27-000-2001-0479-01  
Acumulados Nos. 2000-0428, 2001-0122, 2001-0343  
Actor: GUSTAVO MOYA ÁNGEL Y OTROS  
Acción Popular

oriental del río Bogotá, en jurisdicción del Municipio de Sibaté - Departamento de Cundinamarca. El mismo se formó con las aguas de los ríos Muña y Aguas Claras.

2. En toda la región aledaña al embalse se presenta contaminación ambiental causada por el bombeo y almacenamiento de aguas negras por parte de la EMPRESA DE ENERGÍA ELECTRICA DE BOGOTA (E.E.B.), por lo que se ha generado un foco de infecciones en perjuicio de la salud de los residentes, especialmente de la población infantil.

3. La E.E.B. conocedora del grave daño que se está ocasionando a la comunidad de Sibaté, ordenó estudios dirigidos a diagnosticar la solución del problema, los cuales apuntan a la construcción y el montaje de plantas de tratamiento de aguas negras antes de ser depositadas en el mencionado embalse, sin que hasta la fecha de la demanda se hubiese emprendido una sola obra.

#### **I.I.3. ACTUACIONES SURTIDAS ANTE EL JUZGADO SEGUNDO (2) CIVIL DEL CIRCUITO Y EL TRIBUNAL ADMINISTRATIVO DE CUNDINAMARCA - SECCIÓN CUARTA**

Realizado el reparto respectivo de la demanda impetrada por el señor Gustavo Moya Ángel, le correspondió su conocimiento al Juzgado Segundo (2) Civil del Circuito, quien admitió la demanda y ordenó la notificación a la EMPRESA DE ENERGÍA DE BOGOTÁ E.E.B. (fl. 17, cdno. 1).

Surtida la anterior diligencia, la accionada en su escrito de contestación propuso las excepciones previas

Expediente No. 25000-23-27-000-2001-0479-01  
Acumulados Nos. 2000-0428, 2001-0122, 2001-0343  
Actor: GUSTAVO MOYA ÁNGEL Y OTROS  
Acción Popular

denominadas "*falta de jurisdicción y competencia e inepta demanda*", las cuales fueron declaradas probadas mediante proveído del 13 de julio de 1993. Inconforme con la decisión el actor interpuso recurso de apelación ante el superior, el cual fue resuelto a través del auto de 7 de julio de 1997 (fls. 5 a 13, anexo 3, bis 5), en el sentido de revocar en todas sus partes el auto en mención y, en su lugar, declarar no probadas las excepciones formuladas.

En la misma providencia la Sala Civil del Tribunal Superior ordenó, de una parte, notificar al MINISTERIO DEL MEDIO AMBIENTE sobre la existencia del proceso y, de otra, citar a la COMPAÑÍA DE SEGUROS LA NACIONAL S.A. como llamado en garantía.

En atención a lo decidido, el Juzgado Segundo Civil del Circuito a través del auto fechado el 8 de septiembre de 1997 (fl. 72, cdno. 1) dispuso la notificación al Ministerio del Medio Ambiente y, en lo concerniente al llamamiento en garantía, ordenó reanudar el término de suspensión con el fin de hacer la respectiva citación. Las actuaciones fueron cumplidas mediante notificación de 27 de abril de 1998 (fls. 87 a 94, cdno. 1) y citación de 9 de octubre de 1997 (fls. 23 a 29, anexo 3, bis 6).

En escrito separado el representante judicial de la E.E.B. denunció el pleito a la CORPORACIÓN AUTÓNOMA REGIONAL DE LAS CUENCAS DE LOS RÍOS BOGOTÁ, UBATÉ Y SUÁREZ, toda vez que de acuerdo con el artículo 4º, literales d, e y f de la Ley 3ª de 1961, ésta es la competente para regular e implementar todas las políticas

**Expediente No. 25000-23-27-000-2001-0479-01**  
**Acumulados Nos. 2000-0428, 2001-0122, 2001-0343**  
**Actor: GUSTAVO MOYA ÁNGEL Y OTROS**  
**Acción Popular**

encaminadas a la descontaminación de las aguas (fls. 1 a 4, anexo 3, bis 4). Con fundamento en el inciso 2° del artículo 54 del C.P.C., el Juzgado le concedió el término de cinco (5) días para que aportara el certificado de representación legal del demandado so pena de rechazo (fl. 5, anexo 3, bis 4).

Posteriormente, a través del auto fechado el 20 de octubre de 1998 y con ocasión del fallecimiento del señor GUSTAVO MOYA ÁNGEL, el Juzgado Segundo ordenó la citación al proceso de la cónyuge supérstite - SARA MARIELA PARRAGA (fls. 126, cdno. 1) la cual concurrió al proceso a través del representante judicial que venía actuando como apoderado del actor (fls. 127 y 128, cdno. 1).

Por auto de 15 de enero de 1999, se abrió a pruebas el proceso, se decretaron y practicaron unos testimonios, se ordenó una inspección judicial con exhibición de documentos en las oficinas de la Empresa de Energía Eléctrica de Bogotá y una al Embalse del Muña con intervención de peritos (fls. 129 y 130, cdno. 1).

Estando pendiente la culminación de la práctica de la prueba pericial y en atención a la solicitud realizada por el Agente del Ministerio Público, mediante auto calendado el 5 de julio del año 2001 (fls. 486 y 487, cdno. 1), la juez de conocimiento dispuso remitir por competencia el proceso al Tribunal Administrativo de Cundinamarca.

Posteriormente, la Sección Cuarta de la mencionada Corporación, en auto fechado el 31 de agosto de 2001

Expediente No. 25000-23-27-000-2001-0479-01  
Acumulados Nos. 2000-0428, 2001-0122, 2001-0343  
Actor: GUSTAVO MOYA ÁNGEL Y OTROS  
Acción Popular

(fls. 305 a 307, cdno. 1), decidió avocar conocimiento de la acción popular instaurada por el señor Moya Ángel, al considerar que la competencia varió con ocasión de las reglas establecidas en la Ley 472 de 1998, en la misma se decidió conservar la validez de todo lo actuado tal y como lo dispone el artículo 21 del C.P.C.

En el numeral segundo de la parte resolutive del mencionado auto, el Tribunal señaló fecha y hora para que se llevara a cabo la AUDIENCIA ESPECIAL DE PACTO DE CUMPLIMIENTO a que hace referencia el artículo 27 de la Ley 472 de 1998 (fl. 307, cdno. 1). Al efecto se libraron las siguientes citaciones: al apoderado de la parte actora (fl. 309, cdno. 1), al MINISTERIO DEL MEDIO AMBIENTE (fl. 310, cdno. 1), a la EMPRESA DE ENERGÍA DE BOGOTÁ (fl. 311, cdno. 1), a la ASEGURADORA COLSEGUROS S.A. y a la EMPRESA GENERADORA DE ENERGÍA - EMGESA S.A., ésta última en atención a la petición realizada previamente por la E.E.B. (fls. 282 a 284, cdno. 1).

Llegado el día señalado por el a-quo (17 de septiembre de 2001), se constituyó la audiencia en presencia de los citados (fls. 319 a 323, cdno. 1), en la misma se resolvió vincular a EMGESA S.A. en su condición de litisconsorte necesario para lo cual se ordenó correrle traslado de la demanda con su respectivos anexos. Asimismo y de acuerdo con lo expuesto por el representante del Ministerio Público se ordenó la vinculación del DEPARTAMENTO DE CUNDINAMARCA - SECRETARÍA DEPARTAMENTAL DE SALUD, del DISTRITO CAPITAL - SECRETARÍA DISTRITAL DE SALUD, de la CORPORACIÓN AUTÓNOMA REGIONAL DE CUNDINAMARCA - CAR, del DEPARTAMENTO TÉCNICO

Expediente No. 25000-23-27-000-2001-0479-01  
 Acumulados Nos. 2000-0428, 2001-0122, 2001-0343  
 Actor: GUSTAVO MOYA ÁNGEL Y OTROS  
 Acción Popular

ADMINISTRATIVO DEL MEDIO AMBIENTE - DAMA y del MUNICIPIO DE SIBATÉ, como también de todos los entes territoriales que de acuerdo con la certificación que se allegará por la E.E.B. se encontraren en la rivera de la cuenca del río Bogotá, tales como VILLAPINZÓN, CHOCONTÁ, SUESCA, SESQUILÉ, GACHANCIPÁ, TOCANCIPÁ, ZIPAQUIRÁ, SOPÓ, CAJICÁ, CHÍA, COTA, FUNZA y SOACHA (fls. 351 y 352, cdno. 1).

## **I.2. ACCIÓN POPULAR AP-No.2001-0122**

**ACTORES: MIGUEL ÁNGEL CHAVES GARCÍA Y JORGE HUMBERTO GONZÁLEZ VILLANUEVA**

### **I.2.1. DEMANDA**

Mediante escrito presentado el 29 de julio de 2000 ante la Secretaría General del Tribunal Administrativo de Cundinamarca (fls. 1 a 26, cdno 1.1), los señores **MIGUEL ÁNGEL CHAVES GARCÍA y JORGE HUMBERTO GONZÁLEZ VILLANUEVA**, en ejercicio de la acción popular consagrada en el artículo 88 de la Constitución Política, desarrollado por la Ley 472 de 1998, presentaron demanda contra los **MINISTERIOS DEL MEDIO AMBIENTE, HACIENDA Y CRÉDITO PÚBLICO, AGRICULTURA Y DESARROLLO RURAL, SALUD, DESARROLLO ECONÓMICO, MINAS Y ENERGÍA, EDUCACIÓN NACIONAL, EL DEPARTAMENTO DE PLANEACIÓN NACIONAL -DNP-, EL INSTITUTO DE HIDROLOGÍA, METEOROLOGÍA Y ESTUDIOS AMBIENTALES "IDEAM", LA CORPORACIÓN AUTÓNOMA REGIONAL DE CUNDINAMARCA "CAR", EL DEPARTAMENTO DE CUNDINAMARCA, LA BENEFICENCIA DE CUNDINAMARCA, EL MUNICIPIO DE SIBATÉ, EL MUNICIPIO DE SOACHA, LA EMPRESA GENERADORA DE ENERGÍA S.A. "EMGESA S.A.", EL DISTRITO CAPITAL Y LA EMPRESA DE**

Expediente No. 25000-23-27-000-2001-0479-01  
Acumulados Nos. 2000-0428, 2001-0122, 2001-0343  
Actor: GUSTAVO MOYA ÁNGEL Y OTROS  
Acción Popular

**ACUEDUCTO Y ALCANTARILLADO DE BOGOTÁ, E.P.S**, con miras a obtener la protección de los derechos colectivos al goce de un ambiente sano, al equilibrio ecológico y a la seguridad y salubridad pública, que estiman vulnerados.

En auto de 28 de febrero de 2002 (fl. 703, cdno. 1 bis), el juez constitucional de instancia decretó la acumulación del expediente No. 2000-0122 al proceso No. 2001-90479, toda vez que ambos se relacionan con los vertimientos y almacenamientos de aguas negras efectuadas por la Empresa de Energía Eléctrica de Bogotá en el denominado Embalse del Muña.

### **I.2.2. HECHOS**

Los hechos en que se fundamentó la demanda son, en resumen, los siguientes:

1. La contaminación de la Represa del Muña es un problema ambiental grave que sale del ámbito local para tener una connotación de orden Nacional, Departamental y Municipal, representando un peligro para la vida de los habitantes de las zonas de influencia.

2. El río Bogotá se ha convertido en la última década en lugar donde se depositan toda clase de vertimientos, sin que hasta la fecha exista autoridad ambiental alguna que se haya preocupado por buscar una solución integral al mismo.

3. Se trata de un grave problema de contaminación que afecta al Río, generando en consecuencia la total

Expediente No. 25000-23-27-000-2001-0479-01  
Acumulados Nos. 2000-0428, 2001-0122, 2001-0343  
Actor: GUSTAVO MOYA ÁNGEL Y OTROS  
Acción Popular

desaparición del oxígeno disuelto y la capacidad de autodepuración, lo cual hace que sus aguas sean anóxicas y ambientalmente incompatibles con cualquier tipo de uso.

4. El problema se ha generado principalmente con el desarrollo del Distrito Capital, de los municipios del área de su influencia y de las industrias ubicadas a lo largo del trayecto desde su nacimiento hasta la desembocadura al río grande.

5. La sociedad Emgesa S.A. toma las aguas del río Bogotá y las vierte directamente a la Represa del Muña sin ningún tipo de tratamiento primario, secundario y mucho menos terciario, por lo que se trata del origen y la causa directa del grave daño ambiental de la represa.

4. No existe una política de Estado frente a la contaminación del río Bogotá. Se carece de control efectivo sobre el vertimiento de las aguas por parte de las industrias y la población. Todo ello ha convertido al Río en una "cloaca", sin capacidad de depuración, y lo ha inutilizado como corredor vial, sin que hasta la fecha exista acto administrativo, ni judicial que obligue a las entidades demandadas a ejecutar una solución concreta e íntegra para solucionar el problema.

### **I.2.3. PRETENSIONES**

Los accionantes persiguen:

*1. Que se declare que las entidades demandadas por acción o por omisión son directa y solidariamente responsables del desequilibrio y*

Expediente No. 25000-23-27-000-2001-0479-01  
Acumulados Nos. 2000-0428, 2001-0122, 2001-0343  
Actor: GUSTAVO MOYA ÁNGEL Y OTROS  
Acción Popular

el grave daño ecológico ambiental actual de la REPRESA DEL MUÑA, con ocasión de la contaminación por los vertimientos directos efectuados por el sistema de bombeo de las aguas negras del río Bogotá (Clasificadas como Clase C), sin ningún tipo de tratamiento previo, lo cual ha ocasionado perjuicios graves al medio ambiente, así como a los cuerpos de agua que la alimentan (río Muña y aguas claras); la desaparición de la flora y fauna acuática de la represa; suelo, al aire, a la salud, y que atentan directamente a la población en general del Municipio de Sibaté y a los habitantes del área de su influencia.

2. Que se (sic) como consecuencia de lo anterior se condene solidariamente a los demandados a reparar el grave daño ambiental ocasionado dentro del término prudencial que se llegue a establecer y se les ordene la recuperación total del ecosistema biótico de la REPRESA DEL MUÑA y especialmente los ríos Muña, Aguas Claras, afluentes de la misma; su entorno paisajístico; su preservación como zona de especial protección ambiental y patrimonio natural del Departamento de Cundinamarca y de la Nación: para que se enmarque dentro de un desarrollo sostenible de la Región, y que redunde en el restablecimiento de los derechos colectivos ambientales vulnerados y que repercutan en el mejoramiento de la calidad de vida de todas las personas directamente perjudicadas; partiendo de los Estudios de Impacto Ambiental efectuados hasta la fecha, por los diferentes organismos que se lleguen a acreditar dentro de la actuación y los que en el curso del proceso sean necesarios hacer.

3. Que se condene solidariamente a los demandados al pago de los daños y perjuicios ocasionados con ocasión del grave daño ambiental denunciado, a favor de las personas directamente afectadas y a las que lleguen a demostrarlo en concreto y/o los que se lleguen a establecer por medio de peritos idóneos que solicito se designen, teniendo en cuenta los daños ambientales causados hasta la fecha de la admisión de esta acción popular por parte del Despacho, en concordancia con lo establecido en el inciso primero del art. 34 de la Ley 472/93.

Expediente No. 25000-23-27-000-2001-0479-01  
Acumulados Nos. 2000-0428, 2001-0122, 2001-0343  
Actor: GUSTAVO MOYA ÁNGEL Y OTROS  
Acción Popular

*4. Que se condene solidariamente a los demandados al pago de costas y gastos del proceso, y demás condenas si ha (sic) ello hubiere lugar" (fl. 446, cdno. 1 bis).*

#### **I.2.4. COADYUVANCIA DE LA DEFENSORÍA DEL PUEBLO - REGIONAL CUNDINAMARCA**

En escrito visible a folios 665 a 667 del expediente (cdno. I.1.), la Defensoría del Pueblo coadyuvó en el proceso de la referencia.

Manifestó que tal y como lo establece el artículo 24 de la Ley 472 de 1998, la Defensoría tiene la obligación de proteger y defender los derechos e intereses de la comunidad.

Precisó que los hechos y pretensiones tienen soporte real en el sentido de que efectivamente existe un desequilibrio y grave daño ecológico a la represa del Muña, lo anterior en razón a los vertimientos directos efectuados por el sistema de bombeo de las aguas negras del río Bogotá, sin ningún tratamiento previo, causando perjuicios graves, desapareciendo la flora y la fauna acuática de la represa, suelo, aire y afectándose la salud de los habitantes de esa jurisdicción.

La intervención fue admitida a través de la providencia fechada el 9 de julio de 2001 (fl. 677, cdno. I.1.)

Expediente No. 25000-23-27-000-2001-0479-01  
Acumulados Nos. 2000-0428, 2001-0122, 2001-0343  
Actor: GUSTAVO MOYA ÁNGEL Y OTROS  
Acción Popular

### **I.3. ACCIÓN POPULAR Núm. 2000 - 0428**

**ACTOR: JORGE ENRIQUE CUERVO RAMÍREZ**

#### **I.3.1. DEMANDA**

En escrito visible a folios 8 a 19 del expediente (cdno. 1.2) el señor **JORGE ENRIQUE CUERVO RAMÍREZ** presentó demanda de acción popular el 4 de agosto de 1999, contra el **DISTRITO CAPITAL DE BOGOTÁ y la EMPRESA DE ACUEDUCTO Y ALCANTARILLADO DE BOGOTÁ E.A.A.B.- E.S.P.**, con miras a lograr la protección de los derechos colectivos al goce de un ambiente sano y a la salubridad pública, previstos en los literales a) y g), del artículo 4º de la Ley 472 de 1998, que estima vulnerados.

#### **I.3.2. HECHOS**

Los hechos en que se fundamenta la demanda son, en resumen, los siguientes:

1. La Sabana de Bogotá se encuentra bañada por el río Bogotá, alimentado por varios ríos, que se ha venido deteriorando como consecuencia del vertimiento de aguas negras en su cauce, con gran irresponsabilidad "de nuestros administradores".

2. Las alcaldías locales han otorgado permisos para la construcción de viviendas e instalación de industrias en las zonas de ronda que le cambian el uso al suelo, o por medio de conductas omisivas, han permitido violar la Constitución y también el uso de ríos y quebradas.

Expediente No. 25000-23-27-000-2001-0479-01  
Acumulados Nos. 2000-0428, 2001-0122, 2001-0343  
Actor: GUSTAVO MOYA ÁNGEL Y OTROS  
Acción Popular

3. La "E.A.A.B" ha utilizado y permitido el uso del río Bogotá, alimentado por otros ríos como receptores y conductores de aguas servidas (domésticas e industriales). También ha tutelado su utilización con los mismos fines por urbanizadores legales e ilegales, a unos autorizándolos y a otros simplemente permitiéndoles la utilización con idénticos propósitos.

4. Algunos de los daños generados para cada una de las localidades bañadas por los ríos y quebradas, son: problemas de deforestación, movimiento de tierras por la extracción, sedimentos y pérdida del suelo, contaminación por residuos sólidos, depósitos de basuras domésticas, de materiales de construcción y desperdicios de los talleres de mecánica, desaparición del ecosistema, tala de árboles, incendios forestales, invasión de rondas y urbanizaciones, aguas negras generadas por industrias cargadas de sustancias químicas grasas, aceites, y plásticos.

### **I.3.3. PRETENSIONES**

El actor pretende:

a. Que los demandados **SANTA FE DE BOGOTÁ D.C.**, persona jurídica de derecho público, creada por ley y reconocida por la Constitución Política de Colombia, representada por el señor Enrique Peñalosa Londoño, mayor de edad, vecino de Santa Fe de Bogotá, residencia en la carrera 8ª No. 10 - 65 de esta ciudad, y la Empresa de Acueducto y Alcantarillado de Bogotá E.A.A.B., persona jurídica de derecho público del orden Distrital, domiciliada en la calle 22C No. 40 - 99 de esta ciudad, representada por el señor Daniel Boada

Expediente No. 25000-23-27-000-2001-0479-01  
Acumulados Nos. 2000-0428, 2001-0122, 2001-0343  
Actor: GUSTAVO MOYA ÁNGEL Y OTROS  
Acción Popular

Salazar, mayor de edad, vecino de Santa Fe de Bogotá, residenciado en la calle 22c No. 40 - 99 de esta ciudad, son responsables de la contaminación ambiental de los ríos, el río Bogotá, su principal arteria fluvial y medio de navegabilidad, el cual era a su vez alimentado por los ríos Salitre, Arzobispo, San Francisco, San Agustín, San Cristóbal, Tunjuelito, Fucha, Juan Amarillo y río Negro, al igual que las quebradas de Torca, La Floresta, La Cita, San Cristóbal, Delicias, el Carmen, Contador, la Chorrera, La Vieja, Rosales, Chicó, Las Delicias, de San Diego, San Dionisio Norte, Manzanares, Monserrate, Quebradas del Zuque, Yomasa, Santa Librada, Bolonia, Chiguaza (la Pichoza), El Alañadero, la Taza, la Trompeta, la Limas, Quebrada de San Juanito, Quiba, Trompetas, Mochuelo, la Estrella, El infierno, Calderón, Bebedero y Aguas Calientes, Hierbabuena, Chuscal, los cuales constituía (sic) una gran hoya hidrográfica, al realizar en forma directa vertimientos de aguas residuales (domésticas e industriales) en los precitados ríos y quebradas, como también al permitir que los distintos urbanizadores legales e ilegales, con el beneplácito o sin éste, los utilizaran como zona de descargue de aguas domésticas e industriales, lo cual trajo como consecuencia: la contaminación de las aguas, la pérdida del nivel freático, el vaso y cauce de las precitadas corrientes, pérdidas de sus rondas, lugares de amortiguación y ecosistemas, pérdida del caudal de los ríos y quebradas anteriormente relacionadas, colmatación de las aguas negras como consecuencia de las partículas en suspensión y material de arrastre transportado en cada uno de ellos, alteración ostensible al medio ambiente.

b. Que los demandados **SANTA FE DE BOGOTÁ D.C.**, persona jurídica de derecho público, creada por ley y reconocida por la Constitución Política de Colombia, representada por el señor Enrique Peñalosa Londoño, mayor de edad, vecino de Santa Fe de Bogotá, residencia en la carrera 8ª No. 10 - 65 de esta ciudad, y la Empresa de Acueducto y Alcantarillado de Bogotá E.A.A.B., persona jurídica de derecho público del orden Distrital, residenciada en la calle 22 C no. 40 - 99 de esta

Expediente No. 25000-23-27-000-2001-0479-01  
Acumulados Nos. 2000-0428, 2001-0122, 2001-0343  
Actor: GUSTAVO MOYA ÁNGEL Y OTROS  
Acción Popular

ciudad, representada por el señor Daniel Boada Salazar, mayor de edad, vecino de Santa Fe de Bogotá, residenciado en la calle 22c No. 40 - 99 de esta ciudad, son responsables de la contaminación ambiental de los ríos, el río Bogotá, su principal arteria fluvial y medio de navegabilidad, el cual era a su vez alimentado por los ríos Salitre, Arzobispo, San Francisco, San Agustín, San Cristóbal, Tunjuelito, Fucha, Juan Amarillo y río Negro, al igual que las quebradas de Torca, La Floresta, La cita, San Cristóbal, Delicias, el Carmen, Contador, la Chorrea, La Vieja, Rosales, Chicó, Las Delicias, de San Diego, San Dionisio Norte, Manzanares, Monserate, Quebradas del Zuque, Yomasa, Santa Librada, Bolonia, Chiguaza (la Pichoza), El Alañadero, la Taza, la Trompeta, la Limas, Quebrada de San Juanito, Quiba, Trompetas, Mochuelo, la Estrella, El infierno, Calderón, Bebedero y Aguas Calientes, Hierbabuena, Chuscal al cambiar y permitir que se cambiara el uso del suelo de las rondas al igual que permitiendo y/o tuteando la construcción de complejos Urbanísticos e industriales en la zona de influencia de las aguas de estos ríos e incluso permitiendo la invasión de las mismas, con claro peligro para la vida y bienes de esas personas, la cual trae consigo:

- Que las personas no se respetara (sic) los cuerpos de aguas como un bien de uso público.
- Que se levanten edificaciones en zonas de uso público (rondas y zonas de influencia de los mismos (30 metros acuerdo 06 de 1990).
- Que de hecho y de derecho se cambiara el uso del suelo sin el lleno de los requisitos de ley.
- Que se produzcan deslizamientos y agrietamientos de unidades habitacionales enteras con graves perjuicios para el patrimonio de los moradores y de la misma demanda Santa Fe de Bogotá como de la Empresa de Acueducto y Alcantarillado de Santa Fe de Bogotá E.A.A.B.

c. Que los demandados **SANTA FE DE BOGOTÁ D.C.**, persona jurídica de derecho público, creada por ley y reconocida por la Constitución Política de Colombia, representada por el señor Enrique Peñalosa Londoño, mayor de edad, vecino de Santa

Expediente No. 25000-23-27-000-2001-0479-01  
Acumulados Nos. 2000-0428, 2001-0122, 2001-0343  
Actor: GUSTAVO MOYA ÁNGEL Y OTROS  
Acción Popular

Fe de Bogotá, residencia en la carrera 8ª No. 10 - 65 de esta ciudad, y la Empresa de Acueducto y Alcantarillado de Bogotá E.A.A.B., persona jurídica de derecho público del orden Distrital, residenciada en la calle 22 C no. 40 - 99 de esta ciudad, representada por el señor Daniel Boada Salazar, mayor de edad, vecino de Santa Fe de Bogotá, residenciado en la calle 22c No. 40 - 99 de esta ciudad, son responsables de la contaminación ambiental de los ríos Bogotá, su principal arteria fluvial y medio de navegabilidad, el cual era a su vez alimentado por los ríos Salitre, Arzobispo, San Francisco, San Agustín, San Cristóbal, Tunjuelito, Fucha, Juan Amarillo y río Negro, al igual que las quebradas de Torca, La Floresta, La cita, San Cristóbal, Delicias, el Carmen, Contador, la Chorrea, La Vieja, Rosales, Chicó, Las Delicias, de San Diego, San Dionisio Norte, Manzanares, Monserrate, Quebradas del Zuque, Yomasa, Santa Librada, Bolonia, Chiguaza (la Pichoza), El Alañadero, la Taza, la Trompeta, la Limas, Quebrada de San Juanito, Quiba, Trompetas, Mochuelo, la Estrella, El infierno, Calderón, Bebedero y Aguas Calientes, Hierbabuena, Chuscal, al utilizarlos como medio de transporte de aguas lluvias y servidas (domésticas e Industriales) en forma mezclada, destruyendo el paisaje como el entorno de los mismos, al igual que los reservorios naturales, los cuales le servían como mecanismos de amortiguación en caso de inundación con clara protección para su mismo entorno en caso de inundaciones o desbordamientos de éstos, por cuya conducta se ha visto afectado el medio ambiente por:

- Mayor peligro para la población ribereña.
- Incremento en los índices de morbilidad de los ciudadanos ribereños, al igual que la potencialidad para adquirir enfermedades infectocontagiosas de la población ribereña.
- Mayores riesgos para la población ribereña al tutelar la invasión de sus rondas y zonas de influencia.
- Cambio en el uso del suelo en forma fáctica de su parte, lo que a su vez indujo a que se procediera a rellenarse los sitios de amortiguación de las cuencas.

Expediente No. 25000-23-27-000-2001-0479-01  
Acumulados Nos. 2000-0428, 2001-0122, 2001-0343  
Actor: GUSTAVO MOYA ÁNGEL Y OTROS  
Acción Popular

-El deslizamiento de tierras y derrumbe de viviendas, agrietamientos de casas y como consecuencia, pérdida de vidas y bienes (Quebrada del Zuque y la Pichosa) donde hubo más de 10 muertos.

d. Que como consecuencia de las anteriores responsabilidades se le condene a:

I. Abstenerse de realizar nuevos vertimientos de aguas servidas en los ríos y quebradas.

II. Se ordene a la Empresa de Acueducto y Alcantarillado de Bogotá E.A.A.B., a que recupere el nivel freático y su cauce en cada uno de los ríos y quebradas.

III. Se le ordene a la Alcaldía Mayor de Santa Fe de Bogotá, que incluya dentro de su Plan de Ordenamiento Territorial - POT, como en el Plan de Ordenamiento Territorial de cada una de las Alcaldías Locales la recuperación de los ríos que la bañan al igual que las quebradas que tributan en estos y de los ecosistemas de cada uno de ellos, como mecanismo de protección de estos cuerpos de agua, necesarios para el sistema hídrico de la Ciudad, por ser éstos el medio natural de amortización de las aguas lluvias y de las cuencas que atraviesan la Sabana de Bogotá.

IV. Se condene a los demandados a recuperar el espacio físico de cada uno de los ríos: demoliendo lo construido en ellos, reabriendo su vaso, ordenando se proceda a su amojonamiento, teniendo en cuenta su zona de influencia y una franja de protección mínima de 30 metros como lo establece el Acuerdo 6/90, por constituirse ésta igualmente en espacio público, readquiriendo los terrenos si esto se hace necesario, realizando el acotamiento correspondiente a cada chucua, humedal o cuerpo hídrico antes relacionado.

V. Adecuarlos hidráulicamente al punto que los ríos Bogotá y Tunjuelito y las quebradas que los tributan pueden desbordarse, recuperándolos junto con sus lugares de amortiguamiento que permita el drenaje de las aguas, sin que se le cause daño a las personas o a sus bienes.

Expediente No. 25000-23-27-000-2001-0479-01  
 Acumulados Nos. 2000-0428, 2001-0122, 2001-0343  
 Actor: GUSTAVO MOYA ÁNGEL Y OTROS  
 Acción Popular

VI. Que se le ordene a la Empresa de Acueducto y Alcantarillado a recuperar y mantener no solo los cauces sino los nacederos de los mismos como elemento fundamental de ellos.

e. Que se separe las aguas lluvias de las aguas negras por diferentes colectores, vertiendo las primeras a los ríos señalados y las segundas en planta de tratamiento para ser arrojados posteriormente a los ríos.

f. Que se ordene a la Empresa preservar lagunas como Boca Negra, laguna Grande, de los Tunjos o Latona, y las represas o embalses de Chisacá y la Regadera, las cuales constituyen hoy por hoy las fuentes hídricas de la Sabana y de la cual se nutre el Acueducto de Santa Fe de Bogotá.

g. A pagar a nuestro (sic) poderdantes los derechos de que tratan los artículos 1.005 y 2.360 del C.C. concordantes con el artículo 132 del Decreto 2.303 de 1989 y demás normas concordantes, como las costas judiciales, si se oponen a la demanda" (fls. 8 a 10, cdno. I.2.)

#### **I.4. ACCIÓN POPULAR AP-No.2001-0343**

**ACTORES: MIGUEL ÁNGEL CHÁVEZ GARCÍA, JORGE HUMBERTO GONZÁLEZ Y NICOLÁS DÍAZ ROA**

##### **I.4.1. DEMANDA**

Los señores **MIGUEL ÁNGEL CHÁVEZ GARCÍA, JORGE HUMBERTO GONZÁLEZ y NICOLÁS DÍAZ ROA**, actuando en nombre propio, interpusieron el 12 de junio de 2001 ante el Tribunal Administrativo de Cundinamarca acción popular contra los **MINISTERIOS DEL MEDIO AMBIENTE, DESARROLLO ECONÓMICO, AGRICULTURA Y DESARROLLO RURAL, SALUD y de EDUCACIÓN NACIONAL, el DEPARTAMENTO DE PLANEACIÓN NACIONAL, EL INSTITUTO DE HIDROLOGÍA, METEOROLOGÍA Y ESTUDIOS**

Expediente No. 25000-23-27-000-2001-0479-01  
Acumulados Nos. 2000-0428, 2001-0122, 2001-0343  
Actor: GUSTAVO MOYA ÁNGEL Y OTROS  
Acción Popular

AMBIENTALES "IDEAM", EL INSTITUTO GEOGRÁFICO AGUSTÍN CODAZZI, LA SUPERINTENDENCIA DE SERVICIOS PÚBLICOS DOMICILIARIOS, LA COMISIÓN DE REGULACIÓN DE AGUA POTABLE Y SANEAMIENTO BÁSICO, LA CORPORACIÓN AUTÓNOMA REGIONAL DE CUNDINAMARCA "CAR", EL DEPARTAMENTO DE CUNDINAMARCA, LOS MUNICIPIOS DE CHOCONTÁ, VILLAPINZÓN, SUESCA, SESQUILÉ, GACHANCIPÁ, TOCANCIPÁ, LA CALERA, SOPÓ, CAJICÁ, ZIPAQUIRÁ, CHÍA, COTA, TABIO, TENJO, Y EN CONTRA DE PERSONAS JURÍDICAS O NATURALES QUE SE LLEGUEN A DETERMINAR, con miras a lograr la protección de los derechos colectivos al goce de un ambiente sano, a la existencia del equilibrio ecológico y el manejo y aprovechamiento racional de los recursos naturales para garantizar su desarrollo sostenible, su conservación, restauración o sustitución, el goce del espacio público, la seguridad y salubridad pública, el acceso a una infraestructura de servicios públicos que garanticen la salubridad pública, previstos en los literales a), c), d), g) y j) del artículo 4º de la Ley 472 de 1998, que estima vulnerados.

#### **I.4.2. HECHOS**

Los hechos en que se fundamenta la demanda son, en resumen, los siguientes:

1. El río Bogotá, nace en la Laguna del Valle, ubicada en el Páramo de Guachaneque, en el Municipio de Villapinzón a 3200 msnm.

Expediente No. 25000-23-27-000-2001-0479-01  
Acumulados Nos. 2000-0428, 2001-0122, 2001-0343  
Actor: GUSTAVO MOYA ÁNGEL Y OTROS  
Acción Popular

2. A lo largo de 89 kilómetros, desde su nacimiento hasta Tibitoc, recibe las aguas de los ríos Tejar, Sisga, Neusa, San Francisco, Negro, Barandillas, Teusacá, Frio, Chicú, cada uno recibe el aporte de diferentes quebradas, entre otras Sosa, Masato, San Pedro, Quincha, Guagüita, Piedra Gorda, Aposentos, de la jurisdicción del Municipio de Villapinzón; June, en Suesca, La Venta y Los Árboles en Sesquilé. Durante su trayecto sufre cambios así:

- DEL MUNICIPIO DE VILLAPINZÓN recibe vertimientos de las aguas residuales domésticas e industriales, sin tratamiento previo provenientes de la población, del matadero Municipal y de las curtiembres. La ronda del Río se encuentra deforestada, sin ningún sistema de alcantarillado público. Cuenta con un relleno sanitario construido a cielo abierto por la CAR donde no se le está dando tratamiento adecuado a los residuos sólidos, lo que constituye otro factor de contaminación al medio ambiente de la región.
- DEL MUNICIPIO DE CHOCONTÁ sigue recibiendo las descargas de aguas residuales porque cuenta con una ineficiente planta de tratamiento implementada por la CAR.
- DEL MUNICIPIO DE SUESCA, recibe los vertimientos de las aguas residuales y de escorrentía provenientes de minas de carbón, ladrilleras, y los vertimientos de una pasteurizadora, pues su planta de tratamiento no cumple con los parámetros de eficiencia.

Expediente No. 25000-23-27-000-2001-0479-01  
Acumulados Nos. 2000-0428, 2001-0122, 2001-0343  
Actor: GUSTAVO MOYA ÁNGEL Y OTROS  
Acción Popular

- DEL MUNICIPIO DE SESQUILÉ, recibe los vertimientos de las aguas negras y residuales de los cultivos de flores, minas de carbón y aguas del embalse del río Tominé, porque las lagunas de oxidación existentes permiten que los parámetros del vertimiento sobrepasen los límites permisibles, pues no son lo suficientemente idóneas a pesar de que la CAR manifiesta que ha invertido cuantiosas sumas de dinero. Además se arrojan toneladas de residuos sólidos.
- DEL MUNICIPIO DE GACHANCIPÁ, se vierten directamente aguas residuales, los residuos del matadero y de la población, porque no tiene planta de tratamiento ni zanjones de oxidación.
- DEL MUNICIPIO DE TOCANCIPÁ recibe aguas negras y las areneras, así como los vertimientos de la planta de Termozipa por cenizas de la combustión del carbón bituminoso, pues no funciona el sistema de tratamiento de aguas residuales, ni el secado de lodos.
- DEL MUNICIPIO DE LA CALERA, recibe vertimientos de aguas residuales domésticas al río Teusacá, que a su vez es tributario del río Bogotá.
- DEL MUNICIPIO DE CAJICÁ, recibe olores nauseabundos de los zanjones de oxidación y vertimientos finales arrojados al río sin observancia de la normatividad ambiental.

Expediente No. 25000-23-27-000-2001-0479-01  
 Acumulados Nos. 2000-0428, 2001-0122, 2001-0343  
 Actor: GUSTAVO MOYA ÁNGEL Y OTROS  
 Acción Popular

- LOS MUNICIPIOS DE ZIPAQUIRÁ, CHÍA, TABIO Y TENJO, descargan sus aguas residuales en el río Chicú, afluente del río Bogotá, por lo que contribuyen igualmente a su contaminación.
- La CAR y el Municipio de Villapinzón han suscrito convenios interadministrativos implementando obras de construcción para plantas de tratamiento de aguas residuales. Posteriormente la CAR informó al Municipio la imposibilidad de desarrollar el proyecto, sin aclaración en ese sentido, demostrando la falta de seriedad, coordinación en la planeación, y el despilfarro de los dineros públicos.
- En la Cuenca Alta es ostensible el daño ambiental en la flora, fauna acuática, agua, y el perjuicio causado a los habitantes de los territorios aledaños a la ronda del río.

#### **I.4.3. PRETENSIONES**

Los accionantes persiguen:

**PRIMERO.** -Que se declare que las entidades demandadas por acción o por omisión son directa y solidariamente responsables del grave deterioro y daño ecológico ambiental que sufre el río Funza (Bogotá) en la cuenca alta, y sus afluentes (especialmente las quebradas Sosa, del Masato, San Pedro, Quincha, Guangüita, Aposentos, Piedra Gorda, de la jurisdicción del Municipio de Villapinzón, quebrada June del Municipio de Suesca, río Tejar del Municipio de Chocontá), durante todo el trayecto comprendido desde su nacimiento del río(Laguna del Valle - Páramo de

Expediente No. 25000-23-27-000-2001-0479-01  
Acumulados Nos. 2000-0428, 2001-0122, 2001-0343  
Actor: GUSTAVO MOYA ÁNGEL Y OTROS  
Acción Popular

Guachaneque), hasta la planta de tratamiento de Tibitoc, con ocasión de la contaminación por vertimientos domésticos e industriales producidos por las Entidades Territoriales demandadas y los productos agroindustriales utilizados sin control en la agricultura, que de manera directa son arrojados sin ningún tipo de tratamiento previo, lo cual ha ocasionado graves perjuicios al medio ambiente y a los cuerpos de agua que lo alimentan; causando igualmente un grave desequilibrio ecológico en todo su trayecto, con lo cual se está destruyendo no sólo la vía acuática, sino afectando gravemente todo el ecosistema y principalmente el medio ambiente (agua, suelo y aire) y que atentan directamente el ecosistema de la sabana y a los habitantes del área de influencia de la cuenca, quienes junto con los demás habitantes del Departamento y de la Nación, tienen el derecho fundamental de gozar de un ambiente sano.

**SEGUNDO.-** Que como consecuencia de lo anterior se condene solidariamente a los demandados a reparar el daño ambiental ocasionado y se ordene la recuperación de la cuenca alta del río Bogotá, dentro del término prudencial que se llegue a establecer y en consecuencia se les ordene:

2.1. La recuperación total del ecosistema biótico de la cuenca alta del río Bogotá y especialmente los afluentes del mismo.

2.2. Se les ordene determinar alinderar el corredor periférico o ronda del Río, en el área que se llegue a establecer de manera concertada con sus propietarios y se restablezca el entorno paisajístico.

2.3. Se les ordene su preservación como corredor y zona de especial protección ambiental y patrimonio natural del Departamento de Cundinamarca y de la Nación; para que se enmarque dentro de un desarrollo sostenible de la Región y pueda ser un corredor turístico y de transporte fluvial y que redunde en el restablecimiento de los derechos colectivos ambientales vulnerados, con repercusión del mejoramiento de la calidad de vida de todas las personas directamente

Expediente No. 25000-23-27-000-2001-0479-01  
Acumulados Nos. 2000-0428, 2001-0122, 2001-0343  
Actor: GUSTAVO MOYA ÁNGEL Y OTROS  
Acción Popular

perjudicadas, partiendo de los Estudios de Impacto Ambiental efectuados hasta la fecha, por los diferentes organismos que se lleguen a acreditar dentro de la actuación y los que en el curso del proceso sean necesarios hacer.

2.4. Se les ordene efectuar las obras o actividades dirigidas a recuperar, restaurar, o reparar las condiciones del medio ambiente afectado (medidas de corrección Art. 1 Dcto. 1753/94), en consecuencia se les ordene la construcción y puesta en marcha de sistemas de tratamientos de las aguas residuales domésticas e industriales (Plantas de tratamientos) a las Entidades Territoriales demandadas; principalmente a los Municipios de Villapinzón y Chocontá, estas se realicen dentro de los predios que conforman el Distrito Sanitario de Villapinzón y Chocontá, el cual así fue declarado por la Entidad Ambiental demandada y los cuales están hoy totalmente abandonados.

2.5. Se les ordene efectuar la recolección municipal de los residuos líquidos, por medio de tuberías y conductos que sean separadas de las aguas lluvias y se conduzca directamente a las plantas de tratamiento; es decir se construya el sistema de alcantarillado de los Municipios demandados y principalmente los de Villapinzón y Chocontá, con la observancia y el cumplimiento de las normas que existan para tal efecto.

2.6. Se les ordene a las Entidades demandadas delimitar y alinderar, y amojonar el área que constituye la rivera del Río Funza o Bogotá desde su nacimiento hasta la planta de Tibitoc, que constituye la cuenca alta y se ordene a quien legalmente le corresponda, se adelanten las acciones administrativas o judiciales, necesarias a fin de recuperar el espacio público que dicha área constituye, como bien de uso público exclusivo, y se le ordene a las personas que la ocupan, sean reubicadas y/o indemnizadas previo la aplicación del proceso de expropiación administrativo o judicial respectivo a quienes ostenten títulos de derecho de dominio; o se efectúe su recuperación mediante un programa de concertación, utilizando los mecanismos de

Expediente No. 25000-23-27-000-2001-0479-01  
Acumulados Nos. 2000-0428, 2001-0122, 2001-0343  
Actor: GUSTAVO MOYA ÁNGEL Y OTROS  
Acción Popular

participación ciudadana, toda para que dicha área sea recuperada y se constituya en un corredor paralelo al Río de especial protección del Estado y como futura fuente de recreación pasiva y contemplativa para el Departamento y en beneficio de toda la Nación.

**TERCERO.** - Que se declare que los Municipios demandados están obligados a pagar la tasa retributiva, establecida en el Decreto No. 1594 de 1984 del Ministerio de Salud, en el Decreto 901 de 1997, y reglamentadas en las Resoluciones Nos. 273 de 1997 y 372 de 1998, del Ministerio del Medio Ambiente, con ocasión de los vertimientos puntuales, por las descargas de aguas residuales domésticas e industriales arrojados directamente al río Bogotá, sin ningún tipo de tratamiento previo, que sobrepasan los límites permitidos en dicha normativa y que se llegue a establecer pericialmente en esta acción pública, dentro del periodo comprendido entre el 1º de enero de 1995 o desde la fecha que pericialmente se llegue a establecer la existencia de dicha obligación y hasta la fecha de la ejecutoria de la sentencia de esta acción popular.

**CUARTO.** - Que como consecuencia de la anterior o similar declaración, se condene a los Municipios demandados y/o a las personas naturales y jurídicas e indeterminadas que se lleguen a vincular en tal calidad, a pagar a favor de la entidad ambiental CAR dentro del término prudencial que el Despacho determine, las sumas de dinero que pericialmente se lleguen a establecer por concepto de las tasas retributivas dejadas de pagar desde el 1 de enero de 1995 y/o desde la fecha que se llegue a determinar y hasta la fecha de la ejecutoria de la sentencia que ponga fin a esta acción popular y/o se apruebe el pacto de cumplimiento, en la proporción legal que les corresponde; para lo cual deberán tener en cuenta los peritos que se solicitan designar, lo expresamente establecido en el Decreto No. 1594 de 1984 del Ministerio de Salud, el Decreto 901 de 1997, y en las Resoluciones Nos. 273 de 1997 y 372 de 1998, del Ministerio del Medio Ambiente y demás normas concordantes.

Expediente No. 25000-23-27-000-2001-0479-01  
Acumulados Nos. 2000-0428, 2001-0122, 2001-0343  
Actor: GUSTAVO MOYA ÁNGEL Y OTROS  
Acción Popular

**QUINTO.** - Que se condene solidariamente a los demandados al pago de los daños y perjuicios ocasionados por la grave contaminación al medio ambiente y principalmente al río Funza o Bogotá, por los vertimientos domésticos e industriales que los Municipios demandados arrojan sin ningún tipo de tratamiento previo; sin contar con los permisos de vertimientos, ni de concesión de aguas y por cuanto las Entidades Territoriales demandadas no están pagando los tasas retributivas por la utilización de las aguas, las cuales están consagrados (sic) en la ley ambiental y fueron reglamentadas por el Gobierno Nacional, y además por la omisión de la Entidad Ambiental CAR, al no estar cobrándolas; indemnización en beneficio de la Entidad Ambiental CAR, al no estar cobrándolas; indemnización en beneficio de las personas directamente afectadas y/o a quienes lleguen a acreditar perjuicios y demostrarlos en concreto en esta acción pública, los cuales deberán ser establecidos por medio de peritos idóneos que solicito se designen a la fecha de ejecutoria de la sentencia que se profiera por parte del Despacho, en concordancia con lo establecido en el inciso primero del art. 34 de la Ley 472/98.

**SEXTO.** - Que se condene solidariamente a los demandados que resulten responsables, a pagar a favor de la parte actora los incentivos consagrados en la Ley, en razón de esta acción popular.

**SÉPTIMO.** - Que condene solidariamente a los demandados que resulten responsables al pago de las costas y gastos del proceso, si hubiere lugar a ello" (fls. 6 y 7, cdno. 1.3).

Expediente No. 25000-23-27-000-2001-0479-01  
Acumulados Nos. 2000-0428, 2001-0122, 2001-0343  
Actor: GUSTAVO MOYA ÁNGEL Y OTROS  
Acción Popular

## **II.**

### **ACTUACIONES DE LAS PERSONAS VINCULADAS AL PROCESO – CONTESTACIONES DE LA DEMANDA**

Notificadas del auto admisorio de la demanda, las personas vinculadas al proceso y contra quienes se dirigió el libelo inicial contestaron la demanda en los términos que se resumen a continuación:

#### **II.1. ACCIÓN POPULAR 25000-23-27-000-2001-90479-01**

**ACTOR: GUSTAVO MOYA ÁNGEL Y OTROS**

##### **II.1.1. LA EMPRESA DE ENERGÍA DE BOGOTÁ**

Admitió unos hechos y negó otros y, en suma, respondió que la empresa construyó el Embalse del Muña hace 50 años con el objeto de tener una reserva de agua para poderla utilizar en la medida que el caudal del río Bogotá, no fuera suficiente para la generación de energía en las plantas hidroeléctricas instaladas en el Salto, Laguneta y Mesitas del Colegio.

Adujo que la contaminación a que se refiere el demandante no es por causa del Embalse del Muña, sino por el agua del río Bogotá, el cual, 50 años después de construido el embalse, se ha convertido en una cloaca, producto de los residuos químicos que las fábricas y las industrias arrojan a su lecho, así como por las aguas negras de los alcantarillados de los distintos municipios por donde

Expediente No. 25000-23-27-000-2001-0479-01  
Acumulados Nos. 2000-0428, 2001-0122, 2001-0343  
Actor: GUSTAVO MOYA ÁNGEL Y OTROS  
Acción Popular

pasa, incluyendo las del Distrito Capital de Bogotá. Todo lo cual demuestra, 50 años después, que la construcción del embalse no es una acción reciente, sino el fruto de una planeación efectiva y funcional.

Con relación a la afirmación del actor sobre la no ejecución de obras para solucionar el problema, puso de presente que la E.E.B. en coordinación con el alcalde del Municipio de Sibaté, delegados de la Procuraduría General de la Nación y de la CAR, han realizado trabajos para buscar la descontaminación del agua que se toma del río y que es almacenada en el Embalse del Muña, como consta en la comunicación 3856683, que el jefe de la División de Protección Ambiental de la EEB, envió al asesor para Asuntos Agrarios de la Procuraduría General de la Nación, el 20 de Agosto de 1992.

El problema no son las aguas del Embalse del Muña, sino las aguas del río Bogotá, y tal recuperación debe ser propósito Nacional. La solución se logra tal como lo mencionó el accionante con el montaje de plantas purificadoras de las aguas del río Bogotá y que no son funciones de la E.E.B. Por consiguiente la E.E.B., no es directamente responsable y sin embargo el día 6 de diciembre de 1991, firmó con la CAR el Convenio No.5709, en cual ésta se comprometió a ejecutar los estudios, obras e interventoría para la reforestación y protección de los recursos naturales y del medio ambiente.

Como excepciones de mérito interpuso la que denomina como inexistencia de la obligación, basada en que de acuerdo

Expediente No. 25000-23-27-000-2001-0479-01  
Acumulados Nos. 2000-0428, 2001-0122, 2001-0343  
Actor: GUSTAVO MOYA ÁNGEL Y OTROS  
Acción Popular

con los literales d, e y f, de la Ley 3ª de 1961 es la CAR quien debe adelantar las obras pretendidas.

### **II.1.2. DISTRITO CAPITAL- DAMA**

El Director de la oficina de Asuntos Judiciales de la Secretaría General de la Alcaldía Mayor de Bogotá, en condición de representante judicial del Distrito Capital - Departamento Técnico Administrativo del Medio Ambiente DAMA, al contestar la demanda puso de presente que, de acuerdo con lo preceptuado en el artículo 35 del Decreto Ley 1421 de 1993, la representación judicial del mismo está en cabeza del Alcalde Mayor de Bogotá, quien en ejercicio de su función la delegó en dicha dirección, por lo que ni las secretarías ni los departamentos administrativos, tienen capacidad procesal para ser parte y comparecer al proceso, habida cuenta que no tienen personería jurídica, como es caso del Departamento Técnico Administrativo del Medio Ambiente "DAMA"(fls. 718 a 729).

Precisó que la Alcaldía Mayor de Bogotá, Distrito Capital, a través del Departamento Técnico Administrativo del Medio Ambiente cumple las funciones relacionadas con la protección del medio ambiente, dentro del perímetro urbano de la ciudad, zona esta distinta al Embalse del Muña.

En tal sentido, adujo que las pretensiones del actor van dirigidas a la protección y recuperación del Embalse del Muña, territorio sobre el que no tiene competencia el Distrito Capital, por lo que nada le consta en relación

Expediente No. 25000-23-27-000-2001-0479-01  
Acumulados Nos. 2000-0428, 2001-0122, 2001-0343  
Actor: GUSTAVO MOYA ÁNGEL Y OTROS  
Acción Popular

con los hechos que se le atribuyen a la E.E.B, y con respecto a la vinculación oficiosa que hiciera el Tribunal, expuso que si lo que se persigue es la descontaminación del río Bogotá, al no indicarse ningún tipo de responsabilidad por acción u omisión en el auto que lo vincula, se está invirtiendo el régimen de responsabilidad de la Administración, por ende la carga de la prueba.

Por lo anterior, propuso las excepciones de falta de legitimación en la causa por pasiva e improcedencia de la vinculación oficiosa del Distrito Capital, argumentando no es la parte llamada a responder por el objeto de la reclamación, pues carece del presupuesto y la competencia para intervenir en la preservación del Embalse del Muña, dado que su competencia por razón del territorio se circunscribe únicamente al perímetro urbano.

Con relación al tema de la contaminación del río Bogotá, señaló que de conformidad con el Acuerdo 19 de 1994 y el Decreto 673 del 8 de noviembre de 1995, es el DAMA la máxima autoridad ambiental dentro del perímetro urbano, sin embargo, resaltó que existe responsabilidad mancomunada de la colectividad, además de que en consonancia con el Acuerdo 06 del 8 de mayo de 1990 y según el PLAN DE ORDENAMIENTO TERRITORIAL PARA SANTAFÉ DE BOGOTÁ, adoptado mediante el Decreto 619 de 28 de julio de 2000, artículo 26 parágrafo 2º, es la Empresa de Acueducto y Alcantarillado la responsable de demarcar las rondas y zonas de manejo del Río.

Expediente No. 25000-23-27-000-2001-0479-01  
Acumulados Nos. 2000-0428, 2001-0122, 2001-0343  
Actor: GUSTAVO MOYA ÁNGEL Y OTROS  
Acción Popular

### **II.1.3. SECRETARÍA DE SALUD DE BOGOTÁ**

La Secretaría de Salud de Bogotá a través de apoderado, contestó la demanda en los mismos términos que el Distrito Capital acerca de su falta de capacidad para obrar en el proceso, la cual, señaló, radica en el Alcalde Mayor de Bogotá.

En cuanto al tema de sus funciones, invocó los artículos 12 de la Ley 10 de 1990, 35 del Acuerdo 1421 de 1993 y 3° del Acuerdo 06 de 1990, para indicar que en coordinación con la Empresa De Acueducto y Alcantarillado de Bogotá, controla la calidad del agua para consumo humano en el Distrito Capital, función que no extiende a los municipios aledaños.

Sostuvo que, de acuerdo con el artículo 8° del citado Acuerdo de 1996 los temas ambientales competen al DAMA, razón por la cual propuso como excepciones la falta de legitimación en la causa por pasiva y la falta de competencia.

### **II.1.4. EMGESA S. A. E.S.P.**

La empresa, obrando a través de apoderado, se opuso a las pretensiones de la acción popular por carecer de sustento fáctico y jurídico, además de argumentar que no realiza ningún tipo de vertimiento al Embalse del Muña, sino que su actividad consiste en trasvasar parcialmente las aguas del río Bogotá al embalse por medio de bombeo, con el fin exclusivo de usarlas en el proceso de generación de

Expediente No. 25000-23-27-000-2001-0479-01  
Acumulados Nos. 2000-0428, 2001-0122, 2001-0343  
Actor: GUSTAVO MOYA ÁNGEL Y OTROS  
Acción Popular

energía eléctrica en sus centrales, por tanto, lo que determina la existencia de impactos ambientales en la zona de influencia es la calidad del agua, cuyo deterioro tiene como causa los vertimientos directos de aguas residuales de Bogotá y Soacha, así como el impacto que recibe el Río a la altura del corredor de Villapinzón-Chocontá, donde convergen las aguas residuales producto del proceso de curtiembre de más de 160 tenerías, las descargas del río Negro y de algunas industrias que no disponen de sistema de tratamiento, y después de atravesar el Distrito Capital, las descargas de los ríos Juan Amarillo o Salitre, Fucha y Tunjuelo.

Agregó que después de recorrer 80 kilómetros, el río llega en iguales condiciones de contaminación al Puente Canoas (Alicachín), donde es trasvasado parcialmente al Embalse del Muña.

Finalmente, como excepciones de mérito propuso las que denominó uso apropiado y controlado de las aguas del río Bogotá, cumplimiento estricto de las disposiciones legales aplicables, manejo técnico de los impactos ambientales, inexistencia de evidencia científica de daño ambiental por parte de los demandantes y caducidad de la acción.

#### **II.1.5. CORPORACIÓN AUTÓNOMA REGIONAL DE CUNDINAMARCA -CAR-**

Por conducto de apoderado que al efecto constituyó, la Corporación afirmó haber iniciado procesos sancionatorios contra la mayoría de las empresas, y la implementación de

Expediente No. 25000-23-27-000-2001-0479-01  
Acumulados Nos. 2000-0428, 2001-0122, 2001-0343  
Actor: GUSTAVO MOYA ÁNGEL Y OTROS  
Acción Popular

programas para la recuperación del Embalse del Muña, con su respectivo seguimiento y control (fls. 1750-1754 c.p.No.3).

Como excepciones propuso la inexistencia del incumplimiento por omisión imputable a la -CAR- y la improcedencia de la acción popular en su contra.

#### **II.1.6. MUNICIPIO DE SIBATÉ**

Obrando a través de apoderado, en el escrito de contestación consideró que le fue notificada una demanda que relata hechos e invoca normas diferentes a las del procedimiento actual, esto es, la Ley 472 de 1998, razón por la cual le era imposible desvirtuar pretensiones que no tenían conducencia con el municipio, además de que ya había sido vinculado en una Acción Popular con radicado No. 00-0122, que se adelantaba en el despacho del Magistrado CARLOS ENRIQUE MORENO RUBIO, y respecto de la cual solicitó la acumulación para un mejor proveer.

Afirmó que se encontraba adelantando la contratación y el desarrollo de plantas de tratamiento de aguas residuales, tanto de la población como del matadero municipal.

#### **II.1.7. MUNICIPIO DE CHÍA**

Al contestar la demanda se opuso a las pretensiones de la misma, indicando que no era posible desvirtuar pretensiones que no tenían conducencia actual, y

Expediente No. 25000-23-27-000-2001-0479-01  
Acumulados Nos. 2000-0428, 2001-0122, 2001-0343  
Actor: GUSTAVO MOYA ÁNGEL Y OTROS  
Acción Popular

proponiendo como excepción el "errado rumbo procesal de la acción", con fundamento en tres hechos significativos:

1. Involucrar como parte pasiva al Municipio de Chía, a pesar de ser ajeno a la acción;
2. Desconocer las obligaciones a cargo de la CAR y de la E.E.B;
3. Asignar la responsabilidad solidaria de la E.E.B, la CAR, el Ministerio del Medio Ambiente y del Municipio de Sibaté.

Como excepción propuso la "ILEGITIMIDAD POR PASIVA DEL MUNICIPIO", argumentando que conforme a lo señalado por la oficina de Planeación Municipal de Chía, la laguna de oxidación con que cuenta esa localidad, está a cargo de la Corporación Autónoma Regional de Cundinamarca (Almeidas), entidad especializada en materia ambiental y de naturaleza supramunicipal.

Luego hizo referencia a las funciones que de acuerdo con la Ley 99 de 1993 le competen al Ministerio del Medio Ambiente, al Consejo Nacional Ambiental y a las Corporaciones Autónomas Regionales, para concluir que la contaminación de la Represa del Muña no es una problemática local, y en razón de ello bien pudo el Departamento de Cundinamarca intervenir de manera efectiva y anterior, conforme lo dispone el artículo 64 de la precitada ley.

Expediente No. 25000-23-27-000-2001-0479-01  
Acumulados Nos. 2000-0428, 2001-0122, 2001-0343  
Actor: GUSTAVO MOYA ÁNGEL Y OTROS  
Acción Popular

#### **II.1.8. MUNICIPIO DE FUNZA**

Al contestar la demanda, el ente territorial por conducto de su apoderado, manifestó que no ostenta la calidad de demandado, sino que concurre en razón de la citación que se hace de la referida pieza procesal.

Expuso que no es el causante de la contaminación del río Bogotá, pues desde su nacimiento, y de manera especial a partir del Municipio de Villapinzón, inicia su vertiginosa profanación, que resulta más gravosa en el recorrido de su cauce, llegando a dicha localidad ya no como un Río sino como una de las cloacas más contaminadas del universo, con lo cual no solo el Municipio de Sibaté resulta afectado, sino todos los ribereños del cauce, razón por la que manifestó coadyuvar la petición de la demanda en lo referente a la descontaminación no solo de la Laguna del Muña, sino también de toda la corriente hídrica, ordenando a todas las entidades particulares como oficiales, del orden nacional, departamental, municipal y distrital, hacer cesar los actos perturbatorios.

#### **II.1.9. MUNICIPIO DE SOPÓ**

Por conducto de su apoderado judicial, el ente territorial adujo que la demanda se funda en hechos y normas disímiles a las del procedimiento establecido en la Ley 472 de 1998, y agregó que le es imposible desvirtuar las pretensiones dado que no tienen conducencia con dicho municipio.

Expediente No. 25000-23-27-000-2001-0479-01  
Acumulados Nos. 2000-0428, 2001-0122, 2001-0343  
Actor: GUSTAVO MOYA ÁNGEL Y OTROS  
Acción Popular

Sostuvo que no tiene nada que ver con el Embalse del Muña, por lo cual propuso como excepción la falta de legitimación en la causa por pasiva, bajo el principio de legalidad de la actuación pública, según el cual a los servidores públicos sólo les es dado realizar los actos previstos en la Constitución, la Ley o los Reglamentos, es decir, no puede el ente territorial asumir responsabilidades ajenas a su jurisdicción y competencia.

Propuso la excepción de prescripción de la acción, argumentando que la construcción del Embalse del Muña había tenido lugar en el año de 1945, es decir, ya habían transcurrido más de 20 años de la ocurrencia de los hechos relacionados con el vertimiento de las aguas al Río Bogotá.

Asimismo como excepción la inexistencia de la obligación a cargo del municipio, indicando que según lo previsto en los literales d, e y f del artículo 4º de la Ley 3 de 1961, corresponde a la CAR realizar las obras que pretende el accionante, además la Ley 99 de 1993 establece que dicha entidad funge como autoridad ambiental, y como tal le compete el manejo ambiental y la ejecución de una estrategia integral de saneamiento de la cuenca del río Bogotá.

Por último puso de presente que viene dando manejo técnico y regulado a los impactos ambientales sobre las aguas vertidas al río Bogotá, razón por la cual no debe endilgársele responsabilidad directa por la contaminación de la fuente hídrica.

Expediente No. 25000-23-27-000-2001-0479-01  
Acumulados Nos. 2000-0428, 2001-0122, 2001-0343  
Actor: GUSTAVO MOYA ÁNGEL Y OTROS  
Acción Popular

#### **II.1.10. MUNICIPIO DE CHOCONTÁ**

El Alcalde Municipal obrando como representante legal del municipio, contestó la demanda oponiéndose a las pretensiones, al considerar que no tiene ninguna injerencia en el manejo y operación del Embalse del Muña, a diferencia de la Empresa de Energía Eléctrica de Bogotá (propietaria del embalse), el Distrito Capital (principal fuente de contaminación del río Bogotá), el Ministerio del Medio Ambiente, la CAR de Cundinamarca (de acuerdo con la Ley 99 de 1993 le corresponde promover acciones para controlar el problema ambiental a través de los diferentes instrumentos que la legalmente establecidos), el Departamento Administrativo de Planeación Nacional, la Gobernación de Cundinamarca y la Empresa de Acueducto y Alcantarillado de Bogotá; motivos que lo llevaron a proponer como excepción la inexistencia de la obligación en cabeza del municipio y a radicar la responsabilidad de la recuperación del Embalse del Muña, en cabeza de terceros.

#### **II.1.11. MUNICIPIO DE SOACHA**

En la contestación de la demanda, el apoderado del municipio propuso como excepción la INEXISTENCIA DE LA OBLIGACIÓN, argumentando que no es dicho ente territorial el responsable del almacenamiento y vertimiento de aguas negras al Embalse del Muña.

No obstante, expuso que el Alcalde Municipal ha venido actuando de manera efectiva en lo que tiene que ver con

Expediente No. 25000-23-27-000-2001-0479-01  
Acumulados Nos. 2000-0428, 2001-0122, 2001-0343  
Actor: GUSTAVO MOYA ÁNGEL Y OTROS  
Acción Popular

la problemática del río Bogotá, y la prueba de ello es que dentro del Plan de Ordenamiento Territorial (Acuerdo 046 de 2000) se proyectó la construcción de una planta de tratamiento de aguas residuales, para lo cual se dispuso un área en el sector rural (vereda Canoas). Además, dentro del Plan de Desarrollo 2001-2003 (Acuerdo No. 13 de 31 de mayo de 2001), en el componente relacionado con el Manejo, Protección y Recuperación de los Recursos Naturales y el Ambiente, se proponen cuatro estrategias consistentes en el fortalecimiento, reglamentación, gestión e investigación, con el objeto de lograr un verdadero equilibrio ecológico.

#### **II.1.12. MUNICIPIO DE VILLAPINZÓN**

Al pronunciarse sobre la acción popular, el apoderado judicial del municipio manifestó no oponerse a la prosperidad de los pedimentos de los accionantes, en relación con las empresas o entidades que pudieran llegar a tenerse como responsables del deterioro ambiental.

Expuso que en el Plan de Desarrollo, Esquema de Ordenamiento Territorial y Presupuesto del año 2002, el municipio se comprometió a desarrollar planes, programas y proyectos con el fin de evitar y restablecer eventuales daños ecológicos y ambientales, especialmente en el río Funza y la cuenca alta y sus afluentes.

Así las cosas, adujo que no puede imputársele omisión alguna o grado de responsabilidad al ente territorial por la contaminación ambiental de la región afectada, toda

Expediente No. 25000-23-27-000-2001-0479-01  
Acumulados Nos. 2000-0428, 2001-0122, 2001-0343  
Actor: GUSTAVO MOYA ÁNGEL Y OTROS  
Acción Popular

vez que ha adelantado diferentes proyectos encaminados a la recuperación del río Bogotá.

Adicionalmente, sostuvo que el municipio ha asumido una actitud diligente en relación con la mitigación del impacto ambiental, y por ello debe despacharse en forma desfavorable cualquier pretensión de la demanda que se quiera hacer extensiva a él.

#### **II.1.13. MUNICIPIO DE MADRID**

En el escrito de contestación de la demanda, el apoderado de la entidad territorial precisó que el municipio no está ubicado en la ribera del río Bogotá, por lo cual no debió notificársele de la demanda. En consecuencia, solicitó que el contradictorio fuera integrado por las entidades que conforman el SINA, entre otras, el Ministerio del Medio Ambiente y el Presidente de la República, quienes de conformidad con lo establecido en la Ley 99 de 1993, son los encargados de coordinar la política para la conservación del medio ambiente.

#### **II.1.14. MUNICIPIO DE FACATATIVÁ**

Llegado el momento de contestar la demanda, el municipio, obrando a través de apoderado, solicitó declarar la responsabilidad de la Empresa de Energía Eléctrica de Bogotá, por el daño grave que ha causado al medio ambiente y a los componentes del espacio público en dicho municipio, especialmente el oxígeno en los sectores de Santa Marta, como consecuencia de los vertimientos y el

Expediente No. 25000-23-27-000-2001-0479-01  
Acumulados Nos. 2000-0428, 2001-0122, 2001-0343  
Actor: GUSTAVO MOYA ÁNGEL Y OTROS  
Acción Popular

depósito de aguas negras en el Embalse del Muña, lo cual termina afectando la salud de la población, por lo cual consideró que debe ser recompensado a costa del querellado.

#### **II.1.15. MUNICIPIO DE ZIPAQUIRÁ**

Al contestar la acción impetrada, el municipio se opuso a la totalidad de las pretensiones, formuló la excepción de falta de legitimación en la causa por pasiva y sostuvo que la demanda se sustenta en hechos derivados de acciones u omisiones, en los que no ha participado.

Manifestó que el Embalse del Muña no está ubicado en jurisdicción de Zipaquirá, y por lo mismo, el municipio no tiene injerencia en su mantenimiento.

Adicionalmente propuso la excepción de inexistencia de la obligación a cargo del municipio, pues a su juicio, la entidad responsable de la protección y manejo de la cuenca del río Bogotá, es la Corporación Autónoma Regional de Cundinamarca "CAR", en calidad de autoridad ambiental.

No obstante, afirmó que la acción del municipio para la protección del medio ambiente y específicamente del río Bogotá, ha contemplado desde hace varios años programas puntuales para evitar la contaminación de los recursos hídricos, que junto con el control y vigilancia de la CAR, han disminuido el impacto ambiental.

Expediente No. 25000-23-27-000-2001-0479-01  
Acumulados Nos. 2000-0428, 2001-0122, 2001-0343  
Actor: GUSTAVO MOYA ÁNGEL Y OTROS  
Acción Popular

Finalmente, propuso la excepción de prescripción de la acción al considerar que de conformidad con los hechos y antecedentes, la acción instaurada en 1992 se encontraba prescrita, pues habían transcurrido más de veinte (20) años del proceso de vertimiento y almacenamiento de aguas en el Embalse del Muña.

#### **II.1.16. MUNICIPIO DE MOSQUERA**

Al contestar la demanda se opuso a las pretensiones de la acción popular por considerarlas ajenas al municipio, además de no tener el menor nexo con los hechos relatados en la demanda respecto del Embalse del Muña.

Adujo que la E.E.B. ha propiciado el bombeo de aguas contaminadas del río Bogotá al embalse, situación que resulta ajena a la voluntad del ente territorial, y al no existir inmediatez entre la causa y el efecto de los hechos aquí demandados, no hay lugar a endilgarle responsabilidad.

#### **II.1.17. ETERNIT COLOMBIANA S.A, LÍQUIDO CARBÓNICO COLOMBIANA S.A., CONALVIDRIOS S.A., REFISAL S.A., CERVECERÍA LEONA S.A., ALPINA S.A.**

Pese a ser representadas por un mismo apoderado, este se pronunció respecto de cada una de ellas, en los siguientes términos:

Expediente No. 25000-23-27-000-2001-0479-01  
Acumulados Nos. 2000-0428, 2001-0122, 2001-0343  
Actor: GUSTAVO MOYA ÁNGEL Y OTROS  
Acción Popular

**II.1.17.1. ETERNIT COLOMBIANA S.A., LIQUIDO CARBÓNICO COLOMBIANA S.A., CONALVIDRIOS S.A.**

Afirmó que la contaminación del Embalse del Muña no es consecuencia directa ni indirecta de la labor que sus poderdantes desarrollan, sino que procede, presuntamente, de la Empresa de Energía de Bogotá (EMGESA) por acción, con ocasión del *"bombeo y almacenamiento de aguas negras en el embalse"* provenientes del río Bogotá; y de la autoridad ambiental (CAR) por omisión, *"al permitir dicha actividad sin ejercer sus funciones de control y seguimiento"*, situación que no puede trasladarse a las empresas del sector.

Asimismo afirmó la imposibilidad de atribuir a sus representadas conductas negligentes o arbitrarias en materia de contaminación del Embalse del Muña, pues según dijo, en la actualidad no realizan vertimientos ni descargas de aguas o desechos allí, además de que tanto éstas como otras empresas, resultan afectadas por la contaminación de dicho embalse.

**II.1.17.2. REFINADORA DE SAL S.A. "REFISAL" y CERVECERÍA LEONA S.A.**

Aparte de hacer referencia a las mismas razones que adujo respecto de sus demás representadas, el señor apoderado indicó que no puede atribuírsele conducta negligente o arbitraria en materia de contaminación del Embalse del Muña a estas empresas, por cuanto sus instalaciones no se encuentran en las proximidades del mismo, y tampoco vierten ni descargan aguas o desechos allí, sumado a ello

Expediente No. 25000-23-27-000-2001-0479-01  
Acumulados Nos. 2000-0428, 2001-0122, 2001-0343  
Actor: GUSTAVO MOYA ÁNGEL Y OTROS  
Acción Popular

el acatamiento de las normas y requerimientos de la Corporación Autónoma Regional de Cundinamarca - CAR-.

**II.1.17.3. ALPINA PRODUCTOS ALIMENTICIOS S.A. "ALPINA"**

Señaló que las instalaciones de esta empresa no se encuentran en las proximidades del embalse y, en consecuencia, tampoco vierte ni descarga sus aguas o desechos en él. Además ha acatado las normas y requerimientos de la Corporación Autónoma Regional de Cundinamarca "CAR", en materia de vertimientos.

En cuanto al llamamiento en garantía, el apoderado de dichas empresas (ETERNIT COLOMBIANA S.A., LÍQUIDO CARBÓNICO COLOMBIANA S.A., CONALVIDRIOS, REFINADORA DE SAL S.A., CERVECERÍA LEONA S.A., ALPINA S.A.), estimó su improcedencia, por cuanto según la Ley 472 de 1998 en este caso no existe ni legal, ni contractualmente, un vínculo que ligue a los demandados iniciales con sus poderdantes, así como tampoco existe obligación de indemnizar con fundamento en la ley o en un contrato.

En tal sentido, precisó que no procede la vinculación de sus representadas como demandadas, por cuanto los elementos que configuran la responsabilidad en materia colectiva no se presentan y no existe un nexo de causalidad que ligue la actividad que desarrollan con la contaminación del embalse, ni mucho menos con la construcción y operación del mismo para generación eléctrica utilizando aguas del río Bogotá.

Planteó que debe estudiarse con cuidado el tema de la causa que origina la responsabilidad y frente a dicho

Expediente No. 25000-23-27-000-2001-0479-01  
Acumulados Nos. 2000-0428, 2001-0122, 2001-0343  
Actor: GUSTAVO MOYA ÁNGEL Y OTROS  
Acción Popular

estudio consideró que existirían dos posibles hipótesis: la primera entender que la causa de la contaminación del Embalse del Muña es la contaminación del río Bogotá, y la segunda, que la causa de la contaminación es la actividad de EMGESA al utilizar las aguas contaminadas del río Bogotá para procesos de generación eléctrica, producto de la omisión de las autoridades ambientales.

Finalmente, propuso respecto de sus poderdantes las siguientes excepciones: ausencia de legitimidad activa, conducta legítima de las demandadas, ausencia de daño ambiental, ausencia de nexo causal, responsabilidad de un tercero, falta de jurisdicción y competencia.

#### **II.1.18. ESPUMADOS S.A.**

Señaló su apoderado, que la sociedad está en capacidad de probar que no vierte al río Bogotá y mucho menos a la laguna del Muña, ninguna clase de aguas que pudieren afectar o contaminar el medio ambiente.

Precisó que ESPUMADOS S.A. no tiene la capacidad de efectuar la construcción de obras de infraestructura para atender la petición principal de la demanda, y por lo tanto, si la contaminación de la laguna es o ha sido responsabilidad de la Empresa de Energía Eléctrica de Bogotá D.C., es ella la llamada a responder.

Aseguró que no hay norma que obligue a una empresa particular, ni capital privado vinculado a empresa alguna que pueda enmendar la situación del daño ecológico causado al río Bogotá y la laguna del Muña, por tanto,

Expediente No. 25000-23-27-000-2001-0479-01  
Acumulados Nos. 2000-0428, 2001-0122, 2001-0343  
Actor: GUSTAVO MOYA ÁNGEL Y OTROS  
Acción Popular

solo el Estado en cumplimiento de los fines propuestos en la Constitución Política, está en capacidad de hacerlo.

Señaló además, que la regulación del saneamiento ambiental es un asunto que incumbe a la Nación y a cada una de sus entidades, en tanto que corresponde a ellas salvaguardar el interés general y procurar el mejoramiento de la calidad de vida de la población, como fines sociales del Estado.

Manifestó que ESPUMADOS S.A. paga por el vertimiento de sus aguas al alcantarillado del Municipio de Soacha, y no es su responsabilidad que éste realice actividades contaminantes.

En cuanto al llamamiento en garantía, precisó que resulta improcedente frente a su representada, toda vez que no existe ningún vínculo contractual ni legal para obligarla.

En ese orden de ideas, propuso las siguientes excepciones: carencia de competencia del tribunal para modificar la demanda, inexistencia de las obligaciones incoadas, falta de legitimación en la causa por pasiva, ausencia de nexo causal y prescripción.

#### **II.1.19. DISTRIBUIDORA TROPIABASTOS LTDA.**

Al pronunciarse sobre la demanda, su apoderado aseguró que la sociedad no es responsable por la contaminación del río Bogotá, pues no colinda con él y tampoco

Expediente No. 25000-23-27-000-2001-0479-01  
Acumulados Nos. 2000-0428, 2001-0122, 2001-0343  
Actor: GUSTAVO MOYA ÁNGEL Y OTROS  
Acción Popular

interviene en el mantenimiento de las aguas ni del río, ni del Embalse del Muña.

Manifestó que su representada no arroja ningún tipo de desecho al lecho del Río o de sus afluentes y tampoco procesa ningún tipo de materia prima química o productos alimenticios, puesto que su principal y único objeto social es la comercialización y distribución al por mayor y al detal, de toda clase de productos alimenticios procesados y de consumo para el hogar.

Con fundamento en dichos argumentos, afirmó que no existe ningún nexo causal para endilgar responsabilidad a su representada.

Adujo que la Acción Popular instaurada se encuentra prescrita, puesto que han transcurrido más de veinte años desde la ocurrencia de los hechos relacionados con el vertimiento y almacenamiento de las aguas.

Destacó que la contaminación del río Bogotá y del Embalse del Muña se presenta desde hace más de 35 años, y solo hasta finales del año 1990 la empresa se trasladó a las instalaciones que hoy ocupa.

En estos términos, propuso como excepciones la ausencia de legitimación en la causa por pasiva - ausencia de nexo o relación de causalidad-, caducidad de la acción y/o prescripción del derecho - responsabilidad de la obligación en cabeza de terceros-.

Expediente No. 25000-23-27-000-2001-0479-01  
Acumulados Nos. 2000-0428, 2001-0122, 2001-0343  
Actor: GUSTAVO MOYA ÁNGEL Y OTROS  
Acción Popular

**II.1.20. GRUPO SIDERÚRGICO DIACO S.A. - ANTES SIDERÚRGICA DE BOYACÁ S.A. (1007 a 1045, c. principal 2).**

Su apoderado contestó la demanda oponiéndose a cualquier declaración o condena en contra de la sociedad, toda vez que no es responsable de ninguno de los hechos que dieron lugar a la acción popular.

Adujo que la contaminación del Embalse del Muña se originó en el bombeo y almacenamiento de aguas provenientes del río Bogotá, decisión que inicialmente adoptó y llevó a la práctica la Empresa de Energía de Bogotá S.A. y que hoy mantiene EMGESA, quien es la única que tiene la potestad de realizar o suspender dicha actividad en el embalse.

Precisó que el proceso siderúrgico realizado por la sociedad que representa no genera contaminación alguna a los recursos hídricos, puesto que el agua solo es empleada como refrigerante y por tanto no sufre ninguna alteración, además que por tratarse de un sistema circular y cerrado, el agua utilizada recircula indefinidamente durante el proceso productivo.

Aseguró que durante el proceso de fabricación del acero, el GRUPO SIDERÚRGICO DIACO S.A. utiliza aguas provenientes de pozos subterráneos que emplea como refrigerantes y que hace recircular indefinidamente.

Asimismo afirmó que al finalizar el ciclo de cada proceso una parte de las aguas se evapora por las altas

Expediente No. 25000-23-27-000-2001-0479-01  
Acumulados Nos. 2000-0428, 2001-0122, 2001-0343  
Actor: GUSTAVO MOYA ÁNGEL Y OTROS  
Acción Popular

temperaturas de los materiales, mientras que la otra es almacenada en tanques para su posterior enfriamiento por medio de una torre y su reutilización.

Por lo anterior, manifestó que los exiguos vertimientos que hace la empresa al río Bogotá son únicamente los resultantes de las aguas lluvias, las cuales no sufren alteración por el proceso industrial y, por tanto, su llegada al Río no causa contaminación alguna.

Con fundamento en dichos argumentos, propuso las siguientes excepciones: inexistencia de hecho productor de daño que pueda imputársele, existencia de actos administrativos en firme que declaran la ausencia de conducta de la demandada como productora de contaminación ambiental, inexistencia de nexo causal entre la conducta del Grupo Siderúrgico DIACO S.A. y el daño alegado por el demandante, hecho exclusivo de terceros, inexistencia de solidaridad entre Grupo Siderúrgico DIACO S.A. y los llamados a este proceso, inexistencia de obligación legal o contractual exigible que justifique el llamamiento en garantía.

#### **II.1.21. STANTON & CÍA S.A.**

Por conducto de su apoderado contestó la demanda oponiéndose a las pretensiones, al considerar que la contaminación del Embalse del Muña ha llegado a los grados actuales, por la conducta habitual de bombear y almacenar allí las aguas del río Bogotá, actividad que inicialmente ejecutó la Empresa de Energía Eléctrica de

Expediente No. 25000-23-27-000-2001-0479-01  
Acumulados Nos. 2000-0428, 2001-0122, 2001-0343  
Actor: GUSTAVO MOYA ÁNGEL Y OTROS  
Acción Popular

Bogotá y posteriormente continuo EMGESA SA. E.S.P., durante casi 50 años.

Sostuvo que si bien es cierto que las instalaciones industriales de la empresa están ubicadas cerca del Embalse del Muña, tal circunstancia no puede servir para acusarla de ser un agente activo de su contaminación, pues está ubicada en áreas destinadas a la actividad industrial (fl. 1176, c. principal No. 2).

Manifestó igualmente que la materia prima es manejada cuidadosamente durante el proceso productivo a efectos de lograr el mayor grado de utilización de la misma, razón por la cual los desechos son reutilizados según sus características, logrando que se origine la menor cantidad posible de residuos sólidos durante el proceso de producción, los cuales no han sido, ni son depositados en el embalse, pues son retirados de la planta por terceras personas que los compran para reutilizarlos en fines diferentes a los de la sociedad que representa, mientras que los restantes son enviados a los rellenos sanitarios legalmente autorizados para recibirlos.

Indicó que el proceso industrial se lleva a cabo mediante el abastecimiento de aguas que no provienen del embalse, sino de un pozo profundo perforado en las instalaciones de la empresa y debidamente autorizado por la autoridad ambiental competente, el cual es utilizado como refrigerante y para la producción de calor, permitiendo la reutilización de las aguas en forma casi indefinida y sin que se produzcan vertimientos al embalse.

Expediente No. 25000-23-27-000-2001-0479-01  
Acumulados Nos. 2000-0428, 2001-0122, 2001-0343  
Actor: GUSTAVO MOYA ÁNGEL Y OTROS  
Acción Popular

Adujo que su representada ha dado cumplimiento a las normas ambientales, y que el hecho de que el EMBALSE haya sobrepasado su capacidad de carga y no pueda realizar su propia auto depuración, no es responsabilidad suya, pues la contaminación obedece al vertimiento de diversos factores que se han venido acrecentando con el paso del tiempo.

Finalmente, y a título de excepciones precisó que STANTON & CÍA S.A. no ha realizado en el pasado ni en el presente actividades contaminantes del Embalse del Muña, además que durante el tiempo en el cual ha desarrollado su actividad ambiental ha desplegado una conducta diligente frente al medio ambiente y ha actuado con responsabilidad ambiental.

#### **II.1.22. EMPRESA COLOMBIANA DE CABLES S.A. - EMCOCABLES EN REESTRUCTURACIÓN**

En principio la apoderada judicial propuso la nulidad por indebida notificación, debido a que al representante de la sociedad le fue entregada la demanda sin anexos, sumado a ello que fue notificado del llamamiento en garantía ni de la acumulación de los procesos.

Asimismo afirmó la ausencia de responsabilidad de su representada por la contaminación del Embalse del Muña, pues la empresa se encuentra ubicada en el Municipio de Cajicá, a más de sesenta kilómetros del embalse, y solo entró en completa operación en 1999, es decir, ocho años después de que la presente acción fuera instaurada.

Expediente No. 25000-23-27-000-2001-0479-01  
Acumulados Nos. 2000-0428, 2001-0122, 2001-0343  
Actor: GUSTAVO MOYA ÁNGEL Y OTROS  
Acción Popular

Agregó que la sociedad EMCOCABLES S.A. no ha vertido ni descargado aguas o desechos en el Embalse del Muña, pues utiliza un sistema de circuito cerrado para las aguas derivadas de su proceso productivo, para lo cual cuenta con una sofisticada planta de tratamiento de aguas industriales de alta tecnología, sistema que, dice, fue aprobado por la -CAR-, al igual que el tratamiento de las aguas domésticas a través de piscinas de oxidación.

Como excepciones propuso las siguientes: cumplimiento de los deberes propios de la empresa en materia ambiental, ausencia de daño ambiental, ausencia de nexo causal, causa extraña, hecho de un tercero, conducta lícita de la empresa e improcedencia de la acción.

#### **II.1.23. INDUSTRIAS SPRING S.A.**

El apoderado de la sociedad Industrias Spring S.A., manifestó que su representada no vierte ni almacena aguas negras en el Embalse del Muña, pues no tiene contacto alguno con ésta. Además indicó que lo discutido en la acción popular es la contaminación del embalse, más no del río Bogotá.

Como excepciones propuso: falta de jurisdicción, falta de legitimación en la causa por pasiva, relación de causalidad y responsabilidad de un tercero.

#### **II.1.24. PAPELES Y CORRUGADOS ANDINA S.A., ANTES PAPELES Y MOLINOS S.A.**

A través de apoderado contestó la demanda, indicando que la Corporación Autónoma Regional -CAR-, está obligada a

Expediente No. 25000-23-27-000-2001-0479-01  
Acumulados Nos. 2000-0428, 2001-0122, 2001-0343  
Actor: GUSTAVO MOYA ÁNGEL Y OTROS  
Acción Popular

aplicar el procedimiento dispuesto para determinar la meta de reducción de la carga contaminante cada cinco años, a mantener una conducta diligente y eficiente en razón de su función de ejercer control de los vertimientos sobre los cuerpos de agua de ubicados dentro de su jurisdicción y, a responder frente a terceros cuando las industrias que vierten sus aguas han establecido los sistemas de tratamiento requeridos por ella requeridos.

De igual forma indicó que PAPELES & MOLINOS S.A. tiene un caudal de vertimiento máximo de 7.4 Ips, pero se debe tener en cuenta que en condiciones normales de operación no se está realizando vertimiento de aguas residuales al río Bogotá, pues en general, el sistema de producción está trabajando cerrado, sin vertimientos, aunque ocasionalmente resulta necesario realizar descargas al Río.

Precisó que la ubicación de su representada en el Municipio de Sesquilé, permite establecer que si bien la industria efectúa vertimientos puntuales en el Bogotá, estos son depositados en un tramo anterior al punto en donde capta sus aguas, tal como lo establecen las normas y la autoridad ambiental competente, sumado a ello que el manejo dado a las aguas residuales se relaciona con un sistema de tratamiento a través de un filtro de doble malla, procedimiento que explicó en forma detallada.

Consideró que el demandante debe probar específicamente, cuáles son los daños ciertos atribuibles de manera directa a la sociedad PAPELES Y CORRUGADOS ANDINA S.A.,

Expediente No. 25000-23-27-000-2001-0479-01  
Acumulados Nos. 2000-0428, 2001-0122, 2001-0343  
Actor: GUSTAVO MOYA ÁNGEL Y OTROS  
Acción Popular

pues ésta ha tomado todas las medidas necesarias en materia ambiental.

#### **II.1.25. PROTEÍNAS Y ENERGÉTICOS DE COLOMBIA S.A. - PROTEICOL S.A.**

Al pronunciarse sobre la acción popular, el apoderado de la sociedad se opuso a que las decisiones de fondo en este proceso fueran dirigidas en contra de su representada, puesto que, si bien PROTEICOL S.A. realiza vertimientos al Río, lo hace dentro de unos niveles aceptables definidos por la ley, y supervisados por la CAR.

Aseguró que periódicamente realizan análisis de laboratorio de sus aguas residuales, y adicionalmente el agua utilizada por la empresa en su proceso productivo, es extraída de un pozo profundo.

Sostuvo que cuando el Río pasa por las instalaciones de PROTEICOL en la jurisdicción de Sibaté, sus aguas ya vienen con un elevado grado de contaminación, producto de su paso por la ciudad.

Afirmó además, que tanto la Empresa de Energía Eléctrica de Bogotá como EMGESA, han sido las causantes y responsables directas del daño ambiental ocasionado por el vertimiento de aguas del río Bogotá al embalse, a través del sistema de bombeo (fls. 1401 del C. No. 2).

Por último, propuso las siguientes excepciones: inexistencia de la relación causa efecto entre sus

Expediente No. 25000-23-27-000-2001-0479-01  
Acumulados Nos. 2000-0428, 2001-0122, 2001-0343  
Actor: GUSTAVO MOYA ÁNGEL Y OTROS  
Acción Popular

actividades y los hechos de la demanda, y falta de jurisdicción.

## **II.2. ACCIÓN POPULAR AP-No.00-428**

**ACTOR: JORGE ENRIQUE CUERVO RAMÍREZ**

### **II.2.1. DISTRITO CAPITAL DEPARTAMENTO ADMINISTRATIVO DEL MEDIO AMBIENTE -DAMA**

El Director de Asuntos Judiciales de la Secretaría General de la Alcaldía Mayor de Bogotá, recalcó que en el acápite de los hechos el accionante no menciona al Departamento Administrativo del Medio Ambiente -DAMA-, como autoridad omisiva, teniendo en cuenta que es la máxima autoridad ambiental en el perímetro urbano.

Expuso que la competencia del DAMA cuenta con un amplio desarrollo normativo a nivel nacional, acorde con las necesidades de la ciudad, conforme lo dispuesto en los Acuerdos No. 19 de 1994 (fl. 60 c.p. No. 1.2), 9 de 1990 (fl.61 c.p. No.1.2) y 6 de 1990 (fl. 61 c.p. No. 1.2).

Adicionalmente trajo a colación las normas, proyectos y programas expedidos por el DAMA:

1. LA RESOLUCIÓN NO. 1074 DE 1997: relativo a límites permisibles para vertimientos en el alcantarillado y cuerpos de agua dentro de la jurisdicción de la misma. (fl. 62 c.p. No. 1.2)
2. LA RESOLUCIÓN 1558 DE 1998: atiende a adoptar metas de reducción de carga contaminante (fl. 63 c.p. No. 1.2).

Expediente No. 25000-23-27-000-2001-0479-01  
Acumulados Nos. 2000-0428, 2001-0122, 2001-0343  
Actor: GUSTAVO MOYA ÁNGEL Y OTROS  
Acción Popular

3. LA RESOLUCIÓN 339 DE 1999: con el propósito de optimizar los recursos económicos, humanos destinados al tema del vertimiento.
4. PROYECTOS DE CONSTRUCCIÓN DE LAS PLANTAS DE TRATAMIENTO DEL SALITRE, FUCHA Y TUNJUELITO, logrando la carga contaminante del río de Bogotá a través de los ríos Juan Amarillo, Fucha y Tunjuelito.
5. PROGRAMA DE PARTICIPACIÓN COMUNITARIA: en la recuperación de las quebradas del Distrito para la arborización de la ronda del río Tunjuelito, para los parques y humedales, así como para el parque lineal Molinos Córdoba - Juan Amarillo - Jaboque, entre otros (fls. 63-78 c.p. No. 1.2).

#### **II.2.2. EMPRESA DE ACUEDUCTO Y ALCANTARILLADO DE BOGOTÁ "E.A.A.B- E.S.P."**

El apoderado de la -E.A.A.B.-E.S.P., consideró que la normatividad vigente en materia ambiental establece parámetros y pagos de una tasa retributiva y aclaró, que no prohíbe el vertimiento de las aguas residuales a ríos o quebradas, ni tampoco, ha utilizado los ríos como receptores o conductores de aguas servidas, ya que no es la autoridad encargada de autorizar o prohibir vertimientos y actualmente no tiene toda la infraestructura de alcantarillado, en especial la intercepción de aguas residuales, conforme con lo establecido en la Ley 142 de 1994 (fls. 86-88 c.p. No. 1.2).

Expediente No. 25000-23-27-000-2001-0479-01  
Acumulados Nos. 2000-0428, 2001-0122, 2001-0343  
Actor: GUSTAVO MOYA ÁNGEL Y OTROS  
Acción Popular

Relacionó además las obras ejecutadas en el Programa Santa Fe I, iniciado con recursos del Banco Mundial, el cual busca dentro del Distrito Capital, la recuperación de cuencas y subcuencas de los ríos, redes troncales, rehabilitación del sistema de alcantarillado, protección de humedales, entre otros.

Propuso la excepción de cosa juzgada argumentando que los hechos que sirven de base a las pretensiones, como éstas, fueron discutidos en la Acción Popular promovida por la señora Luz Carmen Ramírez y otros, cuya sentencia fue por el Tribunal Administrativo de Cundinamarca el 16 de febrero de 2001, y confirmada por el Consejo de Estado en sentencia de 5 de junio de ese mismo año (fls. 170 a 207. c.I.2.).

### **II.3. ACCIÓN POPULAR AP-No.01-122**

**ACTOR: MIGUEL ÁNGEL CHAVES GARCÍA y JORGE  
HUMBERTO GONZÁLEZ**

#### **II.3.1. DEPARTAMENTO NACIONAL DE PLANEACIÓN -DAP**

Invocó su apoderado, que el DAP carece de competencia para ejecutar acciones de saneamiento ambiental, solicitó que se le excluya por falta de legitimación en la causa petendi y, subsidiariamente, que no se declare responsable directa ni solidariamente del desequilibrio ecológico, ni condenado a reparar el daño ambiental y perjuicios reclamados.

Expediente No. 25000-23-27-000-2001-0479-01  
Acumulados Nos. 2000-0428, 2001-0122, 2001-0343  
Actor: GUSTAVO MOYA ÁNGEL Y OTROS  
Acción Popular

### **II.3.2. MINISTERIO DE SALUD**

El Jefe de la Oficina Jurídica de este Ministerio, afirmó que en virtud del Decreto 1152 de 1999, como órgano del nivel Nacional, le fueron asignadas funciones enmarcadas en la Ley 9 de 1993 y la Ley 9 de 1979, relativas a los riesgos que para la salud humana implica la contaminación ambiental.

Manifestó que en relación con los trastornos de la salud, no se ha establecido científicamente el nexo causal con la contaminación ambiental, por tanto, consideró conveniente establecer la causa-efecto específica, asunto que por ser de orden local, corresponde a la Dirección Territorial de Salud.

### **II.3.3. DEPARTAMENTO DE CUNDINAMARCA**

Solicitó ser exonerado de responsabilidad, de conformidad con las funciones establecidas en la Ley 99 de 1993, por cuanto ha promovido y ejecutado proyectos, políticas y acciones en las cuencas de algunos afluentes del río Bogotá.

Señaló que por conducto de la Secretaría de Salud, ejerce vigilancia sobre las actividades de fumigación que la Empresa de Energía de Bogotá -hoy EMGESA S.A.- realiza en el sector del Embalse del Muña, agregando que viene realizando mesas de trabajo interinstitucionales denominadas "PLAN DE VIDA MUÑA 2000".

Expediente No. 25000-23-27-000-2001-0479-01  
Acumulados Nos. 2000-0428, 2001-0122, 2001-0343  
Actor: GUSTAVO MOYA ÁNGEL Y OTROS  
Acción Popular

Manifestó que la contaminación del Bogotá obedece a la ausencia de tratamiento de las aguas por parte del Distrito, por lo tanto, consideró que para afrontar la problemática deben aunarse esfuerzos logísticos y económicos por parte del Departamento, la Nación, la CAR, la Administración Municipal, la comunidad, los entes privados involucrados y la Empresa Generadora de Energía Eléctrica S.A. o quien haga sus veces.

#### **II.3.4. MINISTERIO DE HACIENDA Y CRÉDITO PÚBLICO**

Por intermedio de su apoderado, adujo que los hechos que sirven de sustento a la acción son ajenos a su competencia funcional y legal, por lo que asumir lo contrario lo llevaría a infringir la Constitución Política y la Ley, por extralimitación y ejecución de funciones distintas a las que le fueron asignadas (fl. 84 c.p. I.1.).

Asimismo, indicó que desde el punto de vista presupuestal tampoco le podría asistir responsabilidad, por cuanto las apropiaciones en cada órgano de la administración deben estar relacionadas con su objeto y funciones, además de que deben ser ejecutadas conforme al fin para el cual fueron programadas (artículo 18 del Decreto No. 111 de 1996, por el cual se compilan las Leyes 38 de 1989, 179 de 1994 y 225 de 1995 que conforman el Estatuto Orgánico del Presupuesto).

Expediente No. 25000-23-27-000-2001-0479-01  
Acumulados Nos. 2000-0428, 2001-0122, 2001-0343  
Actor: GUSTAVO MOYA ÁNGEL Y OTROS  
Acción Popular

### **II.3.5. MINISTERIO DE EDUCACIÓN NACIONAL**

A través de apoderado, estableció que dentro del marco de la descentralización y de la autonomía, la Ley 115 de 1994 en sus artículos 76 al 79 (Ley general de Educación), confiere autonomía a cada institución educativa para estructurar su currículo y plan de estudios, por lo tanto, corresponde a cada Secretaría de Educación Departamental y a cada Municipio enfocar los programas de Educación Ambiental, como un Proyecto Ambiental Escolar (PRAE), no como asignatura.

En cuanto al estudio técnico y científico de la contaminación de la Represa del Muña, adujo que la encargada de ello, es la Corporación Autónoma Regional de Cundinamarca -CAR-.

### **II.3.6. EMGESA S.A. E.S.P.**

Respondió oponiéndose a las pretensiones de la Acción Popular, y respecto de las excepciones y pruebas solicitadas, precisó que se remitía a las requeridas en la acción popular AP-01-00479, instaurada por el señor GUSTAVO MOYA ANGEL.

### **II.3.7. MINISTERIO DE DESARROLLO ECONÓMICO**

Su apoderado indicó que la entidad no tiene competencias relacionadas con la inspección, vigilancia y control de los vertimientos realizados al río Bogotá y el Embalse

Expediente No. 25000-23-27-000-2001-0479-01  
Acumulados Nos. 2000-0428, 2001-0122, 2001-0343  
Actor: GUSTAVO MOYA ÁNGEL Y OTROS  
Acción Popular

del Muña, y tampoco funciones de carácter policivo-ambiental preventivas o correctivas.

#### **II.3.8. EMPRESA DE ACUEDUCTO Y ALCANTARILLADO DE BOGOTÁ E.A.A.B. -E.S.P.**

El apoderado de la empresa afirmó que no es ella la encargada de la operación y mantenimiento de la estación de bombeo.

Agregó que por utilizar directa o indirectamente el agua como receptor de vertimientos puntuales, la empresa paga a la CAR la tasa retributiva establecida en artículo 42 de la Ley 99 de 1993 y el Decreto 901 de 1997.

Puso de presente que en el año de 1996, dio inicio al PROGRAMA SANTA FE I financiado con recursos del Banco Mundial por valor de \$ 476 millones de dólares, con el objeto de lograr el saneamiento básico de las cuencas de los 6 ríos (folio 217), las subcuencas del Tunjuelito, la construcción de redes troncales y secundarias, la rehabilitación del sistema de alcantarillado, el programa de protección de humedales, la rehabilitación de las zonas de ronda y del espacio público, el control de crecientes mediante la adecuación hidráulica de canales y quebradas, así como el control de inundaciones en las cuencas de los ríos Torca, Guaymaral, Salitre, Jaboque y Tintal.

Expediente No. 25000-23-27-000-2001-0479-01  
Acumulados Nos. 2000-0428, 2001-0122, 2001-0343  
Actor: GUSTAVO MOYA ÁNGEL Y OTROS  
Acción Popular

### **II.3.9. MINISTERIO DE MINAS Y ENERGÍA**

A través del apoderado que para el efecto constituyó, reiteró su oposición a las pretensiones de la acción popular, pues considera que la entidad no ha causado daño o amenaza a los derechos colectivos.

Adicionalmente, propuso de nuevo la excepción de falta de legitimidad en la causa por pasiva, argumentando que no puede imputarse a la entidad acción u omisión frente a la presunta violación de los derechos invocados.

### **II.3.10. CORPORACIÓN AUTÓNOMA REGIONAL DE CUNDINAMARCA-CAR**

Señaló que descarta toda responsabilidad en la acción interpuesta y que interviene como máxima autoridad ambiental, no como promotora de obra de recuperación pues ello corresponde a la E.E.B, de acuerdo con lo establecido en la Ley 56 respecto de las transferencias del sector eléctrico.

### **II.3.11. MINISTERIO DEL MEDIO AMBIENTE**

Por intermedio de su apoderado, adujo no tener competencia respecto de los hechos, actos, acciones u omisiones planteadas en la Acción Popular.

Afirmó que de acuerdo con la Ley 99 de 1993, el Ministerio es el ente rector del sector ambiental, no obstante, la administración y manejo de los recursos naturales renovables y del medio ambiente se encuentra a

Expediente No. 25000-23-27-000-2001-0479-01  
Acumulados Nos. 2000-0428, 2001-0122, 2001-0343  
Actor: GUSTAVO MOYA ÁNGEL Y OTROS  
Acción Popular

cargo de las CAR, según lo dispuesto en los artículos 23, 30 y 31 de la referida Ley 99.

#### **II.3.12. INSTITUTO DE HIDROLOGIA, METEOROLOGÍA Y ESTUDIOS AMBIENTALES - IDEAM**

Al manifestarse sobre la acción instaurada, el apoderado de la entidad consideró que la acusación que se le hace, es indeterminada y sin ningún sustento material o conocimiento de sus funciones, que son de carácter eminentemente científico y técnico, dada su calidad de organismo asesor, encargado del manejo, obtención, procesamiento y divulgación de la información relacionada con los recursos naturales de la Nación.

Comentó que debe existir una articulación entre las funciones suyas y las asignadas a las demás autoridades ambientales del SISTEMA NACIONAL AMBIENTAL, lo cual encuentra sustento en el artículo 15 de la Ley 99 de 1993.

Por último, expuso que el IDEAM cuenta con datos que corresponden a 4 puntos de muestreo sobre el Río Bogotá en el tramo Soacha-Tocaima, en donde recibe el impacto de las descargas de aguas del embalse, pese a que es obligación de las autoridades ambientales regionales, realizar este tipo de monitoreo sobre los cuerpos de agua específicos.

Expediente No. 25000-23-27-000-2001-0479-01  
Acumulados Nos. 2000-0428, 2001-0122, 2001-0343  
Actor: GUSTAVO MOYA ÁNGEL Y OTROS  
Acción Popular

### II.3.13. MUNICIPIO DE SOACHA

Manifestó a través de su apoderado, ser el más afectado por la contaminación del río Bogotá, pues al tratarse del último Municipio de la Cuenca Media, el Río llega allí con la desechos que acumula a lo largo de su recorrido en los municipios de Villapinzón, Chocontá, Suesca, Sesquilé, Gachancipá, Tocancipá, Zipaquirá, Cajicá, Nemocón, Chía, Cota y el Distrito Capital de Bogotá, sin que exista ningún tipo de tratamiento de las aguas residuales vertidas.

Resaltó que *"no puede asumir toda la responsabilidad, ni comprometerse en la recuperación de este recurso hídrico, si no existe compromiso de los demás municipios y la participación del Departamento y la Nación"*.

Adujo que no participó en la decisión sobre el trasvase de las aguas, pues la misma fue adoptada *"en su época por el -INDERENA"*.

Con relación a los vertimientos al río Soacha, manifestó que dada la magnitud de la inversión, es la Gobernación de Cundinamarca la encargada de la construcción de los interceptores margen izquierda y derecha, no el municipio.

Agregó que la Empresa de Acueducto de Bogotá, subsidia totalmente a la población el servicio, promoviendo con ello la expansión acelerada de las zonas subnormales, *"hasta la saturación que a mediano plazo puede ocasionar*

Expediente No. 25000-23-27-000-2001-0479-01  
Acumulados Nos. 2000-0428, 2001-0122, 2001-0343  
Actor: GUSTAVO MOYA ÁNGEL Y OTROS  
Acción Popular

*una crisis financiera y social en el Municipio de Soacha, pues no existen alternativas confiables de suministros para el total de la población".*

Por último, afirmó que en el Plan de Ordenamiento Territorial "POT", se contemplaron las soluciones al problema de alcantarillado, de lo cual hizo un recuento detallado.

#### **II.3.14. MINISTERIO DE AGRICULTURA Y DESARROLLO RURAL**

Contestó la demanda por conducto de su apoderado, quien propuso la excepción de falta de legitimación como parte pasiva, argumentando que dicha entidad no puede ni debe asumir responsabilidad alguna por hechos u omisiones en los que no ha tenido injerencia.

#### **II.3.15. SOCIEDAD BOGOTANA DE AGUAS Y SANEAMIENTO SUEZ -LYONNAISE DES EAUX- DEGREMONT E.S.P. S.A.**

Se pronunció sobre la demanda a través de su apoderado judicial proponiendo las excepciones de falta de legitimación en la causa por pasiva y ausencia del nexo de causalidad entre la actividad de su representada y la contaminación del Embalse del Muña, toda vez que dicha sociedad se encontraba ejecutando un contrato de concesión que tenía por objeto el tratamiento de las aguas residuales del Distrito Capital, a través de las plantas de "El Salitre, Fucha y Tunjuelito", con lo cual queda desvirtuada la amenaza o violación de los derechos colectivos que se invocan en la presente acción.

Expediente No. 25000-23-27-000-2001-0479-01  
Acumulados Nos. 2000-0428, 2001-0122, 2001-0343  
Actor: GUSTAVO MOYA ÁNGEL Y OTROS  
Acción Popular

En tal sentido, adujo que la vinculación de su representada, no dependió de una acción u omisión atribuible a ella, sino al contrato de concesión que viene ejecutando con el Distrito Capital, y por lo tanto no le pueden ser impuestas obligaciones distintas a las adquiridas contractualmente, o en su defecto, la modificación del contrato a través de una Acción Popular, pues ello implica desconocer el principio de legalidad del contrato.

#### **II.3.16. BENEFICENCIA DE CUNDINAMARCA**

Señaló su apoderado, que la entidad no es responsable, por acción u omisión, de la contaminación de la Represa del Muña, como tampoco es el ente responsable del control necesario para la protección del medio ambiente, pues las funciones que legalmente le han sido atribuidas se basan, principalmente, en el servicio social y de salud.

#### **II.3.17. COADYUVANCIA DE LA DEFENSORÍA DEL PUEBLO REGIONAL CUNDINAMARCA**

Se refirió a las aseveraciones de los accionantes sobre la existencia de un desequilibrio y un grave daño ecológico ambiental a la Represa del Muña, con ocasión de los vertimientos efectuados por el sistema de bombeo de las aguas negras del río Bogotá sin ningún tipo de tratamiento previo, para concluir que esa es la causa de los perjuicios graves al medio ambiente y a los cuerpos de agua que alimentan el río Muña y Aguas Claras, y que conducen al desaparecimiento de la flora y la fauna

Expediente No. 25000-23-27-000-2001-0479-01  
Acumulados Nos. 2000-0428, 2001-0122, 2001-0343  
Actor: GUSTAVO MOYA ÁNGEL Y OTROS  
Acción Popular

acuática en la represa, a la contaminación del suelo y el aire, y a la afectación de la salud de los habitantes de esa jurisdicción.

Su intervención en el proceso fue admitida mediante auto de 9 de julio de 2001 (fl. 677, c.I.1.).

### **II.3.18. MUNICIPIO DE SIBATÉ Y DISTRITO CAPITAL**

Contestaron la demanda por fuera de la oportunidad procesal establecida.

### **II.4. ACCIÓN POPULAR AP-No.01-343**

**ACTOR: MIGUEL ÁNGEL CHÁVEZ GARCÍA, JORGE HUMBERTO GONZÁLEZ, Y NICOLÁS DÍAZ ROA**

#### **II.4.1. MINISTERIO DE AGRICULTURA Y DESARROLLO RURAL**

Allegó la contestación de la demanda en los mismos términos de la Acción Popular 00-0122.

#### **II.4.2. MINISTERIO DEL MEDIO AMBIENTE**

El apoderado judicial del Ministerio, adujo que no es autoridad ambiental competente para conocer de los vertimientos de aguas residuales domésticas e industriales al río Bogotá, pues de acuerdo con los artículo 2, 5, 23, 30 y 31 de la Ley 99 de 1993 y los artículos 7 y 8 del Decreto 1753 de 1994, dicha función

Expediente No. 25000-23-27-000-2001-0479-01  
Acumulados Nos. 2000-0428, 2001-0122, 2001-0343  
Actor: GUSTAVO MOYA ÁNGEL Y OTROS  
Acción Popular

le compete directamente a la CAR, como administradora de los recursos naturales renovables y el medio ambiente.

Añadió que el Ministerio del Medio Ambiente es el organismo rector de la gestión del medio ambiente y de los recursos naturales renovables en Colombia, pero no un órgano ejecutor sino de gestión, encargado de fijar las políticas sobre la protección de dichos recursos, que serán aplicadas por las demás autoridades ambientales, en razón de ello propuso la excepción de falta de legitimación en la causa por pasiva.

#### **II.4.3. MINISTERIO DE SALUD**

La Jefe de la Oficina Jurídica del Ministerio refirió en su escrito, la normatividad relacionada en el proceso AP-00-0122 referente a las competencias de orden nacional y local, y los riesgos que para la salud humana acarrea la contaminación ambiental.

Expuso que el Ministerio diseñó el Plan de Atención Básica "P.A.B" de la Salud Pública, que además de ajustarse a las particularidades de cada territorio, es de carácter gratuito, obligatorio y de cobertura universal.

Añadió que atendiendo a las disposiciones constitucionales y legales, ha coordinado con los diferentes entes territoriales los lineamientos para el Plan de Atención Básica "P.A.B."

Expediente No. 25000-23-27-000-2001-0479-01  
Acumulados Nos. 2000-0428, 2001-0122, 2001-0343  
Actor: GUSTAVO MOYA ÁNGEL Y OTROS  
Acción Popular

#### **II.4.4. MINISTERIO DE DESARROLLO ECONÓMICO**

A través del apoderado manifestó que la causa del impacto negativo son los vertimientos domésticos e industriales que son arrojados al río Bogotá sin ningún tipo de tratamiento.

Adujo no ser causante, por acción u omisión de acto alguno que viole o pretenda violar derechos colectivos.

Destacó que de acuerdo con el numeral 12 del artículo 1º de la Ley 99 de 1993, el manejo ambiental del país es descentralizado, democrático y participativo, y en tal sentido el artículo 4 ibídem, para efectos de jerarquía del Sistema General Ambiental "SINA", menciona en forma descendente al Ministerio del Medio Ambiente, las Corporaciones Autónomas Regionales, los Departamentos Distritos y Municipios.

#### **II.4.5. MINISTERIO DE EDUCACIÓN NACIONAL**

Al contestar la acción popular por conducto de su apoderado, adujo no ser autoridad ambiental, y en razón de ello no debió ser vinculado al proceso por acción u omisión que propicie el deterioro ambiental.

Con relación a los programas educativos y la formación académica que vienen adelantando los profesores de los municipios de la cuenca alta del río Bogotá, sostuvo que son las Secretarías de Educación Municipal las encargadas de establecer los lineamientos a seguir.

Expediente No. 25000-23-27-000-2001-0479-01  
Acumulados Nos. 2000-0428, 2001-0122, 2001-0343  
Actor: GUSTAVO MOYA ÁNGEL Y OTROS  
Acción Popular

#### **II.4.6. DEPARTAMENTO DE CUNDINAMARCA**

A través de apoderado respondió que ha hecho inversiones para atender la problemática presentada en la zona, y que adicionalmente ha adelantado campañas para la preservación de la vida acuática y la preservación del ambiente sano.

Propuso como excepción la falta de causas que determinen su responsabilidad en los hechos alegados en la demanda.

#### **II.4.7. SUPERINTENDENCIA DE SERVICIOS PÚBLICOS**

A través de apoderado, afirmó que está llevando a cabo el seguimiento de la prestación del servicio público de acueducto, alcantarillado, aseo, el tratamiento de aguas residuales y residuos sólidos y que en la actualidad ha acordado "programas de gestión y resultados" en los municipios limítrofes del río Bogotá, con el fin de llevar un control especial establecido por la Comisión de Regulación de Agua Potable y Saneamiento Básico CRA.

#### **II.4.8. CORPORACIÓN AUTÓNOMA REGIONAL DE CUNDINAMARCA -CAR**

A través de apoderado respondió que de acuerdo con la Ley 99 de 1993, artículo 31-numeral 10: sus funciones son de evaluación y control de actividades, proyectos o factores que generen o puedan generar un deterioro ambiental y aclaró que su función no es exclusiva, sino coordinada con municipios, departamentos y autoridades ambientales,

Expediente No. 25000-23-27-000-2001-0479-01  
Acumulados Nos. 2000-0428, 2001-0122, 2001-0343  
Actor: GUSTAVO MOYA ÁNGEL Y OTROS  
Acción Popular

labor que viene ejecutando en cumplimiento de sus facultades legales.

#### **II.4.9. COMISIÓN DE REGULACIÓN DE AGUA POTABLE Y SANEAMIENTO BÁSICO**

El Director Ejecutivo de la Comisión afirmó que no participó en los hechos que dieron lugar a la violación de los derechos colectivos; propuso como excepción: la falta de legitimidad por pasiva y además que bajo ninguna circunstancia, es competencia de esta entidad controlar los vertimientos que se realizan a las aguas del río Bogotá, ni controlar el impacto ambiental, tampoco adelantar acciones tendientes a la contaminación de los cuerpos de agua.

#### **II.4.10. INSTITUTO DE HIDROLOGÍA, METEOROLOGÍA Y ESTUDIOS AMBIENTALES -"IDEAM"-**

El IDEAM por conducto de apoderado judicial alegó que es un organismo eminentemente científico y técnico, asesor de las autoridades ambientales, y no entidad ejecutora.

Resaltó que la función de monitoreo y control sobre los cuerpos de agua específicos, es principalmente de la CAR, y que hasta el momento, no existe determinación del daño por acción u omisión del IDEAM, como tampoco temporalidad del mismo en la demanda.

Expediente No. 25000-23-27-000-2001-0479-01  
Acumulados Nos. 2000-0428, 2001-0122, 2001-0343  
Actor: GUSTAVO MOYA ÁNGEL Y OTROS  
Acción Popular

#### **II.4.11. INSTITUTO GEOGRÁFICO AGUSTÍN CODAZZI "IGAC"**

A través de apoderado respondió, que la entidad es ajena a cualquier responsabilidad, y no puede tener ninguna clase de participación por acción u omisión.

Alegó la excepción de falta de legitimación en la causa por parte pasiva, pues no ha violado o amenazado con violar los derechos e intereses colectivos, en lo tocante a la contaminación del río Bogotá y la protección al derecho a un ambiente sano.

#### **II.4.12. DISTRITO CAPITAL**

El Director de Asuntos Judiciales de la Secretaría General de la Alcaldía Mayor de Bogotá, señaló que carece de jurisdicción y competencia por factor territorial, puesto que la ley no le ha atribuido la función de protección al medio ambiente por fuera del perímetro urbano de la ciudad de Bogotá, razón por la cual propuso como excepción la falta de legitimación en la causa por pasiva.

Expuso que de conformidad con el Decreto 619 de 28 de julio de 2000 (POT), corresponde a la E.A.A.B. demarcar las rondas y las zonas de manejo, así como velar por la preservación ambiental y el cuidado del río.

Finalmente mencionó las actividades que ha venido desarrollando en relación con la descontaminación del río Bogotá: proyectos de construcción de las plantas de

Expediente No. 25000-23-27-000-2001-0479-01  
Acumulados Nos. 2000-0428, 2001-0122, 2001-0343  
Actor: GUSTAVO MOYA ÁNGEL Y OTROS  
Acción Popular

tratamiento del Salitre, Fucha y Tunjuelo, programa de participación comunitaria para recuperar quebradas del Distrito, arborización de la ronda del río Tunjuelito, recuperación de parques y humedales del Distrito, del parque lineal Molinos Córdoba - Juan Amarillo - Jaboque, entre otros.

#### **II.4.13. MUNICIPIO DE CHOCONTÁ**

El Alcalde Municipal, afirmó que el municipio cuenta con una planta de tratamiento de aguas residuales domésticas, administrada por la CAR, y las aguas residuales en un 85% se vierten a una tubería que va paralela al río Bogotá y desembocan allí.

Añadió que, "En la jurisdicción del municipio encontramos cincuenta y cinco curtiembres en la vereda Chingacio, de las cuales trece están tramitando su respectivas licencias ambientales ante la CAR y las otras 42, tienen expedientes en reglamentación y licencia de la misma entidad".

#### **II.4.14. MUNICIPIO DE VILLAPINZÓN**

A través de apoderado se opuso a las pretensiones de la acción popular, por considerar que la misma carece de fundamentos fácticos, jurídicos y probatorios.

Con relación a las declaraciones y condenas, se remite a las formuladas en la Acción Popular 01-00479.

Expediente No. 25000-23-27-000-2001-0479-01  
Acumulados Nos. 2000-0428, 2001-0122, 2001-0343  
Actor: GUSTAVO MOYA ÁNGEL Y OTROS  
Acción Popular

#### **II.4.15. MUNICIPIO DE TOCANCIPÁ**

Al pronunciarse sobre la acción instaurada, el alcalde respondió que el municipio no hace vertimientos al río Bogotá, pues además de contar con una planta de tratamiento de aguas residuales, en el municipio existe una política de saneamiento básico prevista en el POT.

Estableció que frente a las declaraciones y condenas, no hay argumentos técnicos y jurídicos contundentes.

#### **II.4.16. MUNICIPIO DE LA CALERA**

A través de apoderado afirmó que ha ejecutado obras como la planta de tratamiento de las aguas residuales que para la fecha se construyó por la CAR. Además propuso como excepción, la *"Existencia de Infraestructura propia del Municipio de la Calera para la recuperación y descontaminación del río Teusacá"*.

Puntualizó que la planta de pretratamiento de aguas residuales del Matadero Municipal, fue objeto de diagnóstico y estudio previo para la recuperación de las cuencas de los ríos Teusacá, Blanco y parte alta del río Siecha.

#### **II.4.17. MUNICIPIO DE SOPÓ**

A través de apoderado manifestó su oposición a todas las pretensiones porque el municipio suscribió el convenio interinstitucional No. 147 de 1991, para la construcción

Expediente No. 25000-23-27-000-2001-0479-01  
Acumulados Nos. 2000-0428, 2001-0122, 2001-0343  
Actor: GUSTAVO MOYA ÁNGEL Y OTROS  
Acción Popular

de la planta de tratamiento de aguas residuales, mediante el sistema anaeróbico, a cargo de la CAR desde 1994.

Indicó que el municipio vierte sus aguas usadas en tres sitios puntuales del Río Teusacá y cada uno de esos puntos cuenta con un tratamiento previo, mediante la utilización de pozos sépticos, los cuales vienen operando con seguimiento permanente de la CAR.

#### **II.4.18. MUNICIPIO DE ZIPAQUIRÁ**

A través de apoderado, afirmó que frente a los hechos, se atiene a lo que se pruebe y respecto de las pretensiones se opone a todas y cada una de ellas, por ausencia del debido sustento probatorio y de fundamento legal. El municipio cuenta con importantes instalaciones técnicas para el tratamiento de aguas residuales y ha desplegado planes y programas para la protección de la ronda del río Bogotá.

Señaló que la CAR, es la responsable del funcionamiento y desarrollo directo de las plantas de tratamiento, de tal manera, que el municipio resulta ajeno a cualquier situación de presunta contaminación ambiental.

#### **II.4.19. MUNICIPIO DE CHÍA**

El Secretario Jurídico de la Alcaldía Municipal, propuso la excepción de falta de legitimación en la causa por pasiva, fundamentado en: la fijación de políticas, preservación del sistema hídrico, respecto del cual forman parte del SINA: la Nación, el Ministerio del Medio

Expediente No. 25000-23-27-000-2001-0479-01  
Acumulados Nos. 2000-0428, 2001-0122, 2001-0343  
Actor: GUSTAVO MOYA ÁNGEL Y OTROS  
Acción Popular

Ambiente, el Consejo Nacional del Medio Ambiente, la CAR y los municipios.

#### **II.4.20. MUNICIPIO DE COTA**

El Alcalde Municipal afirmó que se opone a todas y a cada una de las pretensiones, puesto que el municipio no ha causado ninguna de las situaciones fácticas de que trata la presente acción y que cuenta con una planta de tratamiento de aguas negras, administrada por la CAR.

#### **II.4.21. MUNICIPIO DE TABIO**

Su apoderado manifestó que el municipio cumple con los requerimientos técnicos para el tratamiento de las aguas que se vierten en el río Chicú, pues cuenta con la planta de tratamiento de aguas, además de que el municipio no colinda con el río Bogotá.

#### **II.4.22. MUNICIPIO DE TENJO**

A través de su apoderado, afirmó que se opone a la totalidad de las pretensiones de la demanda, pues el municipio no ha causado daños ambientales a la cuenca de los ríos que comprende su jurisdicción, contrario a ello, ha venido aplicando una política de mitigación y ejecutando acciones de recuperación de las cuencas.

Expediente No. 25000-23-27-000-2001-0479-01  
Acumulados Nos. 2000-0428, 2001-0122, 2001-0343  
Actor: GUSTAVO MOYA ÁNGEL Y OTROS  
Acción Popular

II.4.23. NO CONTESTARON LA DEMANDA

En el presente proceso no se encuentran respuestas fácticas, ni jurídicas, de los siguientes vinculados:

Departamento de Planeación Nacional, municipios de Suesca, Sesquilé, Gachancipá y Cajicá.

III.

MESAS DE TRABAJO

| FECHA DE REALIZACIÓN | EXPOSITOR                                                                                  |
|----------------------|--------------------------------------------------------------------------------------------|
| Febrero 21 de 2003   | Empresa de Acueducto y Alcantarillado de Bogotá EAAB-                                      |
| Marzo 7 de 2003      | Corporación Autónoma Regional -CAR-, Empresa de Acueducto y Alcantarillado de Bogotá EAAB- |
| Marzo 14 de 2003     | Empresa de Acueducto y Alcantarillado de Bogotá EAAB-                                      |
| Marzo 21 de 2003     | Distrito Capital - Departamento Administrativo del Medio Ambiente -DAMA-                   |
| Marzo 28 de 2003     | Departamento Administrativo del Medio Ambiente -DAMA-                                      |
| Abril 4 de 2003      | Empresa de Acueducto y Alcantarillado de Bogotá EAAB-                                      |
| Abril 10 de 2003     | Empresa de Energía de Bogotá                                                               |
| Abril 25 de 2003     | EMGESA                                                                                     |
| Mayo 2 de 2003       | Municipios de Madrid, Sopó, Zipaquirá, Sibaté, Cajicá, Tocancipá, Villapinzón,             |

Expediente No. 25000-23-27-000-2001-0479-01  
Acumulados Nos. 2000-0428, 2001-0122, 2001-0343  
Actor: GUSTAVO MOYA ÁNGEL Y OTROS  
Acción Popular

|                  |                                                                                                                                                                                                                                                            |
|------------------|------------------------------------------------------------------------------------------------------------------------------------------------------------------------------------------------------------------------------------------------------------|
|                  | Chocontá, Funza, Chía, Suesca, Gachancipá, Cota, Mosquera y Soacha.                                                                                                                                                                                        |
| Mayo 6 de 2003   | Corporación Autónoma Regional -CAR-, Empresa de Acueducto y Alcantarillado de Bogotá EAAB, Municipios de Villapinzón, Sibaté y Cajicá, Distrito Capital de Bogotá, EMGESA, Empresa de Energía, Ministerio de Minas y Energía y Departamento de Planeación. |
| Mayo 9 de 2003   | Fundación al Verde Vivo                                                                                                                                                                                                                                    |
| Mayo 23 de 2003  | Departamento de Cundinamarca                                                                                                                                                                                                                               |
| Mayo 30 de 2003  | Corporación Ecológica de San Benito -COESA-, Cooperativa Integral de Curtidores -COOPICUR-                                                                                                                                                                 |
| Junio 6 de 2003  | Ministerio de Ambiente, Vivienda y Desarrollo Territorial, Ministerio de Educación Nacional.                                                                                                                                                               |
| Junio 13 de 2003 | Ministerio de Agricultura y Desarrollo Rural                                                                                                                                                                                                               |
| Julio 4 de 2003  | Ministerio de Salud, Ministerio de Hacienda y Crédito Público                                                                                                                                                                                              |
| Agosto 3 de 2003 | Ministerio de Protección Social                                                                                                                                                                                                                            |

En la Mesa de Trabajo de fecha 4 de Julio del año 2003, se ordenó la suspensión de las mismas, y se les concedió término a las partes vinculadas al proceso para presentar y registrar los proyectos de pacto de cumplimiento hasta

**Expediente No. 25000-23-27-000-2001-0479-01**  
**Acumulados Nos. 2000-0428, 2001-0122, 2001-0343**  
**Actor: GUSTAVO MOYA ÁNGEL Y OTROS**  
**Acción Popular**

el día 22 de agosto de 2003, el que por auto de la misma fecha se prorrogó a petición de los apoderados de la E.A.A.B, de EMGESA y de la E.E.B, hasta el día 8 de septiembre (fl. 2875 c.p. No. 5).

Registrados los proyectos de pacto de cumplimiento se llevaron a cabo las diferentes audiencias para su presentación y discusión por las demás partes involucradas, con el fin de que consignaran sus críticas e inconformidades frente a los mismos. En atención a las modificaciones propuestas con la conducción de la Magistrada Sustanciadora, los proponentes procedieron a realizarles los ajustes correspondientes, y después de haberse llevado a cabo unas mesas de trabajo en la que participaron los técnicos de las diferentes entidades públicas demandadas con la moderación de la Magistrada y la asistencia del Técnico Ambiental Asistente del Procurador Tercero Judicial, para definir la Solución Técnica Integral del RÍO BOGOTÁ y de sus AFLUENTES, las partes procedieron a impartirles su aprobación en audiencias que para tal efecto se continuaron, dejando a consideración de la Sala la decisión respecto de los puntos en que no estuvieron de acuerdo.

Según los expertos en la materia, la descontaminación del río Bogotá obedece a un criterio único que denominaron SOLUCIÓN TÉCNICA INTEGRAL, respecto de la cual los entes involucrados no asumieron con sus propios recursos la ejecución de algunas obras, tales como el INTERCEPTOR TUNJUELO-CANOAS y el interceptor CANOAS-ALICACHÍN, como LA ESTACIÓN ELEVADORA y LA PLANTA DE CANOAS, se acordó que el tribunal profiriera las declaraciones y condenas

Expediente No. 25000-23-27-000-2001-0479-01  
Acumulados Nos. 2000-0428, 2001-0122, 2001-0343  
Actor: GUSTAVO MOYA ÁNGEL Y OTROS  
Acción Popular

pertinentes con el fin de salvaguardar los derechos colectivos amenazados y vulnerados, con el asentimiento por todas las partes en cuanto a que los puntos de los respectivos pactos que no fuesen materia de aprobación por el tribunal serían susceptibles del recurso de apelación como también lo serían las respectivas condenas tendientes a la ejecución de las obras acordadas, pero respecto de las cuales las partes no hubieren definido con cargo a qué recursos se podrían llegar a construir.

Teniendo en cuenta lo anterior, la Magistrada Sustanciadora, mediante auto de 27 de noviembre de 2003, abrió el proceso a pruebas y ordenó tener como tales los documentos aportados con la demanda y con los escritos de contestación, así como los allegados al proceso como producto de las mesas de trabajo y con los respectivos proyectos de Pacto de Cumplimiento presentados (fls. 4180-4186 c.p. No. 7).

De igual forma, se ordenó tener como pruebas las visitas técnicas realizadas a los diferentes lugares y municipios de la cuenca del río Bogotá, así como a las industrias privadas vinculadas, las cuales constan en las respectivas actas (fls. 2564 a 2566, 2710-2711 y 2674-2676 del c.p. No. 4).

También se decretó como prueba el documento Técnico elaborado por los integrantes de la Mesa de Trabajo designada por el Despacho con los anexos que lo componen.

Igualmente, se tuvo como prueba el dictamen pericial rendido por los Ingenieros Auxiliares de la Justicia,

Expediente No. 25000-23-27-000-2001-0479-01  
Acumulados Nos. 2000-0428, 2001-0122, 2001-0343  
Actor: GUSTAVO MOYA ÁNGEL Y OTROS  
Acción Popular

FABIO ROBERTO PÉREZ Y JOSÉ MANUEL GONZÁLEZ, experticio decretado inicialmente por el JUZGADO SEGUNDO CIVIL DEL CIRCUITO dentro de la acción popular instaurada por GUSTAVO MOYA ÁNGEL, pero en atención a la remisión del expediente al tribunal por dicho despacho, sólo fue presentado ante esta corporación el día 8 de octubre de 2003, y del cual se corrió traslado a las partes en proveído de fecha 27 de noviembre siguiente, contra el cual se presentaron objeciones.

Por auto del 18 de febrero de 2004 (fls. 4430-4435 c.p. No. 8), se negó la objeción por error grave del dictamen pericial impetrada por EMGESA y por el MUNICIPIO DE SIBATÉ (fls. 4384-4394 y 4403-4414 c.p. No. 8), como también no se accedió a la solicitud de aclaración y complementación del dictamen presentado por la CAR en atención a que los puntos sobre los que se elevaron las peticiones eran más de valoración probatoria en la sentencia. En éste mismo proveído se dio por agotada la etapa probatoria y se corrió traslado a las partes para alegar de conclusión, traslado que fue recurrido por la CAR en consideración a que se concedió el término previsto en el Código de Procedimiento Civil y no el que señala la Ley 472 de 1998.

Expediente No. 25000-23-27-000-2001-0479-01  
Acumulados Nos. 2000-0428, 2001-0122, 2001-0343  
Actor: GUSTAVO MOYA ÁNGEL Y OTROS  
Acción Popular

#### IV.

#### AUDIENCIA DE PACTO DE CUMPLIMIENTO

El día 17 de Septiembre de 2001 se llevó a cabo la Audiencia de Pacto de Cumplimiento consagrada en el artículo 27 de la Ley 472, por lo que se libraron sendos telegramas a las partes en contienda, como también a la sociedad EMGESA S.A., en razón a la petición previamente formulada por la apoderada de la E.E.B., de conformidad con lo regulado en el artículo 60 del Código de Procedimiento Civil (fls. 309 a 313, c.1).

En la audiencia se resolvió tener a la EMPRESA GENERADORA DE ENERGÍA "EMGESA" en su condición de litisconsorte necesario y no como sustituto de la E.E.B., a la vez integrar el contradictorio con la CAR, DAMA, DISTRITO CAPITAL, SECRETARÍA DISTRITAL DE SALUD, DEPARTAMENTO DE CUNDINAMARCA, todos los municipios que se encuentran en la cuenca del río Bogotá, según certificación que fue expedida con destino al proceso por la "CAR", tales como VILLAPINZÓN, CHOCONTÁ, SUESCA, SESQUILÉ, GACHANCIPÁ, TOCANCIPÁ, ZIPAQUIRÁ, SOPÓ, CAJICÁ, CHÍA, COTA, BOGOTÁ-D.C., FUNZA, MOSQUERA, SOACHA y SIBATÉ.

Cumplida la notificación y el traslado de la demanda con cada uno de los representantes legales de dichos entes, éstos, por conducto de apoderado judicial unos y, otros por sí mismos, procedieron a responderla.

Posteriormente, el apoderado judicial legalmente reconocido de EMGESA, solicitó la acumulación de la

Expediente No. 25000-23-27-000-2001-0479-01  
Acumulados Nos. 2000-0428, 2001-0122, 2001-0343  
Actor: GUSTAVO MOYA ÁNGEL Y OTROS  
Acción Popular

Acción Popular radicada bajo el No. 000122 que se le venía adelantando a su poderdante junto con otros demandados, en el despacho del Magistrado CARLOS ENRIQUE MORENO RUBIO (fl. 441, c.1), a lo cual se accedió mediante auto de Sala de Decisión de 28 de febrero de 2002 (fl. 703 a 704, c.1).

Por auto de 20 de marzo de 2002, se dispuso la vinculación del MUNICIPIO DE SESQUILÉ y la notificación personal a su alcalde de la presente Acción Popular.

Asimismo se reconoció personería para actuar a los apoderados de los municipios y entidades que hasta ese momento habían concurrido, como a los alcaldes de los municipios de CHÍA y CHOCONTÁ, se aceptó el llamamiento en garantía que hiciera EMGESA S.A. de las empresas LÍQUIDO CARBÓNICO COLOMBIANA S.A., COMPAÑÍA NACIONAL DE VIDRIOS S.A. "CONALVIDRIOS S.A", ETERNIT COLOMBIANA S.A, PROTEÍNAS Y ENERGÉTICOS DE COLOMBIA S.A. "PROTEICOL S.A", EMPRESA COLOMBIANA DE CABLES S.A. ESPUMADOS S.A., DISTRIBUIDORA TROPIABASTOS LTDA., STANTON Y CIA S.A., SIDERÚRGICA DE BOYACÁ S.A. "SIDIBOYACÁ", UNIABASTOS S.A. EN LIQUIDACIÓN, INDUSTRIAS SPRING S.A, MALTERÍAS DE COLOMBIA S.A., REFINADORA DE SAL S.A, ALPINA PRODUCTOS ALIMENTICIOS S.A. PAPELES Y MOLINOS S.A., hoy PAPELES Y CORRUGADOS ANDINA S.A. Y CERVECERÍA LEONA S.A., las cuales fueron vinculadas con posterioridad en su condición de demandadas, en razón a que por auto de 1º de abril siguiente, se revocó el citado llamamiento al considerarlas como agentes contaminadores del agua del río. No obstante, en cuanto a la EMPRESA DE ENERGÍA DE BOGOTÁ S.A., el DISTRITO CAPITAL DE BOGOTÁ, la EMPRESA DE

Expediente No. 25000-23-27-000-2001-0479-01  
Acumulados Nos. 2000-0428, 2001-0122, 2001-0343  
Actor: GUSTAVO MOYA ÁNGEL Y OTROS  
Acción Popular

ACUEDUCTO Y ALCANTARILLADO DE BOGOTÁ y el MUNICIPIO DE SIBATÉ se denegó el llamamiento en garantía, puesto que ya se encontraban vinculados en condición de demandados.

Dicha decisión fue recurrida por el apoderado del llamante. Su inconformidad consistía en que una cosa es la controversia entre los demandantes y quienes aparecen como demandados y, otra, es el litigio mediante el llamamiento en garantía entre codemandados, pues lo que se busca es que este aspecto se resuelva en el mismo proceso una vez que el juez haya decidido sobre la cuestión principal, determinando si el llamado debe reintegrarle suma alguna al llamante en virtud de la indemnización que éste tuviere que pagar al demandante. En el fondo es la acción subrogatoria ejercida por uno de los coautores del daño, que indemniza a los demandantes, contra los otros responsables y podría ser que EMGESA fuese condenada y si no se aceptaba ese llamado, tendría que iniciar un segundo proceso de repetición contra los otros responsables, en cambio, si se admite tendrá un título ejecutivo para repetir, para el caso que se le llegue a ejecutar, todo lo cual, no es excluyente.

Por auto de 29 de abril siguiente, se denegó la reposición aludida con las mismas razones del proveído impugnado, además de que se advirtió la ausencia de contrato o la falta de ley que obligue a los llamados a responderle a EMGESA por los daños y perjuicios que le pudieren corresponder como llamante. En ese orden, se concedió la apelación, impugnación que fue rechazada por el Consejo de Estado por auto de 6 de febrero de 2003, con ponencia del Consejero Doctor MARIO ALARIO MÉNDEZ, en

**Expediente No. 25000-23-27-000-2001-0479-01**  
**Acumulados Nos. 2000-0428, 2001-0122, 2001-0343**  
**Actor: GUSTAVO MOYA ÁNGEL Y OTROS**  
**Acción Popular**

consideración a que el recurso vertical estaba consagrado sólo contra la sentencia y contra el auto que decreta medidas cautelares (fls. 67 a 70, c.2da inst.), razón por la cual quedó en firme la decisión recurrida.

Mediante auto de fecha 31 de mayo de 2002, se acumularon los procesos Nos. 01-343 y 01-428, los cuales cursaban en el despacho de la Magistrada doctora MARTHA ROSA BETANCUR RUÍZ. (fls. 1655-1665 c.p. No.3)

Por auto calendado 19 de junio de 2002, se dio por contestada la demanda y se reconoció personería jurídica al Distrito Capital, la sociedad Eternit Colombiana S.A., Líquido Carbónico Colombiana S.A., Cristalería Peldar S.A., Compañía Nacional de Vidrios S.A., Refisal, Alpina, Distribuidora Tropiabastos LTDA, Grupo Siderúrgico Diaco, Stanton & CIA S.A., Espumados S.A., Papeles y Corrugados Andina S.A., Empresa Colombiana de Cables EMCOCABLES S.A., Proteínas y Energéticos de Colombia S.A., Uniabastos en Liquidación, Malterías de Colombia S.A., y el Municipio de Sesquilé.

En proveído de 1 de agosto del año 2002, se dio curso al incidente de nulidad de la notificación personal y cualquier actuación posterior, propuesto por las sociedades Eternit Colombiana S.A., Líquido Carbónico Colombiana S.A., Cristalería Peldar S.A., Grupo Siderúrgico Diaco S.A., Refisal, Cervecería Leona S.A., Alpina y Empresa Colombiana de Cables en Reestructuración. Así mismo, se tuvo por contestada la demanda por parte de Industrias Spring S.A. y por la Corporación Autónoma Regional (fls. 1867-1871 c.p. No.3)

**Expediente No. 25000-23-27-000-2001-0479-01**  
**Acumulados Nos. 2000-0428, 2001-0122, 2001-0343**  
**Actor: GUSTAVO MOYA ÁNGEL Y OTROS**  
**Acción Popular**

Por medio de auto de 30 de agosto del año 2002, se negó el recurso de reposición interpuesto por PROTEICOL S.A., por medio del cual pretendía se declarara la nulidad de los actos procesales de notificación de la demanda, por carecer de soporte que lo respaldara en cuanto en el expediente no obraba su escrito de contestación. De otro lado, se declaró la nulidad de las diligencias de notificación practicadas a las sociedades Eternit Colombiana S.A., Líquido Carbónico Colombiana S.A., Cristalería Peldar S.A., Grupo Siderúrgico Diaco S.A., Refisal, Cervecería Leona S.A., Alpina y Empresa Colombiana de Cables Emcocables en Reestructuración (fls. 1898-1906 c.p. No.3).

Mediante auto de 26 de noviembre del año 2002, se negó la solicitud impetrada por Eternit Colombiana S.A., Líquido Carbónico Colombiana S.A., Cristalería Peldar S.A., Grupo Siderúrgico Diaco S.A., Refisal, Cervecería Leona S.A., Alpina y Empresa Colombiana de Cables Emcocables en Reestructuración, por medio de la cual buscaban adicionar la nulidad decretada a la notificación personal para todas las actuaciones posteriores, siendo la razón de la negación el que tales actuaciones sólo habían girado en torno a la constitución de la relación jurídico procesal, sin que se hubiese adelantado otra etapa del proceso (fls. 1965-1969 c.p. No. 3).

Por medio de auto de 19 de diciembre del año 2002, se rechazó de plano el recurso de reposición interpuesto por el apoderado de la EMPRESA COLOMBIANA DE CABLES EMCOCABLES S.A., para que a su representada no se le tuviera como demandada, ni como llamada en garantía en el

**Expediente No. 25000-23-27-000-2001-0479-01**  
**Acumulados Nos. 2000-0428, 2001-0122, 2001-0343**  
**Actor: GUSTAVO MOYA ÁNGEL Y OTROS**  
**Acción Popular**

proceso, por su extemporaneidad, además de que se trataba de un asunto que había sido objeto de pronunciamiento a lo largo del trámite de la acción (fls. 2075-2083 c.p. No.3).

Mediante auto de fecha 19 de diciembre de 2002 (fls. 2075-2083 c.p.3), se fijó fecha para la continuación de la diligencia especial de que trata el artículo 27 de la Ley 472 de 1998, la cual se llevó a cabo el día 14 de febrero de 2003, a la que asistieron el Procurador Tercero en lo judicial con funciones ante esta corporación, los actores y los apoderados judiciales de: PROTEICOL S.A., E.A.A.B., Municipio de Mosquera, Municipio de Sibaté, Superintendencia de Servicios Públicos, Ministerio de Hacienda, CAR., Grupo Siderúrgico DIACO S.A., Alcaldía de la Calera, EMCOCABLES, Personería de Bogotá, Municipio de Madrid, Municipio de Tabio, Secretaría de Salud de Cundinamarca, ASOMUÑA, Municipio de Sesquilé, COLSEGUROS S.A., Municipio de Cajicá, Municipio de Zipaquirá, Contraloría de Cundinamarca, Ministerio del Medio Ambiente, Departamento Nacional de Planeación, Ministerio de Minas y Energía, Ministerio de la Protección Social, Alcaldía Mayor de Bogotá, Beneficencia de Cundinamarca, Ministerio de Comercio Industria y Turismo, Instituto Geográfico Agustín Codazzi, Secretaría Distrital de Salud, EMGESA, Instituto de Meteorología y Estudios Ambientales, Fondo de Previsión Social del Congreso de la República, Municipio de Chía, STANTON & CIA S.A., Municipio de Sopó, ALPINA, EMSERSOPO, Procuraduría Delegada para Asuntos Ambientales y Agrarios, Bogotana de Aguas S.A. E.S.P., Papeles y Corrugados Andina S.A., Ministerio de Educación Nacional,

Expediente No. 25000-23-27-000-2001-0479-01  
Acumulados Nos. 2000-0428, 2001-0122, 2001-0343  
Actor: GUSTAVO MOYA ÁNGEL Y OTROS  
Acción Popular

TROPIABASTOS S.A., Municipio de Tenjo, Gobernación de Cundinamarca, Municipio de Tocancipá, Empresa de Energía de Bogotá, UNIABASTOS, Municipio de Gachancipá, DAMA, Industrias Spring S.A. Municipio de Funza, CAR, Municipio de Cota, Municipio de Chocontá, Municipio de Villapinzón, Municipio de Suesca.

Después de referirse a la insistencia de las nulidades impetradas por el apoderado de las mencionadas industrias y a la afirmación del apoderado del Ministerio del Medio Ambiente sobre su intervención dentro de la audiencia de pacto, en cuanto ya había concurrido a la celebración del mismo en los demás procesos acumulados, la Magistrada Sustanciadora dispuso la instalación de "Mesas de Trabajo", con el objeto de marcar las pautas que dieran curso a las acciones tendientes a la recuperación del río Bogotá, para lo cual definió los grupos de trabajo encargados de estudiar y presentar alternativas de solución al problema ambiental, incluyendo en ese contexto a las siguientes entidades(fl.s. 2322-2334 c.p. No. 4): Ministerios llamados en la presente acción, Empresa de Acueducto y Alcantarillado de Bogotá, Departamento de Planeación Nacional, Distrito Capital de Bogotá- DAMA, CAR, IDEAM, EMGESA, Departamento de Cundinamarca, municipios de Sibaté, Chocontá Y Villapinzón.

Posteriormente, fueron llamados a las mesas de trabajo los demás municipios que no habían sido vinculados, quienes en adelante participaron en todas las demás audiencias, como también vinieron al escenario del proceso los diferentes sectores de la producción, tales

Expediente No. 25000-23-27-000-2001-0479-01  
Acumulados Nos. 2000-0428, 2001-0122, 2001-0343  
Actor: GUSTAVO MOYA ÁNGEL Y OTROS  
Acción Popular

como el gremio de los floricultores, lácteos, cárnicos, curtiembres, minero y de los tejares, quienes presentaron alternativas en los diferentes procesos de producción que venían adelantando. Algunas de esas industrias fueron visitadas por la Magistrada Sustanciadora en compañía de los técnicos ambientales de la CAR y el DAMA, con la asistencia de los apoderados de algunas de las demandadas, como quedó consignado en las diferentes actas.

V.

DE LAS DIFERENTES PROPUESTAS DE PACTO  
REGISTRADAS Y APROBADAS POR LAS PARTES

Cuenca Alta:

V.I.1. MUNICIPIO DE VILLAPINZÓN

| OBRA / PLANES                          | CORTO<br>PLAZO<br>(Hasta<br>5 años | MEDIANO<br>PLAZO<br>(De 5 a 10<br>años) | LARGO<br>PLAZO<br>(Más de<br>10<br>años) |
|----------------------------------------|------------------------------------|-----------------------------------------|------------------------------------------|
| Construcción del matadero municipal    | X                                  |                                         |                                          |
| Saneamiento básico                     | X                                  |                                         |                                          |
| Mantenimiento alcantarillado municipal | X                                  |                                         |                                          |

Expediente No. 25000-23-27-000-2001-0479-01  
Acumulados Nos. 2000-0428, 2001-0122, 2001-0343  
Actor: GUSTAVO MOYA ÁNGEL Y OTROS  
Acción Popular

|                                                                                                                                                                                                                                                                                                                           |   |  |  |
|---------------------------------------------------------------------------------------------------------------------------------------------------------------------------------------------------------------------------------------------------------------------------------------------------------------------------|---|--|--|
| Mantenimiento relleno sanitario.                                                                                                                                                                                                                                                                                          | X |  |  |
| "Radicación del proyecto de adquisición de predio, diseño y construcción de la planta de tratamiento, colectores y emisario final de aguas residuales para el Municipio de Villapinzón presentado ante la Gobernación de Cundinamarca y la Corporación Autónoma Regional CAR, a fecha 15 de julio de 2003 <sup>1</sup> ." | X |  |  |

V.I.2. MUNICIPIO DE CHOCONTÁ

| OBRA / PLANES                                                           | CORTO<br>PLAZO<br>(Hasta 5 años) | MEDIANO<br>PLAZO<br>(De 5 a 10 años) | LARGO<br>PLAZO<br>(Más de 10 años) |
|-------------------------------------------------------------------------|----------------------------------|--------------------------------------|------------------------------------|
| Construcción, Ampliación y Mantenimiento de Alcantarillado <sup>2</sup> | X                                |                                      |                                    |
| Compra de lotes y conservación de microcuencas.                         | X                                |                                      |                                    |
| Saneamiento básico, unidades sanitarias.                                | X                                |                                      |                                    |

<sup>1</sup> "En lo que a costos de una planta de tratamiento de los vertimientos de las curtiembres se refiere, no se cuenta con proyecto que permita establecer a la fecha el valor de la inversión, no obstante, en lo que al municipio se refiere, debe observarse que el municipio no cuenta con recursos que permitan sostener la planta, por tanto el proyecto que se pudiera avalar por parte de la entidad, tendría que advertir dicha circunstancia".  
<sup>2</sup> Comprende: Gastos de administración y operacionales del alcantarillado.

Expediente No. 25000-23-27-000-2001-0479-01  
Acumulados Nos. 2000-0428, 2001-0122, 2001-0343  
Actor: GUSTAVO MOYA ÁNGEL Y OTROS  
Acción Popular

|                                                     |   |  |  |
|-----------------------------------------------------|---|--|--|
| Construcción, mantenimiento del matadero municipal. | X |  |  |
| Producción limpia en las curtiembres.               | X |  |  |
| Construcción segunda fase matadero municipal.       | X |  |  |
| Planta de Bombeo Sector norte del Municipio.        | X |  |  |

V.I.3. MUNICIPIO DE SUESCA

| OBRA / PLANES                                               | CORTO<br><br>PLAZO<br><br>(Hasta 5 años) | MEDIANO<br><br>PLAZO<br><br>(De 5 a 10 años) | LARGO<br><br>PLAZO<br><br>(Más de 10 años) |
|-------------------------------------------------------------|------------------------------------------|----------------------------------------------|--------------------------------------------|
| Planta de tratamiento en el centro Poblado de Santa Rosita. | X                                        |                                              |                                            |
| Tercera Etapa de Alcantarillado.                            | X                                        |                                              |                                            |
| Terminación Alcantarillado Centro Poblado de Cacicazgo.     | X                                        |                                              |                                            |
| Adecuación del Matadero.                                    | X                                        |                                              |                                            |
| Planta de Tratamiento.                                      |                                          | X                                            |                                            |

Expediente No. 25000-23-27-000-2001-0479-01  
Acumulados Nos. 2000-0428, 2001-0122, 2001-0343  
Actor: GUSTAVO MOYA ÁNGEL Y OTROS  
Acción Popular

V.I.4. MUNICIPIO DE GACHANCIPÁ

| OBRA / PLANES                                                                                                                                                                                   | CORTO<br>PLAZO<br>(Hasta 5 años) | MEDIANO<br>PLAZO<br>(De 5 a 10 años) | LARGO<br>PLAZO<br>(Más de 10 años) |
|-------------------------------------------------------------------------------------------------------------------------------------------------------------------------------------------------|----------------------------------|--------------------------------------|------------------------------------|
| Reforestación de la cuenca alta del río Bogotá en el sector correspondiente al Municipio de Gachancipá, Departamento de Cundinamarca.                                                           | X                                |                                      |                                    |
| Implementación Granja Demostrativa Integral Autosuficiente con Producción Orgánica en la vereda roble centro del Municipio de Gachancipá.                                                       | X                                |                                      |                                    |
| Programa de Reforestación de la Ronda de la Quebrada Quindingua que desemboca en el río Bogotá.                                                                                                 | X                                |                                      |                                    |
| Implementación del vivero participativo para la producción de especies nativas como destinación forestal y de seguridad alimentaria en la vereda "San Bartolomé" en el Municipio de Gachancipá. | X                                |                                      |                                    |
| Integrar a los productores agropecuarias del Municipio de Gachancipá, al proyecto de conservación de agua y suelo en                                                                            | X                                |                                      |                                    |

Expediente No. 25000-23-27-000-2001-0479-01  
Acumulados Nos. 2000-0428, 2001-0122, 2001-0343  
Actor: GUSTAVO MOYA ÁNGEL Y OTROS  
Acción Popular

|                                                                                                                                     |   |  |  |
|-------------------------------------------------------------------------------------------------------------------------------------|---|--|--|
| la zona Andina de Colombia Procas como tecnología sostenible y competitiva del recurso tierra. <sup>3</sup>                         |   |  |  |
| Programa Integral de Transferencia de Tecnología para la producción limpia y comercialización de hortalizas en la Sabana de Bogotá. | X |  |  |
| La política ambiental del Municipio en el Plan de Ordenamiento Territorial <sup>4</sup> .                                           | X |  |  |
| Política de los Ecosistemas Estratégicos <sup>5</sup> .                                                                             | X |  |  |
| Política de Evaluación Seguimiento y Control <sup>6</sup> .                                                                         | X |  |  |
| Políticas de Saneamiento Básico y de Servicios Públicos en el Plan de Ordenamiento Territorial.                                     | X |  |  |
| Vertimiento de Aguas Servidas.                                                                                                      | X |  |  |

<sup>3</sup> El objetivo de este proyecto es la utilización de maquinaria agrícola adecuada que evite el deterioro del suelo, especialmente en las zonas altas, con el propósito de evitar las escorrentías y la sedimentación de los afluentes al río Bogotá.

<sup>4</sup> Incluye la política para el saneamiento ambiental mediante el control de la recolección de basuras tanto en la zona urbana como en la rural, la disposición final de residuos líquidos, sólidos, la reglamentación, apoyo y orientación a los procesos de manejo, almacenamiento y transformación de materiales de reciclaje y el tratamiento de aguas residuales, que deben ser incluidas en la recuperación de la Cuenca Alta del río Bogota Bogotá.

<sup>5</sup> El POT se propone preservar las zonas de importancia ecológica, mediante el desarrollo de acciones tendientes a la protección, conservación y restauración de los cerros que rodean al Municipio, recuperación de la Cuenca del río Bogotá, recuperación de zonas de nacederos, humedales, cauces, ríos y quebradas, protección y recuperación de especies nativas.

<sup>6</sup> Busca hacer eficiente la auditoría a los procesos de mejoramiento del entorno, protección de márgenes hídricas y cumplimiento de los planes de restauración y recuperación morfológica.

Expediente No. 25000-23-27-000-2001-0479-01  
Acumulados Nos. 2000-0428, 2001-0122, 2001-0343  
Actor: GUSTAVO MOYA ÁNGEL Y OTROS  
Acción Popular

|                                                                                       |   |  |  |
|---------------------------------------------------------------------------------------|---|--|--|
|                                                                                       |   |  |  |
| Ampliación de la Cobertura y Mejoramiento del Servicio de Alcantarillado.             | X |  |  |
| Construcción de una Planta de Tratamiento de Aguas Residuales en la vereda Roble Sur. | X |  |  |

V.1.5. MUNICIPIO DE COGUA

| OBRA / PLANES        | CORTO PLAZO<br>(Hasta 5 años) | MEDIANO PLAZO<br>(De 5 a 10 años) | LARGO PLAZO<br>(Más de 10 años) |
|----------------------|-------------------------------|-----------------------------------|---------------------------------|
| Reubicación Matadero |                               | X                                 |                                 |

V.1.6. MUNICIPIO DE TOCANCIPÁ

| OBRA / PLANES                                                   | CORTO PLAZO<br>(Hasta 5 años) | MEDIANO PLAZO<br>(De 5 a 10 años) | LARGO PLAZO<br>(Más de 10 años) |
|-----------------------------------------------------------------|-------------------------------|-----------------------------------|---------------------------------|
| Terminación de los Acueductos de las Veredas "las Esmeraldas" y |                               | X                                 |                                 |

Expediente No. 25000-23-27-000-2001-0479-01  
 Acumulados Nos. 2000-0428, 2001-0122, 2001-0343  
 Actor: GUSTAVO MOYA ÁNGEL Y OTROS  
 Acción Popular

|                                                                                                             |   |  |   |
|-------------------------------------------------------------------------------------------------------------|---|--|---|
| Canativa <sup>7</sup> .                                                                                     |   |  |   |
| Estudio del Plan Maestro de Acueducto para el casco urbano y rural.                                         | X |  |   |
| Inicio de obras de inversión establecidas en el plan.                                                       | X |  |   |
| Sistema de Tratamiento de Aguas Residuales - Planta de Sacrificio de Ganado.                                | X |  |   |
| Plan de Gestión Integral de Residuos Sólidos <sup>8</sup> .                                                 | X |  |   |
| Restauración y recuperación morfológica de una cantera en la provincia Sabana Centro.                       | X |  |   |
| Diagnóstico Ambiental en su segunda etapa Vereda Canavita.                                                  | X |  |   |
| Adquisición de predios de interés hídrico para consolidar el corredor ambiental.                            | X |  |   |
| Implementar programas de mantenimiento preventivo y correctivo de la infraestructura de saneamiento básico. |   |  | X |
| Diseño y construcción de un sistema de aprovechamiento y tratamiento de los residuos sólidos.               |   |  | X |
| Manejo Integral de los residuos hospitalarios y patógenos.                                                  |   |  | X |

<sup>7</sup> Esta obra contribuirá a liberar las microcuencas de donde se abastecía la población, logrando recuperar la flora, fauna y el recurso hídrico.

<sup>8</sup> Comprende campañas de sensibilización y educación acerca del manejo de los residuos sólidos, como la separación en la fuente, rutas de recolección selectiva.

Expediente No. 25000-23-27-000-2001-0479-01  
Acumulados Nos. 2000-0428, 2001-0122, 2001-0343  
Actor: GUSTAVO MOYA ÁNGEL Y OTROS  
Acción Popular

V.1.7. MUNICIPIO DE ZIPAQUIRÁ Y EMPRESA DE ACUEDUCTO, ALCANTARILLADO Y ASEO DE ZIPAQUIRÁ E. S. P.

| OBRAS/PLANES                                                                                                                                                                                                                                                                                                      | CORTO<br>PLAZO<br>(Hasta 5 años) | MEDIANO<br>PLAZO<br>(De 5 a 10 años) | LARGO<br>PLAZO<br>(Desde 10 años) |
|-------------------------------------------------------------------------------------------------------------------------------------------------------------------------------------------------------------------------------------------------------------------------------------------------------------------|----------------------------------|--------------------------------------|-----------------------------------|
| <b>Aguas residuales</b><br><br>Interceptor Menor - Hospital<br>Interceptor Menor - Villa Luz<br>Interceptor Menor - El Prado<br>Interceptor Calle 8 Algarra 3<br>Interceptor Las Villas<br>Interceptor Centro - San Pablo<br>Interceptor Santa Isabel II<br>Interceptor Santa Isabel I<br>Interceptor Barandillas | X                                |                                      |                                   |
| <b>Aguas Residuales</b><br><br>Estación de Bombeo y Línea Impulsión San Miguel<br>Estación de Bombeo y Línea Impulsión Barandillas<br>Interceptor Salinas<br>Estación de Bombeo y Línea de Impulsión Pasoancho<br>Impulsión Santiago Pérez<br>Interceptor Zipalandia<br>Interceptor Portachuelo                   |                                  | X                                    |                                   |

Expediente No. 25000-23-27-000-2001-0479-01  
Acumulados Nos. 2000-0428, 2001-0122, 2001-0343  
Actor: GUSTAVO MOYA ÁNGEL Y OTROS  
Acción Popular

|                                                                                                                                                                                                                                                                                                                                      |  |   |  |
|--------------------------------------------------------------------------------------------------------------------------------------------------------------------------------------------------------------------------------------------------------------------------------------------------------------------------------------|--|---|--|
| <b>Aguas Lluvias</b><br><br>Colector La Esmeralda San Carlos<br>Integral Salinas<br>Colector Bóveda a Quebrada la<br>Arteza<br>Colector Barandillas<br>Colector Adecuación Quebrada la<br>Arteza<br>Colector Alameda del Zipa<br>(Expansión)<br>Colector Calle 14 (Expansión)<br>Adecuación Ronda Río Negro<br>Colector Tejer Arteza |  | X |  |
|--------------------------------------------------------------------------------------------------------------------------------------------------------------------------------------------------------------------------------------------------------------------------------------------------------------------------------------|--|---|--|

V.1.8. MUNICIPIO DE SOPÓ

| OBRA / PLANES                                                                                                                                                                                                                          | CORTO<br>PLAZO<br>(Hasta<br>5 años) | MEDIANO<br>PLAZO<br>(De 5 a 10<br>años) | LARGO<br>PLAZO<br>(Más de<br>10 años) |
|----------------------------------------------------------------------------------------------------------------------------------------------------------------------------------------------------------------------------------------|-------------------------------------|-----------------------------------------|---------------------------------------|
| Construir y optimizar los sistemas de tratamiento de aguas residuales de acuerdo con el Plan Maestro de Acueducto y Alcantarillado de Aguas Lluvias y Residuales.                                                                      | X                                   |                                         |                                       |
| Incluir en el Proyecto del Presupuesto a presentarse el 1 de noviembre de 2003 a consideración del Concejo Municipal las partidas presupuéstales que permitan apoyo económico y técnico a la empresa de servicios públicos municipales | X                                   |                                         |                                       |

Expediente No. 25000-23-27-000-2001-0479-01  
Acumulados Nos. 2000-0428, 2001-0122, 2001-0343  
Actor: GUSTAVO MOYA ÁNGEL Y OTROS  
Acción Popular

|                                                                                                                                                                                                                |   |  |  |
|----------------------------------------------------------------------------------------------------------------------------------------------------------------------------------------------------------------|---|--|--|
| para que esta a su vez reciba y ponga en funcionamiento las plantas de tratamiento de aguas residuales PTAR I y II de la CAR.                                                                                  |   |  |  |
| Mantener la observancia de las zonas de rivera, de ríos y quebradas incluidos el río Teusacá, en cuanto no se permita construir en ellas <sup>9</sup> .                                                        | X |  |  |
| Presentar a consideración del Concejo Municipal el proyecto de acuerdo por medio del cual se modifique el P.B.O.T., que permita el traslado del centro de faenado y sacrificio a una zona para su explotación. | X |  |  |

V.1.9. MUNICIPIO DE CHÍA

| OBRA / PLANES                           | CORTO PLAZO<br>(Hasta 5 años) | MEDIANO PLAZO<br>(De 5 a 10 años) | LARGO PLAZO<br>(Más de 10 años) |
|-----------------------------------------|-------------------------------|-----------------------------------|---------------------------------|
| Plan Maestro de Acueducto <sup>10</sup> | X                             |                                   |                                 |
| Planta de Tratamiento de Agua Potable   | X                             |                                   |                                 |
| Obra - Chilacos: Redes de               |                               |                                   |                                 |

<sup>9</sup> Por intermedio de la Subsecretaria de Desarrollo Agrario y Medio Ambiente incrementar la arborización en un número superior de 2000 árboles.

<sup>10</sup> Se presentará el diagnóstico técnico del sistema, la simulación de la red matriz, el programa de agua no contabilizada y el programa de expansión. Constará de la descripción del sistema actual, diagnóstico del tratamiento y el plan de expansión de la red de alcantarillado y tratamiento de aguas residuales.

Expediente No. 25000-23-27-000-2001-0479-01  
Acumulados Nos. 2000-0428, 2001-0122, 2001-0343  
Actor: GUSTAVO MOYA ÁNGEL Y OTROS  
Acción Popular

|                                                                                                                                                            |   |   |  |
|------------------------------------------------------------------------------------------------------------------------------------------------------------|---|---|--|
| alcantarillado separadas (aguas negras y aguas lluvias) <sup>11</sup>                                                                                      | X |   |  |
| Obra - Bojacá: Redes separadas de aguas negras y aguas lluvias que subsanará las necesidades existentes.                                                   | X |   |  |
| Obra - Fagua: Completará el faltante de la red de aguas residuales.                                                                                        | X |   |  |
| Construcción Plantas de Tratamiento de Aguas Residuales: El Darién - Cataluña - El Cacique - La Paulina.<br>Recuperación de la PTAR de Chía. <sup>12</sup> |   | X |  |

V.1.10. MUNICIPIO DE COTA

| OBRA / PLANES                                                                     | CORTO<br>PLAZO<br>(Hasta 5 años) | MEDIANO<br>PLAZO<br>(De 5 a 10 años) | LARGO<br>PLAZO<br>(Más de 10 años) |
|-----------------------------------------------------------------------------------|----------------------------------|--------------------------------------|------------------------------------|
| Ampliación de la Cobertura de la Planta de Tratamiento de la Vereda Pueblo Viejo. | X                                |                                      |                                    |
| Construcción Planta de Tratamiento Vereda Roza - Sector El Hoyo.                  | X                                |                                      |                                    |
| Construcción de dos Plantas de Tratamiento Modulares Vereda                       |                                  | X                                    |                                    |

<sup>11</sup> Descongestionará el saturamiento existente en la evacuación de los residuos líquidos de la zona urbana del Municipio de Chía.  
<sup>12</sup> Se construirán otras plantas cuyo diseño y ubicación dependerán del plan maestro de alcantarillado.

Expediente No. 25000-23-27-000-2001-0479-01  
Acumulados Nos. 2000-0428, 2001-0122, 2001-0343  
Actor: GUSTAVO MOYA ÁNGEL Y OTROS  
Acción Popular

|           |  |  |  |
|-----------|--|--|--|
| Parcelas. |  |  |  |
|-----------|--|--|--|

V.1.11. MUNICIPIO DE CAJICÁ

| OBRA / PLANES                                                                                                     | CORTO<br>PLAZO<br>(Hasta 5 años) | MEDIANO<br>PLAZO<br>(De 5 a 10 años) | LARGO<br>PLAZO<br>(Más de 10 años) |
|-------------------------------------------------------------------------------------------------------------------|----------------------------------|--------------------------------------|------------------------------------|
| Construcción del alcantarillado entre la calle 7 sector Granjitas y Chunugua.                                     | X                                |                                      |                                    |
| Conexión del alcantarillado del sector Fibrit, San Jerónimo hasta la planta de tratamiento que opera la CAR.      | X                                |                                      |                                    |
| Continuación del proyecto reforestación de la ronda del río Bogotá.                                               | X                                |                                      |                                    |
| Construcción de la planta de tratamiento de los sectores de la virgen, Rincón Santo, Puerta del Sol, El Misterio. |                                  | X                                    |                                    |

Expediente No. 25000-23-27-000-2001-0479-01  
Acumulados Nos. 2000-0428, 2001-0122, 2001-0343  
Actor: GUSTAVO MOYA ÁNGEL Y OTROS  
Acción Popular

Cuenca Media

V.1.12. MUNICIPIO DE MADRID

| OBRA / PLANES                                                                                                  | CORTO<br>PLAZO<br>(Hasta 5 años) | MEDIANO<br>PLAZO<br>(De 5 a 10 años) | LARGO<br>PLAZO<br>(Más de 10 años) |
|----------------------------------------------------------------------------------------------------------------|----------------------------------|--------------------------------------|------------------------------------|
| Construcción Planta de Tratamiento de Aguas Residuales sector Pablo VI Puente de Piedra.                       | X                                |                                      |                                    |
| Construcción alcantarillado de Aguas Negras.                                                                   | X                                |                                      |                                    |
| Reforestación del río Subachoque 24.5 Hectáreas.                                                               | X                                |                                      |                                    |
| Construcción colector principal del Alcantarillado Sanitario Vereda Puente Piedra sector VI.                   | X                                |                                      |                                    |
| Construcción Alcantarillado Aguas Negras Barrios Escallón, Amparito, Echavarría, Lorena y Bolonia al Colector. | X                                |                                      |                                    |
| Construcción Planta de Tratamiento Barrio Echavarría <sup>13</sup> .                                           | X                                |                                      |                                    |
| Construcción Parque Lineal Ecoturismo río Subachoque.                                                          |                                  | X                                    |                                    |
| Reubicación de familias que se encuentran en la ribera del río.                                                |                                  |                                      | X                                  |
| Implementación del Plan Maestro de Alcantarillado y Aguas Lluvias.                                             |                                  |                                      | X                                  |

<sup>13</sup> Pretende tratar aguas aproximadamente de 6.000 personas para posteriormente desembocar al Río Río Río Subachoque.

Expediente No. 25000-23-27-000-2001-0479-01  
Acumulados Nos. 2000-0428, 2001-0122, 2001-0343  
Actor: GUSTAVO MOYA ÁNGEL Y OTROS  
Acción Popular

#### V.1.12.1 EDUCACIÓN Y CONTROL

-Promover en el Municipio una cultura y pertenencia hacia nuestra fuente hídrica, a través de talleres, organización del cabildo verde, recorridos turísticos, así como establecer como materia de estudio obligatoria para todas las escuelas y colegios del municipio, así como la organización de grupos ecológicos.

-Hacer efectivo el cobro de las tasas retributivas y/o compensatorias por el uso del agua en el municipio, para su reinversión en la recuperación del Río y/o sistema ambiental municipal.

-Promover el funcionamiento adecuado de las plantas de tratamiento y lagunas de oxidación Madrid I y Madrid II, que funcionan en el municipio.

-Establecer acciones coordinadas entre el Municipio de Madrid, los municipios ribereños y la autoridad competente ambiental, para el seguimiento y control a las captaciones de aguas ilegales por parte de la autoridad ambiental, incluyendo pozo profundos reservorios, sifones de captación y localización de motobombas de sub succión.

-Seguimiento y control de los planes de manejo ambiental para la explotación y/o recuperación de las canteras que funcionan en el Municipio.

-Conservación del Cerro de Carrasquilla.

-Control de la deforestación a través de la Umata del Municipio.

Expediente No. 25000-23-27-000-2001-0479-01  
Acumulados Nos. 2000-0428, 2001-0122, 2001-0343  
Actor: GUSTAVO MOYA ÁNGEL Y OTROS  
Acción Popular

V.1.13. MUNICIPIO DE MOSQUERA

| OBRA / PLANES                                                                                      | CORTO<br>PLAZO<br>(Hasta 5 años | MEDIANO<br>PLAZO<br>(De 5 a 10 años) | LARGO<br>PLAZO<br>(Más de 10 años) |
|----------------------------------------------------------------------------------------------------|---------------------------------|--------------------------------------|------------------------------------|
| Destaponamiento pozo Siete Trojes <sup>14</sup> .                                                  | X                               |                                      |                                    |
| Mejoramiento o nueva construcción de la Planta de Tratamiento Siete Trojes <sup>15</sup> .         | X                               |                                      |                                    |
| Construcción de pozo profundo en el sector de los Puentes Vereda Balsillas <sup>16</sup> .         | X                               |                                      |                                    |
| Construcción línea de conducción de agua del pozo puentes a las plantas del centro <sup>17</sup> . | X                               |                                      |                                    |
| Ampliación en la capacidad de las plantas de tratamiento del centro.                               | X                               |                                      |                                    |
| Adecuación del laboratorio de aguas.                                                               | X                               |                                      |                                    |
| Construcción y puesta en funcionamiento del Colector Transval <sup>18</sup> .                      | X                               |                                      |                                    |

<sup>14</sup> Pozo construido como condición para la disponibilidad del servicio de acueducto de los proyectos urbanísticos en cercanías a la Vereda Siete Trojes, el cual no ha podido ser explotado por fallas técnicas.

<sup>15</sup> Con el objetivo de potabilizar el agua que se extraiga del pozo Siete Trojes.

<sup>16</sup> Para obtener una fuente de agua propia y no comprar agua en bloque a la E.A.A.B.

<sup>17</sup> Para conducir el agua extraída del pozo puentes hasta las plantas de tratamiento del centro, impulsada mediante una estación de bombeo ubicada en el predio en que se construya el pozo.

<sup>18</sup> Construcción como consecuencia del deficiente sistema de alcantarillado sanitario en su "colector de la tercera".

Expediente No. 25000-23-27-000-2001-0479-01  
Acumulados Nos. 2000-0428, 2001-0122, 2001-0343  
Actor: GUSTAVO MOYA ÁNGEL Y OTROS  
Acción Popular

|                                                                                                                                          |   |   |   |
|------------------------------------------------------------------------------------------------------------------------------------------|---|---|---|
| Construcción alcantarillado de barrios, la cumbre, Altos de Santa Ana, Villa del Rocío, Santa Ana, El Dorado y el Carmen <sup>19</sup> . | X |   |   |
| Construcción y puesta en marcha de la planta de tratamiento de aguas residuales del barrio Porvenir Río.                                 | X |   |   |
| Reubicación de habitantes del barrio Porvenir Río asentados en la ronda del río Bogotá.                                                  | X |   |   |
| Recuperación Ronda Río Bogotá                                                                                                            |   |   | X |
| Recuperación Ronda río Balsillas y Subachoque.                                                                                           |   |   | X |
| Delimitación Ronda "Ciénaga del Gualí".                                                                                                  |   | X |   |
| Delimitación Ronda de la Laguna de la Herrera.                                                                                           |   | X |   |
| Malla Ambiental.                                                                                                                         |   | X |   |
| Reserva Forestal.                                                                                                                        |   | X |   |
| Recuperación Morfológica.                                                                                                                |   |   | X |
| Estudios y Diseños Plan Maestro Alcantarillado - Aguas residuales domésticas.                                                            | X |   |   |

<sup>19</sup> Construcción de redes de alcantarillado de aguas lluvias y de redes de alcantarillado de aguas residuales domésticas independientes para tales barrios.

Expediente No. 25000-23-27-000-2001-0479-01  
Acumulados Nos. 2000-0428, 2001-0122, 2001-0343  
Actor: GUSTAVO MOYA ÁNGEL Y OTROS  
Acción Popular

V.1.14. MUNICIPIO DE FACATATIVÁ

| OBRAS / PLANES                                                                                                                                                            | CORTO<br>PLAZO<br>(Hasta 5 años) | MEDIANO<br>PLAZO<br>(De 5 a 10 años) | LARGO<br>PLAZO<br>(Desde 10 años) |
|---------------------------------------------------------------------------------------------------------------------------------------------------------------------------|----------------------------------|--------------------------------------|-----------------------------------|
| Construcción del colector que se utiliza para conducir aguas residuales domésticas, ubicado en la vereda de San Rafael Bajo.                                              | X                                |                                      |                                   |
| Construcción del colector ubicado en el Barrio Siete de Agosto, utilizado para conducir aguas residuales domésticas con el fin de descontaminar la quebrada de Chapinero. | X                                |                                      |                                   |
| Construcción de la Planta de Tratamiento de Aguas Residuales Petar II <sup>20</sup> .                                                                                     |                                  | X                                    |                                   |

<sup>20</sup> El fin de esta Planta es recoger las aguas de todos los colectores y completar así la recolección y purificación que no se está realizando a través de la planta PTAR I.

Expediente No. 25000-23-27-000-2001-0479-01  
Acumulados Nos. 2000-0428, 2001-0122, 2001-0343  
Actor: GUSTAVO MOYA ÁNGEL Y OTROS  
Acción Popular

V.1.15. MUNICIPIO DE FUNZA

| OBRA / PLANES                                                                                                                                                                                                                                                                                               | CORTO<br>PLAZO<br>(Hasta<br>5 años) | MEDIANO<br>PLAZO<br>(De 5 a<br>10 años) | LARGO<br>PLAZO<br>(Más de<br>10 años) |
|-------------------------------------------------------------------------------------------------------------------------------------------------------------------------------------------------------------------------------------------------------------------------------------------------------------|-------------------------------------|-----------------------------------------|---------------------------------------|
| Recuperación de las zonas de Ronda del río Bogotá aprox. 1 km de longitud y 150m de ancho <sup>21</sup> .                                                                                                                                                                                                   | X                                   |                                         |                                       |
| Cerramientos transparentes en malla aislando éstas zonas <sup>22</sup> .                                                                                                                                                                                                                                    | X                                   |                                         |                                       |
| Tratamiento correcto de las aguas residuales del Municipio a través de la Planta de Tratamiento.                                                                                                                                                                                                            | X                                   |                                         |                                       |
| Ampliación y mantenimiento de las fuentes hídricas y forestales recuperando el cuerpo de humedales.                                                                                                                                                                                                         | X                                   |                                         |                                       |
| Continuar con el proceso de firmar escrituras con los propietarios de los terrenos aledaños a los cuerpos de agua (rondas del humedal del río Bogotá) en casi 40.000 m <sup>2</sup> de zonas de ronda y manejo ambiental como cesión gratuita al municipio para asegurar su control, manejo y conservación. | X                                   |                                         |                                       |
| Las inversiones proyectadas tanto de la Alcaldía como de la Empresa                                                                                                                                                                                                                                         |                                     |                                         |                                       |

<sup>21</sup> 50 m de ronda y 100 m de manejo ambiental, procurando su escrituración al municipio  
<sup>22</sup> Canjeando las zonas de cesión obligatorias de proyectos industriales incluidos en el PBOT para ser reemplazadas por las zonas de reserva ambiental.

Expediente No. 25000-23-27-000-2001-0479-01  
Acumulados Nos. 2000-0428, 2001-0122, 2001-0343  
Actor: GUSTAVO MOYA ÁNGEL Y OTROS  
Acción Popular

|                                                                                                                                                                                                                                                                                                                                                                              |   |  |  |
|------------------------------------------------------------------------------------------------------------------------------------------------------------------------------------------------------------------------------------------------------------------------------------------------------------------------------------------------------------------------------|---|--|--|
| de Acueducto y Alcantarillado Funza EMAAF E. S. P. para los sectores de acueducto, alcantarillado sanitario y alcantarillado pluvial para los próximos cuatro (4) años por un total de 11.310 millones de pesos, adicionalmente de la inversión de 459 millones de pesos de recursos de la Nación en el mantenimiento, reforestación y conservación del cuerpo de humedales. | X |  |  |
| En cuanto a cobertura de Redes de Alcantarillado Sanitario, la Administración Municipal proyecta a que durante los próximos cuatro años se tendrá una cobertura del 100% del casco Urbano, aguas que serán dirigidas en su totalidad a la PTAR para su tratamiento y final disposición en el cuerpo de humedales.                                                            | X |  |  |
| Traslado del matadero municipal y transformación del mismo en una planta de sacrificio y frigorífico de manera que se eleven los estándares de la prestación del servicio.                                                                                                                                                                                                   | X |  |  |

Expediente No. 25000-23-27-000-2001-0479-01  
Acumulados Nos. 2000-0428, 2001-0122, 2001-0343  
Actor: GUSTAVO MOYA ÁNGEL Y OTROS  
Acción Popular

Cuenca Baja:

**V.1.16. MUNICIPIO DE SOACHA**

| OBRA / PLANES                                                                                                                                                                                                  | CORTO<br>PLAZO<br>(Hasta 5 años) | MEDIANO<br>PLAZO<br>(De 5 a 10 años) | LARGO<br>PLAZO<br>(Más de 10 años) |
|----------------------------------------------------------------------------------------------------------------------------------------------------------------------------------------------------------------|----------------------------------|--------------------------------------|------------------------------------|
| Construcción primera etapa de los interceptores de Aguas Negras de la cuenca Terreros- Tibanica- Bogotá D.C.- Soacha Departamento de Cundinamarca <sup>23</sup> .                                              |                                  | X                                    |                                    |
| Construcción redes matrices de acueducto para a zona sur (El Papiro, San Nicolás, Conviva, Compartir, Ciudadela Latina y Ciudad de Quito) y altos de Cazucá- Zona Intermedia- Soacha- Terreros <sup>24</sup> . | X                                |                                      |                                    |
| Construcción Planta Tratamiento Primario-Matadero Municipal.                                                                                                                                                   | X XXX                            |                                      | X                                  |
| Construcción Redes de aguas negras, lluvias, suministro de acueducto y parte proporcional del                                                                                                                  | X                                |                                      |                                    |

<sup>23</sup> Convenio interadministrativo de apoyo técnico- financiero firmado por el Municipio de Soacha, el Departamento de Cundinamarca y la Empresa de Acueducto y Alcantarillado de Bogotá.

<sup>24</sup> Convenio interinstitucional de apoyo financiero, firmado por el Municipio de Soacha, Ministerio de Desarrollo Económico, Departamento de Cundinamarca y la Empresa de Acueducto y Alcantarillado de Bogotá.

Expediente No. 25000-23-27-000-2001-0479-01  
Acumulados Nos. 2000-0428, 2001-0122, 2001-0343  
Actor: GUSTAVO MOYA ÁNGEL Y OTROS  
Acción Popular

|                                   |  |  |  |
|-----------------------------------|--|--|--|
| Convenio general Colector Canoas. |  |  |  |
|-----------------------------------|--|--|--|

V.1.17. MUNICIPIO DE SIBATÉ

| OBRA / PLANES                                                                                                                                                                                                                             | CORTO<br>PLAZO<br><br>(Hasta<br>5 años) | MEDIANO<br>PLAZO<br><br>(De 5 a<br>10 años) | LARGO<br>PLAZO<br><br>(Más de<br>10 años) |
|-------------------------------------------------------------------------------------------------------------------------------------------------------------------------------------------------------------------------------------------|-----------------------------------------|---------------------------------------------|-------------------------------------------|
| Interceptor de Aguas Residuales del área Urbana Central, en desarrollo de los estudios y diseños presentados.                                                                                                                             | X                                       |                                             |                                           |
| Abrir un nuevo matadero Municipal que cumpla con las reglamentaciones de tipo sanitario y de uso del suelo mediante el sistema de concesión para que sea construido por el sector privado.                                                |                                         | X                                           |                                           |
| La administración del Municipio de Sibaté se compromete a verificar lo dispuesto mediante la Resolución No. DRF 193 de 24 de julio del 2000 en relación con los reservorios de agua donde se almacena el agua de riego para los cultivos. | X                                       |                                             |                                           |

Expediente No. 25000-23-27-000-2001-0479-01  
Acumulados Nos. 2000-0428, 2001-0122, 2001-0343  
Actor: GUSTAVO MOYA ÁNGEL Y OTROS  
Acción Popular

V.1.18 PROBLEMAS, ACTORES Y POSIBLES SOLUCIONES

V.1.18.1. CUENCA ALTA

| PROBLEMA                                                       | ACTOR                         | SOLUCIÓN                                                                                                                                                                                                  |
|----------------------------------------------------------------|-------------------------------|-----------------------------------------------------------------------------------------------------------------------------------------------------------------------------------------------------------|
| Contaminación industrial                                       | Curtidores                    | Conglomerado industrial por curtiembres. Especializado por actividades. Implementación de tecnologías limpias.                                                                                            |
| Alteración de los ecosistemas de páramo y ecosistemas boscosos | Papicultores                  | Recuperación de las zonas de páramo. Priorizar zonas de compra de páramos por parte de los municipios. Reforestación y concientización a las comunidades y gremios.                                       |
| Contaminación por aguas residuales domésticas                  | Municipio y comunidad         | Culminar cobertura de alcantarillado municipal, reutilización del agua proveniente de las PTAR, pre tratamiento de aguas provenientes de las zonas rurales, participación de la comunidad y capacitación. |
| Presión sobre aguas subterráneas                               | Floricultores                 | Implementación de sistemas de reutilización de aguas, implementación de tecnologías limpias.                                                                                                              |
| Alteración de los ecosistemas                                  | Ladrilleras                   | Reforestación y recuperación de las zonas de cantera utilizadas por los industriales.                                                                                                                     |
| Alteración de los ecosistemas                                  | Industrias explotación minera | Implementación de tecnología limpia.                                                                                                                                                                      |

Expediente No. 25000-23-27-000-2001-0479-01  
Acumulados Nos. 2000-0428, 2001-0122, 2001-0343  
Actor: GUSTAVO MOYA ÁNGEL Y OTROS  
Acción Popular

|                           |                        |                                                                              |
|---------------------------|------------------------|------------------------------------------------------------------------------|
| Pérdida de Biodiversidad  | Explotación Forestal   | Implementación de mecanismos de explotación con criterios de sostenibilidad. |
| Urbanización de la Sabana | Municipios y comunidad | Mesa Regional                                                                |

V.1.18.2. CUENCA MEDIA

| PROBLEMA                                                         | ACTOR            | SOLUCIÓN                                                                                                                                                                                                                                                                                        |
|------------------------------------------------------------------|------------------|-------------------------------------------------------------------------------------------------------------------------------------------------------------------------------------------------------------------------------------------------------------------------------------------------|
| Contaminación por aguas residuales domésticas.                   | Distrito Capital | Culminar cobertura de alcantarillado construcción de la solución para el tratamiento de las aguas residuales dentro del marco que el Distrito convenga con el concesionario dentro de los requerimientos ambientales establecidos para este caso, participación de la comunidad y capacitación. |
| Contaminación industrial                                         | Industrias       | Implementación de tecnologías limpias, desarrollo de sistemas de tratamiento de aguas industriales.                                                                                                                                                                                             |
| Sobre explotación del recurso hídrico subterráneo                | Agroindustrias   | Reutilización del agua proveniente de la PTAR, optimización del uso del recurso hídrico                                                                                                                                                                                                         |
| Aportes de sedimentos provenientes de la explotación de canteras | Mineros          | Desarrollo de acueducto de las actividades cumpliendo con la normatividad ambiental.                                                                                                                                                                                                            |

Expediente No. 25000-23-27-000-2001-0479-01  
Acumulados Nos. 2000-0428, 2001-0122, 2001-0343  
Actor: GUSTAVO MOYA ÁNGEL Y OTROS  
Acción Popular

|                           |                          |                                                                                                                                                                                       |
|---------------------------|--------------------------|---------------------------------------------------------------------------------------------------------------------------------------------------------------------------------------|
| Urbanización              | Comunidad<br>Autoridades | Implementación de mecanismos que generen un control de la migración hacia el distrito, la ciudad, las poblaciones vecinas lo cual implica una mayor presión sobre el recurso hídrico. |
| Explotación<br>Energética | Emgesa - EEB             | Ampliación de la concepción de uso energético de la infraestructura a usos ambientales a efectos de aumentar la disponibilidad del recurso.                                           |

V.1.18.3. CUENCA BAJA

| PROBLEMA                                       | ACTOR                 | SOLUCIÓN                                                                                                                                                |
|------------------------------------------------|-----------------------|---------------------------------------------------------------------------------------------------------------------------------------------------------|
| Escasez del recurso Hídrico.                   | Cuencas superiores    | Descontaminación de las aguas provenientes de estas subcuencas, uso de efluentes de las PTAR.                                                           |
| Contaminación por agroquímicos.                | Agricultores          | Optimización del uso de agroquímicos, participación de la comunidad y capacitación.                                                                     |
| Contaminación por aguas residuales domésticas. | Municipio y comunidad | Culminar cobertura de alcantarillado municipal pretratamiento de aguas provenientes de las zonas rurales, participación de la comunidad y capacitación. |
| Sobre explotación del recurso suelo            | Industria Ganadera    | Establecimiento de tecnología que permita delimitar la frontera agropecuaria.                                                                           |

Expediente No. 25000-23-27-000-2001-0479-01  
Acumulados Nos. 2000-0428, 2001-0122, 2001-0343  
Actor: GUSTAVO MOYA ÁNGEL Y OTROS  
Acción Popular

|              |                          |                                                            |
|--------------|--------------------------|------------------------------------------------------------|
| Urbanización | Municipios y comunidades | Control de la densificación y crecimiento de la población. |
|--------------|--------------------------|------------------------------------------------------------|

V.1.19. PROGRAMAS -CAR-

| CONVENIO        | AREA DE INFLUENCIA                             | DESCRIPCIÓN DEL PROYECTO                                                                                                                                                                                                                                                                                                                                                           |
|-----------------|------------------------------------------------|------------------------------------------------------------------------------------------------------------------------------------------------------------------------------------------------------------------------------------------------------------------------------------------------------------------------------------------------------------------------------------|
| CAR- Distrito   | Cuenca Media del río Bogotá                    | La Corporación seguirá aportando los recursos establecidos en el Parágrafo 2 del Artículo 44 de la Ley 99 de 1993 al proyecto de saneamiento de la cuenca media siguiendo las directrices de los estudios analizados por el Distrito. <i>"Inversión Ambiental"</i> .                                                                                                               |
| Deuda BID       | Cuenca Alta y margen occidental del río Bogotá | La corporación seguirá sirviendo la deuda, correspondiente a los dos créditos adquiridos con el BID por concepto de los créditos para financiar la construcción de las PTAR. La deuda fue contraída en dólares y pagadera en dólares lo que genera una gran carga financiera para la Corporación asociada con la fluctuación del valor del dólar.                                  |
| CAR- Municipios | Cuenca Alta y Media                            | La contaminación del río Bogotá, es generada por la concentración demográfica y económica del área, lo cual causa grandes costos sociales sobre la salud pública, el costo de tratamiento del agua, las limitaciones de la actividad agrícola, el uso intenso de las aguas subterráneas, la eutroficación y consecuente destrucción de humedales. <u>La CAR propone ampliar la</u> |

Expediente No. 25000-23-27-000-2001-0479-01  
Acumulados Nos. 2000-0428, 2001-0122, 2001-0343  
Actor: GUSTAVO MOYA ÁNGEL Y OTROS  
Acción Popular

|            |                                                     |                                                                                                                                                                                                                                                                                                                                                                                                                                                               |
|------------|-----------------------------------------------------|---------------------------------------------------------------------------------------------------------------------------------------------------------------------------------------------------------------------------------------------------------------------------------------------------------------------------------------------------------------------------------------------------------------------------------------------------------------|
|            |                                                     | <u>capacidad y/u optimizar los sistemas de tratamiento de aguas residuales domésticas existentes a cargo de la jurisdicción.</u> Esta tarea comprende la ejecución de obras de ingeniería sanitaria y saneamiento ambiental en los municipios del área de jurisdicción de la CAR con el propósito de mejorar la calidad de las aguas de la Cuenca Alta y las condiciones ambientales de la región, <u>comprende la Operación y Mantenimiento de las PTAR.</u> |
| CAR        | Cuenca del río Bogotá, conformada por 19 subcuencas | Dada la magnitud y la complejidad de la cuenca del río Bogotá, <u>no se iniciará proceso de ordenación de toda la cuenca, sino que se ordenarán las subcuencas que la conforman, sin perder de vista la cuenca total.</u> Para cada subcuenca se debe seguir el procedimiento del Decreto 1729 de 2002, los pasos son: Diagnostico, Prospectiva, Formulación, Ejecución y Seguimiento.                                                                        |
| CAR        | Cuenca del Río                                      | Para mejorar el control hidrológico y agilizar la operación de los embalses, se ha previsto automatizar la medición de caudales y las maniobras de apertura o cierre de válvulas de descarga, con sistemas Telemétricos que permitan el manejo en tiempo real. Para lo cual se compromete a la Operación, Mantenimiento permanente y Automatización del EMBALSE DEL SISGA Y NEUSA.                                                                            |
| CAR- IDEAM | Toda la Jurisdicción                                | Realizar un Diagnóstico del estado actual de los equipos mecánicos                                                                                                                                                                                                                                                                                                                                                                                            |

Expediente No. 25000-23-27-000-2001-0479-01  
Acumulados Nos. 2000-0428, 2001-0122, 2001-0343  
Actor: GUSTAVO MOYA ÁNGEL Y OTROS  
Acción Popular

|                                                                                |                          |                                                                                                                                                                                                                                                                                                                                                                                                                                                                                                                                                                                                                                         |
|--------------------------------------------------------------------------------|--------------------------|-----------------------------------------------------------------------------------------------------------------------------------------------------------------------------------------------------------------------------------------------------------------------------------------------------------------------------------------------------------------------------------------------------------------------------------------------------------------------------------------------------------------------------------------------------------------------------------------------------------------------------------------|
|                                                                                | de la CAR                | instalados en las estaciones que conforman la Red Hidrometeorológica, con el fin de seleccionar los equipos mecánicos que requieren ser reemplazados, analizar e identificar en cada subcuenca contemplada en la jurisdicción de la CAR las necesidades de información hidrometeorológica, con el fin de definir el número y las categorías de las estaciones, instalar estaciones telemétricas con el fin de evitar desastres e identificar los sitios donde se realizan vertimientos a las aguas del río Bogotá y a sus afluentes para implementar gradualmente estaciones de monitoreo de calidad de agua.                           |
| CAR-<br>Alcaldías-<br>Comunidades-<br>CREPAD- Fondo<br>Nacional de<br>Regalías | Cuenca del<br>río Bogotá | Inicialmente el proyecto contempla la ejecución del levantamiento topográfico de las márgenes del Río en el sector de Suesca - Tocancipá, para identificar sectores críticos en cuanto a jarillones, compuertas y alteraciones por vegetación y sedimentos. Posteriormente, se proponen y ejecutan trabajos, conjuntamente con las Alcaldías y ribereños, para reducir la vulnerabilidad a las inundaciones. Como aporte a la continuidad del saneamiento ambiental, se ha proyectado la implementación de una red telemétrica para monitoreo de la calidad de agua del río Bogotá, en los 10 puntos, desde Villapinzón hasta Girardot. |

Expediente No. 25000-23-27-000-2001-0479-01  
Acumulados Nos. 2000-0428, 2001-0122, 2001-0343  
Actor: GUSTAVO MOYA ÁNGEL Y OTROS  
Acción Popular

|                                                                               |                           |                                                                                                                                                                                                                                                                                                                                                                                                                                                                                                                                                                                                   |
|-------------------------------------------------------------------------------|---------------------------|---------------------------------------------------------------------------------------------------------------------------------------------------------------------------------------------------------------------------------------------------------------------------------------------------------------------------------------------------------------------------------------------------------------------------------------------------------------------------------------------------------------------------------------------------------------------------------------------------|
| Convenio No. 354 de diciembre 30 de 1999, CAR Gobernación-Municipio de Bojacá | Cuenca Alta, Media y Baja | Suministro y adecuación de terrenos para construcción y operación de un sistema de disposición de residuos sólidos en el sector de Mondoñedo del Departamento de Cundinamarca. El predio fue entregado a la Gobernación mediante acta el 1 de noviembre de 2001, el contrato de concesión se otorgó al consorcio RELLENO SANITARIO NUEVO MONDOÑEDO y se firmó el 27 de diciembre de 2002, comprende los estudios y diseños, construcción y/o montaje, operación y mantenimiento, cierre, clausura y postclausura de las instalaciones del sistema de tratamiento y disposición final de residuos. |
| Cobro de tasa CAR                                                             | Cuenca Alta, Media y Baja | En la actualidad la CAR tiene identificados en toda la jurisdicción 491 usuarios los cuales están representados por los entes territoriales, sector curtiembres, industrias, manufacturera, sector avícola entre otros.                                                                                                                                                                                                                                                                                                                                                                           |

V.1.20. REGLAS DE GOBIERNO

Pasa en seguida a señalar unas **Reglas de Gobierno:** (fl. 41 cuaderno No. 7 proyectos de pacto de cumplimiento), para lo cual parte de la base de cada una de las acciones concretas de saneamiento, en un horizonte de tiempo muy definido, así:

V.1.20.1 CUENCA ALTA

|           |        |          |
|-----------|--------|----------|
| MUNICIPIO | ACCION | OBLIGADO |
|-----------|--------|----------|

Expediente No. 25000-23-27-000-2001-0479-01  
Acumulados Nos. 2000-0428, 2001-0122, 2001-0343  
Actor: GUSTAVO MOYA ÁNGEL Y OTROS  
Acción Popular

|                                      |                                                                            |                                                       |
|--------------------------------------|----------------------------------------------------------------------------|-------------------------------------------------------|
| Villapinzón y Chocontá               | Recuperación Ronda del Río.                                                | Municipio<br>CAR<br>Curtidores                        |
|                                      | Recuperación del páramo                                                    | Municipio<br>Gobernación<br>Agricultores<br>Ganaderos |
|                                      | Reubicación de los curtidores                                              | Gobernación<br>CAR<br>Municipio<br>Curtidores         |
|                                      | Planta de Cromo                                                            | Gobernación<br>CAR<br>Municipio<br>Curtidores         |
| Municipios de la cuenca alta y media | Optimización de los sistemas de tratamiento de aguas residuales existentes | CAR<br>Municipios                                     |
| Cota y Chía                          | Ampliación de la capacidad de tratamiento de la infraestructura existente. | CAR<br>Municipios                                     |

V.1.20.2. CUENCA MEDIA

|        |                                                                                                                                                         |
|--------|---------------------------------------------------------------------------------------------------------------------------------------------------------|
| Bogotá | La CAR expresa su voluntad de seguir apoyando dentro de los términos del parágrafo 2° del Artículo 44 de la Ley 99 la gestión de saneamiento ambiental. |
|--------|---------------------------------------------------------------------------------------------------------------------------------------------------------|

Expediente No. 25000-23-27-000-2001-0479-01  
Acumulados Nos. 2000-0428, 2001-0122, 2001-0343  
Actor: GUSTAVO MOYA ÁNGEL Y OTROS  
Acción Popular

|  |                                                                                                                                                                                                                                                                                                            |
|--|------------------------------------------------------------------------------------------------------------------------------------------------------------------------------------------------------------------------------------------------------------------------------------------------------------|
|  | Lo anterior, exige, de terminarse el Contrato de Concesión 250 que tenía como objeto el saneamiento del río Bogotá, la realización de un convenio interadministrativo que determine claramente las obligaciones a su cargo, la forma en que se manejan y ejecutan los recursos y el proyecto que se apoya. |
|--|------------------------------------------------------------------------------------------------------------------------------------------------------------------------------------------------------------------------------------------------------------------------------------------------------------|

V.1.21. ASOCIACIÓN DE MUNICIPIOS DE SABANA CENTRO  
- ASOCENTRO

| OBRAS / PLANES                                                                                                                                                                                                                 | CORTO<br>PLAZO<br>(Hasta 5 años) | MEDIANO<br>PLAZO<br>(De 5 a 10 años) | LARGO<br>PLAZO<br>(Desde 10 años) |
|--------------------------------------------------------------------------------------------------------------------------------------------------------------------------------------------------------------------------------|----------------------------------|--------------------------------------|-----------------------------------|
| Con la Planta de Asfalto se utiliza agua para el enfriamiento de la tubería y ésta es reutilizada y pasa por una planta de lodos los cuales pasan a una planta de tratamiento de secado. -<br><b>Actualmente en ejecución.</b> |                                  |                                      |                                   |
| Instalación y reposición de la cubierta de la planta de asfalto, para evitar que el material asfáltico sea arrastrado.                                                                                                         | X                                |                                      |                                   |
| Realización y limpieza controlada de una trampa de grasas para eliminar posibles                                                                                                                                               | X                                |                                      |                                   |

Expediente No. 25000-23-27-000-2001-0479-01  
Acumulados Nos. 2000-0428, 2001-0122, 2001-0343  
Actor: GUSTAVO MOYA ÁNGEL Y OTROS  
Acción Popular

|                                                        |  |  |  |
|--------------------------------------------------------|--|--|--|
| residuos de aceites a las<br>corrientes superficiales. |  |  |  |
|--------------------------------------------------------|--|--|--|

**V.1.22.MINISTERIO DE AGRICULTURA Y DESARROLLO RURAL**

- Formular el componente de sostenibilidad ambiental en la política agropecuaria
- Conservar los recursos hídricos de la cuenca del río Bogotá a través de la adecuación de tierras.
- Apoyar la conservación de los recursos forestales de la cuenca del río, a través de la cadena forestal y del apoyo de proyectos silvo pastoriles.
- Asistir técnicamente a los pequeños productores de la localidad de Bosa.
- Programa integral de transferencia de tecnología para la producción limpia de hortalizas.
- Impulsar los Sistemas Alternativos Agropecuarios como agricultura ecológica y la producción limpia a la cuenca del río..
- Difundir y capacitar sobre la política sectorial para la descontaminación del río Bogotá.

**V.1.23. MINISTERIO DE MINAS Y ENERGÍA**

- Crear parques minero ambientales, que deberán incluirse en el POT.
- Crear nuevas zonas competentes para realizar la actividad minera
- Realizar seguimiento especial y modificar la licencia ambiental.

Expediente No. 25000-23-27-000-2001-0479-01  
Acumulados Nos. 2000-0428, 2001-0122, 2001-0343  
Actor: GUSTAVO MOYA ÁNGEL Y OTROS  
Acción Popular

- Velar porque se dé estricto cumplimiento al numeral 3 del artículo 7 de la ley 756/02.
- Asistir técnicamente para la prestación eficiente de los servicios públicos domiciliarios y fomento para la optimización de sistemas de tratamiento de aguas residuales.
- Apoyar a los municipios que no han formulado su POT y que requieren ajustarlo
- Junto con el MAVDT, modificar y expedir la resolución definitiva 222/94 y contener en ella las principales definiciones como: materiales de construcción, arcillas, actividades mineras, zonas con viabilidad para la actividad minera, plan de manejo ambiental, plan de reestructuración ambiental y el POT.
- Junto con el MAVDT, incluir en las zonas con viabilidad para la actividad minera: títulos mineros vigentes, parques minero-industriales, áreas de uso minero establecidas en el POT, áreas definidas en el estudio PRODEA LTDA y sujetas al plan de legalización art. 165 ley 685/01, decreto 2390/02
- Junto con el MAVDT, adelantar un estudio entre el IDEAM e INGEOMINAS que determine la compatibilidad ambiental de las zonas de mayor potencial minero de la sabana de Bogotá.
- Propender porque las actividades que desarrollen las empresas del sector minero energético garanticen el desarrollo sostenible de los recursos naturales.
- Reforzar los convenios de producción más limpia y apoyar la conformación de agremiaciones de sectores productivos.

Expediente No. 25000-23-27-000-2001-0479-01  
Acumulados Nos. 2000-0428, 2001-0122, 2001-0343  
Actor: GUSTAVO MOYA ÁNGEL Y OTROS  
Acción Popular

- Garantía de la Nación a nuevos créditos.
- Capacitación para formulación de proyectos de manejo de aguas residuales y evaluación de proyectos presentados ante el FNR
- Fomento a la presentación de proyectos que puedan acceder a exención y certificación exención del IVA.
- Asistencia a mesas de coordinación y evaluación de alternativas para la descontaminación del río Río fomento para la creación de consejos de cuencas.
- Impulso a la formulación y desarrollo de un plan nacional de manejo de aguas residuales que oriente su gestión a áreas prioritarias como la cuenca del río Bogotá.

#### **V.1.24. MINISTERIO DE AMBIENTE VIVIENDA Y DESARROLLO TERRITORIAL**

- Seguimiento a la licencia ambiental otorgada por el ministerio al DAMA, para la construcción y operación de la planta de tratamiento de aguas residuales del salitre, entre otros.
- Apoyo a la gestión para la consecución de recursos económicos para programas y proyectos de descontaminación del río Bogotá.
- Promover la celebración de convenios de producción limpia
- Conceder incentivos tributarios, para la exclusión del IVA, en equipos destinados a control y monitoreo ambiental, que sean utilizados en la cuenca alta, media y baja del río Bogotá.

Expediente No. 25000-23-27-000-2001-0479-01  
Acumulados Nos. 2000-0428, 2001-0122, 2001-0343  
Actor: GUSTAVO MOYA ÁNGEL Y OTROS  
Acción Popular

- Consolidar las políticas y directrices nacionales, para construir los escenarios de participación de los actores involucrados
- Complementar el plan de manejo de la cuenca del río Bogotá, para la recuperación de humedales (decreto 1729/2002)
- Organizar y sistematizar la información que conlleve al registro de la reserva forestal protectora-productora-cuenca alta del río Bogotá.

#### **V.1.25. MINISTERIO DE LA PROTECCIÓN SOCIAL (INVIMA)**

- Fortalecimiento del trabajo intersectorial a través de la implementación de estrategias como política y observatorio ambiental, etc.
- Actualización normativa. (Decreto 475/98, CONPES 3177/02)
- Realizar inspección vigilancia y control de los establecimientos de mayor riesgo químico en salud pública con el fin de evitar efectos adversos en la comunidad.
- Vigilar y controlar las curtiembres ubicadas en la zona de San Benito, verificando las condiciones higiénicas sanitarias, de manejo ambiental, salud de los trabajadores, entre otros.
- Vigilar y controlar las plazas de mercado frente a la generación de residuos sólidos y líquidos.
- Inspección, vigilancia y control a plantas de beneficio aviar.

Expediente No. 25000-23-27-000-2001-0479-01  
Acumulados Nos. 2000-0428, 2001-0122, 2001-0343  
Actor: GUSTAVO MOYA ÁNGEL Y OTROS  
Acción Popular

- Inspección, vigilancia y control a plantas de sacrificio de bovinos y porcinos (Guadalupe, San Martín, ICTA, Usme)
- Vigilancia y control de famas en el Distrito Capital
- Vigilar y controlar el relleno sanitario de Doña Juana.
- Realizar control integrado de focos de residuos sólidos, líquidos y vectores.
- Intensificación de la vigilancia en Salud pública de los efectos adversos en la salud por la contaminación del río Bogotá.
- Desarrollar proyecto de vigilancia centinela de necesidades sentidas y observadas de la comunidad aledaña al río.
- Sensibilizar y capacitar a la comunidad aledaña a la ronda del río Bogotá

#### **V.1.26. MINISTERIO DE EDUCACIÓN**

- Continuar cumpliendo con las disposiciones legales en materia de educación ambiental.
- Asesorar a las secretarías de educación del departamento de Cundinamarca y del Distrito de Bogotá en los lineamientos generales de educación ambiental alrededor de la problemática del río Bogotá

Expediente No. 25000-23-27-000-2001-0479-01  
Acumulados Nos. 2000-0428, 2001-0122, 2001-0343  
Actor: GUSTAVO MOYA ÁNGEL Y OTROS  
Acción Popular

#### **V.1.27. MINISTERIO DE HACIENDA Y CREDITO PÚBLICO**

- Autorizar las operaciones de crédito público externo que se generen para proyectos de descontaminación del río Bogotá.

#### **V.1.28. CAR**

- Cumplir el parágrafo 2 del art. 44 ley 99 1993
- Servicio de la deuda con el BID.
- Proyectos de cofinanciación.
- Operación y mantenimiento de las PTAR existentes
- Producción más limpia con los sectores productivos del territorio CAR.
- Suministro y adecuación de terrenos para la construcción y operación de un sistema de disposición de residuos sólidos en el sector de Mondoñedo departamento de Cundinamarca.
- Operación, mantenimiento y automatización del control de los embalses del Sisga y Neusa.
- Red telemétrica (FNR-GOBERNACIÓN DE CUNDINAMARCA - CAR).
- Mantenimiento del río Bogotá
- Ordenación y manejo de la cuenca del río Bogotá.
- Desarrollo y fortalecimiento de una cultura ambiental.
- Construcción de nueva infraestructura y mejoramiento de la existencia para el saneamiento de la cuenca del río Bogotá.
- Ejecutar el plan maestro de alcantarillado y realizar interceptores.

Expediente No. 25000-23-27-000-2001-0479-01  
Acumulados Nos. 2000-0428, 2001-0122, 2001-0343  
Actor: GUSTAVO MOYA ÁNGEL Y OTROS  
Acción Popular

- Construir un pacto con el distrito, conservando la condición de autoridad ambiental y no avalando una solución técnica incierta.
- Modernización y ampliación de la red hidrometeorológica de la CAR.

#### **V.1.29. DISTRITO CAPITAL DE BOGOTÁ-DAMA**

- Participar en los programas de: control de la contaminación en la fuente, control integrado del recurso hídrico de Bogotá y tasas retributivas.
- Control de los efluentes industriales.
- Recuperación y preservación de la ronda para el control de fuentes difusas.
- Construcción, operación y mantenimiento de la PTAR canoas.

#### **V.1.30. INSTITUTO DE HIDROLOGÍA Y METEOROLOGÍA, "IDEAM"**

- Apoyar científica y técnicamente los estudios que se consideren necesarios. Y a las acciones que se emprendan para minimizar la contaminación del río Bogotá.

#### **V.1.31. ALPINA PRODUCTOS ALIMENTICIOS S.A.**

- Adopción de medidas internas que garanticen un mejor cumplimiento de las normas ambientales, en cuanto a vertimientos y posible afectación del río Bogotá.

Expediente No. 25000-23-27-000-2001-0479-01  
Acumulados Nos. 2000-0428, 2001-0122, 2001-0343  
Actor: GUSTAVO MOYA ÁNGEL Y OTROS  
Acción Popular

- Realizar obras internas encaminadas a la protección ambiental de aguas residuales en la planta de Sopó, PTAR II.

#### **V.1.32. ETERNIT COLOMBIANA S.A.**

- Adopción de medidas internas que garanticen el mejor cumplimiento de las normas ambientales, en cuanto a vertimientos y posible afectación del río Bogotá.
- Mantener vigente el certificado ambiental NTC ISO 14001.

#### **V.1.33. LIQUIDO CARBONICO COLOMBIANA S.A.**

- Adopción de medidas internas que garanticen un mejor cumplimiento de las normas ambientales, en cuanto a vertimientos y posible afectación del Bogotá.

#### **V.1.34. SOCIEDAD CRISTALERIA PELDAR S.A.**

- Vincularse a un proyecto de una organización sin ánimo de lucro que tenga relación con la descontaminación del río Bogotá.
- Continuar cumpliendo las normas vigentes en materia ambiental.
- Cumplir con las exigencias de la CAR y con el oportuno pago de las tasas retributivas y demás derechos que establezca la ley.

Expediente No. 25000-23-27-000-2001-0479-01  
Acumulados Nos. 2000-0428, 2001-0122, 2001-0343  
Actor: GUSTAVO MOYA ÁNGEL Y OTROS  
Acción Popular

- Aplicar tecnologías de protección al medio ambiente que beneficien a la sociedad
- Realizar programas de capacitación a todo nivel de empleados y directivos, buscando ampliar conciencia de proteger el medio ambiente.
- Establecer procedimientos internos que faciliten la protección al medio ambiente.

#### **V.1.35. REFINADORA SAL S.A. - REFISAL**

- Adopción de medidas internas que garanticen un mejor cumplimiento de las normas ambientales, en cuanto a vertimientos y posible afectación del río Bogotá.
- Vincularse a un proyecto de una organización sin ánimo de lucro que tenga relación con la descontaminación del río Bogotá.

#### **V.1.36. CERVECERIA LEONA S.A.**

- Adopción de medidas internas que garanticen un mejor cumplimiento de las normas ambientales, en cuanto a vertimientos y posible afectación del río Bogotá.
- Presentar un cronograma de implementación de medidas de gestión ambiental bajo la norma ISO 14001.
- Continuar vinculados con la CAR y con las organizaciones gubernamentales y no gubernamentales para llevar a cabo programas que permitan la recuperación del río Bogotá.

Expediente No. 25000-23-27-000-2001-0479-01  
Acumulados Nos. 2000-0428, 2001-0122, 2001-0343  
Actor: GUSTAVO MOYA ÁNGEL Y OTROS  
Acción Popular

#### **V.1.37. GRUPO SIDERURGICO DIACO S.A.**

- Adopción de medidas internas que garanticen un mejor cumplimiento de las normas ambientales, en cuanto a vertimientos y posible afectación del río Bogotá.
- Mantener vigente el certificado de Bureau Veritas en norma ISO 900.
- Mejorar diseño de cajas de recolección de los pozos sépticos.
- Independizar los vallados de Proalco y Muña mediante la construcción de una caja con cabezal de entrega de los vertimientos de Proalco, previa autorización de la CAR.
- Presentar informes anuales de caracterización de vertimientos en la descarga del vallado de Muña al colector general que descarga a la quebrada de Chucua.

#### **V.1.38.INDUSTRIAS SPRING S.A.**

- Unir esfuerzos y materializar conjuntamente el apoyo a la fundación AL VERDE VIVO, para que ésta mediante sus procesos de reforestación pueda contribuir a la recuperación del río Bogotá.
- Sembrar árboles para que mejore el medio ambiente de la ciudad y del río Bogotá.

Expediente No. 25000-23-27-000-2001-0479-01  
Acumulados Nos. 2000-0428, 2001-0122, 2001-0343  
Actor: GUSTAVO MOYA ÁNGEL Y OTROS  
Acción Popular

#### **V.1.39. SOCIEDAD STANTON & CÍA LTDA.**

- Adelantar las gestiones y trámites necesarios para obtener el certificado ISO 1400.
- Continuar convirtiendo sus sistemas de combustión a gas natural, siempre que sea económicamente viable
- Continuar con el desarrollo del Plan de Manejo Ambiental. Revisarlo cada dos años y si es necesario actualizarlo, aplicar tecnologías de protección al medio ambiente, siempre y cuando no afecten el equilibrio económico.
- Construir un comité ambiental, conformado por los gerentes administrativos de producción, general y de servicios.
- Invertir en actividades de protección al medio ambiente en el Embalse del Muña o en las riveras del río Bogotá en el área de Alicachín, una suma de \$20.000.000, que se invertirán en 10 cuotas cada una de dos millones de pesos, la primera en el 2004 y la ultima en el 2013.
- Realizar anualmente desde el 2004 hasta el 2013, la siembra de 100 árboles, en el lugar que la autoridad ambiental recomiende.

#### **V.1.40. SOCIEDAD PAPELES Y CORRUGADOS ANDINA S.A.**

- Seguir aplicando las normas vigentes en materia ambiental y conocer e implementar las que en el futuro se expidan.

Expediente No. 25000-23-27-000-2001-0479-01  
Acumulados Nos. 2000-0428, 2001-0122, 2001-0343  
Actor: GUSTAVO MOYA ÁNGEL Y OTROS  
Acción Popular

- Informar periódicamente a las autoridades ambientales el desarrollo y cumplimiento de los compromisos asumidos en este pacto.
- Estructurar y poner en funcionamiento un sistema de gestión ambiental.
- Establecer un comité de desarrollo de gestión ambiental e industrial, conformado por el gerente de la planta, el gerente general o su delegado, por un ingeniero ambiental y de mantenimiento de la planta.
- Adelantar un programa de buenas prácticas de manufactura
- Adelantar un programa de tratamiento de residuos líquidos y lodos.
- Establecer un programa de manejo de la madre vieja del Río.

#### **V.1.41.SOFASA S.A.**

- Continuar con el SGA en especial labores de capacitación.
- Obtener resultados positivos en las auditorias ISO 14001.
- Mantener el sistema de tratamiento en Chía según el estado de la técnica.
- Cumplir normas y recomendaciones de la CAR
- Vincularse a programas ambientales coordinados por la autoridad ambiental por \$3.000.000 al año desde el 2004.

Expediente No. 25000-23-27-000-2001-0479-01  
Acumulados Nos. 2000-0428, 2001-0122, 2001-0343  
Actor: GUSTAVO MOYA ÁNGEL Y OTROS  
Acción Popular

#### **V.1.42. E.A.A.B.**

- Modernizar el sistema de tratamiento de aguas residuales.
- Proyectar alcantarillado de aguas residuales.
- Diseñar y construir un sistema de aprovechamiento y tratamiento de los residuos sólidos domiciliarios.
- Implementar el manejo integral de los residuos hospitalarios y patógenos.
- Interceptor Engativa-Cortijo
- Interceptor Fucha-Tunjuelo
- Ejecutar el proyecto de control de inundaciones para el río Bogotá.
- Terminar la intercepción y control de las aguas residuales y lluvias, del sistema de alcantarillado sanitario y pluvial secundario de Bogotá.
- Realizar las obras relacionadas con el sistema de drenaje de la ciudad.

#### **V.1.43. EMPRESA DE ENERGÍA ELÉCTRICA S.A. E.S.P. Y EMGESA S.A. E.S.P.**

- Construcción del dique y vertedero direccional para aumentar el tiempo de permanencia del agua en el embalse. Para reducir los malos olores y acondicionar el agua para facilitar el control de mosquitos.
- Funcionamiento laguna anaerobia, cubierta de buchón
- Zona aerobia (aireación forzada)

**Expediente No. 25000-23-27-000-2001-0479-01**  
**Acumulados Nos. 2000-0428, 2001-0122, 2001-0343**  
**Actor: GUSTAVO MOYA ÁNGEL Y OTROS**  
**Acción Popular**

- Funcionamiento laguna macrofita, zona con densidad de 20 y 60 kg/m<sup>2</sup>
- Zona libre de buchón cercana a las colas (aireación)
- Acciones varias de las colas
- Mantenimiento reforestación
- Contrato guardabosques
- Fumigación y rodentización
- Monitoreo de mosquitos
- Monitoreo de aguas
- Divulgación a la comunidad
- Construcción barrera direccional
- Obras civiles o acciones relacionadas en el embalse para mejorar la calidad del agua o que sirvan de soporte para el mejoramiento del embalse.
- Operación y mantenimiento estación de bombeo y monitoreo instrumental
- Rectificación de cauces y vertimientos aguas servidas del Municipio de Sibaté.
- Reconformación de orillas y revegetalización
- Revegetalización herbacea, arbórea y arbustiva.
- Construcción y mantenimiento de cercas protectoras
- Vigilancia para evitar ingreso de personas y semovientes al Embalse.
- Adelantar la operación y mantenimiento de las obras, maquinaria y equipos hasta su entrega formal.

Expediente No. 25000-23-27-000-2001-0479-01  
Acumulados Nos. 2000-0428, 2001-0122, 2001-0343  
Actor: GUSTAVO MOYA ÁNGEL Y OTROS  
Acción Popular

#### **V.1.44. EMCOCABLES EN REESTRUCTURACIÓN**

- Prestar los equipos para los monitoreos trimestrales, para que la CAR pueda mirar el estado de contaminación del río Bogotá.
- Adelantar las gestiones necesarias para obtener el certificado ISO 14000 sobre el medio ambiente
- Conformar un grupo de trabajo compuesto por el gerente de planta y directores y jefes de área, coordinado por el representante de la gerencia, desarrollando actividades como capacitación y entrenamiento con una intensidad de 104 horas a cargo del coordinador ambiental y el representante de gerencia; capacitación del equipo de trabajo, lineamientos ISO 1400 y planificación ambiental.
- Sembrar 300 árboles en los predios de EMCOCABLES dentro de los 4 meses siguientes a la fecha en que quede en firme la providencia que apruebe el pacto.
- Continuar convirtiendo los sistemas de combustión a gas natural siempre que sea económicamente viable.

Expediente No. 25000-23-27-000-2001-0479-01  
Acumulados Nos. 2000-0428, 2001-0122, 2001-0343  
Actor: GUSTAVO MOYA ÁNGEL Y OTROS  
Acción Popular

## VI.

**ASPECTOS PRINCIPALES DE LAS INVESTIGACIONES ADELANTADAS TENIDOS EN CUENTA PARA LOS EFECTOS DE LA APROBACIÓN DE LOS PACTOS DE CUMPLIMIENTO COMO TAMBIÉN PARA LA TOMA DE LAS DEMÁS DECLARACIONES Y ÓRDENES A PROFERIR SOBRE LA SOLUCIÓN TÉCNICA ACORDADA CON LOS DIFERENTES ACTORES DEL PROCESO**

### **VI.1. DE LAS DIFERENTES ACCIONES Y OBRAS A REALIZAR PARA LA DESCONTAMINACIÓN DEL RÍO BOGOTÁ.**

Con el fin de establecer el estado de contaminación y su descontaminación del río Bogotá, se encuentran alternativas como:

- PROGRAMAS DE EDUCACIÓN AMBIENTAL-RECICLAJE.
- LA CONSTRUCCIÓN DE LOS PLANES MAESTROS Y ALCANTARILLADO DE CADA UNO DE LOS MUNICIPIOS QUE VIERTEN SUS AGUAS RESIDUALES DIRECTAMENTE O A TRAVÉS DE SUS AFLUENTES, LA AMPLIACIÓN DE LA PTAR SALITRE, LA CONSTRUCCIÓN DE LOS INTERCEPTORES Y COLECTORES DENTRO DEL D.C.
- LA CONSTRUCCIÓN DE LA ESTACIÓN ELEVADORA DE TUNJUELO Y DE CANOAS, DE LA PTAR DEL MISMO NOMBRE Y DEL INTERCEPTOR CANOAS-ALICACHÍN.
- EL DRAGADO DELRÍO : requiere un estudio del impacto ambiental de la disposición de lodos y frente a las

Expediente No. 25000-23-27-000-2001-0479-01  
 Acumulados Nos. 2000-0428, 2001-0122, 2001-0343  
 Actor: GUSTAVO MOYA ÁNGEL Y OTROS  
 Acción Popular

pruebas documentales allegadas por la EAAB dichos estudios e investigaciones fueron objeto de análisis por la mesa que se integró para efectos de establecer la SOLUCIÓN TÉCNICA INTEGRAL PARA LA DESCONTAMINACIÓN DEL río BOGOTÁ

## **VI.2. DE LAS PROYECCIONES DE LA POBLACIÓN, DE LAS CARGAS CONTAMINANTES Y DE LOS CAUDALES.**

Las conclusiones y la valoración probatoria se extraen de la MESA DE SOLUCIÓN TÉCNICA INTEGRAL PARA LA DESCONTAMINACIÓN DEL RÍO BOGOTÁ y de los siguientes cuadernos presentados por la EAAB en el proceso, todos los cuales fueron ordenados como pruebas, sin que las partes los controviertan con otras pruebas:

- EVALUACIÓN TÉCNICA DE LAS PLANTAS DE TRATAMIENTO DE AGUAS RESIDUALES DE "EL SALITRE" / UNIÓN TEMPORAL SANEAMIENTO RÍO BOGOTÁ (WATER RESEARCH CENTER). AGOSTO DE 2002.

El estudio que hace la EEAB, abarca todos los aspectos de la cuenca del Salitre y de la PTAR con énfasis en la actual y futura operación de la planta, además incluye el análisis de la capacidad última de la planta con la infraestructura para tratar el caudal generado en la cuenca Salitre, la disponibilidad y calidad de datos del afluente, el impacto del sistema de alcantarillado, descripción del sistema de tratamiento primario, los programas de muestreo, los programas de ensayos de sedimentación y el plan de desarrollo de la planta.

- COMPORTAMIENTO DE LA CUENCA MEDIA DEL RÍO BOGOTÁ CON CAUDALES BAJOS. (CARLOS ALBERTO GIRALDO LÓPEZ). JULIO DE 2003.

Expediente No. 25000-23-27-000-2001-0479-01  
 Acumulados Nos. 2000-0428, 2001-0122, 2001-0343  
 Actor: GUSTAVO MOYA ÁNGEL Y OTROS  
 Acción Popular

El objetivo primordial de este informe es la determinación del caudal mínimo aceptable del río Bogotá en su cuenca media de tal forma que permita los usos previstos a corto y mediano plazo; el análisis de los caudales, las alternativas de dragado y rectificación del Río y el análisis del comportamiento hidráulico, en el cual se concluye que la cuenca media es la de un cuerpo embalsado.

- AJUSTE DE DATOS PARA INFORME DE USO Y ESTÁNDARES DE CALIDAD DEL RÍO BOGOTÁ. (CARLOS ALBERTO GIRALDO LÓPEZ). MAYO DE 2003.

Describe la forma en que se realizó, los resultados y principales conclusiones del ajuste de los datos obtenidos de las 5 campañas de medición de la calidad del agua del río Bogotá realizadas por la Universidad de los Andes en los años 2001 y 2002, para posteriormente reasumir la situación actual de la calidad del agua del río Bogotá en cada una de sus subcuencas.

- MODELACIÓN PRELIMINAR DE LA CALIDAD DE AGUAS EN LOS INTERCEPTORES FUCHA- TUNJUELO, TUNJUELO- CANOAS Y DE LA CALIDAD DE AGUA DEL RÍO BOGOTÁ PARA LA CONDICIÓN CON Y SIN INTERCEPTORES. (LUIS ALEJANDRO CAMACHO). OCTUBRE DE 2003.

El objeto del estudio es realizar una modelación preliminar de la calidad del agua del río Bogotá con y sin interceptores y comparar la calidad del agua resultante para estas dos condiciones en Alicachín en el momento en que el efluente de la PTAR Canoas sea mezclado nuevamente con el agua del Río para su bombeo al Embalse del Muña con propósitos de generación de energía.

- PREDISEÑO PLANTA DE TRATAMIENTO DE AGUAS RESIDUALES CANOAS. (CARLOS ALBERTO GIRALDO LÓPEZ) JUNIO DE 2003.

El informe se refiere al prediseño de la Planta de Tratamiento de Aguas Residuales de Canoas con Tratamiento Primario Químicamente Asistido (TPQA) y capacidad de 20 m<sup>3</sup>/s de caudal medio diario, un sistema novedoso, moderno y eficiente que reduce la polución de las aguas residuales en cuanto a sólidos suspendidos y algunos

Expediente No. 25000-23-27-000-2001-0479-01  
 Acumulados Nos. 2000-0428, 2001-0122, 2001-0343  
 Actor: GUSTAVO MOYA ÁNGEL Y OTROS  
 Acción Popular

contaminantes asociados a ellos tales como: materia orgánica, fósforo, patógenos y metales pesados.

- DESINFECCIÓN DE EFLUENTES DE LAS PLANTAS DE TRATAMIENTO DE AGUAS RESIDUALES. (CARLOS ALBERTO GIRALDO LÓPEZ) MAYO DE 2003.

El estudio va ligado a los tipos de desinfección a través de los tratamientos Primarios, las técnicas de desinfección, el impacto ambiental, así como de los sistemas de desinfección para afluentes primarios.

- PROGRAMA DE SANEAMIENTO DEL RÍO BOGOTÁ, DEFINICIÓN DE LA ALTERNATIVA A SEGUIR. UNIÓN TEMPORAL SANEAMIENTO BOGOTÁ. "UTSRB". VERSION 01. JULIO DE 2003.

En el presente informe se presentan conclusiones de los estudios sobre los lineamientos que debe continuar con el Saneamiento del río Bogotá elaborados por la UT con el apoyo del Water Research Center del Reino Unido, basados en muestreos y análisis llevados a cabo por la Universidad de los Andes, referente a la descripción de la cuenca del río Bogotá y de sus alternativas, las características de la cuenca media, el nivel de tratamiento, Dimensionamiento de las alternativas, evaluación de los costos.

- MODELACIÓN DE LA CALIDAD DEL AGUA DEL RÍO BOGOTÁ. DICIEMBRE DE 2002.

El objetivo general del proyecto y de la investigación de la Universidad de los Andes y la EAAB es realizar mediciones de campo de la calidad del agua, y realizar un análisis del impacto del Río Magdalena que permitan implementar, calibrar y verificar un modelo de calidad del agua del río Bogotá que sirva como herramienta de planeación de su saneamiento.

- ESTUDIOS HIDRÁULICOS, GEOTÉCNICOS Y TOPOGRÁFICOS PARA DEFINIR EL NIVEL DE LOS JARILLONES Y OBRAS REQUERIDAS PARA MITIGAR EL RIESGO DE INUNDACIÓN DEL ríoBOGOTÁ EN EL TRAMO ALICACHÍN - LA CONEJERA. HIDROESTUDIOS S.A. INGENIEROS. MARZO DE 2000.

Expediente No. 25000-23-27-000-2001-0479-01  
 Acumulados Nos. 2000-0428, 2001-0122, 2001-0343  
 Actor: GUSTAVO MOYA ÁNGEL Y OTROS  
 Acción Popular

Este informe contiene los resultados de los análisis, estudios y cuatro anexos que contiene los resultados de los trabajos Topográficos, de los estudios Hidrológicos e Hidráulicos, de las investigaciones Geotécnicas de Campo y los resultados de las investigaciones Geotécnicas respectivamente.

Se consideraron los siguientes aspectos: la situación actual, el realce de los jarillones actuales, el efecto de la amortiguación de la Laguna la Magdalena para el río Fucha.

- ESTUDIO DE ACTUALIZACIÓN DEL PLAN MAESTRO DE ALCANTARILLADO DE LA CUENCA DEL FUCHA, DISEÑO DE OBRAS DE EXPANSIÓN, INTERCEPTOR RÍO RÍO BOGOTÁ - FUCHA- TUNJUELO, INFORME DE ALTERNATIVAS. HMV INGENIEROS. SEPTIEMBRE DE 2002.

Teniendo en cuenta las evaluaciones y consideraciones de tipo hidráulico, geotécnico, predial, costos, impacto urbano, ambiental y recomendaciones del asesor extranjero Mr. Abbott, la cual será evaluada por la EAAB-ESP definen el nivel de diseño básico, la localización elevadora de Tunjuelito, un posible medio para la construcción de un túnel con alternativas de conducción box precisando cual alternativa resulta ser más favorable.

- USOS Y ESTÁNDARES DE LA CALIDAD DEL RÍO BOGOTÁ. UNIÓN TEMPORAL SANEAMIENTO RÍO BOGOTÁ. AGOSTO DE 2002.

(Prueba aportada por la EAAB sobre la investigación en la materia que adelantó la Unión temporal de Saneamiento del río Bogotá, agosto de 2002. Ver el cuaderno respectivo)

Hace referencia al esquema simplificado del concepto de la sostenibilidad de los ecosistemas naturales, los usos y estándares de calidad de agua de la cuenca de río Bogotá, la situación actual y futura de la cuenca, calidad futura del Río - resultados cuantitativos.

Expediente No. 25000-23-27-000-2001-0479-01  
Acumulados Nos. 2000-0428, 2001-0122, 2001-0343  
Actor: GUSTAVO MOYA ÁNGEL Y OTROS  
Acción Popular

### **VI.3. CONCLUSIONES DE LOS USOS Y ESTÁNDARES DE LA CALIDAD DEL RÍO BOGOTÁ.**

El estudio concluye de manera general que, la situación actual del río Bogotá, dentro de las condiciones físicas actuales impide su capacidad de autodepuración y de asimilación, por ser muy reducida en comparación con la magnitud de carga contaminante que recibe, en especial, en su Cuenca Media y, que los principales problemas de calidad del río están asociados a la carga orgánica de origen doméstico, que recibe aún más cantidad que aquella proveniente afluentes de la actividad industrial.

#### **- ESQUEMA DE SANEAMIENTO**

Un esquema de saneamiento sería compatible si se adelantan obras, programas y acciones de tipo preventivo para mejorar la calidad y disminuir la cantidad de aguas residuales, como obras de carácter remedial, como INTERCEPTORES Y PTARS.

#### **- ESQUEMA INSTITUCIONAL**

En estos términos, se requiere crear un esquema institucional que tenga capacidad para desarrollar proyectos y llegar a acuerdos, en los cuales tengan participación los usuarios. De igual manera, se requiere crear un organismo de cuenca, así como estudiar el diseño más conveniente, usar instrumentos económicos como las tasas retributivas por vertimientos y, por consiguiente, reforzar la mesa de concertación interinstitucional dotando una secretaría especializada para formular y

Expediente No. 25000-23-27-000-2001-0479-01  
Acumulados Nos. 2000-0428, 2001-0122, 2001-0343  
Actor: GUSTAVO MOYA ÁNGEL Y OTROS  
Acción Popular

seguir el cumplimiento de los Planes de Manejo e informar a la Mesa de Concertación sobre sus avances y dificultades.

#### **- PLANEACIÓN REGIONAL**

Se debe generar una visión de Planeación Regional de manera estratégica como la CAR, el DC Y la Gobernación de Cundinamarca, que se plasme en un POT de la Cuenca del RB, y que sea adoptada por la Mesa de Concertación formada por instituciones ya citadas, así como adoptar planes de manejo multianuales, estableciendo metas en el tiempo que permitan mejorar paulatinamente la calidad del agua.

Frente a la calidad del agua, establecer normas donde el uso y las condiciones socioeconómicas de la región sean las mismas y no condiciones diferentes. De igual manera, frente al contenido alto de patógenos, es menester reducirlo por razones de salud pública.

### **VI.3.1. CONCLUSIONES ESPECÍFICAS**

#### **VI.3.1.1. SITUACIÓN ACTUAL DE LA CUENCA ALTA**

La situación actual que se produce en esta cuenca es determinante en lo que respecta a la calidad del río Bogotá, en especial, sobre el tramo de Villapinzón y sobre la cuenca media; las cargas de contaminación producen, a la entrada del DC, contenidos muy bajos de

Expediente No. 25000-23-27-000-2001-0479-01  
Acumulados Nos. 2000-0428, 2001-0122, 2001-0343  
Actor: GUSTAVO MOYA ÁNGEL Y OTROS  
Acción Popular

OD, e incluso anoxia para condiciones de caudales muy bajos; la demanda por agua es muy alta y los caudales disponibles en la cuenca media en época seca son muy bajos.

El alto contenido de patógenos es el principal factor de contaminación.

#### **VI.3.1.2. ESQUEMA DE SANEAMIENTO DE LA CUENCA ALTA**

El plan de acción mínimo debe realizar las obras y acciones que sean más probables y operen de manera técnica y eficiente la infraestructura. Además, es necesario que los municipios terminen los sistemas de alcantarillado, aumenten su cobertura y los conecten a las PTAR's correspondientes.

Igualmente, la CAR debe terminar con el programa de PTAR's, desarrollar programas efectivos de control de vertimientos industriales, en especial, con las curtiembres del área de Villapinzón y la empresa Papeles y Molinos, además de mejorar el control de vertimientos rurales no autorizados y buscar esquemas administrativos y financieros que hagan posible la entrega de las PTAR's a los municipios, y en el mismo sentido incluir el estudio del sistema de concesión o de gestión por operadores privados.

#### **VI.3.1.3. PLANEACIÓN REGIONAL**

La Planeación Regional debe lograrse por parte de la CAR y de los municipios para mejorar el aspecto estético y

Expediente No. 25000-23-27-000-2001-0479-01  
Acumulados Nos. 2000-0428, 2001-0122, 2001-0343  
Actor: GUSTAVO MOYA ÁNGEL Y OTROS  
Acción Popular

disminuir los vertimientos rurales directos al río (contaminación difusa).

De igual forma, es necesario ampliar los criterios del uso del agua de los embalses, con el objeto incluir la calidad como un factor de programación de desembalses.

#### **VI.3.2.1. SITUACIÓN ACTUAL DE LA CUENCA MEDIA**

La situación actual del Bogotá es que se encuentran peores índices de calidad en esta cuenca por su enorme carga contaminante, unida a las pobres condiciones físicas con que cuenta su autodepuración. Así mismo, se encuentra una alta contaminación con patógenos, la ausencia total de oxígeno disuelto y la presencia de basuras flotantes, grasas y olores.

El Embalse del Muña presenta una condición deplorable y grave desde la perspectiva ambiental, puesto que los requerimientos de agua para el Distrito de la Ramada son de  $3.1 \text{ m}^3/\text{s}$  y con la ampliación serían de  $5.3 \text{ m}^3/\text{s}$ . Por lo tanto, el volumen del agua que produciría la Cuenca del Salitre en tiempo seco sería de  $7.3 \text{ m}^3/\text{s}$  y el caudal del Río antes de entrar al DC es del orden de  $2.12 \text{ m}^3/\text{s}$ .

El caudal disponible para mantener el río Bogotá es del orden de  $4 \text{ m}^3/\text{s}$  después de ampliar el Distrito de Riego de la Ramada, el cual es suficiente para mantener un caudal sostenible en el tramo La Ramada-Canoas.

Expediente No. 25000-23-27-000-2001-0479-01  
Acumulados Nos. 2000-0428, 2001-0122, 2001-0343  
Actor: GUSTAVO MOYA ÁNGEL Y OTROS  
Acción Popular

#### **VI.3.2.2. ESQUEMA DE SANEAMIENTO DE LA CUENCA MEDIA**

La planta de tratamiento, El Salitre, se convierte en un factor fundamental para preservar el río Bogotá y en una fuente de agua para el Distrito de Riego de la Ramada, para lo cual debe ampliarse la capacidad de la planta El Salitre con inversiones moderadas, a fin de tratar todas las aguas residuales, logrando una calidad adecuada para los usos previstos del Río en las cuencas media y baja.

El esquema de interceptores para los afluentes de aguas residuales de las cuencas Fucha, Tunjuelo y Soacha es mucho más barato que el esquema de plantas de tratamiento, y su implementación es rápida, por lo que se logran beneficios ambientales en mucho menor tiempo.

#### **VI.3.3.1. SITUACIÓN ACTUAL DE LA CUENCA BAJA**

La situación actual del río Bogotá es que tiene una excelente capacidad de autodepuración en la parte inicial del tramo por su fuerte caída, así como por la aireación en la generación de energía, lo que mitiga considerablemente el impacto de la carga contaminante originada aguas arriba.

La parte inicial de la Cuenca Baja, el río Bogotá no cuenta con el caudal mínimo ecológico por la derivación total de su caudal hacia las plantas de generación de energía y no deja disponibilidad de agua para otros usos.

Expediente No. 25000-23-27-000-2001-0479-01  
Acumulados Nos. 2000-0428, 2001-0122, 2001-0343  
Actor: GUSTAVO MOYA ÁNGEL Y OTROS  
Acción Popular

Los malos olores son un fuerte impacto ambiental en este tramo, en especial, en los sitios de descarga de las tuberías de conducción a las plantas de generación.

#### **VI.3.3.2. ESQUEMA DE SANEAMIENTO DE LA CUENCA BAJA**

Esta parte de la cuenca es la más beneficiada con el programa de saneamiento del Río , como lo indican los resultados del modelo de simulación para el año 2012 en el escenario más probable.

De manera institucional es menester crear un espacio de comunicación y concertación con los municipios de la cuenca Baja.

### **VI.4. DE LOS INTERCEPTORES**

#### **VI.4.1. ALTERNATIVAS DEL INTERCEPTOR TUNJUELO - CANOAS. (CARLOS ALBERTO GIRALDO LÓPEZ) MAYO DE 2003**

En dicho estudio, se analizaron varias alternativas del interceptor Tunjuelo-Canoas, operando en conjunto con el interceptor Fucha-Tunjuelito, con la estación elevadora de Tunjuelo, EFT, la estación elevadora de Canoas y el emisario Alicachín. Además se revisan los antecedentes, los criterios de diseño utilizados, y la descripción detallada de la alternativa seleccionada.

Expediente No. 25000-23-27-000-2001-0479-01  
Acumulados Nos. 2000-0428, 2001-0122, 2001-0343  
Actor: GUSTAVO MOYA ÁNGEL Y OTROS  
Acción Popular

#### **VI.4.1.1. CONCLUSIONES Y RECOMENDACIONES DE LAS ALTERNATIVAS DEL INTERCEPTOR TUNJUELO-CANOAS.**

Hay alternativas que ofrecen algunas variaciones aparentemente beneficiosas y otras más costosas ante la mayor incertidumbre de excavación, aspecto que es determinante por las características del subsuelo en el trazado del interceptor Tunjuelo-Canoas.

El costo de la inversión inicial de la alternativa seleccionada es de 66.4 millones de dólares, discriminados en 45.5 millones del Interceptor Tunjuelo-Canoas, 0.3 millones de la Variante del Colector Ciudad de Cali y 20.6 millones de la inversión inicial de la Estación Elevadora de Canoas, cuyos costos variables se estiman en 47.9 millones de dólares.

Las características del Interceptor Tunjuelo-Canoas correspondiente a la alternativa seleccionada muestran una sección transversal en forma de cajón de concreto, box culvert, de dos celdas con una base de 4.25 m por 3.30 m de altura, con una longitud de 8.6 km hasta el sitio definido preliminarmente para la Estación Elevadora de Canoas.

El recubrimiento inicial del interceptor es 1.0 m aproximadamente y en la entrega a la Estación Elevadora es 3.0 m, con una profundidad promedio de excavación de 5.70 m. Esta condición de recubrimiento relativamente bajo, impone una restricción para el paso interceptor por debajo del río Bogotá si se quiere localizar en la margen derecha la Estación Elevadora y las instalaciones de la

Expediente No. 25000-23-27-000-2001-0479-01  
Acumulados Nos. 2000-0428, 2001-0122, 2001-0343  
Actor: GUSTAVO MOYA ÁNGEL Y OTROS  
Acción Popular

PTAR de Canoas, lo cual implicaría volverlo a cruzar para entregar a la estación de bombeo de Alicachín en la margen izquierda, para evitar la descarga directa al Río.

Esta situación genera, además, la profundización del interceptor, el consiguiente aumento de la cabeza dinámica y el costo de la Estación Elevadora, que evidentemente no son atractivos. Para evitar este inconveniente se plantea la rectificación del río en el sector de Canoas, con lo cual se podría habilitar un corredor más corto para el interceptor, evitando a la vez, la profundización.

Es necesario indicar que la prolongación del interceptor Tunjuelo - Canoas genera a su vez la reducción de la longitud del Emisario Canoas-Alicachín, cuyo trazado en perfil se recomienda más superficial para garantizar el drenaje en condiciones críticas, para lo cual se estableció la descarga del Emisario con la cota 2567.50 msnm del sistema EAAB, 2537.64 msnm IGAC, que corresponde a la cota mínima de operación de la estación Elevadora de Alicachín.

El realce del Emisario favorece el funcionamiento hidráulico; sin embargo, hace que sobresalga del terreno plano en el corredor seleccionado, por lo cual es necesario desplazar su trazado hacia la pata de las laderas de los predios que se encuentran en dirección hacia la Autopista Sur, de manera que alcance a quedar oculto en el terreno y no se convierta en un obstáculo para el drenaje natural durante su recorrido.

Expediente No. 25000-23-27-000-2001-0479-01  
Acumulados Nos. 2000-0428, 2001-0122, 2001-0343  
Actor: GUSTAVO MOYA ÁNGEL Y OTROS  
Acción Popular

#### **VI.4.2. POBLACIÓN, CAUDALES Y CARGAS CONTAMINANTES. UNIÓN TEMPORAL SANEAMIENTO DEL RÍO BOGOTÁ. AGOSTO DE 2002.**

El informe presenta un estudio de la población, caudales y cargas contaminantes de la ciudad de Bogotá D. C. y del Municipio de Soacha, localizados en el trayecto denominado "Cuenca Media del río Bogotá", sobre la margen oriental de éste. La cuenca media se extiende desde la estación La Virgen sobre el Río, en inmediaciones del Municipio de Cota, hasta Alicachín".

Para el Municipio de Soacha se consultaron los "*Estudios Técnicos, Plan Maestro de Alcantarillado para el Municipio de Soacha, informe final, Elaborado para la Gobernación de Cundinamarca y la EAAB, Bogotá D.C., 2001*".

Las cifras del estudio Bogotá y Cundinamarca. Expansión y Sostenibilidad, "*Elaborado para la Corporación Autónoma de Cundinamarca, CAR, Bogotá D.C., 2000*."

Físicamente la ciudad de Bogotá, está conformada por cuatro grandes cuencas de drenaje sanitario, como se muestra en la Figura 1.1:

#### **EXTENSIÓN**

**Cuenca Torca** 1,397 ha (hectáreas).

**Cuenca Salitre**, incluye las cuencas de Conejera y Jaboque- 12,518 ha.

**Cuenca Fucha**, incluye parte de la Cuenca Tintal- 14,731 ha.

Expediente No. 25000-23-27-000-2001-0479-01  
Acumulados Nos. 2000-0428, 2001-0122, 2001-0343  
Actor: GUSTAVO MOYA ÁNGEL Y OTROS  
Acción Popular

**Cuenca Tunjuelo**, incluye el resto de la Cuenca Tintal-10,039 ha.

El drenaje de estas cuencas tiene lugar en sentido oriente occidente, mientras que el río Bogotá discurre en sentido norte sur, constituyéndose en el límite occidental tanto del Distrito Capital como del casco urbano de Soacha.

**La Cuenca Torca** incluye la zona de Guaymaral: cuyo desarrollo fue restringido por el (P.O.T.), aprobado según el Decreto 619 de Julio 28 de 2000, con vigencia hasta el año 2009.

"Las redes troncales de los sistemas de alcantarillado sanitario se desarrollan paralelas a los ejes de drenaje de cada cuenca, como son el RÍO SALITRE en la cuenca del mismo nombre y en la CUENCA TORCA, EL RÍO FUCHA y el RÍO RÍO TUNJUELO en las cuencas de igual nombre.

La **cuenca Salitre**, actualmente, y **Torca**, próximamente, llegan hasta la planta de tratamiento de aguas residuales del Salitre, **mientras que las redes de las demás cuencas llegan directamente a los ríos y éstos, a su vez, conducen las aguas hasta el río Bogotá.**

Se establecieron las proyecciones de población y demanda de agua potable en cada una de las cuencas y a partir de éstas se estimaron sus aportes de aguas residuales utilizando la base de datos del **estudio Actualización de la Proyección de la Demanda de Agua<sup>1</sup>**; y las áreas de drenaje definidas en los estudios Actualización del Plan

Expediente No. 25000-23-27-000-2001-0479-01  
Acumulados Nos. 2000-0428, 2001-0122, 2001-0343  
Actor: GUSTAVO MOYA ÁNGEL Y OTROS  
Acción Popular

**Maestro de Alcantarillado para las Cuencas de Salitre, Jaboque y Fucha<sup>2</sup>; y Diseño Detallado del interceptor Tunjuelo Bajo<sup>3</sup>.**

1 TEA Ltda. Estudio de Actualización de la proyección de la demanda de agua, Informe Ejecutivo. Elaborado para la EAAB, Bogotá D.C. 1999.

2 Hidroestudios S.A. Estudio de Actualización del plan maestro de alcantarillado para las cuencas de Salitre, Jaboque y Fucha, Versión preliminar. Elaborado para la EAAB, Bogotá D.C. 2001.

3 HC, Ingenieros Consultores Ltda. Elaboración de los Diseños Detallados para la Construcción de los Interceptores Tunjuelo Alto Derecho, Tunjuelo Bajo Derecho, Tunjuelo Bajo Izquierdo y Redes Complementarias. Actualmente en elaboración la EAAB, Bogotá D.C. 2001.

4 Estudios Técnicos, Plan Maestro de Alcantarillado para el Municipio de Soacha, informe final, Elaborado para la Gobernación de Cundinamarca y la EAAB, Bogotá D.C., 2001.

5 Preciado P. A., Bogotá y Cundinamarca. Expansión y Sostenibilidad, Elaborado para la Corporación Autónoma de Cundinamarca, CAR, Bogotá D.C., 2000.

Se resalta la recopilación y análisis de las cifras de población proyectada para Bogotá y Soacha obtenidas de los estudios y planes maestros citados, y complementadas con reportes de otras entidades gubernamentales como el Departamento Administrativo Nacional de Estadísticas

Expediente No. 25000-23-27-000-2001-0479-01  
Acumulados Nos. 2000-0428, 2001-0122, 2001-0343  
Actor: GUSTAVO MOYA ÁNGEL Y OTROS  
Acción Popular

DANE, el Departamento de Planeación Distrital DAPD, la Corporación autónoma de Cundinamarca CRA y el Departamento Nacional de Planeación.

## **VI.5. PROYECCIÓN**

### **VI.5.1. PROYECCIONES PARA BOGOTÁ D. C**

#### **VI.5.1.1. Estudio de TEA-99**

Denominado así, por la Actualización de la proyección de la demanda de agua, realiza un ajuste y proyección de la población y vivienda hasta el año 2020 y saturación, a partir del "*Estudio de Población y Demanda para la Ciudad de Santa Fe de Bogotá*", elaborado por TEA-CIC para la EAAB en 1997, el cual se denomina, genéricamente, estudio de TEA-97.

Los estudios de TEA-97 y de TEA-99 establecen proyecciones de la población, la demanda de agua potable de la ciudad de Bogotá D.C. y de los municipios circunvecinos, como una herramienta fundamental de la Empresa de Acueducto y Alcantarillado, EAAB ESP para el planeamiento de sus funciones y operaciones.

#### **VI.5.1.2. ESTUDIO DE HIDROESTUDIOS S. A**

El estudio de actualización del plan maestro de alcantarillado de la CUENCAS SALITRE, JABOQUE Y FUCHA, que actualmente se encuentra en elaboración por parte de Hidroestudios S.A., presenta en el informe de Estimación

Expediente No. 25000-23-27-000-2001-0479-01  
Acumulados Nos. 2000-0428, 2001-0122, 2001-0343  
Actor: GUSTAVO MOYA ÁNGEL Y OTROS  
Acción Popular

de la Producción de Aguas Residuales, el ajuste de las proyecciones de población de la ciudad hasta el 2020 y a saturación, considerando las restricciones planteadas por el POT del Distrito.

Dicho estudio se basó en el escenario de población POT de TEA-99 hasta el 2020 y la saturación, y realizó el cruce con los límites de las cuencas de drenaje sanitario, teniendo en cuenta, además, los límites de expansión que definió el POT, determinando la población al 2020 y la saturación que albergará cada cuenca.

Este estudio no incluye el análisis de las poblaciones para las CUENCAS TINTAL Y TUNJUELO, sin embargo, establece un porcentaje a la CUENCA DE TUNJUELO AL 2020 originada por la restricción de crecimiento del borde norte establecida por el POT.

#### **VI.5.1.3. INFORMACIÓN DEL DANE**

La información suministrada se utilizó como punto de referencia para cotejar los estudios de población de la ciudad de Bogotá y el Municipio de Soacha.

Además se recopiló información de las Proyecciones de Población total por Municipios según el Dane, información del "POT- D.C.", y Proyección de la Población Total del Distrito Capital.

Expediente No. 25000-23-27-000-2001-0479-01  
Acumulados Nos. 2000-0428, 2001-0122, 2001-0343  
Actor: GUSTAVO MOYA ÁNGEL Y OTROS  
Acción Popular

## **VI.5.2. PROYECCIONES PARA EL MUNICIPIO DE SOACHA**

### **VI.5.2.1. ESTUDIO DE TEA-99**

Tanto el Municipio de Soacha como el estudio de TEA-99, también contienen proyecciones de población, similares a las proyecciones de la ciudad de Bogotá D.C., considerando, además, tendencias regionales de municipios y del departamento. Las cifras de estudio son referentes a Proyecciones de Población Total del Municipio de Soacha, según TEA-99, información del DANE, Proyecciones de Población Total por municipios, según DANE.

Sin embargo, la publicación "*Bogotá y Cundinamarca. Expansión y Sostenibilidad*" presenta otras cifras del DANE de las Proyecciones ajustadas de Población Total por municipios según DANE, Información de la Gobernación de Cundinamarca, Proyecciones de Población Total Municipio de Soacha, según Gobernación de Cundinamarca, Información del Plan Maestro de Alcantarillado de Soacha, Proyecciones de Población Total Municipio de Soacha, según Estudio del Plan Maestro de Alcantarillado de Soacha, por Estudios Técnicos. Año 2001, Plan de Ordenamiento Territorial de Soacha, Proyecciones de Población Total Municipio de Soacha, según POT del municipio.

## **VI.6. ANÁLISIS DE TENDENCIAS DE POBLACIÓN**

Las proyecciones de población recomiendan metodologías y análisis como la obtenida por la Unión Temporal "UT" para la ciudad de Bogotá, donde se indica que la base de datos

Expediente No. 25000-23-27-000-2001-0479-01  
Acumulados Nos. 2000-0428, 2001-0122, 2001-0343  
Actor: GUSTAVO MOYA ÁNGEL Y OTROS  
Acción Popular

de TEA-99 agrupa, en tres categorías, 6 estratos socioeconómicos existentes en la ciudad: el estrato bajo agrupa a los estratos socioeconómicos 1, 2 y 3; el estrato medio corresponde al estrato socioeconómico 4; el estrato alto agrupa a los estratos socioeconómicos 5 y 6, de acuerdo con lo establecido en la población de Guaymaral por distribuir las otras tres cuencas, se divide por estratos.

Los sectores censales de Guaymaral restringidos por el POT tendrían una capacidad a saturación de 962,853 habitantes, lo cual, finalmente, corresponde a la capacidad de ocupación que la ciudad pierde a largo plazo, debido a que el resto de la ciudad mantiene constante su capacidad de saturación o su máxima densidad poblacional.

#### **VI.6.1. TENDENCIAS PARA BOGOTÁ D.C.**

Dentro del análisis se resumieron las cifras, las cuales permiten apreciar que todas las proyecciones tienen unos rangos de variación no muy notorios y, en razón de ello se puede afirmar que, las tendencias son similares. Sin embargo, se observa una diferencia en los topes de saturación de los análisis, es decir, el estudio de TEA-99 que alcanza la cifra de 11'165.190 habitantes, versus el ejercicio de la Unión Temporal con el ajuste al POT-2000 que alcanza los 10'226.029 habitantes.

Las tendencias hasta el año 2020 son similares y las proyecciones del POT y de TEA-99. Incorporan políticas de

Expediente No. 25000-23-27-000-2001-0479-01  
Acumulados Nos. 2000-0428, 2001-0122, 2001-0343  
Actor: GUSTAVO MOYA ÁNGEL Y OTROS  
Acción Popular

crecimiento impuestas, recomendando adoptar la proyección de población ajustada del POT de 2000, obtenida por la Unión Temporal.

#### **VI.6.2. SENSIBILIZACIÓN DEL LÍMITE DE SATURACIÓN DE BOGOTÁ**

Debido a la posibilidad de que las restricciones sobre el borde norte puedan cambiar luego de cumplirse la vigencia del POT en el año 2009, es necesario sensibilizar el límite de saturación de la ciudad.

Al respecto se prevé que la actual restricción de desarrollo del borde norte puede generar el crecimiento de asentamientos subnormales o ilegales en esta zona en el mediano plazo, por la escasez de tierras en el resto de las cuencas. "Esta situación fue impuesta por el Ministerio del Medio Ambiente al POT Distrital".

Expediente No. 25000-23-27-000-2001-0479-01  
Acumulados Nos. 2000-0428, 2001-0122, 2001-0343  
Actor: GUSTAVO MOYA ÁNGEL Y OTROS  
Acción Popular

### **VI.6.3. TENDENCIAS PARA EL MUNICIPIO DE SOACHA**

Por su parte, se siguió el mismo procedimiento a fin de observar las distintas proyecciones, donde muestran una gran dispersión en las tendencias de las distintas proyecciones, con valores que fluctúan entre 617.000 y 920.000 habitantes aproximadamente en el año 2020, que son aproximadamente, el doble y el triple de la población actual. Sin embargo, para profundizar en los detalles de éste se recomienda consultar directamente el mencionado estudio.

### **VI.6.4. PROYECCIONES DE POBLACIÓN DEL MUNICIPIO DE SOACHA, SEGÚN DIFERENTES FUENTES.**

Dichas investigaciones se nutrieron de los resultados de dos campañas de muestreo de calidad de agua con medición de caudal, realizados en diversos puntos de la red de alcantarillado de la ciudad, principalmente, en canales y en algunos colectores, que permitieron conocer las condiciones de calidad en tiempo seco y durante eventos lluviosos en varios de estos puntos.

Adicionalmente, se tuvieron en cuenta los registros de precipitación de múltiples estaciones de lluvias localizadas en las cuencas que permitieron hacer el seguimiento durante un periodo de simulación de 13 años, utilizando los resultados de la calibración del modelo PCSWMM, y se determinaron los caudales que ingresaron a los canales directamente, por los colectores de sistemas pluviales, y en los aliviaderos de los sistemas

Expediente No. 25000-23-27-000-2001-0479-01  
Acumulados Nos. 2000-0428, 2001-0122, 2001-0343  
Actor: GUSTAVO MOYA ÁNGEL Y OTROS  
Acción Popular

combinados. Así mismo, se estableció el efecto en la calidad del agua por el arrastre de material que se deposita en las calles y que es llevado al alcantarillado durante los eventos lluviosos.

#### **VI.6.5. CONEXIONES DE LLUVIAS SEGÚN LA UNIÓN TEMPORAL**

Se considera que parte de la escorrentía de la lluvia urbana llega a los colectores finales y emisarios y otra parte rebosa por las estructuras de alivio que, junto con el agua rural, fluye por los canales que, obviamente, no drenan a los colectores finales o emisarios y, por lo tanto no llegarían a las plantas de tratamiento.

La propuesta por la UT consiste en considerar que el 80% del volumen de aguas lluvias urbanas, será admitido en las redes sanitarias y el 20% restante serán vertidos hacia los canales. De acuerdo con lo anterior, para estimar el caudal por conexiones de las lluvias que llegarían a las plantas de tratamiento, se tendría la proporción respecto al volumen de aguas sanitarias, interpretado en términos de caudales.

#### **VI.7. DE LOS COMPONENTES DE LAS ALTERNATIVAS**

(Con base en el estudio poblacional acabado de relacionar, las investigaciones apuntan hacia las alternativas a seguir así (ver cuaderno "Estudios Técnicos Noviembre de 2003").

Expediente No. 25000-23-27-000-2001-0479-01  
Acumulados Nos. 2000-0428, 2001-0122, 2001-0343  
Actor: GUSTAVO MOYA ÁNGEL Y OTROS  
Acción Popular

Este informe tiene como propósito, presentar de manera clara y objetiva, el proceso de estudio y los resultados obtenidos, que sustentan la propuesta de la posición del Departamento, CAR, Distrito para el desarrollo de saneamiento del río Bogotá, de manera tal, que resume los resultados del informe de Usos y Estándares de la calidad del agua del río Bogotá, y además permite conocer la importancia, la metodología y los actores involucrados en el desarrollo del estudio.

De igual forma, presenta dos alternativas principales: la primera es la alternativa de las Tres Plantas y la segunda es la alternativa de dos plantas consideradas, y sus sub-alternativas que destacan los diversos componentes que las integran, a saber: plantas de tratamiento de aguas residuales, tanto existentes como proyectadas, interceptores construidos y en proyecto, tanto del sistema de saneamiento como del sistema de alcantarillado de la ciudad, estaciones elevadoras y pondajes.

De los análisis realizados se confirma que, el esquema de 1993, descrito en el actual POT, es muy desfavorable para la ciudad y por ningún motivo se debe continuar con él, ya que busca llegar a niveles de tratamiento secundario muy costosos, que no agregan valor al recurso hídrico.

El principal defecto de la alternativa es su insuficiencia de capacidad para tratar la totalidad de las aguas servidas producidas por la ciudad y, por consiguiente, vertimiento parcial en forma directa al río Bogotá, lo que invalida el efecto positivo de las PTAR's.

Expediente No. 25000-23-27-000-2001-0479-01  
Acumulados Nos. 2000-0428, 2001-0122, 2001-0343  
Actor: GUSTAVO MOYA ÁNGEL Y OTROS  
Acción Popular

En las circunstancias previstas en el horizonte de diseño del esquema del saneamiento, el tratamiento primario químicamente asistido es el más adecuado y por tanto se ha reformulado la alternativa de 1993 de tres plantas hacia esta posibilidad y se ha comparado con la alternativa de dos plantas, la cual a su vez considera dos sub-alternativas, una con la segunda planta en Canoas.

El análisis económico indica que la alternativa más atractiva es la de dos plantas ubicadas en Salitre y Canoas, mientras que la menos favorable es la de tres plantas con tratamiento primario y secundario. Por ello, debe adoptarse la primera para continuar con el saneamiento del río Bogotá. Esta alternativa presenta los menores costos con iguales beneficios ya que logra el saneamiento de la cuenca media entre 6 y 9 años más temprano que con las otras alternativas.

Por otra parte, el interceptor que recoge las aguas de las cuencas de Fucha, Tunjuelo y Soacha tiene un efecto de remoción de carga contaminante sobre el Río en su cuenca media, muy superior al tratamiento de las plantas. Lo anterior permite realizar inversiones futuras para mejorar el afluente de la PTAR Salitre, y no sobre el de toda la ciudad, para llevarlo a niveles de calidad superiores y darles usos cada vez más exigentes.

Es importante señalar que, si se hace uso de una capacidad natural de depuración, bien sea en el río Bogotá o en el Embalse del Muña, mediante la cual se remueva la carga contaminante de la cuenca media, estos

Expediente No. 25000-23-27-000-2001-0479-01  
Acumulados Nos. 2000-0428, 2001-0122, 2001-0343  
Actor: GUSTAVO MOYA ÁNGEL Y OTROS  
Acción Popular

servicios deberán compensarse económicamente de manera adecuada para reducir los impactos ambientales, tanto en ellos como sobre su entorno.

La CAR ha planteado una iniciativa para mejorar la calidad ambiental de la cuenca del río Bogotá, desde la perspectiva de la ciudad-región, coordinando las competencias y capacidades de las diversas entidades involucradas, mediante un plan de acción integrado que debe analizarse y desarrollarse prioritariamente.

## **VI.8. DEL DISTRITO DE RIEGO LA RAMADA Y DEL DRAGADO DEL RÍO BOGOTÁ**

(Ver cuaderno Programa de Saneamiento del río Bogotá, Definición de la alternativa a seguir, Versión 01, Unión Temporal Saneamiento del río Bogotá, Julio 2003)

### **VI.8.1. COMPORTAMIENTO HIDRÁULICO DEL RÍO**

Para determinar el comportamiento hidráulico del Río con caudales bajos menores a  $8\text{m}^3/\text{s}$  y obtener una aproximación al caudal mínimo base que debe fluir por el Río para que se logre la apariencia de un río aceptable en las mejores condiciones hidráulicas, se estudiarán tres escenarios:

**a) Estado Actual del Río:** Este escenario corresponde a la geometría y abscisado que representa las condiciones actuales, para el sector Conejera- Alicachín en un tramo de casi 60 km.

Expediente No. 25000-23-27-000-2001-0479-01  
Acumulados Nos. 2000-0428, 2001-0122, 2001-0343  
Actor: GUSTAVO MOYA ÁNGEL Y OTROS  
Acción Popular

**b) Alternativa de Dragado del Río:** esta alternativa fue contemplada en HIDROESTUDIOS 2000, basada en la opción de Dragado mayor y Relocalización del jarillón Izquierdo, la cual consistió en profundizar el fondo del Río mediante un dragado para el sector Conejera- Alicachín y conservar un ancho mínimo de la base de la sección, con el fin de mitigar el riesgo de inundación del río Bogotá en el tramo Alicachín - Humedal la Conejera.

**c) Alternativa de Rectificación del Río:** Esta alternativa fue contemplada en HIDROESTUDIOS en 1985, con el fin de resolver el problema de protección contra las inundaciones en el sector Alicachín - Juan Amarillo.

El informe Caudal Sostenible del río Bogotá presenta los resultados del estudio del comportamiento hidráulico del río Bogotá, simulando sus condiciones bajo cada uno de los escenarios considerados para un rango de caudales crítico.

De acuerdo al análisis de disponibilidad de caudales y para todos los escenarios se asumió que en este tramo fluían caudales bajos que variaron entre  $1\text{m}^3/\text{s}$  y  $8\text{m}^3/\text{s}$ , correspondiente al efluente de la Planta de tratamiento de Aguas residuales "El Salitre".

En el análisis de estos escenarios se contemplaron tres condiciones de frontera:

- Compuertas de Alicachín Cerradas, esto es considerar el nivel de control de las compuertas a la cota actual igual a 2569 msnm.

Expediente No. 25000-23-27-000-2001-0479-01  
Acumulados Nos. 2000-0428, 2001-0122, 2001-0343  
Actor: GUSTAVO MOYA ÁNGEL Y OTROS  
Acción Popular

- Compuertas de Alicachín Cerradas a la cota mínima igual a 2567.46 msnm, esto corresponde al nivel de operación de agua frente a la toma en situaciones de bombeo.
- Sin control en Alicachín, esto es considerar una profundidad crítica en el sitio del vertedero.

## **VI.8.2. ANÁLISIS HIDROLÓGICOS**

### **VI.8.2.1 ANÁLISIS EFECTUADOS**

Los análisis efectuados se encaminaron inicialmente a evaluar los siguientes aspectos considerados básicos en el desarrollo del estudio:

- Evolución del cauce del río.
- Efectos de la localización de las tormentas FUSAL Y TORCA.
- Efecto de la operación de las compuertas de Alicachín.

Una vez estudiados los aspectos anteriores, se procedió a analizar el funcionamiento hidráulico del Río bajo las diversas hipótesis consideradas en el desarrollo del estudio. Estos análisis cubrieron los siguientes aspectos:

- Situación actual.
- Realce de los jarillones actuales.

Expediente No. 25000-23-27-000-2001-0479-01  
Acumulados Nos. 2000-0428, 2001-0122, 2001-0343  
Actor: GUSTAVO MOYA ÁNGEL Y OTROS  
Acción Popular

- Efecto de la amortiguación de la Laguna la Magdalena para el Río Fucha.
- Efecto de la relocalización del jarillón izquierdo a aproximadamente 30m de la orilla del Río. La orilla se define a partir del nivel de agua correspondiente al caudal con periodo de retorno de 5 años, para tormenta FUSAL sin amortiguación.
- Efecto de la relocalización del jarillón izquierdo y de la amortiguación de la Laguna la Magdalena.
- Efecto del dragado de la sección del Río y relocalización del jarillón.

#### **VI.8.2.2. SITUACIÓN ACTUAL**

Se procedió a estimar la capacidad hidráulica del cauce en las condiciones actuales. Para el efecto, se calcularon los perfiles hidráulicos para caudales con periodos de recurrencia de 5 y 10 años en las condiciones consideradas como más severas, o sea, tomando de la tormenta FUSAL sin amortiguación y suponiendo el nivel de agua en Alicachín a la cota 2569. En los resultados se puede apreciar que para establecer con precisión un determinado periodo de retorno de desbordamiento, se puede anotar que dicho periodo tendrá una duración entre 5 y 10 años.

#### **VI.8.2.3. EFECTO DEL DRAGADO DE LA SECCIÓN DEL RÍO Y DE LA RELOCALIZACIÓN DEL JARILLÓN IZQUIERDO**

En los análisis anteriores se consideraron, básicamente, el realce y la relocalización del jarillón izquierdo sin afectar la sección del cauce. Dados los resultados

Expediente No. 25000-23-27-000-2001-0479-01  
Acumulados Nos. 2000-0428, 2001-0122, 2001-0343  
Actor: GUSTAVO MOYA ÁNGEL Y OTROS  
Acción Popular

obtenidos en dichos análisis, se procedió a estudiar el efecto de profundizar el fondo del Río mediante un dragado, relocalizando el jarillón izquierdo.

Los resultados de estos análisis corresponden a las modelaciones 9 y 10 que se presentan en el anexo 2, en las que se modeló el efecto conjunto de la sección dragada y de la relocalización del jarillón izquierdo.

Teniendo en cuenta la configuración topográfica general del cauce en cada uno de los tramos en los cuales se subdividió el análisis, para cada tramo, se adoptó una determinada anchura de la sección dragada. Así mismo, con el propósito de evaluar el efecto de dicha anchura, los análisis contemplaron dos opciones de dragado consistentes en que la anchura de la sección en cada tramo varía, entre ambas opciones, en 5 m.

El perfil general del fondo dragado, correspondiente a las dos opciones de dragado consideradas, se proyectó con base en los puntos más profundos del fondo actual. Siguiendo la tendencia general de las pendientes del cauce, para el dragado se adoptó una pendiente de 6 centímetros por kilómetro (6X10) para el tramo comprendido entre esta confluencia y las compuertas de Alicachín.

#### **VI.8.2.4. CONCLUSIONES RESULTANTES DEL ANÁLISIS**

A Continuación se presentan las conclusiones generales de los análisis efectuados en este estudio:

Expediente No. 25000-23-27-000-2001-0479-01  
Acumulados Nos. 2000-0428, 2001-0122, 2001-0343  
Actor: GUSTAVO MOYA ÁNGEL Y OTROS  
Acción Popular

- De acuerdo con la comparación de secciones transversales de 1985 y de 1999, localizadas en distintos sectores del Río, puede concluirse que, en términos generales, el cauce ha permanecido estable.
- El efecto de las compuertas se extiende hasta unos 15 km aguas arriba de ellas, es decir que esta condición de frontera no afecta el comportamiento del Río en los sectores ubicados aguas arriba del Tunjuelo.
- El grado de protección de los jarillones actuales corresponde a una creciente con periodo de retorno comprendido entre 5 y 10 años.
- Si se considera únicamente el realce de los jarillones existentes, se requeriría de alturas comprendidas entre 5 m y 6 m.
- El efecto de amortiguación de la laguna de la Magdalena en el río Fucha produce una disminución en los niveles que varía entre 0.3 m y 0.5 m a lo largo del Río.
- La relocalización del jarillón izquierdo a 30 m de la orilla produce una reducción de los niveles que varía entre 0.35 m y 0.65 m a lo largo del Río. El efecto conjunto de la amortiguación de la laguna de la Magdalena y de la relocalización del jarillón a 30 m de la orilla izquierda reduce los niveles del Río que consiste en reducir dichos niveles entre 0.6 m y 1.0 m.

En resumen, las compuertas de Alicachín, controlan el nivel del Río en toda la cuenca media y el funcionamiento de caudales bajos no presenta condiciones muy diferentes

Expediente No. 25000-23-27-000-2001-0479-01  
Acumulados Nos. 2000-0428, 2001-0122, 2001-0343  
Actor: GUSTAVO MOYA ÁNGEL Y OTROS  
Acción Popular

a la de caudales medios, funcionando el Río en todos los casos como un cuerpo de aguas embalsado. Lo anterior lleva a concluir que, en época crítica de verano, los caudales disponibles en el Río, considerando los aportes de la PTAR Salitre, son suficientes para proveer agua para el distrito de Riego La Ramada y un caudal sostenible en el Río entre 3 y 4 m<sup>3</sup>/s, que tiene un comportamiento hidráulico similar al presentado con caudales medios.

#### VI.8.2.5. SISTEMA DE SANEAMIENTO

Dentro del sistema de saneamiento, el tratamiento primario químicamente asistido es el adecuado y, por lo tanto, se ha reformulado la alternativa del POT, de tres plantas hacia esta posibilidad y se ha comparado con la alternativa de dos plantas, la cual a su vez, considera dos sub-alternativas, una con la segunda planta en Tunjuelito y otra, con la segunda planta en Canoas.

El análisis económico indica que la alternativa más atractiva es la de dos plantas con PTAR en Salitre y Canoas, mientras que la menos favorable es la de tres plantas. Por ello, debe adoptar este esquema para continuar con el saneamiento del río Bogotá. Esta alternativa presenta los menores costos en igualdad de beneficios y, a su vez, en igualdad de costos, produce beneficios más rápidamente, siendo así que se logra el saneamiento de la cuenca media entre 6 y 9 años más temprano que con las otras alternativas.

Expediente No. 25000-23-27-000-2001-0479-01  
Acumulados Nos. 2000-0428, 2001-0122, 2001-0343  
Actor: GUSTAVO MOYA ÁNGEL Y OTROS  
Acción Popular

Por otra parte, la intercepción de las aguas de las cuencas de Fucha, Tunjuelo y Soacha tiene un efecto de remoción de carga contaminante sobre el Río en su cuenca media, muy superior al tratamiento en las plantas. Lo anterior, permite realizar inversiones futuras para mejorar el afluente de la PTAR Salitre y no sobre el de toda la ciudad, pudiendo llegar, así, a niveles de calidad superiores en toda la cuenca media.

Si se hace uso de una capacidad natural de depuración, bien sea en el río Bogotá o en el Embalse del Muña, mediante la cual se remueva carga contaminante de la cuenca media, estos servicios deberán ser compensados económicamente de manera adecuada.

Expediente No. 25000-23-27-000-2001-0479-01  
Acumulados Nos. 2000-0428, 2001-0122, 2001-0343  
Actor: GUSTAVO MOYA ÁNGEL Y OTROS  
Acción Popular

## VII.

### LA SENTENCIA APELADA

Mediante sentencia proferida el 24 de agosto de 2004 el Tribunal Administrativo de Cundinamarca Sección Cuarta Subsección B, desestimó las excepciones de mérito propuestas por los demandados y declaró solidariamente responsables de la catástrofe ecológica del río Bogotá y de la contaminación de los ríos y quebradas afluentes del primero y de que dan cuenta las pretensiones, por acción a todos los habitantes e industrias de la cuenca que desde hace no menos de veinte años han venido realizando sus vertimientos domésticos e industriales sin tratar como actores difusos, por omisión en el control de los vertimientos de las aguas residuales a la Nación- Ministerio de Minas y Energía- Ministerio de Ambiente Vivienda y Desarrollo Territorial (Instituto de Hidrología Y Meteorología, Ideam), al Ministerio de la Protección Social - (Invima), al Ministerio de Agricultura, a La Corporación Autónoma Regional de Cundinamarca, Car, al Distrito Capital de Bogotá-Dama- Empresa de Acueducto y Alcantarillado de Bogotá- Empresa de Energía Eléctrica, al Departamento de Cundinamarca y a los municipios de la Cuenca Alta: Villapinzón, Chocontá, Suesca, Sesquilé, Gachancipá, Tocancipá, Zipaquirá, Sopó, Cajicá, Chía, Cota, De la Cuenca Media: Funza, Mosquera, Soacha y Madrid, y de la Cuenca Baja: Al Municipio de Sibaté.

Por consiguiente, **AMPARÓ** los derechos colectivos a un **AMBIENTE SANO**, a la **SALUBRIDAD PÚBLICA** y a la **EFICIENTE**

Expediente No. 25000-23-27-000-2001-0479-01  
Acumulados Nos. 2000-0428, 2001-0122, 2001-0343  
Actor: GUSTAVO MOYA ÁNGEL Y OTROS  
Acción Popular

**PRESTACIÓN DE LOS SERVICIOS PÚBLICOS DOMICILIARIOS** dentro de los procesos acumulados por Acción Popular incoados por los señores **GUSTAVO MOYA ÁNGEL** (fallecido), **MIGUEL ÁNGEL CHAVES GARCÍA**, **JORGE HUMBERTO GONZÁLEZ VILLANUEVA Y NICOLÁS ROA**, y **JORGE ENRIQUE CUERVO RAMÍREZ**. Por consiguiente, salvaguardó los aludidos derechos colectivos mediante la **APROBACIÓN DE LOS ACUERDOS** presentados por los entes públicos mencionados en el literal anterior en la forma y términos discutidos y aprobados en las respectivas audiencias por las partes del proceso y con las observaciones y modificaciones de que da cuenta la parte motiva del fallo y con las órdenes y condenas respectivas.

El Tribunal aprobó los **ACUERDOS** presentados por las **INDUSTRIAS ETERNIT COLOMBIANA S.A.**, **LÍQUIDO CARBÓNICO COLOMBIANA S.A.**, **S.A.**, **ALPINA**, **GRUPO SIDERÚRGICO DIACO**, **STANTON & CIA S.A.**, **ESPUMADOS S.A.**, **PAPELES Y CORRUGADOS ANDINA S.A.**, **EMPRESA COLOMBIANA DE CABLES EMCOCABLES S.A.**, con la ejecución de las obras y en los términos en ellos propuestos. Respecto de **CRISTALERÍA PELDAR**, **REFISAL Y MALTERÍAS DE COLOMBIA S.A.**, igualmente declaró que si bien no existen unas propuestas concretas son empresas que deberán continuar con sus procesos de producción hacia la certificación de la Norma ISO 14001. Con la misma observación y en atención al tratamiento de sus aguas residuales declaró que la **COMPAÑÍA NACIONAL DE VIDRIOS S.A.**, no vierte sus aguas residuales hacia el río Bogotá sin tratar. En cuanto a las sociedades **PROTEÍNAS Y ENERGÉTICOS DE COLOMBIA S.A.**, **DISTRIBUIDORA TROPIABASTOS LTDA.** Y **UNIABASTOS EN LIQUIDACIÓN** encontró probada la actuación que sobre sus procesos de producción reposa en

Expediente No. 25000-23-27-000-2001-0479-01  
Acumulados Nos. 2000-0428, 2001-0122, 2001-0343  
Actor: GUSTAVO MOYA ÁNGEL Y OTROS  
Acción Popular

la CAR, la que deberá continuar con el control ambiental a estas industrias bajo las metas señaladas.

Asimismo, declaró como no probada la excepción de **COSA JUZGADA** que interpusieron la **CAR, EMGESA y la EMPRESA DE ACUEDUCTO Y ALCANTARILLADO DE BOGOTA y NEGÓ LA DENUNCIA DEL PLEITO Y LOS LLAMAMIENTOS** en garantía planteados por la **EMPRESA DE ENERGÍA DE BOGOTÁ y la EMPRESA GENERADORA DE ENERGÍA "EMGESA"** respectivamente. Respecto de la **OBJECCIÓN POR ERROR GRAVE** al dictamen pericial presentado por los auxiliares **FABIO ROBERTO PÉREZ y JOSÉ MANUEL GONZÁLEZ**, como en relación con el señalamiento de sus honorarios, dispuso estarse a lo dispuesto en el punto 6.17, según las motivaciones del fallo.

Igualmente absolvió de las pretensiones a la **COMISIÓN REGULADORA DE AGUA POTABLE, -CRA-, al INSTITUTO GEOGRÁFICO AGUSTÍN CODAZZI, a la SUPERINTENDENCIA DE SERVICIOS PÚBLICOS DOMICILIARIOS**, así mismo a la **SOCIEDAD BOGOTANA DE AGUAS SUEZ LYONNAISE DES EAUX DEGREMONT E.S.P. S.A.** respecto de la cual el cumplimiento del contrato 015 corresponderá al Juez Contencioso Administrativo a cuya competencia está adscrita el examen de legalidad, como también la tiene para el contrato de concesión que para el efecto se celebró y se compulsarán copias de las piezas procesales pertinentes con destino a la Contraloría General de la República y a la Fiscalía General de la Nación para que investiguen el detrimento que al fisco se ha causado, como las conductas ilícitas en que se haya podido incurrir.

Expediente No. 25000-23-27-000-2001-0479-01  
Acumulados Nos. 2000-0428, 2001-0122, 2001-0343  
Actor: GUSTAVO MOYA ÁNGEL Y OTROS  
Acción Popular

En principio el Tribunal accedió a la acumulación de las diferentes acciones populares, estableció los derechos colectivos que a consecuencia de la acción u omisión de los particulares y de las autoridades vienen siendo vulnerados; analizó cuál es el estado de contaminación del RÍO BOGOTA, de sus afluentes y del impacto ambiental que por el trasvase de sus aguas venía realizando la EEB, hoy por EMGESA al EMBALSE DEL MUÑA, después analizó el porqué de la responsabilidad de las autoridades y la que tienen los particulares por los vertimientos puntuales residuales en sus casas de habitación o en sus industrias, luego indica las diferentes propuestas para integrar el Pacto de Cumplimiento, que fueron analizados y aprobados por todos los intervinientes, algunos de ellos registraron su inconformidad con respecto a la escogencia de las alternativas de solución a seguir por sobre todo las presentadas por la EEB, EMGESA, la EAAB y la CAR, principales actores en la consecución del objetivo de la descontaminación de los recursos hídricos y aminoración de su impacto ambiental, en procura de dejar claro el problema de infraestructura concerniente a la Solución Técnica Integral para la Descontaminación del río Bogotá, determinada y aprobada por los técnicos en la materia que representaron a cada una de las entidades involucradas en la mesa de trabajo que para el efecto se llevó a cabo una vez se presentaron y discutieron las diferentes propuestas de Pacto de Cumplimiento, luego de la cual se procedió a impartir su aprobación por quienes como partes concurrieron al proceso, de todo lo cual se dejó constancia en las respectivas actas.

**Expediente No. 25000-23-27-000-2001-0479-01**  
**Acumulados Nos. 2000-0428, 2001-0122, 2001-0343**  
**Actor: GUSTAVO MOYA ÁNGEL Y OTROS**  
**Acción Popular**

Establecido cuál es el grado de participación de cada uno de los entes involucrados que ha de tener para el logro del objetivo trazado, mediante la ejecución de obras de infraestructura, como de las acciones encaminadas a las prácticas de producción más limpia, dejó claro cuáles son las obligaciones a cumplir como producto de sus propuestas, se adentra la Sala a examinar sobre la necesidad de proferir otras órdenes y condenas, (como así se acordó con las partes que permita cumplir la meta, esto es la descontaminación del RÍO BOGOTÁ y de sus AFLUENTES), procurando que las cargas se distribuyan entre los diferentes entes públicos en consideración al grado de responsabilidad que cada uno tiene en la causación del grave problema ambiental difuso, ocasionado no sólo por la acción dolosa o culposa de quienes han venido en forma directa ejercitando las prácticas que atentan contra el medio ambiente, sino por - cuestión también preponderante- el actuar omisivo y negligente de las autoridades ambientales y por todos aquellos entes públicos a los que la Constitución y la Ley les ha venido asignando funciones que los obligaban a impedir su propagación, destacándose aquí la falta de un organigrama administrativo, falencias que de no haber existido les hubiese permitido atender todos los frentes que implica su gestión ambiental.

## **VIII**

### **LOS RECURSOS DE APELACIÓN**

A lo resuelto por la Magistrada en la sentencia del 25 de agosto de 2001 y su complementaria la del 16 de

Expediente No. 25000-23-27-000-2001-0479-01  
Acumulados Nos. 2000-0428, 2001-0122, 2001-0343  
Actor: GUSTAVO MOYA ÁNGEL Y OTROS  
Acción Popular

septiembre del mismo año, se presentaron las siguientes impugnaciones:

### **VII.1. APELACIÓN DEL MINISTERIO DE EDUCACIÓN NACIONAL}**

En escrito fechado el 24 de septiembre de 2004 (fls. 5866 a 5873 y 6439), la apoderada del Ministerio de Educación recurrió la sentencia de instancia y su complementaria, al efecto manifestó que mediante Decreto 1743 de 1994 instituyó el Proyecto de Educación Ambiental para todos los niveles de educación formal, fijó los criterios para la promoción de la educación no formal e informal y estableció los mecanismos de coordinación con el Ministerio de Medio Ambiente.

Adujo que ha venido trabajando desde años anteriores en la educación ambiental con participación directa de las regiones e instituciones en los sectores ambiental y educativo como función del Estado y, en el año de 1992, publicó el documento "*Lineamientos generales para una política nacional de educación ambiental*".

Expuso que en el año de 1996 publicó el documento denominado "*La Dimensión Ambiental: Un reto para la Educación de la Nueva Sociedad*", mediante el cual se crearon los PRAE como una de las diversas alternativas para la inclusión de la dimensión ambiental en la educación básica general.

Aseveró que los Proyectos Ambientales Escolares fueron establecidos como una estrategia fundamental para incluir

Expediente No. 25000-23-27-000-2001-0479-01  
Acumulados Nos. 2000-0428, 2001-0122, 2001-0343  
Actor: GUSTAVO MOYA ÁNGEL Y OTROS  
Acción Popular

la dimensión ambiental en los currículos escolares de los Proyectos Educativos institucionales - PEI en las diferentes regiones del país.

En cuanto al currículo, alegó que la Ley 115 de 1994, en el capítulo 2º, artículos 76 a 79, establece el plan de estudios y sus proyectos respectivos y determina las competencias de las Secretarías de Educación Departamentales y Distritales en la asesoría para el diseño y desarrollo de los mismos.

Agregó que el Ministerio ya incluyó en todos los niveles de educación básica como área obligatoria y fundamental la establecida en el numeral 1º del artículo 23 de la Ley 115.

Concluyó que no es procedente la inclusión de los PRAES en ninguno de los niveles de educación primaria, media, tecnológico y superior como cátedra obligatoria, toda vez que la Ley General de Educación ordena que lo ambiental debe desarrollarse como un proyecto transversal.

De otro lado, se refirió a la orden establecida en el literal q). Sobre el particular consideró que no es el Ministerio de Educación Nacional el competente para fijar el currículo, pensum o plan de estudios, toda vez que las instituciones de educación formal son las que tienen dicha competencia, por cuanto así lo dispone el artículo 77 de la Ley 115 de 1994.

En lo atinente al Proyecto Educativo Institucional (PEI) mencionó que es obligación de cada establecimiento

Expediente No. 25000-23-27-000-2001-0479-01  
Acumulados Nos. 2000-0428, 2001-0122, 2001-0343  
Actor: GUSTAVO MOYA ÁNGEL Y OTROS  
Acción Popular

educativo elaborar y poner en práctica este proyecto en el que se especifiquen entre otros aspectos, los principios y fines del establecimiento, los recursos docentes y didácticos disponibles y necesarios, la estrategia pedagógica, el reglamento para docentes y estudiantes y el sistema de gestión.

Por lo anterior, solicitó que se revoquen las órdenes impartidas al Ministerio de Educación Nacional en los literales k) y q) del numeral 3° de la sentencia de instancia.

En lo que tiene que ver con la providencia complementaria, señaló que si bien es cierto se encuentra demandada también lo es que no puede resultar condenada en costas toda vez que suscribió pacto de cumplimiento para colaborar con la descontaminación del río Bogotá.

Argumentó que no es un ente contaminador y mucho menos ha incurrido en conductas omisivas, por el contrario comentó que ha desarrollado la política educativa ambiental de acuerdo a sus facultades constitucionales.

## **VII.2. APELACIÓN DEL MINISTERIO DE AGRICULTURA Y DESARROLLO RURAL**

A través de escrito visible a folios 6611 a 6617 del expediente, el apoderado judicial del Ministerio solicitó que se revoque o modifique el numeral 1° de la parte resolutive de la sentencia del 25 de agosto de 2004, en lo atinente a la responsabilidad por omisión en el control de vertimientos de aguas residuales.

Expediente No. 25000-23-27-000-2001-0479-01  
Acumulados Nos. 2000-0428, 2001-0122, 2001-0343  
Actor: GUSTAVO MOYA ÁNGEL Y OTROS  
Acción Popular

Señaló que se debe modificar el numeral 3º, literal f), en cuanto le ordenó ejercer control en la zona de ronda del río Bogotá y sancionar a los propietarios de los predios que no cerquen sus linderos para impedir el paso del ganado hacía las fuentes hídricas, por cuanto no es función de la entidad.

Argumentó que las acciones populares no fueron concebidas para desbordar el ámbito constitucional y legal de forma que puedan desconocer principios, procedimientos y reglas rectoras que garantizan una seguridad jurídica y una debida defensa en el marco del Estado Social de Derecho.

En relación con lo establecido en el literal q) del numeral 3º, dijo que no cabe duda que como funciones asignadas por el artículo 5º de la Ley 99 de 1993 a cada uno de los Ministerios, resulta claro que las mismas deben cumplirse en coordinación con la política del Ministerio de Ambiente, Vivienda y Desarrollo Territorial, en el sub lite no existe un cargo concreto sobre la inobservancia de las mismas para que se pueda predicar un incumplimiento.

Recalcó que en el punto 6.5.2. no se consigna obligación a cargo del Ministerio de Agricultura. Respecto del cargo atinente a la falta de una política coordinada sobre los asentamientos humanos en el Distrito Capital, originada entre otros factores por la violencia de los grupos armados, enfatizó que este argumento escapa de los hechos que soportan las diferentes demandas populares que son objeto de estudio.

Expediente No. 25000-23-27-000-2001-0479-01  
Acumulados Nos. 2000-0428, 2001-0122, 2001-0343  
Actor: GUSTAVO MOYA ÁNGEL Y OTROS  
Acción Popular

No obstante lo anterior, agregó que el Ministerio cuenta con una política agropecuaria y de desarrollo rural "*Manejo Social del Campo*" cuyo propósito es promover e incentivar las actividades productivas dentro de la frontera agrícola mediante la creación de un sector competitivo, equitativo y sostenible.

Precisó que el pacto de cumplimiento del Ministerio de Agricultura no debe entenderse como el reconocimiento de una omisión en el ejercicio de sus funciones, sino como un soporte para el Ministerio de Ambiente, Vivienda y Desarrollo Territorial, así como para la CAR en el desarrollo de las funciones que les atañe y que tienen que ver con la recuperación ecológica y ambiental del río Bogotá.

Finalmente, solicitó la revocatoria del numeral 1º de la sentencia complementaria fechada el 16 de septiembre de 2004, en el sentido de excluirlo de cualquier condena que se profiera.

### **VII.3. APELACIÓN DEL MINISTERIO DE AMBIENTE, VIVIENDA Y DESARROLLO TERRITORIAL**

El apoderado judicial sustentó el recurso de apelación de la siguiente manera:

Consideró que se debe revocar el numeral 1º de la decisión de instancia en razón a que el Ministerio carece de competencias para ejercer el control de vertimientos de las aguas residuales en los ríos y quebradas del país, toda vez que su función es expedir las regulaciones

Expediente No. 25000-23-27-000-2001-0479-01  
Acumulados Nos. 2000-0428, 2001-0122, 2001-0343  
Actor: GUSTAVO MOYA ÁNGEL Y OTROS  
Acción Popular

correspondientes, pero el cumplimiento de las mismas son ejercidas directamente por otras autoridades ambientales, como son las Corporaciones Autónomas Regionales y los grandes centros urbanos.

Resaltó que mal podría condenarse al Ministerio por no controlar los vertimientos en los cuerpos de agua, cuando no tiene competencia asignada por la ley.

Se refirió a la orden contenida en el artículo 3º, literal b) de la sentencia, en cuanto decidió que en el término máximo de tres (3) meses el Ministerio debía proceder a la delimitación geográfica de las zonas excluidas de la minería. Al respecto, comentó que la resolución desconoce que en cumplimiento del mandato establecido en el artículo 61 de la Ley 99 de 1993, expidió las Resoluciones 0222 de 1994, por medio de la cual se establecen las zonas de exclusión de la actividad minera en la Sabana de Bogotá, la cual fue modificada por las Resoluciones 249 de 1994, 1277 de 1996 y 0803 de 1999; igualmente expidió la Resolución No. 813 de 2004, por medio de la cual se redefinen y establecen las zonas compatibles con la minería de arcilla en la Sabana de Bogotá y se sustituyen las Resoluciones 022 de 1994, 249 de 1994, 1277 de 1996 y 0803 de 1999.

Expresó su inconformidad con el artículo 3º, literal c, teniendo en cuenta que lo relacionado con los títulos, permisos, concesiones y licencias de exploraciones mineras no es competencia de la entidad, sino del Ministerio de Minas y Energía, mencionó que sólo le

Expediente No. 25000-23-27-000-2001-0479-01  
Acumulados Nos. 2000-0428, 2001-0122, 2001-0343  
Actor: GUSTAVO MOYA ÁNGEL Y OTROS  
Acción Popular

corresponde lo relacionado con las licencias ambientales pero para la gran minería.

De otro lado, propuso la modificación del numeral 10° relativo al reconocimiento económico de que trata el artículo 39 de la Ley 472 de 1998, en razón a que son cinco (5) los accionantes y lo considerable sería fijar un incentivo de 150 S.M.L.M.V. repartidos entre los actores y a su vez a prorrata de todas las entidades públicas y privadas condenadas en el fallo de primera instancia. Disiente que a las entidades privadas no se les impuso la obligación de pagar incentivos, viendo claramente la inequidad en el reparto del mismo.

Arguyó que no está de acuerdo con la orden de cofinanciar el dragado del río Bogotá y sus afluentes, por cuanto se estarían violando las funciones y competencias del Ministerio.

En relación con la aprobación por parte del Tribunal de los escritos contentivos de los pactos de cumplimiento, encontró que los mismos no cumplieron con los requisitos establecidos en la Ley 472 de 1998, artículo 29, en razón a que no todos los actores asistieron a las diferentes sesiones en donde se presentaron los pactos, ni hubo un acta en el cual todos los actores y demandados firmaran la aceptación de los pactos propuestos y mucho menos hubo aprobación mediante sentencia, sino que se abrió a pruebas el proceso, se corrió traslado para alegar y ahora en el fallo, se dice aprobar los pactos propuestos por las partes.

Expediente No. 25000-23-27-000-2001-0479-01  
Acumulados Nos. 2000-0428, 2001-0122, 2001-0343  
Actor: GUSTAVO MOYA ÁNGEL Y OTROS  
Acción Popular

Finalmente, solicitó la revisión de la acumulación de las acciones, lo anterior por cuanto la radicada con el No. 0479 pretende la construcción de una Planta de Tratamiento en el Embalse del Muña, la identificada con el No. 0343 busca la descontaminación del río Bogotá en la Cuenca Alta y las demás persiguen la descontaminación de los afluentes del río Bogotá.

También indicó que se debe analizar que todas las demandas tienen diferentes demandados y a pesar de ello se procedió a acumularlas contrariando el artículo 157 del C.P.C. Resaltó que no todas las partes demandadas fueron notificadas, situación que fue puesta en conocimiento para evitar una nulidad procesal, tal como ocurrió con el Ministerio de Ambiente y Vivienda.

#### **VII.4. APELACIÓN DEL MINISTERIO DE COMERCIO, INDUSTRIA Y TURISMO**

A través de apoderado judicial debidamente reconocido, la entidad presentó y sustentó recurso de apelación contra la sentencia de instancia con los siguientes argumentos:

En primer lugar señaló que mediante la Ley 790 de 2002 se fusionó el Ministerio de Desarrollo Económico y el Ministerio de Comercio Exterior, conformando el Ministerio de Comercio, Industria y Turismo; de igual forma, dijo que la formulación de políticas relativas al uso del suelo y ordenamiento urbano, agua potable y saneamiento básico, desarrollo territorial y urbano, así

**Expediente No. 25000-23-27-000-2001-0479-01**  
**Acumulados Nos. 2000-0428, 2001-0122, 2001-0343**  
**Actor: GUSTAVO MOYA ÁNGEL Y OTROS**  
**Acción Popular**

como la política habitacional integral, fueron asignadas al Ministerio de Ambiente y Desarrollo Territorial.

Aclaró que mediante el Decreto - Ley 210 de febrero 3 de 2003, se establecieron los objetivos y la estructura orgánica de la entidad, determinando que todas las referencias que hagan las disposiciones legales al Ministerio de Desarrollo Económico y al Ministerio de Comercio Exterior se entenderán realizadas por el Ministerio de Comercio, Industria y Turismo.

En cuanto a la sustancia del recurso, puso de presente la falta de legitimación en la causa por pasiva, lo anterior al responsabilizarlo por acción u omisión en la contaminación del río Bogotá, ya que el Ministerio no ha sido el causante de esta situación por lo siguiente:

- No realiza ninguna actividad que sea fuente contaminante en el río Bogotá.
- No tiene competencias legales en lo ambiental para controlar o vigilar a quien efectúa la contaminación.
- No se le han asignado atribuciones legales para expedir licencias ambientales o sanitarias.
- No efectúa bombeos de agua al río Bogotá.
- No arroja aguas residuales domésticas e industriales al río Bogotá.
- No le corresponde legalmente efectuar ningún tipo de tratamiento a las aguas servidas ya que no es una empresa de servicios públicos de alcantarillado.

Expediente No. 25000-23-27-000-2001-0479-01  
Acumulados Nos. 2000-0428, 2001-0122, 2001-0343  
Actor: GUSTAVO MOYA ÁNGEL Y OTROS  
Acción Popular

- El Decreto - Ley 210 de 2003 lo habilita para expedir las políticas en materias relacionadas con el comercio interno y externo, competitividad turismo e industria, quedando claro que no existe nexo de causalidad real, cierto y concreto entre las determinaciones de la sentencia de primera instancia y la conducta que ha desempeñado en ejercicio de sus funciones.
- Al ministerio no le corresponde cofinanciar las obras de infraestructura.

Agregó que en la sentencia impugnada no se determina con precisión y claridad si al Ministerio de Comercio, Industria y Turismo, como consecuencia de una "*supuesta*" acción u omisión, que en su entender no existe, se le ordena desplegar sus buenos oficios o cofinanciar, de una lado, tanto todas las obras de infraestructura que requieran los procesos de producción más limpia, y de otro, la implementación, coordinación y puesta en funcionamiento del Parque de Coeficiente Industrial de las Curtiembres de San Benito. Resaltó que no le corresponde prestar los buenos oficios para la cofinanciación de obras de infraestructura.

Así mismo recalcó que en las mesas de trabajo y en el pacto de cumplimiento, la entidad no intervino, tampoco presentó, ni registró proyecto ni compareció a las audiencias, por lo que los pactos no lo vinculan bajo ningún aspecto en razón a la reiterada ausencia de legitimación en la causa por pasiva dentro del plenario.

Expediente No. 25000-23-27-000-2001-0479-01  
Acumulados Nos. 2000-0428, 2001-0122, 2001-0343  
Actor: GUSTAVO MOYA ÁNGEL Y OTROS  
Acción Popular

Anotó que en la providencia apelada no se cuestiona el ejercicio de las atribuciones conferidas legalmente al Ministerio de Comercio, Industria y Turismo y que en esa medida no hay lugar a las advertencias o condenas allí plasmadas.

Manifestó que en la sentencia se creó un comité para la verificación del cumplimiento de las obligaciones contraídas en los diferentes acuerdos; posteriormente se creó un subcomité de vigilancia y finalmente a la ejecutoria de la sentencia se conformaron seis comités, los cuales se encuentran impedidos para su verificación, toda vez que el Consejo de Estado asumió la competencia para resolver los recursos de apelación y, por ende, hasta tanto se decida el cumplimiento de lo resuelto por el superior, es válida la inasistencia del Ministerio a todos ellos.

Por lo expuesto, la entidad solicitó que sea revocada la sentencia proferida por la Sección Cuarta del Tribunal Administrativo de Cundinamarca, en lo que respecta al Ministerio de Comercio, Industria y Turismo.

#### **VII.5. APELACIÓN DEL MINISTERIO DE HACIENDA Y CRÉDITO PÚBLICO**

En escrito visible a folios 6273 a 6276 del expediente, el apoderado del Ministerio de Hacienda y Crédito Público presentó recurso de apelación frente a la sentencia de instancia; al efecto adujo que si bien es cierto la entidad no resultó condenada también lo es que resulta de

Expediente No. 25000-23-27-000-2001-0479-01  
Acumulados Nos. 2000-0428, 2001-0122, 2001-0343  
Actor: GUSTAVO MOYA ÁNGEL Y OTROS  
Acción Popular

suma importancia su pronunciamiento sobre ciertos aspectos relacionados con la conminación efectuada.

Aseguró que la sentencia se refiere a las transferencias correspondientes al sistema general de participaciones para que el Ministerio en forma oportuna y sin dilaciones transfiera los recursos, lo cual, según manifestó, lo ha realizado en los términos de ley. Así mismo, aseguró que girará los demás que correspondan.

En lo atinente a las transferencias por concepto de regalías a los municipios y al Distrito Capital, las cuales deben ser destinadas al saneamiento del río Bogotá, precisó que deben ser modificadas para que puedan ser aplicadas de acuerdo a los principios de coherencia macroeconómica y legalidad del gasto. No obstante, alegó que tal actuación se convertiría en una obligación jurídicamente imposible al contemplar gastos adicionales a los que prevé el Presupuesto General de la Nación.

Concluyó que las erogaciones que ordena efectuar la sentencia impugnada, exceden las previsiones legales vigentes, por lo que su inclusión en los términos de la providencia iría en contra del principio de coherencia macroeconómico y legalidad del gasto, generando una serie de consecuencias adversas para toda la economía nacional.

Expediente No. 25000-23-27-000-2001-0479-01  
Acumulados Nos. 2000-0428, 2001-0122, 2001-0343  
Actor: GUSTAVO MOYA ÁNGEL Y OTROS  
Acción Popular

#### **VII.6. APELACIÓN DEL MINISTERIO DE MINAS Y ENERGIA**

El apoderado especial de la entidad presentó recurso de apelación argumentando que las órdenes que le impuso el Tribunal están por fuera de su ámbito de acción legal.

En relación con el numeral 1º (omisión en el control de vertimiento), recordó que el Ministerio es una entidad pública de carácter nacional del nivel superior, cuya responsabilidad es la de administrar los recursos naturales no renovables del país asegurando su mejor y mayor utilización, la orientación en el uso y regulación de los mismos, garantizando su abastecimiento y velando por la protección de los recursos naturales del medio ambiente con el fin de garantizar su conservación, restauración y desarrollo sostenible.

Afirmó que desde su creación el Ministerio ha tenido funciones de autoridad minera, la cual hasta la expedición de la Constitución Política de 1991 y la Ley 99 de 1993, tuvo a su cargo el desarrollo de la actividad minera con la observancia y control de los asuntos ambientales hasta el 6 de agosto de 1994, cuando se expidió el Decreto 1753 mediante el cual se definió la competencia ambiental y pasaron a ser competencia de las autoridades ambientales como el Ministerio de Medio Ambiente, hoy Ministerio de Medio Ambiente, Vivienda y Desarrollo Territorial y las Corporaciones Autónomas Regionales.

Expediente No. 25000-23-27-000-2001-0479-01  
Acumulados Nos. 2000-0428, 2001-0122, 2001-0343  
Actor: GUSTAVO MOYA ÁNGEL Y OTROS  
Acción Popular

Anotó que en materia minera el Ministerio de Minas se rige por las disposiciones establecidas en el Código de Minas y demás normas que lo reglamentan, modifican o adicionan.

Mencionó que no se encuentra probado cómo el Ministerio de Minas y Energía ha violado alguno de los derechos colectivos invocados en la demanda, cuando sin perjuicio de aceptar que frente al mismo tema varias entidades puedan tener funciones, cada una de ellas diferenciales, de las cuales de ninguna manera se pueda considerar que entre las de ellas se encuentra la de *"establecer planes y programas ambientales que propendan por la mitigación de posibles impactos ambientales en el desarrollo de una actividad productiva"*.

Consideró que el Ministerio ha cumplido de conformidad con lo que ordena y asigna la Constitución y la ley, y no puede la entidad ni sus empleados extralimitarse en sus funciones.

Mencionó que la competencia del Ministerio se fundamenta en el desarrollo de un programa de fiscalización minera, que consiste en realizar las visitas periódicas de campo a los títulos mineros, con el fin de constatar que las actividades se efectúen de manera correcta desde el punto de vista técnico y cumplan con las obligaciones mineras establecidas en el contrato de concesión.

Concluyó que mal puede el Tribunal de instancia condenar al Ministerio por omisión en el control de vertimientos de aguas residuales en la actividad minera, cuando dicha

Expediente No. 25000-23-27-000-2001-0479-01  
Acumulados Nos. 2000-0428, 2001-0122, 2001-0343  
Actor: GUSTAVO MOYA ÁNGEL Y OTROS  
Acción Popular

función se encuentra legalmente atribuida a las autoridades ambientales.

De otra parte y en cuanto a los ordinales b) y d) del numeral 3° de la sentencia, señaló que si bien es cierto dentro de las funciones establecidas en los artículos 5°, 31 y 61 de la Ley 99 de 1993, se encuentra la de delimitar las zonas excluidas de la minería, erradamente el a quo considera que esa normativa no ha sido expedida, cuando existen las Resoluciones No. 222 de 1999 derogada por la 813 de 2004.

Agregó que lo anterior en ningún momento quiere significar que con dichas medidas se tengan que acabar y cerrar las explotaciones mineras concedidas mediante actos o contratos con anterioridad a las mismas, sino que por el contrario, se debe propender porque las actividades mineras en dicha zona se realicen cumpliendo los planes de manejo ambiental y propendiendo por un desarrollo sostenible.

En lo que corresponde a la competencia y responsabilidad del Ministerio de Minas y Energía, comunicó que otorgó los títulos mineros en cumplimiento de las disposiciones legales vigentes, y que ha efectuado la fiscalización y seguimiento de las actividades desarrolladas.

Aclaró que al expedir la autoridad minera los mencionados títulos en la zona del Municipio de la Calera, dicha zona no estaba excluida para esa actividad y los titulares del mismo han venido cumpliendo con lo dispuesto por la CAR respecto de la recuperación y restauración.

Expediente No. 25000-23-27-000-2001-0479-01  
Acumulados Nos. 2000-0428, 2001-0122, 2001-0343  
Actor: GUSTAVO MOYA ÁNGEL Y OTROS  
Acción Popular

Mencionó que cuando ordena la sentencia que el Ministerio de Ambiente, Vivienda y Desarrollo Territorial con la intervención del Ministerio de Minas, proceda a revocar y suspender los títulos mineros, permisos, concesiones y licencias de exploración mineras en las zonas de exclusión, no se tuvo en cuenta que la referida entidad no es competente para revocar o suspender títulos mineros y mucho menos para declarar la cancelación o caducidad de los mismos.

En el caso de la competencia del Ministerio de Minas, agregó que no puede tomar parte en las decisiones que se exigen toda vez que debe ceñirse al cumplimiento de la normativa aplicable para poder revocar o suspender los títulos a los que se refiere la sentencia, así como no puede declarar la cancelación o caducidad de los mismos.

Resaltó que diferente es que la autoridad ambiental dentro de su ámbito de competencia proceda a cancelar la autorización o licencia ambiental concedida a favor de cada titular que corresponde a la zona de exclusión si se dan los motivos de acuerdo con los estudios y análisis efectuados por dicha autoridad en ejercicio de sus funciones, toda vez que una de las causas de cancelación o caducidad es precisamente la revocación de las autorizaciones o licencias ambientales necesarias para las obras y trabajos mineros.

En cuanto al componente ambiental su manejo ha estado a cargo de la autoridad correspondiente que es la llamada a pronunciarse cuando estas explotaciones causen impactos.

Expediente No. 25000-23-27-000-2001-0479-01  
Acumulados Nos. 2000-0428, 2001-0122, 2001-0343  
Actor: GUSTAVO MOYA ÁNGEL Y OTROS  
Acción Popular

Expresó que no se puede dar cumplimiento a los ordinales e), ñ) y q) porque al destinar recursos para cumplir con dichas obligaciones el Ministerio extralimitaría sus funciones.

En lo atinente al numeral cuarto ordinal h) de la parte resolutive de la sentencia, solicitó que se revocara en cuanto el Ministerio no tiene dentro de sus funciones el control de vertimiento de aguas, y no puede asumir los costos por el dragado de lodos generados y depositados, debido a que es competencia de la autoridad ambiental a través del Plan de Manejo establecer las medidas de control, mitigación y recuperación de los sedimentos generados durante el proceso minero.

Añadió que se encuentra en desacuerdo con el numeral undécimo porque no se puede obligar al Ministerio a pagar incentivos a otros demandantes que dentro del proceso no solicitaron su vinculación y, además, los 50 salarios mínimos legales vigentes extralimitan el tope máximo que el artículo 39 de la Ley 472 de 1998 señala.

#### **VII.7. APELACIÓN DEL FONDO NACIONAL DE REGALÍAS**

A través de apoderado judicial y mediante escrito allegado al plenario el día 24 de febrero de 2005 (fls. 7086 a 7099), el apoderado del Fondo aseveró que debe revocarse el numeral 3 del literal v) de la sentencia y se guarde silencio o se manifieste la ausencia de cualquier responsabilidad por acción u omisión.

Expediente No. 25000-23-27-000-2001-0479-01  
Acumulados Nos. 2000-0428, 2001-0122, 2001-0343  
Actor: GUSTAVO MOYA ÁNGEL Y OTROS  
Acción Popular

Indicó que el Estado es titular de la contraprestación económica que a título de regalía y otro concepto se cause con ocasión de la explotación de los recursos naturales no renovables.

Enunció que las entidades territoriales al tenor de lo dispuesto en el inciso 3° del artículo 360 de la Constitución tienen derecho a dichos recursos.

Sin perjuicio de lo anterior, resaltó el carácter condicionado para acceder a los recursos del Fondo Nacional de Regalías (regalías indirectas).

Comentó que cualquier decisión que dentro de un proceso judicial se adopte sobre la disposición de regalías y en particular de aquellas administradas por el Fondo, comporta una real afectación, positiva o negativa, de parte de quienes se presentan como reales beneficiarios de regalías indirectas y, que por lo mismo impondría la participación de quien está llamado a salvaguardar los recursos del Fondo y de allí a representar los intereses de quienes tienen derecho a ellos.

Precisó que acreditado el interés y obligación del Departamento Nacional de Planeación de participar dentro de la acción popular adelantada, el juez del proceso inmediatamente tiene conocimiento de una eventual omisión en el giro de unos recursos del Fondo Nacional de Regalías, ha debido llamar a quien para la época llevaba la representación de los interesados en los mismos.

Expediente No. 25000-23-27-000-2001-0479-01  
Acumulados Nos. 2000-0428, 2001-0122, 2001-0343  
Actor: GUSTAVO MOYA ÁNGEL Y OTROS  
Acción Popular

Observó que la referida citación no se surtió dentro del proceso y por lo mismo se privó a quien estaba llamado a la defensa o a representar los intereses de los beneficiarios del Fondo Nacional de Regalías a controvertir las imputaciones u omisiones que hicieron algunos de los intervinientes dentro del proceso, constituyéndose así un desconocimiento del debido proceso y una violación del derecho de acceso a la administración de justifica en cabeza, uno y otro, de las entidades territoriales beneficiarios reales de dichos recursos.

Advirtió que las afirmaciones hechas por algunos de los municipios y el Distrito Capital respecto del presunto desacato por parte del Fondo de Regalías en las transferencias de los recursos, ha debido bastar para llamar a controvertir dicha afirmación

Como pretensión subsidiaria comentó la inexistencia de omisión del Fondo Nacional de Regalías. Explicó que si bien cada vez que se presentan los hechos generadores de la contraprestación a favor del Estado con motivo de la explotación del recurso natural no renovable, surge en cabeza de éste el derecho a solicitar del contratista las regalías, por lo que no necesariamente tales recursos deben incorporarse en su totalidad al presupuesto General de la Nación, posibilidad que tiene justificaciones de orden jurídico, económico y financiero.

Desde el punto de vista jurídico destacó los contenidos de los artículos 20 y 21 del Decreto 111 de 1996 o Estatuto Orgánico del Presupuesto, referidos respectivamente a los principios presupuestales de

**Expediente No. 25000-23-27-000-2001-0479-01**  
**Acumulados Nos. 2000-0428, 2001-0122, 2001-0343**  
**Actor: GUSTAVO MOYA ÁNGEL Y OTROS**  
**Acción Popular**

coherencia macroeconómica y homeóstasis, que a su vez son una expresión de los artículos 334 de la Constitución Política que ubica en cabeza del Estado la dirección general de la economía y del 374 que establece como objetivo de política económica del Estado, a través del Banco de la República, el mantenimiento de la capacidad adquisitiva de la moneda.

Dijo que uno y otro principio obligan tanto al Gobierno Nacional como al Congreso de la República abstenerse de incorporar en la respectiva ley anual de presupuesto la totalidad de los recursos de regalías del Fondo Nacional dentro de una determinada vigencia fiscal, o ya incorporado, reducir las apropiaciones.

En este sentido, sugirió que una mención de los entes territoriales dentro del proceso de la referencia a eventuales incumplimientos u omisiones del Fondo pudo haberse podido desvirtuar si se hubiera vinculado al proceso.

Ahora bien, comentó que la no apropiación de la totalidad de los recursos de regalías causados en las vigencias fiscales anuales ha sido objeto de debate en otras oportunidades y, siempre, la jurisprudencia se ha mostrado del todo convencida de que corresponde al ejecutivo determinar, en orden a asegurar la correspondencia del proceso presupuestal con los objetivos de política económica, el nivel de los recursos del Fondo Nacional de Regalías que se incorporarán durante una determinada vigencia fiscal.

Expediente No. 25000-23-27-000-2001-0479-01  
Acumulados Nos. 2000-0428, 2001-0122, 2001-0343  
Actor: GUSTAVO MOYA ÁNGEL Y OTROS  
Acción Popular

Sostuvo la suma diligencia del Fondo en la distribución del recurso al punto que en el parágrafo del artículo 1º de la Ley 141 de 1994 se dispuso que no menos del veintiún por ciento (21%) para financiar programas y proyectos para la descontaminación del río Bogotá.

Sin embargo anotó que falta camino por recorrer por cuanto resulta necesario resolver y verificar los requisitos que deben cumplir los proyectos que con destino a la recuperación del Río son susceptibles de ser financiados con cargo a recursos del Fondo.

En suma, dijo que por violación al debido proceso - derecho de contradicción y acceso a la administración de justicia - y subsidiariamente por la probada inexistencia de una omisión por parte del Fondo Nacional de Regalías debe desestimarse las pretensiones en lo que respecta a ella.

#### **VII.8. APELACIÓN DEL DEPARTAMENTO NACIONAL DE PLANEACIÓN**

Mediante escrito visible a folios 7100 a 7122 del expediente, la entidad de planeación sustentó el recurso de apelación interpuesto de la siguiente forma:

Manifestó que el juez no encontró responsable por acción ni por omisión de la contaminación del río Bogotá al Departamento Nacional de Planeación y que a pesar de lo anterior se impartió una orden con la finalidad de empezar a corregir o reparar el daño que objetivamente se ha probado.

Expediente No. 25000-23-27-000-2001-0479-01  
Acumulados Nos. 2000-0428, 2001-0122, 2001-0343  
Actor: GUSTAVO MOYA ÁNGEL Y OTROS  
Acción Popular

Adujo que de la parte resolutive y, en particular, frente a la orden en comento, puede inferirse que sólo aplica el punto referido a la planeación en vista de que el Departamento Nacional antes que ejecutor es precisamente un organismo de planeación.

Aseguró que la sentencia hasta ese momento y en punto de las condenas no existe obligación alguna pues la orden antes de ser considerada como tal debe ser entendida como una forma de asegurar la defensa del derecho colectivo tutelado en la sentencia.

A pesar de lo anterior, alegó que el panorama se modificó con la sentencia complementaria pues, por el lado de las costas no se condenó a las responsables sino a los demandados, asunto que tiene dos implicaciones:

- El establecimiento de una carga condenatoria consistente en pagar una suma de dinero, frente a un sujeto exonerado de responsabilidad en la primera sentencia que en un apartado como este debió permanecer inmutable para ser revisada sólo eventualmente por el Juez de segunda instancia.
- El establecimiento de una carga condenatoria que con independencia de que los juicios de responsabilidad de diverso orden se discutan en procesos distintos serviría como punto de partida para la configuración de estos.

En este sentido, solicitó que se revoque el numeral 10 de la parte resolutive de la sentencia complementaria, en lo que tiene que ver con el Departamento, en el entendido de

Expediente No. 25000-23-27-000-2001-0479-01  
Acumulados Nos. 2000-0428, 2001-0122, 2001-0343  
Actor: GUSTAVO MOYA ÁNGEL Y OTROS  
Acción Popular

que fue exonerado de cualquier responsabilidad en el daño al río Bogotá y, por esta vía, no existe fundamento para ubicar en su cabeza condena alguna como la del pago de las costas del proceso.

Expuso que los obligados al pago de las costas son aquellos que se mencionan conforme al numeral primero de la sentencia original o aquellos que se mencionan en el numeral undécimo en los porcentajes establecidos en la parte motiva.

Afirmó que la pretensión se fundamenta en la extralimitación de las facultades del juez de primera instancia al manifestarse sobre la complementariedad o adición a la sentencia que fuera solicitada.

Consideró que incluso la insuficiencia de la prueba frente a las costas en que eventualmente incurrió no procedían las condenas sobre las mismas, no mucho menos las relativas al reconocimiento de los gastos del apoderado.

Explicó la inexistencia del nexo causal entre la presunta omisión del Departamento Nacional de Planeación y el daño por contaminación del río Bogotá. Asimismo se refirió al hecho de que la entidad no hace parte del Sistema Nacional Ambiental por lo que no puede ser responsable a título de omisión, por la contaminación del mismo. Resaltó la errónea calificación como autoridad ambiental.

Pidió la revocatoria del numeral tercero literal x) en el sentido de restringir nuevos estudios ambientales sin que

Expediente No. 25000-23-27-000-2001-0479-01  
Acumulados Nos. 2000-0428, 2001-0122, 2001-0343  
Actor: GUSTAVO MOYA ÁNGEL Y OTROS  
Acción Popular

exista autorización de la Mesa Regional de la cuenca del río Bogotá y los demás sujetos que se mencionan en la parte motiva porque atropella la Constitución Política en lo atinente al régimen Económico y de Hacienda Pública.

En el mismo sentido solicitó la revocatoria del numeral quinto, relativo al aval y pago de créditos por parte de la Nación del crédito de la Empresa de Acueducto y Alcantarillado de Bogotá, toda vez que el Decreto 610 de 2002, relativo al endeudamiento de las entidades descentralizadas del nivel territorial, impide al juez ordenar esa clase de endeudamiento, ni podía determinar un aval en cabeza de la Nación y mucho menos que los créditos fueran asumidos por la Nación, con esto afecta gravemente la política crediticia del país.

Finalmente, dijo que se debe modificar el numeral tercero literal v, de la parte resolutive de la sentencia, ya que el FNR, no tiene deudas pendientes por pagar con el Distrito Capital ni los municipios.

#### **VII.9. APELACIÓN DEL DEPARTAMENTO TÉCNICO ADMINISTRATIVO DEL MEDIO AMBIENTE - DAMA**

El Subdirector de Gestión Judicial de la Alcaldía Mayor de Bogotá sustentó el recurso de apelación interpuesto contra la sentencia proferida el 25 de agosto de 2004, circunscribiendo el mismo al reconocimiento del incentivo, toda vez que la obligación impuesta por el Tribunal no corresponde a la filosofía y finalidades previstas por el legislador al establecer ese tipo de beneficios.

Expediente No. 25000-23-27-000-2001-0479-01  
Acumulados Nos. 2000-0428, 2001-0122, 2001-0343  
Actor: GUSTAVO MOYA ÁNGEL Y OTROS  
Acción Popular

Afirmó que el reconocimiento económico se sujeta a la labor activa, diligente y oportuna de los actores para propiciar una solución a la problemática denunciada a través de las acciones populares.

Recordó que no es el simple reconocimiento de la calidad de demandante lo que hace viable la imposición de la condena a título de incentivo, sino la conducta procesal que se asuma en el transcurso del proceso.

Resaltó que se constató que los actores simplemente se limitaron a denunciar hechos genéricos a los que han tildado de notorios pero nunca aportaron un medio de convencimiento para la jurisdicción que advirtiera o proporcionara una solución concreta a la problemática presentada con el río Bogotá.

Agregó que el proceder de los actores se limitó a cuestionar todas las actuaciones de los demandantes sin ningún sustento probatorio, por lo que carece de sentido que el Tribunal reconozca el incentivo por el simple hecho de haber demandado sin analizar la conducta individual de los actores y su labor diligente en procura de la protección de los derechos colectivos.

Finalmente, el actor se limitó a interponer recurso de apelación frente a la sentencia complementaria pero sin hacer manifestación alguna sobre su inconformidad con ésta (fl. 6457).

Expediente No. 25000-23-27-000-2001-0479-01  
Acumulados Nos. 2000-0428, 2001-0122, 2001-0343  
Actor: GUSTAVO MOYA ÁNGEL Y OTROS  
Acción Popular

#### **VII.10. APELACIÓN DE LA ASOCIACIÓN DE CURTIDORES DE VILLAPINZÓN-ACURTIR**

El apoderado judicial de Acurtir al sustentar el recurso de apelación interpuesto manifestó que la decisión proferida por el Tribunal resulta violatoria de su derecho constitucional fundamental al debido proceso por cuanto la asociación no ha sido parte en el proceso.

Adujo que ni Acurtir ni sus miembros pudieron ejercer su derecho a la defensa como tampoco pudieron presentar pruebas y controvertirlas, a pesar de ello comentó que se vieron afectados por la decisión.

Expuso que se vulneró el debido proceso por falta de controversia de la prueba. Comentó que la sentencia afirma abiertamente en su parte resolutive que los curtidores invadieron ilegalmente la zona de la ronda del río Bogotá, lo cual como se dijo es absolutamente violatorio de sus derechos fundamentales y de la protección constitucional a la buena fe.

Advirtió que esas afirmaciones deben ser probadas con hechos fehacientes, que la presunción de legalidad que ampara a los títulos de propiedad expedidos por el Estado debe ser desvirtuada judicialmente en un proceso que respete las garantías mínimas.

De otro lado, aseguró que se vulneró su derecho constitucional a la propiedad consagrado en el artículo 58 de la Constitución Política, el cual dispone que solo por motivos de utilidad pública o de interés social

**Expediente No. 25000-23-27-000-2001-0479-01**  
**Acumulados Nos. 2000-0428, 2001-0122, 2001-0343**  
**Actor: GUSTAVO MOYA ÁNGEL Y OTROS**  
**Acción Popular**

definidos por el legislador, podrá haber expropiación mediante sentencia judicial e indemnización previa.

Alegó que si el Tribunal considera que se debe desalojar por razones de interés general a los curtidores debería acudir al procedimiento regulado por las Leyes 388/1997, 9/1989, 3/1991, y no a la acción popular.

Expuso que si el Estado detenta una propiedad irregular o desea expropiarlos por razones de utilidad pública debe iniciar los procesos judiciales respectivos, que en caso de culminar una orden judicial de expropiación, deben decretar las indemnizaciones correspondientes con el fin de resarcir los perjuicios que la orden de extinción de dominio a favor del Estado cause a los particulares afectados.

El apoderado indicó que el Estado mediante sus actuaciones ha generado en las personas que se ubican en la zona de ronda del río Bogotá una confianza legítima sobre la propiedad de los terrenos que habitan y el derecho que a éstas asiste sobre los mismos, al punto que le fueron expedidos documentos legales que acreditan su titularidad.

Igualmente, afirmó que se violaron los derechos fundamentales al trabajo, al mínimo vital y a la igualdad, en cuanto la sentencia afecta gravemente a las familias especialmente a los menores de edad.

Comentó que la imposibilidad de que los curtidores trabajen en estas tierras por el desalojo de los predios

Expediente No. 25000-23-27-000-2001-0479-01  
Acumulados Nos. 2000-0428, 2001-0122, 2001-0343  
Actor: GUSTAVO MOYA ÁNGEL Y OTROS  
Acción Popular

en el cual son propietarios implica la violación de los referidos derechos fundamentales.

**VII.11. APELACIÓN DE LA COMPAÑÍA BOGOTANA DE  
AGUAS Y SANEAMIENTO SUEZ LYONNAISE DES EAUX  
DEGREMONT E.S.P. S.A. -BAS-**

Mediante escrito allegado al plenario, el apoderado judicial de la sociedad sustentó el recurso de la siguiente manera:

Consideró que con la liquidación del contrato de concesión 015 de 1994, celebrado el 20 de septiembre de 1994 entre el Distrito Capital y BAS, la compañía cumplió cabalmente sus obligaciones contractuales y no incurrió en responsabilidad fiscal que lo haga acreedor de una investigación.

Anotó que el recurso se fundamenta en la inexistencia y ausencia absoluta de los elementos, condiciones y requisitos que configuren la responsabilidad fiscal y la penal de conformidad con las Leyes 610-2000 y 599-2000.

Mencionó que cumplieron plenamente con los lineamientos y parámetros técnicos consagrados en el pliego de condiciones de la licitación 001 de 1994, que debían tenerse en cuenta para diseñar la PTAR El Salitre.

Argumentó que el Tribunal pretende cuestionar la forma como fue diseñada la Ptar Salitre con ocasión de la ejecución del contrato de Concesión 015 de 1994, el cual fue celebrado el 20 de septiembre de 1994.

Expediente No. 25000-23-27-000-2001-0479-01  
Acumulados Nos. 2000-0428, 2001-0122, 2001-0343  
Actor: GUSTAVO MOYA ÁNGEL Y OTROS  
Acción Popular

Por lo anterior, solicitó la revocatoria parcial del numeral 9º de la parte resolutive de la sentencia, en el sentido de suprimir la orden de que se compulsen copias *"de las piezas procesales pertinentes con destino a la Contraloría General de la República y la Fiscalía General de la Nación para que investiguen el detrimento que al fisco ha causado, como las conductas ilícitas en que se haya podido incurrir..."*.

#### **VII.12. APELACIÓN DE LA EMPRESA DE ACUEDUCTO Y ALCANTARILLADO DE BOGOTÁ - E.A.A.B. E.S.P**

El apoderado de la empresa distrital presentó recurso de apelación contra la sentencia de instancia y lo sustentó de la siguiente forma:

Dijo que se aparta de lo ordenado en el numeral 5º de la parte resolutive por cuanto la empresa es, en razón de sus funciones, la entidad pública que debe asumir la responsabilidad de prestar los servicios públicos de acueducto y alcantarillado a los habitantes del Distrito Capital, además contribuye con su esfuerzo financiero e institucional en el tratamiento de las aguas residuales que se producen en la capital.

Agregó que por su experiencia y dimensión colabora además en la prestación del servicio en algunos municipios vecinos de Bogotá, por lo que su posición siempre ha sido proactiva y constructiva.

Resaltó que la alternativa aprobada por la juez de instancia es el fruto de años de trabajo de los mejores

Expediente No. 25000-23-27-000-2001-0479-01  
Acumulados Nos. 2000-0428, 2001-0122, 2001-0343  
Actor: GUSTAVO MOYA ÁNGEL Y OTROS  
Acción Popular

expertos en el tema coordinados por la E.A.A.B., que además durante las mesas de trabajo tuvieron la posibilidad de exponer y discutir con todos aquellos que así lo solicitaron.

Se refirió a que la decisión del Tribunal de adelantar la construcción de la Ptar Canoas para el 2009 no puede ser compartida por la empresa pues ello significa poner en peligro la viabilidad técnica y financiera de esta solución integral por lo siguiente:

- a. Expresó que para iniciar las obras de la planta se requiere previamente terminar el estudio de diseño de la Planta de Tratamiento de Canoas pues cuenta apenas con estudios de predimensionamiento, luego solicitar la licencia ambiental, además de adelantar las gestiones ante el Municipio de Soacha para obtener los permisos correspondientes.
- b. Resaltó que el tiempo mínimo que se requiere para hacer todo lo descrito en la decisión acelerando al máximo los tiempos sería de 15 años contados a partir de la ejecutoria de la sentencia.

Por lo anterior, concluyó que los plazos para la construcción de la planta para el año 2009 no es un término prudencial tal y como está dispuesto en el artículo 34 de la Ley 472 de 1998. Ahora bien, comentó que si esta Corporación considera que la construcción de los interceptores ordenados debe entrar a operar al mismo tiempo que la planta deberá ajustar el tiempo de construcción de estas obras.

Expediente No. 25000-23-27-000-2001-0479-01  
Acumulados Nos. 2000-0428, 2001-0122, 2001-0343  
Actor: GUSTAVO MOYA ÁNGEL Y OTROS  
Acción Popular

Expresó que también resulta imposible la orden impartida en relación con la separación de los alcantarillados, pues éstos en la mayoría de los casos se encuentran combinados desde el interior de las casas y, significaría volver a construir la ciudad. En este sentido, anotó que la apelación del numeral 4º, literal b), se hace necesaria por razones de conexidad técnica, toda vez que ellos se articulan íntimamente con la construcción de los interceptores.

En suma, arguyó que no sólo debe tenerse en cuenta la gravedad del asunto para fijar en la sentencia el término prudencial sino la amplitud de su reparación.

De otro lado, el apoderado se pronunció sobre la distribución de las cargas financieras, al efecto anotó que si bien es imposible realizar las obras en un tiempo tan corto, la carga impuesta a la empresa pone en grave riesgo la estabilidad económica de la misma, además reduciría la posibilidad de llevar a cabo el Plan de Obras propuesto en el pacto de cumplimiento.

En su sentir se encuentra en la obligación de solicitar una modificación al cronograma de inversión definido en la providencia, extendiéndolo más allá del año 2012, dada la magnitud de recursos y de las obras necesarias para el cumplimiento del mismo.

Añadió que en caso de ejecutarse las obras con los recursos y fechas que ordena el fallo sin que exista un cierre financiero resultante del consenso interinstitucional de aportes financieros para incorporar

Expediente No. 25000-23-27-000-2001-0479-01  
Acumulados Nos. 2000-0428, 2001-0122, 2001-0343  
Actor: GUSTAVO MOYA ÁNGEL Y OTROS  
Acción Popular

dichos montos en las proyecciones, se pondrá en muy grave riesgo la sostenibilidad financiera y operacional del Acueducto de Bogotá, con las graves implicaciones para la sociedad derivadas de la pérdida de capacidad de la Empresa para continuar prestando los servicios básicos.

Arguyó que la aplicación de la sentencia ante la imprecisión de instancias generadoras de recursos ubican el tema de las aguas residuales en la indefinición de un marco tarifario.

Por las anteriores consideraciones, la E.A.A.B. aseveró que no es equitativa la forma como la sentencia apelada señala que la Nación debe aportar recursos para las obras que no están financiadas.

En lo atinente a la sentencia complementaria de 16 de septiembre de 2004, precisó que el otorgamiento del incentivo económico a los demandantes es suficiente estímulo y reconocimiento.

**VIII.13. APELACIÓN DE LA CORPORACIÓN AUTÓNOMA REGIONAL DE CUNDINAMARCA - CAR.** El apoderado judicial de la CAR en escrito visible a folios 6658 a 6697 del expediente, aseveró que el trámite que se le dio al proceso de acción popular y que culminó con la sentencia que hoy se impugna, no correspondió a ninguna de las dos formas de terminación por cuanto se adelantó un procedimiento híbrido muy distinto al previsto en la ley, en el cual el proceso terminó simultáneamente por la expedición de una sentencia de fondo que definió algunos aspectos de la

Expediente No. 25000-23-27-000-2001-0479-01  
Acumulados Nos. 2000-0428, 2001-0122, 2001-0343  
Actor: GUSTAVO MOYA ÁNGEL Y OTROS  
Acción Popular

litis, y a su vez a través de la aprobación de unos supuestos pacto de cumplimiento.

Indicó que la sentencia impugnada desconoce lo dispuesto en los artículos 27 y 38 de la Ley 472 de 1998, toda vez que le dio al proceso un manejo diferente al ordenado en la ley, además, no terminó el proceso, como allí se prescribe.

Enunció que el Tribunal sostiene en distintos apartes de su decisión que las partes aprobaron pactos de cumplimiento y, además, que defirieron en el juez la posibilidad de introducir a los mismos las modificaciones que *"el despacho en su sentencia considere"*, lo cual no es exacto ni jurídico, pues las partes nunca aprobaron pactos de cumplimiento como tales, ni podían delegar en el juez la posibilidad de introducir en ellos los ajustes que él a bien tuviera.

En primer lugar sostuvo que en el expediente no existe constancia alguna de que todas la partes interesadas, tal y como exige el artículo 27, hubieran dado su aquiescencia clara y expresa a la aprobación de las distintas propuestas de pacto que se presentaron, ni que entre ellas hubiera acuerdo sobre la manera de restablecer los derechos colectivos supuestamente vulnerados.

Comentó que existen varias actas suscritas exclusivamente por la Magistrada, por su Secretaria y algunas por el Ministerio Público, de las cuales se desprende que entre el periodo transcurrido entre el 6 de octubre y el 19 de

Expediente No. 25000-23-27-000-2001-0479-01  
Acumulados Nos. 2000-0428, 2001-0122, 2001-0343  
Actor: GUSTAVO MOYA ÁNGEL Y OTROS  
Acción Popular

noviembre de 2003, cada uno de los demandados sometió a consideración de los asistentes a las audiencias fijadas para tal propósito unas propuestas individuales de pacto, que fueron explicadas y debatidas en el seno de cada reunión, pero que a pesar de ello no existe una sola acta en la cual conste un acuerdo de voluntades que esté suscrito y refrendado por todos los intervinientes.

Precisó que la ausencia de firma de las actas no es un hecho jurídicamente irrelevante, toda vez que dicha falencia constituye la prueba por excelencia de la ausencia de manifestación del consentimiento por las partes para la celebración de cualquier acuerdo de voluntades.

Observó que anexas a las actas existen constancias de asistencia, las cuales no son más que eso, es decir, meras constancias de asistencia que no tienen ni podrían tener la virtud de ser prueba de aprobación de pactos de cumplimiento. Adicionalmente, advirtió que muchas otras actas confirman la ausencia de consenso.

Encontró que dentro del proceso existen múltiples manifestaciones de que las partes jamás aprobaron los pactos de cumplimiento a que se refiere la sentencia impugnada.

De otro lado, el apoderado se pronunció sobre la delegación indebida del juez en cuanto nada más contrario a derecho que una autorización amplia y genérica a un juez de conocimiento para que introduzca en un pacto de cumplimiento las modificaciones y consideraciones.

Expediente No. 25000-23-27-000-2001-0479-01  
Acumulados Nos. 2000-0428, 2001-0122, 2001-0343  
Actor: GUSTAVO MOYA ÁNGEL Y OTROS  
Acción Popular

Recordó que el pacto de cumplimiento es una forma de terminación del proceso en el que las partes celebran un acuerdo fruto de la expresión de su mutuo consentimiento y que la intervención del juez se limita al control de legalidad de dicho acuerdo, motivo por el cual jamás podrán las partes deferir en él el contenido así sea parcial del mismo.

Manifestó que el juez de instancia adoptó una decisión híbrida por lo siguiente:

- El Tribunal profirió decisión de fondo respecto a una parte de la controversia.
- Aprobó pactos de cumplimiento sobre acuerdos que habían llegado las partes con temas relacionados con la litis.
- Introdujo cambios a los temas acordados por algunas de las partes. Expidiendo una sentencia que terminó las acciones populares de dos maneras diferentes pero simultáneas, de un lado aprobando unos pactos de cumplimiento y del otro dictando sentencia de fondo definitiva de las pretensiones.

Manifestó que del texto de la sentencia impugnada, como de la lectura de las actas en las que supuestamente se aprobaron algunos de los pactos de cumplimiento propuestos por las partes, se desprende que nunca las partes aprobaron un solo pacto de cumplimiento que recogiera las propuestas de todas ellas y que proveyera por una solución integral de la materia objeto de la litis.

Expediente No. 25000-23-27-000-2001-0479-01  
Acumulados Nos. 2000-0428, 2001-0122, 2001-0343  
Actor: GUSTAVO MOYA ÁNGEL Y OTROS  
Acción Popular

Comentó que por el contrario es indudable que las partes aprobaron un conjunto de propuestas parciales y yuxtapuestas de varias de ellas que en ningún momento proveyeron soluciones integrales a los derechos supuestamente vulnerados.

Manifestó que muchos de los temas objeto de debate en las audiencias no fueron materia de acuerdo, en razón a lo anterior los acuerdos suscritos fueron parciales y, por ende, violatorios de los artículos 27 y 38 de la Ley 472 de 1998.

Solicitó la revocatoria del numeral 3º literal e) de la parte resolutive, toda vez que se violó el artículo 29 de la C.P., el artículo 5º de la Ley 472 y el Decreto 1180 de 2003, lo anterior al desconocer el derecho al debido proceso de los beneficiarios de las licencias, que no fueron citados a comparecer a la presente acción. De otro lado, manifestó que se omitió la aplicación de los artículos 62 y siguientes de la Ley 99 del 1993 relacionados con el otorgamiento de licencias ambientales.

Igualmente requirió pronunciamiento favorable de modificar el numeral 3º, literal i), de la parte resolutive, al quebrantarse los artículos 6º y 209 de la Constitución Política, toda vez que la CAR cuenta con una red hidrometeorológica de su propiedad, con más de 100 estaciones de monitoreo a lo largo del río Bogotá, y de acuerdo a la obligación impuesta por el Tribunal debe ponerla a disposición del IDEAM de manera gratuita, generando un desmedro al patrimonio de la entidad.

Expediente No. 25000-23-27-000-2001-0479-01  
Acumulados Nos. 2000-0428, 2001-0122, 2001-0343  
Actor: GUSTAVO MOYA ÁNGEL Y OTROS  
Acción Popular

Pidió la revocatoria del numeral 4° de la sentencia, consistente en la ampliación de la PTAR Salitre y la construcción de la PTAR Canoas, por cuanto la entidad nunca manifestó su consentimiento con la aprobación de los pactos de cumplimiento. Así, consideró que se están violando los artículos 113 de la Constitución Política, 44 de la Ley 99 de 1993 y los Decretos 1339 de 1994 y 1200 de 2004.

Asimismo, solicitó lo siguiente:

- Que se revoque el numeral 4 literal h), al quebrantarse los artículos 113-209 de Constitución Política, y el artículo 68 de la Ley 489 de 1998, teniendo en cuenta que la CAR tiene un plan de dragado y al modificar la sentencia como lo dicen los puntos 6.9 y 6.9.310, se desconoce el principio de especialidad de la administración, por lo que en una decisión de esta naturaleza no se pueden emitir órdenes que revoquen las competencias exclusivas de la administración.
- Que se revoque el numeral 5° literal d) por violación del artículo 45 de la Ley 99 de 1993, el Decreto 1333 de 1994 y el Decreto 1729 de 2002, al atentar contra el principio de separación de poderes. Mencionó que es la CAR y no el juez de acción popular la autoridad que debe señalar los programas y el monto de las inversiones que se deben efectuar en las cuencas hidrográficas del área de su jurisdicción.

Expediente No. 25000-23-27-000-2001-0479-01  
Acumulados Nos. 2000-0428, 2001-0122, 2001-0343  
Actor: GUSTAVO MOYA ÁNGEL Y OTROS  
Acción Popular

- Que se revoque el numeral 3º, literal h), por violación de los artículos 6 y 113 de la Constitución Política, artículo 10º de los estatutos de la CAR. Consideró lo anterior por cuanto dichas disposiciones consagran que los servidores públicos sólo pueden hacer lo que está expresamente permitido, además no se observó el principio de la separación de poderes.
- Que se revoque el numeral 4º, literal c), por violación del artículo 113 de la Constitución Política, la Ley 142 de 1994 y el Decreto 1200 de 2004. Anotó que se desconoció el principio a la separación de poderes y las normas que garantizan la libre competencia en la prestación de los servicios públicos domiciliarios, toda vez que la contratación de un solo operador regional para la prestación del servicio de tratamiento de aguas residuales atentaría contra los principios de la libre competencia.
- Que se revoque el numeral 4º, literal f), por violación del artículo 113 de la Constitución Política, artículo 45 de la Ley 99 de 1993, Decreto 1933 de 1994 y el Decreto 1729 de 2002. Preciso que se atenta contra las normas de planificación ambiental, ya que la CAR al recibir las transferencias del sector eléctrico es la única que tiene la obligación y la competencia exclusiva de determinar las condiciones y proyectos en que deben invertirse dichos recursos y no es competencia del juez de acción popular.

Expediente No. 25000-23-27-000-2001-0479-01  
Acumulados Nos. 2000-0428, 2001-0122, 2001-0343  
Actor: GUSTAVO MOYA ÁNGEL Y OTROS  
Acción Popular

Con relación al plan de vida Muña 2000, comentó que el juez desconoció la política de la CAR en lo referente al manejo del embalse, vulnerando el principio de la separación de poderes.

- Que se revoque el numeral 3º, literal e), por violación de los artículos 6º y 113 de la Constitución Política, lo anterior en razón a que la función de reubicar a las personas no es competencia de la CAR sino del Ministerio de Ambiente, Vivienda y Desarrollo Territorial.

**VII.14. APELACIÓN DE LAS SOCIEDADES ALPINA PRODUCTOS ALIMENTICIOS S.A. - ALPINA - ETERNIT COLOMBIANA S.A. - LIQUIDO CARBÓNICO COLOMBIANA S.A. SOCIEDAD CRISTALERÍA PELDAR S.A. - REFINADORA SAL S.A. - REFISAL - CERVECERÍA LEONA S.A. - GRUPO SIDERÚRGICO DIACO S.A.**

El Representante legal de las sociedades demandadas y vinculadas al proceso solicitó en escrito contentivo del recurso de apelación se decrete la nulidad por indebida notificación de estas entidades y se revoque el ordinal primero en cuanto a la condena en costas a favor de los accionantes, fundamentó lo anterior con los artículos 37 de la Ley 472 y 352 C.P.C.

Manifestó que no se resolvió la excepción de ausencia de legitimidad pasiva propuesta por la SOCIEDAD CRISTALERIA PELDAR S.A. Adujo que en la providencia del 1º de abril de 2002 se vincularon varias empresas dentro del proceso

Expediente No. 25000-23-27-000-2001-0479-01  
Acumulados Nos. 2000-0428, 2001-0122, 2001-0343  
Actor: GUSTAVO MOYA ÁNGEL Y OTROS  
Acción Popular

y allí se encontraba la Compañía Nacional de Vidrios S.A. CONALVIDRIOS, notificándose indebidamente por cuanto entregaron la copia de la demanda y de la providencia en las instalaciones de Vidriera Fenicia.

Aseguró que la nulidad no fue saneada en debida forma, toda vez que no se realizó la notificación personal a los representantes legales de cada una de las industrias. Alegó que dicha situación no se resolvió y el vicio de nulidad permaneció, sin que se pronunciara en la sentencia.

En cuanto a la condena de costas, expuso que las mismas carecen de fundamento legal ya que estas industrias tienen permisos ambientales y el control ejercido por las autoridades demostraba que su conducta se ajustaba a la ley.

Afirmó que en la sentencia de primera instancia no se responsabiliza a ninguna de las entidades, ni se condenó por infracciones al ambiente sano, por lo tanto no procede la condena en costas.

Consideró que el pacto de cumplimiento se realizó para colaborar con la solución de este problema, pero no se reconoció ninguna responsabilidad toda vez que sólo se enfatizó en que las empresas actuaban conforme a la ley y tenían permisos de la autoridad ambiental, por lo tanto no era procedente la condena en comento.

De otro lado, anotó que no se resolvió el llamamiento en garantía propuesto por **REFISAL.S.A.** Mencionó que en la

Expediente No. 25000-23-27-000-2001-0479-01  
Acumulados Nos. 2000-0428, 2001-0122, 2001-0343  
Actor: GUSTAVO MOYA ÁNGEL Y OTROS  
Acción Popular

contestación de la demanda **REFINADORA SAL S.A.** solicitó se llamara en garantía a **ALCALIS DE COLOMBIA Ltda.**-en liquidación, en virtud del contrato de venta, protocolizado en la escritura pública 0104 del 7 de marzo de 1994, Notaría 52 de Bogotá, en cuya cláusula 10 se exonera al comprador de toda responsabilidad y eventuales reclamos ambientales.

#### **VII.15. APELACIÓN DE LA SOCIEDAD CONSTRUCTORA PALO ALTO Y CIA S EN C.**

Mediante escrito allegado al plenario, el representante legal de la sociedad Constructora Palo Alto sustentó el recurso interpuesto, al efecto anotó que en cuanto a las notificaciones, si bien es cierto que la misma se realizó en un medio masivo de comunicación, también lo es que se hizo contra personas determinadas y empresas con nombre propio, por tal razón la sociedad no se entendió notificada.

Señaló que se debe revocar el ordinal 3º, literales b), c) y d) de la parte resolutive de la sentencia y, en su lugar, estarse a lo dispuesto en la sentencia de 8 de mayo de 2003 de la Sección Quinta de esta Corporación, toda vez que la orden de revocar y suspender los títulos, permisos, concesiones y licencias de las exploraciones mineras en las zonas de exclusión, extiende sus efectos jurídicos con desconocimiento absoluto de los derechos que de estos se derivan, sin que le haya permitido controvertir y ejercer el derecho de defensa.

Expediente No. 25000-23-27-000-2001-0479-01  
Acumulados Nos. 2000-0428, 2001-0122, 2001-0343  
Actor: GUSTAVO MOYA ÁNGEL Y OTROS  
Acción Popular

Dijo que se violó el debido proceso ya que en la sentencia, los numerales 6.5.I.4., 6.5.1.5., 6.5.1.7., 5.6.1.8, 6.5.1.8.1., 6.5.1.9. y tercero literales b) y d) del resuelve se ordenó excluir y cerrar una actividad legal, contratos de concesión minera Nos. 16.569 y 16.715, orden que no tiene sustento en el proceso y que nunca fue notificado.

Reiteró la violación al legítimo derecho a la defensa, artículo 140.del C.P.C al ordenar en el fallo excluir y cerrar una actividad legal, sin haber realizado estudio técnico, económico, social y ambiental y sin notificar desde un principio a la sociedad, de los contratos de concesión firmados con la Nación - Ministerio de Minas y Energía.

#### **VII.16. APELACIÓN DE LA SOCIEDAD INDUSTRIAS SPRING S.A.**

A través de escrito fechado el 28 de septiembre de 2004 (fls. 6446 a 6448), el apoderado judicial fundamentó su recurso solicitando se excluya del pago de condena en costas y agencias en derecho, lo anterior en razón a su vinculación oficiosa sin que hubiera sido demandada al no realizar ningún proceso de fabricación, transformación o producción que contaminara la represa del Muña o el río Bogotá, porque su proceso era simplemente ensamblaje.

Expresó que ni en la parte motiva se aprobó el pacto de cumplimiento o se hizo alusión a algún tipo de condena, ni tampoco en la parte resolutive se condenó o mencionó a la sociedad, por lo que quedó absuelta de toda

Expediente No. 25000-23-27-000-2001-0479-01  
Acumulados Nos. 2000-0428, 2001-0122, 2001-0343  
Actor: GUSTAVO MOYA ÁNGEL Y OTROS  
Acción Popular

responsabilidad, no entendiendo la razón de la condena en costas.

#### **VIII.17. APELACIÓN DE LA SOCIEDAD STANTON & CÍA LTDA.**

El apoderado judicial de la sociedad aseveró en escrito aportado al proceso que la sociedad fue demandada y al contestar los supuestos en que se fundamentaba rechazó los cargos que le hacían como agente contaminador.

Recordó que dentro del proceso presentó pacto de cumplimiento con el fin de proteger los derechos colectivos vulnerados y que como en las sentencias del 25 de agosto y el 16 de septiembre de 2004 no se reconoció a la sociedad como un agente contaminador del río Bogotá y el Embalse del Muña, no hay lugar a la condena de costas.

Solicitó la ratificación de la existencia y valor jurídico del pacto de cumplimiento propuesto por Stanton & Cía Ltda., por cuanto fue presentado como expresión de su propia voluntad institucional.

Pidió la revocatoria del numeral 1º de la sentencia de 16 de septiembre de 2004 en lo que le corresponde a ella al no haberse probado los elementos propios de la responsabilidad y al haber elaborado un pacto de cumplimiento.

En cuanto a la aprobación del pacto de cumplimiento, manifestó su preocupación al haberse juzgado equivocadamente a la sociedad. Mencionó que la compañía

Expediente No. 25000-23-27-000-2001-0479-01  
Acumulados Nos. 2000-0428, 2001-0122, 2001-0343  
Actor: GUSTAVO MOYA ÁNGEL Y OTROS  
Acción Popular

entiende que su acción debe estar dirigida a buscar un mejoramiento continuo en el proceso de recirculación de agua y que las mismas constituyen los saldos del proceso para recibir un eficiente tratamiento que asegure su integridad.

#### **VII.18. APELACIÓN DE LA SOCIEDAD PAPELES Y CORRUGADOS ANDINA S.A.**

El representante de la sociedad solicitó se ratifique la sentencia y el valor jurídico del pacto de cumplimiento propuesto, lo anterior en razón a que tiene todo el valor y la eficacia al ser un mecanismo que concreta la protección de los derechos colectivos por iniciativa de los involucrados en el trámite del proceso.

#### **VII.19. APELACIÓN DE LA EMPRESA DE ENERGÍA DE BOGOTÁ - E.E.B.-**

El apoderado judicial de la empresa indicó que la condena es incompatible con la aprobación del pacto de cumplimiento presentado, por lo tanto debe revocarse de manera parcial el fallo impugnado en el sentido de excluirla del numeral 1º de la parte resolutive, y quede vigente el numeral 4º, literal f, por las siguientes razones:

- a. Sostuvo que al presentar la E.E.E.B. un pacto de cumplimiento que fue aprobado en la decisión de instancia, tiene derecho a que los reclamos y

Expediente No. 25000-23-27-000-2001-0479-01  
Acumulados Nos. 2000-0428, 2001-0122, 2001-0343  
Actor: GUSTAVO MOYA ÁNGEL Y OTROS  
Acción Popular

pretensiones incoados en su contra sean sustraídos como tema de juzgamiento.

- b. Comentó que cuando se suscribe y se logra un pacto de cumplimiento no se puede condenar ni absolver en el fallo, sin que este pueda continuar con otros aspectos centrales del litigio.
- c. Anotó que el juez que apruebe un pacto de cumplimiento carece de jurisdicción para proferir fallo en contra o a favor del mismo litisconsorte.
- d. Resaltó que no tiene sentido suscribir un pacto de cumplimiento, someterse al trámite de su aprobación para luego ser condenado, lo anterior lesiona los derechos al debido proceso y a la defensa.

Asimismo, pidió que se revoque parcialmente la sentencia en lo relacionado con la declaratoria de improcedencia de la denuncia del pleito a la CAR y el llamamiento de garantía de la Aseguradora Colseguros S.A., por cuanto al sustentar que no hay riesgo asegurable porque cuando se suscribió la póliza ya estaba causado el siniestro es improcedente.

Precisó que no se configura la excepción de mérito propuesta por la aseguradora denominada *"agravación y ocultamiento del riesgo por causa imputables a los interesados"*, en razón a que el siniestro se concreta con la ejecutoria del fallo que declare la responsabilidad civil extracontractual.

Advirtió que tampoco prospera la excepción del *"siniestro no amparado"*, ya que de quedar ejecutoriada

Expediente No. 25000-23-27-000-2001-0479-01  
Acumulados Nos. 2000-0428, 2001-0122, 2001-0343  
Actor: GUSTAVO MOYA ÁNGEL Y OTROS  
Acción Popular

la sentencia, correspondería una indemnización por daños derivados del medio ambiente.

Sugirió que debe fijarse como incentivo global la suma de 50 s.m.l.m.v. a favor de todos los demandantes, lo expuesto porque hubo exceso en la fijación y la regulación porcentual del mismo.

Observó que el artículo 39 de la Ley 472 de 1998 es muy claro al indicar que no se puede exceder de 50 salarios mínimos mensuales y en este caso el incentivo asciende a 200 por ser cuatro los actores, por lo tanto debió fijarse una suma global que no excediera lo autorizado por la ley.

En conclusión, solicitó la confirmación de la decisión en cuanto a la aprobación del pacto de cumplimiento presentado por ella y la revocatoria parcial en los aspectos señalados.

## **VII.20. APELACIÓN DEL DEPARTAMENTO DE CUNDINAMARCA**

El apoderado sustentó el recurso en el sentido de solicitar la revocatoria del numeral primero de la sentencia complementaria de 16 de septiembre de 2004, por cuanto la misma fue expedida por fuera del término legal establecido para tal efecto.

Expediente No. 25000-23-27-000-2001-0479-01  
Acumulados Nos. 2000-0428, 2001-0122, 2001-0343  
Actor: GUSTAVO MOYA ÁNGEL Y OTROS  
Acción Popular

De otro lado, comentó que también constituye motivo de inconformidad con la sentencia complementaria la decisión de condenar en costas al ente territorial por cuanto quedó probado que no omitió sus deberes constitucionales en lo relativo a la conservación del medio ambiente y, por el contrario, ha cumplido con sus obligaciones de coordinación, complementariedad y concurrencia con los Municipios de la cuenca del río Bogotá.

#### **VII.21. APELACIÓN DEL MUNICIPIO DE NILO**

El apoderado judicial del ente territorial en escrito fechado el 24 de febrero de 2005 (fl. 7050), manifestó que coadyuva en todas sus partes lo expresado por los apelantes sin reserva de ninguna naturaleza.

#### **VII.22. APELACIÓN DEL SEÑOR JORGE ENRIQUE CUERVO RAMÍREZ**

Mediante escrito allegado al plenario la apoderada judicial del señor Cuervo solicitó se señalara en forma precisa el tiempo en que debe cumplir las obligaciones impuestas a la E.A.A.B. enunciadas en el numeral 3º frente a:

- a. Recuperación de los ríos interiores de Bogotá y abstención de verter aguas negras a ellos.
- b. Recuperación de las zonas de ronda de cada una de las quebradas y ríos interiores de Bogotá.

Expediente No. 25000-23-27-000-2001-0479-01  
Acumulados Nos. 2000-0428, 2001-0122, 2001-0343  
Actor: GUSTAVO MOYA ÁNGEL Y OTROS  
Acción Popular

Pidió que se determine con suma claridad el plazo que tiene el Distrito Capital y la E.A.A.B. para separar la conducción de las aguas lluvias de las aguas negras.

Consideró que se debe revocar las obligaciones de la CAR y los demás municipios relativas al Embalse del Muña, por cuanto en ninguna de las pretensiones de las diferentes demandas se hizo referencia a ellas y, por el no se puede hacer cargo de las obligaciones que les corresponden a los particulares.

Por lo anterior, requirió para que se ordene a la empresa EMGESA S.A. mantener el embalse durante toda la vida útil del mismo y durante el tiempo que permanezca a su servicio, además de asumir la operación y mantenimiento de las obras.

Finalmente, indicó que se debe revocar el numeral que reconoció el incentivo a los actores, por ir en contravía del Decreto 2303 del 1989, artículo 132, y los artículos 1005 y 2360 del Código Civil.

#### **VIII.23. APELACIÓN DE LOS CIUDADANOS DE SIBATÉ**

Los señores Alba Patricia Guaqueta y Jairo Tovar Barbosa presentaron recurso para que se revisara, revocara y anulará la sentencia del 25 de agosto de 2004, toda vez que se desconocieron los efectos de cosa juzgada que tiene la sentencia de 3 de septiembre de 2002 proferida por el Tribunal Superior del Distrito Judicial de Bogotá, Sala Civil, al haber derogado y exonerado a la E.E.B. y

Expediente No. 25000-23-27-000-2001-0479-01  
Acumulados Nos. 2000-0428, 2001-0122, 2001-0343  
Actor: GUSTAVO MOYA ÁNGEL Y OTROS  
Acción Popular

a EMGESA de la responsabilidad por la contaminación del medio ambiente del Embalse del Muña.

Comentó que el Tribunal se encontraba impedido de hacer un replanteamiento acerca de la responsabilidad de la Empresa de Energía por haber contribuido a la contaminación de la represa o Embalse del Muña, por cuanto la sentencia del señalado 3 de septiembre de 2002 había adquirido el carácter de firmeza sustancial.

**VII.24. APELACIÓN DE LOS HABITANTES DE SIBATÉ - OSCAR GUAQUETA BELLO, RAMIRO ORLANDO RAMÍREZ PRIETO, VÍCTOR JULIO SANDOVAL ZAMUDIO**

Los habitantes de Sibaté representados por los firmantes del escrito allegado al proceso solicitaron se revoque la decisión de considerarlos responsables solidarios por la contaminación del río Bogotá, con ocasión al quebranto del derecho al debido proceso.

Resaltaron que la sentencia quebranta el derecho en mención ya que no fueron citados en dicha calidad a participar en la acción popular, y en la decisión de fondo no se consignaron las razones considerativas de la vinculación.

Aclararon que la sentencia resuelve imponer condenas a los habitantes como contaminantes activos en la catástrofe ambiental del río Bogotá de la cual son ajenos y víctimas de este desastre ecológico.

Expediente No. 25000-23-27-000-2001-0479-01  
Acumulados Nos. 2000-0428, 2001-0122, 2001-0343  
Actor: GUSTAVO MOYA ÁNGEL Y OTROS  
Acción Popular

Pidieron que se revoque el artículo 1º de la sentencia del 25 de agosto de 2004, en donde se declara a los habitantes del Municipio de Sibaté como responsables solidarios por acción en la causación de la catástrofe ecológica del río Bogotá (cuenca baja) y el Embalse del Muña.

Además, solicitaron que esta Corporación i) adicione a la sentencia a los verdaderos actores del desastre ecológico del Embalse del Muña; ii) declare la responsabilidad de la E.E.B. y de EMGESA S.A., propietaria del Embalse del Muña, por la catástrofe ecológica causada tanto allí como en el Municipio de Sibaté e impongan las condenas correspondientes; iii) que en forma subsidiaria se desacumule la acción popular No 01-479, relativa al problema ambiental del Embalse del Muña de las acciones populares relacionadas con el problema ambiental del río Bogotá, ya que son diferentes los problemas de contaminación del medio ambiente planteados en una y otra acción popular.

#### **VII.25. APELACIÓN DE LA FUNDACIÓN AMIGOS DEL PLANETA**

El apoderado de la fundación presentó recurso de apelación contra la sentencia proferida por el Tribunal Administrativo de Cundinamarca, al efecto solicitó que se declare a las empresas EMGESA y E.E.B. S.A, como responsables de acción u omisión de la contaminación del Embalse del Muña, por trasvasar y utilizar durante varios años las aguas contaminadas del río Bogotá en generación de energía eléctrica, sin ser debidamente tratadas,

Expediente No. 25000-23-27-000-2001-0479-01  
Acumulados Nos. 2000-0428, 2001-0122, 2001-0343  
Actor: GUSTAVO MOYA ÁNGEL Y OTROS  
Acción Popular

produciendo impactos ambientales negativos sobre el medio ambiente y la salud de los habitantes de los alrededores.

Pidió que se les obligue a descontaminar la totalidad del mismo embalse y no en la forma superficial como presentaron en el pacto de cumplimiento aprobado por la sentencia apelada.

Además, requiere para que se ordene la conformación de un panel de expertos, para definir si la expansión de la zona norte de la ciudad de Bogotá era o no viable y en esta forma poder evaluar y tomar la mejor de las alternativas de saneamiento del río Bogotá.

Comentó que la figura de los pactos de cumplimiento debe ser mantenida y que se deben crear mecanismos para que los mismos puedan ser modificados para una mejor recuperación de los ecosistemas afectados.

De otro lado solicitó lo siguiente:

- a. Que se ordene al Ministerio de Ambiente, Vivienda y Desarrollo Territorial acoger el nuevo esquema de tratamiento de aguas residuales del Distrito.
- b. Que se ordene realizar un diagnóstico ambiental de alternativas el cual deberá hacerse por una entidad independiente a la E.A.A.B., que tenga suficiente criterio técnico y científico y realice consultas públicas y mesas técnicas con expertos de diferentes universidades de Bogotá.
- c. Que se defina el papel que tendrá el Embalse del Muña en el esquema del saneamiento del Distrito y

Expediente No. 25000-23-27-000-2001-0479-01  
Acumulados Nos. 2000-0428, 2001-0122, 2001-0343  
Actor: GUSTAVO MOYA ÁNGEL Y OTROS  
Acción Popular

que se incluyan los costos del manejo del embalse en la comparación de alternativas.

- d. Que se incluyan los costos de manejo y operación del Embalse del Muña y que sean recalculados a partir de los nuevos estudios.
- e. Que se realice de nuevo el análisis económico comparativo de las alternativas de saneamiento del Distrito Capital.
- f. Que se ordene optimizar las plantas de tratamiento de aguas residuales de los municipios de la cuenca del río Bogotá, construyendo sus lagunas de maduración o sistemas de pulimiento.
- g. Que se construyan mecanismos de desinfección para los efluentes de las plantas ya que las concentraciones de coniformes son muy altas y debido a esto el río Bogotá no es apto para el riego de ningún tipo.
- h. Que las autoridades ambientales, municipales y locales ordenen a los agricultores, floricultores y ganaderos de la cuenca del río de Bogotá, que traten el agua mediante mecanismos para tratamiento de aguas por descargas difusas.
- i. Que se ordene a las autoridades competentes, industrias y organizaciones sociales promover una campaña de comunicación educativa que busque modificar la conducta de los ciudadanos como contaminadores involuntarios de río Bogotá.

Indicó que no tiene sentido hacer una inversión tan cuantiosa en la solución técnica integral, si no se logran los usos adicionales del río al estético y

Expediente No. 25000-23-27-000-2001-0479-01  
Acumulados Nos. 2000-0428, 2001-0122, 2001-0343  
Actor: GUSTAVO MOYA ÁNGEL Y OTROS  
Acción Popular

agrícola restringido, por lo que es necesario establecer plazos.

Finalmente, comentó que el pacto presentado por la EEEB y EMGESA, habla de remoción de lodos del embalse pero no en qué cantidades y en qué zonas, por lo que solicitó se determine tal circunstancia.

#### **VII.26. APELACIÓN DE LA PROCURADURÍA GENERAL DE LA NACIÓN (fl. 6396)**

Fundamentó el recurso en los siguientes términos:

1. Se desestimen las excepciones de mérito propuestas por los demandados y se declaren solidariamente responsables de la contaminación del río Bogotá y sus afluentes, a los demandados
2. Se amparen los derechos colectivos a un ambiente sano, a la salubridad pública y a la eficiente prestación de los servicios públicos domiciliarios de los procesos acumulados.
3. Para lograr la descontaminación del río Bogotá y sus afluentes se deben observar las siguientes directrices en cuanto a la realización de obras.
  - Control de vertimientos de aguas residuales y ejecución del programa de producción más limpia en los siguientes sectores de producción: Industria casera, grande, mediana y pequeña.

Expediente No. 25000-23-27-000-2001-0479-01  
Acumulados Nos. 2000-0428, 2001-0122, 2001-0343  
Actor: GUSTAVO MOYA ÁNGEL Y OTROS  
Acción Popular

Implementado por la CAR y el DAMA, siguiendo las políticas del MAVDT, con el control de los municipios el DISTRITO CAPITAL y el DEPARTAMENTO DE CUNDINAMARCA.

- En un término máximo de 3 meses contados a partir de la notificación de esta sentencia, el MAVDT deberá proceder a delimitar de forma clara, cuales son las zonas excluidas de la minería, en donde no podrán realizarse trabajos y obras de exploración y explotación minera. Sentencia C-339/02.
- En un término máximo de 6 meses contados a partir de la notificación de esta sentencia, el MAVDT en colaboración con el MINISTERIO DE MINAS Y ENERGIA, adelantarán los procesos administrativos tendientes a revocar y suspender los títulos, permisos, concesiones y licencias de las explotaciones mineras.
- En un término máximo de 6 meses contados a partir de la notificación de esta sentencia, el MAVDT, la CAR, el DAMA y los municipios. Ley 99/93 Art. 54-55. adelantarán los procesos administrativos tendientes a revocar, las licencias ambientales, los permisos, autorizaciones o concesiones para el uso y aprovechamiento de los recursos naturales y el medio ambiente.
- En un término máximo de 6 meses contados a partir de la notificación de esta sentencia, el MAVDT, la CAR, el DAMA y los municipios, deberán exigir a los particulares, entes públicos o privados a los que se les haya

Expediente No. 25000-23-27-000-2001-0479-01  
Acumulados Nos. 2000-0428, 2001-0122, 2001-0343  
Actor: GUSTAVO MOYA ÁNGEL Y OTROS  
Acción Popular

otorgado licencias ambientales, autorizaciones, permisos o concesiones a cielo abierto, la reestructuración o sustitución morfológica y ambiental de todo el suelo intervenido en la explotación. Los beneficiarios de estas licencias deberán en un término de 4 meses siguientes a la fecha en que sean requeridos a realizar la respectiva reestructuración.

- Se previene a la CAR y al DAMA y a los demás órganos ambientales, que no podrán invertir los recursos destinados para saneamiento ambiental en programas de reforestación.
- Las familias que se encuentran lavando arenas en el río Tunjuelo, LA CAR, EL DAMA, Y EL MINISTERIO DE MINAS Y ENERGIA, deberán reubicarlos en los demás complejos mineros.
- El DISTRITO CAPITAL, el DEPARTAMENTO DE CUNDINAMARCA, y la BENEFICENCIA DE CUNDINAMARCA, deberán dar prioridad a los programas sociales y educativos de esta comunidad.
- El MINISTERIO DE AGRICULTURA Y DESARROLLO RURAL, y el MINISTERIO DE LA PROTECCION SOCIAL, deberán promover una política restrictiva sobre el riego de cultivos y brebaje de ganado con aguas del río Bogotá y sus afluentes y del Embalse del Muña.
- El incumplimiento de estas órdenes dará lugar a la compulsa de copias ante la Fiscalía General de la Nación.

Expediente No. 25000-23-27-000-2001-0479-01  
Acumulados Nos. 2000-0428, 2001-0122, 2001-0343  
Actor: GUSTAVO MOYA ÁNGEL Y OTROS  
Acción Popular

- El Alcalde Mayor de Bogotá y los alcaldes municipales deben implementar, controlar, y retener los productos agrícolas, el ganado mayor y menor y los productos pecuarios que se están alimentando con las aguas o pastos contaminados por el río Bogotá y el Embalse del Muña.
- Creación de una sola red Hidrometeorológica y estación de monitoreo de las aguas, direccionadas por el INSTITUTO DE HIDROLOGÍA METEOROLOGÍA Y ESTUDIOS AMBIENTALES, para toda el área de la cuenca del río Bogotá y de sus afluentes, con la constitución de un fondo común económico y con el aporte de los recursos que para estos casos dispongan en sus presupuestos.
- El DISTRITO CAPITAL - DAMA- la E.A.A.B. y las cuencas alta, media y baja del río Bogotá, con la dirección y coordinación de la CAR y el DEPARTAMENTO DE CUNDINAMARCA, deberán llevar un control de vertimientos de aguas domésticas, especialmente de grasas, carbohidratos, nitratos y fosfatos. El INVIMA y el MAVDT, en el término de la presente o siguiente legislatura, deberá presentar un proyecto de ley ante el Congreso, para prohibir la fabricación y uso de los detergentes que contengan fosfatos y se reglamente la producción de detergentes biodegradables con el fin de detener el proceso de eutroficación de las aguas.

Expediente No. 25000-23-27-000-2001-0479-01  
Acumulados Nos. 2000-0428, 2001-0122, 2001-0343  
Actor: GUSTAVO MOYA ÁNGEL Y OTROS  
Acción Popular

- El MINISTERIO DE EDUCACION NACIONAL deberá incluir los PRAES en la educación primaria, media, tecnológica y superior como cátedra obligatoria. La CAMARA DE COMERCIO DE BOGOTÁ, el DAMA y los que se quieran vincular a las cajas de compensación COMFENALCO, podrán colaborar con la ejecución de este programa para incentivar en la comunidad el propósito común de descontaminar el río Bogotá y sus afluentes mediante prácticas limpias. Para lo cual el canal institucional de televisión realizará propagandas.
- Para reforzar el control de los vertimientos y la vigilancia sobre los cerros, montañas, laderas, suelos y aguas de la sabana, el MAVDT y el MINISTERIO DE DEFENSA, deberán apoyar mediante la prestación de servicio militar obligatorio ambiental.
- El DEPARTAMENTO DE CUNDINAMARCA, la CAR y la BENEFICENCIA DE CUNDINAMARCA, tienen bajo su responsabilidad el control de los procesos de producción más limpia de las curtiembres de VILLAPINZON y CHOCONTA. El MAVDT Y EL MINISTERIO DE COMERCIO EXTERIOR dentro del máximo de un año contado a partir de la notificación de la sentencia deberá cofinanciar todas las obras de infraestructura que requieran dichos procesos de producción más limpia.
- El DISTRITO CAPITAL - DAMA- en coordinación con los ministerios dentro del máximo de un año contado a partir de la notificación de la

Expediente No. 25000-23-27-000-2001-0479-01  
Acumulados Nos. 2000-0428, 2001-0122, 2001-0343  
Actor: GUSTAVO MOYA ÁNGEL Y OTROS  
Acción Popular

sentencia deberán poner en funcionamiento el PARQUE DE COEFICIENTE INDUSTRIAL DE LAS CURTIEMBRES DE SAN BENITO o implementar en cada una de las industrias los procesos de producción más limpia.

- Los municipios de Cuencas Alta y Media y la E.A.A.B. de conformidad con los POT velarán por la recuperación y por la protección de las zonas de ronda, de las quebradas y afluentes del río Bogotá.
- Los municipios y el distrito deberán expedir en el término de 6 meses la reglamentación de los usos del suelo.
- Las contralorías departamentales, distritales y de la Nación deberán controlar los recursos con destino al saneamiento ambiental previstos en la ley.
- Los gremios de la producción que ejerzan actividades en la cuenca del río Bogotá y sus afluentes deberán ingresar a los procesos de producción más limpia que promuevan la CAR y el DAMA.
- Se ordena a los ministerios de PROTECCIÓN SOCIAL, DE MINAS Y ENERGÍA, DE COMERCIO EXTERIOR, DE AGRICULTURA, Y EDUCACIÓN, al DEPARTAMENTO NACIONAL DE PLANEACION para que planeen y ejecuten con el MAVDT, todos los programas relacionados con las funciones del Art. 5 de la ley 99 de 1993.

Expediente No. 25000-23-27-000-2001-0479-01  
Acumulados Nos. 2000-0428, 2001-0122, 2001-0343  
Actor: GUSTAVO MOYA ÁNGEL Y OTROS  
Acción Popular

- Se ordena a la CAR y al DAMA a que formen un grupo de guardabosques según lo previsto en el POMCO.
- Los municipios deberán dar cumplimiento a la sentencia proferida por el Tribunal.
- La CAR, el DAMA, la E.A.A.B. y los municipios, deberán velar por la adecuada destinación de los recursos para la adquisición de los predios para proteger las fuentes hídricas. Las Contralorías distritales, departamentales y de la Nación deberán ejercer control fiscal en los recursos para saneamiento ambiental.
- Los alcaldes locales del distrito deberán controlar los vertimientos.
- El Fondo Nacional de Regalías y el M.H.C.P. deberán realizar las reservas por concepto de regalías a los municipios y distritos
- Se declara que la descontaminación del río Bogotá y sus afluentes comprende la ejecución de obras.
- Los municipios como distrito Capital deberán separar las redes pluviales de las de alcantarillado desde el mismo momento de su diseño.
- Dentro del término máximo de 3 años a partir de la audiencia del pacto de cumplimiento la CAR deberá realizar las obras y las mejoras que requieran las plantas de tratamiento.
- El IDEAM deberá realizar la caracterización física, química y biológica a la entrada y salida de las plantas de tratamiento de aguas

Expediente No. 25000-23-27-000-2001-0479-01  
Acumulados Nos. 2000-0428, 2001-0122, 2001-0343  
Actor: GUSTAVO MOYA ÁNGEL Y OTROS  
Acción Popular

residuales, luego de ser puestas en óptimas condiciones para entregar a los municipios.

- Los municipios deberán construir las plantas de tratamiento que se requieran para dar total cobertura al tratamiento de sus aguas residuales. El Municipio de Villapinzón en el término de tres años a partir de la notificación de la sentencia deberá construir su planta de tratamiento.

## **VII. 26.1 AMPLIACIÓN DEL RECURSO DE APELACIÓN**

1. Se revoque, modifique o reforme algunos apartados del fallo proferido por el juez de primera instancia, para hacer efectivo el derecho fundamental de acceso integral a la Administración de Justicia y la garantía del debido proceso, al derecho de defensa de las partes y el equilibrio de las mismas.

2. En cuanto a los pactos de cumplimiento, el fallo del 25 de agosto y su complementario no es una sentencia anticipada sino definitiva, por esta razón las propuestas discutidas que hacen parte de los medios probatorios documentales son aptas e idóneas para que el juez de primera instancia profiera el fallo y el de segunda instancia adopte la decisión que corresponda una vez de ser apreciados en conjunto.

3. Con relación a la constitución del FONDO COMUN ECONOMICO para la creación de una sola red hidrometeorológica, carece de soporte jurídico, según estima el Ministerio Publico, nuestro Estado social de

Expediente No. 25000-23-27-000-2001-0479-01  
Acumulados Nos. 2000-0428, 2001-0122, 2001-0343  
Actor: GUSTAVO MOYA ÁNGEL Y OTROS  
Acción Popular

derecho se caracteriza porque ninguna autoridad estatal puede ejercer funciones distintas a las que le atribuyen la Constitución y la ley. Por lo anterior debe revocarse este punto y en su defecto reformarse para que su creación, funcionamiento y finalidad se enmarquen dentro del ordenamiento jurídico vigente.

Estas consideraciones serán tenidas en cuenta para la solución integral debiendo anotar que para el efecto se observarán las competencias asignadas a cada una de las autoridades.

#### **VII.27. APELACIÓN DEL SEÑOR ALFONSO PÉREZ PRECIADO**

Interviene en calidad de coadyuvante, reconocido dentro del proceso y mediante memorial radicado el 8 de septiembre de 2004 (fls. 6244 y 6445), por medio de apoderado judicial y posteriormente directamente, radicó escrito el 24 de febrero de 2005, y sustentó el recurso de apelación (fl. 7188), en los siguientes términos:

#### **VII. 27.1 CONSIDERACIONES PREVIAS**

##### **Pacto de cumplimiento:**

*Debe celebrarse entre todos los participantes dentro del proceso y no como se plantea en la sentencia, esto es, como un acuerdo entre la mayoría.*

##### **Resolución por la Sala Plena de la Corporación:**

*Solicitó la resolución de la acción por la Sala Plena de la Corporación en razón de su importancia jurídica y trascendencia social. (Art. 130 C.C.A.).*

Expediente No. 25000-23-27-000-2001-0479-01  
Acumulados Nos. 2000-0428, 2001-0122, 2001-0343  
Actor: GUSTAVO MOYA ÁNGEL Y OTROS  
Acción Popular

**Audiencia previa a fallo:**

*Solicitó señalar fecha y hora para hacer una exposición técnica de las objeciones a la propuesta presentada por el Distrito y aprobada por la Magistrada Ponente de instancia.*

**Carencia de interés económico para actuar:**

*No está incluido dentro de los beneficiarios de una sentencia condenatoria, ni representa nada distinto al interés profesional sobre el futuro ambiental del río Bogotá y de la región en general.*

**VII.27.2 RAZONES DE INCONFORMIDAD CON LA SENTENCIA DE CARÁCTER SUSTANCIAL**

El hecho de haber aprobado como Pacto de Cumplimiento la propuesta del Distrito Capital y/o de la Empresa de Acueducto y Alcantarillado de Bogotá, hace de la sentencia una decisión inane para la salvaguardia de los intereses colectivos, en contra de lo predicado por la misma sentencia, en términos populares constituye "un saludo a la bandera", razón por la cual solicita:

-Corregir los defectos de la sentencia del Tribunal Administrativo de Cundinamarca.

-Simplificar los procedimientos y redefinir las responsabilidades y tareas, acorde con las normas vigentes, a los cuales se refiere así:

**La estrategia del Distrito Capital:** de la lectura de la sentencia deduce el apelante que el D.C. maneja como estrategia la de "no aceptar responsabilidad en la contaminación del río", y en consecuencia pretende que se

Expediente No. 25000-23-27-000-2001-0479-01  
Acumulados Nos. 2000-0428, 2001-0122, 2001-0343  
Actor: GUSTAVO MOYA ÁNGEL Y OTROS  
Acción Popular

vincule a todos los municipios que vierten aguas residuales a sus ríos o a sus tributarios, así como a la multitud de empresas contaminadoras y a la comunidad en general.

Por ello consideró que se debe:

- Universalizar el problema, cuando el D.C. es responsable del 97% de la carga orgánica vertida al Río y el volumen de la población de Bogotá encierra el 88.3% de la población urbana de la sabana, el resto de municipios sabaneros sólo representan el 11.7%. La mayor parte de la industria se localiza en Bogotá y la que más contamina por la industria de bebidas, alimentos y química. Al pretender vincular a los pequeños municipios y comunidades de la cuenca media y baja les genera gasto de recursos para su defensa y desaliento en sus reclamaciones frente a los perjuicios derivados de la contaminación de la ciudad.
- No obra prueba de que el D.C. esté cumpliendo con el pago de la tasa retributiva, a la autoridad del Río en este caso, la CAR y de haberla pagado lo han hecho a través de la Empresa de Acueducto y Alcantarillado que es una empresa del Distrito Capital, razón por la que solicitó al Consejo de Estado requerir a la CAR constancia de si, a la fecha de la sentencia (25-08-2004), el Distrito capital de Bogotá y/o la Empresa de Acueducto y Alcantarillado de Bogotá EAAB tenían permiso de vertimiento para

Expediente No. 25000-23-27-000-2001-0479-01  
Acumulados Nos. 2000-0428, 2001-0122, 2001-0343  
Actor: GUSTAVO MOYA ÁNGEL Y OTROS  
Acción Popular

realizar las descargas de aguas residuales urbanas que hacen al río Bogotá.

- Crear confusión al pretender señalar que la contaminación vertida al río Bogotá es igual en los municipios de la cuenca y la proveniente de la ciudad capital.
- Mezclar causas con efectos, en cuanto dentro de su estrategia de defensa ha involucrado en el proceso, además de los municipios y contaminadores privados, a entidades como la CAR, el DAMA, la Gobernación de Cundinamarca, los Ministerios de Agricultura, Minas, Protección Social, Educación, Desarrollo y, de Ambiente, Vivienda y Desarrollo Territorial, Planeación Nacional, IDEAM, IGAC, entre otras muchas, para así poder diluir la responsabilidad y con miras a lograr que éstas entidades se sumen a un Pacto Común o presenten otras propuestas para que en caso de incumplimiento del Distrito Capital, puedan surgir otros actores. El Distrito Capital ya viene incumpliendo con sus obligaciones derivadas del Decreto 619 de 2000 (POT), según el cual ya se debería estar terminando la fase dos de la Planta de El Salitre, sin empezar siquiera (art. 60 núm. 1) y las obligaciones impuestas al distrito en la Resolución No. 817 de 1996 del Ministerio del Medio Ambiente, por medio de la cual se otorgó licencia ambiental para el sistema de tratamiento de sus aguas residuales.
- Pretermitir normas legales y procesos administrativos vigentes, el D.C. en su afán de

Expediente No. 25000-23-27-000-2001-0479-01  
Acumulados Nos. 2000-0428, 2001-0122, 2001-0343  
Actor: GUSTAVO MOYA ÁNGEL Y OTROS  
Acción Popular

firmar acuerdos que viabilizaran sus propuestas involucró a la autoridad ambiental regional (CAR) para que aprobara "*a priori*" un nuevo esquema para la descontaminación del Río (escrito visto a folios 3259 a 3262) de fecha 6 de agosto de 2003, con desconocimiento de las normas vigentes sobre la materia.

- El propio Tribunal Administrativo de Cundinamarca, al aprobar un nuevo programa de saneamiento, en reemplazo del contemplado en la licencia ambiental otorgada mediante Decreto 619 de 2000 del Alcalde Mayor, se convirtió en autoridad ambiental. En el mismo se modifican los tiempos de ejecución del programa, reduce la eficiencia del sistema de tratamiento, cambia la localización y características de las plantas y del sistema de tratamiento e incrementa considerablemente los costos. Lo que debió hacer la Corporación fue haber fijado plazos y condiciones para que el distrito y/o la EAAB presentaran las solicitudes y estudios encaminados a modificar el programa y la licencia, y para que el Ministerio del Medio Ambiente y/o la Car decidieran sobre esta solicitud en los términos de ley.
- Con este proceder se hace inmanejable el expediente.

#### **Las responsabilidades:**

El Tribunal Administrativo de Cundinamarca declaró como responsables por acción de la catástrofe ambiental del río Bogotá a los habitantes e industrias de la cuenca, cuando los individuos no son

Expediente No. 25000-23-27-000-2001-0479-01  
Acumulados Nos. 2000-0428, 2001-0122, 2001-0343  
Actor: GUSTAVO MOYA ÁNGEL Y OTROS  
Acción Popular

responsables por acción del mal manejo e inadecuada disposición de los residuos, sino las empresas de servicios públicos encargadas de su manejo y tratamiento.

Tampoco puede colocarse en el mismo saco a los responsables por omisión como lo dispone el Tribunal en el artículo 1º de la sentencia, al Distrito Capital - Empresa de Acueducto y Alcantarillado de Bogotá, que genera el 97% de la contaminación del Río y a entidades como el Ministerio de Minas y Energía, Ambiente Vivienda y Desarrollo Territorial, protección Social (INVIMA), Agricultura, IDEAM, CAR, Departamento de Cundinamarca y demás municipios de la cuenca del Río , cuando algunos de ellos también lo son por omisión, genera grietas que hacia el futuro, por donde se podrán diluir las responsabilidades reales frente al problema de la descontaminación.

El evidente deseo del Distrito Capital -EAAB de evadir su responsabilidad en torno al Río y la enorme confusión que logró crear en torno al problema en el Tribunal justifica la intervención del Consejo de Estado con el objeto de definir y delimitar la responsabilidad y obligaciones a su cargo como principal contaminador.

**Responsabilidad administrativa ambiental:**

El Ministerio de Ambiente, Vivienda y Desarrollo Territorial, se arrogó la competencia y otorgó la licencia ambiental para el sistema de tratamiento de aguas residuales de Bogotá, sobre la base del esquema de tres plantas escalonadas en el tiempo y en el espacio, iniciando con la planta de El Salitre. Como su legalidad no ha sido demandada, el Ministerio no puede alegar que no es responsable del problema y de los cambios que el distrito quiera introducir al programa de descontaminación.

La sentencia en estos términos, estimó, no es clara en definir la autoridad ambiental del Río y la distribución que hace de las funciones de la CAR, el DAMA, y el MAVDT, generando duplicidad de funciones y conflictos institucionales. Al ser el Río y su cuenca un ecosistema regional, su paso por la ciudad es apenas accidental razón por la cual su ordenamiento y

Expediente No. 25000-23-27-000-2001-0479-01  
 Acumulados Nos. 2000-0428, 2001-0122, 2001-0343  
 Actor: GUSTAVO MOYA ÁNGEL Y OTROS  
 Acción Popular

manejo deben trascender los límites político-administrativos.

Responsabilidad en la financiación de la descontaminación

Reiteró que esta responsabilidad está en cabeza del Distrito Capital y no de la CAR, entidad que no ha servido las obligaciones del Fondo Cuenta y al dar por terminado el contrato de concesión 015 de 1994 no se ejecutaron los recursos en la forma prevista.

**El programa de tratamiento aprobado:**

1.- Esquema de saneamiento basado en dos plantas: Salitre y Canoas, ésta última al final de la Sabana, muy cerca de Alicachín que trataría cerca de las  $\frac{3}{4}$  partes de las aguas residuales urbanas, el interceptor Engativá - Cortijo, el interceptor de aguas residuales entre el Río Fucha y la planta de Canoas, dos estaciones elevadoras (Tunjuelo y Canoas) y el proyecto de control de inundaciones para el río Bogotá. Se contempla igualmente la ampliación de la Planta de El Salitre para atender nuevos caudales desviados de la zona entre el aeropuerto y la calle 80, esquema que reemplazó al de las tres plantas escalonadas, cada una con una fase de tratamiento primario y otra de secundario. El control de vertimientos industriales forma parte del esquema de 1993 y quedó incluido en el nuevo.

2.- La sentencia del Tribunal, con fundamento en los estudios contratados por la EAAB, para demostrar que la nueva solución es más barata que la de 1993, compara cosas no comparables. El nuevo programa solo contempla tratamiento primario químicamente asistido (TPQA), mientras que el de 1993 incluía tratamiento secundario, por tanto tenía que ser más caro, rebajando de manera considerable la eficiencia del tratamiento con la propuesta aprobada.

| DESCRIPCION                       | ESQUEMA 1993   | ESQUEMA 2003                |
|-----------------------------------|----------------|-----------------------------|
| Número de plantas                 | 3              | 2                           |
| Interceptores a lo largo del Río. |                | 3 con estaciones elevadoras |
| Nivel de tratamiento              | Secundario     | Primario                    |
| Eficiencia final DBO5             | 20 mg/l (>90%) | 179,4 mg/l (40%)            |

Expediente No. 25000-23-27-000-2001-0479-01  
Acumulados Nos. 2000-0428, 2001-0122, 2001-0343  
Actor: GUSTAVO MOYA ÁNGEL Y OTROS  
Acción Popular

|                                                    |                |                                                |
|----------------------------------------------------|----------------|------------------------------------------------|
| Eficiencia final SS                                | 30 mg/l (>85%) | 107,2 mg/l (60%)                               |
| Caudal tratado disponible para reúso en la sabana. | 100%           | 20% (insuficiente para demanda futura sabana). |

Para el caso del río Bogotá señaló el apelante que lograr un efluente de menos de 30 mg/l solo con tratamiento primario o con TPQA, es imposible; si en realidad se pretende mostrar a la comunidad un efecto realmente notorio en la calidad del agua del Río es necesario que el programa mantenga la meta del tratamiento secundario en el corto plazo y el tratamiento terciario se justificaría para aquellas aguas que se vayan a utilizar para el consumo humano, razón por la cual solicitó que en esta instancia el Consejo de Estado **NO ACEPTÉ UNA EFICIENCIA MENOR A LA DEL TRATAMIENTO SECUNDARIO PARA EL PROGRAMA DE DESCONTAMINACIÓN DEL RIO BOGOTA**, tanto en las plantas municipales como en la del Distrito Capital.

El Tribunal al aceptar y aprobar el nuevo programa de descontaminación propuesto por el Distrito Capital-EAAB, no tuvo en cuenta lo dispuesto en el Decreto 1594/84 para vertimientos, por lo cual solicita se **CORRIJA EN LA SEGUNDA INSTANCIA ESTA OMISIÓN**.

Solicitó igualmente el impugnante que el Consejo de Estado ordene incrementar los caudales a desviar y tratar en la planta de El Salitre, para que entre su efluente y el caudal base del Río , se alcance por lo menos un caudal disponible de 13m<sup>3</sup>/s en promedio anual, para atender las necesidades actuales y futuras de la sabana centro occidental y el mantenimiento hidráulico del

Expediente No. 25000-23-27-000-2001-0479-01  
Acumulados Nos. 2000-0428, 2001-0122, 2001-0343  
Actor: GUSTAVO MOYA ÁNGEL Y OTROS  
Acción Popular

cauce; o, en todo caso, un caudal equivalente al promedio histórico multianual desviado por la EAAB de la cuenca alta y media del río Bogotá desde sus plantas de bombeo de Tibitoc, embalse de San Rafael, y embalses de Chisacá la Regadera, que es el caudal que debiera devolverse dentro de la propia cuenca del río Bogotá.

En relación con la validez institucional de la solución integral aceptada por el Tribunal, señala que las observaciones hechas por la CAR al nuevo programa para el río Bogotá, son importantes en cuanto no es lo mismo la operación del interceptor Torca-Salitre que la operación para el río Bogotá que deberá ser diseñado para transportar caudales pico del orden de  $40\text{m}^3/\text{s}$  de aguas negras cargadas de materiales en suspensión, además de que el río Bogotá corre por terrenos de arcilla y limo orgánico del valle aluvial del río de muy difíciles condiciones como suelo de soporte y de pendiente cercana a cero, a pesar de que el programa haya previsto la construcción de una estación elevadora en Tunjuelo, lo que en su criterio el costo de operación no ha sido suficientemente evaluado y el riesgo de contingencias por sedimentación puede resultar muy alto. Igualmente señala que no resulta viable la conducción de las aguas residuales a través de un gran interceptor enterrado.

En lo atinente a los costos y financiación del programa aprobado, las propuestas del Distrito Capital para el saneamiento del Río encierran dos inexactitudes:

Expediente No. 25000-23-27-000-2001-0479-01  
Acumulados Nos. 2000-0428, 2001-0122, 2001-0343  
Actor: GUSTAVO MOYA ÁNGEL Y OTROS  
Acción Popular

- Forman parte del actual plan de inversiones de la Empresa de Acueducto y Alcantarillado de Bogotá periodo 2012-2015, así como de la Ley 715.
- No tienen como destino las obras de tratamiento de las aguas residuales sino las del alcantarillado troncal, como son los interceptores los cuales deben construirse con o sin tratamiento. Los dineros destinados para la ampliación y operación de la Planta El Salitre provendrán de la sobretasa predial CAR obtenida en el Distrito, sin embargo el Distrito respecto de la Planta de Canoas a construirse entre 2014 y 2017, no ofrece inversión alguna y sólo anuncia que serán la Nación, el departamento y los municipios los que deberán contribuir con ello.

Significa lo anterior, a juicio del impugnante que el Distrito lo único que pretende es trasladar el problema de la financiación de la descontaminación a otros entes.

La sentencia no determinó el monto a financiar por cada una de las entidades, CAR y CRA y si se considera que los montos contemplados en la propuesta del Distrito por la Ley 715, tarifas alcantarillado, sobretasa CAR y tasas retributivas, resultan totalmente insuficientes ya que de acuerdo con lo previsto para la Planta de Canoas, su financiación está a cargo de la CAR, Sibaté y demás municipios que reciben transferencias del sector eléctrico, lo cual resulta totalmente inequitativo e insostenible.

En este orden de ideas, solicitó al Consejo de Estado se corrija la sentencia en el sentido de no obligar a los

Expediente No. 25000-23-27-000-2001-0479-01  
Acumulados Nos. 2000-0428, 2001-0122, 2001-0343  
Actor: GUSTAVO MOYA ÁNGEL Y OTROS  
Acción Popular

pequeños municipios de la Cuenca a costear con sus transferencias el proyecto de tratamiento de aguas residuales de la ciudad y a ordenar en cambio a la Empresa de Acueducto y Alcantarillado de Bogotá a financiar el proyecto con recursos de la ciudad (Ley 715) y de las demás empresas que se lucran del Río (EEB-EMGESA) e incluir los costos de inversión, operación y mantenimiento del sistema de tratamiento dentro de la tarifa de alcantarillado.

**La normatividad en torno al tratamiento de aguas residuales:**

El tratamiento de las aguas residuales, constituye una obligación legal exclusiva de la Empresa de Acueducto y Alcantarillado de Bogotá E.S.P. o en su defecto de la Alcaldía Mayor y no de las demás autoridades, de toda la región y de todos los colombianos.

**Plazos para el programa de descontaminación:**

Solicitó el apelante no aceptar las apelaciones que presente el Distrito Capital y la Empresa de Acueducto y Alcantarillado de Bogotá -EAAB-, relativas al plazo contemplado en la sentencia para tener terminado el programa en el año 2009, por ser quizá el mayor avance logrado en la acción popular, con miras a eliminar el impacto ambiental y económico de la contaminación en un término relativamente corto.

Expediente No. 25000-23-27-000-2001-0479-01  
Acumulados Nos. 2000-0428, 2001-0122, 2001-0343  
Actor: GUSTAVO MOYA ÁNGEL Y OTROS  
Acción Popular

**Solicitudes de la apelación:**

1.- Declarar responsable por acción de la contaminación generada por la ciudad capital sobre el río Bogotá a la Empresa de Acueducto y Alcantarillado de Bogotá -EAAB-, como entidad encargada de la recolección, transporte y disposición (vertimiento) de las aguas residuales de la ciudad, ya que tan sólo fue catalogada responsable en la sentencia por omisión y al mismo nivel de la CAR, el INVIMA, el IDEAM, el Ministerio de Agricultura, el Ministerio de Minas y Energía y otros (Sección 6.10.11 y art. 1 de la parte resolutive de la sentencia).

2.- Aclarar los puntos 6.9.10.11 y 6.9.11 de la sentencia y el artículo 3 literal j de la parte resolutive en el sentido de que corresponde a la Empresa de Acueducto y Alcantarillado de Bogotá desarrollar el tratamiento de las aguas residuales generadas por la ciudad de Bogotá, de conformidad con lo establecido la Ley 142 de 1994.

3.- Aclarar el artículo 3 literales a, j, e y d de la sentencia, y declarar que es la CAR la única autoridad ambiental del Río, de conformidad con lo establecido en la Ley 99 de 1993 y el Decreto 1753 de 1994.

4.- No aceptar que el nuevo tratamiento de las aguas residuales de la ciudad de Bogotá tenga una eficiencia menor que la esperada con el tratamiento secundario, como fue adoptado en el Decreto 619 de 2000 del Distrito Capital y como se contempló en la licencia ambiental para la planta de El Salitre, expedida por el Ministerio del Medio Ambiente.

Expediente No. 25000-23-27-000-2001-0479-01  
Acumulados Nos. 2000-0428, 2001-0122, 2001-0343  
Actor: GUSTAVO MOYA ÁNGEL Y OTROS  
Acción Popular

5.- Exigir que el caudal del río Bogotá aguas debajo de la desembocadura del río Salitre no sea inferior a  $13\text{m}^3/\text{s}$ , para poder atender la demanda actual y futura de agua para riego, uso industrial, urbano, mantenimiento hidráulico, para lo cual se requiere ampliar la capacidad de tratamiento de la planta de El Salitre, desviando los caudales previstos para tratar en la planta del Fucha.

6.- No obligar a Sibaté ni a los demás municipios de la Cuenca a sufragar con sus transferencias el proyecto del tratamiento de las aguas residuales de la ciudad, especialmente la planta de Canoas y ordenar a la Empresa de Acueducto de Bogotá financiar el proyecto con recursos de la ciudad, de la empresa y demás empresas que se lucran del Río , el Fondo Nacional de Regalías y otras fuentes y finalmente, con la inclusión de los costos de inversión, operación y mantenimiento del Sistema de Tratamiento dentro de la tarifa de alcantarillado.

7.- No aceptar la prórroga del plazo para la terminación y puesta en operación de las obras de tratamiento.

**Solicitud de prueba:**

Solicitar a la CAR constancia sobre si el Distrito Capital y/o la empresa de Acueducto y Alcantarillado de Bogotá tenían permiso de vertimiento de la CAR para realizar la descarga de aguas residuales urbanas al río Bogotá o a sus tributarios.

Expediente No. 25000-23-27-000-2001-0479-01  
Acumulados Nos. 2000-0428, 2001-0122, 2001-0343  
Actor: GUSTAVO MOYA ÁNGEL Y OTROS  
Acción Popular

## **VII.28. APELACIÓN DEL SEÑOR FABIO ROBERTO PÉREZ JAIMES (fl. 6249)**

En su calidad de perito ingeniero designado dentro del proceso de la referencia, interpuso recurso de apelación radicado el 8 de septiembre de 2004, con el objeto de que se revoque la sentencia en lo atinente al no reconocimiento de los honorarios por el dictamen pericial elaborado y presentado el 8 de octubre de 2001, según lo expresado en el numeral 6.17 de la parte motiva de la sentencia.

Fundamentó su solicitud en que una vez realizado el análisis de los estudios relacionados en el memorial de impugnación, efectuadas las consultas y visitas técnicas se procedió a dar respuesta al cuestionario presentado por el actor popular.

Agregó que no es cierto como lo afirma la sentencia, que los estudios y las asesorías datan de hace más de diez años, pues algunos son recientes y datan de 1999 hacia adelante. Manifiesta que el trabajo realizado fue serio e implicó estudio e investigación sobre el tema, así como visitas técnicas al Embalse del Muña, Sibaté y su entorno.

Tampoco consideró acertado que la Magistrada haya señalado que el dictamen fue presentado tardíamente por cuanto el mismo fue radicado el 8 de octubre de 2001, dentro del mismo año en que fue designado y posesionado según consta en el expediente.

Expediente No. 25000-23-27-000-2001-0479-01  
Acumulados Nos. 2000-0428, 2001-0122, 2001-0343  
Actor: GUSTAVO MOYA ÁNGEL Y OTROS  
Acción Popular

**VII.29.- APELACIÓN DEL SEÑOR GUSTAVO MOYA ANGEL  
(fls. 6263 y 7056)**

Por medio de apoderado judicial, interpuso recurso de apelación contra la sentencia de 25 de agosto de 2004, notificada por edicto el 1º de septiembre de 2004, escrito radicado el 8 de septiembre de 2004.

Como argumentos de la apelación invocó los siguientes:

1. Se revoque el numeral DECIMO PRIMERO de la parte resolutive de la sentencia, que dispuso fijar como incentivo para cada uno de los actores populares la suma de cincuenta salarios mínimos legales mensuales a cargo de las entidades que da cuenta la parte motiva de la sentencia y en su lugar se ordene el pago del incentivo en los términos previstos en el artículo 1005 del Código Civil, esto es, una suma que no baje de la décima, ni exceda de la tercera parte de lo que cueste la demolición o enmienda, o el resarcimiento del daño, por cuanto la acción popular fue promovida el 1º de octubre de 1992, cuando la norma de carácter sustancial era la del Código Civil y no la de la Ley 472 de 1998 y que el incentivo para el caso en particular corresponde a la Empresa de Energía de Bogotá, EMGESA S.A. y CODENSA S.A. quienes son solidariamente responsables y no a las entidades señaladas en el numeral 6.23.1 de la parte motiva de la sentencia.

Expediente No. 25000-23-27-000-2001-0479-01  
Acumulados Nos. 2000-0428, 2001-0122, 2001-0343  
Actor: GUSTAVO MOYA ÁNGEL Y OTROS  
Acción Popular

2. Se reforme el numeral PRIMERO de la parte resolutive de la sentencia y en su lugar se ordene declarar solidariamente responsables, por acción u omisión, a la Empresa de Energía de Bogotá, a EMGESA S.A. y a CODENSA S.A., como consecuencia de la escisión de que fue objeto la Empresa de Energía Eléctrica de Bogotá, inicialmente demandada.

#### **VII.30. APELACIÓN DE LA SEÑORA SARA MARIELA PARRAGA DE MOYA**

En calidad de sucesora procesal del demandante Gustavo Moya Ángel y por medio de apoderado judicial radicó memorial de apelación el 24 de febrero de 2005.

Fundamentos del recurso:

En primer término la impugnante pone de relieve que con la acción popular se pretende sanear y solucionar el daño ambiental generado por la Empresa de Energía Eléctrica de Bogotá al Municipio de Sibaté y zonas aledañas como consecuencia del bombeo y almacenamiento de las aguas negras contaminadas del río Bogotá en el Embalse del Muña, sin tratarlas ni descontaminarlas previamente a su depósito en dicho embalse.

Esta contaminación ha generado afectación al medio ambiente y a la salud de los habitantes del Municipio de Sibaté y las zonas aledañas.

Expediente No. 25000-23-27-000-2001-0479-01  
Acumulados Nos. 2000-0428, 2001-0122, 2001-0343  
Actor: GUSTAVO MOYA ÁNGEL Y OTROS  
Acción Popular

En estos términos, señaló que las causas que originan la contaminación del río Bogotá no dan lugar a eximir de responsabilidad a la Empresa de Energía Eléctrica de Bogotá, destacando que la acción popular se promovió para solucionar la problemática de contaminación del Río a la población de Sibaté y municipios aledaños. Reitera además que debe reconocerse el incentivo acorde con el artículo 1005 del Código Civil.

Agregó que la solución de sus pretensiones no busca la descontaminación del río Bogotá, sino la realización de las obras necesarias por parte de la EEEB, para que previamente a depositar y almacenar en el Embalse del Muña las aguas negras del río Bogotá, sean tratadas previamente, solución que la hace independiente de la que se adopte para descontaminar el río Bogotá.

La descontaminación del Embalse del Muña no puede estar condicionada a la descontaminación del río Bogotá, como equivocadamente pretende hacer ver la EEEB y erradamente lo ha interpretado el Tribunal de Cundinamarca.

Así entonces, lo que se requiere es la construcción de una planta de tratamiento de aguas como alternativa planteada en el dictamen pericial, en el cual se fija además un plazo máximo de tres años incluyendo las obras complementarias.

En segundo término la apelante solicitó que:

- Se revoque el numeral décimo de la sentencia en el sentido que se ordene dar aplicación al incentivo

Expediente No. 25000-23-27-000-2001-0479-01  
Acumulados Nos. 2000-0428, 2001-0122, 2001-0343  
Actor: GUSTAVO MOYA ÁNGEL Y OTROS  
Acción Popular

previsto en el inciso segundo del artículo 1005 del Código Civil, en razón a que la acción popular fue promovida el 1º de octubre de 1992, razón por la cual debe aplicarse la norma sustancial y no la procesal de la Ley 472 de 1998 y para que el mismo corra a cargo de la Empresa de Energía de Bogotá, EMGESA S.A. y CODENSA S.A, quienes son solidariamente responsables a raíz de la escisión y no a cargo de las entidades a que se refiere el numeral 6.23.1 de la parte motiva de la sentencia.

- Se reforme el numeral primero de la parte resolutive de la sentencia, que desestimó las excepciones de mérito propuestas por los demandados y declaró solidariamente responsables, por acción y por omisión a la Nación Ministerio de Minas y Energía, Ministerio de Vivienda, Ambiente y Desarrollo Territorial, al IDEAM, al INVIMA, al Ministerio de Agricultura, a la CAR, al Distrito Capital- DAMA- Empresa de Acueducto y Alcantarillado de Bogotá, Empresa de Energía Eléctrica, al departamento de Cundinamarca y a los municipios de la Cuenca Alta, media y baja del río Bogotá.

En su lugar pidió se ordene **declarar solidariamente responsables, por acción u omisión, a la Empresa de Energía de Bogotá -EMGESA S.A. y CODENSA S.A.,** respecto de los hechos en que se fundamentó la acción popular instaurada por Gustavo Moya Ángel, como consecuencia de los vertimientos y almacenamiento de las aguas negras.

Expediente No. 25000-23-27-000-2001-0479-01  
Acumulados Nos. 2000-0428, 2001-0122, 2001-0343  
Actor: GUSTAVO MOYA ÁNGEL Y OTROS  
Acción Popular

- En virtud del principio de congruencia procesal, la sentencia de primera instancia omitió analizar y pronunciarse sobre el tema referente al incentivo a la luz del artículo 1005 del Código Civil. Presenta una tabla en la cual consigna un "Resumen de costos aproximados de las propuestas recomendadas", que asciende a la suma de US\$347.9 millones de dólares, liquidados a 1º de octubre de 2001, a la tasa de \$2.339.40 moneda colombiana, valor que debe ser actualizado a la tasa representativa del mercado vigente.
- Finalmente anotó que como apoderado del actor popular ha realizado una actividad diligente durante más de doce (12) años que lleva el proceso, lo que hace equivocada la apreciación del Tribunal de instancia al advertir que,

*"(...) no ha sido la diligente actividad del apoderado lo que ha llevado a la toma de decisiones como las que se adoptan en esta sentencia, sino la ingente labor de esta Corporación para buscar un remedio en forma definitiva a la contaminación del Río (...)"*.

#### **VII.31. APELACIÓN DEL SEÑOR JORGE HUMBERTO GONZÁLEZ VILLANUEVA**

Actor en el proceso de la referencia, radicó escrito el 29 de septiembre de 2004 para interponer el recurso de

Expediente No. 25000-23-27-000-2001-0479-01  
Acumulados Nos. 2000-0428, 2001-0122, 2001-0343  
Actor: GUSTAVO MOYA ÁNGEL Y OTROS  
Acción Popular

apelación (fl. 6453) y el 24 de febrero de 2005 para sustentarlo (fl. 7031), en los siguientes términos:

- Solicitó tener en cuenta los argumentos planteados en el escrito del recurso de apelación presentado oportunamente dentro de la demanda acumulada 00-122, y en la cual se aprobó el pacto de cumplimiento presentado por EMGESA, según consta en el literal f) del numeral cuarto, razón por la cual se omite la condena en concreto para la recuperación de la represa del Muña y sus afluentes, olvidando que EMGESA S.A. toma las aguas del río Bogotá para verterlas directamente a la represa del Muña a través del Sistema de Bombeo que tiene instalado, sin ningún tipo de tratamiento primario, secundario y mucho menos terciario, origen y causa del grave daño ambiental actual de la represa del Muña.
- Dicha responsabilidad se encuentra debidamente acreditada en el dictamen pericial, que no fue objetado por las partes y que concluye que el responsable del daño ambiental que representa la represa por el vertimiento de las aguas del Río, trasvasamiento, en lo cual se fundamenta el Tribunal para exonerar de responsabilidad a la Empresa de Energía Eléctrica de Bogotá.
- Se revoque la sentencia complementaria en el numeral que dispuso la apropiación presupuestal de las accionadas para inversión de las obras a realizar en lugar de ordenar la constitución de la póliza que garantice el cumplimiento de los compromisos adquiridos por los accionados.

Expediente No. 25000-23-27-000-2001-0479-01  
Acumulados Nos. 2000-0428, 2001-0122, 2001-0343  
Actor: GUSTAVO MOYA ÁNGEL Y OTROS  
Acción Popular

Solicitó se denieguen las apelaciones de los demandados por cuanto son solidariamente responsables de la descontaminación del río Bogotá y sus afluentes y se convoque a una audiencia pública previa al fallo.

#### **VII.32. APELACIÓN DEL EL MUNICIPIO DE TOCANCIPÁ**

Por medio de apoderada judicial, sustentó el recurso de apelación en escrito radicado el 25 de febrero de 2005, (fl. 5880) señalando como motivos de inconformidad con la sentencia recurrida, los siguientes:

- El juez de instancia desconoció las propuestas planteadas en el "pacto de cumplimiento" presentado por el municipio, el cual demostró total disposición para el cumplimiento de cada de dichas propuestas. Particularmente la de adelantar las obras y proyectos en materia de descontaminación de las fuentes hídricas del municipio, manejo de residuos sólidos y preservación del ambiente con el concurso de la Car, la Gobernación y la Nación en el ámbito de sus competencias, sin embargo se profirió una sentencia ajena a dichas propuestas para actuar de manera oportuna, razón por la cual tampoco comparte la procedencia de la condena en costas.
- No se encuentra probada de forma clara y concreta la supuesta responsabilidad del Municipio de Tocancipá en la contaminación del río Bogotá ni en sus afluentes, ni tampoco en la violación de los derechos colectivos alegados en la demanda.

Expediente No. 25000-23-27-000-2001-0479-01  
Acumulados Nos. 2000-0428, 2001-0122, 2001-0343  
Actor: GUSTAVO MOYA ÁNGEL Y OTROS  
Acción Popular

No es posible declarar como ente contaminante al municipio pues el fallo tal como fue concebido, así como la responsabilidad solidaria que se impone con él hace un estudio genérico y no particular de las condiciones de cada caso concreto, ni de las acciones iniciadas y adelantadas por cada uno de los entes territoriales para concluir sin fundamento jurídico declarar una responsabilidad. Es más, los verdaderos contaminantes como EMGESA y la Empresa de Energía de Bogotá resultaron librados de cualquier responsabilidad frente a las pretensiones de la demanda, lo que constituye una contradicción palpable en la sentencia, ya que de una parte establece que tales entidades no son responsables ni por acción ni por omisión por la contaminación del río Bogotá y Embalse del Muña y posteriormente concluye que deberán asumir los costos de operación y mantenimiento de las obras del Plan de Vida Muña 2000, haciendo caso omiso a las pretensiones de la demanda.

- La condena impuesta desconoce la actividad desplegada por el Municipio de Tocancipá respecto de la recuperación y descontaminación del río Bogotá y sus afluentes. El Municipio de Tocancipá ha venido de tiempo atrás ejecutando numerosas acciones tendientes no sólo al tratamiento de la problemática ambiental del río Bogotá en sí misma considerada, sino al cúmulo de aspectos que la misma conlleva como la educación de la comunidad, manejo de residuos, restauración y conservación de predios que por su actividad pueden convertirse en agentes contaminantes, así como la realización de estudios y

Expediente No. 25000-23-27-000-2001-0479-01  
Acumulados Nos. 2000-0428, 2001-0122, 2001-0343  
Actor: GUSTAVO MOYA ÁNGEL Y OTROS  
Acción Popular

programación para la ejecución de obras en el mismo sentido.

Así la mayoría de ellos se encuentran en ejecución o ya han culminado, tales como la entrega de los acueductos de las veredas las Esmeraldas y Canavita; la puesta en marcha del Sistema de Tratamiento de aguas residuales y cumplimiento del plan de Manejo ambiental del matadero del Municipio de Tocancipá; diagnóstico segunda etapa acueducto vereda Canavita, la implementación de programas de mantenimiento preventivo y correctivo de la infraestructura de saneamiento básico, recuperación de la cantera de la provincia de Sabana Centro dentro de los límites del municipio; el desarrollo del Plan de Gestión Integral de residuos sólidos y el estudio del Plan Maestro de acueducto para el casco urbano y rural. Igualmente la realización de obras de inversión por valor de más de cinco mil millones de pesos, lo cual se acreditó debidamente en el proceso.

En estos términos solicitó se absuelva a la entidad territorial.

### **VII.33. APELACIÓN DEL MUNICIPIO DE MOSQUERA**

Interpuso el recurso de apelación a folio 5882 y lo sustentó en escrito presentado el 24 de febrero de 2005 (fl.7034) y con fundamento en los siguientes argumentos:

Expediente No. 25000-23-27-000-2001-0479-01  
Acumulados Nos. 2000-0428, 2001-0122, 2001-0343  
Actor: GUSTAVO MOYA ÁNGEL Y OTROS  
Acción Popular

No existe nexo causal entre las pretensiones planteadas y el accionar del Municipio de Mosquera frente al daño ambiental causado por el Embalse del Muña, no ha existido desidia administrativa que justifique la vinculación del municipio con el presunto daño ambiental causado al río Bogotá.

Por el contrario, el municipio ha coordinado con la Corporación Autónoma regional (CAR) la prevención mediante lagunas de oxidación o de tratamiento de aguas residuales para no provocar contaminación.

De otra parte, agregó que el deber de protección se ve menguado por la falta de presupuesto, pues son muchas las necesidades que aquejan el municipio para poderlas atender en su totalidad.

Finalmente anotó que la falta de control en las zonas de la ronda del Río y demás fuentes hídricas afectadas no puede conllevar a descalificar la actividad administrativa ejercida por el Municipio de Mosquera.

#### **VII.34. APELACIÓN DEL MUNICIPIO DE VILLAPINZÓN**

Por medio de apoderada judicial interpuso recurso de apelación en contra de la sentencia del Tribunal en escrito de 7 de septiembre de 2004, (fl.5920) formulando las siguientes peticiones:

Expediente No. 25000-23-27-000-2001-0479-01  
Acumulados Nos. 2000-0428, 2001-0122, 2001-0343  
Actor: GUSTAVO MOYA ÁNGEL Y OTROS  
Acción Popular

- Excluir de la declaración realizada en el artículo primero del fallo recurrido al Municipio de Villapinzón.

El fallo recurrido declaró solidariamente responsable al Municipio de Villapinzón, por la catástrofe del río y de la contaminación de los ríos y quebradas afluentes del primero, por omisión en el control de los vertimientos de las aguas residuales.

Afirmó, en primer término, que las funciones, competencias y atribuciones de las entidades públicas, son regladas y sujetas al principio de legalidad. Las funciones de los municipios en materia ambiental se encuentran descritas en la Ley 99 de 1993, en los artículos 65 y 83.

No existe omisión o responsabilidad de la entidad territorial ya que su actuación ha sido objeto de control y seguimiento se ha realizado desde dos puntos de vista. De una parte requiriendo a la CAR para que ejerza las acciones sancionatorias del caso y de otra, acatando o ejecutando las medidas sancionatorias o preventivas que ordena la CAR.

Agregó que en materia ambiental el régimen o procedimiento sancionatorio es de competencia exclusiva de la CAR, de tal manera que sólo en la medida en que la entidad territorial detecte alguna situación que atente contra los recursos naturales compulsa copias a dicha autoridad, a la cual corresponde adelantar el correspondiente procedimiento administrativo.

Expediente No. 25000-23-27-000-2001-0479-01  
Acumulados Nos. 2000-0428, 2001-0122, 2001-0343  
Actor: GUSTAVO MOYA ÁNGEL Y OTROS  
Acción Popular

Así las cosas, el fallo desconoce los principios de legalidad y seguridad jurídica, debido proceso y derecho de defensa al declarar responsable solidariamente por omisión en el control de vertimientos, circunstancia que no es cierta porque la entidad ha cumplido con las funciones asignadas y de acuerdo con las limitantes atribuidas por la misma.

Si las sanciones impuestas resultan inocuas o la efectividad de los controles ejercidos frente a la problemática ello no es atribuible al municipio sino a la CAR que dicho sea de paso ha proferido muy pocas decisiones frente a los vertimientos del río Bogotá durante los últimos años. Tampoco existe acto de delegación de la autoridad ambiental que le otorgue competencia adicional ambiental.

En estos términos apela la decisión, por las consecuencias que para el municipio trae de dicha declaración.

**Pacto de cumplimiento:**

- El municipio presentó un pacto de cumplimiento, (fls. 256 a 270 cdno. 1), el cual surtió los procedimientos y términos en la respectiva audiencia, dando lugar a su aprobación en el artículo segundo del fallo recurrido, con el objeto de salvaguardar los derechos colectivos de los actores. Dicho pacto abarca de manera amplia la problemática ambiental del municipio que afecta directamente la contaminación ambiental del río

Expediente No. 25000-23-27-000-2001-0479-01  
Acumulados Nos. 2000-0428, 2001-0122, 2001-0343  
Actor: GUSTAVO MOYA ÁNGEL Y OTROS  
Acción Popular

Bogotá, a corto plazo, esto es cinco (5) años: construcción del matadero municipal; saneamiento básico; mantenimiento del alcantarillado municipal, mantenimiento del relleno sanitario y radicación del proyecto de adquisición de predio, diseño y construcción de la planta de tratamiento, colectores y emisario final de aguas residuales para el Municipio de Villapinzón presentado ante la Gobernación de Cundinamarca y la Corporación Autónoma Regional -CAR-, a 15 de julio de 2003.

#### **Planta de tratamiento**

El municipio ha realizado diagnóstico que incluye: diseños preliminares y costos del proyecto por valor de \$950.000.000.00, el sólo costo proyectado de la PETAR, alcanza el 21% del presupuesto anual circunstancia que de por sí ya es bastante significativa. El fallo redujo el plazo a tres (3) años sin tener en cuenta las dificultades financieras en la realización del proyecto.

#### **Plan maestro de acueducto y alcantarillado**

Se ha elaborado el proyecto con los diseños preliminares, por un valor de doce mil quinientos millones (\$12.500.000.000), razón por la cual frente al presupuesto anual del municipio tendría que ejecutarse a mediano o largo plazo.

Expediente No. 25000-23-27-000-2001-0479-01  
Acumulados Nos. 2000-0428, 2001-0122, 2001-0343  
Actor: GUSTAVO MOYA ÁNGEL Y OTROS  
Acción Popular

### **Saneamiento básico**

Se han construido 30 unidades sanitarias y se ha elaborado e implementado proyecto de uso eficiente y control del agua.

### **Relleno sanitario**

El municipio se encuentra en proceso de adquisición del predio de propiedad de la CAR, para adelantar allí el proyecto sujeto a las condiciones ambientales y técnicas exigidas por la CAR.

### **Matadero Municipal**

En proceso de implementación y puesta en marcha con un costo de quinientos millones de pesos (\$500.000.000).

Sin embargo, en la sentencia con desconocimiento del debido proceso, en el artículo tercero de la parte resolutive se incluyeron órdenes adicionales al municipio que se salen de la órbita de competencia del municipio y del contexto real y ejecutable. Tal es el caso de la orden de la construcción de la planta de tratamiento de aguas residuales en un término inferior al previsto en el pacto presentado y aprobado máxime cuando el municipio carece de los recursos necesarios para el efecto.

Expediente No. 25000-23-27-000-2001-0479-01  
Acumulados Nos. 2000-0428, 2001-0122, 2001-0343  
Actor: GUSTAVO MOYA ÁNGEL Y OTROS  
Acción Popular

**Solicitudes:**

- Ampliar el plazo, con el objeto de que se corrija o ajuste el plazo para la ejecución de las obras incluidas en el Pacto de Cumplimiento.
- **Revocar en su integridad las obras y decisiones adicionales al pacto de cumplimiento ordenadas en el fallo recurrido.**

El Tribunal de instancia a juicio del apelante, de manera arbitraria e ilegal, dispuso en el artículo tercero una serie de medidas y obras adicionales, así:

- Propiciar y controlar los procesos de producción más limpia de las curtiembres de Villapinzón, con cargo a los recursos del municipio, y/o con la coordinación y cofinanciación del Departamento de Cundinamarca, la Beneficencia de Cundinamarca, de la Corporación Autónoma Regional de Cundinamarca, quien tendrá bajo su responsabilidad la dirección y el cumplimiento de esta orden, la que también con cargo a su presupuesto gestionará los programas de producción más limpia bajo -si es del caso- el sistema de COOPERACION DEL GREMIO DE LAS CURTIEMBRES, según las directrices trazadas en la parte motiva de esta sentencia.

En criterio del apelante esta redacción resulta confusa y dispersa, involucra diversas entidades de manera conjunta y no distingue las obligaciones de cada una, con

Expediente No. 25000-23-27-000-2001-0479-01  
Acumulados Nos. 2000-0428, 2001-0122, 2001-0343  
Actor: GUSTAVO MOYA ÁNGEL Y OTROS  
Acción Popular

desconocimiento de las funciones que la ley 99 de 1993 asignó a los municipios y a la CAR en esta materia.

- En cuanto a la orden de procurar para aquellos que se encuentren con necesidades básicas insatisfechas en atención a la precariedad de sus patrimonios ubicados dentro de la zona de la ronda del río Bogotá, para subsidiar planes de vivienda en un término que no podrá superar un año, contado a partir de la notificación del fallo y a quienes de acuerdo con su declaración de renta estén en capacidad de costear sus propias viviendas deberán ser desalojados de la zona de la ronda en un término máximo de seis (6) meses, el municipio manifiesta su total inconformidad y solicita sean revocadas con fundamento en:

**Naturaleza de la actividad:**

Las curtiembres son una actividad industrial con altos índices de rendimiento, el municipio no recibe ingresos tributarios por este concepto, luego resulta inexplicable la orden de la magistrada en el sentido de financiar con recursos propios o a través de otras entidades estatales, un subsidio de vivienda a un gremio que tiene intereses particulares. El municipio no cuenta con los recursos para acatar esta orden.

Los curtidores son los verdaderos agentes contaminantes, realizan una actividad que afecta el ambiente y en vez de ordenar el Tribunal a los

Expediente No. 25000-23-27-000-2001-0479-01  
Acumulados Nos. 2000-0428, 2001-0122, 2001-0343  
Actor: GUSTAVO MOYA ÁNGEL Y OTROS  
Acción Popular

curtidores el cumplimiento real y efectivo de las normas de vertimiento pretende premiarlos con subsidios de vivienda a cargo del municipio.

De acuerdo con el artículo 9º de la Ley 472 de 1998, las acciones populares proceden contra toda actuación u omisión de las autoridades públicas o de los particulares que violen o amenacen violar los derechos colectivos y la actividad del juez se concreta en una orden para evitar el daño contingente, hacer cesar el peligro , amenaza, vulneración o agravio de dichos derechos no para disponer subsidios de vivienda, con desconocimiento de los requisitos y presupuestos legales para su otorgamiento, en los términos de la Ley 388 de 1997 y la Ley 136 de 1994, presupuestos que en el presente caso no se cumplen.

Corresponde a la CAR adelantar el procedimiento sancionatorio previsto en el artículo 85 de la Ley 99 de 1993 en concordancia con el Decreto 1594 de 1984 y corresponde a los municipios la ejecución de las respectivas sanciones, luego la eficacia de la actuación administrativa corresponde a la CAR.

- Revocar el artículo décimo primero que fija el incentivo en lo que tiene que ver con el municipio, porque la entidad municipal no cuenta con los recursos y en caso de no acceder a esta solicitud se adecue de manera proporcional y razonable, acorde con las posibilidades presupuestales y las responsabilidades de cada entidad.

Expediente No. 25000-23-27-000-2001-0479-01  
Acumulados Nos. 2000-0428, 2001-0122, 2001-0343  
Actor: GUSTAVO MOYA ÁNGEL Y OTROS  
Acción Popular

### **VII.35. APELACIÓN DEL MUNICIPIO DE CAJICÁ**

Interpuso y sustentó el recurso en escrito radicado el 24 de febrero de 2005, (fl. 5936 y 6471) por medio de apoderado judicial, que declaró solidariamente responsables de la catástrofe ecológica del río Bogotá, entre otros al Municipio de Cajicá por acción, como Municipio de la Cuenca Alta del Bogotá.

Manifiesto su inconformidad con el fallo en los siguientes términos:

- El concepto de solidaridad ofrece dificultad frente a un asunto que involucra múltiples actores, más aún cuando la entidad territorial ha cumplido con los compromisos definidos en los acuerdos pactados en la oportunidad procesal correspondiente. En la actualidad Aguas de Cajicá tiene elaborado un proyecto de planta compacta para ser presentado en la Gobernación o en otras entidades para buscar recursos para ello.

En relación con los compromisos a mediano plazo, esto es la construcción de la planta de tratamiento de los sectores de La Virgen - Rincón Santo- Puerta del Sol- El Misterio, cuyo valor asciende a la suma de \$500.000.000 se ejecutará con cargo al presupuesto de los años 2004 y 2005, lo cual es imposible de cumplir porque no fue previsto en el presupuesto.

Expediente No. 25000-23-27-000-2001-0479-01  
Acumulados Nos. 2000-0428, 2001-0122, 2001-0343  
Actor: GUSTAVO MOYA ÁNGEL Y OTROS  
Acción Popular

Se anexa el plan de mejoramiento de la contraloría Departamental de Cundinamarca, en donde indica que se dio cumplimiento al art. 111 de la ley 99 de 1993, al asignar recursos para la compra de predios de interés ambiental.

En relación al pacto de cumplimiento, se iniciará la construcción de la planta de tratamiento de los sectores de la Virgen- Rincón Santo- Puerta del Sol- El Misterio, en dicha vigencia; de igual manera la reforestación de la cuenca del río Bogotá.

Sobre la orden de construcción de redes de alcantarillado, el municipio iniciará en la presente vigencia, el levantamiento y los cálculos para las redes de alcantarillado y planta de tratamiento con capacidad para atender a los usuarios de la zona industrial.

Solicita que se revoque el fallo, con fundamento en los argumentos aquí expuestos y en la contestación de la demanda, así como en el Pacto de Cumplimiento.

#### **VII.36. APELACIÓN EL MUNICIPIO DE ZIPAQUIRÁ**

Por medio de apoderado interpuso y sustentó el recurso de apelación (fl. 6056. 6460 y 7804), con base en los siguientes argumentos:

- Se revoque el ordinal segundo de la parte resolutive de la sentencia en cuanto el pacto de cumplimiento

Expediente No. 25000-23-27-000-2001-0479-01  
Acumulados Nos. 2000-0428, 2001-0122, 2001-0343  
Actor: GUSTAVO MOYA ÁNGEL Y OTROS  
Acción Popular

presuntamente aprobado con relación al Municipio de Zipaquirá carece de aprobación por las partes, no fue suscrito por el Alcalde de la localidad, sino por el Gerente de la Empresa de Acueducto, Alcantarillado y Aseo del municipio que es un ente descentralizado con autonomía administrativa. La función del juez es la de aprobar los pactos de cumplimiento, su celebración es atribución de las partes, sin embargo el juez modificó la propuesta sin el consentimiento de las partes, con lo cual se extralimitó en el ejercicio de sus funciones.

- Revocar el ordinal cuarto de la parte resolutive de la sentencia con relación a la construcción e implementación del plan maestro de acueducto y alcantarillado ya que se formuló una propuesta que sobrepasa el año 2009 y el proyecto exigiría un presupuesto con el cual el municipio no cuenta y lo llevaría a tener que renunciar al desarrollo de otros proyectos igualmente prioritarios que desde el punto de vista social resulta totalmente imposible. El Tribunal se abroga competencia para disponer de los recursos del municipio cuando esta función es exclusiva de la entidad administrativa a través de los planes de desarrollo.
- En cuanto a la obligación de construir la planta de tratamiento para las aguas residuales en un término que no sobrepase el 2009, de acuerdo con el pacto de cumplimiento dichas plantas podrán ser utilizadas en un 100% aproximadamente en los años 2012-2015 y siempre y cuando el municipio sea eximido del pago que se le impone para asumir la operación y mantenimiento del interceptor Canoas-Alicachín,

Expediente No. 25000-23-27-000-2001-0479-01  
Acumulados Nos. 2000-0428, 2001-0122, 2001-0343  
Actor: GUSTAVO MOYA ÁNGEL Y OTROS  
Acción Popular

despojándolo de las transferencias que vienen de EMGESA, hecho que hace más difícil la situación para el municipio. La sentencia no ha dado un tratamiento proporcional en materia de obligaciones a los municipios al no tener en cuenta la diferencia existente en materia de disposición de recursos, más aún cuando Zipaquirá cuenta con uno de los presupuestos más bajos de la región.

- Se violaron las normas procesales establecidas en la ley 472 de 1998. El fallador en primera instancia terminó el proceso con una sentencia que involucra parte de lo dispuesto en el artículo 27, pacto de cumplimiento y parte de lo contenido en el artículo 34, sentencia. Igualmente introdujo modificaciones al proyecto de pacto de cumplimiento, las cuales no fueron aprobadas por las partes.

### **VII.37. EL MUNICIPIO DE SIBATÉ**

Por medio de apoderado judicial presentó recurso de apelación en escrito radicado el 8 de septiembre de 2004 (fl. 6061), y como argumentos de disconformidad con la sentencia señaló los siguientes:

- Violación de normas constitucionales y legales contenidas en los artículos 366, 287 numeral 3º, 313 numerales 1º, 2º, 4º y 7º, 317, 339, 356, 366 en conexidad con los artículos 1, 2, 11, 49, 79 y 80 de la C.P.

Expediente No. 25000-23-27-000-2001-0479-01  
Acumulados Nos. 2000-0428, 2001-0122, 2001-0343  
Actor: GUSTAVO MOYA ÁNGEL Y OTROS  
Acción Popular

- Valoración errada de los hechos y de las pruebas. La sala da por demostrado que el Embalse del Muña es parte del río Bogotá, con lo cual desconoce que el río Bogotá es una formación de la naturaleza y el embalse es una obra construida por el hombre con una finalidad específica, generar energía, de manera que el Bogotá no pasa por el Municipio de Sibaté y por el contrario es la actividad empresarial de carácter comercial e industrial de la EEEB y EMGESA la que hace desviar las aguas del Río para trasvasarlas al Embalse del Muña, proceso que hoy sufre el municipio por la contaminación ambiental, afectando los derechos fundamentales a la vida y a la salud de la población, como consecuencia del bombeo de las contaminadas aguas del río Bogotá al Embalse del Muña.
- Advirtió que de conformidad con el dictamen pericial realizado por la CAR, dentro de la acción de tutela, en donde se conceptuó que las aguas que bombeaba la EEEB, del río de Bogotá al Embalse del Muña, estaban clasificadas como grado C, altamente contaminantes, restrictivas para uso humano, animal o vegetal y sin embargo no se ordenó la suspensión del bombeo de las aguas del río Bogotá al Embalse del Muña, con el argumento que ello daría lugar a un "apagón" en varios municipios de Cundinamarca.
- Objetó el pacto de cumplimiento presentado por EMGESA, LA EEEB, y la EAAB, en relación con el Embalse del Muña, porque el Tribunal tuvo en cuenta el estudio realizado por la Universidad de los

Expediente No. 25000-23-27-000-2001-0479-01  
Acumulados Nos. 2000-0428, 2001-0122, 2001-0343  
Actor: GUSTAVO MOYA ÁNGEL Y OTROS  
Acción Popular

Andes que realizó su análisis a partir de dos premisas erradas. La primera al considerar el Embalse del Muña como parte del sistema de tratamiento del río Bogotá, siendo falso porque el bombeo autorizado mediante la Resolución 0603 de 1997, tiene como clara y única finalidad la de generar energía y no la de tratar agua contaminada y al autorizar la realización en el área del Embalse del Muña una planta de tratamiento, es una decisión que compete adoptar exclusivamente al Municipio de Sibaté, pues por disposición constitucional (art. 313, núm. 7 C.P.) corresponde al Concejo Municipal de Sibaté reglamentar el uso del suelo en su jurisdicción y la segunda premisa errada es la de considerar ilimitada la capacidad de almacenamiento del Embalse del Muña.

- Advirtió que las medidas de mitigación ordenadas por el juez de tutela desde 1993 y las ordenadas por la CAR mediante la Resolución 1849 de 1999, conocida como Plan de Vida Muña 2000, no han disminuido el impacto ambiental generado por el bombeo del agua del Río al Embalse del Muña.
- Las leyes 142 de 1993 y 715 de 2001, señalan que es responsabilidad de los municipios la prestación de los servicios públicos de acueducto y alcantarillado, de tal manera que no se puede imponer al municipio la responsabilidad de tratar en su jurisdicción las aguas del río Bogotá que recibe las aguas servidas de Bogotá y otros

Expediente No. 25000-23-27-000-2001-0479-01  
Acumulados Nos. 2000-0428, 2001-0122, 2001-0343  
Actor: GUSTAVO MOYA ÁNGEL Y OTROS  
Acción Popular

municipios, cuando esta es obligación de la Administración Distrital la cual viene eludiendo.

**En estos términos solicitó:**

- Modificar la obligación que se impone en primera instancia de condenar al Municipio de Sibaté al pago de la construcción de la Planta de Tratamiento de Canoas, ya que el municipio está lejos de contaminar el Río y por el contrario recibe los desperdicios convirtiéndose en víctima de la contaminación ambiental por el bombeo realizado por EMGESA.
- No ser condenado de manera solidaria como lo dispuso la decisión de instancia, porque según la posición geográfica del municipio se debe considerar como perjudicado directo de la contaminación ambiental por parte de la EEEB, EMGESA y el Distrito Capital. Igualmente señala que se está creando una obligación de carácter económico que no le corresponde asumir al municipio, para la financiación de una obra de la cual no es directamente responsable, desconociendo la autonomía con la que cuenta el municipio para la inversión de los recursos, contrariando el artículo 317 de la Constitución Política.
- Revocar el numeral 5º literal d) de la sentencia, en especial por la condena impuesta al Municipio de destinar un porcentaje mayor para la operación y mantenimiento de la PTAR Canoas, la cual se ubica

Expediente No. 25000-23-27-000-2001-0479-01  
Acumulados Nos. 2000-0428, 2001-0122, 2001-0343  
Actor: GUSTAVO MOYA ÁNGEL Y OTROS  
Acción Popular

fuera de la jurisdicción del Municipio de Sibaté, con cargo a los recursos del municipio y que se declare que éste no ha incurrido ni por acción ni por omisión en la contaminación del Río Bogotá y sus afluentes.

Solicitó además como prueba fijar fecha y hora para que se lleve a cabo en el lugar donde se desarrollan los puntos de contaminación del río Bogotá y en especial en el lugar en donde se va a ubicar la planta de tratamiento de Canoas una inspección judicial en compañía de peritos, con el propósito de que se evalúe la situación geográfica de la planta, frente a la responsabilidad de contaminación del municipio, con fundamento en el artículo 361 numeral 3 del C.P.C.

#### **VII.38. APELACIÓN DEL MUNICIPIO DE FUNZA**

Mediante apoderado judicial radicó escrito (fls. 6211 y 6458) con el objeto de interponer recurso de apelación por las siguientes razones:

- En primer término advirtió que el Municipio de Funza no es causante de la contaminación de que es objeto la vertiente fluvial conocida con el nombre de río Bogotá, pero si es víctima de su afectación e impacto ambiental, por ello en la sentencia de primera instancia expresamente se dejó plasmado que la CAR responsabilizó de manera categórica al Distrito y a la EAAB sobre la contaminación del río Bogotá, razón por la cual se les debería adjudicar

Expediente No. 25000-23-27-000-2001-0479-01  
Acumulados Nos. 2000-0428, 2001-0122, 2001-0343  
Actor: GUSTAVO MOYA ÁNGEL Y OTROS  
Acción Popular

la mayor carga para la recuperación del río Bogotá y no al municipio que no tiene nada que ver con la carga contaminante.

- En estos términos, propuso se declare la inexistencia de la obligación a cargo del municipio.
- A pesar de que el pacto de cumplimiento fue aprobado por el Tribunal según consta a folio 314 de la sentencia lo fue a corto plazo "cinco años" tiempo imposible de cumplir por las cargas presupuestales que se encuentran alejadas de la realidad económica del municipio.

**En consecuencia solicitó:**

Revocar la sentencia de 25 de agosto de 2004, en lo relativo a las condenas impuestas al municipio, ya que nunca ha realizado conducta por omisión relacionadas con la contaminación del río Bogotá y el Embalse del Muña.

**VIII.39. APELACIÓN DEL EL MUNICIPIO DE GACHANCIPÁ**

Por medio de apoderada judicial, mediante escrito radicado el 24 de febrero de 2005 sustentó el recurso de apelación (fl. 7175), con fundamento en las siguientes consideraciones:

- Extralimitación del juez en la sentencia objeto de impugnación, por violación de los artículos 27 y 34 de la Ley 472 de 1998, que disponen la forma como puede terminar la acción popular: Pacto de Cumplimiento integral o Sentencia de fondo que

**Expediente No. 25000-23-27-000-2001-0479-01**  
**Acumulados Nos. 2000-0428, 2001-0122, 2001-0343**  
**Actor: GUSTAVO MOYA ÁNGEL Y OTROS**  
**Acción Popular**

decida sobre todas las pretensiones, sin embargo el Tribunal optó por combinar soluciones, fundadas en supuestos pactos de cumplimiento parciales al no incluir todos los aspectos de la litis ni involucrar a todas las partes; igual ocurre con la sentencia que tampoco se refiere a todas las pretensiones ni a todos los derechos violados.

- El Pacto de Cumplimiento aprobado con el Municipio de Gachancipá no fue aprobado por la Magistrada ni por las partes, tal como consta en el Acta de fecha 6 de octubre de 2003, por el contrario, fue rechazado expresamente por la Magistrada Ponente quien ordenó al municipio pronunciarse sobre el tema de control y vigilancia de la actividad industrial en la zona, particularmente sobre la explotación de canteras, luego la aprobación hecha en la sentencia es ilegal.
- Gachancipá nunca participó ni acordó consensualmente que iba a construir su plan maestro de acueducto y alcantarillado y las demás obras que menciona la parte resolutive de la sentencia.
- En cuanto al cambio o complementación del Plan Maestro de Acueducto y Alcantarillado que según la magistrada aprobó el municipio, aclara que no podía comprometerse a su ejecución por deficiencias presupuestales, lo que implicaría desconocimiento de la Ley 715 de 2001, el juez no puede sustituir a las partes o imponer soluciones en contra de su voluntad o cuyo contenido ellas desconozcan.
- Violación al principio de legalidad previsto en el artículo 230 de la Constitución Política. El incumplimiento del plan de desarrollo por parte del

Expediente No. 25000-23-27-000-2001-0479-01  
Acumulados Nos. 2000-0428, 2001-0122, 2001-0343  
Actor: GUSTAVO MOYA ÁNGEL Y OTROS  
Acción Popular

alcalde puede llevar a una revocatoria del mandato, y una sentencia judicial no puede desconocerla pues se estaría ordenando a la administración ejecutar acciones contrarias a la ley. Las condenas efectuadas por medio de las sentencias deben tener en cuenta la realidad presupuestal de cada entidad, y debe prever que existen rubros presupuestales con destinación específica que no pueden ser objeto de libre disposición por parte de la administración. Agrega que el alcance de la orden judicial dada en la sentencia debe estar limitada por el alcance y contenido de las funciones que legalmente corresponden a las entidades a las cuales se dirige la orden. El tema de los planes de desarrollo no puede ser contravenido por una sentencia judicial, así lo disponen los artículos 315 numeral 5º y 339 inciso segundo, la Ley 152 de 1994 y el Decreto 879 de 1998 y lo ha precisado la Corte Constitucional en sentencias C-152 de 1995 y C-538 del mismo año.

- Falta de pruebas y fundamento jurídico de la sentencia para imponer una condena al Municipio de Gachancipá puesto que no se le comprobó una acción u omisión que implique la vulneración de los derechos protegidos, por lo contrario todas sus actuaciones se han ajustado a las normas que regulan su campo de acción, as los planes de desarrollo y a su capacidad presupuestal. La sentencia en la parte resolutive se limita a condenar al municipio por omisión en el control de los vertimientos de las aguas residuales, lo cual no se encuentra acreditado en la parte motiva del fallo.

Expediente No. 25000-23-27-000-2001-0479-01  
Acumulados Nos. 2000-0428, 2001-0122, 2001-0343  
Actor: GUSTAVO MOYA ÁNGEL Y OTROS  
Acción Popular

- Inequidad de la condena, no se tuvo en cuenta la real dimensión del municipio y el verdadero índice de influencia que puede llegar a tener en cuanto a la contaminación del Río, Gachancipá no es un municipio con gran capacidad para contaminar debido a que su territorio es pequeño, no tiene industrias grandes, tiene pocos habitantes y cuenta con una planta de tratamiento moderna, sin embargo se le condenó en igual proporción a entidades territoriales que cuentan con gran capacidad de contaminación, con más habitantes y presupuesto muy superior.

Solicitó, revocar en su totalidad la sentencia de 25 de agosto de 2004, así como la complementaria de 16 de septiembre del mismo año y de manera subsidiaria, de accederse a la solicitud presupuestal, se revoquen los numerales 3º, 4º y 5º literal d) de la parte resolutive de la sentencia.

#### **VII.40. APELACIÓN DEL MUNICIPIO DE COTA**

Por medio de apoderada judicial en escrito radicado el 24 de febrero de 2005 sustentó el recurso de apelación interpuesto en contra de la sentencia de 25 de agosto de 2004 (ver folios 6243, 6470 y 7043), por las siguientes razones:

- El Tribunal Administrativo de Cundinamarca, aprobó los pactos de cumplimiento presentados por cada uno de los entes demandados y adicionó la sentencia con

Expediente No. 25000-23-27-000-2001-0479-01  
Acumulados Nos. 2000-0428, 2001-0122, 2001-0343  
Actor: GUSTAVO MOYA ÁNGEL Y OTROS  
Acción Popular

propuestas que nunca se mencionaron en el pacto de cumplimiento por parte del Municipio de Cota, como la de que a partir del año 2009 las transferencias del sector eléctrico deben destinarse para la cuenca hidrográfica y el área de influencia del Río y del embalse, expresamente para la operación de mantenimiento de la Planta de Tratamiento de Aguas Residuales Canoas, gasto que advierte lo debe asumir EMGESA S.A. ya que es la empresa que deriva sus utilidades de la prestación del servicio de energía eléctrica, adoptada con fundamento en que los municipios no han utilizado en debida forma las transferencias del sector eléctrico.

Ello implica que la empresa EMGESA dejaría de transferir a los municipios el porcentaje previsto en la ley para que sea destinado a la operación y mantenimiento de la PTAR Canoas, contrariando no solo la ley sino además olvidando que los municipios cuentan con un presupuesto reducido para implementar los programas de protección al medio ambiente y a la defensa de la cuenca hídrica.

Destacó que hay que tener en cuenta que el municipio no posee industrias que contaminen directamente por vertimientos, luego la única incidencia que tiene el municipio es por el vertimiento de aguas residuales las cuales son tratadas por la planta con la que cuenta el municipio y razón por la cual estas aguas llegan tratadas al río Bogotá.

- El segundo punto es la condena en costas a favor de los accionantes que incluye honorarios de abogados,

Expediente No. 25000-23-27-000-2001-0479-01  
Acumulados Nos. 2000-0428, 2001-0122, 2001-0343  
Actor: GUSTAVO MOYA ÁNGEL Y OTROS  
Acción Popular

los gastos que se encuentren debidamente probados, los cuales se liquidarán una vez quede en firme la sentencia. Al haberse aprobado un pacto de cumplimiento no hay lugar a la condena en costas pretendida.

De conformidad con el artículo 171 del C.C.A. la condena en costas tiene un carácter subjetivo, es decir que sólo opera la responsabilidad cuando existe una conducta reprochable atribuible a la parte vencida y la remisión al Código de Procedimiento Civil se entiende hecha para regular los aspectos relativos a la condena en costas no previstos en el Código Contencioso Administrativo, tales como la oportunidad para proferirla, las normas que se aplican para su liquidación, los recursos procedentes y todos los asuntos a que se refieren los artículos 392 y 393 del C. de P.C., su aplicación entonces es de carácter supletivo, sólo en ausencia de norma expresa.

En consecuencia, solicitó que la condena sea equitativa frente a los demás municipios que generan mayor contaminación del río Bogotá.

#### **VII.41. APELACIÓN DEL MUNICIPIO DE CHÍA**

Por medio de apoderado judicial, interpuso recurso de apelación contra la sentencia de 25 de agosto de 2004 (folio 6246) con el objeto de que se modifiquen los numerales primero, segundo, tercero, cuarto, quinto, décimo y décimo primero, por las siguientes razones:

Expediente No. 25000-23-27-000-2001-0479-01  
Acumulados Nos. 2000-0428, 2001-0122, 2001-0343  
Actor: GUSTAVO MOYA ÁNGEL Y OTROS  
Acción Popular

- Imponer a la Corporación Autónoma Regional de Cundinamarca -CAR, mayores cargas económicas pues ella recibe por concepto de Porcentaje Ambiental de los Gravámenes a la propiedad privada previsto en el artículo 44 de la Ley 99 de 1993 y la Ley 44 de 1990 que desarrolla el inciso segundo del artículo 317 de la Constitución Política y con destino a la protección del medio ambiente y los recursos naturales renovables y no se le imponga al municipio la obligación de incluir en su presupuesto obligaciones que no le corresponden.
- Precisar en la parte resolutive de la sentencia que para el ordenamiento territorial del río Bogotá, tanto la CAR, como los municipios accionados y las demás entidades supramunicipales son igualmente corresponsables y, por lo tanto, deben participar de manera activa y directa en tanto, el municipio carece de la información, manejo y demás elementos exigidos para la obligación impuesta.
- No se vincularon al proceso las personas naturales y jurídicas que efectúan vertimientos contaminantes industriales y no industriales.
- La cofinanciación establecida en el fallo resulta difusa en cuanto no determina el grado de responsabilidad de cada entidad accionada que en últimas resultará impuesta por la entidad de mayor jerarquía, sin que sea posible prorratearse porque no todas las entidades involucradas tienen un mismo grado de responsabilidad.
- La recuperación ambiental, incluyendo viviendas involucra sumas millonarias que el ente territorial no alcanzaría a sufragar sino a muy largo plazo.

Expediente No. 25000-23-27-000-2001-0479-01  
Acumulados Nos. 2000-0428, 2001-0122, 2001-0343  
Actor: GUSTAVO MOYA ÁNGEL Y OTROS  
Acción Popular

- No corresponde al fallo señalar en detrimento de los municipios, una menor distribución de los recursos del Fondo Nacional de Regalías.
- El término fijado para la reparación de las redes pluviales de las redes de alcantarillado es muy breve pues como mínimo se requiere de doce (12) años. Igualmente precisa que le corresponde a la firma HYDROS CHIA S. en C., A. responder por dicha obligación, y en modo alguno al municipio, circunstancia que fue precisada en el proceso. El mismo tratamiento se solicita para la construcción de las PLANTAS DE TRATAMIENTO, pues el término otorgado resulta insuficiente y se requiere ser prorrogado hasta el 2015, pues se trata de un megaproyecto.

#### **VII.42. APELACIÓN DEL MUNICIPIO DE SOACHA**

Representado por apoderado judicial, interpuso recurso de apelación y solicitó se modifique el pacto de cumplimiento propuesto, en escrito radicado el 4 de septiembre de 2004, (folio 6254) en los siguientes términos:

- El *a-quó* impone al Municipio de Soacha obligaciones que van más allá de la capacidad de inversión del municipio, debido a limitaciones presupuestales, obligaciones que no fueron concertadas ni controvertidas con el municipio. Si bien es cierto el municipio presentó un proyecto de Pacto de cumplimiento que fue aprobado hasta allí llega la

Expediente No. 25000-23-27-000-2001-0479-01  
Acumulados Nos. 2000-0428, 2001-0122, 2001-0343  
Actor: GUSTAVO MOYA ÁNGEL Y OTROS  
Acción Popular

responsabilidad del municipio. El Tribunal no podía aprobar el pacto e imponer obligaciones adicionales, al crear obligaciones por fuera de la capacidad financiera del municipio y obligando a efectuar inversiones como la construcción de la PTAR Canoas que de suyo corresponde a la Empresa de Acueducto y Alcantarillado de Bogotá y a la Corporación Autónoma Regional de Cundinamarca y sin su conocimiento, porque desnaturalizaría la figura del Pacto de Cumplimiento. En estos términos considera que el *a quo* excedió su competencia.

- En estos términos solicitó se declare que el municipio sólo es responsable de las obligaciones propuestas y aprobadas en el Pacto de Cumplimiento y que cualquiera otra obligación por fuera del mismo no tiene efectos jurídicos en cuanto no fueron controvertidas por el municipio y por lo tanto, están incursas en causal de nulidad por violación al debido proceso.
- Revocar la sentencia de 25 de agosto de 2004, respecto de:
- Las obligaciones adicionales e inconsultas y dejar vigente las obligaciones contenidas en el pacto, ya que el municipio presentó un pacto de cumplimiento el cual fue aprobado en la sentencia de primera instancia, teniendo en cuenta la solicitud de modificación de las fechas de cumplimiento.
- El incentivo fijado a los actores, en cuanto no se ajusta al equilibrio económico y la equidad, en su defecto se rebaje a un valor acorde con la equidad.

Expediente No. 25000-23-27-000-2001-0479-01  
Acumulados Nos. 2000-0428, 2001-0122, 2001-0343  
Actor: GUSTAVO MOYA ÁNGEL Y OTROS  
Acción Popular

- Modificar el pacto de cumplimiento, respecto de los años en los cuales se efectuaran los desembolsos ya que a la presentación de la petición, el pacto aún no se había aprobado y porque la EAAB, no había iniciado la correspondiente licitación y para el municipio resulta imposible ejecutar las obras para el 2004 por un valor de 972 millones de pesos. Propone efectuar los desembolsos por la suma de \$972.000.000 en los años 2005, 2006 y 2007.

#### **VII.43. EL MUNICIPIO DE MADRID Y LA EMPRESA DE ACUEDUCTO, ALCANTARILLADO Y ASEO DE MADRID**

Por medio de apoderado judicial (folio 6257) presentaron recurso de apelación en escrito radicado el 8 de septiembre de 2004, reiterando en primer lugar los alegatos de conclusión presentados en la instancia y con fundamento en las siguientes consideraciones:

- El Municipio de Madrid no es ribereño del río Bogotá por tal razón no se le debió notificar de la acción popular 01-479 ya que la notificación iba dirigida a los representantes legales de los municipios circundantes al río Bogotá y el Municipio de Madrid no hace parte de ellos. Por lo tanto se solicita se excluya de la responsabilidad de la contaminación del río Bogotá al municipio.
- No obstante lo anterior, el Río Subachoque como fuente hídrica en un 21% del Municipio de Madrid, que desemboca en el Río Balsillas y éste a su vez en el río Bogotá, el municipio ha realizado algunas acciones tendientes a la recuperación de la fuente

Expediente No. 25000-23-27-000-2001-0479-01  
Acumulados Nos. 2000-0428, 2001-0122, 2001-0343  
Actor: GUSTAVO MOYA ÁNGEL Y OTROS  
Acción Popular

hídrica pero tales esfuerzos resultan inocuos si no se cuenta con el concurso de los otros organismos del orden nacional, departamental y municipal.

- Cuando el Río Subachoque pasa por el Municipio de Madrid ya viene contaminado, de esta forma los esfuerzos que vienen realizando las diferentes administraciones resultan inútiles.
- Solicitó en estos términos que, la descontaminación no solo del río Bogotá sino de todas las fuentes hídricas constituya una prioridad de los planes de desarrollo y sea incluida dentro de los presupuestos de las entidades encargadas del medio ambiente, de todos los órdenes. Agrega que parte de los recursos de los municipios, como el impuesto predial se cede a la CAR, entidad que debe reinvertirlos en programas ambientales dirigidos a la descontaminación de las fuentes hídricas.
- Que se tengan en cuenta las siguientes situaciones que no permiten el cumplimiento de lo fallado:
- Controlar los vertimientos de aguas residuales e implementar programas de producción más limpia para las industrias del municipio, frente a esta obligación le corresponde a la CAR destinar recursos humanos y económicos.
- En cuanto a la obligación de diseñar, construir y ejecutar los planes maestros de acueducto y alcantarillado, el municipio ya tiene los diseños y está calculada la obra por \$20.000.000.000, valor que supera el presupuesto anual (\$1.181.537.000 asignado para agua potable y saneamiento básico para el año 2004). Por lo anterior se solicita se excluya al Municipio de la contaminación del río Bogotá y

Expediente No. 25000-23-27-000-2001-0479-01  
Acumulados Nos. 2000-0428, 2001-0122, 2001-0343  
Actor: GUSTAVO MOYA ÁNGEL Y OTROS  
Acción Popular

que el plazo ordenado en primera instancia se prorrogue por 20 años más y se ajuste al presupuesto.

- Respecto a la obligación de asumir los costos de la operación y mantenimiento de las plantas de tratamiento de aguas residuales, no se puede asumir hasta que la CAR las deje en las condiciones técnicas requeridas, las optimice y las entregue en pleno funcionamiento. Por lo tanto se solicita se ordene a la CAR tomar las medidas pertinentes y condicionar el fallo al pleno funcionamiento de las PTAR.
- Que se exonere al Municipio de la obligación de hacer aportes para la operación de la planta de tratamiento de aguas residuales que está proyectada construir por el Distrito Capital en el Municipio de Soacha, ya que el municipio no es causante de dicha contaminación, corresponde a las empresas del distrito Capital desembolsar tales recursos.
- Con relación al aporte para la operación y mantenimiento del Embalse del Muña, el municipio no es beneficiario de esta obra y no cuenta con los recursos para beneficiar a otros entes territoriales, lo que además daría lugar a un desvío de los recursos estatales.

#### **VII.44. APELACIÓN DEL MUNICIPIO DE TABIO**

Por medio de apoderado judicial interpuso recurso de apelación, en el efecto suspensivo contra la sentencia de 25 de agosto de 2004, (fl. 6280), solicitando se revoque

Expediente No. 25000-23-27-000-2001-0479-01  
Acumulados Nos. 2000-0428, 2001-0122, 2001-0343  
Actor: GUSTAVO MOYA ÁNGEL Y OTROS  
Acción Popular

la sentencia de primera instancia conforme a lo siguiente:

- En la jurisdicción del municipio no existen vertimientos de aguas residuales sobre el río Bogotá y la represa del Muña, por lo tanto, no es necesario implementar programas de producción más limpia para las industrias.
- No existen productos agrícolas, ganados y pecuarios que se estén alimentando con aguas del río Bogotá o de la represa del Muña.
- Se realiza control de los vertimientos de aguas domesticas en la localidad con el direccionamiento de la secretaria de asuntos ambientales y recursos agropecuarios.
- En el POT del municipio se contempló el manejo ambiental de la jurisdicción.
- Las últimas administraciones municipales han estado muy atentas al mejoramiento de las instalaciones del matadero municipal, acorde con los lineamientos fijados por las autoridades ambientales.
- El municipio continuamente realiza programas de recuperación de las fuentes hídricas.
- El municipio no pertenece a la cuenca alta del río Bogotá, por lo tanto no se le debe imponer la obligación de diseñar, construir y ejecutar los planes maestros de acueducto y alcantarillado en un plazo no mayor al 2009.
- Al momento de emitir el fallo el Tribunal no tuvo en cuenta el escaso presupuesto municipal que impide cumplir a satisfacción las necesidades básicas del

Expediente No. 25000-23-27-000-2001-0479-01  
Acumulados Nos. 2000-0428, 2001-0122, 2001-0343  
Actor: GUSTAVO MOYA ÁNGEL Y OTROS  
Acción Popular

municipio y realizar las obras tendientes a la separación de las redes de alcantarillado pluvial de las de alcantarillado de aguas negras.

- El Consejo de Estado debe analizar que los habitantes del municipio, especialmente el sector de la Vereda Paloverde Chicú, se encuentran gravemente afectados por el estado actual de la planta de tratamiento de aguas residuales que maneja la CAR y la que hace muchos años no se le hace el tratamiento adecuado.
- El municipio no comparte el hecho de que por recibir algunos recursos de EMGESA deba estar obligado a realizar aportes para la operación de la planta de tratamiento de aguas residuales que está proyectado construir en el Municipio de Soacha, PTAR CANOAS, cuando es obligación del Distrito Capital asumir la totalidad de dichos costos, de conformidad con lo establecido en la Ley de Servicios Públicos.
- Tampoco el municipio está de acuerdo con la obligación de aportar para la operación y mantenimiento de las PTAR, que las empresas de E.E.E.B y EMGESA están proyectando construir en el Embalse del Muña.

#### **VII.45. APELACIÓN DEL MUNICIPIO DE SUESCA**

Por medio de apoderada judicial interpuso recurso de apelación en contra de la sentencia de 25 de agosto de 2004, en cuanto no comparte las decisiones que allí se tomaron y que se relacionan de manera directa e indirecta

Expediente No. 25000-23-27-000-2001-0479-01  
Acumulados Nos. 2000-0428, 2001-0122, 2001-0343  
Actor: GUSTAVO MOYA ÁNGEL Y OTROS  
Acción Popular

con el Municipio de mandado, pues vulnera sus derechos y el presupuesto con que cuenta.

Sustentó el recurso en los siguientes términos:

- Inexistencia del daño ambiental por parte del municipio, porque no vierte las aguas residuales directamente al río Bogotá sin previo tratamiento pues cuenta con una laguna de aguas residuales a la cual se vierten tales desechos, derivado de un acuerdo interinstitucional celebrado entre el municipio y la CAR para evitar verter al Río elementos contaminantes, razón por la cual el municipio no tiene ninguna obligación de contribuir a los gastos de diseño y construcción de futuras plantas de tratamiento ya que es política del municipio evitar los medios de contaminación de la región especialmente río Bogotá. Para comprobar lo anterior, como medida de protección se cerró el matadero municipal.
- Responsabilidad de terceros, porque cuando el Río pasa por el municipio ya llega contaminado, afectando a campesinos y pobladores de la región. Se debe tener en cuenta que los agentes más contaminantes del río Bogotá son el Distrito Capital y el Municipio de Soacha, quienes por su inmensa población y por falta de verdaderas plantas de tratamiento de aguas residuales simplemente vierten sus aguas negras al afluente.
- No existe responsabilidad del Municipio de Suesca en los hechos motivo de este proceso dado que la contaminación alegada es causada por terceros cuya

Expediente No. 25000-23-27-000-2001-0479-01  
Acumulados Nos. 2000-0428, 2001-0122, 2001-0343  
Actor: GUSTAVO MOYA ÁNGEL Y OTROS  
Acción Popular

existencia y realidad suministra claramente el proceso y de afectar la salubridad del Río su grado de participación es ínfimo frente a los demás responsables.

- El municipio no está recibiendo ningún beneficio de las aguas del Río debido a que no las utiliza para su acueducto de consumo humano, ni para generar energía, tampoco para algún tipo de industria. Por el contrario, son explotadas por grandes empresas como EMUELA y la EEEB para la producción de energía. Luego las plantas de tratamiento que se están ordenando deberán ser construidas en Bogotá, el Muña o Soacha y a sus expensas, por ser beneficiarios directos de las aguas.
- En cuanto a la contribución para la construcción de las plantas de tratamiento a su juicio resulta injusta, violatoria de los derechos fundamentales de sus habitantes y porque minimiza el presupuesto del municipio.

En estos términos solicitó:

Revocar la sentencia en lo relacionado con la orden de participación económica del presupuesto para la construcción de las plantas de tratamiento, toda vez que el municipio no es agente contaminante del río Bogotá, no explota sus aguas y no se beneficia de forma directa de él, como sí las grandes empresas del sector privado.

Expediente No. 25000-23-27-000-2001-0479-01  
Acumulados Nos. 2000-0428, 2001-0122, 2001-0343  
Actor: GUSTAVO MOYA ÁNGEL Y OTROS  
Acción Popular

#### VII.46. APELACIÓN DEL MUNICIPIO DE SOPÓ

Por medio de apoderado judicial reconocido en el proceso, interpuso recurso de apelación en escrito radicado el 4 de septiembre de 2004 y sustentado en escrito presentado el 24 de febrero de 2005 (fls. 6471 y 7038), en los siguientes términos:

- La parte atacada del fallo dispone la condena en costas a favor de los accionantes, *"las cuales se liquidarán en su oportunidad y cargo por partes iguales de todos los entes demandados con excepción de EMCOCABLES S.A., de acuerdo con lo señalado en las motivaciones. Así mismo, para garantizar el cumplimiento de esta sentencia se dispone que las entidades públicas demandadas realicen las correspondientes apropiaciones dentro de sus respectivos presupuestos y en cuanto a las realizadas en la presente vigencia procédase en la forma dispuesta en la ley a realizar la correspondiente reserva con el fin de que las obras que no se hubiesen construido no pasen a vigencias expiradas y se cancele el respectivo gasto"*.

Al respecto la entidad demandada manifestó su inconformidad con la sentencia así:

- En el litigio no se incurrió en gastos procesales para que se convirtieran en costas; las agencias en derecho representan una contraprestación por los

Expediente No. 25000-23-27-000-2001-0479-01  
Acumulados Nos. 2000-0428, 2001-0122, 2001-0343  
Actor: GUSTAVO MOYA ÁNGEL Y OTROS  
Acción Popular

gastos en que la parte triunfante incurrió para ejercer la defensa judicial de sus intereses.

- En el expediente no se acreditó el pago de servicios profesionales de abogado y por lo tanto no se incurrió en gastos de honorarios.
- La Nación, los Departamentos y los Municipios son personas de derecho público, para que estas puedan reconocer las expensas requeridas para surtir el proceso, debieron ser acreditadas por los accionantes, cosa que no se hizo.
- Se debe exonerar al Municipio de Sopó del pago de las costas por ser persona de derecho público, que actúa no en defensa de intereses privados, sino por los intereses de la comunidad en desarrollo del artículo 1º de la Constitución Política.
- Al disponer la aprobación del pacto de cumplimiento (fls. 308 a 309), no hay lugar a condena de costas, ya que la audiencia especial de pacto de cumplimiento prevista en el artículo 27 de la Ley 472 de 1998, equivale a una conciliación, y por lo tanto, no procede la condena en costas.

En la sustentación del recurso agregó que el Municipio de Sopó no es tributario directo del río Bogotá, éste ingresa a sus inmediaciones, aguas debajo de la planta de Tibitoc, razón por la cual no puede endilgársele responsabilidad directa en su contaminación.

Los vertimientos del municipio vienen siendo tratados mediante sistemas anaeróbicos en laguna de oxidación que ha venido siendo operada por la CAR, planta que se halla

Expediente No. 25000-23-27-000-2001-0479-01  
Acumulados Nos. 2000-0428, 2001-0122, 2001-0343  
Actor: GUSTAVO MOYA ÁNGEL Y OTROS  
Acción Popular

en funcionamiento desde 1994, por virtud del Convenio Interinstitucional 147 de 1991.

El desarrollo del Plan Maestro de Alcantarillado enmarcado dentro del Plan Básico de Ordenamiento Territorial aprobado por la CAR, constituye la base relevante para la presentación del proyecto de pacto de cumplimiento dentro de la acción popular.

Si hubo aprobación del pacto de cumplimiento presentado por el municipio, no se entiende cómo se imponen obligaciones a los municipios que reciben transferencias de EMGESA o en general, del sector eléctrico para descontar el que les corresponde aportar para la operación y mantenimiento de la PTAR Canoas en la forma como se contempla en la parte motiva del fallo.

Estos recursos por mandato del artículo 45 de la Ley 99 de 1993, sólo podrán ser utilizados por los municipios en las obras previstas en el Plan de Desarrollo Municipal con prioridad de los proyectos de saneamiento básico y mejoramiento ambiental, razón por la cual dicha orden judicial debe ser revocada, así como aquellos acápites de la sentencia que imponen obligaciones y compromisos adicionales no contemplados en los proyectos presentados pues su aprobación fue pura y simple por parte de la magistrada ponente.

Por último señaló que el reconocimiento de los incentivos a favor de los accionantes decretado en el numeral décimo primero de la sentencia principal, no corresponde a la filosofía, cuantía y fines de los mismos, razón por la

Expediente No. 25000-23-27-000-2001-0479-01  
Acumulados Nos. 2000-0428, 2001-0122, 2001-0343  
Actor: GUSTAVO MOYA ÁNGEL Y OTROS  
Acción Popular

cual también deben ser revocados y circunscribirse al marco dispuesto por la Ley 472 de 1998, artículo 39 y en proporción a la actividad desplegada por los accionantes, más aún cuando se supera el límite indicado por la norma en cita que los determina entre un mínimo de 10 y un máximo de 150 salarios mínimos mensuales.

El fallo tal como fue redactado sólo condena al pago del incentivo a la "entidades" desconociendo el principio de igualdad en cuanto no lo hace para las empresas o entes de carácter privado.

#### **VII.47. APELACIÓN DEL MUNICIPIO DE BOJACÁ**

Según consta a folio 6057, interpuso recurso de apelación contra la sentencia de 25 de agosto de 2004, el 8 de septiembre de 2004, sin embargo no allegó el escrito de sustentación del mismo.

#### **VII.48. APELACIÓN DEL MUNICIPIO DE CHOCONTA**

Por medio de apoderado judicial en escrito radicado el 6 de septiembre de 2004 (fl. 5878), discrepó de la sentencia en los siguientes términos:

La decisión se produjo al margen de las posibilidades más que de orden económico (en cuanto contemplan la posibilidad de cofinanciación), sí de los trámites a las que las mismas han de estar sujetas, desconociendo el factor tiempo y los términos de la contratación administrativa. Agrega que en cuanto a la posibilidad de

Expediente No. 25000-23-27-000-2001-0479-01  
Acumulados Nos. 2000-0428, 2001-0122, 2001-0343  
Actor: GUSTAVO MOYA ÁNGEL Y OTROS  
Acción Popular

garantizar la operatividad y el mantenimiento de la PTAR, señala que si bien a la fecha se cuenta con un instrumento legal (Resolución de la CRA 287 de 2004), para incluir este pago con cargo a las tarifas de acueducto y alcantarillado, aún si se hiciera viable el subsidio, esta posibilidad queda sujeta a los estudios de estratificación con ajuste a las respectivas metodologías de planeación, así como la falta de disponibilidad de recursos asignados para la actual vigencia presupuestal, no da cabida a que el Municipio de entrada acarree transitoriamente con dicho gasto.

Finalmente manifiesta su inconformidad en relación con el incentivo en cuanto se deja de señalar dicha retribución a costa de los demás entes del orden público así como de la empresa privada, convocadas al proceso y el estimativo no refleja el compromiso que le asiste al Distrito Capital, frente a las demás entidades comprometidas.

#### **VII.49. APELACIÓN EL MUNICIPIO DE CUCUNUBÁ**

Por medio de apoderado judicial, cuyo poder adjunta con el escrito radicado el 8 de septiembre de 2004 obrante a folio 6220, interpuso recurso de apelación contra la sentencia de 25 de agosto de 2004, el cual no sustentó en la oportunidad procesal correspondiente.

Expediente No. 25000-23-27-000-2001-0479-01  
Acumulados Nos. 2000-0428, 2001-0122, 2001-0343  
Actor: GUSTAVO MOYA ÁNGEL Y OTROS  
Acción Popular

#### **VII.50. APELACIÓN DEL MUNICIPIO DE LA MESA**

En escrito radicado el 8 de septiembre de 2004, por medio de apoderado judicial interpuso recurso de apelación en contra de la sentencia de 25 de agosto de 2004, pero fue sustentado por fuera de la oportunidad procesal establecida.

#### **VII.51. APELACIÓN DEL MUNICIPIO DE SESQUILÉ**

A través de su representante legal interpuso recurso de apelación contra la sentencia de primera instancia en escrito radicado el 7 de septiembre de 2004 (folio 5916), el cual no fue sustentado en la oportunidad procesal correspondiente.

#### **VII.52. APELACIÓN DE LA EMPRESA COLOMBIANA DE CABLES S.A. -EMCOCABLES-**

En ejecución de arreglo de reestructuración, solicitó en memorial radicado el 8 de septiembre de 2004, aclaración del numeral sexto de la sentencia de 25 de agosto de 2004 en el sentido de que se precise que la empresa no es agente contaminador del río Bogotá, ni de sus quebradas o afluentes y subsidiariamente interpone recurso de apelación contra el primer aparte del numeral primero del "resuelve" de la sentencia, en consonancia con el numeral sexto, en cuanto a la omisión de determinar , como se hizo en la parte motiva, y como se deriva del pacto de cumplimiento aprobado, que el demandado no incurre en

Expediente No. 25000-23-27-000-2001-0479-01  
Acumulados Nos. 2000-0428, 2001-0122, 2001-0343  
Actor: GUSTAVO MOYA ÁNGEL Y OTROS  
Acción Popular

contaminación del río Bogotá ni de ningún otro cuerpo de agua.

#### **VII.53. APELACIÓN DE LA SOCIEDAD UNICONIC S.A.**

Por medio de su representante legal interpuso recurso de apelación (fl. 6364) contra el fallo proferido por el Tribunal de Cundinamarca, por considerar que la sociedad puede eventualmente resultar afectada en sus derechos adquiridos y desconocer sus derechos constitucionales y legales, como consecuencia de la orden impartida en el numeral 3º y/o demás numerales del proveído que se impugna, por cual solicitó se revoque la sentencia en los aspectos que afecten a la sociedad y reconocer la indemnización a que haya lugar con ocasión de los perjuicios que se pudieren causar a título de restablecimiento del derecho. No concedido por falta de legitimación.

#### **VII.54. APELACIÓN DE LA SOCIEDAD CONIGRAVAS S.A.**

En escrito radicado el 8 de septiembre de 2004(fl. 6368), interpuso recurso de apelación contra el fallo proferido por el Tribunal de Cundinamarca por considerar que la sociedad puede eventualmente resultar afectada en sus derechos adquiridos y desconocer sus derechos constitucionales y legales, como consecuencia de la orden impartida en el numeral 3º y/o demás numerales del proveído que se impugna, por lo cual solicitó se revoque la sentencia en los aspectos que afecten a la sociedad y

Expediente No. 25000-23-27-000-2001-0479-01  
Acumulados Nos. 2000-0428, 2001-0122, 2001-0343  
Actor: GUSTAVO MOYA ÁNGEL Y OTROS  
Acción Popular

reconocer la indemnización a que haya lugar con ocasión de los perjuicios que se pudieren causar a título de restablecimiento del derecho (fl. 6368). No fue concedido por falta de legitimación.

## VIII.

### TRÁMITE DE LA SEGUNDA INSTANCIA

Recibido el expediente en la segunda instancia fue repartido y correspondió al Despacho del Doctor Gabriel Eduardo Mendoza Martelo, Sección Primera del Consejo de Estado, surtiéndose la actuación en los siguientes términos:

#### VIII.1. AUTOS Y RECURSOS RESUELTOS EN LA SEGUNDA INSTANCIA

- Fls. 6598 a 6602, auto admite recursos apelación y se adoptan otras decisiones de fecha 14 de febrero de 2005.
- Fls. 6606 a 6610, memorial Defensoría del Pueblo Regional Cundinamarca, recurso reposición contra auto admite recursos de apelación.
- Fl. 6618 fija en lista, traslado art. 360 del C. de P.C.
- Fls. 6623 y 6625, Industrias Spring S.A. solicita aclaración del auto de 14 de febrero 2005 admitió recursos de apelación.
- Fls. 6643 a 6651, Secretario Sección Primera del Consejo de Estado, remite memorial radicado en esa dependencia presentado por la Defensoría del Pueblo, complementa recurso reposición.

Expediente No. 25000-23-27-000-2001-0479-01  
Acumulados Nos. 2000-0428, 2001-0122, 2001-0343  
Actor: GUSTAVO MOYA ÁNGEL Y OTROS  
Acción Popular

- Folio 7128, aviso 006, traslado del recurso de reposición, para los efectos del art. 180 del CCA 349 y 108 CPC, se fija en lista.
- Fls. 7791 a 7793, el apoderado de la CAR se opone al recurso de reposición interpuesto por la Defensoría del Pueblo Regional Cundinamarca. Contra auto concedió apelación fallo de primera instancia.
- Folio 7794 a 7797, INFORME SECRETARIAL 2 de marzo de 2005.: "Con recurso de reposición contra el auto de 14 de febrero de 2005, folios 6598, 6606 y 7128". (del cuaderno 9.3), y otros requerimientos desde el folio 6598 hasta el folio 7791 (del cuaderno 10).
- Fls. 7815 a 7836, memorial ciudadanos y habitantes Municipio de Sibaté, solicitan declarar nulidad a partir auto 31 de agosto de 2001, por falta de jurisdicción del Tribunal Administrativo de Cundinamarca.
- Fls. 7880 a 7881, auto da cumplimiento oficio Secretaría General y reconoce personería apoderados Ministerio de Ambiente, Vivienda y Desarrollo Territorial y de la Empresa de Energía de Bogotá S.A. E.S.P.
- Fl. 7903, informe Secretarial oficio 340 suscrito por la Secretaria General de la Corte Suprema de Justicia, anexa respuesta Tribunal Administrativo Sección Cuarta. (4 folios 7904 a 7907).
- Fl. 7908, auto ordena atender requerimiento oficio 340 de 2006.
- Fl. 8000 auto 22 de mayo de 2006, ordena: expedir certificación para la Sección Primera del Tribunal Administrativo de Cundinamarca y para la Sala Jurisdiccional Disciplinaria del Consejo Superior de la Judicatura y dar respuesta al oficio SJ 11389 de 30 de marzo de 2006.
- Fl. 8002, auto de 22 de mayo de 2006 decide recurso de reposición interpuesto por la apoderada de la Defensoría del Pueblo contra el proveído de 14 de febrero de 2005 que admitió el recurso de apelación contra la sentencia de 25 de agosto de 2004 y su complementaria de 16 de septiembre de 2004 (fls. 6606 a 6610). Confirma el proveído impugnado.

Expediente No. 25000-23-27-000-2001-0479-01  
Acumulados Nos. 2000-0428, 2001-0122, 2001-0343  
Actor: GUSTAVO MOYA ÁNGEL Y OTROS  
Acción Popular

- Fl. 8006, auto de 22 de mayo de 2006, reconoce personería apoderados municipio Mosquera, CAR, Ministerio de Comercio, Industria y Turismo, del señor Alfonso Pérez Preciado, tercero coadyuvante, del Municipio de Zipaquirá, del Municipio de Cajicá, del Departamento Administrativo del Medio Ambiente DAMA, del Ministerio de Agricultura y Desarrollo Rural, acepta renuncia del poder al señor Pedro Pablo Suárez, apoderado Municipio de Sopó decisión que ordena poner en conocimiento del Municipio de Sopó y ADMITE el recurso de apelación interpuesto por el apoderado de la sociedad Industrias Spring S.A. así como la apelación interpuesta en forma adhesiva por la Empresa de Energía de Bogotá; ordena no tener en cuenta el escrito obrante a folios 7211 a 7214 por cuanto no proviene de la parte ni de los terceros intervinientes en el proceso. No se tiene al Municipio de Nilo como tercero coadyuvante según solicitud obrante a folio 7050 por cuanto la oportunidad para ello ya precluyó. No se tiene como tercero a la sociedad CONSTRUCTORA PALO ALTO Y CIA S. EN C., por cuanto la oportunidad para ello ya precluyó.
- Fls. 8010 a 8012, auto de 22 de mayo de 2006, nulidad planteada por la sociedad SOFASA debe rechazarse de plano ya que se encuentra saneada según lo dispone el art. 144 núm. 3 del CPC, esto es que aceptó voluntariamente su vinculación al proceso. Decide: RECHAZASE DE PLANO la solicitud de nulidad planteada.
- Fls. 8013 a 8015, auto 22 de mayo de 2006, ordena rechazar de plano la solicitud de nulidad planteada por habitantes del Municipio de Sibaté, (fl. 7815 a 7827) por falta de interés jurídico para plantear la nulidad por cuanto la oportunidad para intervenir como coadyuvantes se encuentra vencida y, por lo tanto, no tienen la calidad de partes ni de intervinientes en el proceso.
- Fl. 8026, memorial Ministerio de Ambiente, Vivienda y Desarrollo Territorial promovió incidente de nulidad contra las actuaciones adelantadas por la

Expediente No. 25000-23-27-000-2001-0479-01  
Acumulados Nos. 2000-0428, 2001-0122, 2001-0343  
Actor: GUSTAVO MOYA ÁNGEL Y OTROS  
Acción Popular

magistrada conductora del proceso posteriores al auto de 21 de octubre de 2004. Con anexos folios 8028 a 8078.

- Fl. 8080 auto de 21 de julio de 2006, acepta renuncia poder Dr. Mario Antonio Amado Dueñas apoderado del Municipio de Sopó y ordena poner en conocimiento al poderdante de la decisión.
- Fl. 8086 auto 10 de agosto de 2006 ordena expedir la certificación solicitada por el apoderado de la CAR.
- Fl. 8095 auto 28 agosto de 2006, reconoce personería apoderado Municipio de Sopó y ordena copias requeridas Sección Tercera Tribunal Administrativo de Cundinamarca.
- Fls. 8162 a 8163 auto de 1 de marzo de 2007, reconoce apoderados: Fundación Amigos del Planeta, del Departamento de Cundinamarca, MATCO S.A., de la EAAB y en relación con la solicitud de MATCO advierte que será objeto de estudio en la sentencia.
- Fl. 8196 auto 20 abril de 2007 reconoce personería apoderados CRA, Municipio de Cota, MATCO S.A., Bogotana de Aguas y Saneamiento S.A., expedir las copias requeridas Sección Tercera del Tribunal y las solicitadas por el Municipio de Cota (fl. 8173)
- Fl. 8210 informe secretarial recibe memorial Dr. Nestor Raúl Correa, tener en cuenta incidente nulidad posterior al fallo. (fl. 8211)
- Fl. 8216 auto 28 de junio 2007, reconoce personería apoderados: Ministerio de Agricultura y Desarrollo Rural y ordena expedición copias solicitadas.
- Fl. 8257 auto de 14 de diciembre de 2007, requiriendo al solicitante de copias debe sufragar previamente el costo, ordena expedir copias requeridas juzgados, acepta renuncia poder apoderado municipio Gachancipá y solicita poner en conocimiento del poderdante y reconoce personería apoderado municipio Girardot, a la apoderada de la Personería de Bogotá y a la apoderada de la Secretaría Distrital de Ambiente.
- Fl. 8296 auto 1 de febrero de 2008, acepta renuncia poder apoderado municipio Chía y ordena poner en conocimiento poderdante, acepta renuncia poder

Expediente No. 25000-23-27-000-2001-0479-01  
Acumulados Nos. 2000-0428, 2001-0122, 2001-0343  
Actor: GUSTAVO MOYA ÁNGEL Y OTROS  
Acción Popular

municipio Madrid y Municipio de Girardot, reconoce personería apoderado municipio Funza y Cota, así como al apoderado de la CRA.

- Fl. 8494 memorial Ministerio Público solicita llevar a cabo audiencia pública dentro del proceso, solicitud que coadyuven los apoderados del Distrito Capital, de la CAR, de la EAAB y del Ministerio de Ambiente, vivienda y Desarrollo Territorial.
- Fl. 8532 auto de 3 de febrero de 2009 señala fecha para llevar a cabo la audiencia solicitada por el Procurador Delegado para el 11 de marzo de 2009.
- Fl. 8540, memorial Delegado del Ministerio Público solicita el aplazamiento de la audiencia en dos folios a continuación informe secretarial respectivo.
- Fl. 8543, auto de 10 de marzo de 2009, considera procedente la solicitud de aplazamiento de la diligencia y ordena fijar como nueva fecha el miércoles 6 de mayo de 2009 a las nueve a.m.
- Fl. 8558 memorial EMGESA solicita fijar nueva fecha de audiencia. Anexos hasta folio 8576.
- Fl. 8702 el Procurador Delegado solicita aplazar la audiencia por cuanto se están adelantando mesas de trabajo para consolidar cierre financiero.
- Fl. 8707 auto de 3 de junio de 2009, por ser procedente solicitud de aplazamiento audiencia solicitada. Se fija fecha para el 1 de julio de 2009 a las nueve a.m.
- Fl. 8709 auto 3 de junio de 2009, reconoce personería apoderado municipio Chía, apoderada municipio Madrid y de la EAA del municipio, apoderada Municipio de Sopó, apoderada Alpina y otros, apoderado EAAB, apoderado municipio Mosquera, apoderada CRA, apoderada principal Materiales de Colombia S.A., acepta renuncia apoderada del Distrito Capital y ordena poner en conocimiento del poderdante. Y las copias requeridas folio 8330.
- Fl.8717, memorial representante legal Girardotemos, solicita ser tenidos en cuenta sus argumentos y explique las razones por las cuales no fue admitida

Expediente No. 25000-23-27-000-2001-0479-01  
Acumulados Nos. 2000-0428, 2001-0122, 2001-0343  
Actor: GUSTAVO MOYA ÁNGEL Y OTROS  
Acción Popular

su participación en el proceso como coadyuvante.  
(fls. 8720 a 8758).

- Fl. 8837 solicitud Ministerio Público aplazar fecha audiencia fijada 1 julio de 2009.
- Fl. 8840, auto de 30 de junio de 2009, estima procedente solicitud y fija como nueva fecha el 12 de agosto de 2009 a las nueve a.m.
- Fl. 8843, auto 30 de junio de 2009, tiene Dr. Aldo Agustín Guarín Durán como apoderado de la Secretaría Distrital de Ambiente.
- Fls. 8871 a 8879 y dos casetes diligencia de audiencia pública verificada el 12 de agosto de 2009.
- Fl. 8898 transcripción diligencia de audiencia pública (fls. 8898 a 8931).
- Fl. 8932 memorial funcionarios asistirán continuación audiencia del MAVDT y del DNP.
- Fl. 8935 reanudación audiencia pública 19 de agosto de 2009, se suspende hacia las doce y treinta para ser continuada el 26 de agosto de 2009.
- Fls. 8973 a 8988, cd continuación diligencia de audiencia 26 de agosto de 2009.
- Fl. 9024 auto de 15 de diciembre de 2009, reconoce personería a la apoderada de Materiales de Colombia S.A., al apoderado del Ministerio de Ambiente Vivienda y Desarrollo Territorial, ordena atender requerimiento Juzgado 1 Administrativo, tener como apoderada a la doctora Lina Beatriz Torres Silva de la Sociedad Bogotana de Aguas y Saneamiento S.A., acepta sustitución fl. 8881, copia del audio , al apoderado de EMCOCABLES, copias a la EAAB, y reconoce al apoderado del Departamento de Cundinamarca. Así como autoriza copias solicitadas por éste. Autoriza copias a costa del peticionario y ordena copias requeridas por el juzgado 21. Reconoce apoderado CRA.
- Fl. 9157 memorial Ministerio Público Dr. Serrato solicita reanudar audiencia pública.

Expediente No. 25000-23-27-000-2001-0479-01  
Acumulados Nos. 2000-0428, 2001-0122, 2001-0343  
Actor: GUSTAVO MOYA ÁNGEL Y OTROS  
Acción Popular

- Fl. 9158 auto de 24 de enero de 2011, reconoce personerías y ordena certificar si la decisión respecto de la aseguradora fue o no apelada.
- Fl. 9170 oficio respuesta Aseguradora en el sentido de que no se encontró que la EEB haya presentado escrito de apelación.
- Fl. 9341 informe secretarial memorial Ministerio Público en 2 folios solicita reanudar audiencia.
- Fl. 9367 auto de 6 de septiembre de 2011 en el cual se considera sobre las pruebas solicitadas en los recursos de apelación y ordena negarlas por no satisfacer los supuestos de hecho que las normas refieren para su decreto y práctica en la segunda instancia. Sin embargo con el objeto de aclarar algunos aspectos esbozados por las partes se dispone adoptar algunas medidas para mejor proveer: - informe a la CAR actuaciones desplegadas Plan de Adecuación Hidráulica río Bogotá; Plan de manejo y recuperación ambiental de embalses, lagunas y humedales a lo largo de la cuenca; actividades desarrolladas recuperación zonas de manejo, preservación ambiental y ronda del Río, así como su financiación; actuaciones adelantadas para el control de la calidad hídrica del agua, planes respecto de contaminación industrial en la fuente, producción más limpia y financiación. Procesos sancionatorios por infracción normas ambientales, copia de los convenios, presupuesto entidad componente financiero, evaluación de costos, adquisición predial y foto aérea. Requerimientos a la EAAB, a Catastro distrital, al DAMA, al Ministerio de Minas y Energía al Ministerio de Medio Ambiente al departamento de Cundinamarca, y a cada uno de los municipios.
- Fl. 9377, auto de 24 de octubre de 2011 ordena expedir copias requeridas fl. 9345 y oficiar a la Contraloría remita Control de Advertencia.
- Fls. 10735 a 10753, Auto a través del cual se adoptó medida cautelar en relación con las obras del Interceptor Tunjuelo Canoas.

Expediente No. 25000-23-27-000-2001-0479-01  
 Acumulados Nos. 2000-0428, 2001-0122, 2001-0343  
 Actor: GUSTAVO MOYA ÁNGEL Y OTROS  
 Acción Popular

- Fls. 10774 a 10777, Recurso de reposición contra la medida cautelar presentado por el Distrito Capital.
- Fls. 10790 a 10794, Recurso de reposición contra la medida cautelar presentado por la E.A.A.B.
- Fls. 10795 a 10798, oposición frente al recurso de reposición presentado por el Distrito Capital por Emgesa.
- Fls. 10901 a 10806, auto que decidió recurso de reposición interpuesto por el Distrito Capital.
- Fls. 10818 a 10822, Oposición frente al recurso de reposición presentado por la E.A.A.B. por Emgesa
- Fls. 10848 a 10855, auto a través del cual se decidió el recurso de reposición interpuesto por la E.A.A.B.
- Fls. 10914, auto que decide peticiones varias de las partes en el proceso (copias, personerías, etc).
- Fls. 10917 a 10920, auto de requerimiento sobre el informe del cumplimiento de la medida cautelar, destinación y seguridad de recursos del FNR y Ministerio de Vivienda
- Fls. 10921 a 10922, auto que decreta inspección judicial
- Fl. 10923, auto de traslado del incidente de nulidad
- Fl. 10957, Emgesa interpone recurso de reposición auto 21-09-2012
- Fl. 10978, EAAB descorre traslado incidente
  
- Fl. 11062, Emgesa Recurso reposición auto 21-09-2012
  
- Fls. 11087 a 11096, Dra. Nelly Yolanda Villamizar respuesta requerimiento, labores proceso de verificación.
- Fl. 11097, D.C. descorre traslado recurso reposición EMGESA auto 21-09-2012
- Fl. 11098, EMGESA descorre traslado recurso de reposición auto 21 - 09- 2012
- Fl. 11149, auto despacho ordena inspección judicial 17 octubre 2012
- Fls. 11255 a 11257, acta diligencia de inspección judicial

Expediente No. 25000-23-27-000-2001-0479-01  
Acumulados Nos. 2000-0428, 2001-0122, 2001-0343  
Actor: GUSTAVO MOYA ÁNGEL Y OTROS  
Acción Popular

- Fls. 11454 a 11512, auto de 7 de noviembre de 2012, ordena levantar medida cautelar.
- Fls. 11522 a 11531, EMGESA solicita mantener medida cautelar.
- Fls. 11548 a 11569, EAAB recurso reposición auto dispuso levantar medida cautelar de fecha 7 de noviembre de 2012.
- Fls. 11662 a 11665, transcripción de la Audiencia Pública -Acta.
- Fls. 11884 a 11899, auto de fecha 15 de noviembre de 2012 realiza otros requerimientos
- Fls. 11900 a 11915, auto de 15 de noviembre de 2012 resuelve sobre incidente de nulidad planteado.
- Fls. 11916 a 11917 autoresuelve solicitud de EMGESA. (15 noviembre de 2012)
- Fl. 11918, Auto aclara que el término concedido en audiencia es para pronunciarse sobre los documentos allegados en la audiencia, (15 de noviembre de 2012).
- Fl. 12156, Bogotá D.C. secretarías de ambiente y salud, Descorre traslado recurso de reposición y solicita tener como recurso de reposición la solicitud de EMGESA S.A. de mantener la medida cautelar.
- Fl. 12159, EAAB Traslado escrito EMGESA, solicita se deniegue la solicitud de EMGESA de mantener la medida cautelar.
- Fl. 12162, EEB solicitud resolver llamamiento en garantía.
- Fl. 12166, EMGESA se pronuncia sobre recurso reposición levantamiento medida cautelar presentado por la EAAB.
- Fl. 12205 Girardotemos, descorre traslado solicitud EAAB, solicita se reformen los numerales 3, 4, 5, 6, 8, y 9 del auto de 29 de octubre de 2012. Igualmente afirma el memorialista que la responsabilidad sobre el Embalse recae no solo sobre la EAAB sino también sobre EMGESA pues está en la obligación de tratar las aguas previamente con desconocimiento de las normas contenidas en el Decreto 2811/74, del art.

Expediente No. 25000-23-27-000-2001-0479-01  
 Acumulados Nos. 2000-0428, 2001-0122, 2001-0343  
 Actor: GUSTAVO MOYA ÁNGEL Y OTROS  
 Acción Popular

211 del Decreto 1541 de 1978 y 113 del Decreto 1594 de 1984 y del Decreto 948/95 (arts. 2, 20, 33, y 73) Objeta el recurso de EMGESA para que sea rechazado.

- Fl. 12223, Emgesa da alcance a su solicitud radicada el 6 de noviembre de 2012 en cuanto no tiene por objeto atacar la providencia del 29 de octubre de 2012, por lo tanto solicita sea confirmada y no se de curso a la solicitud inicial.
- Fl. 13170, auto corre traslado alegar de fecha 14 de febrero de 2013.
- Fl. 13171, auto 14 de febrero de 2013 resuelve requerimientos pendientes.
- Fl. 13353 obra fijación en lista No. 021, por medio de la cual se corre traslado a las partes por el término de diez (10) días para alegar de conclusión.

#### **VIII.2. DOCUMENTOS ALLEGADOS EN LA SEGUNDA INSTANCIA**

- Fls. 6961 a 6972 anexa la CAR copia informal Tutela promovida por el MAVDT.
- Fls. 6973 a 7027, anexos CAR contrato BID y Conpes 3320.
- Fls. 7211 a 7214 ciudadanos Sibaté desconocimiento efectos cosa juzgada. Anexa decisiones judiciales fls. 7215 a 7275.
- Fls. 7276 a 7385 Plan de Desarrollo del Municipio de Gachancipá 2004-2007.
- Fl. 7911 Informe secretarial recibe oficio Tribunal Cundinamarca Sección Cuarta adjunta documentos en 69 folios.
- Fls. 7913 a 7978 escrito apoderado EMGESA en el cual solicita tener por agregado al expediente las resoluciones 506 de 28 de marzo de 2005 y 1189 de 2005 emanadas de la CAR las cuales aporta en copia auténtica; se haga un pronunciamiento de cómo deben proceder las entidades demandadas respecto de las obligaciones impuestas por la CAR e impartir órdenes a la CAR se abstenga de ejecutar los actos administrativos expedidos por ella.

Expediente No. 25000-23-27-000-2001-0479-01  
Acumulados Nos. 2000-0428, 2001-0122, 2001-0343  
Actor: GUSTAVO MOYA ÁNGEL Y OTROS  
Acción Popular

- Fls. 8106 a 8112, memorial apoderado Departamento de Cundinamarca solicita reconocer personería y allegar comunicado prensa CAR sobre recursos recuperación Río Bogotá.
- Fl. 8358, informe secretarial recibe memorial Dr. Andrés Caldas Rico con 9 folios anexos, apoderado general de EMGESA, solicita dar continuidad al proceso e informa sobre las obras adelantadas en el Embalse, adjunta CD, requiere además que haya una labor conjunta y coordinada de todos los agentes contaminantes.
- Fl. 8385 informe secretarial recibe memorial DIANA PATRICIA VARGAS URREGO ciudadana en 4 folios y un anexo sin foliar. Solicita requerir al Gobierno Nacional sobre los recursos destinados al proyecto "Ciudad ALO Segundo Centenario" y cuál es el estado del Megaproyecto de Saneamiento Ambiental del río Bogotá y el impacto de las obras de infraestructura. Anexa presentación "Proyecto Ciudad Alo Segundo Centenario" (fls. 8390 a 8483).
- Fl. 8493 memorial suscrito Roberto Serrato Valdés Procurador con documentos anexos en 36 folios.
- Fl. 8584 memorial suscrito Juan Antonio Arbeláez Buraglia, ingeniero químico con maestría en gestión y auditorías ambientales solicita se examinen los documentos que acompaña, memorial suscrito por el Contralor General y el Procurador General.
- Fls. 8615 a 8701, memorial suscrito por el ingeniero químico Juan Antonio Arbeláez, allega documentos y pone de presente la inconveniencia de la propuesta adoptada en la sentencia de primera instancia. Se destaca el documento "Cuenca Alta del río Bogotá REGIÓN PROGRAMA Plan de Ordenamiento Territorial", Sociedad Geográfica de Colombia Academia de Ciencias Geográficas y la Gobernación de Cundinamarca de diciembre de 2000. (fls. 8628 a 8701).
- Fls. 8714 a 8716 memorial Juan Antonio Arbeláez Buraglia. Modelo de intervención presentado por la EAAB para el tratamiento de aguas residuales del río Bogotá, observaciones críticas.

Expediente No. 25000-23-27-000-2001-0479-01  
Acumulados Nos. 2000-0428, 2001-0122, 2001-0343  
Actor: GUSTAVO MOYA ÁNGEL Y OTROS  
Acción Popular

- Fl. 8759, memorial apoderado sociedad STANTON & CIA S.A., adjunta informe gestiones cumplimiento pacto suscrito Tribunal de instancia.
- Fl. 8763, memorial Sociedad Papeles y Corrugados Andina S.A., adjunta informe cumplimiento del pacto suscrito Tribunal de instancia (fls. 8764 a 8794).
- Fl. 8859 memorial comité de gestión y seguimiento de la Agenda ciudadana de Control fiscal participativo para la descontaminación del río Bogotá.
- Fl. 8883 memorial Presidenta Empresa Energía de Bogotá S.A. E.S.P. adjunta documento "La empresa de energía de Bogotá S.A. E.S.P. (EEB) frente al Muña" presentado en la audiencia pública. Folios 8884 a 8897.
- Fl. 8958 memorial comentarios audiencia pública Alcalde Municipio de Sibaté y las falencias del sistema maestro de acueducto y alcantarillado del municipio a pesar de las afirmaciones hechas por la CAR.
- Fl. 8971, memorial Ministerio Minas y Energía sobre las labores desarrolladas por el Ministerio, fiscalización y seguimiento minero.
- Fl. 9093 informe secretarial memorial en 8 folios Contralor de Bogotá
- Fl. 9093c informe secretarial recibo memorial suscrito Javier Tamayo Jaramillo anexa documentos en 4 folios.
- Fl. 9093j informe secretarial recibe memorial Dr. Jaime Castro en 2 folios, comentarios observaciones Contraloría Bogotá planta tratamiento en Canoas, predios, costos, cierre financiero.
- Fl. 9032 informe secretarial memorial Dr. Ramiro Bejarano en 8 folios.
- Fl. 9096 informe secretarial memorial presentado Olga Nadesda Cabrera y otros en 40 folios, en representación Agenda Ciudadana de Control Fiscal Participativo para la Descontaminación del río Bogotá.

Expediente No. 25000-23-27-000-2001-0479-01  
Acumulados Nos. 2000-0428, 2001-0122, 2001-0343  
Actor: GUSTAVO MOYA ÁNGEL Y OTROS  
Acción Popular

- Fl. 9137 informe secretarial recibe memorial Hernando Robles Villa en 14 folios, Corporación girardotemos.
- Fl. 9197 Informe secretarial cumplido auto folio 9158. Oficios librados en respuesta a requerimientos, reconocimiento personería y documento del apoderado de la CAR en el cual se allega el ACUERDO DE COOPERACION PARA LA CONSTRUCCION DE LA PLANTA DE TRATAMIENTO DE AGUAS RESIDUALESDE CANOAS FASE I Y II de 21 de febrero de 2011 en los folios 9182 a 9196.
- Fl. 9199 informe secretarial recibe memorial Dr. Jaime Castro advierte sobre la existencia del control de advertencia hecho por la Contraloría general de la República.
- Fl. 9201 informe secretarial memorial suscrito Procurador Delegado Dr. Roberto Serrato adjunta 136 folios documento presentado al Procurador general de la Nación por la Red Nacional Regional y distrital de veedurías ciudadanas y control social. Refiere control de advertencia de la Contraloría general de la República.
- Fl. 9350 informe secretarial recibe memorial Ministerio Público en 15 folios relacionados control de advertencia allegado en copia por la red nacional, regional y distrital de veedurías ciudadanas.
- Fl. 9379 oficio Tribunal Administrativo de Cundinamarca Sección Cuarta Subsección B remite en quince folios acta de audiencia de verificación cumplimiento pactos aprobados en el proceso de la referencia.
- Fls. 9423 a 9434 Control de Advertencia al Acuerdo 22 de febrero de 2011
- Fls. 9436 a 9495 la CAR da cumplimiento al requerimiento ordenado por auto de 6 de septiembre de 2006 incluye CDs (5)
- Fls. 9496 a 9514 Informe Plan maestro de alcantarillado sanitario y pluvial del Municipio de Soacha. Incluye un CD.

Expediente No. 25000-23-27-000-2001-0479-01  
Acumulados Nos. 2000-0428, 2001-0122, 2001-0343  
Actor: GUSTAVO MOYA ÁNGEL Y OTROS  
Acción Popular

- Fls. 9516 a 9544 Municipio de Villapinzón: Plan Maestro obras realizadas y proyectadas incluye un CD.
- Fls. 9546 a 9550 Ministerio de Minas y Energía Remite mapa impreso de la Cuenca alta media y baja del río Bogotá con las zonas excluibles de la minería.
- Fls. 9553 a 9611 Municipio de Cajicá. Informe Planes Maestros de Acueducto y Alcantarillado y Plano de Uso de suelo relacionado cauce del río Bogotá.
- Fls. 9612 a 9615 Municipio de Sesquilé, Informe plan maestro de acueducto y alcantarillado y de saneamiento de aguas residuales, adjunta un CD.
- Fls. 9616 a 9725 Municipio de Gachancipá, Planes maestros de Acueducto y alcantarillado Municipal, obras de redes de alcantarillado de aguas negras y aguas lluvias, usos del suelo.
- Fls. 9726 a 9763 EAAB, actuaciones desplegadas relativas planes y proyectos dirigidos al saneamiento del río Bogotá y sus afluentes así como sus repercusiones presupuestales. Redes de aguas lluvias, construcción de interceptores, diseño y construcción sistema tratamiento aguas residuales, estado actual obras y proyecciones, presupuesto, componente financiero y económico, costos plantas tratamiento aguas residuales, planes maestros de acueducto y alcantarillado incluye un CD.
- Fls. 9764 a 9768 Municipio de Suesca, Informe infraestructura de alcantarillado y saneamiento básico del municipio. Incluye un CD.
- Fls. 9769 a 9845 Alcaldía municipal de Chía, Informe implementación plan maestro acueducto y alcantarillado y otras obras de mitigación y prevención. Incluye un CD.
- Fls. 9846 a 9927 Municipio de Tocancipá, Informe implementación plan maestro acueducto y alcantarillado y otras obras de mitigación y prevención. Usos del suelo en relación cauce río Bogotá, presupuesto y porcentaje destinado al saneamiento. Incluye un CD.

Expediente No. 25000-23-27-000-2001-0479-01  
Acumulados Nos. 2000-0428, 2001-0122, 2001-0343  
Actor: GUSTAVO MOYA ÁNGEL Y OTROS  
Acción Popular

- Fls. 9928 a 9980, Municipio de Funza, Informe Implementación Plan Maestro de Acueducto y Alcantarillado, Obras proyectadas saneamiento aguas residuales, usos del suelo, recursos destinados al saneamiento ambiental.
- Fls. 9981 a 10178 Municipio de Mosquera Informe compromisos aprobados Tribunal dentro de la acción popular, Implementación Plan maestro de Acueducto y Alcantarillado.
- Fls. 10180 a 10191, Municipio de Cogua, Informe Implementación Plan Maestro de Acueducto y Alcantarillado, Obras proyectadas saneamiento aguas residuales, usos del suelo, recursos destinados al saneamiento ambiental. Incluye un CD.
- Fls. 10200 a 10225 El Ministerio de Minas y Energía anexa copia concepto rendido al Ministerio de Ambiente.
- Fls. 10232 a 10254 Apoderado de EMGESA remite copia Convenio Interinstitucional EAAB, y EMGESA.
- Fls. 10263 a 10276 Secretaría Distrital de Ambiente Actividades de recuperación ambiental en el marco de la AP.
- Fls. 10280 a 10460 Coadyuvante segunda instancia. Anexa un CD y un DVD.
- Fl. 10468 El TAC Secretaría Sección Cuarta remite copia actas audiencias verificación
- Fls. 10703 a 10705, Informe de proyectos ejecutados dentro del Plan Maestro de Acueducto y Alcantarillado del Municipio de Soacha
- Fls. 10706 a 10734, Respuesta requerimiento de información de la E.A.A.B.
- Fls. 10823 a 10841, Análisis técnico de las posibles implicaciones que tendría la salida de generación eléctrica de Pagua
- Fls. 10845 a 10847, Informe CAR sobre la actuación administrativa respecto del permiso de vertimiento y ocupación de cauce.
- Fls. 10858 a 10859, Remisión por parte del Ministerio de Minas del análisis técnico de las

Expediente No. 25000-23-27-000-2001-0479-01  
Acumulados Nos. 2000-0428, 2001-0122, 2001-0343  
Actor: GUSTAVO MOYA ÁNGEL Y OTROS  
Acción Popular

posibles implicaciones que tendría la salida de generación eléctrica de Pagua

- Fls. 10877 a 10889, Remisión por parte del Ministerio de Minas del análisis técnico de las posibles implicaciones que tendría la salida de generación eléctrica de Pagua
- Fls. 10899 a 10908, Informe de la E.A.A.B. en el cual responde interrogantes sobre la construcción del interceptor Tunjuelo - Canoas
- Fls. 10911 a 10913, Informe E.A.A.B. sobre el cumplimiento de la medida cautelar
- Fl. 10924, Documento Megaproyecto río Bogotá (Alfonso Pérez Preciado)
- Fls. 11087 a 11096, Dra. Nelly Yolanda Villamizar respuesta requerimiento, labores proceso de verificación.
- Fl. 11102, Consorcio canoas respuesta auto 25-09-12 Informe Interventoría contrato 115-2009 Geología Predios Hacienda Canoas e INVIAS trazado interceptores y pozo ITC-12.
- Fls. 11103 a 11148, Consorcio Canoas Respuesta interrogantes auto 25-09-12
- Fls. 11187 a 11199, EMGESA allega Convenio Interinstitucional EAAB y EMGESA
- Fls. 11200 a 11216, Informe Audiencias Especiales Tribunal Administrativo de Cundinamarca Sección Cuarta Subsección B.
- Fls. 11219 a 11222, Diligencia de inspección Judicial Tribunal Administrativo de Cundinamarca.
- Fl. 11226, La Contraloría Delegada Sector infraestructura solicita autorización a la Corporación adelantar investigación establecer si hubo cambios en los estudios y diseños originales relacionados en el contrato.
- Fls. 11227 a 11230, Fundación Granja Ecológica preocupaciones sobre el río Bogotá y su recuperación.
- Fl. 11257, Consorcio Canoas allega documentos de interés

Expediente No. 25000-23-27-000-2001-0479-01  
Acumulados Nos. 2000-0428, 2001-0122, 2001-0343  
Actor: GUSTAVO MOYA ÁNGEL Y OTROS  
Acción Popular

- Fls. 11518 a 11520, CAR documento aclaratorio afirmaciones hechas en la diligencia de inspección judicial por la EAAB.
- Fls. 11542 a 11547, Ministerio Vivienda Ciudad y Territorio oficio refiere aspectos relacionados recursos y licencia ambiental
- Fls. 11670 a 11760, Gobernación Cundinamarca Informe ejecución sentencia primera instancia y copia presentación alusiva.
- Fls. 11869 a 11872, Compromiso recursos Ministerio Vivienda Ciudad y Territorio, tema recursos y llama la atención sobre las razones por las cuales es necesario construir la Estación Elevadora y la Planta de Tratamiento de Aguas Residuales en Canoas, por sus implicaciones en el sistema energético del país. Refiere igualmente el desarrollo de los Convenios y Acuerdos celebrados con posterioridad a la expedición de la sentencia de primera instancia, las obras ejecutadas y sus costos, las obras en ejecución y las ejecuciones pendientes de conformidad con lo establecido en el Acuerdo de 21 de febrero de 2011 entre el Ministerio de Ambiente, Vivienda y Desarrollo Territorial, el Departamento Nacional de Planeación, la Gobernación de Cundinamarca, la Alcaldía Mayor, la Secretaría Distrital de Hacienda, la CAR y la Empresa de Acueducto y Alcantarillado de Bogotá, el cual concretó los compromisos financieros y trámites presupuestales para asegurar la financiación de la PTAR en Canoas. La Planta se construirá en dos fases: Tratamiento Primario a Primario Químicamente asistido de hasta 14 m<sup>3</sup>/s y Tratamiento Secundario, con los respectivos costos estimados para la PTAR Canoas \$1.7 billones Fase I \$750.000 millones y Fase II \$906.000 millones (fl. 11870 vto.). Mediante Convenio Interadministrativo de cooperación 03MVCT de 30 de diciembre de 2011 suscrito entre la Alcaldía Mayor de Bogotá, la EAAB y el Ministerio; en Comité Técnico No. 77 de 29 de noviembre de 2011, el Viceministro de Agua y Saneamiento Básico del MVCT aprobó el proyecto "Construcción Estación

Expediente No. 25000-23-27-000-2001-0479-01  
 Acumulados Nos. 2000-0428, 2001-0122, 2001-0343  
 Actor: GUSTAVO MOYA ÁNGEL Y OTROS  
 Acción Popular

Elevadora de aguas residuales Canoas para el D.C. de Bogotá" el cual se presentó para ser financiado con aportes de la Nación a través de ese Ministerio, del FNR y de la EAAB E.S.P. (ver cuadro Fl. 11871). El FNR protocolizó el 28 de diciembre de 2011 y el Ministerio el 18 de octubre de 2011 con cargo al Convenio 03/11 la suma de \$21.378.504.676 a nombre de la fiduciaria CORFICOLOMBIANA y destaca que los recursos provenientes del Gobierno Nacional son de destinación específica por lo que, modificaciones en el proyecto como las planteadas por la Empresa de Acueducto y Alcantarillado de Bogotá, no sólo desconocen su rigor técnico sino que significarían la pérdida de estos recursos.

- Fl. 11951 a 11981, Informe EAAB estado actual obras saneamiento río Bogotá.
- Fl. 12057 a 12058, El Ministerio de Minas y Energía aporta documentos de interés al proceso: Plan de Mejoramiento de 29-03-2012; concepto previo no vinculante análisis aspectos técnicos, económicos y sociales de la actividad minera en la Sabana de Bogotá resolución en reemplazo de la 1197/04; Sector Eléctrico y represa del Muña, Cadena Pagua-Paraíso y anexa documento relacionado con la viabilidad de la PTAR CANOAS en relación con el Sistema Energético (fls. 12066 a 12130).
- Fl. 12131 el Consorcio Canoas manifiesta se encuentra a la espera de la entrega del predio "INVIAS", e informa que el contrato terminó el el 20 de noviembre de 2012.
- Fls. 12139 a 12150 y un CD, Informe Municipio de Chía solicita se incluya en el POT la gestión de riesgo (fl. 12151-12152) y recuperación de las zonas de riesgo (fls. 12153 y 12154).
- Fl. 12209, la EAAB allega documento ingeniero Hugo A. Garavito Director Red Troncal de Alcantarillado, presenta informe sobre el avance de las obras para el saneamiento del río Bogotá y sus afluentes y advierte que el Programa de tratamiento de aguas residuales hace parte del Programa de Saneamiento del río Bogotá y se limita a la construcción y

Expediente No. 25000-23-27-000-2001-0479-01  
 Acumulados Nos. 2000-0428, 2001-0122, 2001-0343  
 Actor: GUSTAVO MOYA ÁNGEL Y OTROS  
 Acción Popular

operación de plantas de tratamiento de aguas residuales urbanas y del sistema de interceptores que conducen las aguas residuales desde la ciudad a la planta. Dentro de este contexto destaca las actividades a su cargo: i) Sistema de tratamiento de Aguas Residuales: -PTAR Salitre, Fase I TQA con caudal medio de  $4\text{m}^3/\text{s}$  (2004) operada por la EAAB; Convenio 171/07 CAR asume construcción ampliación PTAR Salitre con un caudal de  $7.1\text{m}^3/\text{s}$  a nivel de tratamiento secundario (FASE II), cuenta con un diseño referencial contratado por la CAR, se espera que la CAR licite el diseño y construcción en el primer semestre de 2013. Construida la ampliación la PTAR será operada por la EAAB. -La segunda Planta de Tratamiento de Aguas Residuales no está construida ni existen diseños detallados. La sentencia del Tribunal dispuso su construcción en Canoas (Municipio de Soacha) a nivel de tratamiento primario químicamente asistido. La EAAB en la actualidad tiene contratado el diseño detallado de la PTAR y se espera iniciar la ejecución del contrato una vez se contrate la interventoría, proceso que está en curso. ii) Interceptores: La empresa ha construido los siguientes interceptores: Engativá-Cortijo (ENCOR), conduce las aguas residuales de Engativá la PTAR Salitre; - Fucha-Tunjuelo (IFT) no se ha puesto en operación; Tunjuelo-Canoas-Túnel de Emergencia (ITC-TE), ya construido pero aún no se ha unido porque falta construir el ITC 12, obra suspendida pero luego levantada la medida cautelar, sin embargo no se ha logrado acuerdo con el contratista para la construcción del pozo y la conexión de los dos tramos del interceptor. Interceptor Soacha: construido y conectado con el ITC. Ver cuadro estado obras fl. 12211. Destaca que la Estación Elevadora, Canoas y la PTAR Canoas en evaluación se encuentran pendientes de aprobar en la sentencia de segunda instancia del Consejo de Estado. La EAAB ha propuesto alternativas más económicas. iii) 3.1. **Saneamiento afluentes urbanos.** Implementación PMA

Expediente No. 25000-23-27-000-2001-0479-01  
 Acumulados Nos. 2000-0428, 2001-0122, 2001-0343  
 Actor: GUSTAVO MOYA ÁNGEL Y OTROS  
 Acción Popular

Cerros Orientales; recuperación rondas; recuperación humedales; estabilización riegos frente a los aguaceros torrenciales de algunas quebradas. rehabilitación, manejo y protección ambiental; construcción de los colectores de aguas lluvias; adecuación de las quebradas; construcción interceptores red secundaria para las aguas negras; construcción presa Cantarrana y adecuación del Embalse, dragado y realce jarillones ríos Tunjuelito y Bogotá; recuperación cauce río Tunjuelo y otras. En la Tabla 2 fls. 12211 vto., relaciona obras ejecutadas saneamiento afluentes urbanos folios 2004-2011.

**3.2 Avance del Proyecto construcción Estación Elevadora aguas residuales Canoas por el D.C.:** No está construida, fue objeto de diseño básico dentro del contrato No. 1-02-26100-711-2006 sin embargo, no cuenta con diseño detallado para construcción. **RECURSOS:** Aprobados en el año 2011 por un valor de \$327.360.743.085 con aportes por el 58% de la Nación y 42% de la Empresa de Acueducto y Alcantarillado de Bogotá. Para el desembolso de los recursos la Nación se encuentra por remitir al FNR, los términos de referencia para la contratación del mencionado proyecto. La razón, existe incertidumbre jurídica en relación con la construcción de la Estación Elevadora obra que beneficia únicamente al sector de generación eléctrica y no al saneamiento del río Bogotá.

**3.3 Informe Planes Maestros de acueducto y alcantarillado en los 42 municipios de la cuenca y resultados de la priorización de las obras de saneamiento.;** la EAAB cuenta con su Plan Maestro de Acueducto y Alcantarillado en ejecución; de los demás planes maestros no es responsable legalmente la EAAB aún cuando mediante convenios ha apoyado algunos proyectos en los municipios del Departamento. Tiene entendido que la Gobernación y la CAR han financiado parcialmente la estructuración de los PMAA de los municipios los cuales están en revisión y/o ejecución.

**3.4 Avances programa rehabilitación Sistema de Alcantarillado:** diagnóstico, diseño y rehabilitación redes, plan de

Expediente No. 25000-23-27-000-2001-0479-01  
Acumulados Nos. 2000-0428, 2001-0122, 2001-0343  
Actor: GUSTAVO MOYA ÁNGEL Y OTROS  
Acción Popular

corrección de conexiones erradas; aprobación del Plan de Saneamiento y Manejo de Vertimientos -PSMV, Resolución 3257/07, Secretaría Distrital de Ambiente incluye inspección a los colectores pluviales con circuito cerrado de televisión para determinar la procedencia de las conexiones erradas: Humedal Córdoba usuarios residenciales; zona Montevideo: usuarios industriales que permitió establecer el procedimiento para conexiones erradas previsto para incorporar en el contrato de condiciones uniformes de la Empresa actualmente en etapa de consulta ante la CRA. **3.5 Estado diseño PTAR Canoas** El 7 de diciembre de 2011 se suscribió el contrato No. 1-02-25500-0690-2011 por valor de \$25.720.406.841 en un plazo de 26 meses; contratista Consorcio CDM-INGESAM, integrado por las firmas INGESAM LTDA: y COMP. DRESSER & MCKEE INC., cuyo objeto es "realizar el diseño a nivel de ingeniería de detalle de la Planta de Tratamiento de aguas residuales de Canoas en los componentes asociados al Sistema de Tratamiento primario con asistencia química", Estado: revisión de requisitos previos firmar acta de inicio y se ha determinado la NO OBJECCIÓN tanto al plan de calidad como a la planificación de recibo de producto. La suscripción del acta de inicio se encuentra pendiente y se realizará una vez se cuente con la interventoría especializada internacional. La cual está en proceso de contratación. **3.6 Avance términos de referencia contratar la construcción de la PTAR Canoas.** Los pliegos para contratar la construcción de la PTAR Canoas es uno de los productos esperados del contrato 1-02-25500-0690-2011 consorcio CDM-INGESAM hasta dentro de 26 meses luego de iniciados los diseños. **3.7. Estudios alternativa seguir para el Programa de Saneamiento del río Bogotá.** Anexa estudio económico financiero que lleva a recomendar el estudio de una alternativa diferente a Canoas (fl. 12222) anexo 5 medio magnético. **3.8. Informe en detalle asignación de competencias técnicas y jurídicas del Programa de Saneamiento del río Bogotá.** Es un proyecto de orden

Expediente No. 25000-23-27-000-2001-0479-01  
Acumulados Nos. 2000-0428, 2001-0122, 2001-0343  
Actor: GUSTAVO MOYA ÁNGEL Y OTROS  
Acción Popular

nacional refiere sentencia de la Sección Segunda del Consejo de Estado de junio 5 de 2001 AP-0305-01). A nivel distrital está consagrado en el POT de 2000 que obligó a la EAAB a la construcción de un sistema integral de tratamiento de aguas residuales que por su complejidad podrá estar sujeto a cambios; en el proceso AP 9479 01 se estableció que el programa de saneamiento del río Bogotá requería de una concepción de tratamiento de cuenca que implica la participación de los municipios que lo integran, el departamento de Cundinamarca, la Nación, la CAR y las empresas privadas que se encuentran a lo largo del a cuenca; por ello, la Empresa presentó un proyecto de pacto que involucraba un plan de obras hasta el año 2015; en cuanto a las actividades relacionadas con captación tratamiento, transporte y distribución de agua potable, recolección de aguas residuales y sus tratamiento, mantenimiento de humedales tienen relación directa con el impacto ambiental de la Cuenca Media del río Bogotá. Tiene además un componente técnico y financiero, el primero fue adoptado por el Tribunal, el segundo carece de recursos que permita la contratación de las obras, construcción de interceptores (ya construidos), la Estación Elevadora y la PTAR Canoas, razón por la cual la EAAB decidió apelar con el objeto de que se definan las responsabilidades de cada una de las partes involucradas en el proceso. Refiere entonces el documento CONPES 3320; el Plan de Desarrollo 2010-2014 Ley 1450 de 2011, art. 131. Reitera que la empresa tiene jurisdicción en el territorio del D.C. sin perjuicio de celebrar convenios interadministrativos que puedan acometer proyectos con otras jurisdicciones. El Convenio 171 de 2007 y el Convenio de 2011. **3.9. Comparación de los costos de las soluciones de la construcción de la PTAR y de la Estación Elevadora en Tunjuelo-Canoas o Carboneras** (ver tablas 3,4 y 5 fls. 12217 (vto.) y 12218. **3.10. Informe sobre inversiones y ejecuciones realizadas por la Empresa de Acueducto y Alcantarillado de Bogotá**, Convenio 171 de 2007 ver

Expediente No. 25000-23-27-000-2001-0479-01  
 Acumulados Nos. 2000-0428, 2001-0122, 2001-0343  
 Actor: GUSTAVO MOYA ÁNGEL Y OTROS  
 Acción Popular

tabla folio 12219. **3.11 Informe planes anuales de inversión y rehabilitación de redes Acueducto y Alcantarillado de Bogotá**, ver tabla 7 fl. 12.219 (vto.). **3.12. Informe del volumen, proyección de volumen, tratamiento, disposición y costos de disposición de biosólidos.** PTAR Salitre: 4.300 toneladas mensuales proyectada para 2013, fluctúa acorde con las condiciones climáticas y dilución del agua. Manejo: Proceso de deshidratación, transporte y aprovechamiento predio El Corzo utilizada la mezcla para la cobertura vegetal y recuperación del suelo degradado **3.13 Manejo y rehabilitación de las conexiones erradas en Bogotá** (respuesta 3.4). **3.14. Constitución, administración, manejo y ejecución del Fondo Cuenta Saneamiento río Bogotá constituido el 27 de diciembre de 2005** administrado por la Secretaría de Hacienda Distrital en el cual se depositan los recursos ordenados en la sentencia (ver cuadro fl. 12221.).

- Fl. 12225, CRA informe atendiendo requerimiento sobre sistema de tarifas Resolución CRA 287/04 art. 16 párrafos 1, 2, 3 y 4. Las modificaciones al procedimiento de fórmulas tarifarias Resolución CRA 151/01, modificada por la Resolución 271/03. Refiere en este sentido su competencia para fijar el procedimiento no así la tarifa.
- Fls. 12303 a 12355, Secretaría Distrital de Ambiente, Informe subdirección recurso hídrico y del suelo, evidencia acciones adelantadas control de vertimientos río Tunjuelo y resumen ejecutivo de las acciones de control de San Benito y Gravilleras cuenca Tunjuelo, adjunta CD con los conceptos técnicos de curtiembres y gravilleros para cada uno de los predios. Dentro de las conclusiones que plantea el informe se tiene: "(...) en la actualidad la totalidad de los industriales pasan de no contar con unidades de gestión para sus vertimientos a contar con sistemas preliminares y primarios de tratamiento (Pocetas de sedimentación, tanques de sedimentación, rejillas, trapas de grasas, tanques de tratamiento y el sistema por flotación DAF). Los

Expediente No. 25000-23-27-000-2001-0479-01  
Acumulados Nos. 2000-0428, 2001-0122, 2001-0343  
Actor: GUSTAVO MOYA ÁNGEL Y OTROS  
Acción Popular

cuales por su tiempo de retención disminuyen la concentración de sólidos sedimentables, grasas y aceites, sólidos totales y materia orgánica, lo que indica la tendencia positiva hacia el cumplimiento normativo a través del tiempo para los siguientes parámetros, grasas y aceites y sólidos sedimentables. "(...) Se ha observado que el sistema de tratamiento preliminar (generalmente compuesto por pocetas sedimentadoras, rejillas, filtros multimedios, trampas de grasas y presedimentadores) logra remover la mayor cantidad de cargas contaminantes del agua con cerca de un 93% en las aguas residuales provenientes del proceso de pelambre y un 66.73% en las demás descargas (...)". En relación con las Gravilleras río Tunjuelo, la subdirección del recurso hídrico y del suelo, a través de las visitas de vigilancia y control ambiental a las empresas dedicadas a la trituración de material pétreo, ubicadas al margen del río Tunjuelo en las localidades de Usme y Ciudad Bolívar, específicamente en el tramo comprendido desde la descarga de la quebrada Yomasa hasta la entrada al relleno sanitario Doña Juana, tiene identificadas cuatro grandes zonas en las que se llevan a cabo este tipo de actividades. Concluye el informe: "6.1 Para el tramo comprendido desde la descarga de la Quebrada Yomasa al río Tunjuelo hasta el puente de la Avenida Boyacá entrando al relleno sanitario Doña Juana, se concentran aproximadamente once plantas de beneficio de material pétreo, las cuales se encuentran divididas así: Se encuentran dos (2) plantas de beneficio en el predio Cantarrana y seis (6) en el predio La Perdigona, para un total de ocho (8) plantas en la localidad de Usme. En el predio El Rubí, propiedad de la sociedad equipos Universal, se encuentran un total de tres (3) plantas de beneficio ubicadas en la localidad de Ciudad Bolívar. 6.2 La Subdirección del recurso hídrico y del suelo (antes Oficina de Control de Calidad y uso del agua) ha ejecutado las acciones de evaluación control y seguimiento ambiental generando

Expediente No. 25000-23-27-000-2001-0479-01  
 Acumulados Nos. 2000-0428, 2001-0122, 2001-0343  
 Actor: GUSTAVO MOYA ÁNGEL Y OTROS  
 Acción Popular

un total de 33 actuaciones técnicas comprendidas entre conceptos, e informes técnicos (...)” Dentro de las funciones de control y vigilancia señala que la Dirección de Control Ambiental de la Secretaría Distrital de Ambiente, ha proferido los actos administrativos que en derecho corresponden y de acuerdo con los conceptos técnicos proferidos por la subdirección del recurso hídrico y del suelo, y en cumplimiento de las normas ambientales que regulan la materia de vertimientos y en pro de la protección del río Tunjuelo, señala que dentro de las gestiones adelantadas también ejerce actividades de evaluación y seguimiento sobre los establecimientos de comercio, con el fin de que se ajusten al cumplimiento de los lineamientos técnicos y jurídicos que rigen la materia.

- Fl. 12356, EMGESA Informe anexo con 117 folios respuesta a requerimiento de 21 de noviembre de 2012.
- Fls. 12359 a 12393, Departamento Nacional de Planeación y Dirección de Regalías del Departamento Nacional en Liquidación, da respuesta requerimiento judicial contenido oficio 9912 de 22 de noviembre de 2012. -Anexa copia del acuerdo 071 de 28 de diciembre de 2011, “Por el cual se aprueban proyectos para ser financiados con recursos del Fondo Nacional de Regalías y se asigna su ejecutor”- Informe sobre el esquema de financiación del Programa de Saneamiento del río Bogotá componente y monto de la proyección de inversiones “Descripción General del Modelo financiero (Modelo PTAR Canoas y modelo PTAR Salitre)- supuestos macroeconómicos. Inversión aproximada Programa de saneamiento río Bogotá, 5.92 billones de pesos para el año 2012. Ver CD incluye proyectos autorizados DNP incluida PTAR Canoas.
- Fl. 12394, la CAR da respuesta al requerimiento incorporada al proceso como anexo 2 del cuaderno 19.
- Fls. 12432 a 12443, Función de Advertencia de la Contraloría General de la República sobre el Acuerdo 22 de febrero de 2011 Programa Saneamiento río

Expediente No. 25000-23-27-000-2001-0479-01  
Acumulados Nos. 2000-0428, 2001-0122, 2001-0343  
Actor: GUSTAVO MOYA ÁNGEL Y OTROS  
Acción Popular

Bogotá. Considera la Contraloría que la contratación que realmente se va a efectuar, el sitio en donde se pretende ubicar la PTAR Canoas, la planta o estación de bombeo elevadora ya no sería una obra puntual y relativamente pequeña como se le hizo ver al Tribunal de Cundinamarca, por el contrario, de los planos anexos a la invitación pública ICSM-0731-2009 cursada por la Empresa, tal planta elevadora deberá tener la capacidad de vencer la gravedad de una masa de aguas residuales hasta de  $37\text{m}^3/\text{s}$  en 46 metros de bombeo vertical, además representa la mayor excavación y construcción de estructuras subterráneas para dos pozos circulares de 44m y 53m de diámetro separados por 70M e interconectados por un túnel adicional, con capacidad para la instalación de rejillas de cribado y el segundo para la instalación y funcionamiento de hasta seis bombas cada una con capacidad de hasta  $5.5\text{M}^3/\text{s}$ . Razón por la cual advierte que de presentarse un fallo confirmatorio la empresa estaría llevando a una tergiversación del contenido de la sentencia en cuanto la modalidad de las obras a contratar, ya que de una estación elevadora de 5M de altura de bombeo, en la práctica, el cumplimiento de la sentencia judicial, se vería forzado a que fiscalmente se sufragaran los costos del túnel realmente ejecutado que implica el mayor valor resultante de la diferencia en la altura de bombeo y obras concomitantes anteriormente indicadas (fl. 12438). Agrega la Contraloría que el acometer de tal manera la obra propuesta conduce a la utilización del túnel de emergencia de forma permanente, por otra parte no garantiza ningún tratamiento sobre las aguas contaminadas que son aisladas durante un trayecto del río Bogotá, pero que aguas más abajo resultan vertidas de forma más gravosa para el medio ambiente, porque se ha cerrado un trayecto sobre superficie que puede incidir positivamente en las posibilidades de auto recuperación del río ; pues el ente fiscalizador no concuerda con la consideración de la EAAB de señalar que el río tiene "nula

Expediente No. 25000-23-27-000-2001-0479-01  
Acumulados Nos. 2000-0428, 2001-0122, 2001-0343  
Actor: GUSTAVO MOYA ÁNGEL Y OTROS  
Acción Popular

capacidad de autodepuración". Ello, señala la Contraloría puede implicar una afectación del patrimonio público y de los recursos naturales renovables porque: La invitación pública se efectuó antes de la sentencia definitiva y no se tuviera certeza sobre la existencia de la financiación de la PTAR Canoas, del interceptor Canoas-Alicahín ni de la estación elevadora de Canoas, el presupuesto podría resultar insuficiente para respaldar las cifras que allí se comprometieron. En estos términos llama la atención que la Empresa comprometió recursos que llegan de manera preliminar a los cuatrocientos mil millones de pesos para la construcción del interceptor Tunjuelo-Canoas, así como los recurso a invertir en la estación de bombeo de aguas residuales en Canoas que cuentan con un presupuesto oficial de US\$81.164.268 dólares y (\$32.799.973.422) pesos, sin que obre coordinación interinstitucional, así como una discusión técnica, académica, científica y pública sobre la pertenencia de obras que antes de tratar el recurso hídrico en torno a su descontaminación, lo que hacen es trasladar la problemática kilómetros más abajo. Esta segunda obra se encuentra suspendida y a juicio de la CGR debió ser estudiada a cabalidad antes de siquiera haberse iniciado. Ello conduce a que sin contar con la financiación de la Mega planta de Tratamiento Canoas, las aguas residuales conducidas por el sistema de interconectores terminen utilizando el desfogue de emergencia que por gravedad entrega las aguas residuales después de las compuertas de Alicachín, sin ningún tratamiento, en el Acuerdo firmado se condiciona una decisión futura de la Car sobre concesión de agua a EMGESA con el consecuente riesgo de elusión de la responsabilidad sobre la contaminación que en ese caso, no se alcanzaría a cubrir con la posible auto recuperación del Río hasta Girardot, generando una amenaza hasta para el río Grande de la Magdalena. En estos términos la Contraloría concluye que el Programa de Saneamiento del río Bogotá posee un alto grado de

Expediente No. 25000-23-27-000-2001-0479-01  
Acumulados Nos. 2000-0428, 2001-0122, 2001-0343  
Actor: GUSTAVO MOYA ÁNGEL Y OTROS  
Acción Popular

incertidumbre toda vez que las fuentes de financiación establecidas en el Acuerdo firmado el 22 de febrero de 2011 no cuentan con un soporte financiero, presupuestal, técnico y legal suficiente y siguen siendo las presentadas al ente de control hace más de dos años sin que se presenten fórmulas diferentes para garantizar su efectiva apropiación, ni conocer el proyecto definitivo ni las licencias respectivas. Finalmente advierte sobre el impacto a la tarifa de alcantarillado o a los excedentes financieros de la Empresa por la obra suspendida.

- Fl. 12445, Ministerio de Ambiente y Desarrollo Sostenible remite la solicitud a la Autoridad Nacional de Licencias Ambientales, Decreto 3573 de 2011.
- Fls. 12448 a 12455, el Departamento de Cundinamarca adjunta informe de la Gerente de las Empresas Públicas del Departamento sobre acompañamiento recepción de las plantas de tratamiento de aguas residuales por los municipios, advierte que el Gobierno Nacional no ha hecho un pronunciamiento sobre el manejo presupuestal y financiero de los costos de operación de las mismas por los municipios, pues la CRA mantiene el mismo sistema tarifario.
- Fl. 12457, el Departamento de Cundinamarca memorial anexa Plano de usos del suelo del río Bogotá con su estratificación. Ver DVD folio 12457A.
- Fls. 12458 a 12459, el Municipio de Sibaté, allega documentación y certificaciones relacionadas con el requerimiento punto 8° del oficio de fecha 6 de septiembre de 2011, destaca PMAA que incluye colectores de aguas lluvias y del proyecto radicado ante el Ministerio de Ambiente y Desarrollo Sostenible para la financiación del mismo. Destaca que a través de mesas de trabajo se está concretando cronograma para que las empresas sancionadas por el bombeo de aguas contaminadas compensen con la construcción y puesta en marcha de las plantas de tratamiento de aguas residuales incluyendo obras de conducción, proyectado para su entrega en el año

Expediente No. 25000-23-27-000-2001-0479-01  
Acumulados Nos. 2000-0428, 2001-0122, 2001-0343  
Actor: GUSTAVO MOYA ÁNGEL Y OTROS  
Acción Popular

2014. Llama la atención que del presupuesto de rentas y gastos de 2012 el municipio apropió el 3.84% con destino al sector denominado agua potable y saneamiento básico, que representa el 4.85% de los gastos de inversión.

- Fl. 12496, el Ministerio de Minas y Energía en respuesta al oficio 9919 de 22 de noviembre de 2012, informa sobre los proyectos, recursos disponibles y vigencias asignadas a proyectos de saneamiento del río Bogotá, requisitos y cumplimiento de los mismos. Agrega que hecha la revisión de los proyectos hechos en el BPIN (Banco de Proyectos de Inversión), en los últimos años no se encontraron proyectos relacionados con el saneamiento del río Bogotá y sobre el proceso de liquidación del FNR, remitió el requerimiento a la Dirección de regalías del Departamento Nacional de Planeación, entidad competente.
- Fl. 12499, la EAAB presenta informe requerido en auto de 15 de noviembre de 2012. Precisa que hay que diferenciar el proyecto de saneamiento del río Bogotá y el Programa de Tratamiento de las aguas residuales de la ciudad de Bogotá, éste último es un programa interinstitucional en el cual intervienen entidades del orden nacional, departamental y municipal así como empresas privadas, cuyo objeto es la recuperación del río Bogotá y su cuenca hidrográfica desde el nacimiento en Villapinzón hasta su desembocadura en Girardot, incluye múltiples actores y diversidad de responsables; comprende restauración de páramos y cuencas altas, control de erosión, regulación de caudales, control de inundaciones, adecuación hidráulica, control de vertimientos, tratamiento de aguas residuales domésticas e industriales, control de la minería, control de insumos agropecuarios, etc. El tratamiento de aguas residuales forma parte del programa de saneamiento del río Bogotá y se limita a la construcción y operación de plantas de tratamiento de aguas residuales urbanas PTARS y del sistema de interceptores que conducen las aguas

Expediente No. 25000-23-27-000-2001-0479-01  
Acumulados Nos. 2000-0428, 2001-0122, 2001-0343  
Actor: GUSTAVO MOYA ÁNGEL Y OTROS  
Acción Popular

residuales desde la ciudad o municipio hasta la PTARs. Dentro de este esquema la empresa se refiere al Sistema de Tratamiento de Aguas Residuales.

- Fl. 12513, la EPM da respuesta requerimiento oficio 9920 de 30 nov. 2012, manejo biosólidos. Afirma que en la PTAR San Fernando se han generado entre el 1º de enero y el 31 de octubre de 2012, 25.277.31 Toneladas de biosólidos con un promedio de 2.527.7 TON/MES. Este volumen es directamente proporcional al agua tratada lo que permite afirmar que para el 2013 se generaran 31.242.76 Toneladas. Los biosólidos se obtienen a partir de digestión anaerobia utilizada para estabilizar los lodos producto del tratamiento de aguas residuales. El biogás obtenido se inyecta a los motogeneradores, generando en diez meses 4.565.059 KWH autoconsumidos. PTAR San Fernando \$825.455.322. Gastos de Transporte: \$511.548.556; espesamiento y deshidratación: \$355.843.818 y consumo de energía \$241.137.145.
- Fl. 12514, el Municipio Chocontá, justifica inasistencia y responde requerimiento auto 15 nov. 2012: -Avances construcción redes acueducto y alcantarillado eje urbano; -Informe curtiembres municipio: listado Chocontá y Villapinzón entregado a la UMATA Chocontá.; -No cuenta con información sobre curtiembres en operación, cuáles cerradas, cuáles tienen plan de manejo y cuáles no.- Tampoco cuenta con censo de la población que se dedica a esta actividad ni de su caracterización económica.- Sobre las actuaciones desarrolladas para la determinación y ubicación del polígono industrial para la relocalización de curtiembres existe la Unidad de Planificación rural que además requiere aprobación de la CAR pero a la fecha no ha respondido.
- Fl. 12516, el Municipio de Chocontá presenta informe requerimiento sobre las redes de Acueducto y Alcantarillado urbano: contrato construcción redes con recursos CAR; contrato obra 034/12 por

Expediente No. 25000-23-27-000-2001-0479-01  
 Acumulados Nos. 2000-0428, 2001-0122, 2001-0343  
 Actor: GUSTAVO MOYA ÁNGEL Y OTROS  
 Acción Popular

\$14.313.000 en reemplazo red de alcantarillado sanitario barrio Los Prados; redes de agua potables en CVC al 100% y pendiente la entrega de diseños PMAA que adelanta la Gobernación de Cundinamarca para luego ser aprobado por el Ministerio con el objeto de viabilizar los recursos de implementación y ejecución anexa cuadros a folios 12520 a 12529.

- Fl. 12530, el Municipio de Sesquilé, informa sobre el contrato suscrito con el Departamento -PMA urbano, para lo cual requerirá a las EPC sobre el avance del contrato.; informa igualmente sobre el proceso de contratación del sistema eléctrico de la PTAR del municipio y el estado actual de la operación frente al hurto del transformador de la PTAR, ante la aseguradora y CODENSA para su consecución y ubicación.
- Fls. 12531 a 12669, en atención al auto de 15 de noviembre de 2012, la Car complementa respuesta de 30 de noviembre de 2012: -Acta de liquidación contrato 735/09 COA 6579-BID "Diseños de detalle para la construcción de obras de saneamiento en los municipios Cuenca río Bogotá, paquete I" y acta de liquidación contrato 543 de 2010, COA 6925-BID "Diseños de detalle para la construcción de obras de saneamiento en los municipios de la cuenca del río Bogotá, paquete II" Ejecución: marco Convenio ATN/OC10208-CO BID (1); - Certificado del pago por el DC y los municipios de la tasa retributiva y permisos de vertimiento, anexa la correspondiente relación de pagos (2) (fl. 12543. -Plan mitigación inundaciones: Resumen Plan Acción Trienal 2007-2009; la relación de contratos suscritos Colombia Humanitaria mitigación inundaciones ola invernal (4); -Obras de dragado, adjudicación licitación pública LPN-BM-01 2011 (6); recuperación ronda del río, Acuerdos Nos. 17 y 30/09, determinan la ronda técnica del río Bogotá y las zonas de utilidad pública del proyecto (8) (ver folio 12567); - Metodología para calcular el caudal ecológico y el calculado para el Salto de Tequendama (19);- La Car no ha determinado el caudal ecológico para el sector

Expediente No. 25000-23-27-000-2001-0479-01  
Acumulados Nos. 2000-0428, 2001-0122, 2001-0343  
Actor: GUSTAVO MOYA ÁNGEL Y OTROS  
Acción Popular

Compuertas Alicachín-Salto de Tequendama ni adoptado metodología alguna. Viene adelantando algunos procesos, el Ministerio de Ambiente y Desarrollo Sostenible expidió la Resolución 865/04 relacionada con la metodología , índice de escasez y en el punto 3.4.2 reducción por caudal ecológico para ser tenidos en el Plan de Acción 2012-2015. -Indica que corresponde a la autoridad ambiental estudiar las condiciones particulares de sus cuencas y escoger una o varias metodologías que se ajusten a dichas condiciones y la información disponible.-La Car cuenta con una red hidrometeorológica con 150 estaciones distribuidas en toda la jurisdicción que monitorea el comportamiento de las condiciones climatológicas e hidrológicas de la cuenca. -Informe sobre los procesos sancionatorios ver cuadro fls. 12533 y 12534.

- Fl. 12670, la Unidad Administrativa Catastro Distrital, remite copia plano catastral actualizado, loteo cauce río Bogotá, con una distancia de 300 mts a lado y lado, responde oficio 9934.
- Fl. 12672 la EAAB da respuesta a las afirmaciones hechas por EMGESA.
- Fl. 12678 el Municipio de Gachancipá da respuesta al oficio 9924 de noviembre 22 de 2012, allega informe estado actual PTAR municipio transferida Resolución CAR 2266 de 21 de septiembre de 2012, la cual se compone de una infraestructura física y el predio denominado Planta de Tratamiento bajo el mecanismo "APORTES BAJO CONDICION", informe sobre el contrato suscrito con el Departamento "Tratamiento aguas residuales". Vinculación al Plan Departamental de Aguas que comprometió el 60% de los recursos del SGP de agua potable y saneamiento básico 2009-2034. El 15 de julio de 2009 suscribió con la EPC el Convenio de cooperación y apoyo financiero para la vinculación del Municipio de Gachancipá al Plan Departamental de Aguas. Formulación PMA: estudio, diseño y construcción red de alcantarillado San Martín, El Roble, Centro-Sector Betania y Roble Sur.

Expediente No. 25000-23-27-000-2001-0479-01  
Acumulados Nos. 2000-0428, 2001-0122, 2001-0343  
Actor: GUSTAVO MOYA ÁNGEL Y OTROS  
Acción Popular

- Fl. 12689, coadyuvante segunda instancia, María José Páez Díaz, cuestiona intervención entidades públicas audiencia y hace propuestas. Reitera argumentos memorial 5 de junio de 2012 en 183 folios y hace un cuestionamiento a la intervención de las autoridades públicas en la audiencia y a la posible solución técnica.
- Fl. 12693, Municipio Villapinzón, i) Informe Plan Maestro: Convenio Asociación No. 236/06; contrato 039 de 22-nov-2006; Acuerdo 010/08 autorizó al alcalde a vincularse al Plan Departamental para el manejo empresarial de los servicios de agua y saneamiento -PDA-; EPC contrató la firma CONTELAC LTDA. actualización Planes Maestros de Acueducto y Alcantarillado; contrato CAR 745-09; mediante oficio DA-100-728 de 18-X-2012 el municipio radicó ante la CAR, estudios y diseños construcción PTAR con el fin de solicitar recursos; Acuerdo 029/09 el Concejo Municipal facultó al alcalde declarar de utilidad pública e interés social el predio o predios necesarios para la construcción de la PTAR y adelantar el proceso de adquisición de dichos inmuebles. ii) Situación de las curtiembres, corresponde a la CAR por lo cual remite el listado enviado por la CAR en lo relativo a Curtiembres de octubre de 2012; relaciona el censo de las personas que se dedican a esta actividad y las actividades que ha realizado el municipio respecto de esta misma actividad.; Presenta el trámite del Proyecto esquema OT. Aprobado por el Acuerdo 09 de 31 de agosto de 2011 adoptando polígonos de exclusión según el Acuerdo 017 CAR que regula la ronda hídrica del río Bogotá. Estudio y formulación UPR que permite el desarrollo como actividad industrial en los polígonos, distribución interna, espacios de la PTAR, relleno sanitario y demás actividades de saneamiento ambiental.; estudios futuro parque industrial dentro de la zona UPR; informe sobre la ejecutoria de los actos administrativos sancionatorios (ver cuadros hasta fl. 12710 y demás anexos fl. 12745).

Expediente No. 25000-23-27-000-2001-0479-01  
 Acumulados Nos. 2000-0428, 2001-0122, 2001-0343  
 Actor: GUSTAVO MOYA ÁNGEL Y OTROS  
 Acción Popular

- Fls. 12754 a 12798, el Municipio de Chocontá informa sobre las obras ejecutadas en saneamiento, certificación usos suelo, CD plano usos suelo y cauce del Río, copia presupuesto vigencia 2012.

Anexo 1. EMGESA, allega documentos requeridos, Informe fotográfico Embalse del Muña; reducción problemas sanitarios y de salubridad Municipio de Sibaté; relación empresas e industrias cercanas al embalse; alcance concesión otorgada por la CAR a Emgesa. (Resoluciones 603 /97 y 1014/98). Caudal río Bogotá bombeado embalse-Caudal Ecológico. Protocolo Compuertas Alicachín; Convenio EEB - EMGESA (ect. 97) caudales Chingaza-río Blanco; Convenio 171/07; Acuerdo de Cooperación 21-02-2011; Acuerdo 071/11 Departamento Nacional de Planeación.

Anexo 2, la CAR en respuesta a requerimiento auto 15-nov. 2012, marco legal: corresponde a la CAR diseñar un "Plan de Gestión Ambiental Regional" PGAR- dentro del marco de la Constitución Política, el Plan nacional de Desarrollo, el Plan de Desarrollo Departamental, Plan de Desarrollo Municipal, POT Departamental y POT municipal; así como de los Planes de Ordenamiento de Cuenca. Marco jurídico: CONPES 3320/04, Ley 99/93, Acuerdo CAR 043/06 y los Planes de Desarrollo 2006-2010 y 2011-2014, Acuerdo 071/07. Informe entrega PTAR municipios remitidos a la SISPD el 29 de octubre de 2010 anexo en 7 cd; Proyecto de Adecuación Hidráulica y recuperación ambiental río o componentes:-Ampliación PTAR Salitre, Adecuación hidráulica y mejoramiento ambiental, manejo integrado de la cuenca, administración y gerencia, recursos (ver págs. 42 y 43 de la respuesta); procesos adelantados por infracciones; actas entrega PTARS.

- Fls. 12799 a 12986, Municipio Zipaquirá da cumplimiento de los autos de 6 de septiembre/11 y 15 de noviembre/12, ordenados en oficio 9993 de 22 de noviembre de 2012 (184 folios y un CD), CD

Expediente No. 25000-23-27-000-2001-0479-01  
Acumulados Nos. 2000-0428, 2001-0122, 2001-0343  
Actor: GUSTAVO MOYA ÁNGEL Y OTROS  
Acción Popular

información POMCA río Bogotá; Información manejo zonas verdes, parques, campañas de limpieza en fuentes hídricas, acciones PSMV, residuos, cumplimiento PGIRS e indicadores de calidad del agua vigencia 2012, marco POMCA río Bogotá.

- Fl. 12987, EMCALI remite informe manejo biosólidos PTAR: manejo del producto y disposición del material. El tratamiento del biosólido se efectúa a través de: secado (solar) Sistema Green House: incremento de temperatura y aireación energía solar (efecto invernadero). Informa que actualmente se discute proyecto de norma entre el Ministerio de Agricultura y el Ministerio de Ambiente.
  
- Fl. 13002, la Agencia Nacional de Licencias Ambientales, ANLA, realiza precisiones respecto de cada uno de los requerimientos formulados: - modificación licencia ampliación y optimización PTAR Salitre , adelantar Proyecto PTAR CANOAS y EE a solicitud EAAB (Resolución 817 de 24 de julio de 1996) Fue modificada por resoluciones 577 de 12 de junio de 2000, 821 de 17 de agosto de 2000 y 362 de 8 de mayo de 2001, siempre circunscrita a la PTAR Salitre Sólo la Resolución 1929 de 1 de noviembre de 2007, a petición de la EAAB, el Ministerio de Ambiente, vivienda y Desarrollo Territorial modificó la Resolución 577/00 en el sentido de ajustar el Plan de Cumplimiento establecido en el artículo 2 para la ampliación a 8m<sup>3</sup>/s y la construcción de la segunda fase de la PTAR Salitre. En relación con la PTAR Canoas acorde con oficio remitido por la empresa de Acueducto y Alcantarillado de Bogotá, EAAB, No. 2420020121739 de agosto 2 de 2012, se están evaluando las diferentes alternativas para la ubicación por parte de esta empresa , pero aún no se tiene decisión definitiva sobre CANOAS, FUCHA y TUNJUELO, no se ha registrado solicitud alguna de modificación del proyecto o solicitud de licencia para la construcción de la PTAR Canoas porque la EAAB no ha adoptado la decisión técnica definitiva.

Expediente No. 25000-23-27-000-2001-0479-01  
Acumulados Nos. 2000-0428, 2001-0122, 2001-0343  
Actor: GUSTAVO MOYA ÁNGEL Y OTROS  
Acción Popular

Carece de competencia para el manejo de residuos sólidos -biosólidos.

- Fl. 13004 el Departamento Nacional de Planeación, anexa respuesta requerimiento oficio 9912/12, refiere el Acuerdo 071: descripción modelo financiero PTAR Canoas, estimación fuentes identificadas: Nación -Gobernación, Fase I y Fase II.
- Fls. 13025 a 13032, Jaime Castro, reflexiones sobre la naturaleza jurídica del pacto de cumplimiento; competencia del juez en acción popular: dar órdenes de dar o hacer, la solución técnica debe ser proferida por la autoridad administrativa competente mediante el acto administrativo correspondiente .
- Fl. 13033, el alcalde del Municipio de Nilo, estima que el requerimiento efectuado por el Consejo de Estado es improcedente porque no es municipio ribereño del río Bogotá.
- Fl. 13049, la empresa de servicios públicos de sopó - EMSERSOPO, refiere la implementación planes maestros de acueducto y alcantarillado; obras realizadas en el Municipio de Sopó, presupuesto destinado a saneamiento construcción y adecuación SAA.- Plano usos suelo.
- Fl. 13062, el Ministerio de minas y Energía da alcance respuesta oficio 9919, estado liquidación FNR, adjunta oficio Directora Regalías.
- Fl. 13070, el Ministerio de Ambiente, atiende requerimiento de acuerdo Memorando 8320-4-57783 y 8240-3-60214 Dirección Integral del Recurso Hídrico y Dirección de Asuntos Ambientales Sectorial y Urbana del Ministerio, para lo cual remite los citados memorandos.: reúso de agua Convenio 24/12 Univalle; metodología calcular caudal ecológico cuenca río Bogotá, cuenta con una versión preliminar sobre el Proyecto de Reglamentación del caudal ambiental el cual se estudiará una vez sea ajustada la metodología existente para calcular el caudal ambiental proyecto que adelanta la Universidad Nacional de Colombia; talleres socialización información sector hidroenergético; mapa zonas

Expediente No. 25000-23-27-000-2001-0479-01  
Acumulados Nos. 2000-0428, 2001-0122, 2001-0343  
Actor: GUSTAVO MOYA ÁNGEL Y OTROS  
Acción Popular

excluíbles de la Minería Sabana de Bogotá y áreas compatibles con la minería en la Sabana de Bogotá. La Resolución que debe reemplazar la 1197 /04 (declarada nula por el Consejo de Estado) se encuentra en revisión jurídica por parte del Ministerio, una vez aprobado será sometida a los comentarios de la ciudadanía a través de la página WEB.

- Fl. 13076, el Consorcio Canoas atiende requerimiento numeral 9 providencia octubre 29/12, informe actuaciones desplegadas: Pendiente de construir ITC 12 y extracción máquinas tuneladoras. Para su construcción se requiere: entrega predio INVIAS por la EAAB. Propone construcción pozo 65m de diámetro que recogería las funciones tanto de cribado como de succión en reemplazo del ITC12, pero se requiere actualizar el precio del costo directo de la época más ajuste por fórmula y el AIU del contrato, lo cual permite poner en funcionamiento el sistema mientras se construye la Estación Elevadora. A 24 de enero de 2013 no se ha tomado ninguna determinación al respecto, el acueducto no hizo entrega del predio, las máquinas están enterradas y el sistema sin posibilidad de ponerse en operación. Pendiente de liquidar el contrato. Agrega que las estructuras ITC 9 e ITC 11 No son indispensables ni necesarias para el correcto funcionamiento de la obra y para la puesta en funcionamiento del sistema en general. Adjunta acta reunión con la empresa y acta de terminación parcial contrato 1-01-25506-111-2009.
- Fls. 13173 a 13352, el Municipio de Chía, por medio de apoderada presenta informe al requerimiento: - Cumplimiento convenio Interadministrativo 00335 29-06-2011 y contrato de interventoría obras- sobre adquisición predios; estado actual operación PTAR y plan para contratar una segunda planta para el municipio; recibo PTAR Chía 1 de la CAR el 1 de noviembre de 2012, adelanta el Plan Mejoramiento y optimización PTAR CHIA 1 incluye obras de protección contra ola invernal, realiza una caracterización técnica para conocer el estado real de la PTAR CHIA

Expediente No. 25000-23-27-000-2001-0479-01  
Acumulados Nos. 2000-0428, 2001-0122, 2001-0343  
Actor: GUSTAVO MOYA ÁNGEL Y OTROS  
Acción Popular

1 pues se desconoce y no se recibió caracterización ni estado actual de la laguna; segunda PTAR informe rendido por la Secretaría de Planeación del Municipio de Chía en el cual se solicita a la CAR los estudios de detalle, informe sobre los usos del suelo sector Universidad de la Sabana, zona suburbana especial y zona de ronda de ríos. Describe POT Acuerdo 17 /00; informa las actuaciones desarrolladas para la mitigación de los riesgos por inundación en el sector de la Universidad de la Sabana; las actividades mantenimiento y recuperación río Bogotá, limpieza y mantenimiento manual Convenio CAR, Defensa Civil, Ejército Nacional, Policía Nacional, DEVINORTE y Municipio de Chía, retiro árboles forman tumbres y retiro de desechos.

- Fls. 13354 a 13398, memorial apoderado de la EAAB, anexa documento remitido por la Gerencia Corporativa del Sistema Maestro de la EAAB remitido a la interventoría de regalías indirectas del Departamento Nacional de Planeación, términos de referencia contratación Estación Elevadora de aguas residuales Canoas con el objeto de cumplir con el requisito exigido para el giro de los recursos FNR al Programa de Saneamiento del río Bogotá; pone a disposición las actas parciales contrato y posible acuerdo con el contratista para culminar las obras; informe técnico acciones ejecutada EAAB en cumplimiento orden impartida C. de E. levantamiento medida cautelar de fecha 4 de diciembre de 2012; respecto entrega predio INVIAS como éste cuenta con licencia de intervención del espacio público es viable continuar con la obra de saneamiento; no ha sido posible lograr acuerdo sobre la solución técnica de la propuesta del Consorcio Canoas del Pozo de 65 mts no es más económica. Sí se requiere la construcción de los ITC 9 y 11 para mayor ventilación y mantenimiento del túnel y además el ITC 9 se requiere como futura conexión para captar aguas residuales del sector, situación contemplada en los diseños presentados y no objetados por la interventoría; trámite ocupación cauce sector El

Expediente No. 25000-23-27-000-2001-0479-01  
 Acumulados Nos. 2000-0428, 2001-0122, 2001-0343  
 Actor: GUSTAVO MOYA ÁNGEL Y OTROS  
 Acción Popular

Charquito se radicó ante la CAR permiso ocupación cauce permita finalizar la estructura de entrega del TE y el interceptor T-C, a la espera respuesta CAR. El 16 de enero de 2013 la EAAB solicitó el informe sobre la actualización del trámite sin respuesta todavía. Pone de presente que la empresa no ha realizado obras por fuera de lo permitido por la autoridad judicial que puedan impedir fallo de segunda instancia.

- Fls. 13418 a 1424, la Gobernación de Cundinamarca, presenta informe epidemiología áreas que circundad la cuenca del río Bogotá y sus afluentes
- Fl. 13663 a 13669 Acta de reunión de comité de Verificación del Tribunal Administrativo de Cundinamarca.
- Fl. 13671, la Contraloría General de la República, anexa resultados auditoría de gestión sobre el río Bogotá intersectorial y articulada.
- Fls. 13672 a 13704, memorial Ministerio de Minas y Energía. Anexo 1 Auditoría Especial sobre la gestión río Bogotá, intersectorial y articulada. La Contraloría presenta la problemática general del río Bogotá, relaciona los documentos CONPES 3320 y la Política Nacional del Recurso Hídrico. Concluye: - Incumplimiento de las políticas es generalizado; -No se ha definido priorizaciones; no se cumple el PSMV (Resolución 1433/04 y 2145/05); falta armonización de los instrumentos regulatorios del recurso hídrico; falta coherencia en los planes de desarrollo municipales. Se hace necesario aplicar el instrumento denominado "caudal ecológico y ambiental" para garantizar la sostenibilidad de la cuenca pues en gran parte del país los derechos de agua se encuentran otorgados.

Propuesta: 1.- Gobernanza del recurso hídrico en la cuenca, entendido como un proceso formal e informal de interacción entre actores para la conducción de una sociedad. Integrado por reglas y procedimientos que configuran un marco institucional en el cual los diversos actores tienen que operar. Permitiría suplir la inexistencia de un organismo de la cuenca

Expediente No. 25000-23-27-000-2001-0479-01  
Acumulados Nos. 2000-0428, 2001-0122, 2001-0343  
Actor: GUSTAVO MOYA ÁNGEL Y OTROS  
Acción Popular

con suficiente sustento legal para gerenciar la misma.

En minería, advierte sobre los pasivos ambientales y el riesgo de incrementarlos por la minería que se desarrolla a lo largo de la cuenca, que además origina conflictos por contaminación por la explotación o usos del suelo lo cual se refleja en el POT de algunos municipios; falta coherencia entre la normatividad ambiental y la normatividad minera lo cual genera diferencia de criterios que a su vez da lugar a desconfianza entre los empresarios mineros y la población en general, así como en la necesidad de realizar acciones correctivas y preventivas; no existen estudios evalúen el impacto de la actividad minera y su incidencia en la calidad del agua (ejemplo la minería a cielo abierto impacta aire y agua); se trata de una minería de subsistencia que plantea de por sí una problemática social compleja.

- Fls. 13717 a 13756, la señora María José Páez Díaz, coadyuvante, reitera argumentos coadyuvancia, incorpora acta visita técnica realizada por el comité de verificación creado en primera instancia, propone la alternativa de Carboneras como de menor impacto ambiental Municipio de Soacha.
- Fls. 13769 a 13772, Acta Comité Verificación.
- Fls. 13847 a 13871, Acta original visita 13 febrero de 2013
- Fl. 13938, el Municipio de Chocontá presenta respuesta al requerimiento oficio 537.

Expediente No. 25000-23-27-000-2001-0479-01  
Acumulados Nos. 2000-0428, 2001-0122, 2001-0343  
Actor: GUSTAVO MOYA ÁNGEL Y OTROS  
Acción Popular

### VIII.3. RECURSOS DE APELACIÓN

- Fls. 6540 a 6578, memorial suscrito Procurador Tercero Judicial II Administrativo, sustenta recurso apelación.
- Fls. 6587 a 6588, Sociedad Stanton & Cia. S.A., recurso apelación adhesivo.
- Fls. 6611 a 6617, memorial Ministerio de Agricultura y Desarrollo rural, sustenta recurso apelación.
- Fls. 6619 a 6622, memorial ALPINA PRODUCTOS ALIMENTICIOS S.A. y otros, recurso de apelación sentencia.
- Fls. 6626 a 6637, la sociedad Bogotana de Aguas sustenta el recurso de apelación.
- Fls. 6638 a 6642 sustenta recurso apelación ACURTIR.
- Fls. 6652 a 6657, memorial Jorge Enrique Cuervo Ramírez, sustenta recurso apelación.
- Fls. 6658 a 6706, la CAR sustenta recurso de apelación. Adjunta documentos poder y Plan de Acción Trienal de la Car (fls.6707 a 6960).
- Fls. 7028 a 7030, memorial Sociedad Stanton & Cía. S.A. sobre los recursos interpuestos contra la sentencia y su complementaria.
- Fls. 7031 a 7033, memorial sustenta recurso Sociedad Stanton & CIA. S.A.
- Fls. 7034 a 7035, memorial municipio Mosquera recurso de apelación.
- Fls. 7036 a 7037, Papeles y Corrugados Andina S.A., respecto a los recursos interpuestos en contra de la sentencia de 25 de agosto de 2004.
- Fls. 7038 a 7042, memorial Municipio de Sopó sustenta recurso de apelación.
- Fls. 7043 a 7049, memorial Municipio de Cota sustenta recurso apelación.
- Fls. 7056 a 7071, memorial Sara Mariela Párraga, recurso apelación sentencia.
- Fls. 7072 a 7085, memorial procurador judicial amplía razones memorial recurso apelación.

Expediente No. 25000-23-27-000-2001-0479-01  
Acumulados Nos. 2000-0428, 2001-0122, 2001-0343  
Actor: GUSTAVO MOYA ÁNGEL Y OTROS  
Acción Popular

- Fls. 7086 a 7124, memorial DNP-FNR, apelación sentencia.
- Fls. 7129 a 7135 sustenta recurso apelación Municipio de Cajicá.
- Fls. 7151 a 7161 sustenta recurso apelación Ministerio de Comercio Industria y Turismo.
- Fls. 7175 a 7184, apelación Municipio Gachancipá, anexos fls. 7185 a 7187.
- Fls. 7188 a 7209, apelación Alfonso Pérez Preciado.
- Fls. 7386 a 7417, Fundación Amigos del Planeta amplía recurso de apelación, adjunta en 59 folios el estudio denominado "Planteamiento de alternativas para el mejoramiento de la calidad ambiental del Embalse del Muña, Universidad de los Andes-EMGESA-EEB-EAAB, 2003" resumen ejecutivo; en 24 folios estudio "Evaluación de costos de las Plantas de Tratamiento de aguas residuales del proyecto de saneamiento del río Bogotá, Carlos Alberto Giraldo, mayo de 2003"; en 27 folios Propuesta de estudio de la Universidad de los Andes EMGESA, EAAB y EEB denominada "Definición y valoración técnica de alternativas de sectorización, operación y manejo y modelación hidrodinámica y de calidad del agua del Embalse del Muña, Propuesta técnica y económica, Universidad de los Andes, octubre de 2004"; estudio denominado monitoreo y diagnóstico de la calidad del río Bogotá analizando aspectos biológicos y de sus impactos sobre la salud" contratado por la EAAB a la Universidad Javeriana, no se anexa solicita requerirlo. Fotocopia en 10 folios de los derechos de petición elevados ante la CAR y el Ministerio de Ambiente, Vivienda y Desarrollo Territorial por la Fundación Amigos del Planeta y dos respuestas recibidas. Fotocopia del Decreto No. 1449 expedido por el Presidente de la República en tres folios; 4 folios requiriendo a las autoridades ambientales y de control sobre si el decreto se encontraba vigente; 7 folios de respuesta a los referidos requerimientos que ponen de presente la vigencia del decreto 1449; respuesta del MAVT sobre el derecho de petición vigencia del decreto 1449: respuesta del

Expediente No. 25000-23-27-000-2001-0479-01  
Acumulados Nos. 2000-0428, 2001-0122, 2001-0343  
Actor: GUSTAVO MOYA ÁNGEL Y OTROS  
Acción Popular

DAMA en 1 folio mismo requerimiento; respuesta de la CAR en un folio; respuesta en 26 folios Acuerdo 16 de 1998 CAR. En 45 folios respuesta Resolución 583 de 1999 MA y en 42 folios Resolución 1869 de 1999 MMA; en 67 folios Política Nacional para humedales interiores de Colombia, MMA, julio 2002; en dos folios derecho petición y en 4 folios respuesta del Ministerio del Medio Ambiente Documento Técnico Interinstitucional sobre el manejo de los humedales del distrito Capital entregado a la Fundación en 12 folios, sin fecha. (fls. 7418 a 7707).

- Fls. 7709 a 7745 memorial sustenta recurso de apelación la EAAB por medio de apoderado.
- Fls. 7246 a 7773, recurso de apelación Ministerio de Minas y Energía.
- Fls. 7774 a 7780, apelación, anexa documentos acreditación representación legal, fls. 7781 y 7782.
- Fls. 7783 a 7790, solicitud de intervención de la sociedad Constructora Palo alto y Cía S. en C.
- Folio 7801 a 7809, memorial en 9 folios alcalde Municipio de Zipaquirá, recurso de apelación.
- Fls. 7866 a 7873, el apoderado de la EEB adhiere apelación interpuesta sentencia primera instancia.
- Fl. 8869, memorial apoderado de Alpina, ETERNIT, PELDAR entre otras, solicita declarar la nulidad de la vinculación al proceso de la referencia de las industrias representadas, de no proceder se exonere a las sociedades Cristalería Peldar S.A. y Refisal S.A. pues no se resolvieron las excepciones propuestas y que se revoque la condena en costas.
- Fl. 9094 informe secretarial memorial apoderada aseguradora Colseguros S.A. pone de presente que la sentencia en la parte considerativa de la sentencia pág. 442 acoge la excepción presentada y en la parte resolutive numeral 7 pág. 493 niega el llamamiento en garantía razón por la cual la sociedad se encuentra desvinculada del proceso la sentencia no fue apelada por la entidad asegurada luego la decisión se encuentra en firme.

Expediente No. 25000-23-27-000-2001-0479-01  
Acumulados Nos. 2000-0428, 2001-0122, 2001-0343  
Actor: GUSTAVO MOYA ÁNGEL Y OTROS  
Acción Popular

#### **VIII.4. AUDIENCIA PREVIA A FALLO**

Se verificó el 14 de noviembre de 2012, una vez fueron citadas las partes; se adjuntó al proceso la grabación de la diligencia en el CD. La diligencia se desarrolló con la intervención de los representantes de las entidades que en su orden se relaciona a continuación:

La Gobernación de Cundinamarca, el Ministerio de Vivienda, Ciudad y Territorio, la Empresa de Acueducto y Alcantarillado de Bogotá -EAAB, la Corporación Autónoma Regional -CAR, la Empresa de Energía de Bogotá -EEB, EMGESA S.A., el Municipio de Soacha; la Corporación Girardotemos, el Procurador Delegado para la Conciliación Administrativa y el Municipio de Villapinzón.

Instalada la audiencia por la Doctora Elizabeth García, Presidenta de la Sección Primera del Consejo de Estado concedió la palabra al Doctor Marco Antonio Velilla, Consejero Ponente, quien puso de presente que la diligencia de audiencia de la acción popular del río Bogotá tenía por objeto tratar de resolver un tema técnico y con el mismo propósito se constituyeron además del estudio del expediente, grupos de reflexión con el acompañamiento de la Contraloría General de la República y la Procuraduría General de la Nación. Así se han trabajado los temas técnico, financiero y jurídico-financiero, sin comprometer a las personas que en ellos intervinieron, las cuales permitieron hacer los requerimientos a las instituciones involucradas en el proceso, los mismos que, en su gran mayoría, han sido respondidos y que se espera complementar con la

Expediente No. 25000-23-27-000-2001-0479-01  
Acumulados Nos. 2000-0428, 2001-0122, 2001-0343  
Actor: GUSTAVO MOYA ÁNGEL Y OTROS  
Acción Popular

información presentada en la audiencia para definir el proceso. Solicitó igualmente el Consejero Ponente precisión y, reiteró la importancia de los aportes que se hicieran en la audiencia como fundamento de la decisión, una vez leídos los alegatos de conclusión.

#### **VIII.5.INTERVENCIONES**

##### **VIII.5.1.- EL DEPARTAMENTO DE CUNDINAMARCA**

El Departamento de Cundinamarca puso de presente que ha venido cumpliendo con las obligaciones impuestas en la sentencia de primera instancia, de conformidad con sus competencias (adjunta igualmente documento soporte).

Destacó las actividades desarrolladas así:

- Por la Secretaría de Salud: el control de plagas, el levantamiento de información sobre morbilidad, y demás factores de riesgo para la salud.
- Por Planeación Departamental: directrices impartidas por la Secretaría de Planeación para la elaboración de los planes de ordenamiento territorial, así como la gestión sobre los usos del suelo en 12 municipios.
- Por la Secretaría de Agricultura: Se expidió el Decreto 064/10, relacionado con las Plantas de beneficio animal: así se cuenta con 16 plantas regionales en funcionamiento; Igualmente expidió

Expediente No. 25000-23-27-000-2001-0479-01  
Acumulados Nos. 2000-0428, 2001-0122, 2001-0343  
Actor: GUSTAVO MOYA ÁNGEL Y OTROS  
Acción Popular

la Circular 043 UMATAS, que establece la normativa y acciones a desarrollar.

- Por las Empresas Públicas del Departamento:

a) Saneamiento Básico. Ha sido la entidad gestora del Plan Departamental de Aguas; cofinancia proyectos inicialmente para Obras Públicas, alcantarillado y acueducto. Una vez se crean los PAP, se han hecho inversiones en los municipios de la Cuenca.

- Se ha destinado la suma de \$8.652 millones de pesos en pre-inversión para los municipios de Chocontá, Guasca, La Mesa, Sopó, Sesquilé, entre otros.

- En acueducto y alcantarillado, ha invertido la suma de 119 mil millones, lo cual ha beneficiado a 16 municipios.

b) Saneamiento básico rural: Ha invertido la suma de \$1.376 millones de pesos en construcción de unidades sanitarias en los municipios de Anolaima, San Antonio de Tequendama y el 90% ya están ejecutadas.

Manejo de Residuos Sólidos: Se han entregado \$1.376 millones de pesos a cinco municipios.

- Por la Beneficencia: se ha entregado la suma de \$8.218 millones de pesos en cuanto al componente institucional del PDA de 2012, se apropió la suma de mil millones de pesos para el diagnóstico de los operadores de acueducto y aseo, así como para

Expediente No. 25000-23-27-000-2001-0479-01  
Acumulados Nos. 2000-0428, 2001-0122, 2001-0343  
Actor: GUSTAVO MOYA ÁNGEL Y OTROS  
Acción Popular

conocer situación actual y tomar las medidas correctivas del caso.

Componente Ambiental: CORPOGUAVIO y CORPORINOQUIA realizan conversaciones con la CAR para que se vincule al PDFA con miras a aunar esfuerzos para elaborar el Plan Departamental de Aguas, en el cual se incluyan mayores inversiones para los municipios ubicados en jurisdicción de la CAR.

Para el año 2012 aspiran contar con recursos para adelantar los proyectos, otros ya han sido viabilizados por ventanilla y otros autorizados para contratar en varios municipios de la Cuenca.

El Departamento asumió por virtud del Acuerdo de 21 febrero de 2011, hacer un aporte de \$3.180 millones de pesos para la PETAR Canoas, no incluyen los recursos del Sistema General de Participaciones de Soacha por la falta de inicio de obras, razón por la cual estos ingresos fueron destinados a otras inversiones. Sin embargo, a través del Fondo Nacional de Regalías se consiguieron recursos para la construcción de los colectores en Soacha, se gestionó el proyecto y el 8 de octubre de 2012 se adjudicó el contrato; en los próximos días se construirán los colectores para conducir las aguas a la PTAR al sitio correspondiente.

Expediente No. 25000-23-27-000-2001-0479-01  
Acumulados Nos. 2000-0428, 2001-0122, 2001-0343  
Actor: GUSTAVO MOYA ÁNGEL Y OTROS  
Acción Popular

#### **VIII.5.2. MINISTERIO DE VIVIENDA, CIUDAD Y TERRITORIO**

Manifestó que realizará una breve intervención con el objeto de hacer un resumen de las actividades adelantadas por el Gobierno Nacional y desarrolladas en el marco del proyecto:

El CONPES 3177, priorizó la cuenca del río Bogotá; en el año 2004, en la sentencia de primera instancia se establecieron obligaciones para el saneamiento del río Bogotá, al Gobierno Nacional y a otras entidades públicas. El CONPES 3320 estableció la Estrategia para el río Bogotá. Igualmente, la Cuenca del río Bogotá ha sido priorizada en las leyes del Plan de Desarrollo: 2006-2010 y 2010-2014, comprende este proyecto al Distrito Capital y a los 41 municipios de la Cuenca. El Pacto de Cumplimiento incluyó la alternativa de construcción de la PTAR Canoas acorde con los estudios realizados desde el año 2000 y con soporte en el Acuerdo 171, suscrito por la EAAB y la CAR: Construcción PTAR Canoas y Estación Elevadora; la Agencia Nacional de Licencias Ambientales tramita Licencia: 15-X-2009 EAAB: solicita modificación licencia dos componentes ampliación PTAR Salitre y construcción PTAR CANOAS; posteriormente se produjo el cierre financiero: El Acuerdo aseguraba 1ª fase y 2ª fase. Acciones: Gobierno Nacional y el FNR harían un aporte de \$120 mil millones para la primera Fase (Acuerdo 071 de 2011); Por el Convenio 907 de diciembre de 2011, se acordó financiar la Estación Elevadora en CANOAS y su operación a cargo de EMGESA. (Acuerdo 03 de 2011 Canoas).

Expediente No. 25000-23-27-000-2001-0479-01  
Acumulados Nos. 2000-0428, 2001-0122, 2001-0343  
Actor: GUSTAVO MOYA ÁNGEL Y OTROS  
Acción Popular

En diciembre de 2011 se comprometieron recursos y vigencias futuras. El DC tuvo que cumplir requisitos técnicos, se tramitó la adquisición del lote.

Estos recursos son de destinación específica y para su desembolso se requiere presentar el proyecto técnico y si se modifica la destinación de los recursos ellos tendrían que volver al presupuesto nacional.

Se requería para ello, constituir el encargo fiduciario. El Ministro Vargas se declaró impedido y se designó al Ministro de Ambiente y Desarrollo Sostenible. Se hizo un desembolso por 21 mil millones de pesos y un saldo contra avance de obra quedando como reserva presupuestal y para el 2013 treinta mil millones para asegurar el cierre financiero. (Presentación del Ministerio de Vivienda), recursos sujetos a la forma como está planteada la solución técnica.

#### **VIII.5.3. LA EMPRESA DE ACUEDUCTO Y ALCANTARILLADO DE BOGOTÁ**

A través de su apoderado, se refirió a tres temas puntuales en este estado del proceso, no sin antes recordar que los informes relacionados con las obras ejecutadas desde la judicialización y con las observaciones técnicas hechas por la actual administración de Bogotá, reposan en el expediente. Igualmente se harán observaciones en la oportunidad procesal de alegatos de conclusión.

Expediente No. 25000-23-27-000-2001-0479-01  
Acumulados Nos. 2000-0428, 2001-0122, 2001-0343  
Actor: GUSTAVO MOYA ÁNGEL Y OTROS  
Acción Popular

Esta acción popular es paradigma de las acciones populares en Colombia por los derechos colectivos invocados como vulnerados, los aspectos procesales sobre los cuales se han tomado decisiones que a su vez han sido objeto de debate y análisis por la Academia; los temas procesales y sustanciales tratados en estos términos van a marcar un hito de cómo se van a enmarcar estas acciones que hacen parte de un arsenal de herramientas constitucionales. Refiere una publicación de la Universidad del Rosario que hace relación a este proceso y que considera que más allá de una Política Pública, la sentencia de primera instancia modificó el concepto de los derechos colectivos, con efectos económicos relevantes.

Destacó asimismo el concepto sobre la concurrencia en la producción del daño y la responsabilidad, atribuida a varias entidades públicas. Ello para destacar que finalmente quienes van a responder son los ciudadanos frente a los altos costos, razón por la cual debe hacerse una ponderación y proporcionar esas responsabilidades; la apelación que se dio en el año 2005 hacía referencia a los tiempos y a las cargas financieras sin dejar de comentar que ya hay hechos superados como el interceptor Tunjuelo-Canoas y del esquema técnico inicialmente pactado, de acuerdo con las observaciones técnicas de la actual administración. Son tantas las autoridades involucradas que el papel del juez será la de coordinar su ejecución.

En este esfuerzo por definir el grado de corresponsabilidad de las entidades y que afecta el

Expediente No. 25000-23-27-000-2001-0479-01  
Acumulados Nos. 2000-0428, 2001-0122, 2001-0343  
Actor: GUSTAVO MOYA ÁNGEL Y OTROS  
Acción Popular

bolsillo de los ciudadanos, el Convenio 171 tiene importantes elementos: - Forma de distribuir las cargas, conducta de las partes involucradas y su responsabilidad, no hay duda de que se trata de un problema catastrófico.

Cuando la sentencia dice que se vuelva al estado de cosas a su estado anterior, entiende que es descontaminar el río Bogotá para lo cual se requiere hacer una reflexión de carácter histórico. Bogotá se fundó entre dos quebradas. En la Legislación de Indias están las instrucciones de por qué allí debía fundarse la ciudad, el agua debía fluir hacia las dos quebradas y de ellas hacia el río Bogotá. La responsabilidad es de la CAR, la EAAB, del DC es de todos y deja constancia de que las entidades han hecho esfuerzos y que si no se han obtenido resultados no es por falta de voluntad, sino por falta de recursos.

#### **VIII.5.4. LA CORPORACIÓN AUTÓNOMA REGIONAL**

Señaló que desea realizar algunas reflexiones sobre el fallo de primera instancia y comentar ciertas de las acciones emprendidas por la CAR, puesto que para la actual administración la descontaminación ocupa un primer lugar. Encuentra necesario ir a las causas y entonces refiere: 1.- Aguas residuales domésticas urbanas, rurales, industriales, mineras y agropecuarias. Para ello la CAR ha querido fortalecerse en su accionar como vigilante del control y seguimiento de las actividades que adelantan los particulares que afectan los recursos naturales.

Expediente No. 25000-23-27-000-2001-0479-01  
Acumulados Nos. 2000-0428, 2001-0122, 2001-0343  
Actor: GUSTAVO MOYA ÁNGEL Y OTROS  
Acción Popular

Aguas residuales domésticas: Empresas prestadoras tienen la obligación legal de dar tratamiento a las aguas residuales de su respectiva jurisdicción, por lo tanto cada una deberá asumir la responsabilidad que les corresponde. Hoy 21 municipios operan las plantas y la CAR ejerce el control y vigilancia así como la labor de cofinanciar los proyectos en Villapinzón y Gachancipá que no cuentan con PTAR e inversiones por \$41 mil millones de pesos para cofinanciar con recursos provenientes de las tasas retributivas y con recursos propios; pero la CAR sigue preocupada porque no hay una política nacional clara, sólo con señalar que vía tarifa están dadas las soluciones sin tener en cuenta que la mayoría de municipios tiene categoría sexta y nunca van a contar con los recursos necesarios. Tampoco hay claridad por parte de los Ministerios de Hacienda y Vivienda, por el contrario, hay leyes contradictorias. La Ley 99 de 1993, exige el control sobre los vertimientos pero a los municipios los autoriza a realizar planes de saneamiento y por lo tanto, a que sigan contaminando. En relación con los plazos, son los previstos en los procesos de Planificación y en el Convenio 171, empréstito Banco Mundial primer trimestre 2013, adjudicado con inversiones exclusivas de la CAR pero ello implica ser socio del municipio para el manejo de aguas residuales cuando es responsabilidad del municipio, contrariando la norma. Se habla del horizonte de la construcción de la PTAR Canoas para 10 años y la solución no se puede dilatar ya que si se le exige a los municipios, no se puede esperar menos del Distrito Capital que cuenta con recursos.

Expediente No. 25000-23-27-000-2001-0479-01  
Acumulados Nos. 2000-0428, 2001-0122, 2001-0343  
Actor: GUSTAVO MOYA ÁNGEL Y OTROS  
Acción Popular

Sobre el tema de mataderos a cargo de las entidades territoriales, tampoco se ve una política clara desde el Gobierno. También estima que vale la pena tener en cuenta el tema aguas residuales curtiembres, preocupa la obligación contenida en la sentencia y no podría financiar una actividad económica privada que se apoya a través del IDEA Producción más limpia, hacer productivos los residuos y disminuir los efectos ambientales pero exigir a la CAR una infraestructura para producción más limpia como autoridad ambiental es una orden que debe revisarse.

En cuanto al plazo de cuatro meses para el control de la actividad minera, no es posible lograr la restauración, porque el término para ello lo dan las condiciones morfológicas del terreno.

La sentencia ordena una sola red hidrometeorológica, la CAR tiene una a la cual se le han invertido altos recursos, ha sido importante para la toma de decisiones y seguimientos puntuales respecto de las empresas de la cuenca alta, entregar la red al IDEAM los pone en dos situaciones difíciles posible detrimento patrimonial y no contar con herramienta.

No es función de la CAR reubicar familias en zonas de riesgo o de ronda porque ello es una función policiva; en el CONPES 3320 se reconoce esta función a los Ministerios.

Reiteró la voluntad de la entidad en trabajar por el tema. A través de seguimiento a los POT, a los modelos de

Expediente No. 25000-23-27-000-2001-0479-01  
Acumulados Nos. 2000-0428, 2001-0122, 2001-0343  
Actor: GUSTAVO MOYA ÁNGEL Y OTROS  
Acción Popular

desarrollo y al crecimiento, pretende que ellos no se realicen con desconocimiento de los pasivos ambientales.

La Ley del Plan de Desarrollo estableció con destinación específica el 7.5% sobre el recaudo del predial de Bogotá para la adecuación hidráulica del río. Si bien ya fue adjudicado el primer tramo, también hay que financiar las PTAR Salitre y Canoas, lo que implica amarrar a la Corporación.

#### **VIII.5.5. LA INTERVENCIÓN HECHA POR LA EMPRESA DE ENERGÍA DE BOGOTÁ**

Se preguntó, en primer lugar, por qué fue vinculada a este proceso. Señaló, al respecto que, en primer lugar, la represa del Muña es un activo que fue construido por la empresa, pero luego fue enajenado a EMGESA. Tampoco contamina; por el contrario, en el proceso de turbinaje, lo que hace es descontaminar. Inicialmente, la empresa fue vinculada y condenada en proceso conocido por la justicia ordinaria, decisión que fue ratificada por el Tribunal en sentencia que fue honrada y cumplida a cabalidad en el Embalse del Muña y la población de Sibaté. Posteriormente, fue vinculada al proceso Moya Ángel, conscientes de que fueron propietarios del Embalse y por lo tanto cabría una responsabilidad por el uso del embalse. Para examinar la contaminación del Río contrataron un grupo de expertos y en el año 2003 dieron una fórmula acogida en su totalidad y en el 2005 se ajustó y hoy es un pacto de cumplimiento con EMGESA juicioso y con respaldo científico suficiente que hace que hoy el EMBALSE cuente con un espejo de agua

Expediente No. 25000-23-27-000-2001-0479-01  
Acumulados Nos. 2000-0428, 2001-0122, 2001-0343  
Actor: GUSTAVO MOYA ÁNGEL Y OTROS  
Acción Popular

recuperado en conjunto con EMGESA, la EAAB y la EEB y tuvo un logro positivo. Se continúa con la labor de mantenimiento, en eso se está y hay preocupación por los temas ambientales, siempre estarán dispuestos a honrar la sentencia por su importancia en el tema ambiental; en lo que concierne a la empresa continúan cumpliendo con el pacto y conscientes de la responsabilidad histórica que les corresponde. También como lo señaló el Dr. Medellín esta sentencia va a fijar un cierto norte en el tema jurisprudencial y será una orientación para todos los juzgadores de Colombia en este tema, a la espera por lo tanto de estas decisiones para hacer conciencia del tema ambiental que es trascendental y precisar que la empresa tiene que ser consciente de ello.

Hoy la EEB no es dueña y por lo tanto deberá ser tenido en cuenta para efecto de la proporcionalidad en las decisiones. Agradece el espacio de audiencia y manifiesta que la EEB está presta a honrar la sentencia una vez sea expedida.

#### **VIII.5.6. EMGESA**

A través de su representante legal, expresó su agradecimiento por permitirle compartir reflexiones en el complejo proceso de descontaminación del río Bogotá. La mejor forma de encontrar la solución es conocer su origen y el problema mismo. El origen es el no tratamiento de aguas que se vierten a lo largo de toda su cuenca. Como EMGESA no vierte, no contamina. Opera desde 1997 todos los activos del río. En la gráfica quiere destacar su

Expediente No. 25000-23-27-000-2001-0479-01  
Acumulados Nos. 2000-0428, 2001-0122, 2001-0343  
Actor: GUSTAVO MOYA ÁNGEL Y OTROS  
Acción Popular

ubicación, y destaca que en su cuenca baja al final del tubo, recibe las aguas contaminadas. Insiste en que la contaminación es de aguas y EMGESA solo las utiliza en su cuenca baja. Hoy, al hacer un análisis de lo que sucede en el Río, el 85% de la contaminación proviene de la cuenca media con 185 mil toneladas de descarga. Está vinculado porque administra el Embalse pero mientras no haya solución tampoco el embalse la tendrá porque las aguas se utilizan después de que viene del cauce. El proceso de generación es un proceso limpio pero si se encuentran afectados sus empleados y las máquinas por localidad del agua. Han sido vinculados en la AP Moya Ángel por el embalse, nunca por el tema de contaminación del río Bogotá y hoy es esta la problemática. El fallo de primera instancia recoge el pacto de cumplimiento presentado por EMGESA. En cumplimiento del mismo han desecado el 15% del embalse, construido el dique para separar las colas del embalse, se retiraron toneladas de buchón, disminuido 99.96% la afectación por zancudos y se ha realizado el monitoreo de calidad del agua. El único punto con oxígeno disuelto es el Embalse del Muña. FOTO antes y hoy.

1ª- Conclusión, EMGESA no ha estado vinculado por contaminación del río Bogotá sino por el Embalse y cumplió con lo acordado en Pacto de Cumplimiento.

2ª- Se utiliza el agua del embalse y se devuelve el agua al río Bogotá a través del sistema Paraíso-Guaca que genera el 8% de la demanda nacional de energía; sí utiliza el agua para generar energía, pero ante la imposibilidad de controlar la calidad del agua son un

Expediente No. 25000-23-27-000-2001-0479-01  
Acumulados Nos. 2000-0428, 2001-0122, 2001-0343  
Actor: GUSTAVO MOYA ÁNGEL Y OTROS  
Acción Popular

doliente más, las soluciones que se apliquen tienen que ser compatibles con la generación de energía porque se podría generar un problema eléctrico, así lo recoge el Conpes 3320. Siempre han buscado hacer compatible la generación de energía con el tratamiento.

3ª- Ha habido mucha información, hoy la solución que se ha planteado es la ampliación PTAR Salitre, la construcción de interceptores y de una planta de tratamiento con la necesidad de una Estación Elevadora porque los interceptores llegan a 40 mts sobre el nivel del suelo entonces si se instala sobre esa superficie se requiere de ella; no es cierto que sea únicamente para la energía sino que forma parte de la solución, así se hizo el acuerdo en 2011 y se recogió la suma de \$332 mil millones de pesos y que no hacen parte de la tarifa. EMGESA va a hacer el mantenimiento de la Estación Elevadora y a contribuir con la suma de \$84 mil millones de pesos con lo que se compatibiliza este propósito. Esta solución ya está avanzada, se han hecho los interceptores ya previstos y estas obras hay que hacerlas compatibles. De lo contrario es partir de cero con nuevos estudios para establecer la solución, por lo tanto ella es una solución óptima.

Reflexiones finales: EMGESA, reitera, no aparece vinculada en la contaminación del río Bogotá, por ello no debería ser condenada. No existe nexo de causalidad entre el daño y la conducta de EMGESA quien ha cumplido el fallo y ahora no se le pueden imponer cargas con su aporte de los 84 mil millones de pesos y su operación, no puede condenársele ni ser declarada responsable. No son

Expediente No. 25000-23-27-000-2001-0479-01  
Acumulados Nos. 2000-0428, 2001-0122, 2001-0343  
Actor: GUSTAVO MOYA ÁNGEL Y OTROS  
Acción Popular

parte de las acciones iniciadas, por lo tanto, solicita se confirme la decisión de primera instancia.

#### **VIII.5.7. EL MUNICIPIO DE SOACHA**

A través de su representante judicial indicó que a raíz de la problemática del río Bogotá y el fallo del Tribunal Administrativo de Cundinamarca, para este propósito a través de gestiones con el Dpto. en el año 2000 logró la elaboración Plan Maestro del municipio, cofinanciado por el Departamento el municipio y la EAAB; desde entonces se ha venido construyendo el sistema de alcantarillado teniendo como referencia este plan maestro. El Municipio se obligó a construir el sistema TIBANICA, red principal que hace parte de la cuenca sector oriental de bastante carga de aguas servidas que contribuyen con la contaminación. Cofinanciado con el Departamento y el Ministerio de Ambiente 2000-2001 y el Municipio. Entonces dio cumplimiento a este punto. Prestar colaboración con el apoyo de otras entidades involucradas para el desarrollo de proyectos con el fin de descontaminar el río Bogotá, entre ellas la de facilitar a través de la declaratoria de utilidad pública los corredores para el sistema Canoas y el predio para la construcción de la PTAR Canoas, esto se logró y el trámite fue realizado. De otra parte, acorde con estos compromisos, la administración de Soacha para resolver el problema ha venido desarrollando el sistema de redes de aguas lluvias y aguas hervidas paralelas al trazado Tunjuelo Canoas para ser conducidas a la planta de tratamiento. En el esquema se puede ver la infraestructura ya construida,

Expediente No. 25000-23-27-000-2001-0479-01  
Acumulados Nos. 2000-0428, 2001-0122, 2001-0343  
Actor: GUSTAVO MOYA ÁNGEL Y OTROS  
Acción Popular

redes principales y red final TIBANICA a entregar después de Tunjuelo-Canoas. Tibanica entregaba al Tunjuelo y éste al río Bogotá. También se han construido redes principales dirigidas al interceptor T-C que inicialmente caían al río Soacha y a su vez al río Bogotá. En lo que respecta a la cuenca occidental se han construido una serie de redes principales conducidas por el mismo trazado T-C inicialmente caían a un humedal y luego al río Bogotá. Con estos sistemas se pretende dirigirlas al sistema T-C. Destaca que se han hecho con escasos recursos pero ante todo con el interés de proteger el medio ambiente. Con recursos propios y con la cofinanciación del departamento. Hacia 2006 (proyectos del cuadro) y 2006-2010, los proyectos superan los once mil millones de pesos encaminados a entregar aguas servidas T-C y luego a la PTAR Canoas para ser descontaminadas.

Es muy importante aclarar que el sistema T-C es un sistema que fuera de que conduce aguas hervidas del DC y las del Municipio de Soacha las conduce para ser entregadas a la PTAR Canoas. La PTR Canoas contempla los caudales del Municipio de Soacha. Por lo anterior y haciendo un resumen de los recursos con que cuenta el municipio se nota el inmenso esfuerzo de realizar obras para dar cumplimiento al fallo que obliga a las partes con este fin. Hace un resumen de un caso presupuestal de 2012, costos contra ingresos para señalar que tan solo le quedan \$500 millones de pesos del presupuesto para reparaciones de alcantarillados y acueducto a cargo del municipio, cifra ínfima, que de ser excluidas las aguas

Expediente No. 25000-23-27-000-2001-0479-01  
Acumulados Nos. 2000-0428, 2001-0122, 2001-0343  
Actor: GUSTAVO MOYA ÁNGEL Y OTROS  
Acción Popular

del Municipio de Soacha sería imposible para el municipio cumplir con el objetivo de descontaminar el río Bogotá.

#### **VIII.5.8. EL REPRESENTANTE DE LOS USUARIOS DEL RÍO BOGOTÁ**

Con fundamento en el Decreto 2811 de 1974, reclamó para los usuarios y residentes del río sometidos a un riesgo aceptable a vivir y compartir los riesgos del río Bogotá. En su condición de miembro del Comité de vigilancia como se han llevado las cosas, no se resolverá el problema si no se toman las medidas. En 1992 se instauró la acción, 20 años después el Río sigue con las consecuencias desastrosas. No se están cumpliendo los propósitos de la Constitución Política y la ley. El señor Moya planteó una acción en la cual se pretendía se declare como consecuencia del vertimiento de aguas negras de la EEB, que se han producido daños a la comunidad de Sibaté, se hablaba del Muña entonces cuando habla del riesgo aceptable: probabilidad de sufrir un daño. En una muestra de los municipios de la cuenca del río Bogotá afectada por los compuestos volátiles, no por el contacto y la ingesta del agua. Los casos por afectación son 4784 casos por cada cien mil habitantes, le sigue el Municipio de Apulo con 3776 casos y en ese orden El Colegio municipio muy próximo, descarga en el Embalse del Muña Cadena Pagua propiedad de EMGESA, y otros, que sin tener conexidad con el Río por su ubicación y corrientes de aires se movilizan los compuestos volátiles los cuales producen cáncer por influencia grave sobre la salud de las personas. Se ha dicho que el CONPES 3320 se equivocó al decir que el alto impacto justifica la necesidad de

Expediente No. 25000-23-27-000-2001-0479-01  
Acumulados Nos. 2000-0428, 2001-0122, 2001-0343  
Actor: GUSTAVO MOYA ÁNGEL Y OTROS  
Acción Popular

contaminar con el bombeo de estas aguas del Río al Embalse del Muña. ¿Miente? ¿Tiene la razón EMGESA? El fallo califica como catástrofe ecológica y lo mucho que le duele el padecimiento de quienes viven allí, citado núm. 6.4.12 y declara: Aunque el Municipio de Sibaté está viéndose afectado por el represamiento también es responsable de su degradación, prometiendo siempre que se va a resolver y no lo han hecho. En el numeral 6.23.3 de la sentencia se afirma que EMGESA no es responsable, entonces la interpretación dada a la contaminación alegada no es la del río sino la del embalse. Antiguamente la cadena iba por el cauce del río y no se bombeaba. Es necesario que se tomen las medidas y soluciones que cuesten menos a la ciudadanía, y sean las más convenientes a los intereses de la comunidad; la población paga por la prestación del servicio. No quieren esperar otros veinte años para que se resuelva el problema del río Bogotá.

#### **VIII.5.9. MUNICIPIO DE VILLAPINZÓN**

A través del alcalde hizo un resumen de actividades que ha realizado en el municipio en compañía con el Departamento y la CAR pero, además, pretende hacer algunas precisiones.

El Municipio de Villapinzón desde 1992, ha logrado con recursos de la CAR y del Departamento a través de proyectos y convenios, comprar terrenos de reserva ilegalmente ocupados. En el nacimiento del río se habría encontrado que a 300 mts de la laguna en medio de un

Expediente No. 25000-23-27-000-2001-0479-01  
Acumulados Nos. 2000-0428, 2001-0122, 2001-0343  
Actor: GUSTAVO MOYA ÁNGEL Y OTROS  
Acción Popular

valle que tiene un colchón de agua, sistema muy vulnerable, se habrían encontrado una serie de viviendas en las cuales se sembraba papa, entonces se adquirieron más de dos mil hectáreas. Además, con el objeto de recuperar la flora nativa, se han encerrado los predios y el camino de límite entre Cundinamarca y Boyacá para impedir el paso hacia estos terrenos para cortar leña. También para cuidar los predios se cuenta con guardabosques quienes han presentado denuncias y se han hecho requerimientos a quienes realizan actividades de pastoreo y cultivo de papa. Hacen parte del Plan Departamental de aguas, se inició el plan de alcantarillado de Villapinzón, a raíz de la ola invernal. A pesar de ser el primer Municipio de la cuenca, hasta ahora está direccionando la construcción de su PTAR y acudido al Ministerio de Ambiente para financiar el acueducto y con un presupuesto anual de \$9.400 millones de pesos, para cumplir con todas las obligaciones que corresponden al municipio que sólo para construir la PTAR se llevaría todo el presupuesto. En la tercera etapa la CAR va a financiar su construcción. Dentro de las actuaciones adelantadas por el municipio. Allega documento. Agrega que tiene las funciones delegadas por la CAR, ordenando cierres definitivos y temporales de las curtiembres a través de las autoridades de policía a 51 curtiembres. Hay una en la cual derivan su existencia más de cinco mil personas, razón por la cual acabarlas es muy difícil, entonces se les ha solicitado planes de manejo a través de mesas de trabajo se ha buscado solución a la problemática. Cierres definitivos: 12 a través de la autoridad de policía. Hay un aspecto que hace difícil esta situación, porque no es viable su aprobación según

Expediente No. 25000-23-27-000-2001-0479-01  
Acumulados Nos. 2000-0428, 2001-0122, 2001-0343  
Actor: GUSTAVO MOYA ÁNGEL Y OTROS  
Acción Popular

lo prevé la Resolución 76 Inderena, según la cual las zonas con una altura de 2650 mts constituyen zona de reserva forestal, luego 47 municipios los cobija esta medida y entonces el 90% es reserva forestal pero la resolución solo salió hace dos años y se han sacado esquemas de ordenamiento territorial definiendo de manera amplia las zonas de protección y ahora la resolución define la zona de reserva que significa que solo se contaría con el casco urbano y las escuelas porque con una población que vive de las curtiembres no serviría al medio ambiente porque hay empresas interesadas de emplear sistemas pero la alcaldía no las puede aprobar se ha solicitado excluir algunas zonas de reserva pero el procedimiento es muy demorado entonces los curtidores van a seguir contaminando cuando el municipio ya podría haber solucionado el problema. Villapinzón ha aprobado los permisos donde no es zona de reserva. Por último el Ministerio de Minas está aprobando concesiones para la explotación minera en zonas que superan los 2800 mts de altura y luego dejan la problemática a los alcaldes; luego antes de aprobar se debían tener en cuenta las zonas de especial protección.

#### **VIII.5.10. MUNICIPIO DE TOCANCIPÁ**

Por medio de apoderado judicial, Dr. Jorge Sarmiento quien en representación del alcalde, indicó que a través de las acciones tomadas, busca responder necesidades y problemas ambientales, concretamente, hace referencia a los resultados en términos de inversión a nivel de saneamiento básico, PTAR, pozos profundos e inversiones

Expediente No. 25000-23-27-000-2001-0479-01  
Acumulados Nos. 2000-0428, 2001-0122, 2001-0343  
Actor: GUSTAVO MOYA ÁNGEL Y OTROS  
Acción Popular

por valor de trece mil millones de pesos en nueve años. El problema está asociado a los vertimientos si se controlan y mitigan va a haber una respuesta correlativa. En zonas rurales, pueden determinarse en una magnitud y otra respecto de los urbanos con mayor índice de contaminación, como lo es el río Bogotá. Es importante verlo como una serie de elementos topográficos que benefician la calidad del río. El municipio ha comprado en zonas de recarga acuífera en donde la agricultura ya no se está realizando. Igualmente, con la conservación de bosques nativos en términos de reforestación, vivero, siembra, sitios estratégicos, frente minero hoy con el apoyo de la Agencia Nacional de Minas y la Car se han suspendido temporalmente 13 frentes y de esta manera se están mitigando los daños. Muestra cuadro actividades. Otra cosa es el mantenimiento del río en el Paso hidráulico, en el cual se han invertido más de tres mil millones. Se busca además de los 26 kms que se han dragado por la Car se están planteando diseños y nuevos jarillones. La limpieza es fundamental. Destaca que los peces están contaminados con mercurio aunque son pocos los que los utilizan, si se pueden ver afectados. En términos de resultados, se han invertido más de 20 mil millones en el Proyecto Parque ronda del río con desarrollos de paisajismo, actividades lúdicas recreativas y desarrollo sostenible al recurso porque de otra manera, el tener el río en manos de finqueros no va a ser de protección. El río requiere de una función dinámica y ecológica para recuperar los ecosistemas.

La longitud del río parte del municipio y es un ecosistema muy importante, el proyecto se encuentra en

Expediente No. 25000-23-27-000-2001-0479-01  
Acumulados Nos. 2000-0428, 2001-0122, 2001-0343  
Actor: GUSTAVO MOYA ÁNGEL Y OTROS  
Acción Popular

fase de diseño y quieren que los otros municipios asuman ese compromiso. La Constitución Política es ecológica y todos los que tomamos agua tenemos una correlación directa.

#### **VIII.5.11. EL MINISTERIO PÚBLICO**

Representado por el doctor Roberto Augusto Serrato, señaló la posición institucional respecto de tan importante controversia.

Consideró que se trata quizá del proceso judicial más importante por dos factores: la cuantía, cerca de seis billones de pesos y por la trascendencia social de este conflicto. Bogotá alberga la mayor población y sumado a ello, la Acción Popular tiene un componente adicional de un hecho notorio bajo el contexto de la tragedia ecológica, salubridad, ambiente sano y efectiva prestación de servicios públicos:

Antecedentes de la demanda, condena subsección cuarta del Tribunal que tuvo la particularidad que fue parcial y consideró que no estaban dados los elementos de un pacto de cumplimiento, razón que fue objeto del recurso del Procurador Judicial. Sumado a lo anterior, en segunda instancia no se puede mantener porque como quiera que como lo ha resaltado la Corporación no caben pactos parciales de cumplimiento y el derecho colectivo no puede ser parcialmente protegido. Solicita en estos términos, confirmación parcial de la sentencia aquello se vio como tal se tenga para una sentencia.

Expediente No. 25000-23-27-000-2001-0479-01  
 Acumulados Nos. 2000-0428, 2001-0122, 2001-0343  
 Actor: GUSTAVO MOYA ÁNGEL Y OTROS  
 Acción Popular

**Aspectos fundamentales:**

- 1.-Contaminación del río Bogotá, es un hecho notorio la vulneración de los derechos colectivos,
- 2.- Existe corresponsabilidad no solo predicable de una entidad sino del conjunto de las entidades involucradas así como de los particulares que tienen actividades en o con el río.
- 3.- Los particulares ejercen actividades también deben concurrir para la protección derechos colectivos porque deben aplicar desarrollo sostenible y producción más limpia.

Elementos que comportaran solución: Jurídico, competencial, técnico, económico-financiero. La diapositiva ubica tres cuencas alta, media y baja. Cuenca alta problemas y soluciones: municipios que la integran Villapinzón y Chocontá, entre otros. Problemática: tema asociado a ladrilleras, floricultores, mataderos y curtiembres, destaca a Villapinzón y Chocontá por la industria del cuero que contamina con materiales como el cromo; igualmente PTARES no construidas o que no funcionan y otra transversal a las tres cuencas: canales de conducción que llevan agua a las PTAR que ha generado traumas. Resalta algunos problemas y responsables:

1. Alteración sistemas de páramo y ecosistemas boscosos. Páramo hay que protegerlo, el esfuerzo debe ser mayúsculo sobre todo por el gremio de papicultores. Debe partirse de la reforestación y concientización de acciones transversales,

Expediente No. 25000-23-27-000-2001-0479-01  
Acumulados Nos. 2000-0428, 2001-0122, 2001-0343  
Actor: GUSTAVO MOYA ÁNGEL Y OTROS  
Acción Popular

verificación de los deberes por parte de los órganos de control: Contraloría y Ministerio Público.

2. Contaminación industrial curtidores cuero, surge inquietud asociada, no se vislumbra solución fácil a la problemática; este problema tiene génesis en 1962 por qué no pensar que todas las personas involucradas encuentren soluciones porque si hay que generar empleo también hay que proteger ya sea a través de la construcción de una PTAR o generar reubicación y empleo porque no se puede permitir su permanencia.
3. El tema de presión de aguas subterráneas, los floricultores deben generar un sistema de implementación y tratamiento de producción limpia. Ladrilleras reforestación y en el sector minero se debe hablar de la implantación de tecnologías limpias; es necesario que el Estado reglamente las zonas de minería e igualmente deberá revocarse la licencia minera a quien no cumpla.

La Cuenca Media aporta la carga contaminante cercana al 80% en ella está ubicada la ciudad de Bogotá, la contaminación industrial se concentra en San Benito y mataderos de la ciudad y otras industrias. Se pretende un conglomerado industrial consciente de la necesidad de tecnología más limpia, PTRES, tema de verificación de órganos control y seguimiento contaminación del río. Red unida hidrometeorológica de aguas, es necesario hacer ese monitoreo para saber en qué sitio se hace la contaminación porque algunas de las empresas muestran cumplimiento pero después termina la visita se encuentra que hay una contaminación posterior. Necesidad plan de

**Expediente No. 25000-23-27-000-2001-0479-01**  
**Acumulados Nos. 2000-0428, 2001-0122, 2001-0343**  
**Actor: GUSTAVO MOYA ÁNGEL Y OTROS**  
**Acción Popular**

choque respecto de los procesos sancionatorios. En la CAR están en 80, 18 están en la cuenca alta, es necesaria su rigurosidad en la cuenca media; pérdida de biodiversidad y el tema asociado construcción PTAR Canoas y otros elementos se traducen en la solución a la problemática del río Bogotá.

Estimó el Ministerio Público deben trabajarse cuatro aspectos: 1.-Construcción PTAR Canoas 2. Ampliación PTAR Salitre y la construcción estación elevadora. Inicialmente se planteó un Pacto de Cumplimiento por la EAAB ratificada mediante el acuerdo 171 y los acuerdos de 2009 y 2011 con presencia del Presidente de la República se señaló la corresponsabilidad y la necesidad de concurrir financieramente. Dentro de este contexto solicita se respeten dichos acuerdos y no una línea diferente, las posiciones son institucionales y más si están contenidas en acuerdos.

Cuenca baja no se ha hecho un trabajo dentro del expediente debe el fallo abarcar este aspecto. Si se pretende llevar agua limpia y descontaminada deberán construir Plantas de Tratamiento, de otra forma no podrá solucionarse la tragedia ecológica.

En representación de la Procuraduría Delegada de Ambiente y en su calidad de ingeniero, el señor Felipe Aparicio propuso como solución técnica: la construcción de la Planta de Tratamiento de Aguas Residuales en Canoas, la Estación Elevadora en Canoas y la ampliación de la PTAR Salitre.

Expediente No. 25000-23-27-000-2001-0479-01  
Acumulados Nos. 2000-0428, 2001-0122, 2001-0343  
Actor: GUSTAVO MOYA ÁNGEL Y OTROS  
Acción Popular

Aspectos técnicos: La Procuraduría quiere hacer unos llamados de atención, para lo cual considera importante tocar cinco aspectos: 1. PTAR Canoas, inversiones altas en estudios y diseños y por eso es bueno volverlos a recordar desde 1929, 1974, 1985, 1989-1993, 2000 UT Saneamiento río Bogotá PTAR Salitre y una Secundaria en Soacha; 2002 Procuraduría General acompaña mesas de trabajo conjuntas y en reunión con expertos se adoptó el tratamiento químicamente asistido y el saneamiento; 2009 Salitre-Canoas y los interceptores; 2003 Prediseño Canoas Carlos Giraldo López, 2008; MMV Ing. Ltda. 22 mayo 2007 Convenio 171, con cargo FIAB, solución está realizando la EAAB. Interceptores Tunjuelo- Canoas; la estación elevadora y la construcción de la PTAR Canoas. 21-feb-2011 Ministerio de Ambiente, Gobernación, CAR y DC acuerdo Planta Canoas Fases I y II TQA y fase dos tratamiento secundario. Posteriormente Cooperación Construcción Aguas residuales Canoas el 5 diciembre 2011 se celebra acuerdo Acueducto-Emgesa: construcción EE Canoas aporte económico EMGESA. La PGN estima es PTAR Canoas.

No es solo CANOAS sino que hay que mirar solución integral del río. La Procuraduría General de la Nación reclama acciones en las cuencas alta media y baja. Adecuación Hidráulica río Bogotá ya iniciada por la CAR. Planes Maestros Acueducto y Alcantarillado cofinanciados por la Gobernación, todavía hay fallas en las plantas de tratamiento de agua potable.

Expediente No. 25000-23-27-000-2001-0479-01  
Acumulados Nos. 2000-0428, 2001-0122, 2001-0343  
Actor: GUSTAVO MOYA ÁNGEL Y OTROS  
Acción Popular

4.- Caudal Ecológico, sector Salto Tequendama y Cambio Climático, protección zonas amortiguación y rondas del río y sus afluentes.

5.- Parques Industriales San Benito y Villapinzón.

#### **VIII.5.12. LA CONTRALORÍA GENERAL DE LA REPÚBLICA**

A través de los Contralores Delegados manifestó que la posición institucional es afirmar que se requiere lograr el balance Hídrico del río, de las rondas y zonas de amortiguación, manejo de sedimentos y dragado y decir a la Sala en este proceso judicial dada la magnitud y protección del medio ambiente, que debe ser clara la competencia en términos de autoridad y ejecución para la articulación frente a la gestión integral de la cuenca. Ya existen experiencias en el mundo, se recuperó el Rhin y el Nilo, lo que hace necesario crear entidades que se encarguen de la gestión integral de la cuenca. Responsabilidad específica de los diferentes actores. La Contraloría estará atenta por los riesgos al patrimonio público por obras ordenadas en la sentencia y que se están ejecutando en relación con vertimientos al río Bogotá, así como del manejo del Fondo Nacional de Regalías con destinación específica, competencias del Ministerio de Ambiente y de la Car, la sentencia debe comprender una gestión integral para la protección de la cuenca y garantizar la protección del derecho colectivo a un ambiente sano.

Expediente No. 25000-23-27-000-2001-0479-01  
Acumulados Nos. 2000-0428, 2001-0122, 2001-0343  
Actor: GUSTAVO MOYA ÁNGEL Y OTROS  
Acción Popular

Intervino el Doctor Velilla para señalar que las personas acreditadas en el proceso y que quieran presentar documentos lo pueden hacer con traslado de cinco días y la decisión se notifica en estrados. Para el efecto se suscribe el acta y levanta la sesión de audiencia.

## **VIII.6. ALEGATOS DE CONCLUSIÓN**

### **VIII.6.1. EL MINISTERIO DE AGRICULTURA Y DESARROLLO RURAL**

En sus alegatos de conclusión solicitó revocar los literales f y q numeral 3 de la parte resolutive, declarar próspera la excepción de falta de legitimación en la causa por pasiva y negar las súplicas de la demanda respecto de dicha entidad (fl. 8994).

### **VIII.6.2. LA SOCIEDAD EMGESA S.A. E.S.P. (fls. 11767 A 11778)**

Presentó sus alegatos de conclusión en los siguientes términos:

- En documento en diapositivas señaló que la Empresa no contamina el río Bogotá; indicó además que Bogotá genera el 85% de la contaminación de la cuenca, más de 185.930 toneladas por año y la empresa es un afectado de la contaminación.
- En la propuesta hecha para el fallo de primera instancia denominada "pacto de cumplimiento",

Expediente No. 25000-23-27-000-2001-0479-01  
Acumulados Nos. 2000-0428, 2001-0122, 2001-0343  
Actor: GUSTAVO MOYA ÁNGEL Y OTROS  
Acción Popular

realizó acciones: 140 Hs. de terreno desecadas; aislamiento del embalse con respecto al municipio; 570.000 toneladas de recuperación del espejo de agua mejoramiento paisajístico; disminución de zancudos al 99.96%; seguimiento y monitoreo del agua, recuperación de oxígeno disuelto en el embalse.

- Destacó que utiliza el agua concesionada para generar energía; genera con la calidad del agua recibida; es importante para la confiabilidad y seguridad energética de la región y del país. La solución al saneamiento del Río debe ser compatible con la generación de energía.
- Presentó una alternativa para la solución técnica integral al saneamiento del río Bogotá, que incluye la construcción de la PTAR Canoas, el Túnel de Emergencia, los interceptores, y la Planta Elevadora.
- Fue a partir de esta propuesta fue que se firmaron los convenios y se apropiaron los recursos. Emgesa se comprometió a aportar la suma de 84 mil millones.
- Emgesa no aparece vinculada por la contaminación del río Bogotá y por tanto no debería ser condenada.
- Emgesa no contamina el agua del río Bogotá, por lo tanto no existe nexo de causalidad entre el daño y la conducta de EMGESA.
- Emgesa ha cumplido con las obligaciones impuestas en el fallo de primera instancia y no es viable que ahora se le impongan cargas por la contaminación del río. Su contribución no puede tomarse como

Expediente No. 25000-23-27-000-2001-0479-01  
Acumulados Nos. 2000-0428, 2001-0122, 2001-0343  
Actor: GUSTAVO MOYA ÁNGEL Y OTROS  
Acción Popular

aceptación de responsabilidad por la contaminación del río.

- Concluyó que no es responsable de la contaminación del río Bogotá. Solicitó ratificar el fallo de primera instancia y adoptar una solución integral que le permita continuar con la prestación del servicio público de energía.

**IX.6.3. ALPINA PRODUCTOS ALIMENTICIOS S.A. - ALPINA- ETERNIT COLOMBIANA S.A., LÍQUIDO CARBÓNICO COLOMBIANO S.A., SOCIEDAD CRISTALERÍA PELDAR S.A., REFINADORA DE SAL S.A. -REFISAL-, CERVECERÍA LEONA S.A. Y GRUPO SIDERURGICO DIACO S.A. (FLS. 11859 A 11861)**

Por medio de apoderado presentaron alegatos de conclusión en los siguientes términos:

- No existe prueba que demuestre responsabilidad de las industrias, por el contrario, se aportaron los permisos de vertimiento y se realizaron visitas e inspecciones a las respectivas instalaciones de las empresas para constatar el cumplimiento de las normas ambientales.
- Se han desconocido a lo largo del proceso las garantías al debido proceso y al derecho de defensa, así como la presunción de inocencia y el principio de igualdad. Ello en razón a que no se notificó en debida forma el auto admisorio de la

Expediente No. 25000-23-27-000-2001-0479-01  
Acumulados Nos. 2000-0428, 2001-0122, 2001-0343  
Actor: GUSTAVO MOYA ÁNGEL Y OTROS  
Acción Popular

demanda, pues no se hizo entrega de copia de la demanda y de sus anexos. Si bien es cierto el incidente de nulidad prosperó según auto de 30 de agosto de 2002, al no estar vigente la Ley 794 de 2003, no cabe considerar la notificación por conducta concluyente. (refiere sentencia 2003030001 AG) en la que se dejó establecido que luego de decretada la nulidad, se debía de realizar nuevamente la diligencia de notificación personal.

- Las empresas vinculadas lo fueron en virtud de un listado de empresas investigadas por la CAR, mediante proveído de 1º de abril de 2002 que dispuso revocar de oficio el auto de 20 de marzo que ordenaba su vinculación "en garantía", con franca vulneración de la presunción de inocencia, pues ninguna de ellas ha sido sancionada por la CAR y del principio de igualdad en relación con las demás industrias que realizan vertimientos al río Bogotá y sus afluentes.
- No se resolvió la excepción de legitimidad por pasiva alegada por Cristalería Peldar S.A. contrariando los derechos de acceso a la justicia, debido proceso y derecho de defensa.
- No procede la condena en costas a las industrias referidas porque ninguna de ellas fue condenada, ni declarada responsable; tampoco obra en el expediente prueba que acredite infracción a disposiciones ambientales y siempre se alegó la inocencia de las industrias y su deseo de

Expediente No. 25000-23-27-000-2001-0479-01  
Acumulados Nos. 2000-0428, 2001-0122, 2001-0343  
Actor: GUSTAVO MOYA ÁNGEL Y OTROS  
Acción Popular

colaborar con el saneamiento del río Bogotá.

- En caso de no prosperar la nulidad impetrada, solicita se exonere a Cristalería Peldar S.A. y Refisal S.A. y se revoque la condena en costas. Empero, de no ser revocados o anulados, los pactos propuestos se cumplirán en los términos establecidos.

#### **VIII.6.4. ASEGURADORA COLSEGUROS S.A., HOY SEGUROS ALLIANZ S.A., (fls. 11863 a 11864)**

Por medio de apoderada puso de presente que en la sentencia de 25 de agosto de 2004, el Tribunal Administrativo de Cundinamarca, Sección Cuarta acogió la excepción por ella formulada sobre la inexistencia de riesgo asegurable, y negó el llamamiento en garantía, razón por la cual fue desvinculada del proceso.

#### **VIII.6.5. LA SOCIEDAD PAPELES Y CORRUGADOS ANDINA S.A.(fls.11866 a 11867)**

Por medio de apoderado, presentó sus alegatos de conclusión, destacando que participó de manera activa en las mesas de trabajo, además que el pacto de cumplimiento por ella presentado, y aprobado por la sentencia de primera instancia, no fue objeto de reparo por las partes ni por el Ministerio Público.

Consideró que las apelaciones presentadas en contra de la aprobación de los pactos de cumplimiento, deben ser

Expediente No. 25000-23-27-000-2001-0479-01  
Acumulados Nos. 2000-0428, 2001-0122, 2001-0343  
Actor: GUSTAVO MOYA ÁNGEL Y OTROS  
Acción Popular

rechazadas, en tanto que con ellos se busca la eficacia, celeridad y economía del proceso, siendo entonces un mecanismo que concreta la protección de los derechos colectivos por iniciativa de los involucrados en el trámite procesal.

#### **VIII.6.6. LA SOCIEDAD STANTON & CÍA. S.A. (fls. 11873 a 11875)**

Frente a los recursos de apelación instaurados, manifestó que la presentación del pacto de cumplimiento, la observancia de sus deberes ambientales y el aporte voluntario a la solución del problema de contaminación del río Bogotá y del Embalse del Muña, dejan claro que no ha sido reconocida como un agente contaminador.

Adujo que el pacto de cumplimiento no fue objeto de reparos, por el contrario, fue aprobado por la sentencia de 25 de agosto de 2004, después de superar el juicio de legalidad por la Magistrada sustanciadora.

Sobre la condena en costas, presentó recurso de apelación adhesiva, señalando que no se probó que la sociedad Stanton & Cía S.A. fuese un agente contaminador del Embalse del Muña y del río Bogotá, al no haberse demostrado los elementos de la responsabilidad imputada a la demandada, no hay lugar a la condena en costas.

En estos términos solicitó se revoque el numeral primero de la sentencia complementaria de 16 de septiembre de 2004, en lo que toca a Stanton & Cía S.A.

Expediente No. 25000-23-27-000-2001-0479-01  
Acumulados Nos. 2000-0428, 2001-0122, 2001-0343  
Actor: GUSTAVO MOYA ÁNGEL Y OTROS  
Acción Popular

#### **VIII.6.7. LA FEDERACIÓN COLOMBIANA DE ORGANIZACIONES AMBIENTALES (fl. 11920)**

Solicitó se decida de fondo sobre los siguientes puntos:

- Definir de manera clara y contundente, de acuerdo con la ley y la jurisprudencia, a quiénes corresponde la descontaminación del río Bogotá.
- Que los organismos de control asuman su rol de acuerdo con las competencias atribuidas, en aras de evitar la consumación de un perjuicio irremediable.
- La procedencia de incidentes y otros trámites dirigidos a dilatar el cumplimiento de las obligaciones que competen a cada entidad.
- El contenido y alcance de los derechos fundamentales de tercera generación, concretamente el derecho a gozar de un ambiente sano en conexidad con la vida.
- La colaboración armónica, con el respeto y acatamiento de las competencias de cada entidad y la normatividad vigente, para evitar posibles detrimentos patrimoniales.
- Calcular a largo plazo la totalidad de los recursos que se deben invertir en el Mega Proyecto Río Bogotá.

#### **VIII.6.8. LA DEFENSORÍA DEL PUEBLO, REGIONAL CUNDINAMARCA (fl. 11938 a 11947)**

Por medio de apoderada, alegó de conclusión en los siguientes términos:

Expediente No. 25000-23-27-000-2001-0479-01  
Acumulados Nos. 2000-0428, 2001-0122, 2001-0343  
Actor: GUSTAVO MOYA ÁNGEL Y OTROS  
Acción Popular

La evidente contaminación del río Bogotá, permite afirmar que nos encontramos ante una vulneración de derechos fundamentales y colectivos, cuya protección, conservación, recuperación y/o restauración deben ser prioritarios para la administración pública y los administrados.

De no establecerse políticas concretas y claras en la recuperación del río Bogotá y sus afluentes, se estará permitiendo que un hecho de tal magnitud continúe produciendo estragos sobre los seres humanos y las generaciones futuras no tendrán derecho a disfrutar y gozar del mismo.

Manifestó que de no construirse la PTAR Canoas, el municipio se vería ampliamente perjudicado ante la incapacidad de dirigir sus aguas residuales a una Planta de Tratamiento y tendría que seguir depositando las aguas residuales al Río que, a su vez, implica que tanto la cuenca baja de la corriente fluvial, como el río Magdalena y los municipios aledaños, así como los cultivos, pastos, ganado y el ecosistema marino sigan contaminados.

Adicionalmente, advirtió del posible detrimento patrimonial que se ocasionaría al no poder destinar los recursos a las obras en mención para el proyecto contratado.

Previo análisis normativo y jurisprudencial, manifestó compartir y apoyar los criterios expuestos por la

Expediente No. 25000-23-27-000-2001-0479-01  
Acumulados Nos. 2000-0428, 2001-0122, 2001-0343  
Actor: GUSTAVO MOYA ÁNGEL Y OTROS  
Acción Popular

Procuraduría General de la Nación relativos a:

La protección especial que debe darse al páramo de Guacheneque; la recuperación de la ronda urbana e industrial de Villapinzón y la construcción de la PTAR en dicho municipio; la construcción de las plantas de tratamiento en los municipios de Villapinzón, Chocontá, Tocancipá, Suesca, Sesquilé, Guatavita, Gachancipá, Nemocón, Cogua, Zipaquirá, Sopó, La Calera, Cajicá, Chía, Cota, Tabio y Tenjo.; la adecuación hidráulica del río Bogotá en las cuencas alta, media y baja; el control de vertimientos en la cuenca media de las industrias y explotación de materiales de construcción, así como la adecuación de las Plantas de Tratamiento de los municipios de Funza, Mosquera, Madrid, Subachoque, El Rosal, Facatativá, Bojacá y Soacha; adecuación y construcción PTARS de San Antonio del Tequendama, Tena, El Colegio, Anapoima, Viotá, Zipacón, Anolaima, Cachipay, Apulo, La Mesa, Tocaima, Agua de Dios y Girardot; se delimite un parque industrial en el cual se efectúe el control al vertimiento de aguas, especialmente las curtiembres que se realizan en la ronda del Río. Igualmente llama la atención sobre el sector del Salto del Tequendama y las obras del proyecto del Río.

Solicitó de manera especial respetar los acuerdos suscritos por los estamentos de la Administración, plasmados en Pactos de Cumplimiento contemplados en la sentencia de primera instancia; continuar con las obras desarrolladas en cumplimiento de los mismos, acatar y ejecutar los convenios administrativos celebrados entre órganos de la administración relacionados con la

Expediente No. 25000-23-27-000-2001-0479-01  
Acumulados Nos. 2000-0428, 2001-0122, 2001-0343  
Actor: GUSTAVO MOYA ÁNGEL Y OTROS  
Acción Popular

construcción de la PTAR Canoas, y la estación elevadora en los términos concertados.

Igualmente respetar, la continuidad y mantenimiento de las obras adelantadas en el Municipio de Soacha relacionadas con los conectores que dirigirán sus aguas a la PTAR Canoas; ofrecer asesoría y asistencia por parte de las autoridades ambientales en la implementación de programas en curtiembres, ladrilleras e industrias para el manejo y tratamiento de aguas residuales.

Expuso la necesidad de brindar una capacitación adecuada sobre la producción más limpia a las autoridades de los municipios de la cuenca del Río ; realizar campañas de reciclaje de residuos sólidos; construir, manejar y conserva la PTAR de su localidad; establecer la red hidrometereológica en la cuenca del Río y sus afluentes para definir el nivel de contaminación de dichas corrientes fluviales; reforzar el personal de policía encargado de las funciones de protección del medio ambiente; reubicar a las personas y familias que habitan la ronda del Río y sus afluentes y todas las demás que se requieran para ejercer el control y descontaminación del Río y sus afluentes especialmente frente a las curtiembres, ladrilleras, canteras, mataderos y demás actividades que puedan generar contaminación.

#### **VIII.6.9. EL DEPARTAMENTO DE CUNDINAMARCA (fl. 11982)**

Por medio de apoderado judicial, alegó de conclusión en escrito obrante a folios 11982 a 11999, en los siguientes términos:

Expediente No. 25000-23-27-000-2001-0479-01  
Acumulados Nos. 2000-0428, 2001-0122, 2001-0343  
Actor: GUSTAVO MOYA ÁNGEL Y OTROS  
Acción Popular

El departamento como organización territorial tiene funciones de coordinación, concurrencia e intermediación entre la Nación y los municipios, lo cual no varía en materia ambiental, así el artículo 64 de la Ley 99 de 1993, le asigna competencias especiales que difieren de las obligaciones impuestas en el fallo de primera instancia, no obstante ha realizado actividades que pasó a destacar, así:

**Control de vertimiento de aguas domésticas especialmente grasas, nitratos y fosfatos:**

Se trata de una atribución propia de las autoridades ambientales, sin embargo la Secretaría de Ambiente del Departamento reportó al Gestor del Plan Departamental de Aguas-PDA la información de la CAR y de Corpoguavio. La CAR reportó un inventario de 561 responsables de vertimientos de agentes contaminantes con su ubicación geográfica, municipio y cuenca, en los cuales se verifican parámetros de grasa y aceites, temperatura, acidez, alcalinidad, cloruros, coliformes totales, E-coli, conductividad, DBO, DQO, dureza cálcica, entre otros.

De otra parte, la Secretaría de Salud de Cundinamarca realizó levantamiento de información sobre las poblaciones que consumen aguas del Río Bogotá a través de acueductos con o sin plantas de tratamiento y existencia de riesgo a la salud, derivado del uso de las aguas para riego de cultivos agrícolas y abrevadero de ganado, encontrando que de estos riesgos no se ha obtenido asociación con los perfiles epidemiológicos de los

Expediente No. 25000-23-27-000-2001-0479-01  
Acumulados Nos. 2000-0428, 2001-0122, 2001-0343  
Actor: GUSTAVO MOYA ÁNGEL Y OTROS  
Acción Popular

municipios de área de influencia.

Realiza vigilancia y control de la calidad del agua para el consumo humano de los acueductos que surten los municipios del área de influencia del río Bogotá, mediante la toma y análisis de muestras en las redes de distribución para la determinación de los índices de riesgo de calidad del agua -IRCA-, visitas de inspección sanitaria a los sistemas de abastecimiento con el fin de evaluar los índices de riesgo por abastecimiento -IRABA y las buenas prácticas sanitarias -BPSpp-.

Así mismo, a través de la Secretaría de Agricultura y Desarrollo Rural ha promovido los siguientes programas de producción más limpia -PML, cuya responsabilidad recae en los empresarios o productores.

PROCAZ-CAR-GTZ, ha establecido una red de agricultura sostenible por medio de la UMATA, específicamente en agricultura de conservación de agua y suelo mediante la tecnología de siembra directa-labranza mínima, la cual incide de manera favorable en el manejo y mejoramiento de la cuenca del río Bogotá. El proyecto se basa en la innovación para el manejo de los recursos de suelo y agua, disminuyendo el aporte de sedimentos a la misma laguna, aumentando la infiltración y mayor retención del agua en el suelo tanto en zonas de ladera como planas, en estas últimas se ha trabajado directamente sobre el manejo de praderas, que permite tener mayor forraje y menor pérdida de suelo por tenerse cobertura permanente. Dicha tecnología permite el manejo de abonos verdes lo que ofrece mayor disponibilidad de materia orgánica y

Expediente No. 25000-23-27-000-2001-0479-01  
Acumulados Nos. 2000-0428, 2001-0122, 2001-0343  
Actor: GUSTAVO MOYA ÁNGEL Y OTROS  
Acción Popular

mayor cantidad de agua retenida, así como disminución del empleo de agroquímicos.

El impacto en la implementación de sistemas alternativos de producción agropecuaria sostenible sobre la cuenca del río Bogotá, hace que se aporten menos sedimentos por erosión y menor contaminación por empleo de agroquímicos, mayor infiltración y retención de agua en zonas planas y de ladera circundantes a la laguna y se ofrece una alternativa al productor para que sus tierras sean más productivas y se disminuyan costos de producción. Igualmente se ha brindado capacitación tecnológica a las Unidades Municipales del Departamento.

**Inclusión de los PRAES -Proyectos ambientales escolares- en la educación primaria, media, tecnológica y superior:**

Señaló que si bien la Beneficencia de Cundinamarca no tiene dentro de sus fines misionales la educación en temas ambientales (obligación impuesta en la parte final del literal e) y literal k) del fallo), la Secretaría de Ambiente del Departamento ha desarrollado acciones de seguimiento, orientación y apoyo técnico a la formulación e implementación de Proyectos Ambientales escolares PRAES, significativos en su formulación y reformulación en las instituciones educativas; así como concursos, ferias, capacitaciones en materia de humedales, conservación de la cuenca, deforestación, manejo de residuos sólidos, reciclaje protección de la fauna silvestre, gestión ambiental municipal, cambio climático, manejo de residuos peligrosos y hospitalarios; en la ronda del río Bogotá se desarrollan programas de

Expediente No. 25000-23-27-000-2001-0479-01  
Acumulados Nos. 2000-0428, 2001-0122, 2001-0343  
Actor: GUSTAVO MOYA ÁNGEL Y OTROS  
Acción Popular

educación para la mitigación del riesgo, fortalecimiento en la implementación del PRAE y su inclusión al PEI, entre otros.

**Propiciar y controlar los procesos de producción más limpia de las curtiembres de Villapinzón y Chocontá:**

Subsidiar vivienda para los habitantes de la zona de ronda del Río y desalojar a quienes cuenten con recursos.

Al respecto indicó que no es competencia del Departamento el control de los procesos de producción más limpia de las curtiembres de Villapinzón y Chocontá, no obstante la Secretaría de Ambiente del Departamento contrató en el año 2006 la consultoría para determinar la viabilidad técnica, económica, ambiental, financiera y operativa de la construcción y operación de un sistema de disposición final de residuos sólidos generados por la industria de curtiembres y diseño detallado del relleno sanitario para la disposición final los residuos provenientes de los municipios de Villapinzón, Cogua y Chocontá; el Consejo Regional de Ciencia y Tecnología de Cundinamarca la conveniencia del proyecto "Plan estratégico en las curtiembres de Villapinzón: competitividad e innovación en la cadena productiva del cuero" presentado por IDEA, que dio lugar a su aprobación y firma del convenio entre COLCIENCIAS y ACURTIR, a través de procesos de producción más limpia, minimizar el consumo de agua, bajar cargas contaminantes en los vertimientos industriales y gestionar integralmente los residuos sólidos generados en el proceso productivo; definir y valorizar alternativas sostenibles para el manejo y aprovechamiento del unche o

Expediente No. 25000-23-27-000-2001-0479-01  
Acumulados Nos. 2000-0428, 2001-0122, 2001-0343  
Actor: GUSTAVO MOYA ÁNGEL Y OTROS  
Acción Popular

grasa, entre otros.

Concluyó de este ejercicio que los temas ambientales deben ser considerados de una manera integral, relacionando aspectos naturales, sociales, económicos, técnicos y políticos, con una mirada interdisciplinaria y con la participación efectiva de todos los actores involucrados.

**Protección y recuperación de zonas de ronda, tanto del río Bogotá como de los afluentes:**

Tampoco esta función corresponde al departamento, sino de cada ente territorial mediante la acción policiva de recuperación del espacio público. A pesar de ello, aunó esfuerzos técnicos, administrativos y financieros para que mediante convenios interadministrativos se apoyara la revisión y ajuste de los POT en 16 municipios de los cuales Guatavita, Suesca, Tausa pertenecen a la Cuenca Alta del río Bogotá.

**Plan de ordenación y manejo de la cuenca hidrográfica del río Bogotá -POMCA:**

Como norma de superior jerarquía, determina los planes de ordenamiento territorial de cada municipio y no del departamento, deben ser revisados y ajustados por los 41 municipios según las directrices y parámetros del POMCA, aprobado por el artículo 10 de la Ley 388 de 1997 y el artículo 17 del Decreto 1729 de 2002. El departamento realiza el acompañamiento y asesoría de la revisión y ajuste de los POT municipales, con énfasis en la

Expediente No. 25000-23-27-000-2001-0479-01  
Acumulados Nos. 2000-0428, 2001-0122, 2001-0343  
Actor: GUSTAVO MOYA ÁNGEL Y OTROS  
Acción Popular

incorporación de las determinantes ambientales aprobadas en el POMCA.

**Formulación de un modelo de ocupación territorial regional:**

En cumplimiento de las funciones de concurrencia, complementariedad y subsidiariedad asignadas a los departamentos, la Secretaría de Planeación de Cundinamarca a través de la Dirección de Desarrollo Regional identificó la necesidad de establecer lineamientos regionales en materia de ordenamiento territorial, para coordinar el desarrollo integrado y armónico de sus municipios y por ende del departamento. Para el efecto estableció un modelo de ocupación territorial MOT para 25 municipios de la Sabana de Occidente, para un óptimo aprovechamiento del suelo con carácter regional, con una visión de sostenibilidad, definición de los sistemas de infraestructura básica subregional: estructura socio económica. Se establecen unos principios ambientales y de ordenamiento como base para las decisiones del modelo de ocupación territorial que incluye la declaratoria de parques ambientales que rescaten los elementos que componen la estructura ecológica.

El modelo está conformado por tres estructuras superpuestas: la estructura ecológica principal, la estructura socioeconómica y espacial y la estructura funcional y de servicios.

La Ley Orgánica de Ordenamiento Territorial (Ley 1454 de

Expediente No. 25000-23-27-000-2001-0479-01  
Acumulados Nos. 2000-0428, 2001-0122, 2001-0343  
Actor: GUSTAVO MOYA ÁNGEL Y OTROS  
Acción Popular

2011) restablece las competencias del departamento en materia de ordenamiento del territorio lo cual permite que los lineamientos propuestos dentro del modelo de ocupación territorial regional tengan carácter vinculante en los POT de los municipios.

**Los municipios deberán dar cumplimiento a las sentencias dictadas por el Tribunal sobre la optimización de los mataderos y plantas de faenado:**

Reiteró que aun cuando no es competencia del departamento, la Secretaría de Agricultura, la CAR y FEDEGAN prestaron asesoría para la inscripción de proyectos de plantas que tengan cubrimiento regional. La misma secretaría ha realizado procesos de socialización zonal y la Secretaría de Salud realizó acciones de inspección, vigilancia y control sanitario a las plantas de beneficio ubicadas en los municipios de 4ª, 5ª y 6ª categoría del área de influencia del río Bogotá , hasta agosto de 2007 fecha a partir de la cual el INVIMA asumió las competencias en esta materia en cumplimiento de la Ley 1122 de 2006 y la Secretaría de Salud continuó con la responsabilidad del control sanitario en los expendios de carne y transporte asociado a esta actividad.

**Diseño, construcción y ejecución de los Planes Maestros de Acueducto y Alcantarillado en los municipios que corresponde al Departamento, promover, coordinar y cofinanciar:**

El departamento promovió, coordinó y cofinanció proyectos de acueducto y alcantarillado en todos los municipios de

Expediente No. 25000-23-27-000-2001-0479-01  
Acumulados Nos. 2000-0428, 2001-0122, 2001-0343  
Actor: GUSTAVO MOYA ÁNGEL Y OTROS  
Acción Popular

la cuenca del río Bogotá a través de la Secretaría de Obras Públicas entre 2004 y 2008 y a través del Plan Departamental de Aguas gestionó, promovió coordinó y cofinanció proyectos por la suma de \$553.779.248.

**Manejo Embalse del Muña:**

No es competencia del Departamento su manejo, sin embargo la Secretaría de Salud de Cundinamarca ha realizado acciones directas sobre el río Bogotá y el Embalse del Muña: control de plagas en áreas públicas e institucionales, sobre el control de plagas realizado por EMGESA directamente sobre el Embalse (en cumplimiento de tutela 02 de 1993); vigilancia y control sobre plaguicidas aplicados; levantamiento de información sobre morbilidad sentida en la población; vigilancia sobre intoxicaciones.

Como acciones indirectas sobre el río Bogotá y el Embalse del Muña ha realizado vigilancia y control de alimentos y bebidas alcohólicas en los municipios del área de influencia del río Bogotá; vacunación y control población canina, control presencia de enfermedades transmitidas por vectores, principalmente en las provincias del Tequendama, Alto Magdalena y Sumapaz; monitoreo de la calidad de agua potable (leyes 715 de 2001 y 1122 de 2007), financiación a través del Sistema General de Participaciones antiguo Plan de Atención Básica PAB, actualmente Plan de Inversiones Colectivas.

Adicionalmente, la Secretaría de Ambiente ha desarrollado las siguientes acciones: saneamiento básico en residuos

Expediente No. 25000-23-27-000-2001-0479-01  
Acumulados Nos. 2000-0428, 2001-0122, 2001-0343  
Actor: GUSTAVO MOYA ÁNGEL Y OTROS  
Acción Popular

sólidos: relleno sanitario Nuevo Mondoñedo (Inversión: \$4.203.849.610) con aportes del Departamento, la CAR el FNR y el concesionario.

El relleno sanitario recibe los residuos sólidos de 34 municipios de la Cuenca del río Bogotá que corresponde al 86.81% de los residuos dispuestos en el relleno en el mes de octubre de 2011. Para el tratamiento de los lixiviados generados en el relleno sanitario entraron en funcionamiento dos plantas de tratamiento de osmosis inversa y nanofiltración para tratar un caudal total de 480m<sup>3</sup>/día, el efluente se utiliza para riego en condiciones de uso agropecuario y su calidad cumple con las exigencias del MAVDT.

Los municipios además cuentan con sus propios sitios de disposición de residuos sólidos en rellenos sanitarios. También el departamento presta su apoyo a la elaboración de las PGIRS (Planes de Gestión Integral de Residuos Sólidos) en varios municipios de la cuenca: Guatavita, Apulo, Tena, Ricaurte, Sibaté, Zipacón, El Rosal, El Colegio, con aporte del Departamento, los municipios, y la CAR para un valor total de \$156.704.255.

En cuanto a la adquisición de predios de importancia estratégica para la conservación del recurso hídrico, la Secretaría de Ambiente ha participado en la adquisición de 1.691,83 hs que surten acueductos veredales y/o municipales en toda la cuenca, que además cumplen con la función de reducir las emisiones de dióxido de carbono causada por el efecto de la deforestación y degradación de bosques y así se disminuye el impacto derivado del

Expediente No. 25000-23-27-000-2001-0479-01  
Acumulados Nos. 2000-0428, 2001-0122, 2001-0343  
Actor: GUSTAVO MOYA ÁNGEL Y OTROS  
Acción Popular

cambio climático. Además los predios conservan variedad de fauna y flora convirtiéndose en escenarios potenciales para la práctica del ecoturismo sin amenazar la sostenibilidad de los ecosistemas.

Además el departamento ha realizado el mantenimiento de los predios adquiridos a través de la Secretaría de Ambiente tales como revegetalización, reforestación, fertilización, aislamiento, alinderación e instalación de cercados, protección de las áreas de reserva hídrica.

El Gobernador de Cundinamarca como Presidente del Consejo Directivo de la CAR dio prelación a los proyectos de estudio de los planes maestro de acueducto y alcantarillado de los municipios de la cuenca del río Bogotá, adecuación hidráulica del río Bogotá en el tramo Puente La Virgen-Alicachín, construcción y ampliación de la planta de tratamiento de El Salitre para lo cual se tramitó el crédito con el Banco Mundial por US\$250.000.000 el cual se consolidó en julio de 2012.

Finalmente destacó la realización de inversiones para atender la emergencia producida por la ola invernal y para el dragado del río Bogotá.

En cuanto al incentivo económico reconocido en la sentencia a favor de los actores, solicitó aplicar el criterio reiterado del Consejo de Estado, según el cual el incentivo ya no es procedente en las acciones populares, en tanto que desapareció del mundo jurídico con la expedición de la Ley 1425 de 2010.

Expediente No. 25000-23-27-000-2001-0479-01  
Acumulados Nos. 2000-0428, 2001-0122, 2001-0343  
Actor: GUSTAVO MOYA ÁNGEL Y OTROS  
Acción Popular

Con relación a la condena en costas y la orden de apropiaciones presupuestales señaladas en la sentencia complementaria, solicitó sea revocado el numeral primero, toda vez que dicha decisión fue adoptada por fuera del término de ejecutoria, desconociendo con ello el artículo 311 del C. de P.C. Desde un punto de vista sustancial adujo que de acuerdo con el artículo 55 de la Ley 446 de 1998, se condenará en costas, cuando se haya obrado con deslealtad o mala fe, lo que no ocurre en el presente caso respecto del Departamento de Cundinamarca.

**VIII.6.10 EL INSTITUTO DE HIDROLOGÍA,  
METEOROLOGÍA Y ESTUDIOS AMBIENTALES-IDEAM (fls.  
12031 a 12036)**

Por medio de apoderada judicial, afirmó no ser responsable de contaminar el río Bogotá, pues como Instituto de Investigaciones coordina la red hidrometereológica del Río, mas no es una autoridad ambiental que pueda imponer sanciones y evitar la contaminación del Río por la actividad que ejerce de forma exclusiva una empresa en el Embalse del Muña, de manera que no existe nexo causal del daño producido y las funciones que de acuerdo con los artículo 2 y 15 del Decreto 1277 de 1994, ejerce el IDEAM.

Destacó la celebración de contratos y convenios para realizar labores de seguimiento a la red de estaciones automáticas, respecto de lo cual indicó que, aun cuando la CAR no ha hecho entrega de la red que posee -como quedó plasmado en el Pacto de Cumplimiento- el IDEAM ha brindado el apoyo científico requerido para ello.

Expediente No. 25000-23-27-000-2001-0479-01  
Acumulados Nos. 2000-0428, 2001-0122, 2001-0343  
Actor: GUSTAVO MOYA ÁNGEL Y OTROS  
Acción Popular

En estos términos solicitó se modifique la sentencia en el sentido de exonerar al IDEAM de cualquier responsabilidad, en cuanto no contamina el río Bogotá.

**VIII.6.11. EL MINISTERIO DE AMBIENTE, VIVIENDA Y DESARROLLO TERRITORIAL, (fls. 11927, 12037 a 12049)**

Hoy, Ministerio de Ambiente y Desarrollo sostenible, por medio de apoderado alegó de conclusión en los siguientes términos:

1. Destacó en primer término que con fundamento en la Ley 1444 de 2011, artículo 18, ante la necesidad de contar con un organismo técnico con autonomía administrativa se dispuso la creación de un organismo encargado del estudio, expedición y aprobación de licencias, permisos y trámites ambientales, creado mediante Decreto 3573 de 2011, Autoridad de Licencias Ambientales - ANLA, organismo que en los términos del Decreto asumirá la representación judicial de la Nación en los asuntos de su competencia, particularmente en lo relacionado con el trámite de licencias ambientales para la construcción y operación de plantas de tratamiento de aguas residuales y/o cualquier otro proyecto u obra sujeto de licenciamiento.

2. El Ministerio de Medio Ambiente asumió en su momento, competencia del licenciamiento para la Planta de Tratamiento del Río, salitre-PTAR Salitre y mediante Resolución 817 de 24 de julio de 1996 otorgó licencia ordinaria al D.C. para el diseño, construcción, operación

Expediente No. 25000-23-27-000-2001-0479-01  
Acumulados Nos. 2000-0428, 2001-0122, 2001-0343  
Actor: GUSTAVO MOYA ÁNGEL Y OTROS  
Acción Popular

y demás actividades relacionadas con la PTAR Salitre.

3.- Mediante Resolución 993 de 29 de mayo de 2009, se autorizó la cesión de la licencia a la EAAB ESP.

4. Con respecto a la ubicación de la PTAR Canoas, tal y como lo manifestó el Gerente Corporativo de la EAAB, se están evaluando las alternativas para su ubicación, sin que hasta la fecha se haya tomado una decisión. Una vez definido corresponderá evaluar la viabilidad ambiental del mismo en los términos del Decreto 2820 de 2010, artículo 9 numeral 14 a la Corporación Autónoma Regional o a la Secretaría Distrital de ambiente, dependiendo de la jurisdicción en la cual se ubique la planta.

5. El Ministerio de Ambiente, Vivienda y Desarrollo Territorial a través del Decreto 3930 de 2010, actualizó la información relacionada con el ordenamiento del recurso hídrico y expidió nuevas normas para el manejo de vertimientos a aguas superficiales, suelos asociados con acuíferos, aguas, marinas y alcantarillados del país. La norma contiene lo relacionado con el manejo del recurso hídrico como instrumento de planeación de los cuerpos de agua, presupuesto básico para su posterior administración, desarrolla aspectos fundamentales para el control de vertimientos; igualmente el Ministerio se encuentra elaborando el proyecto de resolución "Por la cual se definen los usos del recurso hídrico, se establecen los criterios de calidad del agua y se dictan otras disposiciones"; igualmente, durante el año 2012 el Ministerio en coordinación con la Universidad del Valle desarrollan un proyecto para la elaboración de una

Expediente No. 25000-23-27-000-2001-0479-01  
Acumulados Nos. 2000-0428, 2001-0122, 2001-0343  
Actor: GUSTAVO MOYA ÁNGEL Y OTROS  
Acción Popular

propuesta técnica para la reglamentación del reúso del agua en Colombia.

6. Con respecto al marco normativo y conceptual de la determinación de zonas compatibles con la minería, la dirección de Asuntos Sectorial y Urbano señaló que de conformidad con el artículo 61 de la Ley 99 de 1993 corresponde al Ministerio determinar las zonas en las cuales exista compatibilidad con las explotaciones mineras; con base en ello la CAR otorgará o negará las correspondientes licencias ambientales.

7. Entre 2009 y 2010 se realizó el estudio base contratado con el IDEAM con el objeto de proponer un ordenamiento ambiental regional del sector minero, a partir de la zonificación de la compatibilidad ambiental de la Sabana de Bogotá con la minería explotada en ella. La Resolución 1197 fue declarada parcialmente nula por sentencia 30987 de 2010.

8. La nueva reglamentación del artículo 61 se orienta a la ejecución del estudio técnico base, contrato interadministrativo No. 172 de 2009 IDEAM- 895 de 2009 MAVDT, para redefinir las zonas ambientalmente compatibles con la minería en la Sabana de Bogotá; formulación de la propuesta normativa: se formuló y ajustó entre diciembre de 2010 y abril de 2011, con el fin de reglamentar con arreglo a una zonificación de compatibilidad ambiental de la Sabana de Bogotá con la actividad minera.

El 26 de julio de 2010, se remitió al Ministerio de Minas

Expediente No. 25000-23-27-000-2001-0479-01  
Acumulados Nos. 2000-0428, 2001-0122, 2001-0343  
Actor: GUSTAVO MOYA ÁNGEL Y OTROS  
Acción Popular

y Energía el estudio técnico para su concepto previo como lo dispuso la Ley 1382 de 2010. El Ministerio de Minas devolvió el concepto el 16 de diciembre de 2011, el cual es objeto de estudio en la actualidad para ser tenido en cuenta en la propuesta normativa.

9. En cumplimiento de la sentencia del Tribunal sobre el río Bogotá se han reportado a la Contraloría General de la República las acciones relativas a la reglamentación de la actividad minera en la Sabana de Bogotá.

10. Medidas adoptadas problemática ambiental impactos no mitigados explotaciones mineras:

Tabio-vereda Río Frío. Minería de gravas. El MADS consultó los expedientes mineros con títulos del área y requirió a la CAR sobre su estado de licenciamiento, medidas de mitigación llevadas a cabo por el concesionario y volumen anual extraído por cada título.

Tocancipá, visita de campo a las canteras de arena del municipio, se requirió a la Secretaría Ambiental del Municipio para realizar acopio de la información documental y verbal de las quejas de la comunidad.

Formulación del Proyecto para el análisis y recomendaciones sobre los instrumentos ambientales de control de la actividad minera con fundamento en las quejas de la comunidad, con recursos de la banca multilateral.

11. Destacó que si bien es obligación del Estado

Expediente No. 25000-23-27-000-2001-0479-01  
Acumulados Nos. 2000-0428, 2001-0122, 2001-0343  
Actor: GUSTAVO MOYA ÁNGEL Y OTROS  
Acción Popular

preservar el medio ambiente, también corresponde a la comunidad cumplir con el deber de preservarlo para lograr una relación armónica con la naturaleza hasta hoy despreciada y crecientemente devastada. Propone una reforma tributaria para afectar a aquellos que consumen combustibles fósiles, generan polución y CO<sub>2</sub>, y destruyen el hábitat y los ecosistemas, lo cual generaría a su vez, investigación, inversión y producción, en vez de castigar a quienes trabajan y no eximir por contaminar y destruir.

12. Concluyó que todas y cada una de las acciones adelantadas por las entidades públicas y privadas vinculadas a este proceso, perderán su razón de ser, si ellas son incapaces de lograr acuerdos racionales sobre el uso de recursos comunes o incapaces de reforzarlos.

#### **VIII.6.12. EL MINISTERIO DE HACIENDA Y CRÉDITO PÚBLICO (fl. 13425)**

Presentó sus alegatos de conclusión en los siguientes términos:

- Solicitó modificar la sentencia de primera instancia en lo que hace al Ministerio de Hacienda y Crédito Público en el sentido que las conminaciones contenidas en el fallo sean revocadas, y en su lugar se reconozca que la Nación, a través del Ministerio ha atendido sus obligaciones y en caso de confirmarse la decisión sean consideradas dentro del marco de las funciones y deberes de la cartera para que las mismas no desborden las normas que orientan sus actividades.

Expediente No. 25000-23-27-000-2001-0479-01  
Acumulados Nos. 2000-0428, 2001-0122, 2001-0343  
Actor: GUSTAVO MOYA ÁNGEL Y OTROS  
Acción Popular

- El Ministerio no fue objeto de condena directa sino de conminaciones que pueden clasificarse así:

A) Relacionadas con la transferencia de recursos por concepto de regalías y Ley 715.

1) Numeral 6.16.3 del fallo. La observancia de sus obligaciones respecto de transferencias por concepto de regalías a los municipios vinculados y al D.C., representado en la EAAB, para lo cual "(...)deberán realizar las correspondientes reservas de los dineros por concepto de REGALÍAS, cancelando las que se causaron y que fueron objeto de reclamo por parte de los entes territoriales que hasta la presente se les adeudan, debiendo proceder a realizar las correspondientes apropiaciones en el presupuesto de gastos del FONDO NACIONAL DE REGALÍAS, para continuar cumpliendo de manera oportuna y sin dilaciones las transferencias por este concepto a los municipios como al Distrito Capital, por cuanto cualquier retardo incidirá en la ejecución de las obras que con tales recursos se proyecten(...)".

2) Literal V punto 3 parte resolutive. Transferencias por concepto de Ley 715 "Así también, dicho Ministerio deberá realizar las transferencias de Ley 715 correspondientes al 41% del Propósito General a los municipios de la Cuenca Alta, Media y Baja del río Bogotá, como al Distrito Capital; (...)".

3) En lo que hace referencia al Distrito Capital, representado para el efecto por la EAAB, señaló la

Expediente No. 25000-23-27-000-2001-0479-01  
Acumulados Nos. 2000-0428, 2001-0122, 2001-0343  
Actor: GUSTAVO MOYA ÁNGEL Y OTROS  
Acción Popular

sentencia que frente a las obligaciones de ejecutar la construcción del interceptor Tunjuelo-Canoas para lo cual la EAAB no lo tiene proyectado en sus tarifas, el D.C. deberá hacer una transferencia de recursos superior al 30% del 41% del Propósito General, de tal forma que alcance a cubrir su terminación. "Para tales efectos se conminará a la Nación-MINISTERIO DE HACIENDA Y CRÉDITO PÚBLICO para que cumpla en forma oportuna y sin dilaciones con la obligación de transferir al distrito los recursos de la Ley 715 del Propósito General"

B) Relacionadas con la obtención de créditos por parte de la EAAB para atender la ejecución de obras

1) Dispone la sentencia en el literal c del punto V de la parte resolutive que *"teniendo en cuenta la magnitud de las obras que la EAAB está emprendiendo y debe ejecutar en un lapso que no puede sobrepasar al año 2009, se requiere para la aprobación de los correspondientes créditos, que la NACIÓN preste su aval a la empresa en orden a obtenerlos, que como se previó para el Contrato 015 pueden acudir a la pignoración de tales rentas proyectadas en los años según el precio de las mismas, que permita la pronta consecución de los recursos con los que deben ejecutarse las obras"*.

2) Con relación a los eventuales contratos de empréstito que celebre la EAAB con el aval de la Nación, dispuso que: *"El pago de los réditos de la deuda se hará con cargo a los recursos de la Nación teniendo en cuenta que todos las entidades demandadas han cohonestado con su actuar omisivo a*

Expediente No. 25000-23-27-000-2001-0479-01  
Acumulados Nos. 2000-0428, 2001-0122, 2001-0343  
Actor: GUSTAVO MOYA ÁNGEL Y OTROS  
Acción Popular

*la agravación del daño ecológico como ampliamente ha quedado analizado en esta sentencia, por lo que todas deben contribuir con sus recursos a la restauración de las fuentes de agua afectadas tal y como lo prevé el artículo 34 de la Ley 472 de 1998 (...)"*

C) Posición del Ministerio y argumentos.

Consideró pertinente hacer las siguientes precisiones:

Conminación es una conjunción del verbo conminar, que significa requerir a alguien el cumplimiento de un mandato, bajo pena o sanción determinadas. Razón por la cual estimó que las conminaciones hechas en la sentencia deben entenderse como un requerimiento para el fiel cumplimiento de sus funciones frente a los recursos que maneja y recibe en nombre de la Nación y su transferencia a las entidades territoriales y descentralizadas beneficiarias de los mismos, en cuanto a las dos primeras atrás expuestas o a participar como garante de los contratos de empréstitos internacionales, siempre y cuando se enmarquen dentro de sus funciones y se llenen los requisitos exigidos en la ley para cada caso particular.

Así en relación con la conminación relacionada con la transferencia de recursos por concepto de regalías y Ley 715, en momento alguno se demandó el incumplimiento del Ministerio de Hacienda y Crédito Público en la transferencia de los recursos a favor de los municipios y del D.C. por concepto de regalías y de Ley 715, que hayan

Expediente No. 25000-23-27-000-2001-0479-01  
Acumulados Nos. 2000-0428, 2001-0122, 2001-0343  
Actor: GUSTAVO MOYA ÁNGEL Y OTROS  
Acción Popular

dado lugar al incumplimiento de las actividades de dichos entes territoriales y de la EAAB en las obras a su cargo, cuya omisión se tiene como causa determinante del detrimento y actual estado de contaminación del río Bogotá.

Tal como se acreditó en el proceso, entre 1999 y 2003 se transfirieron \$36.448.408.955 por concepto de regalías, con cargo a los recursos del Fondo Nacional de Regalías para la conservación y descontaminación del río Bogotá.

En el mismo sentido, dentro de los recursos que transfiere la Nación por concepto de Sistema General de Participaciones correspondientes a Propósito General, el Ministerio ha girado y continúa girando en forma oportuna al D.C. como a los restantes municipios, por lo que entiende que la conminación es una invitación a mantener la tónica de cumplimiento. Para acreditar que en el periodo 2004-2012, el Ministerio ha girado por concepto del Sistema General de Participaciones -Propósito General- al DC lo que por ley le corresponde, para lo cual adjunta reporte de los pagos realizados.

En cuanto a la participación como garante en los contratos de empréstito que requiera la EAAB y el pago de los réditos de dicha deuda por parte de la Nación, observó:

- 1) Todo aval está sujeto a las exigencias y requisitos técnico-legales necesarios para la suscripción de créditos con garantía de la Nación deberá sujetarse al lleno de los requisitos, en especial lo dispuesto

Expediente No. 25000-23-27-000-2001-0479-01  
Acumulados Nos. 2000-0428, 2001-0122, 2001-0343  
Actor: GUSTAVO MOYA ÁNGEL Y OTROS  
Acción Popular

en el Decreto 2681 de 1993, luego no es viable atender la conminación en su tenor literal contenido en la sentencia del Tribunal Administrativo de Cundinamarca.

- 2) La Nación viene siendo garante en otros contratos de empréstito que algunas entidades condenadas en este proceso vienen proyectando para atender la ejecución de las obras a su cargo dentro del programa de descontaminación del río Bogotá, razón por la cual estima deberá en el fallo coordinar el uso de los dineros obtenidos por transferencias y por créditos en una forma integral, para que no continúe ocurriendo lo que hasta ahora: una gran cantidad de recursos destinados por todas las entidades territoriales y descentralizadas del orden departamental y distrital a programas de descontaminación del río Bogotá, en forma descoordinada sin resultados positivos y definitivos a pesar de llevar más de quince años de trabajo en este frente.
- 3) Consideró que de usarse en forma eficiente estos recursos, estableciendo los costos reales para la culminación de las obras conocidas como Planta Elevadora de Canoas, Planta de Tratamiento de Canoas e interceptor Canoas-Alicachín para finalmente poder determinar la necesidad de los recursos a través de créditos e iniciar los estudios y trámites correspondientes a su obtención y a la participación de la Nación como garante de los contratos de empréstito respectivos.

Expediente No. 25000-23-27-000-2001-0479-01  
Acumulados Nos. 2000-0428, 2001-0122, 2001-0343  
Actor: GUSTAVO MOYA ÁNGEL Y OTROS  
Acción Popular

4) En cuanto al pago de los réditos de la deuda, que dispone la sentencia se hará con cargo a los recursos de la Nación, resalta:

El Ministerio no fue condenado por omisión en relación con la transferencia de los recursos, es decir que la ausencia de ejecución y la falta de obras tendientes al manejo ambiental de la cuenca y a la descontaminación del río Bogotá, no tienen su origen en la falta de recursos del orden nacional ni en la oportuna y puntual puesta a disposición de los dineros por concepto de regalías y otras transferencias que por ley compete a la Nación-Ministerio de Hacienda y Crédito Público.

Corresponde a la EAAB asumir los costos de la construcción y ejecución de las obras vinculadas a la PTAR Canoas, ya sea con recursos propios, recursos transferidos por el DC o de empréstitos y no con cargo a los recursos de la Nación.

La manifestación contenida en el literal d) del punto quinto de la sentencia no tiene fundamento legal, puesto que los casos en que se permite a la Nación asumir deudas de empresas estatales, cualquiera que sea su orden territorial, es en los eventos de saneamiento financiero o producto de la liquidación administrativa de empresas estatales.

Finalmente afirmó que la aplicación de los principios y fundamentos del Estado social de Derecho consagrados en la Constitución Política, no debe limitarse exclusivamente a la Nación sino que deben aplicarse y

Expediente No. 25000-23-27-000-2001-0479-01  
Acumulados Nos. 2000-0428, 2001-0122, 2001-0343  
Actor: GUSTAVO MOYA ÁNGEL Y OTROS  
Acción Popular

exigirse a las entidades territoriales y a las empresas públicas del orden distrital y municipal, más aún cuando los programas de descontaminación del Río Bogotá corresponden al D.C. y a su EAAB, entidades con la suficiente capacidad técnica y financiera para no solamente apropiarse los recursos para la PTAR Canoas, sino para exigirles un manejo eficiente de los mismos.

**VIII.6.13. LAS SOCIEDADES ALPINA, ETERNIT, LÍQUIDO CARBÓNICO, SOCIEDAD CRISTALERÍA PELDAR, REFISAL, CERVECERÍA LEONA Y DIACO (fls.13435 a 13437)**

Reiteraron los argumentos ya reseñados.

**VIII.6.14. SARA MARIELA PÁRRAGA DE MOYA (fls. 13451 a 13465)**

En su calidad de sucesora procesal del demandante Gustavo Moya Ángel, solicitó se revoque el numeral décimo primero de la parte resolutive de la sentencia, que fijó como incentivo 50 SMLMV y negó las demás indemnizaciones y en su lugar se ordenó dar aplicación al incentivo previsto en el inciso segundo del artículo 1005 del Código Civil, es decir una suma que no baje de la décima, ni exceda de la tercera parte de lo que cueste la demolición o enmienda, o el resarcimiento del daño, en razón a que la acción fue promovida el 1º de octubre de 1992 y que el incentivo debe correr a cargo de la empresa de Energía de Bogotá, EMGESA S.A. y CODENSA quienes son solidariamente responsables con dicho pago y no a cargo de las entidades a que se refiere el numeral 6.23.1 de la parte motiva de

Expediente No. 25000-23-27-000-2001-0479-01  
Acumulados Nos. 2000-0428, 2001-0122, 2001-0343  
Actor: GUSTAVO MOYA ÁNGEL Y OTROS  
Acción Popular

la sentencia apelada.

En segundo lugar solicitó reformar el numeral primero de la parte resolutive de la sentencia y en su lugar se disponga que se declare solidariamente responsable, por acción u omisión a la Empresa de Energía de Bogotá, a EMGESA S.A. y a CODENSA S.A. como consecuencia de los vertimientos y almacenamiento de las aguas negras sobre el Embalse del Muña.

En tercer lugar se confirme la parte resolutive de la sentencia en los restantes numerales.

Llamó la atención en el sentido de tener en cuenta que el daño causado al medio ambiente por la Empresa de Energía de Bogotá, no se sustenta en la notoria y sabida contaminación que presentan las aguas del río Bogotá con que se nutre la represa, sino en el bombeo y almacenamiento de estas aguas sin el lógico y debido tratamiento previo.

Adujo que no puede confundirse el objeto de la acción popular, en tanto que no busca la descontaminación del río Bogotá, sino la realización de las obras necesarias por parte de la EEB, para que previamente a verter y almacenar las aguas en el Embalse del Muña, las descontamine a través de una planta de tratamiento de agua y luego las vierta y almacene en el embalse, de tal manera que se evite la contaminación que ha venido aportando dicha fuente hídrica.

Complementó su memorial en escrito obrante a folios 13845

Expediente No. 25000-23-27-000-2001-0479-01  
Acumulados Nos. 2000-0428, 2001-0122, 2001-0343  
Actor: GUSTAVO MOYA ÁNGEL Y OTROS  
Acción Popular

a 13871, para reiterar que se declare la responsabilidad de EMGESA con el objeto de que realice las obras necesarias para el tratamiento de las aguas del Embalse del Muña, pues a su juicio, las obras realizadas son muy pocas y el Río continúa contaminado.

Reiteró igualmente la solicitud de condenar en costas y a pagar los perjuicios a la parte demandada hoy EMGESA. Anexó el informe de visita realizada al río Bogotá el 18 de febrero de 2013.

#### **VIII.6.15. El IGAC (fls. 13466 a 13469)**

A través de apoderado judicial señaló que por tratarse de un organismo eminentemente técnico, cuyo objeto es cumplir con el mandato constitucional relativo a la elaboración y actualización del mapa oficial de la República, desarrollar las políticas y ejecutar los planes del Gobierno Nacional en materia de cartografía, agrología, catastro y geografía, no está llamado a ser demandado en el presente proceso ya que la contaminación del río Bogotá no es un asunto en el que la entidad haya tenido injerencia, ni por acción ni por omisión.

Adujo que dentro de sus funciones está el realizar operaciones de deslinde y amojonamiento de entidades territoriales, por lo tanto no es de su competencia ejecutar acciones en relación con las rondas de los ríos. Si bien colabora con las autoridades ambientales en el suministro de información y experticias técnicas que le soliciten para la ejecución de planes y programas

Expediente No. 25000-23-27-000-2001-0479-01  
Acumulados Nos. 2000-0428, 2001-0122, 2001-0343  
Actor: GUSTAVO MOYA ÁNGEL Y OTROS  
Acción Popular

asignados a las entidades, no significa que el Instituto demandado tenga responsabilidad por las acciones u omisiones de las entidades que manejan el tema ambiental, como el Ministerio del Medio Ambiente, las Corporaciones Autónomas Regionales y los entes territoriales.

Tampoco la entidad efectúa procesos que originen vertimientos de residuos contaminantes al río Bogotá causantes del deterioro ambiental, tampoco realiza obras públicas que afecten o puedan afectar el ecosistema que lo circunda.

En estos términos consideró están dados los presupuestos para declarar la excepción de falta de legitimación en la causa por pasiva respecto del IGAC.

#### **VIII.6.16. LA CAR (fls. 13470 a 13504)**

Puso de presente la normativa expedida con posterioridad a la sentencia así como los desarrollos fácticos que ha tenido el proceso de descontaminación del río Bogotá para reiterar que lo que respecta a la CAR y sus competencias legales y constitucionales, continúan vigentes los reparos jurídicos expuestos al apelar la sentencia de primera instancia razón por la cual solicitó tenerlos como parte integral del alegato y para no repetir se limita a llamar la atención sobre la actividad desarrollada por la CAR en el interregno, así como tener en cuenta los oficios radicados por la entidad el 30 de noviembre y el 5 de diciembre de 2012, en respuesta al requerimiento de información realizado por el Despacho

Expediente No. 25000-23-27-000-2001-0479-01  
Acumulados Nos. 2000-0428, 2001-0122, 2001-0343  
Actor: GUSTAVO MOYA ÁNGEL Y OTROS  
Acción Popular

del Consejero mediante proveído de 15 de noviembre de 2012.

En consecuencia, precisó, quedará demostrado cómo la descontaminación del río Bogotá, ocupa sin duda la atención y acción de la CAR bajo una política pública delineada muy particularmente en el Documento Conpes 3320 de 6 de diciembre de 2004 y en la que se avanza a través del convenio 171 de 2007. Dicha Política Pública corresponde ser desarrollada armónica y coordinadamente por cada una de las diversas autoridades dentro del marco de sus competencias.

En estos términos presentó como estructura temática de los alegatos:

1.- Reiteración de las consideraciones legales expuestas como argumento de la apelación: ilegalidad por la aprobación de pactos de cumplimiento inexistentes, por delegación indebida del juez de conocimiento, por aprobación de pactos parciales, por indebida imposición de cargas a la CAR, relativas a la restauración morfológica del suelo y creación de una red hidrometereológica, así como las obligaciones impuestas derivadas de la "*solución técnica integral*": construcción de la PTAR Canoas y ampliación de la PTAR Salitre, dragado del Río; destinación de los recursos a que se refiere el artículo 45 de la Ley 99 de 1993 a la operación y mantenimiento de la PTAR Canoas; en cuanto a la aprobación de los pactos de cumplimiento obligaciones relacionadas con los proyectos de "*Producción más limpia*", a la "*transferencia de recursos del sector*

Expediente No. 25000-23-27-000-2001-0479-01  
Acumulados Nos. 2000-0428, 2001-0122, 2001-0343  
Actor: GUSTAVO MOYA ÁNGEL Y OTROS  
Acción Popular

*eléctrico para la operación y mantenimiento del Embalse del Muña y a la reubicación de personas".* En segundo término lo relacionado con los desarrollos fácticos y las conclusiones y solicitud.

En tal contexto señaló que la decisión de primera instancia debe ser revocada en su integridad porque aprueba un pacto que no existió, y en caso de existir éste sería parcial y su aprobación por lo tanto ilegal, pues modificó los acuerdos originales sin el consentimiento de las partes y adoptó una decisión híbrida en tanto el proceso finalizó por un supuesto pacto de cumplimiento parcial y una decisión de fondo con la cual se desconoce el orden público, toda vez que todo proceso de acción popular debe culminar con aprobación de un pacto de cumplimiento o con una sentencia de fondo, no con la suma de ambas figuras.

En cuanto a las obligaciones impuestas por incumplimiento de disposiciones constitucionales y legales, contenida en el numeral 3 literal e) de la parte resolutive, se ordena a la Car exigir a los entes públicos y privados que gozan de licencias o autorizaciones para la explotación minera, la restauración morfológica del suelo en un lapso de cuatro meses contados a partir del momento del requerimiento so pena de la revocatoria o suspensión de los permisos o licencias concedidos.

Esta disposición en su criterio resulta contraria al ordenamiento jurídico por dos razones: -Desconoce el debido proceso y la carga impuesta tiene origen en un proceso del que no son parte y establece un plazo corto

**Expediente No. 25000-23-27-000-2001-0479-01**  
**Acumulados Nos. 2000-0428, 2001-0122, 2001-0343**  
**Actor: GUSTAVO MOYA ÁNGEL Y OTROS**  
**Acción Popular**

que no atiende a las complejidades de la actividad que se debe ejecutar, e impone una obligación no prevista para ser ejecutada en la etapa actual de su actividad minera.

- La orden de restauración morfológica del suelo dirigida a los titulares de autorizaciones y licencias contraviene las disposiciones contenidas en los artículos 58 y 62 de la Ley 99 de 1993 y el Decreto 1200 de 2004 y la Ley 1333 de 2009, normas que regulan el trámite para el otorgamiento, modificación y revocatoria de las licencias ambientales, así como el procedimiento sancionatorio. Ordenar a los titulares de licencias o autorizaciones la realización de actividades de restauración morfológica del suelo en un término de cuatro meses, implica una modificación en los términos de la licencia original cuando además se trata de una obligación que sólo debe ser cumplida al final de la misma, y por otra, un cambio de imposible cumplimiento que puede impedir el desarrollo de las actividades autorizadas, convirtiendo la licencia en inocua e inejecutable.

Respecto de la creación de una red hidrometeorológica, orden contenida en el numeral tercero literal i) de la parte resolutive, que implica la entrega del manejo y operación de la red hidrometeorológica de la CAR al IDEAM, así como el aporte recursos para la constitución de un fondo común destinado al mantenimiento de la misma, solicitó sea revocada.

La orden implica, a su juicio, una especie de expropiación de unos bienes de propiedad de la entidad estatal a favor de otra, lo cual no tiene justificación ni sustento legal alguno; si bien es cierto en la

Expediente No. 25000-23-27-000-2001-0479-01  
Acumulados Nos. 2000-0428, 2001-0122, 2001-0343  
Actor: GUSTAVO MOYA ÁNGEL Y OTROS  
Acción Popular

actualidad la CAR cuenta con una red hidrometeorológica de su propiedad con más de cien estaciones de monitoreo a lo largo del río Bogotá, la cual según la orden debe poner a disposición del IDEAM de manera gratuita, no sólo se causaría un desmedro al patrimonio de la CAR, sino que haría que dicha entidad, cuyas funciones legales le obligan a concentrarse, entre otras, en la cuenca del río Bogotá, perdiera la posibilidad de manejar una red altamente especializada y concentrada en el control de aguas en su jurisdicción con desconocimiento de su experiencia.

Las obligaciones impuestas a la CAR, derivadas de la solución "Técnica Integral", consistente en la ampliación de la PTAR Salitre y la construcción de la PTAR Canoas, la cual ni es realmente solución ni corresponde a la realidad de las cosas, pues no es el resultado de estudios serios y concretos sobre el tema, ni de consensos logrados en la mesa técnica ya que la CAR jamás manifestó su consentimiento ni aprobación de los denominados pactos de cumplimiento, ni tampoco con ninguna de las alternativas propuestas.

Solicitó, por lo tanto, revocar el numeral quinto literal c) de la sentencia, en virtud del cual la CAR debe aportar para la construcción de la PTAR Canoas a ejecutarse en el Municipio de Soacha, parte de los recursos que recibe de las transferencias de la sobretasa del impuesto predial efectuada por el D.C., previa deducción de los recursos que se deben destinar par la ampliación de la PTAR Salitre. Ello en razón a que en su criterio el juez de la acción popular irrumpió en la

**Expediente No. 25000-23-27-000-2001-0479-01**  
**Acumulados Nos. 2000-0428, 2001-0122, 2001-0343**  
**Actor: GUSTAVO MOYA ÁNGEL Y OTROS**  
**Acción Popular**

órbita de competencia exclusiva de la administración, vulnerando no solo el principio de separación de poderes, pilar del estado social de derecho sino las disposiciones que establecen los parámetros que deben seguir las autoridades en materia de planificación ambiental. Ello unido a la conveniencia del proyecto y la disponibilidad presupuestal, debiendo estar previamente contempladas en las diferentes herramientas de planificación ambiental.

En estos términos, el Decreto 1200 de 2004, vigente para la fecha de expedición de la sentencia, estableció como herramientas de la planificación regional de las Corporaciones autónomas: el Plan de Gestión Ambiental-PGAR, el Plan de Acción Trienal (PAT) y el Presupuesto de Rentas y Gastos. Con lo cual el Tribunal de instancia desconoce el ámbito de competencia de la administración para decidir los proyectos en los cuales debe intervenir.

En cuanto al dragado del Río, orden contenida en el numeral cuarto literal h) de la parte resolutive y el acápite 6.18 de la parte motiva del fallo, con cargo a los recursos, entre otros de la CAR, consideró que viola el artículo 113 de la Carta, en cuanto implica una injerencia indebida del juez en el ámbito discrecional técnico de la Administración, más aún cuando la CAR cuenta con un plan de dragado diseñado científicamente y sectorizado a lo largo de la cuenca del río Río y en ejecución. La sentencia modifica la forma de efectuar dicho dragado contrariando la competencia asignada a la CAR y en particular el principio de especialidad de la administración previsto en la Ley 489 de 1998, artículo 68 y de conformidad con el artículo 10 numeral 20 de los

Expediente No. 25000-23-27-000-2001-0479-01  
Acumulados Nos. 2000-0428, 2001-0122, 2001-0343  
Actor: GUSTAVO MOYA ÁNGEL Y OTROS  
Acción Popular

Estatutos de la Car.

En relación con la destinación de recursos a que se refiere el artículo 45 de la Ley 99 de 1993 a la operación y mantenimiento de la PTAR Canoas, orden contenida en el numeral quinto literal d) en virtud de la cual la CAR debe aportar parte de los recursos que percibe por transferencias del sector eléctrico para la operación y mantenimiento de la PTAR, precisó que resulta contraria a lo dispuesto en el artículo 45 de la Ley 99 de 1993, el Decreto 1933 de 1994 y el Decreto 1729 de 2002, según los cuales la principal destinación de las transferencias del sector eléctrico es la relativa a la protección de las cuencas hidrográficas, a través de la elaboración del Plan de Ordenación de la Cuenca Hidrográfica. Resaltó además que es de competencia exclusiva de la CAR establecer las directrices bajo las cuales se efectuará el manejo de las Cuencas Hidrográficas localizadas dentro del área de su jurisdicción según lo prevé el numeral 18 del artículo 10 de los Estatutos de la entidad.

Agregó que la ley fue enfática al disponer que los recursos a que hace referencia la citada disposición, sólo podrán destinarse hasta el 10% a gastos de funcionamiento, norma cuyo alcance fue establecido por la Sala de Consulta y Servicio Civil en consulta de 31 de octubre de 2001, radicación 1457, MP César Hoyos Salazar.

En cuanto a las obligaciones derivadas de la supuesta aprobación de los Pactos de Cumplimiento, en primer término señaló que nunca se configuró el citado pacto,

Expediente No. 25000-23-27-000-2001-0479-01  
Acumulados Nos. 2000-0428, 2001-0122, 2001-0343  
Actor: GUSTAVO MOYA ÁNGEL Y OTROS  
Acción Popular

pues no existió por parte de la CAR, entre otros demandados manifestación del consentimiento necesario para dicha aprobación, razón por la cual las órdenes impartidas con fundamento en ellos deben ser revocadas.

En relación con los Proyectos de Producción más limpia, numeral tercero literal 11), precisó que corresponderá a la CAR coordinar y cofinanciar los proyectos de producción más limpia, incluyendo las obras de infraestructura que requieran dichos proyectos así como la obligación de subsidiar los planes de vivienda de aquellos habitantes que se ubican en la zona de ronda del río Bogotá con necesidades básicas insatisfechas, funciones que corresponden a las asignadas legalmente a la CAR, lo que implicaría una extralimitación en el ejercicio de competencias y el desconocimiento del artículo 6º superior.

Expuso que la forma como deben ser implementados los programas de producción más limpia, implica una injerencia indebida en el ámbito de competencia de la administración y particularmente de la CAR, autoridad facultada para establecer la forma como se han de ejecutar los diferentes programas para la protección del medio ambiente. En este sentido resaltó que el Plan de Gestión Ambiental Regional (PGAR), previó la ejecución de un Proyecto de Producción más Limpia, el cual se ha cumplido a cabalidad.

Con relación a las obligaciones relativas a la transferencia de recursos del sector eléctrico para la operación y mantenimiento del Embalse del Muña, contenida

Expediente No. 25000-23-27-000-2001-0479-01  
Acumulados Nos. 2000-0428, 2001-0122, 2001-0343  
Actor: GUSTAVO MOYA ÁNGEL Y OTROS  
Acción Popular

en el numeral cuarto literal f) en virtud del cual se ordena a la Car destinar a partir de 2009 un porcentaje de los recursos provenientes de las transferencias del sector eléctrico para la operación y mantenimiento de las obras del Embalse del Muña, previo descuento del giro para la operación y mantenimiento de la PTAR Canoas, adujo que la misma resulta contraria al artículo 113 superior y atenta contra las normas de planificación en materia ambiental, por cuanto es competencia exclusiva de la CAR determinar las condiciones y proyectos en que deben invertirse los recursos y, por lo tanto, escapa a la competencia del juez popular.

De otra parte, agregó que el juez desconoció la política de la CAR en lo referente al manejo del embalse y la relación con EMGESA, vulnerando con ello el principio de separación de poderes.

Respecto de la reubicación de personas, orden contenida en el numeral tercero literal e) se impone a la CAR la obligación de reubicar en los demás complejos mineros a las personas con necesidades básicas insatisfechas que lavan arenas en el río Tunjuelo, precisó que no es función que corresponda a la CAR, en tanto que se trata de una atribución exclusiva del MAVDT, razón por la cual dicha orden resulta contraria a lo dispuesto en los artículos 6 y 113 de la Carta Política.

#### **Desarrollos fácticos:**

La CAR pretende demostrar que tiene estructuradas las gestiones que corresponden frente a la cuenca del río

**Expediente No. 25000-23-27-000-2001-0479-01**  
**Acumulados Nos. 2000-0428, 2001-0122, 2001-0343**  
**Actor: GUSTAVO MOYA ÁNGEL Y OTROS**  
**Acción Popular**

Bogotá, conforme a los diseños establecidos de manera técnica, efectiva y eficiente, en armonía con otras entidades que deben participar en esta gestión, con los recursos asignados para el efecto y con la debida financiación de acuerdo con las condiciones de la Corporación.

1.- Suscribió el Convenio ATN/OC-10208-CO con el BID cuyo objeto fue obtener los recursos de cooperación técnica para la elaboración de los estudios de preinversión para la preparación del Programa de Manejo Ambiental de la Cuenca del río Bogotá en jurisdicción de la CAR, complementado con una contrapartida de la misma entidad.

Con fundamento en los estudios elaborados se recomendó la ejecución de obras prioritarias, las cuales fueron concertadas para ser llevadas a nivel de diseño de detalle y ser desarrolladas en el componente denominado "Diseños Específicos de Ingeniería", con base en ellos se suscribieron los contratos 735 de 2009 que incluyó la ampliación y mejora de las plantas de Bojacá, Cogua, Guatavita, Nemocón, Sesquilé, Sopó, Subachoque, Suesca, Tabio y Zipaquirá y la construcción de nuevas plantas en Chía, Cota, El Colegio, Villapinzón y Zipacón, con un presupuesto de \$132.813.000.000 y el contrato 543 de 2010, COA 6925-BID, que incluyó la ampliación y mejora de las Plantas de Anapoima, Facatativá, Funza, Madrid, Mosquera, Tena; la construcción de nuevas plantas en Agua de Dios, Anolaima, Apulo, Facatativá, Girardot, La Mesa, Mosquera, Ricaurte, San Antonio del Tequendama, Tocaima y Viotá con un presupuesto de \$52.481.000.000 y en la actualidad los municipios se encuentran presentando

**Expediente No. 25000-23-27-000-2001-0479-01**  
**Acumulados Nos. 2000-0428, 2001-0122, 2001-0343**  
**Actor: GUSTAVO MOYA ÁNGEL Y OTROS**  
**Acción Popular**

proyectos a la Corporación para su cofinanciación con base en los diseños desarrollados y los entes municipales deberán gestionar recursos ante otras entidades competentes en la materia.

Igualmente en el marco del Documento Conpes 3320 se suscribió el convenio 171 de 2007 para la recuperación del río Bogotá y la prevención de inundaciones del Distrito Capital entre la CAR la Secretaría Distrital de Ambiente y la Empresa de Acueducto y Alcantarillado de Bogotá.

Adicional al Documento Conpes 3320, en atención al Plan de Acción Trianual 2007-2009 y su actualización al año 2011, se tiene proyectado realizar obras de adecuación hidráulica sobre la Cuenca Media del río Bogotá, en un tramo de 68 km, comprendido entre las puertas de Alicachín en el Municipio de Soacha y Puente La Virgen en el Municipio de Cota, cuyo objetivo es transformar el río Bogotá, mediante la ampliación de su capacidad hidráulica para lograr la reducción de los riesgos por inundación, el mejoramiento de los drenajes de las zonas bajas de la ciudad y la creación de áreas multifuncionales a lo largo del Río, recuperando este recurso hídrico como un activo para la región y para la ciudad de Bogotá.

Puso de presente que a la fecha de presentación de los alegatos (15 de febrero de 2013), cuenta con los diseños de detalle de las obras a ejecutar y adjudicado los procesos licitatorios tanto de obras como de interventoría del Tramo 1, que corresponden a los primeros 40 kms entre Alicachín y el Km 40 antes del

**Expediente No. 25000-23-27-000-2001-0479-01**  
**Acumulados Nos. 2000-0428, 2001-0122, 2001-0343**  
**Actor: GUSTAVO MOYA ÁNGEL Y OTROS**  
**Acción Popular**

barrio Porvenir (mpio. de Mosquera).

En desarrollo del Convenio se adelanta el proyecto de adecuación hidráulica y recuperación ambiental del río Bogotá que está integrado por cuatro componentes: i) Ampliación y optimización de la planta de tratamiento de aguas residuales -PTAR Salitre; ii) Adecuación hidráulica y mejoramiento ambiental; iii) Estudios para el manejo integrado de la cuenca y iv) Administración y gerencia, que incluye salvaguardas ambientales y sociales. Agrega que se incluyó en el Convenio, como parte integral de la adecuación hidráulica y recuperación ambiental del río Bogotá, la construcción de la PTAR Canoas, Convenio 171 de 2007, corresponde a la EAAB.

El proyecto a la fecha se encuentra con cierre financiero y desde 2009 se adelantaron las gestiones ante el Banco Mundial para contar con una operación de crédito externo hasta por la suma de US\$250 millones. La suscripción del contrato contó con el respaldo de la Nación a través del Documento Conpes 3631 de 2009.

Las obras realizadas para la mitigación de las inundaciones a través del Fondo de Inversiones para la Adecuación del río Bogotá (FIAB), son las obras de dragado, refuerzo de jarillones y ampliación del cauce del río Bogotá, entre Alicachín y la desembocadura del río Tunjuelo, en un tramo de 21 Kms., se removieron más de 500.000 m<sup>3</sup> de sedimentos del cauce del Río y la financiación de las obras cuyo valor supera los seis mil millones de pesos corrió por cuenta de la Dirección General del Riesgo, organismo dependiente del Ministerio

Expediente No. 25000-23-27-000-2001-0479-01  
Acumulados Nos. 2000-0428, 2001-0122, 2001-0343  
Actor: GUSTAVO MOYA ÁNGEL Y OTROS  
Acción Popular

del Interior.

La Car asumió la supervisión técnica del proyecto, asesoría técnica y el suministro de todo el soporte requerido. Los refuerzos de los jarillones se realizaron en los puntos de alto riesgo en el Municipio de Mosquera, vereda San Francisco, Soacha, Bosa y Kennedy.

Mediante el contrato 311 de 2010 se realizó limpieza del cauce y refuerzo de jarillones entre el Río Balsillas y el Puente de San Francisco, contrato que se ejecutó con recursos propios de la CAR, por valor de \$2.177.682.801.

La CAR ha implementado bajo las normas del Banco Mundial, el proceso de consultoría y las obras de prevención en la Cuenca Media del Río Bogotá en el sector comprendido entre la calle 13(K41+500)-Puente El Común (K98+200) consistentes en dragado de cauce y disposición del material extraído para el reforzamiento y reconstrucción de jarillones, perfilado de taludes y remoción y disposición de maleza acuática, árboles, ramas y tambres que se encuentren dentro del cauce, por un valor de \$9.000.000.000, obras cuya construcción concluirá en 2015 y su estabilización y entrenamiento en 2016 de conformidad con lo establecido en el Acuerdo 43 de 2006.

La CAR mediante Convenios interadministrativos con varios municipios, ha adelantado procesos cuyo objetivo es contribuir con el saneamiento ambiental de fuentes hídricas. Dentro de estos procesos se encuentran obras como la construcción de unidades sanitarias con su respectivo pozo séptico y campo de infiltración;

**Expediente No. 25000-23-27-000-2001-0479-01**  
**Acumulados Nos. 2000-0428, 2001-0122, 2001-0343**  
**Actor: GUSTAVO MOYA ÁNGEL Y OTROS**  
**Acción Popular**

construido 1122 unidades en 27 municipios con una inversión de siete mil ciento cuarenta y un millones seiscientos catorce mil setecientos ochenta y nueve pesos (\$7.141.614.789) con beneficio para aproximadamente 4.500 personas.

Se gestionaron y aprobaron los Acuerdos 17 y 30 de 2009, mediante los cuales se determina la ronda técnica del Río y se decreta la zona de utilidad pública del proyecto, respectivamente. Ellos permiten adelantar el proceso de rehabilitación ecológica para la consolidación de un corredor de ronda que en un futuro favorezca la conectividad ecológica con otras áreas de vital importancia como los Cerros Orientales y los humedales de la Sabana.

El Proyecto incluye integrar la biodiversidad biológica de la cuenca media del río Bogotá, utilizando más de 80 especies nativas en la reforestación de aproximadamente 597 hectáreas donde se espera plantar alrededor de 280.000 árboles nativos, imitando las condiciones naturales.

La CAR finalizó la entrega de las plantas de tratamiento de aguas residuales -PTAR a los municipios de la Cuenca del río Bogotá, el 7 de octubre de 2012.

Concluyó que es a la CAR como autoridad ambiental a quien corresponde planear su gestión en coordinación con otros entes estatales, dentro de un suficiente margen de discrecionalidad técnica y en atención a su presupuesto.

Expediente No. 25000-23-27-000-2001-0479-01  
Acumulados Nos. 2000-0428, 2001-0122, 2001-0343  
Actor: GUSTAVO MOYA ÁNGEL Y OTROS  
Acción Popular

No le corresponde al juez señalar las directrices de la gestión administrativa sin atender la técnica y especialidad de los organismos administrativos y a su presupuesto.

Con fundamento en ello la CAR diseñó un Plan de Gestión Ambiental Regional (PGAR), en atención a lo señalado en el Plan Nacional de Desarrollo, el Plan de Desarrollo Departamental, el Plan de Desarrollo Municipal, el POT Departamental, el POT municipal y el Plan de ordenamiento de la cuenca.

Para la adecuación hidráulica del río Bogotá la CAR ha atendido las políticas del Gobierno Nacional plasmadas en el Documento CONPES 3320 de 2004, la Ley 99 de 1993, el Acuerdo CAR 43 de 2006 y los Planes Nacionales de Desarrollo 2006-2010 y 2011-2014.

En estos términos solicitó se revoque la sentencia de 25 de agosto de 2004 y su complementaria de 16 de septiembre de 2004. De manera subsidiaria se revoquen el numeral tercero literales e), i) y ll); numeral cuarto literales c), h) y f) y del numeral quinto los literales d) y c).

#### **VIII.6.17. EL DNP Y EL FONDO NACIONAL DE REGALÍAS EN LIQUIDACIÓN (FOLIOS 13516 A 13528)**

Por medio de apoderado judicial, reiteraron los argumentos planteados en el recurso de apelación y, adicionalmente, solicitaron tener en cuenta los siguientes argumentos:

**Expediente No. 25000-23-27-000-2001-0479-01**  
**Acumulados Nos. 2000-0428, 2001-0122, 2001-0343**  
**Actor: GUSTAVO MOYA ÁNGEL Y OTROS**  
**Acción Popular**

1. Sobre la titularidad de los recursos de regalías, de conformidad con los artículos 332, 360 y 361 de la Constitución Política así como la jurisprudencia de la Corte Constitucional, el Fondo hoy en liquidación se debe regir por la legislación anterior a la reforma introducida por el Acto Legislativo 05 de 2011, regulado para la época de la sentencia por la Ley 141 de 1994, modificada por la Ley 756 de 2002, donde se estipula que sus fondos se conformarán con los ingresos provenientes de las regalías no asignadas a los departamentos y municipios productores y a los municipios portuarios de conformidad con la ley, como un sistema de manejo separado de cuentas con personería jurídica cuyos recursos serán destinados de conformidad con el artículo 361 Superior; se le otorga personería jurídica al FNR, se adscribe al Departamento Nacional de Planeación e igualmente se atribuye a la Dirección General del Tesoro Nacional del Ministerio de Hacienda y Crédito Público, el recaudo y administración de sus recursos.

De otro lado la Corte Constitucional se ha pronunciado sobre la autonomía territorial en relación con los recursos de regalías, respecto de lo cual ha reiterado los componentes del núcleo esencial de este derecho, de conformidad con lo preceptuado en el artículo 287 de la Carta Política y ha establecido que el límite impuesto al legislador en esta materia depende del tipo de recursos respecto de los cuales esté legislando, ya que las entidades territoriales cuentan con dos fuentes de financiación: las endógenas y las exógenas y la jurisprudencia ha reconocido que las regalías son recursos provenientes de fuentes exógenas de financiación

Expediente No. 25000-23-27-000-2001-0479-01  
Acumulados Nos. 2000-0428, 2001-0122, 2001-0343  
Actor: GUSTAVO MOYA ÁNGEL Y OTROS  
Acción Popular

sobre las cuales el legislador tiene amplias facultades de intervención.

Colige la Corte que las regalías no son propiedad de las entidades territoriales sino del Estado y que dichos entes sólo tienen sobre aquellos recursos un derecho de participación en los términos que fije la ley.

Las entidades territoriales que no participan de manera directa en las regalías la ley las hace beneficiarias de unas transferencias condicionadas a las cuales solo pueden acceder a través de la presentación de proyectos ante el Fondo Nacional de Regalías, lo que significa que si un municipio no presenta proyectos, difícilmente podría ser acreedor de tales transferencias por este concepto.

## 2.- Debido proceso y principio de legalidad.

Al ser el debido proceso desarrollo del principio de legalidad, aquél representa un límite jurídico al ejercicio del poder político, en la medida en que las autoridades sólo podrán actuar dentro del ámbito de su competencia.

## 3.- Competencias del DNP-Fondo Nacional de Regalías-Principio de legalidad.

Acorde con los artículos 360 y 361 de la Constitución Política y las competencias señaladas en los decretos 3517 de 2009 y 416 de 2007, el Departamento Nacional de Planeación, a través de la Dirección de Regalías, ejerce

Expediente No. 25000-23-27-000-2001-0479-01  
Acumulados Nos. 2000-0428, 2001-0122, 2001-0343  
Actor: GUSTAVO MOYA ÁNGEL Y OTROS  
Acción Popular

las funciones de control y vigilancia sobre la ejecución de los recursos de las regalías directas a que tienen derecho las entidades territoriales beneficiarias y ejecutoras, por adelantarse en su territorio la explotación de recursos naturales no renovables, o ser puertos por donde se transportan dichos productos, a efectos de verificar que la destinación de los recursos se enmarquen dentro de los parámetros establecidos por las normas vigentes, para lo cual contrata o realiza directamente la interventoría administrativa y financiera de los recursos de regalías y compensaciones distinta a la interventoría técnica que debe ser designada o contratada por los entes territoriales beneficiarios según corresponda.

De conformidad con el Decreto 3517 de 2009, modificado por el Decreto 1832 de 2012, se creó el Consejo Asesor de Regalías encargado de determinar las pautas y requisitos que deben cumplir las entidades territoriales beneficiarias y las entidades ejecutoras, para la adecuada utilización de los recursos del FNR y en depósito en el mismo, así como para señalar los criterios de elegibilidad de los proyectos que sean susceptibles de ser financiados o cofinanciados con tales recursos.

Es la ley la única habilitada por el constituyente para realizar una asignación específica de los recursos del FNR. La Ley 141 de 1994, artículo 1º numeral 3º párrafo quinto modificado por el artículo 7 núm. 3 de la Ley 756 de 2002, estableció una asignación con destinación específica dentro del presupuesto del FNR destinada a la financiación de programas y proyectos para la

Expediente No. 25000-23-27-000-2001-0479-01  
Acumulados Nos. 2000-0428, 2001-0122, 2001-0343  
Actor: GUSTAVO MOYA ÁNGEL Y OTROS  
Acción Popular

descontaminación del río Bogotá.

Cuando la partida supere el monto disponible surge la necesidad de realizar un procedimiento previo a la remisión de los proyectos al Consejo Asesor de Regalías, al cual corresponde un ejercicio de priorización que se encuentra previsto en el artículo 5 de la Ley 141 de 1994, los que se reflejan en el Conpes 3523 de 2008 y en la Resolución 757 de 2008.

Agregó que el artículo 119 de la Ley 1151 de 2007, establece que de acuerdo con el artículo 36 de la Ley 756 de 2002, el Gobierno Nacional efectuará las operaciones presupuestales a que haya lugar en el presupuesto del FNR con el fin de distribuir los saldos de apropiación presupuestal que no se encuentren comprometidos a treinta de septiembre, y respecto de los cuales no se hayan presentado los correspondientes proyectos por las entidades beneficiarias ante las instancias nacionales competentes.

Para el acceso a los recursos del FNR, las entidades territoriales como beneficiarias deben presentar los proyectos ante los respectivos ministerios según el sector al que correspondan, en los términos y con el cumplimiento de los requisitos exigidos por el Decreto 416 de 2007 para obtener su viabilidad. Igualmente deben cumplir los requisitos establecidos en los Acuerdos Sectoriales donde se fijan los criterios de elegibilidad, viabilidad, y básicos para la presentación de los proyectos de inversión.

Expediente No. 25000-23-27-000-2001-0479-01  
Acumulados Nos. 2000-0428, 2001-0122, 2001-0343  
Actor: GUSTAVO MOYA ÁNGEL Y OTROS  
Acción Popular

Reiteró que para la ejecución de los recursos provenientes de las regalías y compensaciones, incluidos los mecanismos de contratación, son responsabilidad exclusiva de la entidad territorial beneficiaria y ejecutora de tales recursos, debe cumplir con las disposiciones legales que regulan la materia, el DNP no es parte contractual ni autoridad en la ejecución de los proyectos financiados con las asignaciones del FNR toda vez que debe garantizar su independencia para ejercer la función de control y vigilancia a través de la interventoría administrativa y financiera.

Sobre el trámite del Proyecto de Inversión BPIN 1150030340000 "Construcción de la Estación Elevadora de Aguas Residuales Canoas para el Distrito Capital de Bogotá", hizo las siguientes precisiones:

- Presentado por la Alcaldía Mayor de Bogotá el 29 de noviembre de 2011 al MAVDT, hoy Ministerio de Vivienda, Ciudad y Territorio y remitido como viable a la Dirección Nacional de Regalías con oficio anexo No. 20116630439932, radicado en el DNP el 2 de diciembre de 2011; la alcaldía propuso como entidad ejecutora a la EAAB ESP.
- Cumplidos los requisitos señalados en el Decreto 416 de 2007 y el Acuerdo 026 de 2004, fue aprobado por el Consejo Asesor de Regalías por valor de \$120.215.000.000 con Acuerdo 071 de 28 de diciembre de 2011.
- El Proyecto consiste en la construcción de las obras de ingeniería y complementarias para el suministro, instalación y puesta en funcionamiento de la estación elevadora de aguas residuales de Canoas, contempla las siguientes actividades:

Expediente No. 25000-23-27-000-2001-0479-01  
Acumulados Nos. 2000-0428, 2001-0122, 2001-0343  
Actor: GUSTAVO MOYA ÁNGEL Y OTROS  
Acción Popular

Estructura Central: un pozo circular de 65m de diámetro interno y 58 m de profundidad, se contemplan dos compartimientos independientes, el primero destinado a un sistema de cribado con tres sistemas de rejillas separados de 10, 7 y 2.5 mm en el cual se ha previsto la implementación de un sistema de bypass que permite derivar el caudal hacia el túnel de emergencia. El segundo, es la estación de bombeo propiamente dicha, en el cual se han dispuesto en la primera etapa 5 bombas no sumergibles de pozo seco y de eje horizontal con una capacidad de bombeo de 5.5 m<sup>3</sup> /s cada una para un caudal bombeado de 22m<sup>3</sup>/s y con una bomba de suplencia. En una segunda y última etapa se tendrán en total 7 bombas de 5.5m<sup>3</sup>/s cada una para una capacidad máxima de bombeo de 38.5m<sup>3</sup>/s. La altura de bombeo es de 46m aproximadamente, con lo cual se entrega el caudal bombeado al nivel requerido por la futura PTAR Canoas para su funcionamiento.

Indicó asimismo, que esta obra hace parte de un proyecto integral en el marco del programa de saneamiento del río Bogotá y el Acuerdo de Cooperación para la construcción de la Planta de Tratamiento de aguas residuales PTAR-Canoas (Fase I y II) y su estación elevadora.

Adujo que El DNP ha realizado seguimiento al CONPES 3320 Estrategia Ambiental para el manejo del río Bogotá a través del SISCONPES<sup>25</sup>, razones éstas por las cuales siempre ha estado atenta a cumplir con las funciones previstas por la Constitución y la Ley. Tampoco ha

---

<sup>25</sup>[http://sisconpes.dnp.gov.co/DocumentosConpesenSeguimiento/tabid/167/ctl/Card/mid/551/con\\_id/196/Default.aspx](http://sisconpes.dnp.gov.co/DocumentosConpesenSeguimiento/tabid/167/ctl/Card/mid/551/con_id/196/Default.aspx).

Expediente No. 25000-23-27-000-2001-0479-01  
Acumulados Nos. 2000-0428, 2001-0122, 2001-0343  
Actor: GUSTAVO MOYA ÁNGEL Y OTROS  
Acción Popular

amenazado los derechos colectivos que en la acción popular se reclaman como vulnerados y ha cumplido a cabalidad con las cargas impuestas en la sentencia de primera instancia que fue objeto de impugnación por la DNP y el FNR en liquidación.

Finalmente anotó que el *a-quo* incurrió en nulidad insaneable al aprobar parcialmente el pacto de cumplimiento, desconocer el espíritu del legislador y los postulados y la esencia del artículo 27 de la Ley 472 de 1998, conforme lo ha establecido el H. Consejo de Estado en su jurisprudencia como mecanismo para la solución de conflictos dentro de la acción popular, que permite acercar a las partes para que éstas puedan por sí mismas, aunque con la orientación imparcial del juez, llegar a un acuerdo que finalice el litigio, resuelva la controversia y haga tránsito a cosa juzgada; lo cual evita el desgaste del aparato judicial.

En tal sentido destacó que cuando se celebra un pacto de cumplimiento, éste deberá suscribirse sobre la totalidad de las pretensiones esgrimidas en la demanda, es decir que para que proceda su aprobación, tendrá que resolverse en él todos y cada uno de los extremos de la litis.

**VIII.6.18. EL INSTITUTO DE HIDROLOGÍA,  
METEOROLOGÍA Y ESTUDIOS AMBIENTALES - IDEAM  
(FOLIOS 13533 A 13538)**

Por medio de apoderada judicial planteó como fundamento de los alegatos de conclusión que el IDEAM no es

Expediente No. 25000-23-27-000-2001-0479-01  
Acumulados Nos. 2000-0428, 2001-0122, 2001-0343  
Actor: GUSTAVO MOYA ÁNGEL Y OTROS  
Acción Popular

responsable de contaminar el río Bogotá, por su naturaleza es un instituto que realiza investigaciones y coordina la red hidrometeorológica del río Bogotá, no una autoridad ambiental que pueda imponer sanciones y evitar que se contamine el río Bogotá por la actividad que ejerce exclusivamente una empresa en el Embalse del Muña.

Adujo que las funciones del IDEAM están previstas en los artículos 2 y 15 del Decreto 1277 de 1994.

Asimismo, hizo referencia a las actividades adelantadas por la entidad:

- Contrato No. 081-2008- Paola Andrea Bulla Portuquez para realizar las labores de especialización y georeferenciación de las estaciones hidrometeorológicas y ambientales con transmisión satelital del IDEAM.
- Contrato No. 085-2008 Diana Marcela Gómez Bonilla, con el objeto de realizar el seguimiento a la red de estaciones automáticas comprendidas dentro del marco del Convenio 005/2008 IDEAM\_CAR Valor: \$6.000.000, plazo 4 meses.
- Contrato N0. 087-2008 María Constanza Rosero Mesa, realizar actividades tendientes a optimizar la red de estaciones hidrológicas de propiedad del IDEAM y de la CAR que se encuentran en jurisdicción de la Corporación, en un plazo de cuatro meses por valor de \$19.440.000.

Expediente No. 25000-23-27-000-2001-0479-01  
Acumulados Nos. 2000-0428, 2001-0122, 2001-0343  
Actor: GUSTAVO MOYA ÁNGEL Y OTROS  
Acción Popular

- Contrato No. 143-2008 Víctor Leonardo López Jiménez para optimizar la red de estaciones meteorológicas de propiedad del IDEAM y la CAR en jurisdicción de la Corporación.

Se han igualmente suscrito los siguientes Convenios:

- Convenio Específico número 117/2003 celebrado entre el IDEAM y la CAR cuyo objeto es la instalación, operación y mantenimiento de treinta estaciones hidrometeorológicas automáticas que generen información para la IDEAM y para la CAR, de las cuales 25 fueron adquiridas por el IDEAM a través del crédito Suizo y cinco (5) adquiridas por la CAR.
- Convenio específico número 117/2003-002 celebrado por el IDEAM y la CAR, el cual tuvo por objeto aunar esfuerzos entre las dos entidades con el fin de realizar la revisión, reparación, calibración y certificación de la calibración del instrumental convencional de la red hidrometeorológica de la CAR.
- Convenio 005/2010 celebrado con la CAR para la operación y mantenimiento de la red hidrometeorológica conjunta del IDEAM y la CAR en jurisdicción de la CAR, generar, recolectar y procesar datos de 31 estaciones construidas e instaladas conjuntamente entre las dos entidades en jurisdicción de la CAR; poner en marcha los resultados de los estudios de reingeniería de la red hidrometeorológica en un proyecto piloto de red óptima conjunta IDEAM-CAR en la cuenca alta del río Ubaté; unificar procedimientos de operación y

**Expediente No. 25000-23-27-000-2001-0479-01**  
**Acumulados Nos. 2000-0428, 2001-0122, 2001-0343**  
**Actor: GUSTAVO MOYA ÁNGEL Y OTROS**  
**Acción Popular**

mantenimiento de estaciones, generación, captura y verificación de información hidrometeorológica, por valor de \$215.000.000.

- Convenio 012/2011 suscrito con la CAR para la operación y mantenimiento de la red hidrometeorológica conjunta del IDEAM y de la Car en jurisdicción de la CAR por valor de \$281.000.000 para ejecutarse entre el 5 de julio de 2011 y 4 de julio de 2012.

En desarrollo de estos contratos y convenios se han realizado las siguientes actividades en la Cuenca del río Bogotá:

- Especialización y georeferenciación de estaciones.
- Revisión de la información de estaciones automáticas.
- Propuesta de optimización de la red de estaciones hidrológicas.
- Propuesta de optimización de la red de estaciones meteorológicas.
- Instalación, operación y mantenimiento de siete estaciones climatológicas.
- Instalación, operación, y mantenimiento de tres estaciones hidrológicas.
- Captura y procesamiento de información hidrometeorológica.

Expediente No. 25000-23-27-000-2001-0479-01  
Acumulados Nos. 2000-0428, 2001-0122, 2001-0343  
Actor: GUSTAVO MOYA ÁNGEL Y OTROS  
Acción Popular

Finalmente, solicitó modificar la sentencia de primera instancia en el sentido de exonerar al IDEAM de cualquier responsabilidad.

#### **VIII.6.19. EL MUNICIPIO DE CHÍA (fls. 13547 A 13550)**

Por medio de apoderada judicial alegó en los siguientes términos:

El Municipio de Chía no hace parte de la jurisdicción del Distrito Capital y no ha adquirido compromiso alguno respecto de la planta de tratamiento de aguas residuales de Canoas, sin embargo la administración municipal ha realizado adelantos para la descontaminación del río Bogotá por el compromiso adquirido en la acción popular, folio 309 de la sentencia de 25 de agosto de 2004. Igualmente en la audiencia del 14 de noviembre de 2012 el Alcalde municipal presentó los avances y compromisos asumidos por el municipio, anexada al acta y al expediente.

#### **El informe comprende:**

- 1.- Plan Maestro de Acueducto a corto plazo que con sus ajustes se presentó a la CAR para evaluación.
- 2.- Planta de Tratamiento de agua potable a corto plazo, se solicitó la concesión de aguas superficiales a la CAR, en trámite; levantamiento topográfico desde el Embalse del Neusa hasta el Municipio de Chía, conjuntamente con la CAR. Se evaluó la posibilidad de tratamiento de las

Expediente No. 25000-23-27-000-2001-0479-01  
Acumulados Nos. 2000-0428, 2001-0122, 2001-0343  
Actor: GUSTAVO MOYA ÁNGEL Y OTROS  
Acción Popular

aguas sobrantes del Sistema de Tibitoc que dio como resultado la no viabilidad por los altos costos de operación.

3.- Obra: Chilacos, redes de alcantarillado separadas (aguas negras y aguas lluvias) con el objeto de aliviar la carga de saturación del interceptor de aguas residuales entre la calle 19 y el sector de premezclados y en el sector del camino de la Conchucua vereda de Samaría, aliviando la carga de aguas lluvias de la PTAR Chía I., valor: \$3.500.000.000.

En el mismo sentido las obras de Bojacá, Fagua, complementaria de la red de aguas residuales; Construcción PTAR El Darién, Cataluña y El Cacique, recuperación de la PTAR de Chía I.

Igualmente se creó el Banco de maquinaria para el municipio.

Allegó asimismo el cuadro de la relación de los recursos asignados para agua potable, saneamiento básico, recursos naturales y protección de fuentes hídricas para el periodo 2008-2011, con gastos en fomento forestal, construcción planta de transferencia de residuos sólidos y programa de tratamiento; conservación, mantenimiento, protección, restauración y aprovechamiento de fuentes hídricas; subsidios a los usuarios de estratos I y II de Acueducto. Construcción, ampliación y rehabilitación de sistemas de acueducto y alcantarillado del sistema de potabilización del agua; mantenimiento, conservación y rehabilitación de los recursos naturales; infraestructura para la atención y prevención de desastres y

Expediente No. 25000-23-27-000-2001-0479-01  
Acumulados Nos. 2000-0428, 2001-0122, 2001-0343  
Actor: GUSTAVO MOYA ÁNGEL Y OTROS  
Acción Popular

mantenimiento del cuerpo de bomberos y programa de atención de emergencias. En maquinaria: retroexcavadora-draga, motobombas, tracto-bombas y lancha.

Solicitó además tener en cuenta los informes allegados al Despacho que muestran los avances de obra respecto al cumplimiento del Convenio Interadministrativo 00335 de 2011 y la documentación que soporta la compra de predios por el ente territorial. Igualmente sobre la entrega al Municipio de la PTAR por la CAR y las actividades para mitigar el riesgo en la zona de la Universidad de la Sabana.

De igual manera, destacó la información contenida en el informe técnico en el cual se lee:

Se hacen las siguientes precisiones técnicas principalmente, los predios se encuentran en zona de alivio del río Bogotá en más de un 90%, además se ha causado un daño mayor con el relleno de los predios ubicados al Oriente del río Bogotá, otro factor es la construcción del muro de protección que elimina en estas áreas el alivio y amortiguamiento del Río. También estas obras ponen en riesgo al monumento Nacional como lo es el PUENTE EL COMUN.

**PUENTE EL COMUN:** Las obras como se evidencia gráficamente, ponen en riesgo total la estructura de este monumento, es cierto que la Universidad está en la necesidad de protegerse, pero igualmente debe propender para lo que se encuentra a su alrededor no se vea afectado, la intervención del muro de

**Expediente No. 25000-23-27-000-2001-0479-01**  
**Acumulados Nos. 2000-0428, 2001-0122, 2001-0343**  
**Actor: GUSTAVO MOYA ÁNGEL Y OTROS**  
**Acción Popular**

contención que se levanta a borde del cauce del río Bogotá, formando un embudo y generando así un aumento considerable en la velocidad del caudal, así como el aumento en el nivel, poniendo en riesgo la estructura del Puente. Se levantó un jarillón en el sector ubicado entre los dos puentes el vehicular y el histórico, en este sector se encuentra diseñado desde su construcción un alivio a través de un canal, pasando a través de un box en la parte occidental del mismo Puente; la función principal de este box es aliviar el caudal del Río, formando un remanso en la zona Sur occidental de este. Este jarillón genera mayor presión a la estructura del puente, formando un embudo, además que incrementa el nivel del Río, poniendo en riesgo la estructura del puente.

Los requerimientos que hace el Ministerio de Cultura, en su oficio 415-184501 de 2011, radicado de Alcaldía No 201100249999923780, manifiestan igualmente que las obras que adelanta la Universidad de La Sabana ponen en riesgo inminente la estabilidad del Monumento Nacional. Además indica la normatividad establecida en la Resolución 019 de 1992 emitida por el Consejo de Monumentos Nacionales, esta resolución delimita el área de influencia del puente El Común, en diferentes franjas de protección, también indica que en Centros Históricos, bienes de interés cultural del ámbito Nacional, en sus inmuebles colindantes o en sus áreas de influencia, deben contar con la autorización del Ministerio de Cultura, de conformidad con el numeral 2 del Artículo 11 de la ley 1185 de 2008, que modifica y adiciona la Ley General de Cultura 397 de

Expediente No. 25000-23-27-000-2001-0479-01  
Acumulados Nos. 2000-0428, 2001-0122, 2001-0343  
Actor: GUSTAVO MOYA ÁNGEL Y OTROS  
Acción Popular

1997: "(...).La autorización de intervención que debe expedir la autoridad competente no podrá sustituirse, en el caso de bienes inmuebles, por ninguna otra clase de autorización o licencia que corresponda expedir a otras autoridades públicas en materia urbanística. Quien pretenda realizar una obra, en inmuebles ubicados en el área de influencia o que sean colindantes con el bien inmueble declarado de interés cultural, deberá comunicarlo previamente a la autoridad que hubiera efectuado la respectiva declaratoria". Este oficio en su momento fue remitido con copia al Doctor OBDULIO VELASQUEZ POSADA, rector de la Universidad de La Sabana.

De lo anterior se concluye que la Universidad debe tomar las medidas necesarias para restablecer las condiciones iniciales en el área de influencia del monumento Nacional PUENTE EL COMUN, esto quiere decir que debe retirar el jarillón ubicado entre los dos puentes y permitir el alivio a través del box del mismo Puente; retirar el muro de contención sobre el río Bogotá a la distancia que establece el Ministerio de Cultura, y permitir el alivio del Río para evitar los riesgos que se han generado con las obras recientemente ejecutadas.

**OBRAS SECTOR QUEBRABA HONDA:** En este sector la Universidad de La Sabana está adelantando obras, las cuales generan un problema ambiental de grandes proporciones, teniendo en cuenta que la Universidad por protegerse no tiene en cuenta las mínimas condiciones ambientales y de riesgo que establece el

Expediente No. 25000-23-27-000-2001-0479-01  
Acumulados Nos. 2000-0428, 2001-0122, 2001-0343  
Actor: GUSTAVO MOYA ÁNGEL Y OTROS  
Acción Popular

Plan de Ordenamiento Territorial vigente, es cierto que la construcción que hace parte del Instituto Inalde hay que protegerla, se debe hacer sin poner en riesgo el funcionamiento de la zona de amortiguación del Río y de la Quebrada Honda, además que gran parte de esta zona actúa como Humedal. En las crecientes tanto del Río Bogotá así como de la quebrada, es requerimiento que los valles aluviales y zonas de amortiguación sean respetadas, evitar sus rellenos ya que se estará provocando que los niveles del Río sean mayores, lo que pondría en riesgo las estructuras de puentes, pontones y vías que se encuentran construidas a lo largo del Río, también provocara que zonas que nunca se han inundado presenten estos eventos negativos.

Por la parte media de estos predios, transcurre igualmente un brazo de la Quebrada Honda, la cual tiene su nacimiento en el Cerro Pan de Azúcar y que en épocas de invierno, recibe un gran caudal de escorrentía, esto igualmente genera y obliga la protección de este cuerpo de agua. Por tal razón en los rellenos realizados en los predios en mención han generado la reducción de su cauce, perjudicando su hidráulica, se recomienda el retiro del material depositado para recuperar su estado natural.

El muro de contención que construye la Universidad, está interviniendo el área de influencia de la Quebrada Honda, se construye a borde de cauce, no se tiene en cuenta la zona de Humedal y de amortiguamiento que tiene la zona, la norma POT,

Expediente No. 25000-23-27-000-2001-0479-01  
Acumulados Nos. 2000-0428, 2001-0122, 2001-0343  
Actor: GUSTAVO MOYA ÁNGEL Y OTROS  
Acción Popular

establece que su ronda mínimo debe ser de treinta (30) metros, igualmente se establece que los valles aluviales y de amortiguamiento no se puede adelantar ninguna intervención que perjudique el sistema, también el POT en el Plano No 1 A, "MAPA DE AMENAZAS NATURALES", los predios antes referidos se encuentran en zona de amenaza nivel IEM, Inundación y encharcamiento Medio.

**Por lo anterior se recomienda:**

- Hacer demoler el muro de contención que adelanta la Universidad, sobre el área de influencia de la Quebrada Honda y del Humedal.
- Proteger la construcción del Instituto Inalde de acuerdo a la recomendación que se hace en las imágenes de este documento, es decir por donde fueron instalados los sacos de arena en la pasada ola invernal.
- Retirar todo el material que ha sido depositado para adelantar las obras por parte de la Universidad, restaurando totalmente la zona.
- Retirar el material de relleno que en años anteriores la Universidad realizo, teniendo en cuenta las consideraciones plasmadas en este documento.
- Presentar ante las entidades competentes, los estudios y diseños de los trabajos definitivos a aprobar.

Expediente No. 25000-23-27-000-2001-0479-01  
Acumulados Nos. 2000-0428, 2001-0122, 2001-0343  
Actor: GUSTAVO MOYA ÁNGEL Y OTROS  
Acción Popular

**OBRAS RONDA RIO BOGOTA:** De acuerdo a las definiciones dadas en este documento, se requiere (que) la Universidad de La Sabana, presente los estudios y diseños definitivos a aprobar por las entidades competentes, teniendo en cuenta que los trabajos que adelanta la Universidad son de carácter provisional.

Igualmente se recomienda suspender los trabajos que adelanta la Universidad en la zona de influencia de la Quebrada Honda, y los que se adelanta en el área de influencia del Puente El Común.<sup>26</sup>

#### **VIII.6.20. LA DEFENSORÍA DEL PUEBLO (fls. 13551 a 13562)**

En complemento del memorial ya radicado, la Defensora Pública Regional Bogotá, solicitó incluir la educación ambiental en los colegios como materia desde la primaria; que la EAAB realice programas dirigidos a la ciudadanía para capacitarlos en producción limpia y cultura ambiental; que las autoridades ambientales gestionen los procesos por afectación del ambiente, se generen los límites en las áreas protegidas y zonas de ronda y que la comunidad se integre a los procesos de recuperación de las áreas de protección, se restrinja la explotación de minas en zonas urbanas. La política además deberá integrar los principios ambientales de gradación normativa y precaución, integrar a todos los actores tanto públicos como privados y particulares; debe ser

---

<sup>26</sup> G.O.T. - 0046 - 12, Chía, 18 de Enero de 2012, INFORME TECNICO VISITA OBRAS RIO BOGOTA Y BRAZO QUEBRADA HONDA, ADELANTADAS POR LA UNIVERSIDAD DE LA SABANA.

Expediente No. 25000-23-27-000-2001-0479-01  
Acumulados Nos. 2000-0428, 2001-0122, 2001-0343  
Actor: GUSTAVO MOYA ÁNGEL Y OTROS  
Acción Popular

integral, que garantice su estabilidad y continuidad, no como producto de un esfuerzo aislado sino coherente con las demás políticas ambientales, con un enfoque integral de la actividad productiva del sector, bajo la perspectiva de análisis de ciclo de vida; concertada y gradual.

De otra parte señaló la normativa que sirve de fundamento en materia de vertimientos, trámites de licencias y permisos, protección ambiental, planes de contingencia, normas urbanísticas y los ecosistemas de humedales y su impacto en las actividades humanas.

#### **VIII.6.21. SOFASA S.A. (fls. 13563 a 13566)**

A través de representante judicial, presentó alegato de conclusión haciendo la salvedad que la empresa no fue nunca vinculada formalmente al proceso, sino que como "*invitada de buena voluntad*" suscribió un pacto al que ha venido dando cumplimiento.

Reiteró los argumentos de la apelación en el sentido de afirmar que la decisión a proferir debe consultar únicamente los aspectos no contemplados o solucionados en los pactos de cumplimiento, pues de lo contrario se estaría vulnerando la cosa juzgada configurada al suscribir y cumplir el pacto.

#### **VIII.6.22. EMCOCABLES S.A. (fls. 13576 a 13577)**

Solicitó confirmar la sentencia complementaria de 16 de

Expediente No. 25000-23-27-000-2001-0479-01  
Acumulados Nos. 2000-0428, 2001-0122, 2001-0343  
Actor: GUSTAVO MOYA ÁNGEL Y OTROS  
Acción Popular

septiembre de 2004, numerales 1º y 2º, éste último en tanto aclaró que EMCOCABLES no es solidariamente responsable, pues cuenta con planta propia de aguas residuales y piscina de oxidación aprobada por la CAR, para las aguas domésticas.

#### **VIII.6.23. GIRARDOTEMOS (fls. 13578 a 13594)**

Solicitó en sus alegatos se subsanen los yerros respecto de la responsabilidad de EMGESA.

Estimó que hay un manejo equivocado del problema por parte de dicha empresa, pues existe un riesgo consciente del peligro al no tener en cuenta las dimensiones de las consecuencias sobre la salud de los habitantes del Municipio de Sibaté, por lo cual se hace necesario fijar la dimensión del "riesgo aceptable" que por ley tienen los "sibateños" y el resto de los habitantes de la rivera del Río Bogotá.

Consideró importante destacar que los permisos de emisión están relacionados con actividades restringidas por razones de orden público, por lo tanto no crean derechos adquiridos en cabeza de los respectivos titulares, quienes en su criterio son los responsables del desastre.

En estos términos, precisó que conspiran contra la descontaminación del río Bogotá y el uso genérico de sus aguas, las siguientes conductas: las dilaciones injustificadas; el desconocimiento de las leyes preexistentes sobre cuestiones ambientales; la

Expediente No. 25000-23-27-000-2001-0479-01  
Acumulados Nos. 2000-0428, 2001-0122, 2001-0343  
Actor: GUSTAVO MOYA ÁNGEL Y OTROS  
Acción Popular

inviolabilidad del derecho a la vida y el derecho que tienen las personas residentes en el Municipio de Sibaté de contar con un trabajo en condiciones dignas.

Advirtió que resulta bastante paradójico que una de las tantas personas responsables del desastre ecológico de la Cuenca del río Bogotá y causante de las afectaciones a la salud de los residentes en Sibaté proceda de forma irreflexiva a obstaculizar la más concluyente de las alternativas de solución a favor de la descontaminación del río Bogotá y su uso genérico en la cuenca baja, que es la macroplanta de tratamiento de aguas residuales localizada al final de la Sabana de Bogotá Charquito-Carboneras y la irreflexión acogida por EMGESA defendiendo la generación de energía a través de la cadena Pagua.

Posteriormente, en memorial obrante a folios 13780 a 13783, allegó prueba complementaria y sustento de la alegación, con el objeto de que sea tomada en cuenta con miras a demostrar gráficamente la contaminación ocasionada por EMGESA al Embalse del Muña y sus graves consecuencias por el vertimiento de las aguas contaminadas allí.

#### **VIII.6.24. EL MINISTERIO DE COMERCIO, INDUSTRIA Y TURISMO (fls. 13595 a 13600)**

Solicitó en sus alegatos revocar la sentencia respecto de las órdenes impartidas a dicha entidad, toda vez que no suscribió Pacto de Cumplimiento alguno, ni participó en las mesas de trabajo.

Expediente No. 25000-23-27-000-2001-0479-01  
Acumulados Nos. 2000-0428, 2001-0122, 2001-0343  
Actor: GUSTAVO MOYA ÁNGEL Y OTROS  
Acción Popular

**VIII.6.25. LA SOCIEDAD STANTON Y CÍA S.A. (fls. 13601 a 13603)**

Al presentar sus alegatos de conclusión, solicitó ratificar el Pacto de Cumplimiento presentado por la sociedad en la primera instancia y revocar el numeral 1º de la sentencia complementaria de 16 de septiembre de 2004, que dispuso la condena en costas.

**VIII.6.26. LA COMISIÓN DE REGULACIÓN DE AGUA POTABLE, CRA (fls. 13604 a 13606)**

Solicitó mantener la decisión de absolver a la CRA y agregó que la recomendación hecha en el CONPES 3320 a la CAR, relacionada con evaluar la pertinencia de los planes de saneamiento y manejo de vertimientos municipales ejecutados a través de empresas de servicios públicos como parte de los planes de gestión y resultados, en su criterio no es posible de ejecutar porque de conformidad con lo establecido en la Ley 142 de 1994 y los Decretos 2882, 2883 y 2884 de 2007, carece de competencia.

**VIII.6.27.- LA SOCIEDAD PAPELES Y CORRUGADOS ANDINA S.A., (fls. 13607 a 13608)**

Al presentar las alegaciones finales manifestó que las apelaciones planteadas, deben ser rechazadas puesto que los pactos de cumplimiento fueron presentados de manera voluntaria y aprobados en la etapa procesal correspondiente, con el lleno de los requisitos y

Expediente No. 25000-23-27-000-2001-0479-01  
Acumulados Nos. 2000-0428, 2001-0122, 2001-0343  
Actor: GUSTAVO MOYA ÁNGEL Y OTROS  
Acción Popular

trámites legales, razón por la cual debe ratificarse la existencia y valor jurídico del pacto de cumplimiento propuesto por dicha sociedad.

**VIII.6.28. LA PERSONERÍA DE BOGOTÁ D.C. (fls. 13619 a 13628)**

Por medio de apoderado presentó alegatos de conclusión en los siguientes términos:

Observó con preocupación que los debates surtidos en las últimas audiencias públicas respecto de las soluciones debatidas y ordenadas en fallo de primera instancia para la limpieza y recuperación de las aguas y el cauce del río Bogotá y la recuperación de la laguna del Muña, han girado en torno a si la construcción de la segunda planta de tratamiento de aguas residuales -PTAR- se debe construir en Canoas o en el Charquito, situación realmente irrelevante frente a la magnitud de la problemática general por la contaminación del Río Bogotá, sus afluentes, las riberas y su impacto negativo en el agro dentro de la jurisdicción de los municipios de la cuenca media y baja del Río.

De otra parte, destacó que según los documentos contentivos del estado de las aguas del Río, las visitas practicadas y los informes que ha publicado la prensa del distrito capital y la Nación, el estado de recuperación, eliminación de impurezas y grado de oxígeno disuelto continúa siendo precario, por no decir nulo, lo que coloca a las entidades encargadas y obligadas por el fallo de primera instancia en objeto de cuestionamiento

**Expediente No. 25000-23-27-000-2001-0479-01**  
**Acumulados Nos. 2000-0428, 2001-0122, 2001-0343**  
**Actor: GUSTAVO MOYA ÁNGEL Y OTROS**  
**Acción Popular**

frente a los entes de control como consecuencia de las inversiones efectuadas o dejadas de realizar dentro de las oportunidades y urgencia que la gravedad de la situación implica.

Al ser definitiva la solución, solicitó se consideren en ella dos aspectos: - Que los compromisos establecidos a las entidades del orden distrital de Bogotá se concreten en obras específicas, considerando que los elementos aportados al proceso son amplios, suficientes y técnicamente acreditados para tal fin; -que los compromisos financieros para la realización de las mismas se determinen en el fallo así como la fuente de financiación, términos y fechas para su ejecutoria; igualmente ejercer los controles y exigir a las empresas privadas que contribuyen con los vertimientos a la contaminación del río Bogotá, sus afluentes, sus nacederos, y los interceptores existentes y que posteriormente se construyan. -que se disponga la conformación de un comité que se encargue de coordinar y verificar el desarrollo de las actividades tendientes a la recuperación definitiva del cauce y aguas del distrito capital y los municipios que la integran.-que la decisión que se adopte garantice la pronta protección a los derechos colectivos a la salud y al disfrute de un ambiente sano, los cuales siguen amenazados o vulnerados mientras no se ponga fin a este proceso.

Expediente No. 25000-23-27-000-2001-0479-01  
Acumulados Nos. 2000-0428, 2001-0122, 2001-0343  
Actor: GUSTAVO MOYA ÁNGEL Y OTROS  
Acción Popular

**VIII.6.29. EL MUNICIPIO DE TOCANCIPÁ (fls. 13629 a 13649)**

Afirmó no se encuentran probados los supuestos de la responsabilidad del municipio, puesto que no sólo no existe vulneración alguna a derechos colectivos, sino que además se han tomado en su totalidad las acciones requeridas para la conservación, manejo y recuperación del río Bogotá.

Destacó la realización de las siguientes actividades:

- Seguimiento, monitoreo y control de las aguas servidas producidas por las industrias del municipio.
- Manejo de las aguas residuales de la vivienda y el comercio.
- Mejoramiento de tanques de distribución del agua en sectores rurales y urbanos.
- Construcción de alcantarillado de los sectores Buenos Aires, construcción de Alcantarillado Vereda Canavita, rectificación del sistema de Vallados aledaños al río Bogotá, canalización de vallados, construcción, terminación y puesta en marcha de plantas de tratamiento, construcción de alcantarillado sanitario.
- Campañas de educación y sensibilización para los residentes, comerciales e industriales del sector, con miras a lograr el adecuado manejo de residuos y evitar la contaminación del Río, que les compete

Expediente No. 25000-23-27-000-2001-0479-01  
Acumulados Nos. 2000-0428, 2001-0122, 2001-0343  
Actor: GUSTAVO MOYA ÁNGEL Y OTROS  
Acción Popular

igualmente.

Finalmente refirió que el municipio ha gestionado los siguientes programas: recuperación del agua, recuperación del aire, recuperación del suelo y Desarrollo y Protección Ambiental.

#### **IX.6.30. LA EMPRESA DE ENERGÍA DE BOGOTÁ S.A. E.S.P.**

En adelante, EEB (folios 13647 a 13662), por medio de apoderado judicial alegó de conclusión en los siguientes términos:

Reiteró que la sentencia debe ser revocada en lo que atañe a sus intereses, así como mantener en firme el pacto de cumplimiento presentado y aprobado por el Tribunal de instancia.

Manifestó que la condena a la EEB es incompatible con la aprobación del pacto de cumplimiento por ella presentado, el cual fue modificado con posterioridad al fallo de primera instancia y aprobado por el Tribunal Contencioso Administrativo.

Expuso que la EEB en la sentencia numerales 1 y 4 literal f y 7 de la parte resolutive fue declarado solidariamente responsable por omisión de la catástrofe ecológica del río Bogotá y de la contaminación de los ríos y quebradas afluentes del mismo y, por otro lado, le fue aprobado el pacto de cumplimiento, temas que consideró deben ser

Expediente No. 25000-23-27-000-2001-0479-01  
Acumulados Nos. 2000-0428, 2001-0122, 2001-0343  
Actor: GUSTAVO MOYA ÁNGEL Y OTROS  
Acción Popular

sustraídos de la decisión, en tanto es precisamente ese el objeto del pacto de cumplimiento.

Adicionalmente sostuvo que en el presente caso, a pesar de haberse aprobado el pacto propuesto por la empresa, ésta fue condenada a cumplir otras prestaciones.

En su criterio, el juez, al haber aprobado el pacto propuesto, carece de jurisdicción para proferir fallo en contra o a favor a ese mismo litisconsorte.

Agregó que el pacto fue modificado por el Tribunal en los Comités de Verificación convocados para los días 20 de septiembre de 2005, 5 de diciembre del mismo año y 3 de febrero de 2006, por lo cual solicitó tener en cuenta dichas actuaciones al proferir la decisión de segunda instancia.

Adujo que no puede agravarse la situación de la empresa en segunda instancia, puesto que ha cumplido a cabalidad con el pacto de cumplimiento.

En dichos términos, solicitó revocar la sentencia apelada en el sentido de excluir la condena solidaria impuesta en el numeral primero de la parte resolutive a la EEB y que la única declaración que quede vigente sea la del numeral 4 literal f) de la parte resolutive en cuanto aprobó el Pacto de Cumplimiento y, en el evento de no se acceder a esta solicitud, que el Consejo de Estado se pronuncié sobre la petición de declarar improcedente el llamamiento en garantía de la Aseguradora Colseguros S.A. y la denuncia del pleito a la CAR.

Expediente No. 25000-23-27-000-2001-0479-01  
Acumulados Nos. 2000-0428, 2001-0122, 2001-0343  
Actor: GUSTAVO MOYA ÁNGEL Y OTROS  
Acción Popular

En relación con el incentivo, solicitó revocar su reconocimiento por cuanto la Ley 1425 de 2010 lo derogó, de manera que quien había impetrado una acción popular sin que se hubiere fallado, sólo contaba con una mera expectativa. En caso de no aceptarse esta petición solicitó exonerar de dicha obligación a la empresa, puesto que solucionó sus controversias con la suscripción del pacto de cumplimiento, que fue acogido y constituye cosa juzgada. No obstante adujo que, en todo caso el monto del incentivo en ningún caso podrá exceder de ciento cincuenta salarios mínimos legales mensuales, y así sean cuatro los actores populares deben ser considerados como una sola parte demandante.

En tal sentido, solicitó individualizar el porcentaje o suma específica a cargo de cada demandado.

#### **VIII.6.31. EL MINISTERIO DE MINAS Y ENERGÍA (fls. 13672 a 13704)**

Por medio de apoderada judicial alegó de conclusión reiterando lo señalado en los escritos de sustentación de la apelación para destacar que el Ministerio de Minas no es autoridad ambiental sino ente rector de la política minero-energética.

Destacó que para la expedición del actual código de minas, el legislador en aras de buscar el desarrollo sostenible de los recursos no renovables y renovables, estableció una perfecta interacción de los asuntos ambientales y mineros, reconociendo que la actividad

Expediente No. 25000-23-27-000-2001-0479-01  
Acumulados Nos. 2000-0428, 2001-0122, 2001-0343  
Actor: GUSTAVO MOYA ÁNGEL Y OTROS  
Acción Popular

minera cumple con un papel preponderante en la economía, tradición y subsistencia de buena parte de la población colombiana.

Advirtió igualmente que no se encuentra probado en el proceso que el Ministerio de Minas y Energía haya violado alguno de los derechos colectivos invocados en la demanda, sin perjuicio de aceptar que frente a un mismo tema varias entidades puedan tener funciones y competencias, dentro de las cuales de ninguna manera se puede considerar que el Ministerio tenga la de "establecer planes y programas ambientales que propendan por la mitigación de posibles impactos ambientales en el desarrollo de una actividad productiva"(fl. 71 de la sentencia).

En estos términos se apartó de lo expresado por el Tribunal, por considerar que el Ministerio ha cumplido con sus funciones de acuerdo con lo ordenado por la Constitución y la ley.

En cuanto a los ordinales b y d del numeral 3º de la parte resolutive de la sentencia, precisó que si bien dentro de las funciones establecidas en los artículos 5, 31 y 61 de la Ley 99 de 1993, corresponde al MAVDT "delimitar las zonas excluidas de la minería", erradamente consideró el Tribunal que dicha normatividad no ha sido expedida, cuando en relación con dicha medida han existido la Resoluciones 222 de 1994 derogada por la Resolución 813 de 2004 y hoy modificada por la Resolución 1197 de 2004, expedidas por el Ministerio de Ambiente, Vivienda y Desarrollo Territorial, en las cuales se

Expediente No. 25000-23-27-000-2001-0479-01  
Acumulados Nos. 2000-0428, 2001-0122, 2001-0343  
Actor: GUSTAVO MOYA ÁNGEL Y OTROS  
Acción Popular

"redefinen y establecen las zonas compatibles con la minería de materiales de construcción y se definen y establecen las zonas con la minería de arcillas en la Sabana de Bogotá, se sustituyen las Resoluciones 0222 de 1994, 249 de 1994, 1277 de 1996 y 0803 de 1999 y se adoptan otras determinaciones", resolución esta última que fue objeto de nulidad parcial por el Consejo de Estado.

En la actualidad y desde el mes de diciembre de 2011, mediante oficio radicado el 16 de diciembre en el Ministerio de Ambiente y Desarrollo Sostenible, el concepto previo no vinculante de que trata el artículo 3 de la Ley 1382 de 2010 y que en ningún momento pretende acabar y cerrar las explotaciones mineras concedidas mediante actos o contratos, sino que propende porque las actividades mineras se realicen cumpliendo los planes de manejo ambiental y un desarrollo sostenible adecuado.

En lo relativo a la competencia del Ministerio de Minas y Energía, anotó que los títulos mineros señalados en la sentencia se otorgaron mediante el cumplimiento de las disposiciones legales vigentes para la época, y que la autoridad minera ha llevado a cabo la fiscalización y seguimiento de las actividades que han venido desarrollándose, razón por la cual no puede recaer responsabilidad alguna sobre la entidad.

En estos términos, de conformidad con los certificados de registro minero expedidos por INGEOMINAS, hoy servicio geológico colombiano (delegataria de la función de autoridad minera, fiscalización y seguimiento), es claro

Expediente No. 25000-23-27-000-2001-0479-01  
Acumulados Nos. 2000-0428, 2001-0122, 2001-0343  
Actor: GUSTAVO MOYA ÁNGEL Y OTROS  
Acción Popular

que la autoridad no se ha limitado a expedir licencias o títulos mineros, sino también a exigir la constitución de garantías e imponer multas para hacer exigibles las obligaciones mineras.

Agregó que en lo relativo a la parte ambiental, es la autoridad correspondiente (DAMA; CAR O MAVDT) la llamada a pronunciarse cuando las explotaciones causan impactos ambientales notorios al área afectada por las actividades que hayan introducido modificaciones considerables al paisaje y efectos graves sobre los recursos naturales, así como decidir si hay lugar a la suspensión o cancelación de las autorizaciones o licencias ambientales, evento en el cual ante el pronunciamiento de la autoridad ambiental, puede el Ministerio de Minas y Energía cancelar o declarar la caducidad de los títulos mineros. En todo caso, si se presentan causales de revocación previstas en el código minero ellas deberán producirse previo agotamiento del procedimiento establecido en la ley.

De lo contrario, consideró que frente a un derecho adquirido, se desconocen la libre empresa e iniciativa privada que garantizan la Constitución Política, además de la autonomía empresarial, lo que llevaría el negocio minero a la quiebra, generaría desempleo y un alto riesgo de demandas contra el Estado, al afectar derechos legítimamente adquiridos por los particulares.

En estos términos afirmó no compartir las consideraciones de la sentencia apelada, específicamente el contenido de los numerales 6.5.1.1 y 6.5.1.4, así como tampoco la

Expediente No. 25000-23-27-000-2001-0479-01  
Acumulados Nos. 2000-0428, 2001-0122, 2001-0343  
Actor: GUSTAVO MOYA ÁNGEL Y OTROS  
Acción Popular

parte condenatoria.

Sobre lo expresado en la sentencia en los numerales 6,5,1,5 y 6,5,1,6, precisó que es necesario hacer claridad que para el momento en que la autoridad minera expidió los mencionados títulos en el Municipio de La Calera, dicha zona no estaba excluida para desarrollar ese tipo de actividad, sumado a ello que sus titulares han cumplido lo exigido por la CAR en cuanto hace a la recuperación y restauración, mientras que la explotación se encuentra suspendida hasta tanto se demuestre la restauración en las actividades autorizadas con anterioridad a la expedición de las Resoluciones No. 222 de 1994, 813 y 1197 de 2004 vigentes para la época.

Agregó que ya el Consejo de Estado<sup>27</sup> se ha pronunciado en el sentido de afirmar que "la definición de las zonas compatibles con la minería en la Sabana de Bogotá, es una atribución legal propia y exclusiva del Ministerio del Medio Ambiente (art. 61 de la Ley 99 de 1993)".

Adujo que la orden impartida por el Tribunal de instancia en el literal c) respecto de otorgar un término máximo de seis meses al MAVDT, para que con la intervención del Ministerio de Minas, proceda a revocar y suspender los títulos mineros, permisos, concesiones y licencias de exploración minera en las zonas de exclusión, no es competencia del Ministerio de Ambiente sino que recae de manera exclusiva en la autoridad minera (hoy Agencia

---

<sup>27</sup> Consejo de Estado, Sala de lo Contencioso Administrativo, Sección Quinta, sentencia 31 de julio de 2003, acción popular radicado No. 25000232400020020005901.

Expediente No. 25000-23-27-000-2001-0479-01  
Acumulados Nos. 2000-0428, 2001-0122, 2001-0343  
Actor: GUSTAVO MOYA ÁNGEL Y OTROS  
Acción Popular

Nacional de Minería ANM-), al igual que la cancelación o caducidad de los títulos mineros.

Adicionalmente afirmó que tampoco puede el Ministerio puede revocar los títulos mineros sin que previamente se haya establecido y probado la causal aplicable para ello; no se puede declarar la caducidad de los títulos sin tener en cuenta las causales taxativamente establecidas en el Estatuto Minero pues muchos de esos títulos cuentan con planes de manejo ambiental y de recuperación morfológica.

En cuanto a la parte final del ordinal e) del numeral 3 de la parte resolutive, en la que se ordena al Ministerio de Minas y Energía en el ámbito de su competencia, hacer posible la reubicación de las familias que se encuentran lavando arenas en el río Tunjuelo con necesidades básicas insatisfechas, en los demás complejos mineros, estableció que dicha orden escapa de la órbita de competencia del Ministerio, agregando que del fallo puede concluirse que esas familias son explotadoras ilegales de arena, frente a las cuales la autoridad minera debe proceder al cierre inmediato (art. 306 del Código de Minas).

En cuanto a la Resolución 76 de 1977, que declaró la reserva forestal Nacional Cuenca Alta del río Bogotá, afirmó que al encontrarse inscrita en la Oficina de Registro de Instrumentos Públicos, no produce efectos frente a terceros y en consecuencia los títulos mineros otorgados se encuentran vigentes.

En relación con los literales ñ y q del numeral tercero

Expediente No. 25000-23-27-000-2001-0479-01  
Acumulados Nos. 2000-0428, 2001-0122, 2001-0343  
Actor: GUSTAVO MOYA ÁNGEL Y OTROS  
Acción Popular

de la parte resolutive de la sentencia, manifestó que el Ministerio carece de competencia.

**VIII.6.32. MIGUEL ANGEL CHAVEZ GARCÍA (fl. 13705 a 13716)**

En calidad de actor, señaló que está claramente demostrado que por acción y/u omisión las entidades accionadas son responsables directa e indirectamente de la contaminación del río Bogotá, sus afluentes y la represa del Muña por el "trasbasamiento" de las aguas del Río al embalse.

Agregó que el recurso del agua, debe ser protegido en esta sede judicial ante la negligente labor del Estado-departamento, ministerios, CAR, Distrito Capital y municipios, quienes a lo largo del tiempo no han tomado las acciones conjuntas y coherentes para evitar el deterioro paulatino de dicho recurso hídrico generando en consecuencia mayores inversiones para la descontaminación y recuperación de sus rondas que es el objeto de la acción popular.

Así las cosas, precisó que el fallo debe propender por la protección de los derechos colectivos y consagrar las medidas correctivas a corto, mediano y largo plazo, por lo cual se requiere de la concurrencia de los accionados para asumir los costos que demanden las inversiones por los vertimientos de aguas residuales domésticas e industriales.

Además, la decisión deberá crear una verdadera conciencia

Expediente No. 25000-23-27-000-2001-0479-01  
Acumulados Nos. 2000-0428, 2001-0122, 2001-0343  
Actor: GUSTAVO MOYA ÁNGEL Y OTROS  
Acción Popular

ambiental de protección del recurso hídrico principal corredor del Departamento de Cundinamarca.

Finalmente, trajo a colación el estudio hecho por la Fundación Al Verde Vivo sobre los niveles permitidos y encontrados en el estudio de metales pesados en agua.

#### **VIII.6.33. EL COMITÉ DE VERIFICACIÓN**

Para el seguimiento de las obligaciones contraídas por los demandados en los diferentes pactos de cumplimiento (fls. 13769 a 13772), allegó informe sobre la gestión de verificación.

#### **VIII.6.34. LA FUNDACIÓN AMIGOS DEL PLANETA (fl. 13773 a 13779)**

Por medio de apoderada judicial alegó de conclusión con el objeto de que se modifiquen las dos sentencias recurridas, se concedan las pretensiones de los actores populares y se proceda a condenar a las entidades públicas y a las empresas privadas demandadas o vinculadas al proceso, por los daños ambientales causados al río Bogotá y a la laguna del Muña, así como a los ríos, humedales y quebradas contiguos a los dos ecosistemas en comento, para que mitiguen, corrijan y compensen los daños en los términos de las normas jurídicas de protección del medio ambiente que rigen en el país.

Señaló que de conformidad con el caudal probatorio está

Expediente No. 25000-23-27-000-2001-0479-01  
Acumulados Nos. 2000-0428, 2001-0122, 2001-0343  
Actor: GUSTAVO MOYA ÁNGEL Y OTROS  
Acción Popular

demostrado que la conducta omisiva de entidades del Estado y la acción de las empresas privadas ha causado daños ambientales al río Bogotá, sus cuencas aferentes y la laguna del Muña, por lo que deberá condenárseles a resarcir y compensar los daños.

#### **VIII.6.35. MARÍA JOSÉ PAÉZ DÍAZ**

A pesar de no ser admitida como coadyuvante en el proceso, presentó escrito de alegatos de conclusión (fls. 13717 a 13756) adjuntando la visita técnica al río Bogotá realizada el 15 de febrero de 2013 por un grupo interdisciplinario de profesionales con el objeto de constatar el estado actual de las aguas del Río, las acciones de saneamiento adelantadas por la CAR en la PTAR Salitre y la EAAB a partir del trabajo realizado por el Tribunal de instancia.

#### **VIII.6.36. EMGESA S.A. E.S.P. (fls. 13821 a 13843)**

Por medio de apoderado judicial allegó los alegatos de conclusión solicitando reiterar que la empresa no contamina las aguas del río Bogotá, sólo le incumbe la pretensión relativa a la contaminación del Embalse del Muña.

Señaló que fue obligada a realizar obras tendientes a la descontaminación del Embalse del Muña, obras que realizó con generosidad hasta el punto que en la actualidad la contaminación por olores y deterioro del mismo ya han

Expediente No. 25000-23-27-000-2001-0479-01  
Acumulados Nos. 2000-0428, 2001-0122, 2001-0343  
Actor: GUSTAVO MOYA ÁNGEL Y OTROS  
Acción Popular

desaparecido y si los olores reaparecen es por la continua contaminación del río Bogotá.

En estos términos indicó que no puede ser condenada en la segunda instancia ni imponérsele obligación alguna relativa a la participación en la construcción de la estación elevadora, pues la empresa nada tiene que ver con la contaminación del río Bogotá.

Adujo que sus derechos adquiridos no pueden verse afectados por el cumplimiento de la condena a otros demandados, como la EAAB, entre ellas la hipotética construcción de la estación elevadora en sitio diferente al pactado por las partes; EMGESA sólo podrá asumir las obligaciones actuales, incluidos los costos de la conducción de las aguas al Embalse del Muña, de lo contrario se estaría causando un daño que la empresa no está obligada a soportar, porque ni es demandada por la contaminación del Río ni responsable de tales daños.

Agregó que como se ha demostrado en el proceso, la contaminación del río Bogotá se ha generado no por conductas atribuibles a EMGESA, sino por la omisión en el tratamiento de las aguas vertidas al Río. En efecto, el Distrito aporta una carga orgánica de 185.930 toneladas/año, generando el 85% de la contaminación de la cuenca.

Destacó la realización de numerosas acciones como la desecación de las colas del embalse, la construcción de diques, la remoción total del buchón del embalse, el control del nivel de zancudos y el seguimiento y

Expediente No. 25000-23-27-000-2001-0479-01  
Acumulados Nos. 2000-0428, 2001-0122, 2001-0343  
Actor: GUSTAVO MOYA ÁNGEL Y OTROS  
Acción Popular

monitoreo de la calidad del agua.

En tal contexto, afirmó que EMGESA ha cumplido totalmente las obligaciones del pacto y no hay razón para que ahora se le impongan cargas por la contaminación del Río cuando ella no es agente contaminante.

Refirió que la empresa ha defendido una solución integral que contempla una estación elevadora y una planta de tratamiento en el sector de Canoas, la cual permite armonizar el saneamiento del Río con la generación de energía y la prestación eficiente del servicio que no sólo resuelve de manera definitiva la problemática ambiental. EMGESA aceptó participar de manera voluntaria en esta solución integral, ofreciendo una suma importante de dinero para lograr el cierre financiero que permitiría adoptar dicha alternativa bajo dos condiciones: a) que se amplíe a EMGESA la concesión para el uso del agua hasta el año 2038 y b) que efectivamente se construya la estación elevadora.

Reiteró que no está llamada a responder por la contaminación del río Bogotá, pues no existe nexo causal entre la contaminación y el daño imputable a la empresa. Si la Sala estima que aplica la causalidad concurrente, cada uno debe responder según su participación causal en el daño, en cuyo caso se deberá tener en cuenta ese factor para determinar con cuanto responde cada uno de los demandados. Pero aún en esta hipótesis EMGESA no estaría llamada a responder porque incluso en la causalidad concurrente el hecho tiene que ser imputable al demandado para que éste sea responsable. Además no

Expediente No. 25000-23-27-000-2001-0479-01  
Acumulados Nos. 2000-0428, 2001-0122, 2001-0343  
Actor: GUSTAVO MOYA ÁNGEL Y OTROS  
Acción Popular

puede confundirse la contaminación del Río con la contaminación del Embalse, y en el evento que EMGESA dejara de bombear agua al Embalse, quedaría vigente el núcleo esencial de la demanda cual es la contaminación del río Bogotá. Si por el contrario el Río se descontamina el embalse también, así que mientras no se descontamine el Río no podrá descontaminarse el Embalse.

Consideró que lo justo, es que sea la Empresa de Acueducto y Alcantarillado de Bogotá - EAAB, la que asuma la actividad, pues según consta en el proceso, más del 80% de la contaminación del Río es imputable a las aguas negras vertidas por ella. Asimismo deben las demás empresas demandadas, ser condenadas a realizar el tratamiento de las aguas antes de ser vertidas al Río.

Por lo demás, sostuvo que cualquier alternativa diferente a la propuesta técnica concertada en el sector de Canoas, resultaría mucho más gravosa para todos los habitantes y para los recursos naturales, dada la extensión en el tiempo de las otras soluciones que en la actualidad carecen de estudios técnicos, ambientales y económicos.

Refirió además que dicha solución hace compatible el saneamiento del Río con la generación de energía, dando seguridad y confiabilidad al sistema eléctrico; permite hacer uso de los recursos apropiados por la Nación y otras entidades, y brinda una solución definitiva a la problemática ambiental del río Bogotá y el Embalse del Muña.

Por lo expuesto, solicitó se adopte una solución integral

Expediente No. 25000-23-27-000-2001-0479-01  
Acumulados Nos. 2000-0428, 2001-0122, 2001-0343  
Actor: GUSTAVO MOYA ÁNGEL Y OTROS  
Acción Popular

a la contaminación del río Bogotá que permita continuar con la prestación eficiente del servicio público de energía y, en el remoto evento que la sentencia sea revocada por el Consejo de Estado, se desatienda la oferta o propuesta que con ánimo conciliatorio haya hecho EMGESA, para en su lugar fallar de acuerdo con la responsabilidad y participación causal que les quepa a todos y cada uno de los demandados.

Por último expuso que cuando el Estado es declarado responsable, la condena tiene que proferirse sin consideración a su presupuesto y planeación, en tanto que el monto de la condena y la responsabilidad no son negociables.

#### **VIII.6.37. HUMBERTO GONZÁLEZ VILLANUEVA**

En calidad de actor a folios 13872 a 13878, presenta memorial de alegatos con el objeto de ratificar los hechos y pretensiones de la demanda promovida con el fin de que las entidades accionadas cumplan con la protección constitucional del medio ambiente, mediante la promoción de programas, políticas públicas y ejecución de obras tendientes a la recuperación efectiva como lo son las fuentes hídricas, con fundamento en los fallos de la Corte Constitucional que en sentencia hito T-740 de 2011 ha conceptualizado la protección del agua, desde donde se evidencia que el Estado debe promover una protección integral de las fuentes hídricas y que constituye un derecho fundamental donde se alerta que el descuido administrativo puede llevar a la trasgresión de los

Expediente No. 25000-23-27-000-2001-0479-01  
Acumulados Nos. 2000-0428, 2001-0122, 2001-0343  
Actor: GUSTAVO MOYA ÁNGEL Y OTROS  
Acción Popular

derechos de la Nación, que puede generar graves problemas hacia el futuro ambientales y de orden público.

#### **VIII.6.38. JORGE ENRIQUE CUERVO RAMÍREZ**

En calidad de accionante describió el traslado en escrito radicado a folios 13904 a 13928 en los siguientes términos:

- Se confirme la sentencia de primera instancia en cuanto atañe a la declaratoria de responsabilidad solidaria por acción y omisión a las entidades públicas allí citadas; así como del amparo a los derechos colectivos, se restituyan las cosas a su estado anterior para lograr la descontaminación del río Bogotá y sus afluentes, contenidos en los literales a,b,d,e,g,h,j,n,ñ,p,r,s,t,u y x; se revoque la sentencia por cuanto no existió un único pacto de cumplimiento, sino aprobaciones parciales y modificaciones a los mismos por parte del Tribunal de instancia.
- Se modifique la sentencia rechazando todo lo relacionado con la construcción de interceptores a lo largo de los ríos interiores de Bogotá, la construcción de la PTAR Canoas y la estación elevadora de Canoas.

Expediente No. 25000-23-27-000-2001-0479-01  
Acumulados Nos. 2000-0428, 2001-0122, 2001-0343  
Actor: GUSTAVO MOYA ÁNGEL Y OTROS  
Acción Popular

**VIII.6.39. LA EMPRESA DE ACUEDUCTO,  
ALCANTARILLADO Y ASEO DE MADRID EAAAM E.S.P.  
(fls. 13929 a 13931)**

Por medio de apoderada alegó de conclusión en memorial obrante a folios 13929 a 13931, señalando que el Municipio de Madrid no es ribereño del río Bogotá el río Subachoque representa un 21% del Municipio de Madrid y desemboca en el río Balsillas que a su vez desemboca en el río Bogotá.

Agregó que el paso del río Subachoque Subachoque por el municipio ya presenta un alto grado de contaminación, razón por la que ha adoptado medidas para contrarrestarla, las cuales resultan infructuosas si no se aúnan esfuerzos por los municipios de dicho paso.

Afirmó que el municipio ha realizado la construcción el sistema hídrico y sanitario Plazoleta Serrezuela, el alcantarillado de las asociaciones de viviendas de interés social San Carlos y la Libertad, y con aportes del Ministerio de Desarrollo Económico y la Gobernación de Cundinamarca, la construcción del colector de aguas negras y colector principal a la Planta de Tratamiento Madrid I, la construcción del colector de aguas lluvias de la carrera 2 Barrio San Francisco, así como la adquisición del inmueble para la reubicación de las familias que habitan en la ronda del Río, entre otras.

Expediente No. 25000-23-27-000-2001-0479-01  
Acumulados Nos. 2000-0428, 2001-0122, 2001-0343  
Actor: GUSTAVO MOYA ÁNGEL Y OTROS  
Acción Popular

**VIII.6.40. LA SOCIEDAD MATCO, MATERIALES DE COLOMBIA S.A.**

Reiteró se tengan en cuenta las solicitudes radicadas por la sociedad en memoriales de 24 de octubre de 2006, 11 de mayo de 2007, 6 de mayo de 2009, 19 de agosto de 2009, y 14 de diciembre de 2013, con el objeto de que se declare que la sociedad no es parte en el proceso en cuanto su vinculación se debió a un error de transcripción, la sociedad llamada en garantía fue Malterías de Colombia S.A. MALCO S.A. además que la sociedad no efectúa vertimientos al río Bogotá.

Expediente No. 25000-23-27-000-2001-0479-01  
Acumulados Nos. 2000-0428, 2001-0122, 2001-0343  
Actor: GUSTAVO MOYA ÁNGEL Y OTROS  
Acción Popular

## IX.

### CONCEPTO DEL MINISTERIO PÚBLICO

El Ministerio Público en su alegato de conclusión, (fls. 13954 a 14075), previa consideración de los documentos a tener en cuenta para adoptar la decisión de fondo, relacionados con la descontaminación del río Bogotá, estimó que el Tribunal Administrativo de Cundinamarca **aprobó pactos de cumplimiento parciales**, situación proscrita por la jurisprudencia de esta Corporación.

Agregó que, analizada la situación de hecho, en contraste con los requisitos que, conforme a la jurisprudencia, debe reunir el pacto de cumplimiento, se evidencia la inobservancia de ciertas exigencias relacionadas con: <<v) *Las correcciones realizadas por el juez al pacto deberán contar con el consentimiento de las partes.*>> y <<vi) *El acuerdo logrado debe ser aprobado por el juez a través de una sentencia, dado que es mediante una providencia de esta clase, que se imparte aprobación al pacto de cumplimiento.*<sup>28</sup>[... ] *En ese orden de ideas, la finalidad y aprobación del pacto de cumplimiento está condicionada a que en su contenido se establezca la protección de los derechos e intereses colectivos, que es el fin, móvil o motivo de la acción popular.*>>; porque evidentemente el Tribunal estableció adiciones a los pactos de cumplimiento en la sentencia que, por obvias razones, no tuvieron el consentimiento de las partes, e igualmente, porque, si los pactos de cumplimiento hubieran sido suficientes para la protección de los

---

<sup>28</sup> Ley 472 de 1998, artículo 27.

Expediente No. 25000-23-27-000-2001-0479-01  
Acumulados Nos. 2000-0428, 2001-0122, 2001-0343  
Actor: GUSTAVO MOYA ÁNGEL Y OTROS  
Acción Popular

derechos e intereses colectivos, como se indicó en la decisión impugnada, no hubieran sido necesarias las complementaciones que realizó en la sentencia, constatándose que las posiciones de cada uno de los organismos, aisladamente formuladas, no otorgaban una adecuada protección a esos intereses difusos.

En estos términos, adujo que el cargo planteado contra la aprobación de los pactos de cumplimiento ordenada en la sentencia debe prosperar y, en consecuencia, debe revocarse el aparte <<Por consiguiente, **SALVAGUÁRDANSE LOS ALUDIDOS DERECHOS COLECTIVOS** mediante la **APROBACIÓN DE LOS PACTOS DE CUMPLIMIENTO** presentados por los entes públicos mencionados en el literal anterior en la forma y términos discutidos y aprobados en las respectivas audiencias por las partes del proceso y con las observaciones y modificaciones de que da cuenta la parte motiva de este fallo y con las órdenes y condenas que se consignarán en ordinal posterior.>>, del numeral 1º de la parte resolutive de la sentencia de 25 de marzo de 2004 y **emprenderse la revisión integral del fallo impugnado**, teniendo en cuenta dos aspectos fundamentales:

- (i) **las competencias y atribuciones legales de las entidades públicas vinculadas al proceso, y**
- (ii) **los problemas asociados a cada una de las cuencas que componen el Bogotá.**

Con relación a la primera, hizo alusión a la normativa que regula las competencias de las autoridades ambientales y de las autoridades departamentales y

Expediente No. 25000-23-27-000-2001-0479-01  
Acumulados Nos. 2000-0428, 2001-0122, 2001-0343  
Actor: GUSTAVO MOYA ÁNGEL Y OTROS  
Acción Popular

municipales previstas en la Constitución Política y la Ley.

Respecto del segundo aspecto, consideró que tanto la sentencia de primera instancia como el Documento CONPES 3320 de 2004, plantean las distintas problemáticas asociadas al río Bogotá, señalando como soluciones, en términos generales y para la **cuenca alta**, el control y tratamiento de los efluentes industriales, la ampliación de coberturas de las redes de alcantarillado en los municipios, la optimización de las plantas de tratamiento de aguas residuales, la conexión de los sistemas de alcantarillado a las mencionadas plantas y el manejo de los vertimientos provenientes de los tratamientos.

Para las **cuenkas media y baja**, el dragado y rectificación del río Bogotá, la ampliación de la planta de tratamiento de aguas residuales de Salitre, la construcción del sistema para el tratamiento de las aguas residuales restantes de la cuenca media (Bogotá y Soacha), la construcción de las obras complementarias de alcantarillado de Bogotá, la recuperación ambiental del Muña, la ampliación de coberturas de alcantarillado de los municipios de la cuenca baja, el saneamiento de los vertimientos de los principales efluentes de la cuenca baja y el manejo de vertimientos especiales como los de los mataderos y rellenos sanitarios.

En ese orden de ideas, planteó como medidas a implementar, las siguientes:

**De la Cuenca Alta:**

Expediente No. 25000-23-27-000-2001-0479-01  
Acumulados Nos. 2000-0428, 2001-0122, 2001-0343  
Actor: GUSTAVO MOYA ÁNGEL Y OTROS  
Acción Popular

- Necesidad de protección del lugar de nacimiento del río, es decir del Páramo de Guacheneque, el cual debe ser catalogado como una zona de protección ambiental y debe ser objeto de control, debido a los cultivos de papa que se desarrollan en sus alrededores.
- Control de vertimientos industriales, producto de las curtiembres ubicadas en el Municipio de Villapinzón y Choconta.
- Recuperación de la ronda del Río Bogotá en el perímetro urbano e industrial del Municipio de Villapinzón, y control de las actividades agrícolas y pecuarias de las empresas localizadas en el mismo municipio.
- Control de vertimientos industriales, agrícolas y pecuarios de las empresas localizadas en los demás municipios de la cuenca alta: Suesca, Sesquilé, Guatavita, Gachancipá, Tocancipá, Nemocón, Cogua, Zipaquirá, Sopó, La Calera, Cajicá, Chía, Cota, Tabio y Tenjo.
- Construcción y adecuación de Plantas de Tratamiento de Aguas Residuales y ejecución y desarrollo de los Planes de Acueducto y Alcantarillado en todos los municipios de esta cuenca.
- Adecuación hidráulica (respeto de la zona de ronda hidráulica y adquisición de predios).

**De la Cuenca Media:**

- Control de vertimientos emanados de las industrias ubicadas en el perímetro urbano de la ciudad de Bogotá, que contaminan el cauce del río Bogotá.
- Control de vertimientos industriales, agrícolas y pecuarios, de las empresas ubicadas en los municipios de Funza, Mosquera, Madrid, Subachoque, El Rosal, Facatativá, Bojacá y Soacha, que arrojan vertimientos en el cauce del río Bogotá.
- Construcción y adecuación de Plantas de Tratamiento de Aguas Residuales y la ejecución y desarrollo de los Planes de Acueducto y Alcantarillado en los

Expediente No. 25000-23-27-000-2001-0479-01  
Acumulados Nos. 2000-0428, 2001-0122, 2001-0343  
Actor: GUSTAVO MOYA ÁNGEL Y OTROS  
Acción Popular

municipios de Funza, Mosquera, Madrid, Subachoque, El Rosal, Facatativá, Bojacá y Soacha.

- Adecuación hidráulica (respeto de la zona de ronda hidráulica y adquisición de predios).

#### **De la Cuenca Baja:**

- Control de vertimientos industriales, agrícolas y pecuarios, de las empresas ubicadas en los municipios de San Antonio del Tequendama, Tena, El Colegio, Anapoima, Viotá, Zipacón, Anolaima, Cachipay, Apulo, La Mesa, Tocaima, Agua de Dios y Girardot.
- Construcción y adecuación de Plantas de Tratamiento de Aguas Residuales y la ejecución y desarrollo de los Planes de Acueducto y Alcantarillado en todos los municipios de esta cuenca.
- Adecuación hidráulica (respeto de la zona de ronda hidráulica y adquisición de predios).

Expuso asimismo, que ante la problemática descrita resulta necesaria la adopción de: "(...) **(i) medidas de carácter reactivo, y (ii) medidas de carácter preventivo.** Las primeras están asociadas a la solución de la contaminación existente (construcción de PTARes en los municipios de la cuenca del Río, ampliación de la PTAR Salitre y construcción de la PTAR Canoas), mientras que las medidas de carácter preventivo están enfocadas a evitar que los fenómenos irregulares que dan lugar a la contaminación, continúen presentándose (control de vertimientos, adecuación de ronda hidráulica, actividades pedagógicas, etcétera).

De otra parte, trajo a colación el documento suscrito por el **Ingeniero Luis Felipe Aparicio Torres, Asesor Adscrito**

Expediente No. 25000-23-27-000-2001-0479-01  
 Acumulados Nos. 2000-0428, 2001-0122, 2001-0343  
 Actor: GUSTAVO MOYA ÁNGEL Y OTROS  
 Acción Popular

**a la Procuraduría Delegada para Asuntos Ambientales y Agrarios:**

"(...)Aspecto 1: PTAR CANOAS.

"(...) Para la concepción de la PTAR Canoas se realizaron dos estudios, uno en el 2003 y el otro en el 2008; el primero denominado "Prediseño de la Planta de Tratamiento de Aguas Residuales de Canoas", realizado por Carlos Alberto Giraldo López y el segundo "Pre-dimensionamiento de la Planta de Tratamiento de Aguas Residuales de Canoas", realizado por la firma HMV Ingenieros Ltda., con la asesoría internacional de ingenieros de la firma POYRY.

Actualmente, se encuentra en desarrollo, el contrato de consultoría, por parte de la EAAB, para realizar el diseño a nivel de Ingeniería de Detalle de la Planta de Tratamiento de Aguas Residuales Canoas en los componentes asociados al Tratamiento Primario con Asistencia Química, con la firma CDM - INGESAM, contrato N° 1-02-25500-0690-2011, por un valor inicial de \$ 25.720.406.841=, y un plazo de ejecución de 26 meses (...).

(...)Adicionalmente, se deben mencionar, los siguientes Acuerdos y Convenios, que se han firmado y se han establecido para la Descontaminación del río Bogotá:

-Mediante ACUERDO INTERINSTITUCIONAL, suscrito el 24 de noviembre de 2006, entre la CAR, el DAMA (hoy SECRETARÍA DISTRITAL DE AMBIENTE) y la EAAB, con el acompañamiento del MINISTERIO DE AMBIENTE VIVIENDA Y DESARROLLO TERRITORIAL - MAVDT, se acordó que con los recursos de la CAR provenientes del 50% del porcentaje ambiental del Distrito Capital, se ejecutarán hasta su terminación los siguientes proyectos:

- Ampliación y Optimización de la PTAR, provenientes de la cuenca del río Salitre hasta obtener agua para uso agrícola y,
- La Adecuación Hidráulica del río Bogotá, reconociéndole a la CAR, autonomía administrativa, técnica y financiera para definir el diseño y la tecnología apta para el efecto.

Adicionalmente, la EAAB con cargo a recursos del Distrito Capital y tarifas, se compromete a ejecutar, operar y mantener los siguientes proyectos:

Expediente No. 25000-23-27-000-2001-0479-01  
 Acumulados Nos. 2000-0428, 2001-0122, 2001-0343  
 Actor: GUSTAVO MOYA ÁNGEL Y OTROS  
 Acción Popular

- Obras complementarias y obras para el manejo de caudales en la Cuenca del río Salitre
- Interceptor ENGATIVÁ - CORTIJO
- Interceptor FUCHA - TUNJUELO
- Interceptor TUNJUELO - CANOAS
- Estación Elevadora del TUNJUELO y
- Estación Elevadora de CANOAS
- Adicionalmente la Operación y Mantenimiento de las PTARs.

-Convenio Interadministrativo entre la CAR - Distrito Capital - Secretaría de Ambiente y EAAB, N° 171 de 2007; con cargo a la CAR - FIAB (Fondo para las inversiones Ambientales en la Cuenca del río Bogotá): Ampliación y Tratamiento Secundario en la PTAR Salitre, adecuación hidráulica del río Bogotá; con recursos del Distrito y/o EAAB, interceptores Engativá -Cortijo, Fucha - Tunjuelo y Tunjuelo - Canoas, Estaciones Elevadoras de Tunjuelo y Canoas y obras complementarias, construcción y operación de la PTAR CANOAS; de la SDA, adelantar el trámite ante el MAVDT todas las gestiones y actuaciones necesarias y relacionadas con la Licencia Ambiental del Proyecto para la Descontaminación del río Bogotá, en el propósito de ceder a favor de la EAAB la titularidad de la misma.

-El Gobierno Nacional a través del Ministerio de Ambiente, Vivienda y Desarrollo Territorial y el Departamento Nacional de Planeación, la Gobernación de Cundinamarca, la Corporación Autónoma Regional de Cundinamarca - CAR, el Distrito Capital y la Empresa de Acueducto y Alcantarillado de Bogotá, suscribieron el día 21 de febrero de 2011, el Acuerdo de Cooperación para la Construcción de la Planta de Tratamiento de Aguas Residuales de Canoas (Fase I y II) y su Estación Elevadora dentro del Programa de Saneamiento del río Bogotá, en el contexto de la Región Capital, Bogotá - Cundinamarca.

-La EAAB, y el Distrito presentaron el pasado 29 de noviembre de 2011 al Ministerio de Vivienda, Ciudad y Territorio, el proyecto "CONSTRUCCIÓN DE LA ESTACIÓN ELEVADORA DE AGUAS RESIDUALES CANOAS PARA EL DISTRITO CAPITAL DE BOGOTÁ", para su consideración y estudio.

-De igual manera la EAAB y EMGESA, celebraron el día 5 de diciembre un Convenio Interinstitucional para aunar esfuerzos para garantizar la construcción y operación de la Estación Elevadora de Aguas Residuales Canoas, mediante aporte económico y de operación que ofrece EMGESA.

➤ Otro aspecto a tener en cuenta es el de la generación de Energía, que desde la década de los 50, con el Embalse del Muña y con el propósito de abastecer de Energía a la Ciudad de Bogotá, se construyó dicho Embalse alimentado

Expediente No. 25000-23-27-000-2001-0479-01  
 Acumulados Nos. 2000-0428, 2001-0122, 2001-0343  
 Actor: GUSTAVO MOYA ÁNGEL Y OTROS  
 Acción Popular

por las fuentes hídricas del río Muña y el río Aguas Claras y el río Bogotá que en ese momento se encontraba en buen estado de calidad.

Esta generación de energía se denomina Cadena Pagua, que alimenta las centrales denominadas PARAISO y GUACA, compuestas por dos centrales de generación que utilizan la caída del agua para impulsar los generadores, garantizando el suministro de Energía para 2,6 millones de usuarios ubicados en Bogotá y su zona de influencia.

De igual manera blinda a Bogotá y a los municipios aledaños de posibles racionamientos de energía o pérdida total del servicio que puedan llegar a evolucionar hasta un apagón del área. Su no funcionamiento no garantizaría el suministro de energía con calidad y confiabilidad para los usuarios del sur de Bogotá, generando eventualmente racionamientos y cortes de servicio, perdiendo una generación de Energía de más de 4000 GWh año, es decir como el 7% de la demanda nacional.

- La no construcción de la PTAR CANOAS, iría en contra del documento CONPES 3320 de 2004, que es el que define la estrategia y política para el saneamiento ambiental del río Bogotá y adopta la PTAR CANOAS presentada por la EAAB y compatibiliza el Saneamiento del río Bogotá con la generación de energía eléctrica.

- La no construcción de la PTAR CANOAS, iría en contra de la Sentencia del 25 de agosto de 2004, dentro de la Acción Popular, en donde aprueba el Pacto de Cumplimiento propuesto por la EAAB, en donde ordena la ejecución de la alternativa 4, en donde se considera PTAR CANOAS Y Estación Elevadora de Canoas. De igual manera en dicha sentencia se aprobó el Pacto de Cumplimiento presentado por EMGESA y la EEB, para mitigar los impactos del Muña.

- Al respecto de los Impactos y las obras que se han realizado en el Muña, cuyos costos han sido muy elevados, es importante anexar, el Concepto Técnico elaborado por la misma Delegada Ambiental y Agraria, sobre una diligencia de apoyo al Juzgado Veintiuno Administrativo del Circuito de Bogotá, Sección Segunda, de fecha del 11 de marzo del 2013, para precisamente verificar las obras adelantadas, en donde la Procuraduría exalta la albor y el manejo técnico ambiental que en el Muña se ha realizado".

Consideró, entonces, la Procuraduría, en su parte técnica, que el sistema adoptado debe ser PTAR CANOAS con visión integral de cuenca, con un trabajo regional e

Expediente No. 25000-23-27-000-2001-0479-01  
Acumulados Nos. 2000-0428, 2001-0122, 2001-0343  
Actor: GUSTAVO MOYA ÁNGEL Y OTROS  
Acción Popular

interinstitucional en las Cuencas alta, media y baja, para lo cual reclama acciones en los siguientes aspectos:

CUENCA ALTA: (Villapinzón - By Pass Juan Amarillo)

- Protección especial del Páramo de Guacheneque, desde su nacimiento hasta el Municipio de Villapinzón, con el control de su ronda, zampa (Zona de protección ambiental) y el control de uso de agroquímicos de cultivos en especial de papa, que se desarrollan en sus alrededores.
  - Control de Vertimientos (cromo y tanino), provenientes de las Curtiembres del Municipio de Villapinzón.
  - Recuperación de la ronda del río Bogotá en el perímetro urbano e industrial del Municipio de Villapinzón.
  - Control de Vertimientos Industriales de las empresas ubicadas en esta Cuenca alta, teniendo en cuenta los municipios de Villapinzón, Chocontá, Suesca, Sesquilé, Guatavita, Gachancipá, Tocancipá, Nemocón, Cogua, Zipaquirá, Sopó, La Calera, Cajicá, Chía, Cota, Tabio y Tenjo.
  - Construcción y Adecuación de las Plantas de Tratamiento de Aguas Residuales y la ejecución y desarrollo de los Planes de Acueducto y Alcantarillado, de los municipios de Villapinzón, Chocontá, Suesca, Sesquilé, Guatavita, Gachancipá, Tocancipá, Nemocón, Cogua, Zipaquirá, Sopó, La Calera, Cajicá, Chía, Cota, Tabio y Tenjo.
  - Adecuación Hidráulica del río Bogotá, desde Villapinzón hasta el By Pass de Juan Amarillo, en una longitud aproximada de 161,4 Kilómetros.

CUENCA MEDIA: (By Pass Juan Amarillo - Alicachín)

Expediente No. 25000-23-27-000-2001-0479-01  
Acumulados Nos. 2000-0428, 2001-0122, 2001-0343  
Actor: GUSTAVO MOYA ÁNGEL Y OTROS  
Acción Popular

- Control de Vertimientos Industriales de las empresas ubicadas en esta Cuenca, teniendo en cuenta los municipios de Funza, Mosquera, Madrid, Subachoque, El Rosal, Facatativá, Bojacá y Soacha.
- Construcción y Adecuación de las Plantas de Tratamiento de Aguas Residuales y la ejecución y desarrollo de los Planes de Acueducto y Alcantarillado, de los municipios de Funza, Mosquera, Madrid, Subachoque, El Rosal, Facatativá, Bojacá y Soacha.
- Adecuación Hidráulica del río Bogotá, desde By Pass Juan Amarillo hasta Alicachín, en una longitud aproximada de 51,5 kms.

CUENCA BAJA (Alicachín - Girardot):

- Control de Vertimientos Industriales de las empresas ubicadas en esta Cuenca, teniendo en cuenta los municipios de San Antonio del Tequendama, Tena, El Colegio, Anapoima, Viotá, Zipacón, Anolaima, Cachipay, Apulo, La Mesa, Tocaima, Agua de Dios y Girardot.
- Construcción y Adecuación de las Plantas de Tratamiento de Aguas Residuales y la ejecución y desarrollo de los Planes de Acueducto y Alcantarillado, de los municipios de San Antonio del Tequendama, Tena, El Colegio, Anapoima, Viotá, Zipacón, Anolaima, Cachipay, Apulo, La Mesa, Tocaima, Agua de Dios y Girardot.
- Adecuación Hidráulica del río Bogotá, desde Alicachín hasta Girardot, en una longitud aproximada de 103,3 Kilómetros.

Expediente No. 25000-23-27-000-2001-0479-01  
Acumulados Nos. 2000-0428, 2001-0122, 2001-0343  
Actor: GUSTAVO MOYA ÁNGEL Y OTROS  
Acción Popular

Con relación a los **PLANES MAESTROS DE ACUEDUCTO Y ALCANTARILLADO**, manifestó que constituyen un aspecto de especial importancia, ya que con su elaboración y ejecución, se proporcionará calidad de vida a todas las comunidades y municipios que hacen parte de la Cuenca del río Bogotá, logrando la potabilidad del agua que se consume y la disminución de parámetros contaminantes, lo que contribuiría a reducir los costos en la PTAR CANOAS.

En tal sentido, resaltó que acorde con la sentencia de primera instancia, el Departamento de Cundinamarca debía promover, coordinar y cofinanciar con apoyo de la Nación y del Ministerio de Medio Ambiente, los diseños y ejecución de los respectivos Planes Maestros de Acueducto y Alcantarillado en un plazo que no excediera el año 2009.

Por lo anterior, reclamó acciones inmediatas en todos los municipios que comprenden la Cuenca del río Bogotá, sobretodo en la construcción y eficiencia de las PTAPs, PTARs y la máxima cobertura de servicio en redes de acueducto y alcantarillado.

En cuanto al **CAUDAL ECOLÓGICO y el CAMBIO CLIMÁTICO**, refirió que actualmente un sector importante del río Bogotá muere en épocas de estiaje, y es precisamente desde la captación que de él hace EMGESA, en la Estación de bombeo Muña, cerca de las Compuertas de Alicachín, hasta cuando el agua es vertida nuevamente al Río a la altura del Municipio de El Colegio, que queda completamente seco en verano el sitio conocido como el Salto del Tequendama.

Expediente No. 25000-23-27-000-2001-0479-01  
Acumulados Nos. 2000-0428, 2001-0122, 2001-0343  
Actor: GUSTAVO MOYA ÁNGEL Y OTROS  
Acción Popular

Al tratar dicho aspecto, puso de presente que próximamente culminará la concesión de aguas provenientes del río Bogotá, otorgada por la CAR mediante Resoluciones N° 603 de 1997 y 1014 de 1998, a EMGESA, razón por la cual exigió, la determinación de este importante caudal ecológico, si es que no debe ser de manera inmediata, con algún tipo de compensación ambiental para tan importante región que desde entonces quedó privada de tan importante caudal.

Solicitó asimismo tener en cuenta, en cada uno de los proyectos a realizar, su adecuación a los efectos producidos y encadenados con el cambio climático, sobretodo en la protección de las zonas de amortiguación, rondas y zonas de protección ambiental en el río Bogotá, como en todos sus afluentes.

**De otro parte, en lo atinente al PARQUE INDUSTRIAL SAN BENITO Y VILLAPINZÓN, manifestó no estar** en contra del desarrollo de las industrias, como es el caso de las curtiembres que se desarrollan en la cuenca Río Bogotá, pero el daño de sus descargas o vertimientos a lo largo del río Bogotá es grande, y requiere de altos costos para su descontaminación, razón por la cual exigió una gran atención por parte de la CAR en Villapinzón, y de la Secretaría del Medio Ambiente en San Benito, para efectos de delimitar de su parque industrial y el respectivo tratamiento.

Nótese que la posición institucional antes referida, coincide con la mayor parte de los planteamientos y con

Expediente No. 25000-23-27-000-2001-0479-01  
Acumulados Nos. 2000-0428, 2001-0122, 2001-0343  
Actor: GUSTAVO MOYA ÁNGEL Y OTROS  
Acción Popular

la visión integral de cuenca, contenida en el Documento CONPES 3320, el que no obstante haberse elaborado en el año 2004, mantiene vigencia y resulta siendo válido en cuanto al Plan Estratégico y a los Planes de Acción que deben adoptarse para la solución integral de la problemática del Río.

Resaltó igualmente que el Documento CONPES 3320 recoge, casi integralmente, las decisiones que para efectos de la SOLUCIÓN INTEGRAL DE LA PROBLEMÁTICA DEL RIO BOGOTÁ, se encuentran consignadas en la sentencia de primera instancia proferida por el Tribunal Administrativo de Cundinamarca y que hoy es objeto de apelación.

Así las cosas, precisó que a diferencia de lo planteado por el actor popular y algunos de los coadyuvantes, existen razones técnicas y económicas, referidas por el Ingeniero Aparicio Torres, que hacen evidente la conveniencia de adoptar la denominada **alternativa 4 para la solución de la problemática del río Bogotá**, cuya premisa fundamental radica en la construcción de la PTAR CANOAS en el Municipio de Soacha -con una estación elevadora-. Dicha alternativa, que fue propuesta por la Empresa de Acueducto y Alcantarillado de Bogotá y acogida, en su oportunidad, por las demás entidades públicas vinculadas al proceso y concernidas en esta materia, fue también avalada por el tribunal de primera instancia; además, se encuentra articulada con otras dos **medidas de carácter reactivo**, consistentes en la ampliación de la PTAR Salitre y la construcción u optimización de las PTARes de los municipios ubicados en la cuenca del Río.

Expediente No. 25000-23-27-000-2001-0479-01  
Acumulados Nos. 2000-0428, 2001-0122, 2001-0343  
Actor: GUSTAVO MOYA ÁNGEL Y OTROS  
Acción Popular

Agregó que las entidades públicas del orden nacional, regional, departamental y distrital, esto es: la Alcaldía Mayor de Bogotá, la Secretaría de Hacienda Distrital, la Empresa de Acueducto y Alcantarillado de Bogotá, la Corporación Autónoma Regional, la Gobernación de Cundinamarca, el Departamento Nacional de Planeación y el Ministerio de Medio Ambiente y Desarrollo Territorial, además de haber suscrito los múltiples acuerdos detallados en el numeral 3° del concepto, recientemente convergieron en participar en el Convenio de fecha 21 de febrero de 2011, por medio del cual acordaron adelantar ante las autoridades competentes, los trámites necesarios para la financiación de la construcción de la planta de tratamiento de aguas residuales de Canoas y su Estación Elevadora, para los caudales de aguas residuales de las cuencas de los ríos Fucha, Tintal, Tunjuelo y Soacha, en dos fases así:

*[...] Fase I - Tratamiento primario o primario químicamente asistido de hasta 14 metros cúbicos por segundo y su estación elevadora: La Nación - Bogotá D.C., LA Empresa de Acueducto y Alcantarillado de Bogotá, ESP - EAAB, y el Departamento de Cundinamarca, de conformidad con el anexo financiero indicativo y de acuerdo con los resultados de los estudios técnicos respectivos.*

*Fase II - Tratamiento secundario. La Corporación Autónoma Regional de Cundinamarca - CAR participará en la financiación de la construcción de la segunda fase de la PTAR Canoas, una vez concluya o liberen los recursos comprometidos en el Convenio 171 de 2007 suscrito entre la CAR, Bogotá D.C. y la EAAB (utilizado como fuente de*

Expediente No. 25000-23-27-000-2001-0479-01  
 Acumulados Nos. 2000-0428, 2001-0122, 2001-0343  
 Actor: GUSTAVO MOYA ÁNGEL Y OTROS  
 Acción Popular

*recursos el 7.5.% del porcentaje ambiental del total del recaudo por concepto del impuesto predial de Bogotá D.C. y los rendimientos financieros de esta fuente de conformidad con las normas que regulan la materia). Para este fin, el Gobierno Nacional se compromete a tramitar ante las instancias competentes la norma que garantice la permanencia del contenido del artículo 102 de la Ley 1151 de 2007. [...]*

Estableció a su vez, que las mismas partes, como se reseñó en otro acápite del concepto, mediante un acuerdo con fuerza vinculante para ellas -corrigiendo los yerros de la sentencia de primera instancia, puestos de relieve por el Procurador Tercero Judicial Administrativo-, distribuyeron sus compromisos financieros y técnicos en la siguiente forma:

[...] PTAR CANOAS SU ESTACIÓN ELEVADORA

*Costos estimados de referencia (pesos de 2010) y  
 TM \$1.921*

*Fase I:*

- *PTAR Canoas tratamiento primario o primario químicamente asistido de hasta 14 metros cúbicos por segundo: hasta \$750 mil millones.*

*Fase II:*

- *PTAR Canoas Tratamiento secundario de hasta 14 metros cúbicos por segundo: hasta \$906 mil millones.*

Adicionalmente, señaló que el 5 de diciembre de 2011, la Empresa de Acueducto y Alcantarillado de Bogotá E.S.P. y EMGESA S.A. E.S.P. celebraron un convenio interinstitucional cuyo objeto consistió en "aunar esfuerzos para garantizar la construcción de la Estación Elevadora Canoas, mediante aporte económico y de

Expediente No. 25000-23-27-000-2001-0479-01  
Acumulados Nos. 2000-0428, 2001-0122, 2001-0343  
Actor: GUSTAVO MOYA ÁNGEL Y OTROS  
Acción Popular

*operación que ofrece EMGESA, en los términos y condiciones que se establecen en el presente convenio", en la suma de \$84.048.000.000 de diciembre de 2010, cuyo desembolso se encuentra condicionado a que se otorgue la "(...)concesión en un plazo similar y en condiciones que resulten económicamente rentables y socialmente benéficas (...)".*

En ese orden de ideas, consideró la Procuraduría Delegada que tanto lo convenido en el acuerdo de voluntades multilateral de 21 de febrero de 2011, como lo pactado entre la EAAB y EMGESA S.A. el 5 de diciembre del mismo año, son un claro desarrollo de lo que las mismas partes se habían comprometido a ejecutar desde el mismo Convenio 171 de 2007.

En consecuencia, en la medida en que las obligaciones que asumieron las distintas entidades públicas que suscribieron los referidos acuerdos, se enmarcan dentro de las competencias legales, a su juicio, lo allí pactado tiene fuerza vinculante para ellas, y su contenido, necesariamente debe ser cumplido, como bien lo dispone el artículo 1.602 del Código Civil al señalar: **"Todo contrato legalmente celebrado es una ley para los contratantes, y no puede ser invalidado sino por su consentimiento mutuo o por causas legales".**

**De otro lado, refirió que** en este proceso merece especial atención, lo concerniente al manejo de los vertimientos y del recurso hídrico.

**Expediente No. 25000-23-27-000-2001-0479-01**  
**Acumulados Nos. 2000-0428, 2001-0122, 2001-0343**  
**Actor: GUSTAVO MOYA ÁNGEL Y OTROS**  
**Acción Popular**

En tal sentido, adujo que el Decreto 3930 de 2010, Plan de Gestión del Riesgo para el manejo de Vertimientos, busca el desarrollo integral de la figura del ordenamiento del recurso hídrico, privilegiando herramientas de planificación; ajustando el procedimiento para el otorgamiento de los permisos de vertimientos y generando planes de cumplimiento que permitan la reglamentación de los mismos.

En virtud de ello, estableció que dicha norma es sin duda, de suma importancia en el presente tema, y ha sido desarrollada en el proceso de ordenación de la cuenca del Río Bogotá; empero, el Ministerio de Ambiente, Vivienda y Desarrollo Territorial, hoy Ministerio de Ambiente y Desarrollo Territorial, ha inobservado lo consagrado en el artículo 28 del citado decreto, sobre la expedición de normas de vertimientos puntuales a las aguas superficiales y a los sistemas de alcantarillado, así como normas de vertimiento al suelo y a las aguas marinas, dentro de los veinticuatro (24) meses, contados a partir de la fecha de publicación de dicho decreto.

A su juicio, la máxima autoridad ambiental del país ha sido omisiva en la reglamentación de las normas de vertimientos, situación que ha conducido a que no se tenga los lineamientos necesarios para el otorgamiento de los permisos de vertimiento, hecho que sin duda va en detrimento de la protección del recurso hídrico del país y, particularmente, del río Bogotá.

Dicho en otros términos, la falta de reglamentación de la autoridad ambiental ha generado que las personas naturales y/o jurídicas que realizan vertimientos a las

Expediente No. 25000-23-27-000-2001-0479-01  
Acumulados Nos. 2000-0428, 2001-0122, 2001-0343  
Actor: GUSTAVO MOYA ÁNGEL Y OTROS  
Acción Popular

fuentes hídricas no hayan tenido elementos suficientes para estructurar los planes de reconversión a tecnologías limpias en la gestión de vertimientos, circunstancia que, a todas luces, ha retrasado el mejoramiento de la calidad de los vertimientos que se realizan al Río Bogotá.

Precisó entonces que para aminorar los impactos de esta situación, es imperativo que la Sala de Decisión, al momento de proferir el fallo de segunda instancia, requiera al Ministerio de Ambiente y Desarrollo Territorial, para que emita la citada reglamentación y estructure un plan de seguimiento y control de implementación de la misma, de forma específica para el río Bogotá, de forma tal que los beneficios planteados en el Decreto 3930 de 2010, efectivamente se concreten.

Adicionalmente, precisó el Ministerio Público que la autoridad ambiental competente, debe desarrollar mecanismos que le permitan materializar, para el Río Bogotá, un estricto plan de seguimiento y monitoreo de lo dispuesto en la **Resolución 1514 de agosto 31 de 2012**, por medio de la cual se adoptan los Términos de Referencia para la Elaboración del Plan de Gestión del Riesgo para el Manejo de Vertimientos, que desarrolla de forma específica el artículo 41 del Decreto 3930 de 2010, según la cual: *"...toda persona natural o jurídica cuya actividad o servicio genere vertimiento a las aguas superficiales, marinas o al suelo, deberá solicitar y tramitar ante la autoridad ambiental competente, el respectivo permiso de vertimientos"*.

Adujo que el objeto de la citada resolución es garantizar que el generador del vertimiento cuente con un plan que

Expediente No. 25000-23-27-000-2001-0479-01  
Acumulados Nos. 2000-0428, 2001-0122, 2001-0343  
Actor: GUSTAVO MOYA ÁNGEL Y OTROS  
Acción Popular

no solo analice el riesgo del vertimiento, sino que contenga las medidas de prevención y mitigación del impacto generado, protocolos de emergencia y contingencia, así como un programa de rehabilitación y recuperación.

En ese orden de ideas, consideró necesario que en el fallo de segunda instancia, se imponga a las autoridades ambientales, bien sea a la CAR que tiene competencia jurisdiccional en el área y/o a la AUTORIDAD NACIONAL DE LICENCIAS AMBIENTALES - ANLA -**en tanto a esta última compete la expedición de la Licencia Ambiental respecto de la PTAR Canoas, junto con su respectivo permiso de vertimientos, de conformidad con el Decreto 2820 de 2010-**, el deber consistente en que en las licencias y/o permisos de vertimientos que hayan otorgado o que otorguen con posterioridad a la entrada en vigencia de la citada Resolución 1514 de 31 de agosto de 2012 -respecto de vertimientos al Río Bogotá-, procedan a exigir el Plan de Gestión de Riesgos para el Manejo de Vertimientos y realicen un seguimiento riguroso a su ejecución.

**Ahora bien, sobre las COMPENSACIONES POR PÉRDIDA DE BIODIVERSIDAD, resaltó la importancia de que** las autoridades ambientales, bien sea la Autoridad Nacional de Licencias - ANLA o la Corporación Autónoma Regional de Cundinamarca, tomen las medidas de compensación, mitigación y restauración necesarias en todas las licencias y/o permisos que concedan a obras, proyectos o actividades en las que se involucre, directa o indirectamente al río Bogotá.

Expediente No. 25000-23-27-000-2001-0479-01  
Acumulados Nos. 2000-0428, 2001-0122, 2001-0343  
Actor: GUSTAVO MOYA ÁNGEL Y OTROS  
Acción Popular

En tal sentido, adujo que en el fallo de la presente acción popular, deben tomarse las medidas necesarias para garantizar el cumplimiento de lo expuesto en la Resolución **No. 1517 de 31 de agosto de 2012**, que establece para las personas naturales y/o jurídicas, la obligación de elaborar y presentar para el medio biótico, las medidas de compensación de sus obras, proyectos o actividades, dentro del marco del denominado Manual para la Asignación de Compensaciones por pérdida de biodiversidad.

Así entonces, estimó necesario que las autoridades ambientales, tanto la ANLA como la CAR, tengan un manejo conjunto sobre las diferentes compensaciones que realizan los titulares de licencias y/o permisos en la áreas de protección del río Bogotá, y puedan direccionar la ejecución de las medidas a fin de lograr efectivas acciones de recuperación de la fuente hídrica, así como direccionar las obligaciones de compensación y mitigación, impuestas en los diferentes actos administrativos por medio de los cuales conceden licencias y/o permisos en el área de la cuenca del Río Bogotá, bien sea como Área de Influencia Directa o Indirecta.

Con relación al **EJERCICIO EFICIENTE DE LA POTESTAD SANCIONATORIA EN MATERIA AMBIENTAL**, estableció que los procesos sancionatorios ambientales a cargo de la CAR, no tienen la celeridad debida ni han dado los resultados esperados, como quiera que los vertimientos ilegales de carácter industrial, agrícola y pecuario, continúan

Expediente No. 25000-23-27-000-2001-0479-01  
 Acumulados Nos. 2000-0428, 2001-0122, 2001-0343  
 Actor: GUSTAVO MOYA ÁNGEL Y OTROS  
 Acción Popular

presentándose, en forma tan evidente que constituyen un hecho notorio.

Consideró igualmente, que la autoridad ambiental ha tenido, en el desarrollo de las facultades conferidas por la Ley 1333 de 2009, una actuación importante por el número de procesos sancionatorios que reportan (ver anexo); sin embargo, ésta debe ser más eficiente y eficaz, pues de dicha vigilancia y seguimiento depende que las medidas que se están tomando perduren en el tiempo.

Finalmente, con fundamento en los argumentos previamente expuestos, precisó el Ministerio Público que al efectuarse la revisión de la sentencia impugnada, proferida el 25 de marzo de 2004 por la Subsección "B" de la Sección Cuarta del Tribunal Administrativo de Cundinamarca, resulta procedente:

**"Confirmar:** Los ordinales PRIMERO; TERCERO, literales a), b), d), e), f), g), h), j), k), l), ll), m), ñ), o), p), q), r), s), t), u), v) y x); CUARTO, literales a), b), ch), d), e) y h); OCHO; NUEVE; DIEZ; ONCE y DOCE.

**Modificar:** El ordinal TERCERO, literal i), en tanto la obligación del manejo de la Red Hidrometeorológica y la Estación de Monitoreo de Aguas, es un asunto de competencia de la Corporación Autónoma Regional y no del IDEAM; el ordinal CUARTO, literal c) en tanto la obligación allí contenida corresponde a los respectivos municipios y no a la Corporación Autónoma Regional; el ordinal CUARTO, literales f) y g), dado que no pueden aprobarse pactos de cumplimiento parciales, por lo que los acuerdos celebrados deben entenderse como obligaciones a cargo de quienes los suscribieron; el ordinal

Expediente No. 25000-23-27-000-2001-0479-01  
Acumulados Nos. 2000-0428, 2001-0122, 2001-0343  
Actor: GUSTAVO MOYA ÁNGEL Y OTROS  
Acción Popular

QUINTO, teniendo en cuenta que debe imponerse la obligación del cumplimiento de los acuerdos celebrados el 21 de febrero y el 5 de diciembre de 2011, a los que se hizo referencia anteriormente, e implementarse las medidas relativas a la protección del caudal ecológico referidas por el Ingeniero Aparicio Torres; y el ordinal SEXTO, dado que no pueden aprobarse pactos de cumplimiento parciales, por lo que los acuerdos celebrados deben entenderse como obligaciones a cargo de quienes los suscribieron.

Sin embargo, en lo concerniente a las obligaciones que se impondrán a la Corporación Autónoma Regional CAR y a la Empresa de Acueducto y Alcantarillado de Bogotá, EAAB, considera procedente que se **modulen los alcances de las obligaciones a desarrollar**, reconociendo los avances y ejecutorias respecto de las medidas de descontaminación del Río y respecto de la adecuación hidráulica, según la información que aparece de folios 94 a 99 de este concepto. En el mismo sentido, y en cuanto respecta a la empresa EMGESA S.A. E.S.P. y sus actividades de descontaminación del Embalse del Muña, deberá modularse la decisión, teniendo en cuenta las gestiones realizadas y los resultados obtenidos en dicho sentido, según lo registra el documento anexo, también firmado por el Ingeniero Felipe Aparicio Torres, funcionario adscrito a la Procuraduría Delegada para Asuntos Ambientales y Agrarios.

**Revocar:** Los ordinales SEGUNDO, y TERCERO, literal c) y SEPTIMO de la providencia, éste último en tanto ni el señor Presidente de la República ni el Congreso de la República, fueron vinculados al proceso.

**Adicionar:** Lo relativo a la adopción del **Plan de Gestión del Riesgo para el manejo de Vertimientos, con su respectivo seguimiento; compensaciones por pérdida de biodiversidad, y ejercicio eficiente de la potestad sancionatoria en materia ambiental**, en los términos señalados en el numeral 4° de este concepto".

Expediente No. 25000-23-27-000-2001-0479-01  
Acumulados Nos. 2000-0428, 2001-0122, 2001-0343  
Actor: GUSTAVO MOYA ÁNGEL Y OTROS  
Acción Popular

## CONSIDERACIONES DE LA SALA

Procede la Sala a proferir decisión de segunda instancia en el proceso de la acción popular promovida con el objeto de que se amparen los derechos colectivos de los habitantes de la cuenca hidrográfica del Río Bogotá y sus afluentes, para lo cual se adoptará dentro de una metodología de marco lógico, la decisión correspondiente, previas las siguientes consideraciones:

### I.1. LAS ACCIONES POPULARES - FINALIDAD Y PROCEDENCIA -

La acción popular fue elevada a rango constitucional a partir de la expedición de la Constitución Política de 1991, razón por la cual la Corte Constitucional en sentencia T-466/03, señaló que *"no se trata de mecanismos desconocidos en el ordenamiento jurídico colombiano, por cuanto ya se encontraban consagradas en varias disposiciones del Código Civil, tendientes a la protección de los derechos colectivos, así como en la ley de reforma urbana (Ley 9 de 1989). Con todo, fue el constituyente de 1991 quien se encargó de elevarlas a rango constitucional"*.

En estos términos, las acciones populares y de grupo quedaron contenidas en el artículo 88 de la Carta Política como un instrumento eficaz para amparar los derechos colectivos.

Expediente No. 25000-23-27-000-2001-0479-01  
Acumulados Nos. 2000-0428, 2001-0122, 2001-0343  
Actor: GUSTAVO MOYA ÁNGEL Y OTROS  
Acción Popular

Este instrumento consagrado en la Constitución, busca, como lo ha precisado la Corte Constitucional<sup>29</sup>, "proteger esa categoría de derechos e intereses en cuanto se relacionan con el patrimonio, el espacio, la seguridad y la salubridad públicos, la moral administrativa, el ambiente, la libre competencia y otros de similar naturaleza que se definan por el legislador (...) y su ejercicio, dado su carácter público, "(...)supone la protección de un derecho colectivo, es decir, de un interés que se encuentra en cabeza de un grupo de individuos, lo que excluye motivaciones meramente subjetivas o particulares. No obstante, suponen la posibilidad de que cualquier persona perteneciente a esa comunidad, pueda acudir ante el juez para defender a la colectividad afectada, con lo cual se obtiene de manera simultánea, la protección de su propio interés".

También se caracteriza por su naturaleza eminentemente preventiva, lo que significa al decir de la Corte Constitucional que "no es ni puede ser requisito para su ejercicio, el que exista un daño o perjuicio de los derechos o intereses que se busca amparar, sino que basta que exista la amenaza o riesgo de que se produzca, en razón de los fines públicos que las inspiran. Desde su remoto origen en el derecho romano, fueron concebidas para precaver la lesión de bienes y derechos que comprenden intereses superiores de carácter público y que por lo tanto no pueden esperar hasta la ocurrencia del daño (...) <sup>30</sup>.

---

<sup>29</sup> Corte Constitucional. Sentencia C-215/99.

<sup>30</sup> Ver sentencia de la Corte Constitucional C-215/99.

Expediente No. 25000-23-27-000-2001-0479-01  
Acumulados Nos. 2000-0428, 2001-0122, 2001-0343  
Actor: GUSTAVO MOYA ÁNGEL Y OTROS  
Acción Popular

Acorde con el inciso 2º del artículo 3º de la Ley 472 de 1998, el objeto de la acción popular radica en evitar el daño contingente, hacer cesar el peligro, la amenaza, la vulneración o agravio sobre los derechos e intereses colectivos, o restituir las cosas a su estado anterior cuando ello fuere posible. Por su parte, el artículo 9º de la misma disposición prevé que tal instrumento procede contra toda acción u omisión de las autoridades públicas o de los particulares.

Dentro de este marco, vale la pena recordar que son dos los supuestos básicos para que proceda la acción en comento, tal como bien lo anotó la Corte Constitucional en la sentencia T-710/08

*"Supuestos básicos para que proceda la acción popular son: a) que se trate de situaciones actuales que impliquen un peligro contingente, una amenaza, vulneración o agravio de uno o varios derechos o intereses colectivos y b) que esas situaciones se deban a acciones u omisiones de autoridades públicas o de particulares. Ambos supuestos deben ser demostrados de manera idónea en el proceso respectivo".*

Como supuesto adicional y de relevancia legal y jurisprudencial, esta Corporación ha recalcado que además de que se presente a) una acción u omisión de la parte demandada, b) un daño contingente, peligro, amenaza, vulneración o agravio de derechos o intereses colectivos; peligro o amenaza que no es en modo alguno la que proviene de todo riesgo normal de la actividad humana, sino también c) la existencia de la relación de

Expediente No. 25000-23-27-000-2001-0479-01  
Acumulados Nos. 2000-0428, 2001-0122, 2001-0343  
Actor: GUSTAVO MOYA ÁNGEL Y OTROS  
Acción Popular

causalidad entre la acción, la omisión, y la señalada afectación de los referidos derechos e intereses<sup>31</sup>.

Ahora bien y en razón de su naturaleza, la acción popular carece de contenido subjetivo, y por su carácter público, procede *"contra las autoridades públicas por sus acciones y omisiones y por las mismas causas, contra los particulares; su tramitación es judicial y la ley debe proveer sobre ellas atendiendo a sus fines públicos y concretos, no subjetivos ni individuales"*<sup>32</sup>.

Cabe anotar que las acciones populares tienen carácter restitutorio, es decir, buscan, cuando ello fuere posible, volver las cosas al estado anterior a la violación del derecho, toda vez que su objeto radica en proteger de manera efectiva el interés colectivo, razón por la cual corresponde al juez determinar si es posible dicho restablecimiento, porque de no serlo procede una indemnización, teniendo claro que la acción popular no persigue un beneficio pecuniario.

Adicionalmente, ha dicho la Corte en la sentencia T-466/03 que *"estas acciones tienen una estructura especial que la diferencia de los demás procesos litigiosos, en cuanto no son en estricto sentido una controversia entre partes que defienden intereses subjetivos, sino que se trata de un mecanismo de protección de los derechos*

---

<sup>31</sup>Consejo de Estado, Sala de lo Contencioso Administrativo, Sección Primera, Consejero ponente: Dr. Marco Antonio Velilla Moreno, Bogotá, D.C., dieciocho (18) de marzo dos mil diez (2010). Ra.: 2004 - 01513(AP). Actor: Eulalio Ramírez Brandt, Demandado: Municipio de Soacha.

<sup>32</sup> Ver sentencia de la Corte Constitucional T-405/93 Magistrado Ponente: Dr. Hernando Herrera Vergara.

Expediente No. 25000-23-27-000-2001-0479-01  
Acumulados Nos. 2000-0428, 2001-0122, 2001-0343  
Actor: GUSTAVO MOYA ÁNGEL Y OTROS  
Acción Popular

*colectivos preexistentes radicados para efectos del reclamo judicial en cabeza de quien actúa a nombre de la sociedad, pero que igualmente están en cada uno de los miembros que forman la parte demandante de la acción judicial".*

Dentro de este contexto la acción popular se encuentra vinculada estrechamente con el principio de solidaridad consagrado en la Constitución Política, esto es, que *"constituye un mecanismo por medio del cual los ciudadanos intervienen en las decisiones que los afectan para asegurar el cumplimiento de los fines del Estado"*<sup>33</sup>.

De otro lado, el artículo 88 de la Carta menciona con carácter enunciativo algunos derechos susceptibles de ser protegidos a través de las acciones populares, catálogo que fue ampliado en la Ley 472 de 1998, por expreso mandato del artículo superior mencionado.

En estos términos, el artículo 4º de la referida ley, definió como derechos e intereses colectivos: a) el goce a un ambiente sano; b) la moralidad administrativa; c) la existencia del equilibrio ecológico y el manejo y aprovechamiento racional de los recursos naturales para garantizar su desarrollo sostenible, su conservación, restauración o sustitución. La conservación de las especies animales y vegetales, la protección de áreas de especial importancia ecológica, de los ecosistemas situados en las zonas fronterizas, así como los demás intereses de la comunidad relacionados con la preservación y restauración del medio ambiente; d) el

---

<sup>33</sup> Ver sentencia de la Corte Constitucional C-630/11.

Expediente No. 25000-23-27-000-2001-0479-01  
Acumulados Nos. 2000-0428, 2001-0122, 2001-0343  
Actor: GUSTAVO MOYA ÁNGEL Y OTROS  
Acción Popular

goce del espacio público y la utilización y defensa de los bienes de uso público; e) la defensa del patrimonio público; f) la defensa del patrimonio nacional y cultural de la Nación; g) la seguridad y salubridad públicas; h) el acceso a una infraestructura de servicios que garantice la salubridad pública; i) la libre competencia económica; j) el acceso a los servicios públicos y a que su prestación sea eficiente y oportuna; k) la prohibición de la fabricación, importación, posesión, uso de armas químicas, biológicas y nucleares, así como la introducción al territorio nacional de residuos nucleares y tóxicos; l) el Derecho a la seguridad y prevención de desastres previsibles técnicamente; m) la realización de las construcciones, edificaciones y desarrollos urbanos respetando las disposiciones jurídicas, de manera ordenada, y dando prevalencia al beneficio de la calidad de vida de los habitantes; n) los derechos de los consumidores y usuarios.

Asimismo, el precitado artículo dispone que además de los derechos e intereses colectivos enunciados en el artículo 88 de la Carta Política, lo sean también los definidos como tales en las leyes ordinarias y los Tratados de Derecho Internacional celebrados por Colombia.

*Otra de las características de la acción popular es la relacionada con la autonomía del instrumento judicial. En efecto, esta Sección<sup>34</sup> ha indicado que "esta acción constitucional es autónoma y principal, no es viable que*

---

<sup>34</sup>Consejo de Estado, Sala de lo Contencioso Administrativo, Sección Primera, Consejero Ponente: Dr. Rafael E. Ostau De Lafont Pianeta, Bogotá, D. C., trece (13) de mayo del dos mil cuatro (2004), Rad.: 1999-0557(AP), Actor: Reynaldo Muñoz Cabrera.

Expediente No. 25000-23-27-000-2001-0479-01  
Acumulados Nos. 2000-0428, 2001-0122, 2001-0343  
Actor: GUSTAVO MOYA ÁNGEL Y OTROS  
Acción Popular

*se formulen reparos para su ejercicio, diferentes a los que corresponden a las reglas procesales propias para su admisibilidad (artículo 18 ley 472 de 1998); por consiguiente, no resulta viable, ni legítimo, que se haga pender la admisión de la acción popular de la procedencia o no de otras acciones principales o subsidiarias, por cuanto la acción popular tiene como objetivo específico y puntal el proteger a los derechos o intereses colectivos invocados con la demanda".*

Siguiendo lo anterior, se encuentra el artículo 16 de la Ley 472 de 1998, el cual es claro en señalar que la Jurisdicción de lo Contencioso Administrativo conocerá de los procesos que se susciten con ocasión del ejercicio de las acciones populares originadas en actos, acciones u omisiones de las entidades públicas y de las personas privadas que desempeñen funciones administrativas, de conformidad con lo previsto en las disposiciones vigentes sobre la materia.

En tal sentido, ha afirmado el Consejo de Estado que las conductas violatorias de derechos colectivos, generadoras de la acción popular, están originadas por regla general, en el ejercicio de la función regulada en el artículo 209 de la Constitución Política, según el cual "la función administrativa está al servicio de los intereses generales y se desarrolla con fundamento en los principios de igualdad, moralidad, eficacia, economía, celeridad, imparcialidad y publicidad, mediante la descentralización, la delegación y la desconcentración de funciones"; principios que son objeto de control a través de la acción popular, con miras al estudio de los

Expediente No. 25000-23-27-000-2001-0479-01  
Acumulados Nos. 2000-0428, 2001-0122, 2001-0343  
Actor: GUSTAVO MOYA ÁNGEL Y OTROS  
Acción Popular

procedimientos donde presuntamente se involucran el abuso de la función administrativa en beneficio individual, y la recuperación de sumas de dinero que se desvían del patrimonio público a causa de la corrupción administrativa. Para el efecto el juez de instancia está investido de amplias facultades, derivadas de la autonomía procesal que ostenta la acción popular y de la finalidad que ésta busca, que no es otra que la protección de los derechos de la comunidad<sup>35</sup>.

Es de resaltar que la acción popular puede ser ejercida por cualquier persona natural o jurídica. Empero, ha destacado la Sala que quien concurre al litigio después de haberse promovido la acción popular por diferente persona, sólo puede acogerse al proceso dentro de los términos en que ésta presenta la demanda, es decir, no le es dable al tercero extenderse en la materia discutida, los móviles o las consecuencias del proceso, puesto que es el actor quien en la demanda, fija el litigio<sup>36</sup>.

Continuando con la descripción de este instrumento, la Sala encuentra el artículo 25 de la Ley 472 de 1998, el cual permite el decreto de medidas cautelares de oficio o a petición de parte, antes de notificada la demanda o en cualquier estado del proceso, con el propósito de

---

<sup>35</sup>Consejo de Estado, Sala de lo Contencioso Administrativo, Sección Cuarta, Consejera ponente: Dra. Ligia Lopez Díaz, Bogotá, D.C., treinta y uno (31) de mayo de dos mil dos (2002), Rad.: 1999 - 9001(AP), Actor: Contraloría General de la República, Demandado: La Nación - Ministerio de Transporte y la Sociedad Dragados y Construcciones de Colombia y del Caribe S.A. Dragacol S.A.

<sup>36</sup>Consejo de Estado, Sala de lo Contencioso Administrativo, Sección Primera, Consejero ponente: Dr. Marco Antonio Velilla Moreno, Bogotá, D.C. veintisiete (27) de mayo de dos mil diez (2010), Rad.: 2003-02137, Actor: Joaquín Augusto Bedoya Rodríguez y otros, Demandado: Departamento Administrativo de Planeación Distrital y otro.

Expediente No. 25000-23-27-000-2001-0479-01  
Acumulados Nos. 2000-0428, 2001-0122, 2001-0343  
Actor: GUSTAVO MOYA ÁNGEL Y OTROS  
Acción Popular

prevenir un daño inminente o para hacer cesar el que se hubiese causado.

Aunado a ello, el artículo 26 ibídem, señala que contra el auto que ordena dichas medidas proceden los recursos de reposición y apelación, los cuales deben ser concedidos en el efecto devolutivo.

En lo atinente al contenido de la sentencia que resuelve la acción popular, la Corte Constitucional en sentencia C-377/02, consideró que la misma *"podrá contener una orden de hacer o de no hacer, exigir la realización de las conductas necesarias para volver las cosas al estado anterior o el pago de una suma de dinero. En el caso de daño a los recursos naturales el juez procurará asegurar la restauración del área afectada destinando para ello una parte de la indemnización. La sentencia tendrá efectos de cosa juzgada respecto de las partes y del público en general"*.

Finalmente y en lo relativo a los actores difusos, se puede afirmar que los intereses o derechos difusos son una realidad nueva para el Derecho Procesal, tanto así que se ha señalado que para su debida protección habrá que hacerse una modificación de las instituciones tradicionales del Derecho en mención.

La esencia del derecho subjetivo radica en el interés que se tenga, razón por la cual hasta hace poco se miraba al derecho subjetivo como la protección de intereses estrictamente individuales, pero sólo a partir del siglo veinte se consideró la defensa de los intereses públicos

Expediente No. 25000-23-27-000-2001-0479-01  
Acumulados Nos. 2000-0428, 2001-0122, 2001-0343  
Actor: GUSTAVO MOYA ÁNGEL Y OTROS  
Acción Popular

bajo la concepción de los derechos públicos subjetivos que vinculaban a toda la colectividad y al Estado mismo, se trata pues de unos intereses supra individuales; su reconocimiento se realizó a partir de la proclamación de la Declaración Americana y la Universal de mediados del siglo veinte, hoy conocidos como derechos de tercera generación, los cuales fueron destinados a tutelar una diversidad de conflictos del colectivo que no tenían un sujeto afectado de manera particular, sino a todo un grupo o categoría social, por eso son también llamados intereses difusos. Así cuando no es posible determinar o identificar plenamente a un grupo de personas procede hablar de interés difuso y esto por la indeterminación en cuanto a la identificación de las personas que lo compone.

De esta manera, el derecho difuso busca la tutela de derechos de un conjunto de sujetos no identificados. Los intereses difusos se reitera, pertenecen a un grupo de personas absolutamente indeterminadas y respecto de las cuales no existe vínculo jurídico alguno, sino que se encuentran unidas por circunstancias de hecho genéricas, accidentales, mutables y eventuales, luego lo que termina haciendo difuso el interés es la imposibilidad de definir individualmente a cada uno de los miembros del grupo afectado.

En relación con este tipo de intereses o derechos debe destacarse que la titularidad es del colectivo y no de la suma de cada uno de los derechos individuales. Además ha de tenerse en cuenta que como el interés le asiste a todo el grupo, cualquiera de ellos está legitimado para

Expediente No. 25000-23-27-000-2001-0479-01  
Acumulados Nos. 2000-0428, 2001-0122, 2001-0343  
Actor: GUSTAVO MOYA ÁNGEL Y OTROS  
Acción Popular

ejercer su derecho de acción representando a las otras personas igualmente afectadas.

## **I.2. LOS DERECHOS E INTERESES COLECTIVOS**

Como se anotó, las acciones populares protegen a la comunidad en sus derechos e intereses colectivos, por lo que, pueden ser promovidas por cualquier persona a nombre de la comunidad cuando ocurra una amenaza o daño a un derecho o interés común; además, por ser intereses que le pertenecen a todos y cada uno de los miembros de la colectividad, se concretan a través de su participación activa ante la administración de justicia.

Los intereses colectivos suponen la restitución de derechos cuyo titular es un grupo indeterminado de personas, como lo señaló la Sección Tercera de esta Corporación en sentencia AP- 527 del 22 de enero de 2003:

*"Los colectivos son intereses de representación difusa, en la medida en que suponen la reivindicación de derechos cuyo titular es un grupo indeterminado o indeterminable de personas que, en potencia, pueden ser, incluso, todos los que integran una comunidad.*

*Por eso ha dicho la Corte Constitucional que, es imposible enmarcar el interés colectivo en un ámbito meramente subjetivo o particular, pero que cualquier persona perteneciente a un grupo o una comunidad puede acudir ante los jueces para exigir la defensa de tal colectividad, con lo cual logra simultáneamente proteger su propio interés.*

*Por otra parte, si bien la Constitución, en el artículo 88, menciona algunos intereses colectivos, tal enumeración no es taxativa, pues,*

Expediente No. 25000-23-27-000-2001-0479-01  
Acumulados Nos. 2000-0428, 2001-0122, 2001-0343  
Actor: GUSTAVO MOYA ÁNGEL Y OTROS  
Acción Popular

la ley o los tratados internacionales pueden calificar como tales otros intereses similares a los contenidos en el artículo 88 de la Carta.

Dicho planteamiento tiene por fundamento lo dispuesto en inciso final del artículo 4 de la Ley 472 de 1998, que prevé:

Igualmente son derechos e intereses colectivos los definidos como tales en la Constitución, las leyes ordinarias y los tratados de derecho internacional celebrados por Colombia."

Lo anterior supone, que si bien no se trata de una enumeración taxativa, sólo pueden considerarse como intereses o derechos colectivos aquellos reconocidos como tales por cualquiera de las normas aludidas y sólo a partir de su reconocimiento son susceptibles de protegerse por medio de la acción popular, de toda acción u omisión de las autoridades públicas y los particulares que, los amenace o vulnere. Es decir, que la calidad de derecho colectivo no la ostentan per se, no surge de su propia naturaleza, sino que es necesario que el ordenamiento jurídico los reconozca como tales.

De modo que, si bien la Sala ha reiterado ciertas características inherentes a los derechos e intereses colectivos, entre ellas, es menester mencionar el reconocimiento -como tales- hecho por la Constitución Política, la ley, o los tratados internacionales que hayan seguido los trámites de recepción por el ordenamiento interno colombiano.

Lo anterior es evidente y, lo ha puesto de presente la Sala, al establecer que si bien un derecho colectivo compromete el interés general, no todo lo que suponga este último configura por esa sola característica, un derecho colectivo, así mismo, el sólo hecho de que una determinada situación, afecte a un número plural de personas, no supone, necesariamente la violación de derechos o intereses colectivos.

Resulta así claro que mientras no se haya producido su reconocimiento legal, no se puede

Expediente No. 25000-23-27-000-2001-0479-01  
 Acumulados Nos. 2000-0428, 2001-0122, 2001-0343  
 Actor: GUSTAVO MOYA ÁNGEL Y OTROS  
 Acción Popular

*considerar que un interés determinado, así tenga carácter general, revista la naturaleza de colectivo; por consiguiente, sólo será derecho colectivo susceptible de ser amenazado o vulnerado por la acción u omisión de las autoridades públicas o los particulares, aquél que, reuniendo las características propias del interés colectivo, esté reconocido como tal por la ley, la constitución o los tratados internacionales".*

#### **I.2.1. DERECHO AL GOCE DE UN AMBIENTE SANO**

En materia ambiental en Colombia, con la expedición del Código de Recursos Naturales (Decreto 2811 de 1974) se estableció<sup>37</sup> el derecho de toda persona a gozar de un ambiente sano.

No obstante lo anterior, el paso trascendental se produjo con la Constitución Política de 1991, toda vez que, además de contemplar en su artículo 79, el goce del ambiente sano como derecho colectivo<sup>38</sup>, incluyó un compendio normativo para reglar el actuar del Estado y de los particulares respecto de la protección, explotación, uso y aprovechamiento de los recursos naturales.

Se ha podido establecer que existen al menos 34 disposiciones que regulan la relación de los habitantes del territorio con la naturaleza y su entorno, en procura de proteger el medio ambiente, lo que ha llevado a

---

<sup>37</sup> Decreto 2811 de 1974. Artículo 7°. "(...) toda persona tiene derecho a disfrutar de un ambiente sano (...)"

<sup>38</sup> Constitución Política de Colombia. Artículo 79. "Todas las personas tienen derecho a gozar de un ambiente sano (...)."

Expediente No. 25000-23-27-000-2001-0479-01  
 Acumulados Nos. 2000-0428, 2001-0122, 2001-0343  
 Actor: GUSTAVO MOYA ÁNGEL Y OTROS  
 Acción Popular

calificar a la Carta de 1991 como una Constitución Ecológica<sup>39</sup>.

A partir de ahí, el desarrollo del concepto se ha dado con el avance de los criterios jurisprudenciales sobre el particular, otorgándole al derecho al ambiente sano su verdadera dimensión y estableciendo su núcleo esencial.

Para ello, en primer lugar, resulta perentorio precisar qué debe entenderse por medio ambiente, toda vez que, el

---

<sup>39</sup>La Corte Constitucional ha desarrollado el concepto de Constitución Ecológica, término que se adoptó desde la sentencia T-411 de 1992, las siguientes disposiciones sobre el tema: "**Preámbulo** (vida), **2º** (fines esenciales del Estado: proteger la vida), **8º** (obligación de proteger las riquezas culturales y naturales de la Nación), **11** (inviolabilidad del derecho a la vida), **44** (derechos fundamentales de los niños), **49** (atención de la salud y del saneamiento ambiental), **58** (función ecológica de la propiedad), **66** (créditos agropecuarios por calamidad ambiental), **67** (la educación para la protección del ambiente), **78** (regulación de la producción y comercialización de bienes y servicios), **79** (derecho a un ambiente sano y participación en las decisiones ambientales), **80** (planificación del manejo y aprovechamiento de los recursos naturales), **81** (prohibición de armas químicas, biológicas y nucleares), **82** (deber de proteger los recursos culturales y naturales del país), **215** (emergencia por perturbación o amenaza del orden ecológico), **226** (internacionalización de las relaciones ecológicas), **268-7** (fiscalización de los recursos naturales y del ambiente), **277-4** (defensa del ambiente como función del Procurador), **282-5** (el Defensor del Pueblo y las acciones populares como mecanismo de protección del ambiente), **289** (programas de cooperación e integración en zonas fronterizas para la preservación del ambiente), **300-2** (Asambleas Departamentales y medio ambiente), **301** (gestión administrativa y fiscal de los departamentos atendiendo a recursos naturales y a circunstancias ecológicas), **310** (control de densidad en San Andrés y Providencia con el fin de preservar el ambiente y los recursos naturales), **313-9** (Concejos Municipales y patrimonio ecológico), **317** y **294** (contribución de valorización para conservación del ambiente y los recursos naturales), **330-5** (Concejos de los territorios indígenas y preservación de los recursos naturales), **331** (Corporación del Río Grande de la Magdalena y preservación del ambiente), **332** (dominio del Estado sobre el subsuelo y los recursos naturales no renovables), **333** (limitaciones a la libertad económica por razones del medio ambiente), **334** (intervención estatal para la preservación de los recursos naturales y de un ambiente sano), **339** (política ambiental en el plan nacional de desarrollo), **340** (representación de los sectores ecológicos en el Consejo Nacional de Planeación), **366** (solución de necesidades del saneamiento ambiental y de agua potable como finalidad del Estado)".

Expediente No. 25000-23-27-000-2001-0479-01  
Acumulados Nos. 2000-0428, 2001-0122, 2001-0343  
Actor: GUSTAVO MOYA ÁNGEL Y OTROS  
Acción Popular

reconocimiento como derecho tiene por efecto definitorio en los componentes del bien jurídico a proteger y los procedimientos que garantizan la gestión colectiva del patrimonio medio ambiental.

Como anota el autor Michel Prieur, el medio ambiente es una palabra que en principio puede causar sentimientos enfrentados. Señala el mencionado autor que *"según el contexto en que sea utilizado, será calificado como una idea de moda, un lujo para países ricos, un mito, un tema controversial salido de las ideas hippies de los sesenta y ocho, un regreso a la edad media, el nuevo terror del siglo relacionado con las catástrofes ecológicas, las flores y los pequeños pájaros, un grito de alarma de los economistas y filósofos sobre el límite del crecimiento, el anuncio de la desaparición de los recursos naturales, un nuevo mercado antipolución, o una utopía contradictoria con el mito del crecimiento"*<sup>40</sup>.

No obstante, el medio ambiente ha conducido en la actualidad a una reflexión interdisciplinaria que lo concibe como el **conjunto de factores naturales o artificiales que influyen sobre el contexto en el cual el hombre vive**. Esta acepción que aparece en principio como muy general, merece ser precisada y complementada con otras que son vecinas, como ecología, naturaleza, calidad de vida, contexto de vida, y patrimonio.

Es así como, los aportes de cada ciencia han sido valiosos para construir el concepto de medio ambiente,

---

<sup>40</sup> PRIEUR, Michel. Droit de l'environnement. 6ª Edición, Editorial. Dalloz. 2011.

Expediente No. 25000-23-27-000-2001-0479-01  
Acumulados Nos. 2000-0428, 2001-0122, 2001-0343  
Actor: GUSTAVO MOYA ÁNGEL Y OTROS  
Acción Popular

ese es el caso de la ecología, ciencia transdisciplinaria que, aunque se limita a estudiar únicamente las relaciones de los seres vivos (los vegetales y los animales con exclusión del hombre) en su contexto, ha alimentado la noción de medio ambiente, que si considera al hombre en su contexto artificial y natural, con toda una serie de palabras y definiciones científicas que sirven para determinar el marco jurídico del derecho ambiental.

Solo para hacer referencia a algunas, se han acogido términos como i) nicho ecológico o "*hábitat*" entendido como el medio donde vive una especie que es definida por su comportamiento alimentario, reproductor, y territorial; ii) biotopo, que es el soporte inorgánico de una especie, y comprenderá (el suelo, el agua, etc.); iii) biocenosis que es un conjunto de especies animales y vegetales que coexisten y que tienen entre ellas relaciones con un biotipo determinado; iv) ecosistema que es una unidad topográfica, cualquiera que sea la superficie, colonizada por un cierto número de seres vivos, que tienen entre ellos y en su relación con el biotopo en el cual ellos viven, nexos generalmente bien definidos. No es otra la explicación de nociones jurídicas como "*equilibrio biológico*" o "*equilibrio ecológico*".

Por su parte, del concepto de "*naturaleza*" entendida en su globalidad, es decir todo aquello que no ha sido objeto en forma directa de una intervención humana se determinan componentes jurídicos del derecho al medio ambiente, toda vez que, desde el punto de vista de las

Expediente No. 25000-23-27-000-2001-0479-01  
Acumulados Nos. 2000-0428, 2001-0122, 2001-0343  
Actor: GUSTAVO MOYA ÁNGEL Y OTROS  
Acción Popular

decisiones judiciales, a juicio de algunos autores, todo lo que es natural debería de ser respetado y preservado en su estado presente o en su estado anterior si una restauración se hace posible o es conveniente; principio que traería como efecto jurídico inmediato que la carga de la prueba en caso de atentado contra el medio ambiente (naturaleza) debería ser siempre soportada por aquel que ha producido el daño.

De otro lado, también aporta a la noción de medio ambiente el principio de "*calidad de vida*", el cual refiere a una búsqueda de lo cualitativo, por oposición a la decepción que se ha tenido contra lo cuantitativo (nivel de vida) y, destacar así, que el medio ambiente concierne no solamente a la naturaleza sino también al hombre en sus relaciones sociales, de trabajo y recreativas. Como señala el profesor Prieur<sup>41</sup>, es la herencia de Marcuse y de Ilich, la ventana sociológica del medio ambiente dirigida a una sociedad de convivencia (*el manejo del tiempo, las relaciones colectivas en las ciudades, las diversiones, los deportes, el turismo han ido invadiendo lo que anteriormente solo era ecología*).

También ha hecho su aporte el criterio de "*marco de vida*", que no obstante encontrarse aún más alejado de la noción original de ecología, resulta siendo, en realidad, un sinónimo de medio ambiente en su especie arquitectónica y urbanística. El concepto es más familiar para los técnicos y urbanistas que para los geógrafos y biólogos, comprende el territorio del hombre-individuo tanto como **contexto físico** (*donde podrían incluirse la*

---

<sup>41</sup> Ibídem.

Expediente No. 25000-23-27-000-2001-0479-01  
Acumulados Nos. 2000-0428, 2001-0122, 2001-0343  
Actor: GUSTAVO MOYA ÁNGEL Y OTROS  
Acción Popular

*naturaleza y los espacios verdes artificiales o parques contruidos por el hombre)* y el **contexto social**. En relación a este último aspecto, bien decía B. de Jouvenel *"si pasamos de la protección de la naturaleza al marco de vida estamos pasando de lo macro del medio ambiente que es el de la especie humana, a lo micro del medio ambiente que es el de los grupos de familias"*<sup>42</sup>.

De la misma manera, la expresión "*patrimonio*" introduce un elemento moral y jurídicamente esencial en la concepción de lo que debe entenderse como medio ambiente. En su acepción restringida se podría temer que se asimile a la propiedad y a la rentabilidad. De hecho, se trata por el contrario de superar la propiedad, identificando los elementos del medio ambiente que deben observarse si se pretende su conservación y la gestión de un buen padre de familia. De esta manera la noción de patrimonio haría relación a la idea de herencia legado por las generaciones que nos antecedieron, y que nosotros debemos transmitir en forma intacta a las generaciones que nos sobrevivirán. Los bienes y los espacios que van a ser calificados de "*patrimonio*" por el derecho del medio ambiente van a ser objeto de una atención muy particular no solamente de parte de su propietario jurídico, si el existe, sino también y sobre todo de la colectividad en su plenitud; razón por la cual debe hacerse referencia al patrimonio natural, compuesto por el biológico, ecológico y cultural; y al construido, en sus componentes arquitectónico, urbano y rural.

---

<sup>42</sup> JOUVENEL, Bertrand. La Civilización de la Potencia: de la economía política a la ecología política. 1976.

Expediente No. 25000-23-27-000-2001-0479-01  
Acumulados Nos. 2000-0428, 2001-0122, 2001-0343  
Actor: GUSTAVO MOYA ÁNGEL Y OTROS  
Acción Popular

De lo expuesto, se acoge el concepto según el cual el medio ambiente, en su connotación como derecho se refiere a las interacciones y relaciones de los seres vivientes (incluido el hombre) entre ellos, y con su entorno.

Así, se ha entendido y desarrollado la noción de medio ambiente como todo lo que rodea a los seres vivos y comprende elementos biofísicos, los recursos naturales como el suelo, el agua, la atmósfera, la flora, la fauna, etc.; y los componentes sociales. Las distintas normativas buscan establecer la correcta interrelación de los distintos elementos en aras de salvaguardarlo.

En ese orden de ideas, resulta lógico que dicho derecho cuente con varias dimensiones, toda vez que ostenta la calidad de i) **derecho fundamental** (por encontrarse estrechamente ligado con los derechos fundamentales a la vida y a la salud); ii) de **derecho-deber** (todos son titulares del derecho a gozar de un ambiente sano pero, además, tienen la obligación correlativa de protegerlo); iii) de **objetivo social** (conservación de las condiciones del medio ambiente para garantizar la supervivencia de las generaciones presentes y futuras) y, iv) de **deber del Estado** (conservación del medio ambiente, eficiente manejo de los recursos, educación ambiental, fomento del desarrollo sostenible, e imposición las sanciones a que haya lugar).

Es así como, en relación con la primera de las dimensiones reconocidas al derecho al ambiente sano, como derecho fundamental por su inescindible relación con los

Expediente No. 25000-23-27-000-2001-0479-01  
 Acumulados Nos. 2000-0428, 2001-0122, 2001-0343  
 Actor: GUSTAVO MOYA ÁNGEL Y OTROS  
 Acción Popular

derechos a la vida y a la salud, la Corte Constitucional determinó<sup>43</sup>:

"El derecho al medio ambiente no se puede desligar del derecho a la vida y a la salud de las personas. De hecho, los factores perturbadores del medio ambiente causan daños irreparables en los seres humanos y si ello es así habrá que decirse que el medio ambiente es un derecho fundamental para la existencia de la humanidad. A esta conclusión se ha llegado cuando esta Corte ha evaluado la incidencia del medio ambiente en la vida de los hombres y por ello en sentencias anteriores de tutelas, se ha afirmado que el derecho al medio ambiente es un derecho fundamental" (Negrilla y subrayado fuera del texto)

Por su parte, respecto de la connotación de derecho deber, se ha precisado<sup>44</sup>:

"Bajo ese entendido, uno de los principios fundamentales del nuevo régimen constitucional es la obligación estatal e individual de proteger las riquezas culturales y naturales de la Nación, en virtud de la cual, la Constitución recoge en la forma de derechos colectivos y obligaciones específicas las pautas generales que rigen la relación entre el ser humano y el ecosistema. Estas disposiciones establecen, por ejemplo, (i) el derecho colectivo a gozar de un ambiente sano, (ii) la obligación estatal y de todas las personas de proteger la diversidad e integridad del ambiente, (iii) la obligación del Estado de prevenir y controlar los factores de deterioro y garantizar un desarrollo sostenible y (iv) la función ecológica de la propiedad. (...)

De ahí que todos los habitantes del territorio colombiano tienen derecho a gozar un entorno o

<sup>43</sup> Corte Constitucional. Sentencia C-671 de 2001. M.P.: Jaime Araujo Rentería.

<sup>44</sup> Corte Constitucional. Sentencia T-1085 de 2012. M.P.: Jorge Ignacio Pretelt Chaljub.

Expediente No. 25000-23-27-000-2001-0479-01  
 Acumulados Nos. 2000-0428, 2001-0122, 2001-0343  
 Actor: GUSTAVO MOYA ÁNGEL Y OTROS  
 Acción Popular

hábitat sano y el deber de velar por la conservación de éste".

Respecto de la característica de objetivo social del derecho al ambiente sano, en sentencia C-671 de junio 21 de 2001 se precisó que:

*"La protección del medio ambiente ha adquirido en nuestra Constitución un carácter de objetivo social, que al estar relacionado adicionalmente con la prestación eficiente de los servicios públicos, la salubridad y los recursos naturales como garantía de la supervivencia de las generaciones presentes y futuras, ha sido entendido como una prioridad dentro de los fines del Estado y como un reconocimiento al deber de mejorar la calidad de vida de los ciudadanos. Artículo 366 C.P. (...)*

*La defensa del medio ambiente constituye un objetivo de principio dentro de la actual estructura de nuestro Estado Social de Derecho. En cuanto hace parte del entorno vital del hombre, indispensable para su supervivencia y la de las generaciones futuras, el medio ambiente se encuentra al amparo de lo que la jurisprudencia ha denominado 'Constitución ecológica', conformada por el conjunto de disposiciones superiores que fijan los presupuestos a partir de los cuales deben regularse las relaciones de la comunidad con la naturaleza y que, en gran medida, propugnan por su conservación y protección".*

De otro lado, en lo relativo al derecho al ambiente sano como deber del Estado, la jurisprudencia constitucional<sup>45</sup> ha sostenido que:

*"Mientras por una parte se reconoce el medio ambiente sano como un derecho del cual son titulares todas las personas -quienes a su vez*

---

<sup>45</sup>Sobre el particular, ver sentencias: T-1085 de 2012, C-431 de 2000.

Expediente No. 25000-23-27-000-2001-0479-01  
Acumulados Nos. 2000-0428, 2001-0122, 2001-0343  
Actor: GUSTAVO MOYA ÁNGEL Y OTROS  
Acción Popular

*están legitimadas para participar en las decisiones que puedan afectarlo y deben colaborar en su conservación-, por la otra se le imponen al Estado los deberes correlativos de: 1) proteger su diversidad e integridad, 2) salvaguardar las riquezas naturales de la Nación, 3) conservar las áreas de especial importancia ecológica, 4) fomentar la educación ambiental, 5) planificar el manejo y aprovechamiento de los recursos naturales para así garantizar su desarrollo sostenible, su conservación, restauración o sustitución, 6) prevenir y controlar los factores de deterioro ambiental, 7) imponer las sanciones legales y exigir la reparación de los daños causados al ambiente y 8) cooperar con otras naciones en la protección de los ecosistemas situados en las zonas de frontera.”<sup>46</sup>*

En igual sentido, la Corte Constitucional ha expresado que:

*"(...) Igualmente, el Estado debe prevenir y controlar los factores de deterioro ambiental, imponer sanciones legales por conductas lesivas del ambiente y exigir la reparación de los daños causados."*

Así las cosas, el derecho al ambiente sano, de acuerdo con el desarrollo jurisprudencial citado, es un derecho de rango constitucional, de carácter fundamental, del cual somos todos titulares y del que, además, tenemos la obligación de contribuir para su preservación, *"mediante la participación en la toma de decisiones ambientales y el ejercicio de acciones públicas y otras garantías individuales, entre otros."*<sup>47</sup>

---

<sup>46</sup>Corte Constitucional. Sentencia C-431 de 2000. M.P. Vladimiro Naranjo Mesa.

<sup>47</sup> Corte Constitucional. Sentencia T-1085 de 2012. M.P.: Jorge Ignacio Pretelt Chaljub.

Expediente No. 25000-23-27-000-2001-0479-01  
Acumulados Nos. 2000-0428, 2001-0122, 2001-0343  
Actor: GUSTAVO MOYA ÁNGEL Y OTROS  
Acción Popular

Del mismo modo, corresponde al Estado, *"la obligación de asegurar las condiciones que permitan a las personas gozar del derecho a un medio ambiente sano"*, para lo cual deberá ejercer las funciones de control y vigilancia de las actividades económicas que puedan afectarlo pero permitiendo su desarrollo sostenible, y garantizando, además, el correcto manejo y aprovechamiento de los recursos naturales.

#### **I.2.2. EL AGUA COMO PATRIMONIO DE LA NACIÓN, BIEN DE USO PÚBLICO, DERECHO FUNDAMENTAL, HUMANO Y COLECTIVO**

Del latín *agua*, el agua es la sustancia más importante de la naturaleza y uno de los principales componentes del medio en que vivimos y de la vida en general. Se trata de un compuesto de características únicas, determinante en los procesos físicos, biológicos y químicos del medio natural. De las anteriores, el químico es sobresaliente, dado que la mayoría de dichos procesos se realizan con sustancias disueltas en ella.

La importancia del agua es notoria, interviene en la composición de los seres vivos, es indispensable para la vida humana, por lo que su protección y conservación resulta preponderante e imperiosa, es así como desde el punto de vista jurídico cuenta con una regulación excepcional y de trascendencia.

La Constitución Política consagra como deber fundamental del Estado no solo el de velar por la existencia de todos los ciudadanos y su vida en condiciones de dignas, sino

Expediente No. 25000-23-27-000-2001-0479-01  
Acumulados Nos. 2000-0428, 2001-0122, 2001-0343  
Actor: GUSTAVO MOYA ÁNGEL Y OTROS  
Acción Popular

también por la obligación de asegurar la utilización racional de los recursos naturales, con el fin de mejorar la calidad de vida de todos y asegurar su subsistencia futura.

Es así como el constituyente protege el ambiente y, en especial, el agua como fuente de vida y como condicionante para el disfrute de otros derechos fundamentales, tales como los derechos a la salud y a la alimentación.

El artículo 8° de la Constitución establece que es obligación del Estado y de todas las personas proteger las riquezas culturales y naturales de la Nación, entre las que se encuentra el agua.

El artículo 79 dispone que todas las personas tienen derecho a gozar de un ambiente sano, y que es deber del Estado proteger la diversidad e integridad del ambiente, conservar las áreas de especial importancia ecológica y fomentar la educación para el logro de estos fines.

De igual manera, el artículo 80 prescribe el deber de planificación del Estado, al señalar que el manejo y aprovechamiento de los recursos se debe garantizar en pro de su desarrollo sostenible, su conservación, restauración o sustitución; y que se deben prevenir y controlar los factores de deterioro ambiental, imponer las sanciones legales y exigir la reparación de los daños causados.

Asimismo, el artículo 334 obliga al Estado a intervenir, por mandato de la ley, en la explotación de los recursos

Expediente No. 25000-23-27-000-2001-0479-01  
Acumulados Nos. 2000-0428, 2001-0122, 2001-0343  
Actor: GUSTAVO MOYA ÁNGEL Y OTROS  
Acción Popular

naturales, en el uso del suelo, en la producción, distribución, utilización y consumo de los bienes, para el mejoramiento de la calidad de vida de los habitantes, la distribución equitativa de las oportunidades y los beneficios del desarrollo y la preservación de un ambiente sano.

El artículo 366 consagra como objetivos fundamentales de la actividad estatal, la solución de las necesidades insatisfechas de salud, de educación, de saneamiento ambiental y de agua potable, verbigracia el Acto Legislativo 4 de 2007, establece que los recursos del Sistema General de Participaciones de los Departamentos, Distritos y municipios deberán destinarse a la financiación de los servicios a su cargo, dando prioridad al servicio de salud y servicios domiciliarios de agua potable y saneamiento básico, entre otros.

En especial, la Carta Fundamental consagra la función social y ecológica de la propiedad, establece límites a la libertad económica, cuando así lo exija la protección del ambiente (Artículos 58 y 333).

Por su parte, el Código Civil se refiere al agua como un bien de uso público<sup>48</sup> tal y como lo consagró la propia Constitución Política de 1991 en sus artículos 63 y 332 al disponer:

---

<sup>48</sup>Artículo 677. Propiedad sobre las aguas. "Los ríos y todas las aguas que corren por cauces naturales son bienes de la Unión, de uso público en los respectivos territorios. Exceptúense las vertientes que nacen y mueren dentro de una misma heredad: su propiedad, uso y goce pertenecen a los dueños de las riberas, y pasan con estos a los herederos y demás sucesores de los dueños".

Expediente No. 25000-23-27-000-2001-0479-01  
 Acumulados Nos. 2000-0428, 2001-0122, 2001-0343  
 Actor: GUSTAVO MOYA ÁNGEL Y OTROS  
 Acción Popular

*Artículo 63: "Los bienes de uso público, los parques naturales, las tierras comunales de grupos étnicos, las tierras de resguardo, el patrimonio arqueológico de la Nación y los demás bienes que determine la ley, son inalienables, imprescriptibles e inembargables..."*

*Artículo 332. "El Estado es propietario del subsuelo y de los recursos naturales no renovables, sin perjuicio de los derechos adquiridos y perfeccionados con arreglo a las leyes preexistentes".*

Según el Decreto 2811 de 1974<sup>4950</sup>, el ambiente es patrimonio común y los recursos naturales renovables pertenecen a la Nación, las aguas - el álveo o cauce natural de las corrientes, el lecho de los depósitos naturales de agua, las playas marítimas, fluviales y lacustres, una faja paralela a la línea de mareas máximas o a la del cauce permanente de ríos y lagos, hasta de treinta metros de ancho, las áreas ocupadas por los nevados y los cauces de los glaciares, los estratos o depósitos de las aguas subterráneas - son de dominio público, inalienables e imprescriptibles.

En los términos del Decreto 1541 de 1978<sup>51</sup> son aguas de uso público los ríos y todas las aguas que corren por cauces naturales de modo permanente o no, las aguas que

---

<sup>49</sup> Código Nacional de Recursos Naturales Renovables y de Protección al Medio Ambiente (Artículos 1º, 42, 80 y 83).

<sup>50</sup> El artículo 77 establece como aguas no marítimas las meteóricas, es decir las que están en la atmósfera; las provenientes de lluvia natural o artificial; las corrientes superficiales que vayan por cauces naturales o artificiales; las de los lagos, ciénagas, lagunas y embalses de formación natural o artificial; las edáficas; las subterráneas; las subálveas; las de los nevados y glaciares; las ya utilizadas servidas o negras. El artículo 78 ibídem señala que con excepción de las meteóricas y de las subterráneas, las demás se consideran aguas superficiales.

<sup>51</sup> Reglamentario del Decreto 2811 de 1974 (Artículos 2º y 5º).

Expediente No. 25000-23-27-000-2001-0479-01  
Acumulados Nos. 2000-0428, 2001-0122, 2001-0343  
Actor: GUSTAVO MOYA ÁNGEL Y OTROS  
Acción Popular

corren por cauces artificiales que hayan sido derivadas de un cauce natural, los lagos, lagunas, ciénagas y pantanos, las aguas que están en la atmósfera, las corrientes y depósitos de aguas subterráneas; las aguas lluvias; la preservación y manejo de las aguas es de utilidad pública e interés social.

En el ámbito internacional, en 1968, el Consejo de Europa aprobó la *"Carta del Agua"*, en donde se afirma que este es un elemento de primera necesidad, tanto para el hombre, como para los animales y las plantas: *"sin agua no hay vida posible"*<sup>52</sup>.

La Declaración de Estocolmo de 1972, establece un vínculo entre derechos fundamentales y protección ambiental, al señalar que *"el hombre tiene el derecho fundamental a la libertad, la igualdad y adecuadas condiciones de vida, en un medio ambiente de una calidad que permita una vida de dignidad y bienestar"*. La Conferencia Mundial sobre Medio Ambiente y Desarrollo, celebrada en Río de Janeiro del 3 al 14 de junio de 1992, reafirmó la Declaración de la Conferencia de las Naciones Unidas sobre el medio Humano, aprobada en Estocolmo el 16 de junio de 1972, y el cual constituye uno de los principales instrumentos ambientales del derecho internacional al reiterar la necesidad de tomar un papel activo en defensa del medio ambiente. En 1999, la Asamblea General de las Naciones Unidas reconoce<sup>53</sup> el derecho al agua como un derecho

---

<sup>52</sup> Consejo de Estado. Sala de Consulta y Servicio Civil. Concepto del 15 de diciembre de 2005. Rad.: 2005 - 1689. Consejero Ponente: Dr. Flavio Augusto Rodríguez.

<sup>53</sup> Asamblea General de las Naciones Unidas. 1999. *"El derecho al agua segura es un derecho fundamental del hombre."*

Expediente No. 25000-23-27-000-2001-0479-01  
 Acumulados Nos. 2000-0428, 2001-0122, 2001-0343  
 Actor: GUSTAVO MOYA ÁNGEL Y OTROS  
 Acción Popular

fundamental, que comprende el acceso al agua potable para los usos domésticos esenciales y el acceso a instalaciones sanitarias adecuadas sin obstáculos físicos o económicos<sup>54</sup>.

De otro lado, e igualmente a nivel supranacional, se encuentran los artículos 11<sup>55</sup> y 12<sup>56</sup> del Pacto Internacional de Derechos Económicos Sociales y Culturales, los cuales hacen alusión a título enunciativo, no taxativo, de los derechos que emanan del derecho de toda persona a un nivel de vida adecuado para sí y su familia y al disfrute del más alto nivel posible de salud física, respectivamente.

---

<sup>54</sup> Ibídem.

<sup>55</sup> Artículo 11. 1. Los Estados Partes en el presente Pacto reconocen el derecho de toda persona a un nivel de vida adecuado para sí y su familia, incluso alimentación, vestido y vivienda adecuados, y a una mejora continua de las condiciones de existencia. Los Estados Partes tomarán medidas apropiadas para asegurar la efectividad de este derecho, reconociendo a este efecto la importancia esencial de la cooperación internacional fundada en el libre consentimiento. 2. Los Estados Partes en el presente Pacto, reconociendo el derecho fundamental de toda persona a estar protegida contra el hambre, adoptarán, individualmente y mediante la cooperación internacional, las medidas, incluidos programas concretos que se necesitan para: a) Mejorar los métodos de producción, conservación y distribución de alimentos mediante la plena utilización de los conocimientos técnicos y científicos, la divulgación de principios sobre nutrición y el perfeccionamiento o la reforma de los regímenes agrarios de modo que se logren la explotación y la utilización más eficaces de las riquezas naturales; b) Asegurar una distribución equitativa de los alimentos mundiales en relación con las necesidades, teniendo en cuenta los problemas que se plantean tanto a los países que importan productos alimenticios como a los que los exportan.

<sup>56</sup> Artículo 12. 1. Los Estados Partes en el presente Pacto reconocen el derecho de toda persona al disfrute del más alto nivel posible de salud física y mental. 2. Entre las medidas que deberán adoptar los Estados Partes en el Pacto a fin de asegurar la plena efectividad de este derecho, figurarán las necesarias para: a) La reducción de la mortinatalidad y de la mortalidad infantil, y el sano desarrollo de los niños; b) El mejoramiento en todos sus aspectos de la higiene del trabajo y del medio ambiente; c) La prevención y el tratamiento de las enfermedades epidémicas, endémicas, profesionales y de otra índole, y la lucha contra ellas; d) La creación de condiciones que aseguren a todos asistencia médica y servicios médicos en caso de enfermedad.

Expediente No. 25000-23-27-000-2001-0479-01  
 Acumulados Nos. 2000-0428, 2001-0122, 2001-0343  
 Actor: GUSTAVO MOYA ÁNGEL Y OTROS  
 Acción Popular

El Comité de Derechos Económicos, Sociales y Culturales de las Naciones Unidas incluye el agua como condición fundamental para la supervivencia humana<sup>57</sup>.

La Corte Constitucional, citando al referido Comité en sentencia T-270/07, señaló que en el año 2002, en el 29º período de sesiones en Ginebra, se presentó la observación número 15, en la cual se expresaron los fundamentos jurídicos sobre el derecho al agua, en los siguientes términos:

*"El agua es un recurso natural limitado y un bien público fundamental para la vida y la salud. El derecho humano al agua es indispensable para vivir dignamente y es condición previa para la realización de otros derechos humanos.*

*".....*

*"El derecho humano al agua es el derecho de todos a disponer de agua suficiente, salubre, aceptable, accesible y asequible para el uso personal y doméstico. Un abastecimiento adecuado de agua salubre es necesario para evitar la muerte por deshidratación, para reducir el riesgo de las enfermedades relacionadas con el agua y para satisfacer las necesidades de consumo y cocina y las necesidades de higiene personal y doméstica*

*".....*

*El agua es necesaria para diversas finalidades, aparte de los usos personales y domésticos, y para el ejercicio de muchos de los derechos reconocidos en el Pacto. Por ejemplo, el agua es necesaria para producir alimentos (el derecho a una alimentación adecuada) y para asegurar la*

---

<sup>57</sup> Ver entre otras la sentencia de la Corte Constitucional T-418 de 2010, Magistrada Ponente: Dra. María Victoria Calle Correa.

Expediente No. 25000-23-27-000-2001-0479-01  
 Acumulados Nos. 2000-0428, 2001-0122, 2001-0343  
 Actor: GUSTAVO MOYA ÁNGEL Y OTROS  
 Acción Popular

*higiene ambiental (el derecho a la salud). El agua es fundamental para procurarse medios de subsistencia (el derecho a ganarse la vida mediante un trabajo) y para disfrutar de determinadas prácticas culturales (el derecho a participar en la vida cultural). Sin embargo, en la asignación del agua debe concederse prioridad al derecho de utilizarla para fines personales y domésticos. También debe darse prioridad a los recursos hídricos necesarios para evitar el hambre y las enfermedades, así como para cumplir las obligaciones fundamentales que entraña cada uno de los derechos del Pacto".*

Igualmente, la Convención para la eliminación de todas las formas de discriminación contra la mujer<sup>58</sup> y la Convención sobre los derechos de los niños<sup>59</sup>, se refieren a dicho derecho.

Siguiendo a la Corte Constitucional "como derecho fundamental, el derecho al agua tiene tanto un alcance subjetivo como objetivo. Como derecho subjetivo, la tutela del derecho al agua puede ser reclamada ante las instancias judiciales en escenarios de vulneración tanto por parte del Estado como por parte de particulares, especialmente cuando se trata de agua para consumo

---

<sup>58</sup> Artículo 14. Los Estados Partes adoptarán todas las medidas apropiadas para eliminar la discriminación contra la mujer en las zonas rurales a fin de asegurar, en condiciones de igualdad entre hombres y mujeres, su participación en el desarrollo rural y en sus beneficios, y en particular le asegurarán el derecho a: (...) h. Gozar de condiciones de vida adecuadas, particularmente en las esferas de la vivienda, los servicios sanitarios, la electricidad y el abastecimiento de agua, el transporte y las comunicaciones.

<sup>59</sup> Artículo 24, Numeral 2°. Los Estados Partes asegurarán la plena aplicación de este derecho y, en particular, adoptarán las medidas apropiadas para: (...) b) Asegurar la prestación de la asistencia médica y la atención sanitaria que sean necesarias a todos los niños, haciendo hincapié en el desarrollo de la atención primaria de salud; c) Combatir las enfermedades y la malnutrición en el marco de la atención primaria de la salud mediante, entre otras cosas, la aplicación de la tecnología disponible y el suministro de alimentos nutritivos adecuados y agua potable salubre, teniendo en cuenta los peligros y riesgos de contaminación del medio ambiente;

Expediente No. 25000-23-27-000-2001-0479-01  
Acumulados Nos. 2000-0428, 2001-0122, 2001-0343  
Actor: GUSTAVO MOYA ÁNGEL Y OTROS  
Acción Popular

*humano. El reconocimiento de su naturaleza subjetiva ha dado lugar, por ejemplo, al desarrollo de una línea jurisprudencial amplia de protección por medio de la acción de tutela<sup>60</sup>. La dimensión objetiva de los derechos fundamentales hace referencia a su poder vinculante frente a todos los poderes públicos. En efecto, los derechos fundamentales constituyen un sistema de valores positivizado por la Constitución que guía las decisiones de todas las autoridades, incluido el Legislador<sup>61</sup>.*

Resulta importante recordar que la titularidad del derecho al agua como derecho subjetivo se encuentra en cabeza no sólo de las personas individualmente consideradas, sino también de la comunidad. En otras palabras, dicho derecho cuenta con una doble naturaleza (individual y colectiva).

En relación con su naturaleza colectiva, la Corte Constitucional anotó que *"hay dimensiones del derecho que generan obligaciones de respeto, de protección y de garantía, de las cuales no son titulares las personas individualmente, sino colectivamente. Las protecciones de las fuentes hídricas de las cuales puede depender eventualmente el consumo de agua de las futuras generaciones, hace parte, sin duda, de los ámbitos de protección del derecho al agua, pero no se trata de un derecho individual"*<sup>62</sup>.

---

<sup>60</sup> Ver entre otras la Sentencia de la Corte Constitucional T-418 de 2010, Magistrada Ponente: Dra. María Victoria Calle Correa, en la cual se hace una relación de las decisiones proferidas por dicha Corporación Judicial respecto del amparo del derecho fundamental al agua.

<sup>61</sup> Corte Constitucional. Sentencia T-270/07. Magistrado Ponente: Dr. Jaime Araújo Rentería.

<sup>62</sup> Corte Constitucional. Sentencia T-418 de 2010. Magistrada Ponente: Dra. María Victoria Calle Correa.

Expediente No. 25000-23-27-000-2001-0479-01  
 Acumulados Nos. 2000-0428, 2001-0122, 2001-0343  
 Actor: GUSTAVO MOYA ÁNGEL Y OTROS  
 Acción Popular

Estas obligaciones serán entonces reclamables ya no a través de la acción de tutela, sino por medio de la acción popular.

La Ley 9ª de 1989, artículo 8º, señala que "*los elementos constitutivos del espacio público y el medio ambiente tendrán para su defensa la acción popular consagrada en el artículo 1005 del Código Civil*", ya en vigencia de la Ley 472 de 1998, artículo 4º, son derechos e intereses colectivos, entre otros, los relacionados con el goce de un ambiente sano y la existencia del equilibrio ecológico y el manejo y aprovechamiento racional de los recursos naturales para garantizar su desarrollo sostenible, su conservación.

### ***El agua como derecho humano***

Marie Cuq<sup>63</sup> destaca que en el interior de las Naciones Unidas se ha discutido la inclusión del derecho al agua como un derecho del hombre para darle la prioridad que normalmente se otorga a esos derechos.

Según la autora, el derecho internacional de los derechos del hombre aspira a expresar una ideología común a toda la humanidad, donde el primer principio es el de la igualdad de todos los hombres. Esta rama del derecho internacional se funda sobre una concepción ideológica del hombre con miras a reconocer un conjunto de derechos que son inherentes al hombre en razón de su calidad de ser humano. Así, los derechos del hombre tienen su

---

<sup>63</sup> Cuq Marie «*L'eau en droit international*» Bruselas. Éditions Larcier, 2013

Expediente No. 25000-23-27-000-2001-0479-01  
Acumulados Nos. 2000-0428, 2001-0122, 2001-0343  
Actor: GUSTAVO MOYA ÁNGEL Y OTROS  
Acción Popular

origen, no en la voluntad soberana de los Estados sino en la igual dignidad de cada persona, la concepción ideológica de los derechos humanos tiende a definir los derechos que son en si mismos universales, intemporales e inalienables. Su protección debe asegurarse independientemente de consideraciones de religión, sexo, opiniones políticas, países o cultura. Por ello se afirma una prioridad dada a la protección de los derechos humanos sobre cualquier otra consideración.

La concretización de esta concepción, añade Marie Cuq, se ilustra por la emergencia misma del derecho internacional de los derechos del hombre cuyo objetivo fue a la vez reconocer la existencia universal de tales derechos y a la vez afirmar el carácter objetivo de su puesta en marcha. La Declaración Universal de los derechos del Hombre es el primer texto internacional en afirmar explícitamente que los derechos del hombre no son creados por la voluntad de los Estados sino que se desprenden de la calidad de ser humano, de manera que ella lo que hace es reconocer su existencia.

Desprovista de un carácter obligatorio, esta declaración fue completada por la adopción de dos pactos internacionales, uno relativo a los derechos civiles y políticos y otro relacionado con los derechos económicos sociales y culturales. Al establecer los mecanismos jurídicos de protección de estos derechos, estos textos confirman su carácter declaratorio en cuanto a la existencia de los derechos humanos y la naturaleza objetiva de su protección. Los pactos internacionales no pueden ser concebidos como constituyentes, un conjunto de obligaciones interestatales.

Expediente No. 25000-23-27-000-2001-0479-01  
Acumulados Nos. 2000-0428, 2001-0122, 2001-0343  
Actor: GUSTAVO MOYA ÁNGEL Y OTROS  
Acción Popular

El respeto a los derechos del hombre es una obligación erga omnes, que protege un interés colectivo superior a los solos intereses individuales de los Estados.

De esta manera, señala la autora, el derecho internacional de los derechos humanos ha hecho evolucionar el derecho internacional, de un derecho interestatal, elaborado en función de los intereses de los Estados, hacia un derecho supraestatal encargado de asegurar en nombre de valores comunes y superiores a los Estados, la protección de intereses infra estatales. El Estado se ve constreñido a constatar la existencia de los derechos en beneficio de los individuos y asegurar su protección como una prioridad. Al buscar el reconocimiento del derecho al agua como un derecho del hombre, el Comité de Derechos Políticos, Económicos y Sociales de naciones unidas busca beneficiar este derecho de la concepción ideológica sobre la cual se fundan los derechos del hombre, y aplicarle el régimen jurídico y prioritario correspondiente. El acceso al agua tiene vocación de ser reconocido como un derecho que debe ser objeto de una protección universal y superior.

Añade que su desarrollo no puede darse en función de los intereses de los Estados. En materia de agua el interés de los Estados se traduce en el ejercicio de su soberanía territorial sobre el recurso acuático y el reconocimiento de un derecho al agua tendiente a establecer una prioridad a favor de la satisfacción de las necesidades humanas. El Estado tiene la obligación de asegurar a su población un acceso al agua antes de tomar en cuenta sus

Expediente No. 25000-23-27-000-2001-0479-01  
Acumulados Nos. 2000-0428, 2001-0122, 2001-0343  
Actor: GUSTAVO MOYA ÁNGEL Y OTROS  
Acción Popular

propios intereses en cuanto al uso del recurso. En esta perspectiva, Henry Smet, citado por la autora, estima que el agua es ante todo "un bien social", ella "amerita ser tratada de una manera diferente a los otros recursos naturales" y dejarla solamente en manos de las leyes del mercado traerá graves consecuencias sociales<sup>64</sup>. El Comité de Derechos Económicos, Sociales y Culturales, precisó al respecto, que "el agua deberá ser considerada como un bien social y cultural y no solamente como un bien económico". La búsqueda del reconocimiento de un derecho al agua pretende igualmente afirmar una prioridad de este derecho sobre la aplicación del derecho internacional económico, considerando que éste toma en cuenta lo relacionado con el agua de una manera insuficiente y la hace susceptible de sufrir atentados.

Precisa la autora que a través de la búsqueda del reconocimiento de un derecho humano al agua, se afirma también la necesidad de establecer una jerarquía entre los usos del agua para beneficio de las necesidades humanas esenciales. No obstante, la búsqueda de esta alternativa no ha finalizado, principalmente por dos razones. De una parte, el acceso al agua no ha sido objeto de un reconocimiento jurídico universal y de otra parte, porque, incluso si esta hipótesis estuviera cubierta, la adopción e implementación de ese derecho estaría sometido a las incertidumbres persistentes sobre su contenido.

---

<sup>64</sup> Smet Henri, "Le droit à l'eau". Académie de l'eau, CEDE-AESN, 2002, citado por Cuq Marie «L'eau en droit international» Bruselas. Éditions Larcier, 2013

Expediente No. 25000-23-27-000-2001-0479-01  
 Acumulados Nos. 2000-0428, 2001-0122, 2001-0343  
 Actor: GUSTAVO MOYA ÁNGEL Y OTROS  
 Acción Popular

Menciona igualmente Marie Cuq que pese a que no se ha reconocido como tal un derecho autónomo y universal al agua, la Comisión de Derechos Económicos, Sociales y Culturales de la ONU al interpretar la Pacto sobre Derechos Económicos, Sociales y Culturales, ha señalado que el reconocimiento de un derecho al agua se deriva de su vinculación con otros derechos, explícitamente reconocidos, como el derecho a un nivel de vida adecuado para sí y su familia, incluso alimentación, vestido y vivienda adecuados, y a una mejora continua de las condiciones de existencia, al tiempo que es componente fundamental del derecho a la vida, a la dignidad humana, del derecho a un ambiente sano y al acceso a los recursos naturales.

Cabe destacar aquí las principales directrices de la Observación No. 15 (2002)<sup>65</sup> del Comité de Derechos Económicos, Sociales y Culturales -CDESC- de Naciones Unidas sobre el derecho humano al agua, las cuales constituyen importantes orientaciones sobre la forma como los Estados parte deben cumplir los deberes que les corresponden para garantizar ese derecho.

Señala el CDESC que el agua es un recurso natural limitado y un bien público fundamental para la vida y la salud. El derecho humano al agua es indispensable para

---

<sup>65</sup>

Oficina Del Alto Comisionado de las Naciones Unidas para los derechos Humanos. Comité de Derechos Económicos, Sociales y Culturales Observación general N° 15 (2002) El derecho al agua (artículos 11 y 12 del Pacto Internacional de Derechos Económicos, Sociales y Culturales). Disponible en <http://www2.ohchr.org/spanish/bodies/cescr/>

Expediente No. 25000-23-27-000-2001-0479-01  
Acumulados Nos. 2000-0428, 2001-0122, 2001-0343  
Actor: GUSTAVO MOYA ÁNGEL Y OTROS  
Acción Popular

vivir dignamente y es condición previa para la realización de otros derechos humanos.

Define el derecho humano al agua como el derecho de todos a disponer de agua suficiente, salubre, aceptable, accesible y asequible para el uso personal y doméstico. Un abastecimiento adecuado de agua salubre es necesario para evitar la muerte por deshidratación, para reducir el riesgo de las enfermedades relacionadas con el agua y para satisfacer las necesidades de consumo y cocina y las necesidades de higiene personal y doméstica.

Precisa el Comité, que el derecho al agua se encuadra claramente en la categoría de las garantías indispensables para asegurar un nivel de vida adecuado, en particular porque es una de las condiciones fundamentales para la supervivencia. Además, el Comité ha reconocido anteriormente que el agua es un derecho humano amparado por el párrafo 1 del artículo 11 (véase la Observación general N° 6 (1995))<sup>66</sup>. El derecho al agua también está indisolublemente asociado al derecho al más alto nivel posible de salud (párr. 1 del art. 12)<sup>67</sup> y al derecho a una vivienda y una alimentación adecuadas (párr. 1 del art. 11)<sup>68</sup>. Este derecho también debe

---

<sup>66</sup> 2 Véanse los párrafos 5 y 32 de la Observación general N° 6 (1995) del Comité, relativa a los derechos económicos, sociales y culturales de las personas mayores.

<sup>67</sup> 3 Véase la Observación general N° 14 (2000) sobre el derecho al disfrute del más alto nivel posible de salud, párrafos 11, 12 a), b) y d), 15, 34, 36, 40, 43 y 51.

<sup>68</sup> 4 Véase el apartado b) del párrafo 8 de la Observación general N° 4 (1991). Véase también el informe del Relator Especial de la Comisión de Derechos Humanos sobre una vivienda adecuada como parte del derecho a un nivel de vida adecuado, el Sr. Miloon Kothari (E/CN.4/2002/59), presentado de conformidad con la resolución

**Expediente No. 25000-23-27-000-2001-0479-01**  
**Acumulados Nos. 2000-0428, 2001-0122, 2001-0343**  
**Actor: GUSTAVO MOYA ÁNGEL Y OTROS**  
**Acción Popular**

considerarse conjuntamente con otros derechos consagrados en la Carta Internacional de Derechos Humanos, entre los que ocupa un lugar primordial el derecho a la vida y a la dignidad humana.

Menciona el CDESC que derecho al agua ha sido reconocido en un gran número de documentos internacionales, tales como tratados, declaraciones y otras normas<sup>69</sup>. Por

---

2001/28 de la Comisión, de 20 de abril de 2001. En relación con el derecho a una alimentación adecuada, véase el informe del Relator Especial de la Comisión sobre el derecho a la alimentación, el Sr. Jean Ziegler (E/CN.4/2002/58), presentado de conformidad con la resolución 2001/25 de la Comisión, de 20 de abril de 2001.

<sup>69</sup> 5 Véanse el apartado h) del párrafo 2 del artículo 14 de la Convención sobre la eliminación de todas las formas de discriminación contra la mujer; el apartado c) del párrafo 2 del artículo 24 de la Convención sobre los Derechos del Niño; los artículos 20, 26, 29 y 46 del Convenio de Ginebra relativo al trato debido a los prisioneros de guerra, de 1949; los artículos 85, 89 y 127 del Convenio de Ginebra relativo a la protección debida a las personas civiles en tiempo de guerra, de 1949; los artículos 54 y 55 del Protocolo Adicional I, de 1977; los artículos 5 y 14 del Protocolo Adicional II, de 1977; y el preámbulo de la Declaración de Mar del Plata de la Conferencia de las Naciones Unidas sobre el Agua. Véanse también el párrafo 18.47 del Programa 21, en Informe de la Conferencia de las Naciones Unidas sobre el Medio Ambiente y el Desarrollo, Río de Janeiro, 3 a 14 de junio de 1992 (A/CONF.151/26/Rev.1 (Vol. I y Vol. I/Corr.1, Vol. II, Vol. III y Vol. III/Corr.1) (publicación de las Naciones Unidas, N° de venta: S.93.I.8), vol. I: resoluciones adoptadas por la Conferencia, resolución 1, anexo II; el Principio N° 3 de la Declaración de Dublín sobre el Agua y el Desarrollo Sostenible, Conferencia Internacional sobre el Agua y el Medio Ambiente (A/CONF.151/PC/112); el Principio N° 2 del Programa de Acción, en Informe de la Conferencia Internacional de las Naciones Unidas sobre la Población y el Desarrollo, El Cairo, 5 a 13 de septiembre de 1994 (publicación de las Naciones Unidas, N° de venta: S.95.XIII.18), cap. I, resolución 1, anexo; los párrafos 5 y 19 de la recomendación (2001) 14 del Comité de Ministros a los Estados Miembros sobre la Carta Europea de Recursos Hídricos; y la resolución 2002/6 de la Subcomisión sobre la Promoción y Protección de los Derechos Humanos acerca de la promoción del ejercicio del derecho a disponer de agua potable. Véase asimismo el informe sobre la relación entre el disfrute de los derechos económicos, sociales y culturales y la promoción del ejercicio del derecho a disponer de agua potable y servicios de saneamiento (E/CN.4/Sub.2/2002/10), presentado por el Relator Especial de la Subcomisión sobre la promoción del derecho al agua potable y a servicios de saneamiento, el Sr. El Hadji Guissé.

Expediente No. 25000-23-27-000-2001-0479-01  
Acumulados Nos. 2000-0428, 2001-0122, 2001-0343  
Actor: GUSTAVO MOYA ÁNGEL Y OTROS  
Acción Popular

ejemplo, en el párrafo 2 del artículo 14 de la Convención sobre la eliminación de todas las formas de discriminación contra la mujer se dispone que los Estados Partes asegurarán a las mujeres el derecho a "gozar de condiciones de vida adecuadas, particularmente en las esferas de [...] el abastecimiento de agua". En el párrafo 2 del artículo 24 de la Convención sobre los Derechos del Niño se exige a los Estados Partes que luchan contra las enfermedades y la malnutrición mediante "el suministro de alimentos nutritivos adecuados y agua potable salubre".

El agua es necesaria para diversas finalidades, aparte de los usos personales y Pacto. Por ejemplo, el agua es necesaria para producir alimentos (el derecho a una alimentación adecuada) y para asegurar la higiene ambiental (el derecho a la salud). El agua es fundamental para procurarse un medio de subsistencia (el derecho a ganarse la vida mediante un trabajo) y para disfrutar de determinadas prácticas culturales (el derecho a participar en la vida cultural). Sin embargo, en la asignación del agua debe concederse prioridad al derecho de utilizarla para fines personales y domésticos.

También debería darse prioridad a los recursos hídricos necesarios para evitar el hambre y las enfermedades, así como para cumplir las obligaciones fundamentales que entraña cada uno de los derechos del Pacto<sup>70</sup>.

---

<sup>70</sup> 6 Véase también Cumbre Mundial sobre el Desarrollo Sostenible, Plan de Aplicación de 2002, párrafo 25 c).

Expediente No. 25000-23-27-000-2001-0479-01  
Acumulados Nos. 2000-0428, 2001-0122, 2001-0343  
Actor: GUSTAVO MOYA ÁNGEL Y OTROS  
Acción Popular

El Comité señala la importancia de garantizar un acceso sostenible a los recursos hídricos con fines agrícolas para el ejercicio del derecho a una alimentación adecuada (véase la Observación general N° 12 (1997))<sup>71</sup>. Debe hacerse lo posible para asegurar que los agricultores desfavorecidos y marginados, en particular las mujeres, tengan un acceso equitativo al agua y a los sistemas de gestión del agua, incluidas las técnicas sostenibles de recogida del agua de lluvia y de irrigación.

Desde esta perspectiva, los elementos del derecho al agua deben ser *adecuados* a la dignidad, la vida y la salud humanas, de conformidad con el párrafo 1 del artículo 11 y el artículo 12 del Pacto de Derechos Económicos, Sociales y Culturales. Lo adecuado del agua no debe interpretarse de forma restrictiva, simplemente en relación con cantidades volumétricas y tecnologías. El agua debe tratarse como un bien social y cultural, y no fundamentalmente como un bien económico. El modo en que se ejerza el derecho al agua también debe ser sostenible, de manera que este derecho pueda ser ejercido por las generaciones actuales y futuras.<sup>72</sup>

---

<sup>71</sup> 7 Esto guarda relación tanto con la *disponibilidad* como con la *accesibilidad* del derecho a una alimentación adecuada (véase la Observación general N° 12 (1999), párrs. 12 y 13).

<sup>72</sup> 11 Para una definición de sostenibilidad, véanse los principios 1, 8, 9, 10, 12 y 15 de la Declaración sobre el medio ambiente y el desarrollo, en Informe de la Conferencia de las Naciones Unidas sobre el Medio Ambiente y el Desarrollo, Río de Janeiro, 3 a 14 de junio de 1992; y el Programa 21, en particular los principios 5.3, 7.27, 7.28, 7.35, 7.39, 7.41, 18.3, 18.8, 18.35, 18.40, 18.48, 18.50, 18.59 y 18.68.

Expediente No. 25000-23-27-000-2001-0479-01  
Acumulados Nos. 2000-0428, 2001-0122, 2001-0343  
Actor: GUSTAVO MOYA ÁNGEL Y OTROS  
Acción Popular

En tanto que lo que resulta adecuado para el ejercicio del derecho al agua puede variar en función de distintas condiciones, los siguientes factores se aplican en cualquier circunstancia: a) *La disponibilidad*; b) *La calidad*; c) *La accesibilidad*; i) *Accesibilidad física*; ii) *Accesibilidad económica*; iii) *No discriminación*; iv) *Acceso a la información*.

En cuanto a las obligaciones generales de los Estados Parte, la CDESC estableció que si bien el Pacto prevé la aplicación progresiva y reconoce los obstáculos que representan los limitados recursos disponibles, también impone a los Estados Partes diversas obligaciones de efecto inmediato. Los Estados Partes tienen obligaciones inmediatas por lo que respecta al derecho al agua, como la garantía de que ese derecho será ejercido sin discriminación alguna (párr. 2, art. 2) y la obligación de adoptar medidas (párr. 1, art. 2) en aras de la plena realización del párrafo 1 del artículo 11 y del artículo 12. Esas medidas deberán ser deliberadas y concretas e ir dirigidas a la plena realización del derecho al agua.

Igualmente, los Estados Partes tienen el deber constante y continuo en virtud del Pacto de avanzar con la mayor rapidez y efectividad posibles hacia la plena realización del derecho al agua. La realización de ese derecho debe ser viable y practicable, ya que todos los Estados Partes ejercen control sobre una amplia gama de recursos, incluidos el agua, la tecnología, los recursos financieros y la asistencia internacional, como ocurre con todos los demás derechos enunciados en el Pacto.

Expediente No. 25000-23-27-000-2001-0479-01  
Acumulados Nos. 2000-0428, 2001-0122, 2001-0343  
Actor: GUSTAVO MOYA ÁNGEL Y OTROS  
Acción Popular

Añade el Comité que existe una fuerte presunción de que la adopción de medidas regresivas con respecto al derecho al agua está prohibida por el Pacto<sup>19</sup>. Si se adoptan medidas deliberadamente regresivas, corresponde al Estado Parte demostrar que se han aplicado tras un examen sumamente exhaustivo de todas las alternativas posibles y que esas medidas están debidamente justificadas por referencia a la totalidad de los derechos enunciados en el Pacto en el contexto de la plena utilización del máximo de los recursos de que dispone el Estado Parte.

En cuanto a las obligaciones legales específicas señala el CDESC que al igual que todos los derechos humanos, el derecho al agua impone tres tipos de obligaciones a los Estados Partes, a saber: las obligaciones de *respetar*, *proteger* y *cumplir*.

En especial la obligación de *proteger* exige que los Estados Partes impidan a terceros que menoscaben en modo alguno el disfrute del derecho al agua. Por terceros se entiende particulares, grupos, empresas y otras entidades, así como quienes obren en su nombre. La obligación comprende, entre otras cosas, la adopción de las medidas legislativas o de otra índole que sean necesarias y efectivas para impedir, por ejemplo, que terceros denieguen el acceso al agua potable en condiciones de igualdad y contaminen o exploten en forma no equitativa los recursos de agua, con inclusión de las fuentes naturales, los pozos y otros sistemas de distribución de agua.

Expediente No. 25000-23-27-000-2001-0479-01  
Acumulados Nos. 2000-0428, 2001-0122, 2001-0343  
Actor: GUSTAVO MOYA ÁNGEL Y OTROS  
Acción Popular

La obligación de cumplir exige a su vez que los Estados Partes adopten las medidas necesarias para el pleno ejercicio del derecho al agua. Esta obligación comprende, entre otras cosas, la necesidad de reconocer en grado suficiente este derecho en el ordenamiento político y jurídico nacional, de preferencia mediante la aplicación de las leyes; adoptar una estrategia y un plan de acción nacionales en materia de recursos hídricos para el ejercicio de este derecho; velar por que el agua sea asequible para todos; y facilitar un acceso mayor y sostenible al agua, en particular en las zonas rurales y las zonas urbanas desfavorecidas.

Adicionalmente los Estados Partes deben adoptar estrategias y programas amplios e integrados para velar por que las generaciones presentes y futuras dispongan de agua suficiente y salubre<sup>22</sup>. Entre esas estrategias y esos programas podrían figurar: a) reducción de la disminución de recursos hídricos por extracción, desvío o contención; b) reducción y eliminación de la contaminación de las cuencas hidrográficas y de los ecosistemas relacionados con el agua por radiación, sustancias químicas nocivas y excrementos humanos; c) vigilancia de las reservas de agua; d) seguridad de que cualquier mejora propuesta no obstaculice el acceso al agua potable; e) examen de las repercusiones que puedan tener ciertas medidas en la disponibilidad del agua y en las cuencas hidrográficas de los ecosistemas naturales, tales como los cambios climáticos, la desertificación y la creciente salinidad del suelo, la deforestación y la

Expediente No. 25000-23-27-000-2001-0479-01  
Acumulados Nos. 2000-0428, 2001-0122, 2001-0343  
Actor: GUSTAVO MOYA ÁNGEL Y OTROS  
Acción Popular

pérdida de biodiversidad<sup>73</sup>; f) aumento del uso eficiente del agua por parte de los consumidores; g) reducción del desperdicio de agua durante su distribución; h) mecanismos de respuesta para las situaciones de emergencia; e i) creación de instituciones competentes y establecimiento de disposiciones institucionales apropiadas para aplicar las estrategias y los programas.

Las violaciones del derecho al agua pueden producirse mediante *actos de comisión*, la acción directa de los Estados Partes o de otras entidades que no estén suficientemente reglamentadas por los Estados.

Entre las violaciones por *actos de omisión* figuran el no adoptar medidas apropiadas para garantizar el pleno disfrute del derecho universal al agua, el no contar con una política nacional sobre el agua y el no hacer cumplir las leyes pertinentes.

La Comisión precisa que en el plano nacional deberán examinarse la legislación, las estrategias y las políticas existentes para determinar que sean compatibles con las obligaciones relativas al derecho al agua, y deberán derogarse, enmendarse o cambiarse las que no sean congruentes con las obligaciones dimanantes del Pacto.

El deber de adoptar medidas claramente impone a los Estados Partes la obligación de adoptar una estrategia o plan de acción nacional para asegurar el ejercicio del

---

<sup>73</sup> 23 Véase el Convenio sobre Diversidad Biológica, la Convención de lucha contra la desertificación, la Convención Marco de las Naciones Unidas sobre el cambio climático y los protocolos ulteriores.

Expediente No. 25000-23-27-000-2001-0479-01  
Acumulados Nos. 2000-0428, 2001-0122, 2001-0343  
Actor: GUSTAVO MOYA ÁNGEL Y OTROS  
Acción Popular

derecho al agua. La estrategia debe: a) basarse en la normativa y los principios de derechos humanos; b) abarcar todos los aspectos del derecho al agua y las obligaciones correspondientes de los Estados Partes; c) definir objetivos claros; d) fijar objetivos o metas y los plazos para su consecución; e) formular políticas adecuadas, con los niveles de referencia y los indicadores correspondientes. La estrategia también deberá responsabilizar del proceso a instituciones específicas; determinar los recursos disponibles para alcanzar los objetivos y las metas; asignar debidamente los recursos a las instituciones encargadas; y establecer mecanismos de rendición de cuentas para asegurar la aplicación de la estrategia.

Al formular y ejecutar las estrategias y planes nacionales de acción con respecto al agua deberán respetarse, entre otros, los principios de no discriminación y de participación popular. El derecho de los particulares y grupos a participar en los procesos de decisión que puedan afectar a su ejercicio del derecho al agua debe ser parte integrante de toda política, programa o estrategia con respecto al agua. Deberá proporcionarse a los particulares y grupos un acceso pleno e igual a la información sobre el agua, los servicios de agua y medio ambiente que esté en posesión de las autoridades públicas o de terceros.

La estrategia y el plan de acción nacionales del agua también deberán basarse en los principios de la rendición de cuentas, la transparencia y la independencia del poder judicial, ya que el buen gobierno es indispensable para

Expediente No. 25000-23-27-000-2001-0479-01  
Acumulados Nos. 2000-0428, 2001-0122, 2001-0343  
Actor: GUSTAVO MOYA ÁNGEL Y OTROS  
Acción Popular

el ejercicio efectivo de todos los derechos humanos, incluido el derecho al agua. A fin de crear un clima propicio al ejercicio de este derecho, los Estados Partes deberán adoptar las medidas apropiadas para cerciorarse de que, al desarrollar sus actividades, el sector de la empresa privada y la sociedad civil conozcan y tengan en cuenta la importancia del derecho al agua.

Si los Estados Partes encuentren conveniente aprobar una legislación marco para llevar a la práctica sus estrategias relativas al derecho al agua. Esa legislación deberá incluir: a) los objetivos o metas que han de alcanzarse, y los plazos para su consecución; b) los medios que se utilizarán para alcanzar la finalidad perseguida; c) la colaboración prevista con la sociedad civil, el sector privado y las organizaciones internacionales; d) las instituciones encargadas del proceso; e) los mecanismos nacionales para la vigilancia del proceso; y f) los procedimientos de reparación y de recursos.

Deberán adoptarse igualmente medidas para garantizar una coordinación suficiente entre los ministerios nacionales y las autoridades regionales y locales a fin de conciliar las políticas relacionadas con el agua. En los casos en que la responsabilidad de hacer efectivo el derecho al agua se haya delegado en las autoridades regionales obligaciones en virtud del Pacto, y por tanto deberá velar por que estas autoridades tengan a su disposición suficientes recursos para mantener y ampliar los servicios e instalaciones de agua necesarios. Además, los Estados Partes deberán velar por que dichas autoridades

Expediente No. 25000-23-27-000-2001-0479-01  
Acumulados Nos. 2000-0428, 2001-0122, 2001-0343  
Actor: GUSTAVO MOYA ÁNGEL Y OTROS  
Acción Popular

no nieguen el acceso a los servicios sobre una base discriminatoria.

Adicionalmente, el CDESC manifiesta que los Estados Partes deben alentar a los jueces, árbitros y demás jurisconsultos a que, en el desempeño de sus funciones, presten mayor atención a las violaciones del derecho al agua.

En consecuencia, el derecho al agua, cuando no está reconocido como un derecho fundamental como ocurre en las constituciones de algunos países, se protege de manera indirecta por su conexión con otros derechos expresamente reconocidos.

Cabe anotar finalmente que mediante la Resolución 64/292 aprobada por la Asamblea General de Naciones Unidas el 28 de junio de 2010 se hace por primera vez un reconocimiento expreso de la existencia de un Derecho Humano al agua, al precisar en dicho documento que la Asamblea "1. **"Reconoce que el derecho al agua potable y el saneamiento es un derecho humano esencial para el pleno disfrute de la vida y de todos los derechos humanos"**<sup>74</sup>.

### I.3. PRINCIPIOS CONSTITUCIONALES

Entre los principios que guían el derecho ambiental se encuentran el de precaución y el de desarrollo

---

<sup>74</sup> Resolución 64/292 Asamblea General de Naciones Unidas. Disponible en <http://daccess-dds-ny.un.org/doc/UNDOC/GEN/N09/479/38/PDF/N0947938.pdf?OpenElement>

Expediente No. 25000-23-27-000-2001-0479-01  
Acumulados Nos. 2000-0428, 2001-0122, 2001-0343  
Actor: GUSTAVO MOYA ÁNGEL Y OTROS  
Acción Popular

sostenible, los cuales serán desarrollados conceptualmente a continuación:

### **I.3.1. EL PRINCIPIO DE PRECAUCIÓN**

Según Néstor Cafferatta<sup>75</sup>, el principio de precaución implica un cambio de la lógica jurídica clásica. El principio de precaución surge en el derecho de la búsqueda de respuestas a un problema nuevo, a nuevos derechos que tienen incidencia colectiva, y se refieren a intereses difusos o derechos de masa, derechos comunitarios, como son los derechos ambientales.

El principio de precaución, dice el autor, opera sobre el riesgo del desarrollo, el riesgo de la demora, y produce una inversión de la carga de la prueba.

Añade que el principio de precaución tiene una estructura tridimensional, porque es de derecho pero al mismo tiempo comparte su territorio con la moral y la política. En muchas leyes se menciona el principio de precaución como principio de política ambiental y no como un principio de derecho. La **UNESCO**, por ejemplo, define al principio de precaución en términos de proyectos, actividades u obras plausibles desde el punto de vista científico, pero moralmente inaceptables.

---

<sup>75</sup> Cafferatta Néstor "Los principios y reglas del Derecho ambiental"  
<http://www.pnuma.org/deramb/documentos/VIProgramaRegional/3%20BASES%20DERECHO%20AMB/7%20Cafferata%20Principios%20y%20reglas%20del%20der%20amb.pdf>

Expediente No. 25000-23-27-000-2001-0479-01  
Acumulados Nos. 2000-0428, 2001-0122, 2001-0343  
Actor: GUSTAVO MOYA ÁNGEL Y OTROS  
Acción Popular

En ese caso, continúa el autor, la duda opera en favor de la prevención o de la precaución, en el sentido de que hay que adoptar medidas tendientes a evitar o impedir la degradación del medio ambiente. El principio precautorio, o criterio de precaución, tiene hoy *"carta de ciudadanía"* en el Derecho ambiental latinoamericano y caribeño. Se sabe que el principio de precaución apareció por primera vez en Alemania en 1971, en la Ley del Medio Ambiente. Después, en el Derecho del Mar, en la Primera y la Tercera Conferencia Internacional del Mar del Norte, entre 1987 y 1990, y si bien tiene una larga trayectoria en distintos convenios internacionales —aparece por ejemplo en 1991 en el Convenio de Bamako, África, sobre Movimientos Transfronterizos de Desechos Peligrosos y en Convenios relativos a la protección del Mar Báltico—, definitivamente volvió al Derecho Ambiental en 1992, en la Conferencia de Naciones Unidas sobre el Medio Ambiente y el Desarrollo, donde se lo consagró en la letra del Preámbulo de la Convención sobre Diversidad Biológica. Posteriormente, se lo instituyó como el artículo 3.3 de la Convención Marco del Cambio Climático, se incluyó como el Principio 15 de la Declaración de Río de Janeiro y, finalmente, fue utilizado para darle vida al Protocolo de Cartagena sobre Bioseguridad, el cual fue aprobado en Montreal en 2000. Por último, constituye un principio fundamental de política ambiental de la Unión Europea, a través del artículo 130R del Tratado Maastricht y el 174 del modificadorio de Tratado de Ámsterdam.

En la Declaración de Río dice que cuando exista *"peligro o daño grave o irreversible, la falta de certeza científica absoluta no deberá utilizarse como argumento*

Expediente No. 25000-23-27-000-2001-0479-01  
Acumulados Nos. 2000-0428, 2001-0122, 2001-0343  
Actor: GUSTAVO MOYA ÁNGEL Y OTROS  
Acción Popular

*para postergar la adopción de medidas eficaces en función de los costos, para impedir la degradación del medio ambiente".*

En el artículo 3.3 de la Convención Marco del Cambio Climático, se menciona que cuando haya "*'amenaza' de daño grave irreversible, no deberá utilizarse la falta de total certidumbre científica*", como razón para posponer tales medidas, tomando en cuenta que las políticas y las medidas para hacer frente al cambio climático deben ser eficaces en función de los costos, con el fin de asegurar beneficios globales al menor costo posible; en la Tercera Conferencia sobre Protección del Mar del Norte se le refiere a "*cuando no exista certeza científica que permita probar una relación causal, entre la emisión de dichas sustancias y tales efectos*"; en el Convenio de Diversidad Biológica se habla de "*falta de pruebas científicas inequívocas como razón para aplazar las medidas encaminadas a evitar o a reducir esta amenaza*"<sup>76</sup>; en Cartagena y en Johannesburgo aparece nuevamente como criterio de precaución.

La declaración de la **UNESCO** que se mencionó con anterioridad dice: "*Cuando la actividad humana pueda conducir a un daño moralmente inaceptable que es científicamente plausible pero incierto, diversas medidas pueden ser tomadas para evitar o disminuir la posibilidad de este daño*".

---

<sup>76</sup> "Le Principe de precaution" edite par Edwin Zaccai et Jean Noel Missa Bruselas, Editions de l Université de Bruxelles, 2000.

Expediente No. 25000-23-27-000-2001-0479-01  
Acumulados Nos. 2000-0428, 2001-0122, 2001-0343  
Actor: GUSTAVO MOYA ÁNGEL Y OTROS  
Acción Popular

En cuanto a su obligatoriedad, el principio precautorio, dice Lorenzetti citado por Cafferatta, *"genera una obligación de previsión extendida y anticipatoria. Se trata de un principio proactivo en la adopción de decisiones, es un concepto jurídico indeterminado, es una norma jurídica, no una mera declaración y la incertidumbre debe existir al momento de adoptar las decisiones."*

En consecuencia, en la aplicación de principio precautorio él dice que deberá tenerse en cuenta que:

1. Es casuístico. El principio precautorio se aplica con un criterio caso por caso, no se aplica de manera absoluta sino con un criterio relativo, dependiendo de las circunstancias del caso en particular.
2. Deberán agotarse las posibilidades de reducir la incertidumbre, aunque uno de los presupuestos del principio precautorio es justamente la incertidumbre.
3. La aplicación es dinámica y adaptativa.
4. Es equitativa.
5. Produce el traslado del riesgo, del riesgo de la duda, de la demora, probatorio -la inversión de la carga de la prueba- y del de desarrollo.

Precisa el autor que, estas son las condiciones de aplicabilidad del principio precautorio según la doctrina mayoritaria. En una situación de incertidumbre, el principio precautorio se basa en un factor de atribución de responsabilidad de riesgo. Es decir, el factor de

Expediente No. 25000-23-27-000-2001-0479-01  
Acumulados Nos. 2000-0428, 2001-0122, 2001-0343  
Actor: GUSTAVO MOYA ÁNGEL Y OTROS  
Acción Popular

atribución de responsabilidad del principio de precaución, es el riesgo, es el peligro o es la amenaza. "Peligro de daño grave o irreversible" y "falta de certeza científica absoluta" es lo que menciona el Principio 15 de Naciones Unidas.

La Unión Europea, preocupada por este efecto del traslado del riesgo probatorio, de inversión de la carga de la prueba, ha sostenido en una resolución –Anexo al Tratado Niza del año 2000 de la Comisión Europea– que el principio de precaución no siempre produce la inversión de la carga de la prueba. Menciona que el criterio correcto en materia de inversión de la carga de la prueba, es uno casuístico. Habrá que analizar caso por caso para determinar si se produce o no la inversión de la carga de la prueba.

De otra parte, no obstante el principio de precaución que se menciona en el artículo 191 del Tratado de Funcionamiento de la Unión Europea (UE), pretende garantizar un elevado nivel de protección del medio ambiente mediante la adopción de decisiones preventivas en caso de riesgo; en la práctica, su ámbito de aplicación es mucho más amplio y se extiende asimismo a la política de los consumidores, a la legislación europea relativa a los alimentos, a la salud humana, animal y vegetal.

De este modo, la citada Comunicación establece **líneas directrices comunes** acerca de la aplicación del principio de precaución.

Expediente No. 25000-23-27-000-2001-0479-01  
Acumulados Nos. 2000-0428, 2001-0122, 2001-0343  
Actor: GUSTAVO MOYA ÁNGEL Y OTROS  
Acción Popular

Según la Comisión Europea, puede invocarse el principio de precaución cuando un fenómeno, un producto o un proceso pueden tener efectos potencialmente peligrosos identificados por una evaluación científica y objetiva, si dicha evaluación no permite determinar el riesgo con suficiente certeza.

El recurso al principio se inscribe, por tanto, en el marco general del **análisis de riesgo** (que incluye, al margen de la evaluación del riesgo, la gestión del riesgo y la comunicación del riesgo) y, más concretamente, en el marco de la **gestión del riesgo** que corresponde a la fase de toma de decisiones.

La Comisión subraya que el principio de precaución solo se puede invocar en la hipótesis de un riesgo potencial, y que en ningún caso puede justificar la adopción de una decisión arbitraria.

Por tanto, el recurso al principio de precaución solo está justificado si se cumplen las **tres condiciones siguientes**:

- Identificación de los efectos potencialmente negativos;
- Evaluación de los datos científicos disponibles;
- Ampliación de la incertidumbre científica.

Antes de adoptar una medida, debe intentarse completar, en la medida de lo posible, los siguientes cuatro elementos de la evaluación de riesgos:

Expediente No. 25000-23-27-000-2001-0479-01  
Acumulados Nos. 2000-0428, 2001-0122, 2001-0343  
Actor: GUSTAVO MOYA ÁNGEL Y OTROS  
Acción Popular

**La identificación del peligro** significa determinar los agentes biológicos, químicos o físicos que pueden tener efectos adversos. Una nueva sustancia o agente biológico puede revelarse a través de sus efectos sobre la población (enfermedad o muerte), o sobre el medio ambiente, y puede ser posible describir los efectos reales o potenciales sobre la población o el medio ambiente antes de que se identifique la causa de forma indudable.

**La caracterización del peligro** consiste en determinar, en términos cuantitativos o cualitativos, la naturaleza y gravedad de los efectos adversos asociados con los agentes o la actividad que los causa. En esta fase debe establecerse la relación entre la cantidad de sustancia peligrosa y el efecto que produce. No obstante, a veces es difícil o imposible probar la relación, por ejemplo porque el vínculo causal no haya podido determinarse de manera indudable.

**La evaluación de la exposición** consiste en evaluar cuantitativa o cualitativamente la probabilidad de exposición al agente estudiado. Aparte de la información sobre los propios agentes (fuente, distribución, concentraciones, características, etc.), se necesitan datos sobre la probabilidad de contaminación o exposición al peligro de la población o el medio ambiente.

**La caracterización del riesgo** corresponde a la estimación cualitativa o cuantitativa, teniendo en cuenta las incertidumbres inherentes, la probabilidad, la frecuencia

Expediente No. 25000-23-27-000-2001-0479-01  
Acumulados Nos. 2000-0428, 2001-0122, 2001-0343  
Actor: GUSTAVO MOYA ÁNGEL Y OTROS  
Acción Popular

y la gravedad de los potenciales efectos adversos que pueden incidir sobre el medio ambiente o la salud. Esta caracterización se establece basándose en los tres elementos anteriores y depende en gran medida de las incertidumbres, variaciones, hipótesis de trabajo y conjeturas que se hayan formulado en cada fase del proceso. Cuando los datos disponibles son inadecuados o no concluyentes, un planteamiento prudente y cauteloso de la protección del medio ambiente, la salud o la seguridad podría consistir en optar por la «hipótesis más pesimista»; la acumulación de dichas hipótesis produce una exageración del riesgo real, pero a la vez infunde cierta seguridad de que no será infravalorado.

A su vez, las autoridades encargadas de la gestión del riesgo pueden decidir actuar o de no actuar en función del nivel de riesgo. Si el riesgo es elevado, se pueden adoptar varias categorías de medidas. Se puede tratar de actos jurídicos proporcionados, de la financiación de programas de investigación, de medidas de información al público, etc.

Como directrices comunes a la aplicación del principio de precaución la Comisión señala que ella debe guiarse por **tres principios específicos**:

- Una evaluación científica lo más completa posible y la determinación, en la medida de lo posible, del grado de incertidumbre científica;
- Una determinación del riesgo y de las consecuencias potenciales de la inacción;

Expediente No. 25000-23-27-000-2001-0479-01  
Acumulados Nos. 2000-0428, 2001-0122, 2001-0343  
Actor: GUSTAVO MOYA ÁNGEL Y OTROS  
Acción Popular

- La participación de todas las partes interesadas en el estudio de medidas de precaución, tan pronto como se disponga de los resultados de la evaluación científica o de la determinación del riesgo.

Además, la Comisión define los **principios generales** de la gestión de los riesgos cuando se invoca el principio de precaución. Se trata de los cinco principios siguientes:

- La proporcionalidad entre las medidas adoptadas y el nivel de protección elegido;
- La no discriminación en la aplicación de las medidas;
- La coherencia de las medidas con las ya adoptadas en situaciones similares o utilizando planteamientos similares;
- El análisis de las ventajas y los inconvenientes que se derivan de la acción o de la inacción;
- La revisión de las medidas a la luz de la evolución científica.

En relación con la carga de la prueba, en la mayoría de los casos, los consumidores europeos y las asociaciones que les representan deben demostrar el riesgo que entraña un procedimiento o un producto una vez comercializado, excepto en el caso de los medicamentos, los pesticidas o los aditivos alimentarios.

Expediente No. 25000-23-27-000-2001-0479-01  
Acumulados Nos. 2000-0428, 2001-0122, 2001-0343  
Actor: GUSTAVO MOYA ÁNGEL Y OTROS  
Acción Popular

Por tanto, en el caso de una acción adoptada en virtud del principio de precaución, se puede exigir que el productor, el fabricante o el importador demuestren la ausencia de peligro. Esta posibilidad debe examinarse en cada caso. No se puede ampliar de forma general a todos los productos y procesos de comercialización<sup>77</sup>.

Respecto de la aplicación de las líneas directrices de la Comunicación de la Comisión Europea (COM(2000)1) señala Henry Belveze<sup>78</sup> que éstas resultan necesarias para fijar las condiciones generales de una visión basada sobre la utilización del principio de precaución. Estas líneas directrices, sin ser jurídicamente limitantes, deberían proveer recomendaciones generales a los tomadores de decisiones y a los juristas para basar esta visión sobre principios razonables, para evitar una utilización irracional de la precaución pudiendo servir en ciertos casos de justificación abusiva a un proteccionismo económico disfrazado. En ausencia de tales líneas directivas, la comprensión y las características de una visión cimentada sobre la precaución, serán definidas caso por caso por la jurisprudencia en el órgano de reglamento de los diferendos de la OMC.

En cuanto a los fundamentos jurídicos del principio de precaución, Belveze, señala que el concepto de principio precaución ha sido considerablemente desarrollado y

---

<sup>77</sup>Cfr.[http://europa.eu/legislation\\_summaries/consumers/consumer\\_safety/l32042\\_es.htm](http://europa.eu/legislation_summaries/consumers/consumer_safety/l32042_es.htm)

<sup>78</sup> Belveze Henri, "Lignes directrices pour l'application du principe de précaution" en "Le Principe de Précaution: Significations et Conséquences" Edité par Edwin Zaccai et Jean Noel Missa. Bruselas (Bélgica) Editions de l'Université de Bruxelles 2002.

Expediente No. 25000-23-27-000-2001-0479-01  
Acumulados Nos. 2000-0428, 2001-0122, 2001-0343  
Actor: GUSTAVO MOYA ÁNGEL Y OTROS  
Acción Popular

jurídicamente establecido en el ámbito de la protección del medio ambiente. Numerosas convenciones internacionales han instaurado este principio como base de las acciones de prevención.

La Declaración de Río en 1992 adoptó en el principio 15: *"para proteger el medio ambiente, medidas de precaución deben ser ampliamente aplicadas por los estados según sus capacidades. En caso de riesgo y daños graves o irreversibles, la ausencia de certeza científica absoluta, no debe servir como pretexto para postergar la adopción de medidas efectivas tendientes a prevenir la degradación del medio ambiente"* y la convención sobre los cambios climáticos prevén su artículo 3 disposiciones análogas.

En el mismo sentido, el tratado de Ámsterdam ha modificado el artículo 130 R (2) del tratado sobre la unión europea como sigue:

*"La política de la comunidad en el tema del medio ambiente apunta a un nivel de protección elevado, teniendo en cuenta la diversidad de las situaciones en las diferentes regiones de la comunidad. Ella está fundada sobre los principios de precaución y de acción preventiva, sobre el principio de la corrección, por prioridad a la fuente, de daños al medio ambiente y sobre el principio del contaminante-pagador".*

Así, Belveze ha definido el principio de precaución *"como una visión de gestión de los riesgos que se ejerce en una situación de incertidumbre científica, expresando una exigencia de acción frente a un riesgo potencialmente*

Expediente No. 25000-23-27-000-2001-0479-01  
Acumulados Nos. 2000-0428, 2001-0122, 2001-0343  
Actor: GUSTAVO MOYA ÁNGEL Y OTROS  
Acción Popular

*grave sin esperar los resultados de la investigación científica."*

En ese contexto, afirma, la definición del principio de precaución es suficientemente amplia y general para permitir la realización de una evaluación de riesgo incluso cuando los datos científicos están incompletos, son imprecisos o no cuantificables. Desde esta perspectiva la realización de una evaluación de riesgo debería considerarse un prerrequisito indispensable a la utilización del principio precaución. En materia biológica y especialmente del tema de la microbiología se puede incluso considerar que los coeficientes de incertidumbre ligados a las evaluaciones cuantitativas de las relaciones dosis/efectos llevan la mayor parte del tiempo a fundar las medidas sanitarias o fitosanitarias en parte sobre una evaluación cualitativa y no cuantitativa del riesgo.

Una visión de precaución, según el autor, debe tomar en cuenta, como lo hace ya la gestión normal de riesgos, los riesgos actuales pero también los riesgos por las generaciones futuras tales como los riesgos de mutaciones genéticas o de perturbaciones endocrinas ligadas a la bio-acumulación de sustancias tóxicas o radiactivas. El concepto de desarrollo sostenible introdujo el principio de igualdad entre las generaciones. Este principio debe ser parte integrante del de precaución, toda vez que, en general, es relativamente fácil convencer a las partes en cuestión sobre la necesidad de adoptar medidas frente a los riesgos inmediatos que tengan repercusiones visibles sobre la salud de las personas los animales o las plantas

Expediente No. 25000-23-27-000-2001-0479-01  
Acumulados Nos. 2000-0428, 2001-0122, 2001-0343  
Actor: GUSTAVO MOYA ÁNGEL Y OTROS  
Acción Popular

en un plazo suficientemente corto después de la exposición para que la relación de causa efecto sea considerada como muy probable. Al contrario, cuando los efectos son a mucho más largo plazo, por ejemplo 10 o 20 años después de la exposición, o incluso pudiendo afectar las generaciones futuras, se hace mucho más difícil convencer a los tomadores de decisión y a las partes implicadas de que adopten en la ausencia de certezas científicas, medidas de prevención que tendrán repercusiones importantes e inmediatas sobre la economía de un sector industrial o agrícola. La tentación en este caso es de remitirse a los desarrollos futuros de la ciencia para encontrar soluciones a los problemas que nuestra falta de previsión habrá dejado en herencia a las generaciones siguientes.

En general, el principio de precaución se afirma progresivamente como una regla de aplicación directa y autónoma en lo referente a las decisiones que deban adoptar las autoridades públicas en un contexto de incertidumbre científica y las decisiones judiciales han contribuido a afirmar la eficacia de este principio<sup>79</sup>.

En Colombia el principio está consagrado en el numeral 6 del artículo 1º de la ley 99 de 1993, según el cual:

*"Cuando exista peligro de daño grave e irreversible, la falta de certeza científica absoluta no deberá utilizarse como razón para postergar la adopción de medidas eficaces para impedir la degradación del medio ambiente".*

---

<sup>79</sup> "Le Principe de precaution" edite par Edwin Zaccai et Jean Noel Missa, Bruselas, Editions de l'Université de Bruxelles, 2000.

Expediente No. 25000-23-27-000-2001-0479-01  
Acumulados Nos. 2000-0428, 2001-0122, 2001-0343  
Actor: GUSTAVO MOYA ÁNGEL Y OTROS  
Acción Popular

En relación con este principio la Corte Constitucional en sentencia C-339 de 2002<sup>80</sup>, se refirió en el siguiente sentido:

*"(...) cuando la autoridad ambiental debe tomar decisiones específicas, encaminadas a evitar un peligro de daño grave, sin contar con la certeza científica absoluta, lo debe hacer de acuerdo con las políticas ambientales trazadas por la ley, en desarrollo de la Constitución, en forma motivada y alejada de toda posibilidad de arbitrariedad o capricho.*

*Para tal efecto, debe constatar que se cumplan los siguientes elementos:*

- 1. Que exista peligro de daño;*
- 2. Que éste sea grave e irreversible;*
- 3. Que exista un principio de certeza científica, así no sea ésta absoluta;*
- 4. Que la decisión que la autoridad adopte esté encaminada a impedir la degradación del medio ambiente.*
- 5. Que el acto en que se adopte la decisión sea motivado.*

*Es decir, el acto administrativo por el cual la autoridad ambiental adopta decisiones, sin la certeza científica absoluta, en uso del principio de precaución, debe ser excepcional y motivado. Y, como cualquier acto administrativo, puede ser demandado ante la jurisdicción de lo contencioso administrativo. Esto hace que la decisión de la autoridad se enmarque dentro del Estado de Derecho, en el que no puede haber decisiones arbitrarias o caprichosas, y que, en el evento de que esto ocurra, el ciudadano tiene a su disposición todas las herramientas que el propio Estado le otorga. En este sentido no hay violación del debido proceso, garantizado en el artículo 29 de la Constitución".*

---

<sup>80</sup> Magistrado Ponente: Dr. Jaime Araujo Rentería.

Expediente No. 25000-23-27-000-2001-0479-01  
Acumulados Nos. 2000-0428, 2001-0122, 2001-0343  
Actor: GUSTAVO MOYA ÁNGEL Y OTROS  
Acción Popular

En ese sentido, el principio de precaución ha de ser aplicado por el Estado en la toma de decisiones encaminadas a la protección del medio ambiente, y su decisión no será considerada arbitraria ni vulneradora de otros derechos fundamentales de aquellas personas que resulten afectadas con la medida, siempre que, observe las siguientes reglas: "(i) que exista peligro de daño, (ii) que éste sea grave e irreversible, (iii) que exista un principio de certeza científica, así no sea ésta absoluta, (iv) que la decisión que la autoridad adopte esté encaminada a impedir la degradación del medio ambiente y (v) que el acto en que se adopte la decisión sea motivado".

En la misma providencia, explicó que la aplicación del principio de precaución en materia ambiental, no corresponde únicamente al Estado, toda vez que los particulares también deberán acogerse a él y aplicarlo:

*"4.2 En cuanto hace a la aplicación del principio de precaución para la preservación del medio ambiente por los particulares, ha de entenderse que el deber de protección a que se hace alusión no recae sólo en cabeza del Estado, dado que lo que está en juego es la protección ambiental de las generaciones presentes y la propia supervivencia de las futuras. Por ello, el compromiso de proteger el medio ambiente es responsabilidad de todas las personas y ciudadanos e involucra a los Estados, trasciende los intereses nacionales, y tiene importancia universal.*

*En el ámbito nacional, se trata de una responsabilidad enmarcada expresamente por la Constitución como uno de los deberes de la persona y del ciudadano, al que se refiere el artículo 95, así:*

Expediente No. 25000-23-27-000-2001-0479-01  
 Acumulados Nos. 2000-0428, 2001-0122, 2001-0343  
 Actor: GUSTAVO MOYA ÁNGEL Y OTROS  
 Acción Popular

**"Artículo 95.**

"(...)

"Son deberes de la persona y del ciudadano:

"8. Proteger los recursos culturales y naturales del país y velar por la conservación de un ambiente sano; "

*Por ello, la mención que el artículo acusado hace de los particulares, debe considerarse como la obligación que ellos tienen de tomar las medidas de precaución, cuando exista peligro de daño grave e irreversible al medio ambiente, aún en el caso de que el particular no tenga la certeza científica absoluta de que tal daño se produzca.*

*En consecuencia, el principio de precaución como está consagrado en el numeral 6 del artículo 1 de la Ley 99 de 1993, se declarará exequible, por los cargos expuestos."*

Por su parte, en la sentencia C-703 de 2010<sup>81</sup>, precisó:

*"Los principios que guían el derecho ambiental son los de prevención y precaución, que persiguen, como propósito último, el dotar a las respectivas autoridades de instrumentos para actuar ante la afectación, el daño, el riesgo o el peligro que enfrenta el medio ambiente, que lo comprometen gravemente, al igual que a los derechos con él relacionados. Así, tratándose de daños o de riesgos, en los que es posible conocer las consecuencias derivadas del desarrollo de determinado proyecto, obra o actividad, de modo que la autoridad competente pueda adoptar decisiones antes de que el riesgo o el daño se produzcan, con el fin de reducir sus repercusiones o de evitarlas, opera el principio de prevención que se materializa en mecanismos jurídicos tales como la evaluación del impacto ambiental o el trámite y expedición de autorizaciones previas, cuyo presupuesto es la*

---

<sup>81</sup> Magistrado Ponente: Dr. Gabriel Eduardo Mendoza Martelo.

Expediente No. 25000-23-27-000-2001-0479-01  
 Acumulados Nos. 2000-0428, 2001-0122, 2001-0343  
 Actor: GUSTAVO MOYA ÁNGEL Y OTROS  
 Acción Popular

posibilidad de conocer con antelación el daño ambiental y de obrar, de conformidad con ese conocimiento anticipado, a favor del medio ambiente; **en tanto que el principio de precaución o tutela se aplica en los casos en que ese previo conocimiento no está presente, pues tratándose de éste, el riesgo o la magnitud del daño producido o que puede sobrevenir no son conocidos con anticipación, porque no hay manera de establecer, a mediano o largo plazo, los efectos de una acción, lo cual tiene su causa en los límites del conocimiento científico que no permiten adquirir la certeza acerca de las precisas consecuencias de alguna situación o actividad, aunque se sepa que los efectos son nocivos**" (Subraya y negrilla fuera de texto original).

A más de lo anterior, en Sentencia T-154 de 2013<sup>82</sup> estableció:

**"Sexta. A falta de certeza científica, debe ser aplicado el principio de precaución.**

6.1. El Convenio sobre la Diversidad Biológica de Río de Janeiro de 1992 incluyó 27 principios generales, advirtiéndole que, con el fin de proteger el ambiente, los Estados deberán aplicar ampliamente el criterio de precaución, conforme a sus capacidades, "cuando haya peligro de daño grave e irreversible, **la falta de certeza científica absoluta no deberá utilizarse como razón para postergar la adopción de medidas eficaces en función de los costos para impedir la degradación del medio ambiente**" (no está en negrilla en el original, como tampoco en la cita anterior ni en las subsiguientes).

6.2. El numeral 6º del artículo 1º de la Ley 99 de diciembre 22 de 1993, consagró dicho criterio de precaución como un principio general, indicando que la política ambiental se fundamenta en criterios y estudios científicos, mas "las autoridades ambientales y los particulares darán aplicación al principio de precaución conforme al

---

<sup>82</sup> Magistrado Ponente: Dr. Nilson Pinilla Pinilla.

Expediente No. 25000-23-27-000-2001-0479-01  
 Acumulados Nos. 2000-0428, 2001-0122, 2001-0343  
 Actor: GUSTAVO MOYA ÁNGEL Y OTROS  
 Acción Popular

**cual, cuando exista peligro de daño grave e irreversible, la falta de certeza científica absoluta no deberá utilizarse como razón para postergar la adopción de medidas eficaces para impedir la degradación del medio ambiente".**

Esta corporación en fallo C-293 de abril 23 de 2002, M. P. Alfredo Beltrán Sierra, explicó que la autoridad ambiental es competente para aplicar el principio de precaución, mediante un acto administrativo motivado, en el caso de observarse "un peligro de daño, que éste sea grave e irreversible, que exista un principio de certeza científica, así no sea esta absoluta, que la decisión que la autoridad adopte esté encaminada a impedir la degradación del medio ambiente".

Después, en sentencia T-299 de abril 3 de 2008, M. P. Jaime Córdoba Triviño, la Corte realizó un resumen completo de la jurisprudencia constitucional existente hasta ese momento sobre la relevancia, el alcance y la aplicación en el ordenamiento jurídico interno del mencionado principio. Así se concluyó:

"(i) El Estado Colombiano manifestó su interés por aplicar el principio de precaución al suscribir la Declaración de Río sobre el Medio Ambiente y el Desarrollo; (ii) el principio hace parte del ordenamiento positivo, con rango legal, a partir de la expedición de la Ley 99 de 1993; (iii) esta decisión del legislativo no se opone a la constitución; por el contrario, es consistente con el principio de libre autodeterminación de los pueblos, y con los **deberes del Estado relativos a la protección del medio ambiente**; (iv) el Estado ha suscrito otros instrumentos internacionales, relativos al control de sustancias químicas en los que **se incluye el principio de precaución como una obligación que debe ser cumplida de conformidad con el principio de buena fe del derecho internacional**; (v)... el principio de precaución se encuentra constitucionalizado pues se desprende de la internacionalización de las relaciones ecológicas (art. 266 CP) y de los deberes de protección y prevención contenidos en los artículos 78, 79 y 80 de la Carta."<sup>[107]</sup>

Expediente No. 25000-23-27-000-2001-0479-01  
Acumulados Nos. 2000-0428, 2001-0122, 2001-0343  
Actor: GUSTAVO MOYA ÁNGEL Y OTROS  
Acción Popular

6.3. Es además ilustrativo acudir, en ámbito trasnacional de otras latitudes, a lo estatuido en el numeral 2º del artículo 174 de la Constitución de la Comunidad Europea, en cuanto consagra: "... la política medioambiental de la Unión tendrá como objetivo un **nivel elevado de protección**, teniendo presente la diversidad de situaciones existentes en las distintas regiones de la Unión. Se basará en los **principios de precaución y de acción preventiva**, en el principio de corrección de los daños al medio ambiente, preferentemente en el origen, y en el principio de que quien contamina paga."

6.4. Así, el principio de precaución conlleva la adopción de medidas eficaces para precaver la degradación del ambiente, sin que pueda sacrificarse su aplicación en aras de la inmadurez científica."

También, en Sentencia T-282 de 2012,<sup>83</sup> insistió en la importancia de la aplicación el principio de precaución en las decisiones del Estado para materializar la protección efectiva del medio ambiente, así:

"De esto da buena cuenta la inclusión dentro de los principios del Derecho ambiental, el de precaución in dubio pro natura y el de prevención, con los cuales se desactivan razonamientos y conclusiones jurídicas tradicionales, para dar lugar a instituciones como la cosa juzgada ambiental, la tangibilidad de las licencias y autorizaciones ambientales. Con ellas ciertamente se imponen cargas de rigurosa vigilancia y control por parte del Estado y se disminuye la certeza con que actúa el particular en ejercicio de sus libertades y facultades reconocidas y en cumplimiento de sus obligaciones. Sin embargo son fórmulas básicas para proteger con eficacia el derecho al ambiente sano y dentro de él la salvaguarda de los recursos naturales".

---

<sup>83</sup> Magistrado Ponente: Dr. Juan Carlos Henao Pérez.

Expediente No. 25000-23-27-000-2001-0479-01  
Acumulados Nos. 2000-0428, 2001-0122, 2001-0343  
Actor: GUSTAVO MOYA ÁNGEL Y OTROS  
Acción Popular

### **I.3.2. EL PRINIPICIO DE DESARROLLO SOSTENIBLE**

En razón al gran avance en el reconocimiento del derecho al goce de un ambiente sano, tanto a nivel normativo como jurisprudencial, ha surgido la necesidad de conciliar la protección del derecho con el desarrollo de las actividades económicas que generan impacto en el ambiente.

Es así como, se ha procurado dar una definición apropiada y adecuada al principio de "*Desarrollo Sostenible*", contenido en el artículo 80 de la Constitución Política, que impone al Estado el deber de planificar el manejo y aprovechamiento de los recursos naturales para garantizar su desarrollo sostenible.

Para ello, debe tenerse en especial consideración las diferentes dimensiones otorgadas al derecho al goce de un ambiente sano, específicamente en lo concerniente a su carácter de fundamental por la íntima relación que tiene con los derechos a la vida y a la salud.

Se ha podido establecer que, efectivamente, la mayoría de las actividades económicas llegan a degradar en tal magnitud el ambiente, entendido como entorno, paisaje, biodiversidad, recursos naturales, calidad de vida y/o patrimonio; que de continuarse con la explotación desmedida de los recursos se está poniendo en riesgo la subsistencia de la especie humana.

Debido a ello, la jurisprudencia constitucional ha establecido que la cuestión ambiental deberá abordarse

Expediente No. 25000-23-27-000-2001-0479-01  
Acumulados Nos. 2000-0428, 2001-0122, 2001-0343  
Actor: GUSTAVO MOYA ÁNGEL Y OTROS  
Acción Popular

desde varios puntos de vista, a saber: desde el ético, construyendo *"un principio biocéntrico que considera al hombre como parte de la naturaleza, otorgándoles a ambos valor"*; desde el económico, teniendo presente que *"el sistema productivo ya no puede extraer recursos ni producir desechos ilimitadamente, debiendo sujetarse al interés social, al ambiente y al patrimonio cultural de la nación,"* al bien común y a las normas ambientales; y, desde el jurídico, porque el Derecho y el Estado no *"solamente deben proteger la dignidad y la libertad del hombre frente a otros hombres, sino ante la amenaza que representa la explotación y el agotamiento de los recursos naturales; para lo cual deben **elaborar nuevos valores, normas, técnicas jurídicas y principios donde prime la tutela de valores colectivos frente a valores individuales.**"*<sup>84</sup>

Así las cosas, no obstante el concepto de Desarrollo Sostenible ha sido el escudo para *"blindar"* la ejecución de proyectos o la explotación de recursos que generan gran impacto y reacción negativa en la comunidad que resulta directamente afectada por éstos, el propósito de la doctrina y la jurisprudencia ha sido determinar las características y aspectos fundamentales de lo que ha de entenderse como Desarrollo Sostenible.

Para ello, resulta necesario que se cree, como se expresó, una nueva ética de los valores colectivos que logre integrar la dimensión del derecho colectivo fundamental al goce del ambiente sano, los derechos

---

<sup>84</sup> Corte Constitucional. Sentencia C-339 de 2002. M.P.: Jaime Araujo Rentería.

Expediente No. 25000-23-27-000-2001-0479-01  
Acumulados Nos. 2000-0428, 2001-0122, 2001-0343  
Actor: GUSTAVO MOYA ÁNGEL Y OTROS  
Acción Popular

fundamentales individualmente considerados y la producción de bienes y servicios de manera sostenible y lucrativa.

Desde la ciencia económica se ha venido estudiando la forma de conciliar el desarrollo industrial con la sostenibilidad del medio ambiente, para evitar la degradación de la vida en el planeta.

El término de "*desarrollo sostenible*" apareció definido por primera vez en el documento conocido como "*Informe Brundtland*" de 1987, producido en el marco de la Comisión Mundial de Medio Ambiente y Desarrollo de las Naciones Unidas, creada en Asamblea General de las Naciones Unidas en el año de 1983. Luego, la definición se plasmó como uno de los Principios adoptados en la Declaración de Río de 1992.

Sin embargo, el concepto de desarrollo sostenible se empezó a gestar con anterioridad al documento referido, cuando el progreso económico y la explotación desmedida de los recursos naturales empezó a comprometer la biodiversidad, en tal medida y a una velocidad tan vertiginosa, que ya en los años 70 se podía predecir la potencialidad de degradar, hasta su extinción, al planeta y a la subsistencia de las especies.

Por tal motivo, debía crearse una nueva forma de concebir el desarrollo económico, que tomara en consideración los aspectos medioambientales y sociales globales, para que en el largo plazo se pudiera garantizar la calidad de

Expediente No. 25000-23-27-000-2001-0479-01  
Acumulados Nos. 2000-0428, 2001-0122, 2001-0343  
Actor: GUSTAVO MOYA ÁNGEL Y OTROS  
Acción Popular

vida de la especie humana, conservando y respetando su entorno.

Fue así como, se determinó<sup>85</sup> que el desarrollo sostenible debía fundamentarse en 3 factores o pilares: sociedad, economía y medio ambiente, los cuales debían convivir en armonía cuando se fuera a definir un proyecto productivo.

Para ello, se consideró que la sostenibilidad económica de una actividad se conseguía cuando, respetando los aspectos sociales y medioambientales, ésta fuera financieramente posible y rentable.

Por su parte, se definió como sostenibilidad social de un proyecto o desarrollo económico, cuando éste permitía que se mantuviera la cohesión social y persiguiera la consecución de objetivos comunes a la comunidad del entorno en donde fuera a realizarse.

En cuanto a la sostenibilidad ambiental, se concibió como la concurrencia entre la actividad económica a realizar y la preservación de la biodiversidad y de los ecosistemas, buscando evitar su degradación.

Así las cosas, en el Informe de Brundtland, al Desarrollo Sostenible se lo definió como la opción productiva para lograr:

*"Satisfacer las necesidades de las generaciones presentes sin comprometer las posibilidades de*

---

<sup>85</sup>Oñate, J. J., Pereira, D., Suárez, F., Rodríguez, J. J., & Cachón, J. (2002). Evaluación Ambiental Estratégica: la evaluación ambiental de Políticas, Planes y Programas. Madrid: Ediciones Mundi-Prensa.

Expediente No. 25000-23-27-000-2001-0479-01  
Acumulados Nos. 2000-0428, 2001-0122, 2001-0343  
Actor: GUSTAVO MOYA ÁNGEL Y OTROS  
Acción Popular

*las del futuro para atender sus propias  
necesidades"*<sup>86</sup>

A partir de ahí, ha ido evolucionado el término para permitir que, con la entrada de las nuevas tecnologías en la producción se siga consiguiendo la armonía entre los desarrollos económicos y la protección de la naturaleza.

Por tal motivo, se han introducido, al concepto de desarrollo sostenible, criterios que posibiliten aquellas actividades productivas que conducen al crecimiento económico, a la elevación de la calidad de vida y al bienestar social, sin agotar la base de los recursos naturales renovables en que se sustenta, ni deteriorar el medio ambiente o el derecho de las generaciones futuras a utilizarlo para la satisfacción de sus propias necesidades.

En tal virtud, en la Constitución Política, en desarrollo de este principio, consagró en el artículo 80 que "el *Estado planificará el manejo y aprovechamiento de los recursos naturales para garantizar su desarrollo sostenible, su conservación o sustitución. Además, deberá prevenir y controlar los factores de deterioro ambiental, imponer las sanciones legales y exigir la reparación de los daños causados. Así mismo, cooperará con otras naciones en la protección de los ecosistemas situados en zonas fronterizas*".

---

<sup>86</sup> "Nuestro Futuro Común" (El Informe Brundtland). Oxford University Press, 1987.

Expediente No. 25000-23-27-000-2001-0479-01  
Acumulados Nos. 2000-0428, 2001-0122, 2001-0343  
Actor: GUSTAVO MOYA ÁNGEL Y OTROS  
Acción Popular

La jurisprudencia constitucional ha dedicado varios pronunciamientos a determinar el alcance del principio del desarrollo sostenible, toda vez que constituye el elemento para desatar la tensión existente entre el progreso económico y la protección al ambiente que éste pueda impactar.

Es así como, respecto del Desarrollo Sostenible, la Corte Constitucional ha manifestado que:

*"Dentro de este contexto es necesario conciliar el grave impacto ambiental de la minería con la protección de la biodiversidad y el derecho a un medio ambiente sano, para que ni uno ni otro se vean sacrificados. Es aquí donde entra el concepto del **desarrollo sostenible** acogido en el artículo 80 de nuestra Constitución y definido por la jurisprudencia de la Corte como un desarrollo que "satisfaga las necesidades del presente, sin comprometer la capacidad de que las futuras generaciones puedan satisfacer sus propias necesidades."*

*El desarrollo sostenible no es solamente un marco teórico sino que involucra un conjunto de instrumentos, entre ellos los jurídicos, que hagan factible el progreso de las próximas generaciones en consonancia con un desarrollo armónico de la naturaleza. En anteriores oportunidades esta Corte trató el concepto del desarrollo sostenible a propósito del "Convenio sobre la Diversidad Biológica" hecho en Río de Janeiro el 5 de junio de 1992. En esa oportunidad destacó:*

*"La Constitución Política de Colombia, con base en un avanzado y actualizado marco normativo en materia ecológica, es armónica con la necesidad mundial de lograr un desarrollo sostenible, pues no sólo obliga al Estado a planificar el manejo y aprovechamiento de los recursos naturales sino que además, al establecer el llamado tríptico económico determinó en él una función social, a*

Expediente No. 25000-23-27-000-2001-0479-01  
 Acumulados Nos. 2000-0428, 2001-0122, 2001-0343  
 Actor: GUSTAVO MOYA ÁNGEL Y OTROS  
 Acción Popular

la que le es inherente una función ecológica, encaminada a la primacía del interés general y del bienestar comunitario. Del contenido de las disposiciones constitucionales citadas se puede concluir que el Constituyente patrocinó la idea de hacer siempre compatibles el desarrollo económico y el derecho a un ambiente sano y a un equilibrio ecológico.”<sup>87</sup>

**Desde esta perspectiva el desarrollo económico y tecnológico en lugar de oponerse al mejoramiento ambiental, deben ser compatibles con la protección al medio ambiente y la preservación de los valores históricos y culturales.** El concepto de desarrollo sostenible no es nuevo, los principios 4, 8, 11 y 14 de la Declaración de Estocolmo establecen la importancia de la dimensión económica para el desarrollo sostenible, que luego fue reproducido por el Tratado de la Cuenca del Amazonas, del cual Colombia es uno de sus miembros exclusivos, en el cual se refirió a la relación entre ecología y economía de la siguiente manera: “(...) con el fin de alcanzar un desarrollo integral de sus respectivos territorios amazónicos, es necesario mantener un equilibrio entre el crecimiento económico y la conservación del medio ambiente”<sup>88</sup> (Negrilla y subraya fuera de texto original).

También, con el propósito de establecer el alcance de dicho principio, se ha acuñado el término de la “ecologización de la propiedad”, entendiendo ésta como la necesidad de limitar el derecho a la propiedad, no solo en función del respeto de los derechos de los otros sino también de aquellos que todavía no existen, como es el caso de las generaciones futuras.

<sup>87</sup>Corte Constitucional. Sentencia C-519 de 1994. M.P. Vladimiro Naranjo Mesa.

<sup>88</sup>Corte Constitucional. Sentencia C-339 de 2002. M.P.: Jaime Araujo Rentería.

Expediente No. 25000-23-27-000-2001-0479-01  
 Acumulados Nos. 2000-0428, 2001-0122, 2001-0343  
 Actor: GUSTAVO MOYA ÁNGEL Y OTROS  
 Acción Popular

En ese sentido, la jurisprudencia constitucional<sup>89</sup> expresó:

"Ahora bien, en la época actual, se ha producido una "ecologización" de la propiedad privada, lo cual tiene notables consecuencias, ya que el propietario individual no sólo debe respetar los derechos de los miembros de la sociedad de la cual hace parte (función social de la propiedad) sino que incluso sus facultades se ven limitadas por los derechos de quienes aún no han nacido, esto es, de las generaciones futuras, conforme a la función ecológica de la propiedad y a la idea del desarrollo sostenible. Por ello el ordenamiento puede imponer incluso mayores restricciones a la apropiación de los recursos naturales o a las facultades de los propietarios de los mismos, con lo cual la noción misma de propiedad privada sufre importantes cambios.

Cabe destacar que los derechos y las obligaciones ecológicas definidas por la Constitución Política giran, como lo reconoce el artículo 80 Superior, en torno al concepto de desarrollo sostenible, el cual, en palabras de esta Corporación, pretende, "superar una perspectiva puramente conservacionista en la protección del medio ambiente, al intentar armonizar el derecho al desarrollo -indispensable para la satisfacción de las necesidades humanas- con las restricciones derivadas de la protección al medio ambiente".

Así las cosas, es evidente que el desarrollo social y la protección del medio ambiente imponen un tratamiento unívoco e indisoluble que permita progresivamente mejorar las condiciones de vida de las personas y el bienestar social, pero sin afectar ni disminuir irracional o desproporcionadamente la diversidad natural y biológica de nuestro ecosistema.

Sobre este particular, la Corte ha señalado que:

---

<sup>89</sup>Corte Constitucional. Sentencia C-189 de 2006. M.P.: Rodrigo Escobar Gil.

Expediente No. 25000-23-27-000-2001-0479-01  
 Acumulados Nos. 2000-0428, 2001-0122, 2001-0343  
 Actor: GUSTAVO MOYA ÁNGEL Y OTROS  
 Acción Popular

"El crecimiento económico, fruto de la dinámica de la libertad económica y la propiedad privada, puede tener un alto costo ecológico y proyectarse en una desenfrenada e irreversible destrucción del medio ambiente, con las secuelas negativas que ello puede aparejar para la vida social. La tensión desarrollo económico -conservación y preservación del medio ambiente, que en otro sentido corresponde a la tensión bienestar económico - calidad de vida, ha sido decidida por el Constituyente en una síntesis equilibradora que subyace a la idea de desarrollo económico sostenible consagrada de diversas maneras en el texto constitucional (CP arts. 80, 268-7, 334, 339 y 340)".

En otro pronunciamiento este Tribunal dispuso:

**"Las normas ambientales, contenidas en diferentes estatutos, respetan la libertad de la actividad económica que desarrollan los particulares, pero le imponen una serie de limitaciones y condicionamientos a su ejercicio que tienden a hacer compatibles el desarrollo económico sostenido con la necesidad de preservar y mantener un ambiente sano. Dichos estatutos subordinaban el interés privado que representa la actividad económica al interés público o social que exige la preservación del ambiente, de tal suerte que el particular debe realizar su respectiva actividad económica dentro de los precisos marcos que le señala la ley ambiental, los reglamentos y las autorizaciones que debe obtener de la entidad responsable del manejo del recurso o de su conservación. (...)"**

El particular al realizar su actividad económica tiene que adecuar su conducta al marco normativo que la orienta, la controla y la verifica, con el fin de que no cause deterioro al ambiente, o lo reduzca a sus más mínimas consecuencias y dentro de los niveles permitidos por la autoridad ambiental. (...)

La autoridad ambiental, debe admitir el ejercicio de una actividad económica legítima cuando su ejercicio no comprometa los límites tolerables de la contaminación, pues si los excede, el bien

Expediente No. 25000-23-27-000-2001-0479-01  
Acumulados Nos. 2000-0428, 2001-0122, 2001-0343  
Actor: GUSTAVO MOYA ÁNGEL Y OTROS  
Acción Popular

*común exigirá que restrinja o se prohíba al particular el ejercicio de su actividad."*

Por último, la Corte Constitucional en la sentencia T-154 de 2013<sup>90</sup>, determinó:

*"4.3. Ahora bien, dentro del marco constitucional, el aprovechamiento de los recursos naturales, aunque es permitido, no puede dar lugar a perjuicios en términos de salubridad individual o social y tampoco puede acarrear un daño o deterioro que atente contra la diversidad e integridad del ambiente. En otras palabras, **la Constitución de 1991 apunta a un modelo de desarrollo sostenible, en el que la actividad productiva debe guiarse por los principios de conservación, restauración y sustitución.***

*Dicho modelo, si bien promueve y reconoce la importancia de la actividad económica privada y, además, admite la explotación mesurada de los recursos naturales, implica una limitación de la actividad privada y la imposición de varias responsabilidades en cabeza de los particulares.*

*En resumen, la conservación del ambiente no solo es considerada como un asunto de interés general, sino principalmente como un derecho internacional y local de rango constitucional, del cual son titulares todos los seres humanos, "en conexidad con el ineludible deber del Estado de garantizar la vida de las personas en condiciones dignas, precaviendo cualquier injerencia nociva que atente contra su salud."*

*Al efecto, la Constitución de 1991 impuso al Estado colombiano la obligación de asegurar las condiciones que permitan a las personas gozar de un ambiente sano, y dispuso el deber de todos de contribuir a tal fin, mediante la participación en la toma de decisiones ambientales y el ejercicio de acciones públicas y otras garantías individuales, entre otros"*

---

<sup>90</sup>Magistrado Ponente: Dr. Nilson Pinilla Pinilla.

Expediente No. 25000-23-27-000-2001-0479-01  
Acumulados Nos. 2000-0428, 2001-0122, 2001-0343  
Actor: GUSTAVO MOYA ÁNGEL Y OTROS  
Acción Popular

#### I.4. PLANTEAMIENTO DEL PROBLEMA A RESOLVER

Resulta de vital importancia, partir de señalar que la presente acción popular, será tratada en esta providencia desde una perspectiva sistémica e integral considerando que su propósito general es la mejora de la calidad de vida de quienes habitan a lo largo de la cuenca del río Bogotá. Cabe recordar, entonces, que se trata de abogar por la defensa de los derechos e intereses colectivos, y por tanto, dadas las amplias facultades que le ha otorgado el legislador al juez popular, es menester proporcionar los instrumentos que permitan una acción coordinada, articulada, eficiente y eficaz para la gestión integral del sistema hidrológico del río.

En cuanto a los poderes del juez popular, resulta de gran importancia precisar que de acuerdo con la Ley reguladora de la acción popular, la misma se ejerce para evitar el daño contingente, hacer cesar el peligro, la amenaza, la vulneración o agravio sobre los derechos e intereses colectivos, o restituir las cosas a su estado anterior si ello fuere posible- (**ARTÍCULO 2 LEY 472 DE 1998 / ARTÍCULO 144 LEY 1437 DE 2011**)-, cuando quiera que por la acción u omisión de las autoridades públicas o de los particulares, sean violados o amenazados - (**ARTÍCULO 9 LEY 472 DE 1998**) -. Casos en los que corresponde al juez adoptar las órdenes de hacer o de no hacer, definiendo de manera precisa la conducta a cumplir, condenar al pago de perjuicios cuando se haya causado daño y, en fin, exigir la realización de las conductas necesarias para volver las cosas al estado anterior a la vulneración del derecho o del interés colectivo, cuando fuere físicamente posible

Expediente No. 25000-23-27-000-2001-0479-01  
Acumulados Nos. 2000-0428, 2001-0122, 2001-0343  
Actor: GUSTAVO MOYA ÁNGEL Y OTROS  
Acción Popular

-(ARTÍCULO 34 LEY 472 DE 1998), de manera tal que se garantice la eficacia de los derechos vulnerados, como lo exige el artículo 88 constitucional.

Ciertamente, en la sentencia que ampara los derechos colectivos el juez está facultado para adoptar las medidas que, conforme a la situación fáctica probada, sean conducentes y pertinentes para obtener la protección de dichos derechos.

Lo anterior guarda coherencia con el artículo 2º de la Constitución Política al establecer que "las autoridades de la República están instituidas para proteger a todas las personas residentes en Colombia, en su vida, honra, bienes, creencias, y demás derechos y libertades, y para asegurar el cumplimiento de los deberes sociales del Estado y de los particulares".

En cuanto a los fines esenciales del Estado encontramos entre otros los de "servir a la comunidad, **promover la prosperidad general y garantizar la efectividad de los principios, derechos y deberes consagrados en la Constitución; facilitar la participación de todos en las decisiones que los afectan y en la vida económica, política, administrativa y cultural de la Nación; defender la independencia nacional, mantener la integridad territorial y asegurar la convivencia pacífica y la vigencia de un orden justo**" (ARTÍCULO 2 C.P.).

Cabe mencionar que la supremacía de las normas constitucionales exige, antes que la evocación de un enunciado formal de prevalencia de los derechos

Expediente No. 25000-23-27-000-2001-0479-01  
Acumulados Nos. 2000-0428, 2001-0122, 2001-0343  
Actor: GUSTAVO MOYA ÁNGEL Y OTROS  
Acción Popular

colectivos, **su plena eficacia material**. Y a ese objetivo debe orientarse imperiosamente la actividad de las autoridades, incluyendo la tarea del juez de la acción popular, **pues un entendimiento distinto conduciría al desconocimiento de uno de los fines esenciales del Estado social**, para el efecto la participación en la protección de los derechos colectivos con la eficacia que su trascendencia exige. Desde antaño se conoce que un derecho se garantiza si está dotado de mecanismos de protección eficaces, de manera que no es dable sostener que la Carta Política garantiza los derechos colectivos si las autoridades encargadas de su protección no cumplen los deberes que les son exigibles **y si el juez no corrige eficazmente las irregularidades que lesionan principios rectores de la actividad administrativa**, conjurando oportunamente hechos u omisiones capaces de generar daños colectivos, con el fin de superarlos, restituyendo las cosas a su estado anterior, si ello resulta posible. Quiere decir, entonces que, **en atención a la naturaleza de la acción, su origen constitucional, la clase de derechos e intereses que protege y los efectos de las medidas que puede adoptar, el juez de la acción popular no limita su decisión a los hechos, pretensiones y excepciones alegadas y probadas por las partes, como se infiere de los poderes que le otorgó la Ley 472 de 1998, sino que su deber tiene que ver con la adopción de las medidas que sean necesarias para restablecer la cosas al estado precedente a la vulneración del derecho o del interés colectivo, de ser ello posible, como lo demandan los mandatos superiores bajo análisis.**

Expediente No. 25000-23-27-000-2001-0479-01  
Acumulados Nos. 2000-0428, 2001-0122, 2001-0343  
Actor: GUSTAVO MOYA ÁNGEL Y OTROS  
Acción Popular

**Aunado a lo anterior se encuentra** el artículo 357 del C.P.C. aplicable por remisión del artículo 44 de la Ley 472 de 1998, el cual consagra lo relacionado con la competencia del superior, en particular prescribe que la apelación se entiende interpuesta en lo desfavorable al apelante, y por lo tanto el superior no podrá enmendar la providencia en la parte que no fue objeto del recurso. Sin embargo, hace la salvedad que cuando ambas partes hayan apelado o la que no apeló hubiere adherido al recurso, el superior podrá resolver sin limitaciones, tal y como se presente en el caso de autos.

Ahora bien, es evidente que el carácter prevalente de estas acciones ha sido otorgado prima facie por el constituyente y el legislador. La acción goza de especial regulación y protección a la luz de los artículos 1, 88 y 94 de la Constitución, por lo que los poderes y facultades del juez constitucional se otorgan en razón a la naturaleza del instrumento y a la calidad de los derechos que se pretenden proteger.

*Tal facultad es especial únicamente por la protección a los derechos que están en juego en estas acciones. La Acción Popular tiene un carácter especial que la diferencia de todas las demás acciones, idea que se ha establecido por el legislador desde el momento de creación de la ley de acciones populares. Es por el carácter público de tal acción y por el derecho colectivo que busca su protección que se configura tal singularidad. La acción popular no configura una litis ordinaria sino que dado su carácter preponderante tiene*

Expediente No. 25000-23-27-000-2001-0479-01  
Acumulados Nos. 2000-0428, 2001-0122, 2001-0343  
Actor: GUSTAVO MOYA ÁNGEL Y OTROS  
Acción Popular

*un derecho colectivo que implica a toda la comunidad que busca su protección.*

De ahí que se analizarán no solo los puntos de discordancia de la decisión de instancia contenidos en los recursos de alzada, sino que además se formulará un plan dirigido a la efectiva realización del fin último antes mencionado.

En este contexto, es indispensable considerar previamente que la gestión del agua es actualmente considerada, desde una perspectiva mundial, como un derecho humano y, por lo tanto, como un bien de uso común y no como un elemento aislado sujeto al manejo de determinadas autoridades sin relación alguna con todas las demás actividades tanto de los diferentes ecosistemas como de los antroposistemas.

Es entonces allí donde surge la imperiosa necesidad de una actuación conjunta entre las autoridades que tienen competencia para el manejo, ordenación y gestión, además para la toma de decisiones y su financiamiento, y aquellas que tienen a su cargo la planeación de las diferentes actividades antrópicas, todo ello con miras a lograr la referida gestión integral que mediante este proveído se dispondrá.

Resulta relevante mencionar que el tema debe tratarse desde la perspectiva de que el río no sólo es un sistema hídrico integrado por subsistemas, sino que cada uno de los subsistemas tiene unos contextos diferentes, caracterizados por factores físicos, bióticos y socio-económicos, por lo cual la articulación de las soluciones

Expediente No. 25000-23-27-000-2001-0479-01  
Acumulados Nos. 2000-0428, 2001-0122, 2001-0343  
Actor: GUSTAVO MOYA ÁNGEL Y OTROS  
Acción Popular

a esos problemas diferentes en cada contexto deben confluir en un manejo integral de la problemática del río, con una visión macrosistémica: i) diagnóstico de cada una de las subcuencas; ii) Conceptos: Principios de precaución y sostenibilidad; ciclo hidrológico, sistema hídrico; ecosistema; calidad del agua; uso adecuado y racional del agua; manejo de residuos sólidos; producción más limpia; ordenación y uso de suelos; función social de la propiedad; caudal ambiental y ecológico; educación ambiental; entre otros.

Una visión compleja debe conducir a la elaboración de una política suprainstitucional y suprasectorial, lo que se tiene que ver reflejado en la estructura para la gestión del macrosistema, que dé cuenta de los principales actores de cada parte de la cuenca para con ellos conformar el comité de verificación y las acciones inmediatas de corto, mediano y largo plazo, posibles, medibles, valorables y auditables frente a cada subsistema y los mecanismos correspondientes, todo lo cual converge en la necesidad de una gerencia de cuenca que cuente con los instrumentos de gestión económicos y jurídicos no solo para una medición constante del proceso de descontaminación con indicadores de verificación, sino para solucionar los principales problemas que se han detectado en la misma.

Debe pensarse también en un mecanismo de participación ciudadana como un comité por subsistema de cuenca (alta, media y baja), que contribuya en la construcción de conocimiento para la gestión de los tres subsistemas, que verifique y revise periódicamente las actividades de

Expediente No. 25000-23-27-000-2001-0479-01  
Acumulados Nos. 2000-0428, 2001-0122, 2001-0343  
Actor: GUSTAVO MOYA ÁNGEL Y OTROS  
Acción Popular

acuerdo con las prioridades que se van estableciendo (en condiciones normales y anormales); así como proponer planes para superar los problemas o llevarlos a su mínima expresión.

Según Aude Farinetti<sup>91</sup>, el funcionamiento solidario de los componentes de un hidrosistema fluvial ha conducido a los actores competentes en el dominio del agua a racionalizar sus intervenciones sentándolas sobre el territorio más apropiado.<sup>92</sup> El movimiento así operado toca tanto a los propietarios ribereños como a los Estados, de manera que se amplía el territorio de intervención más allá del que dictaba el funcionamiento del curso del agua. De allí resulta la creación de instancias que adoptan como campo de competencia territorial entidades hidrográficas. Éstas se han creado con el fin de remediar la inadaptación de las estructuras administrativas generalistas o la intervención de los particulares en los asuntos ligados a la gestión de los cursos de agua y de actuar más eficazmente que estos últimos.

Asimismo, se asiste a un doble movimiento, tanto descentralizador<sup>93</sup>, como recentralizador: de una parte los actores locales se reagrupan en instancias competentes a una escala que pueda ir de la sub-cuenca a la cuenca, y de otra parte, el Estado crea instancias infra o inter-estatales cuya competencia se ejerce a una escala que va

---

<sup>91</sup> Farinetti Aude "La protection juridique des cours d'eau" Paris, Editions Johanet, 2012

<sup>92</sup> Existe una organización destinada a organizar los intercambios entre los diferentes organismos de cuenca, llamado RIOB (Red Internacional de Organismos de Cuenca) disponible en: <http://www.riob.org/>

<sup>93</sup> Esta voluntad se traduce en la ampliación de las competencias de las colectividades locales en la materia.

Expediente No. 25000-23-27-000-2001-0479-01  
Acumulados Nos. 2000-0428, 2001-0122, 2001-0343  
Actor: GUSTAVO MOYA ÁNGEL Y OTROS  
Acción Popular

desde la cuenca internacional, en caso dado, hasta el agrupamiento de cuencas.

No se trata aquí de repetir los numerosos desarrollos que conciernen a la descripción de las instancias de la gestión del agua, sino de anotar que el derecho se ha adaptado a la complejidad del funcionamiento del hidrosistema fluvial por la conformación de autoridades de cuenca cuyo campo de aplicación territorial, pero también la naturaleza jurídica, son extremadamente variados.

Sobre los factores de éxito en la recuperación de los cursos de agua, vale la pena destacar el informe presentado por la UNESCO en el 2009<sup>94</sup>. Este documento recopila una serie de casos en términos de conclusiones, preocupaciones y lecciones aprendidas, de estudios realizados en cerca de 60 cuencas, subcuencas y acuíferos. Dicho estudio arroja como conclusión que los puntos críticos mencionados en la mayoría de los casos revisados son:

1. La posibilidad de tener acceso y compartir el conocimiento científico confiable.
2. Apoyo y construcción de instituciones adecuadas en los niveles local, regional y nacional, entendiendo por instituciones el conjunto de reglas,

---

<sup>94</sup>Kennedy Keith, Simonovic Slobodan, Tejada-Guibert Alberto, de França Doria Miguel and Martin José Luis, "IWRM Implementation in basins, sub-basins and aquifers: State of the Art Review" International Hydrological Programme of UNESCO, 2009. Disponible en: <http://unesdoc.unesco.org/images/0018/001817/181790e.pdf>

Expediente No. 25000-23-27-000-2001-0479-01  
Acumulados Nos. 2000-0428, 2001-0122, 2001-0343  
Actor: GUSTAVO MOYA ÁNGEL Y OTROS  
Acción Popular

procedimientos de toma de decisiones, y programas que definan los roles sociales de los participantes en dichas prácticas y guíen las interacciones entre los actores.

3. Compromiso de los afectados.

4. Mecanismos de resolución de conflictos.

5. Voluntad Política.

6. La necesidad de capacidad de desarrollo como complemento de la planeación y la acción.

7. La importancia de comprender los aspectos económicos y financieros.

8. La aplicación en el tiempo adecuado.

9. El rol de las asociaciones y los grupos informales.

Adicionalmente, los temas que aparecen en las conclusiones y recomendaciones de tres de los casos analizados en el documento citado son:

1. Las organizaciones deben ser capaces de autofinanciarse.

2. Deben evaluarse los usos actuales y la implementación de alternativas.

Expediente No. 25000-23-27-000-2001-0479-01  
Acumulados Nos. 2000-0428, 2001-0122, 2001-0343  
Actor: GUSTAVO MOYA ÁNGEL Y OTROS  
Acción Popular

3. Un problema local importante (crisis, conflicto, desastre natural) suele convertirse en el punto de partida.
4. El uso de métodos existentes puede facilitar el proceso.
5. La cooperación debe estar ligada a la economía.
6. La conservación y las áreas protegidas son importantes para la biodiversidad.
7. Los intermediarios pueden jugar un papel importante en el proceso.
8. El compromiso de las comunidades locales es un aspecto crítico.

Tres conclusiones adicionales se derivan de los estudios mencionados:

1. Las investigaciones y estudios ayudan a proporcionar legitimidad y acceso a los agentes involucrados.
2. La protección es una aproximación más beneficiosa que la reparación
3. La biodiversidad deberá tomarse en cuenta.

En Colombia, en el informe de auditoría especial sobre el Río Bogotá<sup>95</sup>, que en general es válido para la mayor parte

---

<sup>95</sup>“Auditoría Especial a la Gestión sobre el Río Bogotá”, Contraloría General de la República de Colombia, febrero de 2013.

Expediente No. 25000-23-27-000-2001-0479-01  
Acumulados Nos. 2000-0428, 2001-0122, 2001-0343  
Actor: GUSTAVO MOYA ÁNGEL Y OTROS  
Acción Popular

del país, se dice que "pese a la existencia de un documento de política económica y social para el río Bogotá, Conpes 3320 de 2003, y de la formulación en el año 2010 de la Política Nacional de Gestión del Recurso Hídrico (PNGRH) (el cual plantea el reto de garantizar la sostenibilidad del recurso, entendiendo que su gestión se deriva del ciclo hidrológico que vincula una cadena de interrelaciones entre diferentes componentes naturales y antrópicos en la que el manejo del agua debe ser abordado como una estrategia de carácter nacional desde una perspectiva ambiental e integral, contemplando la diversidad regional y las potencialidades de la participación de actores sociales e institucionales), su implementación aún no se ha dado. Lo anterior se debe al incumplimiento por parte de los órganos rectores de políticas públicas, autoridades, entes encargados de planeación y vigilancia, y demás órganos responsables de generar directrices y lineamientos en aras de cumplir los objetivos trazados, (lo que debería generar información de la línea base, estrategias conjuntas, metodologías y protocolos de intervención, así como la definición y priorización precisa de los programas y proyectos, con el correspondiente monitoreo y seguimiento, liderando y apoyando técnicamente la implementación del accionar del Estado formulado).

Desde la perspectiva ecológica<sup>96</sup>, es importante además distinguir, de una parte las nociones de procesos y funciones de los ecosistemas y de otra parte la de

---

<sup>96</sup> Aronson James, "Regard d'un écologue sur la proposition de Nomenclature des préjudices environnementaux", en Neyret Laurent y Martín Gilles J. "Nomenclature des préjudices environnementaux" L.G.D.J. Lextenso éditions, París 2012.

Expediente No. 25000-23-27-000-2001-0479-01  
Acumulados Nos. 2000-0428, 2001-0122, 2001-0343  
Actor: GUSTAVO MOYA ÁNGEL Y OTROS  
Acción Popular

servicios o bienes y servicios que los sistemas naturales y culturales proporcionan a los humanos. Esta distinción entre funciones y servicios permite la articulación de las ciencias naturales, con las ciencias sociales y el derecho, que se relacionan con los ecosistemas y el ambiente.

No obstante, si bien es importante en cada disciplina nombrar las cosas con las palabras apropiadas a su naturaleza, es aún más importante encontrar un lenguaje común que permita que las diferentes disciplinas y culturas trabajen en conjunto. Cada vez con mayor frecuencia los daños sufridos por el ambiente y más concretamente por los ecosistemas y causados por la acción humana, se abordan con un análisis multicriterios, esto es, con una mirada a la vez económica, social y ecológica. Sin embargo, son los aspectos ecológicos los que representan la base *sine qua non* de nuestras sociedades y de nuestra economía en el planeta tierra.

Por lo anterior, se ha de buscar una manera de ilustrar la dinámica de la estructura y el funcionamiento de los ecosistemas involucrados, así como la diferencia entre las funciones y servicios prestados a los humanos por los ecosistemas. Los servicios son, en efecto, las cosas útiles que los ecosistemas proporcionan a la humanidad directa o indirectamente. Por su parte las funciones de un ecosistema constituyen el entramado necesario, a nivel del ecosistema, para que opere la provisión de servicios. Las funciones pueden ser evaluadas, por ejemplo por los ecólogos, sin referencia alguna a los hombres. Ello no ocurre igual en el caso de los servicios, pues quien dice

Expediente No. 25000-23-27-000-2001-0479-01  
Acumulados Nos. 2000-0428, 2001-0122, 2001-0343  
Actor: GUSTAVO MOYA ÁNGEL Y OTROS  
Acción Popular

servicio evoca necesariamente los beneficiarios y los valores percibidos por los hombres, sin perjuicio de que los servicios proporcionados por los ecosistemas y las funciones se miren considerando que se encuentran íntimamente ligados.

Para visualizar las relaciones en cascada entre estructura, procesos y funciones de los ecosistemas de un lado y los servicios que ellos proporcionan a la humanidad, de otro lado se presenta la siguiente figura:

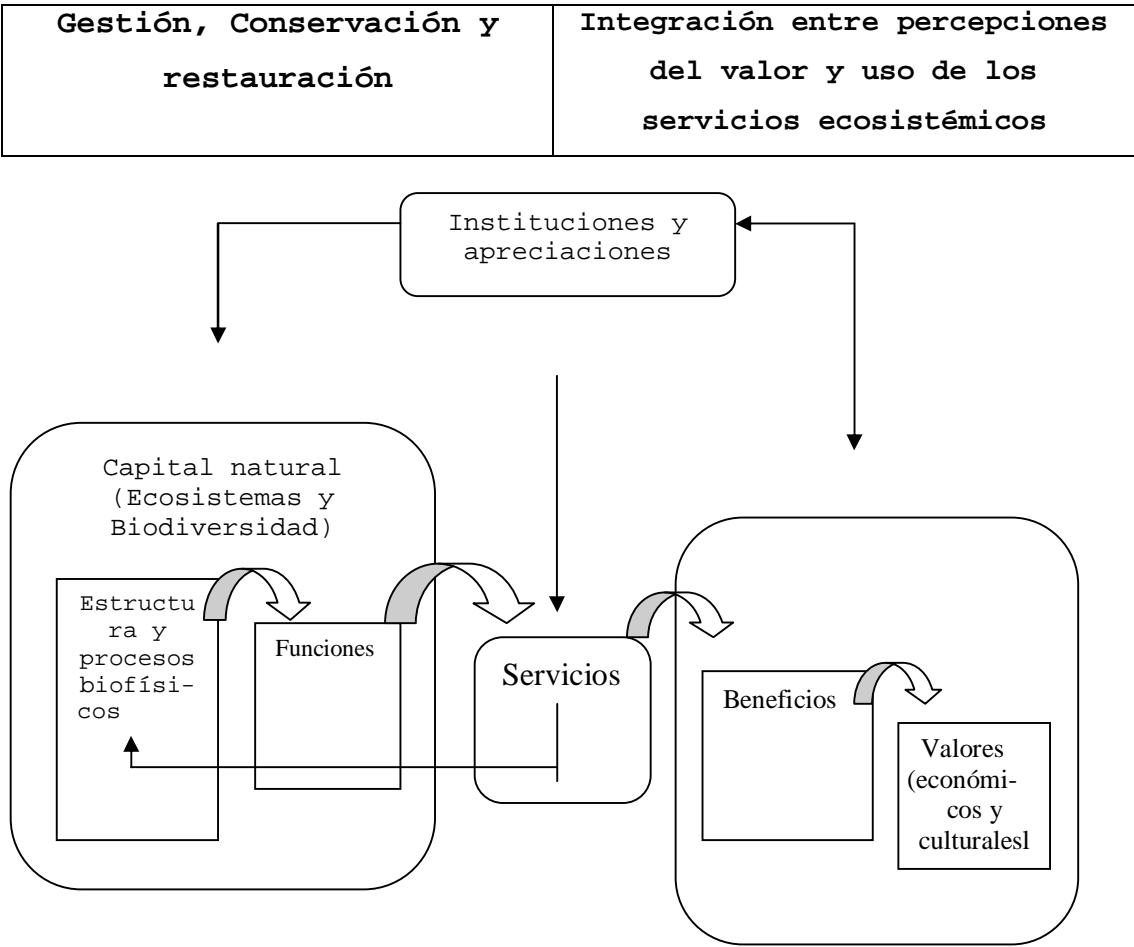

Tampoco debe olvidarse que numerosos sistemas ecológicos se integran en otros sistemas de nivel jerárquico más elevado que constituyen en sí mismos otros sistemas. La

Expediente No. 25000-23-27-000-2001-0479-01  
Acumulados Nos. 2000-0428, 2001-0122, 2001-0343  
Actor: GUSTAVO MOYA ÁNGEL Y OTROS  
Acción Popular

imagen de las muñecas rusas describe el fenómeno adecuadamente.

Cabe anotar igualmente, que en general la biodiversidad y el funcionamiento de los ecosistemas son de hecho indisolubles, especialmente cuando se trata de lograr una verdadera restauración en lugar de una simple compensación por daños ocasionados al ambiente. El concepto de capital natural resulta entonces una mejor herramienta, que permite la comunicación y colaboración entre ecólogos, juristas, economistas, filósofos, periodistas e integrantes de otras disciplinas.

Bajo el anterior contexto, la gestión sistémica de la cuenca hidrográfica constará de varios componentes que se desarrollarán en la presente decisión, así:

I. El primer componente se refiere al mejoramiento ambiental de la cuenca hidrográfica del Río Bogotá, que parte de unas consideraciones preliminares, de la descripción hidrográfica de la cuenca del Río Bogotá, de su importancia y su problemática, y que consta a su turno de:

1. Medidas de conservación y protección del ciclo hidrológico, los ecosistemas y la biodiversidad.
2. Un plan para definir la gestión para el mejoramiento de la calidad del agua, así como para reducir las formas de contaminación del recurso hídrico.

Expediente No. 25000-23-27-000-2001-0479-01  
Acumulados Nos. 2000-0428, 2001-0122, 2001-0343  
Actor: GUSTAVO MOYA ÁNGEL Y OTROS  
Acción Popular

3. El saneamiento básico que consta de la definición del esquema de tratamiento acorde con los estudios realizados, la modelación dinámica de la calidad del agua del Río Bogotá para definir las alternativas de ubicación de la segunda planta de tratamiento, entre otros.
4. La implementación y actualización de los instrumentos de planeación y reglamentación de los usos del suelo.
5. El fortalecimiento de los instrumentos económicos y costos ambientales.
6. La implementación de instrumentos de valoración del daño ambiental.
7. La definición e implementación de instrumentos de auditoría ambiental.
8. La generación de conocimiento científico-técnico a través de la investigación como fundamento de los procesos de planificación ambiental.
9. La implementación de un observatorio ambiental.
10. La implementación de un sistema de información ambiental para la cuenca hidrográfica del Río Bogotá y el señalamiento de indicadores de gestión, evaluación y seguimiento, así como del monitoreo de los instrumentos y líneas de acción.

II. Un segundo componente referente a la coordinación y articulación institucional e intersectorial, el cual consta de los siguientes elementos:

1. La implementación de una gerencia de cuenca para la dirección y gestión con enfoque sistémico en la

Expediente No. 25000-23-27-000-2001-0479-01  
Acumulados Nos. 2000-0428, 2001-0122, 2001-0343  
Actor: GUSTAVO MOYA ÁNGEL Y OTROS  
Acción Popular

cuenca hidrográfica. Este elemento incluye la justificación de establecer una dirección unificada del manejo del hidrosistema del río, las ventajas de su constitución, el fundamento normativo, la necesidad de articular los instrumentos de planeación nacionales, regionales y locales, su naturaleza jurídica, los objetivos, sus funciones, principios orientadores, estructura operativa básica y manejo de recursos.

2. El establecimiento de un fondo cuenta encargado de recaudar y administrar los recursos que allí se describirá, respetando la autonomía de los entes que integran la gerencia de cuenca.
3. La referencia normativa y funcional que identifican la participación de los diferentes actores en la gestión integral.
4. La definición de una estrategia financiera con el objeto de precisar el origen y fuente de los recursos, forma y periodicidad del recaudo, responsables, manejo, administración, ejecución y seguimiento.

III. El tercer componente es el educativo y de participación ciudadana cuyo objeto es crear conciencia de la necesidad de proteger el recurso hídrico a través de la difusión del conocimiento con el apoyo de los establecimientos docentes y universitarios, así como de los centros de investigación científica, el reciclaje en la fuente y la producción más limpia.

Una vez desarrollado lo anterior se designará el comité de verificación y los consejos de cuenca con la

Expediente No. 25000-23-27-000-2001-0479-01  
Acumulados Nos. 2000-0428, 2001-0122, 2001-0343  
Actor: GUSTAVO MOYA ÁNGEL Y OTROS  
Acción Popular

participación de los representantes de cada una de las subcuencas (alta, media y baja), los cuales se reunirán periódicamente para rendir los informes pertinentes al juez de instancia. Dicho Comité podrá presentar las acciones populares y de cumplimiento, necesarias para exigir a las autoridades elegidas popularmente responsabilidades concretas.

Por su parte, la gerencia de cuenca consolidará el balance de la gestión de verificación de la descontaminación y el mantenimiento del hidrosistema, y revisará periódicamente los programas, planes y proyectos del río de acuerdo con las prioridades que se van estableciendo en el marco del Pomca.

Asimismo, la gerencia de cuenca dinamizará y hará seguimiento a las inversiones que realicen y deberá ocuparse de la valoración previa a un inventario de los servicios ecológicos de cada subsistema, así como de los riesgos o amenazas para obtener una base de datos que permita no solo adoptar las decisiones que se requieran sino, cuando sea el caso, determinar la existencia de un daño y establecer el posible autor del mismo, así como priorizar las actividades.

En suma, se abordará la problemática y se presentará un plan que deberá ser articulado con los demás instrumentos normativos y de planeación, para luego resolver todos y cada uno de los argumentos de alzada de las partes e impartir las órdenes respectivas. En este sentido el enfoque que se adoptada para el desarrollo de esta providencia corresponde a la de marco lógico.

Expediente No. 25000-23-27-000-2001-0479-01  
Acumulados Nos. 2000-0428, 2001-0122, 2001-0343  
Actor: GUSTAVO MOYA ÁNGEL Y OTROS  
Acción Popular

#### I.4.1 MARCO LÓGICO

El enfoque de marco lógico (EML) es una herramienta analítica, desarrollada para la planificación de la gestión de proyectos orientados a procesos. Dentro de este concepto se considera que la ejecución de un proyecto es consecuencia de un conjunto de acontecimientos con una relación causal interna. Estos se describen en: insumos, actividades, resultados, objetivos específicos y objetivos globales. Las incertidumbres del proceso se explican con los factores externos (o supuestos) en cada nivel. De modo general, se hace un resumen del proceso de desarrollo en una matriz que describe los elementos básicos antes referidos, denominada Matriz del Proyecto o Matriz de Planificación.

En estos términos, la matriz del proyecto de decisión se sintetiza en los siguientes elementos:

- Finalidad.
- Propósito.
- Componentes específicos.
- Actividades necesarias para alcanzar dichos resultados.
- Indicadores medibles para evaluar el proyecto.
- Fuentes y medios de verificación.
- Supuestos.

Expediente No. 25000-23-27-000-2001-0479-01  
Acumulados Nos. 2000-0428, 2001-0122, 2001-0343  
Actor: GUSTAVO MOYA ÁNGEL Y OTROS  
Acción Popular

| MATRIZ DE MARCO LÓGICO                                                                                                                                                                                                                                                           |                                                                            |                          |                                                                    |           |
|----------------------------------------------------------------------------------------------------------------------------------------------------------------------------------------------------------------------------------------------------------------------------------|----------------------------------------------------------------------------|--------------------------|--------------------------------------------------------------------|-----------|
| <p><b>FINALIDAD</b></p> <p>Recuperación de la cuenca hidrográfica del Río Bogotá para el mejoramiento continuo y sostenible de la calidad de vida de los habitantes.</p>                                                                                                         |                                                                            |                          |                                                                    |           |
| <p><b>PROPÓSITO</b></p> <p>Gestionar en un marco sistémico la Cuenca Hidrográfica del Río Bogotá a través de la integración y combinación de elementos ambientales, sociales, económicos e institucionales.</p>                                                                  |                                                                            |                          |                                                                    |           |
| <p><b>COMPONENTES</b></p> <p>I) Mejoramiento Ambiental y Social de la Cuenca Hidrográfica del Río Bogotá</p> <p>II) Articulación y Coordinación Institucional, Intersectorial y Económica</p> <p>III) Profundización de los Procesos Educativos y de Participación Ciudadana</p> |                                                                            |                          |                                                                    |           |
| <p>COMPONENTE I: MEJORAMIENTO AMBIENTAL Y SOCIAL DE LA CUENCA HIDROGRÁFICA DEL RÍO BOGOTÁ</p>                                                                                                                                                                                    |                                                                            |                          |                                                                    |           |
| OBJETIVOS ESPECÍFICOS                                                                                                                                                                                                                                                            | ACTIVIDADES                                                                | INDICADORES VERIFICABLES | FUENTES Y MEDIOS DE VERIFICACIÓN                                   | SUPUESTOS |
| Conservar y proteger los procesos hidrológicos ecosistemas y biodiversidad                                                                                                                                                                                                       | Conservación y protección de las áreas de manejo; de las zonas de especial |                          | Informes Consejos de Cuenca, comité de verificación, autoridades e |           |

Expediente No. 25000-23-27-000-2001-0479-01  
Acumulados Nos. 2000-0428, 2001-0122, 2001-0343  
Actor: GUSTAVO MOYA ÁNGEL Y OTROS  
Acción Popular

|                                                                                     |                                                                                                                                                                                                                                                                                       |  |                                                                                                                 |  |
|-------------------------------------------------------------------------------------|---------------------------------------------------------------------------------------------------------------------------------------------------------------------------------------------------------------------------------------------------------------------------------------|--|-----------------------------------------------------------------------------------------------------------------|--|
|                                                                                     | importancia ; de ecosistemas ; de fauna y flora; de Humedales; de las fuentes abastecimiento garantizando la disponibilidad de agua potable                                                                                                                                           |  | instituciones con competencia y jurisdicción                                                                    |  |
| Mejorar la calidad del agua, mitigar y reducir la contaminación del recurso hídrico | Adopción, modificación y actualización de Planes Maestro de Acueducto y Alcantarillado - PMAA; de Planes de Saneamiento y Manejo de Vertimientos - PSMV; de Planes de Gestión de Residuos Sólidos.<br><br>Manejo y control de los residuos de la actividad industrial y Agropecuaria. |  | Informes Consejos de Cuenca, comité de verificación, autoridades e instituciones con competencia y jurisdicción |  |

Expediente No. 25000-23-27-000-2001-0479-01  
Acumulados Nos. 2000-0428, 2001-0122, 2001-0343  
Actor: GUSTAVO MOYA ÁNGEL Y OTROS  
Acción Popular

|                                                                                   |                                                                                                                                                                                                                                                                                                                              |  |                                                                                                                    |  |
|-----------------------------------------------------------------------------------|------------------------------------------------------------------------------------------------------------------------------------------------------------------------------------------------------------------------------------------------------------------------------------------------------------------------------|--|--------------------------------------------------------------------------------------------------------------------|--|
|                                                                                   | Fomento de actividades de producción más limpia.<br><br>Fortalecimiento de la red de monitoreo                                                                                                                                                                                                                               |  |                                                                                                                    |  |
| Propender por la implementación y mejora de las condiciones de saneamiento básico | Definición del esquema de tratamiento .<br>Definición de la ubicación de la segunda planta de tratamiento<br><br>Definición del nivel de tratamiento<br><br>Construcción, optimización y estandarización de las Plantas Municipales<br><br>Construcción de Colectores<br><br>Construcción de Interceptores<br><br>Conexiones |  | Informes<br>Consejos de Cuenca, comité de verificación, autoridades e instituciones con competencia y jurisdicción |  |

Expediente No. 25000-23-27-000-2001-0479-01  
Acumulados Nos. 2000-0428, 2001-0122, 2001-0343  
Actor: GUSTAVO MOYA ÁNGEL Y OTROS  
Acción Popular

|                                                                                                |                                                                                                                |  |                                                                                                                 |  |
|------------------------------------------------------------------------------------------------|----------------------------------------------------------------------------------------------------------------|--|-----------------------------------------------------------------------------------------------------------------|--|
|                                                                                                | Erradas                                                                                                        |  |                                                                                                                 |  |
|                                                                                                | Rehabilitación de redes                                                                                        |  |                                                                                                                 |  |
| Implementar y actualizar los instrumentos de planeación y reglamentación de los usos del suelo | Modificación y articulación de instrumentos normativos y de planificación. Ordenación territorial de la cuenca |  | Informes Consejos de Cuenca, comité de verificación, autoridades e instituciones con competencia y jurisdicción |  |
| Fortalecer los instrumentos económicos                                                         | Modificación de los parámetros de las tasas de uso y retributivas                                              |  |                                                                                                                 |  |
| Definir e implementar instrumentos de auditoría ambiental                                      | Implementación de procedimientos de auditoría ambiental                                                        |  | Informe de la Gerencia Estrategia de la Cuenca Hidrográfica - GECH                                              |  |
| Definir e implementar instrumentos de valoración del daño ambiental                            | Implementación de procedimientos de valoración del daño ambiental                                              |  | Informe de la Gerencia Estrategia de la Cuenca Hidrográfica - GECH                                              |  |
| Generar conocimiento científico -                                                              |                                                                                                                |  | Informes Consejos de Cuenca,                                                                                    |  |

Expediente No. 25000-23-27-000-2001-0479-01  
Acumulados Nos. 2000-0428, 2001-0122, 2001-0343  
Actor: GUSTAVO MOYA ÁNGEL Y OTROS  
Acción Popular

|                                                                                                     |                                                      |                                    |                                                                                    |                                         |
|-----------------------------------------------------------------------------------------------------|------------------------------------------------------|------------------------------------|------------------------------------------------------------------------------------|-----------------------------------------|
| técnico a través de la investigación                                                                |                                                      |                                    | comité de verificación, autoridades e instituciones con competencia y jurisdicción |                                         |
| Implementar un observatorio ambiental                                                               | Implementación de un observatorio regional ambiental |                                    | Informe de la Gerencia Estrategia de la Cuenca Hidrográfica - GECH                 |                                         |
| Implementar un sistema de información ambiental                                                     | Implementación de un sistema regional de información |                                    | Informe de la Gerencia Estrategia de la Cuenca Hidrográfica - GECH                 |                                         |
| COMPONENTE II: ARTICULACIÓN Y COORDINACIÓN INSTITUCIONAL, INTERSECTORIAL Y ECONÓMICA                |                                                      |                                    |                                                                                    |                                         |
| OBJETIVOS ESPECÍFICOS                                                                               | ACTIVIDADES                                          | INDICADORES VERIFICABLES           | FUENTES Y MEDIOS DE VERIFICACIÓN                                                   | SUPUESTOS                               |
| Articular, coordinar y aunar esfuerzos institucionales para la integración sistémica y construcción | Constituir la Gerencia Estratégica de Cuenca - GECH  | Índice de evaluación del desempeño | El Comité de Verificación hace el seguimiento a la integración de la gerencia y    | Referente normativo sirva de fundamento |

Expediente No. 25000-23-27-000-2001-0479-01  
Acumulados Nos. 2000-0428, 2001-0122, 2001-0343  
Actor: GUSTAVO MOYA ÁNGEL Y OTROS  
Acción Popular

|                                                                                                                                                                                                                         |                                                                                                                                                                                                              |                                                                                                                                          |                                                                                 |                                                                                                                                                                                                                               |
|-------------------------------------------------------------------------------------------------------------------------------------------------------------------------------------------------------------------------|--------------------------------------------------------------------------------------------------------------------------------------------------------------------------------------------------------------|------------------------------------------------------------------------------------------------------------------------------------------|---------------------------------------------------------------------------------|-------------------------------------------------------------------------------------------------------------------------------------------------------------------------------------------------------------------------------|
| colectiva hacia una solución sostenible para la Cuenca Hidrográfica del río Bogotá                                                                                                                                      |                                                                                                                                                                                                              |                                                                                                                                          | a la expedición de su reglamento                                                |                                                                                                                                                                                                                               |
| Comprometer a las entidades públicas y autoridades ambientales del orden nacional, departamental, regional, municipal y distrital para obtener los recursos necesarios para financiar la gestión integral de la cuenca. | Identificar las fuentes de financiación y los responsables de su recaudo. Cumplir compromisos financieros asumidos. Priorizar la asignación de recursos. Definir inversiones a corto, mediano y largo plazo. | Recursos apropiados frente a recursos requeridos<br><br>Recursos recaudados frente a recursos invertidos<br><br>Identificación de riesgo | Seguimiento de la ejecución y recaudo oportuno de los recursos                  | Constitución de un Fondo Común de Cofinanciación. Optimización de las fuentes existentes y diligenciamiento para obtener otras fuentes de recursos. Supone articulación de recursos con el respeto de la autonomía financiera |
| Manejar en conjunto y de manera coordinada el ordenamiento de la Cuenca Hidrográfica                                                                                                                                    | Referencias normativas y cuadro de responsabilidades                                                                                                                                                         | Tareas asignadas frente a tareas ejecutadas                                                                                              | Reportes periódicos a la autoridad e Cuenca y registro en el Sistema de Gestión | Conocimiento de las competencias administrativas y de                                                                                                                                                                         |

Expediente No. 25000-23-27-000-2001-0479-01  
Acumulados Nos. 2000-0428, 2001-0122, 2001-0343  
Actor: GUSTAVO MOYA ÁNGEL Y OTROS  
Acción Popular

|                                                                                               |                                                                                                                                 |                                                                        |                                                                                                                                                              |                                                           |
|-----------------------------------------------------------------------------------------------|---------------------------------------------------------------------------------------------------------------------------------|------------------------------------------------------------------------|--------------------------------------------------------------------------------------------------------------------------------------------------------------|-----------------------------------------------------------|
| con la intervención de todos sus actores a través de un Plan de Gestión Integral              |                                                                                                                                 |                                                                        | e<br>Información<br>Divulgación<br>medios<br>amplia<br>circulación<br>Evaluación,<br>monitoreo y<br>seguimiento<br>definir<br>prioridades<br>de<br>inversión | recaudo<br>de<br>recursos                                 |
| Lograr la integración y articulación de los instrumentos de Planeación con criterio Regional. | Identificar los instrumentos de planeación del orden nacional, regional y municipal para realizar su integración y articulación |                                                                        | Jerarquizar los instrumentos de planeación e integrarlos con criterio de regionalización                                                                     | Compromiso institucional                                  |
| COMPONENTE III: Profundización en Procesos de Educación y Participación Ciudadana             |                                                                                                                                 |                                                                        |                                                                                                                                                              |                                                           |
| OBJETIVOS ESPECÍFICOS                                                                         | ACTIVIDADES                                                                                                                     | INDICADORES VERIFICABLES                                               | FUENTES Y MEDIOS DE VERIFICACIÓN                                                                                                                             | SUPUESTOS                                                 |
| Promover la concertación planeación, ejecución y evaluación conjunta a nivel                  | Ordenar a las entidades competentes la inclusión de los                                                                         | PROCEDAS formulados problemática cuenca frente a su puesta en marcha y | Reporte del PROCEDA elaborado a la Gerencia Estratégic                                                                                                       | Acuerdos previos, coordinación y compromiso institucional |

Expediente No. 25000-23-27-000-2001-0479-01  
Acumulados Nos. 2000-0428, 2001-0122, 2001-0343  
Actor: GUSTAVO MOYA ÁNGEL Y OTROS  
Acción Popular

|                                                                                                                                                                                                                                                                                                                                                           |                                                                                                                                                                                                                                                           |                                                                                                                                                                                                                                                |                                                                                                                                     |                                                                                         |
|-----------------------------------------------------------------------------------------------------------------------------------------------------------------------------------------------------------------------------------------------------------------------------------------------------------------------------------------------------------|-----------------------------------------------------------------------------------------------------------------------------------------------------------------------------------------------------------------------------------------------------------|------------------------------------------------------------------------------------------------------------------------------------------------------------------------------------------------------------------------------------------------|-------------------------------------------------------------------------------------------------------------------------------------|-----------------------------------------------------------------------------------------|
| intersectorial e interinstitucional de planes, programas, proyectos, y estrategias de educación ambiental a nivel de la Cuenca-                                                                                                                                                                                                                           | programas educativos en sus programas educativos de manera articulada                                                                                                                                                                                     | efectividad                                                                                                                                                                                                                                    | a de Cuenca                                                                                                                         | onal                                                                                    |
| Proporcionar un marco conceptual y metodológico que oriente las acciones que se requieren para producción más limpia y manejo de residuos sólidos a través de procesos participativos, instalación de capacidades técnicas y consolidación de la institucionalización para la construcción de una cultura ética y responsable del manejo sostenible de la | Establecer programas de acuerdo con la actividad económica o industrial de Producción más limpia Incluir en los POT los Planes de Manejo de Residuos Sólidos El reciclaje en la fuente, capacitación a través de programas educativos de amplia difusión. | Programas de Producción más Limpia efectivamente implementados PMVRS incluidos efectivamente en los POT Programas educativos de reciclaje en la fuente en educación formal e informal, campañas educativas realizadas para educar en reciclaje | Reportes a la autoridad de Cuenca por las autoridades de educación y ambientales, así como el departamento de Cundinamarca y la CAR | Compromiso institucional y cumplimiento de las disposiciones consagradas en la Ley 1495 |

Expediente No. 25000-23-27-000-2001-0479-01  
Acumulados Nos. 2000-0428, 2001-0122, 2001-0343  
Actor: GUSTAVO MOYA ÁNGEL Y OTROS  
Acción Popular

|                                                                                                                                                                   |                                                                                                          |                                                                          |                                                                                        |                                                                                |
|-------------------------------------------------------------------------------------------------------------------------------------------------------------------|----------------------------------------------------------------------------------------------------------|--------------------------------------------------------------------------|----------------------------------------------------------------------------------------|--------------------------------------------------------------------------------|
| cuenca.                                                                                                                                                           |                                                                                                          |                                                                          |                                                                                        |                                                                                |
| Adoptar las estrategias que permitan incorporar la educación ambiental como eje transversal para el mejoramiento continuo de sus habitantes                       | Revisar los PRAES y PRAUS por el Ministerio de Educación y las Secretarías de Educación correspondientes | PRAES y PRAUS incluidos en la educación formal y no formal               | Reporte a la Gerencia de Cuenca a través de la autoridad competente para su desarrollo | Compromiso institucional y de la comunidad educativa.                          |
| Proporcionar instrumentos que permitan abrir espacios para la reflexión crítica                                                                                   | Transferencia del conocimiento                                                                           | Adopción de estudios efectuados por la academia en la toma de decisiones | Gestión del Observatorio ORARBO                                                        | Aportes y análisis académicos allegados oportunamente a la Gerencia de Cuenca. |
| Vincular a la Academia y los establecimientos o instituciones educativas así como a las Organizaciones no gubernamentales ambientales en los procesos educativos. | Efectividad de los instrumentos para la EA y participación en la propuesta de soluciones                 | Resultados de la educación frente al problema                            | Gestión del Observatorio ORARBO                                                        | Actividad proactiva por parte de la Academia                                   |
| Vincular a la población de la cuenca en general en los procesos de                                                                                                | Comités de Cuenca e integración a los diferentes sectores                                                | Participación efectiva de la comunidad en la toma de decisiones          | Integración de los Comités de Cuenca para la participac                                | Actitud proactiva de la comunidad en la problemát                              |

Expediente No. 25000-23-27-000-2001-0479-01  
Acumulados Nos. 2000-0428, 2001-0122, 2001-0343  
Actor: GUSTAVO MOYA ÁNGEL Y OTROS  
Acción Popular

|              |                    |  |                        |      |
|--------------|--------------------|--|------------------------|------|
| aprendizaje- | de la<br>población |  | ión de la<br>comunidad | ica. |
|--------------|--------------------|--|------------------------|------|

**I.4.2. ACERVO PROBATORIO**

Tanto para la adopción del plan de gestión de esta Corporación al cual se hizo referencia líneas atrás como para la resolución de los recursos de apelación, la Sala resalta que se ha tenido en cuenta el material probatorio obrante en el expediente y que se relaciona a continuación:

**PRIMERA INSTANCIA**

**CUADERNOS DEL PROCESO RADICADO AP-479**

- Proyectos Pacto de cumplimiento EAAB- Plan de Inversiones- Escenario Resoluciones CRA.
- CAR-Estudio de factibilidad para la construcción de la Planta de Tratamiento doméstica Municipio de Villapinzón en desarrollo del Programa CAR-BID.
- Programa de mejoramiento del Río Bogotá. Municipio de Suesca.
- Propuesta Pacto de Cumplimiento: Cajicá, STANTON y CIA S.A., SOFASA u otros.
- Ministerio de Protección Social- Propuesta frente a la problemática de Saneamiento del río Bogotá.
- Adición Pacto de Cumplimiento (Municipio de Facatativá).Ministerio del Medio Ambiente.
- Adición Pacto de Cumplimiento (Municipio de Mosquera, Cota, EEB y EMGESA, Soacha, Tocancipá, Andina S.A., Departamento de Cundinamarca, Chía,

Expediente No. 25000-23-27-000-2001-0479-01  
 Acumulados Nos. 2000-0428, 2001-0122, 2001-0343  
 Actor: GUSTAVO MOYA ÁNGEL Y OTROS  
 Acción Popular

Funza, Sopó, EMGESA, Ministerio Ambiente, EMCOCABLES, CAR).

- "Proyecto Recuperación y Protección de Nacimientos Zonas de Ronda en Instalación de Cercas Vivas para el Municipio de Tenjo -del Río Chicú".
- Cuaderno principal -Planos, Cuadros, Tablas y Esquemas del Municipio de Soacha.
- Gobernación de Cundinamarca- Tribunal Administrativo de Cundinamarca. Mayo 2003.

#### **CUADERNOS DEL PROCESO RADICADO AP-01-343**

- CAR- Informe Técnico de funcionamiento de la Planta de Tratamiento de Aguas Residuales del Municipio de Sopó. Julio 1998- Consorcio GelperEssere Ltda.
- CAR- "Proyecto, diseño y construcción y puesta en marcha Planta de tratamiento de Sopó II y entrega PTAR SOPO I".
- Acuerdo 009 del 2001: "Plan de desarrollo vigencia 2001-2003-Concejo Municipal Sopó".

#### **PROYECTO DE PACTOS:**

- Pacto Emcocables en reestructuración.
- Pacto Stanton y CIA S.A.
- Pacto Ministerio de Agricultura Y Desarrollo Rural.
- Pacto del Municipio de Funza.
- Pacto del Municipio de Sopó, Villapinzón, Chocontá, Soacha, IDEAM, Ministerio de Comercio, Industria y Turismo, Alpina S.A. y Chany, Mosquera Asociados.
- Mejoramiento Ambiental en el embalse de Muña.

Expediente No. 25000-23-27-000-2001-0479-01  
Acumulados Nos. 2000-0428, 2001-0122, 2001-0343  
Actor: GUSTAVO MOYA ÁNGEL Y OTROS  
Acción Popular

- CAR- Diagnóstico ambiental Legalización de las Industrias del Cuero Diciembre 1999.
- Resumen ejecutivo- Diagnóstico ambiental y legalización de las industrias del curtido de Pieles fase II.
- Descontaminación Río Bogotá- Municipio de Soacha.
- Sociedad geográfica de Colombia-Gobernación de Cundinamarca -Cuenca Alta del Río Bogotá- Región Programa Plan de Ordenamiento Territorial.
- Anexo de Miguel Ángel Chávez Chávez y otros: Estudios fisicoquímicos de la calidad del agua del Río Bogotá del año 1958 a 1967-FUNDACION VERDE-VIVO.
- Anexo de Miguel Ángel Chávez Chávez y otros- Segundo encuentro de Ríos, Lagos y Lagunas de Colombia y del Mundo. -FUNDACION VERDE-VIVO.
- CAR.- Diagnóstico ambiental Legalización de las Industrias del Cuero Diciembre 1999, Programa de Monitoreo de la Calidad del agua del Río Bogotá desde el Municipio de Villapinzón hasta la planta de tratamiento de Tibitoc y Heliografía del Proyecto Diagnóstico Ambiental y Legalización de las Industrias de Curtido de Pieles en los Municipios de Villapinzón y Chocontá.
- CAR- Puntos de muestreo de calidad del Río Bogotá desde el Municipio de Villapinzón hasta la planta de de tratamiento de Tibitoc.
- CAR- Gráficas de los comportamientos de los parámetros pH- Oxígeno disuelto- DBO5 - DQO-CROO- ACEITES Y GRASAS.
- CAR- Registro Fotográfico.

Expediente No. 25000-23-27-000-2001-0479-01  
Acumulados Nos. 2000-0428, 2001-0122, 2001-0343  
Actor: GUSTAVO MOYA ÁNGEL Y OTROS  
Acción Popular

- CAR -Mapa-Localización de vertimientos Industriales.
- CAR- Programa de monitoreo de la calidad del RB, desde Municipio de Villapinzón, hasta la Planta de Tratamiento de Tibitoc.
- Copia de los actos administrativos expedidos por la CAR a través de la Dirección Regional de Sabana Norte y Almeydas, en relación con el otorgamiento de permisos de vertimiento o concesiones de agua en la cuenca alta del RB, durante los años 2000 y 2001.
- CAR - Cuadros en los que se relacionan todas las concesiones de agua en la cuenca alta del río Bogotá, indicando el nombre del peticionario, la información del predio, el uso, la fuente de abastecimiento, el tipo de concesión, el número de expediente, el número, y la fecha de la resolución y el término de vigencia de la concesión.
- CAR- Cuadros en los que se relacionan todos los vertimientos detectados en la cuenca alta del río RB y el número del expediente con el que se tramitan.
- CAR- Cuadros de análisis bacteriológicos y fisicoquímico de aguas crudas y aguas tratadas, planta Tibitoc.
- CAR-Actualización del análisis del comportamiento temporal y espacial de la cuenca media y baja del RB (1999).
- CAR-Informe final del programa de aforo y muestreo del RB y sus principales afluentes (1996).

Expediente No. 25000-23-27-000-2001-0479-01  
Acumulados Nos. 2000-0428, 2001-0122, 2001-0343  
Actor: GUSTAVO MOYA ÁNGEL Y OTROS  
Acción Popular

- CAR-Informe final de la actualización del análisis del comportamiento temporal y espacial de la cuenca alta, media y baja del RB (2000).
- CAR- Informe de monitoreo del programa de saneamiento ambiental de la cuenca alta del RB (1996).
- CAR- Proyecto para el desarrollo de un programa integral de recuperación ambiental y desarrollo industrial de la zona de Villapinzón y Chocontá (resumen ejecutivo) Conclusiones y recomendaciones de la visita a las curtiembres de Villapinzón y Chocontá por el programa de Asesores Holandeses (1995).
- CAR-Informe de monitoreo del programa de saneamiento ambiental de la cuenca alta del RB (1995).
- CAR-Informe de monitoreo del programa de saneamiento ambiental de la cuenca alta del RB (1993).
- CAR-Informe de monitoreo del programa de saneamiento ambiental de la cuenca alta del RB (1998).
- CAR-Resultados del programa de aforo y muestreo del RB y sus principales afluentes. Octubre -1996;- Volumen II-.
- CAR-Diagnóstico ambiental y legalización de las industrias del cuero (1999).
- CAR- Diagnóstico ambiental y legalización de las industrias del curtido de pieles. Fase II. Febrero 2001.

Expediente No. 25000-23-27-000-2001-0479-01  
Acumulados Nos. 2000-0428, 2001-0122, 2001-0343  
Actor: GUSTAVO MOYA ÁNGEL Y OTROS  
Acción Popular

- -CAR- Actualización del análisis del comportamiento temporal y espacial de la cuenca alta, media y baja del RB. Informe Final-2000.
- CAR Recopilación, actualización y análisis de la información de las plantas de tratamiento de Aguas Residuales-Evaluación técnica. Agosto 2000.
- CAR Propuesta de pacto de cumplimiento para el Saneamiento del Río Bogotá. Septiembre del 2003.
- IDEAM Estudio de Diagnóstico ambiental realizado en los Municipios de Villapinzón y Chocontá. Junio 2001.
- IDEAM Condiciones e indicadores ambientales en Colombia- Proyecciones en el corto, mediano y largo plazo. Octubre 2000.
- IDEAM Condiciones e indicadores ambientales en Colombia- Proyecciones en el corto, mediano y largo plazo. Enero 2001.
- IDEAM Diagnóstico ambiental y lineamiento para uso sostenible del área- Villapinzón-Chocontá. (Cundinamarca).
- Informe compromisos ambientales por Ingeniería: MARIENE PINZON TORRES, (Empresa de Acueducto y Alcantarillado de Mosquera), en la mesa de trabajo para efectos del pacto de cumplimiento.
- Proyecto COL/99/018- "Apoyo a la Gobernación de Cundinamarca en la Implementación del Plan de Desarrollo humano, Económico y Ambiental".
- Propuesta de pacto -Empresa de Acueducto y Alcantarillado -Aseo Zipaquirá.
- Pacto de cumplimiento: Municipio de Cajicá, Chía, Cogua, Cota, Gachancipá, Nemocón, Sopó, Tabio, Tenjo, Tocancipá y Zipaquirá.

Expediente No. 25000-23-27-000-2001-0479-01  
Acumulados Nos. 2000-0428, 2001-0122, 2001-0343  
Actor: GUSTAVO MOYA ÁNGEL Y OTROS  
Acción Popular

- Pacto de cumplimiento: Manejo de aguas residuales.
- Programa de saneamiento ambiental de la Cuenca Alta del río Bogotá-Distrito Sanitario Chocontá-Villapinzón.
- Programa de saneamiento ambiental de la Cuenca Alta del río Bogotá.
- Proyecto de Adquisición de Predio, diseño, y Construcción de la Planta de Tratamiento, colectores y emisario final de aguas residuales para el Municipio de Villapinzón.
- Plan de Ordenamiento Territorial del Municipio de Chía (Cundinamarca).

## **ANEXOS**

### **ANEXOS DE LA ACCION POPULAR-0479**

- GEO- "Grupo empresarial Carnes de Colombia S.A."- Problemática de Mataderos o Industrias de Curtición del cuero en la capital y Municipios de Aledaño y Briceño (Estudios IV- Diagnostico #1).
- EAAB- Estudio de actualización del plan maestro de alcantarillado de la cuenca del Fucha- Diseños de obras de expansión. (Informe de alternativas #2).
- Estudios ajustes de datos para informes de usos y estándares de calidad del Río Bogotá. (Carlos Alberto Giraldo).
- EAAB- Alternativas del interceptor TUNJUELO-CANOAS. (Consultor: Carlos Alberto Giraldo López. Mayo de 2003).
- Estudio Diagnóstico documento sobre industrias de curtiembres de Villapinzón.

Expediente No. 25000-23-27-000-2001-0479-01  
Acumulados Nos. 2000-0428, 2001-0122, 2001-0343  
Actor: GUSTAVO MOYA ÁNGEL Y OTROS  
Acción Popular

- Decisión de remisión por competencia. No. 4883.
- ACTA DE DILIGENCIA DE INSPECCIÓN JUDICIAL Despacho Comisorio No. 593 DEL JUZGADO 2 CIVIL DEL CTO DE BTÁ.- AP-01-479-CONTRA Empresa de Energía Eléctrica de Bogotá-.
- ACTA DE DILIGENCIA DE INSPECCIÓN JUDICIAL a la Zona del Embalse del Muña realizada por PERITOS de la UNIVERSIDAD NACIONAL.
- Saneamiento ambiental del embalse de Muña, Universidad de los Andes, 1.998.
- Informe final EMGESA, Programa de mosquitos y roedores en el embalse del Muña, y su área de influencia, marzo de 1998.
- Universidad Nacional Priac fase uno. Programa de educación y sensibilización ambiental en el área de influencia del embalse del Muña, septiembre de 1996.
- Informe de unidad de Medio Ambiente de la Empresa De Energía: Estudio y Plan de acción para la mitigación de la contaminación del embalse del Muña, Informe tutela 002 de abril de 1994.
- Alternativas a la solución del problema de la contaminación del Embalse del Muña, Universidad de los Andes. Eugenio Giraldo.
- Estudio presentado por la Universidad Nacional de Colombia a la EEB sobre la proliferación, control y disposición de buchón de agua en el embalse del Muña.
- Estudio socio-económico del proyecto de recolección del embalse del Muña, presentado por la Universidad de los Andes.

Expediente No. 25000-23-27-000-2001-0479-01  
Acumulados Nos. 2000-0428, 2001-0122, 2001-0343  
Actor: GUSTAVO MOYA ÁNGEL Y OTROS  
Acción Popular

- Estudio hidráulico presentado por INGETEC a la EEB sobre el embalse del Muña.
- INTERROGATORIO DE PARTE, al representante legal de la EEB.
- INSPECCIÓN JUDICIAL CON INTERVENCIÓN DE PERITOS, al embalse del Muña, ubicado en la Jurisdicción del Municipio de Sibaté, Departamento de Cundinamarca, con el objeto de evaluar el estado del embalse y sus consecuencias en el entorno ecológico de la región. Por la especialidad del dictamen pericial se solicitó a la Universidad Nacional de Colombia, allegar al proceso una lista de ingenieros ambientales.
- INSPECCIÓN JUDICIAL CON EXHIBICIÓN DE DOCUMENTOS. A los documentos de la oficina de la EEB, entre otros se encuentra :
  - Estudio hidráulico presentado por INGETEC a la EEB sobre el embalse del Muña.
  - Estudio presentado por la Universidad Nacional de Colombia a la EEB sobre la proliferación, control y disposición del "buchón de agua", en el embalse del Muña.
  - Estudio socio-económico del proyecto de recolección del Embalse del Muña presentado por la Universidad de los Andes.

## TESTIMONIOS

1. De los habitantes del Municipio de Sibaté, como consecuencia de la contaminación del Embalse de

Expediente No. 25000-23-27-000-2001-0479-01  
Acumulados Nos. 2000-0428, 2001-0122, 2001-0343  
Actor: GUSTAVO MOYA ÁNGEL Y OTROS  
Acción Popular

Muña, a raíz del vertimiento de las aguas negras del río Bogotá.

#### PRUEBA DOCUMENTAL

1. Decreto 345 de Junio 2 de 1992 de la Alcaldía Mayor de Bogotá D.C., mediante el cual se designó al doctor ALBERTO CALDERON ZULETA, como Gerente de la Energía Eléctrica de Bogotá.
2. PROGRAMA DE AUDITORIA AMBIENTAL REPRESA DEL MUÑA (Municipio de Sibaté (Cundinamarca) -Resultados del programa, Octubre de 1998-; incluye anexo fotográfico y mapa de la zona de estudio: cuenca alta.
3. El Juzgado Segundo Civil del Circuito de Bogotá comisionó al Juez Promiscuo Municipal de Sibaté, Cundinamarca, por medio del Despacho Comisorio No. 545, para la **RECEPCIÓN DE TESTIMONIOS** la cual se llevó a cabo de la siguiente manera:
  - RAMIRO ORLANDO RAMIREZ P. - Diligencia el día 29 de Octubre de 1999.
  - GREGORIO FERNÁNDEZ FERNÁNDEZ. - Diligencia el día 23 de Marzo de 2000.
  - RAYMOND SCHAMBACH. - Diligencia el día 21 de Enero de 2000.
  - Fotografías **INSPECCIÓN JUDICIAL** practicada el Día 11 de Octubre de 1999, al Embalse del Muña por el Juzgado 1 Civil del Circuito de Soacha, dentro del Proceso Abreviado de Gustavo Moya Ángel, contra la empresa de Energía Eléctrica de Bogotá.

Expediente No. 25000-23-27-000-2001-0479-01  
Acumulados Nos. 2000-0428, 2001-0122, 2001-0343  
Actor: GUSTAVO MOYA ÁNGEL Y OTROS  
Acción Popular

- **DICTAMEN PERICIAL.** ordenado por el Juzgado 2 Civil del Circuito de Bogotá, este informe incluye el cuestionario objeto del dictamen, en el cual se plantea el problema existente del Embalse de Muña y su entorno, los estudios analizados, las consultas y asesorías solicitadas a entidades privadas y gubernamentales, para detallar las alternativas y costos solicitados por la parte actora. Además anexan, Planos de Localización; Modelo propuesto "Planta de Tratamiento de Aguas El Salitre"; Resolución CAR No. 1489 del 10 de Septiembre de 1999; Diseño de Diques y Bernas Estabilizadoras; Fotografías de adelanto de obras; Diseños de Estaciones de bombeo; Propuestas de Lodos activados y Barrera Direccional; Propuesta de Barrera Forestal; Planchas Cartográficas.
- EEB-Proyecto. Diciembre 1996- Universidad Nacional de Colombia. Fase I del programa de educación y sensibilización ambiental en el área de influencia del Embalse de Muña, Municipio de Sibaté -1996.
- EMGESA-Impacto ambiental de la Suspensión del Bombeo al Embalse de Muña.
- EMGESA- Universidad de los Andes "Saneamiento ambiental del Embalse de Muña. Vol. I- Descripción del embalse, modelos y alternativas planteadas. Noviembre de 1998.
- Programa de Saneamiento del Río Bogotá, definición de la alternativa a seguir "Unión Temporal Saneamiento Río Bogotá con caudales

Expediente No. 25000-23-27-000-2001-0479-01  
Acumulados Nos. 2000-0428, 2001-0122, 2001-0343  
Actor: GUSTAVO MOYA ÁNGEL Y OTROS  
Acción Popular

Bajos". (Carlos Alberto Giraldo López). #5.  
Versión 01.

- Comportamiento de la cuenca media del Río Bogotá con Caudales Bajos. (Carlos Alberto Giraldo López).
- Diagnóstico de los establecimientos cuya actividad principal es el lavado de autos y tienen información de los archivos del DAMA- Contrato 131/02 (Gerardo Romero Tovar) Ingeniero de petróleos, Especialista en Manejo integrado del Medio Ambiente. Junio 2003.
- EMGESA- Balance socio -Ambiental.
- Proyecto Producción más limpia en las curtiembres de Cundinamarca (Preparado por: UNIVALLE, GRAMIL, CINDRA, UNESCO-IHE, apoyo de la CVC). Junio de 2004.
- Plantas de tratamiento de cada Municipio, administrado por la CAR.
- Informe de la CAR sobre visitas, cultivos de flores, realizadas con la Honorable Magistrada- incluye soportes técnicos.
- Informe y Diagnósticos: habla del estudio ambiental.
- CAR- Cuencas de los Ríos Bogotá, Ubaté y Suárez.
- Modelación preliminar de la calidad del agua en los interceptores Fucha-Tunjuelo; Tunjuelo-Canoas y de la calidad del agua del Río Bogotá, para la condición con y sin interceptores. Versión 1.
- Estudios Técnicos (Estudio de Saneamiento del Río Bogotá)- Resumen. Noviembre del 2003.

Expediente No. 25000-23-27-000-2001-0479-01  
 Acumulados Nos. 2000-0428, 2001-0122, 2001-0343  
 Actor: GUSTAVO MOYA ÁNGEL Y OTROS  
 Acción Popular

- EAAB -Modelación de la calidad del Río Bogotá. Diciembre 2002-Estudio de la Universidad de los Andes.
- Prediseño Planta de Tratamiento de Aguas Residuales Canoas- Versión 1. (Carlos Alberto Giraldo López). Junio de 2003
- Población, Caudales y Cargas Contaminantes- Unión temporal Saneamiento de Bogotá. Agosto de 2002.
- INSPECCION JUDICIAL A LA REPRESA DEL MUÑA. Nacimiento del Río Bogotá-ACURTIR- Asociación de curtidores de Villapinzón y Chocontá.
- FOTOS
- 1 CD-Apelación ante Consejo de Estado de la Sentencia del Tribunal administrativo de Cundinamarca, sobre la AP-479 -Facultad de Ingeniería comercial y ambiental.
- 1 VHS- Antecedentes

**VIDEO: Corporación ecológica.**

#### **ANEXOS DE LA ACCION POPULAR -0122**

- EEEB- Vertimientos Embalse de Muña.
- Anexos Contestación de la demanda E.A.A.B
- Contrato 015- Contestación de la demanda.
- EEEB- Vertimientos Embalse de Muña; 1 video- 1 Cassette.
- CAR- ESTUDIOS. Resultados del análisis de Laboratorio, de la Universidad de los Andes, Facultad de Ingeniería.

Expediente No. 25000-23-27-000-2001-0479-01  
 Acumulados Nos. 2000-0428, 2001-0122, 2001-0343  
 Actor: GUSTAVO MOYA ÁNGEL Y OTROS  
 Acción Popular

- CAR- Estudio sobre el saneamiento ambiental del Embalse de Muña, Universidad de los Andes.
- CAR- Estudio de Morbimortalidad de la zona de influencia del Embalse de Muña.
- CAR- OBRAS REALIZADAS POR EMGESA S.A.
- PLAN DE VIDA MUÑA- Mesas de trabajo No. 1; Técnica 2; 3; 4; reuniones- Actas de conclusiones.
- VIDEOS Y CASSETTES.

#### **ANEXOS DE LA ACCION POPULAR AP-428**

- EAAB-Definición de los lineamientos para continuar con el Saneamiento del río Bogotá. Septiembre 2000.
- Mejoramiento Ambiental en el Embalse de Muña.
- EAAB-Estudio para la Estrategia de Saneamiento del río Bogotá "FONADE Y EAAB"-1993.
- EAAB- Tratamiento de aguas Residuales en Bogotá - FOSTER INGENIERÍA LTDA.
- Bogotana de aguas S.A. FOSTER INGENIERÍA LTDA.- IMPACTOS SOCIOECONOMICOS DE LA CONTAMINACION DEL RÍO BOGOTÁ. Julio 2001- ESCENARIOS DE FINANCIACION FUTURA Y DESARROLLO DEL PROYECTO DE LA CONTAMINACION DEL RÍO BOGOTÁ.
- EAAB- Inversión recursos financieros- Diseños y obras de saneamiento ambiental y drenaje pluvial. Septiembre 2000.
- Análisis y Evaluación de acciones y Residuales de la Capital por parte de la EAAB, a lo largo de 10 años así como los planes ambientales actualmente en proceso. Consultor Enrique Giraldo Nieto. Enero 3/96.

Expediente No. 25000-23-27-000-2001-0479-01  
Acumulados Nos. 2000-0428, 2001-0122, 2001-0343  
Actor: GUSTAVO MOYA ÁNGEL Y OTROS  
Acción Popular

- EAAB-INFORME EJECUTIVO- Ajuste a la solicitud de Modificación de Fórmulas Tarifarias atendiendo a las observaciones de la Comisión de Regulación de Agua Potable y Saneamiento Básico de acuerdo con el Oficio Auto 01 de 1999.- Marzo 1999.
- EAAB- Solicitud de Modificación "Tarifaría" de los servicios de Acueducto y Alcantarillado. Agosto 1998.
- EAAB- Definición de los lineamientos para continuar con el saneamiento del Río Bogotá.
- EAAB-Análisis y Evaluación de Acciones y Programas de manejo y disposición de aguas residuales de la ciudad capital por parte de la EAAB a lo largo de los últimos años, así como los planes ambientales actualmente en proceso-Informe final. Consultor Enrique Giraldo Nieto. 3 de Enero de 1996.
- EAAB-Estudios Hidráulicos, Geotécnicos y Topográficos para definir el nivel de los Jarillones y Obras Requeridas para mitigar el riesgo de inundaciones del Río Bogotá. En el Tramo Alicachín-La Conejera-Informe Final -Marzo 2000.

#### **ANEXOS DE LA ACCIÓN POPULAR AP-01-343**

- CAR- Informe Técnico de funcionamiento de la Planta de Tratamiento de Aguas Residuales del Municipio de Sopó. Julio 1998- Consorcio GerverEssere Ltda.
- Mejoramiento Ambiental en el Embalse del Muña.
- CAR- Diagnóstico ambiental Legalización de las Industrias del Cuero Diciembre 1999.

Expediente No. 25000-23-27-000-2001-0479-01  
Acumulados Nos. 2000-0428, 2001-0122, 2001-0343  
Actor: GUSTAVO MOYA ÁNGEL Y OTROS  
Acción Popular

- Resumen ejecutivo- Diagnóstico ambiental y legalización de las industrias del curtido de Pielles fase II.
- Anexo de Miguel Ángel Chávez Chávez y otros: Estudios fisicoquímicos de la calidad del agua del Río Bogotá del año 1958 a 1967-FUNDACION VERDE-VIVO.
- CAR- Programa de monitoreo de la calidad del RB, desde Municipio de Villapinzón, hasta la Planta de Tratamiento de Tibitoc.
- CAR- Diagnóstico ambiental y legalización de las industrias del curtido de pieles. Fase II. Febrero 2001.
- Actualización del análisis del comportamiento temporal y espacial de la cuenca alta, media y baja del RB. Informe Final-2000.
- Recopilación, actualización y análisis de la información de las plantas de tratamiento de Aguas Residuales-Evaluación técnica. Agosto 2000.
- Propuesta de pacto de cumplimiento para el Saneamiento del Río Bogotá. Septiembre de 2003.
- IDEAM- Diagnóstico ambiental y lineamiento para uso sostenible del área- Villapinzón-Chocontá. (Cundinamarca)
- Informe compromisos ambientales por Ingeniería: MARIENE PINZON TORRES, (Empresa de Acueducto y Alcantarillado de Mosquera), en la mesa de trabajo para efectos del pacto de cumplimiento.
- Proyecto COL/99/018- "Apoyo a la Gobernación de Cundinamarca en la Implementación del Plan de Desarrollo humano, Económico y Ambiental".

Expediente No. 25000-23-27-000-2001-0479-01  
Acumulados Nos. 2000-0428, 2001-0122, 2001-0343  
Actor: GUSTAVO MOYA ÁNGEL Y OTROS  
Acción Popular

- CAR- Informe Técnico de funcionamiento de la Planta de Tratamiento de Aguas Residuales del Municipio de Sopó. Julio 1998- Consorcio GerverEssere Ltda.
- CAR- "Proyecto, diseño y construcción y puesta en marcha Planta de tratamiento de Sopó II y entrega PTAR SOPO I.
- Acuerdo 009 del 2001: "Plan de desarrollo vigencia 2001-2003-Concejo Municipal Sopó".
- Programa de saneamiento ambiental de la Cuenca Alta del río Bogotá-Distrito Sanitario Chocontá-Villapinzón.
- CAR -Programa de saneamiento ambiental de la Cuenca Alta del río Bogotá.
- CAR- Programa de saneamiento ambiental de la Cuenca Alta del río Bogotá. Julio de 1999.
- CAR-Programa de saneamiento ambiental de la Cuenca Alta del río Bogotá.
- Programa de aforo y muestreo del río Bogotá y sus principales afluentes validación de constantes para el modelo de simulación de la calidad del agua. Volumen II.
- CAR- Resumen Ejecutivo- Proyecto para el desarrollo de un programa integral de recuperación ambiental y Desarrollo industrial de la zona de Villapinzón - Chocontá.
- CAR-Programa de aforo y muestreo del RB y sus principales afluentes, validación de constantes para el modelo de simulación de la Calidad del Río Bogotá. Volumen II. Octubre -1996.
- CAR -Programa de aforo y Muestreo del Río Bogotá y sus principales afluentes.

Expediente No. 25000-23-27-000-2001-0479-01  
Acumulados Nos. 2000-0428, 2001-0122, 2001-0343  
Actor: GUSTAVO MOYA ÁNGEL Y OTROS  
Acción Popular

- CAR -Programa de saneamiento ambiental de la cuenca alta del RB.
- Recopilación, actualización y análisis de la información de las plantas de tratamiento de aguas residuales- Actualización del análisis del comportamiento temporal y espacial de la cuenca alta, media y baja del río Bogotá.
- Programa de aforo y muestreo del río Bogotá y sus principales afluentes, validación de constantes para el modelo de simulación de la calidad del agua. Volumen II.
- Informe de monitoreo del programa de saneamiento ambiental de la cuenca alta del RB (1993).
- Programa de saneamiento ambiental de la Cuenca Alta del río Bogotá-Distrito Sanitario Chocontá-Villapinzón.
- CAR- Diagnóstico ambiental y lineamiento para uso sostenible del área de Villapinzón-Chocontá (Cundinamarca).Junio 2001.
- Recopilación de información de plantas de tratamiento de Aguas residuales de Funza, Facatativá, Mosquera, Madrid I y Madrid II- Análisis del comportamiento temporal y espacial de la cuenca Media y Baja del Río Bogotá.
- Concesión de aguas y vertimientos
- Concesión de aguas.
- Vertimientos.
- Proyecto de adquisición de Predio, diseño, y Construcción de la Planta de Tratamiento, colectores y emisario Final de aguas residuales para el Municipio de Villapinzón.

Expediente No. 25000-23-27-000-2001-0479-01  
 Acumulados Nos. 2000-0428, 2001-0122, 2001-0343  
 Actor: GUSTAVO MOYA ÁNGEL Y OTROS  
 Acción Popular

- Plan de Ordenamiento Territorial del Municipio de Chía (Cundinamarca).
- Licencia Ambiental de Plantas de Tratamiento Río Bogotá.
- Gobernación de Cundinamarca- Tribunal Administrativo de Cundinamarca. Mayo 2003.
- CAR-Diagnóstico ambiental y legalización de las industrias del curtido de Pielles. Diciembre 1999.
- EAAB-Condiciones e indicadores ambientales en Colombia.- Proyecciones en el corto, mediano y largo plazo. Octubre 2000.
- EMGESA-Programa de control de Mosquitos y Roedores en el embalse del Muña y su área de influencia Municipio de Sibaté. Marzo 1998.
- Licencia Ambiental Plantas de Tratamiento Río Bogotá.
- Sociedad geográfica de Colombia-Gobernación de Cundinamarca -Cuenca Alta del Río Bogotá- Región Programa Plan de Ordenamiento Territorial.
- Desinfección de afluentes de Plantas de Tratamiento de Aguas Residuales. Versión 1. Mayo de 2003.
- La EAAB anexa un documento: USOS Y ESTANDARES DE LA CALIDAD DEL RIO DE BOGOTA -Escenario más probable de la Cuenca del Río Bogotá con Horizonte de Planificación al año 2012-UNION TEMPORAL SANEAMIENTO DEL RÍO BOGOTÁ- Agosto de 2002.

#### **VIDEOS AP-01-343**

- INSPECCION JUDICIAL a la Represa del Muña (video).Octubre 11 de 1991- Despacho Comisorio 1593.

Expediente No. 25000-23-27-000-2001-0479-01  
Acumulados Nos. 2000-0428, 2001-0122, 2001-0343  
Actor: GUSTAVO MOYA ÁNGEL Y OTROS  
Acción Popular

- ACURTIR: Nacimiento Río Bogotá- Acurtir Asociación de curtiembres Villapinzón y Chocontá.

#### **CASSETTE 1 - CD 14**

#### **VIDEOS**

- Plan de vida Muña 2000-Etapa I-II-III
- Plan de vida Muña 2000-Etapa I-II-III. Asociación de curtidores de Villapinzón y Chocontá (Nacimiento del Río Bogotá).
- Frigorífico San Martín de Porres.
- Anexo Prueba

#### **SEGUNDA INSTANCIA**

- Fl. 6961 a 6972 anexa la CAR copia informal Tutela promovida por el MAVDT.
- Fls. 6973 a 7027, anexos CAR contrato BID y Conpes 3320.
- Fl. 7211 a 7214 ciudadanos Sibaté desconocimiento efectos cosa juzgada. Anexa decisiones judiciales fls. 7215 a 7275.
- Fls. 7276 a 7385 Plan de Desarrollo del Municipio de Gachancipá 2004-2007.
- Fl. 7911 Informe secretarial recibe oficio Tribunal Cundinamarca Sección Cuarta adjunta documentos en 69 folios.
- Fls. 7913 a 7978 escrito apoderado EMGESA en el cual solicita tener por agregado al expediente las resoluciones 506 de 28 de marzo de 2005 y 1189 de 2005 emanadas de la CAR las cuales aporta en copia

Expediente No. 25000-23-27-000-2001-0479-01  
Acumulados Nos. 2000-0428, 2001-0122, 2001-0343  
Actor: GUSTAVO MOYA ÁNGEL Y OTROS  
Acción Popular

auténtica; se haga un pronunciamiento de cómo deben proceder las entidades demandadas respecto de las obligaciones impuestas por la CAR e impartir órdenes a la CAR se abstenga de ejecutar los actos administrativos expedidos por ella.

- Fls. 8106 a 8112, memorial apoderado Departamento de Cundinamarca solicita reconocer personería y allegar comunicado prensa CAR sobre recursos recuperación Río Bogotá.
- Fl. 8358 informe secretarial recibe memorial Dr. Andrés Caldas Rico con 9 folios anexos, apoderado general de EMGESA, solicita dar continuidad al proceso e informa sobre las obras adelantadas en el Embalse, adjunta CD, requiere además que haya una labor conjunta y coordinada de todos los agentes contaminantes.
- Fl. 8385 informe secretarial recibe memorial DIANA PATRICIA VARGAS URREGO ciudadana en 4 folios y un anexo sin foliar. Solicita requerir al Gobierno Nacional sobre los recursos destinados al proyecto "Ciudad ALO Segundo Centenario" y cuál es el estado del Megaproyecto de Saneamiento Ambiental del río Bogotá y el impacto de las obras de infraestructura. Anexa presentación "Proyecto Ciudad Alo Segundo Centenario" (fls. 8390 a 8483).
- Fl. 8493 memorial suscrito Roberto Serrato Valdés Procurador con documentos anexos en 36 folios.
- Fl. 8584 memorial suscrito Juan Antonio Arbeláez Buraglia, ingeniero químico con maestría en gestión y auditorías ambientales solicita se examinen los documentos que acompaña, memorial suscrito por el Contralor General y el Procurador General.

Expediente No. 25000-23-27-000-2001-0479-01  
Acumulados Nos. 2000-0428, 2001-0122, 2001-0343  
Actor: GUSTAVO MOYA ÁNGEL Y OTROS  
Acción Popular

- Fls. 8615 a 8701, memorial suscrito por el ingeniero químico Juan Antonio Arbeláez, allega documentos y pone de presente la inconveniencia de la propuesta adoptada en la sentencia de primera instancia. Se destaca el documento "Cuenca Alta del río Bogotá REGIÓN PROGRAMA Plan de Ordenamiento Territorial", Sociedad Geográfica de Colombia Academia de Ciencias Geográficas y la Gobernación de Cundinamarca de diciembre de 2000. (fls. 8628 a 8701).
- Fl. 8714 a 8716 memorial Juan Antonio Arbeláez Buraglia. Modelo de intervención presentado por la EAAB para el tratamiento de aguas residuales río Bogotá, observaciones críticas.
- Fl. 8759, memorial apoderado sociedad STANTON & CIA S.A., adjunta informe gestiones cumplimiento pacto suscrito Tribunal de instancia.
- Fl. 8763, memorial Sociedad Papeles y Corrugados Andina S.A., adjunta informe cumplimiento del pacto suscrito Tribunal de instancia (fls. 8764 a 8794).
- Fl. 8859 memorial comité de gestión y seguimiento de la Agenda ciudadana de Control fiscal participativo para la descontaminación del río Bogotá.
- Fl. 8883 memorial Presidenta Empresa Energía de Bogotá S.A. E.S.P. adjunta documento "La empresa de energía de Bogotá S.A. E.S.P. (EEB) frente al Muña" presentado en la audiencia pública. Folios 8884 a 8897.
- Fl. 8958 memorial comentarios audiencia pública Alcalde Municipio de Sibaté y las falencias del sistema maestro de acueducto y alcantarillado del

Expediente No. 25000-23-27-000-2001-0479-01  
Acumulados Nos. 2000-0428, 2001-0122, 2001-0343  
Actor: GUSTAVO MOYA ÁNGEL Y OTROS  
Acción Popular

municipio a pesar de las afirmaciones hechas por la CAR.

- Fl. 8971, memorial Ministerio Minas y Energía sobre las labores desarrolladas por el Ministerio, fiscalización y seguimiento minero.
- Fl. 9093 informe secretarial memorial en 8 folios Contralor de Bogotá
- Fl. 9093c informe secretarial recibo memorial suscrito Javier Tamayo Jaramillo anexa documentos en 4 folios.
- Fl. 9093j informe secretarial recibe memorial Dr. Jaime Castro en 2 folios, comentarios observaciones Contraloría Bogotá planta tratamiento en Canoas, predios, costos, cierre financiero.
- Fl. 9032 informe secretarial memorial Dr. Ramiro Bejarano en 8 folios.
- Fl. 9096 informe secretarial memorial presentado Olga Nadesda Cabrera y otros en 40 folios, en representación Agenda Ciudadana de Control Fiscal Participativo para la Descontaminación del río Bogotá.
- Fl. 9137 informe secretarial recibe memorial Hernando Robles Villa en 14 folios, Corporación Girardotemos.
- Fl. 9197 Informe secretarial cumplido auto folio 9158. Oficios librados en respuesta a requerimientos, reconocimiento personería y documento del apoderado de la CAR en el cual se allega el ACUERDO DE COOPERACION PARA LA CONSTRUCCION DE LA PLANTA DE TRATAMIENTO DE AGUAS RESIDUALESDE CANOAS FASE I Y II de 21 de febrero de 2011 en los folios 9182 a 9196.

Expediente No. 25000-23-27-000-2001-0479-01  
Acumulados Nos. 2000-0428, 2001-0122, 2001-0343  
Actor: GUSTAVO MOYA ÁNGEL Y OTROS  
Acción Popular

- Fl. 9199 informe secretarial recibe memorial Dr. Jaime Castro advierte sobre la existencia del control de advertencia hecho por la Contraloría general de la República.
- Fl. 9201 informe secretarial memorial suscrito Procurador Delegado Dr. Roberto Serrato adjunta 136 folios documento presentado al Procurador general de la Nación por la Red Nacional Regional y distrital de veedurías ciudadanas y control social. Refiere control de advertencia de la Contraloría general de la República.
- Fl. 9350 informe secretarial recibe memorial Ministerio Público en 15 folios relacionados control de advertencia allegado en copia por la red nacional, regional y distrital de veedurías ciudadanas.
- Fl. 9379 oficio Tribunal Administrativo de Cundinamarca Sección Cuarta Subsección B remite en quince folios acta de audiencia de verificación cumplimiento pactos aprobados en el proceso de la referencia.
- Fl. 9423 a 9434 Control de Advertencia al Acuerdo 22 de febrero de 2011
- Fl. 9436 a 9495 la CAR da cumplimiento al requerimiento ordenado por auto de 6 de septiembre de 2006 incluye CDs (5)
- Fl. 9496 a 9514 Informe Plan maestro de alcantarillado sanitario y pluvial del municipio de Soacha. Incluye un CD.
- Fl. 9516 a 9544 Municipio de Villapinzón: Plan Maestro obras realizadas y proyectadas incluye un CD.

Expediente No. 25000-23-27-000-2001-0479-01  
Acumulados Nos. 2000-0428, 2001-0122, 2001-0343  
Actor: GUSTAVO MOYA ÁNGEL Y OTROS  
Acción Popular

- 9546 a 9550 Ministerio de Minas y Energía Remite mapa impreso de la Cuenca alta media y baja del Río Bogotá con las zonas excluibles de la minería.
- 9553 a 9611 Municipio de Cajicá Informe Planes Maestros de Acueducto y Alcantarillado y Plano de Uso de suelo relacionado cauce Río Bogotá.
- 9612 a 9615 Municipio de Sesquilé, Informe plan maestro de acueducto y alcantarillado y de saneamiento de aguas residuales, adjunta un CD.
- 9616 a 9725 Municipio de Gachancipá, Planes maestros de Acueducto y alcantarillado Municipal, obras de redes de alcantarillado de aguas negras y aguas lluvias, usos del suelo
- 9726 a 9763 EAAB, Actuaciones desplegadas relativas planes y proyectos dirigidos al saneamiento del río Bogotá y sus afluentes así como sus repercusiones presupuestales. Redes de aguas lluvias, construcción de interceptores, diseño y construcción sistema tratamiento aguas residuales, estado actual obras y proyecciones, presupuesto, componente financiero y económico, costos plantas tratamiento aguas residuales, planes maestros de acueducto y alcantarillado incluye un CD.
- 9764 a 9768 Municipio de Suesca, Informe infraestructura de alcantarillado y saneamiento básico del municipio. Incluye un CD.
- 9769 a 9845 Alcaldía municipal de Chía, Informe implementación plan maestro acueducto y alcantarillado y otras obras de mitigación y prevención. Incluye un CD.
- 9846 a 9927 Municipio de Tocancipá, Informe implementación plan maestro acueducto y

Expediente No. 25000-23-27-000-2001-0479-01  
Acumulados Nos. 2000-0428, 2001-0122, 2001-0343  
Actor: GUSTAVO MOYA ÁNGEL Y OTROS  
Acción Popular

alcantarillado y otras obras de mitigación y prevención. Usos del suelo en relación cauce río Bogotá, presupuesto y porcentaje destinado al saneamiento. Incluye un CD.

- Fl. 9928 a 9980, municipio de Funza, Informe Implementación Plan Maestro de Acueducto y Alcantarillado, Obras proyectadas saneamiento aguas residuales, usos del suelo, recursos destinados al saneamiento ambiental.
- Fl. 9981 a 10178 municipio de Mosquera Informe compromisos aprobados Tribunal dentro de la acción popular, Implementación Plan maestro de Acueducto y Alcantarillado.
- Fl. 10180 a 10191, municipio de Cogua, Informe Implementación Plan Maestro de Acueducto y Alcantarillado, Obras proyectadas saneamiento aguas residuales, usos del suelo, recursos destinados al saneamiento ambiental. Incluye un CD.
- Fls. 10200 a 10225 El Ministerio de Minas y Energía anexa copia concepto rendido al Ministerio de Ambiente.
- Fl. 10232 a 10254 Apoderado de EMGESA remite copia Convenio Interinstitucional EAAB, y EMGESA.
- Fl. 10263 a 10276 Secretaría Distrital de Ambiente Actividades de recuperación ambiental en el marco de la AP.
- Fls. 10280 a 10460 Coadyuvante segunda instancia. Anexa un CD y un DVD.
- Fl. 10468 El TAC Secretaría Sección Cuarta remite copia actas audiencias verificación

Expediente No. 25000-23-27-000-2001-0479-01  
Acumulados Nos. 2000-0428, 2001-0122, 2001-0343  
Actor: GUSTAVO MOYA ÁNGEL Y OTROS  
Acción Popular

- Fl. 10703 a 10705, Informe de proyectos ejecutados dentro del Plan Maestro de Acueducto y Alcantarillado del Municipio de Soacha.
- Fl. 10706 a 10734, Respuesta requerimiento de información de la E.A.A.B.
- Fl. 10823 a 10841, Análisis técnico de las posibles implicaciones que tendría la salida de generación eléctrica de Pagua
- Fl. 10845 a 10847, Informe CAR sobre la actuación administrativa respecto del permiso de vertimiento y ocupación de cauce.
- Fl. 10858 a 10859, Remisión por parte del Ministerio de Minas del análisis técnico de las posibles implicaciones que tendría la salida de generación eléctrica de Pagua.
- Fl. 10877 a 10889, Remisión por parte del Ministerio de Minas del análisis técnico de las posibles implicaciones que tendría la salida de generación eléctrica de Pagua.
- Fl. 10899 a 10908, Informe de la E.A.A.B. en el cual responde interrogantes sobre la construcción del interceptor Tunjuelo - Canoas.
- Fl. 10911 a 10913, Informe E.A.A.B. sobre el cumplimiento de la medida cautelar.
- Fl. 10924, Documento Megaproyecto Río Bogotá (Alfonso Pérez Preciado).
- Fl. 11087 a 11096, Dra. Nelly Yolanda Villamizar respuesta requerimiento, labores proceso de verificación.
- Fl. 11102, Consorcio canoas respuesta auto 25-09-12 Informe Interventoría contrato 115-2009 Geología

Expediente No. 25000-23-27-000-2001-0479-01  
Acumulados Nos. 2000-0428, 2001-0122, 2001-0343  
Actor: GUSTAVO MOYA ÁNGEL Y OTROS  
Acción Popular

Predios Hacienda Canoas e INVIAS trazado interceptores y pozo ITC-12.

- Fl. 11103 a 11148, Consorcio Canoas Respuesta interrogantes auto 25-09-12
- Fl. 11187 a 11199, EMGESA allega Convenio Interinstitucional EAAB y EMGESA
- Fl. 11200 a 11216, Informe Audiencias Especiales Tribunal Administrativo de Cundinamarca Sección Cuarta Subsección B.
- Fl. 11219 a 11222, Diligencia de inspección Judicial Tribunal Administrativo de Cundinamarca.
- Fl. 11226, La Contraloría Delegada Sector infraestructura solicita autorización a la Corporación adelantar investigación establecer si hubo cambios en los estudios y diseños originales relacionados en el contrato.
- Fl. 11227 a 11230, Fundación Granja Ecológica preocupaciones sobre el río Bogotá y su recuperación.
- Fl. 11257, Consorcio Canoas allega documentos de interés
- Fl. 11518 a 11520, CAR documento aclaratorio afirmaciones hechas en la diligencia de inspección judicial por la EAAB.
- Fl. 11542 a 11547, Ministerio Vivienda Ciudad y Territorio oficio refiere aspectos relacionados recursos y licencia ambiental
- Fl. 11670 a 11760, Gobernación Cundinamarca Informe ejecución sentencia primera instancia y copia presentación alusiva.
- Fl. 11869 a 11872, Compromiso recursos Ministerio Vivienda Ciudad y Territorio, tema recursos y llama

Expediente No. 25000-23-27-000-2001-0479-01  
Acumulados Nos. 2000-0428, 2001-0122, 2001-0343  
Actor: GUSTAVO MOYA ÁNGEL Y OTROS  
Acción Popular

la atención sobre las razones por las cuales es necesario construir la Estación Elevadora y la Planta de Tratamiento de Aguas Residuales en Canoas, por sus implicaciones en el sistema energético del país. Refiere igualmente el desarrollo de los Convenios y Acuerdos celebrados con posterioridad a la expedición de la sentencia de primera instancia, las obras ejecutadas y sus costos, las obras en ejecución y las ejecuciones pendientes de conformidad con lo establecido en el Acuerdo de 21 de febrero de 2011 entre el Ministerio de Ambiente, Vivienda y Desarrollo Territorial, el Departamento Nacional de Planeación, la Gobernación de Cundinamarca, la Alcaldía Mayor, la Secretaría Distrital de Hacienda, la CAR y la Empresa de Acueducto y Alcantarillado de Bogotá, el cual concretó los compromisos financieros y trámites presupuestales para asegurar la financiación de la PTAR en Canoas. La Planta se construirá en dos fases: Tratamiento Primario a Primario Químicamente asistido de hasta 14 m<sup>3</sup>/s y Tratamiento Secundario, con los respectivos costos estimados para la PTAR Canoas \$1.7 billones Fase I \$750.000 millones y Fase II \$906.000 millones (fl. 11870 vto.). Mediante Convenio Interadministrativo de cooperación 03MVCT de 30 de diciembre de 2011 suscrito entre la Alcaldía Mayor de Bogotá, la EAAB y el Ministerio; en Comité Técnico No. 77 de 29 de noviembre de 2011, el Viceministro de Agua y Saneamiento Básico del MVCT aprobó el proyecto "Construcción Estación Elevadora de aguas residuales Canoas para el D.C. de Bogotá" el cual se presentó para ser financiado con

Expediente No. 25000-23-27-000-2001-0479-01  
Acumulados Nos. 2000-0428, 2001-0122, 2001-0343  
Actor: GUSTAVO MOYA ÁNGEL Y OTROS  
Acción Popular

aportes de la Nación a través de ese Ministerio, del FNR y de la EAAB E.S.P. (ver cuadro Fl. 11871). El FNR protocolizó el 28 de diciembre de 2011 y el Ministerio el 18 de octubre de 2011 con cargo al Convenio 03/11 la suma de \$21.378.504.676 a nombre de la fiduciaria CORFICOLOMBIANA y destaca que los recursos provenientes del Gobierno Nacional son de destinación específica por lo que, modificaciones en el proyecto como las planteadas por la Empresa de Acueducto y Alcantarillado de Bogotá, no sólo desconocen su rigor técnico sino que significarían la pérdida de estos recursos.

- Fl. 11951 a 11981, Informe EAAB estado actual obras saneamiento río Bogotá.
- Fl. 12057 a 12058, El Ministerio de Minas y Energía aporta documentos de interés al proceso: Plan de Mejoramiento de 29-03-2012; concepto previo no vinculante análisis aspectos técnicos, económicos y sociales de la actividad minera en la Sabana de Bogotá resolución en reemplazo de la 1197/04; Sector Eléctrico y represa del Muña, Cadena Pagua-Paraíso y anexa documento relacionado con la viabilidad de la PTAR CANOAS en relación con el Sistema Energético (fls. 12066 a 12130).
- Fl. 12131 el Consorcio Canoas manifiesta se encuentra a la espera de la entrega del predio "INVIAS", e informa que el contrato terminó el 20 de noviembre de 2012.
- Fl. 12139 a 12150 y un CD, Informe municipio de Chía solicita se incluya en el POT la gestión de riesgo (fl. 12151-12152) y recuperación de las zonas de riesgo (fls. 12153 y 12154).

Expediente No. 25000-23-27-000-2001-0479-01  
Acumulados Nos. 2000-0428, 2001-0122, 2001-0343  
Actor: GUSTAVO MOYA ÁNGEL Y OTROS  
Acción Popular

- Fl. 12209, la EAAB allega documento ingeniero Hugo A. Garavito director red troncal de alcantarillado, presenta informe sobre el avance de las obras para el saneamiento del río Bogotá y sus afluentes y advierte que el Programa de tratamiento de aguas residuales hace parte del Programa de Saneamiento del río Bogotá y se limita a la construcción y operación de plantas de tratamiento de aguas residuales urbanas y del sistema de interceptores que conducen las aguas residuales desde la ciudad a la planta. Dentro de este contexto destaca las actividades a su cargo: i) Sistema de tratamiento de Aguas Residuales: -PTAR Salitre, Fase I TQA con caudal medio de  $4\text{m}^3/\text{s}$  (2004) operada por la EAAB; Convenio 171/07 CAR asume construcción ampliación PTAR Salitre con un caudal de  $7.1\text{m}^3/\text{s}$  a nivel de tratamiento secundario (FASE II), cuenta con un diseño referencial contratado por la CAR, se espera que la CAR licite el diseño y construcción en el primer semestre de 2013. Construida la ampliación la PTAR será operada por la EAAB. -La segunda Planta de Tratamiento de Aguas Residuales no está construida ni existen diseños detallados. La sentencia del Tribunal dispuso su construcción en Canoas (municipio de Soacha) a nivel de tratamiento primario químicamente asistido. La EAAB en la actualidad tiene contratado el diseño detallado de la PTAR y se espera iniciar la ejecución del contrato una vez se contrate la interventoría, proceso que está en curso. ii) Interceptores: La empresa ha construido los siguientes interceptores: Engativá - Cortijo (ENCOR), conduce las aguas

Expediente No. 25000-23-27-000-2001-0479-01  
 Acumulados Nos. 2000-0428, 2001-0122, 2001-0343  
 Actor: GUSTAVO MOYA ÁNGEL Y OTROS  
 Acción Popular

residuales de Engativá la PTAR Salitre; - Fucha-Tunjuelo (IFT) no se ha puesto en operación; Tunjuelo-Canoas-Túnel de Emergencia (ITC-TE), ya construido pero aún no se ha unido porque falta construir el ITC 12, obra suspendida pero luego levantada la medida cautelar, sin embargo no se ha logrado acuerdo con el contratista para la construcción del pozo y la conexión de los dos tramos del interceptor. Interceptor Soacha: construido y conectado con el ITC. Ver cuadro estado obras fl. 12211. Destaca que la Estación Elevadora, Canoas y la PTAR Canoas en evaluación se encuentran pendientes de aprobar en la sentencia de segunda instancia del Consejo de Estado. La EAAB ha propuesto alternativas más económicas. iii) 3.1. **Saneamiento afluentes urbanos.** Implementación PMA Cerros Orientales; recuperación rondas; recuperación humedales; estabilización riegos frente a los aguaceros torrenciales de algunas quebradas. rehabilitación, manejo y protección ambiental; construcción de los colectores de aguas lluvias; adecuación de las quebradas; construcción interceptores red secundaria para las aguas negras; construcción presa Cantarrana y adecuación del Embalse, dragado y realce jarillones ríos Tunjuelito y Bogotá; recuperación cauce río Tunjuelo y otras. En la Tabla 2 fls. 12211 vto., relaciona obras ejecutadas saneamiento afluentes urbanos folios 2004-2011. 3.2 **Avance del Proyecto construcción Estación Elevadora aguas residuales Canoas por el D.C.:** No está construida, fue objeto de diseño básico dentro del contrato No. 1-02-26100-711-2006

Expediente No. 25000-23-27-000-2001-0479-01  
Acumulados Nos. 2000-0428, 2001-0122, 2001-0343  
Actor: GUSTAVO MOYA ÁNGEL Y OTROS  
Acción Popular

sin embargo, no cuenta con diseño detallado para construcción. **RECURSOS:** Aprobados en el año 2011 por un valor de \$327.360.743.085 con aportes por el 58% de la Nación y 42% de la Empresa de Acueducto y Alcantarillado de Bogotá. Para el desembolso de los recursos la Nación se encuentra por remitir al FNR, los términos de referencia para la contratación del mencionado proyecto. La razón, existe incertidumbre jurídica en relación con la construcción de la Estación Elevadora obra que beneficia únicamente al sector de generación eléctrica y no al saneamiento del río Bogotá.

**3.3 Informe Planes Maestros de acueducto y alcantarillado en los 42 municipios de la cuenca y resultados de la priorización de las obras de saneamiento.;** la EAAB cuenta con su Plan Maestro de Acueducto y Alcantarillado en ejecución; de los demás planes maestros no es responsable legalmente la EAAB aun cuando mediante convenios ha apoyado algunos proyectos en los municipios del Departamento. Tiene entendido que la Gobernación y la CAR han financiado parcialmente la estructuración de los PMAA de los municipios los cuales están en revisión y/o ejecución.

**3.4 Avances programa rehabilitación Sistema de Alcantarillado:** diagnóstico, diseño y rehabilitación redes, plan de corrección de conexiones erradas; aprobación del Plan de Saneamiento y Manejo de Vertimientos -PSMV, Resolución 3257/07, Secretaría Distrital de Ambiente incluye inspección a los colectores pluviales con circuito cerrado de televisión para determinar la procedencia de las conexiones erradas: Humedal Córdoba usuarios residenciales; zona Montevideo:

Expediente No. 25000-23-27-000-2001-0479-01  
Acumulados Nos. 2000-0428, 2001-0122, 2001-0343  
Actor: GUSTAVO MOYA ÁNGEL Y OTROS  
Acción Popular

usuarios industriales que permitió establecer el procedimiento para conexiones erradas previsto para incorporar en el contrato de condiciones uniformes de la Empresa actualmente en etapa de consulta ante la CRA. **3.5 Estado diseño PTAR Canoas** El 7 de diciembre de 2011 se suscribió el contrato No. 1-02-25500-0690-2011 por valor de \$25.720.406.841 en un plazo de 26 meses; contratista Consorcio CDM-INGESAM, integrado por las firmas INGESAM LTDA: y COMP. DRESSER & MCKEE INC, cuyo objeto es "realizar el diseño a nivel de ingeniería de detalle de la Planta de Tratamiento de aguas residuales de Canoas en los componentes asociados al Sistema de Tratamiento primario con asistencia química", Estado: revisión de requisitos previos firmar acta de inicio y se ha determinado la NO OBJECCIÓN tanto al plan de calidad como a la planificación de recibo de producto. La suscripción del acta de inicio se encuentra pendiente y se realizará una vez se cuente con la interventoría especializada internacional. La cual está en proceso de contratación. **3.6 Avance términos de referencia contratar la construcción de la PTAR Canoas.** Los pliegos para contratar la construcción de la PTAR Canoas son uno de los productos esperados del contrato 1-02-25500-0690-2011 consorcio CDM-INGESAM hasta dentro de 26 meses luego de iniciados los diseños. **3.7. Estudios alternativa seguir para el Programa de Saneamiento del río Bogotá.** Anexa estudio económico financiero que lleva a recomendar el estudio de una alternativa diferente a Canoas (fl. 12222) anexo 5 medio magnético. **3.8. Informe en detalle asignación de**

Expediente No. 25000-23-27-000-2001-0479-01  
Acumulados Nos. 2000-0428, 2001-0122, 2001-0343  
Actor: GUSTAVO MOYA ÁNGEL Y OTROS  
Acción Popular

**competencias técnicas y jurídicas del Programa de Saneamiento del río Bogotá.** Es un proyecto de orden nacional refiere sentencia de la Sección Segunda del Consejo de Estado de junio 5 de 2001 AP-0305-01). A nivel distrital está consagrado en el POT de 2000 que obligó a la EAAB a la construcción de un sistema integral de tratamiento de aguas residuales que por su complejidad podrá estar sujeto a cambios; en el proceso AP 9479 01 se estableció que el programa de saneamiento del río Bogotá requería de una concepción de tratamiento de cuenca que implica la participación de los municipios que lo integran, el departamento de Cundinamarca, la Nación, la CAR y las empresas privadas que se encuentran a lo largo de la cuenca; por ello, la Empresa presentó un proyecto de pacto que involucraba un plan de obras hasta el año 2015; en cuanto a las actividades relacionadas con captación, tratamiento, transporte y distribución de agua potable, recolección de aguas residuales y sus tratamiento, mantenimiento de humedales tienen relación directa con el impacto ambiental de la Cuenca Media del río Bogotá. Tiene además un componente técnico y financiero, el primero fue adoptado por el Tribunal, el segundo carece de recursos que permitan la contratación de las obras, construcción de interceptores (ya construidos), la Estación Elevadora y la PTAR Canoas, razón por la cual la EAAB decidió apelar con el objeto de que se definan las responsabilidades de cada una de las partes involucradas en el proceso. Refiere entonces el documento CONPES 3320; el Plan de Desarrollo 2010-2014 Ley 1450 de 2011, art. 131.

Expediente No. 25000-23-27-000-2001-0479-01  
 Acumulados Nos. 2000-0428, 2001-0122, 2001-0343  
 Actor: GUSTAVO MOYA ÁNGEL Y OTROS  
 Acción Popular

Reitera que la empresa tiene jurisdicción en el territorio del D.C. sin perjuicio de celebrar convenios interadministrativos que puedan acometer proyectos con otras jurisdicciones. El Convenio 171 de 2007 y el Convenio de 2011. **3.9. Comparación de los costos de las soluciones de la construcción de la PTAR y de la Estación Elevadora en Tunjuelo-Canoas o Carboneras** (ver tablas 3,4 y 5 fls. 12217 (vto.) y 12218. **3.10. Informe sobre inversiones y ejecuciones realizadas por la Empresa de Acueducto y Alcantarillado de Bogotá**, Convenio 171 de 2007 ver tabla folio 12219. **3.11 Informe planes anuales de inversión y rehabilitación de redes Acueducto y Alcantarillado de Bogotá**, ver tabla 7 fl. 12.219 (vto.). **3.12. Informe del volumen, proyección de volumen, tratamiento, disposición y costos de disposición de biosólidos.** PTAR Salitre: 4.300 toneladas mensuales proyectada para 2013, fluctúa acorde con las condiciones climáticas y dilución del agua. Manejo: Proceso de deshidratación, transporte y aprovechamiento predio El Corzo utilizada la mezcla para la cobertura vegetal y recuperación del suelo degradado **3.13 Manejo y rehabilitación de las conexiones erradas en Bogotá** (respuesta 3.4). **3.14. Constitución, administración, manejo y ejecución del Fondo Cuenta Saneamiento río Bogotá constituido el 27 de diciembre de 2005** administrado por la Secretaría de Hacienda Distrital en el cual se depositan los recursos ordenados en la sentencia (ver cuadro fl. 12221.).

- Fl. 12225, CRA informe atendiendo requerimiento sobre sistema de tarifas Resolución CRA 287/04 art.

Expediente No. 25000-23-27-000-2001-0479-01  
Acumulados Nos. 2000-0428, 2001-0122, 2001-0343  
Actor: GUSTAVO MOYA ÁNGEL Y OTROS  
Acción Popular

16 parágrafos 1, 2, 3 y 4. Las modificaciones al procedimiento de fórmulas tarifarias Resolución CRA 151/01, modificada por la Resolución 271/03. Refiere en este sentido su competencia para fijar el procedimiento no así la tarifa.

- Fl. 12303 a 12355, Secretaría Distrital de Ambiente, Informe subdirección recurso hídrico y del suelo, evidencia acciones adelantadas control de vertimientos río Tunjuelo y resumen ejecutivo de las acciones de control de San Benito y Gravilleras cuenca Tunjuelo, adjunta CD con los conceptos técnicos de curtiembres y gravilleros para cada uno de los predios. Dentro de las conclusiones que plantea el informe se tiene: "(...) en la actualidad la totalidad de los industriales pasan de no contar con unidades de gestión para sus vertimientos a contar con sistemas preliminares y primarios de tratamiento (Pocetas de sedimentación, tanques de sedimentación, rejillas, trapas de grasas, tanques de tratamiento y el sistema por flotación DAF). Los cuales por su tiempo de retención disminuyen la concentración de sólidos sedimentables, grasas y aceites, sólidos totales y materia orgánica, lo que indica la tendencia positiva hacia el cumplimiento normativo a través del tiempo para los siguientes parámetros, grasas y aceites y sólidos sedimentables. "(...) Se ha observado que el sistema de tratamiento preliminar (generalmente compuesto por pozetas sedimentadoras, rejillas, filtros multimedios, trampas de grasas y presedimentadores) logra remover la mayor cantidad de cargas

Expediente No. 25000-23-27-000-2001-0479-01  
Acumulados Nos. 2000-0428, 2001-0122, 2001-0343  
Actor: GUSTAVO MOYA ÁNGEL Y OTROS  
Acción Popular

contaminantes del agua con cerca de un 93% en las aguas residuales provenientes del proceso de pelambre y un 66.73% en las demás descargas (...)" . En relación con las Gravilleras río Tunjuelo, la subdirección del recurso hídrico y del suelo, a través de las visitas de vigilancia y control ambiental a las empresas dedicadas a la trituración de material pétreo, ubicadas al margen del río Tunjuelo en las localidades de Usme y Ciudad Bolívar, específicamente en el tramo comprendido desde la descarga de la quebrada Yomasa hasta la entrada al relleno sanitario Doña Juana, tiene identificadas cuatro grandes zonas en las que se llevan a cabo este tipo de actividades. Concluye el informe: "6.1 Para el tramo comprendido desde la descarga de la Quebrada Yomasa al río Tunjuelo hasta el puente de la Avenida Boyacá entrando al relleno sanitario Doña Juana, se concentran aproximadamente once plantas de beneficio de material pétreo, las cuales se encuentran divididas así: Se encuentran dos (2) plantas de beneficio en el predio Cantarrana y seis (6) en el predio La Perdigona, para un total de ocho (8) plantas en la localidad de Usme. En el predio El Rubí, propiedad de la sociedad equipos Universal, se encuentran un total de tres (3) plantas de beneficio ubicadas en la localidad de Ciudad Bolívar. 6.2 La Subdirección del recurso hídrico y del suelo (antes Oficina de Control de Calidad y uso del agua) ha ejecutado las acciones de evaluación control y seguimiento ambiental generando un total de 33 actuaciones técnicas comprendidas entre conceptos, e informes técnicos (...)" Dentro de

Expediente No. 25000-23-27-000-2001-0479-01  
Acumulados Nos. 2000-0428, 2001-0122, 2001-0343  
Actor: GUSTAVO MOYA ÁNGEL Y OTROS  
Acción Popular

las funciones de control y vigilancia señala que la Dirección de Control Ambiental de la Secretaría Distrital de Ambiente, ha proferido los actos administrativos que en derecho corresponden y de acuerdo con los conceptos técnicos proferidos por la subdirección del recurso hídrico y del suelo, y en cumplimiento de las normas ambientales que regulan la materia de vertimientos y en pro de la protección del río Tunjuelo, señala que dentro de las gestiones adelantadas también ejerce actividades de evaluación y seguimiento sobre los establecimientos de comercio, con el fin de que se ajusten al cumplimiento de los lineamientos técnicos y jurídicos que rigen la materia.

- Fl. 12356, EMGESA Informe anexo con 117 folios respuesta a requerimiento de 21 de noviembre de 2012.
- Fls.12359 a 12393, Departamento Nacional de Planeación y Dirección de Regalías del Departamento Nacional en Liquidación, da respuesta requerimiento judicial contenido oficio 9912 de 22 de noviembre de 2012. -Anexa copia del acuerdo 071 de 28 de diciembre de 2011, "Por el cual se aprueban proyectos para ser financiados con recursos del Fondo Nacional de Regalías y se asigna su ejecutor"- Informe sobre el esquema de financiación del Programa de Saneamiento del Río Bogotá componente y monto de la proyección de inversiones "Descripción General del Modelo Financiero (Modelo PTAR Canoas y modelo PTAR Salitre)- supuestos macroeconómicos. Inversión aproximada Programa de saneamiento Río Bogotá, 5.92 billones de pesos para el año 2012. Ver

Expediente No. 25000-23-27-000-2001-0479-01  
Acumulados Nos. 2000-0428, 2001-0122, 2001-0343  
Actor: GUSTAVO MOYA ÁNGEL Y OTROS  
Acción Popular

CD incluye proyectos autorizados DNP incluida PTAR Canoas.

- Fl. 12394, la CAR da respuesta al requerimiento incorporada al proceso como anexo 2 del cuaderno 19.
- Fl. 12432 a 12443, Función de Advertencia de la Contraloría General de la República sobre el Acuerdo 22 de febrero de 2011 Programa Saneamiento Río Bogotá. Considera la Contraloría que la contratación que realmente se va a efectuar, el sitio en donde se pretende ubicar la PTAR Canoas, la planta o estación de bombeo elevadora ya no sería una obra puntual y relativamente pequeña como se le hizo ver al Tribunal de Cundinamarca, por el contrario, de los planos anexos a la invitación pública ICSM-0731-2009 cursada por la Empresa, tal planta elevadora deberá tener la capacidad de vencer la gravedad de una masa de aguas residuales hasta de  $37\text{m}^3/\text{s}$  en 46 metros de bombeo vertical, además representa la mayor excavación y construcción de estructuras subterráneas para dos pozos circulares de 44m y 53m de diámetro separados por 70M e interconectados por un túnel adicional, con capacidad para la instalación de rejillas de cribado y el segundo para la instalación y funcionamiento de hasta seis bombas cada una con capacidad de hasta  $5.5\text{M}^3/\text{s}$ . Razón por la cual advierte que de presentarse un fallo confirmatorio la empresa estaría llevando a una tergiversación del contenido de la sentencia en cuanto la modalidad de las obras a contratar, ya que de una estación elevadora de 5M de altura de bombeo, en la práctica, el cumplimiento de la sentencia judicial, se vería forzado a que

Expediente No. 25000-23-27-000-2001-0479-01  
Acumulados Nos. 2000-0428, 2001-0122, 2001-0343  
Actor: GUSTAVO MOYA ÁNGEL Y OTROS  
Acción Popular

fiscalmente se sufragaran los costos del túnel realmente ejecutado que implica el mayor valor resultante de la diferencia en la altura de bombeo y obras concomitantes anteriormente indicadas (fl. 12438). Agrega la Contraloría que el acometer de tal manera la obra propuesta conduce a la utilización del túnel de emergencia de forma permanente, por otra parte no garantiza ningún tratamiento sobre las aguas contaminadas que son aisladas durante un trayecto del río Bogotá, pero que aguas más abajo resultan vertidas de forma más gravosa para el medio ambiente, porque se ha cerrado un trayecto sobre superficie que puede incidir positivamente en las posibilidades de auto recuperación del río; pues el ente fiscalizador no concuerda con la consideración de la EAAB de señalar que el río tiene "nula capacidad de autodepuración". Ello, señala la Contraloría puede implicar una afectación del patrimonio público y de los recursos naturales renovables porque: La invitación pública se efectuó antes de la sentencia definitiva y sin tener certeza sobre la existencia de la financiación de la PTAR Canoas, del interceptor Canoas-Alicahín ni de la estación elevadora de Canoas, el presupuesto podría resultar insuficiente para respaldar las cifras que allí se comprometieron. En estos términos llama la atención que la Empresa comprometió recursos que llegan de manera preliminar a los cuatrocientos mil millones de pesos para la construcción del interceptor Tunjuelo-Canoas, así como los recursos a invertir en la estación de bombeo de aguas residuales en Canoas que cuentan con un presupuesto

**Expediente No. 25000-23-27-000-2001-0479-01**  
**Acumulados Nos. 2000-0428, 2001-0122, 2001-0343**  
**Actor: GUSTAVO MOYA ÁNGEL Y OTROS**  
**Acción Popular**

oficial de US\$81.164.268 dólares y (\$32.799.973.422 pesos), sin que obre coordinación interinstitucional, así como una discusión técnica, académica, científica y pública sobre la pertinencia de obras que antes de tratar el recurso hídrico en torno a su descontaminación, lo que hacen es trasladar la problemática kilómetros más abajo. Esta segunda obra se encuentra suspendida y a juicio de la CGR debió ser estudiada a cabalidad antes de siquiera haberse iniciado. Ello conduce a que sin contar con la financiación de la Mega planta de Tratamiento Canoas, las aguas residuales conducidas por el sistema de interconectores terminen utilizando el desfogue de emergencia que por gravedad entrega las aguas residuales después de las compuertas de Alicachín, sin ningún tratamiento, en el Acuerdo firmado se condiciona una decisión futura de la Car sobre concesión de agua a EMGESA con el consecuente riesgo de elusión de la responsabilidad sobre la contaminación que en ese caso, no se alcanzaría a cubrir con la posible auto recuperación del río hasta Girardot, generando una amenaza hasta para el río grande de la Magdalena. En estos términos la Contraloría concluye que el Programa de Saneamiento del río Bogotá posee un alto grado de incertidumbre toda vez que las fuentes de financiación establecidas en el Acuerdo firmado el 22 de febrero de 2011 no cuentan con un soporte financiero, presupuestal, técnico y legal suficiente y siguen siendo las presentadas al ente de control hace más de dos años sin que se presenten fórmulas diferentes para garantizar su efectiva apropiación,

Expediente No. 25000-23-27-000-2001-0479-01  
Acumulados Nos. 2000-0428, 2001-0122, 2001-0343  
Actor: GUSTAVO MOYA ÁNGEL Y OTROS  
Acción Popular

ni conocer el proyecto definitivo ni las licencias respectivas. Finalmente advierte sobre el impacto a la tarifa de alcantarillado o a los excedentes financieros de la Empresa por la obra suspendida.

- Fl. 12445, Ministerio de Ambiente y Desarrollo Sostenible remite la solicitud a la Autoridad Nacional de Licencias Ambientales, Decreto 3573 de 2011.
- Fl. 12448 a 12455, el Departamento de Cundinamarca adjunta informe de la Gerente de las Empresas Públicas del Departamento sobre acompañamiento recepción de las plantas de tratamiento de aguas residuales por los municipios, advierte que el Gobierno Nacional no ha hecho un pronunciamiento sobre el manejo presupuestal y financiero de los costos de operación de las mismas por los municipios, pues la CRA mantiene el mismo sistema tarifario.
- Fl. 12457, el Departamento de Cundinamarca memorial anexa Plano de usos del suelo del río Bogotá con su estratificación. Ver DVD folio 12457A.
- Folios 12458 a 12459, el municipio de Sibaté, allega documentación y certificaciones relacionadas con el requerimiento punto 8° del oficio de fecha 6 de septiembre de 2011, destaca PMAA que incluye colectores de aguas lluvias y del proyecto radicado ante el Ministerio de Ambiente y Desarrollo Sostenible para la financiación del mismo. Destaca que a través de mesas de trabajo se está concretando cronograma para que las empresas sancionadas por el bombeo de aguas contaminadas compensen con la construcción y puesta en marcha de las plantas de

Expediente No. 25000-23-27-000-2001-0479-01  
Acumulados Nos. 2000-0428, 2001-0122, 2001-0343  
Actor: GUSTAVO MOYA ÁNGEL Y OTROS  
Acción Popular

tratamiento de aguas residuales incluyendo obras de conducción, proyectado para su entrega en el año 2014. Llama la atención que del presupuesto de rentas y gastos de 2012 el municipio apropió el 3.84% con destino al sector denominado agua potable y saneamiento básico, que representa el 4.85% de los gastos de inversión.

- Fl. 12496, el Ministerio de Minas y Energía en respuesta al oficio 9919 de 22 de noviembre de 2012, informa sobre los proyectos, recursos disponibles y vigencias asignadas a proyectos de saneamiento del río Bogotá, requisitos y cumplimiento de los mismos. Agrega que hecha la revisión de los proyectos hechos en el BPIN (Banco de Proyectos de Inversión), en los últimos años, no se encontraron proyectos relacionados con el saneamiento del río Bogotá y sobre el proceso de liquidación del FNR, remitió el requerimiento a la Dirección de regalías del Departamento Nacional de Planeación, entidad competente.
- 12499, la EAAB presenta informe requerido en auto de 15 de noviembre de 2012. Precisa que hay que diferenciar el proyecto de saneamiento del río Bogotá y el Programa de Tratamiento de las aguas residuales de la ciudad de Bogotá, éste último es un programa interinstitucional en el cual intervienen entidades del orden nacional , departamental y municipal así como empresas privadas , cuyo objeto es la recuperación del río Bogotá y su cuenca hidrográfica desde el nacimiento en Villapinzón hasta su desembocadura en Girardot, incluye múltiples actores y diversidad de responsables;

Expediente No. 25000-23-27-000-2001-0479-01  
Acumulados Nos. 2000-0428, 2001-0122, 2001-0343  
Actor: GUSTAVO MOYA ÁNGEL Y OTROS  
Acción Popular

comprende restauración de páramos y cuencas altas, control de erosión, regulación de caudales, control de inundaciones, adecuación hidráulica, control de vertimientos, tratamiento de aguas residuales domésticas e industriales, control de la minería, control de insumos agropecuarios, etc. El tratamiento de aguas residuales forma parte del programa de saneamiento del río Bogotá y se limita a la construcción y operación de plantas de tratamiento de aguas residuales urbanas PTARS y del sistema de interceptores que conducen las aguas residuales desde la ciudad o municipio hasta la PTAR. Dentro de este esquema la empresa se refiere al Sistema de Tratamiento de Aguas Residuales.

- Fl. 12513, la EPM da respuesta requerimiento oficio 9920 de 30 nov. 2012, manejo biosólidos. Afirma que en la PTAR San Fernando se han generado entre el 1º de enero y el 31 de octubre de 2012, 25.277.31 Toneladas de biosólidos con un promedio de 2.527.7 TON/MES. Este volumen es directamente proporcional al agua tratada lo que permite afirmar que para el 2013 se generarán 31.242.76 Toneladas. Los biosólidos se obtienen a partir de digestión anaerobia utilizada para estabilizar los lodos producto del tratamiento de aguas residuales. El biogás obtenido se inyecta a los motogeneradores, generando en diez meses 4.565.059 KWH autoconsumidos. PTAR San Fernando \$825.455.322. Gastos de Transporte: \$511.548.556; espesamiento y deshidratación: \$355.843.818 y consumo de energía \$241.137.145.

Expediente No. 25000-23-27-000-2001-0479-01  
Acumulados Nos. 2000-0428, 2001-0122, 2001-0343  
Actor: GUSTAVO MOYA ÁNGEL Y OTROS  
Acción Popular

- Fl. 12514, el Municipio Chocontá, justifica inasistencia y responde requerimiento auto 15 nov. 2012: -Avances construcción redes acueducto y alcantarillado eje urbano; -Informe curtiembres municipio: listado Chocontá y Villapinzón entregado a la UMATA Chocontá; -No cuenta con información sobre curtiembres en operación, cuáles cerradas, cuáles tienen plan de manejo y cuáles no.- Tampoco cuenta con censo de la población que se dedica a esta actividad ni de su caracterización económica.- Sobre las actuaciones desarrolladas para la determinación y ubicación del polígono industrial para la relocalización de curtiembres existe la Unidad de Planificación rural que además requiere aprobación de la CAR pero a la fecha no ha respondido.
- Fl. 12516, el Municipio de Chocontá presenta informe requerimiento sobre las redes de Acueducto y Alcantarillado urbano: contrato construcción redes con recursos CAR; contrato obra 034/12 por \$14.313.000 en reemplazo red de alcantarillado sanitario barrio Los Prados; redes de agua potables en CVC al 100% y pendiente la entrega de diseños PMAA que adelanta la Gobernación de Cundinamarca para luego ser aprobado por el Ministerio con el objeto de viabilizar los recursos de implementación y ejecución anexa cuadros a folios 12520 a 12529.
- Fl. 12530, el municipio de Sesquilé, informa sobre el contrato suscrito con el Departamento -PMA urbano, para lo cual requerirá a las EPC sobre el avance del contrato.; informa igualmente sobre el proceso de contratación del sistema eléctrico de la

Expediente No. 25000-23-27-000-2001-0479-01  
Acumulados Nos. 2000-0428, 2001-0122, 2001-0343  
Actor: GUSTAVO MOYA ÁNGEL Y OTROS  
Acción Popular

PTAR del municipio y el estado actual de la operación frente al hurto del transformador de la PTAR, ante la aseguradora y CODENSA para su consecución y ubicación.

- Fl. 12531 a 12669, en atención al auto de 15 de noviembre de 2012, la Car complementa respuesta de 30 de noviembre de 2012: -Acta de liquidación contrato 735/09 COA 6579-BID "Diseños de detalle para la construcción de obras de saneamiento en los municipios Cuenca río Bogotá, paquete I" y acta de liquidación contrato 543 de 2010, COA 6925-BID "Diseños de detalle para la construcción de obras de saneamiento en los municipios de la cuenca del río Bogotá, paquete II" Ejecución: marco Convenio ATN/OC10208-CO BID (1); - Certificado del pago por el DC y los municipios de la tasa retributiva y permisos de vertimiento, anexa la correspondiente relación de pagos (2) (fl. 12543. -Plan mitigación inundaciones: Resumen Plan Acción Trienal 2007-2009; la relación de contratos suscritos Colombia Humanitaria mitigación inundaciones ola invernal (4); -Obras de dragado, adjudicación licitación pública LPN-BM-01 2011 (6); recuperación ronda del río Acuerdos Nos. 17 y 30/09, determinan la ronda técnica del río Bogotá y las zonas de utilidad pública del proyecto (8) (ver folio 12567); - Metodología para calcular el caudal ecológico y el calculado para el Salto de Tequendama (19);- La Car no ha determinado el caudal ecológico para el sector Compuertas Alicachín -Salto de Tequendama ni adoptado metodología alguna. Viene adelantando algunos procesos, el Ministerio de Ambiente y

Expediente No. 25000-23-27-000-2001-0479-01  
Acumulados Nos. 2000-0428, 2001-0122, 2001-0343  
Actor: GUSTAVO MOYA ÁNGEL Y OTROS  
Acción Popular

Desarrollo Sostenible expidió la Resolución 865/04 relacionada con la metodología , índice de escasez y en el punto 3.4.2 reducción por caudal ecológico para ser tenidos en el Plan de Acción 2012-2015. - Indica que corresponde a la autoridad ambiental estudiar las condiciones particulares de sus cuencas y escoger una o varias metodologías que se ajusten a dichas condiciones y la información disponible.-La Car cuenta con una red Hidrometeorológica con 150 estaciones distribuidas en toda la jurisdicción que monitorea el comportamiento de las condiciones climatológicas e hidrológicas de la cuenca. -Informe sobre los procesos sancionatorios ver cuadro fls. 12533 y 12534.

- Fl. 12670, la Unidad Administrativa Catastro Distrital, remite copia plano catastral actualizado, loteo cauce río Bogotá, con una distancia de 300 mts. a lado y lado, responde oficio 9934.
- Fl. 12672 la EAAB da respuesta a las afirmaciones hechas por EMGESA.
- Fl. 12678 el Municipio de Gachancipá da respuesta al oficio 9924 de noviembre 22 de 2012, allega informe estado actual PTAR municipio transferida Resolución CAR 2266 de 21 de septiembre de 2012, la cual se compone de una infraestructura física y el predio denominado Planta de Tratamiento bajo el mecanismo "APORTES BAJO CONDICION", informe sobre el contrato suscrito con el Departamento "Tratamiento aguas residuales". Vinculación al Plan Departamental de Aguas que comprometió el 60% de los recursos del SGP de agua potable y saneamiento básico 2009-2034. El 15 de julio de 2009 suscribió con las EPC el

**Expediente No. 25000-23-27-000-2001-0479-01**  
**Acumulados Nos. 2000-0428, 2001-0122, 2001-0343**  
**Actor: GUSTAVO MOYA ÁNGEL Y OTROS**  
**Acción Popular**

Convenio de cooperación y apoyo financiero para la vinculación del municipio de Gachancipá al Plan Departamental de Aguas. Formulación PMA: estudio, diseño y construcción red de alcantarillado San Martín, El Roble, Centro-Sector Betania y Roble Sur.

- Fl. 12689, coadyuvante segunda instancia, María José Páez Díaz, cuestiona intervención entidades públicas audiencia y hace propuestas. Reitera argumentos memorial 5 de junio de 2012 en 183 folios y hace un cuestionamiento a la intervención de las autoridades públicas en la audiencia y a la posible solución técnica.
- Fl. 12693, Municipio Villapinzón, i) Informe Plan Maestro: Convenio Asociación No. 236/06; contrato 039 de 22-nov-2006; Acuerdo 010/08 autorizó al alcalde a vincularse al Plan Departamental para el manejo empresarial de los servicios de agua y saneamiento -PDA-; EPC contrató la firma CONTELAC LTDA. actualización Planes Maestros de Acueducto y Alcantarillado; contrato CAR 745-09; mediante oficio DA-100-728 de 18-X-2012 el municipio radicó ante la CAR, estudios y diseños construcción PTAR con el fin de solicitar recursos; Acuerdo 029/09 el Concejo Municipal facultó al alcalde declarar de utilidad pública e interés social el predio o predios necesarios para la construcción de la PTAR y adelantar el proceso de adquisición de dichos inmuebles. ii) Situación de las curtiembres, corresponde a la CAR por lo cual remite el listado enviado por la CAR en lo relativo a Curtiembres de octubre de 2012; relaciona el censo de las personas que se dedican a esta actividad y las actividades

Expediente No. 25000-23-27-000-2001-0479-01  
Acumulados Nos. 2000-0428, 2001-0122, 2001-0343  
Actor: GUSTAVO MOYA ÁNGEL Y OTROS  
Acción Popular

que ha realizado el municipio respecto de esta misma actividad; Presenta el trámite del Proyecto esquema OT. Aprobado por el Acuerdo 09 de 31 de agosto de 2011 adoptando polígonos de exclusión según el Acuerdo 017 CAR que regula la ronda hídrica del río Bogotá. Estudio y formulación UPR que permite el desarrollo como actividad industrial en los polígonos, distribución interna, espacios de la PTAR, relleno sanitario y demás actividades de saneamiento ambiental; estudios futuro parque industrial dentro de la zona UPR; informe sobre la ejecutoria de los actos administrativos sancionatorios (ver cuadros hasta fl. 12710 y demás anexos fl. 12745).

- Fl. 12754 a 12798, el municipio de Chocontá informa sobre las obras ejecutadas en saneamiento, certificación usos suelo, CD plano usos suelo y cauce río, copia presupuesto vigencia 2012.
- Anexo 1. EMGESA, allega documentos requeridos, Informe fotográfico Embalse del Muña; reducción problemas sanitarios y de salubridad municipio de Sibaté; relación empresas e industrias cercanas al embalse; alcance concesión otorgada por la CAR a Emgesa. (Resoluciones 603 /97 y 1014/98). Caudal río Bogotá bombeado embalse- Caudal Ecológico. Protocolo Compuertas Alicachín; Convenio EEB - EMGESA (oct. 97) caudales Chingaza-río Blanco; Convenio 171/07; Acuerdo de Cooperación 21-02-2011; Acuerdo 071/11 Departamento Nacional de Planeación.

Expediente No. 25000-23-27-000-2001-0479-01  
Acumulados Nos. 2000-0428, 2001-0122, 2001-0343  
Actor: GUSTAVO MOYA ÁNGEL Y OTROS  
Acción Popular

- Anexo 2, la CAR en respuesta a requerimiento auto 15-nov. 2012, marco legal: corresponde a la CAR diseñar un "Plan de Gestión Ambiental Regional" PGAR- dentro del marco de la Constitución Política, el Plan nacional de Desarrollo, el Plan de Desarrollo Departamental, Plan de Desarrollo Municipal, POT Departamental y POT municipal; así como de los Planes de Ordenamiento de Cuenca. Marco jurídico: CONPES 3320/04, Ley 99/93, Acuerdo CAR 043/06 y los Planes de Desarrollo 2006-2010 y 2011-2014, Acuerdo 071/07. Informe entrega PTAR municipios remitidos a la SISPD el 29 de octubre de 2010 anexo en 7 cd; Proyecto de Adecuación Hidráulica y recuperación ambiental Río Bogotá de la CAR estructurado en cuatro componentes:-Ampliación PTAR Salitre, Adecuación hidráulica y mejoramiento ambiental, manejo integrado de la cuenca, administración y gerencia, recursos (ver págs. 42 y 43 de la respuesta); procesos adelantados por infracciones; actas entrega PTARS.
- Fls. 12799 a 12986, Municipio Zipaquirá da cumplimiento de los autos de 6 de septiembre/11 y 15 de noviembre/12, ordenados en oficio 9993 de 22 de noviembre de 2012 (184 folios y un CD), CD información POMCA río Bogotá; Información manejo zonas verdes, parques, campañas de limpieza en fuentes hídricas, acciones PSMV, residuos, cumplimiento PGIRS e

Expediente No. 25000-23-27-000-2001-0479-01  
Acumulados Nos. 2000-0428, 2001-0122, 2001-0343  
Actor: GUSTAVO MOYA ÁNGEL Y OTROS  
Acción Popular

indicadores de calidad del agua vigencia 2012, marco POMCA río Bogotá.

- Fl. 12987, EMCALI remite informe manejo biosólidos PTAR: manejo del producto y disposición del material. El tratamiento del biosólido se efectúa a través de: secado (solar) Sistema Green House: incremento de temperatura y aireación energía solar (efecto invernadero). Informa que actualmente se discute proyecto de norma entre el Ministerio de Agricultura y el Ministerio de Ambiente.
- Fl. 13002, la Agencia Nacional de Licencias Ambientales, ANLA, realiza precisiones respecto de cada uno de los requerimientos formulados: - modificación licencia ampliación y optimización PTAR Salitre , adelantar Proyecto PTAR CANOAS y EE a solicitud EAAB (Resolución 817 de 24 de julio de 1996) Fue modificada por resoluciones 577 de 12 de junio de 2000, 821 de 17 de agosto de 2000 y 362 de 8 de mayo de 2001, siempre circunscrita a la PTAR Salitre Sólo la Resolución 1929 de 1 de noviembre de 2007, a petición de la EAAB, el Ministerio de Ambiente, Vivienda y Desarrollo Territorial modificó la Resolución 577/00 en el sentido de ajustar el Plan de Cumplimiento establecido en el artículo 2 para la ampliación a 8m<sup>3</sup>/s y la construcción de la segunda fase de la PTAR Salitre. En relación con la PTAR Canoas acorde con oficio remitido por la empresa de Acueducto y Alcantarillado de Bogotá, EAAB, No. 2420020121739 de agosto 2 de 2012, se están

Expediente No. 25000-23-27-000-2001-0479-01  
Acumulados Nos. 2000-0428, 2001-0122, 2001-0343  
Actor: GUSTAVO MOYA ÁNGEL Y OTROS  
Acción Popular

evaluando las diferentes alternativas para la ubicación por parte de esta empresa , pero aún no se tiene decisión definitiva sobre CANOAS, FUCHA y TUNJUELO, no se ha registrado solicitud alguna de modificación del proyecto o solicitud de licencia para la construcción de la PTAR Canoas porque la EAAB no ha adoptado la decisión técnica definitiva. Carece de competencia para el manejo de residuos sólidos -biosólidos.

- Fl. 13004 el Departamento Nacional de Planeación, anexa respuesta requerimiento oficio 9912/12, refiere el Acuerdo 071: descripción modelo financiero PTAR Canoas, estimación fuentes identificadas: Nación - Gobernación, Fase I y Fase II.
- Fl. 13025 a 13032, Jaime Castro, reflexiones sobre la naturaleza jurídica del pacto de cumplimiento; competencia del juez en acción popular: dar órdenes de dar o hacer, la solución técnica debe ser proferida por la autoridad administrativa competente mediante el acto administrativo correspondiente.
- Fl. 13033, el alcalde del municipio de Nilo, estima que el requerimiento efectuado por el Consejo de Estado es improcedente porque no es municipio ribereño del río Bogotá.
- Fl. 13049, La empresa de servicios públicos de Sopó- EMSERSOPO, refiere la implementación planes maestros de acueducto y alcantarillado; obras realizadas en el municipio de Sopó, presupuesto destinado a saneamiento

Expediente No. 25000-23-27-000-2001-0479-01  
Acumulados Nos. 2000-0428, 2001-0122, 2001-0343  
Actor: GUSTAVO MOYA ÁNGEL Y OTROS  
Acción Popular

construcción y adecuación SAA.- Plano usos suelo.

- Fl. 13062, el Ministerio de minas y Energía da alcance respuesta oficio 9919, estado liquidación FNR, adjunta oficio Directora Regalías.
- Fl. 13070, el Ministerio de Ambiente, atiende requerimiento de acuerdo Memorando 8320-4-57783 y 8240-3-60214 Dirección Integral del Recurso Hídrico y Dirección de Asuntos Ambientales Sectorial y Urbana del Ministerio, para lo cual remite los citados memorandos: reuso de agua Convenio 24/12 Univalle; metodología calcular caudal ecológico cuenca río Bogotá, cuenta con una versión preliminar sobre el Proyecto de Reglamentación del caudal ambiental el cual se estudiará una vez sea ajustada la metodología existente para calcular el caudal ambiental proyecto que adelanta la Universidad Nacional de Colombia; talleres socialización información sector hidroenergético; mapa zonas excluibles de la Minería Sabana de Bogotá y áreas compatibles con la minería en la Sabana de Bogotá. La Resolución que debe reemplazar la 1197 /04 (declarada nula por el Consejo de Estado) se encuentra en revisión jurídica por parte del Ministerio, una vez aprobado será sometida a los comentarios de la ciudadanía a través de la página WEB.
- Fl. 13076, el Consorcio Canoas atiende requerimiento numeral 9 providencia octubre 29/12, informe actuaciones desplegadas:

Expediente No. 25000-23-27-000-2001-0479-01  
 Acumulados Nos. 2000-0428, 2001-0122, 2001-0343  
 Actor: GUSTAVO MOYA ÁNGEL Y OTROS  
 Acción Popular

Pendiente de construir ITC 12 y extracción máquinas tuneladoras. Para su construcción se requiere: entrega predio INVIAS por la EAAB. Propone construcción pozo 65m de diámetro que recogería las funciones tanto de cribado como de succión en reemplazo del ITC12, pero se requiere actualizar el precio del costo directo de la época más ajuste por fórmula y el AIU del contrato, lo cual permite poner en funcionamiento el sistema mientras se construye la Estación Elevadora. A 24 de enero de 2013 no se ha tomado ninguna determinación al respecto, el acueducto no hizo entrega del predio, las máquinas están enterradas y el sistema sin posibilidad de ponerse en operación. Pendiente de liquidar el contrato. Agrega que las estructuras ITC 9 e ITC 11 No son indispensables ni necesarias para el correcto funcionamiento de la obra y para la puesta en funcionamiento del sistema en general. Adjunta acta reunión con la empresa y acta de terminación parcial contrato 1-01-25506-111-2009.

- Fl. 13173 a 13352, el municipio de Chía, por medio de apoderada presenta informe al requerimiento: -Cumplimiento convenio Interadministrativo 00335 29-06-2011 y contrato de interventoría obras- sobre adquisición predios; estado actual operación PTAR y plan para contratar una segunda planta para el municipio; recibo PTAR Chía 1 de la CAR el 1 de noviembre de 2012, adelanta el Plan

Expediente No. 25000-23-27-000-2001-0479-01  
Acumulados Nos. 2000-0428, 2001-0122, 2001-0343  
Actor: GUSTAVO MOYA ÁNGEL Y OTROS  
Acción Popular

Mejoramiento y optimización PTAR CHIA 1 incluye obras de protección contra ola invernal, realiza una caracterización técnica para conocer el estado real de la PTAR CHIA 1 pues se desconoce y no se recibió caracterización ni estado actual de la laguna; segunda PTAR informe rendido por la Secretaría de Planeación del Municipio de Chía en el cual se solicita a la CAR los estudios de detalle, informe sobre los usos del suelo sector Universidad de la Sabana, zona suburbana especial y zona de ronda de ríos. Describe POT Acuerdo 17 /00; informa las actuaciones desarrolladas para la mitigación de los riesgos por inundación en el sector de la Universidad de la Sabana; las actividades mantenimiento y recuperación río Bogotá, limpieza y mantenimiento manual Convenio CAR, Defensa Civil, Ejército Nacional, Policía Nacional, DEVINORTE y Municipio de Chía, retiro árboles forman tambres y retiro de desechos.

- Fl. 13354 a 13398, memorial apoderado de la EAAB, anexa documento remitido por la Gerencia Corporativa del Sistema Maestro de la EAAB remitido a la interventoría de regalías indirectas del Departamento Nacional de Planeación, términos de referencia contratación Estación Elevadora de aguas residuales Canoas con el objeto de cumplir con el requisito exigido para el giro de los recursos FNR al Programa de Saneamiento del Río Bogotá; pone a disposición las actas parciales contrato y

Expediente No. 25000-23-27-000-2001-0479-01  
Acumulados Nos. 2000-0428, 2001-0122, 2001-0343  
Actor: GUSTAVO MOYA ÁNGEL Y OTROS  
Acción Popular

posible acuerdo con el contratista para culminar las obras; informe técnico acciones ejecutada EAAB en cumplimiento orden impartida C. de E. levantamiento medida cautelar de fecha 4 de diciembre de 2012; respecto entrega predio INVIAS como éste cuenta con licencia de intervención del espacio público es viable continuar con la obra de saneamiento; no ha sido posible lograr acuerdo sobre la solución técnica de la propuesta del Consorcio Canoas del Pozo de 65 mts no es más económica. Sí se requiere la construcción de los ITC 9 y 11 para mayor ventilación y mantenimiento del túnel y además el ITC 9 se requiere como futura conexión para captar aguas residuales del sector, situación contemplada en los diseños presentados y no objetados por la interventoría; trámite ocupación cauce sector El Charquito se radicó ante la CAR permiso ocupación cauce permita finalizar la estructura de entrega del TE y el interceptor T-C, a la espera respuesta CAR. El 16 de enero de 2013 la EAAB solicitó el informe sobre la actualización del trámite sin respuesta todavía. Pone de presente que la empresa no ha realizado obras por fuera de lo permitido por la autoridad judicial que puedan impedir fallo de segunda instancia.

- Fl. 13418 a 1424, la Gobernación de Cundinamarca, presenta informe epidemiología áreas que circundan la cuenca del río Bogotá y sus afluentes

Expediente No. 25000-23-27-000-2001-0479-01  
Acumulados Nos. 2000-0428, 2001-0122, 2001-0343  
Actor: GUSTAVO MOYA ÁNGEL Y OTROS  
Acción Popular

- Fl. 13663 a 13669 Acta de reunión de comité de Verificación del Tribunal Administrativo de Cundinamarca.
- Fl. 13671, la Contraloría General de la República, anexa resultados auditoría de gestión sobre el Río Bogotá intersectorial y articulada. (un anexo)
- Fl. 13672 a 13704, memorial Ministerio de Minas y Energía. Anexo 1 Auditoría Especial sobre la gestión río Bogotá, intersectorial y articulada. La Contraloría presenta la problemática general del río Bogotá, relaciona los documentos CONPES 3320 y la Política Nacional del Recurso Hídrico. Concluye: - Incumplimiento de las políticas es generalizado; -No se han definido priorizaciones; no se cumple el PSMV (Resolución 1433/04 y 2145/05); falta armonización de los instrumentos regulatorios del recurso hídrico; falta coherencia en los planes de desarrollo municipales. Se hace necesario aplicar el instrumento denominado "caudal ecológico y ambiental" para garantizar la sostenibilidad de la cuenca pues en gran parte del país los derechos de agua se encuentran otorgados.
- Propuesta: 1.- Gobernanza del recurso hídrico en la cuenca, entendido como un proceso formal e informal de interacción entre actores para la conducción de una sociedad. Integrado por reglas y procedimientos que configuran un marco institucional en el cual los diversos actores

Expediente No. 25000-23-27-000-2001-0479-01  
Acumulados Nos. 2000-0428, 2001-0122, 2001-0343  
Actor: GUSTAVO MOYA ÁNGEL Y OTROS  
Acción Popular

tienen que operar. Permitiría suplir la inexistencia de un organismo de la cuenca con suficiente sustento legal para gerenciar la misma.

- En Minería, advierte sobre los pasivos ambientales y el riesgo de incrementarlos por la minería que se desarrolla a lo largo de la cuenca, que además origina conflictos por contaminación por la explotación o usos del suelo lo cual se refleja en el POT de algunos municipios; falta coherencia entre la normatividad ambiental y la normatividad minera lo cual genera diferencia de criterios que a su vez da lugar a desconfianza entre los empresarios mineros y la población en general, así como en la necesidad de realizar acciones correctivas y preventivas; no existen estudios evalúen el impacto de la actividad minera y su incidencia en la calidad del agua (ejemplo la minería a cielo abierto impacta aire y agua); se trata de una minería de subsistencia que plantea de por sí una problemática social compleja.
- Fl. 13717 a 13756, la señora María José Páez Díaz, coadyuvante, reitera argumentos coadyuvancia, incorpora acta visita técnica realizada por el comité de verificación creado en primera instancia, propone la alternativa de Carboneras como de menor impacto ambiental municipio de Soacha.
- Fl. 13769 a 13772, Acta Comité Verificación.

Expediente No. 25000-23-27-000-2001-0479-01  
Acumulados Nos. 2000-0428, 2001-0122, 2001-0343  
Actor: GUSTAVO MOYA ÁNGEL Y OTROS  
Acción Popular

- Fl. 13847 a 13871, Acta original visita 13 febrero de 2013.
- Fl. 13938, el municipio de Chocontá presenta respuesta al requerimiento oficio 537

A continuación se desarrollarán los tres (3) componentes que hacen parte del Plan de Gestión de esta decisión, tal y como se describieron en el acápite "*Planteamiento del problema*" y en el marco lógico antes expuesto.

#### 1.4.3. COMPONENTE I

##### MEJORAMIENTO AMBIENTAL Y SOCIAL DE LA CUENCA HIDROGRÁFICA DEL RÍO BOGOTÁ

###### I.4.3.1 - CONSIDERACIONES PRELIMINARES

La Cuenca Hidrográfica del río Bogotá es una de las más importantes zonas de asentamiento y desarrollo en Colombia.

Por una parte, el crecimiento poblacional en la ciudad es una realidad inocultable, las circunstancias políticas, sociales y de seguridad son su principal justificación. A medida que la población crece la demanda y presión por el recurso hídrico aumenta de manera exponencial teniendo en cuenta los diferentes usos y necesidades (*consumo humano y doméstico; agropecuario; generación de energía; uso industrial; recreativo, entre otras*).

Las cifras son reveladoras, en el 2010 y tan solo en Bogotá la ciudad tenía una población de 7.363.782 habitantes de los cuales 7.347.795 se encontraban en el área urbana, con una densidad poblacional de 4.146

**Expediente No. 25000-23-27-000-2001-0479-01**  
**Acumulados Nos. 2000-0428, 2001-0122, 2001-0343**  
**Actor: GUSTAVO MOYA ÁNGEL Y OTROS**  
**Acción Popular**

habitantes por kilómetro cuadrado, de acuerdo con las cifras presentadas por el Departamento Administrativo Nacional de Estadística<sup>97</sup>.

En la actualidad en Bogotá hay 7.647.366 habitantes y según las proyecciones para el 2020 la población ascenderá a 8.380.801.

En Cundinamarca, el DANE estima que la población para el 2020 será de 2.887.005, la cual sumada con los de Bogotá sería de no menos de 11.267.806 de habitantes, 19% de la población total de Colombia, supuesto de hecho relevante y preocupante en materia de gestión del agua en la cuenca en comento.

De otro lado y en materia de desarrollo, el río Bogotá se ha convertido en la estructura económica más diversificada del país, la cual se encuentra directamente relacionada con actividades de explotación y utilización de los recursos naturales. Actividades agropecuarias, mineras e industriales predominan en la misma.

Es de resaltar que el agua es parte integrante y potencializadora del desarrollo económico de una ciudad, el manejo del recurso hídrico contribuye con el mejoramiento de los índices de erradicación de la pobreza, con el aumento de la producción y la productividad de los diferentes sectores económicos.

---

<sup>97</sup> Datos consultados en la página web del DANE, correspondientes al censo nacional de 2005 con sus respectivas proyecciones.

Expediente No. 25000-23-27-000-2001-0479-01  
Acumulados Nos. 2000-0428, 2001-0122, 2001-0343  
Actor: GUSTAVO MOYA ÁNGEL Y OTROS  
Acción Popular

La competitividad de la ciudad puede medirse de acuerdo a la calidad de sus aguas, al grado de saneamiento y, por supuesto, a la clase y naturaleza de los servicios ambientales, llámese espacios de entretenimiento, recreativos y/o educativos; Se trata de un componente fundamental para la sociedad como elemento diferenciador e identificador de parámetros de competitividad, el cual se encuentra ligado al concepto mismo de ciudad sostenible<sup>98</sup>.

En este contexto y como resultado del crecimiento poblacional y económico de la región, el río Bogotá se ha convertido en el principal receptor de aguas domésticas e industriales de la región, razón por la cual es uno de los afluentes más contaminados del continente. No resulta exagerado señalar que la cuenca se encuentra en emergencia social, ambiental y ecológica.

Desde la primera mitad del siglo anterior el problema de la contaminación de las aguas del río ha estado presente. Los diferentes vertimientos producto de las actividades industriales, agropecuarias y residenciales, y en las que se aportan cargas contaminantes de importancia no ha tenido respuesta inmediata y eficiente.

Los parámetros físico - químicos dan cuenta de la contaminación y el real deterioro de la calidad del

---

<sup>98</sup> Concepto que se refiere a la idea de conciliar desarrollo y sostenibilidad; cuando se habla de ciudad sostenible o sustentable se hace mención a la calidad de vida de los habitantes, a su mejoramiento, a la reducción y/o limitación de la actividad humana frente a los impactos en el ambiente, a la capacidad institucional, administrativa y fiscal de las ciudades en aras de mantener el crecimiento económico, etc.

Expediente No. 25000-23-27-000-2001-0479-01  
Acumulados Nos. 2000-0428, 2001-0122, 2001-0343  
Actor: GUSTAVO MOYA ÁNGEL Y OTROS  
Acción Popular

recurso; la turbiedad, los sólidos suspendidos, los metales pesados y el alto contenido de materia orgánica, los cuales generan desoxigenación y olores ofensivos son una muestra de ello.

En Bogotá se consume agua potable y se vierte contaminada, no existe programa ni política articulada en ejecución sobre reúso, tampoco se vislumbra un cambio de mentalidad del ciudadano de a pie, al contrario se profundiza la indiferencia social, comportamientos inadmisibles en términos de desarrollo.

Han transcurrido más de 100 años desde que se inició el proceso de discusión y análisis sobre las alternativas y estrategias para enfrentar el proceso de contaminación del río Bogotá, y a la fecha no se han visto resultados definitivos encaminados a presentar una solución con un enfoque sistémico, la situación, se reitera, sigue siendo catastrófica en términos ambientales.

No existe certeza sobre ¿qué es lo que queremos?, ¿queremos crecimiento económico?, ¿queremos mejorar la calidad de vida de los habitantes? La respuesta a estos interrogantes debe buscarse en el marco del concepto de ciudad sostenible el manejo de los recursos naturales.

Se requiere de manera urgente la adopción de medidas reales y de trascendencia, a través de las cuales se defina en el corto, mediano y largo plazo la implementación de planes, programas y proyectos que garanticen el mejoramiento ambiental de la cuenca hidrográfica. Se trata de verdaderas estrategias para el

Expediente No. 25000-23-27-000-2001-0479-01  
Acumulados Nos. 2000-0428, 2001-0122, 2001-0343  
Actor: GUSTAVO MOYA ÁNGEL Y OTROS  
Acción Popular

saneamiento de la cuenca, enmarcadas en instrumentos normativos que permitan su permanencia en el tiempo.

Así las cosas, se requiere conocer la descripción de la cuenca hidrográfica, su importancia y su problemática, tener claridad sobre la trascendencia de conservar y proteger los ciclos hidrológicos, los ecosistemas y la biodiversidad, comprender la cantidad y calidad del agua residual generada y la capacidad de asimilación del cuerpo receptor de la carga contaminante, entre otros.

En ese marco y partiendo de las estrategias diseñadas e implementadas, los programas y proyectos formulados fruto de los compromisos suscritos, las obligaciones establecidas por la normatividad vigente, esta Corporación definirá una estrategia en materia de mejoramiento ambiental en términos de responsabilidad, cronograma de ejecución, resultados y seguimiento.

## **I.2. - DESCRIPCIÓN E IMPORTANCIA DE LA CUENCA HIDROGRÁFICA DEL RÍO BOGOTÁ**

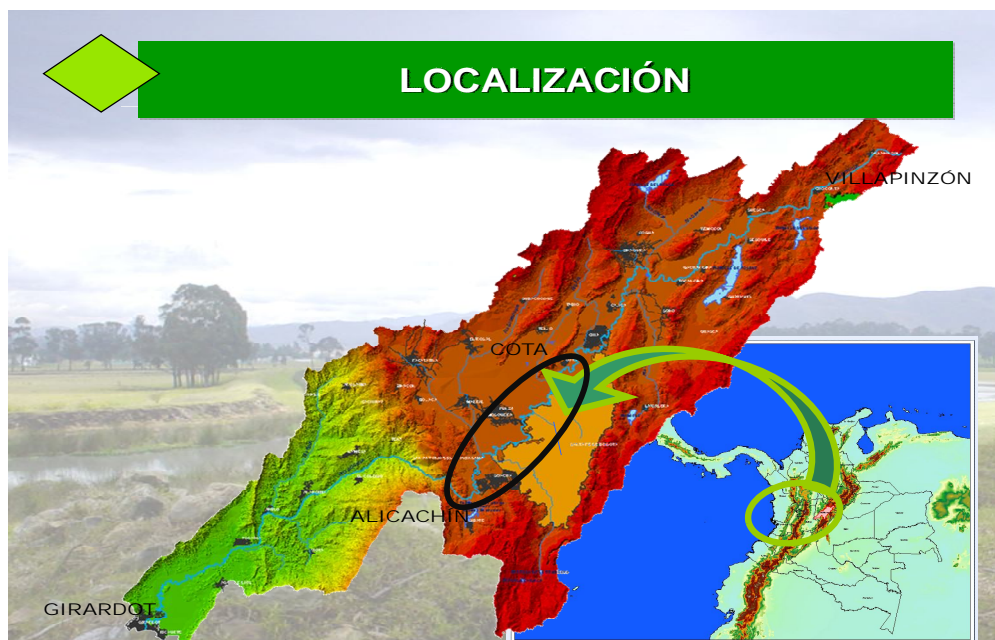

Fuente: CAR - POMCA

Expediente No. 25000-23-27-000-2001-0479-01  
Acumulados Nos. 2000-0428, 2001-0122, 2001-0343  
Actor: GUSTAVO MOYA ÁNGEL Y OTROS  
Acción Popular

El río Bogotá nace a unos 3400 msnm en el alto de la Calavera, Municipio de Villapinzón, al nororiente de Cundinamarca, con una extensión aproximada de **370Kms de longitud**, desembocando en el río Magdalena a una altura de 280 msnm, en el Municipio de Girardot.

Su recorrido se encuentra dividido en tres subcuencas:

- Alta: 170 km, desde el Municipio de Villapinzón hasta la estación hidroeléctrica Puente la Virgen.
- Media: 90 km, desde la estación hidroeléctrica Puente la Virgen hasta las compuertas de Alicachín.
- Baja: 120 km, desde las puertas de Alicachín - Embalse del Muña - hasta la desembocadura del río Bogotá en el río Magdalena.

A su vez, la cuenca del río se encuentra conformada por subcuencas del tercer orden de la siguiente manera<sup>99</sup>:

| NO. | SUBCUENCA                            | AREA<br>HA | %    |
|-----|--------------------------------------|------------|------|
| 1   | Río Bogotá (Sector Tibitoc - Soacha) | 71284      | 12.1 |
| 2   | Río Balsillas                        | 62442      | 10.6 |
| 3   | Río Bajo Bogotá                      | 54431      | 9.2  |
| 4   | Río Apulo                            | 48505      | 8.2  |
| 5   | Río Neusa                            | 44735      | 7.6  |
| 6   | Río Tunjuelito                       | 41535      | 7.0  |
| 7   | Embalse Tominé                       | 37428      | 6.4  |

<sup>99</sup> Fuente: Documento Pomca CAR 2006.

Expediente No. 25000-23-27-000-2001-0479-01  
Acumulados Nos. 2000-0428, 2001-0122, 2001-0343  
Actor: GUSTAVO MOYA ÁNGEL Y OTROS  
Acción Popular

|    |                                       |        |       |
|----|---------------------------------------|--------|-------|
| 8  | Río Teusaca                           | 35818  | 6.1   |
| 9  | Río Medio Bogotá (Sector Salto-Apulo) | 31650  | 5.4   |
| 10 | Río Alto Bogotá                       | 27615  | 4.7   |
| 11 | Río Calandaima                        | 26840  | 4.6   |
| 12 | Río Bogotá (Sector Sisga - Tibitoc)   | 25397  | 4.3   |
| 13 | Río Frío                              | 20160  | 3.4   |
| 14 | Embalse Sisga                         | 15526  | 2.6   |
| 15 | Río Chicú                             | 14189  | 2.4   |
| 16 | Embalse de Muña                       | 13422  | 2.3   |
| 17 | Río Bogotá (Sector Soacha-Salto)      | 10725  | 1.8   |
| 18 | Río Soacha                            | 4052   | 0.7   |
| 19 | Río Negro                             | 3390   | 0.6   |
|    | TOTALES                               | 589143 | 100.0 |

En cuanto a la formación Municipal son 46 los municipios que directa o indirectamente tienen relación con la cuenca hidrográfica a saber<sup>100</sup>:

| MUNICIPIO    | AREA MUN<br>ha | AREA EN<br>CUENCA ha | % MUNIC<br>EN<br>CUENCA |
|--------------|----------------|----------------------|-------------------------|
| AGUA DE DIOS | 8567           | 7033                 | 82                      |
| ANAPOIMA     | 12377          | 12359                | 100                     |
| ANOLAIMA     | 12045          | 11010                | 91                      |
| BOGOTA D.C.  | 163617         | 84531                | 52                      |
| BOJACA       | 10061          | 10061                | 100                     |
| CACHIPAY     | 5388           | 5388                 | 100                     |
| CAJICA       | 5157           | 5157                 | 100                     |
| CHIA         | 7928           | 7928                 | 100                     |

<sup>100</sup> Fuente: Documento Pomca CAR 2006.

Expediente No. 25000-23-27-000-2001-0479-01  
Acumulados Nos. 2000-0428, 2001-0122, 2001-0343  
Actor: GUSTAVO MOYA ÁNGEL Y OTROS  
Acción Popular

|                            |       |       |     |
|----------------------------|-------|-------|-----|
| CHOCONTA                   | 30178 | 25383 | 84  |
| COGUA                      | 13289 | 13278 | 100 |
| COTA                       | 6041  | 6041  | 100 |
| CUCUNUBA                   | 11163 | 1280  | 11  |
| EL COLEGIO                 | 11767 | 11753 | 100 |
| EL ROSAL                   | 9791  | 8492  | 87  |
| FACATATIVA                 | 15405 | 15164 | 98  |
| FUNZA                      | 6731  | 6731  | 100 |
| GACHANCIPA                 | 4165  | 4165  | 100 |
| GIRARDOT                   | 12979 | 7691  | 59  |
| GRANADA                    | 6739  | 1689  | 25  |
| GUASCA                     | 36457 | 21144 | 58  |
| GUATAVITA                  | 24561 | 15028 | 61  |
| LA CALERA                  | 33239 | 19223 | 58  |
| LA MESA                    | 14338 | 14295 | 100 |
| MADRID                     | 11829 | 11829 | 100 |
| MOSQUERA                   | 10822 | 10822 | 100 |
| NEMOCON                    | 9906  | 9906  | 100 |
| OSPINA PEREZ               | 11876 | 11875 | 100 |
| QUIPILE                    | 12619 | 3130  | 25  |
| RICAUORTE                  | 12810 | 8491  | 66  |
| SAN ANTONIO DEL TEQUENDAMA | 8845  | 8837  | 100 |
| SESQUILE                   | 14125 | 14093 | 100 |
| SIBATE                     | 12269 | 9313  | 76  |
| SOACHA                     | 18148 | 16950 | 93  |
| SOPO                       | 11045 | 11045 | 100 |
| SUBACHOQUE                 | 19473 | 17374 | 89  |
| SUESCA                     | 17282 | 12217 | 71  |
| TABIO                      | 7583  | 7583  | 100 |
| TAUSA                      | 19281 | 14219 | 74  |
| TENA                       | 5114  | 5114  | 100 |

Expediente No. 25000-23-27-000-2001-0479-01  
Acumulados Nos. 2000-0428, 2001-0122, 2001-0343  
Actor: GUSTAVO MOYA ÁNGEL Y OTROS  
Acción Popular

|                              |        |        |     |
|------------------------------|--------|--------|-----|
| TENJO                        | 11200  | 11200  | 100 |
| TOCAIMA                      | 24722  | 24243  | 98  |
| TOCANCIPA                    | 7321   | 7321   | 100 |
| VILLAPINZON                  | 22596  | 12772  | 57  |
| VIOTA                        | 20339  | 20130  | 99  |
| ZIPACON                      | 5872   | 5872   | 100 |
| ZIPAQUIRA                    | 19513  | 18438  | 94  |
| Totales (ha)de 46 municipios | 776573 | 587597 |     |

Sus principales tributarios son los ríos San Francisco, Sisga, Siecha, Tibitoc, Teusacá, Chicú, Juan Amarillo, Fucha, Tunjuelo, Balsillas, Soacha y Muña en la cuenca alta y Calandaima y Apulo en su cuenca baja. Constituye el eje central del sistema hídrico del Distrito Capital y articulador entre el área urbana y rural de la Sabana.

Como características generales, el Plan de Manejo y Ordenación de la Cuenca - POMCA - señaló que "el 30% de la cuenca presenta un relieve fuertemente ondulado a fuertemente quebrado, con pendientes entre 12 y 25% en el primero y en el segundo con pendientes entre 25 y 50%, condiciones que se presentan a lo largo de la cuenca con excepción de la denominada Sabana y en la parte baja de la cuenca, en donde predominan las pendientes entre 0 y 7% y los relieves: plano, ligeramente plano, ligeramente inclinado y ligeramente ondulado".

En cuanto a la climatología de la cuenca se plasmó que la misma registra una,

Expediente No. 25000-23-27-000-2001-0479-01  
Acumulados Nos. 2000-0428, 2001-0122, 2001-0343  
Actor: GUSTAVO MOYA ÁNGEL Y OTROS  
Acción Popular

"precipitación entre 400 y 2200 milímetros anuales, destacándose la subcuenca con menor nivel de lluvias la del río Soacha y parte de las subcuencas del río Bogotá sector Tibitoc - Soacha y río Balsillas", además que "la mayor precipitación se registra en los extremos orientales de las subcuencas Embalse Tominé y Río Teusacá."

La temperatura oscila entre 6 y 30 grados centígrados, registrando en el mayor porcentaje de la cuenca una temperatura entre 9 y 15°C.

En cuanto a las aguas subterráneas, "el Río Bogotá posee un sistema hidrogeológico, compuesto por tres grupos:

- a. Sedimentos y rocas con flujo esencialmente intergranular.
- b. Rocas con flujo esencialmente a través de fracturas.
- c. Sedimentos y rocas con limitados recursos de aguas subterráneas.

"En la subcuenca predominan los sistemas hidrogeológicos de sedimentos y rocas con limitados recursos de agua subterránea con presencia de acuitardos y acuíferos con capacidad inferior a 0.01 l/s/m, esto es, de muy baja productividad".

En el tema geológico y geomorfológico se encuentran dos zonas:

- a. Las subcuencas del altiplano y sus bordes, ubicadas arriba de los cerros de Boquerón, considerados como el "gran dique", en el pasado del lago del altiplano. Con dominio de rocas areniscas y arcillosas de formaciones cretácicas.
- b. La cuenca media y baja del río Bogotá, en donde el río abandona el altiplano hasta su desembocadura en el río Magdalena, caracterizada

Expediente No. 25000-23-27-000-2001-0479-01  
Acumulados Nos. 2000-0428, 2001-0122, 2001-0343  
Actor: GUSTAVO MOYA ÁNGEL Y OTROS  
Acción Popular

*por la sucesión de bloques separados por fallas inversas de orientación norte a noroeste, es decir, un relieve escalonado con escarpes y una litología en la que abundan rocas areniscas en la parte superior y debajo y hacia abajo rocas de baja resistencia como son las lodolitas del grupo Villeta.*

*c. En el sector occidental del altiplano y la desembocadura del río Bogotá al río Magdalena se identifican varias formas y formaciones superficiales relacionadas con cambios climáticos del pasado y otros influidos por cambios estructurales, destacándose alteritas y superficies de aplanamiento, formación de cañones, cerros testigo y escarpes así como depósitos de vertiente.*

Las unidades sin uso forestal o agropecuario, corresponden a las coberturas de cuerpos de agua, embalses y áreas sin vegetación.

En cuanto a las actividades industriales destaca la importancia de los invernaderos ubicados en el área de sabana y cuyo destino es el cultivo de flores y/o frutales.

Las actividades desarrolladas en la cuenca aportan \$7.142.792.000 al producto interno bruto nacional.

En la subcuenca predominan los siguientes usos:

- **FORESTAL:** Coberturas boscosas y de vegetación de tipo leñosa establecida. Su uso principal es el de protección del suelo en áreas de fuertes pendientes, provisión de leña para cocción, provisión de madera con fines de construcción o reparación de viviendas y hábitat para la escasa fauna, comprende las coberturas de bosque de galería, bosque secundario, plantaciones y rastrojo altos y bajos, este tipo de suelo se

Expediente No. 25000-23-27-000-2001-0479-01  
Acumulados Nos. 2000-0428, 2001-0122, 2001-0343  
Actor: GUSTAVO MOYA ÁNGEL Y OTROS  
Acción Popular

localiza por lo general sobre la unidad geomorfológica de llanura aluvial de los cauces de agua y laderas de montaña baja (sistema colinado) con pendientes que superan los 7°.

- **AGRÍCOLA:** Unidad de uso del suelo destinada a caña panelera, café, cultivos varios, frutales, plátano y rastrojo, por lo general para su posterior venta y comercialización, quedando un pequeño remanente para el consumo familiar. Este tipo de terreno se localiza sobre los terrenos poco inclinados y coinciden con las mejores unidades edafológicas y geomorfológicas como valles aluviales, cuevas y laderas poco inclinadas en terrenos de buenas propiedades físico químicas.
- **PECUARIO:** Unidad de uso del suelo destinada al pastoreo y levante de ganado lechero. Involucra las coberturas vegetales de pastos manejados, pastos naturales, y la consociación de pastos y rastrojos. Se localiza en sitios de poca pendiente, cercanos a vías de acceso en los vallecitos formados por los interfluvios de grandes y pequeñas corrientes de agua, y en las llanuras aluviales de los principales ríos. El pisoteo constante de los animales contribuye en los procesos erosivos por sobrepastoreo que forma parte del paisaje del área y potencia los procesos de remoción del suelo e inestabilidad del mismo, incluso señala la CAR se observó esta situación en las márgenes de quebradas y arroyos.

Las coberturas vegetales se presentan en las subcuencas de la parte media y baja de la cuenca del río Bogotá y la cobertura boscosa predominante es la correspondiente a rastrojo (alto y bajo).

De acuerdo con el POMCA se encuentra un mayor número de especies animales en las subcuencas del sector bajo con respecto a la parte alta de la cuenca; además que es

Expediente No. 25000-23-27-000-2001-0479-01  
Acumulados Nos. 2000-0428, 2001-0122, 2001-0343  
Actor: GUSTAVO MOYA ÁNGEL Y OTROS  
Acción Popular

igualmente notorio el mayor número de especies vulnerables existentes en la subcuenca de la parte baja. Ahora bien, en materia socioeconómica y como se precisó líneas atrás, la cuenca misma según el POMCA cuenta con una población total de 1.297.752 habitantes, de los cuales el 75% corresponde a población urbana y el 25% restante a población rural, sin perder de vista los habitantes de la ciudad de Bogotá que aportan el porcentaje mayor de las cargas contaminantes del río. Las subcuencas de los ríos Apulo, Calandaima, medio Bogotá Sector Salto de Tequendama - Apulo, Teusacá, Neusa, Bogotá sector Sisga - Tibitoc, Embalses de Tominé y Sisga, se caracterizan por el predominio de la población rural respecto a la urbana.

Las subcuencas del río Balsillas, Bogotá Sector Tibitoc - Soacha y río bajo Bogotá - Apulo - Girardot, son las que mayor número de habitantes aportan al total de la población de la cuenca.

En cuanto a la densidad poblacional las subcuencas río negro y río Soacha que a su vez son las de menor tamaño, presentan el mayor número de habitantes por unidad de superficie, con 2305 y 2500 habitantes por kilómetro cuadrado, respectivamente. En contraste el embalse del Sisga y el Embalse de Tominé presentan las menores densidades poblacionales con 36 y 44 habitantes por kilómetro cuadrado.

En suma, el río Bogotá constituye la principal fuente abastecedora de sistemas de acueducto, de riego agrícola, pecuario e industrial, así como la materia prima para la

Expediente No. 25000-23-27-000-2001-0479-01  
Acumulados Nos. 2000-0428, 2001-0122, 2001-0343  
Actor: GUSTAVO MOYA ÁNGEL Y OTROS  
Acción Popular

generación de energía eléctrica. Además, su ubicación geográfica y la riqueza ecosistémica de la cuenca, hacen innegable su importancia para el desarrollo no solo de la ciudad de Bogotá, sino de la región en general.

#### **I.4.3.2. PROBLEMÁTICA AMBIENTAL DE LA CUENCA HIDROGRÁFICA DEL RÍO BOGOTÁ**

Para conocer la situación ambiental del río Bogotá, estima la Sala pertinente remitirse al Plan de Ordenación y Manejo de la Cuenca Hidrográfica del río Bogotá - POMCA en donde se dejó plasmado de manera clara el diagnóstico de cada una de las subcuencas en las cuales está dividido el Río Bogotá:

##### **1. SUBCUENCA ALTO BOGOTÁ**

###### **Aspectos Físicos:**

- Se presentan movimientos en masa causados por la solifluxión profunda y lenta, degradación de tierras y desertificación.
- La explotación antitécnica de las canteras existentes es un factor de riesgo por deslizamientos locales, registra cierto riesgo de inestabilidad si se presenta desarrollo urbano o por la extracción de materiales.
- La cuenca tiene altas pendientes, poco desarrollo tecnológico agropecuario, Falta manejo ambiental de curtiembres y zonas de cultivo de papa.
- La industria de curtiembres afecta la calidad del agua del río, falta implementación de tecnologías limpias en curtiembres y zonas de cultivos de papa, en los municipios de Villapinzón y Chocontá la producción de residuos tóxicos de las curtiembres, diseminados en los potreros como abono contienen altas cargas de sulfuro de sodio y de cromo.

Expediente No. 25000-23-27-000-2001-0479-01  
 Acumulados Nos. 2000-0428, 2001-0122, 2001-0343  
 Actor: GUSTAVO MOYA ÁNGEL Y OTROS  
 Acción Popular

#### **Ecosistemas:**

##### **Nacimiento río Bogotá, vereda Chasques**

**Zona de nacimientos de agua (pozo La Nutria, laguna El Valle, pozo El Oso).**

- Se observa deforestación antigua (>50 años) en el nacimiento y una regeneración natural lenta, razón por la cual debe protegerse. Erosión eólica en la parte occidental laguna El Valle.

##### **Cuchilla El Choque (veredas Chingacio, Retiro de Los Blancos, Retiro de Indios).**

- Fincas ganaderas.
- Parches de pinos, cipreses y eucaliptos en zona colinada
- Incremento frontera agropecuaria en detrimento de área de reserva.

#### **Aspectos ambientales**

- Agotamiento fuentes hídricas por uso agropecuario.
- Contaminación fuentes hídricas por deficiente tecnología en industria de procesamiento de cueros.
- Uso de agroquímicos indiscriminado especialmente en cultivo de la papa

## **2. SUBCUENCA RÍO APULO**

#### **Aspectos Físicos:**

- Las rocas son muy susceptibles a erosionarse y alterarse y por lo tanto con un comportamiento geotécnico muy pobre para la cimentación de obras civiles.
- La susceptibilidad a los Fenómenos de Remoción en Masa en la cuenca es moderada a alta.
- Existe el riesgo de inestabilidad si se presenta desarrollo urbano o por la extracción de materiales sin tener en cuenta

Expediente No. 25000-23-27-000-2001-0479-01  
 Acumulados Nos. 2000-0428, 2001-0122, 2001-0343  
 Actor: GUSTAVO MOYA ÁNGEL Y OTROS  
 Acción Popular

la inclinación y composición de los estratos.

- La explotación antitécnica de las pocas canteras existentes es un factor de impacto.
- Los suelos presentan bastante pedregosidad en superficie y dentro del perfil
- Altas pendientes, topografía muy quebrada, con bajas posibilidades de mecanización.

#### **Saneamiento Básico:**

- Falta presupuestos municipales para la construcción de obras de saneamiento ambiental.
- Las áreas rurales presentan baja cobertura de servicios de agua potable, alcantarillado, tratamiento de aguas residuales y manejo de residuos sólidos.
- Falta la construcción de las PTAR de Anolaima, Zipacón, Apulo, Anapoima y Quipile.
- Falta implementación de tecnologías limpias en industrias, generándose impactos ambientales de magnitud media
- No existe un adecuado manejo de recolección de desechos sólidos en los cascos urbanos
- Inadecuado manejo de vertimientos de la industria avícola y porcina
- Falta potabilización de los sistemas de acueductos urbanos y rurales
- Inadecuada infraestructura de los alcantarillados urbanos y rurales
- Inadecuado manejo ambiental de mataderos de la subcuenca
- Falta tratamiento de aguas residuales de las zonas rurales

#### **Ecosistemas:**

##### **Río Apulo Municipio Zipacón Vereda Laguna Verde**

- Colmatación de cuerpo de agua por materia orgánica y sedimentación.
- Pérdida del espejo de agua por invasión de macrófitas,
- Falta atención por las autoridades competentes.
- Depósitos de desechos dentro de la laguna.

Expediente No. 25000-23-27-000-2001-0479-01  
 Acumulados Nos. 2000-0428, 2001-0122, 2001-0343  
 Actor: GUSTAVO MOYA ÁNGEL Y OTROS  
 Acción Popular

- Viviendas construidas muy cerca de la laguna depósito de desechos líquidos y sólidos dentro de la laguna.
- Falta atención por las entidades. La laguna necesita control y manejo.
- No hay compromiso por parte de las entidades de manejo control y limpieza de laguna.

**Río Apulo Municipio Anolaima Vereda Santa Bárbara sector Mesón Bochica**

- Algunas zonas presentan pérdida del bosque ripario<sup>101</sup>, depósitos de desechos sólidos y líquidos de los balnearios y viviendas, invasión de la ronda del río, parte alta del río contaminada por agroquímicos.
- Pérdida del caudal del río.
- Abastecimiento de aguas para vivienda,
- Contaminación del agua por basuras y polución proveniente de las carreteras.
- Falta sentido de pertenencia.

**Río Apulo Municipio Cachipay, Vereda Inspección de Peña Negra**

**Río Bahamón - Nacimiento Tablanca**

- Recurso hídrico surte acueductos del casco urbano de Cachipay y Zipacón.
- Contaminación por residuos sólidos y líquido, ronda del río mal protegida, contaminación por residuos sólidos y líquidos en un pequeño porcentaje
- Planta de tratamiento de desechos líquidos del 70% del casco urbano, manejo de desechos sólidos.
- Falta sentido de pertenencia de los vecinos hacia el río Bahamón.
- Disminución del caudal del río.

**Río Apulo Opio Apulo Barrio Gaitán Desembocadura del río Apulo en el Bogotá.**

- Baja calidad del agua

---

<sup>101</sup> Son aquellos asociados a las márgenes de los ríos y presentan características fisiológicas que los hacen resistentes a los períodos de inundación.

Expediente No. 25000-23-27-000-2001-0479-01  
 Acumulados Nos. 2000-0428, 2001-0122, 2001-0343  
 Actor: GUSTAVO MOYA ÁNGEL Y OTROS  
 Acción Popular

- Contaminación por olores, provenientes del río Bogotá
- Pérdida y deterioro del bosque ripario, contaminación por basuras
- Extracción de piedra del río por contratos para venta.

**Río Apulo Municipio Zipacón, Vereda Puerto Rico  
 Laguna Puerto Rico - Laguna San Venancio**

- Pérdida de agua, desecamiento en época de verano en la laguna de Puerto Rico
- Pérdida de la ronda de las lagunas, pastoreo cerca a las lagunas, desplazamiento de fauna por cultivo de flora foránea y por pérdida de la cobertura vegetal, dada por potrerización para pastoreo y cultivos.
- Los cultivos invaden las rondas de las lagunas.

**3. SUBCUENCA DEL RÍO BAJO BOGOTÁ (APULO - GIRARDOT)**

**Aspectos Físicos**

- Obturación de cauces de la red primaria de drenaje.
- Concentración de sedimentos, productos químicos, materia orgánica y malos olores en el cauce del río Bogotá. Debido a actividades agropecuarias e industriales, urbanización, se ha generado conversión de la valoración paisajística a espacios repulsivos, segregación social y expulsión de actividades turísticas y recreativas (Apulo, Tocaima y Girardot).
- Degradación de tierras y desertificación
- Las rocas son predominantemente impermeables, muy susceptibles a erosionarse y alterarse y por lo tanto con un comportamiento geotécnico muy pobre para la cimentación de obras civiles.
- La susceptibilidad a los Fenómenos de Remoción en Masa en la cuenca es moderada a alta
- Altas pendientes

Expediente No. 25000-23-27-000-2001-0479-01  
 Acumulados Nos. 2000-0428, 2001-0122, 2001-0343  
 Actor: GUSTAVO MOYA ÁNGEL Y OTROS  
 Acción Popular

- Suelos pedregosos, superficiales y susceptibles a la erosión
- Climas muy secos

#### **Aspectos ambientales**

- Incendios forestales
- Falta riego
- Alta colonización mixta urbano-rural (multiestratificada)
- Falta un manejo adecuado del agua, baja administración del recurso hídrico
- Algunas industrias no cumplen con los requerimientos ambientales.
- Falta distritos de riego

#### **Saneamiento Ambiental**

- Falta presupuestos municipales para la construcción de obras de saneamiento ambiental
- Las áreas rurales presentan baja cobertura de servicios de agua potable, alcantarillado, tratamiento de aguas residuales y manejo de residuos sólidos.
- Falta la construcción de la PTAR de Girardot
- Las industrias afectan la calidad del agua del río Bogotá
- Falta implementación de tecnologías limpias en industrias y zonas de cultivo, generándose impactos ambientales de magnitud alta
- Falta una regulación para el uso y manejo adecuado del agua en la cuenca

#### **Ecosistemas**

##### **Río bajo Bogotá (Apulo - Girardot) Cerro Guacana, municipio de Tocaima**

- Escasez de agua durante todo el año
- No hay aprovechamiento del agua de los pozos profundos.
- Pérdida de la cosecha de los cultivos por la escasez de agua durante el verano.
- Nadie se expresa ante la solicitud de los campesinos para la adecuación de un acueducto veredal.

Expediente No. 25000-23-27-000-2001-0479-01  
 Acumulados Nos. 2000-0428, 2001-0122, 2001-0343  
 Actor: GUSTAVO MOYA ÁNGEL Y OTROS  
 Acción Popular

- Parte del cerro presenta bosque secundario y potrerización.

**Río bajo Bogotá (Apulo - Girardot)**  
**Parque ecológico los chorros, Vereda. Los fundadores municipio de Agua de Dios**

- Pérdida de cobertura vegetal
- Contaminación de la quebrada por vertimiento de aguas residuales proveniente de los balnearios.
- Inadecuadas prácticas de siembra y reforestación.

**Río bajo Bogotá (Apulo - Girardot)**  
**Río Bogotá, Vereda. Manuel sur, municipio de Ricaurte**

- Contaminación del suelo por los sedimentos dejados por el río Bogotá cuando inunda la zona.
- Contaminación del aire.
- Caza de babilla y de caimán.
- Busca de petróleo en la zona.
- Hay destrucción del bosque ripario.

**Río bajo Bogotá (Apulo - Girardot)**  
**Desembocadura del río Bogotá en el Magdalena, municipio de Ricaurte, barrio isla del sol**

- Zona de contaminación tanto de las aguas como del aire, auditiva y visual.
- Construcciones sobre la ronda del río.
- Los pescadores de la zona sufren por la contaminación.
- Pérdida total y parcial del bosque ripario.
- Falta mecanismos ambientales y apropiación de la problemática por parte de las entidades reguladoras de los municipios de Girardot y Ricaurte.

**Río bajo Bogotá (Apulo - Girardot)**  
**Humedal el Yulo, municipio de Ricaurte**

- Contaminación en sus aguas por desechos sólidos y líquidos,
- Contaminación con agroquímicos provenientes de los cultivos de algodón.

Expediente No. 25000-23-27-000-2001-0479-01  
 Acumulados Nos. 2000-0428, 2001-0122, 2001-0343  
 Actor: GUSTAVO MOYA ÁNGEL Y OTROS  
 Acción Popular

- Potrerización
- Busca de petróleo en la zona.
- Hay destrucción del ambiente lacustre para potrerización.
- Falta gestión por las entidades competentes

#### **Aspectos Socioeconómicos**

- Alta población flotante sin sentido de pertenencia
- Sector industrial en debilitamiento
- Cambio de uso de las tierras y consiguiente pérdida de su vocación agropecuaria
- Falta cobertura y calidad en el servicio de agua potable
- Bajo desarrollo tecnológico en el sector agropecuario
- Baja en los cultivos transitorios
- Altos índices de enfermedades de transmisión sexual
- Provisión interrumpida de agua
- Deficiencia de proyección urbanística

#### **4. SUBCUENCA RÍO BALSILLAS**

##### **Aspectos Físicos:**

- Sedimentación y relleno de humedales, generando riesgo de inundación por desborde y encharcamiento.
- Movimientos en masa causados por solifluxión profunda y lenta generando deslizamientos rotacionales (parte media).
- Degradación de tierras y desertificación, generando truncamiento y carcavamiento (sector Bojacá - Mondoñedo).
- Tendencia al aumento del régimen torrencial por disminución en la infiltración (Quebrada Manzilla, Río Andes-Botello).
- La explotación antitécnica de las canteras existentes es un factor de impacto ambiental sensible en la cuenca.
- Falta riegos y agua para satisfacer las necesidades de los usuarios
- Tiene grandes áreas erosionadas y pobre reforestación

Expediente No. 25000-23-27-000-2001-0479-01  
 Acumulados Nos. 2000-0428, 2001-0122, 2001-0343  
 Actor: GUSTAVO MOYA ÁNGEL Y OTROS  
 Acción Popular

- Posee crecimiento desordenado en las cabeceras municipales
- Intensidad en invernaderos sin control ambiental
- Excesivo de uso de aguas subterráneas
- Falta cultivos planificados

#### **Saneamiento Básico:**

- Falta presupuestos municipales para la construcción de obras de saneamiento ambiental
- Las áreas rurales presentan baja cobertura de servicios de alcantarillado y tratamiento de aguas residuales
- Las industrias de flores afectan la calidad del agua del río Balsillas
- Falta implementación de tecnologías limpias en industrias y zonas de cultivos generándose impactos ambientales de magnitud media
- Existe sobreexplotación de las aguas subterráneas en esta subcuenca
- Presencia de áreas erosionadas que aportan sedimentos a los cuerpos de agua
- Existen vertimientos en zonas industriales y cultivos de flores
- En la zona rural existen vertimientos de aguas residuales domésticas

#### **Ecossistemas**

##### **Río Balsillas**

##### **Cerro Bor o Mancilla.**

- Potrerización para ganadería y cultivos, intervenido por carreteras destapadas, actividad humana, inadecuado uso del suelo y monocultivos.
- Red vial eléctrica y canteras, restricción por ingreso a la parte más alta del cerro por ubicación de las antenas.

Expediente No. 25000-23-27-000-2001-0479-01  
 Acumulados Nos. 2000-0428, 2001-0122, 2001-0343  
 Actor: GUSTAVO MOYA ÁNGEL Y OTROS  
 Acción Popular

**Balsillas - Subachoque - vereda Guamal  
 Cerro la Soldadezca**

- Posible caza no controlada de las especies que allí habitan, como conejos pava trucha capitán entre otros,
- Monocultivos.
- Pérdida de la cobertura vegetal por potrerización para monocultivos y ganadería aunque en pequeña proporción.
- Cultivos por encima de los 3000 msnm. Cultivo para el sostenimiento como papa, maíz, zanahoria, habas y arveja.
- Se caracterizan por ser todos monocultivos.

**Río Balsillas Vereda el Tobal Municipio  
 Subachoque  
 Cerro (Mojan, Carrasposo y Loma alta)**

- Bosques foráneos de eucaliptos, pérdida de bosque por Potrerización para ganadería.
- Cultivos en la parte baja del cerro.
- Invasión del rondal de las quebradas
- Tala de Bosque pérdida por ganadería, potreros hasta la punta del cerro.
- Cultivos de eucalipto y pasto.

**Río Bogotá  
 Distrito de riego la Ramada.**

- Pérdida del espejo de agua por macrófitas.
- Contaminación por basuras y aguas negras del río Bogotá,
- Contaminación del nivel freático por lavado de los agroquímicos de los cultivos que rodean.
- Relleno del humedal para urbanización.
- Bordes de eucalipto y pino.
- Relleno a la laguna con escombros para urbanización, matadero de caballos cerca de las acequias.

**Río Balsillas  
 Embalse pantano de arce.**

- Monocultivos.
- No se puede pescar en la zona,
- Ganadería.

Expediente No. 25000-23-27-000-2001-0479-01  
 Acumulados Nos. 2000-0428, 2001-0122, 2001-0343  
 Actor: GUSTAVO MOYA ÁNGEL Y OTROS  
 Acción Popular

- Cultivos de papa muy cerca al embalse.

**Río Balsillas Municipio Mosquera sector el pencial  
 Laguna la Herrera**

- Pérdida del espejo de agua por macrófitas en un 95%. Especies invasoras, kikuyo, acacia eucalipto.
- Potrerización para construcción y cultivo
- Presión de las canteras que se encuentran alrededor por aportes de sedimentos, basuras, árboles de eucalipto sembrados en la ronda de la laguna

**Río Balsillas Vereda Cortés Municipio Bojacá  
 Laguna el Juncal**

- Mezcla de aguas por canales que llegan a él de aguas negras provenientes de la planta de tratamiento de Madrid.
- Pérdida del cuerpo de agua por rellenos de los predios del rondal.

**Balsillas - Salitre  
 Laguna el salitre**

- Escasez de agua en verano, control de tala y mal uso del suelo, potrerización de algunos terrenos para ganadería
- La presión de origen Antrópico, por monocultivo de papa y presencia de bosques de eucalipto por el rondal de la trocha.

**Río Balsillas  
 Nacimiento del río Subachoque**

- Erosión por cultivos.
- Pérdida del bosque ripario del río Subachoque.
- Especies invasoras pino sembrado en el rondal del río que ha disminuido la vegetación propia y el cauce del mismo.
- Potrerización para ganadería y cultivos, intervenido por carreteras destapadas, actividad humana
- Inadecuado uso del suelo y monocultivos.
- Contrariedades entre la CAR y la gente que vive en el sector porque quieren reemplazar los bosques foráneos y la CAR no suministra

Expediente No. 25000-23-27-000-2001-0479-01  
 Acumulados Nos. 2000-0428, 2001-0122, 2001-0343  
 Actor: GUSTAVO MOYA ÁNGEL Y OTROS  
 Acción Popular

ni los permisos ni la capacitación para hacerlo adecuadamente (según vecinos del nacedero).

- Cultivos de papa, zanahoria y arveja.

**Río Balsillas Opio Facatativá  
 Piedras del Tunjo**

- Pérdida de pictogramas por inadecuado manejo
- Bosques foráneos
- Mezcla de agua de los nacederos con aguas negras del municipio, basuras e invasión de los predios.
- Árboles de pino y acacia.
- Potrerización para recepción y turismo.

**Río Balsillas  
 Cerro o cuchilla del tablazo, Reserva natural.**

- Potrerización para pastoreo, tala y pérdida de la cobertura vegetal.
- Potrerización en verano
- Monocultivos de papa.
- Se encuentra intervenido, existen bosques foráneos de eucaliptos.

**Balsillas - Vereda- Canica Alta**

- Escasez de agua en verano
- Control de tala y mal uso del suelo, potrerización de algunos terrenos para ganadería
- La presión de origen Antrópico, por monocultivo de papa y presencia de bosques de eucalipto por el rondal de la trocha.

**Aspectos Socio económicos**

- Erosión en zona de Mondoñedo
- Falta riegos y agua para satisfacer las necesidades de los usuarios
- Falta control y de aplicación de los planes de manejo ambiental de zonas de canteras que contaminan la laguna de la Herrera y el río balsillas
- Excesivo uso de aguas subterráneas, existe excavación de pozos para aguas subterráneas

Expediente No. 25000-23-27-000-2001-0479-01  
 Acumulados Nos. 2000-0428, 2001-0122, 2001-0343  
 Actor: GUSTAVO MOYA ÁNGEL Y OTROS  
 Acción Popular

que genera huecos profundos, los cuales repercuten en la estabilidad de los terrenos de la subcuenca.

- Los municipios que tienen un mayor desarrollo cuentan con crecimiento desordenado en las cabeceras municipales, generando diversas y complejas problemáticas sociales.
- Crecimiento y extensión ilimitada de las empresas de flores que generan contaminación de suelos, problemas a nivel de suministro de aguas, problemática social en la contratación de mano de obra.
- Falta cobertura y construcción de plantas de tratamientos de aguas residuales
- Presencia de asentamientos humanos en la ronda del río Bogotá en el municipio de Mosquera
- Expansión urbana desordenada.

## 5. SUBCUENCA RÍO CALANDAIMA.

### Aspectos Físicos:

- Las rocas son impermeables, susceptibles a erosionarse y alterarse y por lo tanto con un comportamiento geotécnico muy pobre para la cimentación de obras civiles.
- La susceptibilidad a los fenómenos de remoción en masa en la cuenca es moderada a alta.
- Altas pendientes, promedio >25
- Suelos con alta pedregosidad en superficie
- Falta tecnología en praderas y ganadería
- Ganadería en suelos de aptitud agroforestal
- Riesgos de deslizamientos por las altas pendientes

### Saneamiento Ambiental:

- Falta presupuestos municipales para la construcción de obras de saneamiento ambiental
- Las áreas rurales presentan baja cobertura de servicios de agua potable, alcantarillado, tratamiento de aguas residuales y manejo de residuos sólidos.

Expediente No. 25000-23-27-000-2001-0479-01  
 Acumulados Nos. 2000-0428, 2001-0122, 2001-0343  
 Actor: GUSTAVO MOYA ÁNGEL Y OTROS  
 Acción Popular

- Falta la construcción de la PTAR de Viota
- Las industrias afectan la calidad del agua del río Calandaima
- Falta implementación de tecnologías limpias en industrias
- Falta potabilización de los sistemas de acueductos urbanos y rurales
- Inadecuada infraestructura de los alcantarillados urbanos y rurales
- Inadecuado manejo ambiental de mataderos de esta subcuenca
- Falta tratamiento de aguas residuales de las zonas rurales

#### **Ecosistemas**

##### **Río Calandaima**

**Laguna del indio, municipio de Viotá, Vda. Alto palmar**

- Pastoreo cerca de los nacederos de agua y la laguna.
- Falta sentido de pertenencia de la población
- No hay un respeto de las cercas.

##### **Río Calandaima**

**Río lindo, Municipio. De Viotá, Vda. Capotes,**

- Contaminación del río por aguas residuales de balnearios y fincas aledañas.
- Basuras.
- Pérdida del bosque ripario.
- Construcciones en la ronda del río.
- Vertimiento de las aguas negras directamente al río.
- Compra de predios cercanos a la rivera del río.

##### **Río Calandaima**

**Desembocadura del río Calandaima en el Bogotá,**

- Río Bogotá cuando llega el Calandaima los peces se mueren.
- Plagas de zancudos y jején.

Expediente No. 25000-23-27-000-2001-0479-01  
 Acumulados Nos. 2000-0428, 2001-0122, 2001-0343  
 Actor: GUSTAVO MOYA ÁNGEL Y OTROS  
 Acción Popular

- *Malos olores generados por la contaminación del río Bogotá*
- *Vertimiento de las aguas negras directamente al río.*
- *Contaminación de las aguas por el Bogotá.*

#### **Aspectos Socio económicos**

- *Deficiente infraestructura en educación*
- *Deserción escolar en época de cosecha*
- *Deficiencia en el tratamiento el agua potable*
- *Inadecuado manejo de los residuos sólidos*
- *Falta sensibilidad de la población a los problemas medioambientales causados por la contaminación de las fuentes hídricas y el empleo de agua no tratada para consumo*
- *Inadecuado manejo del matadero municipal*
- *Falta tecnología en praderas y ganadería*
- *Falta control sobre las urbanizaciones irregulares*
- *Deforestación de zonas de rondas*
- *Población con bajos niveles educativos*

#### **6. SUBCUENCA DEL RÍO BOGOTÁ, SECTOR TIBITOC - SOACHA**

##### **Aspectos Físicos:**

- *Movimientos en masa causados por solifluxión profunda y lenta generando deslizamientos rotacionales (Río San Cristóbal).*
- *Desprendimientos y derrumbes rocosos.*
- *Disminución de la infiltración por impermeabilización en áreas urbanas.*
- *La explotación antitécnica de las canteras existentes es un factor de impacto sensible en la cuenca.*
- *Existe el riesgo de inestabilidad si se presenta desarrollo urbano o por la extracción de materiales sin tener en cuenta la inclinación de los estratos*
- *Depósitos coluviales sobre los cuales se presentan los grandes desarrollos urbanos.*

Expediente No. 25000-23-27-000-2001-0479-01  
 Acumulados Nos. 2000-0428, 2001-0122, 2001-0343  
 Actor: GUSTAVO MOYA ÁNGEL Y OTROS  
 Acción Popular

- Existen zonas inestables donde hay deslizamientos lentos, debido a procesos de deforestación y urbanización y en canteras donde se explotan limolitas.
- La amenaza sísmica en la cuenca es intermedia, lo cual incide en su estabilidad geotécnica regional.

#### **Aspectos Socio económicos**

- Cuenca con mayores índices de vertimientos sólidos, líquidos y gaseosos.
- Tiene bajo potencial hídrico
- Su cauce principal está altamente contaminad.
- Suelos bastante costosos
- Incorporación progresiva de suelos agrícolas a suelos de expansión urbana e industrial
- Altos niveles de aplicación de agroquímicos
- Falta control en la expansión urbana

#### **Ecosistemas**

- Falta presupuestos municipales para la construcción de obras de saneamiento ambiental
- Las áreas rurales presentan mediana cobertura de servicios de agua potable, alcantarillado, tratamiento de aguas residuales y manejo de residuos sólidos.
- Las industrias afectan la calidad del agua del río Bogotá
- Falta implementación de tecnologías limpias en industrias y cultivos, generándose impactos ambientales de magnitud alta
- Presencia alta de contaminación en su cauce principal
- Presencia de altos niveles de aplicación de agroquímicos en todo el área

#### **Predio Boquerón - Río San Francisco Área de Reserva Forestal Protectora**

- Incendios en época de verano
  - Degradación del suelo por bosques de especies foráneas como eucalipto acacias y coníferas
- Bosque de especies foráneas

#### **Alta De Bogotá - Ingreso Al Humedal La Conejera Quebrada La Salitrosa**

Expediente No. 25000-23-27-000-2001-0479-01  
 Acumulados Nos. 2000-0428, 2001-0122, 2001-0343  
 Actor: GUSTAVO MOYA ÁNGEL Y OTROS  
 Acción Popular

- Depósito de basuras y escombros dentro de la quebrada por parte de los vecinos
- Pérdida de la vegetación por invasión de pasto kikuyo.

**Municipio Mosquera - Bogotá Veredas San Francisco y el Diamante Distrito de Riego la Ramada.**

- Pérdida del espejo de agua por macrófitas.
- Contaminación por basuras y aguas negras del río Bogotá,
- Contaminación del nivel freático por lavado de los agroquímicos de los cultivos que rodean.
- Relleno del humedal para urbanización.
- Bordes de eucalipto y pino.
- Relleno a la laguna con escombros para urbanización, matadero de caballos cerca de las acequias.

**Aspectos Socio económicos:**

- Cambio de vocación agropecuaria por oferente de servicios de vivienda suntuaria.(Chía, Cajicá)
- Presión sobre territorio por cambio de uso
- Mayor índice de vertimientos sólidos, líquidos y gaseosos de la cuenca.
- Cauce río Bogotá altamente contaminado
- Implantación de condominios en forma de gheto cerrado que no genera valor agregado cultural al entorno donde se asienta, con una clara acción extractivista sobre el territorio con gran impacto negativo del paisaje en cerros orientales y parte plana (Yerbabuena, Sindamanoy, aposentos, río grande)
- Alta migración de población flotante atraída por industria, agroindustrias y comercio de bienes y servicios.
- Focos de hacinamiento, inseguridad y bajo nivel de calidad de vida (Mosquera, Funza)
- No hay proyectos de ampliación de acueductos y alcantarillados en territorios donde se autorizan proyectos urbanísticos (Chía, Cajicá)
- Alto riesgo de pérdida de cultura local y costumbres autóctonas por tendencia de cambio de uso y asentamiento de nuevas actividades.

Expediente No. 25000-23-27-000-2001-0479-01  
 Acumulados Nos. 2000-0428, 2001-0122, 2001-0343  
 Actor: GUSTAVO MOYA ÁNGEL Y OTROS  
 Acción Popular

- Autorización de cambio de uso del suelo y áreas de expansión en los Pots, sin considerar el gran crecimiento generado en el corto plazo
- No hay coherencia e integración entre criterios y parámetros del Pot. Con respecto a planes de desarrollo en municipios de subcuenca.
- No existe coherencia e integración de criterios y parámetros entre Pots y planes de desarrollo entre municipios relacionados por subcuenca
- No hay visión de subcuenca por parte de gestores municipales y regionales.
- No existen organizaciones de la sociedad civil que trabajen con criterio de subcuenca.
- No hay interés y motivación en gestionar proyectos que se desarrollen por subcuenca.

## **7. SUBCUENCA RÍO CHICÚ**

### **Aspectos Físicos:**

- Sedimentación y relleno de humedales del altiplano con integración a las formas de ocupación agropecuarias y/o urbanas, generando riesgo de inundación por desborde y encharcamiento
- Falta riego
- El drenaje esta sesgado a un lado de la cuenca
- Colonización descontrolada en zonas de ladera, principalmente en áreas del municipio de Tenjo
- Alto costo de la tierra
- Tenencia de la tierra (áreas muy pequeñas)

### **Ecosistemas**

#### **Río Chicú Municipio Tenjo Vereda Joaica Santuario Cerro Joaica**

- Urbanizaciones de predios vecinos, tala.
- Inseguridad social,
- Los habitantes del cerro en épocas de verano explotan pozos profundos por tener recursos para hacerlo, campesinos de la vereda tiene acueductos veredales que les proporciona a los habitantes de la zona agua 1 hora tres días en la semana.
- Incendios en verano dado principalmente por la Falta control en el turismo.

Expediente No. 25000-23-27-000-2001-0479-01  
 Acumulados Nos. 2000-0428, 2001-0122, 2001-0343  
 Actor: GUSTAVO MOYA ÁNGEL Y OTROS  
 Acción Popular

- Hay inconformidad en la comunidad por tenencia de la tierra por grandes latifundistas que no los dejan ingresar al cerro.
- Hay sentido de pertenencia.
- Pastoreo
- Turismo, posiblemente caza. Extracción de material vegetal como laurel
- Contaminación por basuras

**Río Chicú Municipio Tenjo Vereda Camellón de los Pinos - Chise. Humedales**

- Potreización y expansión rural. No hay sentido de pertenencia,
- Contaminación por agroquímicos de cultivos cercanos Zona estable, no presenta desequilibrio hídrico, mantiene niveles aceptables de agua todo el año. Abastece riegos de cultivos.

**Río Chicú Municipio Tabio Vereda Lourdes Cerro Lourdes**

- Cultivos de flores en el piedemonte del cerro,
- Contaminación por minería (ladrilleras)
- Agroquímicos que viene de todos los cultivos,
- Potrerización para ganadería y cultivos de papa cebolla y zanahoria
- Poca agua en época de verano,
- Erosión en la parte de Tabio, Chía, Lourdes

**Saneamiento Ambiental:**

- Falta presupuestos municipales para la construcción de obras de saneamiento ambiental
- Las industrias de flores y la ganadería afectan la calidad del agua del río Chicú
- Falta implementación de tecnologías limpias en industrias, generándose impactos ambientales de magnitud media.
- En la zona rural existen vertimientos de aguas residuales domésticas
- El área rural de Tabio y Tenjo presenta baja cobertura de servicios de alcantarillado y tratamiento de aguas residuales
- La principal contaminación del recurso hídrico es por vertimientos orgánicos

Expediente No. 25000-23-27-000-2001-0479-01  
 Acumulados Nos. 2000-0428, 2001-0122, 2001-0343  
 Actor: GUSTAVO MOYA ÁNGEL Y OTROS  
 Acción Popular

#### **Aspectos Socio Económicos:**

- Deficiencia en el cubrimiento de servicios públicos, como alcantarillado y acueducto en las zonas de ladera en el cerro de Juica en el municipio de Tenjo.
- Problemática en el suministro, cuidado y manejo del recurso hídrico por parte de la comunidad.
- Falta y disminución del recurso hídrico en el municipio y se realizan perforaciones de pozos profundos
- Urbanización descontrolada en zona de ladera por parte de familias que llegan a trabajar en el cultivo de flores
- Alto costo de la tierra y la tendencia es la de fomentar los condominios exclusivos para los industriales del sector de la punta en Tenjo
- Fraccionamiento de las áreas de tenencia de la tierra
- Falta apoyo y proyección de la población una vez terminan el bachillerato
- Presencia de reforestación con especies foráneas.

#### **8. SUBCUENCA DEL EMBALSE DEL MUÑA**

##### **Aspectos Físicos:**

- Sedimentación y relleno de humedales del altiplano, generando riesgo de inundación por desborde y encharcamiento.
- Concentración de sedimentos, productos químicos, materia orgánica y malos olores en el cauce del río Bogotá. Debido a actividades agropecuarias e industriales, urbanización, se ha generado conversión de la valoración paisajística a espacios repulsivos, segregación social y expulsión de actividades turísticas y recreativas.
- Movimientos en masa causados por solifluxión profunda y lenta generando deslizamientos rotacionales (parte media).
- Degradación de tierras y desertificación (parte baja)
- Explotación de canteras sin técnicas de restauración
- Áreas perimetrales a la represa y el municipio con olores fétidos y nauseabundos
- Presencia intensa de vectores (moscas - zancudos)

Expediente No. 25000-23-27-000-2001-0479-01  
 Acumulados Nos. 2000-0428, 2001-0122, 2001-0343  
 Actor: GUSTAVO MOYA ÁNGEL Y OTROS  
 Acción Popular

- Utilización de aguas de riego sin tratamiento
- Expansión descontrolada y sin planificación del municipio
- Bastantes fábricas perimetrales al embalse con posibilidades contaminantes
- Bajos niveles de reforestación.

### **Ecosistemas**

#### **Embalse del Muña**

#### **Embalse del Muña, municipio de Sibaté**

- Vertimiento de las aguas del río Bogotá en embalse.
- Fumigación con agroquímicos para controlar la proliferación de zancudos y macrófitas.
- Nubes completas de zancudos y jején.
- Inseguridad.
- Hay problemas sanitarios por proliferación de hematófagos (zancudos y jején)
- Infecciones y malos olores.
- Los animales también sufren por los hematófagos.

### **Saneamiento Ambiental:**

- Falta de presupuestos municipales para la construcción de obras de saneamiento ambiental
- Las áreas rurales presentan muy baja cobertura de servicios de alcantarillado, tratamiento de aguas residuales y manejo de residuos sólidos.
- El municipio de Sibaté no posee PTAR para el tratamiento de las aguas residuales domésticas
- Las industrias afectan la calidad del agua del río Muña
- Falta implementación de tecnologías limpias en zona industrial, generándose impactos ambientales de magnitud media.
- Presencia de olores fuertes y fétidos en las áreas perimetrales a la represa del Muña y al municipio de Sibaté
- Presencia de bastantes fábricas en el perímetro del embalse, con posibilidades de contaminación

### **Aspectos Socio Económicos:**

- Áreas perimetrales a la represa y el municipio con olores fétidos y nauseabundos
- Presencia intensa de vectores (moscas - zancudos)

Expediente No. 25000-23-27-000-2001-0479-01  
 Acumulados Nos. 2000-0428, 2001-0122, 2001-0343  
 Actor: GUSTAVO MOYA ÁNGEL Y OTROS  
 Acción Popular

- Morbilidad infantil y de adultos provocada por vectores
- Expansión descontrolada y sin planificación del municipio
- Bastantes fábricas perimetrales al embalse con posibilidades contaminantes
- Minería no tecnificada
- Impacto paisajístico
- Uso de agroquímicos en áreas de cultivo ubicadas en Páramo
- No cultura de agricultura sostenible en procesos productivos agropecuarios.
- No coherencia e integración entre criterios y parámetros de los planes de ordenamiento territorial con respecto a planes de desarrollo en municipios de subcuenca.
- No coherencia e integración de criterios y parámetros entre pots y planes de desarrollo entre municipios relacionados por subcuenca
- No visión de subcuenca por parte de gestores municipales y regionales.
- No existencia de organizaciones de la sociedad civil que trabajen con criterio de subcuenca.
- No diseño, interés y motivación en gestionar proyectos que se desarrollen por subcuenca.

## **9. SUBCUENCA DEL EMBALSE DEL SISGA**

### **Aspectos Físicos:**

- Como principal efecto se identifica la integración del área de los cauces a las actividades productivas y a la propiedad privada.
- Movimientos en masa causados por solifluxión profunda y lenta generando deslizamientos rotacionales (parte baja).
- La amenaza sísmica en la cuenca es intermedia, lo cual incide en su estabilidad geotécnica regional.
- La erosión por ganadería en zonas de pendientes medias
- Letreros intimidatorios de no acceso a la cuenca, en vías públicas.
- Las pendientes medias y altas, en zonas circundantes a la cuenca

Expediente No. 25000-23-27-000-2001-0479-01  
 Acumulados Nos. 2000-0428, 2001-0122, 2001-0343  
 Actor: GUSTAVO MOYA ÁNGEL Y OTROS  
 Acción Popular

#### **Saneamiento Ambiental:**

- Existen zonas erosionadas en áreas de pendientes medias que aportan sedimentos a los cuerpos de agua de la cuenca
- Falta de presupuestos municipales para la construcción de obras de saneamiento ambiental
- Las áreas rurales presentan muy baja cobertura de servicios de agua potable, alcantarillado, tratamiento de aguas residuales y manejo de residuos sólidos.
- Las industrias de flores afectan la calidad del agua del río Bogotá
- Falta implementación de tecnologías limpias en cultivos agrícolas, generándose impactos ambientales de magnitud media.

#### **Ecosistemas**

##### **Sisga - veredas Tierranegra y El Hato**

- Deslizamientos.
- Siembra no controlada de árboles.
- Excesiva siembra de pino y eucalipto.
- Falta presencia institucional.
- Falta vigilancia

##### **Sisga - Cerro La Leonera (vereda boquerón y Tilatá)**

- Tala para leña
- Caza no controlada por parte de habitantes de Machetá
- Viviendas abandonadas
- Conflictos por uso del bosque con algunos habitantes de Machetá

##### **Sisga Guatavita Vereda Carbonera Alta Carbonera Alta**

- Actividad humana.
- Monocultivo de papa,
- Tala para uso de madera y potrerización por ganadería y cultivo,
- Cultivo de papa a mas de 3000msnm,
- Laboreo de la tierra tecnificado.
- Monocultivos que pueden causar erosión en la tierra.

Expediente No. 25000-23-27-000-2001-0479-01  
 Acumulados Nos. 2000-0428, 2001-0122, 2001-0343  
 Actor: GUSTAVO MOYA ÁNGEL Y OTROS  
 Acción Popular

- *Laboreo tecnificado de la tierra, puede causar compactación y pérdida de productividad del suelo.*

**Aspectos Socio Económicos:**

- *La erosión por ganadería en zonas de pendientes medias*
- *Sitio vulnerable para alteración del orden publico por la presencia del embalse del Sisga.*
- *Las pendientes en zonas circundantes a la cuenca*
- *Inadecuado manejo de cultivos en zona de ladera*
- *Uso indiscriminado e inadecuado de plaguicidas contamina los cuerpos de agua*
- *Falta de personal que asesora en la Umata*
- *Baja comercialización de productos artesanales*
- *Invasión de ronda de cauces de ríos por la actividad ganadera*

**10. SUBCUENCA DEL EMBALSE DE TOMINÉ**

**Aspectos Físicos:**

- *Sedimentación de lagunas*
- *Sedimentación y relleno de humedales del altiplano con integración a las formas de ocupación agropecuarias y/o urbanas, generando riesgo de inundación por desborde y encharcamiento.*
- *Degradación de tierras y desertificación, (parte media).*
- *Tendencia al aumento del régimen torrencial por disminución en la infiltración.*
- *Pendientes fuertes*
- *Microclimas localizados*
- *Cultivos en ladera por encima de los 3000msnm*
- *Erosión severa en sectores*
- *Falta tecnología en la producción*
- *Cuenca en su mayoría en zonas de ladera*
- *Cuenca deficitaria en agua por su distribución*

**Saneamiento Básico:**

- *Falta presupuestos municipales para la construcción de obras de saneamiento ambiental*
- *Las áreas rurales presentan baja cobertura de servicios de alcantarillado y tratamiento de aguas residuales y manejo de residuos sólidos*

Expediente No. 25000-23-27-000-2001-0479-01  
 Acumulados Nos. 2000-0428, 2001-0122, 2001-0343  
 Actor: GUSTAVO MOYA ÁNGEL Y OTROS  
 Acción Popular

- Falta implementación de tecnologías limpias en industrias, generándose impactos ambientales de magnitud media
- Existen muchas ladrilleras sin plan de manejo
- Presencia de erosión severa que origina sedimentos a los cuerpos de agua
- El casco urbano de Guasca no cuenta con PTAR, aunque este municipio está dentro de esta subcuenca, hace parte de la jurisdicción de CORPOGUAVIO

#### **Ecosistemas**

##### **Municipio de Sesquilé y Guatavita - Vereda: Morro en Sesquilé**

##### **Chaleche Sesquilé y Chaleche Guatavita Municipio Guatavita - Vereda: Chaleche**

- Colmatación por sedimentación
- Acumulación de materia orgánica en los fondos
- Tenencia de la Tierra por grandes fincas
- Basuras
- Erosión por viento
- Inundaciones a los cultivos en época de lluvias

##### **Municipio Guatavita - Vereda: Guandita**

- Presencia de mucho turista que deteriora y arroja residuos sólidos a la ronda del embalse de Tominé
- Invasión de ronda de ríos por la actividad ganadera
- Cultivos en ladera por encima de los 3000msnm
- Inadecuado manejo del recurso hídrico en la comunidad del casco urbano.
- Falta tecnología en la producción
- Cuenca en su mayoría en zonas de ladera y ampliación de la frontera agrícola

#### **11. SUBCUENCA RÍO FRÍO**

##### **Aspectos Físicos**

- Tendencia al aumento del régimen torrencial por disminución en la infiltración.
- El comportamiento geotécnico regular a pobre
- Altas pendientes

Expediente No. 25000-23-27-000-2001-0479-01  
Acumulados Nos. 2000-0428, 2001-0122, 2001-0343  
Actor: GUSTAVO MOYA ÁNGEL Y OTROS  
Acción Popular

- Cultivos por encima de los 3000msnm
- Explotaciones indebidas de ganadería y agricultura
- Erosión en pendientes altas mayores a 3000msnm usos en ganadería y cultivos.
- Desbordamiento del río en las zonas planas ocasionado desastres, en el sector de Chía.
- Ocupación de las márgenes del río en zona urbana de Chía

#### **Saneamiento Básico**

- Falta presupuestos municipales para la construcción de obras de saneamiento ambiental
- El área rural de Tabio presenta baja cobertura de servicios de alcantarillado y tratamiento de aguas residuales
- Falta implementación de tecnologías limpias en industrias y ganadería, generándose impactos ambientales de magnitud media.
- La principal contaminación del recurso hídrico es por vertimientos orgánicos

#### **Ecosistemas**

##### **Río Frío Vereda San Jorge Vereda San Jorge**

- Arborización con eucalipto, potrerización para ganadería, monocultivos, invasión de acacia, canalización inadecuada del río
- Potrerización para ganadería y monocultivos. arborización de especies exóticas, daño de la carretera por el cauce del río

##### **Río Frío Municipio Zipaquirá Reserva forestal Don Benito**

- Saqueo de paja para venta, caza de avifauna principalmente de águilas aunque se trata de controlar.
- Dificultad para la adquisición de predios adyacentes.
- Cultivo de flores, explotación de pozos profundos para regar floricultivos y pastos.

Expediente No. 25000-23-27-000-2001-0479-01  
 Acumulados Nos. 2000-0428, 2001-0122, 2001-0343  
 Actor: GUSTAVO MOYA ÁNGEL Y OTROS  
 Acción Popular

**Río Frío Municipio Cajicá Vereda Chuntame  
 Sector Quebrada de Campo**

- Inundaciones de veredas cercanas al río Bogotá y cultivos de flores.
- Cambio de uso de cultivo a vivienda.
- Extracción de agua de pozos profundos para surtir cultivos.
- Contaminación de quebradas y río por vertimiento de floricultivos y empresas avícolas.
- Bosques foráneos, Falta gestión por las entidades ambientales competentes y la alcaldía para la recuperación paisajística y reforestación con especies nativas
- Erosión por minerías y floricultivos.
- Falta control de los vertimientos industriales en los ríos
- Manejo al río Bogotá y frío para mitigar problemas de inundaciones.

**Río Frío Municipio Tabio Vereda Llano Grande,**

- Pérdida de cobertura vegetal por potrerización
- Bajo nivel del cauce de quebradas por uso de agua para riego de pastos
- Zonas de importancia ambiental bajo propiedades privadas, y sin ningún control para conservación.
- Captación de aguas y explotación de pozos profundos para riego de cultivo de flores y riego de pastos

**Aspectos Socio Económicos:**

- Cambio de vocación agropecuaria por oferente de servicios de vivienda suntuaria. (Chía, Cajicá)
- Presión sobre territorio por cambio de uso
- Contaminación fuentes hídricas por agroquímicos en cultivo de papa.
- Alteración y daño de vías por transporte de gravas de tábio a Bogotá principalmente
- Implantación de condominios en forma de gheto cerrado que no genera valor agregado cultural al entorno donde se asienta, con una clara acción extractivista sobre el territorio (chía,cajicá)
- Cambio del paisaje de rural a condominio o conjunto cerrado.

Expediente No. 25000-23-27-000-2001-0479-01  
 Acumulados Nos. 2000-0428, 2001-0122, 2001-0343  
 Actor: GUSTAVO MOYA ÁNGEL Y OTROS  
 Acción Popular

- Alta migración de población flotante atraída por agroindustrias y construcción acelerada de proyectos urbanísticos (Chía, Cajicá)
- No proyectos de ampliación de acueductos y alcantarillados en territorios donde se autorizan proyectos urbanísticos (Chía, Cajicá)
- Alto riesgo de Pérdida de cultura local y costumbres autóctonas por tendencia de cambio de uso y asentamiento de nuevas actividades.
- No cultura de agricultura sostenible en procesos productivos en actividades de horticultura.
- Autorización de cambio de uso del suelo y áreas de expansión en los pots, sin considerar el gran crecimiento generado en el corto plazo
- No coherencia e integración entre criterios y parámetros del pot con respecto a pd en municipios de subcuenca.

## 12. CUENCA MEDIA DEL RÍO BOGOTÁ, SECTOR EL SALTO DE TEQUENDAMA - APULO

### Aspectos Físicos:

- Concentración de sedimentos, productos químicos, materia orgánica y malos olores en el cauce del río Bogotá. Debido a actividades agropecuarias e industriales.
- Derrumbes y flujos hidrogravitacionales.
- La susceptibilidad a los Fenómenos de Remoción en Masa en la cuenca es moderada a alta.
- Suelos con pedregosidad en superficie
- Fuertes pendientes y escarpes
- Suelos superficiales en partes de la subcuenca
- Río Bogotá altamente contaminado, donde se expelen olores fétidos y nauseabundos
- Afloramientos rocosos
- Mucho microfallamiento
- Poco potencial ganadero, pero se está usando mucho

### Saneamiento básico:

- Falta presupuestos municipales para la construcción de obras de saneamiento ambiental

Expediente No. 25000-23-27-000-2001-0479-01  
 Acumulados Nos. 2000-0428, 2001-0122, 2001-0343  
 Actor: GUSTAVO MOYA ÁNGEL Y OTROS  
 Acción Popular

- Las áreas rurales presentan muy baja cobertura de servicios de agua potable, alcantarillado, tratamiento de aguas residuales y manejo de residuos sólidos.
- Los municipios no poseen PTAR para el tratamiento de las aguas residuales domésticas
- Las industrias afectan la calidad del agua del río Bogotá
- Falta implementación de tecnologías limpias en industrias, generándose impactos ambientales de magnitud media
- Presencia de una alta contaminación del río Bogotá, generándose olores fuertes y fétidos
- El municipio de Anapoima cuenta con PTAR para el tratamiento de aguas residuales domésticas

### **Ecosistemas**

#### **Río medio Bogotá sector salto - apulo Quebrada la tinta**

- Contaminación por aguas residuales.
- En las zonas de las hidroeléctricas los desplazados que llegan talan y venden la madera, cazan y destruyen todo, pero nadie dice nada, ni siquiera los de la hidroeléctrica cuyos predios son los afectados por las invasiones.
- Falta una jornada de recuperación de las rondas de los arroyos, quebradas y ríos, no se respeta la zona de ronda.
- Hay conciencia en el cuidado de la flora, pero ya fue talado casi todo

#### **Río medio Bogotá sector salto - apulo Quebrada campos, bocatoma acueducto 14 veredas.**

- Suspender la tala de todo tipo de especies vegetales.
- Restringir y prohibir la caza.
- Detener el avance del aprovechamiento del suelo para la producción agropecuaria y el establecimiento de viviendas.
- Recuperación y mantenimiento de la ronda de los ríos y quebradas.
- La vegetación riparia es muy reducida, los predios de las viviendas llegan casi al cauce de

Expediente No. 25000-23-27-000-2001-0479-01  
 Acumulados Nos. 2000-0428, 2001-0122, 2001-0343  
 Actor: GUSTAVO MOYA ÁNGEL Y OTROS  
 Acción Popular

los arroyos, quebradas y ríos, no se respeta la norma de los treinta metros a lado y lado.

- Se recomienda la compra de predios para su protección.

**Río medio Bogotá sector salto - apulo**  
**UMATA, Anapoima**

- Construcción de viviendas
- Escasez de agua.
- Problemas con el servicio de agua
- Cultivos de árboles frutales

**Río medio Bogotá sector salto - apulo**  
**Reserva forestal peñas blancas, Municipio del**  
**Colegio.**

- Ganadería y cultivos en los alrededores de la reserva.

**Río medio Bogotá sector salto - apulo**  
**Cerró Manjuy, Laguna de colores,**

- Suspender la tala de todo tipo de especies vegetales.
- Restringir y prohibir la caza.
- Controlar la actividad ganadera y el mal uso del agua.
- La construcción de la carretera se convirtió en un factor importante para la desaparición y posterior desplazamiento de la fauna, en especial la de mamíferos.
- La laguna de colores prácticamente ha desaparecido por razones antrópicas los habitantes aseguran que gran parte de la culpa la tienen los túneles de la hidroeléctrica.

**Río medio Bogotá sector salto - apulo**  
**Laguna de Pedro palo, vereda Catalamonte**

- Turismo inadecuado.
- Falta control en el ingreso y alrededores.
- Pesca ilícita por pescadores que acuden a la laguna.
- Contaminación por residuos sólidos en los alrededores.

Expediente No. 25000-23-27-000-2001-0479-01  
 Acumulados Nos. 2000-0428, 2001-0122, 2001-0343  
 Actor: GUSTAVO MOYA ÁNGEL Y OTROS  
 Acción Popular

**Río medio Bogotá sector salto - Apulo**  
**Vereda el Rosario, laguna de Pacuala, Municipio**  
**de Tena.**

- Cultivos de cítricos, café y guayaba
- Tienen controlada la tala debido a que de la zona se surten de agua para su consumo.
- No hay protección de las rondas de quebradas y arroyos.
- Es importante retirar de los alrededores de la laguna los cultivos de café debido al riesgo que existe de contaminación del agua para consumo humano

**Aspectos Socio Económicos:**

- Pocas y malas vías de comunicación que dificulta y la comercialización de los productos agrícola.
- Deficiente potabilidad y calidad de aguas en los municipios
- Falta centro de acopio o zona de comercialización de los productos que le generen garantías al agricultor.
- Zona de fallas geológicas que dificultan el diseño e implantación de eficiente infraestructura en la subcuenca.
- No coherencia e integración entre criterios y parámetros del pot con respecto a pd en municipios de subcuenca.
- La orientación de los colegios de secundaria no cuenta con la vocación agrícola o comercial, es el caso de tena que cuenta con un enfoque de educación clásica.

**13. CUENCA RÍO NEGRO**

**Aspectos físicos:**

- Obturación de cauces de la red primaria de drenaje por coluvionamiento, causado por el escurrimiento superficial en los interfluvios y Falta flujo de agua en los cauces.
- El impacto visual de las explotaciones a cielo abierto ejecutadas de forma antitécnica.
- Fuertes pendientes de las laderas
- Bajo potencial hídrico

Expediente No. 25000-23-27-000-2001-0479-01  
 Acumulados Nos. 2000-0428, 2001-0122, 2001-0343  
 Actor: GUSTAVO MOYA ÁNGEL Y OTROS  
 Acción Popular

- Mucha colonización desordenada, gran población rural
- Zonas de expansión urbana en sitios de ladera
- Impacto paisajístico de Zipaquirá es desfavorable
- Existen explotaciones de minerales (carbón, arcillas, arenas) que originan vertimientos con altas cargas de sedimentos
- Bajo potencial hídrico que restringe el uso del recurso

#### **Saneamiento Básico:**

- Colonización desordenada de población rural que genera vertimientos domésticos sin tratamiento
- Zonas de expansión urbana en sitios de ladera que origina zonas pobladas sin servicios de saneamiento básico
- Falta presupuestos municipales para la construcción de obras de saneamiento ambiental
- Las áreas rurales presentan muy baja cobertura de servicios de agua potable, alcantarillado, tratamiento de aguas residuales y manejo de residuos sólidos.
- Las industrias de la sal y pecuaria afectan la calidad del agua del río Negro
- Falta implementación de tecnologías limpias en las anteriores industrias, generándose impactos ambientales de magnitud media.

#### **Ecosistemas**

- Río Negro Municipio Zipaquirá Vereda San Antonio Sector Argelia
- Quebrada el Amolador
- Pérdida de la cobertura vegetal para urbanización, desplazamiento y pérdida de flora y fauna propias de la región.
- Construcción de viviendas y red vial de Cundinamarca.

#### **Aspectos Socio Económicos:**

- Crecimiento no planificado
- Presión sobre territorio por cambio de uso
- Contaminación fuentes hídricas por asentamientos humanos
- Inmigración creciente sin capacidad de acogida

Expediente No. 25000-23-27-000-2001-0479-01  
 Acumulados Nos. 2000-0428, 2001-0122, 2001-0343  
 Actor: GUSTAVO MOYA ÁNGEL Y OTROS  
 Acción Popular

- Sobre- dimensionamiento de oferta de territorio para implantación de vivienda de interés social
- Asentamientos humanos en áreas de alto riesgo
- No política, ni proyectos de reubicación en el corto plazo
- Alto riesgo de pérdida de cultura local y costumbres autóctonas por tendencia de cambio de uso y asentamiento de nuevas actividades.
- No cultura de agricultura sostenible en procesos productivos contaminantes de fuentes hídricas como cultivo de papa.
- No coherencia e integración entre criterios y parámetros del pot con respecto a pd en municipios de subcuenca.
- No diseño, interés y motivación en gestionar proyectos que se desarrollen por subcuenca.

#### 14. CUENCA RÍO NEUSA

##### Aspectos Físicos:

- Sedimentación de lagunas en modelados de origen glaciar y en formas estructurales, originado por el escurrimiento superficial en los interfluvios ligado a cultivos limpios y coluvionamiento.
- La Integración del área de los cauces a las actividades productivas y a la propiedad privada es el principal efecto.
- Degradación de tierras y desertificación, causado por aumento de la temperatura de suelos, endurecimiento y agrietamiento de horizontes argílicos, escurrimiento superficial y sub-superficial, generando truncamiento y carcavamiento (Río Checua).
- Tendencia al aumento del régimen torrencial por disminución en la infiltración en el río Checua.
- Existen sectores inestables en la cuenca por la explotación antitécnica de canteras y ladrilleras.
- Laderas con pendientes altas
- Altamente erosionada
- Agricultura y ganadería por encima de lo 3000msnm
- Alta contaminación por explotación de arcillas y arenas y otras fábricas como Peldar.
- Suelos erosionados

Expediente No. 25000-23-27-000-2001-0479-01  
 Acumulados Nos. 2000-0428, 2001-0122, 2001-0343  
 Actor: GUSTAVO MOYA ÁNGEL Y OTROS  
 Acción Popular

- Falta tecnología en la explotación agroindustrial
- Existe generación de sedimentos por zonas erosionadas

#### **Saneamiento Básico:**

- Existe contaminación de cuerpos de agua por la explotación de la industria extractiva
- Falta implementación de tecnologías limpias en industrias extractivas, generándose impactos ambientales de magnitud media.
- Falta presupuestos municipales para la construcción de obras de saneamiento ambiental.
- Las áreas rurales presentan mediana cobertura de servicios de alcantarillado, tratamiento de aguas residuales y manejo de residuos sólidos.

#### **Ecosistemas**

##### **Neusa Opio Nemocon Vereda Camadro Complejo cerros (Astorga Santuario y Morga)**

- Incendios forestales, en época seca,
- Inundaciones del río Checua y desbordamiento del río Neusa, Expansión agrícola para siembra de papa arveja y maíz,
- Cambio de uso del suelo del páramo de Mogua,
- Siembra de pino y eucalipto
- Plantación de maderables,
- Erosión Checua Cerro Verde, Mogua, Susacá.
- Chircales problema ambiental, residuos sólidos.

##### **Neusa Municipio de Cogua Vereda Neusa Embalse del Neusa**

- Incendios forestales, en época seca,
- Inundaciones del río Checua y desbordamiento del río Neusa, Expansión agrícola para siembra de papa arveja y maíz
- Cambio de uso del suelo del páramo de Mogua
- Siembra de pino y eucalipto
- Plantación de maderables
- Erosión Checua Cerro Verde, Mogua, Susacá.
- Chircales problema ambiental, residuos sólidos.
- Se requiere un relleno sanitario, pero la comunidad no quiere

Expediente No. 25000-23-27-000-2001-0479-01  
 Acumulados Nos. 2000-0428, 2001-0122, 2001-0343  
 Actor: GUSTAVO MOYA ÁNGEL Y OTROS  
 Acción Popular

**Neusa Municipio Tausa Vereda La Vidriada  
 Laguna verde**

- Los cultivos están invadiendo páramo, y el bosque secando las fuentes hídricas, desplazando la fauna.
- Problemática para adquisición de los predios aledaños al páramo para conservación, por Falta legalización de los títulos, están siendo utilizados para agricultura y ganadería deteriorando el páramo cultivos a 3600 msnm.
- Los Fraylejonales se encuentran destruidos.
- Falta control de la zona para ingreso de carros y personas, no hay control para turismo, no hay presencia de guardias, no hay delimitados senderos,
- Pisoteo continuó
- Cambio de uso del suelo del páramo por monocultivos,
- Control inadecuado de la zona, requiere protección y manejo de los predios a adquirir y concertaciones para llegar a acuerdos de compra con los actuales propietarios.

**Río Neusa Municipio de Tausa  
 Páramo de Guerrero**

- Fragmentación de hábitats para monocultivos que afectan la parte agroecológica,
- Incendios forestales en época seca,
- Falta control en la caza de borugo zorro y armadillo, principalmente en ladera grande.
- Erosión por monocultivos de trigo, papa y cebada en el suelo de Ladera grande y Rasgatabajo, daño al paisaje por turismo, basuras y Falta senderos para evitar pisoteo
- Problemática por contaminación proveniente de minería de carbón y ladrillo en la Vereda Pajarito, sedimentos en el Embalse plantas acuáticas
- Problemas por sequías en verano en la vereda Ladera grande.
- Cultivos por encima de los 3400 msnm colindante con la reserva
- Falta recursos para adquirir predios para proteger

Expediente No. 25000-23-27-000-2001-0479-01  
 Acumulados Nos. 2000-0428, 2001-0122, 2001-0343  
 Actor: GUSTAVO MOYA ÁNGEL Y OTROS  
 Acción Popular

**Neusa Municipio de Cogua cerro el Cardonal Vereda  
 Paramobasta.**

**Reserva Forestal Rodamontal - Casa de  
 guardaparque en la reserva**

- Problema de adquisición de los predios por Falta acuerdos con los propietarios.
- Contaminación por curtiembres en la vereda Rodamontal
- Minas de explotación de carbón
- Incendios forestales en época de verano.
- Falta regulación para uso del suelo, entidades ambientales como Umata no actúa por ser dominio CAR esa zona, traslape en la gestión institucional.
- Falta adquisición de predios por Falta legalización de los predios.
- Avalúos por debajo de las necesidades de los propietarios.

**Aspectos Socioeconómicos:**

- Deficiencia de infraestructura y oferta educativa
- Falta oferta de empleo
- Falta tecnificación en las actividades agrícolas y pecuarias
- Alta contaminación por explotación de arcillas y arenas y otras fábricas como Peldar.
- Falta tecnología en la explotación agroindustrial
- Contaminación de fuentes hídricas por actividad económica
- Problemas de salud ocasionados por los hornos de carbón y chircales

**15. CUENCA DEL RÍO BOGOTÁ - SECTOR SISGA -  
 TIBITÓC**

**Aspectos Físicos:**

- Como principal efecto se identifica la integración del área de los cauces a las actividades productivas y a la propiedad privada.

Expediente No. 25000-23-27-000-2001-0479-01  
 Acumulados Nos. 2000-0428, 2001-0122, 2001-0343  
 Actor: GUSTAVO MOYA ÁNGEL Y OTROS  
 Acción Popular

- Sedimentación y relleno de humedales del altiplano con integración a las formas de ocupación agropecuarias y/o urbanas. Generando riesgo de inundación por desborde y encharcamiento
- La amenaza sísmica en la cuenca es intermedia, lo cual incide en su estabilidad
- La explotación anti técnica de las canteras existentes es un factor de impacto ambiental sensible en la cuenca.
- Altas pendientes
- Presencia de climas secos y fríos semiáridos (localizados)
- Presencia de zonas muy erosionadas
- Falta tecnologías agropecuarias en ciertos sistemas productivos (papa- pastos)
- Falta manejo ambiental zonas principalmente industriales
- Alta concentración de población en la cuenca
- Canteras y materiales de arcilla explotados sin recuperación de canteras
- Inadecuada planificación industrial

#### **Saneamiento Básico:**

- Falta implementación de tecnologías limpias en zonas de cultivos agrícolas, generándose impactos ambientales debido a la desprotección de estas áreas
- Falta presupuestos municipales para la construcción e implementación de obras de saneamiento ambiental
- Las áreas rurales de Gachancipá, Suesca y Sesquilé presentan baja cobertura de servicios de agua potable, alcantarillado, tratamiento de aguas residuales y manejo de residuos sólidos
- Falta manejo ambiental de las industrias de productos químicos, abonos y fertilizantes, derivados lácteos, vidrio, cerámica, ladrillos, papel, envases y cosméticos
- Alta concentración de población en las zonas rurales de la cuenca, traducido en altos vertimientos orgánicos
- Existencia de canteras y materiales de arcilla explotados sin manejo ambiental adecuado
- Explotación de flores en los municipios de Tocancipá, Gachancipá y Suesca.

Expediente No. 25000-23-27-000-2001-0479-01  
 Acumulados Nos. 2000-0428, 2001-0122, 2001-0343  
 Actor: GUSTAVO MOYA ÁNGEL Y OTROS  
 Acción Popular

## **Ecosistemas**

### **Municipio de Suesca**

- Pastoreo excesivo
- Uso de agroquímicos para los cultivos de papa

### **Municipio de Sesquile - Vereda Boitiva**

- Cercanía al casco urbano, construcción de casas.
- Pérdida de la vegetación, tala de árboles
- Escasez de agua.
- Captación de agua de las quebradas El Cañón, Cañada las Espigas y Quebrada Lengutá.

### **Municipio de Gachancipá - Vereda El Roble**

- Tala por expansión al cultivo de papa
- Parcelación, construcción incontrolada por derecho a la vivienda
- Quebrada Quindingua: ecosistema compartido con Tocancipá.

### **Municipio de Tocancipá - Vereda:**

- Falta de sentido de pertenencia
- Deforestación por parte de la comunidad
- Falta de aceptación de la comunidad para realizar participación en proyectos de recuperación.

### **Municipio de Tocancipá Casco urbano**

- No es conveniente usar zonas de manejo de áreas servidas para recreación y deporte.
- Pastoreo,
- Presencia de domésticos y ratas que atacan la fauna del humedal
- A pesar de que las aguas que conforman al humedal se observa avifauna y vegetación palustre

## **Aspectos Socioeconómicos:**

- Cambio de vocación agropecuaria por oferente de servicios de vivienda y asentamiento de industrias
- Presión sobre territorio por cambio de uso

Expediente No. 25000-23-27-000-2001-0479-01  
 Acumulados Nos. 2000-0428, 2001-0122, 2001-0343  
 Actor: GUSTAVO MOYA ÁNGEL Y OTROS  
 Acción Popular

- Explotación de canteras sin la adecuada tecnología y sin licencias ambientales
- Invasión de rondas por actividades agropecuarias
- Inmigración de población proveniente de diferentes partes del país en busca de oportunidades de trabajo.
- Hacinamiento de población en ciertos sectores provocado por procesos de inmigración
- Impacto paisajístico por cambio de uso
- Contaminación creciente en corredor industrial.
- Uso de agroquímicos en áreas de cultivos principalmente de papa
- Alto riesgo de pérdida de cultura local y costumbres autóctonas por tendencia de cambio de uso y asentamiento de actividades industriales y agroindustriales.
- No cultura de agricultura sostenible en procesos productivos agropecuarios.
- No estudio y planificación en municipios acerca de la disponibilidad de servicios públicos e infraestructura social para recibir el aumento en la inmigración y su tendencia creciente.
- No coherencia e integración entre criterios y parámetros del pot con respecto a pd en municipios de subcuenca.

## 16. CUENCA RÍO SOACHA

### Aspectos Físicos:

- Como principal efecto se identifica la integración del área de los cauces a las actividades productivas y la propiedad privada.
- Sedimentación y relleno de humedales del altiplano con integración a las formas de ocupación agropecuarias y/o urbanas. Generando riesgo de inundación por desborde y encharcamiento.
- Desprendimientos y derrumbes rocosos.
- Degradación de tierras y desertificación,
- Tendencia al aumento del régimen torrencial por disminución en la infiltración (impermeabilización urbana).
- La susceptibilidad a los Fenómenos de Remoción en Masa en la cuenca es moderada a alta
- La explotación antitécnica de las canteras existentes es un factor de impacto ambiental

Expediente No. 25000-23-27-000-2001-0479-01  
 Acumulados Nos. 2000-0428, 2001-0122, 2001-0343  
 Actor: GUSTAVO MOYA ÁNGEL Y OTROS  
 Acción Popular

*sensible en la cuenca, igualmente es un factor de riesgo por deslizamientos locales.*

- *Microclima seco*
- *Cuenca con altas pendientes*

#### **Saneamiento Básico:**

- *Falta presupuestos municipales para la construcción de obras de saneamiento ambiental*
- *Las industrias afectan la calidad del agua del río Soacha*
- *Falta implementación de tecnologías limpias en industrias generándose impactos ambientales de magnitud alta*
- *Presencia de una alta contaminación del río Soacha, generándose olores fuertes.*

#### **Ecosistemas**

##### **Río Soacha**

##### **Vda. San Jorge, municipio de Soacha**

- *Contaminación con agroquímicos.*
- *Deforestación y caza no controlada.*
- *Canteras para extracción de arcilla para ladrilleras.*
- *Sobrepastoreo.*
- *Cultivos por encima de los tres mil metros.*
- *Destrucción total y parcial de la ronda del río.*

##### **Río Soacha**

##### **Vda. Fuzunga, municipio de Soacha,**

- *Canteras para la extracción de arcilla para la elaboración de ladrillos.*
- *Erosión generada por las canteras*
- *Contaminación atmosférica y auditiva.*
- *Disminución del caudal del río Soacha en un 50%*
- *Pérdida de la ronda del río.*
- *Sobrepastoreo.*
- *Cultivos de especies foráneas.*
- *Bosques de Eucaliptos*

#### **Aspectos Socioeconómicos:**

- *Cuenca con alta ocupación urbana y desordenada*
- *Bajo potencial agropecuario*

Expediente No. 25000-23-27-000-2001-0479-01  
 Acumulados Nos. 2000-0428, 2001-0122, 2001-0343  
 Actor: GUSTAVO MOYA ÁNGEL Y OTROS  
 Acción Popular

- Tecnología de producción agropecuaria sin restricciones
- Bastante contaminada con material particulado (aire), y las aguas del río
- Bastante basura en superficie
- Suelos muy superficiales y con pedregosidad en superficie
- Falta planificación rural
- Río muy contaminado con presencia de olores fétidos y nauseabundos
- Alta densidad poblacional
- Áreas urbanas informales
- Minería informal
- Heterogeneidad urbana
- Impacto paisajístico
- Invasión de rondas por asentamientos humanos
- Uso de agroquímicos en áreas de cultivo
- No cultura de agricultura sostenible en procesos productivos agropecuarios.
- No coherencia e integración entre criterios y parámetros del pot con respecto a pd en municipios de subcuenca.
- No coherencia e integración de criterios y parámetros entre pots y pds entre municipios relacionados por subcuenca

#### **17. CUENCA DEL RÍO BOGOTÁ - SECTOR SOACHA - SALTO DE TEQUENDAMA**

##### **Aspectos Físicos:**

- Concentración de sedimentos, productos químicos, materia orgánica y malos olores en el cauce del río Bogotá. Debido a actividades agropecuarias e industriales, urbanización, se ha generado conversión de la valoración paisajística a espacios repulsivos, segregación social y expulsión de actividades turísticas y recreativas.
- Degradación de tierras y desertificación, causado por aumento de la temperatura de suelos, endurecimiento y agrietamiento de horizontes argílicos, escurrimiento superficial y sub-superficial, generando truncamiento y carcavamiento.

Expediente No. 25000-23-27-000-2001-0479-01  
 Acumulados Nos. 2000-0428, 2001-0122, 2001-0343  
 Actor: GUSTAVO MOYA ÁNGEL Y OTROS  
 Acción Popular

- La susceptibilidad a los Fenómenos de Remoción en Masa en la cuenca es moderada a alta.
- La explotación antitécnica de las pocas canteras existentes es un factor de impacto ambiental en la cuenca.
- Existe el riesgo de inestabilidad si se presenta desarrollo urbano o por la extracción de materiales sin tener en cuenta la inclinación y composición de los estratos.
- La amenaza sísmica en la cuenca es intermedia, lo cual incide en su estabilidad geotécnica regional.
- Suelos superficiales y pedregosos
- Microclima semiárido
- Suelos muy erosionados
- Amplias vegas de inundación
- Zonas de ladera en la parte oriental
- Una muy alta carga social expansiva del municipio de Soacha.
- Río muy contaminado con presencia de olores fétidos y nauseabundos.

#### **Saneamiento Básico:**

- Falta presupuestos municipales para la construcción de obras de saneamiento ambiental
- Falta la construcción de la PTAR de Soacha
- Las industrias afectan la calidad del agua del río Bogotá
- Falta implementación de tecnologías limpias en industrias generándose impactos ambientales de magnitud alta
- Presencia de una alta contaminación del río Bogotá, generándose olores muy fuertes y fétidos

#### **Ecosistemas**

##### **Salto - Soacha**

##### **Humedal de Tierra blanca, municipio de Soacha,**

- Inseguridad.
- Basuras dentro y fuera del humedal
- Invasión generada en los alrededores.
- Contaminación por desechos sólidos y líquidos, además por polución.
- Contaminación auditiva
- No está completamente cercada.
- Hay pastoreo en las áreas que no está cercada.

Expediente No. 25000-23-27-000-2001-0479-01  
 Acumulados Nos. 2000-0428, 2001-0122, 2001-0343  
 Actor: GUSTAVO MOYA ÁNGEL Y OTROS  
 Acción Popular

- Hay grandes eucaliptos que ayudan a secar el humedal.
- El espejo de agua está completamente perdido

**Salto - Soacha**

**Humedal terreros, municipio de Soacha**

- Inseguridad.
- Malos olores generados por el río Bogotá.
- Basuras y desechos orgánicos (cadáveres)
- No hay señalización, ni medidas de protección.
- No hay manejo ni control en el humedal, con las basuras.

**Salto - Soacha**

**Humedal de Neuta, municipio de Soacha,**

- Contaminación.
- Proliferación de Macrófitas y ratas.
- Construcciones alrededor del humedal
- Proliferación de malos olores.
- Inseguridad.

**Aspectos Socio Económicos:**

- Río muy contaminado con presencia de olores fétidos y nauseabundos
- Alta densidad poblacional
- Áreas urbanas informales
- Minería informal
- Heterogeneidad urbana
- Centros poblados el charquito y san francisco con necesidades básicas insatisfechas y con carencia de ingresos (en municipio de Soacha)
- Invasión de rondas por actividades agropecuarias
- Uso de agroquímicos en áreas de cultivo
- No cultura de agricultura sostenible en procesos productivos agropecuarios.
- No coherencia e integración entre criterios y parámetros de planes de ordenamiento territorial con respecto a planes de desarrollo en municipios de la subcuenca.
- No coherencia e integración de criterios y parámetros entre planes de ordenamiento territorial y planes de desarrollo entre municipios relacionados por subcuenca

Expediente No. 25000-23-27-000-2001-0479-01  
 Acumulados Nos. 2000-0428, 2001-0122, 2001-0343  
 Actor: GUSTAVO MOYA ÁNGEL Y OTROS  
 Acción Popular

## 18. CUENCA RÍO TEUSACÁ

### Aspectos Físicos

- Obturación de cauces de la red primaria de drenaje por coluvionamiento, causado por el escurrimiento superficial en los interfluvios y Falta flujo de agua en los cauces.
- Como principal efecto se identifica la integración del área de los cauces a las actividades productivas y a la propiedad privada.
- Movimientos en masa causados por solifluxión profunda y lenta generando deslizamientos rotacionales.
- Desprendimientos y derrumbes rocosos (parte alta de la margen izquierda).
- La explotación anti técnica de las canteras existentes es un factor de impacto ambiental sensible en la cuenca.
- Algunas laderas desprotegidas
- Pendientes muy altas, presencia de escarpes
- Presencia de minifundios cerca de las cabeceras municipales
- Alto costo de la tierra
- Presencia de empresas sin control ambiental

### Saneamiento Básico

- Falta presupuestos municipales para la construcción de obras de saneamiento ambiental
- Las áreas rurales presentan baja cobertura de servicios de alcantarillado, tratamiento de aguas residuales y manejo de residuos sólidos.
- Las industrias de flores afectan la calidad del agua del río Teusacá
- Falta implementación de tecnologías limpias, generándose impactos ambientales de magnitud media

### Ecosistemas

#### Cerro Pionono

- Inseguridad en los alrededores, zona altamente intervenida, cultivos de flores, viviendas campestres en los cerros, pérdida del nivel freático y calidad del agua, manejo de

Expediente No. 25000-23-27-000-2001-0479-01  
 Acumulados Nos. 2000-0428, 2001-0122, 2001-0343  
 Actor: GUSTAVO MOYA ÁNGEL Y OTROS  
 Acción Popular

*agroquímicos, impacto visual, falta de gestión en la CAR, Terratenientes latifundistas.*

- *Solo se registra el problema de inseguridad.*
- *Se considera positiva la gestión de alínea con respecto al manejo ambiental y a la generación de empleo*

#### **Vereda Canavité**

- *Cultivos de flores, cercanía a la vía,*
- *Falta de sentido de pertenencia, potrerización.*
- *Gestión por parte del Municipio de Sopó.*
- *Falta de gestión y coordinación administrativa entre Tocancipá y Sopó.*

#### **El Fraylejonal**

- *Compra de predios para loteo de fincas.*
- *Falta de gestión por parte de autoridad ambiental.*
- *Falta voluntad de la gente hacia la protección de recursos*
- *La comunidad se queja de que las entidades no entregan información sobre los ecosistemas*
- *Venta de predios con fines de conservación Menos promesa y más cumplimiento por parte de la CAR y de la Umata*

#### **Embalse San Rafael**

- *Reforestación con Acacia, pinos y eucaliptos*
- *Construcción de fincas y casas de campo*

#### **Vereda el Hato**

- *Déficit de agua, incendios, captación de agua por parte de dueños de casas estrato 6 de la quebrada el Burro.*
- *Falta de ordenamiento del recurso agua.*
- *Incendios forestales*

#### **Aspectos Socio Económicos:**

- *Cambio de vocación agropecuaria por oferente de servicios de vivienda suntuaria y asentamiento de agroindustria y empresas de servicios*
- *Presión sobre territorio por cambio de uso*

Expediente No. 25000-23-27-000-2001-0479-01  
 Acumulados Nos. 2000-0428, 2001-0122, 2001-0343  
 Actor: GUSTAVO MOYA ÁNGEL Y OTROS  
 Acción Popular

- *Atracción de población flotante por oferta de empleo, en empresas de flores de exportación y otras industrias (Sopó)*
- *Invasión de rondas por actividades agropecuarias a todo lo largo del río Teusacá*
- *Gran cantidad de proyectos de condominios con cambio de vocación de uso e impacto paisajístico y cultural.*
- *Uso de agroquímicos en áreas de cultivos principalmente de papa*
- *Alto riesgo de pérdida de cultura local y costumbres autóctonas por tendencia de cambio de uso y asentamiento de actividades industriales, agroindustriales y de vivienda suntuaria*
- *No cultura de agricultura sostenible en procesos productivos agropecuarios.*
- *No estudio y planificación en municipios acerca de la disponibilidad de servicios públicos e infraestructura social para recibir el aumento en la inmigración y su tendencia creciente.*
- *No coherencia e integración entre criterios y parámetros del plan de ordenamiento territorial con respecto a planes de desarrollo en municipios de subcuenca.*
- *No coherencia e integración de criterios y parámetros entre planes de ordenamiento territorial y planes de desarrollo entre municipios relacionados por subcuenca".*

#### **I.4.3.3 CONTEXTUALIZACIÓN Y FUNDAMENTOS DE LAS ESTRATEGIAS Y LÍNEAS DE ACCIÓN PARA EL MEJORAMIENTO AMBIENTAL DE LA CUENCA HIDRORÁFICA DEL RÍO BOGOTÁ**

Resulta oportuno recordar que mucho antes de la creación de la Corporación Autónoma Regional - CAR - (1961), se elaboraron y estructuraron múltiples estrategias y líneas de acción encaminadas al saneamiento ambiental de la cuenca hidrográfica del río Bogotá.

Expediente No. 25000-23-27-000-2001-0479-01  
Acumulados Nos. 2000-0428, 2001-0122, 2001-0343  
Actor: GUSTAVO MOYA ÁNGEL Y OTROS  
Acción Popular

Hoy, 107 años después de la primera discusión<sup>102</sup>, la situación del río es preocupante y alarmante<sup>103</sup>. No se puede desconocer o minimizar las actuaciones de las autoridades ambientales (*Corporación Autónoma Regional de Cundinamarca - CAR -*, *Distrito Capital (a través del DAMA - hoy Secretaría Distrital de Ambiente y de la Empresa de Acueducto y Alcantarillado de Bogotá - E.A.A.B. - o Gobernación de Cundinamarca (a través de la Secretaría de Ambiente Departamental)* sin embargo los resultados en el componente ambiental apenas sobrepasan la calificación de regular e, incluso, otros ni siquiera la de mala.

Ciertamente, la protección de los páramos, subpáramos y nacimientos de agua son prueba de ello, verbigracia el páramo de Guacheneque, nacimiento del río Bogotá, se está viendo afectado por la plantación de especies foráneas como el pino, además de la falta de control en la siembra de papa en la zona.

Las microcuencas que nacen en los cerros orientales y que abastecen al río Bogotá, zona importante, por cuanto allí se presenta recargan de acuíferos y condensación de lluvias, están siendo olvidadas.

---

<sup>102</sup>Desde 1906 se inicia la discusión y análisis de los mecanismos e instrumentos necesarios para la protección del Río Bogotá y sus afluentes. Se contrató el estudio "Pearson" en el cual se recomendó el tratamiento de las aguas residuales en la fuente, esto es, antes de ser vertidas al río.

<sup>103</sup>La situación del río Bogotá fue descrita detalladamente en el acápite anterior.

Expediente No. 25000-23-27-000-2001-0479-01  
Acumulados Nos. 2000-0428, 2001-0122, 2001-0343  
Actor: GUSTAVO MOYA ÁNGEL Y OTROS  
Acción Popular

Las curtiembres de los Municipios de Villapinzón, Chocontá y San Benito siguen realizando descargas clandestinas afectando la calidad del recurso hídrico<sup>104</sup>.

La creciente actividad industrial de los municipios de la sabana introduce un alto porcentaje de contaminación el cual no ha sido controlado. Igual suerte corre la contaminación no puntual proveniente de las actividades agropecuarias.

Los vertimientos de las aguas residuales domésticas de los Municipios de la cuenca alta que no cuentan con sistemas de tratamiento alteran la calidad físico - química del río, como es el caso de Villapinzón, al igual que las descargas municipales de las plantas de aguas residuales existentes, tales como las de Chocontá y Sesquilé.

Desde la desembocadura del río Salitre o Juan Amarillo hasta el Salto de Tequendama el río está prácticamente muerto por cuanto no posee vida macrobiótica. En el salto el afluente recibe un poco de oxigenación, no obstante dicha situación ocurre tan solo en aquellas épocas del año cuando se permite el paso de las aguas por las puertas de Alicachín, lo anterior en razón al bombeo que se hace al embalse del Muña para la generación eléctrica, anulando todo caudal ambiental y/o ecológico que permite la existencia de ecosistemas y biodiversidad en la zona.

---

<sup>104</sup>Polvo, cromo, sulfuro de hidrogeno, entre otros afectan la calidad del agua, además de los desperdicios sólidos.

Expediente No. 25000-23-27-000-2001-0479-01  
Acumulados Nos. 2000-0428, 2001-0122, 2001-0343  
Actor: GUSTAVO MOYA ÁNGEL Y OTROS  
Acción Popular

En la referida cuenca media, el río se ve afectado por los vertimientos industriales, por la carga residual municipal diferente a Bogotá y, precisamente, por el Distrito Capital a causa de las aguas servidas de más de 7 millones y la mala disposición de residuos sólidos de los habitantes. Sin dejar de lado la carencia de plantas de tratamiento, las conexiones erradas, la limitada rehabilitación de redes y los aportes sólidos de los procesos erosivos de los cerros orientales.

En cuanto al sistema hídrico de la ciudad de Bogotá, esto es, el canal Torca y los ríos Salitre, Fucha y Tunjuelo, la situación no es menor. Las canteras ubicadas en el nororiente de la ciudad, las curtiembres, los gravilleros, las descargas puntuales y no puntuales de aguas residuales e industriales son reflejo de ello.

Los más perjudicados de una u otra forma son los municipios aguas abajo de Bogotá, esto por cuanto además de recibir el recurso hídrico en estado anóxico, cuentan con baja disponibilidad de agua para el consumo humano y el desarrollo de actividades agropecuarias seguras con parámetros aceptables para la salud.

No se pueden dejar de lado los negativos efectos económicos, sociales y ambientales como consecuencia de la emergencia del año de 2010 por cuenta de las inundaciones en la sabana y, por supuesto, en el propio perímetro urbano de la ciudad, por el desbordamiento del río a causa del cambio climático.

**Expediente No. 25000-23-27-000-2001-0479-01**  
**Acumulados Nos. 2000-0428, 2001-0122, 2001-0343**  
**Actor: GUSTAVO MOYA ÁNGEL Y OTROS**  
**Acción Popular**

Por lo demás, el ordenamiento territorial estratégico como herramienta clave en la planificación y gestión del territorio está prácticamente ausente y los instrumentos como las tasas retributivas y las tasas de uso no están siendo utilizados eficientemente.

En este contexto, la estrategia de mejoramiento ambiental de esta decisión surge a partir de los programas y líneas de acción del Plan de Manejo y Ordenamiento de la Cuenca del Río Bogotá (Pomca - 2006), del Proyecto de Adecuación Hidráulica y Recuperación Ambiental del Río Bogotá (CAR - 2011), del Plan de Gestión Ambiental 2008 - 2038 de la Secretaría Distrital de Ambiente y del Plan Departamental de Aguas - PDA de la Gobernación de Cundinamarca, que si bien son el punto de partida deben ser ajustados y articulados entre ellos, con los demás instrumentos de planeación para la gestión integral de la cuenca hidrográfica y con lo dispuesto en la presente decisión.

La estrategia y línea de acción de esta providencia consiste fundamentalmente en la realización de actividades y ejecución de planes, proyectos y programas en toda la cuenca, en el marco de los principios y objetivos que se establecerán, con sus respectivos componentes de monitoreo, control y seguimiento.

A continuación se presentarán los antecedentes y las estrategias de saneamiento ambiental de la cuenca del río Bogotá en marcha, previamente a las medidas que se adoptarán por esta Corporación.

Expediente No. 25000-23-27-000-2001-0479-01  
 Acumulados Nos. 2000-0428, 2001-0122, 2001-0343  
 Actor: GUSTAVO MOYA ÁNGEL Y OTROS  
 Acción Popular

#### I.4.3.4.1, ANTECEDENTES

Desde 1906 se han formulado diferentes políticas dirigidas al manejo ambiental del Río Bogotá, en especial para la cuenca media, todo con el fin de obtener índices favorables de recuperación y sostenibilidad de la cuenca hidrográfica.

En este sentido, entre 1927 y 1985 se elaboraron tres (3) planes maestros de Acueducto y Alcantarillado para Bogotá<sup>105106107</sup>, se formuló el Plan Maestro de Calidad de Aguas Superficiales<sup>108</sup>, se diseñaron la mayor parte de los sistemas que tiene hoy día la ciudad, se financió la construcción de una planta piloto con el fin de realizar un estudio de factibilidad para el tratamiento de las aguas residuales (1979), y se plantearon algunas otras estrategias para el saneamiento de la cuenca<sup>109110</sup>.

---

<sup>105</sup>En el año de 1962 se contrató por parte de la E.A.A.B. el primer Plan Maestro de Alcantarillado - CDM - CIS en el cual se recomendó realizar estudios en las lagunas aireadas en Tibabuyes.

<sup>106</sup>Con la contratación del segundo Plan Maestro de Alcantarillado (1974), se planteó por parte del Consorcio Camp Dresser & McKee Cei y Planhidro el tratamiento de las aguas en la Sabana y la construcción de una planta en Tocaima.

<sup>107</sup>El Consorcio Hidroestudios - Black & Weatch en el año de 1985, presentó el tercer Plan Maestro de Alcantarillado.

<sup>108</sup>En 1988 y con el apoyo del Gobierno de Holanda, se contrató la firma Haskoning, quien formuló el Plan Maestro de Calidad de Aguas Superficiales, estableciendo como área prioritaria de atención, la parte alta del Río Bogotá, dado el impacto ambiental, económico y social de su contaminación.

<sup>109</sup> En 1979 se propuso la construcción de un interceptor para llevar las aguas residuales de la ciudad de Bogotá a la planta de tratamiento que se construiría en Tunjuelo (1979).

<sup>110</sup>En 1989 y a partir del estudio realizado por la firma Bywater, se propuso como alternativa para el control de vertimientos provenientes de la ciudad de Bogotá, la construcción de tres plantas de tratamiento de aguas residuales localizadas en la desembocadura de los Ríos Salitre, Fucha y Tunjuelo.

Expediente No. 25000-23-27-000-2001-0479-01  
Acumulados Nos. 2000-0428, 2001-0122, 2001-0343  
Actor: GUSTAVO MOYA ÁNGEL Y OTROS  
Acción Popular

De manera más concreta y dada la gravedad ambiental que se estaba observando (1988), a instancias del Alcalde, algunas firmas propusieron un plan por etapas - interceptores y plantas de tratamiento en los ríos Salitre, Fucha y Tunjuelo - sin embargo el proceso no culminó por el cambio de administración.

Fue entonces con la creación del Comité Interinstitucional del Río Bogotá en 1990<sup>111</sup>, conformado por la Alcaldía Mayor de Bogotá a través del entonces Departamento Administrativo de Medio Ambiente - DAMA, el Departamento Nacional de Planeación - DNP, la Corporación Autónoma Regional de Cundinamarca - CAR, la Gobernación de Cundinamarca y la Empresa de Acueducto y Alcantarillado de Bogotá - E.A.A.B.<sup>112</sup>, que de manera activa e integrada se empezaron a realizar reuniones y aportes para el manejo y recuperación de la cuenca; en el marco de ese ejercicio se suscribieron sendos documentos de los cuales se puede extraer el denominado "*Estrategias de Manejo del Río Bogotá*", en donde se plasmó por primera vez la necesidad de que el proyecto de "*rehabilitación y saneamiento del Río Bogotá*" debía desarrollarse de manera integral, considerando el impacto local, regional y nacional.

---

<sup>111</sup> En el mismo año, primer semestre, el Banco Mundial adelantó una misión en Colombia con el fin de evaluar las soluciones relacionadas con la descontaminación del Río. Las conclusiones de los funcionarios del Banco se centraron en la necesidad de construir un gran interceptor a lo largo del río y una planta de tratamiento en la Sabana o en Tocaima, además sugirió la adopción de una política nacional para el tratamiento de las aguas residuales.

<sup>112</sup> El comité tenía como función la definición de la estrategia para la descontaminación del Río teniendo como base los resultados de los estudios contratados.

Expediente No. 25000-23-27-000-2001-0479-01  
Acumulados Nos. 2000-0428, 2001-0122, 2001-0343  
Actor: GUSTAVO MOYA ÁNGEL Y OTROS  
Acción Popular

Ya, en la administración del entonces Alcalde Jaime Castro, se solicitó al Gobierno Nacional apoyo en la financiación del proyecto de descontaminación del Río Bogotá, contemplado en el Acuerdo 31 que aprobó el Plan de Desarrollo Económico y Social de Obras Públicas - 1993 - 1995, sin embargo el DNP lo negó por considerar que no existía una estrategia financiera, la mala situación económica del Distrito Capital, la insuficiente información de resultados, la ausencia de una solución regional, entre otros.

Posteriormente y siguiendo las recomendaciones del Comité Interinstitucional antes referido, fue que se logró que en 1992 el Fondo Nacional de Desarrollo Económico - FONDAE - financiara la contratación de la firma EPAM Ltda, con la finalidad de realizar un estudio para la evaluación de las diferentes propuestas para el tratamiento de las aguas residuales provenientes del Distrito Capital. Una de las propuestas fue seleccionada por el Comité.

En ese interregno se expidió la Ley 99/93, "*por la cual se crea el Ministerio del Medio Ambiente, se reordena el Sector Público encargado de la gestión y conservación del medio ambiente y los recursos naturales renovables, se organiza el Sistema Nacional Ambiental, SINA, y se dictan otras disposiciones*", que en su artículo 44 reglamentó el inciso 2º del artículo 317 de la Constitución Política, referente a la destinación de un porcentaje del impuesto predial, en el sentido que debía trasladarse a las entidades encargadas del manejo y conservación del ambiente y de los recursos naturales renovables, de

Expediente No. 25000-23-27-000-2001-0479-01  
Acumulados Nos. 2000-0428, 2001-0122, 2001-0343  
Actor: GUSTAVO MOYA ÁNGEL Y OTROS  
Acción Popular

acuerdo con los planes de desarrollo de los municipios del área de su jurisdicción.

De esta manera, la referida disposición prescribió que las entidades territoriales debían aportar entre el 15 y el 25.9% del recaudo del impuesto predial a las entidades encargadas del manejo ambiental y que el 50% del producto del correspondiente porcentaje de recaudo, debía destinarse a la gestión ambiental dentro del perímetro urbano del Municipio, Distrito o Área Municipal, cuando la población dentro del área fuere superior a 1.000.0000 de habitantes.

En Bogotá y de acuerdo con el Decreto 1339 de 1994, los recursos recaudados por ese concepto fueron trasladados al Departamento Administrativo del Medio Ambiente - DAMA - hoy Secretaría Distrital de Ambiente. Posteriormente el Concejo de Bogotá estableció en 15% el porcentaje a destinar para la protección ambiental y a través del Acuerdo 14 de 1996, dispuso que estos recursos debían destinarse exclusivamente al Fondo de Tratamiento de Aguas Residuales - Río Bogotá. Con la declaratoria de nulidad del Decreto 1339 en lo que se refiere a que el porcentaje fuera para el DAMA se trasladaron los recursos a la CAR.

Ahora bien, con la selección de la alternativa propuesta por la firma Epam Ltda., se dio apertura al proceso licitatorio 001 de 1994 - Resolución 223 del 31 de

Expediente No. 25000-23-27-000-2001-0479-01  
Acumulados Nos. 2000-0428, 2001-0122, 2001-0343  
Actor: GUSTAVO MOYA ÁNGEL Y OTROS  
Acción Popular

enero<sup>113</sup> -, el cual fue adjudicado por medio de la Resolución 1028 de agosto de 1994 y se suscribió el contrato de concesión 015 de 1994 con Degremont y Lyonnaise Des Eaux, para el diseño, construcción y operación de la primera fase de la Planta El Salitre<sup>114115</sup>.

Con el fin de administrar los recursos para la financiación del proyecto de saneamiento y teniendo como fundamento el Decreto 1339, el Alcalde de Bogotá expidió el Decreto Distrital 748 de noviembre de 1995, por medio del cual se creó el Fondo Cuenta denominado Fondo de Tratamiento de Aguas Residuales del Río Bogotá. En dicha norma se estableció que el fondo se integraría con el 7.5% del porcentaje ambiental, el 2.6% del total de las regalías a través del Fondo Nacional de Regalías, los recursos del fondo ambiental de la E.A.A.B. recursos del Gobierno Nacional y del Distrito y los rendimientos del Fondo.

De otro lado y como requisito necesario para la ejecución del proyecto de saneamiento del río Bogotá, se requería la expedición de la licencia ambiental por parte del Ministerio de Ambiente Vivienda y Desarrollo Territorial, entidad que en 1997 y luego de la solicitud presentada la expidió - Resolución 817 -, sin embargo en ella se autorizó únicamente el diseño, construcción, operación y

---

<sup>113</sup>Se presentaron las firmas: Bywater, el Consorcio conformado por Dragados S.A. y Construcciones S.A., Corfinsura S.A. y Concreto S.A. y Degremont S.A. y Lyonnaise Des Eaux.

<sup>114</sup>El contrato tenía vigencia de 30 años, 3 de construcción y 27 de operación, supedita la segunda fase a la aprobación del Distrito.

<sup>115</sup>El DAMA adjudica a Hidrotec Ltda & Hans Wolf and Partner la interventoría del contrato 015 de 1994.

Expediente No. 25000-23-27-000-2001-0479-01  
 Acumulados Nos. 2000-0428, 2001-0122, 2001-0343  
 Actor: GUSTAVO MOYA ÁNGEL Y OTROS  
 Acción Popular

demás actividades de la planta de tratamiento del río Salitre - artículo 2º - <sup>116117</sup>.

Tiempo después y ante la necesidad de recursos para el financiamiento del proyecto, se suscribió el convenio 250 del 1 de septiembre de 1997, entre la CAR y el Distrito Capital, en él se dispuso que el 7.5% del recaudo destinado para la protección ambiental en el perímetro urbano, se debía invertir en el proyecto de descontaminación del río, lo anterior se realizaría a través del pago al concesionario del contrato 015 de 1994.

---

<sup>116</sup> A través del Decreto 501 de 1998 y 451 de 2000, se ampliaron las actividades en las que se podía financiar el proyecto de Río Bogotá, tales como:

- a. Diseño y construcción de áreas de amortiguamiento de impacto ambiental.
- b. Vigilancia y cerramiento de los terrenos aledaños al entregado en desarrollo del contrato 015 de 1995, para la construcción de la planta de tratamiento para la descontaminación del Río Bogotá, y de los adquiridos para la construcción de las plantas de tratamiento de los Ríos Fucha y Tunjuelo.
- c. Diseño y construcción de áreas de amortiguamiento del impacto ambiental.
- d. Vigilancia y cerramiento de los terrenos adquiridos para la construcción de plantas de tratamiento, mientras éstos no deban ser asumidos por el respectivo contratista o concesionario.
- e. Vigilancia y cerramiento de los predios adquiridos para disposición de Lodos o biosólidos.
- f. Realización de ensayos de recuperación de suelos o áreas degradadas y monitoreo de los mismos.
- g. Compensación por posibles daños ambientales derivados de la disposición de Lodos o biosólidos.
- h. Los demás, que estén directamente relacionados con la descontaminación del Río Bogotá.

<sup>117</sup>En 2001, el Ministerio de Medio Ambiente expidió la Resolución 577 a través de la cual modificó la licencia ambiental 817 e impuso el programa de control de contaminación de los vertimientos, entre otros aspectos. Se autorizó la disposición de los lodos en el relleno sanitario Doña Juana - Resolución 362 - para lo cual se suscribió el contrato con Proactiva S.A. E.S.P.

Expediente No. 25000-23-27-000-2001-0479-01  
Acumulados Nos. 2000-0428, 2001-0122, 2001-0343  
Actor: GUSTAVO MOYA ÁNGEL Y OTROS  
Acción Popular

Como la situación general de la cuenca continuó en circunstancias preocupantes, en 1999 se convocó a instancia de la Procuraduría General de la Nación la reunión que se denominó "*Espacio de reflexión y acercamiento sobre el tema de mejoramiento de la calidad ambiental del río*". Como resultado se firmó un acta en la que se definió la necesidad de establecer un grupo técnico de reconocida independencia y calidad que acompañe el proceso. El compromiso fue asumido por la E.A.A.B., Codensa, Emgesa, la Gobernación de Cundinamarca, la CAR y el DAMA.

Como resultado de lo anterior, en febrero de 2000 la E.A.A.B. contrató a la Unión Temporal Saneamiento Río Bogotá para que realizara un estudio sobre los lineamientos a seguir para la recuperación del río. Como conclusión del estudio se precisó que no era muy beneficiosa la alternativa referida a la existencia de tres (3) plantas de tratamiento y que en su reemplazo se proponía la ampliación de la planta de El Salitre y la construcción de una segunda en Soacha o alternativamente en Tunjuelo.

En el 2000 el Distrito Capital adoptó el Plan de Ordenamiento Territorial - POT para la ciudad, - Decreto 619 de 2000 -. El artículo 60 se refirió al sistema de tratamiento de aguas residuales, al respecto definió el cronograma para la construcción del sistema de tratamiento de la ciudad. Se refirió al desarrollo de la Fase II de la planta de El Salitre y la construcción de las plantas de Fucha y Tunjuelo, no obstante señaló que las alternativas se encontraban sujetas a la evaluación

Expediente No. 25000-23-27-000-2001-0479-01  
Acumulados Nos. 2000-0428, 2001-0122, 2001-0343  
Actor: GUSTAVO MOYA ÁNGEL Y OTROS  
Acción Popular

técnica, jurídica y financiera que se debían desarrollar. El parágrafo 4º dispuso que *"el Desarrollo del programa de tratamiento de los vertimientos del Río Bogotá estaría sujeto a los resultados de los estudios de viabilidad técnica y financiera que realizará la Administración. Dichos estudios considerarán diferentes formas de tratamiento, según los avances tecnológicos del momento y fórmulas de financiación concordantes con las prioridades de la inversión distrital"*.

Teniendo en cuenta lo dispuesto por el POT, las recomendaciones de la Procuraduría General de la Nación y del Comité Consultivo del Río, en noviembre de 2001 la E.A.A.B. contrató a la Unión Temporal Saneamiento del Río Bogotá, a Water Research Centre de Inglaterra WRc PLCV y a la Universidad de los Andes con el fin de revisar las alternativas para el saneamiento de la Cuenca del Río. De los estudios se recomendó el cambio del esquema del año 1993 por razones de costo, financiamiento, técnicas y de tiempo. La alternativa propuesta fue la ampliación de la planta de El Salitre a 8 m<sup>3</sup>/s para el tratamiento de las aguas residuales generadas en la cuenda del Río Salitre, la recolección de las aguas generadas en las cuencas de los Ríos Fucha, Tunjuelo y Soacha por medio de interceptores y el posterior tratamiento de las mismas en una planta localizada en el Municipio de Soacha, Vereda Canoas. Se plasmó que con la implementación y ejecución de esa alternativa se lograría la remoción de la carga contaminante proveniente de la cuenca media.

El Distrito modificó el POT de la ciudad de Bogotá a través del Decreto 469 de 2003, en su artículo 106

Expediente No. 25000-23-27-000-2001-0479-01  
Acumulados Nos. 2000-0428, 2001-0122, 2001-0343  
Actor: GUSTAVO MOYA ÁNGEL Y OTROS  
Acción Popular

modificatorio del artículo 60 del Decreto 619 de 2000, se estableció el nuevo esquema de saneamiento del Río Bogotá.

Para el cambio de estrategia y la modificación del esquema de saneamiento del río previsto en el año de 1993, se tuvieron en cuenta los siguientes documentos:

- *"Informes de operación y mantenimiento de la PTAR Salitre"*. Unión Temporal Hans Wolf & Partner GMBH e Hidrotec, 2001.
- *"Evaluación Técnica de la PTAR Salitre"*. Water Research Center. Agosto, 2002
- *"Usos y Estándares de la Calidad del Río Bogotá"*. Unión Temporal. Agosto, 2002.
- *"Captación de las Aguas Residuales de la Cuenca Salitre"*. Carlos Giraldo López. Julio, 2003.
- *"Análisis de la Situación de la PTAR Salitre desde la Perspectiva Técnico Ambiental"*. Instituto Quinaxi
- Carlos Giraldo López. Julio, 2003
- *"Programa de Saneamiento del Río Bogotá. Definición de la Alternativa a Seguir"*. Unión Temporal Saneamiento del Río Bogotá. Agosto, 2003.
- *"Informe de Alternativas frente al Contrato 015 de 1994"*. Rodríguez Azuero Asociados S.A., 2003.
- *"Análisis Financiero del Contrato 015 de 1994"*. Taller de Estrategia, 2003.

En cuanto a los instrumentos normativos, a través del documento Conpes 3256 de 2003, se fijaron las Políticas y Estrategias para la Gestión concertada del Desarrollo de la Región Bogotá - Cundinamarca en el cual se plasmó que

Expediente No. 25000-23-27-000-2001-0479-01  
Acumulados Nos. 2000-0428, 2001-0122, 2001-0343  
Actor: GUSTAVO MOYA ÁNGEL Y OTROS  
Acción Popular

*"con relación al tema del Río Bogotá, el Gobierno Nacional en coordinación con las entidades territoriales e instituciones pertinentes, promoverá la formulación de un documento Conpes orientado a definir las acciones que se deben emprender desde los distintos niveles para descontaminación y manejo integral Río Bogotá", lo anterior motivó la suscripción del documento Conpes 3320 en 2004.*

El Distrito liquidó el contrato 015 de 1994 (2003), suscrito con la sociedad Bogotana de Aguas para la operación de la planta de tratamiento del El Salitre y a partir del 1º de julio la E.A.A.B. empezó a operar la planta.

A través del Acuerdo 028 de 2005, la CAR creó el Fondo para las Inversiones Ambientales en el Perímetro Urbano de Bogotá - FIAB- como instrumento financiero para garantizar la destinación de los recursos provenientes del 7.5% del impuesto predial que transfiere el Distrito.

En el 2006, la CAR adoptó el Plan de Manejo y Ordenamiento de la Cuenca del Río Bogotá - POMCA -, en el cual dispuso la ejecución de los proyectos de adecuación hidráulica del Río y la ampliación y optimización de la planta de tratamiento de El Salitre.

Mediante Acuerdo 043 de 2006, la misma Corporación definió los objetivos de calidad mínima que debe tener el río Bogotá en sus diferentes tramos.

Expediente No. 25000-23-27-000-2001-0479-01  
Acumulados Nos. 2000-0428, 2001-0122, 2001-0343  
Actor: GUSTAVO MOYA ÁNGEL Y OTROS  
Acción Popular

Adicional a lo anterior, se suscribieron los siguientes convenios:

- Convenio Interadministrativo entre la Corporación Autónoma Regional de Cundinamarca - CAR, Distrito Capital - Secretaría de Ambiente - y Empresa de Acueducto y Alcantarillado de Bogotá - E.A.A.B. - (171 de junio de 2007), el objetivo es aunar esfuerzos para contribuir al saneamiento del río Bogotá en el marco del que se ha denominado "*Megaproyecto Río Bogotá*".
- Acuerdo de cooperación para la construcción de la planta de tratamiento de aguas residuales de canoas (fase I y II y su estación elevadora dentro del programa de saneamiento del río Bogotá, en el contexto de la región Capital, Bogotá Cundinamarca (21 de febrero de 2011).
- Convenio Interadministrativo de Cooperación suscrito entre el Ministerio de Vivienda, Ciudad y Territorio, la Alcaldía Mayor de Bogotá y la Empresa de Acueducto y Alcantarillado de Bogotá, el cual tiene por objeto aunar esfuerzos para la ejecución del proyecto "*Construcción de la Estación Elevadora de Aguas residuales Canoas para el Distrito Capital de Bogotá*".
- Convenio Interinstitucional entre Emgesa S.A. y E.S.P. y la Empresa de Acueducto y Alcantarillado de Bogotá E.S.P., que tiene por objeto aunar esfuerzos para garantizar la construcción de la

Expediente No. 25000-23-27-000-2001-0479-01  
Acumulados Nos. 2000-0428, 2001-0122, 2001-0343  
Actor: GUSTAVO MOYA ÁNGEL Y OTROS  
Acción Popular

Estación Elevadora Canoas, mediante aporte económico, de operación, mantenimiento y suministro de energía, por parte de Emgesa.

Finalmente, en el marco de la estrategia para el manejo ambiental del río Bogotá propuesta por el Consejo Nacional de Política Económica y Social - CONPES en su documento 3320 y en los compromisos concertados entre la CAR y la E.A.A.B. se formuló el proyecto de Adecuación Hidráulica y Recuperación Ambiental del río Bogotá.

El objetivo del proyecto es la transformación del río Bogotá, mediante el mejoramiento de la calidad del agua, la reducción de los riesgos de inundación y la creación de áreas multifuncionales a lo largo del río.

#### **I.4.3.4.2. PLANES DE GESTIÓN AMBIENTAL EN MARCHA EN LA CUENCA HIDROGRÁFICA DEL RÍO BOGOTÁ**

Actualmente y dentro de los procesos de gestión ambiental adoptados y en ejecución en relación con la cuenca hidrográfica del Río Bogotá, la Sala encuentra los siguientes:

#### **I.4.3.4.3. CONSEJO NACIONAL DE POLÍTICA ECONÓMICA Y SOCIAL DOCUMENTO CONPES 3320 DE 2004**

En atención a la estrategia de manejo del Río Bogotá, se presentó el plan de acción que recogió las soluciones técnicas propuestas por las diferentes entidades, como marco de referencia para la búsqueda de soluciones costo-efectivas para el saneamiento ambiental del Río Bogotá de la siguiente manera:

Expediente No. 25000-23-27-000-2001-0479-01  
Acumulados Nos. 2000-0428, 2001-0122, 2001-0343  
Actor: GUSTAVO MOYA ÁNGEL Y OTROS  
Acción Popular

- Elaboración del plan de ordenamiento y manejo de la Cuenca.
- Plan de inversión de los Municipios de la Cuenca Alta, Media Occidental y Baja, sin Bogotá
- Intervención en el Embalse del Muña. Se consideró pertinente establecer los siguientes criterios para el manejo ambiental del embalse:
  - Control del buchón y adecuada disposición.
  - Separación de las aguas del Río Bogotá y de las aguas de las quebradas Muña y Aguas Claras
  - Control de vectores.
  - Acciones de descontaminación de las aguas y tratamiento de lodos del cuerpo principal del embalse.
- Para garantizar la eficacia de las obras contempladas para el mejoramiento ambiental del Embalse del Muña, es necesario tratar las aguas del casco urbano del municipio de Sibaté, cuyo costo ha sido estimado en \$1.520 millones 22.
- Incorporación de los costos de alcantarillado en las tarifas.
- Aplicación del esquema de tasas.
- Esquemas Regionales.
- Fomento a la producción más limpia.
- Continuidad y fortalecimiento en las funciones de control.
- Recuperación Área Forestal Protectora - Cuenca Alta del Río Bogotá.
- Reubicación de hogares vinculados a curtiembres.

Expediente No. 25000-23-27-000-2001-0479-01  
Acumulados Nos. 2000-0428, 2001-0122, 2001-0343  
Actor: GUSTAVO MOYA ÁNGEL Y OTROS  
Acción Popular

**I.4.3.4.4. CORPORACIÓN AUTÓNOMA REGIONAL DE CUNDINAMARCA CAR - PLAN DE MANEJO DE ORDENACIÓN Y MANEJO DE LA CUENCA HIDROGRÁFICA DEL RÍO BOGOTÁ - POMCA 2006 - 2019**

El Decreto 1729 de 2002, estableció los lineamientos y fases para la ordenación de cuencas hidrográficas y definió que el proceso de ordenación de una cuenca tiene por objeto principal el planeamiento del uso y manejo sostenible de sus recursos naturales renovables, de manera que se consiga mantener o restablecer un adecuado equilibrio entre el aprovechamiento económico de tales recursos y la conservación de la estructura físico - biótica de la cuenca y particularmente de sus recursos hídricos.

La Corporación Autónoma Regional de Cundinamarca contrató la elaboración del diagnóstico, prospectiva y formulación de la cuenca hidrográfica del río Bogotá; mediante la Resolución 3194 de 2006 el Pomca fue adoptado como instrumento de planificación de las acciones de la cuenca.

El objetivo principal del POMCA es lograr el aprovechamiento sostenible, la conservación, restauración y protección adecuada de los recursos naturales renovables del área de la cuenca del Río Bogotá, a través de un proceso de planificación integral que considere los aspectos socioeconómicos, técnicos, institucionales y ambientales y con énfasis en los recursos hídricos. En relación con la cuenca, el POMCA establece los siguientes objetivos:

Expediente No. 25000-23-27-000-2001-0479-01  
Acumulados Nos. 2000-0428, 2001-0122, 2001-0343  
Actor: GUSTAVO MOYA ÁNGEL Y OTROS  
Acción Popular

- Lograr los objetivos de calidad establecidos para el recurso hídrico de la cuenca del río Bogotá.
- Buscar el aprovechamiento sostenible de los recursos naturales renovables según su potencialidad y técnicas disponibles, buscando una producción y rendimiento sostenidos con la menor alteración posible del medio ambiente.
- Implementar en áreas críticas planes detallados y proyectos específicos tendientes a lograr el control y rehabilitación de áreas severamente degradadas.
- Poner en marcha programas y proyectos de conservación, de restauración, de protección y productivos, que sustenten el Plan General.
- Regular y preservar los recursos hídricos para el uso doméstico, agropecuario, industrial y otros.
- Promover la producción limpia, encaminada a reorientar la producción introduciendo tecnologías limpias y sistemas de gestión ambientalmente sanos en sus procesos.
- Promover e incentivar la participación de la población rural en las actividades del aprovechamiento adecuado y de prácticas de conservación de los recursos naturales renovables.
- Capacitar al personal técnico y población campesina del área en aspectos técnicos de la conservación y manejo de los recursos tierra y agua y de las cuencas hidrográficas.
- Implementar planes de acción específicos para áreas naturales que deben estar bajo regímenes especiales de administración.

Expediente No. 25000-23-27-000-2001-0479-01  
Acumulados Nos. 2000-0428, 2001-0122, 2001-0343  
Actor: GUSTAVO MOYA ÁNGEL Y OTROS  
Acción Popular

- Desarrollar una gestión ambiental sostenible, con el fin de aumentar la renovabilidad del capital natural y prevenir el deterioro ambiental de los ecosistemas de mayor valor por sus servicios ecológicos.

Para el cumplimiento de los objetivos, el POMCA estableció los siguientes programas estratégicos:

**Saneamiento Básico:** Entre sus más importantes proyectos están los siguientes:

- Construcción de sistemas de tratamiento de aguas residuales veredales, baterías sanitarias y pozos sépticos.
- Construcción de Plantas de Tratamiento de Aguas Residuales.
- Sistemas de tratamiento de aguas residuales industriales.
- Planes Maestros de Alcantarillado.
- Planes de Saneamiento y Manejo de Vertimientos.
- Planes de Gestión Integral de Residuos Sólidos.
- Implementación de sistemas de tratamiento de los mataderos municipales.
- Manejo y control de residuos sólidos y líquidos derivados de los sistemas de producción agropecuarios.

**Abastecimiento de agua potable:** Dentro de los proyectos incluidos en este programa se encuentran:

- Construcción de sistemas de agua potable veredales

Expediente No. 25000-23-27-000-2001-0479-01  
Acumulados Nos. 2000-0428, 2001-0122, 2001-0343  
Actor: GUSTAVO MOYA ÁNGEL Y OTROS  
Acción Popular

- Planes Maestros de Acueducto para los cascos urbanos.
- Estudio de fuentes de abastecimiento de agua.

**Conservación y Protección de cuerpos de agua:** Dentro de los proyectos incluidos en este programa se encuentran:

- Planes de regulación de corrientes.
- Programa recuperación embalse del Muña.
- Dragado y limpieza de cauces.
- Sondeo de pozos profundos para aguas de riego.
- Reglamentación de cuencas.
- Protección con rondas en la red primaria y proyectos legales de reversión a la propiedad pública.
- Clarificación de predios en zonas de humedales propensas a ampliación de la frontera agrícola.
- Estudio de niveles de inundación para diferentes periodos de retorno en los cauces principales.
- Programa de uso eficiente del agua.
- Control permanente de la demanda hídrica.
- Saneamiento Ambiental y manejo hídrico de humedales.

**Programa estratégico de conservación y protección de cuerpos de agua:** Dentro de los proyectos incluidos en este programa se encuentran:

- Planes de regulación de corrientes.
- Programa recuperación embalse del Muña.
- Dragado y limpieza de cauces.
- Sondeo de pozos profundos para aguas de riego.
- Reglamentación de cuencas.

Expediente No. 25000-23-27-000-2001-0479-01  
Acumulados Nos. 2000-0428, 2001-0122, 2001-0343  
Actor: GUSTAVO MOYA ÁNGEL Y OTROS  
Acción Popular

- Protección con rondas en la red primaria y proyectos legales de reversión a la propiedad pública.
- Clarificación de predios en zonas de humedales propensas a ampliación de la frontera agrícola.
- Estudio de niveles de inundación para diferentes periodos de retorno en los cauces principales.
- Programa de uso eficiente del agua.
- Control permanente de la demanda hídrica.
- Saneamiento Ambiental y manejo hídrico de humedales.

**Programa estratégico de desarrollo agropecuario:** Dentro de los proyectos incluidos en este programa se encuentran:

- Fomento de actividades de producción limpia.
- Incentivo para establecer, mantener y recuperar sistemas de producción forestal y agroforestal en zonas de aptitud forestal y agroforestal.
- Ampliación y optimización de Distritos de riego.
- Realización del control de contaminación por agroquímicos en zonas Agrícolas.
- Establecimiento de cercas vivas.
- Incentivar la actividad piscícola.
- Desarrollo de empresas agropecuarias tecnificadas (centros de acopio, agroindustria, cadenas productivas).
- Estudio viabilidad Distritos de riego.
- Planes de recuperación de suelos degradados.

Expediente No. 25000-23-27-000-2001-0479-01  
Acumulados Nos. 2000-0428, 2001-0122, 2001-0343  
Actor: GUSTAVO MOYA ÁNGEL Y OTROS  
Acción Popular

**Programa estratégico de desarrollo industrial y agroindustrial.** Dentro de los proyectos incluidos en este programa se encuentran:

- Reconversión tecnológica obligatoria de curtiembres.
- Estudio, monitoreo y control emisiones-residuos en zonas industriales (Planes de manejo).
- Monitoreo a procesos de empresas agropecuarias tecnificadas.

**Programa estratégico de desarrollo sostenible de la minería.** Dentro de los proyectos incluidos en este programa se encuentran:

- Recuperación de las áreas degradadas por actividades mineras como es el caso de las explotaciones en canteras activas, inactivas y abandonadas.
- Manejo Integrado de la Minería.
- Control de la explotación de canteras con planes de manejo.

**Programa estratégico de desarrollo socioeconómico.** Dentro de los proyectos incluidos en este programa se encuentran:

- Planes de turismo receptivo, agroturismo y ecoturismo.

Expediente No. 25000-23-27-000-2001-0479-01  
Acumulados Nos. 2000-0428, 2001-0122, 2001-0343  
Actor: GUSTAVO MOYA ÁNGEL Y OTROS  
Acción Popular

- Programa de educación ambiental.
- Programas que despierten el sentido de pertenencia de la población flotante (desplazados).
- Parques Ecológicos.

**Programa estratégico de desarrollo urbano.** Dentro de los proyectos incluidos en este programa relacionan:

- Estudio y manejo del espacio público en la zona urbana.
- Estudio y monitoreo en sitios críticos donde hay cambio de uso del suelo.
- Control de condominios.

**Programa estratégico de conservación, restauración y uso sostenible de ecosistemas estratégicos.** Dentro de los proyectos incluidos en este programa se reportan:

- Fomento del Ecoturismo.
- Restauración de ecosistemas.
- Zonas de conservación de fauna.
- Protección y reforestación zonas de nacimientos de agua para abastecimiento de acueductos.
- Proyecto adquisición de predios de reserva hídrica.
- Reglamentación de áreas importantes para la conservación de aves: AICAS.

Expediente No. 25000-23-27-000-2001-0479-01  
Acumulados Nos. 2000-0428, 2001-0122, 2001-0343  
Actor: GUSTAVO MOYA ÁNGEL Y OTROS  
Acción Popular

- Cambio del uso del suelo en zonas de aptitud ambiental
- Investigación biótica en las zonas de Reserva Natural Protectora.
- Conservación de ecosistemas.

**I.4.3.4.5. CORPORACIÓN AUTÓNOMA REGIONAL DE CUNDINAMARCA - CAR  
PROYECTO DE ADECUACIÓN HIDRÁULICA Y RECUPERACIÓN AMBIENTAL DEL RÍO  
BOGOTÁ - 2011**

La Corporación Autónoma Regional de Cundinamarca - CAR, tiene a cargo la ejecución del proyecto Adecuación Hidráulica y Recuperación Ambiental del río Bogotá - AHRARB. Este proyecto se enmarca en la "*Estrategia para el manejo ambiental del río Bogotá*" propuesta por el Consejo Nacional de Política Económica y Social -CONPES en su documento 3320 y en los compromisos concertados entre la CAR y la Empresa de Acueducto y Alcantarillado de Bogotá - E.A.A.B., para la recuperación del Río Bogotá y la prevención de inundaciones en Bogotá.

Con dicho plan se pretende desarrollar actividades sobre la cuenca media del río Bogotá, en el tramo de 68 Km., comprendidos entre las compuertas de Alicachín en el Municipio de Soacha y la estación de Puente la Virgen en el Municipio de Cota.

El objetivo del proyecto es transformar el río Bogotá, mediante el mejoramiento de la calidad del agua, la reducción de los riesgos por inundación y la creación de áreas multifuncionales a lo largo del río, recuperando

Expediente No. 25000-23-27-000-2001-0479-01  
Acumulados Nos. 2000-0428, 2001-0122, 2001-0343  
Actor: GUSTAVO MOYA ÁNGEL Y OTROS  
Acción Popular

este recurso hídrico como un activo para la región y para la ciudad de Bogotá.

El proyecto se estructuró en cuatro (4) componentes:

**Componente 1:** Ampliación y Optimización de la Planta de Tratamiento de Aguas Residuales (PTAR) El Salitre: La ampliación y optimización de la PTAR Salitre de 4 m<sup>3</sup>/s con tratamiento primario a un caudal promedio de 8 m<sup>3</sup>/s con tratamiento secundario y desinfección.

**Componente 2:** Adecuación Hidráulica y Mejoramiento Ambiental: La adecuación hidráulica en un tramo de 68 Km. desde Puente la Virgen hasta las compuertas de Alicachín y la creación y mejoramiento de áreas multifuncionales a lo largo del río que contribuyan a la restauración de ecosistemas, el mejoramiento de la calidad del agua y la integración urbano-paisajístico en los espacios públicos.

**Componente 3:** Estudios para el Manejo Integrado de la Cuenca: Estudios y asistencia técnica directamente vinculados a la sostenibilidad del proyecto, tales como un plan de manejo integral del agua en la Cuenca del río Bogotá, un plan para la gestión de biosólidos provenientes de las PTAR en la Ciudad de Bogotá y un estudio de ingeniería para el mejoramiento ambiental y mantenimiento de las obras del río Bogotá.

**Componente 4:** (*Administración y Gerencia*): Actividades relacionadas a la administración y gerencia del proyecto.

Expediente No. 25000-23-27-000-2001-0479-01  
Acumulados Nos. 2000-0428, 2001-0122, 2001-0343  
Actor: GUSTAVO MOYA ÁNGEL Y OTROS  
Acción Popular

**I.4.3.4.6. DISTRITO CAPITAL SECRETARÍA DISTRITAL DE AMBIENTE - PLAN  
DE GESTIÓN AMBIENTAL DEL DISTRITO CAPITAL - P.G.A. 2008 - 2038**

Se trata del instrumento de planeación ambiental de largo plazo de Bogotá, en el área de su jurisdicción, que permite y orienta la gestión ambiental de todos los actores estratégicos distritales, con el propósito de que los procesos de desarrollo propendan por la sostenibilidad en el territorio distrital y en la región.

Se plasmó en dicho documento que cualquier estrategia e intervención sobre el territorio debe corresponder y estar conforme con los lineamientos ambientales del P.G.A., el cual se hace operativo a través de los instrumentos de planeación ambiental de corto plazo y de alcances específicos.

En lo atinente a la calidad del agua y regulación hidrológica mencionó:

Con este objetivo se busca contribuir en la recuperación y mantenimiento de la calidad fisicoquímica y biológica del agua en los humedales, lagos, ríos, quebradas, canales y reservas subterráneas del territorio distrital y la regulación hidrológica de las cuencas, conforme a las normas vigentes.

Teniendo en cuenta que el agua es el recurso ordenador de la gestión ambiental, resulta importante contribuir con su recuperación y preservación, especialmente en el caso de cuencas con cauces en sectores urbanos, donde la concentración de los flujos de materiales, en el marco de

Expediente No. 25000-23-27-000-2001-0479-01  
Acumulados Nos. 2000-0428, 2001-0122, 2001-0343  
Actor: GUSTAVO MOYA ÁNGEL Y OTROS  
Acción Popular

la consolidación paulatina de la ciudad, hace que su calidad sea uno de los factores de compleja materialización.

En este contexto, según el P.G.A. el objetivo se fundamenta en acciones de recuperación hidráulica, sanitaria y biológica de los ecosistemas acuáticos deteriorados por décadas de contaminación y otros impactos típicamente urbanos.

Conservación y adecuado manejo de la fauna y la flora, pretendiendo con este objetivo intentar aportar a la restauración, preservación e incremento de la riqueza biológica del territorio distrital; de la cobertura vegetal nativa; y de la conectividad estructural y funcional de la Estructura Ecológica Principal. Así mismo, minimizar el tráfico o cría ilegal de especies de flora y fauna y procurar el rápido y eficiente retorno a su hábitat natural.

Menciona que la conservación y recuperación de la biodiversidad es de gran relevancia dentro de las áreas urbanas y rurales del Distrito Capital, "*...donde con una adecuada planificación y manejo del crecimiento y funcionamiento de las estructuras creadas se puede incrementar la riqueza biológica en todo el gradiente territorial. Junto al manejo de las transformaciones físicas del entorno urbanoregional, este objetivo tiene un aspecto adicional: el control de las actividades de explotación directa de la biodiversidad y, particularmente, la lucha contra el tráfico biológico ilícito*".

Expediente No. 25000-23-27-000-2001-0479-01  
Acumulados Nos. 2000-0428, 2001-0122, 2001-0343  
Actor: GUSTAVO MOYA ÁNGEL Y OTROS  
Acción Popular

### **Uso eficiente del agua**

Resalta que con este objetivo se propende por el mantenimiento de la oferta natural de agua mediante la conservación de los ecosistemas reguladores y el ciclo hidrológico regional, así como promover el consumo racional del recurso, la promoción de alternativas de producción más limpia y la sostenibilidad del desarrollo.

Así, señala que atiende a los parámetros de cantidad, regularidad (distribución temporal), accesibilidad (distribución espacial) y seguridad del recurso hídrico, obligando a una gestión integral de todos los elementos y procesos encadenados en el ciclo hidrológico, así como a la participación de todas las áreas y actores que en las cuencas y la región hacen parte del mismo.

Asevera que en términos particulares y de menor escala, como la institucional, se deberá garantizar el control sobre el uso del recurso, mediante revisiones periódicas de las instalaciones hidrosanitarias y de la promoción de una cultura de consumo racional del agua, incluyendo entre otros los siguientes aspectos:

- Revisión técnica de las condiciones actuales de las instalaciones.
- Cultura de consumo del recurso.
- Identificación de medidas racionales, para el ahorro.
- Identificación de impactos positivos y negativos de las medidas de reducción.

Expediente No. 25000-23-27-000-2001-0479-01  
Acumulados Nos. 2000-0428, 2001-0122, 2001-0343  
Actor: GUSTAVO MOYA ÁNGEL Y OTROS  
Acción Popular

- Estudio de alternativas de tecnologías limpias aplicables.
- Análisis de costos y beneficios.
- Evaluación del presupuesto necesario para la implementación del programa (adecuaciones físicas, medidas educativas, de mantenimiento y de operación).
- Desarrollo y evaluación del programa de ahorro de agua.

**I.4.3.4.7. GOBERNACIÓN DE CUNDINAMARCA - SECRETARÍA DEPARTAMENTAL DE AMBIENTE - PLAN DEPARTAMENTAL DE AGUAS - PDA**

El Programa de Agua y Saneamiento para la Prosperidad - Plan Departamental para el Manejo Empresarial de los Servicios de Agua y Saneamiento PAP-PDA, se creó con el fin de lograr la armonización integral de los recursos y la implementación de esquemas eficientes y sostenibles en la prestación de los servicios públicos domiciliarios de agua potable y saneamiento básico, a través de un conjunto de estrategias de planeación y coordinación interinstitucional formuladas y ejecutadas, teniendo en cuenta las características locales, la capacidad institucional de las entidades territoriales y personas prestadoras de los servicios públicos y la implementación efectiva de esquemas de regionalización.

Con la implementación de este programa se busca impulsar estrategias que permitan avanzar con mayor celeridad en la cobertura urbana y rural de los servicios de acueducto y saneamiento básico, así como las transformaciones para el manejo empresarial de estos servicios en el territorio Cundinamarqués.

Expediente No. 25000-23-27-000-2001-0479-01  
Acumulados Nos. 2000-0428, 2001-0122, 2001-0343  
Actor: GUSTAVO MOYA ÁNGEL Y OTROS  
Acción Popular

**Objetivos específicos:**

- Contribuir con el saneamiento ambiental de la cuenca del río Bogotá y demás cuencas presentes en el Departamento de Cundinamarca.
- Articular y focalizar las diferentes fuentes de financiación para la implementación del PDA-CND.
- Facilitar el acceso a esquemas eficientes de financiación para el sector.
- Optimizar el control sobre la asignación y ejecución de recursos y proyectos.
- Fomentar una adecuada planeación de inversiones y la formulación de proyectos integrales.
- Articular el desarrollo de proyectos con las políticas de desarrollo urbano. Buscar la pluralidad de oferentes y la publicidad en los procesos de contratación.

En el componente ambiental se refiere al programa descontaminación cuenca del río Bogotá, el cual tiene como objetivo el de contribuir a la descontaminación de la cuenca articulando acciones con los diferentes actores involucrados tanto públicos como privados, en el marco del Documento Conpes 3320 "*Estrategia para el Manejo Ambiental del Río Bogotá*".

Como subprograma está el relacionado con la protección y conservación de ecosistemas estratégicos. Las líneas de acción son las siguientes:

- Promover alianzas estratégicas que permitan la recuperación, protección, conservación y adecuada

Expediente No. 25000-23-27-000-2001-0479-01  
Acumulados Nos. 2000-0428, 2001-0122, 2001-0343  
Actor: GUSTAVO MOYA ÁNGEL Y OTROS  
Acción Popular

administración de los ecosistemas en cooperación con las autoridades ambientales, con los municipios y con las organizaciones no gubernamentales.

- Apoyar los programas nacionales, departamentales, regionales y municipales de conservación y protección ambiental.
- Promover y apoyar la adquisición de predios para la conservación del recurso hídrico.
- Ejecutar acciones tendientes a la rehabilitación y saneamiento ambiental de cuerpos de agua y ecosistemas estratégicos.

En lo atinente a las metas, se encuentran las siguientes:

- El PDA-CND adopta las metas del Plan Departamental de Desarrollo para su ejecución en coordinación con la Secretaría del Hábitat y Recursos Mineros o quien haga sus veces.
- Adquirir y/o mantener 4.680 hectáreas para la conservación y aseguramiento del recurso hídrico.
- Alcanzar una entrega en administración a municipios, comunidades organizadas u ONG's, del 40% de los predios adquiridos como zona de reserva hídrica.
- Elaborar un sistema de información geográfica para la administración y manejo de los predios adquiridos para la preservación del recurso hídrico.

El plan cuenta con dos subprogramas a saber:

**Planes de gestión integral de residuos sólidos:**

Busca:

Expediente No. 25000-23-27-000-2001-0479-01  
Acumulados Nos. 2000-0428, 2001-0122, 2001-0343  
Actor: GUSTAVO MOYA ÁNGEL Y OTROS  
Acción Popular

- Brindar apoyo y asistencia técnica a los municipios para la implementación y desarrollo de esquemas regionales para el manejo y disposición de sus residuos sólidos en el marco de los PGIRS.
- Implementación de proyectos regionales de tratamiento, aprovechamiento y disposición final de residuos sólidos en coordinación con el Distrito Capital.

#### **Uso eficiente y ahorro del agua:**

Busca:

- Adelantar capacitación a prestadores y usuarios de los servicios públicos domiciliarios de acueducto, sobre uso eficiente y ahorro del agua en el marco de la Ley 373.
- Teniendo en cuenta que Cundinamarca es un Departamento con un gran porcentaje de la población en la zona rural dispersa y en centros poblados se estableció un apoyo importante a estas comunidades en términos de incremento de cobertura con acueducto, construcción de plantas de tratamiento para agua potable, construcción de unidades sanitarias en zonas rurales dispersas, entre otros.

#### **I.4.3.5. PLAN DE GESTIÓN DEL CONSEJO DE ESTADO PARA EL MEJORAMIENTO AMBIENTAL Y SOCIAL DE LA CUENCA HIDROGRÁFICA DEL RÍO BOGOTÁ**

Como bien se precisó en las consideraciones preliminares de este componente, la Sala definirá el plan de mejoramiento ambiental para la cuenca, priorizado de

Expediente No. 25000-23-27-000-2001-0479-01  
Acumulados Nos. 2000-0428, 2001-0122, 2001-0343  
Actor: GUSTAVO MOYA ÁNGEL Y OTROS  
Acción Popular

acuerdo con la realidad procesal y probatoria obrante en el expediente, el cual, por lo demás, deberá articularse con los programas y líneas de acción del Plan de Manejo y Ordenamiento de la Cuenca del Río Bogotá (Pomca - 2006), del Proyecto de Adecuación Hidráulica y Recuperación Ambiental del Río Bogotá (CAR - 2011), del Plan de Gestión Ambiental 2008 - 2038 de la Secretaría Distrital de Ambiente y del Plan Departamental de Aguas - PDA de la Gobernación de Cundinamarca descritos líneas atrás, y los demás instrumentos normativos y de planeación para la gestión integral de la cuenca hidrográfica, tal y como se dispondrá en la parte resolutive de esta decisión.

En este sentido, el plan se fundamentará en unos principios, en una finalidad, con un objetivo general y otros específicos, los cuales serán monitoreados a través de la implementación de indicadores y mecanismos de seguimiento y evaluación.

#### **I.4.3.5.1 PRINCIPIOS**

La estrategia general y las líneas de acción para el mejoramiento ambiental de la cuenca hidrográfica de esta decisión se fundamentan en diez (10) principios orientadores a saber:

1. El agua es patrimonio de la Nación, bien de uso público, derecho fundamental y colectivo.
2. El agua es factor de desarrollo social, cultural y económico del país.
3. Las cuencas hidrográficas deben ser ordenadas y manejadas con un enfoque sistémico.

Expediente No. 25000-23-27-000-2001-0479-01  
Acumulados Nos. 2000-0428, 2001-0122, 2001-0343  
Actor: GUSTAVO MOYA ÁNGEL Y OTROS  
Acción Popular

4. La sostenibilidad y disponibilidad permanente del recurso hídrico es garantía para las generaciones presentes y futuras.
5. Los ecosistemas y la biodiversidad del país son objeto de protección prioritaria, al igual que las zonas de páramos, subpáramos, los nacimientos de agua y las zonas de recarga de acuíferos.
6. La prevención de desastres tiene relevancia especial y las medidas tomadas para evitar o reducir los efectos de su ocurrencia son de inobjetable observancia.
7. Los instrumentos económicos y costos ambientales para la prevención, conservación, recomposición y restauración del deterioro de los recursos naturales son decisivos en materia ambiental.
8. La auditoría ambiental y la valoración de los daños son instrumentos prioritarios para la gestión integral de las cuencas.
9. La existencia de un sistema de información ambiental, robusto, confiable, actualizado, verificable, accesible y seguro permite la acertada toma de decisiones.
10. La investigación y el conocimiento ambiental son instrumentos para el desarrollo sostenible.

#### **I.4.3.6.2. FINALIDAD**

La finalidad primordial de las estrategias y líneas de acción de esta decisión en materia ambiental se encuentra encaminada al mejoramiento continuo de la calidad de vida

Expediente No. 25000-23-27-000-2001-0479-01  
Acumulados Nos. 2000-0428, 2001-0122, 2001-0343  
Actor: GUSTAVO MOYA ÁNGEL Y OTROS  
Acción Popular

de los habitantes de la cuenca hidrográfica del río Bogotá a través de su sostenibilidad ambiental.

#### **I.4.3.5.2. OBJETIVOS**

##### **I.4.3.5.2.1. OBJETIVO GENERAL:**

Propender por la sostenibilidad ambiental de la cuenca hidrográfica del río Bogotá a través de su gestión integral, con medidas en materia de conservación, protección y recuperación del ambiente, mejoramiento de la calidad del agua, articulado con ordenación territorial y uso de suelo; e implementando instrumentos de auditoría y valoración del daño ambiental, además de procesos de investigación y generación de conocimiento en pro del desarrollo sostenible.

##### **I.4.3.5.2.2. Objetivos específicos:**

**Objetivo 1.** Conservar y proteger los procesos hidrológicos, ecosistemas y biodiversidad.

**Objetivo 2.** Mejorar la calidad del agua, mitigar y reducir la contaminación del recurso hídrico.

**Objetivo 3.** Propender por la implementación y mejora de las condiciones de saneamiento básico.

**Objetivo 4.** Implementar y actualizar los instrumentos de planeación y reglamentación de los usos del suelo.

**Objeto 5.** Fortalecer los instrumentos económicos.

Expediente No. 25000-23-27-000-2001-0479-01  
Acumulados Nos. 2000-0428, 2001-0122, 2001-0343  
Actor: GUSTAVO MOYA ÁNGEL Y OTROS  
Acción Popular

**Objetivo 6.** Definición e implementación de instrumentos de valoración del daño ambiental.

**Objetivo 7.** Definición e implementación de instrumentos de auditoría ambiental.

**Objetivo 8.** Generación de conocimiento científico - técnico a través de la investigación como fundamento de los procesos de planificación ambiental.

**Objetivo 9.** Implementación de un observatorio ambiental.

**Objetivo 10.** Implementación de un sistema de información ambiental para la cuenca hidrográfica del río Bogotá.

Las estrategias y líneas de acción que integran cada uno de los objetivos serán contextualizadas y desarrolladas por la Sala a continuación:

**Objetivo 1. Conservar y proteger los procesos hidrológicos, ecosistemas y biodiversidad**

Estrategia: La cuenca hidrográfica del río Bogotá es sobre todo riqueza de la Nación en cuanto a ecosistemas y biodiversidad se refiere; la sostenibilidad de la misma permite el desarrollo y mantenimiento de la cuenca vista ésta con un enfoque sistémico integral. Esta estrategia se encuentra orientada al conocimiento y entendimiento de cómo funcionan los procesos hidrológicos y la importancia de los ecosistemas y biodiversidad.

Expediente No. 25000-23-27-000-2001-0479-01  
 Acumulados Nos. 2000-0428, 2001-0122, 2001-0343  
 Actor: GUSTAVO MOYA ÁNGEL Y OTROS  
 Acción Popular

Las presiones naturales y antropogénicas son muy fuertes en la región, actividades tales como la agricultura y la ganadería así como el cambio climático hacen imperioso la adopción de medidas. La estrategia se dirige a la:

- Conservación y protección de las áreas de manejo.
- Conservación y protección de las zonas de especial importancia.
- Conservación y protección de ecosistemas.
- Conservación y protección de fauna y flora.
- Protección y manejo de humedales.
- Propender por el abastecimiento y disponibilidad de agua potable.

Para lo cual la Sala estima necesario, realizar las siguientes precisiones:

- **El ciclo hidrológico**

No se puede garantizar la conservación y protección material del derecho al agua (*descrita detalladamente en acápite anteriores*) y mucho menos hablar de mejoramiento ambiental como componente estratégico, si no se entiende el concepto de ciclo hidrológico.

La importancia de él radica en que es parte del modelo básico<sup>118</sup> para entender el "funcionamiento del sistema

---

<sup>118</sup>El ciclo hidrológico junto con el balance hídrico constituyen el modelo para entender el funcionamiento del sistema hídrico. Éste último "es una herramienta para el estudio de la variación espacial y temporal de los elementos constitutivos del ciclo hidrológico. Los balances hídricos permiten determinar la disponibilidad hídrica natural de las áreas en consideración y conocer el comportamiento de la oferta de agua, tanto superficial como subterránea a través del

Expediente No. 25000-23-27-000-2001-0479-01  
Acumulados Nos. 2000-0428, 2001-0122, 2001-0343  
Actor: GUSTAVO MOYA ÁNGEL Y OTROS  
Acción Popular

*hídrico atmosférico movido por la energía solar, **el cual es el enlace vital entre el océano y el continente**, mediante la circulación y transformación del agua a través de la atmósfera, la hidrósfera, la litósfera y la biósfera"*<sup>119</sup>.

Como se precisó, el agua es el principal constituyente de los seres vivos, además de ser un factor clave para la climatización del planeta en cuanto que permite la existencia de la humanidad, influyendo de manera determinante en las civilizaciones.

Los cambios en la distribución, circulación o temperatura de las aguas en la tierra pueden tener efectos nefastos. La actividad humana puede influir con sus labores constructivas y/o destructivas alterando el ciclo hidrológico.

La relevancia del ciclo del agua radica en que muestra la circulación - movimiento vertical y horizontal - continuo e ininterrumpido del agua en los estados sólido, líquido y gaseoso en la tierra.

El ciclo se puede definir como el proceso que describe el movimiento y la ubicación del agua en el planeta. Es el proceso continuo de circulación del agua, en sus diferentes estados, en la esfera terrestre. Los procesos involucrados son la precipitación, la evaporación, la transpiración, la infiltración y la escorrentía.

---

*estudio de los diferentes ciclos del agua". El Medio Ambiente en Colombia. Capítulo 4°. El Agua. Ideam 1998. Página 117.*

<sup>119</sup> El Medio Ambiente en Colombia. Capítulo 4°. El Agua. Ideam 1998. Página 116.

Expediente No. 25000-23-27-000-2001-0479-01  
Acumulados Nos. 2000-0428, 2001-0122, 2001-0343  
Actor: GUSTAVO MOYA ÁNGEL Y OTROS  
Acción Popular

El ciclo en forma sencilla se puede describir como: i) el agua se evapora desde los océanos y el continente para volverse parte de la atmósfera; ii) el vapor de agua se eleva y se transporta por la atmósfera en forma de nubes hasta que se condensa y cae sobre los océanos o la superficie en forma de precipitación; iii) el agua precipitada sobre el continente puede ser interceptada por las plantas y/o cualquier construcción, puede convertirse en agua superficial, infiltrarse en el suelo, correr a través del suelo en forma subsuperficial, descargar en los ríos como escorrentía; iv) la mayor parte del agua interceptada vuelve a evaporarse regresando a la atmósfera.

Sobre el tema, el Instituto de Hidrología, Meteorología y Estudios Ambientales (Ideam), entidad técnica especializada, describió el ciclo hidrológico de la siguiente manera<sup>120</sup>:

*"El agua se evapora desde el océano hacia la atmosfera en grandes proporciones (86%) y en menor grado desde el continente (14%), siendo el viento el agente transportador del vapor de agua a distancia hasta encontrar condiciones propicias para la condensación, reiniciándose un nuevo ciclo hidrológico.*

*Se estima que el volumen total del agua contenida en la hidrosfera es de 1.386 millones de km<sup>3</sup>. De este volumen, 96.5% se encuentran en los océanos como agua salada y el 3.5% restante, como agua dulce proveniente del continente. De éste último porcentaje el 69% se encuentra en forma sólida en los glaciares y el 30% como agua subterránea, quedando solamente el 1% que conforman los ríos y los cuerpos de agua.*

---

<sup>120</sup> Ibídem. Páginas 116 a 118.

Expediente No. 25000-23-27-000-2001-0479-01  
Acumulados Nos. 2000-0428, 2001-0122, 2001-0343  
Actor: GUSTAVO MOYA ÁNGEL Y OTROS  
Acción Popular

Al concluir un ciclo completo, retorna directamente al mar el 78% como precipitación y el 22% restante, precipitado en el continente, el 8% llega al mar.

El ciclo hidrológico está gobernado por procesos naturales que ocurren de manera continua. El agua cae sobre la superficie terrestre en forma líquida o sólida (nieve, granizo, etc.) parte de la cual puede ser evaporada nuevamente hacia la atmosfera, en tanto que la fracción restante cae hacia el suelo, donde puede infiltrarse o escurrir por las laderas, siguiendo la dirección de las mayores pendientes de terreno.

La fracción que se infiltra puede seguir tres rutas bien definidas: una parte es absorbida por las raíces de las plantas y llega a formar parte del tejido vegetal o bien, es liberada a través del proceso de transpiración hacia la atmosfera. Otra cantidad puede desplazarse paralelamente a la superficie a través de la zona no saturada del terreno como flujo subsuperficial hasta llegar a aflorar en los nacimientos o manantiales o continuar infiltrándose hasta alcanzar la zona saturada, donde recargará el almacenamiento de aguas subterráneas, de esta última, una parte alimenta el caudal de los cursos del agua (donde exista conexión hidráulica) como caudal de base.

La zona no saturada se caracteriza porque el agua se encuentra en los vacíos o poros conjuntamente con aire y está sometida a fuerza de capilaridad, mientras que a determinada profundidad el agua llena completamente los vacíos del suelo en la zona saturada, estando sometida a fuerzas gravitacionales y viscosas. Las aguas subterráneas, limitadas en la parte inferior por formaciones impermeables (arcilla, formaciones rocosas, etc.) no permanecen estáticas sino que se desplazan y forman el flujo subterráneo.

Cuando se presenta fracturas o fallamientos en la base de la formación impermeable, el agua subterránea desciende y representa una pérdida de humedad para la cuenca, llegando a formar parte del almacenamiento inactivo. En estas capas

Expediente No. 25000-23-27-000-2001-0479-01  
 Acumulados Nos. 2000-0428, 2001-0122, 2001-0343  
 Actor: GUSTAVO MOYA ÁNGEL Y OTROS  
 Acción Popular

*profundas, el tiempo de circulación o renovación es mucho más largo que en las capas acuíferas superficiales ubicadas en las zonas no saturada y saturada y, por lo tanto, no participan en el intercambio hídrico activo ni están vinculadas al régimen climático actual. Esa parte del ciclo hidrológico es de orden geológico (tiempo de renovación desde algunas décadas hasta miles de años).*

*La parte del agua que escurre a lo largo de las laderas puede ser interceptada (...) Estos tres flujos - superficial, subterráneo y subsuperficial - conforman la escorrentía que integra los cauces de las corrientes, alimenta los diferentes almacenamientos y drena finalmente hacia el mar.*

*Una fase fundamental es la evaporación, ya sea del agua contenida en los océanos, en la vegetación, de la proveniente de la superficie del terreno, de los cuerpos abiertos de agua, de las corrientes principales y secundarias o de las zonas no saturada y saturada del terreno, todo ello por acción de la radiación solar".*

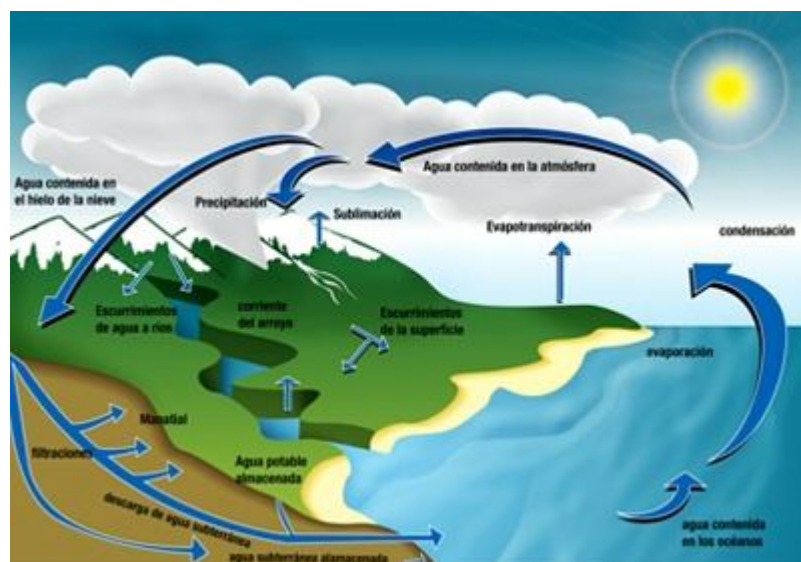

Ahora bien, el ciclo del agua se puede alterar y esto se debe principalmente a diferentes procesos, tales como la

Expediente No. 25000-23-27-000-2001-0479-01  
Acumulados Nos. 2000-0428, 2001-0122, 2001-0343  
Actor: GUSTAVO MOYA ÁNGEL Y OTROS  
Acción Popular

**construcción de presas:** se desvía el curso de los ríos, se cortan las fronteras naturales de los bosques, se reducen las precipitaciones, se afecta los procesos ecológicos; **efecto invernadero:** aumenta la temperatura de la superficie terrestre, modifica la circulación del agua y su curso en los ecosistemas; **deforestación:** tala masiva de plantas - árboles, impide que el agua se infiltre por la inexistencia de plantas, no llega el recurso a los acuíferos, se reduce la humedad en la atmósfera y con ello la posibilidad de precipitaciones en las zonas deforestadas afectando los ecosistemas; **explotación de acuíferos:** se produce impacto ambiental, se ponen en peligro los humedales y la biodiversidad existente en ellos; finalmente, podemos encontrar la **contaminación de las aguas** la cual para efectos de la presente decisión se analizará en los siguientes numerales.

- Los páramos, subpáramos, nacimientos de agua y zonas de recarga de acuíferos

Los ecosistemas de páramos cuentan con una relevante función socioeconómica en la región debido a que se han convertido en una importante fuente de abastecimiento de agua. Además de albergar especies únicas, permiten el almacenamiento y distribución de agua en los suelos; se trata nada más y nada menos que de un regulador hídrico por excelencia.

No obstante, dichas funciones están siendo amenazadas por la desmedida intervención humana. Las estructuras ecológicas están siendo utilizadas para el cultivo de papa, frijoles, plantación de especies foráneas como el

Expediente No. 25000-23-27-000-2001-0479-01  
Acumulados Nos. 2000-0428, 2001-0122, 2001-0343  
Actor: GUSTAVO MOYA ÁNGEL Y OTROS  
Acción Popular

pino, pastoreo de ganado, agricultura y minería, sin dejar de lado la amenaza por el cambio climático.

Ciertamente, la introducción de ganado en dichas zonas y los cultivos a gran escala hacen que se pierdan los suelos y la retención de agua, alterando el ya referido ciclo hidrológico. Por su parte, el cambio climático afecta la fauna y flora adaptadas a la humedad y temperatura características en los ecosistemas propios de la región Andina.

La reducción de la biodiversidad será cada vez mayor, las especies deben comenzar a adaptarse a las nuevas circunstancias, incluso, deberán desarrollarse y variar genéticamente para su subsistencia, en otros casos migraran a lugares más altos.

De acuerdo con nuestra legislación, los páramos no se encuentran dentro de las áreas protegidas de los sistemas de Parques Nacional.

Sobre el particular, estima la Sala que vale la pena recordar que la Constitución establece, entre otros, los siguientes deberes a cargo del Estado relacionados con el tema ambiental: Es obligación del Estado y de los particulares proteger las riquezas naturales de la nación (artículo 8°); proteger la diversidad e integridad del ambiente, conservar las áreas de especial importancia ecológica y fomentar la educación para lograr estos fines (artículo 79); las autoridades también deben garantizar la participación de la comunidad en las decisiones que puedan afectar el ambiente sano (art. 79); prevenir y

Expediente No. 25000-23-27-000-2001-0479-01  
 Acumulados Nos. 2000-0428, 2001-0122, 2001-0343  
 Actor: GUSTAVO MOYA ÁNGEL Y OTROS  
 Acción Popular

controlar los factores de deterioro ambiental, imponer las sanciones y exigir la reparación de los daños causados (artículo 80); planificar el manejo y aprovechamiento de los recursos naturales, para garantizar su desarrollo sostenible, conservación, restauración o sustitución (artículo 80); y proteger los recursos naturales del país y velar por la conservación del ambiente sano (artículo 95, numeral 8º), entre otros.

Muchas de las previsiones constitucionales antes referidas se desarrollaron a través de la Ley 99 de 1993, que dispuso particularmente en su artículo 1º los principios ambientales generales que deben guiar la gestión ambiental en el país, entre los cuales mencionó:

*"4. Las zonas de páramos, subpáramos, los nacimientos de agua y las zonas de recarga de acuíferos serán objeto de protección especial.*

*".....*

*"6. La formulación de las políticas ambientales tendrá en cuenta el resultado del proceso de investigación científica. No obstante, las autoridades ambientales y los particulares darán aplicación al principio de precaución conforme al cual, cuando exista peligro de daño grave e irreversible, la falta de certeza científica absoluta no deberá utilizarse como razón para postergar la adopción de medidas eficaces para impedir la degradación del medio ambiente".*

Por su parte, el artículo 16 de la Ley 373 de 1997<sup>121</sup>, modificado por el artículo 89 de la Ley 812 de 2003<sup>122</sup>, prescribió que:

---

<sup>121</sup> Por la cual se establece el programa para el uso eficiente y ahorro del agua.

Expediente No. 25000-23-27-000-2001-0479-01  
 Acumulados Nos. 2000-0428, 2001-0122, 2001-0343  
 Actor: GUSTAVO MOYA ÁNGEL Y OTROS  
 Acción Popular

"...las zonas de páramo, bosques de niebla y áreas de influencia de nacimientos acuíferos y de estrellas fluviales, deberán ser adquiridos o protegidos con carácter prioritario por las autoridades ambientales, entidades territoriales y entidades administrativas de la jurisdicción correspondiente..."

De otro lado, el Decreto 3600 de 2007<sup>123</sup> en su artículo 4º, estableció lo siguiente:

"Artículo 4º. Categorías de protección en suelo rural. Las categorías del suelo rural que se determinan en este artículo constituyen suelo de protección en los términos del artículo 35 de la Ley 388 de 1997 y son normas urbanísticas de carácter estructural de conformidad con lo establecido 15 de la misma ley: 1. Áreas de conservación y protección ambiental. Incluye las áreas que deben ser objeto de especial protección ambiental de acuerdo con la legislación vigente y las que hacen parte de la estructura ecológica principal, para lo cual en el componente rural del plan de ordenamiento se deben señalar las medidas para garantizar su conservación y protección. Dentro de esta categoría, se incluyen las establecidas por la legislación vigente, tales como:

1.1. Las áreas del sistema nacional de áreas protegidas.

1.2. Las áreas de reserva forestal.

1.3. Las áreas de manejo especial.

1.4. Las áreas de especial importancia ecosistémica, tales como páramos y subpáramos, nacimientos de agua, zonas de recarga de acuíferos, rondas hidráulicas de los cuerpos de

---

<sup>122</sup> Por la cual se aprueba el Plan Nacional de Desarrollo 2003-2006, hacia un Estado comunitario

<sup>123</sup> Por el cual se reglamentan las disposiciones de las Leyes 99 de 1993 y 388 de 1997 relativas a las determinantes de ordenamiento del suelo rural.

Expediente No. 25000-23-27-000-2001-0479-01  
Acumulados Nos. 2000-0428, 2001-0122, 2001-0343  
Actor: GUSTAVO MOYA ÁNGEL Y OTROS  
Acción Popular

*agua, humedales, pantanos, lagos, lagunas, ciénagas, manglares y reservas de flora y fauna".*

Sobre la protección de las zonas de recarga de acuíferos se encuentra el artículo 10 de la Ley 373 de 1997, que prescribe que para definir la viabilidad del otorgamiento de las concesiones de aguas subterráneas, las autoridades ambientales deben realizar, con el apoyo técnico y científico del Ideam y de Ingeominas, los estudios hidrogeológicos correspondientes y adelantar las acciones de protección de estas zonas.

Resulta importante señalar que cuando el ordenamiento jurídico colombiano se refirió a las áreas protegidas hizo referencia a las diferentes categorías de protección.

El Código de Recursos Naturales incluye bajo la denominación genérica "*áreas de manejo especial*" aquellas que se delimitan para la administración, manejo y protección del ambiente y de los recursos naturales renovables<sup>124</sup> y que para su creación se deben tener objetos determinados y fundarse en estudios ecológicos y económico-sociales<sup>125</sup>.

Dicho código utiliza la expresión área de manejo para referirse a cinco (5) posibilidades:

1. Área del Sistema de Parques Nacionales Naturales.
2. Distrito de Manejo Integrado.
3. Área de Recreación.

---

<sup>124</sup> Decreto 2811 de 1974. Artículo 308.

<sup>125</sup> Decreto 2811 de 1974. Artículo 308.

Expediente No. 25000-23-27-000-2001-0479-01  
Acumulados Nos. 2000-0428, 2001-0122, 2001-0343  
Actor: GUSTAVO MOYA ÁNGEL Y OTROS  
Acción Popular

4. Distrito de Conservación de Suelos.

5. Cuenca en Ordenación.

Cada una de ellas tiene elementos y características propias, con régimen jurídico particular y con nivel de protección diferente, siendo la primera, Sistema de Parques Nacionales Naturales como la más importante en cuanto a conservación y protección se refiere.

Entonces, resulta común encontrar confusión entre las áreas protegidas, verbigracia los páramos no son por sí mismos áreas protegidas, sino zonas de protección especial. Al no encontrarse enmarcados dentro de la categoría de áreas de manejo especial del Sistema de Parques Nacionales, le resta importancia como reservorio de fauna, flora, como corredor biológico y, claramente, fuente y regulador del recurso hídrico.

Se puede señalar sin dubitación alguna que de las áreas mencionadas tan sólo el Sistema de Parques Nacionales, y más abajo, los Distritos de Manejo Integrado, vienen siendo objeto de real protección; los demás han sido impactados y hoy día se encuentran en duda como verdaderos instrumentos de conservación y protección.

Ahora bien, el complejo de páramos de Cundinamarca está compuesto de la siguiente forma<sup>126</sup>:

---

<sup>126</sup> Fuente: Morales M., Otero J., Van der Hammen T., Torres A., Cadena C., Pedraza C., Rodríguez N., Franco C., Betancourth J.C., Olaya E., Posada E. y Cárdenas L. 2007. Atlas de páramos de Colombia. Instituto de Investigación de Recursos Biológicos Alexander von Humboldt. Bogotá, D. C.

Expediente No. 25000-23-27-000-2001-0479-01  
Acumulados Nos. 2000-0428, 2001-0122, 2001-0343  
Actor: GUSTAVO MOYA ÁNGEL Y OTROS  
Acción Popular

|                            |                         |            |
|----------------------------|-------------------------|------------|
| PÁRAMOS DE<br>CUNDINAMARCA | Guerrero                | 39.240 ha  |
|                            | Rabanal y Río<br>Bogotá | 16.356 ha  |
|                            | Chingaza                | 64.500 ha  |
|                            | Cruz Verde -<br>Sumpaz  | 266.250 ha |

En lo atinente a la importancia hidrológica en la región se tiene<sup>127</sup>:

|                      |                                                                                                                                                                                                                                                                                                                                                                   |
|----------------------|-------------------------------------------------------------------------------------------------------------------------------------------------------------------------------------------------------------------------------------------------------------------------------------------------------------------------------------------------------------------|
| Guerrero             | Abastece al río Bogotá                                                                                                                                                                                                                                                                                                                                            |
| Rabanal y Río Bogotá | Abastecimiento al embalse La Esmeralda de la Central Hidroeléctrica de Chivor y el embalse de Teatinos, que suministra agua al acueducto de la ciudad de Tunja, y el páramo del nacimiento del río Bogotá, con sus afluentes para el norte de la Capital. Se estima que las corrientes de agua que nacen en el complejo abastecen a más de 92 acueductos locales. |
| Chingaza             | Su transformación ha permitido el abastecimiento del 80% de agua para Bogotá.                                                                                                                                                                                                                                                                                     |
|                      | No solo por la multitud de lagunas naturales que                                                                                                                                                                                                                                                                                                                  |

<sup>127</sup> Ibídem.

Expediente No. 25000-23-27-000-2001-0479-01  
Acumulados Nos. 2000-0428, 2001-0122, 2001-0343  
Actor: GUSTAVO MOYA ÁNGEL Y OTROS  
Acción Popular

|                     |                                                                                                      |
|---------------------|------------------------------------------------------------------------------------------------------|
| Cruz Verde - Sumpaz | contiene, sino también por los embalses de Chisacá y la Regadera, que abastecen al Distrito Capital. |
|---------------------|------------------------------------------------------------------------------------------------------|

De manera particular y en relación con la situación de la cuenca hidrográfica, el Plan de Ordenación y Manejo - POMCA, precisó que dentro de la cuenca del río Bogotá se definieron cuatro tipos de áreas estratégicas por las características de sus ecosistemas, dichas áreas son:

**Ecosistemas declarados:** Son aquellos que se encuentran en una de las categorías del sistema de áreas protegidas.

**Ecosistemas a declarar:** Aquellos que por sus condiciones estructurales y su oferta de bienes y servicios ambientales deben pasar a la categoría de declarados.

**Ecosistemas a proteger:** como aquellos ecosistemas que requieren de un manejo especial al momento de darle uso, conservando siempre las características ecosistémicas, con el fin de preservar y proteger especies de Fauna y Flora en vía de extinción de áreas de superpáramo, páramo y bosque alto andino. El Pomca ilustró la situación de la siguiente forma:

| CUENCA  | AREAS PROTEGIDAS | AREAS A DECLARAR | AREAS A PROTEGER                                                                                                    | CONECTIVIDAD ENTRE CUENCAS |
|---------|------------------|------------------|---------------------------------------------------------------------------------------------------------------------|----------------------------|
| Tibitoc |                  |                  | Gachancipá y la Esmeralda en Tocancipá. Quebrada Honda en la Vereda San José Humedal los Patos y demás humedales en |                            |

Expediente No. 25000-23-27-000-2001-0479-01  
Acumulados Nos. 2000-0428, 2001-0122, 2001-0343  
Actor: GUSTAVO MOYA ÁNGEL Y OTROS  
Acción Popular

|                                       |                                           |                                                                                                                                  |                       |                                                                                             |
|---------------------------------------|-------------------------------------------|----------------------------------------------------------------------------------------------------------------------------------|-----------------------|---------------------------------------------------------------------------------------------|
|                                       |                                           |                                                                                                                                  | Tocancipá.            |                                                                                             |
| Rio Bogotá<br>(Sector Soacha-Salto)   | Sector Salto de Tequendama y Cerro Manjui | Humedales de Soacha y Ronda del rio Soacha, ecosistemas de conectividad con la cuenca del rio Soacha.                            | Ronda del rio Soacha. | Rio Apulo-Balsillas - Rio Bogotá Sector Salto Soacha - Rio Medio Bogotá sector Salto Apulo. |
|                                       | Parque Ronda del Rio Tunjuelo.            |                                                                                                                                  |                       | Rio Bogotá Sector Salto Soacha -Rio Tunjuelo.                                               |
| Rio Bogotá<br>(Sector Tibitoc-Soacha) | Cerros Orientales de Bogotá.              | Parque Entrenubes, Vereda Cerro de Hierbabuena, Páramo de Cruz Verde , Humedal artificial del Parque Navarra, Cerro la Conejera. | Quebrada La Santrosa. | Rio Bogotá Sector Tibitoc Soacha - Tuesacá y Tunjuelo.                                      |
|                                       | El Sapo - San Rafael (La Calera)          |                                                                                                                                  |                       | Rio Bogotá Sector Tibitoc-Teusaca.                                                          |
|                                       | Cerro de Torca                            |                                                                                                                                  |                       |                                                                                             |
|                                       | Cerros de Suba                            |                                                                                                                                  |                       |                                                                                             |
|                                       | Sierras del Chico                         |                                                                                                                                  |                       |                                                                                             |
|                                       | Humedal de Capellania o Cofradia          |                                                                                                                                  |                       | Eje ambiental de Bogotá.                                                                    |
|                                       | Humedal de Córdoba                        |                                                                                                                                  |                       | Eje ambiental de Bogotá.                                                                    |
|                                       | Humedal Jaboque                           |                                                                                                                                  |                       | Eje ambiental de Bogotá.                                                                    |
|                                       | Humedal dela Conejera.                    |                                                                                                                                  |                       | Eje ambiental de Bogotá.                                                                    |
|                                       | Humedal del Techo                         |                                                                                                                                  |                       | Eje ambiental de Bogotá.                                                                    |
|                                       | Humedal del Burro                         |                                                                                                                                  |                       | Eje ambiental de Bogotá.                                                                    |
|                                       | Humedal Juan Amarillo o Tibabuyes         |                                                                                                                                  |                       | Eje ambiental de Bogotá.                                                                    |
|                                       | Humedal Santa Maria del Lago.             |                                                                                                                                  |                       | Eje ambiental de Bogotá.                                                                    |
|                                       | Meandro de Say                            |                                                                                                                                  |                       |                                                                                             |
|                                       | Entre Nubes, Cuchila Guacamayas.          |                                                                                                                                  |                       | Rio Bogotá Sector Tibitoc, Soacha y Tunjuelo.                                               |
| Rio                                   | Cuchilas de Penas Blancas y de Subia.     | Laguna el Indio Ronda de la Microcuenca                                                                                          |                       | Calandaima - Rio Medio de Bogotá                                                            |

Expediente No. 25000-23-27-000-2001-0479-01  
Acumulados Nos. 2000-0428, 2001-0122, 2001-0343  
Actor: GUSTAVO MOYA ÁNGEL Y OTROS  
Acción Popular

|            |                                                  |                                                 |                                                                           |                                  |
|------------|--------------------------------------------------|-------------------------------------------------|---------------------------------------------------------------------------|----------------------------------|
| Calandaima |                                                  | de la Quebrada San Juan.                        |                                                                           | Sector Salto Apulo.              |
| Rio Chicú  | Cerro de Juaica                                  | Cerros de Manjuy y al nacimiento del rio Chicú. | Cerro de Lourdes en Municipio de Tabio y Humedales del Complejo de Chise. | Balsillas y Chicú.               |
| Rio Fria   | Nacimiento Quebrada Honda y Calderillas          |                                                 | Bosque dela vereda del Páramo de Guerrero.                                | Rio Frio y Rio Neusa.            |
|            | Pantano Redondo y Nacimiento del Rio Susagua     |                                                 |                                                                           | Rio Frio, Rio Negro y Rio Neusa. |
|            | Nacimiento del Rio Subachoque y Pantano de Arce. |                                                 |                                                                           | Rio Frio y Balsillas.            |

| CUENCA          | AREAS PROTEGIDAS                                 | AREAS A DECLARAR                                                                     | AREAS A PROTEGER                                                             | CONECTIVIDAD ENTRE CUENCAS                                           |
|-----------------|--------------------------------------------------|--------------------------------------------------------------------------------------|------------------------------------------------------------------------------|----------------------------------------------------------------------|
| Embalse de Muña | Corredor de restauración Microcuenca Paso Colora | Bosque Andino de las veredas Perico , Romeral , Alto de la Cabra, Hungría y el Peñol | Microcuenca de paso Colora y a las colas del Embalse del Muña.               |                                                                      |
|                 | Páramo Las Mercedes - Pasquilla                  |                                                                                      |                                                                              | Rio Tunjuelo - Embalse del Muña.                                     |
| Embalse Sisga   | Lagua de Guatavita y Loma de Penas Blancas.      | Embalse Sisga                                                                        | Bosque Alto Andino del Cerro La Leonera.                                     | Cerros Covadonga y Cerros de las tres viejas y el Rio San Francisco. |
| Embalse Tominé  | Cerro Pionono                                    | Cuchilla de Peña Negra, Cuenca del rio Aves                                          | Quebrada Corales, Cerro Laureles, Vereda Santa María, Cerro de las Mercedes. | Embalse de Tominé, Sisga, Tibitoc y Teusacá.                         |
|                 | Laguna de Guatativa y Loma de las Penas Blancas. |                                                                                      |                                                                              | Sisga-Tominé                                                         |
| Rio Alto Bogotá | Nacimiento Quebrada El Choque                    | Bosque de contorno de la Quebrada las Quinchas.                                      | Cuchilla Peñalisa y al Bosque de la parte alta de la vereda Nemoconcito.     |                                                                      |

Expediente No. 25000-23-27-000-2001-0479-01  
Acumulados Nos. 2000-0428, 2001-0122, 2001-0343  
Actor: GUSTAVO MOYA ÁNGEL Y OTROS  
Acción Popular

|                                 |                                                          |                                                       |                                                                                                                         |                                                                                                                   |
|---------------------------------|----------------------------------------------------------|-------------------------------------------------------|-------------------------------------------------------------------------------------------------------------------------|-------------------------------------------------------------------------------------------------------------------|
|                                 | Nacimiento<br>Rio Bogotá<br>(Villapinzón)                |                                                       |                                                                                                                         |                                                                                                                   |
| Rio Apulo                       | Laguna Pedro<br>Palo                                     | Humedales de<br>Laguna Verde<br>(Zipacón)             | Sector de la<br>Palma, Peña<br>Negra<br>Cachipay,<br>Laguna Verde,<br>Ronda de los<br>ríos Apulo,<br>Curi y<br>Bajamón. | Rio Apulo -<br>Rio Bogotá<br>Sector Salto<br>Apulo.                                                               |
|                                 | Sector del<br>Salto del<br>Tequedama y<br>Cerro Manjui.  |                                                       |                                                                                                                         | Rio Apulo,<br>Balsillas-<br>Rio Bogotá<br>Sector Salto<br>Soacha- Rio<br>Medio Bogotá<br>Sector Salto<br>Apulo.   |
| Rio<br>Balsillas                | Quebradas<br>Paramillos y<br>Queseros                    | Bosque Alto<br>andino de la<br>Vereda Canica<br>Alta. | Piedras del<br>Tunjo                                                                                                    |                                                                                                                   |
|                                 | Cerro de<br>Juaica                                       | Laguna de<br>Juncal                                   | Piedras de<br>Chivo Negro                                                                                               | Balsillas y<br>Chicú.                                                                                             |
|                                 | Nacimiento del<br>Rio Subachoque<br>y Pantano de<br>Arce |                                                       | Laguna del<br>Salitre.                                                                                                  | Rio Frio y<br>Balsillas.                                                                                          |
|                                 | Páramo de<br>Guerrero,<br>Guargua y<br>laguna Verde.     |                                                       |                                                                                                                         | Rio<br>Balsillas ,<br>Rio Frio y<br>Rio Neusa.                                                                    |
|                                 | Sector del<br>Salto del<br>Tequendama y<br>Cerro Majui   |                                                       |                                                                                                                         | Rio Apulo -<br>Balsillas-<br>Rio Bogotá<br>Sector Salto<br>Soacha - Rio<br>Medio Bogotá<br>Sector Salto<br>Apulo. |
| Rio Bogotá<br>(Sector<br>Sisga) | Cerro Pionono                                            |                                                       | Quebrada<br>Quindingua o<br>del Roble en                                                                                | Tominé -<br>Sisga -<br>Tibitoc y<br>Teusaca.                                                                      |

En este contexto, para la Sala resulta imperiosa la adopción de medidas que garanticen la protección y conservación de dichas zonas, que por su importancia hídrica y ecosistémica deben tener un papel preponderante en la gestión integral de la cuenca hidrográfica. En el caso de autos, lo anterior se vislumbra con claridad cuando se hace referencia a la importancia hídrica del

Expediente No. 25000-23-27-000-2001-0479-01  
 Acumulados Nos. 2000-0428, 2001-0122, 2001-0343  
 Actor: GUSTAVO MOYA ÁNGEL Y OTROS  
 Acción Popular

corredor ambiental de la zona oriental de la ciudad, tal y como se verá a continuación.

- **Importancia hídrica del corredor ambiental de la zona oriental de la ciudad**

Los cerros orientales además de constituirse en un conector ecológico regional, también conforman un andén biográfico. Se trata nada más y nada menos que de un eje fundamental en la estructura ecológica de Bogotá por cuanto facilita la conexión entre el oriente y occidente (Río Bogotá), Norte y Sur (Sumapaz). Los cerros en su conjunto son uno de los principales productores de bienes y servicios ambientales, esto es, suministra agua potable, sirve de regulador acuífero de la Sabana, ayuda en la conservación de la biodiversidad, contribuye al mejoramiento paisajístico de la región y suple las deficiencias en la oferta recreativa y educativa de la capital.

Concretamente, en materia hídrica los cerros cumplen una función preponderante a saber<sup>128</sup>:

**"IMPORTANCIA HÍDRICA**

*Los Cerros Orientales cuentan con una gran importancia de orden hídrico e hidrológico, ya que posee varias microcuencas que abastecen al Río Bogotá y es una zona importante en donde se presenta recarga de acuíferos y condensación de lluvias.*

*En esta área existe un ecosistema llamado Bosque Andino, siendo preciso mencionar que estas zonas,*

---

<sup>128</sup> Personería de Bogotá. Los cerros Orientales: Desafío Institucional. 2007.

Expediente No. 25000-23-27-000-2001-0479-01  
Acumulados Nos. 2000-0428, 2001-0122, 2001-0343  
Actor: GUSTAVO MOYA ÁNGEL Y OTROS  
Acción Popular

igual que en el páramo y subpáramo, realizan captura de agua. Especies como el musgo son auténticas "esponjas" que guardan gran cantidad, permitiendo que las microcuencas existentes allí posean un caudal adecuado, esta humedad además permite que muchas otras especies puedan empezar su proceso de germinación y repoblación en forma espontánea (sucesión natural), y que estas, a su vez, permitan que los niveles de luz, temperatura y humedad varíen permitiendo que otras especies "lleguen" a la zona y así se vaya creando una cadena evolutiva que con el tiempo permite no sólo el crecimiento de bosques, el garantizar un flujo continuo de agua hacia las microcuencas, la recarga de acuíferos y de allí abasteciendo al Río Bogotá, además favorece que exista un ambiente (hábitat) conveniente para que muchas especies animales crezcan, se desarrollen y reproduzcan en un ecosistema adecuado.

Desde otro punto de vista, en los Cerros orientales existen zonas de captación de aguas para uso humano, riego de cultivos, abrevaderos de ganado, etc., de tal forma que el agua, no es sólo un recurso natural, sino un insumo de vital importancia para la seguridad alimentaria y el modus vivendi de los habitantes de los cerros y en general de Bogotá, la región y del país, ya que el Río Bogotá desemboca en el Río Magdalena siendo esta la más importante corriente de agua de Colombia.

El complejo montañoso de la Cordillera Oriental de Colombia, que incluye los Cerros Orientales del Distrito, lleva sus aguas a la república de Venezuela a través del Río Blanco; de forma que desde esa óptica cualquier desequilibrio en el sistema que conforma el corredor ecológico que intercomunica al Parque Nacional Natural Chingaza con el Páramo de Sumapaz, es decir cualquier alteración en los Cerros Orientales, tiene relevancia en el ámbito nacional e inclusive internacional.

Los Cerros Orientales por su localización y conformación, son corredor y conector ecológico regional que une ecosistemas de montaña y

Expediente No. 25000-23-27-000-2001-0479-01  
Acumulados Nos. 2000-0428, 2001-0122, 2001-0343  
Actor: GUSTAVO MOYA ÁNGEL Y OTROS  
Acción Popular

*planicie, intercomunican los macizos de Chingaza y Sumapaz.*

*El Bosque Oriental del Distrito concentra una biodiversidad que proviene de biomas regionales vecinos, de la cual depende su estabilidad hídrica y ecológica, Orinoquía (por el Boquerón de Chipaque), los páramos de Sumapaz y Chingaza por el sur y el nororiente".*

Así pues, la Sala en el marco de esta estrategia considera que se deben proteger las fuentes y nacimientos de agua en los cerros orientales como importante estructura abastecedora de servicios ambientales para la región, en especial, para el Distrito Capital.

Sobre el particular, vale la pena recordar que esta Corporación en sentencia de 5 de noviembre de 2013, Exp.: 2005 - 00662, Actor: Sonia Andrea Ramírez, profirió providencia en cuanto a la protección de la reserva protectora "Bosque Oriental de Bogotá" y en la cual se decidió lo siguiente:

**1. CONFÍRMASE** el numeral 1º de la sentencia proferida el 29 de septiembre de 2006 por el Tribunal Administrativo de Cundinamarca, Sección Segunda, Subsección "B", en cuanto declaró responsable de la violación de derechos colectivos al Ministerio de Ambiente, Vivienda y Desarrollo Territorial, a la Corporación Autónoma Regional de Cundinamarca - CAR y al Distrito Capital.

**2. MODIFÍCASE** en todo lo demás la sentencia proferida el 29 de septiembre de 2006 por el Tribunal Administrativo de Cundinamarca, Sección Segunda, Subsección "B", la cual quedará así:

**1. AMPÁRANSE** los siguientes derechos colectivos que, de acuerdo con lo dispuesto en la parte motiva de la sentencia, fueron vulnerados por parte del Ministerio de Ambiente, Vivienda y Desarrollo Territorial, la Corporación Autónoma Regional de Cundinamarca - CAR y el Distrito Capital de Bogotá:

Expediente No. 25000-23-27-000-2001-0479-01  
Acumulados Nos. 2000-0428, 2001-0122, 2001-0343  
Actor: GUSTAVO MOYA ÁNGEL Y OTROS  
Acción Popular

i) El goce de un ambiente sano;

ii) La existencia del equilibrio ecológico y el manejo y aprovechamiento racional de los recursos naturales para garantizar su desarrollo sostenible, su conservación, restauración o sustitución. La conservación de las especies animales y vegetales, la protección de áreas de especial importancia ecológica, de los ecosistemas situados en las zonas fronterizas, así como los demás intereses de la comunidad relacionados con la preservación y restauración del medio ambiente;

iii) La realización de construcciones, edificaciones y desarrollos urbanos respetando las disposiciones jurídicas, de manera ordenada, y dando prevalencia al beneficio de la calidad de vida de los habitantes; y

iv) La seguridad y prevención de desastres previsibles técnicamente.

**2. ORDÉNASE conjuntamente al Ministerio de Ambiente, a la CAR y al Distrito Capital de Bogotá, respetando el ámbito material y funcional de sus respectivas competencias que ha sido definido en las normas jurídicas vigentes:**

**2.1.** Elaborar, ejecutar y financiar solidariamente, dentro del término de un (1) año, contado a partir de la ejecutoria de esta sentencia, un "Plan de manejo del área de canteras, vegetación natural, pastos, plantaciones de bosques y agricultura, de la franja de adecuación", en el área de "canteras", "vegetación natural", "pastos", "plantaciones de bosque", "agricultura", ubicada en la franja de adecuación, y que corresponde al área de ocupación pública prioritaria, con el objeto de proyectar una gran zona de aprovechamiento ecológico para los habitantes de la ciudad, de modo que compense los perjuicios ambientales sufridos por los habitantes de la ciudad y asegure los derechos a la recreación, el deporte y el aprovechamiento del tiempo libre, previstos en el artículo 52 de la Constitución Política.

Expediente No. 25000-23-27-000-2001-0479-01  
 Acumulados Nos. 2000-0428, 2001-0122, 2001-0343  
 Actor: GUSTAVO MOYA ÁNGEL Y OTROS  
 Acción Popular

Esta zona de aprovechamiento ecológico deberá entrar en funcionamiento con todos los elementos recreativos que resulten de este plan, a más tardar dentro de los 24 meses siguientes a la ejecutoria de este fallo.

**2.2.** Respetar los derechos adquiridos, en la forma como ha quedado definido en la parte considerativa, a quienes obtuvieron licencias de construcción y/o construyeron legalmente en la franja de adecuación y en la "zona de recuperación ambiental", ubicada dentro de la reserva forestal protectora, antes de la anotación registral de la afectación a la reserva del predio respectivo.

No obstante lo anterior, no se reconocerán los derechos adquiridos si se demuestra que, a pesar de no existir una anotación registral dentro de la historia traditicia del inmueble que lo afectara a la reserva forestal protectora, por actuaciones se deduzca inequívocamente que el propietario, poseedor o tenedor del inmueble conocía la afectación que pesaba sobre el inmueble en cuanto a la existencia de la reserva.

Igualmente, se advierte que lo dicho no excluye la posibilidad de que puedan negociarse directamente o, en su lugar, expropiarse predios ubicados dentro de la zona de reserva forestal protectora - no en la franja de adecuación -, que revistan especial importancia ecológica que amerite que su propiedad sea Estatal.

**2.3.** No conceder nuevas licencias, autorizaciones o permisos que permitan el desarrollo urbanístico o de construcción en la reserva forestal protectora; y observar estrictamente lo dispuesto en la Ley 1450 de 2011<sup>129</sup> y los Decretos 2372<sup>130</sup> y 2820<sup>131</sup>, ambos de 2010, o aquellas normas que los

<sup>129</sup> Por la cual se reglamenta el Título VIII de la Ley 99 de 1993 sobre licencias ambientales.

<sup>130</sup> Por el cual se reglamenta el Decreto Ley 2811 de 1974, la Ley 99 de 1993, la Ley 165 de 1994 y el Decreto Ley 216 de 2003, en relación con el Sistema Nacional de Áreas Protegidas, las categorías de manejo que lo conforman y se dictan otras disposiciones.

<sup>131</sup> Por el cual se reglamenta el Título VIII de la Ley 99 de 1993 sobre licencias ambientales.

Expediente No. 25000-23-27-000-2001-0479-01  
 Acumulados Nos. 2000-0428, 2001-0122, 2001-0343  
 Actor: GUSTAVO MOYA ÁNGEL Y OTROS  
 Acción Popular

modifiquen o aclaren, respecto de los usos permitidos en el área forestal protectora; así como lo dispuesto en los artículos 34 de la Ley 685 de 2001 y 204 de la Ley 1450 de 2011, que prohíben tajantemente desarrollar actividades mineras en dichas áreas.

Bajo ninguna circunstancia podrán adelantarse actividades mineras en la reserva forestal protectora, a partir del presente fallo.

**2.4.** Elaborar, ejecutar y financiar solidariamente, dentro del marco de sus competencias, un Plan que permita preservar, conservar y recuperar los recursos hídricos y la biodiversidad existente en la reserva forestal protectora "Bosque Oriental de Bogotá.

### **3. ORDÉNASE al Ministerio de Ambiente:**

**3.1.** Señalar, dentro de los seis (6) meses siguientes a la ejecutoria de esta providencia, las actividades que ocasionan bajo impacto ambiental y que además generan beneficio social, de manera tal que se pueden desarrollar en las áreas de reserva forestal, sin necesidad de efectuar la sustracción de las mismas, en cumplimiento de lo dispuesto en el parágrafo 2º del artículo 204 de la Ley 1450 de 2011<sup>132</sup>.

**3.2.** Fijar, dentro de los seis (6) meses siguientes a la ejecutoria de esta providencia, las tasas compensatorias, estableciendo tarifas diferenciales, según el estrato socioeconómico a que pertenece el predio respectivo ubicado en la Zona de Recuperación Ambiental. Estas tasas estarán destinadas a compensar los gastos de mantenimiento de la renovabilidad de los recursos naturales renovables, con base en los métodos y sistemas que para la determinación de los costos y beneficios fijó el legislador en el artículo 42 de la Ley 99 de 1993, en cumplimiento del mandato constitucional consignado en el artículo 338 de la Constitución Política.

### **4. ORDÉNASE al Distrito Capital de Bogotá:**

**4.1.** Elaborar, dentro del término de seis (6) meses, contado a partir de la ejecutoria de esta sentencia, un

---

<sup>132</sup> Por la cual se expide el Plan Nacional de Desarrollo, 2010-2014.

Expediente No. 25000-23-27-000-2001-0479-01  
Acumulados Nos. 2000-0428, 2001-0122, 2001-0343  
Actor: GUSTAVO MOYA ÁNGEL Y OTROS  
Acción Popular

"Plan de reubicación de asentamientos humanos", cuyo objeto será la reubicación de los asentamientos que amenacen ruina, se encuentren ubicados en la franja de adecuación y en la reserva forestal protectora y comporten riesgo no mitigable.

Este Plan deberá definir (i) las áreas que comportan riesgo no mitigable; (ii) los asentamientos humanos que pueden verse afectados; (iii) las medidas que se pueden adoptar para la reubicación; y (iv) el cronograma de actividades que se deberá seguir para el efecto.

**4.2.** El Alcalde Distrital deberá presentar ante el Concejo Distrital un proyecto de reforma al Plan de Ordenamiento Territorial, dentro de los seis (6) meses siguientes a la ejecutoria de esta sentencia, de tal manera que la reglamentación de los usos del suelo tanto en la franja de adecuación, como en el área de la reserva forestal protectora denominada "Bosque Oriental de Bogotá", esté conforme con lo dispuesto en este fallo.

**4.3.** Proceder, de forma inmediata, al trámite de normalización de las urbanizaciones que definitivamente queden excluidas del área de reserva, a fin de garantizar que su población pueda acceder a una infraestructura de servicios públicos que garantice la salubridad pública.

**5. ORDÉNASE a la CAR** modificar, dentro de los seis (6) meses siguientes a la ejecutoria de esta providencia, el Plan de Manejo Ambiental de la reserva forestal protectora "Bosque Oriental de Bogotá" comprendido en la Resolución 1141 de 2006, de conformidad con lo dispuesto en esta sentencia.

**6. ORDÉNASE a los propietarios, poseedores y tenedores de predios ubicados en la Reserva Forestal Protectora "Bosque Oriental de Bogotá" y en la franja de adecuación** i) abstenerse de realizar conductas que perjudiquen el área protegida, ii) acatar cabalmente la normativa ambiental y iii) velar por la integridad de la reserva, informando oportunamente a la autoridad policial acerca de cualquier conato de asentamiento o acto que atente contra ella.

Expediente No. 25000-23-27-000-2001-0479-01  
Acumulados Nos. 2000-0428, 2001-0122, 2001-0343  
Actor: GUSTAVO MOYA ÁNGEL Y OTROS  
Acción Popular

**7. ORDÉNASE a los Curadores Urbanos de Bogotá D.C.**, observar en forma estricta la normatividad ambiental; abstenerse de conceder nuevas licencias, autorizaciones o permisos que faciliten el desarrollo urbanístico o de construcción en el área de la reserva forestal protectora; y abstenerse de incurrir en las acciones u omisiones que llevaron a la violación de derechos colectivos, so pena de hacerse acreedores de las sanciones legales.

**8. ORDÉNASE a la Superintendencia de Notariado y Registro** tomar todas las medidas necesarias para asegurar que los predios ubicados, tanto en la franja de adecuación como en la reserva forestal protectora, cuenten con una dependencia exclusiva en dicha entidad, que atienda todo lo relativo a los folios de matrícula inmobiliaria de los predios ubicados en estas zonas.

**9. LEVÁNTASE LA SUSPENSIÓN PROVISIONAL** decretada por el Tribunal Administrativo de Cundinamarca mediante autos de 1º de junio de y 29 de noviembre de 2005, respecto del artículo 1º de la Resolución 463 de 2005 (14 de abril) y de la totalidad de la Resolución 1582 de 2005 (26 de octubre).

**10. ORDÉNASE a la Policía Nacional** prestar apoyo a las autoridades ambientales, al Distrito y a la comunidad, en la defensa y protección del medio ambiente y de los recursos naturales renovables del área ubicada en la Reserva Forestal Protectora Bosque Oriental de Bogotá, de conformidad con lo dispuesto en el artículo 101 de la Ley 99 de 1993.

**11. CONFÓRMASE** un Comité de Verificación, que hará seguimiento a lo ordenado en este fallo y estará integrado por el Procurador General de la Nación o su delegado; el Ministro del Medio Ambiente o su delegado; el Alcalde Mayor de Bogotá o su delegado; el Director de la Corporación Autónoma Regional de Cundinamarca - CAR o su delegado; el Comandante de la Policía Metropolitana de Bogotá o su delegado; el Personero Distrital de Bogotá o su delegado, el Contralor Distrital de Bogotá o su delegado, el

Expediente No. 25000-23-27-000-2001-0479-01  
Acumulados Nos. 2000-0428, 2001-0122, 2001-0343  
Actor: GUSTAVO MOYA ÁNGEL Y OTROS  
Acción Popular

Gerente de la Empresa de Acueducto y Alcantarillado de Bogotá o su delegado, el Superintendente de Notariado y Registro o su delegado; la ONG Cerros Orientales de Bogotá y la señora Sonia Andrea Ramírez Lamy.

El *a quo* deberá celebrar audiencias públicas de verificación y evaluación de lo ordenado en este fallo, mínimo una vez al año, con los miembros del Comité, a fin de garantizar el cabal cumplimiento del mismo.

**12. COMPÚLSENSE** copias de la presente decisión y de las piezas procesales correspondientes, a la Contraloría Distrital de Bogotá, a la Fiscalía General de la Nación y a la Procuraduría General de la Nación.

**13. NIÉGASE** por improcedente el reconocimiento del incentivo económico a favor de la actora.

**14. NIÉGANSE** las demás pretensiones de la demanda; y las solicitudes de nulidad y desacato contra la CAR presentadas, respectivamente, por Efraín Forero Molina y Constructora Palo Alto y Cia. S. en C..

**15. ORDÉNASE conjuntamente al Ministerio de Ambiente, a la CAR y al Distrito Capital de Bogotá,** publicar la parte resolutive de esta sentencia en forma visible en un diario de amplia circulación nacional, dentro de los 10 días siguientes a la ejecutoria de la misma.

**16.** En firme esta providencia, devuélvase el expediente al Tribunal de origen.

- **Importancia ecosistémica y patrimonial del Salto del Tequendama**

El Salto del Tequendama es una cascada natural, ubicada aproximadamente a 30 km al suroeste de Bogotá, el cual se nutre de las aguas del Río Bogotá que, después de hacer un recorrido por la Sabana de Bogotá, cae desde una altura de 157 metros sobre un abismo rocoso de forma

Expediente No. 25000-23-27-000-2001-0479-01  
Acumulados Nos. 2000-0428, 2001-0122, 2001-0343  
Actor: GUSTAVO MOYA ÁNGEL Y OTROS  
Acción Popular

circular. Se halla en una región boscosa de neblina permanente.

El Salto del Tequendama, además de ofrecer un paisaje extraordinario por su imponentia, el lugar tiene una importancia de tradición histórica y cultural para Colombia toda vez que la cultura Muisca, habitantes históricos de la zona, le otorga un origen mítico.

El naturalista **Alexander Freiherr von Humboldt**, nacido en Berlín en 1769; en su expedición por América del Sur en 1799, describió la importancia que tiene como paisaje el Salto de Tequendama:

*"El Salto de Tequendama debe su aspecto imponente a la relación de su altura y de la masa de agua que se precipita. El río Bogotá, después de haber regado el pantano de Funza, cubierto de bellas plantas acuáticas, se angosta y vuelve a su lecho cerca de Canoas. Allí tiene todavía 45 metros de ancho. El gran muro de roca, cuyas paredes baña la cascada y que por su blancura y la regularidad de sus capas horizontales recuerda el calcáreo jurásico; los reflejos de la luz que se rompe en la nube de vapor que flota sin cesar por encima de la catarata; la división al infinito de esta masa vaporosa que vuelve a caer en perlas húmedas y deja detrás de sí algo como una cola de corneta; el ruido de la cascada parecido al rugir del trueno y repetido por los ecos de las montañas; la oscuridad del abismo; el contraste entre los robles que arriba recuerdan la vegetación de Europa y las plantas tropicales que crecen al pie de la cascada, todo se reúne para dar a esta escena indescriptible un carácter individual y grandioso. Solamente cuando el río Bogotá está crecido, es cuando se precipita perpendicularmente y de un solo salto, sin ser detenido por las asperezas de la roca. Al contrario, cuando las aguas están bajas, y así es como las he visto, el espectáculo es más animado.*

Expediente No. 25000-23-27-000-2001-0479-01  
Acumulados Nos. 2000-0428, 2001-0122, 2001-0343  
Actor: GUSTAVO MOYA ÁNGEL Y OTROS  
Acción Popular

*Sobre la roca existen dos salientes: la una a 10 metros y la otra a 60 metros; éstas producen una sucesión de cascadas, debajo de las cuales todo se pierde en un mar de espuma y de vapor."*

El Salto de Tequendama, hace consideración a un lugar de gran valor histórico, cultural y biológico. Constituye un referente fundamental en el desarrollo de la Nación, fue parte del escudo nacional, portadilla del papel periódico ilustrado y sirvió de inspiración a muchos viajeros, poetas y artistas que le brindaron un homenaje a través de su obra.

El ecosistema que rodea a la catarata es un gran productor de agua, captador de carbono y garantiza un eficiente sistema de equilibrio hídrico; debido a esta importancia es objeto de muchos movimientos que buscan recuperar la zona como el patrimonio ambiental, histórico y cultural que representa para Colombia.

No obstante su importancia ecológica e histórica, por la contaminación del río Bogotá y la ausencia del caudal en la Cascada, en razón a la utilización de éste en la producción de energía eléctrica, el Salto dejó de ser un sitio turístico y el ecosistema circundante ha sufrido un deterioro notorio.

La misma afectación ha sufrido La casa del Salto de Tequendama, una construcción aristocrática de estilo francés, que fuera construida en el año 1923, se caracterizó por mucho tiempo por ser uno de los más grandes centros turísticos colombianos, se cree obra del arquitecto Carlos Arturo Tapias.

Expediente No. 25000-23-27-000-2001-0479-01  
Acumulados Nos. 2000-0428, 2001-0122, 2001-0343  
Actor: GUSTAVO MOYA ÁNGEL Y OTROS  
Acción Popular

Se utilizó por primera vez como estación terminal del ferrocarril del sur, que tenía una parada en el Salto del Tequendama, a la que ingresaba solo la clase élite capitalina.

La casa fue un sitio muy concurrido y debido a esto se decidió que la construcción se convirtiera en un hotel, donde fue visitado por personalidades de todo el país; sin embargo, producto de la contaminación del Río Bogotá, los turistas perdieron su interés en él, llevándolo al abandono y permaneciendo así por varias décadas.

Actualmente se ha venido trabajando en la recuperación ambiental y cultural de esta edificación, se busca contrastar la arquitectura con la sostenibilidad ambiental y el arte, con el objetivo de convertirla en un lugar de exposición de estudios científicos y culturales; además de generar conciencia del impacto de las acciones de los ciudadanos, que afectan de una manera significativa el medio ambiente, el entorno y la sostenibilidad.

Mediante el Acuerdo 043 de 1999 expedido por la Corporación Autónoma Regional de Cundinamarca -CAR-, en virtud de las facultades legales otorgadas, especialmente aquellas consagradas en el Decreto Reglamentario 1974 de 1989, se declaró Distrito de Manejo Integrado de los recursos naturales renovables al sector del Salto del Tequendama - Cerro Manjui, alinderando a su vez una zona de cerca de 10.422 hectáreas.

Expediente No. 25000-23-27-000-2001-0479-01  
Acumulados Nos. 2000-0428, 2001-0122, 2001-0343  
Actor: GUSTAVO MOYA ÁNGEL Y OTROS  
Acción Popular

Dicha declaratoria enmarca su importancia en la necesidad de propender por la protección del medio ambiente y el desarrollo sostenible de las áreas en cuestión, poniendo de presente la premura de desarrollar políticas para el ordenamiento del Distrito de Manejo Integrado, en especial por la relevancia del salto *per sé*, en vista que esta caída de agua natural y su ecosistema circundante comportan un captador de carbono que garantiza el sistema de equilibrio hídrico y ambiental de la zona.

El acuerdo impone la necesidad de la declaración de las zonas que dentro del DMI, deban ser consideradas Zona de Preservación, de Producción, de Recuperación para la preservación o de Recuperación para Producción, siendo el objetivo de estas categorías, la delimitación de las áreas específicas para el efectivo ejercicio de las acciones, encaminadas a garantizar la prolongación de los recursos, a la creación de bienes y servicios a partir del aprovechamiento razonado de los mismos, y al restablecimiento de las condiciones de la zona que permitan el desarrollo sostenible de ésta.

Es por ello que resulta imperioso esbozar la riqueza natural del Salto del Tequendama - Cerro Manjui, que es uno de los patrimonios ambientales más importantes de la región, no solo porque surte de agua a siete municipios en Cundinamarca sino por la gran diversidad de plantas y flores, compuesta por 52 familias y 81 especies entre las que se destacan las orquídeas (*Epidendrum Secundum*); el Roble (*Quercus humboldtii*), especie forestal nativa y dominante que se encuentra en vía de extinción por la sobre explotación; la *Syphocampilus Hispydus*, especie

Expediente No. 25000-23-27-000-2001-0479-01  
Acumulados Nos. 2000-0428, 2001-0122, 2001-0343  
Actor: GUSTAVO MOYA ÁNGEL Y OTROS  
Acción Popular

endémica que únicamente crece en Cundinamarca; la *Meliosma Bogotensis* que solo se encuentra en la sabana de Bogotá y la *Merinthopidium Vogelii*, ilustrada en la Expedición Botánica de José Celestino Mutis, entre otras. Aunado a lo anterior, este corredor ambiental es el hogar de más de 120 especies entre las que se encuentra el emblemático Oso de Antejos (*Tremarctos ornatus*), única especie viviente de su género; el Oso Perezoso (*Melursus ursinus*), gran variedad de reptiles e insectos en su mayoría únicos en la región.

La conservación de las especies animales y vegetales, la protección de las áreas de especial importancia ecológica y la preservación y restauración del medio ambiente es imperativa y debe entenderse como una de las estrategias claves para la recuperación integral del Río Bogotá.

- **Uso racional y adecuado del agua**

Como elemento integrante y preponderante para conservación y protección de los procesos hidrológicos, ecosistemas y biodiversidad se encuentra el relacionado con el uso eficiente y ahorro del agua. Sobre el tema, la Sala recuerda la Ley 373 de 1997, a través de la cual se busca conservar y proteger el recurso hídrico, la misma se refiere a los diferentes programas dirigidos a la utilización de aguas superficiales, lluvias y subterráneas.

En efecto, el artículo 1º dispone que todo plan ambiental regional y municipal debe incorporar obligatoriamente un programa para el uso eficiente y ahorro del agua. Se

Expediente No. 25000-23-27-000-2001-0479-01  
Acumulados Nos. 2000-0428, 2001-0122, 2001-0343  
Actor: GUSTAVO MOYA ÁNGEL Y OTROS  
Acción Popular

entiende por programa para el uso eficiente y ahorro de agua el conjunto de proyectos y acciones que deben elaborar y adoptar las entidades encargadas de la prestación de los servicios de acueducto, alcantarillado, riego y drenaje, producción hidroeléctrica y demás usuarios del recurso hídrico.

Las Corporaciones Autónomas Regionales y demás autoridades ambientales encargadas del manejo, protección y control del recurso hídrico aprobarán la implantación y ejecución de dichos programas en coordinación con otras corporaciones autónomas que compartan las fuentes que abastecen los diferentes usos.

El programa de uso eficiente y ahorro de agua deberá estar basado en el diagnóstico de la oferta hídrica de las fuentes de abastecimiento y la demanda de agua, y contener las metas anuales de reducción de pérdidas, las campañas educativas a la comunidad, la utilización de aguas superficiales, lluvias y subterráneas, los incentivos y otros aspectos que se definan.

En particular y lo atinente al reuso del agua, dispone que las aguas utilizadas, sean éstas de origen superficial, subterráneo o lluvias, en cualquier actividad que genere afluentes líquidos, deberán ser reutilizadas en actividades primarias y secundarias cuando el proceso técnico y económico así lo amerite y aconseje según el análisis socio-económico y las normas de calidad ambiental.

Expediente No. 25000-23-27-000-2001-0479-01  
Acumulados Nos. 2000-0428, 2001-0122, 2001-0343  
Actor: GUSTAVO MOYA ÁNGEL Y OTROS  
Acción Popular

En este sentido, la Sala estima que los programas y medidas de uso adecuado y racional del recurso se convierten en eje fundamental y articulador para la sostenibilidad del recurso no sólo para las generaciones presentes sino futuras, incluso, para sustentabilidad del planeta.

- **Explotación de recursos naturales - minería**

Al igual que con la disposición de residuos sólidos el tema relacionado con la explotación de los recursos naturales cobra especial relevancia en la cuenca hidrográfica del Río Bogotá. Sobre el tema, la Sala destaca el artículo 61 de la Ley 99 de 1993, el cual declaró los sistemas montañosos como de interés ecológico nacional, dispuso expresamente que la destinación prioritaria de la Sabana de Bogotá será para el desarrollo de actividades agropecuarias y forestales, además facultó al Ministerio para determinar las zonas en las cuales exista compatibilidad con las explotaciones mineras, y dispuso que la Corporación Autónoma Regional de Cundinamarca -CAR- otorgará o negará las correspondientes licencias ambientales y que los municipios y el Distrito Capital son quienes expiden la reglamentación de los usos del suelo de la Sabana de Bogotá, a partir de las disposiciones de la Ley 99 de 1993.

En desarrollo de este mandato el Ministerio de Ambiente expidió la Resolución 222 de agosto 3 de 1994, por la cual se determinan zonas compatibles para las explotaciones mineras de materiales de construcción en la

Expediente No. 25000-23-27-000-2001-0479-01  
Acumulados Nos. 2000-0428, 2001-0122, 2001-0343  
Actor: GUSTAVO MOYA ÁNGEL Y OTROS  
Acción Popular

Sabana de Bogotá, que señaló las zonas compatibles con el ejercicio de la actividad minera, determinando que lo serían las áreas comprendidas dentro de las coordenadas por ella determinadas; que posteriormente, mediante la Resolución 813 de 2004 se ampliaron, desmesuradamente, las coordenadas que delimitan las zonas compatibles con la minería de materiales de construcción y las zonas compatibles con la minería de arcillas en la Sabana de Bogotá.

Por su parte, el actual Código de Minas, en sus artículos 34 y 35 establece respectivamente las áreas del territorio colombiano excluibles a la minería, las cuales corresponden a las zonas del Sistema de Parques Nacionales Naturales, Parques de Carácter Regional y Reservas Forestales.

Complementariamente, el artículo 37 determina que con excepción de las áreas definidas en los artículos 34 y 35, *"ninguna autoridad regional, seccional o local, podrá establecer zonas del territorio que queden permanente o transitoriamente excluidas de la minería. Esta prohibición comprende a los planes de ordenamiento territorial..."*.

En el año 2002, el Decreto 1728 del Ministerio de Ambiente, Vivienda y Desarrollo Territorial, sobre licencias ambientales, en su artículo 11, parágrafo 4º, estableció la necesidad de compatibilizar en el marco del Estudio de Impacto Ambiental, el proyecto, obra o actividad con los usos del suelo definidos en el respectivo Plan de Ordenamiento Territorial, Esquema o

Expediente No. 25000-23-27-000-2001-0479-01  
Acumulados Nos. 2000-0428, 2001-0122, 2001-0343  
Actor: GUSTAVO MOYA ÁNGEL Y OTROS  
Acción Popular

Plan Básico del área en donde se desarrollarán los mismos.

Por su parte, el Ministerio de Ambiente, Vivienda y Desarrollo Territorial y las CARs con jurisdicción en la Sabana, disponen de la información ambiental referente a los parques naturales nacionales y regionales y a las zonas de reserva forestal. Adicionalmente, dicho Ministerio contrató con la firma PRODEA un estudio que, además de proponer unas zonas favorables para la minería, plantea varias conclusiones y recomendaciones.

Ahora bien, es indispensable mejorar el conocimiento geológico y ambiental a través de investigaciones integrales que permitan obtener criterios válidos para ordenar la actividad minera en la Sabana de Bogotá. Sólo mediante este tipo de estudios, que permitan conocer la realidad geológica, físico-biótica, social y económica relacionada con la actividad minera, se podrán establecer y priorizar zonas que, tanto geológica como ambientalmente presenten una capacidad de acogida adecuada para adelantar la actividad minera.

Es importante que en el Marco de la Agenda Conjunta las autoridades minera y ambiental trabajen permanentemente siguiendo el principio de coordinación institucional, buscando siempre, mediante una gestión integral y concertada, soluciones técnicas y ambientales adecuadas a la problemática relacionada con el aprovechamiento de los materiales de construcción en la Sabana de Bogotá.

Expediente No. 25000-23-27-000-2001-0479-01  
Acumulados Nos. 2000-0428, 2001-0122, 2001-0343  
Actor: GUSTAVO MOYA ÁNGEL Y OTROS  
Acción Popular

Igualmente, las dos autoridades deben trabajar articuladamente para que las disposiciones sobre el tema sean difundidas y socializadas entre los actores interesados, como mecanismo para garantizar su cumplimiento.

Resulta fundamental expedir las disposiciones que regulen las zonas en las cuales se permita la actividad minera, se revisen los títulos mineros y los planes de mejoramiento ambiental, verificar su cumplimiento y de no cumplirse, adelantar las actuaciones administrativas e imponer los correctivos correspondientes, papel preponderante de la autoridad ambiental.

Como de una parte la autoridad ambiental expide las licencias y define las áreas permitidas para la explotación minera y, de otra, el Ministerio de Minas otorga las concesiones para su explotación, es indispensable que las dos autoridades, previo consenso, expidan la correspondiente regulación. Como hasta la fecha esta resolución no ha sido expedida, la ausencia de regulación, es razón suficiente para confirmar la sentencia en este aspecto.

En estos términos habrá que tener en cuenta el estudio base contratado con el IDEAM con el objeto de proponer un ordenamiento ambiental regional del sector minero, a partir de la zonificación de la compatibilidad ambiental de la Sabana con la minería explotada en ella, más aún

Expediente No. 25000-23-27-000-2001-0479-01  
Acumulados Nos. 2000-0428, 2001-0122, 2001-0343  
Actor: GUSTAVO MOYA ÁNGEL Y OTROS  
Acción Popular

cuando la Resolución 1197 fue declarada parcialmente nula por el Consejo de Estado en sentencia 30987 de 2010<sup>133</sup>.

La nueva reglamentación del artículo 61 como lo advierte el propio Ministerio en sus alegatos de conclusión, debe orientarse a la ejecución del estudio técnico base, contrato interadministrativo No. 172 de 2009 IDEAM-895 de 2009 MAVDT, que debió redefinir las zonas ambientalmente compatibles con la minería en la Sabana de Bogotá, cuya formulación y ajustes se efectuó entre diciembre de 2010 y abril de 2011, para lo cual se requiere además del concepto previo del Ministerio de Minas y Energía, de conformidad con lo previsto en la Ley 1382 de 2010, concepto que fue emitido desde el 16 de diciembre de 2011, objeto de análisis para presentar la propuesta normativa, la cual deberá expedirse en un término perentorio de seis (6) meses.

Se requiere en desarrollo de los principios de precaución y desarrollo sostenible hacer una verificación de los grupos ilegales y de hecho de la minería para adoptar los correctivos a que haya lugar.

Resulta de fundamental importancia para la Sala tener en cuenta el concepto de los pasivos ambientales mineros - PAM, de poca difusión en nuestro país a pesar de su significado y necesidad de desarrollo.

Para el efecto se consideran los modelos que al respecto ha estudiado la División de Recursos e Infraestructura de

---

<sup>133</sup> Consejo de Estado. Sala de lo Contencioso Administrativo. Sección Tercera. Magistrada Ponente: Dra. Ruth Stella Correa Palacio.

**Expediente No. 25000-23-27-000-2001-0479-01**  
**Acumulados Nos. 2000-0428, 2001-0122, 2001-0343**  
**Actor: GUSTAVO MOYA ÁNGEL Y OTROS**  
**Acción Popular**

Santiago de Chile (2008), en los cuales se destacan los conceptos de responsabilidad y retroactividad, puntos neurálgicos para saber cómo y qué se financia en materia de remediación de Pasivos Ambientales Mineros.

El Pasivo Ambiental Minero -PAM, hace referencia al impacto ambiental generado por la actividad minera abandonada con o sin dueño u operador definido o identificable y siempre y cuando no se haya producido un cierre reglamentado y certificado por la autoridad correspondiente.

De acuerdo con los modelos Chileno y Peruano, el Pasivo Ambiental Minero sólo adquiere relevancia en cuanto constituye un riesgo significativo o permanente y potencial para la vida o salud de las personas o para el medio ambiente.

Los PAM pueden presentar riesgos sobre la salud y el medio ambiente derivados de la presencia de sustancias tóxicas, como arsénico, cianuro o metales pesados producto de los residuos mineros en los cuerpos de agua tanto superficiales como subterráneas y el derivado de la seguridad por la estabilidad física de las instalaciones remanentes en el suelo y el aire.

Partiendo del criterio según el cual la existencia de un PAM da lugar a la obligación de remediar por cuanto según el principio de quien contamina paga, debe determinarse a quién corresponde asumir la responsabilidad del pago, hasta dónde y hasta cuándo.

Expediente No. 25000-23-27-000-2001-0479-01  
Acumulados Nos. 2000-0428, 2001-0122, 2001-0343  
Actor: GUSTAVO MOYA ÁNGEL Y OTROS  
Acción Popular

Un primer aspecto a tener en cuenta entonces es la definición por la responsabilidad del daño producido y por el riesgo de daños futuros. La herramienta jurídica para comprender el daño ambiental está en la responsabilidad civil por daños ambientales contractual y extracontractual.

Según los modelos revisados la responsabilidad extracontractual en Chile es subjetiva, que exige por lo tanto la prueba del dolo o la culpa para determinar la responsabilidad para reparar o indemnizar. Significa entonces que la responsabilidad se edifica no sólo sobre el hecho dañoso y el nexo causal entre éste y la actividad generadora del daño sino además el elemento subjetivo con que se actuó.

En estos términos se estima que si no existen leyes protectoras (no se actúa contra legem) y el actor cuenta con autorización administrativa, se elimina la existencia de culpa.

Para eliminar este obstáculo las legislaciones han optado por invertir la carga de la prueba en beneficio de las víctimas del daño ambiental, evento en el cual basta que el damnificado demuestre el daño y el nexo causal y el responsable demuestre que actuó sin culpa.

Los países como Estados Unidos y Alemania han adoptado por el contrario el modelo de la responsabilidad objetiva, esto es, sin consideración al elemento subjetivo.

Expediente No. 25000-23-27-000-2001-0479-01  
Acumulados Nos. 2000-0428, 2001-0122, 2001-0343  
Actor: GUSTAVO MOYA ÁNGEL Y OTROS  
Acción Popular

Considera la Sala que en Colombia lo que existe es ausencia de aplicación de los contenidos normativos previstos en la Ley 1333 de 2009 que consagra las infracciones que dan lugar a declarar la responsabilidad por concepto del pasivo ambiental.

Adicionalmente, definida la responsabilidad es preciso establecer los alcances de la indemnización, hasta dónde hay que indemnizar, debiendo tener claro que en la mayoría de los casos no es posible volver las cosas a su estado anterior frente al impacto por la explotación minera, luego lo que se pretende es la disminución del riesgo a niveles aceptables para el medio ambiente, la salud y la vida humana. Si no es viable remediar la situación debe ordenarse el pago de una suma de dinero.

La Gerencia Estratégica de Cuenca deberá contar con la información detallada de la gestión de los pasivos ambientales mineros y solicitar a las autoridades competentes para promover las acciones judiciales a que haya lugar para efecto de obtener las indemnizaciones correspondientes, acorde con lo establecido en la Ley 1333 de 2009, por la cual se establece el procedimiento sancionatorio ambiental.

- **Adquisición de ecosistemas estratégicos para su protección, incentivos y esquemas de pagos por servicios ambientales - PSA**

Otra de las estrategias que integran este primer objetivo, no pueden ser sino las referidas a la adquisición de ecosistemas o zonas estratégicas para su protección, así como los incentivos y pagos por servicios

Expediente No. 25000-23-27-000-2001-0479-01  
Acumulados Nos. 2000-0428, 2001-0122, 2001-0343  
Actor: GUSTAVO MOYA ÁNGEL Y OTROS  
Acción Popular

ambientales, éste último como instrumento económico de primer orden en la conservación y protección de ecosistemas.

La Ley 99 de 1993 en su artículo 108 ordenó a las Corporaciones Autónomas Regionales que con el apoyo de las entidades territoriales, adelanten planes de cofinanciación para adquirir áreas o ecosistemas estratégicos para la conservación, preservación y recuperación de sus recursos naturales.

La definición e identificación de estas áreas y los procesos de adquisición, conservación y administración deben hacerse con la activa participación de la sociedad civil.

En concordancia, se encuentra el artículo 111 *ejusdem*, disposición modificada por el artículo 210 de la Ley 1450 de 2011, el cual declara áreas de interés público las áreas de importancia estratégica para la conservación de recursos hídricos que surten de agua los acueductos municipales, distritales y regionales.

Los departamentos y municipios dedicarán un porcentaje no inferior al 1% de sus ingresos corrientes para la adquisición y mantenimiento de dichas zonas o para financiar esquemas de pago por servicios ambientales.

Los recursos de que trata dicho artículo, deben destinarse prioritariamente a la adquisición y mantenimiento de las zonas en comento.

Expediente No. 25000-23-27-000-2001-0479-01  
Acumulados Nos. 2000-0428, 2001-0122, 2001-0343  
Actor: GUSTAVO MOYA ÁNGEL Y OTROS  
Acción Popular

Asimismo, las autoridades ambientales definirán las áreas prioritarias a ser adquiridas con estos recursos o el lugar donde se deben implementar los esquemas por pagos de servicios ambientales de acuerdo con la reglamentación que el Ministerio de Ambiente y Desarrollo Sostenible expida para el efecto. Su administración corresponderá al respectivo distrito o municipio. Los municipios, distritos y departamentos deben garantizar la inclusión de los recursos dentro de sus planes de desarrollo y presupuestos anuales respectivos, individualizándose la partida destinada para tal fin.

El Ministerio de Ambiente, los Institutos de Investigación Científica adscritos y vinculados, las Corporaciones Autónomas Regionales y de Desarrollo Sostenible, las Autoridades Ambientales de los Grandes Centros Urbanos y los establecimientos ambientales a que se refiere el artículo 13 de la Ley 768 de 2002, podrán en el marco de sus competencias, efectuar los aportes técnicos, financieros y operativos requeridos para la consolidación del instrumento de pago por servicios ambientales y el desarrollo de proyectos derivados de este instrumento.

En coherencia con lo anterior, el artículo 107 de la mencionada Ley 99 declara de utilidad pública e interés social la adquisición de bienes de propiedad privada o la imposición de servidumbres, que sean necesarias para la ejecución de obras públicas destinadas a la protección y manejo del medio ambiente y los recursos naturales renovables; la declaración y alindamiento de áreas que

Expediente No. 25000-23-27-000-2001-0479-01  
Acumulados Nos. 2000-0428, 2001-0122, 2001-0343  
Actor: GUSTAVO MOYA ÁNGEL Y OTROS  
Acción Popular

integren el Sistema de Parques Nacionales Naturales, y la ordenación de cuencas hidrográficas.

Por su parte, el artículo 16 de la Ley 373 de 1997 dispone que en la elaboración y presentación del programa de uso eficiente y ahorro de agua se debe precisar que las zonas de páramo, bosques de niebla y áreas de influencia de nacimientos acuíferos y de estrellas fluviales, deberán ser adquiridos o protegidos con carácter prioritario por las autoridades ambientales, entidades territoriales y entidades administrativas de la jurisdicción correspondiente, las cuales realizarán los estudios necesarios para establecer su verdadera capacidad de oferta de bienes y servicios ambientales, para iniciar un proceso de recuperación, protección y conservación.

De otro lado y frente a los incentivos y esquemas de pagos por servicios ambientales, la Sala recuerda que se trata de dos instrumentos dirigidos a la conservación y uso *"sostenible de los recursos naturales existentes en un determinado sitio geográfico con el propósito de evitar, en el tiempo, la disminución o pérdida de las diversas funciones ecosistémicas cuya oferta le genera a las comunidades humanas beneficios tanto directos (suministro de bienes tangibles: madera, alimentos, medicinas) como indirectos (provisión de servicios intangibles: regulación del agua, control de la erosión)"*<sup>134</sup>.

---

<sup>134</sup> Guía metodológica para el diseño e implementación del incentivo económico de pago por servicios ambientales - psa. Ministerio de Ambiente y Desarrollo Sostenible. 2012.

Expediente No. 25000-23-27-000-2001-0479-01  
 Acumulados Nos. 2000-0428, 2001-0122, 2001-0343  
 Actor: GUSTAVO MOYA ÁNGEL Y OTROS  
 Acción Popular

En cuanto a lo que se entiende por incentivo y esquemas de pago por servicios ambientales, la Guía Metodológica de PSA<sup>135</sup>, señaló:

*"Incentivos*

*Desde un contexto general, los incentivos a la conservación son señales (ej: económicas, tributarias) que algún sujeto o grupo social envía a determinados actores para inducirlos, específicamente, a que realicen cambios voluntarios en sus habituales patrones de decisión asociados al uso o manejo de los recursos naturales renovables y la biodiversidad.*

*Estas señales emitidas de un actor a otro, son reconocimientos monetarios o no monetarios que en términos prácticos tienen como objetivo evitar el deterioro o la pérdida de ecosistemas naturales (bosques, humedales, páramos); fomentar su restauración fundamentalmente en áreas estratégicas para la generación de servicios ambientales; y mitigar los efectos sociales negativos (bienestar) causados por la progresiva disminución que sufre la oferta ambiental disponible, en un determinado espacio geográfico, cuando se desarrollan actividades productivas o mantienen hábitos de consumo insostenibles (esto quiere decir, en términos económicos, que la demanda va aumentando cada vez más con respecto a la oferta total disponible). Ministerio de Ambiente y Desarrollo Sostenible Oficina de Negocios Verdes y Sostenibles República de Colombia*

*Esquemas de Pago por Servicios Ambientales - PSA*

*Los esquemas de Pago por Servicios Ambientales - PSA, son una clase de incentivo económico cuyo mecanismo gira en torno a un típico mercado (oferta Vs. demanda) en el cual los propietarios y poseedores regulares de predios, donde se encuentran ubicados los ecosistemas naturales que suministran este tipo de servicios, reciben*

---

<sup>135</sup> Ibídem.

Expediente No. 25000-23-27-000-2001-0479-01  
Acumulados Nos. 2000-0428, 2001-0122, 2001-0343  
Actor: GUSTAVO MOYA ÁNGEL Y OTROS  
Acción Popular

*voluntariamente y en forma periódica un reconocimiento (dinero, especie, mixto) por parte de algunos usuarios finales en razón al beneficio individual o colectivo que les causa contar con su permanente provisión.*

*Este reconocimiento, sirve para que esos propietarios y poseedores "valoren" la importancia social que tiene conservar o restaurar los ecosistemas naturales, y por tanto mantener o incrementar la disponibilidad (oferta) de los servicios ambientales que proporcionan, lo cual se hace evidente solo cuando esta nueva concepción se logre internalizar en sus correspondientes funciones de utilidad individual, y como resultado, adopten otras actividades o prácticas de manejo dirigidas a sostener e incluso incrementar no solo su cantidad sino también su calidad".*

Es de resaltar que las zonas de importancia ambiental proporcionan valiosos servicios que no son valorados ni protegidos por la sociedad en general a pesar de tener evidentes beneficios. El Bosque alto andino, verbigracia, es un importante regulador hídrico y de control de sedimentos, dicha estructura ecosistémica no es estimada hasta que se presentan eventos como inundaciones, avalanchas o, incluso, reducción y/o pérdida de cantidad de agua que abastece acueductos municipales, distritales y regionales. Lo anterior se convierte en la razón de ser de estos instrumentos económicos, a partir de los cuales se busca fortalecer los valores culturales y de reconocimiento social asociados a la conservación de los recursos hídricos y de la biodiversidad.

Sobre el particular, el Ministerio de Ambiente y Desarrollo Sostenible expidió recientemente el Decreto 953 de 2013, reglamentario de la Ley 1450 de 2011.

Expediente No. 25000-23-27-000-2001-0479-01  
Acumulados Nos. 2000-0428, 2001-0122, 2001-0343  
Actor: GUSTAVO MOYA ÁNGEL Y OTROS  
Acción Popular

El objeto de la norma es promover la conservación y recuperación de las áreas de importancia estratégica para la conservación de recursos hídricos que surten de agua a los acueductos municipales, distritales y regionales, mediante la adquisición y mantenimiento de dichas áreas y la financiación de los esquemas de pago por servicios ambientales y el cual se aplicará a las entidades territoriales, a los distritos de riego que no requieren licencia ambiental y a las autoridades ambientales.

Dispone el decreto que para efectos de la adquisición de predios o la implementación de esquemas de pago por servicios ambientales por parte de las entidades territoriales, las autoridades ambientales deberán previamente identificar, delimitar y priorizar las áreas de importancia estratégica, con base en la información contenida en los planes de ordenación y manejo de cuencas hidrográficas, planes de manejo ambiental de microcuencas, planes de manejo ambiental de acuíferos o en otros instrumentos de planificación ambiental relacionados con el recurso hídrico.

En ausencia de los instrumentos de planificación de que trata el presente artículo o cuando en estos no se hayan identificado, delimitado y priorizado las áreas de importancia estratégica, la entidad territorial deberá solicitar a la autoridad ambiental competente que identifique, delimite y priorice dichas áreas.

Según se observa, para la selección de los predios se deberán evaluar los siguientes criterios, sin perjuicio de otros adicionales que podrá definir mediante acto

Expediente No. 25000-23-27-000-2001-0479-01  
Acumulados Nos. 2000-0428, 2001-0122, 2001-0343  
Actor: GUSTAVO MOYA ÁNGEL Y OTROS  
Acción Popular

administrativo el Ministerio de Ambiente y Desarrollo Sostenible:

1. Población abastecida por los acueductos beneficiados con la conservación del área estratégica dentro de la cual está ubicado el predio.
2. Presencia en el predio de corrientes hídricas, manantiales, afloramientos y humedales.
3. Importancia del predio en la recarga de acuíferos o suministro hídrico.
4. Proporción de coberturas y ecosistemas naturales poco o nada intervenidos presentes en el predio.
5. Grado de amenaza de los ecosistemas naturales por presión antrópica.
6. Fragilidad de los ecosistemas naturales existentes.
7. Conectividad ecosistémica.
8. Incidencia del predio en la calidad del agua que reciben los acueductos beneficiados.

En cuanto a los esquemas de pagos por servicios ambientales, la Sala encuentra que para su implementación se deben considerar como mínimo los siguientes elementos:

1. Selección de los predios objeto del incentivo. Una vez seleccionados los predios con base en los criterios establecidos en el artículo 5°, las entidades territoriales deberán tener en cuenta las siguientes directrices:
  - a. Se priorizará la aplicación del incentivo a la conservación de las coberturas vegetales naturales;

Expediente No. 25000-23-27-000-2001-0479-01  
Acumulados Nos. 2000-0428, 2001-0122, 2001-0343  
Actor: GUSTAVO MOYA ÁNGEL Y OTROS  
Acción Popular

- b. Se privilegiarán los predios de propietarios y poseedores regulares de menores ingresos;
- c. Se otorgará el incentivo de pago por servicios ambientales hasta para un máximo de cincuenta (50) hectáreas. Se podrá otorgar el incentivo a áreas adicionales, siempre y cuando se dé cumplimiento a lo establecido en el literal anterior y que no sea viable su compra;
- d. Se priorizarán los predios que a partir de su uso actual y en ausencia del esquema de pago por servicios ambientales, presenten un mayor riesgo futuro de deterioro;
- e. Para el reconocimiento del incentivo en el caso de recuperación y restauración de predios, se exigirá acreditar que los predios seleccionados no estuvieron cubiertos de ecosistemas naturales en los últimos cinco (5) años.

2. Valor del incentivo a reconocer. Para la determinación del valor único del incentivo a reconocer en cada área de importancia estratégica, en dinero o en especie, la entidad territorial tendrá en cuenta los siguientes elementos:

- a. El costo de oportunidad, que servirá como punto de referencia, se calculará para las actividades productivas más representativas en las áreas de importancia estratégica, para lo cual se utilizará alguna de las siguientes opciones:

Expediente No. 25000-23-27-000-2001-0479-01  
Acumulados Nos. 2000-0428, 2001-0122, 2001-0343  
Actor: GUSTAVO MOYA ÁNGEL Y OTROS  
Acción Popular

El equivalente a los beneficios económicos netos que se generan por el uso del suelo en las actividades productivas antes señaladas, o el valor de la renta de la tierra, para las actividades productivas indicadas;

- b. Para la determinación del máximo valor anual del incentivo a reconocer por hectárea, se seleccionará el menor costo de oportunidad promedio del área de importancia estratégica, calculado a partir de alguna de las opciones anteriormente mencionadas. Este valor no podrá superar el 15% del avalúo comercial promedio por hectárea en conservación de los predios ubicados en el área de importancia estratégica.
- c. El valor máximo del incentivo a reconocer anualmente por hectárea será el siguiente: hasta el 100% del valor del incentivo para áreas menores o iguales a 50 hectáreas. Para las siguientes 50 hectáreas se aplica hasta el 75% del valor del incentivo, y para áreas que superen las 100 hectáreas se aplica hasta el 50% del valor del incentivo.

Finalmente, para la Sala resulta de suma importancia anotar que existe obligatoriedad en la destinación de dichos recursos. Ciertamente, el artículo 12 *ibídem*, dispone que dado que los ingresos corrientes a los que se refiere el artículo 111 de la Ley 99 de 1993, modificado por el artículo 210 de la Ley 1450 de 2011, corresponden al presupuesto de los municipios, distritos y

Expediente No. 25000-23-27-000-2001-0479-01  
Acumulados Nos. 2000-0428, 2001-0122, 2001-0343  
Actor: GUSTAVO MOYA ÁNGEL Y OTROS  
Acción Popular

departamentos, estas entidades garantizarán la inclusión de dichos recursos dentro de sus planes de desarrollo y presupuestos anuales respectivos, individualizándose la partida destinada para tal fin.

En este contexto, estos instrumentos son trascendentales en la gestión integral de la cuenca, concretamente, en la protección y conservación del ciclo hidrológico y de los ecosistemas y la biodiversidad.

- Caudal ecológico y ambiental

Finalmente, la Sala encuentra que lo atinente al caudal ecológico y ambiental, sin lugar a dudas resulta de vital importancia para la vida no solo del río en sí mismo considerado, sino también del ecosistema y la biodiversidad.

El establecimiento de un régimen ambiental de caudal es, en la actualidad, una herramienta prácticamente imprescindible en la gestión de las cuencas hidrográficas. El número de infraestructuras hidráulicas construidas ha sufrido un enorme incremento en las últimas décadas como respuesta a la demanda creciente de recurso hídrico originada por el desarrollo agrícola, industrial y urbano<sup>136</sup>.

Debido a las alteraciones que se presentan en los ríos cuando su régimen de caudal es controlado o alterado, han surgido los conceptos de caudal ecológico y caudal

---

<sup>136</sup> MAGDALENO, Fernando. Caudales Ecológicos. Conceptos básicos, métodos de cálculo y nuevas interpretaciones. Ingeniería civil No 135. 2007.

Expediente No. 25000-23-27-000-2001-0479-01  
 Acumulados Nos. 2000-0428, 2001-0122, 2001-0343  
 Actor: GUSTAVO MOYA ÁNGEL Y OTROS  
 Acción Popular

ambiental<sup>137</sup>. Históricamente este tipo de caudales tienen su origen en EE.UU., donde se les denomina "*instreamflow*"<sup>138</sup>. Éste término, al principio se utilizaba para definir el caudal que era necesario para mantener las condiciones adecuadas, en un río, que requerían algunas especies acuáticas indicadoras (como los peces para pesca deportiva) con algún valor para su conservación, maduración o cría y paso<sup>139</sup>.

Paralelamente, este concepto se ha venido utilizando para definir los componentes del ecosistema fluvial completo el cual incluye el nacimiento del mismo; el cauce en su totalidad; las zonas ripariás; el agua del cauce y su naturaleza física y química; el agua subterránea asociada al cauce y los humedales ligados al agua superficial o subsuperficial; la llanura de inundación; el estuario y el ecosistema marino litoral, cuando éste depende claramente de las entradas de agua dulce.

En la literatura se encuentra una amplia y extensa gama de definiciones y denominaciones propuestas por diferentes autores o normas, tal y como se observa a continuación<sup>140</sup>:

---

<sup>137</sup> Universidad Nacional de Colombia (Grupo GIREH), Ministerio de Ambiente, Vivienda y Desarrollo Territorial (Grupo OEI), convenio 004/2007. 2008. Metodología para la estimación del caudal ambiental en proyectos licenciados.

<sup>138</sup> LAMB, B.L. Criteria for evaluating state instream-flow programs: deciding what works. Journal of Water Resources Planning and Management. Páginas 121 y 270. 1995.

<sup>139</sup> BUSTAMANTE Toro, C. Monsalve Durango, E. GarciaReinoso, P. 2007.Revista de Investigaciones No. 17. Universidad del Quindío. Páginas 205-221.

<sup>140</sup> CARVAJAL Escobar, Yesid. El régimen de caudal ambiental en el marco de la gestión integrada del recurso hídrico para adaptarse al cambio climático. Universidad del Valle. 2007.

Expediente No. 25000-23-27-000-2001-0479-01  
Acumulados Nos. 2000-0428, 2001-0122, 2001-0343  
Actor: GUSTAVO MOYA ÁNGEL Y OTROS  
Acción Popular

| DENOMINACIÓN            | CONCEPTO                                                                                                                                                                                                                                                                                                                                                                                                                                                       | REFERENCIA                                        |
|-------------------------|----------------------------------------------------------------------------------------------------------------------------------------------------------------------------------------------------------------------------------------------------------------------------------------------------------------------------------------------------------------------------------------------------------------------------------------------------------------|---------------------------------------------------|
| Caudal Ecológico Mínimo | Es el caudal que restringe el uso durante las estaciones de caudales bajos y mantienen la vida en el río. No aporta una solución ecológica. Se calcula de forma directa y arbitraria, producto de un pacto más que de una formulación científica                                                                                                                                                                                                               | King et al.<br><br>(1999);<br>Palau<br><br>(2003) |
| Caudal Ecológico        | Caudal mínimo necesario en una fuente o curso fluvial, para<br><br>preservar la conservación de los ecosistemas fluviales actuales, en<br><br>atención a los usos de agua comprometidos, a los requerimientos físicos de la corriente fluvial, para mantener su estabilidad y cumplir sus funciones tales como, dilución de contaminantes, conducción<br><br>De sólidos, recarga de acuíferos y mantenimientos de las características paisajísticas del medio. | Ormazabal<br><br>(2004)                           |
| Caudal de Mantenimiento | Caudal requerido para mantener todas las funciones ecosistémicas del río, incluyendo la incorporación continua y balanceada de las especies acuáticas y riparias. Es un caudal                                                                                                                                                                                                                                                                                 | APROMA<br><br>(2000)                              |

Expediente No. 25000-23-27-000-2001-0479-01  
Acumulados Nos. 2000-0428, 2001-0122, 2001-0343  
Actor: GUSTAVO MOYA ÁNGEL Y OTROS  
Acción Popular

|                             |                                                                                                                                                                                                                                                                                                                                                                                                                                                                                                                                                               |                                                       |
|-----------------------------|---------------------------------------------------------------------------------------------------------------------------------------------------------------------------------------------------------------------------------------------------------------------------------------------------------------------------------------------------------------------------------------------------------------------------------------------------------------------------------------------------------------------------------------------------------------|-------------------------------------------------------|
|                             | calculado y dirigido hacia la conservación de los valores bióticos del ecosistema fluvial.                                                                                                                                                                                                                                                                                                                                                                                                                                                                    |                                                       |
| Caudal Ambiental            | Es el régimen hídrico que se establece en un río, humedal o zona costera para sustentar ecosistemas y sus beneficios donde hay usos del agua que compiten entre sí y donde los caudales están regulados. El caudal ambiental es usado para valorar cuánta agua puede quitársele al río sin causar un nivel inaceptable de degradación del ecosistema ribereño en el caso de ríos gravemente alterados. Se considera caudal ambiental la cantidad de agua necesaria para restablecer el río y rehabilitar el ecosistema hasta un estado o condición requerida. | King & Louw (1998); Palau (1994); Dyson et al. (2003) |
| Caudal de Acondicionamiento | Se refiere a un caudal que puede establecerse como complemento de caudales mínimos o de mantenimiento, para una finalidad concreta, ajena a la conservación de valores bióticos del ecosistema fluvial y referida a aspectos abióticos (dilución,                                                                                                                                                                                                                                                                                                             | Palau (2003)                                          |

Expediente No. 25000-23-27-000-2001-0479-01  
Acumulados Nos. 2000-0428, 2001-0122, 2001-0343  
Actor: GUSTAVO MOYA ÁNGEL Y OTROS  
Acción Popular

|                                    |                                                                                                                                                                                                                                                                                                                                                                                   |                           |
|------------------------------------|-----------------------------------------------------------------------------------------------------------------------------------------------------------------------------------------------------------------------------------------------------------------------------------------------------------------------------------------------------------------------------------|---------------------------|
|                                    | paisaje,<br><br>usos recreativos, etc.)                                                                                                                                                                                                                                                                                                                                           |                           |
| Caudal de<br><br>Compensación      | Caudal mínimo necesario para asegurar la supervivencia de un ecosistema acuático preestablecido.                                                                                                                                                                                                                                                                                  | UNESCO (s.f)              |
| Régimen de Caudal<br><br>Ambiental | Es aquel que permite cumplir con una condición establecida del ecosistema ribereño. En se detallan caudales específicos en<br><br>magnitud, periodicidad, frecuencia y duración, tanto de caudales basales como de avenidas y crecientes en la escala de variabilidad intra e interanual, todo ello diseñado para mantener en funcionamiento todos los componentes del ecosistema | King et al.<br><br>(1999) |

En general, la determinación de un caudal ecológico requiere la adopción de diferentes medidas y escenarios que ayuden a los gestores a decidir sobre el umbral mínimo requerido para el correcto funcionamiento del sistema, los cuales serán el referente para establecer las condiciones ambientales de los ríos, de tal forma que exista un funcionamiento ecológico adecuado. En otras palabras, se deben tener en cuenta variables como provisión de agua en los ríos y sistemas asociados de suficiente calidad, cantidad, duración y estacionalidad, para mantener los ecosistemas acuáticos y los humedales para asegurar, además del funcionamiento ecológico,

Expediente No. 25000-23-27-000-2001-0479-01  
Acumulados Nos. 2000-0428, 2001-0122, 2001-0343  
Actor: GUSTAVO MOYA ÁNGEL Y OTROS  
Acción Popular

beneficios ambientales, sociales y económicos "aguas abajo" en una represa<sup>141</sup>.

La problemática es más que evidente, la creciente explotación mundial de los recursos hídricos ha llevado a una reducción significativa de la biodiversidad de los ecosistemas dulceacuícolas y de los servicios que aportan los ríos, por cuanto ya muchos de ellos han dejado de fluir.

Es cada vez más evidente que la biodiversidad de los ecosistemas dulceacuícolas, a escala regional y mundial, está en mayor peligro. Los sistemas de agua dulce albergan menos de 0.01% del total mundial de las aguas superficiales, y en donde el 40% de las especies son peces de importancia para la funcionalidad biológica del ecosistema. Asimismo, la comunidad, el agua de los ríos, los lagos y los humedales para muchas cosas: para beber, para la producción de alimentos, para la industria, y para la pesca, la navegación, la recreación y las actividades culturales<sup>142</sup>.

Resulta de suma importancia tomar conciencia sobre esta problemática de tal forma que se logre un aprovechamiento sostenible, por cuanto se seguirá entendiendo que los ríos son solamente proveedores de agua como drenajes. De aquí que muchos de los ríos del mundo entero hayan

---

<sup>141</sup> Universidad Nacional de Colombia (Grupo GIREH), Ministerio de Ambiente, Vivienda y Desarrollo Territorial (Grupo OEI), convenio 004/2007. 2008. Metodología para la estimación del caudal ambiental en proyectos licenciados.

<sup>142</sup> Ibídem.

Expediente No. 25000-23-27-000-2001-0479-01  
Acumulados Nos. 2000-0428, 2001-0122, 2001-0343  
Actor: GUSTAVO MOYA ÁNGEL Y OTROS  
Acción Popular

perdido su caudal y muchos otros no transporten ya sino aguas residuales.

Para la Sala fomentar y garantizar la gestión integrada del caudal ambiental resulta relevante, como también el desarrollo y formulación de normas y políticas de manejo del agua, que restrinjan la alteración y el uso del recurso hídrico, en aras de lograr un equilibrio con el manejo del ecosistema. De esta manera, existe en el contexto latinoamericano la "*Estrategia para el manejo integrado de los recursos hídricos*", formulada por el Banco Iberoamericano de Desarrollo en 1998. La estrategia es un marco de gestión que puede adaptarse a las necesidades propias de cada país, y su objetivo principal es la conservación del agua mediante el uso de métodos eficientes para asignar el recurso.

En Colombia y como se ha precisado, el marco de manejo de los recursos hídricos está formulado por distintas normas: La Constitución Política de 1991, que en su artículo 8º se refiere a la intervención del Estado sobre el manejo y aprovechamiento de los recursos naturales renovables; el Código Nacional de Recursos Naturales Renovables Decreto-Ley 2811 de 1974, donde se plantea que tanto el Estado como los particulares deben procurar preservar, mediante un manejo adecuado, los recursos naturales; el Decreto 1541 de 1978, que complementa el Decreto-Ley 2811 de 1974, específicamente para el caso del agua en todos sus estados; el Decreto 1594 de 1984, que igualmente complementa el Decreto-Ley 2811 de 1974, y que dispone la obligación de formular un Plan de Ordenamiento del Recurso Hídrico para destinar el agua a

Expediente No. 25000-23-27-000-2001-0479-01  
Acumulados Nos. 2000-0428, 2001-0122, 2001-0343  
Actor: GUSTAVO MOYA ÁNGEL Y OTROS  
Acción Popular

diferentes usos; y los Planes de Ordenamiento y Manejo de Cuencas Hidrográficas (POMCA).

Lo anterior para resaltar que aún no existe una metodología reglamentada en Colombia para definir caudales ecológicos, aplicable a todas las corrientes del país. Esto puede conllevar a la aplicación de distintos métodos de estimación (*unos menos exigentes que otros*), que generan diferentes alteraciones sobre las corrientes en las que son aplicados.

Partiendo de la premisa que los caudales ambientales se calculan para la protección y conservación de especies dentro de una corriente de agua con potencial hidroeléctrico u otros usos, es supremamente relevante conocer y estudiar los requerimientos mínimos de intrínseca variabilidad de preferencia de hábitat de los organismos que se van afectar y no asumirlos. Para de este modo, generar políticas ambientales que los tengan en cuenta, no se trata de calcular el caudal ecológico por medio de métodos hidrológicos e hidráulicos, si no teniendo claro una imagen global de su parte ecosistémica, económica y social.

En cuanto a la sostenibilidad de la cuenca del río Bogotá, bien lo precisó la Contraloría General de la República<sup>143</sup> cuando señaló que *"un tema que debe ser abordado en el corto o mediano plazo es la incapacidad de aplicar el instrumento denominado "caudal ecológico y ambiental". Es el Estado el encargado de proporcionar las*

---

<sup>143</sup> Auditoria Especial a la Gestión sobre el Río Bogotá - Intersectorial y Articulada. Febrero 2013.

Expediente No. 25000-23-27-000-2001-0479-01  
Acumulados Nos. 2000-0428, 2001-0122, 2001-0343  
Actor: GUSTAVO MOYA ÁNGEL Y OTROS  
Acción Popular

*herramientas para ello". Continúa señalando que "esta situación se agudiza en la cuenca del río Bogotá donde la asimetría existente en la oferta y demanda del recurso hídrico afecta el caudal ecológico y ambiental. Este desequilibrio se origina por la presión sobre el recurso hídrico ejercida por la concentración poblacional (9.125.000 habitantes, más del 20% de la población nacional), por la expansión urbana de los municipios aledaños a su ribera, y por la demanda por parte de los acueductos y de los sectores productivos (el 25% del pib nacional se produce en la cuenca); sin que se considere la oferta hídrica existente en los diversos instrumentos de planificación y de toma de decisión, no se adelanten acciones tendientes a la protección de la cuenca, ni la generación de sistemas de regulación y almacenamiento, ni la construcción de obras o sistemas de saneamiento y conducción, y sin que se haga la provisión suficiente de recursos financieros para la ejecución de obras debidamente priorizadas".*

En resumen, precisó que la situación *"es crítica en la cuenca del río Bogotá, cuyo caudal ecológico y ambiental está siendo afectado drásticamente..."*.

Teniendo en cuenta lo anterior y el acervo probatorio allegado al proceso, **LA SALA ORDENARÁ** la implementación de los siguientes programas, planes y proyectos que incluye esta estrategia:

- Protección y reforestación de las áreas de manejo a las cuales hace referencia el Código de Recursos

Expediente No. 25000-23-27-000-2001-0479-01  
Acumulados Nos. 2000-0428, 2001-0122, 2001-0343  
Actor: GUSTAVO MOYA ÁNGEL Y OTROS  
Acción Popular

Naturales - Decreto 2811 de 1974 y las de especial importancia.

- Protección y reforestación de páramos, subpáramos, nacimientos de agua y zonas de recarga de acuíferos.
- Control de explotación de los recursos naturales.
- Recuperación de las áreas degradadas por actividades de explotación de los recursos naturales.
- Saneamiento ambiental y manejo de humedales.
- Adquisición de ecosistemas estratégicos.
- Implementación de incentivos y esquemas de pago por servicios ambientales.
- Determinación de caudal ambiental y ecológico.
- Programas de uso adecuado y racional del agua.
- Sostenibilidad y disponibilidad del recurso hídrico.
- Programa de recuperación y mantenimiento del Embalse del Muña.
- Programa de recuperación ecosistémica del Salto de Tequendama como Distrito de Manejo Integrado.

**Objetivo 2. Mejorar la calidad del agua, mitigar y reducir la contaminación del recurso hídrico**

Estrategia: Alcanzar y mantener los objetivos de calidad establecidos para el río Bogotá en el Acuerdo 043 de 2006 de la Corporación Autónoma Regional de Cundinamarca - CAR y Resolución 571 de la Secretaría Distrital de Ambiente.

El objetivo está relacionado con la adopción de medidas estratégicas para la reducción y/o eliminación de las

Expediente No. 25000-23-27-000-2001-0479-01  
Acumulados Nos. 2000-0428, 2001-0122, 2001-0343  
Actor: GUSTAVO MOYA ÁNGEL Y OTROS  
Acción Popular

principales causas y fuentes de contaminación del recurso hídrico, a través de líneas de acciones priorizadas sobre el cauce del río Bogotá.

Los programas, planes y proyectos que incluye esta estrategia se dirigen a:

- Adopción, modificación y actualización de Planes Maestro de Acueducto y Alcantarillado - PMAA.
- Adopción, modificación y actualización de Planes de Saneamiento y Manejo de Vertimientos - PSMV.
- Adopción, modificación y actualización de Planes de Gestión de Residuos Sólidos - PGRS.
- Manejo y control de los residuos de la actividad industrial.
- Manejo y control de los residuos de la actividad agropecuaria.
- Fomento de actividades de producción limpia.
- Fortalecimiento de la red de monitoreo e indicadores.

En este sentido, la Sala precisará conceptos claves tales como la calidad y caracterización de los cuerpos de agua, las propiedades fisicoquímicas y biológicas, los parámetros de calidad del agua y los impactos naturales y antropogénicos sobre el mismo, para finalmente hacer referencia a las causas y fuentes de contaminación del río Bogotá y las estrategias de control, reducción y mitigación de las mismas.

Expediente No. 25000-23-27-000-2001-0479-01  
Acumulados Nos. 2000-0428, 2001-0122, 2001-0343  
Actor: GUSTAVO MOYA ÁNGEL Y OTROS  
Acción Popular

- Calidad de los cuerpos de agua

Siguiendo al Ideam<sup>144</sup> "la calidad del agua está definida por su composición química y por sus características físicas y biológicas, adquiridas a través de los diferentes procesos naturales y antropogénicos. (...) La composición general de los diversos tipos de agua de la hidrosfera pueden estudiarse mejor dentro del marco del ciclo hidrológico", al cual la Sala hizo referencia líneas atrás.

La Sala recuerda que la alteración de la composición del agua puede presentarse por la descarga de variados y múltiples elementos producto de las actividades socioeconómicas propias de una región o zona del país.

Cualquier modificación natural o artificial, directa o indirecta, cambia la calidad del agua y, por ende, perturba, modifica y/o transforma el medio ambiente en su concepción general e interdisciplinaria descrita en acápites anteriores. Se puede señalar sin dubitación alguna que uno de los procesos que generan gran impacto y alteración en el ciclo hidrológico es la **contaminación de las aguas**.

Según el Diccionario de la Real Academia de la Lengua contaminar es "alterar nocivamente la pureza o las condiciones normales de una cosa o un medio por agentes químicos o físicos".

---

<sup>144</sup>El Medio Ambiente en Colombia. Capítulo 4°. El Agua. Ideam 1998. Página 151 y 152.

Expediente No. 25000-23-27-000-2001-0479-01  
Acumulados Nos. 2000-0428, 2001-0122, 2001-0343  
Actor: GUSTAVO MOYA ÁNGEL Y OTROS  
Acción Popular

En su concepción técnica la calidad del agua y su grado de contaminación se relaciona con *"la modificación fisicoquímica, biológica o radiológica del recurso natural, agua, inducida por las actividades socioeconómicas que limitan o perjudican su uso, se fija por la comparación de los valores que asumen los parámetros fisicoquímicos, biológicos, microbiológicos y radiológicos con estándares y criterios preestablecidos"*<sup>145</sup>.

Cualquier cambio químico, físico o biológico en la calidad del agua puede tener efecto negativo en ésta, en los seres vivos que habitan en ella o en quienes la consumen.

El agua representa aproximadamente el 70% del planeta y es parte esencial de la vida misma, contribuye además al bienestar general de la población.

Desde siempre el hombre ha vertido sus desechos a los ríos, sin embargo el manejo y recuperación del recurso hídrico ha sido prácticamente nulo y desconocido desde la Edad Media. Ya, en tiempos más actuales, se empezó el desarrollo y construcción de los sistemas de alcantarillado y saneamiento en general.

En condiciones normales los ríos pueden autodepurarse: las aguas arrastran los desechos hacia los océanos, las bacterias utilizan el oxígeno disuelto en las aguas y degradan los compuestos orgánicos, que a su vez, son consumidas por los peces y las plantas acuáticas

---

<sup>145</sup> Ibídem. Página 153.

Expediente No. 25000-23-27-000-2001-0479-01  
Acumulados Nos. 2000-0428, 2001-0122, 2001-0343  
Actor: GUSTAVO MOYA ÁNGEL Y OTROS  
Acción Popular

devolviendo el oxígeno y el carbono a la biósfera. No obstante, a medida que la humanidad ha venido evolucionando, esto se hace cada vez más difícil.

Las industrias concentran millares de personas en su entorno. Muchas veces los sistemas se encuentran saturados de desechos, y las empresas descargan productos que no pueden ser degradados por las bacterias. Todo esto hace que el contenido de oxígeno disminuya drásticamente, y que los afluentes limiten su capacidad para mantener la vida en él.

Resulta importante precisar que los agentes contaminantes *"no son necesariamente sustancias dañinas propiamente dichas, lo que hace que una sustancia se convierta en contaminante es su concentración en cantidades excesivas, en un lugar indebido o en un momento inoportuno"*<sup>146</sup>.

La contaminación puede provenir de fuentes naturales o debido a diferentes procesos productivos del ser humano - *fuentes antropogénicas* - que hacen parte de las actividades propias de la vida.

Las fuentes que generan contaminación de origen antropogénico más relevantes son: industriales (*frigoríficos, mataderos y curtiembres, actividad minera y petrolera*), comerciales (*envolturas y empaques*), agrícolas (*agroquímicos*), domiciliarias (*envases, pañales, restos de jardinería*) y fuentes móviles (*gases de combustión de vehículos*), desagües de aguas negras o contaminadas al mar o ríos, tala y quema de bosques.

---

<sup>146</sup> Ibídem 153.

Expediente No. 25000-23-27-000-2001-0479-01  
Acumulados Nos. 2000-0428, 2001-0122, 2001-0343  
Actor: GUSTAVO MOYA ÁNGEL Y OTROS  
Acción Popular

Tres factores son determinantes en cuanto al origen de la contaminación:

- 1. La densidad poblacional.
- 2. El nivel de producción y consumo.
- 3. La utilización de instrumentos tecnológicos.

MAPA CONCEPTUAL DE LA CONTAMINACIÓN<sup>147</sup>

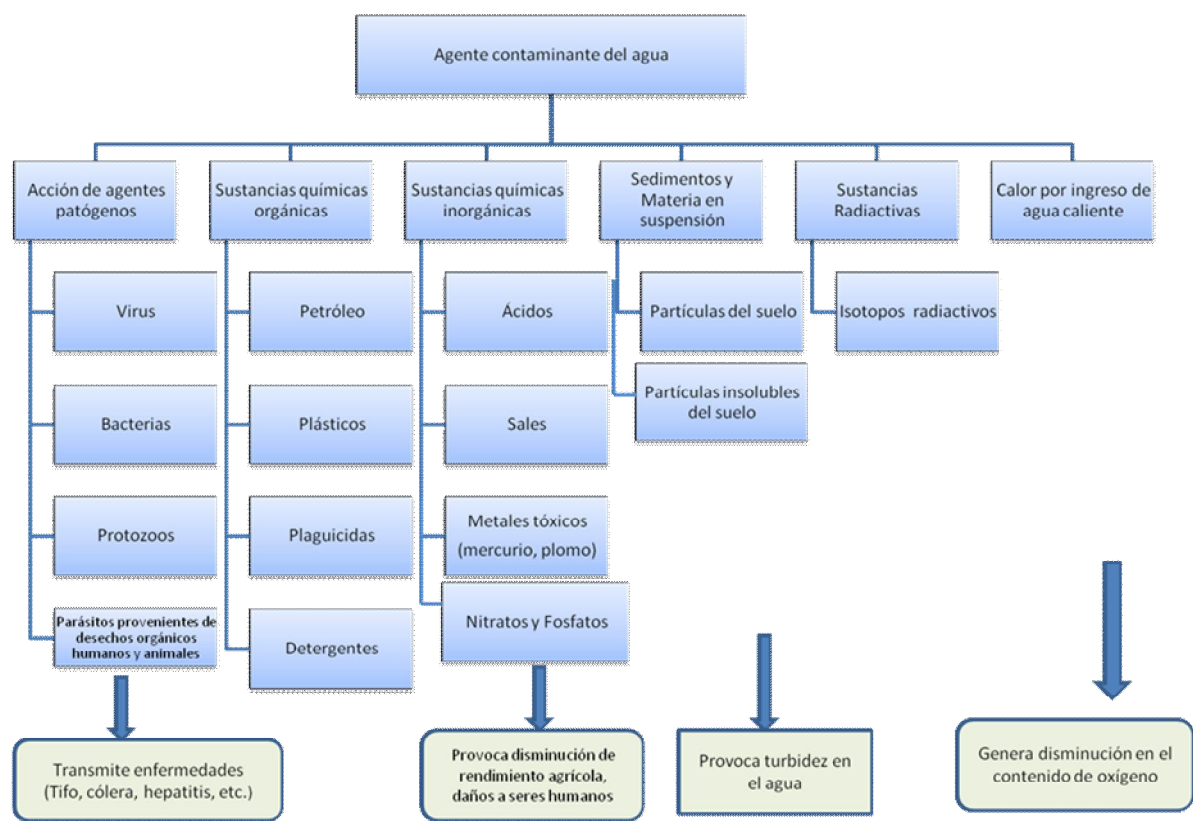

hora bien, los principales contaminantes del agua son:

- Sustancias químicas inorgánicas.- ácidos, compuestos de metales tóxicos (Mercurio, Plomo), envenenan el agua.

<sup>147</sup>Fuente: Ideam 2013.

Expediente No. 25000-23-27-000-2001-0479-01  
Acumulados Nos. 2000-0428, 2001-0122, 2001-0343  
Actor: GUSTAVO MOYA ÁNGEL Y OTROS  
Acción Popular

- Los nutrientes vegetales pueden ocasionar el crecimiento excesivo de plantas acuáticas que después mueren y se descomponen, agotando el oxígeno del agua y de este modo causan la muerte de las especies marinas (zona muerta).
- Agentes patógenos.- Bacterias, virus, protozoarios, parásitos que entran a las aguas provenientes de desechos orgánicos.
- Desechos que requieren oxígeno.- Los desechos orgánicos pueden ser descompuestos por bacterias que usan oxígeno para biodegradarlos. Si hay poblaciones grandes de estas bacterias, pueden agotar el oxígeno del agua, matando así las formas de vida acuáticas.
- Sustancias químicas orgánicas.- Petróleo, plásticos, plaguicidas, detergentes que amenazan la vida.
- Sustancias radiactivas que pueden causar defectos congénitos y cáncer.
- Sedimentos o materia suspendida.- Partículas insolubles de suelo que enturbian el agua.
- Calor.- el agua caliente disminuye el contenido de oxígeno y hace que los organismos sean vulnerables.

Los Mayores problemas de calidad del agua a escala global se resumen a continuación<sup>148</sup>:

| Tipo de contaminante o problema de contaminación | Cuerpo de agua |       |                  |
|--------------------------------------------------|----------------|-------|------------------|
|                                                  | Ríos           | Lagos | Agua subterránea |
| Patógenos                                        | Xxx            | x     | X                |
| Sólidos suspendidos                              | Xx             | na    | Na               |

<sup>148</sup>Fuente Ideam 2013.

Expediente No. 25000-23-27-000-2001-0479-01  
Acumulados Nos. 2000-0428, 2001-0122, 2001-0343  
Actor: GUSTAVO MOYA ÁNGEL Y OTROS  
Acción Popular

|                                       |     |    |                  |
|---------------------------------------|-----|----|------------------|
| Materia orgánica biodegradable        | Xxx | x  | X                |
| Eutroficación                         | X   | xx | Na               |
| Nitrato como contaminante             | X   | 0  | Xxx              |
| Salinización                          | X   | 0  | Xxx              |
| Elementos traza (pesticidas, metales) | Xx  | xx | Xx               |
| Microcontaminantes orgánicos          | Xxx | xx | xxx <sup>3</sup> |
| Acidificación                         | X   | xx | 0                |

X= Baja significación local XX= Significación moderada local/regional XXX= Significación alta local/regional

La contaminación proviene de fuentes puntuales y/o difusas, como bien lo ha considerado la Agencia de Protección Ambiental de Estados Unidos:

- Las fuentes puntuales descargan contaminantes en localizaciones específicas a través de tuberías y alcantarillas. Ej: Fábricas, plantas de tratamiento de aguas negras, minas, pozos petroleros, etc.
- Las fuentes no puntuales o difusas son grandes áreas de terreno que descargan contaminantes al agua sobre una región extensa. Ej: Vertimiento de sustancias químicas, tierras de cultivo, lotes para pastar ganado, construcciones, tanques sépticos, la escorrentía agrícola, fuentes también de contaminación del suelo.

Tal división es seguida por el Ideam en Colombia:

Expediente No. 25000-23-27-000-2001-0479-01  
Acumulados Nos. 2000-0428, 2001-0122, 2001-0343  
Actor: GUSTAVO MOYA ÁNGEL Y OTROS  
Acción Popular

*"La contaminación proviene de fuentes puntuales y/o difusas. Una fuente puntual es una entrada de contaminantes que puede estar relacionada con una salida simple; los vertimientos no tratados, o tratados inadecuadamente, son tal vez una fuente de este tipo, otras fuentes puntuales incluyen minería o efluentes industriales. Las fuentes puntuales pueden estar localizadas espacialmente en los ambientes acuáticos y algunas se caracterizan por una descarga relativamente constante de sustancias contaminantes en periodos de tiempo específicos; aunque pueda presentarse fluctuaciones debido a descargas accidentales. Ejemplo de este tipo son aguas residuales domésticas.*

*Las fuentes difusas no pueden adscribirse a un punto o a una actividad humana simple, aunque puede tratarse de fuentes individuales simples dirigidas a un cuerpo de agua sobre un área extensa, como la escorrentía en áreas de actividad agrícola, cuyo drenaje transfiere partículas orgánicas e inorgánicas de suelo, nutrientes plaguicidas, y herbicidas a los cuerpos de agua adyacentes, la escorrentía urbana proviene de los viaductos de la ciudad y áreas adyacentes no canalizadas al sistema de alcantarillado; los lugares de disposición de residuos sólidos y/o líquidos que impactan principalmente las aguas subterráneas, etc."*

Ahora bien, los efectos de la contaminación del agua en la salud no se hacen esperar, según la Organización Mundial de la Salud, dicha contaminación representa un gran problema. La OMS se refiere a los mecanismos de transmisión de las enfermedades de la siguiente manera<sup>149</sup>:

*"a) Directos. Por ingestión de agua contaminada, procedente de abastecimientos de grandes poblaciones o de pozos contaminados. En otros casos es por contacto cutáneo o mucoso (con fines*

---

<sup>149</sup> Salud Pública y AP de Salud. Contaminación del Agua. OMS.

Expediente No. 25000-23-27-000-2001-0479-01  
Acumulados Nos. 2000-0428, 2001-0122, 2001-0343  
Actor: GUSTAVO MOYA ÁNGEL Y OTROS  
Acción Popular

recreativos, contacto ocupacional o incluso terapéutico) pudiendo originar infecciones locales en piel dañada o infecciones sistémicas en personas con problemas de inmunodepresión.

b) Indirecto. El agua actúa como vehículo de infecciones, o bien puede transmitirse a través de alimentos contaminados por el riego de aguas residuales. Así mismo, los moluscos acumulan gran cantidad de polivirus y pueden ser ingeridos y afectar a los seres humanos. Finalmente, algunos insectos que se reproducen en el agua son transmisores de enfermedades como el paludismo o la fiebre amarilla”.

El siguiente cuadro puede ser aún más ilustrativo<sup>150</sup>:

| CONTAMINANTES                                                                                                | FUENTES                                                       | EFECTOS // SALUD                                                                                                                                                                                             |
|--------------------------------------------------------------------------------------------------------------|---------------------------------------------------------------|--------------------------------------------------------------------------------------------------------------------------------------------------------------------------------------------------------------|
| Bacterias patógenas:<br>Salmonella<br>Shigella<br>Escherichia coli<br>Vibrio cholerae<br>Campylobacter fetus | Agua residual, contaminada con excretas de hombre o animales. | Enfermedades cuyo índice de gravedad va desde gastroenteritis hasta casos graves, a veces fatales, de disentería, cólera o tifoidea.                                                                         |
| Bacterias oportunistas:<br>Pseudomonas<br>Flavobacterium<br>Acinetobacter<br>Klesbsiella<br>Serratia         | Agua residual, contaminada con excretas de hombre o animales. | No se les considera patógenas, pero su presencia en el agua puede estar asociada con infecciones de la piel y membranas mucosas de los ojos, oídos, nariz y garganta, sobre todo en individuos susceptibles. |
| Virus entéricos<br>Hepatitis A, E.                                                                           | Principalmente descargas de                                   | Son comunes las infecciones sub-                                                                                                                                                                             |

<sup>150</sup> Fuente: Taller Internacional para la difusión de las guías de la OMS sobre calidad del agua (Memorias).

Expediente No. 25000-23-27-000-2001-0479-01  
Acumulados Nos. 2000-0428, 2001-0122, 2001-0343  
Actor: GUSTAVO MOYA ÁNGEL Y OTROS  
Acción Popular

|                                                                                                                            |                                                                                                                                    |                                                                                                                                                                                                                                   |
|----------------------------------------------------------------------------------------------------------------------------|------------------------------------------------------------------------------------------------------------------------------------|-----------------------------------------------------------------------------------------------------------------------------------------------------------------------------------------------------------------------------------|
|                                                                                                                            | <i>agua residual</i>                                                                                                               | <i>clínicas. Pueden presentarse gastroenteritis y hepatitis infecciosa en proporciones epidémicas y endémicas.</i>                                                                                                                |
| Protozoos:<br>Entamoeba histolytica<br>Giardia spp.<br>Cryptosporidium<br>Balantidium coli                                 | Provienen de las aguas residuales de origen doméstico                                                                              | Agentes etiológicos de la amibiasis (disentería), giardiasis, cryptosporidiosis y balantidiasis. Enfermedades diarreicas, abscesos hepáticos y cerebrales.                                                                        |
| Helmintos:<br>Tremátodos (lombrices de ganado lanar)<br>Céstodos (tenias)<br>Nemátodos (lombrices cilíndricas)             | Aguas contaminadas con aguas domésticas o copépodos (huéspedes intermedios)                                                        | Los helmintos intestinales producen una gran variedad de síntomas. Muchas de las infecciones son de carácter subclínico, aunque algunas son fatales.<br>Los esquistosomas infestan el hígado, intestino, vejiga y otros órganos   |
| Organismos de vida libre:<br>fitoplancton, zooplancton (protozoos, rotíferos, cladóceras, copépodos)<br>Macroinvertebrados | Se forman en aguas superficiales, reservorios de almacenamiento descubiertos, en pozos abiertos y en los sistemas de distribución. | Algunas sustancias tóxicas producidas por las algas pueden afectar la salud. Las algas y sus productos extracelulares son parte de la materia orgánica precursora de los trihalometanos que se forman durante la cloración. Estos |

Expediente No. 25000-23-27-000-2001-0479-01  
Acumulados Nos. 2000-0428, 2001-0122, 2001-0343  
Actor: GUSTAVO MOYA ÁNGEL Y OTROS  
Acción Popular

|  |  |                                                                                                                 |
|--|--|-----------------------------------------------------------------------------------------------------------------|
|  |  | organismos interfieren con el tratamiento del agua, y causan problemas de olor, sabor y obstrucción de filtros. |
|--|--|-----------------------------------------------------------------------------------------------------------------|

- Caracterización de los cuerpos de agua

Para la identificación de los cuerpos de agua existen dos conceptos fundamentales: las propiedades fisicoquímicas y las características biológicas.

Las propiedades fisicoquímicas

El agua tiene unas características propias que la convierten en un disolvente único e insustituible. Se pueden clasificar en físicas y químicas. En general, se puede señalar que el agua es un líquido inodoro e insípido, incoloro, transparente y con color azul si se observa en franjas de varios metros de espesor.

Para ilustrar el tema el Ideam ha precisado<sup>151</sup>:

*"Cada cuerpo de agua tiene un patrón individual de carácter físico y químico característico, determinado por las condiciones climáticas, geomorfológicas y geoquímicas que prevalecen en los sistemas hídricos superficiales y subterráneos del área de drenaje. Las características resumidas, tales como los sólidos totales disueltos, la conductividad eléctrica y el potencial redox, ofrecen una clasificación general de cuerpos de agua similares, presentes en la naturaleza. El contenido de minerales, determinado por los sólidos totales disueltos, es*

<sup>151</sup> Ibídem. Página 153.

Expediente No. 25000-23-27-000-2001-0479-01  
Acumulados Nos. 2000-0428, 2001-0122, 2001-0343  
Actor: GUSTAVO MOYA ÁNGEL Y OTROS  
Acción Popular

*un rasgo esencial en la calidad de cualquier cuerpo de agua y es consecuencia del balance entre disolución y precipitación. El contenido de oxígeno es un rasgo vital de cualquier cuerpo de agua, porque está fuertemente influenciado por la solubilidad de los metales, esencial para todas las formas de vida biológica.*

*La calidad química del ambiente acuático varía de acuerdo a la geología local, al clima, a la distancia, al océano y a la cantidad de suelo cubierto, entre otros factores. Si las aguas superficiales estuvieran totalmente infectadas por la actividad humana, entre un 90% y un 99% de las aguas superficiales tendrían las concentraciones naturales de las especies químicas necesarias para la vida acuática y para la mayor parte de los usos humanos.*

*En la calidad del agua, el material particulado es un factor clave, ya que regula los procesos de absorción de otras sustancias; estos procesos dependen de la cantidad, el tipo, el carácter y del tiempo de contacto entre el material particulado (orgánico e inorgánico) con volumen unitario de agua. La variabilidad temporal de las partículas disueltas y el contenido de materia en los cuerpos de agua resulta principalmente de las interacciones entre la variabilidad temporal de las partículas disueltas y el contenido de materia en los cuerpos de agua resulta principalmente de las interacciones entre la variabilidad hidrodinámica, la solubilidad mineral, las características del material y la naturaleza e intensidad de la actividad biológica".*

#### **- Características biológicas**

Como se mencionó líneas atrás, el agua es el componente por excelencia para la existencia de todo ser vivo, siendo en particular un disolvente biológico. Es una

Expediente No. 25000-23-27-000-2001-0479-01  
Acumulados Nos. 2000-0428, 2001-0122, 2001-0343  
Actor: GUSTAVO MOYA ÁNGEL Y OTROS  
Acción Popular

biomolécula<sup>152</sup> que representa el medio en el cual ocurren la mayoría de las reacciones celulares del metabolismo.

Sobre el particular, el Ideam indicó:

*"El desarrollo de biota (fauna y flora) en las aguas superficiales está dictado por una variedad de condiciones ambientales, que determinan la selección de especies, así como también el comportamiento fisiológico de los organismos individuales. La productividad primaria de la materia orgánica, en la forma de fitoplancton y micrófitos, es intensiva en lagos y reservorios y muy limitada en los ríos. La degradación de la sustancias orgánicas y la producción bacterial asociada es un proceso que toma tiempo, lo cual es importante en las aguas subterráneas y en lagos de cierta profundidad, cuando no están expuestos directamente a la luz del sol.*

*En contraste con la calidad química de los cuerpos de agua, que puede ser medida con métodos analíticos adecuados, la descripción de la calidad biológica de un cuerpo de agua requiere una combinación de características cualitativas y cuantitativas. El monitoreo biológico puede hacerse a dos niveles diferentes la respuesta de las especies individuales a los cambios en su ambiente o la respuesta de las comunidades biológicas a los cambios de su ambiente.*

*El sistema de clasificación de la calidad del agua, basado en características biológicas, ha sido desarrollado para una variedad de cuerpos de agua. El análisis químico de especies seleccionadas (ostras, por ejemplo) y otros tejidos seleccionados (músculo o hígado de peces) para evaluar contaminantes, puede ser considerado como una combinación de un monitoreo químico y biológico. Las calidad biológica, incluyendo los análisis químico de la biota, tiene una dimensión temporal mayor que la calidad química del agua,*

---

<sup>152</sup>Las biomoléculas son las moléculas constituyentes de los seres vivos.

Expediente No. 25000-23-27-000-2001-0479-01  
Acumulados Nos. 2000-0428, 2001-0122, 2001-0343  
Actor: GUSTAVO MOYA ÁNGEL Y OTROS  
Acción Popular

*puesto que la biota puede ser afectada por especies químicas, por factores hidrológicos, por eventos ocurridos pocos días, algunos meses o años antes de que el monitoreo fuera efectuado".*

- **Parámetros de calidad del agua**

Para determinar la calidad del agua se deben seleccionar unas variables, las cuales dependen de los objetivos que se fijen en los instrumentos de planeación correspondientes, de acuerdo con los usos del recurso.

*"La selección apropiada de los parámetros permite alcanzar las metas de eficiencia en los procesos de mejoramiento de la calidad del agua. Cada parámetro debe ser discutido con respecto a sus orígenes, fuentes, comportamiento, transporte y transformación en el sistema acuático. Los criterios de calidad del agua se establecen científicamente de acuerdo con los factores de intensidad; estos criterios forman la base para juzgar, con respecto a la compatibilidad de la composición del agua, los objetivos ecológicos o los requeridos para un determinado uso. Los estándares son reglas, principios o niveles de tolerancia establecidos por las autoridades ambientales, como parte de los programas de conservación de la calidad del recurso hídrico para propósitos específicos. El proceso de fijar estos criterios se desarrolla a través de experimentos científicos. Un criterio de calidad del agua puede estar basado en la morbilidad o toxicidad crónica de varias sustancias para el hombre o la vida acuática, o también puede estar relacionado con los métodos técnicos para remover sustancias específicas del agua"<sup>153</sup>.*

---

<sup>153</sup> Ibídem. Página 159.

Expediente No. 25000-23-27-000-2001-0479-01  
Acumulados Nos. 2000-0428, 2001-0122, 2001-0343  
Actor: GUSTAVO MOYA ÁNGEL Y OTROS  
Acción Popular

Existe multiplicidad de parámetros ambientales que se usan como variables para conocer la calidad del agua, entre los cuales tenemos<sup>154</sup>:

**TEMPERATURA:** *La temperatura tiene una gran influencia sobre otras variables de calidad acuática. La tarea metabólica de los organismos está relacionada con la temperatura, y en las aguas cálidas la respiración incrementa el consumo de oxígeno y la descomposición de la materia orgánica, como consecuencia de ello se pueden presentar eventos de mortandad masiva de peces en tramos específicos de las corrientes, a la vez que se hace mayor el crecimiento de bacterias y fitoplancton, lo cual produce en algunos tramos el incremento de turbidez del agua y el aumento masivo de algas, debido a las condiciones de suministro de nutrientes. La temperatura de las aguas superficiales generalmente se encuentra entre 0 y 30°C.*

**ACIDEZ Y ALCALINIDAD:** *Está basada en la capacidad de neutralización de ácidos y se expresan generalmente como milimoles por litro (mmol/L).*

**CONDUCTIVIDAD ELÉCTRICA:** *Es una medida de la capacidad de una solución acuosa para conducir una corriente eléctrica, depende de la presencia de iones, su concentración total, movilidad, valencia, concentración relativa y temperatura de medición.*

**OXÍGENO DISUELTO Y DÉFICIT DE OXÍGENO:** *Es el oxígeno libremente disponible en el agua. La solubilidad del*

---

<sup>154</sup>Ibídem. Páginas 157 a 167.

Expediente No. 25000-23-27-000-2001-0479-01  
Acumulados Nos. 2000-0428, 2001-0122, 2001-0343  
Actor: GUSTAVO MOYA ÁNGEL Y OTROS  
Acción Popular

oxígeno en el agua se debe a varios factores, en particular, a la temperatura, presión atmosférica y salinidad, que para la mayoría de aguas superficiales se puede considerar cercana a 0. El contenido de oxígeno de las aguas naturales varía con la temperatura, la salinidad, la turbulencia, la actividad fotosintética y la presión atmosférica; la solubilidad del oxígeno disminuye a medida que la temperatura y la salinidad se incrementan. El agua superficial al nivel del mar, el OD varía de 15 hasta 8 mg  $O_2/L$ , a temperaturas entre  $0^{\circ}C$  y  $25^{\circ}C$ .

**DEMANDA BIOQUÍMICA DE OXÍGENO:** Es una medida de la cantidad de oxígeno consumido en el proceso biológico de degradación de la materia orgánica en el agua; la  $DBO_5$  representa la cantidad de oxígeno consumido por dicho proceso en cinco días. El término degradable puede interpretarse como expresión de la materia orgánica que eventualmente sirve de alimento a las bacterias presentes en las aguas naturales, en las aguas residuales domésticas y en las aguas residuales industriales. La  $DBO$  permite obtener información sobre la capacidad de amortiguación de los efectos relacionados con la disminución de oxígeno, en términos de la autodepuración de una corriente de agua y es la base de cálculo para el diseño de las plantas de tratamiento.

**DEMANDA QUÍMICA DE OXÍGENO:** Es una medida de oxígeno requerido para oxidar todos los compuestos químicos, tanto orgánicos como inorgánicos, presentes en el agua, por la acción de los agentes fuertemente oxidantes en un medio ácido. Esta demanda se expresa en miligramos de

Expediente No. 25000-23-27-000-2001-0479-01  
Acumulados Nos. 2000-0428, 2001-0122, 2001-0343  
Actor: GUSTAVO MOYA ÁNGEL Y OTROS  
Acción Popular

oxígeno por litro ( $\text{mg O}_2/\text{L}$ ). La materia orgánica se oxida hasta convertirse en dióxido de carbono y agua, mientras que el nitrógeno orgánico se convierte en amoníaco.

**SÓLIDOS SUSPENDIDOS TOTALES:** Se usa ampliamente para la mayoría de los compuestos que están presentes en las aguas naturales y que permanecen en estado sólido después de la evaporación (algunos compuestos orgánicos permanecen en estado líquido después de que el agua ha sido evaporada). Los sólidos suspendidos totales (SST) y los sólidos disueltos totales (SDT) corresponden a los residuos no filtrables y filtrables, respectivamente; la materia suspendida es una fracción que no pasa a través de un filtro con diámetro de poro 0,45mm.

**TURBIDEZ:** Es una mezcla que oscurece o disminuye la claridad natural o transparencia del agua.

**NUTRIENTES:** Son compuestos necesarios para los procesos bioquímicos de los organismos acuáticos, son derivados químicos inorgánicos del nitrógeno y del fósforo. Los nutrientes así definidos tienen significado ambiental si se tiene en cuenta dos consideraciones básicas: la primera, los ciclos biogeoquímicos de los elementos nitrógeno y fósforo, cada uno de ellos en sus diferentes formas químicas, muchas de las cuales están asociadas a los diferentes grados de oxidación y pueden estar presentes dependiendo de las condiciones particulares del recurso hídrico. La otra originada en los procesos químicos y bioquímicos implicados en la transformación de las sustancias químicas dispuestas por las actividades de origen antrópico, como los vertimientos de efluentes

Expediente No. 25000-23-27-000-2001-0479-01  
Acumulados Nos. 2000-0428, 2001-0122, 2001-0343  
Actor: GUSTAVO MOYA ÁNGEL Y OTROS  
Acción Popular

*industriales, domésticos, agrícolas (plaguicidas, fertilizantes), y relaves de las industrias extractivas (minería).*

**METALES PESADOS:** *Son elementos metálicos de alto peso atómico (mercurio, cobre, cromo, cadmio, arsénico y plomo).*

- **Calidad del agua en Colombia**

Colombia es el sexto país con mayor oferta hídrica en el mundo, el Ministerio de Ambiente ha identificado que la mitad de los recursos hídricos tienen problemas de calidad. Se estima que la industria, el sector agropecuario y las aguas domésticas generan 9 mil toneladas de materia orgánica contaminante de los acuíferos.

Con precipitaciones anuales promedio de 1.800 mililitros -cuando en el resto de naciones del planeta son de 900 mililitros-, cerca de 720 cuencas hidrográficas y alrededor de 10 ríos con caudales permanentes, se podría pensar que hay agua ilimitada para todos. Sin embargo, la situación es preocupante.

Según el Informe nacional sobre la gestión del agua en Colombia, elaborado con apoyo de la Asociación Mundial del Agua y la Comisión Económica para América Latina (Cepal), las fuentes que contribuyen al deterioro del agua y al incremento constante de la contaminación en el país son diferentes, siendo los sectores agropecuario, industrial y doméstico los principales responsables, ya

Expediente No. 25000-23-27-000-2001-0479-01  
Acumulados Nos. 2000-0428, 2001-0122, 2001-0343  
Actor: GUSTAVO MOYA ÁNGEL Y OTROS  
Acción Popular

que en conjunto generan cerca de 9 mil toneladas de materia orgánica contaminante.

De acuerdo con la información del Segundo Foro Mundial del Agua realizado en el año 2000 en La Haya, señala que al entorno natural se descargan casi 4.500.000 m<sup>3</sup> de aguas residuales domésticas e industriales, y la mayoría de los municipios no cuentan con plantas para su tratamiento. Ciudades del nivel de Barranquilla tan solo tienen a su disposición lagunas de oxidación antes del vertimiento de las aguas, mientras la capital, Bogotá, cuenta con una planta de tratamiento que solo procesa el 20% de lo que producen los habitantes.

Según el Estudio Nacional del Agua (2010), que realiza cada cuatro años el Instituto de Hidrología, Meteorología y Estudios Ambientales (Ideam), la mayor parte del sistema hídrico andino colombiano se ha alterado debido al transporte de sedimentos y sustancias tóxicas, con una incidencia marcada de los corredores industriales ubicados en las cuencas de los corredores Bogotá - Soacha, Medellín - Itagüí, Cali - Yumbo, Sogamoso - Duitama - Nobsa, Barranquilla - Soledad y Cartagena - Mamonal, lo que afecta gravemente la calidad del líquido en los ríos Magdalena, Medellín, Bogotá y Cauca.

De acuerdo con el Ministerio de Ambiente, Vivienda y Desarrollo Territorial, hoy Ministerio de Ambiente y Desarrollo Sostenible, el 95% de las aguas residuales domésticas, el 85% de las aguas residuales industriales y el 95% de las aguas residuales agrícolas se vierten sin

Expediente No. 25000-23-27-000-2001-0479-01  
Acumulados Nos. 2000-0428, 2001-0122, 2001-0343  
Actor: GUSTAVO MOYA ÁNGEL Y OTROS  
Acción Popular

tratamiento, situación reveladora en términos de impacto ambiental.

El impacto de la contaminación hídrica en el país se presenta<sup>155</sup>:

### ***Sobre los ecosistemas***

"Son actualmente muchas las corrientes hídricas que se ven afectadas por la creciente contaminación generada por los vertimientos de aguas residuales, generando condiciones anóxicas (casos ríos Bogotá, Medellín, Cali, Sogamoso, etc.). También se ha incrementado la problemática de eutroficación o colmatación de cuerpos de agua, como sucede en las lagunas de Fúquene y Sonzo, y los humedales en la Sabana de Bogotá. Según el Inventario Nacional del Sector de Agua Potable y Saneamiento, cerca de 1.300 cuerpos de agua están siendo contaminados por ser los receptores de los vertimientos municipales. La oferta hídrica se ha reducido notablemente, en términos de calidad, debido a la presencia de elementos nocivos para los diferentes usos del recurso, por el vertimiento de sustancias patógenas, tóxicas, mutagénicas, corrosivas o abrasivas".

### ***Impactos sanitarios y de salubridad***

"Los principales impactos asociados con el sector de agua potable y saneamiento en el país se relacionan con la salud pública. La falta de acceso a servicios de agua potable y alcantarillado, unido a bajos niveles económicos y falta de educación e higiene, conforman un cuadro de alto riesgo para la salud de la población, especialmente para la infantil. La poca disponibilidad de agua potable, la contaminación con residuos fecales, e inadecuados

---

<sup>155</sup>Fuente: Ministerio de Ambiente y Desarrollo Sostenible. 2012.

Expediente No. 25000-23-27-000-2001-0479-01  
 Acumulados Nos. 2000-0428, 2001-0122, 2001-0343  
 Actor: GUSTAVO MOYA ÁNGEL Y OTROS  
 Acción Popular

*hábitos de higiene personal están asociados con enfermedades diarreicas, hepatitis A, tifoidea, cólera, y shigellosis, entre otras. Enfermedades como las diarreicas tienen un costo económico significativo y están asociadas con dolor físico particularmente para la población infantil. Enfermedades como cólera, tifoidea, shigellosis requieren medicamentos como antibióticos y exigen hospitalización. Al costo de los tratamientos médicos de enfermedades como la hepatitis, el cólera o la tifoidea se debe adicionar el costo de la pérdida laboral. Las pérdidas de días de trabajo en enfermedades como el cólera están en 8 a 35 días, hepatitis A de 10 a 15 días, shigellosis entre 4 y 8 días, amebiasis de 2 a 10 días, y tifoidea de 5 a 20 días.*

*En Colombia, de 1991 a 1997 se registraron entre 4'400.000 y 3'500.000 casos de enfermedades diarreicas respectivamente. El costo de tratamiento de cada enfermedad se estimó en US \$30,00 y el costo de la pérdida de días de trabajo en US \$60,00. Por tanto el costo anual asociado con la morbilidad de índole diarreica anual se estima oscila entre US\$315 y 400 millones de dólares de EUA. A una tasa de descuento del 10 % anual, el valor presente neto del costo asociado se estima en más de US \$ 3000 millones".*

#### **Impacto sobre la economía**

*"La contaminación de las fuentes hídricas en el país ha generado una reducción de la pesca en los ríos del país, pérdida de productividad de las tierras aledañas por riego contaminado, los costos de potabilización del agua crecen el 15% anual sumado a la deficiencia en la operación del mas de 50% de las plantas de tratamiento de agua residual asociadas a factores de índole técnico, financiero, ambiental y político".*

- Calidad del agua en el río Bogotá

Expediente No. 25000-23-27-000-2001-0479-01  
Acumulados Nos. 2000-0428, 2001-0122, 2001-0343  
Actor: GUSTAVO MOYA ÁNGEL Y OTROS  
Acción Popular

Tanto la Corporación Autónoma Regional de Cundinamarca - CAR como la Secretaría Distrital de Ambiente realizan seguimiento al recurso hídrico en su jurisdicción, a través del monitoreo y análisis de parámetros fisicoquímicos y microbiológicos, esto con el fin de verificar el cumplimiento de la normatividad nacional - Decreto 1594 de 1984 y de la expedida por dichas autoridades, Acuerdo 043 del 17 de octubre de 2006 CAR y Resolución 5731 de 2008 Secretaría Distrital de Ambiente.

**a. Objetivos de calidad del agua en la cuenca a 2020 - Acuerdo 043 de 2006 - CAR**

Para el desarrollo de los programas estratégicos establecidos en el POMCA, la CAR expidió el Acuerdo 043 de 2006, documento que constituye marco legal del control de la calidad del recurso hídrico en su área de jurisdicción.

Los objetivos de calidad de la cuenca del río Bogotá, se fundamentan en los principios de:

- Sostenibilidad de la oferta del recurso hídrico.
- Uso eficiente del recurso.
- Equidad.
- Racionalidad económica.
- Sostenibilidad financiera.
- Planeación.
- Participación y coordinación.

Los valores establecidos en el Acuerdo para los parámetros de DBO5 y Coliformes Totales, para cada una de

Expediente No. 25000-23-27-000-2001-0479-01  
Acumulados Nos. 2000-0428, 2001-0122, 2001-0343  
Actor: GUSTAVO MOYA ÁNGEL Y OTROS  
Acción Popular

las clases de usos del agua definidos para el río Bogotá, son los siguientes<sup>156</sup>:

| CLASE | Valor más restrictivo   |                               |
|-------|-------------------------|-------------------------------|
|       | DBO <sub>5</sub> (mg/l) | Coliformes totales (NMP/10Ml) |
| I     | 7                       | 5000                          |
| II    | 7                       | 20000                         |
| III   | 20                      | 5000                          |
| IV    | 50                      | 20000                         |
| V     | 70                      | No reporta                    |

Con el fin de abordar el diagnóstico de la calidad del agua de la cuenca del río Bogotá, su trayecto se dividió en cinco tramos de la siguiente manera:

1. Cuenca Alta-Superior al sector comprendido entre Villapinzón y Tibitoc.
2. Cuenca Alta-Inferior entre Tibitoc y la estación hidrometeorológica la Virgen.
3. Cuenca Media entre la estación hidrometeorológica la Virgen y las compuertas Alicachín, en inmediaciones del embalse del Muña.
4. Cuenca Baja - superior desde El Embalse del Muña hasta la descarga del río Apulo.
5. Cuenca Baja Inferior desde la descarga del río Apulo hasta la desembocadura del río Bogotá en el Magdalena.

Para cada uno de los tramos de la Cuenca del río Bogotá establecidos anteriormente se determinaron las

<sup>156</sup> Fuente: Car 2011.

Expediente No. 25000-23-27-000-2001-0479-01  
Acumulados Nos. 2000-0428, 2001-0122, 2001-0343  
Actor: GUSTAVO MOYA ÁNGEL Y OTROS  
Acción Popular

condiciones actuales en los parámetros de DBO y Coliformes totales de la siguiente manera<sup>157</sup>:

| Parámetro                     | Cuenca                            |                                   |                                   |                                   |                                   |
|-------------------------------|-----------------------------------|-----------------------------------|-----------------------------------|-----------------------------------|-----------------------------------|
|                               | Alta-Superior                     | Alta-Inferior                     | Media                             | Baja-Superior                     | Baja-Inferior                     |
| DBO (mg/L)                    | 20-70                             | 70-150                            | 200-270                           | 100-200                           | 100-200                           |
| Coliformes totales (NMP/10Ml) | 10 <sup>3</sup> - 10 <sup>5</sup> | 10 <sup>3</sup> - 10 <sup>5</sup> | 10 <sup>5</sup> - 10 <sup>9</sup> | 10 <sup>5</sup> - 10 <sup>9</sup> | 10 <sup>3</sup> - 10 <sup>8</sup> |

b. Objetivos de calidad para los ríos Salitre, Fucha, Tunjuelo y el Canal Torca en el Distrito Capital - Resolución 5731 de 2008 - Secretaría Distrital de Ambiente

En la Resolución 5731 se adoptó el documento titulado "*concentraciones de referencia para los vertimientos industriales realizados a la red de alcantarillado y de los vertimientos industriales y domésticos efectuados a cuerpos de agua de la ciudad de Bogotá - Informe Objetivos de Calidad*", como información de soporte para el establecimiento de los objetivos de calidad de los Ríos Salitre, Fucha y Tunjuelo y del Canal Torca, dentro del perímetro urbano de Bogotá. Así mismo, se consideró que ese documento serviría como base conceptual del programa de tasas retributivas adelantado por la Secretaría Distrital de Ambiente - SDA.

En lo atinente a la fijación de objetivos de calidad, se adoptaron los siguientes tramos:

<sup>157</sup>Fuente: Car 2011.

Expediente No. 25000-23-27-000-2001-0479-01  
Acumulados Nos. 2000-0428, 2001-0122, 2001-0343  
Actor: GUSTAVO MOYA ÁNGEL Y OTROS  
Acción Popular

|              |       | Límites                             |                                       |
|--------------|-------|-------------------------------------|---------------------------------------|
| Cuenca       | Tramo | Desde                               | Hasta                                 |
| Río Tunjuelo | 1     | Entrada<br>perímetro<br>urbano      | Desembocadura<br>Quebrada<br>Yomasa   |
|              | 2     | Desembocadura<br>Q. Yomasa          | Avenida<br>Boyacá                     |
|              | 3     | Avenida<br>Boyacá                   | Autopista Sur                         |
|              | 4     | Autopista Sur                       | Desembocadura<br>Río Tunjuelo         |
| Río Fucha    | 1     | Entrada<br>perímetro<br>urbano      | Carrera 7ª                            |
|              | 2     | Carrera 7ª                          | Desembocadura<br>Canal<br>Comuneros   |
|              | 3     | Desembocadura<br>Canal<br>Comuneros | Avenida<br>Boyacá                     |
|              | 4     | Avenida<br>Boyacá                   | Desembocadura<br>Río Fucha            |
| Río Salitre  | 1     | Entrada<br>perímetro<br>urbano      | Carrera 7ª                            |
|              | 2     | Carrera 7ª                          | Carrera 30                            |
|              | 3     | Carrera 30                          | Avenida 68                            |
|              | 4     | Avenida 68                          | Desembocadura<br>Río Juan<br>Amarillo |
| Canal Torca  | 1     | Entrada<br>perímetro<br>urbano      | Calle 183                             |
|              | 2     | Calle 183                           | Desembocadura<br>Canal Torca          |

Expediente No. 25000-23-27-000-2001-0479-01  
Acumulados Nos. 2000-0428, 2001-0122, 2001-0343  
Actor: GUSTAVO MOYA ÁNGEL Y OTROS  
Acción Popular

La división de los tramos realizada no involucró las corrientes afluentes que convergen a la corriente principal en el tramo mencionado. Para el establecimiento de objetivos de calidad en estas corrientes, se determinó puntualmente la viabilidad de establecer objetivos específicos, mediante el avance en la consecución y la validación de la información técnica correspondiente.

Por lo anterior y de acuerdo con la división por tramos, se establecieron los objetivos de calidad: a cuatro (4) años periodo (2009-2012) y a diez (10) años, esto es, a 2019.

- **Manejo y disposición de residuos sólidos**

Ahora bien, la Sala destaca la importancia de la disposición de los residuos sólidos en relación con la calidad del recurso hídrico. La *"gestión integrada"* se aplica a todas las actividades asociadas con el manejo de los diversos flujos de residuos dentro de la sociedad; y su meta básica es *"administrar los residuos de una forma que sea compatible con el medio ambiente y la salud pública"*.

Según los diversos estudios, el manejo de los residuos sólidos en el país, históricamente, se ha venido realizando en función de la prestación del servicio de aseo. La preocupación por los residuos generados en los centros urbanos ha partido de las consideraciones de tipo higiénico y sanitario, por lo tanto el problema se abordó desde el momento en que la comunidad colocaba los residuos en la vía pública para que alguien los retirara;

Expediente No. 25000-23-27-000-2001-0479-01  
Acumulados Nos. 2000-0428, 2001-0122, 2001-0343  
Actor: GUSTAVO MOYA ÁNGEL Y OTROS  
Acción Popular

en dicho momento aparece la necesidad de establecer un proceso de recolección, como parte fundamental de un servicio público, sin importar el lugar al cual se llevaban dichos residuos, o estableciendo como métodos de disposición la descarga al aire libre o a cuerpos de agua sin considerar las externalidades de tipo ambiental, lo cual propició una cultura hacia la disposición incontrolada.

Necesariamente la política ambiental tiene como eje fundamental la gestión integrada de residuos sólidos - GIRS-, ya sean no peligrosos o peligrosos, como término aplicado a todas las actividades asociadas con el manejo de los diversos flujos de residuos dentro de la sociedad y su meta es administrarlos de una forma compatible con el medio ambiente y la salud pública.

La GIRS contempla las siguientes etapas jerárquicamente definidas:

- Reducción en la fuente u origen
  - Aprovechamiento y valorización
  - Tratamiento y transformación
  - Disposición final controlada
- 
- **Reducción en la fuente u origen.** Es la forma más eficaz de reducir la cantidad y toxicidad de residuos, el costo asociado a su manipulación y los impactos ambientales.

Expediente No. 25000-23-27-000-2001-0479-01  
Acumulados Nos. 2000-0428, 2001-0122, 2001-0343  
Actor: GUSTAVO MOYA ÁNGEL Y OTROS  
Acción Popular

- **Aprovechamiento y valorización.** El aprovechamiento implica la separación y recogida de materiales residuales en el lugar de su origen; la preparación de estos materiales para la reutilización, el reprocesamiento, la transformación en nuevos productos, y la recuperación de productos de conversión (por ejemplo, compost) y energía en forma de calor y biogas combustible.

El aprovechamiento es un factor importante para ayudar a conservar y reducir la demanda de recursos naturales, disminuir el consumo de energía, preservar los sitios de disposición final y reducir la contaminación ambiental. Además, el aprovechamiento tiene un potencial económico, ya que los materiales recuperados son materias primas que pueden ser comercializadas.

En consecuencia la primera acción sobre los residuos generados es valorarlos y aprovecharlos.

- **Tratamiento y transformación.** La transformación de residuos implica la alteración física, química o biológica de los residuos. Típicamente, las transformaciones físicas, químicas y biológicas que pueden ser aplicadas a los residuos sólidos urbanos son utilizadas para mejorar la eficacia de las

Expediente No. 25000-23-27-000-2001-0479-01  
Acumulados Nos. 2000-0428, 2001-0122, 2001-0343  
Actor: GUSTAVO MOYA ÁNGEL Y OTROS  
Acción Popular

operaciones y sistemas de gestión de residuos.

- **La disposición final controlada.** Por último, hay que hacer algo con los residuos que no tienen ningún uso adicional, la materia residual que queda después de la separación de residuos sólidos en las actividades de recuperación de materiales y la materia residual restante después de la recuperación de productos de conversión o energía; para lo cual se debe garantizar una **disposición final controlada**, además se debe poseer una capacidad adecuada en los sitios de disposición final y planes para la clausura;

Para lograr maximizar el aprovechamiento de los residuos generados, es fundamental partir de la separación en el origen y dar **un manejo** diferente a los conceptos de residuos sólidos aprovechables frente al de basuras.

Los residuos sólidos comprenden los domésticos, comerciales e institucionales, las basuras de la calle, los escombros de la construcción, los residuos generados en las diferentes actividades productivas de bienes y servicios, que a nivel macro comprende los sectores industrial, agropecuario, de servicios y mineros.

Los objetivos no pueden ser otros que desarrollar e implantar un plan de gestión integral de residuos sólidos

Expediente No. 25000-23-27-000-2001-0479-01  
Acumulados Nos. 2000-0428, 2001-0122, 2001-0343  
Actor: GUSTAVO MOYA ÁNGEL Y OTROS  
Acción Popular

y ello es, esencialmente, una actividad local que implica la selección correcta de alternativas y tecnologías para afrontar las necesidades de la administración local de residuos, a la vez que se atienden las consideraciones ambientales.

Los municipios tienen la tarea de a través de la inclusión del PGIR en el POT "impedir" o "minimizar", de forma eficiente el riesgo que para las personas y el medio ambiente ocasionan los residuos sólidos, sean o no peligrosos; minimizar la cantidad o la peligrosidad de los que llegan a los sitios de disposición final, contribuyendo a la protección ambiental eficaz y al crecimiento económico.

En cuanto a las estrategias, se encuentran:

- Desarrollar los programas de minimización en el origen.
- Modificar los patrones de consumo y producción insostenibles.
- Crear nuevos canales de comercialización.
- Fortalecer cadenas de reciclaje.
- Mejorar las condiciones de trabajo del recuperador.
- Formular programas para la disposición final controlada.
- Transformar los actuales botaderos en rellenos sanitarios.
- Diseñar e implementar mecanismos de apoyo y asistencia técnica para la localización,

Expediente No. 25000-23-27-000-2001-0479-01  
Acumulados Nos. 2000-0428, 2001-0122, 2001-0343  
Actor: GUSTAVO MOYA ÁNGEL Y OTROS  
Acción Popular

construcción, operación, mantenimiento y clausura de los sitios de disposición final.

- Implementar un programa de seguimiento de los planes de manejo ambiental aprobados.
- Promover la realización de proyectos de disposición final intermunicipales para áreas metropolitanas y municipios cercanos.
- Fortalecer la vigilancia y control.
- Realizar inventarios de generación de residuos peligrosos.
- Definir sistemas de gestión de los residuos peligrosos.
- Educación y participación ciudadana.
- Sistemas de información sobre residuos sólidos.
- Planificación y coordinación institucional.
- Apoyo de las instituciones científicas de ciencia y tecnología.

Líneas de acción:

- Elaborar un inventario sistematizado sobre el estado de investigación y desarrollo tecnológico en residuos sólidos a nivel nacional e internacional, por la autoridad o Gerencia de cuenca con el apoyo de las entidades que la integran dentro del ámbito de su competencia.
- Estructurar y consolidar la Red de Investigación, innovación y transferencia de tecnología en residuos sólidos.
- Consolidar las Unidades de Apoyo tecnológico adscritas a la red, en los niveles regional y

Expediente No. 25000-23-27-000-2001-0479-01  
Acumulados Nos. 2000-0428, 2001-0122, 2001-0343  
Actor: GUSTAVO MOYA ÁNGEL Y OTROS  
Acción Popular

municipal para apoyo a la investigación, transferencia y divulgación de las innovaciones en residuos sólidos.

- Realizar campañas educativas de reciclaje en la fuente a través de la educación formal, no formal y con el apoyo de los medios de comunicación masiva en la región de la cuenca.
- Precisar las finanzas municipales para el manejo y recolección de basuras así como de la instalación de los sitios de destinación final, de ser posible con carácter regional.

Acciones a seguir:

- Prevención y minimización de los residuos y su peligrosidad.
- Reutilización.
- Recolección selectiva.
- Reciclaje y otras formas de valorización.
- Valorización energética.
- Regeneración de los suelos y de los espacios degradados.

El manejo integral y sustentable de los residuos sólidos combina flujos de residuos, métodos de recolección y procesamiento, de lo cual derivan beneficios ambientales, optimización económica y aceptación social en un sistema de manejo práctico para cualquier región. Esto se puede lograr combinando opciones de manejo que incluyen esfuerzos de rehúso y reciclaje, tratamientos que involucran compostaje, biogasificación, incineración con recuperación de energía, así como la disposición final en

Expediente No. 25000-23-27-000-2001-0479-01  
Acumulados Nos. 2000-0428, 2001-0122, 2001-0343  
Actor: GUSTAVO MOYA ÁNGEL Y OTROS  
Acción Popular

rellenos sanitarios. El punto clave no es cuántas opciones de tratamiento se utilicen, o si se aplican todas al mismo tiempo, sino que sean parte de una estrategia que responda a las necesidades y contextos locales o regionales, así como a los principios básicos de las políticas ambientales en la materia<sup>158</sup>.

Por ello, estima la Sala que los entes territoriales tendrán que adelantar los mecanismos necesarios para que los municipios incluyan los PGIRS en sus Planes de Ordenamiento Territorial acorde con las necesidades de la cuenca del Río Bogotá.

Le corresponde al alcalde municipal dentro del contexto del Plan de Desarrollo y la instrumentación de los servicios públicos, procurar porque el servicio de aseo se preste de manera organizada en cumplimiento de lo exigido por las autoridades ambientales tanto del orden nacional (Ministerio de Medio Ambiente, Vivienda y Desarrollo Territorial) como de las regionales, además de las entidades de vigilancia y control como la Superintendencia de Servicios Públicos, entre otras.

El Ministerio del Medio Ambiente, Vivienda y Desarrollo Territorial, expidió la resolución número 1045 de 2003, en desarrollo del artículo 2° de la Ley 142 de 1994 y el artículo 8° del Decreto 1713 de 2002, con el objeto de adoptar la metodología para la elaboración y ejecución de los Planes de Gestión Integral de Residuos Sólidos, PGIRS, estandarizar los conceptos para facilitar la

---

<sup>158</sup>Documento Gestión Integral de Residuos Sólidos, Hernando Rodríguez Herrera, Fundación Universitaria del Área Andina, 2012.

Expediente No. 25000-23-27-000-2001-0479-01  
Acumulados Nos. 2000-0428, 2001-0122, 2001-0343  
Actor: GUSTAVO MOYA ÁNGEL Y OTROS  
Acción Popular

sistematización y análisis del sector, plan financiero, presupuesto y plan de inversiones que incluye costo de inversión, administración, operación y mantenimiento de los proyectos, actividades y acciones que hacen parte de los programas que componen el PGIRS y que se ejecutarán en un tiempo determinado, para lograr sus objetivos y metas a corto, mediano y largo plazo de manera costo-efectiva y eficiente.

Destaca igualmente la resolución la necesidad de articular los PGIRS con los Planes de Ordenamiento Territorial, acorde con los principios de integralidad de la gestión de los residuos sólidos a nivel territorial.

De otra parte la Sala considera fundamental destacar el papel de los recicladores en el manejo de residuos sólidos, sin embargo en relación con el reconocimiento de la actividad comercial, social y el tránsito hacia la formalidad de ellos, se hace imprescindible que se abran e institucionalicen espacios para acrecentar esta labor de primer orden en la Gestión Integral de los Residuos Sólidos en la Cuenca del río Bogotá.

También cabe advertir por la Sala que de conformidad con lo establecido en el artículo 8 del Decreto 1713 de 2002, es responsabilidad de las entidades territoriales, elaborar y mantener actualizado el PGIRS. La formulación y elaboración del PGIRS deberá realizarse bajo un esquema de participación con los actores involucrados en la gestión, manejo y disposición de los residuos sólidos.

- **Actividad de la industria de las curtiembres**

Expediente No. 25000-23-27-000-2001-0479-01  
Acumulados Nos. 2000-0428, 2001-0122, 2001-0343  
Actor: GUSTAVO MOYA ÁNGEL Y OTROS  
Acción Popular

Al igual que con el manejo y disposición de los residuos sólidos, se encuentra otra actividad que genera gran impacto sobre la calidad del agua, esto es, la actividad de la industria de las curtiembres:

*Origen y características de los vertimientos de las curtiembres*

En la industria de las curtiembres el proceso consiste en convertir las pieles de los animales en cuero. La materia seca de la piel es casi en su totalidad proteína, de la que el 85% es colágeno. Los procesos preliminares preparan las proteínas de la piel (principalmente el colágeno), de forma que puedan eliminarse todas las impurezas indeseables, dejando el colágeno en condición de absorber el tanino o el cromo utilizado en el curtido.

El curado supone la deshidratación de la piel secándola con sal o aire con el fin de detener la degradación de las enzimas proteolíticas. El descarnado elimina los tejidos grasos de la piel por medios mecánicos. El lavado y la impregnación eliminan la suciedad, las sales, la sangre, los desperdicios y las proteínas no fibrosas y devuelven la humedad perdida durante el almacenamiento. La eliminación del pelo se realiza utilizando cal, con o sin sulfuro de sodio; esto hace que la piel sea más atractiva y facilita la eliminación de las impurezas proteínicas. El macerado prepara la piel para el curtido reduciendo el pH, la hinchazón, peptizando las fibras y eliminando los productos de degradación de las proteínas.

Expediente No. 25000-23-27-000-2001-0479-01  
Acumulados Nos. 2000-0428, 2001-0122, 2001-0343  
Actor: GUSTAVO MOYA ÁNGEL Y OTROS  
Acción Popular

El curtido de cromo se utiliza fundamentalmente para las pieles ligeras, mientras que el curtido con vegetales se sigue prefiriendo para la mayoría de los productos de pieles gruesas.

La decoloración con carbonato de sodio diluido, seguido por ácido sulfúrico, proporciona a la piel un color más claro y más uniforme antes del teñido. El residuo igualado de una curtiduría, incluyendo los lavados, tiene un alto contenido de sólidos de 6000-8000 ppm de los que aproximadamente la mitad (3000 ppm) son cloruro de sodio. Contiene alrededor de 900 ppm de DBO, 1600 ppm de dureza total, 120 ppm de sulfuro, 1000 ppm de proteínas y de 30-70 ppm de cromo. Es de gran importancia saber el alto contenido de DBO, dureza sulfuro cromo y lodos.

Las grandes fluctuaciones en la naturaleza de los residuos de las curtidurías, debidas a descargas intermitentes, hacen que sean difíciles de tratar, especialmente en combinación con las aguas residuales urbanas. Las proteínas y de otras materias extraídas de las pieles se estima que producen de 50 a un 70% de la carga de DBO y los productos químicos empleados en el proceso de un 30 a un 50%.

#### **Ubicación sectorial**

El estudio de la pequeña y mediana industria curtidora pasa necesariamente por el análisis de la problemática del barrio San Benito de Bogotá donde se encuentra la

Expediente No. 25000-23-27-000-2001-0479-01  
Acumulados Nos. 2000-0428, 2001-0122, 2001-0343  
Actor: GUSTAVO MOYA ÁNGEL Y OTROS  
Acción Popular

inmensa mayoría de las pequeñas industrias de este grupo.

San Benito como sector industrial tiene su origen en el desplazamiento de los curtidores de las provincias de Cundinamarca y Boyacá (Villapinzón) desde hace 42 años. La lejanía al centro de Bogotá para ese entonces y el hecho de estar en las riberas del Río Tunjuelito impulsó al incremento de industrias curtidoras de tipo artesanal hasta llegar a formar el complejo industrial de curtidores mayor de América Latina.

Mediante un censo se logró establecer que en el barrio San Benito, actualmente están ubicadas 267 Industrias relacionadas con la curtiduría de cueros, de las cuales nueve (9) se dedican al procesamiento de cola, 242 son de curtiduría de cuero de éstas, 202 curten al cromo, 28 curten al tanino, 12 curten cromo - tanino y 11 se dedican a terminado y bodegaje.

#### **Problemática ambiental**

La industria curtidora presenta una problemática ambiental en cuanto a los vertimientos por su alta concentración en sólidos, materia orgánica, nitrógeno sulfuros y sales minerales particularmente de cromo. Estas aguas residuales y la presencia de metales pesados afectan en forma peligrosa a la flora y la fauna a través de la magnificación, la acumulación en las especies y el traspaso de estas sustancias a través de la membrana biológica.

Expediente No. 25000-23-27-000-2001-0479-01  
Acumulados Nos. 2000-0428, 2001-0122, 2001-0343  
Actor: GUSTAVO MOYA ÁNGEL Y OTROS  
Acción Popular

El Cromo tiene efectos altamente peligrosos para el medio ambiente y la salud humana. En el ser humano puede producir fibrosis pulmonar y fibrosis hepática debido a que este metal se acumula en las células y es utilizado para la fabricación de proteínas. También produce problemas en la piel y daños en la sensibilidad que son irreparables por atrofia del sistema nervioso periférico y atrofia posterior de los miembros.

#### **Estado actual de la industria de las curtiembres en Colombia**

Aprovechando la información recolectada durante el censo, realizado por la Empresa de Acueducto y Alcantarillado de Bogotá, se obtuvieron algunos listados, como son:

- Clasificación de las industrias, por procesos
- Clasificación de industrias según el número de fulones
- Clasificación de las industrias, respecto a la construcción y mantenimiento de las estructuras de control de efluentes.
- Tabulación de análisis de laboratorio por industria y proceso.
- Industrias que cumplen, y no cumplen con las normas de vertimiento.
- Determinación del consumo teórico de agua, por periodo y por industria, etc.
- Determinación de tarifas para el cobro por mantenimiento adicional del alcantarillado, en función del consumo teórico de agua y de los contenidos de sólidos y grasas en los vertimientos.

Expediente No. 25000-23-27-000-2001-0479-01  
Acumulados Nos. 2000-0428, 2001-0122, 2001-0343  
Actor: GUSTAVO MOYA ÁNGEL Y OTROS  
Acción Popular

El primer estudio realizado en el plan piloto de caracterización de efluentes industriales-curtiembres Río Tunjuelito, incluyó tres de estas industrias y estableció que los vertimientos se caracterizan por las altas cargas orgánicas, gran cantidad de sólidos suspendidos, grasa y sustancias tóxicas.

### **Descripción del proceso**

El proceso de curtido puede ser llevado a cabo con diferentes tipos de pieles. En San Benito se utiliza fundamentalmente ganado vacuno. Este proceso conlleva una serie de operaciones, que se agrupan básicamente dentro de las etapas de ribera y curtido. Los pasos del proceso se enuncian a continuación:

- Recepción de materia prima
- Descarne preliminar
- Lavados iniciales
- Pelambre y encalado (remoción del pelo)
- Lavados de pelambre y encalado
- Descarne y dividido
- Desencalado y purga (eliminación gradual de la alcalinidad)
- Lavados de desencalado y purga
- Piquelado y curtición.
- Escurrido
- Rebajado
- Teñido y engrase

Expediente No. 25000-23-27-000-2001-0479-01  
Acumulados Nos. 2000-0428, 2001-0122, 2001-0343  
Actor: GUSTAVO MOYA ÁNGEL Y OTROS  
Acción Popular

### **Contaminación generada**

Se tomará como ejemplo el estudio hecho por la CAR en 1981 en las curtiembres de Villapinzón, las características Físico-Químicas de los efluentes en las diferentes operaciones del proceso de curtido manifiestan diversos grados de contaminación.

En cada operación del estudio se dan los siguientes resultados:

Color: Los efluentes con mayor intensidad de color son producidos en las operaciones de curtido con cromo y teñido.

pH: Efluentes con carácter fuertemente ácido (pH= 3.8) son producidos en el curtido al cromo y los efluentes con carácter fuertemente alcalino (pH= 123.3) Son producidas en el depilado de las pieles.

Alcalinidad total: la mayor concentración se presenta en el depilado de las pieles y es debido a la presencia de hidróxido de calcio, sodio y amonio.

Nitrógeno: La alta concentración de nitrógeno en los efluentes del depilado es de origen orgánico e indicativo de materia proteica.

DBO/DQO: Los efluentes que requieren mayor cantidad de O<sub>2</sub> para su estabilización biológico y química son los producidos en el teñido y depilado de pieles.

Expediente No. 25000-23-27-000-2001-0479-01  
Acumulados Nos. 2000-0428, 2001-0122, 2001-0343  
Actor: GUSTAVO MOYA ÁNGEL Y OTROS  
Acción Popular

El estudio concluye: "a través de la relación DBO/DQO de cada efluente, se puede establecer el siguiente orden decreciente de biodegradabilidad: desencalado, teñido, depilado, curtido con cromo".

Grasas y aceites: Solamente el depilado produce grasa en cantidades moderadas.

Sólidos: El contenido de sólidos en las curtiembres es alto principalmente en el depilado y curtido en cromo. Los sólidos en su mayor parte se encuentran disueltos en porcentajes que oscilan entre el 68 y 69%, son en su mayoría, de naturaleza orgánica excepto los productos en el curtido con cromo que son en su mayoría inorgánicos.

Sulfuros: Se encuentra normalmente en los efluentes producidos en el depilado. Pequeñas cantidades aparecen en los procesos posteriores debido fundamentalmente a un mal lavado.

Cromo trivalente ( $\text{Cr}^{+3}$ ): Se encuentra normalmente en el efluente producido en el curtido. Las curtiembres de San Benito mensualmente vierten 64068 m<sup>3</sup> de aguas residuales así: 9000 m<sup>3</sup> pertenecientes a los lavados iniciales que presentan problemas por concentraciones altas de DBO y DQO: 5175 m<sup>3</sup> (Proceso de depilado) Tiene problemas por pH (12.3), sulfuros, DBO y DQO ; 43331 m<sup>3</sup> (desencalado) presenta problemas pH (11.7) , DBO y DQO, 3673 m<sup>3</sup> (curtido), presenta problemas de pH (3.8), cromo total, DBO y DQO ; y 2890 m<sup>3</sup> de agua residual (teñido) presentan concentraciones no admisibles de DQO y DBO (7).

Expediente No. 25000-23-27-000-2001-0479-01  
Acumulados Nos. 2000-0428, 2001-0122, 2001-0343  
Actor: GUSTAVO MOYA ÁNGEL Y OTROS  
Acción Popular

Los residuos sólidos e industriales que representan en primera instancia una serie de problemas son los producidos por el sulfurado o pelambre, por su alto volumen 83 ton.; su disposición final incorrecta; además porque estos sólidos poseen cromo, metal no biodegradable y que se magnifica en las especies, debido a esta última se debían separar los vertimientos de ribera y curtido; así como por razones económicas de pérdida de sustancias.

Hay una alta producción de hidróxido de calcio, insoluble, el cual manifiesta un pH básico. Este compuesto inorgánico es difícilmente biodegradable, pero puede ser de gran utilidad como materia prima de otros procesos, siempre y cuando no cuente con la presencia de sales de cromo.

*Informe de la industria del cuero a nivel nacional*

Análisis de cargas, análisis de parámetros: caso Colcurtidos- Bogotá.

| Parámetros                                        | Concentra<br>ción | Carga       |
|---------------------------------------------------|-------------------|-------------|
| Sólidos totales                                   | 1216 mg/l         | 1980.0 kg/d |
| 68% inorgánicos                                   |                   |             |
| 32% Orgánicos                                     |                   |             |
| Demanda Química de oxígeno (DQO)                  | 3110 mg/l         | 3904.0 kg/d |
| Demanda Bioquímica de oxígeno (DBO <sub>5</sub> ) | 1900 mg/l         | 2385.0 Kg/d |
| DQO/DBO <sub>5</sub> = 1.63                       |                   |             |
| Nitrógeno total                                   |                   | 239.0 Kg/d  |
| Grasas                                            | 1183 mg/l         | 1446.6 kg/d |
| Sulfuros                                          | 4-67 mg/l         |             |
| Cromo total                                       |                   | 101.2 kg/d  |
| Cromo hexavalente                                 |                   | 0.13 kg/d   |

Expediente No. 25000-23-27-000-2001-0479-01  
Acumulados Nos. 2000-0428, 2001-0122, 2001-0343  
Actor: GUSTAVO MOYA ÁNGEL Y OTROS  
Acción Popular

|                  |                       |
|------------------|-----------------------|
| Cr <sup>+6</sup> |                       |
| Caudal           | 770 m <sup>3</sup> /d |

Caracterización de algunos vertimientos de la industria de curtiembres de Colombia

|                            | CAU<br>DAL<br>m <sup>3</sup> /<br>d | DBO<br><sub>5</sub><br>kg/<br>d | SS<br>kg/d | Grasas<br>y<br>aceites<br>kg/d |
|----------------------------|-------------------------------------|---------------------------------|------------|--------------------------------|
| Antioqueña de curtidos*    | 630                                 | 457                             | 590.       |                                |
|                            |                                     | .39                             | 94         |                                |
| CURTIEMBRES DE ITAGUI S.A* | 198                                 | 3.5                             | 8.03       |                                |
|                            | 7                                   | 05.                             | 9.40       |                                |
|                            |                                     | 07                              |            |                                |
| CURTIEMBRES **             | 19.                                 | 34.                             | 140.       | 36.50                          |
|                            | 60                                  | 40                              | 7          |                                |
| COLCURTIDOS ***            | 770                                 | 2.3                             | 1.98       | 1446.6                         |
|                            |                                     | 85.                             | 0.00       |                                |
|                            |                                     | 00                              |            |                                |

\* Empresas públicas de Medellín, 1991

\*\*INDERENA Bolívar, 1991

\*\*\* Empresa de Acueducto y alcantarillado de Bogotá.

En estos términos la Sala considera que sobre la base de las iniciativas ambientales existentes, resulta fundamental contemplar el plano nacional, regional y sectorial, pues es en éstos últimos en los cuales se manejan las posibilidades de desarrollo y porque es el plano regional el centro de las decisiones ambientales críticas; se requiere igualmente de la participación de todos los actores para su desarrollo con miras a evitar que se fragmenten y pierda coherencia; como “procesos integrados” deben ser evaluados en el tiempo para hacer los ajustes y adaptaciones correspondientes acorde con las posibilidades reales de desarrollo.

Expediente No. 25000-23-27-000-2001-0479-01  
 Acumulados Nos. 2000-0428, 2001-0122, 2001-0343  
 Actor: GUSTAVO MOYA ÁNGEL Y OTROS  
 Acción Popular

- Diagnóstico del afluente

De conformidad con lo anterior, se presenta el estado del afluente en el marco de los siguientes informes:

- ii. Adecuación Hidráulica y Recuperación Ambiental del Río Bogotá.
- iii. Modelación dinámica de la calidad del agua del río Bogotá - Informe Producto No. 5 Universidad Nacional 2011.
- iv. Calidad del recurso hídrico de Bogotá 2011 - 2012 de la Universidad de los Andes y la Secretaría de Ambiente de Bogotá.
- v. Informe seguimiento cumplimiento objetivos de calidad para las nueve cuencas del segundo orden de la jurisdicción CAR Periodo 2012.

a. Adecuación hidráulica y recuperación ambiental del río Bogotá - CAR 2011

**"Factores de deterioro de la calidad del agua, riesgos.**

*El río Bogotá nace a los 3300 msnm en el municipio de Villapinzón y desemboca a los 380 msnm en el río Magdalena en el municipio de Girardot. En su recorrido de 336 Km, el río Bogotá recibe las aguas de los ríos Sisga, Neusa, Tibitoc, Tejar, Negro, Teusacá, Frío, Chicú, Salitre, Fucha, Tunjuelo, Siecha, Balsillas, (que a su vez recoge las aguas de los ríos Subachoque y Bojacá), Calandaima y Apulo.*

**Cuenca alta**

**La calidad del agua del río en su cuenca alta se ve afectada por los vertimientos de aguas residuales domésticas de municipios que aún no cuentan con sistema de tratamiento (por ejemplo Villapinzón), por la carga residual municipal de**

Expediente No. 25000-23-27-000-2001-0479-01  
 Acumulados Nos. 2000-0428, 2001-0122, 2001-0343  
 Actor: GUSTAVO MOYA ÁNGEL Y OTROS  
 Acción Popular

los efluentes de las Plantas de aguas Residuales - PTAR existentes (Chocontá, Sesquilé, otros), por los vertimientos de las industrias y la contaminación no puntual proveniente de las actividades agropecuarias.

#### **Cuenca media.**

En la cuenca media el río Bogotá se ve afectado por vertimientos industriales, de los establecimientos que vierten directamente al río, y por la carga residual municipal de los efluentes de la PTAR existentes (entre ellas, Zipaquirá, Cajicá, Chía, Tocancipá). Sin embargo, la causa fundamental del deterioro de la calidad del río en la cuenca media, lo constituyen los vertimientos de la ciudad de Bogotá, a través de los ríos urbanos y canales de aguas de escorrentía.

La carga contaminante de la ciudad está constituida por las aguas servidas de una población de 7 millones de habitantes, las conexiones erradas, los vertimientos industriales, los aportes de sólidos originados de los procesos erosivos de los cerros orientales y de malas prácticas de disposición de residuos sólidos en canales y sumideros.

#### **Sistema Hídrico de Bogotá.**

El sistema hídrico de Bogotá está conformado por el canal Torca y los ríos Salitre, Fucha, Tunjuelo. Estos ríos transportan la escorrentía superficial de la ciudad y los vertimientos de los usuarios que presentan conexiones erradas o no están conectados a la red de alcantarillado sanitario. A continuación una descripción general de los tributarios urbanos de la ciudad.

##### **Canal Torca**

La cuenca del canal Torca tiene un área de drenaje sanitario de 1.397 hectáreas y su eje principal cuenta con una longitud de 4,24 Km. desde el canal Serrezuela hasta el humedal Torca. Nace en los cerros orientales y desemboca al sistema humedal Torca-Guaymaral a altura de la

Expediente No. 25000-23-27-000-2001-0479-01  
Acumulados Nos. 2000-0428, 2001-0122, 2001-0343  
Actor: GUSTAVO MOYA ÁNGEL Y OTROS  
Acción Popular

Autopista Norte, en cercanía a los terrenos del cementerio Jardines de Paz.

El sistema troncal de drenaje se encuentra como un sistema separado, que tiene como ejes en la zona nororiental el drenaje de lluvias, que lleva hacia los humedales de Torca y Guaymaral, y a su vez drena al norte de la cuenca media del río Bogotá.

En la zona occidental la red de alcantarillado está conformada por:

a. Sistema sanitario: conformado por el interceptor del río Bogotá-Torca-Salitre, al cual llegan las aguas residuales y las conduce hasta la planta de tratamiento del Salitre.

b. Sistema pluvial: conformado por el canal El Cedro (que más adelante se llama el canal Torca), que recibe los canales San Cristóbal y Serrezuela, lleva después las aguas al humedal Torca, para posteriormente entregarlas a la cuenca media del río Bogotá.

**La principal fuente de contaminación en el Canal Torca corresponde a la red de alcantarillados (sanitarios, pluviales o ambas). Otra fuente de contaminación son las aguas de escorrentía provenientes de las canteras ubicadas en el costado nororiental de la ciudad.**

#### **Río Salitre o Juan Amarillo**

La cuenca del Salitre tiene un área de drenaje de 13.964 hectáreas, y está localizada en el sector centro-norte del Distrito Capital. El eje principal de esta cuenca tiene una longitud de 21,56 Km. y nace en los cerros orientales con el nombre de quebrada del Arzobispo. Al ingresar a la ciudad es canalizada desde el parque Nacional hasta el humedal Juan Amarillo; finalmente desemboca en el río Bogotá.

Hacen parte de esta cuenca las quebradas Delicias, La Vieja, La Chorrera, Cataluña, La Canadá, Luce, Moraji, Chico, Los Cerros, Los Rosales, entre otras. También hacen parte de

Expediente No. 25000-23-27-000-2001-0479-01  
 Acumulados Nos. 2000-0428, 2001-0122, 2001-0343  
 Actor: GUSTAVO MOYA ÁNGEL Y OTROS  
 Acción Popular

ella, los humedales Jaboque, Santa María del Lago, Córdoba y Juan Amarillo.

**Las principales fuentes de contaminación de esta corriente son aguas residuales domésticas. Cada uno de estos vertimientos aporta especialmente materia orgánica, Sólidos Suspendidos Totales (SST), Coliformes totales y E. Coli.**

#### **Río Fucha**

La cuenca del río Fucha comprende un área de 12.991 hectáreas urbanas y 4.545 hectáreas en la parte rural (correspondiente a los cerros orientales). Está localizada en el sector centro-sur del Distrito Capital, y drena las aguas de oriente a occidente para finalmente entregarlas al río Bogotá. El eje principal de drenaje de la cuenca tiene una longitud total de 24,34 Km., inicia en la zona suroriental de la misma donde recibe el nombre de río San Cristóbal. En este punto se encuentra con su cauce natural que toma dirección oriente occidente, hasta desembocar en el río Bogotá, en inmediaciones de la Zona Franca de Fontibón. Hace parte de esta cuenca los canales San Blas, Los Comuneros, Albina, Río Seco y las quebradas Finca, San José, La Pena, Los Laches, San Cristóbal, San Francisco, Santa Isabel, Honda, entre otras. Como ecosistemas asociados se encuentran los humedales de Techo, El Burro, La Vaca y Capellanía.

La red de alcantarillado de esta cuenca consta de tres sistemas (combinado, pluvial y sanitario) con una longitud existente de 1.787 km. La red combinada está localizada al oriente de la cuenca y drena, a través de los respectivos canales e interceptores, hacia un área donde el sistema está separado (pluvial y sanitario). **Las principales fuentes de contaminación de esta corriente son aguas residuales domésticas e industriales. Cada uno de estos vertimientos aporta especialmente materia orgánica, Sólidos Suspendidos Totales (SST), Coliformes totales y Coliformes Fecales (E. Coli).**

#### **Río Tunjuelo**

Expediente No. 25000-23-27-000-2001-0479-01  
Acumulados Nos. 2000-0428, 2001-0122, 2001-0343  
Actor: GUSTAVO MOYA ÁNGEL Y OTROS  
Acción Popular

El río Tunjuelo nace en el páramo de Sumapáz por encima de los 3.700 Msnm; el río Tunjuelo drena la zona sur de la ciudad hacia el río Bogotá, con una extensión de 28,27 Km., siendo su área de drenaje urbana 41.427 hectáreas y 4.237 hectáreas rurales.

El río Tunjuelo drena hacia el río Bogotá, siendo la subcuenca de mayor extensión (390 km<sup>2</sup>); en ella se asienta el 30% de la población de Bogotá. El sistema sanitario está compuesto principalmente por los interceptores Tunjuelo Medio -primera etapa, Comuneros- Lorenzo Alcatraz y Limas; las estaciones de bombeo Grancolombiano, Cartagenita e Isla Pontón San José que descargan al río Tunjuelo; en un futuro, entregaran al interceptor Tunjuelo-Canoas con descarga final a la planta de tratamiento de aguas residuales de Canoas (proyectada). El sistema pluvial del río Tunjuelo lo constituyen las quebradas Chiguaza, Limas, Yomasa, El Triángulo, El Zuque, Santa Librada, Juan Rey, La Pichosa, Moralvia, Nueva Delhi, Gaviotas, Zanjón de la Estrella y Trompeta; canales como San Carlos, San Vicente I y II; el sistema de amortiguación de crecientes (cuencas altas rural y urbana hasta San Benito) y la presa de Cantarana. **La principal fuente de contaminación en el río Tunjuelo es el vertido de aguas residuales domésticas e industriales.** En el Cuadro 1 se presenta la calidad del agua para condiciones de caudal promedio de los ríos urbanos, de acuerdo con los estudios realizados por EAAB y la SDA.

#### **Contaminación por vertimientos industriales.**

La presencia de contaminación industrial en las aguas de los tributarios urbanos al río Bogotá, fue evaluada por la SDA y la EAAB, en el estudio Calidad del sistema hídrico de Bogotá, realizado en el 2006. **Como resultado del estudio, se estableció la condición de los tributarios urbanos en relación con la presencia de metales pesados, contaminantes necesariamente asociados con vertimientos industriales.** En relación con la presencia de metales pesados el estudio estableció para cada uno de los tributarios:

Expediente No. 25000-23-27-000-2001-0479-01  
Acumulados Nos. 2000-0428, 2001-0122, 2001-0343  
Actor: GUSTAVO MOYA ÁNGEL Y OTROS  
Acción Popular

**Canal Torca:** En el canal Torca se observó que el plomo presentó la mayor concentración promedio (0,5 mg/l) respecto a las otras corrientes superficiales, debido a un evento atípico puntual que se presentó en el canal El Cedro (7,9 mg/l). Asimismo, se registró la presencia de zinc, manganeso y cromo total en valores bajos (trazas) que no superaron los límites establecidos por la normatividad para los objetivos de calidad y usos (Acuerdo 43 de 2006 de la CAR y Decreto 1594/84 del Ministerio de Agricultura).

**Río Salitre:** En el río Salitre el zinc registró la mayor concentración promedio (0,23 mg/l) con relación a los otros metales, y en el último tramo se presentó una concentración promedio (0,23 mg/l) que superó el valor referenciado para la preservación de la vida acuática (0,18 mg/l). Un comportamiento similar tuvo el cobre, con un valor promedio mayor (0,037 mg/l) que el límite establecido para el mismo uso (0,02 mg/l). Los otros metales presentaron concentraciones promedio de trazas que cumplen con la normatividad para todos los usos y para los objetivos de calidad.

**Río Fucha:** En el río Fucha, el plomo presentó la mayor concentración promedio respecto a los otros metales estudiados; esta tendencia se registró en todos los tramos y los valores superaron el límite establecido por la normatividad para uso y preservación de la vida acuática (IPMCA).

Las concentraciones promedio de cobre registraron mayores valores en los tres últimos tramos del río, respecto al límite referenciado para el uso de IPMCA (0,02 mg/l). Al comparar las concentraciones promedio de los metales se concluye que en esta corriente se presentaron las mayores concentraciones de zinc (0,23 mg/l), lo cual se asoció al sector productivo de metalmecánica (procesos de galvanoplastia, zincado de piezas metálicas).

**Río Tunjuelo:** En el río Tunjuelo, el cromo total presentó la mayor concentración promedio (0,2 mg/l) respecto a las otras corrientes

Expediente No. 25000-23-27-000-2001-0479-01  
Acumulados Nos. 2000-0428, 2001-0122, 2001-0343  
Actor: GUSTAVO MOYA ÁNGEL Y OTROS  
Acción Popular

superficiales y a los otros metales estudiados, esto debido a la presencia de curtiembres, las cuales se ubican en el tramo 4 donde descarga el interceptor Tunjuelo Medio que recoge las aguas residuales de San Benito. Los metales que registraron concentraciones mayores fueron el zinc y manganeso (0,17 mg/l), siendo el primero utilizado en la industria de recubrimientos metálicos y el segundo asociado a los residuos de la industria extractiva y de triturados para agregados. Además, se observa que la concentración promedio de manganeso fue mayor en el río Tunjuelo y que los otros metales estudiados mostraron valores menores de 0,2 mg/l.

**Río Bogotá Cuenca Media.** En el análisis del efecto de la contaminación de la ciudad de Bogotá y de la región en la cuenca media del río, el estudio concluyó: El zinc y el manganeso presentaron las mayores concentraciones promedio (0,19 y 0,13 mg/l, respectivamente); estos metales tienen origen en las aguas residuales generadas por el sector galvánico y de pinturas, entre otros. En relación con el manganeso, este metal puede estar presente en el río por la descarga de las aguas residuales de la industria química y por el uso de fertilizantes a base de sulfato de manganeso en cultivos de papa, en sectores por donde pasa la fuente superficial.

Para los otros metales se registraron valores menores de 0,1 mg/l. En la Figura 5 se presentan los resultados de los muestreos de metales pesados, en estas cuencas.

**En el canal Torca y en el río Salitre,** se aprecian los menores valores de carga contaminante de los metales analizados, y en los ríos Fucha y Tunjuelo se observa la influencia de diferentes sectores productivos ubicados en las áreas aferentes, tales como metalmecánica, químicas y curtiembres, respectivamente.

**Rio Bogotá Cuenca Baja.** La calidad del agua del río, en su cuenca baja es afectada por los vertimientos de aguas residuales domésticas de municipios que aún no cuentan con sistema de tratamiento (por ejemplo Tocaima, Apulo, etc.),

Expediente No. 25000-23-27-000-2001-0479-01  
 Acumulados Nos. 2000-0428, 2001-0122, 2001-0343  
 Actor: GUSTAVO MOYA ÁNGEL Y OTROS  
 Acción Popular

por la carga residual municipal de los efluentes de las Plantas de aguas Residuales - PTAR existentes (Anapoima, otros), la contaminación no puntual proveniente de las actividades agrícolas, siendo la más representativa el beneficio del café.

".....

### **Contaminación Municipal**

La contaminación originada en los municipios, es predominantemente de tipo orgánico, representada en los efluentes de las plantas de tratamiento de aguas de residuales (exceptuando a los municipios que no cuentan con PTAR que descargan sin tratamiento, caso Villapinzón), y de las descargas de áreas urbanas y suburbanas que no están conectadas o no disponen de red de alcantarillado. Dentro de estas cargas se cuenta la originada en los centros municipales para el beneficio de animales, algunos de los cuales disponen de sistema de pretratamiento. En el Cuadro 6 se indica la carga orgánica generada por los municipios de la cuenca, pero no relaciona la carga vertida al río actualmente.

La ciudad de Bogotá, con una población cercana a 7 millones de habitantes, es la principal fuente de contaminación orgánica al río.

### **Contaminación industrial**

i. Cuenca del río Bogotá, no incluye la ciudad de Bogotá.

En la cuenca del río Bogotá se han identificado cerca de 640 vertimientos, de los cuales el 70 por ciento corresponden a industrias (446 establecimientos), 10 por ciento son de origen agrícola y pecuario (68 establecimientos), 18 por ciento se identificaron como alcantarillados (115 emisarios) y el 2 por ciento son efluentes de Plantas de Tratamiento Municipales PTAR (11 instalaciones) 17.

De los 446 vertimientos de origen industrial, 166 son producidos por curtiembres de diferente tamaño, esta situación implica que el río Bogotá

Expediente No. 25000-23-27-000-2001-0479-01  
Acumulados Nos. 2000-0428, 2001-0122, 2001-0343  
Actor: GUSTAVO MOYA ÁNGEL Y OTROS  
Acción Popular

*recibe aguas residuales con alta concentración de sólidos, materia orgánica, nitrógeno, sulfuros y sales minerales, particularmente de sulfato de cromo y sulfuro de sodio.*

*Los vertimientos directos asociados con actividades agrícolas y pecuarias, 68 establecimientos, aportan al río de alta carga orgánica, nutrientes y contaminación bacterial.*

*ii. Ciudad de Bogotá.*

*En el perímetro urbano de la ciudad de Bogotá en el 2005, se registraron 2806 establecimientos industriales.*

*El en 2004 el DAMA registró, 2.487 establecimientos industriales en la ciudad, y una ocupación cercana a 175.000 empleados.*

*La carga contaminante mensual aportada por las industrias ubicadas en la ciudad de Bogotá en 2003, se estimó en 4.699 y 4.299 toneladas de DBO5 y SST respectivamente.*

*El caudal acumulado de los vertimientos industriales se estimó en el orden de 611 L/s.*

*En términos de población equivalente la carga industrial de la ciudad en el 2003, es igual a la producida por una población de 3 133 000 habitantes, asumiendo un aporte per cápita de 50 g/hab-d DBO5. Un factor de deterioro de gran importancia sobre el río, lo conforman el vertimientos de lixiviados de exceso no tratados provenientes del Relleno Sanitario Doña Juana, localizado en la zona alta del río Tunjuelo.*

*De acuerdo con el estudio VI Fase de Seguimiento de efluentes industriales y corrientes superficiales de Bogotá D.C. IDEAM. DAMA 2004, para el universo de actividades económicas caracterizadas en la ciudad de Bogotá, la contribución de carga industrial en términos de DBO5 y SST.*

*El efecto de la contaminación industrial de la ciudad al río, puede expresarse en términos de un indicador característico, la presencia de metales*

Expediente No. 25000-23-27-000-2001-0479-01  
 Acumulados Nos. 2000-0428, 2001-0122, 2001-0343  
 Actor: GUSTAVO MOYA ÁNGEL Y OTROS  
 Acción Popular

**pesados.** La presencia de metales pesados en los ríos urbanos tributarios al río Bogotá

De acuerdo con este estudio de forma acumula el río Bogotá recibe contaminación industrial expresada en términos de 51,62 toneladas por mes de metales pesados (cromo, zinc, plomo, otros); por lo cual se concluye sobre la importancia de fortalecer el control de la contaminación industrial en la ciudad" (Negrillas fuera de texto).

b. Modelación dinámica de la calidad del agua del río Bogotá -  
 Informe Producto 5 Universidad Nacional 2011

"Las conclusiones principales resumidas del presente informe son:

- El escenario planteado de tratamiento biológico de las efluentes de curtiembres y demás industrias de la Cuenca Alta, junto con la implementación de los PSMV definidos, todavía no oficialmente, para los municipios de la Cuenca Alta, se considera **NECESARIO**, para mantener condiciones aerobias en la corriente y condiciones favorables para potabilización y riego agrícola desde el Kilómetro 25 hasta el Kilómetro 85, justo aguas abajo de Tibitóc en la entrada del Río Negro.

- Bajo los escenarios modelados **no se alcanzará la Clase II planteada** para la parte alta de la Cuenca Alta del Río Bogotá, **antes del kilómetro 25 en Suesca y en toda la Cuenca Alta**, razón por la cual se recomienda este límite sea revisado por la autoridad ambiental CAR teniendo en cuenta los resultados del presente estudio.

- **No pueden, de acuerdo a la normatividad vigente, llevarse a cabo actividades de uso agrícola en la parte alta del Río antes de Suesca, ni después de la confluencia del Río Negro.** Solamente para los escenarios de condiciones favorables con tratamiento secundario en la PTAR Salitre y la PTAR Canoas se presenta en la Cuenca Baja, a la altura de Tocaima, la posibilidad de utilizar riego agrícola.

Expediente No. 25000-23-27-000-2001-0479-01  
Acumulados Nos. 2000-0428, 2001-0122, 2001-0343  
Actor: GUSTAVO MOYA ÁNGEL Y OTROS  
Acción Popular

- Los escenarios simulados en la Cuenca Alta y Media han hecho evidente la baja capacidad de asimilación de carga contaminante del Río. Se demuestra con los resultados obtenidos, que se debe implementar el máximo tratamiento posible y factible a todos los vertimientos de aguas residuales industriales y municipales efectuados sobre el río Bogotá y sus afluentes, tal como se ha realizado para condiciones favorables en este estudio. Es decir, es necesario llevar todos los vertimientos de la cuenca al máximo tratamiento posible.

- Además de tratamientos industriales y municipales en la Cuenca Alta definidos por los PSMV's a 2035, se considera necesario tratamiento terciario en la PTAR Salitre, y la eliminación de las conexiones erradas de aguas residuales a los río Salitre, Fucha y Tunjuelo, para devolver condiciones aerobias al Río Bogotá en la Cuenca Media. Esto solo será posible con una gran cruzada en la cual se considere a la Cuenca del Río Bogotá por parte del Gobierno Nacional y los Gobiernos Locales como Cuenca Prioritaria en el tema de saneamiento hídrico, y se incorpore en los Planes Maestro de Alcantarillado de cada municipio y la ciudad de Bogotá, la obligación de implementar sistemas de drenaje sostenibles de control local y regional.

- Los escenarios simulados de construcción de plantas de tratamiento secundario en los ríos Fucha y Tunjuelo no devuelven las condiciones aerobias a la corriente, ni en términos de calidad del agua estas opciones son mejores que la alternativa propuesta de tratamiento secundario en la PTAR Canoas de 14 metros cúbicos por segundo con desinfección. La alternativa adicional modelada del túnel de emergencia sin bombeo al embalse del Muña no se recomienda desde ningún punto de vista por los impactos negativos en la calidad del agua que se generan en la cuenca baja, además de otras implicaciones como los efectos de suspender el bombeo reportados por (Uniandes - EMGESA, 1996)" (Negrillas fuera de texto).

Expediente No. 25000-23-27-000-2001-0479-01  
 Acumulados Nos. 2000-0428, 2001-0122, 2001-0343  
 Actor: GUSTAVO MOYA ÁNGEL Y OTROS  
 Acción Popular

**c. Calidad del recurso hídrico de Bogotá 2011 - 2012. Secretaría de Ambiente de Bogotá**

"Dentro de todos los contaminantes monitoreados en los ríos, se encontró que en casi la totalidad de las muestras el arsénico, el mercurio y el cianuro fueron inferiores a los límites de detección (0,004 mg/L, 0,002 mg/L y 0,5 mg/L, respectivamente). En la tabla 6.1 se presenta la cantidad de datos dentro de la categoría "no detectables" y los que marcaron concentraciones superiores al límite de detección (casillas resaltadas en gris).

Se debe resaltar que en el 2012 los límites de detección de arsénico y de mercurio cambiaron; por lo tanto, las concentraciones de arsénico fueron < 0,007 mg/L, y las de mercurio, < 0,003 mg/L. Dentro del total de datos de arsénico, mercurio y cianuro, el 97%, el 100% y el 100%, respectivamente, están por debajo del límite de detección. Un comportamiento similar se presentó en los datos históricos, lo cual indica que **el agua de los ríos evaluados no presenta impacto alguno por contaminación con arsénico, mercurio o cianuro**. Es importante resaltar que no es común encontrar arsénico como elemento libre en aguas naturales, debido a que es poco soluble; por su parte, el mercurio tiende a acumularse en sedimentos en los cuerpos de agua superficial.

**6.1. Río Torca**

**Las concentraciones de la mayoría de contaminantes aumentaron a lo largo del río hasta el punto Jardines de Paz. El cambio más importante entre las concentraciones se dio entre Bosque de Pinos y Calle 161, especialmente en materia orgánica, sólidos, nutrientes, coliformes totales y fecales, manganeso y bario.** También se debe resaltar que hubo parámetros que permanecieron constantes en este sector del río (entre Bosque de Pinos y Calle 161), como pH, temperatura, cadmio, cinc, cromo y níquel, lo que permite pensar que los vertimientos aguas arriba de Calle 161 no presentan concentraciones

Expediente No. 25000-23-27-000-2001-0479-01  
Acumulados Nos. 2000-0428, 2001-0122, 2001-0343  
Actor: GUSTAVO MOYA ÁNGEL Y OTROS  
Acción Popular

importantes de dichos contaminantes que afecten la calidad natural del agua.

Por otro lado, **Calle 161 y Jardines de Paz** tendieron a registrar las máximas concentraciones de contaminantes, y constituyen los puntos críticos del río Torca. Entre Jardines de Paz y San Simón se observaron disminuciones en las concentraciones de contaminantes; el factor que mejora de cierta manera la calidad del agua en el río puede estar ligado a la dilución, a la depuración por parte del humedal o al efecto del buchón.

En comparación con los monitoreos históricos (2006-2007) y la fase 1 (2009-2010) las concentraciones en San Simón han tendido a disminuir, lo que puede indicar una dilución de los contaminantes, puesto que el caudal tuvo un aumento de entre el 55% y el 65% (tablas 6.2 y 6.3). De forma similar, en Bosque de Pinos la tendencia fue de disminución; sin embargo, está relacionada con el cambio del punto de monitoreo: durante los monitoreos históricos y la fase 1 el punto de referencia de calidad del río Torca era Canal El Cedro y a partir de la fase 2 (segundo semestre del 2010) este punto se cambió a Bosque de Pinos. Las grandes diferencias que se encontraron entre Canal El Cedro y Bosque de Pinos muestran que entre estos dos puntos hay aportes de aguas residuales con altos contenidos de materia orgánica y coliformes. Por lo tanto, el punto actual de monitoreo (Bosque de Pinos) se ajusta más a ser un referente de calidad del agua del río Torca.

Los puntos Calle 161 y Jardines de Paz han mostrado que entre la fase 2 (2010-2011) y la fase 3 (2011-2012) las condiciones del río han tendido a empeorar, especialmente en los parámetros de tipo 1 (tabla 6.2); sin embargo, es necesario robustecer la información de estos puntos para establecer una tendencia, ya que los caudales en estos dos periodos de monitoreo han tendido a ser altos, como reflejo de una temporada húmeda.

Expediente No. 25000-23-27-000-2001-0479-01  
Acumulados Nos. 2000-0428, 2001-0122, 2001-0343  
Actor: GUSTAVO MOYA ÁNGEL Y OTROS  
Acción Popular

**La calidad del río Torca estuvo entre excelente y marginal a lo largo de su recorrido por la ciudad;** dado que la calidad del agua en el tramo 1 fue excelente, no se encontró ningún parámetro crítico. Por el contrario, **en el tramo 2, los parámetros críticos fueron oxígeno disuelto, coliformes fecales y ntk;** esto muestra que el impacto de la calidad del agua está dado por las descargas de aguas residuales domésticas, las cuales se caracterizan por su alto contenido de coliformes y detergentes. **Comparando los resultados actuales con los periodos previos, se pudo establecer una mejoría en la calidad del agua del primer tramo y un deterioro en el segundo tramo, donde la categoría cambia de regular a marginal.**

#### 6.2. Río Salitre

**El río Salitre se encuentra en una cuenca mayoritariamente doméstica, donde los vertimientos de aguas residuales afectan la calidad del agua del río a lo largo de su recorrido por la ciudad. El primer punto de monitoreo (Parque Nacional) denota una buena calidad; sin embargo, a partir de la carrera 7ª, donde el río es canalizado, las descargas de las aguas residuales aumentan en gran medida las concentraciones de contaminantes.**

**Las concentraciones de la mayoría de contaminantes aumentaron a lo largo del río Salitre, hasta el punto Carrefour. Los cambios más importantes entre las concentraciones se presentaron entre Parque Nacional y Arzobispo, y entre Arzobispo y Calle 53. También se debe resaltar que hubo parámetros que permanecieron constantes, como pH, temperatura, cadmio, cromo total y manganeso, lo que permite pensar que los vertimientos de aguas residuales no presentan concentraciones importantes de dichos contaminantes que afecten la calidad natural del agua.**

**Por otro lado, en Calle 53 y Carrefour Avenida 68 se registraron algunas de las máximas concentraciones de los contaminantes, y son los puntos más susceptibles a descargas de**

Expediente No. 25000-23-27-000-2001-0479-01  
Acumulados Nos. 2000-0428, 2001-0122, 2001-0343  
Actor: GUSTAVO MOYA ÁNGEL Y OTROS  
Acción Popular

**contaminantes o están muy cercanos a zonas de mezcla.** Entre Carrefour y Transversal 91, las medianas de las concentraciones tendieron a disminuir, hecho relacionado con una dilución de los contaminantes, ya que aguas arriba de la transversal 91 se reciben las descargas del canal Córdoba y del Club Los Lagartos.

En general, los rangos de caudal para la mayoría de los puntos fueron superiores en la fase 2 (2010-2011) y la fase 3 (2011-2012), frente a los rangos de la fase 1 y los históricos, especialmente en Parque Nacional. **A pesar de la temporada húmeda, las concentraciones de los contaminantes tendieron a mantenerse constantes en el tiempo, y algunas aumentaron, como las de los coliformes fecales, los sólidos y el plomo.** Se debe resaltar que los metales fueron los parámetros que mayores disminuciones mostraron a lo largo del tiempo, especialmente el cobre (tablas 6.4 y 6.5). **Estos resultados ponen en evidencia la falta de obras de saneamiento en el río Salitre, ya que desde el 2006 el río viene manteniendo concentraciones de contaminantes muy similares a lo largo del tiempo, sin indicios de mejoras significativas.**

**En relación con el índice de calidad hídrica, la variación en la calidad del río se dio a partir del tramo 2, que pasó de una clasificación buena (en el tramo 1) a pobre, y se mantuvo de esta manera hasta el tramo 4.** En el tramo 1 se notó que el único parámetro crítico fue el pH, aunque los valores que no alcanzaron los objetivos no se alejaron lo suficiente para deteriorar la calidad del tramo, es posible que la condición natural del río tienda a valores bajos de pH. **En el tramo 2 se observó una mayor cantidad de parámetros críticos (coliformes fecales, sst, N<sub>total</sub> y GyA);** además, se notó que el punto Arzobispo presenta una mejor calidad que Calle 53. Por su parte, **en el tramo 3 los parámetros más críticos fueron coliformes fecales, GyA y ntk;** el primero de estos fue el parámetro que más veces excedió el objetivo de calidad. **Por último, en el tramo 4 los parámetros que con más frecuencia superaron los objetivos de calidad fueron oxígeno disuelto, coliformes fecales y ntk.** Dada la recurrencia de

Expediente No. 25000-23-27-000-2001-0479-01  
 Acumulados Nos. 2000-0428, 2001-0122, 2001-0343  
 Actor: GUSTAVO MOYA ÁNGEL Y OTROS  
 Acción Popular

los coliformes fecales en exceder los objetivos, la calidad pobre del río a partir del segundo tramo se puede atribuir a las descargas de aguas residuales domésticas. **En comparación con el WQI de periodos previos, se observó un comportamiento constante en la clasificación del tramo 1, pero los otros tramos mostraron deterioro: pasaron de categoría marginal a pobre, como consecuencia de un aumento en los datos que exceden los objetivos y de la lejanía de dichos datos con los objetivos de calidad.**

### 6.3. Río Fucha

**Para la fase 3 se observa que en la mayoría de los puntos de monitoreo del río Fucha el caudal superó lo obtenido en la fase 1 y en el periodo histórico. Esta variación se presentó en mayor proporción en los primeros cuatro puntos de monitoreo, cuya situación generó variaciones en las concentraciones de los diferentes parámetros a lo largo de las fases. En alcalinidad y dureza se presenta un comportamiento sin mayores variaciones a lo largo del tiempo, al igual que en los parámetros tomados en campo (pH, temperatura y conductividad). En El Delirio y en los últimos puntos de monitoreo, hay un comportamiento constante del oxígeno disuelto para todos los años de monitoreo. Situación contraria a la que se presentó en Carrera 7ª, Avenida del Ferrocarril y Avenida de Las Américas, pues la temporada de invierno afectó las concentraciones de oxígeno disuelto, ya que en las últimas dos fases (2010-2011 y 2011-2012) las medianas fueron las más altas.**

**En materia orgánica y sst, las diferentes condiciones hidrológicas en los monitoreos afectaron la dinámica de concentraciones. Así, para la fase histórica y la fase 1 las medianas fueron mayores, mientras que en las fases 2 y 3 las lluvias generaron dilución en las concentraciones. A pesar de lo anterior, los puntos de monitoreo, en su mayoría, no registraron cambios importantes (mayores al 30%) entre las diferentes fases, por lo que las variaciones que se observan son el resultado de la condición hidrológica del momento (tabla 6.6).**

Expediente No. 25000-23-27-000-2001-0479-01  
Acumulados Nos. 2000-0428, 2001-0122, 2001-0343  
Actor: GUSTAVO MOYA ÁNGEL Y OTROS  
Acción Popular

En relación con nutrientes, se observó que la fase 1 registró las mayores concentraciones, mientras que en la fase 2 (2010-2011) se registraron las menores concentraciones. En cuanto a grasas y aceites, se observó que la mayoría de puntos permanecieron sin cambios importantes, lo cual refleja las condiciones críticas de contaminación por grasas y aceites, especialmente en los últimos puntos de monitoreo del río. Para ntk es evidente el fuerte impacto causado por las descargas de agua residual a lo largo del río. Se confirmó el aumento de ntk respecto a los registros históricos, producto de la acumulación de este contaminante en el río. Para las últimas tres fases se observó un comportamiento constante en ntk.

En coliformes totales y fecales la tendencia es igualmente de aumento, consecuencia de la dinámica de las descargas de aguas residuales domésticas, pues las mayores concentraciones se detectan en monitoreos hechos en la mañana y en la tarde, mientras que las menores se registran en monitoreos de la noche o de la madrugada. En fenoles no es claro el comportamiento que tuvieron las concentraciones en la mayoría de puntos, pues se presentaron aumentos y disminuciones sin importar la condición hidrológica. A simple vista, durante la fase 1 se obtuvieron medianas más bajas y en la fase 2 las medianas fueron mayores. Para la fase 3, los registros se asemejaron a los datos históricos.

En cuanto al contenido de metales, se evidencia que en el punto de monitoreo Zona Franca se reportan las mayores concentraciones para todos los metales. Para bario, durante la fase 2 se obtuvieron las medianas más altas en Visión Colombia y Zona Franca. En zinc, se observó que para la mayoría de puntos las medianas de concentración disminuyeron respecto a los registros históricos (tabla 6.7). En cambio, en cobre, níquel y plomo, las concentraciones han aumentado en los últimos tres años de monitoreo; la fase 1 registró las mayores concentraciones no solo en cobre, sino en los demás metales. Con excepción del zinc, los otros metales

Expediente No. 25000-23-27-000-2001-0479-01  
Acumulados Nos. 2000-0428, 2001-0122, 2001-0343  
Actor: GUSTAVO MOYA ÁNGEL Y OTROS  
Acción Popular

monitoreados presentaron un comportamiento sin mayores variaciones.

**En relación con el wqi, el tramo 1 del río Fucha registra condiciones de muy buena calidad del agua, sin evidencia alguna de perturbaciones generadas por actividades antropogénicas. La calidad del agua en los últimos años ha permanecido constante y tiene posibilidades de aumentar a la máxima categoría del wqi. El tramo 2, que comprende el río en su entrada a la ciudad, se afecta de manera importante, pues el índice de calidad cae abruptamente a la categoría pobre, debido a los vertimientos de aguas residuales que agotan los niveles de oxígeno disuelto, en conjunto con un aumento en las cargas contaminantes, especialmente en sst y materia orgánica. A partir del tramo 3, parámetros como ntk, coliformes fecales y oxígeno disuelto, se alejaron aún más de los objetivos de calidad, ya que los contaminantes empezaron a acumularse debido a que el río Fucha ya no está en las capacidades de asimilar las cargas. El wqi para este tramo ha oscilado entre 46 y 57 unidades, y ha permanecido en la categoría marginal en los últimos años, acompañado de un ligero aumento en el valor wqi a partir del 2010. Como se ha aclarado, esto no quiere decir que la calidad del agua mejore con respecto al tramo 2, pues el cambio en el wqi es la respuesta de la calidad del tramo 3 con objetivos de calidad menos restrictivos. Finalmente, en el tramo 4 la categoría del wqi vuelve a caer a pobre; en este tramo, en los diferentes años evaluados el wqi ha variado entre 35 y 42 unidades. El índice de calidad más alto se obtuvo en el periodo 2010-2011, como reflejo del periodo de la predominancia de lluvias.**

#### **6.4. Río Tunjuelo**

**Por último, en el río Tunjuelo el caudal presenta un incremento constante y su aumento entre los puntos de monitoreo es causado por las numerosas descargas realizadas a lo largo del río. Sin embargo, los primeros dos puntos se ven drásticamente alterados por la operación del embalse La Regadera, el cual aumenta el caudal**

Expediente No. 25000-23-27-000-2001-0479-01  
Acumulados Nos. 2000-0428, 2001-0122, 2001-0343  
Actor: GUSTAVO MOYA ÁNGEL Y OTROS  
Acción Popular

hasta en tres órdenes de magnitud cuando se abren las compuertas, lo que a su vez modifica las concentraciones de los diferentes contaminantes en el agua. En el río Tunjuelo se presentó un comportamiento especial, ya que los primeros siete puntos (desde La Regadera hasta Makro Autosur) registraron los mayores caudales a lo largo de los diferentes periodos de monitoreo durante la fase 2. En los últimos tres puntos de monitoreo (desde Transversal 86 hasta Isla Pontón) se presentaron los mayores caudales durante la fase 3.

En general, los primeros puntos de monitoreo del río (La Regadera y uan) presentaron concentraciones bajas para los diferentes parámetros evaluados; el primer aumento de las concentraciones se presentó en Yomasa, debido al vertimiento de la quebrada del mismo nombre, en la cual se realizan descargas de agua residual doméstica. Los puntos críticos fueron Doña Juana (debido a los lixiviados provenientes del relleno sanitario y de las canteras que operan en la zona) y Transversal 86 (a causa de la descarga del interceptor Tunjuelo Medio), lo que se refleja en todos los parámetros evaluados. Por otro lado, en Barrio México se presentó disminución de las concentraciones, la cual se debió a los procesos de sedimentación y eutroficación que se llevan a cabo en la zona de minas inundadas (zmi) aguas arriba de este punto.

Solo el pH tuvo un comportamiento aproximadamente constante a lo largo de río. El oxígeno disuelto registró los mayores valores en la parte alta de la cuenca y decayó a partir de Doña Juana. Los parámetros que presentaron su mayor pico en Doña Juana fueron: dureza, sólidos, fósforo total, nitratos y nitritos; los que presentaron el pico principal en Transversal 86 fueron: conductividad, dbos, dco, grasas y aceites, coliformes totales, fenoles y nitrógeno amoniacal; los demás parámetros —como alcalinidad, ntk, nitrógeno total, ntk— presentaron sus mayores valores en Isla Pontón.

En el caso de los metales, todos presentaron su mayor concentración en Doña Juana, a excepción

Expediente No. 25000-23-27-000-2001-0479-01  
Acumulados Nos. 2000-0428, 2001-0122, 2001-0343  
Actor: GUSTAVO MOYA ÁNGEL Y OTROS  
Acción Popular

**del cromo**, cuyo pico más significativo se dio en Transversal 86; en el caso del cinc, cobre y cromo hubo aportes importantes en Transversal 86. Al evaluar las condiciones del río en el tiempo, se concluye que el mejor escenario se presentó durante la fase 2, cuando se obtuvieron menores concentraciones para los diferentes parámetros monitoreados, lo cual se asocia a que durante este periodo se presentaron los mayores caudales, lo que genera procesos de dilución. Las condiciones menos favorables se presentaron para los datos históricos y la fase 1, que en este caso se asocia con los bajos caudales registrados durante estos periodos. En las tablas 6.8 y 6.9 se encuentran registrados los cambios presentados en cada punto para todos los parámetros evaluados, respecto a los datos históricos y la fase 1.

Se analizó el wqi para un primer escenario con todos los datos y un segundo escenario con los datos cuando las compuertas de La Regadera estaban cerradas. Al evaluar los datos para el segundo escenario, la calidad del río fue mejor (buena) respecto a la obtenida para el escenario 1 (regular). Esto se debe al drástico aumento del caudal durante la apertura de las compuertas del embalse, el cual produce en este tramo del río procesos de resuspensión de partículas que afectan los parámetros evaluados.

A lo largo del trayecto del río se aprecia la **disminución en su calidad: se clasifica como marginal en el segundo tramo y como pobre en los últimos dos tramos, donde los vertimientos de tipo doméstico afectan significativamente la calidad del agua. Respecto a periodos anteriores, el tramo 1 para el escenario 1 se mantuvo constante frente al periodo anterior (regular) y presentó una desmejora frente al 2009-2010, cuando se clasificó bueno; en caso del escenario 2, el wqi se mantuvo constante respecto a los dos periodos anteriores (bueno). En cuanto a los últimos dos tramos, el wqi se clasificó como pobre durante todos los periodos, a excepción del tramo 3 durante 2010-2011, cuando se calificó como marginal; además, para este mismo periodo, el tramo 4 presentó un wqi mayor (aunque tuvo la**

Expediente No. 25000-23-27-000-2001-0479-01  
Acumulados Nos. 2000-0428, 2001-0122, 2001-0343  
Actor: GUSTAVO MOYA ÁNGEL Y OTROS  
Acción Popular

*misma calidad). Esta mejoría presentada en 2010-2011 está asociada a que durante este periodo se presentaron las precipitaciones más altas, las cuales generaron procesos de dilución de los contaminantes en el río que disminuyeron su concentración y, por lo tanto, afectaron de forma positiva el wqi*" (Negrillas fuera de texto).

- d. Informe de seguimiento cumplimiento objetivos de calidad para las nueve cuencas de segundo orden en la jurisdicción de la Car periodo 2012

"De acuerdo con lo establecido mediante el Acuerdo 43 de 2006, y los muestreos realizados por el Laboratorio Ambiental de la CAR durante el 2012, se realizó el análisis del cumplimiento de los objetivos de calidad sobre la corriente principal y los afluentes, obteniendo los resultados que se muestran en el presente capítulo para cada uno de los parámetros.

**DBO:** De acuerdo con los resultados obtenidos, el objetivo de calidad se incumple para DBO<sub>5</sub> en 10 puntos monitoreados sobre la corriente principal y en 10 puntos correspondientes a afluentes del río Bogotá..."

**SST:** De acuerdo con los resultados obtenidos, el objetivo se incumple para SST, en 36 puntos monitoreados sobre la corriente principal y en 16 puntos correspondientes a afluentes del río Bogotá..."

**OD:** De acuerdo con los resultados obtenidos, el objetivo de calidad en términos de oxígeno disuelto, se encuentra fijado para la clase I y II, en el tramo comprendido entre Villapinzón y aguas arriba de Termozipa, en el cual se cumple el valor mínimo fijado de 4 mg/l sobre la corriente principal, mientras que se incumple el objetivo fijado en la descarga del humedal Jaboque para los afluentes. Aunque en los tramos siguientes, no se fijó el parámetro de oxígeno disuelto como objetivo de calidad, se observa que este desciende hasta un valor de 0 mg/l hasta el Salto del Tequendama, donde vuelve a incrementar

Expediente No. 25000-23-27-000-2001-0479-01  
 Acumulados Nos. 2000-0428, 2001-0122, 2001-0343  
 Actor: GUSTAVO MOYA ÁNGEL Y OTROS  
 Acción Popular

por encima de 7 mg/l a descender progresivamente hasta 1 mg/l.

**COLIFORMES TOTALES:** De acuerdo con los resultados obtenidos, el objetivo se incumple para Coliformes Totales, en 34 puntos monitoreados sobre la corriente principal y en 19 puntos correspondientes a afluentes del río Bogotá..."

**NITRATOS:** De acuerdo con los resultados obtenidos, el objetivo se cumple para Nitratos, en todos los puntos monitoreados sobre el río Bogotá.

**Cromo VI:** De acuerdo con los resultados obtenidos, el objetivo se cumple para Cromo hexavalente en todos los puntos monitoreados sobre la corriente principal y sobre los afluentes de Bogotá. Se debe aclarar que en algunos casos no se pudo determinar el cumplimiento del objetivo de calidad, toda vez que el límite mínimo de detección del equipo utilizado para el análisis es de 0.02 mg/l y el valor establecido es de 0.01 mg/l.

Los parámetros descritos a continuación no fueron monitoreados por el laboratorio ambiental de la CAR, por lo tanto no fue posible realizar seguimiento:

Aluminio, Arsénico, Bario, Berilio, Boro, Cadmio, Cianuro Libre, Cinc, Cloro Total residual, clorofenoles, Cobalto, Cobre, Compuestos Fenólicos, Difenil, Difenil policlorados, Fenoles Monohídricos, Flúor, Grasas y aceites, Litio, Manganeseo, Mercurio, Molibdeno, Níquel, plaguicidas órgano clorados, plaguicidas órgano fosforados, plata, plomo, sales, selenio, sulfuro de hidrógeno, tensoactivos y vanadio" (Negrillas fuera de texto).

- **Conclusiones de la Sala sobre el diagnóstico del afluente:**

Para la Sala las condiciones hídricas del río Bogotá son reveladoras. Bogotá es una de las ciudades con mayores problemas en lo que se refiere a calidad hídrica. Las

Expediente No. 25000-23-27-000-2001-0479-01  
Acumulados Nos. 2000-0428, 2001-0122, 2001-0343  
Actor: GUSTAVO MOYA ÁNGEL Y OTROS  
Acción Popular

descargas de aguas residuales domésticas, pluviales, industriales y agropecuarias tienen impactos socioeconómicos, sobre los ecosistemas, la biodiversidad, sanitarios y de salubridad. La calidad del agua se ve alterada por vertimientos tanto legales como ilegales. Las nuevas urbanizaciones, los asentamientos marginales e ilegales, el mal uso del suelo, la mala disposición de basuras y escombros, entre otros, son muestra de ello.

Para entender con mayor precisión la situación de la cuenca, la Sala encuentra que la misma se divide en tres (3) de acuerdo a sus características físicas y problemáticas particulares. De los estudios transcritos se observa lo siguiente:

**a. Cuenca Alta**

La Sala encuentra que esta área se caracteriza por ser zona de abastecimiento y regulación de agua para varios Municipios y, propiamente, para el Distrito Capital, dado que además de encontrarse el nacimiento del río en el páramo de Guacheneque, en la jurisdicción del Municipio de Villapinzón, están los embalses del Neusa, Tominé, Sisga, Chingaza y San Rafael.

Los problemas más significativos están relacionados con la actividad de las curtiembres en Villapinzón y Chocontá, donde se queda sin oxígeno disuelto el río, como resultado de los vertimientos de materia orgánica producto del proceso de curtido de pieles y de la descarga de metales pesados y contaminantes peligrosos tales como cromo, sulfuros, grasas, bicarbonato.

Expediente No. 25000-23-27-000-2001-0479-01  
Acumulados Nos. 2000-0428, 2001-0122, 2001-0343  
Actor: GUSTAVO MOYA ÁNGEL Y OTROS  
Acción Popular

Las aguas servidas de los municipios que no cuentan con plantas de tratamiento de aguas residuales como Villapinzón, las descargas directas de las viviendas y conjuntos cerrados y las Ptar de los municipios que tienen problemas técnicos, de capacidad y operación, evidencian tal situación. En Tocancipá el cauce recibe la descarga de más de 150 industrias ubicadas aguas arriba de la bocatoma de Tibitoc.

Adicionalmente, las fuentes difusas como la mala disposición de residuos sólidos y la actividad agropecuaria contribuyen afectando su calidad.

Se resalta que no se puede, de acuerdo a la normatividad vigente, llevar a cabo actividades de uso agrícola en la parte alta del Río antes de Suesca, ni después de la confluencia del Río Negro. Se encontró la baja capacidad de asimilación de carga contaminante del Río.

#### **b. Cuenca media**

Como pudo analizar la Sala el problema principal de la cuenca media se relaciona con la descarga de los vertimientos domésticos e industriales de la ciudad de Bogotá a los diferentes ríos y quebradas de las subcuencas que conforman su territorio y que desembocan en el río Bogotá, además de los aportes sólidos originados de los procesos erosivos de los cerros orientales y a las malas prácticas de disposición de residuos en canales y sumideros. De las anteriores, la alteración fisicoquímica y biológica del río como

Expediente No. 25000-23-27-000-2001-0479-01  
Acumulados Nos. 2000-0428, 2001-0122, 2001-0343  
Actor: GUSTAVO MOYA ÁNGEL Y OTROS  
Acción Popular

consecuencia de las aguas servidas de la población del Distrito Capital se sobrepone a las otras.

En cuanto a la actividad industrial, se encuentra que el zinc y el manganeso presentaron las mayores concentraciones promedio; estos metales tienen origen en las **aguas residuales generadas por el sector galvánico y de pinturas**, entre otros. En relación con el manganeso, este metal puede estar presente en el río por la descarga de las **aguas residuales de la industria química y por el uso de fertilizantes a base de sulfato de manganeso en cultivos de papa**, en sectores por donde pasa la fuente superficial.

#### **c. Cuenca baja**

A partir de las compuertas de Alicachín los olores resultan ser ofensivos, el río llega en condiciones prácticamente anóxicas afectando el desarrollo socioeconómico de la zona, en especial los proyectos turísticos en municipios como La Mesa, Anapoima, San Antonio de Tequendama, Tocaima, entre otros, los cuales igual vierten sus aguas residuales. La contaminación no puntual proveniente de las actividades agrícolas, siendo la más representativa la del café.

La Sala resalta que este sector es el que menos beneficios tiene ya que el uso de sus aguas es prácticamente nulo dado que supera los niveles máximos y objetivos de calidad. Se conoce poco sobre los efectos de la contaminación en la salud de la población.

Expediente No. 25000-23-27-000-2001-0479-01  
Acumulados Nos. 2000-0428, 2001-0122, 2001-0343  
Actor: GUSTAVO MOYA ÁNGEL Y OTROS  
Acción Popular

**d. Contaminación Municipal en la cuenca hidrográfica:**

Según los informes, en la cuenca del río Bogotá se identificaron cerca de 640 vertimientos, de los cuales el 70 por ciento corresponden a industrias (446 establecimientos), 10 por ciento son de origen agrícola y pecuario (68 establecimientos), 18 por ciento se identificaron como alcantarillados (115 emisarios) y el 2 por ciento son efluentes de Plantas de Tratamiento Municipales PTAR (11 instalaciones).

De los 446 vertimientos de origen industrial, 166 son producidos por curtiembres de diferente tamaño, esta situación implica que el río Bogotá recibe aguas residuales con alta concentración de sólidos, materia orgánica, nitrógeno, sulfuros y sales minerales, particularmente de sulfato de cromo y sulfuro de sodio.

Los vertimientos directos asociados con actividades agrícolas y pecuarias, 68 establecimientos, aportan al río alta carga orgánica, nutrientes y contaminación bacteriana.

Particularmente sobre el **SISTEMA HÍDRICO DE BOGOTÁ** la Sala anota:

**i) Canal Torca:**

La fuente de contaminación más relevante son las aguas servidas de la población. Otra fuente de alteración son las aguas de escorrentía provenientes de las canteras ubicadas en el costado nororiental de la ciudad.

Expediente No. 25000-23-27-000-2001-0479-01  
Acumulados Nos. 2000-0428, 2001-0122, 2001-0343  
Actor: GUSTAVO MOYA ÁNGEL Y OTROS  
Acción Popular

Teniendo en cuenta el análisis realizado, en último estudio 2011 - 2012, las concentraciones de la mayoría de contaminantes aumentaron a lo largo del río hasta el punto Jardines de Paz. Se encontró cambio importante de las concentraciones entre Bosque de Pinos y Calle 161, especialmente en materia orgánica, sólidos, nutrientes, coliformes totales y fecales, manganeso y bario. Entre la calle 161 y Jardines de Paz tendieron a registrar las máximas concentraciones de contaminantes, y constituyen los puntos críticos del río Torca.

Se vislumbraron las grandes diferencias que se encontraron entre Canal El Cedro y Bosque de Pinos, lo cual muestra que entre estos dos puntos hay aportes de aguas residuales con altos contenidos de materia orgánica y coliformes.

Los puntos Calle 161 y Jardines de Paz mostraron que las condiciones del río han tendido a empeorar, no obstante se precisó que era necesario robustecer la información de estos puntos para establecer una tendencia, por cuanto los caudales en estos dos periodos de monitoreo han tendido a ser altos, como reflejo de una temporada húmeda.

Se concluyó que comparando los resultados actuales con los periodos previos, existe una mejoría en la calidad del agua del primer tramo y un deterioro en el segundo tramo, donde la categoría cambia de regular a marginal.

**ii) Río Salitre:**

Expediente No. 25000-23-27-000-2001-0479-01  
Acumulados Nos. 2000-0428, 2001-0122, 2001-0343  
Actor: GUSTAVO MOYA ÁNGEL Y OTROS  
Acción Popular

Las principales fuentes de contaminación de esta corriente son aguas residuales domésticas. Cada uno de estos vertimientos aporta especialmente materia orgánica, Sólidos Suspendidos Totales (SST), Coliformes totales y E. Coli.

Se precisó que el río Salitre se encuentra en una cuenca mayoritariamente doméstica, donde los vertimientos de aguas residuales afectan la calidad del agua del efluente a lo largo de su recorrido por la ciudad.

Según el informe el primer punto de monitoreo (Parque Nacional) denota una buena calidad; sin embargo, a partir de la carrera 7ª, donde el río es canalizado, las descargas de las aguas residuales aumentan en gran medida las concentraciones de contaminantes. Ciertamente, las concentraciones de la mayoría de contaminantes aumentaron a lo largo del río Salitre, hasta el punto Carrefour. Los cambios más importantes entre las concentraciones se presentaron entre Parque Nacional y Arzobispo, y entre Arzobispo y Calle 53.

Se dijo que a pesar de la temporada húmeda, las concentraciones de los contaminantes tendieron a mantenerse constantes en el tiempo, y algunas aumentaron, como las de los coliformes fecales, los sólidos y el plomo. Se resaltó que los metales fueron los parámetros que mayores disminuciones mostraron a lo largo del tiempo, especialmente el cobre.

Se plasmó que los resultados ponen en evidencia la falta de obras de saneamiento en el río Salitre, ya que desde

Expediente No. 25000-23-27-000-2001-0479-01  
Acumulados Nos. 2000-0428, 2001-0122, 2001-0343  
Actor: GUSTAVO MOYA ÁNGEL Y OTROS  
Acción Popular

el 2006 el río viene manteniendo concentraciones de contaminantes muy similares a lo largo del tiempo, sin indicios de mejoras significativas.

En relación con el índice de calidad hídrica, indicó que la variación en la calidad del río se dio a partir del tramo 2, que pasó de una clasificación buena (en el tramo 1) a pobre, y se mantuvo de esta manera hasta el tramo 4. En el tramo 2 se vio una mayor cantidad de parámetros críticos (coliformes fecales, sst, N<sub>total</sub> y GyA).

Se concluyó que en comparación con periodos previos, existe un comportamiento constante en la clasificación del tramo 1, pero los otros tramos mostraron deterioro: pasaron de categoría marginal a pobre, como consecuencia de un aumento en los datos que exceden los objetivos y de la lejanía de dichos datos con los objetivos de calidad.

**iii) Río Fucha:**

Las principales fuentes de contaminación de esta corriente son las aguas residuales domésticas e industriales. Cada uno de estos vertimientos aporta especialmente materia orgánica, Sólidos Suspendidos Totales (SST), Coliformes totales y Coliformes Fecales (E. Coli).

Siguiendo los estudios técnicos, en el sector conocido como El Delirio y en los últimos puntos de monitoreo, hay un comportamiento constante del oxígeno disuelto para todos los años de monitoreo; situación contraria a la que se presentó en la Carrera 7<sup>a</sup>, Avenida del Ferrocarril y

**Expediente No. 25000-23-27-000-2001-0479-01**  
**Acumulados Nos. 2000-0428, 2001-0122, 2001-0343**  
**Actor: GUSTAVO MOYA ÁNGEL Y OTROS**  
**Acción Popular**

Avenida de Las Américas, pues la temporada de invierno afectó las concentraciones de oxígeno disuelto, ya que en las últimas dos fases (2010-2011 y 2011-2012) las medianas fueron las más altas.

En relación con nutrientes, se observó que la fase 1 registró las mayores concentraciones, mientras que en la fase 2 (2010-2011) se encontraron las menores concentraciones.

En cuanto a grasas y aceites, se observó que la mayoría de puntos permanecieron sin cambios importantes, lo cual, según el informe, refleja las condiciones críticas de contaminación por grasas y aceites.

Se confirmó el aumento de ntk respecto a los registros históricos, producto de la acumulación de este contaminante en el río.

En cuanto a los coliformes totales y fecales, se precisó que la tendencia está igualmente en aumento, consecuencia de la dinámica de las descargas de aguas residuales domésticas, pues las mayores concentraciones se detectan en monitoreos hechos en la mañana y en la tarde, mientras que las menores se registran en monitoreos de la noche o de la madrugada.

En lo atinente al contenido de metales, se evidenció que en el punto de monitoreo Zona Franca se reportan las mayores concentraciones para todos los metales. En cobre, níquel y plomo las concentraciones aumentaron en los últimos tres años de monitoreo.

Expediente No. 25000-23-27-000-2001-0479-01  
Acumulados Nos. 2000-0428, 2001-0122, 2001-0343  
Actor: GUSTAVO MOYA ÁNGEL Y OTROS  
Acción Popular

iv) Río Tunjuelo:

La principal fuente de contaminación en el río Tunjuelo se refiere a la descarga de aguas residuales domésticas e industriales.

Estas últimas se caracterizan por haberse registrado niveles **de cromo como mayor concentración promedio esto debido a la presencia de curtiembres**, las cuales se ubican en el tramo 4 donde descarga el interceptor Tunjuelo Medio que recoge las aguas residuales de San Benito. Otros de los metales que registraron concentraciones mayores fueron el zinc y el manganeso siendo el primero utilizado en la **industria de recubrimientos metálicos** y el segundo asociado a los **residuos de la industria extractiva** y de triturados para agregados.

De acuerdo con los informes, el caudal presenta un incremento constante y su aumento entre los puntos de monitoreo es causado por las numerosas descargas realizadas a lo largo del río. Sin embargo, los primeros dos puntos se ven drásticamente alterados por la operación del embalse La Regadera, el cual aumenta el caudal hasta en tres órdenes de magnitud cuando se abren las compuertas, lo que a su vez modifica las concentraciones de los diferentes contaminantes en el agua.

Según se plasmó, el primer aumento de las concentraciones se presentó en Yomasa, debido al vertimiento de la

Expediente No. 25000-23-27-000-2001-0479-01  
Acumulados Nos. 2000-0428, 2001-0122, 2001-0343  
Actor: GUSTAVO MOYA ÁNGEL Y OTROS  
Acción Popular

quebrada del mismo nombre, en la cual se realizan descargas de agua residual doméstica. Los puntos críticos fueron Doña Juana (*debido a los lixiviados provenientes del relleno sanitario y de las canteras que operan en la zona*) y Transversal 86 (*a causa de la descarga del interceptor Tunjuelo Medio*).

Se concluyó que solo el pH tuvo un comportamiento aproximadamente constante a lo largo de río. El oxígeno disuelto registró los mayores valores en la parte alta de la cuenca y decayó a partir de Doña Juana. Los parámetros que presentaron su mayor pico en Doña Juana fueron: dureza, sólidos, fósforo total, nitratos y nitritos; los que presentaron el pico principal en Transversal 86 fueron: conductividad, dbos, dco, grasas y aceites, coliformes totales, fenoles y nitrógeno amoniacal; los demás parámetros –como alcalinidad, ntk, nitrógeno total– presentaron sus mayores valores en Isla Pontón.

En suma, se dijo que a lo largo del trayecto del río se aprecia la disminución en su calidad: se clasifica como marginal en el segundo tramo y como pobre en los últimos dos tramos, donde los vertimientos de tipo doméstico afectan significativamente la calidad del agua. Respecto a periodos anteriores, el tramo 1 para el escenario 1 se mantuvo constante frente al periodo anterior (regular) y presentó una desmejora frente al 2009-2010, cuando se clasificó bueno.

**Objetivo 3. Propender por la implementación y mejora de las condiciones de saneamiento básico**

Expediente No. 25000-23-27-000-2001-0479-01  
Acumulados Nos. 2000-0428, 2001-0122, 2001-0343  
Actor: GUSTAVO MOYA ÁNGEL Y OTROS  
Acción Popular

Estrategia: Adicionalmente para cumplir los objetivos de calidad propuestos en la cuenca, se deben realizar acciones y actividades para el aprovechamiento y mejoramiento de la infraestructura de saneamiento existente así como la ejecución de obras faltantes.

El objetivo se relaciona con las acciones en materia de saneamiento básico y manejo ambiental municipal en el marco de una solución técnica sostenible dentro de la gestión integral de la cuenca hidrográfica.

Es del caso recordar que las aguas residuales en su concepción amplia contienen una variedad de elementos y/o sustancias que alteran en menor o mayor grado su composición físico - química. En general, las aguas residuales contienen descargas residenciales, comerciales, agropecuarias e industriales, y pueden incluir porcentajes de aguas pluviales.

Los sistemas de alcantarillado que transportan las descargas de aguas residuales y aguas de precipitación son llamados sistemas de alcantarillado. Hoy día la mayoría de las ciudades recolectan y transportan esas aguas en sistemas separados o lo pretenden hacer.

El lugar de disposición de dichas aguas no es otro que las llamadas plantas de tratamiento de aguas residuales, en los lugares donde existan, por cuanto no todos los entes territoriales cuentan con ellas. En este sentido, los esquemas de aguas residuales se refieren al conjunto de elementos físicos y tecnológicos destinados a la recolección, conducción - transporte, disposición y tratamiento de aguas residuales.

Expediente No. 25000-23-27-000-2001-0479-01  
Acumulados Nos. 2000-0428, 2001-0122, 2001-0343  
Actor: GUSTAVO MOYA ÁNGEL Y OTROS  
Acción Popular

Concretamente, las instalaciones para el tratamiento de las aguas residuales urbanas constan de tres componentes principales:

- Recolección y conducción de las aguas residuales hasta la planta de tratamiento.
- Tratamiento propiamente dicho de las aguas residuales (tratamiento preliminar, tratamiento primario, secundario y terciario).
- Evacuación de los productos resultantes del tratamiento: efluentes depurados y lodos.

En este sentido, este acápite se concentra en la definición del esquema de tratamiento para la cuenca hidrográfica del río Bogotá, la ubicación de las plantas, el nivel de tratamiento requerido, la conveniencia de la construcción de una estación elevadora aguas abajo del río Tunjuelo para la generación eléctrica, la estandarización y optimización de los sistemas de tratamiento municipales, así como todo lo relacionado con los colectores, interceptores, conexiones erradas, rehabilitación de redes, entre otros.

En este contexto, los programas, planes y proyectos que incluye esta estrategia se dirigen a:

- Construcción de sistemas de tratamiento de aguas residuales.
- Construcción de plantas de tratamiento de aguas residuales.

Expediente No. 25000-23-27-000-2001-0479-01  
Acumulados Nos. 2000-0428, 2001-0122, 2001-0343  
Actor: GUSTAVO MOYA ÁNGEL Y OTROS  
Acción Popular

- Construcción de baterías sanitarias y pozos sépticos.
- Construcción de sistemas de tratamiento de mataderos municipales.
- Dragado y limpieza de cauces.

#### **1. Definición del esquema de tratamiento**

##### **1.1. Estudios realizados**

Para la definición del esquema de tratamiento en el marco de la solución técnica integral, la Sala encuentra que existen cuatro (4) estudios importantes realizados como fundamento del proyecto de descontaminación del río Bogotá, con su respectivo marco normativo expedido en cada etapa:

##### **1.1.1. Estudio Consorcio Hidroestudios - Black & Veatch (1985)**

###### **1.1.1.1. Alcance general:**

El objeto del estudio era la evaluación económica del proyecto de saneamiento del río Bogotá: en él se presentó el Tercer Plan Maestro de Alcantarillado para la ciudad de Bogotá, el cual incluyó 24 alternativas para el tratamiento del río, descartando el tratamiento en el embalse de El Muña y en Tocaima.

Se recomendó en dicho documento construir un interceptor hasta Canoas, una planta de tratamiento abajo del Tunjuelo y, avanzar en un programa de control de efluentes industriales a cargo de la empresa distrital.

Expediente No. 25000-23-27-000-2001-0479-01  
Acumulados Nos. 2000-0428, 2001-0122, 2001-0343  
Actor: GUSTAVO MOYA ÁNGEL Y OTROS  
Acción Popular

#### **1.1.1.2. Instrumentos de adopción de la alternativa seleccionada y propuesta**

Los resultados del estudio del Consorcio no fueron adoptados ni recogidos por instrumento alguno.

#### **1.1.2. Estudio elaborado por la firma Epam Ltda (1993)**

##### **1.1.2.1. Alcance general**

En 1992 se contrató por parte del Fondo Nacional de Desarrollo Económico - FONDAE a la firma EPAM Ltda. Para que realizara un estudio con el fin de definir la estrategia de saneamiento del Río Bogotá.

En el informe se abordaron cinco (5) aspectos:

- Caracterización del problema de contaminación del río Bogotá.
- Evaluación de los impactos ambientales y económicos de la contaminación
- Estandarización de las alternativas de saneamiento.
- Análisis técnico, ambiental, económico, financiero e institucional de las alternativas de saneamiento.
- Recomendación de una estrategia para el saneamiento del río.

##### **1.1.2.2. Resultados del estudio**

Del examen de todos los estudios y propuestas, se concluyó que las distintas alternativas para el saneamiento del río Bogotá se reducían a dos (2) grupos:

Expediente No. 25000-23-27-000-2001-0479-01  
Acumulados Nos. 2000-0428, 2001-0122, 2001-0343  
Actor: GUSTAVO MOYA ÁNGEL Y OTROS  
Acción Popular

- Conducir todas las aguas residuales urbanas a una planta única de tratamiento localizada aguas abajo de la ciudad (Canoas, Muña, Tocaima, etc.).
- Tratamiento de las aguas negras en plantas localizadas al final de las distintas cuencas de drenaje, especialmente en el Salitre, Fucha y Tunjuelo.

Por lo anterior y teniendo en cuenta los términos de referencia, el estudio se centró en el análisis de tres alternativas:

- Planta única al final de la Sabana (Canoas), con interceptor largo.
- Planta Única en Tocaima, con interceptores a lo largo del río en la sabana y desde el final de la cadena hidroeléctrica hasta la planta.
- Plantas múltiples en la sabana, al final de cada uno de los tres principales tributarios urbanos Salitre, Fucha y Tunjuelo.

Se seleccionó la última luego de una evaluación técnica - *ubicación y de facilidad de construcción y operación por etapas* -, ambiental - *por el análisis de la demanda bioquímica de oxígeno DBO y oxígeno disuelto en diferentes tramos* -, y económica - *comparación de costos de las estrategias* -.

La estrategia consistió en la construcción de tres (3) plantas de tratamiento primario y secundario de aguas residuales al final de las cuencas de los ríos Salitre, Fucha y Tunjuelo, localizadas antes de la confluencia con

Expediente No. 25000-23-27-000-2001-0479-01  
Acumulados Nos. 2000-0428, 2001-0122, 2001-0343  
Actor: GUSTAVO MOYA ÁNGEL Y OTROS  
Acción Popular

el río Bogotá, las cuales tendrían la capacidad de tratar las aguas provenientes de los sistemas de alcantarillado de las cuencas de drenaje de dichos afluentes.

**1.1.2.3. Instrumentos de adopción de la alternativa seleccionada y propuesta**

Dicha alternativa quedó incorporada en el Plan de Ordenamiento Territorial POT - **Decreto 619 de 2000** -, artículo 197:

*"El Sistema de Tratamiento de las aguas servidas, descrito en las intervenciones sobre la Estructura Ecológica Principal, recogerá a través de sus tres plantas de tratamiento localizadas cerca a las desembocaduras de los tres afluentes del río Bogotá, las aguas conducidas por los interceptores de todas las cuencas, reduciendo la materia orgánica y sedimentos entregados directamente por el sistema de alcantarillado en funcionamiento".*

**1.1.3. Estudio Elaborado por la Unión Temporal Saneamiento del río Bogotá - Water Research Center de Inglaterra Wrc Plcv y la Universidad de los Andes - (2001)**

**1.1.3.1. Alcance general**

En noviembre de 2001 la E.A.A.B. **contrató a la Unión Temporal Saneamiento del Río Bogotá, a Water Research Center de Inglaterra WRC PLCV y a la Universidad de los Andes con el fin de revisar las alternativas para el saneamiento de la Cuenca del Río.**

El informe parte de **dos (2) grandes opciones:**

Expediente No. 25000-23-27-000-2001-0479-01  
Acumulados Nos. 2000-0428, 2001-0122, 2001-0343  
Actor: GUSTAVO MOYA ÁNGEL Y OTROS  
Acción Popular

ESQUEMA AMPLIADO: La primera opción contempla la continuación del programa, esto es, con la construcción de tres (3) plantas de tratamiento primario y secundario en los tres afluentes del río Bogotá (Salitre, Fucha y Tunjuelo), llevadas a cabo en fases 1 y 2 para cada una de las plantas. Una variante de la alternativa era la de llevar el nivel de tratamiento hasta el Tratamiento Primario Químicamente Asistido (TPQA).

ESQUEMA ALTERNATIVO: La segunda opción propone la construcción de dos plantas, la ya construida del Salitre y una al sur de la ciudad - Tunjuelo o Canoas - considerando el nivel de tratamiento.

#### 1.1.3.2. Alcance de las alternativas propuestas en el estudio

- **Esquema ampliado:**

Para continuar con la estrategia de saneamiento, se planteó el siguiente escenario:

**Ampliación de la planta de tratamiento del Salitre:** Como se mencionó líneas atrás, la operación de la planta del Salitre en su fase I tiene un tratamiento primario con caudal medio de  $4\text{m}^3/\text{s}$ . El supuesto es que a largo plazo se pueda atender un caudal medio de  $6.5\text{m}^3/\text{s}$ , que al incluir la infiltración se tuviera un caudal medio en tiempo seco de  $9.0\text{m}^3/\text{s}$  y un caudal medio anual de  $10.8\text{m}^3/\text{s}$  con los aportes de las lluvias. Además se requiere la ampliación de la estación elevadora.

Expediente No. 25000-23-27-000-2001-0479-01  
Acumulados Nos. 2000-0428, 2001-0122, 2001-0343  
Actor: GUSTAVO MOYA ÁNGEL Y OTROS  
Acción Popular

**Construcción de la planta de Fucha:** La planta quedaría localizada en la margen izquierda del río en el sector denominado La Magdalena, cuyo suelo tiene destinación para el tratamiento de las aguas residuales según el POT. Atendería la cuenca de Fucha, la cuenca de Fontibón y el extremo norte del Tintal, que genera un caudal medio de  $6.5\text{m}^3/\text{s}$ , que al incluir la infiltración el caudal medio en tiempo seco sería de  $9.5\text{m}^3/\text{s}$  y un caudal medio anual de  $10.7\text{m}^3/\text{s}$  con los aportes de las lluvias, con una población de 3.5 millones de habitantes. La solución requeriría de una estación elevadora, la complementación del alcantarillado de la cuenca del Fucha y del extremo norte del Tintal para llevarlo a la planta, además de la construcción de un interceptor del Fucha.

**Construcción de la planta del Tunjuelo:** La planta quedaría localizada en el margen derecho del río en un sector dispuesto para uso especial en el POT. Atendería los sectores centro y sur de la cuenca de Tintal y la totalidad de las cuencas Tunjuelo y Soacha, que generan un caudal medio de  $5.1\text{m}^3/\text{s}$ , que al incluir la infiltración el caudal medio en tiempo seco sería de  $7.6\text{m}^3/\text{s}$  y un caudal medio anual de  $8.3\text{m}^3/\text{s}$  con los aportes de las lluvias, con una población de 4.3 millones de habitantes. La solución requeriría de una estación elevadora, de un interceptor paralelo al río Bogotá, desde el sector Tintal hasta la planta, así como un interceptor con flujo en sentido contrario al del río, el cual proviene de la zona de Soacha hacia la planta de Tunjuelo.

Expediente No. 25000-23-27-000-2001-0479-01  
Acumulados Nos. 2000-0428, 2001-0122, 2001-0343  
Actor: GUSTAVO MOYA ÁNGEL Y OTROS  
Acción Popular

***Variante tratamiento primario químicamente asistido:***

Sistema de tratamiento primario químicamente asistido el cual según precisa el informe cumpliría los mismos estándares de un sistema secundario por un costo significativamente menor, se recomienda su estudio.

***- Esquema alternativo***

Siempre se parte de la existencia de la planta de tratamiento de El Salitre.

El esquema alternativo plantea la implementación de una planta de tratamiento adicional a la del Salitre para atender las cuencas de Fucha, Tunjuelo, Tintal y Soacha, en lugar de dos plantas adicionales del esquema ampliado.

El esquema puede derivar a su vez en dos alternativas según la localización de la planta de tratamiento adicional que puede ser en lugares cercanos a la desembocadura del río Tunjuelo, o aguas más abajo en el sector Canoas en el Municipio de Soacha:

***Planta adicional en Tunjuelo:*** La planta quedaría localizada en el margen derecho del río en un sector dispuesto para uso especial en el POT. Atendería la totalidad de las cuencas Fucha, Tintal, Tunjuelo y Soacha, que generan un caudal medio de  $11.6\text{m}^3/\text{s}$ , que al incluir la infiltración el caudal medio en tiempo seco sería de  $17.1\text{m}^3/\text{s}$  y un caudal medio anual de  $19.0\text{m}^3/\text{s}$  con los aportes de las lluvias, con una población de 7.7 millones de habitantes. La solución requeriría la construcción del interceptor Fucha - Tunjuelo, paralelo

Expediente No. 25000-23-27-000-2001-0479-01  
Acumulados Nos. 2000-0428, 2001-0122, 2001-0343  
Actor: GUSTAVO MOYA ÁNGEL Y OTROS  
Acción Popular

al canal Cundinamarca, interceptor de Soacha en sentido contrario al flujo del río Bogotá. Se plantea la consideración que tenga un sistema de TPQA como otra alternativa viable.

**Planta adicional en Canoas:** La planta quedaría localizada entre la desembocadura del río Soacha y Alicachín, al final de la sabana de Bogotá, dentro del perímetro del Municipio. Atendería la totalidad de las cuencas Fucha, Tintal, Tunjuelo y Soacha, que generan un caudal medio de  $11.6\text{m}^3/\text{s}$ , que al incluir la infiltración el caudal medio en tiempo seco sería de  $17.1\text{m}^3/\text{s}$  y un caudal medio anual de  $19.0\text{m}^3/\text{s}$  con los aportes de las lluvias, con una población de 7.7 millones de habitantes. La solución requeriría además de la construcción del interceptor Fucha - Tunjuelo con pondaje en el sector de La Magdalena para amortiguar el caudal, interceptor Tunjuelo - Canoas paralelo al río Bogotá hasta entregar las aguas a la estación elevadora de Canoas, localizada en el sector del mismo nombre y luego la planta de tratamiento, así como el emisario Canoas - Alicachín que drenaría los efluentes hasta el sector de las compuertas de Alicachín.

#### **1.1.3.3. Resultados del estudio - alternativa seleccionada por la Unión Temporal Saneamiento río Bogotá**

La alternativa seleccionada corresponde a la de dos (2) plantas incluyendo la Ptar Canoas, su ventaja, señala el estudio, se deriva del hecho que aprovecha mejor el recurso natural de capacidad de asimilación que tiene el río Bogotá. Indica que la cuenca baja presenta gran capacidad de asimilación debido a la diferencia de nivel

Expediente No. 25000-23-27-000-2001-0479-01  
Acumulados Nos. 2000-0428, 2001-0122, 2001-0343  
Actor: GUSTAVO MOYA ÁNGEL Y OTROS  
Acción Popular

que tiene el perfil hidráulico del río, ya sea por el cauce del río o a través de las turbinas Pelton de la cadena generadora, que introducen gran cantidad de oxígeno disuelto que aún con las cargas contaminantes de Bogotá mantiene en condiciones aeróbicas todo el recorrido hasta su desembocadura en Girardot. En suma, **se recomendó el cambio del esquema del año 1993 por razones de costo, financiero, técnico y de tiempo.**

El análisis económico indicó que la alternativa más atractiva era la de dos plantas con Ptar en Salitre y Canoas, mientras que la menos favorable es la de tres plantas, la alternativa presenta menos costos en igualdad de beneficios y a su vez en igualdad de costos produce beneficios más rápidamente, se lograría el saneamiento de la cuenca media entre 6 y 9 años más temprano que con las otras alternativas. La alternativa seleccionada:

La alternativa propuesta fue la ampliación de la planta de tratamiento de El Salitre a 8 m<sup>3</sup>/s para el tratamiento de las aguas residuales generadas en la cuenca del río Salitre y adecuación TPQA, la recolección de las aguas generadas en las cuencas de los Ríos Fucha, Tintal, Tunjuelo y Soacha por medio de interceptores y el posterior tratamiento de las mismas en una planta localizada en el Municipio de Soacha, Vereda Canoas. Se plasmó que con la implementación y ejecución de esa alternativa se lograría la remoción de la carga contaminante proveniente de la cuenca media. Además, contemplaba:

- Construcción del interceptor Engativá - Cortijo.

Expediente No. 25000-23-27-000-2001-0479-01  
Acumulados Nos. 2000-0428, 2001-0122, 2001-0343  
Actor: GUSTAVO MOYA ÁNGEL Y OTROS  
Acción Popular

- Construcción del interceptor Fucha - Tunjuelo y la estación elevadora de Tunjuelo.
- Construcción del interceptor Tunjuelo - Canoas, la estación elevadora de Canoas y del interceptor Canoas - Alicachín.
- Construcción de la ptar Canoas.
- Intercepción de las aguas residuales que llegan a los canales de aguas lluvias.

**1.1.3.4. Instrumentos de adopción de la alternativa seleccionada y propuesta**

**POT - Decreto 469 de 2003:** El Distrito modificó el POT de la ciudad de Bogotá a través del Decreto 469 de 2003, en su artículo 106 modificatorio del artículo 60 del Decreto 619 de 2000, estableció el nuevo esquema de saneamiento del Río Bogotá, el cual tendría los siguientes componentes:

- Planta de tratamiento de aguas residuales del Salitre se adecuaría como una Planta de Tratamiento Primario Químicamente Asistido - TPQA.
- Se construiría los interceptores Engativá - Cortijo y Fucha - Tunjuelo y la estación elevadora de Tunjuelo.
- Se construiría el interceptor Tunjuelo - Canoas, la estación elevadora de Canoas, el interceptor Canoas - Alicachín y la Planta de tratamiento de Aguas Residuales de Canoas.

Expediente No. 25000-23-27-000-2001-0479-01  
Acumulados Nos. 2000-0428, 2001-0122, 2001-0343  
Actor: GUSTAVO MOYA ÁNGEL Y OTROS  
Acción Popular

- Sin perjuicio de lo anterior, en el párrafo 3º se incluyó el desarrollo del programa de tratamiento de los vertimientos del Río Bogotá que estaría sujeto al resultado de los estudios de viabilidad técnica y financiera que realizaría la Administración en el marco del Acuerdo Fundamental firmado el 6 de agosto de 2003 y los convenios interadministrativos que de éste se deriven, ente el Distrito y la Corporación Autónoma Regional de Cundinamarca.

**Sentencia de 25 de agosto de 2004 - Tribunal Administrativo de Cundinamarca objeto del recurso de alzada:** El 25 de Agosto de 2004 el Tribunal Administrativo de Cundinamarca falló en contra de algunas entidades del Gobierno Nacional, el Departamento de Cundinamarca, el Distrito Capital y algunas de sus entidades, municipios de la Cuenca y entidades privadas, por omisión en el control de los vertimientos de las aguas residuales al río y, el consecuente deterioro de la calidad ambiental de la Cuenca.

En la sentencia se ordenó que sea la "Mesa Regional" de la Cuenca la que apruebe cuándo y sobre qué aspectos se requiere adelantar nuevos estudios y a cargo de qué entidad o entidades correrán sus costos. Así mismo, el fallo establece que sólo se podrán modificar los pactos propuestos cuando el Tribunal Administrativo de Cundinamarca, con la aprobación de la "Mesa Regional" de la Cuenca del río Bogotá, autorice nuevas investigaciones y estudios que demuestren que la tecnología impone el desarrollo de otras obras que contribuyen a restaurar el medio ambiente con un mayor beneficio (relación costo -

Expediente No. 25000-23-27-000-2001-0479-01  
Acumulados Nos. 2000-0428, 2001-0122, 2001-0343  
Actor: GUSTAVO MOYA ÁNGEL Y OTROS  
Acción Popular

beneficio) y que implique una sola inversión en la que cada una de las entidades que participan en ella, puedan obtener sus mejores logros y beneficios.

De esta manera, dicha Corporación aprobó: la AMPLIACIÓN DE LA PLANTA DE TRATAMIENTO DEL SALITRE para tratar un efluente no inferior a una capacidad de 8 m<sup>3</sup>/s, la construcción de los INTERCEPTORES SALITRE-TUNJUELO, FUCHA-TUNJUELO, la ESTACIÓN ELEVADORA TUNJUELO, el INTERCEPTOR TUNJUELO-CANOAS, la ESTACIÓN ELEVADORA CANOAS, la PLANTA DE TRATAMIENTO CANOAS BAJO EL TRATAMIENTO PRIMARIO QUÍMICAMENTE ASISTIDO y con la capacidad para tratar el afluente que determine el MINISTERIO DE AMBIENTE, VIVIENDA Y DESARROLLO TERRITORIAL al conceder la respectiva licencia ambiental y, la construcción del INTERCEPTOR CANOAS ALICACHÍN. Además, precisó que el Distrito Capital -E.A.A.B. a largo plazo deberá proceder hacia el tratamiento terciario de las aguas tal y como se prescribe en la parte motiva de este fallo.

***Documento Conpes 3320 - Consejo Nacional de Política Económica y Social - Departamento Nacional de Planeación:***

A través del documento Conpes 3256 de 2003, se fijaron las Políticas y Estrategias para la Gestión concertada del Desarrollo de la Región Bogotá - Cundinamarca en el cual se plasmó que *"con relación al tema del Río Bogotá, el Gobierno Nacional en coordinación con las entidades territoriales e instituciones pertinentes, promoverá la formulación de un documento Conpes orientado a definir las acciones que se deben emprender desde los distintos niveles para descontaminación y manejo integral Río*

Expediente No. 25000-23-27-000-2001-0479-01  
Acumulados Nos. 2000-0428, 2001-0122, 2001-0343  
Actor: GUSTAVO MOYA ÁNGEL Y OTROS  
Acción Popular

Bogotá", lo que motivó la suscripción del Conpes 3320 en el año 2004.

En lo atinente a la definición de acciones a cada nivel institucional, en dicho documento se precisó:

Teniendo en cuenta el principio de política de sostenibilidad financiera, que resalta la importancia de la gradualidad en las inversiones, se recomienda un plan de acción en tres etapas:

- **Primera etapa (2004 - 2008):** se fundamenta en el desarrollo de planes de saneamiento básico de los municipios y en una intervención en el Embalse del Muña, que siendo factible, a corto plazo, genere un mejoramiento de las condiciones de vida de la población del Municipio de Sibaté. En esta etapa se trabajará para complementar la infraestructura de saneamiento básico, se establecerán estándares de calidad para los planes a mediano y largo plazo sobre la Cuenca, se diseñarán mecanismos financieros y se trabajará en la conformación de esquemas regionales, con el liderazgo de la Gobernación de Cundinamarca, la CAR, el MAVDT y el Distrito.
- **Segunda etapa (2009 - 2013):** se orienta a la continuación de las inversiones y al planteamiento de alternativas técnicas que optimicen y complementen las obras iniciadas en la primera etapa, de acuerdo con los objetivos de calidad, y teniendo en cuenta los resultados que se obtengan de los acercamientos iniciales, con especial atención al mejoramiento adicional sobre el Embalse del Muña

Expediente No. 25000-23-27-000-2001-0479-01  
Acumulados Nos. 2000-0428, 2001-0122, 2001-0343  
Actor: GUSTAVO MOYA ÁNGEL Y OTROS  
Acción Popular

y la población de Sibaté, y a los resultados sobre la Cuenca Baja, priorizando, en su orden, el acceso de la población a agua potable, redes de alcantarillado y tratamiento de aguas residuales.

- **Tercera etapa (2014-2020):** es una etapa de consolidación, seguimiento y evaluación para futuras intervenciones que permitan acceder a nuevos usos del Río Bogotá. En el Cuadro 2 se identificaron, de forma general, los proyectos destinados al mejoramiento de río, y que serán complementados, para cada caso en particular, con una evaluación técnica, económica y financiera para su posterior priorización de conformidad con los lineamientos definidos en el presente documento. En este sentido se incluyó:

| TIPO DE PROYECTO                      | POSIBLES FUENTES DE FINANCIACIÓN                              |
|---------------------------------------|---------------------------------------------------------------|
| BOGOTÁ                                |                                                               |
| Plan Maestro de Alcantarillado        | 30% SPG Agua Potable y Saneamiento Básico                     |
| Interceptores                         | Fondo Nacional de Regalías                                    |
| Ampliación estación elevadora Salitre | Tasas Retributivas                                            |
| Ampliación PTAR Salitre               | 7.5% Predial                                                  |
| Interceptor Tunjuelo - Canoas         | DAMA                                                          |
| Estación elevadora Canoas             | Tarifas alcantarillado ya incluidas en el plan de Inversiones |
| PTAR Canoas                           | Recursos crédito                                              |
| Manejo de humedales y dragado         | Recursos crédito                                              |

Expediente No. 25000-23-27-000-2001-0479-01  
Acumulados Nos. 2000-0428, 2001-0122, 2001-0343  
Actor: GUSTAVO MOYA ÁNGEL Y OTROS  
Acción Popular

**1.1.4. Modelación dinámica de la calidad del agua del río Bogotá -  
Producto 5 Determinación y simulación de escenarios y análisis de  
resultados (2011) - Contrato interadministrativo 9-07-26100-1059**

**1.1.4.1. Alcance general**

En el marco del Contrato Interadministrativo 9-07-26100-1059 de 2008, celebrado entre la Empresa de Acueducto y Alcantarillado de Bogotá - E.A.A.B. E.S.P. y la Universidad Nacional de Colombia, se acordó la entrega de siete (7) productos técnicos que permitirían alcanzar el objetivo general de llevar a cabo la modelación dinámica de calidad del agua del río Bogotá en su cuenca alta, media y baja, lo anterior en aras de que se pueda apreciar la capacidad de asimilación de la carga contaminante del río y determinar las condiciones del mismo en la actualidad y a futuro, todo lo anterior teniendo en cuenta las obras hoy proyectadas para el saneamiento del mismo.

Según el estudio con el modelo dinámico de calidad del agua validado y calibrado (Producto 4) es posible simular escenarios que permitan apoyar la toma de decisiones relativas a la implementación de obras de saneamiento del río Bogotá, la operación de plantas de tratamiento y manejo de vertimientos, la evaluación de impactos en la calidad del agua del río ante acciones como captaciones de agua y vertimientos de aguas lluvias y residuales.

El Producto 5 del Contrato, -Determinación y simulación de escenarios y análisis de resultados, tuvo como objetivos dos:

Expediente No. 25000-23-27-000-2001-0479-01  
Acumulados Nos. 2000-0428, 2001-0122, 2001-0343  
Actor: GUSTAVO MOYA ÁNGEL Y OTROS  
Acción Popular

- Efectuar la simulación de escenarios con el objetivo de recomendar acciones a corto, mediano y largo plazo para el mejoramiento de la calidad del río Bogotá.
- Contar con información detallada del comportamiento del río en el tiempo y ante el avance de las obras y tareas establecidas en el marco del Programa de Saneamiento del Río Bogotá.

Los escenarios simulados fueron definidos conjuntamente con la E.A.A.B. y otras entidades que tienen jurisdicción en la cuenca del río Bogotá.

#### **1.1.4.2. Resultados del estudio**

Las conclusiones principales del informe fueron:

- *"El escenario planteado de tratamiento biológico de las efluentes de curtiembres y demás industrias de la Cuenca Alta, junto con la implementación de los PSMV definidos, todavía no oficialmente, para los municipios de la Cuenca Alta, se considera NECESARIO, para mantener condiciones aerobias en la corriente y condiciones favorables para potabilización y riego agrícola desde el Kilómetro 25 hasta el Kilómetro 85, justo aguas abajo de Tibitóc en la entrada del Río Negro.*
- *"Bajo los escenarios modelados no se alcanzará la Clase II planteada para la parte alta de la Cuenca Alta del Río Bogotá, antes del kilómetro 25 en*

Expediente No. 25000-23-27-000-2001-0479-01  
Acumulados Nos. 2000-0428, 2001-0122, 2001-0343  
Actor: GUSTAVO MOYA ÁNGEL Y OTROS  
Acción Popular

Suesca y en toda la Cuenca Alta, razón por la cual se recomienda este límite sea revisado por la autoridad ambiental CAR teniendo en cuenta los resultados del presente estudio.

- "No pueden, de acuerdo a la normatividad vigente, llevarse a cabo actividades de uso agrícola en la parte alta del Río antes de Suesca, ni después de la confluencia del Río Negro. Solamente para los escenarios de condiciones favorables con tratamiento secundario en la PTAR Salitre y la PTAR Canoas se presenta en la Cuenca Baja, a la altura de Tocaima, la posibilidad de utilizar riego agrícola.
- "Los escenarios simulados en la Cuenca Alta y Media han hecho evidente la baja capacidad de asimilación de carga contaminante del Río. Se demuestra con los resultados obtenidos, que se debe implementar el máximo tratamiento posible y factible a todos los vertimientos de aguas residuales industriales y municipales, efectuados sobre el río Bogotá y sus afluentes, tal como se ha realizado para condiciones favorables en este estudio. Es decir, es necesario llevar todos los vertimientos de la cuenca al máximo tratamiento posible.

"Además de tratamientos industriales y municipales en la Cuenca Alta definidos por los PSMV's a 2035, se considera necesario tratamiento terciario en la PTAR Salitre, y la eliminación de las conexiones erradas de aguas residuales a los río Salitre, Fucha y Tunjuelo, para devolver condiciones aerobias al

Expediente No. 25000-23-27-000-2001-0479-01  
Acumulados Nos. 2000-0428, 2001-0122, 2001-0343  
Actor: GUSTAVO MOYA ÁNGEL Y OTROS  
Acción Popular

*Río Bogotá en la Cuenca Media. Esto solo será posible con una gran cruzada en la cual se considere a la Cuenca del Río Bogotá por parte del Gobierno Nacional y los Gobiernos Locales como Cuenca Prioritaria en el tema de saneamiento hídrico, y se incorpore en los Planes Maestro de Alcantarillado de cada municipio y la ciudad de Bogotá, la obligación de implementar sistemas de drenaje sostenibles de control local y regional.*

- *"Los escenarios simulados de construcción de plantas de tratamiento secundario en los ríos Fucha y Tunjuelo no devuelven las condiciones aerobias a la corriente, ni en términos de calidad del agua estas opciones son mejores que la alternativa propuesta de tratamiento secundario en la PTAR Canoas de 14 metros cúbicos por segundo con desinfección. La alternativa adicional modelada del túnel de emergencia sin bombeo al embalse del Muña no se recomienda desde ningún punto de vista por los impactos negativos en la calidad del agua que se generan en la cuenca baja, además de otras implicaciones como los efectos de suspender el bombeo reportados por (Uniandes - EMGESA, 1996)".*

#### **1.1.4.3. Instrumentos de adopción de la alternativa seleccionada y propuesta**

Los resultados de la modelación son utilizados para la planeación y toma de decisión por parte de la CAR. Se tuvieron en cuenta para la adopción de la estrategia que se plasmó en el documento Adecuación Hidráulica y Recuperación Ambiental del Río Bogotá.

Expediente No. 25000-23-27-000-2001-0479-01  
Acumulados Nos. 2000-0428, 2001-0122, 2001-0343  
Actor: GUSTAVO MOYA ÁNGEL Y OTROS  
Acción Popular

1.2. Análisis comparativo de alternativas del esquema de tratamiento de la cuenca - consejo de estado - incluye documento de modelación dinámica de la calidad del agua del río Bogotá (2011)

1.2.1. Síntesis de las alternativas del esquema de tratamiento de la cuenca, formuladas y seleccionadas por los diferentes consultores y entidades

**ALTERNATIVAS PLANTEADAS Y SELECCIONADAS POR EL SEGUNDO PLAN MAESTRO DE ALCANTARILLADO DE 1974**

**AUTOR: CONSORCIO CAMP DRESSER & MCKEE CEI Y PLANHIDRO**

Propusieron como esquema viable para la descontaminación del Río Bogotá, la construcción de una planta de aguas residuales a la altura de la población de Tocaima.

**ALTERNATIVAS PLANTEADAS Y SELECCIONADAS POR EL PLAN MAESTRO DE ALCANTARILLADO DE 1985**

**AUTOR: HIDROESTUDIOS - BLACK AND VEATCH**

**Nombre del estudio:** Diseños definitivos de la adecuación hidráulica del río Bogotá, las extensiones del plan maestro de alcantarillado y los estudios de tratamiento de aguas negras de la ciudad de Bogotá.

En relación con la conducción y el tratamiento de las aguas residuales, el plan maestro identificó 24 alternativas, las cuales fueron sometidas a un proceso de análisis y selección en varias etapas. En este proceso se descartaron las alternativas que contemplaban el tratamiento en el embalse de El Muña o en Tocaima, dejando solamente para el análisis final aquellas que consideraban el tratamiento en el área de la Sabana de

Expediente No. 25000-23-27-000-2001-0479-01  
Acumulados Nos. 2000-0428, 2001-0122, 2001-0343  
Actor: GUSTAVO MOYA ÁNGEL Y OTROS  
Acción Popular

Bogotá. Finalmente el plan seleccionó las siguientes cuatro mejores alternativas:

- **Alternativa C1:** construcción de dos plantas de tratamiento secundario al final de las cuencas de drenaje del Salitre y Tunjuelo, con un interceptor entre la cuenca de Torca y la planta del Salitre y la conducción de las aguas negras del Fucha y del Tintal hasta la planta del Tunjuelo.
- **Alternativa D1:** construcción de un interceptor de todas las aguas residuales urbanas a lo largo del río Bogotá y de una planta de tratamiento secundario total aguas abajo del río Tunjuelo.
- **Alternativa F1:** construcción de tres plantas de tratamiento a nivel secundario, una al final de cada una de las cuencas del Salitre, Fucha y Tunjuelo, con sus correspondientes sistemas colectores.
- **Alternativa H1:** construcción de dos plantas de tratamiento en Tunjuelo y Fucha, con un interceptor para la conducción de las aguas de Torca, Conejera, Jaboque, El Dorado y Salitre hasta la planta del Fucha.

Finalmente, el plan maestro seleccionó y recomendó la **alternativa D1**, esto es, la planta única al final de la Sabana, con un interceptor principal a lo largo del río.

Expediente No. 25000-23-27-000-2001-0479-01  
Acumulados Nos. 2000-0428, 2001-0122, 2001-0343  
Actor: GUSTAVO MOYA ÁNGEL Y OTROS  
Acción Popular

Diagrama de alternativas según el Consejo de Estado:

DIAGRAMA DE ALTERNATIVAS

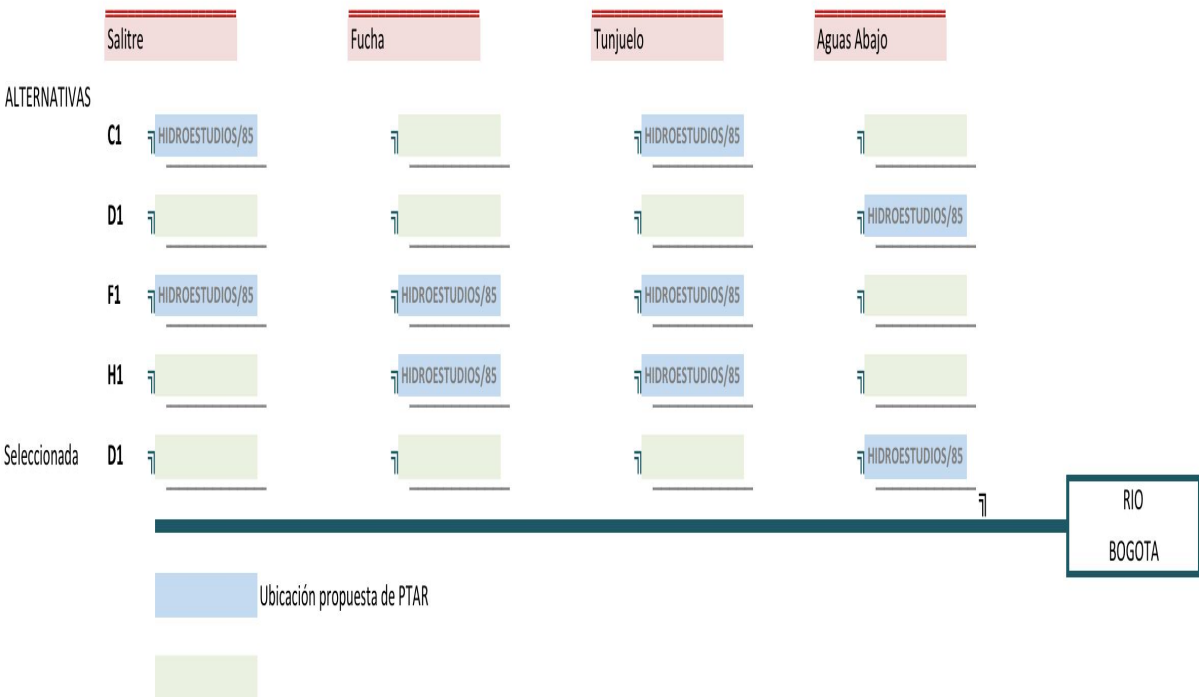

ALTERNATIVAS PLANTEADAS Y SELECCIONADAS POR EL ESTUDIO  
DEL PROYECTO PARA LA MEJORA DEL RÍO BOGOTÁ  
AUTOR: BIWATER 1988

El estudio desembocó en la identificación de un plan de desarrollo y en la preparación de una propuesta para la implantación de un proyecto sobre la base de una

Expediente No. 25000-23-27-000-2001-0479-01  
Acumulados Nos. 2000-0428, 2001-0122, 2001-0343  
Actor: GUSTAVO MOYA ÁNGEL Y OTROS  
Acción Popular

concesión. Como resultado de este estudio, la administración distrital solicitó propuestas técnico económicas a diferentes países reconocidos por su adelanto tecnológico en la materia, habiendo recibido las siguientes propuestas:

- **Biwater:** tres plantas, una en cada una de las tres principales cuencas de drenaje, a saber, Salitre, Fucha y Tunjuelo.
- **Degremont:** tres plantas, una en cada una de las tres principales cuencas de drenaje, a saber: Salitre, Fucha y Tunjuelo.
- **Dragados y construcciones:** cuatro plantas, una en cada una de las cuatro principales cuencas de drenaje, a saber: Torca, Salitre, Fucha y Tunjuelo

En conclusión el documento final planteó como solución óptima la construcción de tres plantas de tratamiento, una en la desembocadura del Salitre, otra en la del Fucha y la última en la del Tunjuelo, llegando hasta el nivel de tratamiento terciario con desinfección del efluente.

**ALTERNATIVAS PLANTEADAS Y SELECCIONADAS POR EL ESTUDIO  
PARA LA ESTRATEGIA DE SANEAMIENTO DEL RÍO BOGOTÁ  
AUTOR: EPAM LTDA. 1993. FONDO FINANCIERO DE PROYECTOS DE  
DESARROLLO "FONADE"**

Una vez analizados los antecedentes y estudios referidos en los numerales 1 y 2, se centró el análisis en tres alternativas:

Expediente No. 25000-23-27-000-2001-0479-01  
 Acumulados Nos. 2000-0428, 2001-0122, 2001-0343  
 Actor: GUSTAVO MOYA ÁNGEL Y OTROS  
 Acción Popular

- Planta única al final de la Sabana (Canoas), con interceptor a lo largo del Río.
- Planta única en Tocaima, con interceptores a lo largo del Río en la sabana y desde el final de la cadena hidroeléctrica hasta la planta.
- Plantas múltiples en la Sabana, al final de cada uno de los tres principales tributarios urbanos (Salitre, Fucha y Tunjuelo).

De acuerdo con este estudio, la estrategia de saneamiento recomendada consistía en la construcción escalonada de tres plantas de tratamiento de aguas residuales, ubicadas cerca de las desembocaduras de los ríos Salitre, Fucha y Tunjuelo sobre el río Bogotá.

Gráficamente la propuesta era la siguiente:

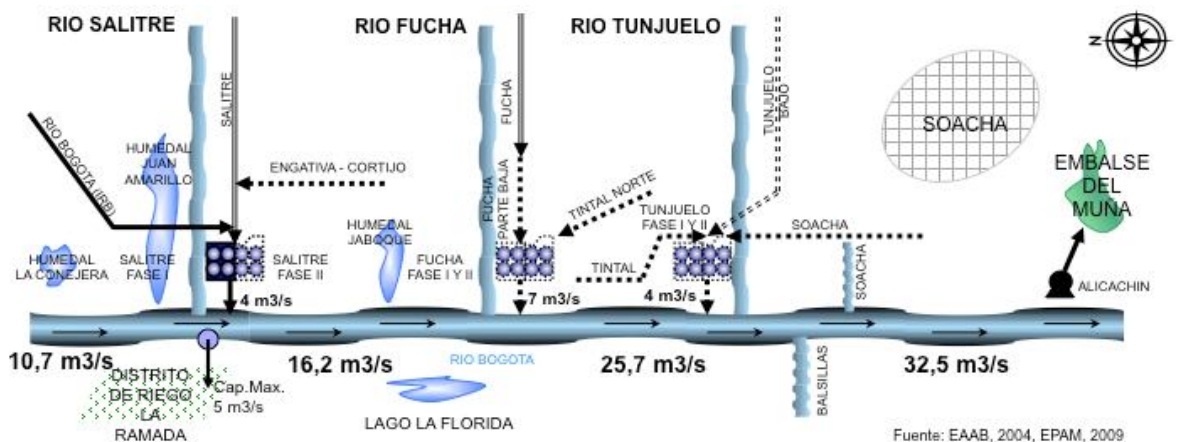

**ALTERNATIVAS PLANTEADAS Y SELECCIONADAS POR PROGRAMA DE SANEAMIENTO DEL RÍO BOGOTÁ - DEFINICIÓN DE LA ALTERNATIVA A SEGUIR**

**AUTOR: UNIÓN TEMPORAL SANEAMIENTO RÍO BOGOTÁ 2003**

Expediente No. 25000-23-27-000-2001-0479-01  
Acumulados Nos. 2000-0428, 2001-0122, 2001-0343  
Actor: GUSTAVO MOYA ÁNGEL Y OTROS  
Acción Popular

El estudio realizó una comparación de alternativas limitado a aquellas soluciones con nivel de tratamiento primario químicamente asistido para las tres disposiciones básicas a saber:

- Tres plantas de tratamiento cada una en la desembocadura de los ríos Salitre, Fucha y Tunjuelo, y demás estructuras complementarios.
- Dos plantas de tratamiento una en la desembocadura del río Salitre y otra en la desembocadura del Río Tunjuelo, y demás estructuras complementarias.
- Dos plantas de tratamiento una en la desembocadura del río Salitre y otra en el sitio Canoas en el Municipio de Soacha, y demás estructuras complementarios.

Del estudio se desprendió que la alternativa más atractiva, desde el punto de vista económico, era la de dos plantas con PTAR en Salitre y Canoas, mientras que la menos favorable era la de tres plantas. De acuerdo con el estudio, la alternativa de dos plantas, presentaba los menores costos en igualdad de beneficios y a su vez en igualdad de costos produce beneficios más rápidamente, siendo así que se logra el saneamiento de la cuenca media entre 6 y 9 años más temprano que con las otras alternativas.

La alternativa seleccionada consta de los siguientes componentes principales:

- Ampliación de la PTAR Salitre y adecuación a TPQA
- Construcción del interceptor Engativá - Cortijo

Expediente No. 25000-23-27-000-2001-0479-01  
 Acumulados Nos. 2000-0428, 2001-0122, 2001-0343  
 Actor: GUSTAVO MOYA ÁNGEL Y OTROS  
 Acción Popular

- Construcción del interceptor Fucha - Tunjuelo y de la estación elevadora de Tunjuelo
- Construcción del interceptor Fucha - Tunjuelo, la estación elevadora de Canoas y del interceptor Canoas - Alicachín
- Construcción de la PTAR Canoas

Gráficamente la propuesta era la siguiente:

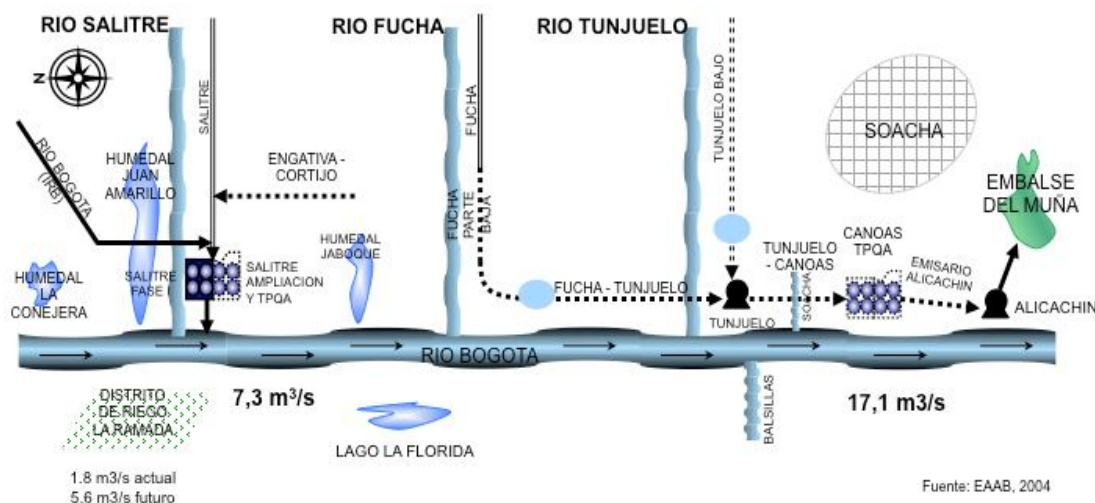

#### ALTERNATIVAS PLANTEADAS Y SELECCIONADAS POR EL ESTUDIO MODELACIÓN DINÁMICA DE LA CALIDAD DEL AGUA DEL RÍO BOGOTÁ - 2011

AUTOR: DEPARTAMENTO DE INGENIERÍA CIVIL Y AGRÍCOLA  
 LABORATORIO DE ENSAYOS HIDRÁULICOS. UNIVERSIDAD NACIONAL  
 DE COLOMBIA. INFORME PRODUCTO NO. 5 DETERMINACIÓN Y  
 SIMULACIÓN DE ESCENARIOS Y ANÁLISIS DE RESULTADOS

Con el desarrollo de este estudio se llevó a cabo la modelación dinámica de calidad del agua del Río Bogotá en su cuenca alta, media y baja, con el fin de estimar la capacidad de asimilación de carga contaminante del Río y

Expediente No. 25000-23-27-000-2001-0479-01  
Acumulados Nos. 2000-0428, 2001-0122, 2001-0343  
Actor: GUSTAVO MOYA ÁNGEL Y OTROS  
Acción Popular

determinar las condiciones del Río en la actualidad y a futuro, contemplando las obras hoy proyectadas para el saneamiento del mismo.

Con el modelo dinámico de calidad del agua elaborado, se simularon escenarios para apoyar la toma de decisiones relativas a la implementación de obras de saneamiento del Río Bogotá, la operación de plantas de tratamiento y manejo de vertimientos, la evaluación de impactos en la calidad del agua del río ante acciones como captaciones de agua y vertimientos de aguas lluvias y residuales.

Entre otros el estudio analizó los siguientes escenarios pertenecientes a las Cuencas Media y Baja:

#### Condiciones actuales

- Escenario 1. Condiciones actuales.
- Escenario 2. Salitre TS Canoas TP
- Escenario 3. Salitre TS Canoas TS (Desinfección)
- Escenario 4. Salitre TS Canoas TS (Desinfección) y sin T
- Escenario 5. Salitre TS Canoas TS y TP (Desinfección)

#### Condiciones críticas

- Escenario 6. Condiciones actuales.
- Escenario 7. Salitre TS Canoas TP
- Escenario 8. Salitre TS Canoas TS (Desinfección)
- Escenario 9. Salitre TS Canoas TS (Desinfección) y sin T

Expediente No. 25000-23-27-000-2001-0479-01  
Acumulados Nos. 2000-0428, 2001-0122, 2001-0343  
Actor: GUSTAVO MOYA ÁNGEL Y OTROS  
Acción Popular

- Escenario 10. Salitre TS Canoas TS y TP  
(Desinfección)

#### Condiciones favorables

- Escenario 11. Condiciones actuales.
- Escenario 12. Salitre TS Canoas TP
- Escenario 13. Salitre TS Canoas TS (Desinfección)
- Escenario 14. Salitre TS Canoas TS (Desinfección) y  
sin T
- Escenario 15. Salitre TS Canoas TS y TP  
(Desinfección)

#### Otras alternativas

- Escenario 17. Plantas en Salitre, Fucha y Tunjuelo
- Escenario 18. Plantas en Salitre, Fucha y Tunjuelo
- Escenario 19 Planta en Tunjuelo TP
- Escenario 20 Planta en Tunjuelo TPQA
- Escenario 21 Planta en Tunjuelo TS

De los escenarios analizados y con relación a las alternativas de construcción de la PTAR, el estudio menciona lo siguiente:

Se considera necesario tratamiento terciario en la PTAR Salitre, y la eliminación de las conexiones erradas de aguas residuales a los río Salitre, Fucha y Tunjuelo, para devolver condiciones aerobias al Río Bogotá en la Cuenca Media.

Expediente No. 25000-23-27-000-2001-0479-01  
Acumulados Nos. 2000-0428, 2001-0122, 2001-0343  
Actor: GUSTAVO MOYA ÁNGEL Y OTROS  
Acción Popular

Los escenarios simulados de construcción de plantas de tratamiento secundario en los ríos Fucha y Tunjuelo no devuelven las condiciones aerobias a la corriente, ni en términos de calidad del agua estas opciones son mejores que la alternativa propuesta de tratamiento secundario en la PTAR Canoas de 14 metros cúbicos por segundo con desinfección.

Expediente No. 25000-23-27-000-2001-0479-01  
 Acumulados Nos. 2000-0428, 2001-0122, 2001-0343  
 Actor: GUSTAVO MOYA ÁNGEL Y OTROS  
 Acción Popular

### 1.2.2. Diagrama de alternativas según el Consejo de Estado

#### DIAGRAMA DE ALTERNATIVAS

|                |      | Salitre        | Fucha          | Tunjuelo       | Aguas Abajo    | Observaciones                    |
|----------------|------|----------------|----------------|----------------|----------------|----------------------------------|
| ALTERNATIVAS   | AÑO  |                |                |                |                |                                  |
| Camp Dresser   | 1974 | ☐ -            | ☐ -            | ☐ -            | TOCAIMA        |                                  |
| Black & Veatch | 1985 | ☐ -            | ☐ -            | ☐ -            | CANOAS         |                                  |
| Biwater        | 1988 | ☐ T.TERCARIO   | ☐ T.TERCARIO   | ☐ T.TERCARIO   | ☐ -            |                                  |
| Epam           | 1993 | ☐ T.SECUNDARIO | ☐ T.SECUNDARIO | ☐ T.SECUNDARIO | ☐ -            |                                  |
| Union Temporal | 2003 | ☐ TPQA         | ☐ -            | ☐ -            | ☐ TPQA         |                                  |
| UNAL           | 2011 | ☐ T.TERCARIO   | ☐ -            | ☐ -            | ☐ T.SECUNDARIO | Desinfección en Tunjuelo         |
| Estado actual  | 2013 | ☐ T.SECUNDARIO | ☐ -            | ☐ -            | ☐ -            | Incluye actividades en ejecución |

Ubicaciones propuestas para PTAR

RIO  
BOGOTA

Expediente No. 25000-23-27-000-2001-0479-01  
Acumulados Nos. 2000-0428, 2001-0122, 2001-0343  
Actor: GUSTAVO MOYA ÁNGEL Y OTROS  
Acción Popular

**1.2.3. Análisis discriminante y por descarte de alternativas de esquema de tratamiento de la cuenca**

Teniendo en cuenta los estudios, análisis y modelaciones recopilados en los numerales anteriores y que obran en el proceso según se relacionó en el acápite pruebas de esta sentencia, la Sala realizó un análisis discriminante y por descarte de alternativas de la solución técnica y de saneamiento del Río Bogotá más favorable, lo anterior partiendo de las conclusiones de cada uno de los documentos técnicos obrantes en el plenario, además en el marco de aspectos económicos, técnicos, constructivos, de conveniencia, el estado actual de las obras, el grado de tratamiento propuesto y requerido y la ubicación. Para los efectos anteriores se siguió el diagrama de alternativas elaborado por esta Corporación.

**PRIMERA ELIMINACIÓN DE ALTERNATIVAS**

La alternativa de planta única en Tocaima se descarta, en consideración a que no ofrece una solución al embalse del Muña y no permite eliminar las consecuencias negativas en el sistema de generación hidroeléctrico, como se explicará en detalle en numerales posteriores.

Además, no es posible considerar las soluciones que plantean la construcción de plantas únicas, en primer lugar por cuanto en la actualidad ya se encuentra construida la PTAR Salitre la cual no tiene la capacidad para tratar la totalidad de los vertimientos provenientes de la cuenca media. Tampoco se puede contemplar la alternativa de plantas únicas en Tocaima y Canoas por la misma razón.

Por consiguiente se descartan las siguientes alternativas:

| Alternativa        | Consultor    |
|--------------------|--------------|
| PTAR única Tocaima | Camp Dresser |

Expediente No. 25000-23-27-000-2001-0479-01  
Acumulados Nos. 2000-0428, 2001-0122, 2001-0343  
Actor: GUSTAVO MOYA ÁNGEL Y OTROS  
Acción Popular

|                   |                |
|-------------------|----------------|
| PTAR única Canoas | Black & Veatch |
|-------------------|----------------|

**SEGUNDA ELIMINACIÓN DE ALTERNATIVAS**

Los análisis económicos adelantados por la Unión Temporal Saneamiento Río Bogotá, indican que la alternativa más atractiva es la de dos plantas con PTAR en Salitre, y otra, aguas abajo, mientras que la menos favorable es la de tres plantas.

Siguiendo las recomendaciones del estudio adelantado por la Universidad Nacional referido, los escenarios simulados de construcción de plantas de tratamiento secundario en los ríos Fucha y Tunjuelo no devuelven las condiciones aerobias a la corriente, ni en términos de calidad del agua estas opciones son mejores que la alternativa propuesta de tratamiento secundario en la PTAR aguas abajo de 14 metros cúbicos por segundo con desinfección.

En términos de conveniencia se requeriría la modificación de los instrumentos normativos vigentes, de los compromisos y acuerdos suscritos, de la licencia ambiental, entre otros, para que se pudiera realizar esta alternativa, los tiempos se prolongarían en más de 5 años - *trámites administración y de ejecución construcción* -.

Adicionalmente y en consideración a que ya se ha adelantado la construcción de buena parte del sistema de interceptores proyectados dentro del programa de saneamiento del río Bogotá, en especial los interceptores Fucha - Tunjuelo y Tunjuelo - Canoas, y Túnel de Emergencia diseñados para recoger y transportar a cerca de dos tercios de las aguas residuales generadas por la ciudad a una planta proyectada aguas abajo, esto constituye una limitante debido a las grandes inversiones involucradas, evitando con lo anterior

Expediente No. 25000-23-27-000-2001-0479-01  
Acumulados Nos. 2000-0428, 2001-0122, 2001-0343  
Actor: GUSTAVO MOYA ÁNGEL Y OTROS  
Acción Popular

que se incurra en detrimento patrimonial para la Nación -  
*razones económicas de descarte* -

Por consiguiente se descartan las siguientes alternativas:

| Alternativa                                 | Consultor |
|---------------------------------------------|-----------|
| Sendas PTAR en Salitre, Fucha<br>y Tunjuelo | Biwater   |
| Sendas PTAR en Salitre, Fucha<br>y Tunjuelo | EPAM      |

**1.2.4. Alternativa de esquema tratamiento seleccionado**

Como conclusión, las alternativas que prevalecen son aquellas que prevén dos (2) plantas de la siguiente forma y con el siguiente esquema:

- **Ampliación de la actual PTAR el Salitre en caudal y capacidad de tratamiento.**
- **Construcción de una segunda planta aguas abajo de la desembocadura del río Tunjuelo sobre el río Bogotá.**

La ubicación precisa de la segunda PTAR y el nivel de tratamiento, se analizan en los dos siguientes acápite, de acuerdo con las evaluaciones y análisis de detalle recopilados.

En cuanto al esquema de saneamiento seleccionado, la Sala considera que resulta ser la mejor alternativa teniendo en cuenta los múltiples beneficios debidamente soportados en los diferentes estudios contratados y realizados desde hace más de 20 años, los cuales fueron allegados al proceso y relacionados en el acápite de pruebas.

Expediente No. 25000-23-27-000-2001-0479-01  
Acumulados Nos. 2000-0428, 2001-0122, 2001-0343  
Actor: GUSTAVO MOYA ÁNGEL Y OTROS  
Acción Popular

En efecto, con la selección de la alternativa de las dos plantas - Salitre ampliado y optimizado - y una Ptar aguas abajo, las ventajas resultan irrefutables:

#### **PTAR EL SALITRE**

La Planta de Aguas Residuales el Salitre es la instalación de saneamiento a través de la cual se tratan las aguas servidas de la zona norte de Bogotá, que se conducen por el alcantarillado, colectores e interceptores que confluyen en la cuenca del Salitre, lo anterior mediante un sistema de tratamiento primario químicamente asistido - TPQA.

Con la optimización y ampliación de la Ptar Salitre se lograría el tratamiento de las aguas residuales del río Salitre y de las cuencas Torca y Jaboque, produciendo un efluente que cumpla con los estándares de calidad requeridos - 30mg/l de SST y 30mg/l de DBO<sub>5</sub> promedios mensuales, lo que significaría la remoción de 80 a 85% de la carga contaminante; lo anterior cobra relevancia por sí sola si se compara con la situación actual de la planta, esto es, para el caudal medio de 4m<sup>3</sup>/s el promedio de remoción mensual es de 60% de SST y 40% de DBO<sub>5</sub>.

Para la Sala resulta importante recalcar que la Corporación Autónoma Regional de Cundinamarca dentro de la estrategia de saneamiento integral de la cuenca hidrográfica, estructuró el proyecto de Adecuación Hidráulica y Recuperación Ambiental del Río Bogotá, dando cumplimiento a las competencias asignadas por la Ley 99 de 1993, en relación con i) la promoción y ejecución de obras de irrigación, avenamiento, defensa contra las inundaciones, regulación de cauces y corrientes de agua, y de recuperación de tierras que sean necesarias para la defensa, protección y adecuado manejo de cuencas hidrográficas - artículo 31, numeral 19 - y ii) ejecución, administración, operación y mantenimiento en coordinación con las entidades territoriales, proyectos,

Expediente No. 25000-23-27-000-2001-0479-01  
Acumulados Nos. 2000-0428, 2001-0122, 2001-0343  
Actor: GUSTAVO MOYA ÁNGEL Y OTROS  
Acción Popular

programas de desarrollo sostenible y obras de infraestructura cuya realización sea necesaria para la defensa y protección o para la descontaminación o recuperación del medio ambiente y los recursos naturales renovables - artículo 31, numeral 20 -

Dentro de los componentes del proyecto está el relacionado con la ampliación y optimización de la Ptar Salitre, que se encuentra, por demás, como una de las estrategias y hace parte del plan de acción del documento Conpes 3320.

En el marco de lo anterior, en el año de 2007, la CAR, el Distrito Capital a través de la Secretaría de Ambiente y la E.A.A.B., con el acompañamiento del Gobierno Nacional, suscribieron el Convenio 171, el cual le otorgó la responsabilidad de la inversión de la ampliación y optimización de la Ptar Salitre de 4m<sup>3</sup>/s, tratamiento primario, a 8m<sup>3</sup>/s, tratamiento secundario (documento allegado al proceso relacionado en el acápite de pruebas).

En cumplimiento de los compromisos y demás instrumentos, la CAR firmó el 20 de octubre de 2009, el contrato de consultoría No. 000680 con el Consorcio Hazen and Sawyer P.C. - Nippon Koei Co. Ltda., para realizar todos los estudios de alternativas para el tratamiento de la aguas residuales de las cuencas de los ríos Salitre, Torca y Jaboque, que permita ampliar el tratamiento actual de la Ptar Salitre.

Para el apalancamiento de las inversiones se buscó la consecución de los recursos en la Banca Multilateral, en ese sentido se logró el crédito por parte de la CAR con el Banco Mundial, por 250 millones de dólares.

Teniendo en cuenta lo anterior, se inició la segunda fase de ampliación y optimización de la Ptar Salitre, hoy día la misma cuenta con un diseño referencial y se abrió la licitación pública internacional 01/2013 que se encuentra en

Expediente No. 25000-23-27-000-2001-0479-01  
Acumulados Nos. 2000-0428, 2001-0122, 2001-0343  
Actor: GUSTAVO MOYA ÁNGEL Y OTROS  
Acción Popular

etapa de preclasificación de oferentes para el componente de diseño de detalle.

Se tiene previsto que una vez optimizada y ampliada la Ptar, se trate un caudal promedio de diseño de  $7,1 \text{ m}^3/\text{s}$  y un caudal pico horario con clima seco de  $14 \text{ m}^3/\text{s}$ , así como un caudal máximo en temporada de lluvias de  $26 \text{ m}^3/\text{s}$ .

Además del aumento de caudal, se vislumbra otras ventajas significativas, tales como la utilización del agua tratada para el bombeo y posterior manejo en el Distrito de riego y drenaje de la Ramada. La ampliación del distrito de riego no se ha podido realizar por la falta de agua y porque el recurso en términos de calidad no es adecuado.

Adicionalmente y como valor agregado encontramos la mayor producción de biogás, se trata de un gas combustible que se puede utilizar en la planta misma para i) el mantenimiento de la temperatura de los digestores anaerobios, entendiendo por ello el proceso de descomposición de la materia orgánica en ausencia de oxígeno, ii) el mantenimiento de la temperatura homogénea en todo el volumen del reactor, iii) la generación de electricidad, reduciendo los costos de operación de la planta.

## **SEGUNDA PTAR AGUAS ABAJO**

Con la construcción de una segunda planta de tratamiento aguas abajo del río Bogotá en la cuenca media, se garantizaría el tratamiento de las aguas residuales de los ríos, Fucha, Tintal, Tunjuelo y Soacha, el caudal medio sería de  $11.6 \text{ m}^3/\text{s}$ , que al incluir la infiltración el caudal medio en tiempo seco sería de  $17.1 \text{ m}^3/\text{s}$  y un caudal medio anual de  $19.0 \text{ m}^3/\text{s}$  con los aportes de las lluvias, con una población de 7.7 millones de habitantes.

Expediente No. 25000-23-27-000-2001-0479-01  
Acumulados Nos. 2000-0428, 2001-0122, 2001-0343  
Actor: GUSTAVO MOYA ÁNGEL Y OTROS  
Acción Popular

La solución requeriría además de la construcción del interceptor Fucha - Tunjuelo con pondaje en el sector de La Magdalena para amortiguar el caudal, interceptor Tunjuelo - Canoas paralelo al río Bogotá hasta la entrega de las aguas, obras de ingeniería ya construidas, acorde con lo previsto en el documento CONPES 3320.

Adicionalmente, se cumpliría con los objetivos de calidad establecidos en el Acuerdo CAR 043 de 2006 para la zona de su ubicación.

Según el documento de modelación dinámica presentado por la EAAB, en la cuenca media del río Bogotá con los tratamientos en Salitre y en una planta aguas abajo, se podría reducir sustancialmente la carga de materia orgánica y SST alcanzando para las condiciones favorables del escenario 13, un río de Clase 4 en Alicachín, incluso para valores máximos y medios.

Resulta evidente, acorde con los documentos que obran en el proceso, que la ciudad de Bogotá aporta los vertimientos con mayor carga contaminante en toda la cuenca hidrográfica, en este sentido las medidas y acciones que se emprendan para la reducción de dicha carga redundarán positivamente en el mejoramiento del río.

No se desconoce que a futuro se requiera de obras complementarias en el sistema de tratamiento de aguas residuales, lo anterior en razón a la necesidad de cumplir con los mencionados objetivos de calidad propuestos y el destino final del recurso hídrico. Sin perjuicio de lo anterior, el esquema seleccionado se convertirá en línea de base para las futuras decisiones teniendo en cuenta las nuevas tecnologías y/o avances en esa materia.

Desde el punto de vista financiero los beneficios no se hacen esperar, resulta más económico la construcción de dos plantas de tratamiento que de tres, la compra de predios, la remoción

Expediente No. 25000-23-27-000-2001-0479-01  
Acumulados Nos. 2000-0428, 2001-0122, 2001-0343  
Actor: GUSTAVO MOYA ÁNGEL Y OTROS  
Acción Popular

de tierras, entre otros se constituyen en parámetros importantes para ser tenidos en cuenta.

## 2. Definición de ubicación de la segunda planta de tratamiento - Cuenca media -

### 2.1. Consideraciones preliminares

Definido el esquema técnico y de saneamiento ambiental del río Bogotá de acuerdo con el estudio comparativo realizado en el numeral anterior (*dos plantas de tratamiento*), para la Sala resulta de suma importancia el análisis y definición de la alternativa de ubicación de la segunda planta de tratamiento en la cuenca media.

Ciertamente, teniendo en cuenta las diferencias institucionales y procesales de la Empresa de Acueducto y Alcantarillado de Bogotá - E.A.A.B., de Emgesa, de la E.E.B., de la Corporación Autónoma Regional de Cundinamarca - CAR, del Ministerio de Minas y Energía y de la Gobernación de Cundinamarca, la Sala se plantea la necesidad de estudiar las alternativas de ubicación de la Ptar en el marco de los siguientes escenarios A) **la conducción de las aguas residuales por gravedad sin necesidad de utilizar algún tipo de estación elevadora**, B) **la conducción de las aguas residuales a un sistema de distribución de caudales con estructura de elevación**, C) **el aprovechamiento hidroeléctrico de las alternativas de ubicación de la segunda planta**.

Sobre el particular y como documentos de referencia se encuentran dos (2) estudios contratados por la Empresa de Acueducto y Alcantarillado de Bogotá - E.A.A.B., a saber:

- **CONSORCIO HMV - IEHG (CONTRATO 1-02-26100-711-2006)**, *"Diseño de Ingeniería Básica del Interceptor Tunjuelo - Canoas"*. Estudio de viabilidad de localización de las

Expediente No. 25000-23-27-000-2001-0479-01  
Acumulados Nos. 2000-0428, 2001-0122, 2001-0343  
Actor: GUSTAVO MOYA ÁNGEL Y OTROS  
Acción Popular

obras para el tratamiento de las aguas residuales de las cuencas Fucha, Tintal, Tunjuelo y Soacha.

La finalidad del estudio no era otra, como se vislumbra en su objeto, que el diseño a nivel de ingeniería básica del ITC, no obstante en ejecución del contrato surgió como alternativa adicional que la entrega de las aguas que drenan el Interceptor Tunjuelo - Canoas aguas abajo de las compuertas de Alicachín, se realizaría **a una planta de tratamiento que se ubicaría en el sector conocido como "El Charquito" o un sector más bajo denominado "Carboneras", sobre la margen izquierda del río Bogotá, de manera que se eliminaría el bombeo hacia la planta de tratamiento que se había proyectado, evitando asimismo la construcción y operación de la estación elevadora de Canoas.**

En efecto, en ejecución del contrato y después de que se contemplara la construcción de la planta de tratamiento en el sector denominado Canoas (*Pot del 2000, Conpes 3320, Sentencia de primera instancia*), y para lo cual se contrató el diseño del sistema de conducción de las aguas residuales - interceptor Tunjuelo Canoas -, surgió la posibilidad de que las instalaciones de tratamiento no quedaran en el lugar en comento, sino que se ubicaran en Charquito o en Carboneras, lo anterior teniendo en cuenta la necesidad o no de la elevación de las aguas residuales del río. La revisión y el análisis de la solución planteada fue realizada por el Consorcio HMV - IEHG en el estudio citado.

Como justificación del examen de alternativa, el Consorcio precisó que la descarga de las aguas recolectadas por el interceptor río Bogotá y que deberán ser entregadas a la proyectada planta de tratamiento implicaría el análisis de las diferentes opciones que se podrían presentar en relación con los sistemas de

Expediente No. 25000-23-27-000-2001-0479-01  
 Acumulados Nos. 2000-0428, 2001-0122, 2001-0343  
 Actor: GUSTAVO MOYA ÁNGEL Y OTROS  
 Acción Popular

conducción mediante túnel, esto es, desde Tunjuelo a Charquito o Carboneras, por cuanto el interceptor era subterráneo, y era inevitable atravesar una montaña para llegar a los referidos sitios. Además de pensar en la generación eléctrica y las diferentes posibilidades de bombeo para disponer las aguas tratadas en la estación de bombeo denominada Alicachín.

Teniendo en cuenta lo anterior, el estudio redefinió su objeto en el sentido de comparar las **alternativas de tratamiento** que no requerían bombeo con una alternativa de ubicación que si lo requiere, esto es, Charquito y Carboneras frente a Canoas.

- **ESTUDIOS TÉCNICOS Y CONSTRUCCIONES LTDA - E.A.A.B. -** Consultoría para el estudio, verificación y recomendación sobre las especificaciones técnicas de los equipos electromecánicos, incluidos en la ingeniería básica realizada por la firma de consulta HMV Ingenieros Ltda e IEHG Grucon S.A. del interceptor Tunjuelo - Canoas - Alicachín incluyendo la estación elevadora Canoas EEC. Informe Final. Alternativa ubicación Ptar. Concepto sobre el aprovechamiento hidroeléctrico de las alternativas de ubicación de la segunda Ptar. Marzo 2009.

En este contexto, a partir del análisis separado de cada uno de los estudios existentes y dentro del marco del planteamiento del problema -¿cuál es la alternativa de ubicación de la segunda planta de tratamiento más beneficiosa para la solución integral de la contaminación del río Bogotá?-, se hará la exposición de las diversas opciones de localización, se revisarán tanto los costos asociados con la conducción de las aguas residuales, el movimiento de tierras, como de las obras adicionales para la disposición de las aguas a efectos del tratamiento - estación elevadora.

Expediente No. 25000-23-27-000-2001-0479-01  
Acumulados Nos. 2000-0428, 2001-0122, 2001-0343  
Actor: GUSTAVO MOYA ÁNGEL Y OTROS  
Acción Popular

Como consideración previa, la Sala estima importante hacer la siguiente precisión: los estudios contratados por la E.A.A.B. en cuanto comparan los costos de las diferentes alternativas presentadas, se circunscriben a la definición de la opción más favorable en términos económicos **para el tratamiento de las aguas residuales de la cuenca del río Bogotá** y no para la generación o aprovechamiento hidroeléctrico.

Ciertamente, la Empresa distrital contrató los estudios en comento para la comparación de la alternativa Canoas frente a las demás por cuanto la primera requiere de una infraestructura adicional - estación elevadora - para la disposición de las aguas residuales en la Ptar con el fin de que sean tratadas, independientemente si dicha estructura pueda ser utilizada luego como medio para que empresas como Emgesa puedan contar con el agua concesionada y suficiente para la generación de energía.

Sin perjuicio de lo anterior, la Sala estima necesario referirse al embalse del Muña y la generación eléctrica, al aprovechamiento hidroeléctrico del caudal del río Bogotá, a la comparación de los costos de la infraestructura de elevación de las aguas en Canoas que permite que la concesionaria Emgesa cuente con el caudal para la generación frente al costo de las obras adicionales que se requerirían si se escoge como ubicación para la segunda Ptar los sitios conocidos como Charquito y/o Carboneras, lo anterior dentro del marco de los proyectos multipropósito y el concepto de aprovechamiento general del recurso hídrico.

En este contexto, se hará una evaluación conjunta de los estudios contratados por la E.A.A.B. que fueron allegados al proceso, los cuales tienen por objeto la definición del esquema de tratamiento y de los argumentos expuestos sobre la necesidad de la generación eléctrica por parte de las empresas Emgesa y XM y del Ministerio de Minas y Energía en el embalse del Muña.

Expediente No. 25000-23-27-000-2001-0479-01  
 Acumulados Nos. 2000-0428, 2001-0122, 2001-0343  
 Actor: GUSTAVO MOYA ÁNGEL Y OTROS  
 Acción Popular

a. Estudios de viabilidad de localización de las obras para el tratamiento de las aguas residuales de las cuencas Fucha, Tintal, Tunjuelo y Soacha. Consorcio HMB - IEHG "Diseño de ingeniería básica del interceptor Tunjuelo - Canoas".

#### ii.2.1. Alternativas de localización de la segunda planta para el tratamiento de las aguas del río Bogotá

El primero de los estudios analiza las siguientes alternativas de localización de la segunda planta de tratamiento:

**ALTERNATIVA CANOAS:** Contempla la implementación de un sistema de tratamiento secundario el cual se localizaría en el predio Canoas - Soacha.

**ALTERNATIVA 1:** Contempla únicamente la implementación de un sistema de tratamiento primario el cual se localizaría en el sector del Charquito, donde se encuentra la antigua estación generadora térmica y los talleres de EMGESA. La localización propuesta sería:

Expediente No. 25000-23-27-000-2001-0479-01  
Acumulados Nos. 2000-0428, 2001-0122, 2001-0343

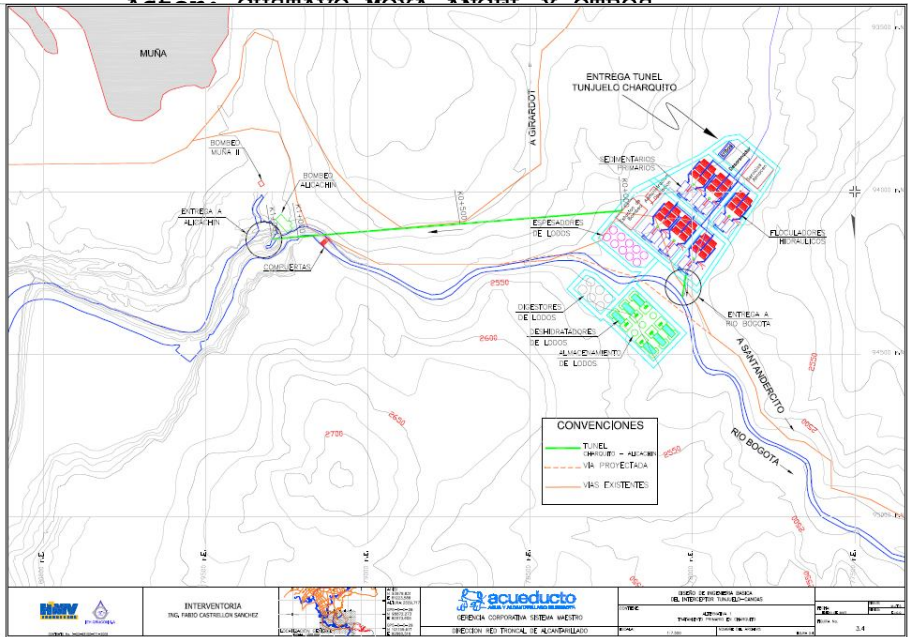

Fuente: E.A.A.B. – HMV

**ALTERNATIVA 2:** Contempla la implementación de un sistema de tratamiento secundario en el sector conocido como Carboneras - el primario quedaría en el Charquito alternativa 1, ubicado aproximadamente a un kilómetro y medio del sector del Charquito. Esta alternativa requiere un túnel adicional de flujo libre entre Charquito y Carboneras. La localización sería:

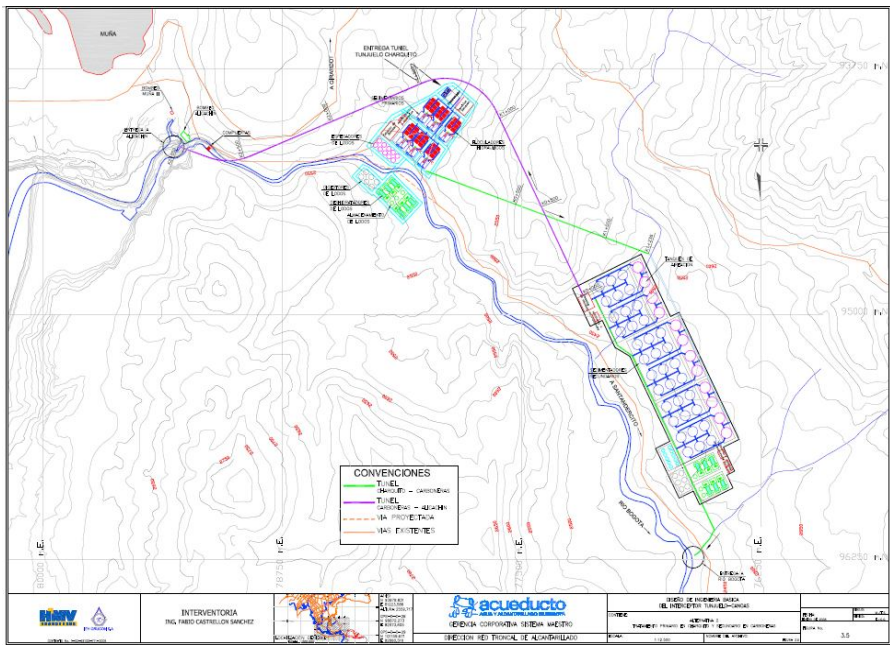

Fuente: E.A.A.B. – HMV

**ALTERNATIVA 3:** Contempla la ubicación de todas las estructuras de tratamiento en la margen izquierda del río Bogotá en el sitio conocido como "Carboneras". La

Expediente No. 25000-23-27-000-2001-0479-01  
Acumulados Nos. 2000-0428, 2001-0122, 2001-0343  
Actor: GUSTAVO MOYA ÁNGEL Y OTROS  
Acción Popular

distribución de los procesos de tratamiento se realiza en un solo nivel. La localización sería:

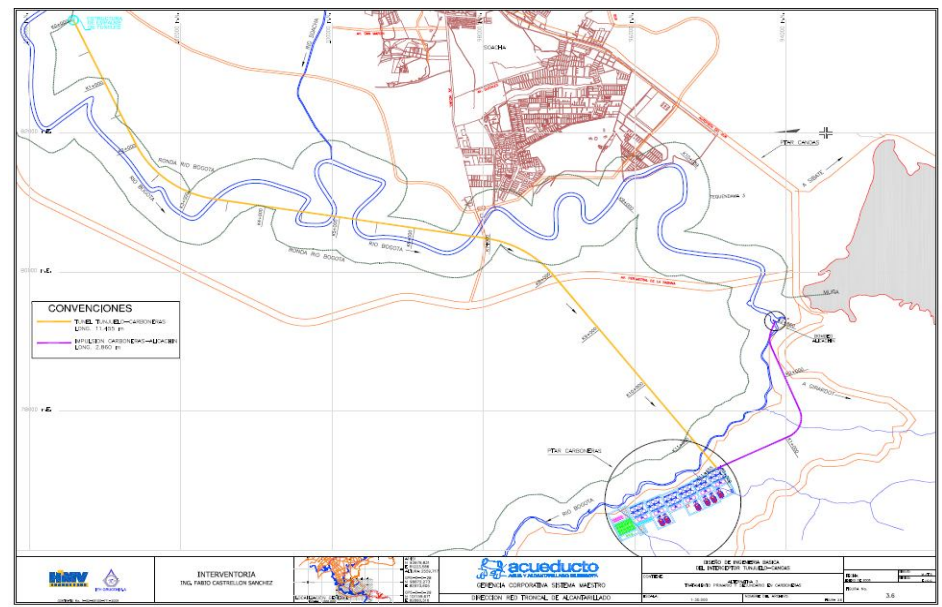

**ii.2.2. DISTRIBUCIÓN DE LOS PROCESOS DE TRATAMIENTO**

Para la distribución de la planta de tratamiento, el Consorcio utilizó el predimensionamiento de las estructuras presentado en el informe "*Prediseño Planta de Tratamiento de Aguas Residuales de Canoas*", por el consultor Carlos Alberto Giraldo López en junio de 2003.

**ii.2.2.1. ALTERNATIVA CANOAS**

En esta alternativa se realizó la distribución en el predio conocido como Canoas de los procesos que constituyen un tratamiento primario y secundario. Las estructuras que harían parte de dicha distribución serían: cribado, desarenadores, floculadores, sedimentadores, espesadores, digestores, deshidratadores, unidades de almacenamiento de lodos, tanques de aeración sedimentadores secundarios, unidades de deshidratación, digestores, espesadores y unidades de almacenamiento.

Expediente No. 25000-23-27-000-2001-0479-01  
Acumulados Nos. 2000-0428, 2001-0122, 2001-0343  
Actor: GUSTAVO MOYA ÁNGEL Y OTROS  
Acción Popular

La alternativa **requiere de la construcción de un túnel de emergencia o de desfogue - ya construido** - y de una estación elevadora. La primera obra resulta necesaria en aquellos eventos en los cuales la capacidad de la estación elevadora resulte insuficiente para elevar la totalidad del caudal, ya sea por problema en la estructura o por el alto contenido de aguas lluvias.

#### **ii.2.2.1.1. ESTACIÓN ELEVADORA DE CANOAS**

Para la alternativa 1 que contempla la construcción de la planta de tratamiento de aguas residuales sobre el margen izquierdo del río, se requiere la elevación de las aguas que drenan del interceptor Tunjuelo - Canoas para su posterior tratamiento en el sitio destinado para ese fin. Como se anotará, las alternativas 2, 3 y 4 no requieren de ningún tipo de estructura de elevación ya que las aguas transportadas por el mismo interceptor Tunjuelo - Canoas se entregarían por gravedad a la planta de tratamiento.

#### **ii.2.2.2. ALTERNATIVA 1 - CHARQUITO**

La distribución se realizó en el predio conocido como Charquito con un tratamiento primario, las estructuras que hacen parte serían: cribado, desarenadores, floculadores, sedimentadores, espesadores, digestores, deshidratadores, unidades de almacenamiento de lodos.

Adicionalmente, se requiere de espacios para los edificios de servicios, almacén, administración y operación, el área total sería de 19.2 ha.

La adaptación del predio Charquito para la ubicación del tratamiento comprende la reubicación de la vía que conduce al Municipio de Mesitas del Colegio y la canalización de la quebrada El Rodeo, las cuales pasan por el predio.

Expediente No. 25000-23-27-000-2001-0479-01  
Acumulados Nos. 2000-0428, 2001-0122, 2001-0343  
Actor: GUSTAVO MOYA ÁNGEL Y OTROS  
Acción Popular

Para el tratamiento de las aguas residuales no se necesita estructura de elevación.

#### **ii.2.2.3. ALTERNATIVA 2 - CHARQUITO CARBONERAS**

Se prevé que el tratamiento primario se realice en el predio Charquito y el tratamiento secundario en el sector conocido como Carboneras, tanto el primario como el secundario serían como se describió en la alternativa 1.

Se consideran espacios para los edificios de servicios, almacén y el de administración y operación, el área sería de 44.1 ha.

Para el tratamiento de las aguas residuales no se necesita estructura de elevación.

#### **ii.2.2.4. ALTERNATIVA 3 - CARBONERAS**

Contempla la ubicación de todas las estructuras de tratamiento en la margen izquierda en el sitio conocido como Carboneras. La distribución de los procesos de tratamiento se realizaría en un solo nivel.

Para el tratamiento de las aguas residuales no se necesita estructura de elevación.

#### **ii.2.3. ANÁLISIS DE COSTOS DE IMPLEMENTACIÓN DE LAS ALTERNATIVAS DE UBICACIÓN DE LA SEGUNDA PLANTA DE TRATAMIENTO SEGÚN HMV - IEHG**

Para la evaluación de las alternativas de ubicación de la Ptar, en síntesis, se tiene el siguiente cuadro:

Expediente No. 25000-23-27-000-2001-0479-01  
Acumulados Nos. 2000-0428, 2001-0122, 2001-0343  
Actor: GUSTAVO MOYA ÁNGEL Y OTROS  
Acción Popular

| ALTERNATIVA        | LUGAR                  | TRATAMIENTO           |
|--------------------|------------------------|-----------------------|
| Alternativa CANOAS | CANOAS                 | Primario y Secundario |
| Alternativa 1      | CHARQUITO              | Primario              |
| Alternativa 2      | CHARQUITO Y CARBONERAS | Primario y Secundario |
| Alternativa 3      | CARBONERAS             | Primario y Secundario |

Los costos de ubicación de las alternativas 1, 2 y 3 se comparan con los valores de implementar la alternativa Ptar Canoas en cuanto ésta requiere de una estación elevadora para la disposición de las aguas.

ii.2.3.1. COSTOS DE MOVIMIENTO DE TIERRAS

Siguiendo el estudio de HMV - IEHG, el movimiento de tierras derivado de la construcción de las plantas de tratamiento es un movimiento a gran escala, el terreno esperado es en su mayoría suelos rocosos, en ese sentido se estimó que el costo por m³ era de US\$ 3 para el 2007, año del estudio.

Para calcular los costos asociados a los rellenos el Consorcio HMV - IEHG utilizó un valor de \$ 39,648/m³, que correspondía al precio unitario de relleno seleccionado en el informe *"Planteamiento y Prediseño de Alternativas y Selección de alternativas básica Interceptor Tunjuelo - Canoas"*, elaborado por el mismo Consorcio en el mes de julio de 2007.

Observando lo anterior, en el estudio se describieron los costos asociados al movimiento de tierras para cada alternativa de la siguiente forma:

| Alternativa No. | Excavación<br>(Valor Unitario = \$ 6,000 / m³) |                      | Relleno<br>(Valor Unitario = \$ 39,648 / m³) |                      | Vr. Total<br>(millones de \$) |
|-----------------|------------------------------------------------|----------------------|----------------------------------------------|----------------------|-------------------------------|
|                 | Cantidad (m³)                                  | Vr. Total (millones) | Cantidad (m³)                                | Vr. Total (millones) |                               |

Expediente No. 25000-23-27-000-2001-0479-01  
Acumulados Nos. 2000-0428, 2001-0122, 2001-0343  
Actor: GUSTAVO MOYA ÁNGEL Y OTROS  
Acción Popular

|        |            |          |           |          |         |
|--------|------------|----------|-----------|----------|---------|
|        |            | s de \$) |           | s de \$) |         |
| 1      | 2,653,327  | 15.920   | 237,986   | 9.436    | 25.356  |
| 2      | 15,473,028 | 92.838   | 610,064   | 24.188   | 117.026 |
| 3      | 17,689,132 | 106.135  | 1,815,324 | 71.974   | 178.109 |
| Canoas | 3,088,189  | 18.529   | 654,653   | 25.956   | 44.485  |

Fuente: Estudio HMV - IEHG 2007

ii.2.3.2. COSTOS DE LA ESTACIÓN ELEVADORA

El estudio del Consorcio HMV - IEHG en relación con los costos de la estación elevadora, precisó lo siguiente:

"Para determinar el costo de las bombas se toma una cotización hecha por Ferrostal de Colombia Ltda. para la Planta de Tratamiento de Aguas Residuales Bello a nombre de las Empresas Públicas de Medellín, de fecha 10 de mayo de 2007. Basados en experiencias previas se establece que el costo del motor es aproximadamente el 55% del costo del conjunto motobomba.

"A partir de la variación del peso de la bomba en función del diámetro del impulsor, es posible encontrar variación del costo de la bomba para diferentes diámetros del impulsor, empleando un factor que relacione el costo y el peso de la bomba. Con base en la información disponible, se puede establecer que este factor es del orden de US \$ 29/kg, es decir, \$5,980/kg (asumiendo una tasa de cambio de \$2000/usd).

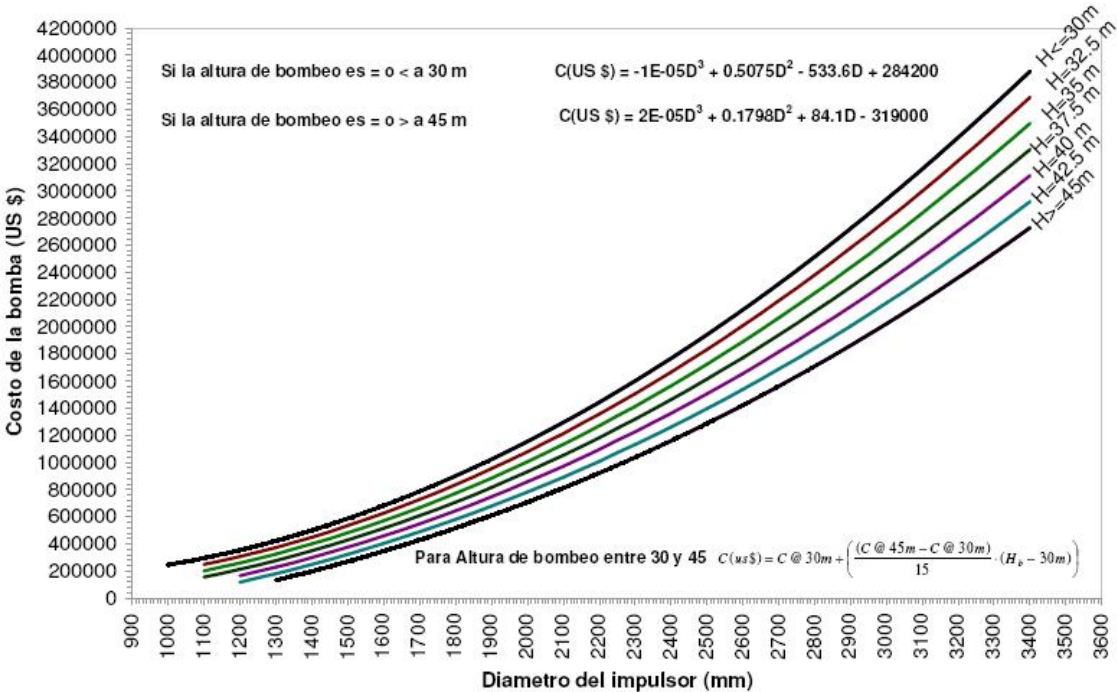

Expediente No. 25000-23-27-000-2001-0479-01  
Acumulados Nos. 2000-0428, 2001-0122, 2001-0343  
Actor: GUSTAVO MOYA ÁNGEL Y OTROS  
Acción Popular

"Para determinar el costo de la estación elevadora requerida para el aprovechamiento hidroeléctrico se tomó como base el presupuesto establecido en el estudio de alternativas para la Estación Elevadora de Tunjuelo elaborado por HMV - IEHG en el año de 2003 dentro del Estudio de Actualización del Plan Maestro de la cuenca del Fucha. En el cuadro 6.13 en el cual se muestran los porcentajes de costo de la estación elevadora con bombas centrífugas, se puede apreciar que los costos de la estación elevadora están determinados por el costo de los equipos mecánicos, para los cuales se estimaron los porcentajes de cada ítem de acuerdo al costo del conjunto bomba motor, tal como se muestra en el cuadro 6.14.

"Cuadro 6.13 Porcentaje de costos para estación elevadora con bombas centrífugas

| ÍTEM                                    | Porcentaje de costos (%) |
|-----------------------------------------|--------------------------|
| Equipos mecánicos                       | 47%                      |
| Obra civil y elementos arquitectónicos  | 36%                      |
| Equipo eléctrico (incluida Subestación) | 11%                      |
| Obras complementarias                   | 5%                       |
| Manejo ambiental e impacto urbano       | 1%                       |

"Cuadro 6.14 Porcentaje de costos para equipos mecánicos en la estación elevadora con bombas centrífugas

| ÍTEM                                    | Porcentaje de costos (%) |
|-----------------------------------------|--------------------------|
| Bombas y motores                        | 90%                      |
| Puente grúa con accionamiento eléctrico | 1.5%                     |
| Rejas y maquinas limpiarrejas           | 3%                       |
| Compuertas                              | 3%                       |
| Auxiliares mecánicos                    | 0.5%                     |
| Repuestos                               | 2%                       |

"Tomando como base el factor obtenido y los pesos estimados de las bombas para diferentes alturas de bombeo, se determina la variación del costo de la bomba en función de la altura de bombeo. De acuerdo a los análisis realizados por el Consorcio HMV - IEHG en el 2007, para el Planteamiento y prediseño de alternativas y selección de alternativas de conducción Tunjuelo Canoas", estudio realizado dentro del desarrollo del proyecto "Diseño de ingeniería

Expediente No. 25000-23-27-000-2001-0479-01  
Acumulados Nos. 2000-0428, 2001-0122, 2001-0343  
Actor: GUSTAVO MOYA ÁNGEL Y OTROS  
Acción Popular

básica del Interceptor Tunjuelo Canoas”, si se mantiene constante la capacidad de la bomba, se puede asumir que el costo de la estación elevadora varía linealmente en función de la altura de bombeo requerida para el rango entre 15 y 30 metros de altura y para alturas iguales o mayores a 45 metros. Para estimar los costos para bombas con alturas de bombeo entre 30 y 45 metros se interpolan los valores obtenidos para 30 y 45 metros. En particular los costos del conjunto bomba - motor con capacidad constante de 6 m³/s y velocidad de giro N = 300 r.p.m. para alturas de bombeo iguales a menores a 30 metros se estiman con la siguiente regresión:

$$C = 88.394H_B + 1432.2$$

"Para alturas de bombeo mayores o iguales a 45 metros, capacidad constante de 6m³/s y velocidad de giro N = 300 r.p.m., los costos de los equipos bomba - motor se estiman con la siguiente regresión:

$$C = 67.923H_B + 321.36$$

"Donde:

"C es el costo del conjunto bomba - motor en millones de pesos

"H<sub>B</sub> es la altura total de bombeo en metros

"Gráfica 5.2. Variación del costo de la motobomba con capacidad igual, a diferentes alturas

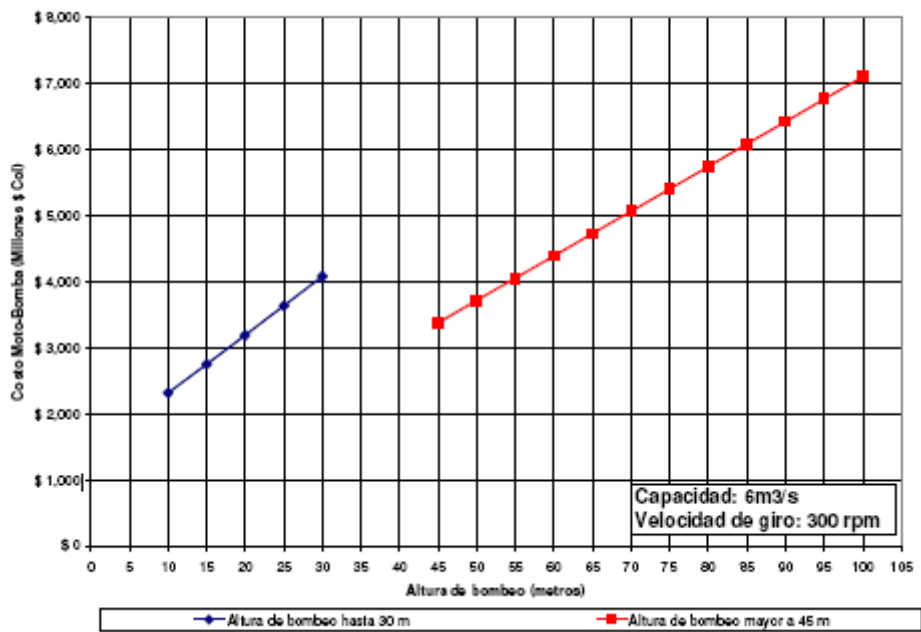

Expediente No. 25000-23-27-000-2001-0479-01  
Acumulados Nos. 2000-0428, 2001-0122, 2001-0343  
Actor: GUSTAVO MOYA ÁNGEL Y OTROS  
Acción Popular

"A partir del costo conjunto bomba - motor, el número de unidades y los porcentajes definidos en los cuadros 6.13 y 6.14, es posible estimar el costo total de la Estación Elevadora Canoas con bombas centrífugas para la altura requerida. Los costos estimados se presentan en el cuadro 5.8.

"Costo bomba - motor (1 unidad):  
 $C = 67.923 \times 55.11 + 321.36 = 4,065$  millones de pesos

"Costo bomba - motor (5 unidades):  
 $4,065 \times 5 = 20,323$  millones de pesos

"Cuadro 5.8 Costos estimados de los equipos mecánicos

| ÍTEM                                    | Costos (Millones \$ Col) |
|-----------------------------------------|--------------------------|
| Bombas y motores                        | 20,323                   |
| Puente grúa con accionamiento eléctrico | 339                      |
| Auxiliares mecánicos                    | 677                      |
| Rejas y máquinas limpia rejas           | 677                      |
| Compuertas                              | 113                      |
| Repuestos                               | 452                      |
| TOTAL EQUIPOS MECÁNICOS                 | 22,581                   |

"Tomando como base el costo de los equipos mecánicos, se estiman los costos de cada uno de los ítems evaluados para la estación elevadora y el costo total de la estación elevadora

"Cuadro 5.9. Costos estimados de la Estación Elevadora Canoas

| ÍTEM                                    | Costos (Millones \$ Col) |
|-----------------------------------------|--------------------------|
| Equipos mecánicos                       | 22.581                   |
| Obra civil y elementos arquitectónicos  | 17.296                   |
| Equipo eléctrico (incluida subestación) | 5.285                    |
| Obras Complementarias                   | 2.402                    |
| Manejo ambiental e impacto urbano       | 480                      |
| <b>Total Costos Directos</b>            | <b>48.045</b>            |
| Imprevistos (35%)                       | 16.816                   |
| AIU (30%)                               | 19.458                   |
| <b>TOTAL ESTACIÓN ELEVADORA</b>         | <b>84.319</b>            |

"Los costos de mantenimiento se determinan como un porcentaje del costo de los equipos mecánicos. Se estima que este porcentaje puede estar alrededor del

Expediente No. 25000-23-27-000-2001-0479-01  
Acumulados Nos. 2000-0428, 2001-0122, 2001-0343  
Actor: GUSTAVO MOYA ÁNGEL Y OTROS  
Acción Popular

15% de los costos de los equipos mecánicos, es decir, 3,387 millones de pesos anuales.

"Los costos de mantenimiento se estiman durante una vida útil del proyecto de 20 años (período entre el año 2010 y 2030) a una tasa interna de retorno de 12 %.

"Para evaluar el costo de operación se calcula la potencia requerida para bombear el caudal medio estimado que llegará a la estación, año por año, durante 20 años del período de análisis, asumiendo que la operación de la Estación Elevadora iniciará en el año 2010 y tomando un costo de energía de \$180/KW-h.

"Cuadro 5.10 Costos de operación Estación Elevadora Canoas  
(Millones de pesos)

| Año   | Caudal<br>(l/s) | Potencia<br>requerida<br>(MWh/año) | Costo<br>anual<br>(Millones<br>de pesos \$<br>Col) | VPN<br>(Millones<br>de pesos<br>\$ Col) |
|-------|-----------------|------------------------------------|----------------------------------------------------|-----------------------------------------|
| 2010  | 10,129          | 56,105                             | 10.099                                             | 7.188                                   |
| 2011  | 10,222          | 56,620                             | 10.192                                             | 6.477                                   |
| 2012  | 10,316          | 57,141                             | 10.285                                             | 5.836                                   |
| 2013  | 10,403          | 57,623                             | 10.372                                             | 5.255                                   |
| 2014  | 10,488          | 58,094                             | 10.457                                             | 4.730                                   |
| 2015  | 10,511          | 58,221                             | 10.480                                             | 4.233                                   |
| 2016  | 10,591          | 58,664                             | 10.560                                             | 3.808                                   |
| 2017  | 10,660          | 59,047                             | 10.628                                             | 3.422                                   |
| 2018  | 10,731          | 59,440                             | 10.699                                             | 3.076                                   |
| 2019  | 10,807          | 59,861                             | 10.775                                             | 2.766                                   |
| 2020  | 10,895          | 60,348                             | 10.863                                             | 2.489                                   |
| 2021  | 11,003          | 60,946                             | 10.970                                             | 2.245                                   |
| 2022  | 11,087          | 61,412                             | 11.054                                             | 2.020                                   |
| 2023  | 11,173          | 61,888                             | 11.140                                             | 1.817                                   |
| 2024  | 11,260          | 62,370                             | 11.227                                             | 1.635                                   |
| 2025  | 11,329          | 62,752                             | 11.295                                             | 1.469                                   |
| 2026  | 11,399          | 63,140                             | 11.365                                             | 1.320                                   |
| 2027  | 11,470          | 64,533                             | 11.436                                             | 1,186                                   |
| 2028  | 11,505          | 63,727                             | 11.471                                             | 1,062                                   |
| 2029  | 11,530          | 63,866                             | 11.496                                             | 950                                     |
| 2030  | 11,554          | 63,998                             | 11.520                                             | 850                                     |
| TOTAL |                 |                                    |                                                    | 63,832                                  |

ii.2.4. COMPARACIÓN DE COSTOS DE LAS ALTERNATIVAS PARA LA UBICACIÓN DE LA SEGUNDA PLANTA DE TRATAMIENTO HMV - IEHG

La siguiente tabla muestra la comparación de costos de las alternativas 1, 2 y 3 analizadas para la ubicación de la

Expediente No. 25000-23-27-000-2001-0479-01  
Acumulados Nos. 2000-0428, 2001-0122, 2001-0343  
Actor: GUSTAVO MOYA ÁNGEL Y OTROS  
Acción Popular

segunda planta de tratamiento, con los costos asociados a la construcción de la Ptar en Canoas, valores estos últimos que fueron tomados por el Consorcio HMV - IEHG del informe "Planteamiento y prediseño de alternativas y selección de alternativa básica Interceptor Tunjuelo - Canoas, elaborado por ellos en el mes de julio de 2007.

| DESCRIPCIÓN                          | PTAR<br>Canoas | Alternati<br>va 1      | Alternativa<br>2 | Alternativ<br>a<br>3 |
|--------------------------------------|----------------|------------------------|------------------|----------------------|
| Ubicación Tratamiento Primario       | Canoas         | Charquito              | Charquito        | Carboneras           |
| Ubicación Tratamiento Secundario     |                | Sin<br>Tratamien<br>to | Carboneras       |                      |
| CONDUCCIONES                         |                |                        |                  |                      |
| Túnel Tunjuelo - Canoas              | 173,720        |                        |                  |                      |
| Túnel de desfogue                    | 31,870         |                        |                  |                      |
| Interceptor Soacha                   |                | 15,886                 | 15,886           | 15,886               |
| Túnel Tunjuelo - Charquito           |                | 121,347                | 121,347          |                      |
| Túnel Charquito - Carboneras         |                |                        | 10,920           |                      |
| Túnel Tunjuelo - Carboneras          |                |                        |                  | 107,886              |
| SUBTOTAL CONDUCCIONES                | 205,589        | 137,233                | 148,153          | 123,772              |
| MOVIMIENTO DE TIERRAS                |                |                        |                  |                      |
| Asociados a las excavaciones         | 18,529         | 15,920                 | 92,838           | 106,135              |
| Asociados a los rellenos             | 25,956         | 9,436                  | 24,188           | 71,974               |
| SUBTOTAL MOVIMIENTO DE TIERRAS       | 44,485         | 25,356                 | 117,026          | 178,109              |
| CONDUCCIONES Y MOVIMIENTO DE TIERRAS |                |                        |                  |                      |
| SUBTOTAL CONDUCCIONES                | 205,589        | 137,233                | 148,153          | 123,772              |
| IMPREVISTOS (35%)                    | 71,956         | 48,032                 | 51,854           | 43,320               |
| SUBTOTAL MOVIMIENTO DE TIERRAS       | 44,485         | 25,356                 | 117,026          | 178,109              |
| TOTAL INVERSIÓN INICIAL              | 322,030        | 210,620                | 317,033          | 345,201              |
| AIU (30%)                            | 96,609         | 63,186                 | 95,110           | 103,560              |
| TOTAL INVERSIÓN INICIAL + AIU        | 418,640        | 273,806                | 412,143          | 448,761              |
| ESTACIÓN ELEVADORA                   |                |                        |                  |                      |
| Inversión Inicial                    | 48,045         | No requiere            |                  |                      |
| Imprevistos (35%)                    | 16,816         |                        |                  |                      |
| AIU (30%)                            | 19,458         |                        |                  |                      |
| TOTAL ESTACIÓN ELEVADORA             | 84,319         |                        |                  |                      |
| Costos de energía 25 años            | 82,797         | No requiere            |                  |                      |
| Mantenimiento 25 años                | 39,987         |                        |                  |                      |
| TOTAL OPERACIÓN Y MANTENIMIENTO      | 122,785        |                        |                  |                      |
| RESUMEN FINAL                        |                |                        |                  |                      |
| TOTAL INVERSIÓN INICIAL + AIU        | 393,464        | 273,806                | 412,143          | 448,761              |
| TOTAL ESTACIÓN ELEVADORA             | 126,918        | No requiere            |                  |                      |
| TOTAL OPERACIÓN Y MANTENIMIENTO      | 122,785        |                        |                  |                      |
| TOTAL ALTERNATIVA                    | 643,166        | 273,806                | 412,143          | 448,761              |
| DIFERENCIA PORCENTUAL (%)            | 0%             | 57.4%                  | 35.9%            | 30.2%                |

Fuente: Estudio HMV - IEHG valores en millones de pesos - 2007

Expediente No. 25000-23-27-000-2001-0479-01  
Acumulados Nos. 2000-0428, 2001-0122, 2001-0343  
Actor: GUSTAVO MOYA ÁNGEL Y OTROS  
Acción Popular

#### **ii.2.5. ANÁLISIS Y CONCLUSIONES DE LA COMPARACIÓN DE COSTOS DE LAS ALTERNATIVAS PARA LA UBICACIÓN DE LA SEGUNDA PLANTA DE TRATAMIENTO**

Como presupuesto metodológico para la presente decisión y en aras de evitar confusiones, la Sala recalca que en los numerales posteriores se analizará como supuesto de hecho conexo a la definición de la alternativa más beneficiosa de ubicación de la segunda planta de tratamiento el aprovechamiento del caudal para la generación eléctrica, por lo anterior la comparación que se realiza **SE CIRCUNSCRIBE EN ESTE MOMENTO A LOS COSTOS DE LAS PTAR EN CUANTO AL TRATAMIENTO DE AGUAS RESIDUALES, ESTO ES, EL VALOR DE LA INFRAESTRUCTURA QUE SE REQUIERE CON ESE FIN.**

Partiendo del anterior supuesto, la comparación de costos toma como eje de definición tres (3) elementos preponderantes en la solución técnica a saber: i) la conducción de las aguas residuales, ii) el movimiento de tierra y iii) la estación elevadora junto con los costos de operación y mantenimiento.

En lo atinente al primero de ellos - *sistema de conducción* -, la Sala precisa que si bien es cierto que a la fecha ya se construyeron por parte de la E.A.A.B. los interceptores Tunjuelo - Canoas, Túnel de emergencia (*túnel de desfogue*) desembocando el río Bogotá aguas abajo de las puertas de Alicachín, **también lo es que se harán breves comentarios sobre las cifras plasmadas como ejercicio de comparación de alternativas.**

No se pretende hacer un análisis a las recomendaciones y/o conclusiones del estudio en lo atiente a la definición del sistema de conducción - construcción del túnel de Tunjuelo a los sitios denominados "El Charquito" o "Carboneras", lo anterior no sólo porque ya se adoptó materialmente la

Expediente No. 25000-23-27-000-2001-0479-01  
Acumulados Nos. 2000-0428, 2001-0122, 2001-0343  
Actor: GUSTAVO MOYA ÁNGEL Y OTROS  
Acción Popular

decisión sino porque cambiar la misma implicaría el desconocimiento de los estudios especializados y/o técnicos contratados por la propia Empresa de Acueducto y Alcantarillado de Bogotá - E.A.A.B. y de los principios de planeación, economía y responsabilidad, adicionalmente con dicha decisión se produciría un detrimento patrimonial por el costo de los mismos y por la inutilización de las obras ya construidas, el cual ascendería a 404 mil millones de pesos.

Vale la pena aclarar que la infraestructura construida el día de hoy servirá en todos los escenarios en la definición de la alternativa de ubicación de la segunda planta de tratamiento en el sector aguas abajo de la cuenca media, no obstante dependiendo de la localización escogida se podrán presentar obras adicionales pero a nivel de conexión - es el caso de la alternativa de Charquito tratamiento primario y Carboneras tratamiento secundario que requiere de un túnel adicional de flujo libre entre ellos -.

En este contexto, revisada la tabla en detalle se encuentra que la conducción de las aguas desde Tunjuelo a Canoas sería más costosa - \$ 205.589 millones de pesos, frente a las alternativas 1, 2 y 3, siendo carboneras la más económica - 123,772 millones de pesos. Asociado a todas las conducciones se establece un porcentaje del 35% de imprevistos.

En lo que tiene que ver con el movimiento de tierras, la Sala observa, que teniendo en cuenta que la clase de relleno seleccionado por el Consorcio es el mismo para todas las alternativas, la alternativa 1 del estudio, esto es, Charquito con tratamiento primario, es la más económica (\$25.356), continuando por la alternativa Canoas (\$44.485), luego Charquito - Carboneras (\$117.036) y finalmente la opción Carboneras (\$178.109).

Como bien lo señala la propia empresa de Acueducto (fl. 20 del memorial presentado al Consejo de Estado) el sitio

Expediente No. 25000-23-27-000-2001-0479-01  
Acumulados Nos. 2000-0428, 2001-0122, 2001-0343  
Actor: GUSTAVO MOYA ÁNGEL Y OTROS  
Acción Popular

Carboneras se encuentra en terreno inclinado, por lo que el costo del movimiento de tierras para la construcción de la Ptar es significativamente mayor que en el caso de Canoas.

Finalmente, en las alternativas planteadas solo se requiere de estructura de elevación en Canoas, no se necesita en ninguna de las 3 opciones, lo cual implicaría un costo adicional para ella de \$ 122.785 millones de pesos incluyendo operación y mantenimiento.

En suma, de acuerdo con las estimaciones del Consorcio HMV - IEHG (2007) a pesar del costo mayor del movimiento de tierras en Carboneras - alternativa 3 -, el costo total de conducción, movimiento de tierras asociado a la Ptar y construcción, operación y mantenimiento de la estación elevadora es un 30.2% menor en dicho lugar respecto de la alternativa Canoas. Con relación a las alternativas 1 y 2 es 57.4% y 35.9% respectivamente menor en estas.

|                        | CANOAS                          | ALTERNATIVA<br>1                | ALTERNATIVA<br>2                | ALTERNATIVA<br>3                |
|------------------------|---------------------------------|---------------------------------|---------------------------------|---------------------------------|
| <b>COSTO<br/>TOTAL</b> | 643,166<br>millones<br>de pesos | 273,806<br>millones de<br>pesos | 412,143<br>millones de<br>pesos | 448,761<br>millones de<br>pesos |
| <b>PORCENTAJE</b>      | 0%                              | 57.4%                           | 35.9%                           | 30.2%                           |

Se resalta que no se incluyó en la tabla de comparación los costos asociados con los elementos que hacen parte de la Ptar, lo anterior en razón a que estos son similares independientemente de la ubicación de la misma.

b. Consultoría para el estudio, verificación y recomendación sobre las especificaciones técnicas de los equipos electromecánicos, incluidos en la ingeniería básica realizada por la firma de consulta HMV - IEHG elaborado por estudios técnicos y construcciones Ltda. - E.A.A.B. - marzo 2009

Expediente No. 25000-23-27-000-2001-0479-01  
Acumulados Nos. 2000-0428, 2001-0122, 2001-0343  
Actor: GUSTAVO MOYA ÁNGEL Y OTROS  
Acción Popular

En cumplimiento del contrato de consultoría la empresa Estudios Técnicos y Construcciones Ltda. estudió y verificó las especificaciones técnicas de los equipos electromecánicos incluidos en la ingeniería básica realizada por el Consorcio HMV - IEHG en 2007 incluyendo la estación elevadora - la alternativa de la ubicación de la segunda Ptar.

**II.3.1. ACTUALIZACIÓN Y CORRECCIÓN DE LA COMPARACIÓN DE COSTOS DE LAS ALTERNATIVAS PARA LA UBICACIÓN DE LA SEGUNDA PLANTA DE TRATAMIENTO REALIZADO POR EL CONSORCIO HMV - IEHG**

Como bien lo manifestó la E.A.A.B. en la consultoría se actualizaron los costos (de 2007 a 2009) y se corrigieron algunos ítems del informe de HMV - IEHG, tales como el valor del movimiento de tierras y la estación elevadora (fl. 22 memorial presentado al Consejo de Estado).

En este sentido, la Sala observa que en el documento técnico producto del contrato se analizaron dos (2) de las alternativas de localización del tratamiento de aguas residuales que fueron estudiadas por HMV - IEHG: i) Canoas - tratamiento primario y secundario ii) Alternativa 3: Carboneras - tratamiento primario y secundario. Los costos son comparados en la siguiente tabla:

**Comparación de costos**  
**Alternativa Canoas vs alternativa 3 - Carboneras**  
**Valores en millones de pesos - 2009**

| DESCRIPCION                                           | PTAR Canoas | PTAR Carboneras |
|-------------------------------------------------------|-------------|-----------------|
| <b>CONDUCCIONES</b>                                   |             |                 |
| Túnel Tunjuelo - Canoas-, Incluye túnel de Fuga       | 172.772     |                 |
| Interceptor Soacha                                    | 6.501       | 6.501           |
| Túnel Tunjuelo - Carboneras                           |             | 58.950          |
| <b>SUBTOTAL CONDUCCIONES</b>                          | 179.273     | 65.451          |
| <b>MOVIMIENTO DE TIERRAS PTAR</b>                     |             |                 |
| Asociados a las excavaciones                          | 21.308      | 122.055         |
| Asociados a los rellenos                              | 29.849      | 82.770          |
| <b>SUBTOTAL MOVIMIENTOS DE TIERRAS</b>                | 51.158      | 204.825         |
| <b>SUBTOTAL CONDUCCIONES Y MOVIMIENTOS DE TIERRAS</b> |             | 370.277         |

Expediente No. 25000-23-27-000-2001-0479-01  
Acumulados Nos. 2000-0428, 2001-0122, 2001-0343  
Actor: GUSTAVO MOYA ÁNGEL Y OTROS  
Acción Popular

|                                           |         |         |
|-------------------------------------------|---------|---------|
|                                           | 230.431 |         |
| AIU (30%)                                 | 69.129  | 111.083 |
| TOTAL INVERSIÓN INICIAL + AIU             | 299.560 | 481.360 |
| ESTACIÓN ELEVADORA                        |         |         |
| Inversión inicial + AIU                   | 305.875 |         |
| TOTAL ESTACIÓN ELEVADORA                  | 305.875 |         |
| OPERACIÓN Y MANTENIMIENTO                 |         |         |
| Costos de energía y mantenimiento 20 años | 199.392 |         |
| TOTAL OPERACIÓN Y MANTENIMIENTO           | 199.392 |         |
| RESUMEN FINAL                             |         |         |
| TOTAL INVERSIÓN INICIAL + AIU             | 299.560 | 481.360 |
| TOTAL ESTACIÓN ELEVADORA                  | 305.875 |         |
| TOTAL OPERACIÓN Y MANTENIMIENTO EE        | 199.392 |         |
| TOTAL ALTERNATIVA                         | 804.827 | 481.360 |
| DIFERENCIAL PORCENTUAL (%)                | 0%      | 40%     |

Fuente: Estudios Técnicos y Construcciones 2009

Del análisis de los valores presentados por la empresa Estudios Técnicos y Construcciones Ltda., la Sala encuentra la variación en los costos de algunos ítems respecto de los presentados por HMV - IEHG, a saber:

ii.3.1.1. EN CUANTO A LA CONDUCCIÓN

En el estudio de HMV - IEHG para Canoas el interceptor Tunjuelo - Canoas y el Túnel de desfogue costaba \$ 205.589 millones sin incluir el valor del interceptor Soacha, con el informe de 2009 el costo del interceptor Tunjuelo - Canoas incluyendo el túnel de fuga es de 172.772, variación de menor costo de \$ 32.817 millones. Se adicionó el valor del interceptor Soacha \$ 6.501 millones.

En el estudio HMV - IEHG para Carboneras el interceptor Tunjuelo - Carboneras costaba \$ 107.886 millones, con el informe de 2009 el costo subió a \$ 158.950 millones, variación de \$ 51.064 millones.

LA ALTERNATIVA CANOAS EN CONDUCCIÓN DE AGUAS RESIDUALES RESULTA MÁS COSTOSA QUE RESPECTO DE LA ALTERNATIVA 3 - CARBONERAS.

ii.3.1.2. EN CUANTO AL MOVIMIENTO DE TIERRAS

Expediente No. 25000-23-27-000-2001-0479-01  
Acumulados Nos. 2000-0428, 2001-0122, 2001-0343  
Actor: GUSTAVO MOYA ÁNGEL Y OTROS  
Acción Popular

En el estudio de HMV - IEHG para Canoas el movimiento de tierras era: excavaciones \$ 18.529 millones y rellenos \$25.956 millones, para un total de \$ 44.485 millones, en el informe de 2009: excavaciones \$ 21.308 millones y rellenos \$29.849 millones, para un total de \$ 51.158 millones, variación de mayor costo de \$ 6.673 millones.

En el estudio HMV - IEHG para Carboneras el movimiento de tierras era: excavaciones \$ 106.135 millones y rellenos \$71.974 millones, para un total de \$178.109 millones, en el informe de 2009: excavaciones \$ 122.055 millones y rellenos \$82,770 millones, para un total de \$ 204.825 millones, variación de mayor costo de \$ 26.716 millones.

**LA ALTERNATIVA CANOAS EN MOVIMIENTO DE TIERRAS RESULTA MÁS ECONÓMICA RESPECTO DE LA ALTERNATIVA 3 - CARBONERAS.**

#### **ii.3.1.3. EN CUANTO A LA ESTACIÓN ELEVADORA**

En el estudio de HMV - IEHG para Canoas el costo de la estación elevadora era de \$ 84.319 millones en el informe de 2009 es de \$ 305.875 millones incluyendo en ambos AIU, variación de mayor costo de \$ 221.556 millones.

En el estudio de HMV - IEHG para Canoas el costo operación y mantenimiento de la estación elevadora era de \$ 122.784 millones, en el informe de 2009 es de \$ 199.392 millones, variación de mayor costo de \$ 76.608 millones. Se resalta que en el primero de ellos se calculó el ítem **sobre 25 años y en éste último sobre 20 años.**

Tanto en el estudio de HMV - IEGH como en el informe de 2009 de Estudios Técnicos y Construcciones para Carboneras no se requiere estación elevadora.

Expediente No. 25000-23-27-000-2001-0479-01  
Acumulados Nos. 2000-0428, 2001-0122, 2001-0343  
Actor: GUSTAVO MOYA ÁNGEL Y OTROS  
Acción Popular

La alternativa Canoas en el ítem de estación elevadora, operación y mantenimiento de la misma resulta más costosa que respecto de la alternativa 3 - Carboneras, lo anterior por cuanto en ésta última no se requiere tal estructura para el tratamiento de aguas residuales.

#### **ii.3.2. ANÁLISIS Y CONCLUSIONES DE LA COMPARACIÓN DE COSTOS DE LAS ALTERNATIVAS PARA LA UBICACIÓN DE LA SEGUNDA PLANTA DE TRATAMIENTO - INFORME ESTUDIOS TÉCNICOS Y CONSTRUCCIONES LTDA**

La Sala observa que la alternativa de localizar la planta de tratamiento en un sector donde no se requiere bombeo es la alternativa más económica para la Empresa de Acueducto y Alcantarillado de Bogotá E.A.A.B., por cuanto en los datos del informe de 2009 de la empresa Estudios Técnicos y Construcciones Ltda. la variación porcentual de costo sería del 40%, el mayor valor, en esencia, se circunscribe al costo de las obras - estación elevadora - y de la operación y mantenimiento de la misma.

En otras palabras, a pesar de la variación del valor de algunos ítems, la conclusión es similar a la que se llegó con las cifras presentadas por el Consorcio HVM - IEHG.

#### **c. Actualización de los costos por parte de la Empresa de Acueducto y Alcantarillado de Bogotá - E.A.A.B.**

Resulta importante anotar que tanto los costos de HVM - IEHG (2007) como los de Estudios Técnicos y Construcciones Ltda. (2009), han sido objeto de actualización por parte de la Empresa de Acueducto y Alcantarillado de Bogotá - E.A.A.B., lo anterior teniendo en cuenta que hoy día se conoce como mayor precisión los valores de los interceptores por haber sido construidos como se señaló líneas atrás, y se cuenta con una estimación más detallada de la estación elevadora, así como del sistema de tratamiento.

Expediente No. 25000-23-27-000-2001-0479-01  
Acumulados Nos. 2000-0428, 2001-0122, 2001-0343  
Actor: GUSTAVO MOYA ÁNGEL Y OTROS  
Acción Popular

A diferencia del informe de la empresa Estudio Técnicos y Construcciones Ltda. la E.A.A.B. compara no la alternativa de Canoas frente a la alternativa 3 - Carboneras, sino Canoas frente a la alternativa 2 - Charquito Carboneras. Adicionalmente, presenta un ajuste en lo atinente al caudal esperado denominándolo en la tabla "escenario ajustado" - de 14 y 9 m³/s. Precisa la empresa distrital que el caudal de 9 m³/s surge de una recomendación de la Gerencia del Plan Maestro, que considera que en la actualidad y en el corto plazo no se sobrepasarán los 9 m³/s de aguas residuales en las cuencas de Fucha y Tunjuelo, teniendo en cuenta que en la Ptar Salitre ampliada se tratarán 7,1 m³/s. Por tanto, concluye que para evitar una "capacidad ociosa" en la nueva planta se considera que su capacidad de tratamiento en una primera fase no debe ser superior a 9 m³/s<sup>159</sup>.

Los comparativos de costos presentados por la E.A.A.B. son los siguientes:

Costos del programa actual de tratamiento de las aguas residuales de Bogotá

| Descripción                      | Ptar Salitre     | Ptar Canoas      | Total            |
|----------------------------------|------------------|------------------|------------------|
| Caudal (m3/seg)                  | 7,1              | 14               | 21,1             |
| Altura de elevación (m)          | 4                | 40               |                  |
| <b>Costos de infraestructura</b> |                  |                  |                  |
| Planta de tratamiento primario   | 371.180*         | 956.478          | 1.327.658        |
| Planta de tratamiento secundario | 721.338          | 1.561.000        | 2.282.338        |
| Estación elevadora               |                  | 327.000          | 327.000          |
| Interceptores (IFT-ITC)          |                  | 404.000          | 404.000          |
| <b>Total</b>                     | <b>1.092.518</b> | <b>3.248.478</b> | <b>4.340.996</b> |
| <b>Costos de operación</b>       |                  |                  |                  |
| Energía de estación elevadora    | 1.200            | 26.127           | 27.327           |
| Estación elevadora               |                  | 3.600            | 3.600            |
| Planta tratamiento               | 33.600           | 58.800           | 92.400           |
| <b>Total</b>                     | <b>34.800</b>    | <b>88.527</b>    | <b>123.327</b>   |
| Costos a 25 años t=13,48%        | 286.549          | 713.682          | 994.231          |
| <b>Total general 25 años</b>     | <b>1.373.067</b> | <b>3.962.160</b> | <b>5.335.227</b> |

Fuente: EAAB 2012 \*Este costo incluye la totalidad de lo pagado a BAS por construcción de PTAR Salitre I Fase, por indemnización debida a la terminación unilateral anticipada del contrato de concesión.

<sup>159</sup>Según la E.A.A.B. Para la planta de El Salitre, el estudio de EPAM en 1993 estimó una caudal de saturación de 6,8 m³/s. y por recomendación de la empresa, ese primer módulo de la planta se construyó para 4 m³/s, y el caudal medio de la cuenca durante los últimos 10 años ha sido de 3,9 m³/s.

Expediente No. 25000-23-27-000-2001-0479-01  
Acumulados Nos. 2000-0428, 2001-0122, 2001-0343  
Actor: GUSTAVO MOYA ÁNGEL Y OTROS  
Acción Popular

Costos Asociados al movimiento de tierra

| Volumen    | Vr<br>Unitario | Alternativa 1    |                                     | Alternativa 2    |                                     |
|------------|----------------|------------------|-------------------------------------|------------------|-------------------------------------|
|            |                | Cantidad<br>(m3) | Vr.<br>Total<br>(millones de<br>\$) | Cantidad<br>(m3) | Vr.<br>Total<br>(millones de<br>\$) |
| Excavación | 6.000          | 2.653.327        | 15.920                              | 15.473.028       | 92.838                              |
| Relleno    | 39.648         | 237.986          | 9.436                               | 610.064          | 24.188                              |
| Total      |                |                  | 25.356                              |                  | 117.026                             |

Tabla 8. Comparación de costos Canoas Vs Charquito (millones de pesos 2007)

| DESCRIPCIÓN                           | PTAR<br>Canoas | PTAR Charquito                   |                                             |
|---------------------------------------|----------------|----------------------------------|---------------------------------------------|
|                                       |                | Alternativa 1<br>(Solo Primario) | Alternativa 2<br>(Primario y<br>Secundario) |
| CUNDUCCIONES                          |                |                                  |                                             |
| Túnel Tunjuelo - Canoas               | 142.698        |                                  |                                             |
| Interceptor Soacha                    |                | 15.886                           | 15.886                                      |
| Túnel Tunjuelo - Charquito            |                | 121.347                          | 121.347                                     |
| Túnel Charquito - Carboneras          |                |                                  | 10.920                                      |
| Emisario Canoas- Alicachín            | 35.167         |                                  |                                             |
| SUBTOTAL CONDUCCIONES                 | 177.865        | 137.233                          | 148.153                                     |
| MOVIENTO DE TIERRAS PTAR              |                |                                  |                                             |
| Asociados a las excavaciones          | 60.278         | 15.920                           | 92.838                                      |
| Asociados a los rellenos              | 2.269          | 9.436                            | 24.188                                      |
| SUBTOTAL MOVIMIENTOS DE TIERRAS       | 62.547         | 25.356                           | 117.026                                     |
| CONDUCCIONES Y MOVIMIENTOS DE TIERRAS |                |                                  |                                             |
| SUBTOTAL CONDUCCIONES                 | 177.865        | 137.233                          | 148.153                                     |
| IMPREVISTOS (35%)                     | 62.253         | 48.032                           | 51.854                                      |
| SUBTOTAL MOVIMIENTO DE TIERRAS        | 62.547         | 25.356                           | 117.026                                     |
| TOTAL INVERSIÓN INICIAL               | 302.664        | 210.620                          | 317.033                                     |
| AIU (30%)                             | 90.799         | 63.186                           | 95.110                                      |
| TOTAL INVERSIÓN INICIAL + AIU         | 393.464        | 273.806                          | 412.143                                     |
| ESTACIÓN ELEVADORA                    |                |                                  |                                             |
| Inversión inicial                     | 72.318         | NO REQUIERE                      |                                             |
| Imprevistos (35%)                     | 25.311         |                                  |                                             |
| AIU (30%)                             | 29.289         |                                  |                                             |
| TOTAL ESTACIÓN ELEVADORA              | 126.918        |                                  |                                             |
| OPERACIÓN Y MANTENIMIENTO             |                |                                  |                                             |
| Costos de energía 25 años             | 82.797         | NO REQUIERE                      |                                             |

| DESCRIPCIÓN                     | PTAR<br>Canoas | PTAR Charquito                   |                                             |
|---------------------------------|----------------|----------------------------------|---------------------------------------------|
|                                 |                | Alternativa 1<br>(Solo Primario) | Alternativa 2<br>(Primario y<br>Secundario) |
| Mantenimiento 25 años           | 39.987         |                                  |                                             |
| TOTAL OPERACIÓN Y MANTENIMIENTO | 122.785        |                                  |                                             |
| RESUMEN FINAL                   |                |                                  |                                             |
| TOTAL INVERSIÓN INICIAL + AIU   | 393.464        | 273.806                          | 412.143                                     |
| TOTAL ESTACIÓN ELEVADORA        | 126.918        |                                  |                                             |
| TOTAL OPERACIÓN Y MANTENIMIENTO | 122.785        |                                  |                                             |
| TOTAL ALTERNATIVA               | 643.166        | 273.806                          | 412.143                                     |
| DIFERENCIA PORCENTUAL (%)       | 0%             | 57,4%                            | 35.9%                                       |

Fuente: HMV-IEHG2007

Tabla 11. Costos comparativos programa de saneamiento: Canoas Vs Charquito, con 14 y m³/s

Expediente No. 25000-23-27-000-2001-0479-01  
Acumulados Nos. 2000-0428, 2001-0122, 2001-0343  
Actor: GUSTAVO MOYA ÁNGEL Y OTROS  
Acción Popular

| Descripción                                           | Escenario actual |                |             | Escenario ajustado Charquito |                |             |
|-------------------------------------------------------|------------------|----------------|-------------|------------------------------|----------------|-------------|
|                                                       | Ptar Salitre     | Ptar Charquito | Ptar Canoas | Ptar Salitre                 | Ptar Charquito | Ptar Canoas |
| Caudal (m3/seg)                                       | 7.1              | 14             | 14          | 7.1                          | 9              | 9           |
| Altura de elevación (m)                               | 4                |                | 40          | 4                            |                | 40          |
| Costos Infraestructura (millones de pesos 2010)       |                  |                |             |                              |                |             |
| Planta de tratamiento primario                        | 371.180          | 956.478        | 956.478     | 371.180                      | 614.879        | 614.879     |
| Planta de tratamiento secundario                      | 721.338          | 1.561.000      | 1.561.000   | 721.338                      | 1.003.500      | 1.003.500   |
| Estación elevadora                                    |                  |                | 327.000     |                              |                | 327.000     |
| Interceptores (IFT+ITC)                               |                  | 404.000        | 404.000     |                              | 404.000        | 404.000     |
| Total                                                 | 1.092.518        | 2.921.478      | 3.248.478   | 1.092.518                    | 2.022.379      | 2.349.379   |
| Costos operación anual (millones de pesos 2010)       |                  |                |             |                              |                |             |
| Energía estación elevadora                            | 1.200            |                | 26.127      | 1.200                        |                | 26.127      |
| Estación elevadora                                    |                  |                | 3.600       |                              | 37.800         | 3.600       |
| Planta de tratamiento                                 | 33.600           | 58.800         | 58.800      | 33.600                       | 37.800         | 37.800      |
| Total                                                 | 34.800           | 70.545         | 88.527      | 34.800                       | 304.734        | 67.527      |
| Costo a 25 años t=13,48%                              | 280.549          | 474.031        | 713.682     | 280.549                      |                | 544.385     |
| Total general 25 años                                 |                  |                |             |                              |                |             |
|                                                       | 1.373.067        | 3.395.509      | 3.962.160   | 1.373.067                    |                | 2.893.764   |
| Diferencia a favor esquema ajustado vs esquema actual |                  |                |             |                              | -1.068.396     | -1.068.396  |
| Diferencia a favor de Charquito                       |                  | -566.651       |             |                              | -              |             |
| Diferencia total a favor de Charquito                 |                  | -566.651       |             |                              | -566.651       |             |
|                                                       |                  |                |             |                              | -1.635.047     |             |

ii.4.1. ANÁLISIS ECONÓMICO DE LAS TABLAS PRESENTADAS POR LA E.A.A.B.

Del análisis de cada una de las tablas presentadas por la Empresa de Acueducto y Alcantarillado de Bogotá - E.A.A.B., la Sala observa lo siguiente:

En primer lugar la E.A.A.B. señala que dado que el sitio de Carboneras se encuentra en terreno inclinado, el costo del movimiento de tierras para la construcción de la PTAR es

Expediente No. 25000-23-27-000-2001-0479-01  
Acumulados Nos. 2000-0428, 2001-0122, 2001-0343  
Actor: GUSTAVO MOYA ÁNGEL Y OTROS  
Acción Popular

significativamente mayor que en el caso de Canoas, tal como se muestra en la tabla 7. Al respecto, se considera que si bien es cierta la precisión de la Empresa, también lo es que dicha tabla no compara la alternativa Canoas frente a la alternativa 3 - Carboneras, sino las alternativas 1 y 2, que son Charquito tratamiento primario y Charquito - Carboneras tratamiento primario y secundario respectivamente. A pesar de que toma como fuente el estudio HMV - IEHG su referencia no se ajusta a lo señalado por el Consorcio en el año de 2007.

En la tabla 8 se comparan los costos de las alternativas de Canoas, Charquito y Charquito - Carboneras, de acuerdo con las estimaciones del estudio de HMV - IEHG (2007), al respecto la Sala se remite a las consideraciones realizadas con antelación sobre dicho comparativo, no sin antes precisar que los valores plasmados por la E.A.A.B. en la columna de la alternativa Ptar Canoas en los ítems, conducciones, movimiento de tierras y estación elevadora no corresponden a los plasmados en el informe del Consorcio, a pesar que los totales si concuerdan.

En la tabla 11 se realiza un comparativo entre la Ptar Salitre, Ptar Charquito y la Ptar Canoas, con los escenarios actuales y el ajustado que se explicó en la introducción de este numeral (ii.3.3.) los valores se actualizaron al año 2010.

Se observa que el valor del tratamiento primario como el secundario es el mismo, como se anotó en los numerales anteriores, el valor de las Ptar es igual independientemente del lugar donde se ubiquen:

- Tratamiento primario \$ 614.879 millones (escenario ajustado)
- Tratamiento Secundario \$ 1.003.500 millones (escenario ajustado)

Expediente No. 25000-23-27-000-2001-0479-01  
Acumulados Nos. 2000-0428, 2001-0122, 2001-0343  
Actor: GUSTAVO MOYA ÁNGEL Y OTROS  
Acción Popular

En lo atinente a los interceptores, la Sala recuerda que los mismos ya fueron construidos - *Interceptor Fucha Tunjuelo e Interceptor Tunjuelo Canoas* -, además que la infraestructura existente sirve en cualquiera de los escenarios, **sin embargo se requiere de obras adicionales de conexión las cuales no se encuentran en la tabla presentada por la Empresa.**

En efecto, de la desembocadura del túnel de desfogue o de emergencia construido y que descarga las aguas residuales en el sector aguas abajo de las puertas de Alicachín, se requeriría de un tubo aéreo para transportar las aguas a la Ptar del Charquito, lo anterior en razón a que la misma se encontraría ubicada en la margen izquierda del río Bogotá y las aguas del residuales llegan por el derecho. Adicionalmente, en la alternativa comparada por la empresa el tratamiento primario quedaría en Charquito y el secundario en Carboneras, para lo cual se requiere de un túnel adicional de flujo libre entre ambos, el cual tampoco se encuentra reflejado en la tabla; según el estudio de HMV - IEHG dicha estructura costaría alrededor de \$ 10.920 millones.

Igual suerte de la anterior corre el rubro referente a la reubicación de la vía que conduce al Municipio de Mesitas del Colegio y la canalización de la quebrada El Rodeo, las cuales según lo expuesto por el Consorcio HMV - IEHG pasan por el predio que estaría proyectado para la Ptar Charquito.

De otra parte y en lo atiente a la alternativa Canoas, se encuentra que ciertamente se requiere la construcción de una estación elevadora, aproximadamente 40 metros de elevación, el costo de la estructura sería \$ 327.000 millones, a los cuales se deben sumar los costos de operación y mantenimiento que según la E.A.A.B. rondarían los \$ 29.727 millones.

La diferencia según se desprende de la tabla entre las dos alternativas analizadas sería de \$ 566,651 millones, los cuales observando la distribución de las estructuras de

Expediente No. 25000-23-27-000-2001-0479-01  
Acumulados Nos. 2000-0428, 2001-0122, 2001-0343  
Actor: GUSTAVO MOYA ÁNGEL Y OTROS  
Acción Popular

tratamiento estaría fundamentalmente constituida por el valor de la estación elevadora y la operación y mantenimiento.

Ahora bien, no comparte la Sala la apreciación de la empresa en cuanto afirma que para cubrir los costos adicionales por movimientos de tierras cuenta con un "colchón" de \$ 233,495 millones, producto de la diferencia del costo final de la Ptar Salitre \$ 1.384.884 millones (*\$ 371.180 millones - tratamiento primario - ampliación y optimización a tratamiento secundario estimada en \$ 721.338 millones, para un total de \$ 1.384.884 millones para la infraestructura de tratamiento de 9m<sup>3</sup>/s, incluyendo el costo del m<sup>3</sup>/s que sería de \$ 153.876 millones*), y los \$ 1.618.379 millones estimados a partir de los costos de los estudios de HMV - IEHG, lo anterior por cuanto i) se trataba de proyecciones, ii) los recursos públicos que se ahorren no son "colchones" de libre disposición, por el contrario se sujetan a las normas presupuestales correspondientes para su asignación, ejecución y gasto, de acuerdo con los principios de planeación, economía, responsabilidad, transparencia, etc., iii) no es una argumento para la definición de la alternativa de ubicación de la planta sino que sería el valor final y la comparación de cada ítem.

En este contexto y de los valores presentados por la E.A.A.B., la Sala estima que para el tratamiento de las aguas residuales provenientes del río Bogotá resulta más económica la alternativa 2 - Charquito Carboneras - que Canoas, lo anterior a pesar de no haberse incluido en la tabla presentada por la E.A.A.B. el costo de las obras de conexión del túnel de desfogue con la Ptar Charquito y tampoco el costo del túnel de flujo libre entre ésta y la Ptar Carboneras - tratamiento secundario -, además del valor de la reubicación de la carretera que conduce al Municipio de Mesitas del Colegio y la canalización de la quebrada El Rodeo.

Expediente No. 25000-23-27-000-2001-0479-01  
Acumulados Nos. 2000-0428, 2001-0122, 2001-0343  
Actor: GUSTAVO MOYA ÁNGEL Y OTROS  
Acción Popular

Se repite, la diferencia de costos se circunscribe al valor de la estación elevadora y su operación y mantenimiento, conclusión igual a la que se llegó con el análisis de las cifras presentadas por HMV -IEHG (2007) y la empresa de Consultoría Estudios Técnicos y Construcciones Ltda. (2009).

Ahora bien y como se precisó, la Sala estima necesario pronunciarse sobre el embalse del Muña y la generación eléctrica para efectos de la toma de decisión en relación con la construcción de la estación elevadora que lleve las aguas a dicho lugar.

#### **d. El Embalse del Muña y la Generación Hidroeléctrica**

El embalse del Muña se construyó a finales de los años cuarenta, tenía originalmente una extensión de 950 ha, hoy día tiene aproximadamente 771 ha, lo anterior se debe al secado de las colas del embalse realizado con el fin de generar una barrera física - longitudinal entre la población del Municipio de Sibaté y el cuerpo de agua, además del proceso de terrización - *entiéndase por éste la consolidación de los suelos* - y relleno de la ribera del embalse.

El cuerpo principal del embalse recibe los caudales de los ríos Aguas Claras y Muña como proceso de regulación de sus aguas, junto con el bombeo del río Bogotá que se realiza a la altura del sitio denominado Alicachín en el extremo sur de la Sabana de Bogotá (bombeo que inició en 1967 - actualmente se bombea en promedio 33m<sup>3</sup>/s). En sus orígenes se utilizó como club de pesca, actividad que dejó de realizarse como consecuencia del deterioro progresivo de las condiciones del agua, hoy día se aprovecha para la generación de energía en la cadena Paraíso - Guaca.

Desde 1948 hasta el año de 1997 lo administró y gestionó la Empresa de Energía de Bogotá - E.E.B. En la actualidad, la empresa EMGESA - opera las dos (2) plantas generadoras de

Expediente No. 25000-23-27-000-2001-0479-01  
Acumulados Nos. 2000-0428, 2001-0122, 2001-0343  
Actor: GUSTAVO MOYA ÁNGEL Y OTROS  
Acción Popular

electricidad como resultado de la concesión otorgada en 1997 por la Corporación Autónoma Regional de Cundinamarca - CAR.

El embalse dentro del sistema interconectado nacional eléctrico cumple un papel muy importante, su caída permite el aporte de energía de 600MW distribuidos en 324 MW Paraíso y 276MW Guaca. En aras de observar la relevancia de esta cadena de generación, la Sala hará las siguientes consideraciones:

#### **ii.5.1. SISTEMA ELÉCTRICO COLOMBIANO**

El sistema eléctrico Colombiano está compuesto fundamentalmente por las actividades de generación, interconexión, transmisión, distribución y comercialización de electricidad.

El Ministerio de Minas y Energía, en ejercicio de las funciones de regulación, planeación, coordinación y seguimiento de todas las actividades relacionadas con el servicio público de electricidad, le corresponde definir los criterios para el aprovechamiento económico de las fuentes convencionales y no convencionales de energía, dentro de un manejo integral eficiente, y sostenible de los recursos energéticos del país, y debe promover el desarrollo de tales fuentes y el uso eficiente y racional de la energía por parte de los usuarios - *artículo 2º Ley 143/93* -.

La electricidad como servicio público le impone al Estado las siguientes obligaciones (*artículo 3º Ley 143/93*):

- a. Promover la libre competencia en las actividades del sector;
- b. Impedir prácticas que constituyan competencia desleal o abuso de posición dominante en el mercado;
- c. Regular aquellas situaciones en que por razones de monopolio natural, la libre competencia no

Expediente No. 25000-23-27-000-2001-0479-01  
 Acumulados Nos. 2000-0428, 2001-0122, 2001-0343  
 Actor: GUSTAVO MOYA ÁNGEL Y OTROS  
 Acción Popular

garantice su prestación eficiente en términos económicos;

- d. Asegurar la protección de los derechos de los usuarios y el cumplimiento de sus deberes;
- e. Asegurar la adecuada incorporación de los aspectos ambientales en la planeación y gestión de las actividades del sector;
- f. Alcanzar una cobertura en los servicios de electricidad a las diferentes regiones y sectores del país, que garantice la satisfacción de las necesidades básicas de los usuarios de los estratos I, II y III y los de menores recursos del área rural, a través de los diversos agentes públicos y privados que presten el servicio;
- g. Asegurar la disponibilidad de los recursos necesarios para cubrir los subsidios otorgados a los usuarios de los estratos I, II y III y los de menores ingresos del área rural, para atender sus necesidades básicas de electricidad

En cuanto a los objetivos, el Estado debe (*artículo 4º Ley 143/93*):

- a) Abastecer la demanda de electricidad de la comunidad bajo criterios económicos y de viabilidad financiera, asegurando su cubrimiento en un marco de uso racional y eficiente de los diferentes recursos energéticos del país;
- b) Asegurar una operación eficiente, segura y confiable en las actividades del sector;
- c) Mantener y operar sus instalaciones preservando la integridad de las personas, de los bienes y del medio ambiente y manteniendo los niveles de calidad y seguridad establecidos.

Expediente No. 25000-23-27-000-2001-0479-01  
Acumulados Nos. 2000-0428, 2001-0122, 2001-0343  
Actor: GUSTAVO MOYA ÁNGEL Y OTROS  
Acción Popular

Los agentes económicos que deseen participar en las actividades de electricidad, deben sujetarse al cumplimiento de los anteriores objetivos.

En cuanto a las características del mercado eléctrico en Colombia, la Sala observa que es un mercado competitivo, el cual se encuentra compuesto por el denominado "mercado mayorista eléctrico", que según el artículo 11 de la Ley 143 es el de grandes bloques de energía eléctrica, en que generadores y comercializadores venden y compran energía y potencia en el sistema interconectado nacional, con sujeción al reglamento de operación. Este último es definido como el conjunto de principios, criterios y procedimientos establecidos para realizar el planeamiento, la coordinación y la ejecución de la operación del sistema interconectado nacional y para regular el funcionamiento del mercado mayorista de energía eléctrica. El ente regulador - la CREG - establece las reglas aplicables al mercado.

El mercado mayorista se divide en dos: i) la bolsa de energía - corto plazo - y ii) el mercado de contratos bilaterales - largo plazo -.

La bolsa de energía o de corto plazo es un mercado para el día, para las 24 horas del día siguiente, en el cual deben participar todas las generadoras registradas con reglas explícitas de cotización. En otras palabras, es aquel a través del cual diariamente se definen las transacciones para atender la demanda de los usuarios.

Los generadores entregan su energía a los comercializadores que la compran y la llevan al usuario. Es un mercado de horario y de alta volatilidad. Lo anterior en razón a que se organiza el recurso, cada uno de los generadores establece un precio para el día, lo oferta, y el operador en Colombia que

Expediente No. 25000-23-27-000-2001-0479-01  
Acumulados Nos. 2000-0428, 2001-0122, 2001-0343  
Actor: GUSTAVO MOYA ÁNGEL Y OTROS  
Acción Popular

es la empresa XM<sup>160</sup> ordena las plantas de generación de manera ascendente, de la más barata a la más costosa, con el fin de establecer el precio de bolsa, el valor a través del cual se compra la energía, en ese sentido se dice que es muy volátil por cuanto depende de las circunstancias del momento, verbigracia los fenómenos de la niña o del niño, es decir, con mucha o poca pluviosidad respectivamente.

Por su parte, el mercado de contratos bilaterales - cobertura de precios - es aquel mediante el cual se acuerdan entre las partes, generador - comercializador y comprador (comercializador), las condiciones de venta de la energía, esto es, cantidad y precio; en este sentido no se expone a quien está comprando a la volatilidad que sí se presenta en el mercado a corto plazo.

Ahora bien, para que funcione el mercado mayorista se debe garantizar la existencia del producto, esto es, energía, el mercado debe propender porque estén los generadores y la energía, para que se presente esta circunstancia se estableció un mecanismo denominado "cargo por confiabilidad" que no es otra cosa que el instrumento a través del cual se emiten las señales de largo plazo para que los generadores se instalen con la suficiente anticipación y así atender la demanda. Es un mecanismo que pretende generar la confiabilidad en el suministro de energía para el corto, mediano y largo plazo mediante las obligaciones de "energía firme", esto es, ellos se comprometen a entregar una energía al mercado para que el sistema siempre esté abastecido. Se trata de un seguro que tiene el sistema colombiano para atender las condiciones críticas de abastecimiento.

Teniendo en cuenta lo anterior, en Colombia existe el llamado Sistema Interconectado Nacional - SIN que no es otra cosa que

---

<sup>160</sup> Empresa de Servicios Públicos Domiciliarios filial de interconexión eléctrica s.a. operación y administración del mercado eléctrico colombiano no es autoridad, emite conceptos técnicos.

Expediente No. 25000-23-27-000-2001-0479-01  
Acumulados Nos. 2000-0428, 2001-0122, 2001-0343  
Actor: GUSTAVO MOYA ÁNGEL Y OTROS  
Acción Popular

el compuesto por los siguientes elementos conectados entre sí: las plantas y equipos de generación, la red de interconexión, las redes regionales e interregionales de transmisión, las redes de distribución, y las cargas eléctricas de los usuarios - artículo 11 Ley 143/93. Las características del sistema son las siguientes - cifras 2011 -:

|                                          |                                     |
|------------------------------------------|-------------------------------------|
| Población                                | Atiende a 44.5 millones de personas |
| Superficie                               | 550.000 km2                         |
| Capacidad instalada del sistema          | 14.420 MW                           |
| Demanda de potencia                      | 9.295 MW                            |
| Demanda de energía                       | 58.620 GWh                          |
| Crecimiento demanda 2010 - 2011          | 3%                                  |
| Usuarios en unidades habitaciones, otros | 11,5 millones                       |
| Cobertura del servicio de energía        | 95,6%                               |

Fuente: XM 2012

Como insumo importante para el SIN se encuentra la demanda de potencia y energía frente a la capacidad del sistema, en este sentido se debe garantizar que existan los suficientes generadores que proveen la energía necesaria para cubrir la demanda en Colombia, de lo cual se desprende la importancia del referido "cargo por confiabilidad".

En el sistema la capacidad instalada se divide en recursos hidráulicos, térmicos, menores y cogeneradores. Se encuentra que de los 14.420MW 9.185MW pertenecen a la generación hidráulica (63.7%), 4.545MW a la generación térmica (31.5%), menores 635 (4.4%) y 55 a cogeneradores (0.4%). Se resalta la dependencia e importancia de los primeros.

| RECURSO     | CAPACIDAD | % MW  | ENERGÍA | GWH % |
|-------------|-----------|-------|---------|-------|
| HIDRÁULICOS | 9.185     | 63.7% | 45.583  | 77.8% |
| TÉRMICOS    | 4.545     | 31.5% | 9.383   | 16.0% |
| Gas         | 3.053     |       |         |       |
| Carbón      | 991       |       |         |       |

Expediente No. 25000-23-27-000-2001-0479-01  
Acumulados Nos. 2000-0428, 2001-0122, 2001-0343  
Actor: GUSTAVO MOYA ÁNGEL Y OTROS  
Acción Popular

|                      |        |      |        |      |
|----------------------|--------|------|--------|------|
| Fuel - Oíl           | 314    |      |        |      |
| Combustóleo          | 187    |      |        |      |
| Acpm                 | 0      |      |        |      |
| <b>MENORES: 20MW</b> | 635    | 4.4% | 3.336  | 5.7% |
| Hidráulicos          | 533    |      |        |      |
| Térmicos             | 83     |      |        |      |
| Eólicos              | 18     |      |        |      |
| <b>COGENERADORES</b> | 55     | 0.4% | 317    | 0.5% |
| <b>TOTAL:</b>        | 14.420 |      | 58.619 |      |

Fuente: XM 2012

En este sentido, la Sala observa la importancia de la generación de energía hidráulica en el consolidado nacional, que según la tabla corresponde a un 63.7% del total, convirtiéndola en un factor de dependencia para el propio sistema, teniendo en cuenta por lo demás la demanda creciente del producto energía, que se espera que aumente más con la demanda de equipos de refrigeración de aire acondicionado en virtud del calentamiento global.

**ii.5.2. LA GENERACIÓN HIDROELÉCTRICA DE EMGESA A TRAVÉS DE LA CADENA PARAISO - GUACA**

Dentro del sistema de generación hidráulico se encuentra la cadena Paraíso - Guaca que administra la empresa Emgesa, a través de las aguas que bombea del río Bogotá al embalse del Muña. La capacidad es de 600MV frente a todo el sistema distribuidos así: 324MW y 276MW respectivamente.

La Sala encuentra, siguiendo los datos de la referida tabla, que la cadena en comento corresponde al 6.5% del parque de todas las generadoras hidráulicas, esto es, del 63.7% de participación en el sistema hidráulico y, dentro del total del sistema nacional interconectado - SIN tiene una importancia del 4.2%.

En lo atinente al área de influencia y según la empresa XM, la cadena se encuentra en la denominada región centro - área

Expediente No. 25000-23-27-000-2001-0479-01  
Acumulados Nos. 2000-0428, 2001-0122, 2001-0343  
Actor: GUSTAVO MOYA ÁNGEL Y OTROS  
Acción Popular

oriental, compuesta por Cundinamarca y Meta y la cadena concurre en un 25.4% en dicho sector (fl. 10626. Cdno 15).

Teniendo en cuenta lo mencionado del mercado mayoritario del contrato bilateral y del denominado cargo por confiabilidad, el sistema le asignó los siguientes porcentajes de obligación de energía firme a la cadena Paraíso - Guaca de la siguiente forma:

| OBLIGACIONES DE ENERGÍA FIRMA |         |                 |
|-------------------------------|---------|-----------------|
| GWH AÑO                       |         |                 |
| PERÍODO                       | SISTEMA | PARAÍSO - GUACA |
| DIC 11 - NOV 12               | 64.038  | 4.364<br>6.8%   |
| DIC 12 - NOV 13               | 73.204  | 4.494<br>6.1%   |
| DIC 13 - NOV 14               | 65.827  | 3.979<br>6.0%   |
| DIC 15 - NOV 16               | 78.156  | 4.494<br>5.8%   |

Fuente: XM 2012

La Sala recuerda que por energía firme se entiende la asignación que hace el sistema en aras de garantizar la energía a futuro en la región, manteniendo la confiabilidad total nacional.

En término de unidades, como lo señala la empresa XM, la cadena Paraíso - Guaca corresponde a seis (6) de un total de 26 en el área oriental (fl. 10827. Cdno. 15):

| UNIDADES | PESO | TOTAL equivalente disponible |
|----------|------|------------------------------|
| Guavio   | 2    | 10                           |
| Paraíso  | 1    | 3                            |
| Guaca    | 1    | 3                            |
| Chivor   | 1    | 8                            |
| Miel     | 1/3  | 1                            |
| Zipa     | ¼    | 1                            |
| Total    | -    | 26                           |

Fuente: XM 2012

Se observa que el peso de la cadena es significativo en relación con el área oriental.

Expediente No. 25000-23-27-000-2001-0479-01  
 Acumulados Nos. 2000-0428, 2001-0122, 2001-0343  
 Actor: GUSTAVO MOYA ÁNGEL Y OTROS  
 Acción Popular

### II.5.3. CONCEPTO TÉCNICO DE LA SALIDA DE LA CADENA DE GENERACIÓN PARAISO - GUACA DEL SISTEMA INTERCONECTADO NACIONAL - EMPRESA XM

La empresa XM filial de Interconexión Eléctrica S.A. E.S.P. - ISA tiene como actividad principal la operación y administración del mercado eléctrico colombiano, no se trata de una autoridad por lo que sus pronunciamientos se encuentran a nivel de conceptos técnicos especializados.

Con ocasión al requerimiento realizado por el Despacho Sustanciador sobre las implicaciones de la salida del sistema nacional interconectado la cadena de generación eléctrica Paraíso - Guaca, la empresa en comento precisó lo siguiente (fls. 10823 a 10841. Cdno. 15):

*"Objetivo: Analizar el impacto eléctrico y energético para el sistema eléctrico nacional de la salida de la cadena de generación Pagua.*

*"Análisis eléctrico*

*"La subárea "Bogotá" requiere de gran cantidad de potencia reactiva para una operación segura y con los niveles de calidad y seguridad en el Código de Operación. Resolución Creg 025 de 1995. Este requerimiento de potencia reactiva aumenta con la demanda, por tanto, a mayor demanda se requiere más compensación reactiva. Actualmente, este requerimiento de potencia reactiva es atendido mediante compensaciones y la programación de recursos de generación en el área, que de acuerdo con su peso y su oferta compiten para el control de tensiones. Sin la cadena Pagua, se retirarían del área seis unidades equivalentes para el control de tensiones.*

*"Considerando los escenarios de demanda máxima esperada para los años 2012 y 2013, en condiciones de red completa (sin mantenimiento y sin contingencias) y al menos 15 unidades equivalentes disponibles en el área, no se observa afectación en la atención de la demanda. Sin embargo, según el resultado del análisis, contingencia sencillas en el STN como Primavera - Bacatá 500 kv y San José de Guaviare 115*

Expediente No. 25000-23-27-000-2001-0479-01  
 Acumulados Nos. 2000-0428, 2001-0122, 2001-0343  
 Actor: GUSTAVO MOYA ÁNGEL Y OTROS  
 Acción Popular

kv, incumpliendo los criterios de calidad y seguridad definidos por la reglamentación vigente. Otra contingencia que llevaría al incumplimiento de los criterios es la contingencia sencilla Guavio - La Reforma 230 kv, afectando la demanda de los departamentos del Meta y del Guaviare. Actualmente, para soporte de tensión ante las dos contingencias descritas anteriormente se recomiendan 20 unidades equivalentes en toda el área de las cuales son obligatorias cuatro unidades de Pagua en períodos de demanda máxima.

"Con la entrada en servicio del proyecto Nueva Esperanza, se elimina el requerimiento de PAGUA en períodos de demanda máxima, pero aún se requiere alrededor de 19 unidades equivalentes para soporte de tensión. La entrada en servicio del proyecto Rubiales aumenta en una unidad el requerimiento de unidades equivalentes para soporte de tensión.

"La condición eléctrica del área se empeora si se consideran mantenimientos e indisponibilidades de los elementos de la red, haciendo menos flexible la operación y la coordinación de mantenimientos.

"Adicionalmente, los análisis muestran que sin la cadena PAGUA, en la subárea Tolima se reduce inyección desde el transformador de la Guaca 230/115 kv, haciendo necesario la programación del recurso Prado para dar soporte de tensiones en la subárea.  
 (...)

"Análisis energético (...)

"Los resultados obtenidos en la simulación para el período mayo de 2012 a abril del 2021, son:

"Al comparar la evolución del embalse agregado obtenido en las simulaciones con y sin Pagua se observa como el no contar con la generación de Pagua y las reservas que aportan al sistema los embalses de la cadena agregado Bogotá, implica un uso intensivo de los demás embalses del SIN, llevando a que al final de cada verano se presenten agotamientos de las reservas útiles, lo que conlleva a una operación al límite de los recursos hidráulicos.

En cuanto al índice de confiabilidad, precisa que "a pesar de que no contar con Pagua produciría un uso intensivo del recurso hidráulico se observa que no se tendría un impacto significativo en los índices de confiabilidad del SIN en el horizonte de 10 años, esto debido a que como se presenta se tendría una mayor participación de generación térmica.

Expediente No. 25000-23-27-000-2001-0479-01  
Acumulados Nos. 2000-0428, 2001-0122, 2001-0343  
Actor: GUSTAVO MOYA ÁNGEL Y OTROS  
Acción Popular

*"Se observa que se presenta un incremento de la generación térmica promedio cuando no se cuenta con Pagua, lo que conlleva aumentos importantes en los consumos promedios de gas termoeléctrico, tanto en la costa como en el interior del País. Ante un escenario pesimista de disponibilidad de gas natural a futuro, el retiro de Pagua podría implicar un mayor uso de combustibles líquidos en condiciones críticas de hidrología.*

*"La exigencia del parque térmico sería mayor con el retiro de Pagua en caso de presentarse un escenario de crecimiento de demanda superior al considerado o de presentarse exportaciones internacionales, lo que llevaría a un mayor consumo de combustibles".*

#### **II.5.4. ANÁLISIS Y CONCLUSIONES DEL CONCEPTO TÉCNICO DE LA SALIDA DE LA CADENA DE GENERACIÓN PARAISO - GUACA DEL SISTEMA INTERCONECTADO NACIONAL - EMPRESA XM**

De lo expuesto, la Sala encuentra que la cadena se encuentra dentro de la región centro - área oriental, conformada por los Departamentos de Cundinamarca y Meta y que la misma se encuentra conectada a través de líneas con las áreas de Antioquia - San Carlos, nordeste y suroccidental.

Se observa que la capacidad total instalada en el oriente es de 3.1 GW y si se compara con la demanda de esa área que es del orden de 2.4GW, se encuentra que existe un excedente de energía eléctrica de 0.7GW, lo anterior representa una posibilidad de exportación o incluso de importación en caso de hidrologías bajas.

Resulta para la Sala importante señalar que la generación hidráulica para todo el Sistema Interconectado Nacional es del orden del 9.185MW, por lo que el gran componente de generación eléctrica del país está fundamentado en generación hidráulica, en los últimos 15 años la generación hidráulica ha cubierto el 78% de la demanda.

Expediente No. 25000-23-27-000-2001-0479-01  
Acumulados Nos. 2000-0428, 2001-0122, 2001-0343  
Actor: GUSTAVO MOYA ÁNGEL Y OTROS  
Acción Popular

De esa participación de generación hidráulica el componente de la cadena río Bogotá Tominé, Sisga, Neusa, Chuza y Muña, corresponde a un 33%, 5.093 GWh

En este sentido, para la Sala la cadena Pagua no es un sistema aislado, lo anterior en razón a que se encuentra conectado a través del sistema de transmisión nacional, el cual requiere de un perfil de tensión adecuado. En cuanto éste último punto, se precisa que el sistema energético cuenta con unos puntos especiales de tensión, los cuales deben mantenerse en niveles altos, permitiendo que cuando se reciba el producto en cada una de las tomas, la tensión resulte adecuada de acuerdo a la calidad que se establece en la reglamentación correspondiente.

Según XM cuando se presenten escenarios de demanda máxima con la salida de Pagua en condiciones de red completa, esto es, sin mantenimiento y sin contingencias, no se presenta afectación en la atención de la demanda. Sin embargo, precisó que cualquier contingencia sencilla en el SIN daría como resultado el incumplimiento de los criterios de calidad y seguridad definidos.

Para ilustrar mejor el escenario y siguiendo la explicación del mantenimiento de la tensión en SIN, en caso de contingencias mínimas como las referidas en el escrito de XM, se recomienda la existencia de 20 unidades de las cadenas que hacen parte del área oriental en aras de mantener la confiabilidad, entonces de las 26 unidades actuales con la salida de Pagua quedarían 20, por lo que se llevaría al límite la estructura eléctrica de la zona.

Con la entrada en servicio del proyecto Nueva Esperanza, que se espera para finales del año en curso o principios del próximo - 2014, XM considera que se eliminaría el requerimiento de Pagua en períodos de demanda máxima, pero afirmó que aún se requiere alrededor de 19 unidades

Expediente No. 25000-23-27-000-2001-0479-01  
Acumulados Nos. 2000-0428, 2001-0122, 2001-0343  
Actor: GUSTAVO MOYA ÁNGEL Y OTROS  
Acción Popular

equivalentes para soporte de tensión, por lo que las unidades que aporta Paraíso - Guaca resultan relevantes.

Adicionalmente, asevera XM que con la entrada en servicio del proyecto Rubiales aumenta en una unidad el requerimiento de unidades equivalentes para soporte de tensión, pero al igual que en el anterior escenario las mismas no resultan suficientes frente a las seis (6) que aporta la cadena en estudio.

Por lo expuesto, para la Sala es claro que la condición eléctrica del área oriental se mantiene en niveles adecuados de tensión con la cadena Pagua, en aquellos casos de mantenimiento de alguna de las redes, dicha cadena la haría más confiable y flexible.

Hay que diferenciar entre la potencia y la energía en el caso de la generación hidráulica, la potencia hace referencia a la existencia en este caso de tener dos plantas: Paraíso y Guaca en el orden de 600MW, y la energía le da la posibilidad de tener continuamente el combustible que es el recurso, es decir, el agua. En caso de no contar con el agua no se podría obtener la potencia requerida para el SIN.

De otro lado, se encuentra que si bien es cierto que en los próximos 10 años con la expansión del sistema eléctrico y aumento de la generación térmica la salida de Pagua podría tener un impacto menor, también lo es que una crisis de gas implicaría en términos de XM un uso de combustible líquido en condiciones críticas. De esta manera, para la Sala el mantenimiento de la cadena robustece el sistema.

Las conclusiones y recomendaciones del informe presentado por XM son las siguientes:

Desde el punto de vista eléctrico:

Expediente No. 25000-23-27-000-2001-0479-01  
Acumulados Nos. 2000-0428, 2001-0122, 2001-0343  
Actor: GUSTAVO MOYA ÁNGEL Y OTROS  
Acción Popular

- "Sin la cadena Pagua y sin considerar ningún proyecto de expansión, no es posible cumplir con los criterios de calidad y seguridad definidos en el código de operación en los escenarios de demanda máxima esperados en el 2012 y 2013, en cuanto a que las tensiones deben permanecer dentro de un rango ante contingencias sencillas.
- "El proyecto Nueva Esperanza elimina la dependencia de la generación de Pagua, pero no elimina el requerimiento mínimo de unidades para control de tensión del área (19 unidades equivalentes necesarias). El proyecto Rubiales exige una unidad adicional para control de tensión (20 unidades equivalentes necesarias).
- "Sin la cadena Pagua, la coordinación de mantenimientos de los demás recursos de generación se hace menos flexible ya que en períodos de demanda máxima se requiere 100% disponibles los demás recursos.
- "Sin la cadena Pagua, en la subárea Tolima se reduce la inyección desde el transformador de La Guaca 230/115 kv, haciendo necesario la programación del recurso Prado para dar soporte de tensiones en la subárea.

Desde el punto de vista energético:

- "No se observa impacto significativo en los índices de confiabilidad del SIN, en el horizonte de 10 años. Sin embargo, la operación observada con el retiro de Pagua implica un uso intensivo de los demás embalses del SIN, con lo cual al final de cada verano se presentan agotamientos de las reservas útiles, lo que conlleva a una operación al límite de los recursos hidráulicos.
- "La generación térmica promedio sin Pagua indica aumentos importantes en los consumos promedio de gas termoeléctrico, tanto en la costa como en el interior. Por tanto, ante escenarios de crecimiento superiores de demanda y de exportaciones internacionales, se requería mayores niveles de generación térmica y consumo de combustibles.
- "El retiro de la generación de Paraíso - Guaca conlleva al desaprovechamiento de las reservas de los embalses asociados a la cadena de Bogotá (Sisga, Neusa, Tominé, Chuza y Muña) las cuales totaliza en capacidad más de 5000 GWh. Actualmente, esta cantidad representa cerca de la tercera parte del embalse

Expediente No. 25000-23-27-000-2001-0479-01  
 Acumulados Nos. 2000-0428, 2001-0122, 2001-0343  
 Actor: GUSTAVO MOYA ÁNGEL Y OTROS  
 Acción Popular

*agregado nacional. En cuanto a energía firme, el recurso Pagua aporta 12.3 GWh de 92 GWh/día totales hidráulicos del SIN existentes hoy.*

- *"En caso de retirarse Pagua del sistema, se requeriría adelantar proyectos de generación en el corto plazo que sustituyan la energía que este recurso implica para garantizar la confiabilidad en la atención de la demanda nacional".*

#### **II.5.5. PROYECTOS MULTIPROPÓSITO Y APROVECHAMIENTO GENERAL DE LA CUENCA HIDROGRÁFICA**

En general, un proyecto es el conjunto de estudios (*técnicos, científicos, financieros, etc.*) sobre los antecedentes y circunstancias que inciden en la conveniencia o inconveniencia de ejecutar determinadas obras o actividades para lograr ciertos objetivos, todo conforme a determinados criterios de evaluación y viabilidad (*factibilidad técnica, económica, social, ambiental*).

Se desprende, entonces, que existen tantas clases de proyectos como objetivos puedan proponerse. Además y según el grado de complejidad, los proyectos pueden ser de un propósito único o de propósito múltiple. Estos últimos se orientan a producir más de un bien o servicio.

Dichos proyectos se diseñan y construyen a fin de que sirvan a más de una finalidad, y que con éstos se pueda lograr una mayor economía global. Esta es una de las razones por las cuales este tipo de proyectos son usualmente utilizados en el sector público, pues en muchas ocasiones las grandes cantidades de dinero y de recursos naturales que se ven involucrados en la construcción de una obra, hacen que ésta no se justifique por sí misma a menos que se atienda a múltiples propósitos.

Un ejemplo de lo anterior podría ser cuando se quiere realizar construcciones para la regulación de los ríos y conseguir con ello múltiples aprovechamientos hídricos, un

Expediente No. 25000-23-27-000-2001-0479-01  
Acumulados Nos. 2000-0428, 2001-0122, 2001-0343  
Actor: GUSTAVO MOYA ÁNGEL Y OTROS  
Acción Popular

objetivo indispensable es buscar que lo que en ellas se invierte y los recursos naturales que se involucran se aprovechen al máximo, además que los inevitables efectos negativos sean los mínimos posibles, característica propia de esta clase de proyectos. Se busca aprovechar los efectos positivos de los proyectos generando el máximo beneficio posible.

En lo atinente al aprovechamiento de las cuencas hidrográficas, se puede señalar que tiene por objetivo la generación de valores agregados a través de la integración de actividades productivas y ambientales, fundamentadas en la sostenibilidad del recurso hídrico.

Algunos ejemplos de los principales efectos positivos de la intervención civil en los ríos pueden ser:

- Control de inundaciones.
- Almacenamiento de agua para riego; uso humano, animal e industrial.
- Regulación de los caudales para permitir la navegación.
- Creación de un marco propicio para el turismo y la recreación.
- Posibilidades de generación de energía.
- Mejoramiento de las condiciones para la fauna acuática con el consiguiente incremento de sus posibilidades de aprovechamiento
- Implementación de herramientas de conservación de los recursos naturales

Asimismo, es innegable que este tipo de proyectos públicos aceleran la construcción de caminos y otras infraestructuras que pueden dar a los pobladores mayor acceso a los mercados para sus productos, escuelas para sus hijos, centros de atención médica y otros servicios sociales.

Expediente No. 25000-23-27-000-2001-0479-01  
Acumulados Nos. 2000-0428, 2001-0122, 2001-0343  
Actor: GUSTAVO MOYA ÁNGEL Y OTROS  
Acción Popular

**e. Obras y costos adicionales para el aprovechamiento hidroeléctrico  
en los sectores: Charquito y Carboneras**

Las alternativas de aprovechamiento hidroeléctrico derivadas de la ubicación de la segunda planta fueron estudiadas por el Consorcio HMV - IEHG de la siguiente manera:

*"Con el fin de realizar el aprovechamiento hidroeléctrico de las aguas tratadas sería necesario disponer de una estación elevadora adicional en el sitio de descarga de la planta de tratamiento con su correspondiente línea de impulsión, la cual se realizaría por medio de un túnel de bombeo. No se considera la opción de una tubería de acero a superficie libre, ya que dada la abrupta topografía de la zona es muy complicado disponer de una tubería superficial sin afectar de manera significativa el trazado de la vía existente y/o sin generar volúmenes de movimientos de tierras importantes que incrementarían de manera importante los costos de la conducción. Por esta razón, el Consorcio considera que la línea de impulsión debería realizarse por medio de un túnel de bombeo, por lo cual sus costos se estiman considerando únicamente la utilización de túneles de bombeo".*

**- Descripción de alternativas**

El Consorcio describió de manera detalladamente las características de cada una de las líneas de impulsión requeridas para cada alternativa.

**- Línea de impulsión Charquito - Alicachín (Alternativa 1)**

*"Se plantea para la alternativa 1, una línea de impulsión que permita llevar las aguas descargadas por el tratamiento primario ubicado en la zona del Charquito hasta aguas arriba de las compuertas de Alicachín, para ser bombeadas por la estación del Muña al embalse del mismo nombre y ser empleada para generación eléctrica por parte de EMGESA.*

Expediente No. 25000-23-27-000-2001-0479-01  
Acumulados Nos. 2000-0428, 2001-0122, 2001-0343  
Actor: GUSTAVO MOYA ÁNGEL Y OTROS  
Acción Popular

- **Línea de impulsión Carboneras - Alicachín**  
**(Alternativas 2 y 3)**

*"Se plantea para las alternativas 2 y 3, una línea de impulsión que permita llevar las aguas descargadas por el tratamiento secundario ubicado en la zona de Carboneras hasta aguas arriba de las compuertas de Alicachín, para ser bombeadas por la estación del Muña al embalse del mismo y ser empleada para generación eléctrica por parte de EMGESA.*

- **Condiciones de diseño para las alternativas**

El Consorcio en el cuadro 6.1. muestra las condiciones de diseño tomadas para las alternativas de las líneas de impulsión.

"CUADRO 1 Condiciones de diseño para las líneas de impulsión

|                                   | ALTERNATIVA 1    | ALTERNATIVA 2    |
|-----------------------------------|------------------|------------------|
| Longitud de la línea de impulsión | 1,081 m          | 2,860 m          |
| Cota succión estación elevadora   | 2,480 m.s.n.m    | 2,470 m.s.n.m    |
| Cota descarga                     | 2,541.39 m.s.n.m | 2,541.39 m.s.n.m |
| Caudal de diseño                  | 20.2 m³/s        | 20.2 m³/s        |

Para dimensionar las líneas de impulsión para cada alternativa, se dispusieron los siguientes componentes:

- Túnel de impulsión.
- Estación elevadora.
- **Túneles de bombeo**

**Sostenimiento de túneles de bombeo:**

*"De acuerdo con las evaluaciones realizadas, los costos de construcción por metro lineal de cada clase de terreno para un túnel sin blindaje de 3.7 m de diámetro se presentan en el siguiente cuadro:*

Expediente No. 25000-23-27-000-2001-0479-01  
Acumulados Nos. 2000-0428, 2001-0122, 2001-0343  
Actor: GUSTAVO MOYA ÁNGEL Y OTROS  
Acción Popular

"CUADRO. 2 Costos de construcción en terreno Clase III, \$/ml,  
(Diámetro = 3.7 m)

| Item | Descripción      | Unidad         | Cantidad | Precio Unit., \$ /m | Costo Total, \$ |
|------|------------------|----------------|----------|---------------------|-----------------|
| 1    | Excavación       | m <sup>3</sup> | 19.5     | 150,264             | 2.930.148       |
| 2    | Concreto lanzado | m <sup>3</sup> | 1.1      | 1,010,028           | 1.111.031       |
| 3    | Malla metálica   | m <sup>2</sup> | 11.0     | 12,193              | 134.123         |
| 4    | Pernos           | ml             | 11.0     | 58,978              | 648.758         |
| 5    | Concreto         | m <sup>3</sup> | 7.5      | 748,741             | 5.615.558       |
|      | Subtotal         |                |          |                     | 10.439.617      |

"CUADRO 3. Costos de construcción en terreno Clase IV, \$/ml,  
(Diámetro = 3.7 m)

| Item | Descripción      | Unidad         | Cantidad | Precio Unit., \$ /m | Costo Total, \$ |
|------|------------------|----------------|----------|---------------------|-----------------|
| 1    | Excavación       | m <sup>3</sup> | 20.3     | 175.123             | 3.554.997       |
| 2    | Concreto lanzado | m <sup>3</sup> | 1.8      | 1.010.028           | 1.818.050       |
| 3    | Malla metálica   | m <sup>2</sup> | 12       | 12.193              | 146.316         |
| 4    | Pernos           | Ml             | 12       | 58.978              | 707,736         |
| 5    | Arcos metálicos  | Kg             | 184      | 7.733               | 1.422.872       |
| 6    | Marchavantes     | Kg             | 10       | 7.733               | 77.330          |
| 7    | Concreto         | m <sup>3</sup> | 7.5      | 748.741             | 5.615.558       |
|      | Subtotal         |                |          |                     | 13.342.859      |

"CUADRO 4. Costos de construcción en terreno Clase V, \$/ml,  
(Diámetro = 3.7 m)

| Item | Descripción      | Unidad         | Cantidad | Precio Unit., \$ /m | Costo Total, \$ |
|------|------------------|----------------|----------|---------------------|-----------------|
| 1    | Excavación       | m <sup>3</sup> | 20.3     | 233.385             | 4.737.716       |
| 2    | Concreto lanzado | m <sup>3</sup> | 2.4      | 1.010.028           | 2.424.067       |

Expediente No. 25000-23-27-000-2001-0479-01  
Acumulados Nos. 2000-0428, 2001-0122, 2001-0343  
Actor: GUSTAVO MOYA ÁNGEL Y OTROS  
Acción Popular

|   |                 |                |     |         |            |
|---|-----------------|----------------|-----|---------|------------|
| 3 | Malla metálica  | m <sup>2</sup> | 16  | 12.193  | 195.088    |
| 4 | Pernos          | ml             | 26  | 58.978  | 1.533.428  |
| 5 | Arcos metálicos | kg             | 369 | 7.733   | 2.853.477  |
| 6 | Marchavantes    | kg             | 20  | 7.733   | 154.660    |
| 7 | Concreto        | m <sup>3</sup> | 7.5 | 748.741 | 5.615.558  |
|   | Subtotal        |                |     |         | 17,513,993 |

"Se asume que los tramos en la línea de impulsión que requieren blindaje son aquellos en los cuales la cobertura del terreno sea menor o igual al 40% de la altura de bombeo (ver FIGURA 4.1 y 4.2). No obstante, para determinar los requerimientos reales de blindaje se requieren realizar estudios geotécnicos más detallados.

Túnel Charquito - Alicachín:

"El trazado del túnel transcurre en rocas del Grupo Guadalupe, con posibilidad de que al inicio estén sanas pero al final se encuentren meteorizadas. Teniendo en cuenta el recubrimiento y la presión interna del túnel se estima que el tramo del túnel que debería blindarse es del 29% aproximadamente, es decir 313.49 metros. El costo por metro lineal de blindaje, se estima en \$ 7.810330, que corresponde al producto entre la cuantía de acero estimada (1,010 kg.) y el costo unitario por kilogramo de acero (\$ 7.733 / kg.). La clasificación de los terrenos que recorre el túnel Charquito - Alicachín, en función de las labores de excavación de túneles, y los costos estimados para un túnel de 3.7 metros de diámetro se presenta en el Cuadro 5.

"CUADRO 5. Costos estimados del Túnel Charquito - Alicachín  
(Diámetro = 3.7 m)

| Clase terreno           | Distribución | Longitud, | Costo      | Costo  |
|-------------------------|--------------|-----------|------------|--------|
| III                     | 42.1 %       | 455       | 10.439.617 | 4.752  |
| IV                      | 21.1 %       | 228       | 13.342.859 | 3.037  |
| V                       | 36.8 %       | 398       | 17.513.993 | 6.975  |
| Subtotal                |              | 1,081     | 11.494.909 | 14.763 |
| Blindaje                | 29 %         | 313       | 7.810.330  | 2.448  |
| Ítems no                |              |           |            | 4.303  |
| COSTOS                  |              |           |            | 21.515 |
| Imprevistos             |              |           |            | 7.530  |
| AIU (30%)               |              |           |            | 6.454  |
| TOTAL TÚNEL CHARQUITO - |              |           |            | 35.499 |

Expediente No. 25000-23-27-000-2001-0479-01  
Acumulados Nos. 2000-0428, 2001-0122, 2001-0343  
Actor: GUSTAVO MOYA ÁNGEL Y OTROS  
Acción Popular

Túnel Carboneras - Alicachín:

"El trazado del túnel se proyecta por la margen derecha del Río Bogotá, en rocas del Grupo Guadalupe, constituido por areniscas con algunas intercalaciones de arcillolitas. En el túnel deben aparecer zonas de roca meteorizada y algo de areniscas friables. Puesto que en ese trazado no ha habido reconocimiento directo, no es posible identificar los posibles sectores de rocas meteorizadas. Teniendo en cuenta el recubrimiento y la presión interna del túnel se estima que el tramo del túnel que debería blindarse es del 33% aproximadamente, lo que corresponde a una longitud de 943.8 metros. La clasificación de los terrenos que recorre el túnel Carboneras - Alicachín, en función de las labores de excavación de túneles, y los costos estimados para un túnel de 3.7 metros de diámetro se presenta en el Cuadro 6.

"CUADRO 6. Costos estimados del Túnel Carboneras - Alicachín  
(Diámetro = 3.7 m)

| Clase terreno                      | Distribución Porcentual | Longitud, m | Costo unitario, \$ | Costo Total, millones de \$ |
|------------------------------------|-------------------------|-------------|--------------------|-----------------------------|
| III                                | 16.7 %                  | 477         | 10.439.617         | 4.976                       |
| IV                                 | 8.3 %                   | 238         | 13.342,.859        | 3.180                       |
| V                                  | 75.0 %                  | 2,145       | 17.513.993         | 37.568                      |
| Subtotal                           |                         | 2,860       | 11.494.909         | 45.724                      |
| Blindaje                           | 33 %                    | 944         | 7.810.330          | 7.371                       |
| Ítems no considerados, 25%         |                         |             |                    | 13.274                      |
| COSTOS DIRECTOS                    |                         |             |                    | 66.369                      |
| Imprevistos (35%)                  |                         |             |                    | 23.229                      |
| AIU (30%)                          |                         |             |                    | 19.911                      |
| TOTAL TÚNEL CARBONERAS - ALICACHÍN |                         |             |                    | 109,.509                    |

- Estaciones Elevadoras

Determinación del número de unidades requeridas:

Siguiendo el estudio de HVM - IEHG:

Expediente No. 25000-23-27-000-2001-0479-01  
Acumulados Nos. 2000-0428, 2001-0122, 2001-0343  
Actor: GUSTAVO MOYA ÁNGEL Y OTROS  
Acción Popular

"El número de unidades requeridas se define seleccionando una bomba centrífuga con una capacidad inferior al caudal mínimo diario en tiempo seco buscando que siempre haya una bomba funcionando en la estación. Se estima que el caudal mínimo diario en tiempo seco (incluyendo aguas residuales e infiltración) es del orden de 10 m³/s; no obstante, dada la incertidumbre generada por la estimación de los caudales de infiltración y teniendo en cuenta el efecto de amortiguación de caudales generado por la Planta de Tratamiento, se asume que la capacidad requerida de cada bomba es  $q=7\text{m}^3/\text{s}$ . Considerando que el caudal de diseño es  $Q=20.34\text{m}^3/\text{s}$ , se determina el número de unidades requeridas:

$$\#Unidades = \frac{Q_{\text{diseño}}}{q} = \frac{20.34\text{m}^3/\text{s}}{7\text{m}^3/\text{s}} = 2.9 \approx 3 \text{ unidades}$$

"De acuerdo al numeral 6.2.3 de la norma técnica de Servicio NS-097 "Criterios de diseño de estaciones de bombeo de alcantarillado" elaborada por E.A.A.B. "Por cada (3) bombas instaladas, se instalará una de respaldo"; Para (3) tres unidades requeridas se instalara (1) una unidad de reserva, obteniendo una estación elevadora de (4) cuatro bombas centrífugas.

**Determinación de la altura total del bombeo:**

La altura de bombeo se define como se explicó en el numeral ii.1.2.1.1.

En el cuadro 6.9 el Consorcio presenta la altura de total de bombeo para cada una de las alternativas propuestas:

|                                                | Alternativa<br>1 | Alternativas<br>2 y 3 |
|------------------------------------------------|------------------|-----------------------|
| Altura estática (metros)                       | 62.39            | 72.39                 |
| Perdidas en la tubería de<br>descarga (metros) | 3                | 3                     |
| Perdidas en la línea de<br>impulsión (metros)  | 1.28             | 3.86                  |
| Altura total de bombeo (metros)                | 66.67            | 79.25                 |

**Costo estaciones elevadoras:**

Expediente No. 25000-23-27-000-2001-0479-01  
Acumulados Nos. 2000-0428, 2001-0122, 2001-0343  
Actor: GUSTAVO MOYA ÁNGEL Y OTROS  
Acción Popular

"Para determinar el costo de las bombas se toma una cotización hecha por **FERROSTAAL DE COLOMBIA Ltda.**, para la Planta de Tratamiento de Aguas Residuales Bello a nombre de **Empresas Públicas de Medellín, de fecha** 10 de Mayo del 2,007 Cuadro 7. Basados en experiencias previas se establece que el costo del motor es aproximadamente el 55% del costo del conjunto motobomba.

"CUADRO 7. Costos de motobombas tomados de la cotización  
NP.510-07-11.266 de FERROSTAAL DE COLOMBIA Ltda

| Tipo de bomba | Tamaño    | Peso (Kg) | Costo Motobomba (USD \$) | Costo Motor (USD \$) | Costo Bomba (USD \$) | US\$/Kg Bomba |
|---------------|-----------|-----------|--------------------------|----------------------|----------------------|---------------|
| SPY V         | 700-750AS | 2440      | \$203.390.00             | \$111.864.50         | \$91.525.50          | \$37.51       |
| SPY V         | 900-930AS | 4650      | \$246.390.00             | \$135.514.50         | \$110.875.50         | \$23.84       |
| SPY V         | 900-930AS | 4650      | \$25.990.00              | \$140.244.50         | \$114.745.50         | \$24.68       |

"Para determinar los costos de la estación elevadora requerida en cada una de las alternativas evaluadas se tomó como base el presupuesto establecido en el estudio de alternativas para la Estación Elevadora Tunjuelo elaborado por HMV en el año 2003 dentro del Estudio de Actualización del Plan Maestro de la cuenca del Fucha. En el Cuadro 8, en el cual se muestran los porcentajes de costo de cada ítem para una estación elevadora con bombas centrífugas, se puede apreciar que los costos de la estación elevadora están determinados por el costo de los equipos mecánicos, para los cuales se estimaron los porcentajes de cada ítem de acuerdo al costo del conjunto bomba y motor, tal como se muestra en el Cuadro 9.

"CUADRO 8. Porcentaje de costos para estación elevadora con bombas centrífugas

| ÍTEM | Porcentaje de costos |
|------|----------------------|
|------|----------------------|

Expediente No. 25000-23-27-000-2001-0479-01  
Acumulados Nos. 2000-0428, 2001-0122, 2001-0343  
Actor: GUSTAVO MOYA ÁNGEL Y OTROS  
Acción Popular

|                                         |     |
|-----------------------------------------|-----|
|                                         | (%) |
| Equipos mecánicos                       | 47% |
| Obra civil y elementos arquitectónicos  | 36% |
| Equipo eléctrico (incluida Subestación) | 11% |
| Obras complementarias                   | 5%  |
| Manejo ambiental e impacto urbano       | 1%  |

"CUADRO 9. Porcentaje de costos para equipos mecánicos en la estación elevadora con bombas centrífugas

| ÍTEM                                    | Porcentaje de costos (%) |
|-----------------------------------------|--------------------------|
| Bombas y motores                        | 90%                      |
| Puente grúa con accionamiento eléctrico | 1.5%                     |
| Rejas y maquinas limpiarrejas           | 3%                       |
| Compuertas                              | 3%                       |
| Auxiliares mecánicos                    | 0.5%                     |
| Repuestos                               | 2%                       |

"Dentro del costo estimado para la Estación Elevadora se incluye un porcentaje de costo para rejas y máquinas limpiarrejas con el objetivo de poder comparar la estación elevadora evaluada con la Estación Elevadora Canoas, aunque se especifica que la estación elevadora presentada en este informe llevará agua residual con tratamiento primario para la alternativa 1 y agua con tratamiento secundario para la alternativa 2, por lo cual el costo del equipo de cribado debería ir asociada a la Planta de Tratamiento y no a la Estación Elevadora.

"Tomando como base el factor calculado y los pesos calculados de las bombas se determina el costo de la bomba para cada alternativa. Este costo y los porcentajes definidos en el cuadro 8 y cuadro 9 permiten estimar el presupuesto para la Estación Elevadora requerida. En el cuadro 10 se observan los costos estimados de los equipos mecánicos.

"CUADRO 10. Costos estimados de los equipos mecánicos

| ÍTEM | Costo (Mill \$ Col) |       |
|------|---------------------|-------|
|      | ALT 1               | ALT 2 |

Expediente No. 25000-23-27-000-2001-0479-01  
Acumulados Nos. 2000-0428, 2001-0122, 2001-0343  
Actor: GUSTAVO MOYA ÁNGEL Y OTROS  
Acción Popular

|                                     |               |               |
|-------------------------------------|---------------|---------------|
| Bombas y motores                    | 20,181        | 23,616        |
| Puente Grúa accionamiento eléctrico | 336           | 394           |
| Auxiliares mecánicos                | 112           | 131           |
| Rejas y maquinas limpiarrejas       | 673           | 787           |
| Compuertas                          | 673           | 787           |
| Repuestos                           | 448           | 525           |
| <b>Total Equipos Mecánicos</b>      | <b>22,423</b> | <b>26,241</b> |

"Tomando como base el costo de los equipos mecánicos, se estiman los costos de cada uno de los ítems evaluados para la estación elevadora y el costo total de la estación elevadora Cuadro 11.

"CUADRO 11. Costos estimados de la estación elevadora

| ÍTEM                                   | Costo (Mill \$ Col) |               |
|----------------------------------------|---------------------|---------------|
|                                        | ALT 1               | ALT 2         |
| Equipos mecánicos                      | 22,423              | 26,241        |
| Obra civil y elementos arquitectónicos | 17,175              | 20,099        |
| Equipo eléctrico(incluida subestación) | 5,248               | 6,141         |
| Obras complementarias                  | 2,385               | 2,792         |
| Manejo ambiental e impacto urbano      | 477                 | 558           |
| <b>Total Costos Directos</b>           | <b>47,709</b>       | <b>55,831</b> |
| Imprevistos (35%)                      | 16,698              | 19,541        |
| AIU (30%)                              | 14,313              | 16,749        |
| <b>Total Estación Elevadora</b>        | <b>78,720</b>       | <b>92,121</b> |

Operación y mantenimiento:

a. Operación

"Para evaluar los costos de operación de la estación elevadora requerida, es necesario estimar el factor de uso sobre la capacidad de diseño, siguiendo los caudales medios estimados en el modelo de precipitación que presenta el Consorcio HMV - IEHG en el informe "Planteamiento y prediseño de alternativas y selección de alternativa básica Interceptor Tunjuelo - Canoas". De acuerdo a estos resultados, el caudal medio esperado es de 15.9 m³/s,

Expediente No. 25000-23-27-000-2001-0479-01  
Acumulados Nos. 2000-0428, 2001-0122, 2001-0343  
Actor: GUSTAVO MOYA ÁNGEL Y OTROS  
Acción Popular

por lo cual el factor de uso para un caudal de diseño de 20.2 m³/s es 79%.

"El costo anual por consumo de energía se calculó como el producto entre la potencia anual consumida en KW-h y el precio del KW-h, cuyo valor estimado es de \$ COL 180 / KW-h.

"La potencia anual consumida se determinó como la potencia requerida para bombear el caudal medio diario. Para evaluar el costo de operación a lo largo de la vida útil del proyecto se utiliza un período de 25 años de análisis y una tasa de interés efectivo de 12%. Los resultados encontrados se presentan en el Cuadro 12.

"CUADRO 12 Costos de operación Estación Elevadora (millones de pesos)

|                                | ALTERNATIVA 1 | ALTERNATIVAS 2 y 3 |
|--------------------------------|---------------|--------------------|
| Costo operación primer año     | 18,809        | 22,357             |
| <b>Costo operación 25 años</b> | <b>47,520</b> | <b>175,346</b>     |

b. Mantenimiento

"Los costos de mantenimiento se determinan como un porcentaje del costo de los equipos mecánicos. Teniendo en cuenta que el agua a bombear es agua proveniente de un tratamiento primario y/o secundario, se puede asumir que los costos de mantenimiento serán del orden del 10% de los costos de los equipos mecánicos.

"Para evaluar el costo de operación a lo largo de la vida útil del proyecto se utiliza un período de 25 años de análisis y una tasa de interés efectivo de 12%. Los resultados encontrados se presentan en el Cuadro 13.

"CUADRO 13. Costos de mantenimiento Estación Elevadora (millones de pesos)

| ÍTEM                               | ALTERNATIVA 1 | ALTERNATIVAS 2 y 3 |
|------------------------------------|---------------|--------------------|
| Costo equipos mecánicos            | 22,243        | 26,241             |
| Costo mantenimiento primer año     | 2,242         | 2,624              |
| <b>Costo mantenimiento 25 años</b> | <b>17,587</b> | <b>20,581</b>      |

Expediente No. 25000-23-27-000-2001-0479-01  
Acumulados Nos. 2000-0428, 2001-0122, 2001-0343  
Actor: GUSTAVO MOYA ÁNGEL Y OTROS  
Acción Popular

f. Análisis y conclusiones de la comparación de costos de las obras adicionales para el aprovechamiento hidroeléctrico - comparación: Canoas, Charquito y Carboneras

El Consorcio H MV - IEHG presenta en su estudio el siguiente cuadro comparativo de costos estimados de las obras adicionales requeridas que deberían ser llevadas a cabo para el aprovechamiento de las aguas tratadas del río Bogotá para la generación eléctrica.

| DESCRIPCIÓN                              | PTAR<br>Canoas | Alternativa<br>1 (PTAR<br>Charquito) | Alternativas<br>2 y 3<br>(PTAR<br>Carboneras) |
|------------------------------------------|----------------|--------------------------------------|-----------------------------------------------|
| Caudal de diseño<br>(m <sup>3</sup> /s)  | 34.7           | 20.34                                | 20.34                                         |
| Altura de bombeo<br>estimada (m)         | 37.4           | 66.7                                 | 78.7                                          |
| Línea de impulsión                       | No<br>require  | 19,770                               | 59,154                                        |
| Estación Elevadora                       | 72,318         | 47,709                               | 55,831                                        |
| COSTOS DIRECTOS                          |                |                                      |                                               |
| INVERSIÓN INICIAL                        | 72,318         | 67,749                               | 115,025                                       |
| Imprevistos (35%)                        | 25,311         | 23,618                               | 40,259                                        |
| INVERSIÓN INICIAL +<br>IMPREVISTOS       | 97,269         | 91,097                               | 155,284                                       |
| AIU (30%)                                | 29,298         | 27,329                               | 46,585                                        |
| INVERSIÓN INICIAL +<br>IMPREVISTOS + AIU | 126,918        | 118,426                              | 201,869                                       |
| Costos de operación<br>25 años           | 82,797         | 147,520                              | 174,113                                       |
| Costos de<br>mantenimiento 25 años       | 39,987         | 17,587                               | 20,581                                        |
| COSTOS DE OPERACIÓN Y<br>MANTENIMIENTO   | 122,785        | 165,107                              | 195,926                                       |
| TOTAL COSTOS<br>ALTERNATIVA              | 249,702        | 283,533                              | 397,795                                       |

Analizada la tabla, la Sala encuentra que la alternativa a menor costo de elevación para el aprovechamiento hidroeléctrico es Canoas con \$ 249.702 millones. Los valores presentados son a 2007 y no se encuentra estudio adicional o de actualización del mismo.

Expediente No. 25000-23-27-000-2001-0479-01  
Acumulados Nos. 2000-0428, 2001-0122, 2001-0343  
Actor: GUSTAVO MOYA ÁNGEL Y OTROS  
Acción Popular

Si bien es cierto que con el informe de Estudios Técnicos y Construcciones Ltda., el valor de la estación elevadora de Canoas sufrió una variación de mayor costo, también lo es que ello ocurriría con las demás alternativas, lo anterior se justifica en la medida que las características de los equipos de cada una de ellas son similares y la elevación es menor en Canoas y mayor en las demás opciones.

**g. Argumentos y conclusiones de decisión de la definición de la localización de la segunda planta de tratamiento**

La Sala concluye lo siguiente:

- Es viable la localización de la segunda planta de tratamiento tanto en Canoas, como en Charquito y Carboneras.

La alternativa de la PTAR Tunjuelo a pesar de ser expuesta por la E.A.A.B. debe ser descartada, lo anterior en la medida en que ya se construyeron los Interceptores Tunjuelo Canoas - Túnel de emergencia; adoptar una decisión diferente podría generar un detrimento patrimonial.

- **DESDE EL PUNTO DE VISTA ECONÓMICO** el análisis realizado sugiere que lo más ventajoso sería la construcción de la Ptar aguas abajo eliminando el bombeo y privilegiando la gravedad para la dirección de las aguas, aun cuando implique mayores costos asociados con el movimiento de tierras.

Resulta más económica la alternativa 2 - Charquito Carboneras - que Canoas, lo anterior a pesar de no haberse incluido en la tabla presentada por la E.A.A.B. el costo de las obras de conexión del túnel de desfogue con la Ptar Charquito y tampoco el costo del túnel de

Expediente No. 25000-23-27-000-2001-0479-01  
 Acumulados Nos. 2000-0428, 2001-0122, 2001-0343  
 Actor: GUSTAVO MOYA ÁNGEL Y OTROS  
 Acción Popular

flujo libre entra ésta y la Ptar Carboneras - tratamiento secundario -, además del valor de la reubicación de la carretera que conduce al Municipio de Mesitas del Colegio y la canalización de la quebrada El Rodeo.

La diferencia de costos se circunscribe al valor de la estación elevadora y su operación y mantenimiento, conclusión igual a la que se llegó con el análisis de las cifras presentadas por HMV -IEHG (2007) y la empresa de Consultoría Estudios Técnicos y Construcciones Ltda. (2009).

El costo referido únicamente a **DISTRIBUCIÓN O ESTRUCTURAS** que componen **la planta de tratamiento** resulta similar en Canoas, Charquito y Carboneras, por lo que el monto total de inversión en ese concepto no es determinante en la definición de la alternativa. No obstante, los costos derivados de administración resultan diferentes.

- **DESDE EL PUNTO DE VISTA DE PROYECTO MULTIPROPÓSITO** resulta más ventajosa la alternativa Canoas por cuanto produce más de un servicio y puede lograr una economía global. Permite el tratamiento de las aguas, su posterior utilización para la generación eléctrica, y el paso y caída del agua por las líneas de generación logra la oxigenación adicional del mismo.
- **DESDE EL PUNTO DE VISTA DE APROVECHAMIENTO Y DESARROLLO INTEGRAL DE LA CUENCA HIDROGRÁFICA** resulta más ventajosa la alternativa Canoas toda vez que genera valores agregados, a través de la integración de actividades productivas y ambientales, fundamentadas en la sostenibilidad del recurso hídrico.

Expediente No. 25000-23-27-000-2001-0479-01  
Acumulados Nos. 2000-0428, 2001-0122, 2001-0343  
Actor: GUSTAVO MOYA ÁNGEL Y OTROS  
Acción Popular

- **DESDE EL PUNTO DE VISTA TEMPORAL** resulta más ventajosa la alternativa Canoas, toda vez que a pesar de que no se han adquirido los predios donde se ubicaría, ya existe la declaratoria de utilidad pública de los mismos por parte del Municipio de Soacha, tal y como se precisará en acápites posteriores.
  
- **DESDE EL PUNTO DE VISTA INSTITUCIONAL** resulta más ventajosa la alternativa Canoas, en el entendido que a la fecha ya se han suscrito sendos convenios para su construcción:
  - a) Convenio Interadministrativo entre la Corporación Autónoma Regional de Cundinamarca - CAR, Distrito Capital - Secretaría de Ambiente - y Empresa de Acueducto y Alcantarillado de Bogotá - E.A.A.B. - (171 de junio de 2007), el objetivo es aunar esfuerzos para contribuir al saneamiento del río Bogotá en el marco del que se ha denominado "*Megaproyecto Río Bogotá*".
  - b) Acuerdo de cooperación para la construcción de la planta de tratamiento de aguas residuales de canoas (fase I y II y su estación elevadora dentro del programa de saneamiento del río Bogotá, en el contexto de la región Capital, Bogotá Cundinamarca. (21 de febrero de 2011).
  - c) Convenio Interadministrativo de Cooperación suscrito entre el Ministerio de Vivienda, Ciudad y Territorio, la Alcaldía Mayor de Bogotá y la Empresa de Acueducto y Alcantarillado de Bogotá, el cual tiene por objeto aunar esfuerzo para la ejecución el proyecto "*Construcción de la Estación Elevadora de Aguas residuales Canoas para el Distrito Capital de Bogotá*".
  - d) Convenio Interinstitucional entre Emgesa S.A. y E.S.P. y la Empresa de Acueducto y Alcantarillado de

Expediente No. 25000-23-27-000-2001-0479-01  
Acumulados Nos. 2000-0428, 2001-0122, 2001-0343  
Actor: GUSTAVO MOYA ÁNGEL Y OTROS  
Acción Popular

Bogotá E.S.P., que tiene por objeto aunar esfuerzos para garantizar la construcción de la Estación Elevadora Canoas, mediante aporte económico, de operación, mantenimiento y suministro de energía, por parte de Emgesa.

- **DESDE EL PUNTO DE VISTA FINANCIERO - INSTITUCIONAL** resulta más ventajosa la alternativa Canoas, lo anterior en razón a que se han apropiado recursos para la construcción de la estación elevadora a través del hoy Sistema General de Regalías, con destinación específica, tal y como se analizará en el siguiente componente.

### 3. Definición del nivel de tratamiento

Las aguas residuales provienen de múltiples fuentes - *domésticas, industriales, agropecuarias, entre otras*, se encuentran integradas por partículas contaminantes de diferentes tamaños y composición. La reutilización del recurso hídrico requiere de procesos de limpieza a diferentes niveles, los cuales dependen de la capacidad de asimilación del cuerpo receptor que se mide por su caudal promedio, por el grado de oxigenación y por la posibilidad de auto purificación. Además, se debe tener en cuenta el destino final del mismo, la finalidad del tratamiento de las aguas residuales va ligada a su uso.

Para la medición de la concentración de partículas contaminantes, el parámetro más utilizado es la demanda biológica de oxígeno - DBO -, que se define como la concentración de oxígeno disuelto consumido por los microorganismos presentes en el agua y se expresa en miligramos de oxígeno por litro -  $\text{mgO}_2/\text{l}$ .

El tratamiento de limpieza puede distinguirse hasta en tres etapas que comprenden procesos físicos, químicos y biológicos: i) tratamiento primario entendido como la

Expediente No. 25000-23-27-000-2001-0479-01  
Acumulados Nos. 2000-0428, 2001-0122, 2001-0343  
Actor: GUSTAVO MOYA ÁNGEL Y OTROS  
Acción Popular

remoción de sólidos a través del cribado o mallas de barreras, la flotación o eliminación de aceites y/o grasas y la sedimentación; ii) tratamiento secundario definido como la eliminación de impurezas con un tamaño menor que no puede ser removida por la decantación y cribado, comprende procesos biológicos aerobios y anaerobios y físico - químicos para reducir la mayor parte de DBO; iii) tratamiento terciario referido al proceso de reducción final de DBO, contaminantes químicos, metales pesados, eliminación de patógenos, entre otros.

Dicho lo anterior, en este acápite la Sala analizará la capacidad de asimilación del río frente a la carga contaminante depositada, la calidad del agua y los objetivos de calidad dentro del marco de usos finales del recurso hídrico en la cuenca hidrográfica, para así determinar el nivel de tratamiento requerido **según los estudios contratados e instrumentos normativos expedidos**. Para los fines anteriores se analizará el documento que contiene la modelación dinámica de la calidad del agua del monitoreo del río Bogotá elaborada por la Universidad Nacional en el 2011, se expondrán los objetivos de calidad contenidos en Acuerdo CAR 043 de 2006 y la estrategia plasmada en el plan de gestión ambiental de la CAR denominado "Estrategia de Adecuación Hidráulica y Recuperación Ambiental del Río Bogotá".

### **iii.1. OBJETIVOS DE CALIDAD AGUA 2020- ACUERDO CAR 043 DE 2006**

El artículo 42 de la Ley 99 de 1993 dispuso que la utilización directa o indirecta del agua *"para introducir o arrojar desechos o desperdicios agrícolas, mineros o industriales, aguas negras o servidas de cualquier origen, humos, vapores y sustancias nocivas que sean resultado de actividades propiciadas por el hombre, o actividades económicas o de servicios, sean o no lucrativas, se sujetarán*

Expediente No. 25000-23-27-000-2001-0479-01  
Acumulados Nos. 2000-0428, 2001-0122, 2001-0343  
Actor: GUSTAVO MOYA ÁNGEL Y OTROS  
Acción Popular

*al pago de tasas retributivas por las consecuencias nocivas de las actividades expresadas".*

El artículo 6° del Decreto 3100 de 2003 modificado por el Decreto 3440 de 2004 prescribió que "previo al establecimiento de las metas de reducción de una cuenca, tramo o cuerpo de agua, **la autoridad ambiental deberá entre otros aspectos establecer los objetivos de calidad de los cuerpos de agua** de acuerdo a su uso conforme a los Planes de Ordenación del Recurso Hídrico, determinando que para el primer quinquenio de cobro, en ausencia de los Planes de Ordenamiento del Recurso, las autoridades ambientales competentes podrán utilizar las evaluaciones de calidad cualitativas o cuantitativas del recurso disponible".

En atención a lo anterior, la Corporación Autónoma Regional de Cundinamarca - CAR, elaboró el Estudio "Propuesta de Metodología para la determinación de los objetivos de calidad de la cuenca del río Bogotá", el cual recogió las evaluaciones cualitativas y cuantitativas de calidad disponibles, y formuló una metodología para determinar los Objetivos de calidad para el río Bogotá, que contenía:

- Definición de la línea base a través de la identificación de los usuarios del recurso en la cuenca, y el cálculo de las cargas puntuales municipales en términos de Demanda Bioquímica de Oxígeno (DBO) y Sólidos Suspendidos Totales (SST).
- Diagnóstico del estado de la calidad de los cuerpos de agua de la cuenca, utilizando índices de calidad del recurso hídrico.
- Definición de los usuarios del recurso hídrico en la cuenca.
- Definición de escenarios de saneamiento de los cuerpos receptores y el estado futuro de la calidad del recurso hídrico en un horizonte proyectado al año 2020.

Expediente No. 25000-23-27-000-2001-0479-01  
Acumulados Nos. 2000-0428, 2001-0122, 2001-0343  
Actor: GUSTAVO MOYA ÁNGEL Y OTROS  
Acción Popular

- Definición de objetivos de calidad para el recurso hídrico con base en el análisis de la información anterior.

Con el fin de realizar la evaluación y diagnóstico de la calidad actual del agua del río Bogotá, su trayecto se dividió en cinco (5) tramos, en razón de sus características físicas y de uso, de la siguiente manera:

1. Cuenca Alta-Superior al sector comprendido entre Villapinzón y Tibitoc.
2. Cuenca Alta-Inferior entre Tibitoc y la estación hidrometeorológica la Virgen.
3. Cuenca Media entre la estación hidrometeorológica la Virgen y las compuertas Alicachín, en inmediaciones del embalse del Muña.
4. Cuenca Baja - superior desde El Embalse del Muña hasta la descarga del río Apulo.
5. Cuenca Baja Inferior desde la descarga del río Apulo hasta la desembocadura del río Bogotá en el Magdalena.

Al realizar el análisis de las condiciones en los cinco tramos definidos, el estudio concluyó:

• *"La **calidad del agua** de los cuerpos hídricos de la cuenca es buena en sus nacimientos y partes altas de las subcuencas, pero **a medida que aparecen los asentamientos humanos y las actividades productivas, se va degradando**. Es así como en la zona cercana al nacimiento del río Bogotá el nivel de oxígeno disuelto se encuentra por encima de 6.0 mg/L, valor suficiente para mantener condiciones aerobias que permitan la supervivencia de distintas especies. Desde el municipio de Villapinzón y hasta la descarga del embalse del Sisga, esta concentración presenta grandes oscilaciones, las cuales se ven notablemente mejoradas dada la capacidad autodepuradora del río y los aportes de los embalses de Tominé y Sisga. Por otra parte los valores de DBO y SST se encuentran por debajo de los 70 mg/L y 100 mg/L respectivamente.*

Expediente No. 25000-23-27-000-2001-0479-01  
Acumulados Nos. 2000-0428, 2001-0122, 2001-0343  
Actor: GUSTAVO MOYA ÁNGEL Y OTROS  
Acción Popular

• "Que en el trayecto de la cuenca alta inferior, la calidad del río se ve afectada al recibir los aportes del río Negro asociados con los vertimientos del municipio de Zipaquirá, la DBO se eleva hasta 150 mg/L con una tendencia ascendente hasta el municipio de Chía, donde el 60% de los vertimientos del municipio llegan al río a pesar que existe un previo tratamiento en la PTAR existente que recoge el 40% de la descarga que drena hacia el río Bogotá. Lo anterior debido al desbordado crecimiento poblacional en los últimos años de los centros poblados y al crecimiento productivo del sector.

• "Que en la cuenca media, se suman las descargas de los ríos Salitre, Fucha y Tunjuelo donde los parámetros de referencia adoptan valores altos, que para el caso de la DBO y los SST se encuentran alrededor de los 270 y 200 mg/l respectivamente, y donde la condición de anoxia en el río se hace presente durante la totalidad de este tramo, mostrando el gran impacto que la ciudad de Bogotá particularmente sus vertimientos causan sobre el río.

• "Que en la cuenca baja superior, se encuentra un nivel de oxígeno disuelto de aproximadamente 7.0 mg/L a consecuencia de la reaeración ocurrida en cerca de 1900 m de caída, en el río de Montaña bien sea pasando por el salto del Tequendama, o a través de la línea de conducción de la cadena de generación eléctrica. Igualmente en este tramo se registra un descenso en el valor de la DBO.

• "Que en la cuenca baja inferior, se registra un ascenso de los valores de DBO y SST así como una disminución del Oxígeno Disuelto la cual se puede explicar por la disminución en la capacidad de reaeración de la corriente debido a la baja pendiente en este tramo, la nitrificación (oxidación) de las diferentes especies de nitrógeno y de la degradación aeróbica de la materia orgánica.

• "Que en cuanto al comportamiento de los metales pesados, en la actualidad sus concentraciones a lo largo del río no son críticas desde el punto de vista de usos del río, a excepción de casos puntuales que implican una acción ambiental localizada, en las zonas donde se generan este tipo de contaminantes.

▪ "Dentro de los metales pesados de mayor relevancia se encuentra el Cromo, presentándose dos picos críticos correspondientes a los vertimientos de la industria de las curtiembres de los municipios de la cuenca alta y de la Cuenca del Tunjuelo.

Expediente No. 25000-23-27-000-2001-0479-01  
Acumulados Nos. 2000-0428, 2001-0122, 2001-0343  
Actor: GUSTAVO MOYA ÁNGEL Y OTROS  
Acción Popular

■ "El Plomo no presenta ninguna limitación para los usos agrícola y de generación de energía eléctrica, ya que su concentración únicamente sobrepasa el estándar de calidad para uso potable, que es muy estricto menor o igual a 0.05 mg/L.

■ "El Níquel y el Cadmio presentan a lo largo de todo el Río concentraciones muy bajas con respecto al estándar de calidad para los usos de consumo humano y agrícola, menor a 0.01 mg/L y 0.2 mg/L respectivamente.

● "Finalmente, el parámetro que merece más atención es el indicador de la **contaminación bacteriana**, es decir los **Coliformes Totales**, ya que su concentración es la más alta por encima del estándar de calidad para los diferentes usos, situación que se convierte en una limitante. **Es así como en la cuenca alta se encuentran valores entre los 3 y 5 órdenes de magnitud y en las cuencas media y baja se encuentran valores cercanos a los 9 órdenes de magnitud.**

Teniendo en cuenta lo anterior la CAR a través del ACUERDO 043 clasificó los usos del agua para la cuenca del río Bogotá y valores de los parámetros de calidad a aplicar por clase de la siguiente forma:

CLASE I: Corresponde a los valores de los usos del agua para consumo humano y doméstico con tratamiento convencional, preservación de flora y fauna, uso agrícola y uso pecuario.

CLASE II: Corresponde a los valores de los usos del agua para consumo humano y doméstico con tratamiento convencional, uso agrícola con restricciones y uso pecuario.

CLASE III: Corresponde a los valores asignados a la calidad de los Embalses, Lagunas, humedales y demás cuerpos lénticos de aguas ubicados dentro de la cuenca del río Bogotá.-.

CLASE IV: Corresponde a valores de los usos agrícola con restricciones y pecuario.

Expediente No. 25000-23-27-000-2001-0479-01  
Acumulados Nos. 2000-0428, 2001-0122, 2001-0343  
Actor: GUSTAVO MOYA ÁNGEL Y OTROS  
Acción Popular

CLASE V: Corresponde a valores de los usos para generación de energía y uso Industrial.

En el artículo segundo estableció para la cuenca alta, media y baja del río Bogotá, y con base en la clasificación de usos del agua para la cuenca del río Bogotá y valores de los parámetros de calidad a aplicar por clase, contemplados en los objetivos de calidad bajo condiciones hidrológicas promedio, los que se deben alcanzar en el año 2020.

### **iii.2. MODELACIÓN DINÁMICA DE LA CALIDAD DEL AGUA DEL MONITOREO DEL RÍO BOGOTÁ**

La modelación elaborada por la Universidad Nacional y contratada por la E.A.A.B. analiza diferentes escenarios en la cuenca alta, media y baja, en actividades conjuntas, que permiten estimar la capacidad de asimilación de la carga contaminante vertida al río y determinar sus condiciones actuales y prospectivas, sirviendo además de parámetro para la toma de decisión en lo que tiene que ver con la contratación y ejecución de obras para el saneamiento del cuerpo de agua.

El producto No. 5 del informe corresponde a la determinación y simulación de escenarios y análisis de resultados.

La metodología utilizada se centró en la presentación y modelación de escenarios que han sido planteados a nivel conceptual para el saneamiento del río, con el fin de evaluar el impacto en la calidad del río. Para los anteriores fines se formuló un escenario denominado "Condiciones actuales de Referencia" que sirvió de punto para el contraste con los demás escenarios.

Con posterioridad se definieron escenarios en la cuenca hidrográfica del río Bogotá de la siguiente manera:

Expediente No. 25000-23-27-000-2001-0479-01  
Acumulados Nos. 2000-0428, 2001-0122, 2001-0343  
Actor: GUSTAVO MOYA ÁNGEL Y OTROS  
Acción Popular

Lista de escenarios definidos con su respectivo nombre

| Cuenca/ Sub-cuenca                                     | Escenario No. | Nombre/Descripción                           |
|--------------------------------------------------------|---------------|----------------------------------------------|
| Cuenca Alta / Villapinzón<br>-Saucio                   | 1             | Condiciones actuales sin curtiembres         |
|                                                        | 2             | Condiciones actuales (CA)                    |
|                                                        | 3             | Condiciones críticas de curtiembres (CC)     |
|                                                        | 4.1           | Tratamiento Físicoquímico de curtiembres     |
|                                                        | 4.2.          | Tratamiento Biológico de curtiembres         |
|                                                        | 5             | Plan de Manejo de Vertimientos PMV(2035)     |
|                                                        | 6             | Condiciones Favorables (CF)/PMV (2035) y     |
|                                                        |               | Tratamientos industriales                    |
| Cuenca Alta / Saucio<br>Puente Gachancipá              | 7             | Condiciones actuales                         |
|                                                        | 8             | Condiciones críticas de curtiembres          |
|                                                        | 9             | Tratamientos industriales                    |
|                                                        | 10            | Condiciones Favorables (CF)/PMV (2035) e     |
|                                                        |               | Industriales.                                |
| Cuenca Alta / Puente<br>Gachancipá<br>Puente La Virgen | 11            | Condiciones actuales                         |
|                                                        | 12            | Condiciones críticas de curtiembres          |
|                                                        | 13            | Tratamientos Industriales                    |
|                                                        | 14            | Condiciones Favorables (CF) / PMV /(2035) e  |
|                                                        |               | Industriales                                 |
| Cuenca Media y Cuenca<br>Baja                          |               | <b>Condiciones actuales</b>                  |
|                                                        | 1             | Condiciones actuales                         |
|                                                        | 2             | Salitre Tratamiento Secundario (ST) y Canoas |
|                                                        |               | Tratamiento Primario (TP)                    |
|                                                        | 3             | Salitre TS Canoas TS (Desinfección)          |
|                                                        | 4             | Salitre TS Canoas TS (Desinfección) y sin    |
|                                                        |               | Tratamiento                                  |
|                                                        | 5             | Salitre TS Canoas TS y TP (Desinfección)     |
|                                                        |               | <b>Condiciones Criticas</b>                  |
|                                                        | 6             | Condiciones actuales                         |
|                                                        | 7             | Salitre TS Canoas TP                         |
|                                                        | 8             | Salitre TS Canoas TS (Desinfección)          |
|                                                        | 9             | Salitre TS Canoas TS (Desinfección) y sin    |
|                                                        |               | Tratamiento                                  |
|                                                        |               | <b>Condiciones Favorables</b>                |
|                                                        | 10            | Salitre TS Canoas TS y TP (Desinfección)     |
|                                                        | 11            | Condiciones actuales                         |
|                                                        | 12            | Salitre TS Canoas TP                         |
|                                                        | 13            | Salitre TS Canoas TS (Desinfección)          |
|                                                        | 14            | Salitre TS Canoas TS (Desinfección) y sin    |
|                                                        |               | Tratamiento                                  |
|                                                        | 15            | Salitre TS Canoas TS y TP (Desinfección)     |

Expediente No. 25000-23-27-000-2001-0479-01  
Acumulados Nos. 2000-0428, 2001-0122, 2001-0343  
Actor: GUSTAVO MOYA ÁNGEL Y OTROS  
Acción Popular

#### II.5.2.1. COMPARACIÓN Y ANÁLISIS DE ESCENARIOS EN LA CUENCA ALTA

En los **escenarios 1, 2 y 3 de la tabla, esto es, Cuenca alta Villapinzón - Saucío**, condiciones actuales sin curtiembres, condiciones actuales y condiciones críticas de curtiembre, el estudio concluyó:

- Si se presenta vertimiento mínimo de 8 curtimbres se agotaría totalmente el oxígeno disuelto de la corriente en algunos periodos y en promedio disminuirlo a valores de 3 mg/l en ese sector.
- En los tres escenarios se supera el valor de 7 mg/l.
- Los valores de nitrógeno amoniacal superan en todos los escenarios el valor 1mg/l
- La condición es similar para los sólidos suspendidos totales.

Recomendaciones: Recomendó que en la cuenca alta Villapinzón - Saucío se requiere la resolución de los impactos generados por los vertimientos de las curtiembres, además de los efluentes de las aguas residuales municipales de Villapinzón y Chocontá.

En los **escenarios 4.1 y 4.2 de la tabla, esto es, Cuenca alta Villapinzón - Saucío**, si se realizara tratamiento físico - químico de curtiembres o tratamiento biológico de curtiembres, la Universidad encontró las siguientes conclusiones:

- Con el tratamiento biológico se devuelve las condiciones aerobias a la corriente y salir de la condición anaerobia en las condiciones críticas de las curtiembres, esto es, vertimiento conjunto de más de 8 curtimbres.
- El tratamiento físico - químico no alcanza a generar esas condiciones aerobias.

Expediente No. 25000-23-27-000-2001-0479-01  
Acumulados Nos. 2000-0428, 2001-0122, 2001-0343  
Actor: GUSTAVO MOYA ÁNGEL Y OTROS  
Acción Popular

- El tratamiento físico - químico y biológico en ambos escenarios reduce el límite de nitrógeno amoniacal, reduce efectos potenciales de eutroficación, entiéndase como el exceso de minerales y nutrientes en un ecosistema acuático que pueden afectar negativamente la biodiversidad.

En los **escenarios 5 y 6 de la tabla, esto es, Cuenca alta Villapinzón - Saucío**, si existiera un plan de manejo de vertimientos PMV (2035) y condiciones favorables y tratamiento industrial, el informe preció que los resultados serían:

- En un 90% de tiempo se excede el valor de 3mg/l, incluso con o unidades de industrias de curtiembres descargando simultáneamente, si se llevan a cabo acciones planteadas en los PMV y tratamiento biológico de los efluentes de las curtiembres.

Recomendación: Recomendó que para reducir el potencial de eutroficación se deben realizar acciones de saneamiento en condiciones favorables. No se recomienda el uso agrícola, incluso si se implementan las acciones de condiciones favorables.

En el **escenario 8 de la tabla, esto es, Cuenca alta Saucío - Puente Gachancipá**, condiciones críticas de las curtiembres, el estudio concluyó:

- Los embalses de Tominé y Sisga alcanzan a devolver condiciones aerobias al río cuando descarga alto caudal, escenario húmedo, no pasa lo mismo en condiciones secas o de bajo caudal.
- Recuperación igual por la descarga de los embalses de Sisga y Tominé para nitrógeno amoniacal y coliformes totales.

Expediente No. 25000-23-27-000-2001-0479-01  
 Acumulados Nos. 2000-0428, 2001-0122, 2001-0343  
 Actor: GUSTAVO MOYA ÁNGEL Y OTROS  
 Acción Popular

En los **escenarios 11, 12, 13 y 14 de la tabla, esto es, Cuenca alta Puente Gachancipá - Puente la Virgen**, condiciones actuales, condiciones críticas de curtiembres, tratamientos industriales, condiciones favorables e industriales, el estudio develó lo siguiente:

- Perfil de oxígeno disuelto en la cuenca alta igualado o excedido al 90%, 50% y 10% del tiempo.
- Se presentan condiciones anaerobias con oxígeno disuelto casi cero en condiciones críticas y actuales
- Los valores máximos de nitrógeno son inferiores a 10mg/l, incluso en condiciones críticas.
- Curvas que exceden el 90%, 50% y 10% del tiempo de coliformes totales.
- Alta asimilación que realiza el río de los coliformes totales hasta la compuerta del Espino, aguas debajo de Tibitoc, siendo favorable para la captación con fines de potabilización.
- Alta contaminación a partir del río Negro que drena las aguas residuales de la PTAR de Zipaquirá y aguas residuales sin tratamiento del mismo ente territorial.
- A partir del KM 85 desde la entrada del afluente las aguas del río no se deben utilizar para riego agrícola ni para potabilización.

#### **iii.2.1. COMPARACIÓN Y ANÁLISIS DE ESCENARIOS EN LA CUENCA MEDIA Y BAJA SEGÚN LA MODELACIÓN**

En los **escenarios 1 a 15 de la cuenca media y baja de la tabla**, la conclusión sería:

- Condiciones favorables por obras de infraestructura de tratamiento en la cuenca alta y planta de tratamiento en Salitre y Canoas de 8 y 14 m<sup>3</sup>/s respectivamente, en la cuenca escenarios 11, 12 y 13 de la tabla, esto es, condiciones actuales, planta de Salitre con tratamiento secundario y Canoas con tratamiento primario, planta de

Expediente No. 25000-23-27-000-2001-0479-01  
Acumulados Nos. 2000-0428, 2001-0122, 2001-0343  
Actor: GUSTAVO MOYA ÁNGEL Y OTROS  
Acción Popular

Salitre con tratamiento secundario y Canoas con tratamiento secundario (desinfección), el río no alcanza las condiciones aerobias.

- Además de las plantas de tratamiento se requiere el mejoramiento de la condiciones de calidad del agua de los ríos afluentes Juan Amarillo, Fucha Tunjuelo, Soacha eliminando el máximo de conexiones erradas de aguas. Implementación del sistema de drenaje urbano sostenible.
- A pesar de que no se alcanzan condiciones aerobias, los tratamientos en Salitre y Canoas permiten reducir sustancialmente la carga de materia orgánica.
- La falta de remoción de nutrientes en la cuenca media en los tratamientos secundarios genera valores muy altos de amonio que impide junto con los valores medio de DBO de 20 mg/l que el río pueda tener en condiciones favorables, por lo que se requeriría que la planta de Salitre llegara a nivel de tratamiento terciario.
- Los valores altos de nutrientes de los efluentes de los tratamientos secundarios tienen impactos negativos si el agua es utilizada para riego agrícola.

En los **escenarios 1 a 15 de la cuenca baja de la tabla**, el producto 5 concluyó:

- Para el escenario 13, esto es, condiciones favorables con tratamientos secundarios en ambas plantas - Salitre Canoas - el río mantendría condiciones aerobias con valores mínimos y medios mayores a 1 mg/l hasta el km 330.
- Para los escenarios 12 y 13 de la tabla, esto es, planta de Salitre con tratamiento secundario y Canoas con tratamiento primario, planta de Salitre con tratamiento secundario y Canoas con tratamiento secundario (desinfección), la remoción de DBO y SST en el embalse de El Muña y la cuenca baja es prácticamente completa para valores promedio de concentración del río a la clase I.

Expediente No. 25000-23-27-000-2001-0479-01  
 Acumulados Nos. 2000-0428, 2001-0122, 2001-0343  
 Actor: GUSTAVO MOYA ÁNGEL Y OTROS  
 Acción Popular

- Para los escenarios 12 y 13 de la tabla, esto es, planta de Salitre con tratamiento secundario y Canoas con tratamiento primario, planta de Salitre con tratamiento secundario y Canoas con tratamiento secundario (desinfección), ocurre la nitrificación junto con la degradación de materia orgánica, genera consumo de oxígeno disuelto.
- Los valores de coliformes aplicándose desinfección a los efluentes secundarios tienen valores inferiores 5000 UFC/100ml, aspecto favorable para el tratamiento.

### **iii.3. PLAN DE GESTIÓN AMBIENTAL ADECUACIÓN HIDRÁULICA Y RECUPERACIÓN AMBIENTAL DEL RÍO BOGOTÁ - CORPORACIÓN AUTÓNOMA REGIONAL DE CUNDINAMARCA - CAR**

La Corporación Autónoma Regional de Cundinamarca - CAR elaboró el proyecto de Adecuación Hidráulica y Recuperación Ambiental del Río Bogotá, el cual se enmarca dentro de la estrategia para el manejo ambiental de la cuenca propuesto por el Consejo de Política Económica y Social - CONPES - documento 3320 y en los compromisos suscritos por ellos.

En ese sentido y en aras de controlar la contaminación hídrica mejorando la calidad del agua siguiendo los parámetros establecidos en el Acuerdo 043 de 2006 - objetivos de calidad para el 2020, realizó un análisis cuantitativo de escenarios de calidad del afluente evaluando las obras de saneamiento ambiental adelantadas por la entidad y los efectos de las plantas de tratamiento e interceptores de aguas residuales que construye la E.A.A.B. Los escenarios fueron los siguientes:

- Escenario 1. Obras de saneamiento cuenca alta y planta de tratamiento El Salitre con tratamiento secundario 8m<sup>3</sup>/s

Expediente No. 25000-23-27-000-2001-0479-01  
Acumulados Nos. 2000-0428, 2001-0122, 2001-0343  
Actor: GUSTAVO MOYA ÁNGEL Y OTROS  
Acción Popular

En relación con los objetivos de calidad: i) el oxígeno disuelto se cumple en el sector de Villapinzón - Tibitoc, ii) la demanda bioquímica de oxígeno se cumple en la mayor parte de Villapinzón - Tibitoc, Tibitoc - Alicachín, excepto inmediatamente después de la entrega de agua de los interceptores de agua residual de la ciudad, no se cumple en el sector Alicachín - Girardot, iii) para sólidos suspendidos no se cumple en el sector Villapinzón - Tibitoc, se cumple en el sector Tibitoc - Alicachín excepto inmediatamente después de la entrega de agua de los interceptores de agua residual de la ciudad, no se cumple en el sector Alicachín - Girardot.

- Escenario 2. Obras de saneamiento cuenca alta y planta de tratamiento El Salitre con tratamiento secundario 8 m<sup>3</sup>/s, más planta en Canoas, tratamiento secundario, 14 m<sup>3</sup>/s.

En relación con los objetivos de calidad: i) el oxígeno disuelto se cumple en el sector de Villapinzón - Tibitoc, ii) la demanda bioquímica de oxígeno se cumple en la mayor parte de Villapinzón - Tibitoc, Tibitoc - Alicachín, se cumple en el sector Alicachín - Girardot, iii) para sólidos suspendidos no se cumple en el sector Villapinzón - Tibitoc, se cumple en el sector Tibitoc - Alicachín excepto inmediatamente después de la entrega de agua de los interceptores de agua residual de la ciudad, se cumple parcialmente en el sector Alicachín - Girardot.

- Escenario 3. Sin obras de saneamiento cuenca alta y planta de tratamiento El Salitre con tratamiento primario 8 m<sup>3</sup>/s
- Escenario 4. Sin obras de saneamiento cuenca alta y planta de tratamiento El Salitre con tratamiento secundario 8 m<sup>3</sup>/s

Análisis del comportamiento escenarios 3 y 4.

Expediente No. 25000-23-27-000-2001-0479-01  
Acumulados Nos. 2000-0428, 2001-0122, 2001-0343  
Actor: GUSTAVO MOYA ÁNGEL Y OTROS  
Acción Popular

En relación con el oxígeno disuelto - OD, la construcción de la planta de El Salitre con tratamiento secundario no existe mejora sustancial en relación con los resultados del tratamiento a nivel primario.

En relación con la demanda bioquímica de oxígeno - DBO con la construcción de la planta de El Salitre con tratamiento secundario existe mejora sustancial.

En relación con los sólidos suspendidos totales - SST con la construcción de la planta de El Salitre con tratamiento secundario existe mejora sustancial.

- Escenario 5. Con obras de saneamiento cuenca alta y planta de tratamiento El Salitre con tratamiento primario, 8 m<sup>3</sup>/s

En relación con los objetivos de calidad: i) la concentración de oxígeno disuelto es similar a la del escenario 3, con o sin obras de PSMV. ii) la demanda bioquímica de oxígeno presenta mejoría frente al escenario 3, iii) para sólidos suspendidos presenta mejoría frente al escenario 3.

#### **iii.4. ARGUMENTOS Y CONCLUSIONES DE DECISIÓN DE LA DEFINICIÓN DEL NIVEL DE TRATAMIENTO PARA EL ESQUEMA DE SANEAMIENTO DE LA CUENCA SEGÚN LOS ESTUDIOS CONTRATADOS Y LOS INSTRUMENTOS NORMATIVOS EXPEDIDOS**

Teniendo en cuenta el Acuerdo 043 de 17 de octubre de 2006 expedido por la CAR "Por el cual se establecen los objetivos de calidad del agua para la cuenca del río Bogotá a lograr en el año 2020", la estrategia plasmada en el plan de gestión ambiental de la CAR denominado "*Estrategia de Adecuación Hidráulica y Recuperación Ambiental del Río Bogotá*" - 2009 y la modelación dinámica de la calidad del agua del monitoreo del río Bogotá elaborada por la Universidad Nacional en el 2011, la Sala concluye lo siguiente:

Expediente No. 25000-23-27-000-2001-0479-01  
Acumulados Nos. 2000-0428, 2001-0122, 2001-0343  
Actor: GUSTAVO MOYA ÁNGEL Y OTROS  
Acción Popular

- Para el cumplimiento de los objetivos de calidad fijados por la CAR se deben observar los resultados de los análisis de escenarios planteados relacionados con la calidad del agua del río Bogotá - modelación dinámica y modelo de calidad QUAL2Kw aplicado por la CAR -.
- El nivel de tratamiento primario químicamente asistido de la planta del Salitre no es suficiente para alcanzar los objetivos de calidad en el sector de la cuenca media y baja.
- El nivel de tratamiento de la planta del Salitre que mejores beneficios y resultados presenta en la cuenca media, es el tratamiento secundario, lo anterior en términos de reducción de la carga orgánica y los sólidos suspendidos totales. No se reporta mejoría después de la entrega de agua de los interceptores de agua residual de la ciudad, no se cumple en el sector Alicahín - Girardot. **No se analizó el escenario de la planta de El Salitre con nivel terciario en el trabajo realizado por la CAR.**

**Para la Universidad Nacional en su modelación, se debe implementar el máximo tratamiento posible y factible a todos los vertimientos de aguas residuales industriales y municipales. Considera necesario tratamiento terciario en la PTAR Salitre**

- Para el cumplimiento de los objetivos de calidad del río en la cuenca baja, (Clase IV y Clase V), es necesario la construcción de la planta aguas abajo de la cuenca media, con tratamiento secundario. Ambos estudios concluyen que debe existir proceso de tratamiento a nivel secundario con desinfección.
- Con la construcción de la PTAR aguas abajo, a nivel de tratamiento secundario, se podrán obtener condiciones aeróbicas en el Río Bogotá en toda su cuenca baja.

Expediente No. 25000-23-27-000-2001-0479-01  
Acumulados Nos. 2000-0428, 2001-0122, 2001-0343  
Actor: GUSTAVO MOYA ÁNGEL Y OTROS  
Acción Popular

En atención a lo anterior y como conclusión, las alternativas de tratamiento seleccionadas son:

- 1. Tratamiento secundario para la PTAR Salitre, se solicita evaluar las condiciones técnicas y económicas que permitan ampliar a tratamiento terciario.**

La Sala recuerda que el tratamiento en su segunda fase en la Ptar Salitre ya se encuentra seleccionado y en la actualidad el proceso se halla en etapa de precalificación del contratista que realizará "el diseño en detalle, construcción de las obras, suministro e instalación de equipos, puesta en marcha y operación asistida de la optimización y expansión de la planta".

Ciertamente se observa en el "Anuncio específico de Adquisiciones - llamado preclasificación préstamo Birf 7985 - CO#, que con el tratamiento biológico se empleará un proceso de lodos activados:

*"En relación con el tratamiento biológico se empleará un "proceso de lodos activados, compuesto de tanques de aireación con una zona de selección anóxica, y de zonas aerobias, para un tiempo de retención total de alrededor de 5 horas. En dichas zonas aeróbicas se contempla una transferencia de oxígeno de alta eficiencia mediante un sistema difusor de burbuja fina. Con el fin de optimizar el desempeño y minimizar el consumo de energía eléctrica del sistema de sopladores de aireación, se monitorearán los niveles de oxígeno disuelto en las zonas aeróbicas. El licor mixto efluente de los tanques de aireación será distribuido hacia doce tanques de sedimentación finales. Adicionalmente, se proveerán sistemas de bombeo para llevar el 100% del Lodo Activado de Recirculación (RAS) hacia los tanques de aireación, y para transportar el Lodo Activado de Desecho (WAS) hacia los nuevos espesadores de gravedad por banda.*

*"El lodo primario espesado y el lodo activado de desecho (también espesado), serán estabilizados en digestores anaeróbicos mesofílicos. Para el*

Expediente No. 25000-23-27-000-2001-0479-01  
 Acumulados Nos. 2000-0428, 2001-0122, 2001-0343  
 Actor: GUSTAVO MOYA ÁNGEL Y OTROS  
 Acción Popular

procesamiento y estabilización tanto de los sólidos biológicos espesados, como de la corriente de espumas y grasas recolectada de los desarenadores aireados y de las unidades de sedimentación se emplearán ocho (8) digestores nuevos y tres (3) digestores existentes modificados, así como las obras asociadas necesarias para el proceso de mezcla. Los sólidos estabilizados serán deshidratados mediante un sistema de centrífugas. Los sólidos deshidratados (torta de lodos) serán llevados mediante un sistema transportador hacia silos de almacenamiento; posteriormente serán descargados en camiones y transportados por el operador de la planta, hacia un sitio de disposición en concordancia con las regulaciones ambientales vigentes. Se instalarán unidades de tratamiento de olores en el edificio de espesamiento de los lodos activados de desecho (espesadores de gravedad por banda), y en el edificio del sistema de deshidratación por centrifugado.

"El sistema de control del proceso y manejo de información será optimizado para poder integrar las instalaciones tanto nuevas, como existentes. Como es de esperarse, la adición de las nuevas unidades de proceso implica la necesidad de energía eléctrica adicional. La energía será llevada a la planta desde subestaciones de 115 KV pertenecientes a la entidad encargada de la distribución eléctrica; dicha tarea corresponde al Contratista. La distribución de energía en el sitio es de 11,4 KV. Los motores de las bombas de afluente y de los sopladores operan con un voltaje de 4.160 V. Los demás motores serán operados con voltajes de 460 V, o menos.

"Se proveerán obras para la recepción, dilución, almacenamiento y bombeo de hipoclorito de sodio líquido, con el fin de alimentar los nuevos tanques de desinfección con solución de cloro. Se instalará una estación de bombeo del efluente en la estructura de descarga, para elevar el efluente final cuando los niveles hidráulicos del Río Bogotá sean altos. Por otro lado, se construirán edificios adicionales para albergar el nuevo centro de control, el centro administrativo, la infraestructura de operación y mantenimiento, entre otros.

Con lo anterior y con la selección del sistema de lodos activados, la Sala encuentra sendas ventajas derivadas del nivel de tratamiento como lo manifestó la propia CAR<sup>161</sup>, no

---

<sup>161</sup> Con las ventajas del sistema seleccionado:

- Se amplía la experiencia a nivel mundial.

Expediente No. 25000-23-27-000-2001-0479-01  
Acumulados Nos. 2000-0428, 2001-0122, 2001-0343  
Actor: GUSTAVO MOYA ÁNGEL Y OTROS  
Acción Popular

obstante, según los estudios y en términos prospectivos se requiere la evaluación de la implementación de un tratamiento terciario.

2. Tratamiento secundario con desinfección para la PTAR aguas abajo.

4. Estado actual de los programas, proyectos, obras y cumplimiento de las órdenes de la sentencia de primera instancia para el saneamiento de la cuenca hidrográfica.

4.1. Situación General

Una vez analizado el esquema de saneamiento del río, resulta de suma importancia conocer el estado actual de las obras, programas, proyectos y, por supuesto, de las órdenes proferidas por el Tribunal de instancia. En este sentido, la Sala encuentra:

| OBRA                                                                                                                                         | RESPONSABLE                                                | ESTADO ACTUAL     | COSTO | OBSERVACIONES |
|----------------------------------------------------------------------------------------------------------------------------------------------|------------------------------------------------------------|-------------------|-------|---------------|
| Diseño, construcción y ejecución de planes maestros de acueducto y alcantarillado en todos los municipios cuenca río Bogotá<br>(plazo: 2009) | Municipios<br><br>Gobernación de Cundinamarca<br><br>MAVDT | NO SE HA CUMPLIDO |       |               |
| Separación de redes pluviales de las del alcantarillado<br>(plazo: 2009)                                                                     | Municipios<br><br>Distrito Capital                         | NO SE HA CUMPLIDO |       |               |

- Capacidad para tratar efluentes con altas concentraciones de DBO soluble.
- Buena confiabilidad de las unidades de proceso.
- Mínimo riesgo de producción de olores por reducción de tiempo de estadía en la planta y por disponer de condiciones aerobias en el proceso.
- El sistema permite flexibilidad en la operación cuando se presenta grandes variaciones de carga orgánica e hidráulica.
- Adaptabilidad a las variaciones extremas de caudal.

Expediente No. 25000-23-27-000-2001-0479-01  
Acumulados Nos. 2000-0428, 2001-0122, 2001-0343  
Actor: GUSTAVO MOYA ÁNGEL Y OTROS  
Acción Popular

|                                                                                                                                                                           |                                              |                   |  |                                                                                                                                                                                                        |
|---------------------------------------------------------------------------------------------------------------------------------------------------------------------------|----------------------------------------------|-------------------|--|--------------------------------------------------------------------------------------------------------------------------------------------------------------------------------------------------------|
|                                                                                                                                                                           | E.A.A.B.                                     |                   |  |                                                                                                                                                                                                        |
| Obras y mejoras de plantas de tratamiento CAR. Municipios deberán comenzar a operarlas con cargo a tarifas. CAR podrá contratarlas y cobrarlas a municipios (plazo: 2007) | Municipios<br><br>CAR                        | NO SE HA CUMPLIDO |  | Se entregaron las Ptar a los municipios por la CAR. No se han mejorado ni optimizado                                                                                                                   |
| Caracterización físico-química y biológica de afluentes y efluentes de PTARs CAR                                                                                          | IDEAM                                        | NO SE HA CUMPLIDO |  |                                                                                                                                                                                                        |
| Construir PTAR requeridas para dar cobertura total a aguas residuales (plazo: 2007-2009)                                                                                  | Municipios                                   | NO SE HA CUMPLIDO |  |                                                                                                                                                                                                        |
| Ampliación PTAR Salitre 8 m3/s (con cargo a transferencias CAR 50% predial) (plazo:2009)                                                                                  | Distrito Capital<br><br>E.A.A.B.<br><br>DAMA | NO SE HA CUMPLIDO |  | Se aprobó préstamo con el Banco Mundial<br><br>se abrió la licitación pública internacional 01/2013 que se encuentra en etapa de preclasificación de oferentes para el componente de diseño de detalle |
|                                                                                                                                                                           | Distrito                                     |                   |  | Pendiente de definición en la                                                                                                                                                                          |

Expediente No. 25000-23-27-000-2001-0479-01  
Acumulados Nos. 2000-0428, 2001-0122, 2001-0343  
Actor: GUSTAVO MOYA ÁNGEL Y OTROS  
Acción Popular

|                                                                                                                                                                                                  |                                                 |                                 |               |                                 |
|--------------------------------------------------------------------------------------------------------------------------------------------------------------------------------------------------|-------------------------------------------------|---------------------------------|---------------|---------------------------------|
| Construcción PTAR<br>Canoas hasta nivel<br>TPQA y capacidad<br>que determine<br>MAVDT en licencia<br>(transferencias<br>CAR, tasas<br>retributivas)<br><br>(plazo:2009)                          | Capital<br><br>E.A.A.B.<br><br>DAMA             | NO SE HA<br>CUMPLIDO            |               | sentencia objeto<br>de análisis |
| Operación y<br>mantenimiento PTAR<br>Canoas 4 años<br>(2017-20) (ley 715<br>Propósito General<br>del DC,<br>transferencias<br>sector eléctrico<br>CAR y municipios,<br>tarifas)<br>(plazo: 2009) | E.A.A.B.                                        | NO SE HA<br>CUMPLIDO            |               |                                 |
| Construcción<br>interceptor<br>Salitre - Tunjuelo                                                                                                                                                | Distrito<br>Capital<br><br>E.A.A.B.<br><br>DAMA | ELIMINADO<br>POR<br>INNECESARIO |               |                                 |
| Interceptor<br>Engativá - Cortijo<br>ENCOR<br><br>(plazo: 2009)                                                                                                                                  | Distrito<br>Capital<br><br>E.A.A.B.<br><br>DAMA | CONSTRUIDO                      | \$ US<br>8.6  |                                 |
| Construcción<br>interceptor Fucha<br>- Tunjuelo (18 m)<br><br>(plazo: 2009)                                                                                                                      | Distrito<br>Capital<br><br>E.A.A.B.<br><br>DAMA | CONSTRUIDO                      | \$ US<br>83.3 |                                 |
| Construcción<br>estación elevadora<br>Tunjuelo EET                                                                                                                                               | Distrito<br>Capital                             | ELIMINADO<br>POR<br>INNECESARIO |               |                                 |

Expediente No. 25000-23-27-000-2001-0479-01  
Acumulados Nos. 2000-0428, 2001-0122, 2001-0343  
Actor: GUSTAVO MOYA ÁNGEL Y OTROS  
Acción Popular

|                                                                                                                                                                     |                                              |                   |  |                                                                                                                                   |
|---------------------------------------------------------------------------------------------------------------------------------------------------------------------|----------------------------------------------|-------------------|--|-----------------------------------------------------------------------------------------------------------------------------------|
|                                                                                                                                                                     | E.A.A.B.                                     |                   |  |                                                                                                                                   |
|                                                                                                                                                                     | DAMA                                         |                   |  |                                                                                                                                   |
| Construcción interceptor Tunjuelo - Canoas prof. 5,70m. (transf. DC >30% de 41% Propósito General (plazo: 2009)                                                     | Distrito Capital<br><br>E.A.A.B.<br><br>DAMA | EN PROCESO        |  | Se están terminando obras - acabados - pozos de inspección<br><br>Falta la construcción pozo ITC-12 extracción de las tuneladoras |
| Construcción interceptor Canoas -Alicachín (transferencia CAR, transferencia DC >50% de 41% Propósito General, tasas retributivas) (plazo: 2009)                    | Distrito Capital<br><br>E.A.A.B.<br><br>DAMA | EN PROCESO        |  | Túnel de emergencia<br><br>Se estaba terminando la estructura de descarga                                                         |
| Construcción estación elevadora Canoas (transferencias CAR, tasas retributivas) (plazo: 2009)                                                                       | Distrito Capital<br><br>E.A.A.B.<br><br>DAMA | NO SE HA CUMPLIDO |  | Pendiente de definición en la sentencia objeto de análisis                                                                        |
| Operación y mantenimiento estación elevadora Canoas (EEAR-C) (20 años) (tarifas EAAB-Energía)                                                                       | E.A.A.B.                                     | NO SE HA CUMPLIDO |  | Pendiente de definición en la sentencia objeto de análisis                                                                        |
| Dragado y disposición de lodos, operación y mantenimiento de sistemas de aireación, cosecha y disposición de buchón en E. Muña 17 años (2003-20) (plazo: 2007-2009) | E.A.A.B.<br><br>EMGESA                       | EN EJECUCIÓN      |  |                                                                                                                                   |

Expediente No. 25000-23-27-000-2001-0479-01  
Acumulados Nos. 2000-0428, 2001-0122, 2001-0343  
Actor: GUSTAVO MOYA ÁNGEL Y OTROS  
Acción Popular

|                                                                                                                                                                  |                                                   |                   |  |                                                                |
|------------------------------------------------------------------------------------------------------------------------------------------------------------------|---------------------------------------------------|-------------------|--|----------------------------------------------------------------|
| Dragado R. Bogotá y sus afluentes y jarillón margen izquierda (plazo:2009)                                                                                       | E.A.A.B.<br><br>CAR<br><br>MAVDT<br><br>Min Minas | EN EJECUCIÓN      |  | Se expidió el programa de adecuación hidráulica del río Bogotá |
| Control de vertimientos y producción más limpia PML en sectores de producción                                                                                    | CAR<br><br>DAMA                                   | NO SE HA CUMPLIDO |  |                                                                |
| Delimitar zonas exclusivas de la minería (3 meses)                                                                                                               | MAVDT                                             | EN PROCESO        |  |                                                                |
| Revocar y suspender los títulos, permisos, concesiones y licencias de exploración minera en las zonas de exclusión (6 meses)                                     | MAVDT<br><br>Min Minas                            | EN PROCESO        |  |                                                                |
| Revocar las licencias ambientales, permisos, autorizaciones o concesiones uso y aprovechamiento RN cuando no cumplan exigencias de acto administrativo (6 meses) | MAVDT<br><br>CAR<br><br>DAMA<br><br>Municipios    | EN PROCESO        |  |                                                                |
| Iniciar diligencias tendientes a exigir restauración morfológica y ambiental de áreas intervenidas (6 meses). Reubicar familias explotantes arenas Tunjuelo.     | MAVDT<br><br>CAR<br><br>DAMA<br><br>Municipios    | EN PROCESO        |  |                                                                |
| Promover políticas restrictiva sobre riego de cultivos                                                                                                           | Min Agricultura<br><br>Min Protección             | NO SE HA CUMPLIDO |  |                                                                |

Expediente No. 25000-23-27-000-2001-0479-01  
Acumulados Nos. 2000-0428, 2001-0122, 2001-0343  
Actor: GUSTAVO MOYA ÁNGEL Y OTROS  
Acción Popular

|                                                                                                       |                                                                                                   |                   |  |  |
|-------------------------------------------------------------------------------------------------------|---------------------------------------------------------------------------------------------------|-------------------|--|--|
| y brebaje de ganado con aguas de R. Bogotá                                                            | Social                                                                                            |                   |  |  |
| Controlar y retener productos agrícolas, ganado y productos pecuarios irrigados con aguas R. Bogotá   | Distrito Capital<br><br>Municipios                                                                | NO SE HA CUMPLIDO |  |  |
| Creación de una sola red hidrometeorológica y de monitoreo de aguas en la cuenca del R. Bogotá        | IDEAM<br><br>CAR<br><br>DAMA                                                                      | NO SE HA CUMPLIDO |  |  |
| Control de vertimientos de aguas domésticas                                                           | Distrito Capital<br><br>E.A.A.B.<br><br>CAR<br><br>Municipios<br><br>Departamento De Cundinamarca | NO SE HA CUMPLIDO |  |  |
| Proyecto de Ley para prohibir fabricación y uso de detergentes fosfatados                             | INVIMA<br><br>MAVDT                                                                               | NO SE HA CUMPLIDO |  |  |
| Inclusión de PRAES en educación primaria, secundaria, tecnológica y superior como cátedra obligatoria | Min Educación                                                                                     | EN PROCESO        |  |  |
| Servicio Militar Obligatorio Ambiental y Cuerpo de Policía Nacional Ambiental                         | Min Defensa<br><br>MAVDT<br><br>Policía Nacional                                                  | EN PROCESO        |  |  |
| Cofinanciación obras de                                                                               | Gobernación De Cundinamarca                                                                       |                   |  |  |

Expediente No. 25000-23-27-000-2001-0479-01  
Acumulados Nos. 2000-0428, 2001-0122, 2001-0343  
Actor: GUSTAVO MOYA ÁNGEL Y OTROS  
Acción Popular

|                                                                                                                                     |                                                                                                                                |                         |  |  |
|-------------------------------------------------------------------------------------------------------------------------------------|--------------------------------------------------------------------------------------------------------------------------------|-------------------------|--|--|
| producción más<br>limpia PML de<br>curtiembres de<br>Villapinzón y<br>desalojo familias<br>de ronda (1 año)                         | CAR<br><br>Municipios<br><br>MAVDT<br><br>Min Comercio                                                                         | CUMPLIMIENTO<br>PARCIAL |  |  |
| Implementar,<br>coordinar y poner<br>en funcionamiento<br>Parque de<br>Coeficiente<br>Industrial de<br>curtiembres de San<br>Benito | Distrito<br>Capital<br><br>DAMA<br><br>CAR<br><br>Particulares                                                                 | NO SE HA<br>CUMPLIDO    |  |  |
| Velar por<br>recuperación y<br>protección zonas<br>de ronda R. Bogotá<br>y afluentes                                                | E.A.A.B.<br><br>Municipios                                                                                                     | EN PROCESO              |  |  |
| Expedición de<br>reglamentos de uso<br>del suelo (6<br>meses)                                                                       | Distrito<br>Capital<br><br>Municipio                                                                                           | EN PROCESO              |  |  |
| Ejercer el control<br>de los recursos<br>con destino al<br>saneamiento<br>ambiental previsto<br>en Ley                              | CGR<br><br>Contraloría<br>Departamental<br><br>Contraloría<br>Distrital                                                        | EN PROCESO              |  |  |
| Ingresar a<br>procesos de PML<br>que promuevan CAR<br>y DAMA                                                                        | Gremios De<br>Producción                                                                                                       | CUMPLIMIENTO<br>PARCIAL |  |  |
| Planear y ejecutar<br>programas<br>relacionados con<br>funciones<br>adscritas en art.5<br>de Ley 99/93                              | Min Protección<br><br>Min Minas<br><br>Min Comercio<br><br>Min Agricultura<br><br>Min Educación<br><br>MAVDT<br><br>DNP<br>CAR | EN PROCESO              |  |  |
| Conformar grupo de<br>guardabosques                                                                                                 | CAR                                                                                                                            |                         |  |  |

Expediente No. 25000-23-27-000-2001-0479-01  
Acumulados Nos. 2000-0428, 2001-0122, 2001-0343  
Actor: GUSTAVO MOYA ÁNGEL Y OTROS  
Acción Popular

|                                                                                          |                                                             |                   |  |  |
|------------------------------------------------------------------------------------------|-------------------------------------------------------------|-------------------|--|--|
|                                                                                          | DAMA                                                        |                   |  |  |
| Optimización de mataderos y plantas de faenado                                           | Municipios                                                  | EN PROCESO        |  |  |
| Adecuada destinación de recursos para adquisición predios de protección fuentes hídricas | CAR<br><br>DAMA<br><br>Municipios                           | EN PROCESO        |  |  |
| Cumplir transferencias por regalías y Ley 715 a municipios y Distrito Capital DC         | FNR<br><br>Min Hacienda                                     | EN PROCESO        |  |  |
| Investigaciones sobre innovación tecnológica para saneamiento R. Bogotá y E. Muña        | Mesa Regional Cuenca Río Bogotá                             | NO SE HA CUMPLIDO |  |  |
| Aprobación "pactos de cumplimiento" de empresas privadas                                 | Empresas Involucradas                                       | EN EJECUCIÓN      |  |  |
| Revisar y readecuar funciones CAR y MAVDT para R. Bogotá                                 | Presidencia De La República<br><br>Congreso De La República | NO SE HA CUMPLIDO |  |  |

4.2. Plantas de tratamiento - PTAR Salitre y PTAR Canoas

Sistema de tratamiento de aguas residuales:

- Como se precisó en numerales anteriores, la planta de Aguas Residuales el Salitre es la instalación de saneamiento a través de la cual se tratan las aguas servidas de la zona norte de Bogotá, que se conducen por el alcantarillado, colectores e interceptores que confluyen en la cuenca del Salitre, lo anterior mediante un sistema primario químicamente asistido - TPQA, para un caudal de 4 m³/s.

**Expediente No. 25000-23-27-000-2001-0479-01**  
**Acumulados Nos. 2000-0428, 2001-0122, 2001-0343**  
**Actor: GUSTAVO MOYA ÁNGEL Y OTROS**  
**Acción Popular**

Con la optimización y ampliación de la Ptar se lograría el tratamiento de las aguas residuales del río Salitre y de las cuencas Torca y Jaboque, produciendo un efluente que cumpla con los estándares de calidad.

La Corporación Autónoma Regional de Cundinamarca dentro de la estrategia de saneamiento integral de la cuenca hidrográfica, estructuró el proyecto de Adecuación Hidráulica y Recuperación Ambiental del Río Bogotá, dando cumplimiento a las competencias asignadas por la Ley 99 de 1993.

Dentro de los componentes del proyecto está el relacionado con la ampliación y optimización de la Ptar Salitre, que se encuentra, por demás, como una de las estrategias y hace parte del plan de acción del documento Conpes 3320.

En este contexto, en el año de 2007, la CAR, el Distrito Capital a través de la Secretaría de Ambiente y la E.A.A.B., con el acompañamiento del Gobierno Nacional, suscribieron el Convenio 171, en el cual se asumió la responsabilidad de la inversión de la ampliación y optimización de la Ptar Salitre de  $4\text{m}^3/\text{s}$ , tratamiento primario, a  $8\text{m}^3/\text{s}$ , tratamiento secundario.

Para el apalancamiento de las inversiones se buscó la consecución de los recursos en la Banca Multilateral, en ese sentido se logró el crédito por parte de la CAR con el Banco Mundial, por 250 millones de dólares.

Teniendo en cuenta lo anterior, se inició la segunda fase de ampliación y optimización de la Ptar Salitre, hoy día la misma cuenta con un diseño referencial y se abrió la licitación pública internacional 01/2013 que se encuentra en etapa de preclasificación de oferentes para el componente de diseño de detalle.

Expediente No. 25000-23-27-000-2001-0479-01  
Acumulados Nos. 2000-0428, 2001-0122, 2001-0343  
Actor: GUSTAVO MOYA ÁNGEL Y OTROS  
Acción Popular

Se tiene previsto que una vez optimizada y ampliada la Ptar, se trate un caudal promedio de diseño de 7,1 m<sup>3</sup>/s y un caudal pico horario con clima seco de 14 m<sup>3</sup>/s, así como un caudal máximo en temporada de lluvias de 26 m<sup>3</sup>/s.

- La segunda planta de tratamiento de aguas residuales, no se ha construido, la E.A.A.B.

#### **4.3. ADQUISICIÓN DE PREDIOS**

En lo atinente a los predios necesarios tanto para la ampliación y optimización de la Ptar Salitre como la construcción de la Ptar Canoas y estación elevadora, la Sala encuentra lo siguiente:

##### **4.3.1. PTAR SALITRE: AMPLIACIÓN Y OPTIMIZACIÓN**

Según lo expuesto por la CAR en el documento Preclasificación "Contrato para el Componente 1 del Proyecto: "Diseño Detallado, Construcción de las Obras, Suministro e Instalación de Equipos, Puesta en Marcha y Operación Asistida de la Optimización y Expansión de la Planta de Tratamiento de Aguas Residuales El Salitre - PRÉSTAMO BIRF 7985 -CO", la PTAR Salitre "tomará lugar en los terrenos adquiridos por el Distrito en el inicio del Proyecto de descontaminación del Río Bogotá, en donde la actual Planta de Tratamiento opera. De acuerdo al Plan de Ordenamiento Territorial, los predios donde se encuentra la actual PTAR y los reservados para su ampliación hacen parte de la Unidad de Planeamiento Zonal No. 72 Bolivia, Localidad No. 10 Engativá, Sector 1 Bolivia. Estos terrenos son considerados por el Distrito como una zona verde en unión con la ronda y zona de manejo y preservación ambiental del río Bogotá. Los predios se encuentran al lado izquierdo del Humedal Juan Amarillo y al oriente del río Bogotá, próximos los barrios de Lisboa y Santa Cecilia, las urbanizaciones el Cortijo y la ciudadela Colsubsidio. El

Expediente No. 25000-23-27-000-2001-0479-01  
Acumulados Nos. 2000-0428, 2001-0122, 2001-0343  
Actor: GUSTAVO MOYA ÁNGEL Y OTROS  
Acción Popular

acceso a la planta se realiza a través de glorieta antes del puente de guadua de la autopista a Medellín".

En este contexto, la Sala se abstendrá de hacer consideraciones adicionales debido al avance y cumplimiento de los objetivos en relación con la ampliación de la Ptar Salitre.

#### **4.3.2. PTAR CANOAS - ESTACIÓN ELEVADORA**

En lo atiente a la real situación del predio para la construcción de la planta de tratamiento y la estación elevadora en el sitio denominado Canoas y con ocasión de los requerimientos realizados por el Despacho Sustanciador para el esclarecimiento de dicha situación, la Sala se remite a las consideraciones que se harán en el numeral 6.4. Interceptores - pozo de inspección ITC 12.

No obstante, la Sala recuerda que en lo atinente a la adquisición y propiedad del predio, la propia E.A.A.B. afirmó que el predio no se ha comprado.

En este sentido, la Sala no entiende como después de 8 años y a pesar de que el Municipio de Soacha declaró la utilidad pública del predio, el mismo no se haya adquirido. Por lo anterior, la Sala ordenará que en el término de seis (6) meses a partir de la notificación de la presente providencia, la E.A.A.B. realice todas las gestiones administrativas y presupuestales correspondientes para la adquisición del predio con el fin de construir la planta de tratamiento de aguas residuales de Canoas y la estación elevadora.

#### **4.4. PLANTAS DE TRATAMIENTO DE AGUAS RESIDUALES MUNICIPALES**

A raíz de los crecientes niveles de degradación de la calidad del recurso hídrico en el país, generados por vertimientos municipales sin tratamiento previo, el Gobierno Nacional con

Expediente No. 25000-23-27-000-2001-0479-01  
Acumulados Nos. 2000-0428, 2001-0122, 2001-0343  
Actor: GUSTAVO MOYA ÁNGEL Y OTROS  
Acción Popular

base en estudios detallados de diagnóstico de la problemática y las principales corrientes hídricas afectadas, formuló el Plan Nacional de Manejo de Aguas Residuales Municipales. Lo anterior se hizo en desarrollo del CONPES 3177 de 2002 "*Directrices y Lineamientos para la Formulación de un Plan Nacional de Manejo de Aguas Residuales*" - PMAR.

Este plan priorizó los municipios del país, de acuerdo al impacto ambiental generado por los vertimientos sobre las fuentes hídricas receptoras, y generó estrategias de corto, mediano y largo plazo para resolver esta problemática.

De los municipios que conforman la cuenca del río Bogotá, sólo veintidós (22) cuentan con diversos grados de tratamiento de sus aguas residuales municipales<sup>162</sup>. En la actualidad las PTAR tratan un porcentaje del caudal de aguas residuales generado en el área municipal.

La CAR cuenta con 24 Plantas de Tratamiento de aguas residuales y tres estaciones de bombeo externas. El proceso de operación y mantenimiento que se adelanta con las PTAR bajo la administración de la CAR, se encuentra delegada a través del contrato de operación y mantenimiento con la firma CONHIDRA S.A. - E.S.P., No. 902 de 2009, como Operador Gestor, a quien se le delegó el desarrollo del proceso de Gestión Integral PTAR's, para transferir a los municipios estas plantas de tratamiento.

En atención a esta situación la Contraloría General de la República en el Informe de Auditoría CAR Vigencia 2011 (presentado en julio de 2012) determinó como uno de los hallazgos, la falta de competencia de la Corporación para realizar la operación directa de las Plantas de Tratamiento de Aguas Residuales - PTAR sin tener facultad legal para

---

<sup>162</sup> Según información contenida en el documento denominado "Adecuación hidráulica y recuperación ambiental del río Bogotá - Evaluación ambiental y Plan de Gestión Ambiental - Versión Final" Volumen I de la CAR.

Expediente No. 25000-23-27-000-2001-0479-01  
Acumulados Nos. 2000-0428, 2001-0122, 2001-0343  
Actor: GUSTAVO MOYA ÁNGEL Y OTROS  
Acción Popular

ello, actividad a la cual ha destinado importantes recursos de su presupuesto para el pago de vigilancia y seguridad, energía eléctrica, mantenimiento y acueducto.

Como fundamento de su posición citó lo expuesto por la sala de consulta del servicio civil de esta Corporación<sup>163</sup> que señaló:

*" ...(..) que la ley no le asignó a las Corporaciones Autónomas la Función de prestar servicios públicos domiciliarios, lo cual, además resultaría incompatible y excluyente respecto de la naturaleza misma de tales entidades"*

En este mismo pronunciamiento, se advirtió que dentro de las funciones de las CAR expresadas en el artículo 31 de la ley 99 de 1993 y en particular las señaladas en el numeral 20 y párrafo, de manera alguna suponen la facultad de prestar servicios públicos domiciliarios, actividad que únicamente está reservada a los sujetos jurídicos taxativamente señalados en el artículo 15 de la ley 142 de 1994.

Justamente, la Superintendencia de Servicios Públicos Domiciliarios mediante Resolución SSSPD-207 4400011165 de 2007, sancionó a la CAR por estar operando las PTAR ubicadas en municipios de su jurisdicción, en atención a que esta es una actividad complementaria del servicio público domiciliario de alcantarillado; razón por la cual la CAR procedió a la suscripción del contrato de Obra No. 902 de 2009, con la firma CONHIDRA S.A. - E.S.P., para la operación, mantenimiento y gestión integral de las PTARs, además de delegarle la responsabilidad para transferir a los municipios estas plantas de tratamiento, tal y como se evidencia en la CLÁUSULA SEGUNDA, que consagra lo siguiente:

*"OBLIGACIONES DEL CONTRATISTA: 1. "Cumplir con el objeto descrito en la Cláusula primera del contrato*

---

<sup>163</sup>Radicado 1382 del 22 de noviembre de 2001) en respuesta a la consulta elevada por el Ministro de Ambiente.

Expediente No. 25000-23-27-000-2001-0479-01  
Acumulados Nos. 2000-0428, 2001-0122, 2001-0343  
Actor: GUSTAVO MOYA ÁNGEL Y OTROS  
Acción Popular

*dentro del término y las condiciones acordadas, incorporando en el desarrollo de dicha labor, sus conocimientos y experiencias",*

*(...)*

*numeral 11.7 GESTIÓN INTEGRAL PARA LA SOSTENIBILIDAD DE LA INFRAESTRUCTURA A CARGO DE LA CAR: "Dentro de las obligaciones que deberá cumplir el Contratista-operador se encuentra **las gestiones tendientes a que las administraciones municipales y/o las entidades prestadoras de los servicios de alcantarillado en la zona de jurisdicción de estas PTAR, vayan asumiendo de manera progresiva la prestación de la actividad complementaria de tratamiento de aguas residuales dentro del servicio de alcantarillado.** Por ende, las gestiones y los resultados de estas actividades deben mostrar avances y logros concretos en este propósito, debiendo contar con las evidencias como aprobaciones, autorizaciones, convenios, planes de acción y demás mecanismos de orden jurídico - institucional que correspondan con la participación de entidades competentes como: la Superintendencia de Servicios Públicos Domiciliarios, la Comisión Reguladora del Agua Potable y el Saneamiento Básico, los Municipios y/o las Empresas de Servicios Públicos a cargo del servicio de acueducto y alcantarillado".*

Lo anterior refleja que la CAR por sí misma y a través de CONHYDRA S.A ESP, ha venido adelantando una gestión dirigida a lograr la transferencia de las Plantas de Tratamiento de Aguas Residuales que están a su cargo actualmente.

De otra parte, la Contraloría como resultado de su ejercicio auditor advirtió que la operación y mantenimiento de las PTAR a cargo de la CAR carece de controles efectivos sobre instalaciones, equipos, estado, efluente y valoración cualitativa de los mismos, destino de los vertimientos que no alcanzan a ser tratados, impacto paisajístico de la obra, olores y se evidencian asentamientos urbanos cercanos.

#### **IV.4. INTERCEPTORES**

Como proyectos sanitarios para el saneamiento de la cuenca hidrográfica, siguiendo lo dispuesto en el documento Conpes 3320, en el Plan de Ordenamiento Territorial Decreto 619 de

Expediente No. 25000-23-27-000-2001-0479-01  
Acumulados Nos. 2000-0428, 2001-0122, 2001-0343  
Actor: GUSTAVO MOYA ÁNGEL Y OTROS  
Acción Popular

2000 modificado por el Decreto 469 de 2003, se tienen los siguientes:

#### **iv.4.1. INTERCEPTOR ENGATIVÁ - CORTIJO - ENCOR CONSTRUIDO**

Según la CAR el interceptor "se proyectó con el fin de eliminar las descargas de aguas sanitarias al río provenientes de la estación de bombeo de Villa Gladys, el emisario final de Engativá y del Interceptor Gran Granada y conducir las aguas residuales al canal de aducción que alimenta la Planta de Tratamiento, Drena un área total de 687,81ha, la obra entró en funcionamiento en el segundo semestre de 2009".

En este contexto, la Sala se abstendrá de hacer consideraciones adicionales debido al avance y cumplimiento de los objetivos en relación con la construcción y operación del interceptor -ENCOR.

#### **IV.4.2. INTERCEPTOR FUCHA - TUNJUELO CONSTRUIDO**

Siguiendo lo manifestado por la CAR el "IFT tiene por objeto conducir las aguas del interceptor izquierdo del Fucha y las aguas residuales de la cuenca del Tintal hacia el interceptor Tunjuelo Canoas. Está comprendido entre el río Fucha y el río Tunjuelo, se desarrolla en sentido suroccidental, iniciando en el pondaje de amortiguamiento. El IFT recibe las aguas transportadas por el interceptor Fucha, estructura que recolecta las aguas residuales y las conexiones erradas del sistema de lluvias al sistema de residuales de los interceptores que recoge (izquierdo canal Fucha, Boyacá, Sur, Kennedy, Fucha Bajo, Alsacia y Fontibón), estructuras ya construidas y que vertían directamente al río Fucha".

En este contexto, la Sala se abstendrá de hacer consideraciones adicionales debido al avance y cumplimiento de los objetivos en relación con la construcción del interceptor Fucha - Tunjuelo.

Expediente No. 25000-23-27-000-2001-0479-01  
Acumulados Nos. 2000-0428, 2001-0122, 2001-0343  
Actor: GUSTAVO MOYA ÁNGEL Y OTROS  
Acción Popular

#### **IV.4.3. INTERCEPTOR TUNJUELO - CANOAS CONSTRUIDO**

El ITC - Túnel de emergencia se encuentra construido, su función es transportar las aguas residuales de las cuencas del Fucha, Tunjuelo, Tintal y Soacha hasta el lugar donde se entregarán para que sean tratadas. El túnel empieza inmediatamente después del pozo de empalme de los túneles de los interceptores Fucha - Tunjuelo, IFT, Tunjuelo Bajo, ITB.

En este contexto, la Sala se abstendrá de hacer consideraciones adicionales debido al avance y cumplimiento de los objetivos en relación con la construcción del interceptor Tunjuelo - Canoas, túnel de emergencia. Sin perjuicio de lo anterior y en lo atinente a los pozos de inspección y mantenimiento 9, 11 y 12, la Sala hará las siguientes precisiones:

##### **iv.4.3.1. POZOS DE MANTENIMIENTO E INSPECCIÓN 9 Y 11 SIN CONSTRUIR**

Siguiendo las consideraciones expuesta por el Despacho Sustanciador en el auto de 29 de octubre de 2012, y toda vez que a la fecha no se conoce el estado real de los mismos a pesar de haberse ordenado que sin necesidad de requerimiento debían informar las actuaciones adelantadas, la Sala hará las siguientes consideraciones en lo que tiene que ver con la construcción de los **POZOS DE MANTENIMIENTO E INSPECCIÓN 9 Y 11**:

Sobre el particular, el Gerente de la Empresa de Acueducto y Alcantarillado de Bogotá en la diligencia realizada el día 17 de octubre del año en curso, contestó lo siguiente a la pregunta de informar si los pozos ITC 9 Y 11 ya fueron contruidos:

Expediente No. 25000-23-27-000-2001-0479-01  
Acumulados Nos. 2000-0428, 2001-0122, 2001-0343  
Actor: GUSTAVO MOYA ÁNGEL Y OTROS  
Acción Popular

"El pozo nueve no se construyó por la razón de no entrega del predio y no resulta conveniente construir un pozo después de construir el túnel porque lo iba a impactar de manera negativa, se ha identificado que no resulta necesario, es más, hubiera sido mejor tomarla como la supresión de una obra que su ejecución si bien está prevista en el diseño original no resultaba necesaria para la ejecución definitiva. **El pozo 11, se encuentra en la misma circunstancia** y además se encuentra ubicado en la finca Canoas, que todavía está en extinción predial" (fl. 11250 vuelto - Cdno. 16. Negrillas fuera de texto).

Por su parte, el ingeniero José Antonio Félix, director y representante legal de la Interventoría Canoas, al cuestionamiento de precisar el estado actual de la obras contratadas dijo que "en este momento se encuentra dentro del proyecto completo el interceptor Tunjuelo Canoas, los componentes de los pozos, pozo 1 al pozo 10, **exceptuando el 9 y el 11 (...)** El pozo 9 y 10 **están suspendidos**, el 9 por problemas de una entrega tardía del predio, lo cual no permitió el avanzar en la construcción de éste, debida a la próxima terminación que se tenía del contrato, de lo cual se hicieron los diseños, el diseño definitivo de acuerdo al origen del contrato, posteriormente debido a la entrega tardía del predio, el túnel ya había pasado por esa zona y obligó hacer un prediseño diferente para adaptarlo a las nuevas condiciones; debido a que no existía el tiempo suficiente para la terminación de ese pozo, se tuvo que suspender y no se avanzó más en él. El pozo 11, está suspendido también por la falta de entrega del predio que **hasta esta fecha no se tiene todavía**" (fl. 11244- Cdno. 16. Negrillas fuera de texto).

Asimismo, más adelante en la diligencia de testimonio anotó que el ITC - 9 no ha sido construido, "esta zona particular del pozo nueve, se entregó el predio tarde, quiere decir que al momento de entregar el predio el túnel estaba por cruzar

Expediente No. 25000-23-27-000-2001-0479-01  
Acumulados Nos. 2000-0428, 2001-0122, 2001-0343  
Actor: GUSTAVO MOYA ÁNGEL Y OTROS  
Acción Popular

la zona donde se ubica este pozo, razón por la cual obliga a modificar el proceso constructivo y éste lleva un análisis de un dimensionamiento y por lo tanto ésta modificación en el procedimiento constructivo obligaba a mayor tiempo al que en ese momento estaba estipulado, quiere decir que la etapa constructiva iba a rebajar el tiempo que estaba contratado que era el 5 de agosto de 2012" (fl. 11246 - Cdno. 16. Negrillas fuera de texto).

Finalmente, el contratista - Consorcio Canoas - indicó que el pozo ITC - 9 "no ha sido construido por cuanto la EAAB entregó el predio tardíamente, es decir, por fuera del término programáticamente viable para su construcción". Aclaró que "la EAAB solicitó al Consorcio presentar una actualización del diseño, atendiendo las nuevas condiciones; para el efecto, el Consorcio Canoas procedió a entregar una nueva alternativa ajustada a tales condiciones de obra, sin embargo, debido a su complejidad geotécnica y constructiva, la solución propuesta no permitía construirlo antes de la terminación del contrato. A pesar de dicha situación, y de la insistencia del contratista, el Acueducto no adoptó una solución (como por ejemplo el acordar un cambio de condiciones) ni tampoco definió un nuevo plazo" (fl. 5 - Cdno. 17. Tomo I Contestación Comunicado Consorcio Oderbrecht - Cass. Negrillas fuera de texto).

De lo precisado con antelación, la Sala concluye, sin dubitación alguna, que no obstante dentro del contrato 1-01-25500-1115-2009 se encuentra la obligación de construir los pozos de inspección y mantenimiento ITC 9 Y 11, los mismos no han sido ejecutados por problemas prediales.

Efectivamente, se desprende de la intervención del Consorcio, de la interventoría y de la propia E.A.A.B. E.S.P., que ésta última entregó tardíamente el predio necesario para la construcción del pozo ITC - 9 y no entregó el inmueble requerido para el pozo ITC - 11.

Expediente No. 25000-23-27-000-2001-0479-01  
Acumulados Nos. 2000-0428, 2001-0122, 2001-0343  
Actor: GUSTAVO MOYA ÁNGEL Y OTROS  
Acción Popular

En la actualidad el túnel del interceptor ya cruzó las zonas donde se habían ubicado estos pozos - ingeniería básica y de detalle-, razón por la cual a la fecha se requiere la modificación de los diseños y del proceso constructivo.

Si bien el Gerente de la Empresa de Acueducto y Alcantarillado argumentó que no resulta conveniente construir un pozo después de ejecutar el túnel por cuanto el mismo sería impactado de manera negativa (fl. 11250 vuelto - Cdno. 16), también lo es que se requiere un estudio completo de las nuevas circunstancias en aras de adoptar de manera sustentada la decisión que mejor convenga (contractual - técnica - económica) a los intereses de la colectividad.

Lo anterior guardada la proporción con la finalidad de la obra misma, pues no puede desconocerse de ninguna manera que los pozos fueron contemplados en los diseños y, por ende, en el proceso contractual, por lo que en principio se podría apreciar que la decisión de incluirlos no sería otra que razones de naturaleza técnica y de futura atención (inspección y mantenimiento), otorgándole al sistema de alcantarillado troncal ITC - Túnel de Emergencia la seguridad y estabilidad requerida para su óptima operación.

Así pues, en lo relacionado con los pozos ITC 9 Y 11, y toda vez que no se conoce la real situación de los mismos a pesar de haberse ordenado establecer la necesidad de contar con esas estructuras y, en caso de ser necesarias, determinar las condiciones técnicas de construcción, a través del auto de 29 de octubre de 2012, para la Sala resulta pertinente ordenar que en caso de no haberse definido tal situación en el término de diez (10) días calendario lo haga, dada las implicaciones económicas respecto de los recursos públicos y la obligación de propender por su garantía y protección.

Expediente No. 25000-23-27-000-2001-0479-01  
Acumulados Nos. 2000-0428, 2001-0122, 2001-0343  
Actor: GUSTAVO MOYA ÁNGEL Y OTROS  
Acción Popular

#### IV.4.3.2. ITC 12 - SIN CONSTRUIR

En lo atinente a la construcción del POZO ITC - 12 y siguiendo las anteriores consideraciones en cuanto a la fecha, el mismo no ha sido construido y no se conoce el estado de la orden impartida por el Despacho Sustanciador en el auto de 29 de octubre en comento, la Sala estima necesario recordar lo siguiente:

Una vez revisado el contrato 1-01-25500-1115-2009 *"Diseño, construcción y puesta en operación de un túnel bajo la modalidad llave en mano"*, se encuentra que inicialmente el pozo ITC 12 fue previsto como un pozo de inspección y mantenimiento, salvaguardando la potestad de la Empresa de Acueducto de ordenar, durante la ejecución del contrato, la construcción de los pozos de cribado y bombeo para la estación EBARC (44m y 55m de diámetro respectivamente).

En cuanto al diámetro, en la ingeniería básica del contrato dispuesta dentro de las condiciones técnicas ICSM-731-2009, diseño hidráulico y geométrico numeral 4.4.1. se definió que el mismo sería de 13 metros para los pozos de inspección, *"esta dimensión permite extraer la máquina tuneladora en caso de ser necesario durante el proceso de construcción"*. (fl. 663 - Tomo II Contestación Comunicado Consorcio Oderbrecht - Cass), igualmente y en lo atinente a la profundidad, se estableció que el pozo iniciaba en la cota 2,547.39 y terminaba en la 2,547.68, esto es, con una altura de 32.71 metros (fl. 427 - Tomo I Contestación Comunicado Consorcio Oderbrecht - Cass).

Sobre este punto y ante las dudas presentadas por la empresa Emgesa S.A., se requirió a las partes involucradas para que informaran *¿cuál es la cota prevista en los diseños originales y en los documentos contractuales del interceptor Tunjuelo - Canoas al inicio de la planta y de ésta a la estación elevadora?*, además para que señalaran claramente si

Expediente No. 25000-23-27-000-2001-0479-01  
Acumulados Nos. 2000-0428, 2001-0122, 2001-0343  
Actor: GUSTAVO MOYA ÁNGEL Y OTROS  
Acción Popular

las cotas de llegada del interceptor al predio donde está prevista la construcción de la planta de tratamiento y la estación elevadora se habían conservado respecto de los diseños originales. Al respecto contestaron:

*"De acuerdo con el predimensionamiento de la PTAR Canoas, se tiene contemplado que la cota al inicio de la Planta debe ser de 2550 msnm y de acuerdo a lo definido en la ingeniería básica de la estación elevadora la cota debería ser de 2511,14 msnm, es decir que, si se mantiene la ubicación de la planta de tratamiento en el sitio denominado "Canoas", es necesario que la estación elevadora eleve más de 40 m las aguas residuales para disponerlas en la planta para su respectivo tratamiento..."*

*"Es importante anotar que la PTAR Canoas no tiene diseños de ingeniería de detalle, es decir, ni sus dimensiones ni cotas son las definitivas. La única obra que cuenta con diseños de ingeniería detallada es el interceptor Tunjuelo Canoas ITC. No obstante, los suelos aluviales orgánicos existentes en algunos tramos del ITC obligaron a modificar su trazado, cambio que, en especial se dio en el sector de Canoas, donde se reubicó el pozo ITC-12, previsto originalmente en el predio de la Hacienda Canoas (ingeniería básica) y trasladado al predio denominado INVIAS".*

Con ocasión de la respuesta de la E.A.A.B. E.S.P. se realizaron múltiples requerimientos para conocer en concreto las razones del cambio del trazado del ITC - Túnel de Emergencia y la reubicación del pozo ITC - 12. En lo que respecta a éste último se resaltan las siguientes manifestaciones:

El apoderado judicial de la E.A.A.B. E.S.P. a través de memorial fechado el 13 de septiembre del año en curso, sostuvo:

*"La anterior Administración estableció la necesidad de dicha modificación en estudios realizados durante el año 2011 en el marco del contrato llave en mano 1-01-25500-1115-2009, de lo cual tuvieron conocimiento todas las entidades involucradas..."*

Expediente No. 25000-23-27-000-2001-0479-01  
 Acumulados Nos. 2000-0428, 2001-0122, 2001-0343  
 Actor: GUSTAVO MOYA ÁNGEL Y OTROS  
 Acción Popular

*"Como resultado de las investigaciones se concluyó, según consta en el informe ya citado "Análisis comparativo de las opciones de construcción de las estructuras pozo cribado, pozo de succión y túnel de conexión en suelos, con la opción de construir un pozo de mayor diámetro en roca" entregado por la interventoría de septiembre 30 de 2011, que las condiciones en el sitio de Invías eran mucho más favorables y ofrecerían la oportunidad de construir de una manera segura un pozo de 65 metros de diámetro que pudiera servir para el rescate de las máquinas tuneladoras y como pozo de criba y bombeo, sin necesidad de excavar el túnel; además, dada la mayor resistencia de la masa rocosa, el comportamiento estructural del pozo único a largo plazo sería muy favorable, sin asentamientos considerables y con gran resistencia al sismo.*

*"El pozo único también eliminaría el problema de posibles interferencias en la excavación de los dos pozos.*

*"Como conclusión de todo lo anterior y como se puede ver en forma más detallada en los anexos del presente informe, la mejor opción técnica y económica, fue la de la construcción del pozo, ya sea único para bombeo y succión o para el pozo ITC 12, en el predio Invías. Esa fue la razón por la cual en el mes de septiembre de 2011 se solicitó al contratista modificar el alineamiento inicial" (fls. 10900 vuelto, 10903 y 10903 vuelto - Cdno. 15. Negrillas y subrayado fuera de texto).*

El representante legal del Consorcio Canoas en respuesta a los interrogantes formulados por el Despacho mediante auto de 21 de septiembre de 2012, mencionó:

*"...la razón por la cual fue necesaria la reubicación del pozo ITC 12 obedeció a la falta de titularidad del predio denominado "Canoas"(fl. 11114 - Cdno. 16. Negrillas y subrayado fuera de texto).*

Para fundamentar su señalamiento presentó y anexó una relación cronológica de las comunicaciones cruzadas con la Interventoría y la E.A.A.B. E.S.P., donde se vislumbran los problemas prediales que llevaron a la E.A.A.B. a modificar la localización del pozo ITC - 12.

Expediente No. 25000-23-27-000-2001-0479-01  
Acumulados Nos. 2000-0428, 2001-0122, 2001-0343  
Actor: GUSTAVO MOYA ÁNGEL Y OTROS  
Acción Popular

En la diligencia de recepción de testimonios realizada el día 17 de octubre de 2012 (fls. 11231 a 11251, cdno. 16) el ingeniero JORGE BARRAGÁN HOLGUÍN - Director del Consorcio Canoas, conformado por la constructora Norberto Odebrecht y Cass constructores, y el señor JOSÉ ANTONIO FÉLIX, Director de la Interventoría Consorcio Canoas, en relación con la modificación de los trazados y reubicación del pozo ITC -12, manifestaron:

JORGE BARRAGÁN HOLGUÍN  
DIRECTOR DEL CONSORCIO CANOAS

"Como ya les comenté, el contrato que tiene el consorcio, es un contrato llave en mano que incluye el diseño, suministrito, construcción y puesta en operación del túnel, nosotros recibimos para preparar nuestra oferta un diseño básico preparado por la firma HMB (SIC), en el diseño básico se tenía planteado unos puntos estimados, un trazado estimado y unos puntos que deberían servir para el mantenimiento y la inspección del túnel. En el primer estudio que nosotros hicimos del proyecto y en los primeros análisis geotécnicos, encontramos que la localización del pozo ITC 12 que planteaba HMB (SIC), nos daba en un sitio que era inapropiado; hay dos terrazas contra el río, una terraza baja queda a nivel de río, que es prácticamente la zona donde debió fluctuar (SIC) recientemente el río, es una zona inundable, y viene una terraza más alta que es la zona donde debió haber fluctuado muchos miles de años, pero ya es una zona mucho más estable, el pozo infortunadamente, el diseñador lo colocó prácticamente donde estaba el cambio, es decir, el talut (SIC) entre las dos terrazas, lo que implicaba una serie de inconvenientes constructivos y de orden de estabilidad para el pozo que se tenía que construir ahí o se pensaba construir ahí. El contrato nuestro, prevé que nosotros deberíamos garantizar la vida útil del proyecto por 50 años, entonces nosotros en esa posición no podíamos garantizar la vida útil para ese sitio y propusimos con un soporte geotécnico que anexamos más o menos al mes 1 de la obra, la ubicación del pozo ITC 12 en el pozo superior donde se lograba mejor condición de orden geotécnica, esta fue la primera modificación que se le hizo al trazado. 20:28 Posteriormente, nosotros hicimos la investigación geotécnica, hicimos el diseño y entregamos el diseño del pozo 12 en las condiciones que estaban previstas en el contrato para poder construir el pozo y sacar las máquinas ahí, en

Expediente No. 25000-23-27-000-2001-0479-01  
 Acumulados Nos. 2000-0428, 2001-0122, 2001-0343  
 Actor: GUSTAVO MOYA ÁNGEL Y OTROS  
 Acción Popular

nuestro programa, consideramos que ese pozo debería iniciar su construcción a más tardar en junio de 2010, de tal manera que, para cuando llegara la máquina tuneladora que estaba haciendo el túnel en roca, sacara la máquina y ya el pozo estuviera terminado, porque de esa manera llegábamos nosotros por la máquina liberábamos directamente, y automáticamente por el pozo. EL ACUEDUCTO ERA EL RESPONSABLE DE ENTREGARNOS EL PREDIO, HUBO RETRASOS EN LA ENTREGA DEL PREDIO ENTONCES EL ACUEDUCTO NOS PROPUSO QUE CAMBIÁRAMOS LAS CONDICIONES DE CONSTRUCCIÓN DEL POZO PARA QUE PUDIERA HACERSE EL POZO POSTERIORMENTE A QUE LLEGARA LA MÁQUINA; entonces HICIMOS TODO EL ANÁLISIS TÉCNICO Y ECONÓMICO, LA MÁQUINA SI LLEGABA PRIMERO QUE LA CONSTRUCCIÓN DEL POZO, NECESARIAMENTE HABÍA QUE AMPLIAR EL TAMAÑO DEL POZO PORQUE YA SE NECESITABA OTRA TECNOLOGÍA, el pozo inicialmente había sido previsto hacer con un clanchet, es decir, con una cuchara de almeja que iba haciendo la forma del pozo y se iba concretando, después se escavaba por dentro, se hacía la base de fondo y se recibía la máquina; PERO SI YA ESTABA LA MÁQUINA EN EL SITIO, PORQUE YA DESPUÉS DE QUE SE PARA LA MÁQUINA EN SUELO BLANDO QUEDA ATRAPADA, ENTONCES NOS IMPLICABA CORTAR EL TÚNEL YA CONSTRUIDO PARA PODER HACER EL POZO, COMO LA MÁQUINA TENÍA UN TAMAÑO ESPECIFICO, SON BÁSICAMENTE 11 METROS QUE TIENE LA MÁQUINA, MAS UNA ZONA QUE HABÍA QUE SEPARAR PARA CONSTRUIR UNA SEPARACIÓN, PORQUE PARA CORTAR EL TÚNEL QUE YA ESTABA EN CONCRETO, HABÍA QUE UTILIZAR UNA MÁQUINA FRESADORA PARA CORTAR EL CONCRETO, PERO COMO LAS PAREDES DE LOS CORTES VERTICALES SE TIENE QUE REMPLAZAR POR PENTONITA (SIC), EL SUELO SE REMPLAZA POR PENTONITA (SIC) PARA MANTENER ESTABLE LAS PAREDES, ESO IMPLICABA QUE AL CORTAR EL TÚNEL TODA LA PENTONITA (SIC) SE IRÍA POR EL TÚNEL, E INUNDABA LA MÁQUINA. PARA PROTEGER LA MÁQUINA, HABÍA QUE CONSTRUIR DOS DADOS A LOS LADOS EN CONCRETO PARA QUE CUANDO SE CORTARA EL TÚNEL NO SE FUERA TODA LA PENTONITA (SIC) HACIA EL TÚNEL Y HACIA LA MÁQUINA; PERO AHÍ VENÍA OTRO PROBLEMA, COMO ESTÁBAMOS EN UN SUELO ARCILLOSO, LA MÁQUINA CUANDO VA A CORTAR EL CONCRETO EMPIEZA HACERLE FUERZA AL TÚNEL Y VA HUNDIENDO EL TÚNEL A MEDIDA QUE VA ROMPIENDO, ESO COGE Y DESVÍA LA HIDRÁULICA DEL TÚNEL Y AFECTA EL TÚNEL. 24:08 Todas estas previsiones el tamaño para no afectar la tuneladora, implicó, y se hizo la propuesta al acueducto, de un pozo que en ese momento daba de 25 metros de diámetro, con un costo y unos equipos que no se disponían en el país, a raíz el acueducto solicitó que de una vez se hiciera un pozo grande y se cotizara el pozo de cribado, el pozo de 44 metros. Nosotros hicimos la investigación geotécnica: hicimos perforaciones, investigaciones, varias líneas

Expediente No. 25000-23-27-000-2001-0479-01  
Acumulados Nos. 2000-0428, 2001-0122, 2001-0343  
Actor: GUSTAVO MOYA ÁNGEL Y OTROS  
Acción Popular

sísmicas, para hacer todo el estudio geotécnico de la zona, incluso, contratamos una firma italiana que nos hizo la investigación, la firma colombiana que hizo la investigación del suelo se llama Geodata, LA FIRMA ITALIANA QUE HIZO LA MODELACIÓN HIDRÁULICA Y ESTRUCTURAL Y ESTABILIDAD EN EL CUAL ENCONTRAMOS DE QUE EN LA MEDIDA QUE SE VA AGRANDANDO EL POZO, LAS CONDICIONES DE ESTABILIDAD SE VAN PERDIENDO, PORQUE COMO EL SUELO ES TAN FLUIDO EN ESA ZONA, VA PERDIENDO CAPACIDAD DE SOPORTE. Entonces uno de los problemas más críticos fue, nosotros en los estudios que aparecían en el diseño básico, aparecía una zona en roca, más o menos a 70 metros de profundidad, resulta que la roca cuando hacemos los sondeos, no era roca, sino una arena muy apretada, que tenía mucha agua, y la presión de agua era muy grande, que podría generar una supresión del suelo superior, sobre el hueco y podría generar una falla de fondo; empezamos a generar sistemas para poder sostener ese suelo, encontramos tres alternativas pero todas eran muy costosas: una es hacer inyecciones de concreto y de tratar solidificar toda la arena en concreto en una técnica que se llama jet grouting; otra era hacer unas inyecciones con nitrógeno para convertirla en hielo, es decir, congelar el agua que está en la arena para que no se genere esa presión y, otra tecnología que no recuerdo; las tres alternativas eran muy costosas. EL ACUEDUCTO ENTONCES, EMPEZÓ A MIRAR UNA ALTERNATIVA DE UBICACIÓN DEL POZO, DE TAL MANERA QUE PUDIERA HACERSE LOS POZOS GRANDES SIN LOS RIESGOS Y LOS SOBRECOSTOS QUE IBAN IMPLICAR ESOS POZOS; DE AHÍ EL ACUEDUCTO HIZO UNA INVESTIGACIÓN CON EL INVÍAS Y SE LOCALIZÓ ESE PREDIO, PRÁCTICAMENTE AL OTRO LADO DE LA CARRETERA DONDE SE SUPONÍA EN ESE MOMENTO QUE ESTÁBAMOS EN ROCA, en ese sitio ya la máquina estaba por llegar, la máquina se ubicó en ese sitio, y se hizo toda la investigación tecnológica, se hicieron todas las perforaciones, nuevos ensayos, se hicieron nuevos análisis tridimensionales de toda la estructura, en el cual se HICIERON LOS ANÁLISIS PARA UN POZO PEQUEÑO PARA SÓLO SACAR LAS MÁQUINAS, DOS POZOS PARA EL CRIBADO Y PARA EL BOMBEO DE LA PLANTA DE TRATAMIENTO FUTURA Y, UNA ALTERNATIVA QUE NOS PROPUSO LA MISMA CONSULTORA ITALIANA ABORDANDO UNA IDEA QUE SE HIZO EN BUENOS AIRES, EN UN PROYECTO SIMILAR DE CONSTRUIR UN SOLO POZO ÚNICO QUE TUVIERA TODA LAS CONDICIONES PARA REALIZAR LAS TRES OPERACIONES QUE SE ESPERABAN DEL PROYECTO. 28:38 En esas condiciones se hizo el análisis económico y encontrábamos que con el pozo único se encontraba un ahorro del orden de 40 y 45 mil millones de pesos, respecto a la solución de construir los dos pozos grandes de cribado y de bombeo; posteriormente ahí fue cuando se firmó el acta del 9 DE SEPTIEMBRE y se nos pidió a nosotros realizar una cotización del pozo

Expediente No. 25000-23-27-000-2001-0479-01  
 Acumulados Nos. 2000-0428, 2001-0122, 2001-0343  
 Actor: GUSTAVO MOYA ÁNGEL Y OTROS  
 Acción Popular

grande. NOSOTROS PREPARAMOS ESA OFERTA LA ENTREGAMOS EN OCTUBRE PARA QUE TOMARA LA DECISIÓN EL ACUEDUCTO, NOS PIDIERON UNOS DESCUENTOS Y SE LLEGÓ A UN PRECIO QUE SE ACORDÓ CON ELLOS, Y FINALMENTE NO SE OPTÓ POR ESA SOLUCIÓN. NOSOTROS TUVIMOS ENTENDIDO QUE EL ACUEDUCTO CON LA NUEVA ADMINISTRACIÓN TIENE UNA CONCEPCIÓN DIFERENTE DEL PROYECTO, ENTONCES ESA SOLUCIÓN QUEDÓ PENDIENTE Y PLASMADA SÓLO COMO UNA IDEA EN LA MODIFICACIÓN. 29:59 Esa modificación implicó la modificación de la longitud de los túneles para llegar al nuevo pozo, en este momento, NOSOTROS HEMOS VENIDO SOLICITANDO QUE SE NOS DÉ UNA SOLUCIÓN PARA HACER POR LO MENOS UN POZO PEQUEÑO PARA SACAR LAS MÁQUINAS Y EVITAR UN PERJUICIO MAYOR DEL QUE AHORA TENEMOS. 30:35 PREGUNTADO: Precisar con claridad la razón fundamental del cambio de ubicación del pozo, fue por riesgo predial o por las condiciones sobrevinientes geológicas CONTESTÓ: Es un tema complicado de dirimir, yo diría que en comienzo se presentó un problema predial, que dio lugar a una investigación mucho más profunda del terreno, y a raíz de esa investigación mucho más profunda del terreno se encuentra que las condiciones geotécnicas del terreno no daban para que se desarrollara el proyecto como lo quería el acueducto, es decir, fue una confluencia de factores, yo no podría decir cuál es el que más implicó, lo cierto es que si el acueducto posteriormente hubiera sacado una licitación para esos pozos, ese terreno donde estaba previsto, los costos hubieran sido muchísimos más altos, que la solución que finalmente se logró construir en el terreno que ahorita están las máquinas" (fls. 11236 a 11237 vuelto - Cdo. 16 Mayúsculas, negrillas y subrayado fuera de texto).

JOSÉ ANTONIO FÉLIX  
 DIRECTOR DE LA INTERVENTORÍA CONSORCIO CANOAS

"PREGUNTADO: ¿Cuáles son las razones por las cuales se acordó realizar la reubicación del pozo ITC 12, precisando si la falta de titularidad del predio denominado hacienda Canoas, o las condiciones geológicas del suelo, fueron el fundamento del cambio del referido pozo. En el último evento, ¿cuáles son los estudios que la sustentan? CONTESTADO: Para la construcción de este pozo estaba previsto dentro del proceso constructivo, que era necesario la construcción primero del pozo ITC 12, para poder llegar con cualquiera de los túneles, en este caso era el túnel de emergencia era el que estaba programado para llegar primero, para poder retirar la máquina, es decir, era necesario que tuviéramos el pozo 12 terminado para poder sacar los equipos tal como se marcaba el procedimiento constructivo. Al

Expediente No. 25000-23-27-000-2001-0479-01  
Acumulados Nos. 2000-0428, 2001-0122, 2001-0343  
Actor: GUSTAVO MOYA ÁNGEL Y OTROS  
Acción Popular

estar revisando el avance del túnel de emergencia Y VER EL ATRASO QUE SE TENÍA EN LA ENTREGA DEL PREDIO y al hacer la reubicación del pozo ITC 12 dentro del mismo predio Canoas por parte del contratista debido a las condiciones geotécnicas que se presentaban en ese lugar fue necesario verificar o analizar la posibilidad de poder reubicar el pozo porque las condiciones que en ese momento ya prevalecían era que el túnel de emergencia va llegar primero antes de la construcción del pozo, y eso generaría que la posteriormente que llegara el túnel de emergencia hacia la zona del pozo en Canoas de 12 metros de diámetro, ya no estaría construido y por tanto generaría la necesidad de construir un pozo de mayores dimensiones; de tal manera que esto provocaría costo adicional. Entonces, el costo adicional más las condiciones geotécnicas que se presentan en esa zona para construir un pozo de 12 m era factible; mas sin embargo esta nueva condición era necesario duplicar esta dimensión y mirando unas condiciones constructivas muy diferentes, lo cual generaría sobre costos, tiempos adicionales y riesgos en la construcción; razón por la cual se decide adoptar la posibilidad de construir el mismo pozo pero con el servicio y la utilidad para un sistema de cribado. Al ver esa condición, y ver la posibilidad de esa condición de dificultad constructiva que se presentaba se dio la posibilidad y la alternativa de reubicarlo en la zona del predio en razón a las condiciones para tomar la decisión del cambio" (fls. 11247 - Cdno. 16 Mayúsculas y negrillas fuera de texto).

De una lectura detenida de lo expuesto, la Sala encuentra que la anterior Administración de la Empresa de Acueducto y Alcantarillado de Bogotá - E.A.A.B. E.S.P., con el consentimiento del contratista (acta de arreglo directo de 9 de septiembre de 2011), decidió eliminar la construcción del pozo ITC - 12 en el predio denominado "Hacienda Canoas".

Se observa que la modificación de las longitudes de los túneles tanto del ITC como del de emergencia se dio con ocasión de la reubicación del pozo ITC - 12, esto es, al relocalizar el pozo, forzosamente se modificaron las longitudes de los mismos.

Expediente No. 25000-23-27-000-2001-0479-01  
Acumulados Nos. 2000-0428, 2001-0122, 2001-0343  
Actor: GUSTAVO MOYA ÁNGEL Y OTROS  
Acción Popular

De igual manera se tiene que la principal razón del cambio de trazado y reubicación del mencionado pozo al predio denominado "*Invías*", se presentó con ocasión de la falta de titularidad del predio "*Hacienda Canoas*". Al respecto, se allegaron al plenario sendas comunicaciones cruzadas y diferentes actas suscritas entre la E.A.A.B. E.S.P., el Consorcio Canoas y la Interventoría en las cuales se evidenciaron los problemas relacionados con la adquisición de los predios.

De acuerdo con la cláusula 4.2.2.14 de las especificaciones generales, a la E.A.A.B. E.S.P. le corresponde la compra de los predios que requiriera el proyecto. Por su parte, al Contratista - Consorcio Canoas - le atañe la gestión, adquisición, permisos, arrendamiento y servidumbres de los predios identificados como nuevos, debido a las "*modificaciones extemporáneas*" es decir, predios no previstos en el contrato.

Así pues, de los múltiples memoriales allegados por el contratista y la interventoría, se vislumbra la falta de gestión de la E.A.A.B. para adquirir el inmueble inicialmente acordado para la obra. De lo requerido por el Despacho sustanciador y de lo preguntado en la diligencia realizada el 17 de octubre de 2012, no se desprende con claridad las razones por las cuales no se realizó su compra.

De otra parte, si bien se presentaron inconvenientes geotécnicos que dificultaban y hacían más onerosa la construcción dicho pozo en el sitio originalmente previsto para ello, también lo es que estos fueron sobrevinientes, tal y como lo manifiestan las partes en los memoriales allegados al expediente.

En efecto, se resalta lo expuesto por el representante del Consorcio, el cual afirmó respecto del predio inicialmente acordado que "técnicamente se podía hacer, pero se

Expediente No. 25000-23-27-000-2001-0479-01  
Acumulados Nos. 2000-0428, 2001-0122, 2001-0343  
Actor: GUSTAVO MOYA ÁNGEL Y OTROS  
Acción Popular

incrementaba el costo del proyecto, de ahí que se tomó la decisión de buscar un terreno más favorable para colocar los costos de los pozos para la estación elevadora en unos precios razonables a los presupuestos que ellos tenían" (fl. 11241 vuelto - Cdno. 16)

Para solucionar lo anterior y luego de diferentes actividades, se encontró el predio denominado "Invías"; es unánime la consideración tanto del contratista como del interventor en cuanto a que el lote de terreno ofrece un escenario más favorable dada la masa rocosa existente, lo cual puede evitar asentamientos de naturaleza considerable.

En lo que tiene que ver con el estado actual de la obra, en su momento la Empresa de Acueducto y Alcantarillado de Bogotá manifestó que no existía avance físico en la construcción del pozo y tampoco conexión entre los túneles de emergencia y Tunjuelo - Canoas (fl. 10982 - Cdno. 16).

El representante del Consorcio Canoas señaló que *"no se ha iniciado su construcción, por cuanto la EAAB no ha entregado al Consorcio Canoas el predio donde estaba prevista su construcción, de acuerdo con los diseños iniciales, ni el predio "Invías" donde fue reubicado"* (fl. 4 - Cdno. 17. Tomo I Contestación Comunicado Consorcio Oderbrecht - Cass. Negrillas fuera de texto).

En estos términos, la Sala destaca la importancia de la entrega del predio "Invías", por cuanto es el lugar por donde deben ser extraídas las tuneladoras, y a su vez se estaría evitando que el tiempo de stand by continúe en detrimento de los intereses de las partes y, por supuesto, de la comunidad.

Actualmente las máquinas se encuentran en el predio "Invías", esto es, se ha culminado la obra Interceptor Tunjuelo Canoas - Túnel de Emergencia como se dejó plasmado líneas atrás, en este sentido el pozo con las dimensiones que se tenían

Expediente No. 25000-23-27-000-2001-0479-01  
Acumulados Nos. 2000-0428, 2001-0122, 2001-0343  
Actor: GUSTAVO MOYA ÁNGEL Y OTROS  
Acción Popular

inicialmente pactadas (12 metros de diámetro) solo era posible siempre y cuando el mismo se construyera antes de que llegaran al sitio.

En relación con la no iniciación de las obras del pozo ITC - 12, la razón por la cual no se han podido extraer las tuneladoras y la falta de entrega del nuevo predio, el contratista precisó lo siguiente:

*"PREGUNTADO: ¿Cuáles fueron las razones por las cuales no se han iniciado las obras de construcción del túnel ITC 12? CONTESTÓ: Las razones son varias, hasta hoy no se nos ha entregado predio para construir las obras, es decir, en este momento no tenemos predio para hacer las obras por parte de la Empresa de Acueducto y Alcantarillado de Bogotá, y la segunda razón es que, a raíz de todas estas modificaciones soportados totalmente con todos los estudios del caso, se requiere un acuerdo con el acueducto de las nuevas condiciones comerciales que atañen a construir un nuevo pozo en condiciones muy diferentes que estaban previstas en el contrato originalmente".*

*PREGUNTADO: ¿Por qué no se han podido extraer las máquinas tuneladoras en el predio denominado Invías? CONTESTÓ: Porque las máquinas tuneladoras hacen una excavación de un diámetro mayor que la del túnel que se construye, es decir, es una máquina que sólo puede avanzar hacia adelante, no pueden retroceder nunca, las máquinas sólo podrán retroceder unos centímetros para maniobrar para que la máquina no se entierre; cuando la máquina llega a su sitio de salida, tiene que haber un sitio por el que se pueda sacar las máquinas, para el caso específico del proyecto, debería haber construido un pozo donde lleguen las máquinas y éstas se empiezan a desarmar poco a poco y se empiezan a sacar por el pozo. Si no hay un pozo, sino que las máquinas están enterradas a 70 metros de profundidad, y no se construye el pozo, las máquinas van a quedar enterradas en stand by".*

Se puede concluir, entonces, que no se ha entregado el predio "Invías" al Consorcio Canoas, a pesar de que, desde el 3 de octubre de 2012, el Municipio de Soacha expidió licencia de intervención del espacio público para las obras necesarias para el desarrollo y construcción del pozo ITC - 12 del

Expediente No. 25000-23-27-000-2001-0479-01  
 Acumulados Nos. 2000-0428, 2001-0122, 2001-0343  
 Actor: GUSTAVO MOYA ÁNGEL Y OTROS  
 Acción Popular

proyecto Interceptor Tunjuelo Canoas - Túnel de Emergencia; y que el propio Ministerio de Transporte - Instituto Nacional de Vías a través de la Resolución 6892 de 15 de diciembre de 2011, modificatoria de la Resolución 3473 de 3 de agosto de 2010, *"por la cual se transfiere a título gratuito el derecho real de dominio de un bien fiscal conocido como lote de terreno rural, de forma irregular a favor del Municipio de Soacha"*, autorizó la ejecución de obras requeridas por dicha Empresa.

Asimismo, queda claro que las partes conocían, aún antes de la nueva ubicación del pozo, que si la E.A.A.B. E.S.P. no entregaba el predio oportunamente y las tuneladoras llegaban al predio dispuesto para la construcción del pozo ITC - 12, el diámetro establecido contractualmente sería insuficiente para la extracción de las mismas.

En este contexto, y toda vez que la E.A.A.B. no observó lo decidido por el Despacho Sustanciador, se ordenará que dé cumplimiento a la providencia del 29 de octubre de 2012, en el sentido de:

- El GERENTE GENERAL y al GERENTE DEL SISTEMA MAESTRO DE LA E.A.A.B. E.S.P., entreguen de manera inmediata el predio "Invías" al CONSORCIO CANOAS con el objeto de que se adelanten las actividades contractuales pendientes.
- El GERENTE DEL SISTEMA MAESTRO DE LA E.A.A.B. E.S.P. junto con el Contratista - CONSORCIO CANOAS -, en un término de diez (10) días calendario, adopten la solución técnicamente viable de mínimo costo para la construcción del pozo ITC -12, especialmente, en lo que tiene que ver con la extracción de las máquinas que se encuentran a 63 y 69 metros de profundidad.

#### **IV.4.3.3. INTERCEPTOR SOACHA CONSTRUIDO**

En síntesis, la Sala encuentra lo siguiente:

Expediente No. 25000-23-27-000-2001-0479-01  
Acumulados Nos. 2000-0428, 2001-0122, 2001-0343  
Actor: GUSTAVO MOYA ÁNGEL Y OTROS  
Acción Popular

| OBRA                             | ESTADO        | OBSERVACIÓN                                                      |
|----------------------------------|---------------|------------------------------------------------------------------|
| Interceptor Encor                | Construido    |                                                                  |
| Interceptor<br>Fucha - Tunjuelo  | Construido    |                                                                  |
| Interceptor<br>Tunjuelo - Canoas | Construido    |                                                                  |
| Pozos de inspección<br>9,11 y 12 | Sin construir | Tuneladoras<br>enterradas a 63 y 69<br>metros de<br>profundidad. |
| Interceptor<br>Soacha            | Construido    |                                                                  |

**4.5. LICENCIA AMBIENTAL PARA EL PROYECTO DE DESCONTAMINACIÓN DEL RÍO BOGOTÁ**

Mediante la Ley 99 de 1993, se creó el Ministerio del Medio Ambiente - hoy Ministerio de Ambiente y Desarrollo Sostenible, se reordenó el Sector Público encargado de la gestión y conservación del medio ambiente y los recursos naturales renovables, se organizó el Sistema Nacional Ambiental, SINA, y se dictaron otras disposiciones.

En lo atinente a las licencias ambientales consagradas en el título VIII de la Ley 99 de 1993, se tiene que éstas fueron reglamentadas mediante los Decretos 1753 de 1994, 1728 de 2002, 1180 de 2003, 1220 de 2005 y 2820 de 2010 (vigente).

Cuando el Distrito Capital solicitó licencia ambiental para el desarrollo del proyecto "Descontaminación Río Bogotá" que consistía en la construcción de tres plantas de tratamiento de aguas residuales: Salitre, Fucha y Tunjuelo, para ser ejecutado en gran parte con recursos de la sobretasa ambiental del impuesto predial de la Corporación Autónoma Regional de Cundinamarca CAR, se encontraba vigente el Decreto 1753 de 1994.

De acuerdo con el citado Decreto - artículo 8º - las Corporaciones Autónomas Regionales, eran competentes en su

Expediente No. 25000-23-27-000-2001-0479-01  
Acumulados Nos. 2000-0428, 2001-0122, 2001-0343  
Actor: GUSTAVO MOYA ÁNGEL Y OTROS  
Acción Popular

respectiva jurisdicción para otorgar licencia ambiental para construcción y operación de sistemas de alcantarillado, interceptores marginales, sistemas y estaciones de bombeo y plantas de tratamiento y disposición final de aguas residuales de entidades territoriales bajo la jurisdicción de las mismas.

**El parágrafo 1º** del citado artículo 8º estableció que: "todas las actividades de qué trata este artículo cuando quiera que ellas sean desarrolladas o adelantadas directa o indirectamente por las entidades territoriales son de competencia de la Corporación Autónoma Regional".

**El parágrafo 2º** del mismo consagró que: "cuando las actividades enumeradas en este artículo sean adelantadas por las Corporaciones Autónomas Regionales, la Licencia Ambiental serán otorgadas por el Ministerio del Medio Ambiente".

Por su parte, el artículo 9º, ejusdem, prescribió que ningún proyecto, obra o actividad requeriría más de una licencia ambiental.

En este contexto se determinó que el proyecto "Descontaminación del Río Bogotá" era de competencia de Ministerio de Ambiente, debido a que en su ejecución intervenía de manera directa la Corporación Autónoma Regional de Cundinamarca - CAR, no solo a través de los recursos provenientes de la sobretasa ambiental del impuesto predial, sino en su estructuración y ejecución.

En el expediente No. 368 de la Autoridad Nacional de Licencias ANLA, (antes Dirección de Licencias, Permisos y Trámites del Ministerio de Ambiente) reposa el trámite de la licencia ambiental.

Mediante Resolución No. 817 del 24 de julio de 1995 - artículo 1º - se otorgó al Distrito Capital de Bogotá,

Expediente No. 25000-23-27-000-2001-0479-01  
Acumulados Nos. 2000-0428, 2001-0122, 2001-0343  
Actor: GUSTAVO MOYA ÁNGEL Y OTROS  
Acción Popular

licencia ambiental ordinaria para el proyecto denominado "Descontaminación del río Bogotá".

En el Parágrafo primero de la citada Resolución, se especificó que la licencia ambiental únicamente autorizaba el diseño, construcción, operación y demás actividades de la Planta de Tratamiento Salitre y que para efectos del diseño, construcción y operación de las plantas de los ríos Fucha y Tunjuelo, se deberían presentar al Ministerio del Medio Ambiente los estudios técnico - ambientales respectivos de acuerdo con los términos de referencia que para tales efectos señalara la Entidad, previa solicitud del beneficiario de esta licencia.

Mediante Resolución 577 del 12 de junio de 2000, el Ministerio modificó la licencia ambiental otorgada al proyecto, lo anterior en lo relacionado con el establecimiento de unas obligaciones impuestas al Distrito Capital, como la presentación de los estudios ambientales para la disposición de biosólidos generados en la Planta de Tratamiento de Aguas Residuales El Salitre, en los siguientes puntos:

- Programa de vertimiento de aguas industriales.
- Programa de monitoreo y análisis de aguas residuales, producción, disposición y tratamiento de lodos producidos.

Igualmente estableció en el artículo segundo el Plan de Cumplimiento en el que se determina que la Planta de Tratamientos de Aguas Residuales El Salitre con su primera fase deberá presentar una remoción en el efluente de 40% de DBO5 y 60 % de SST y con la segunda fase deberá presentar un efluente con menos de 30 mg/l de DBO5 y de SST, con un plazo máximo para la operación de dicha fase que se cumpliría en el 2004.

Expediente No. 25000-23-27-000-2001-0479-01  
Acumulados Nos. 2000-0428, 2001-0122, 2001-0343  
Actor: GUSTAVO MOYA ÁNGEL Y OTROS  
Acción Popular

Mediante radicado del Ministerio 3111-1-12444 del 13 de agosto de 2003, el Departamento Técnico Administrativo del Medio Ambiente- DAMA - hoy *Secretaría Distrital de Ambiente* solicitó al Ministerio modificar la licencia ambiental expedida mediante la Resolución 817 del 1996, en el sentido de acoger el esquema ajustado del sistema de tratamiento de aguas residuales para la ciudad de Bogotá, que ha resultado de los estudios adelantados por la Administración Distrital en coordinación con la Corporación Autónoma Regional de Cundinamarca-CAR.

Mediante el Auto No. 899 del 23 de septiembre de 2003, el Ministerio inició trámite administrativo para modificar la licencia ambiental otorgada mediante la Resolución No. 817 del 24 de julio de 1996, modificada por las Resoluciones No. 1121 del 16 de octubre de 1996, 577 del 12 de junio de 2000 y 821 del 17 de agosto de 2000.

Mediante la Resolución No. 1699 del 11 de noviembre de 2005, el Ministerio autorizó al Distrito Capital, las pruebas operativas solicitadas por el mismo, mediante el oficio radicado 2000-2-36900 del 11 de junio de 2004, a realizar en la Planta de Tratamiento de Aguas Residuales El Salitre, las cuales consistían en ejecución de pruebas a nivel prototipo, durante las que se operará la planta con distintas dosificaciones de químicos para establecer su capacidad real y las necesidades de ampliación que se requieran para tratar el caudal de saturación de la cuenca.

Mediante el Acuerdo No. 257 del 30 de noviembre de 2006, el Concejo de Bogotá en ejercicio de sus facultades constitucionales y legales, dictó normas básicas sobre la estructura, organización y funcionamiento de los organismos y de las entidades de Bogotá, Distrito Capital y en su Artículo 101 dispuso Transformar el Departamento Técnico del Medio Ambiente en la Secretaria Distrital de Ambiente, como

Expediente No. 25000-23-27-000-2001-0479-01  
Acumulados Nos. 2000-0428, 2001-0122, 2001-0343  
Actor: GUSTAVO MOYA ÁNGEL Y OTROS  
Acción Popular

organismo del sector Central con autonomía administrativa y financiera.

A través de escrito con radicación en el Ministerio 4120-El-69203 del 6 de julio de 2007, la Secretaría Distrital de Ambiente desistió de la modificación de licencia ambiental presentada en el año 2003, al efecto expuso los argumentos por los cuales había tomado esta decisión y presentó las actividades a seguir en el proyecto. La petición fue atendida parcialmente mediante a través de la expedición del Auto 691 de marzo de 2006, de esa forma se consideró:

- Modificar el artículo segundo de la Resolución 577 de 2000 en lo referente a la ejecución del cronograma de obras presentado en la mencionada resolución específicamente para el desarrollo del proyecto de la PTAR El Salitre

Sin perjuicio de lo anterior fue mediante la Resolución 1929 de 2007 que el MAVDT modificó la resolución 817 y siguientes en el siguiente sentido:

“Ajustar el Plan de Cumplimiento establecido en el artículo Segundo, para la ampliación a 8 m³/s y la Construcción de la Segunda Fase del tratamiento de la Planta de Tratamientos de Aguas Residuales de la Planta de Tratamientos El Salitre, teniendo en cuenta las características generales que se indican a continuación:

| SISTEMA DE TRATAMIENTO           | UBICACIÓN                                   | CARACTERÍSTICAS DEL AFLUENTE                                             | METAS DE DESCONTAMINACIÓN                                                                               | FECHA DE OPERACIÓN                  |
|----------------------------------|---------------------------------------------|--------------------------------------------------------------------------|---------------------------------------------------------------------------------------------------------|-------------------------------------|
| Planta de Tratamiento El salitre | Confluencia del río Salitre y el río Bogotá | Q Medio = 8 m³/s<br>DBO <sub>5</sub> medio = 270 mg/l<br>SST medio = 356 | El Efluente deberá presentar las siguientes condiciones:<br>DBO <sub>5</sub> ≤ 30 mg/l<br>SST ≤ 30 mg/l | La operación de la segunda fase del |

Expediente No. 25000-23-27-000-2001-0479-01  
Acumulados Nos. 2000-0428, 2001-0122, 2001-0343  
Actor: GUSTAVO MOYA ÁNGEL Y OTROS  
Acción Popular

|                                              |  |                                                                                                                                                                                         |  |                                                                                            |
|----------------------------------------------|--|-----------------------------------------------------------------------------------------------------------------------------------------------------------------------------------------|--|--------------------------------------------------------------------------------------------|
| Con<br>Dos<br>Fases<br>de<br>tratam<br>iento |  | mg/l<br><br>Procesos:<br>Desbaste,<br>desarenado,<br>decantación<br>primaria,<br>tratamiento<br>secundario,<br>sedimentación<br>secundaria,<br>desinfección y<br>digestión de<br>lodos. |  | tratam<br>iento<br>inicia<br>rá en<br>el<br>primer<br>trimes<br>tre<br>del<br>año<br>2014. |
|----------------------------------------------|--|-----------------------------------------------------------------------------------------------------------------------------------------------------------------------------------------|--|--------------------------------------------------------------------------------------------|

Con Resolución 993 del 29 de mayo de 2009 el MAVDT autorizó la cesión de la licencia ambiental de la Descontaminación de Rio Bogotá a favor de la Empresa de Acueducto y Alcantarillado de Bogotá D.C. E.A.A.B. - E.S.P.

El 15 de octubre de 2009 la Empresa de Acueducto y Alcantarillado de Bogotá solicitó modificación de la licencia ambiental parta el Proyecto de Descontaminación del Río Bogotá, en los siguientes componentes:

- 1.Planta de tratamiento de aguas residuales Salitre: Con base en lo establecido en el Auto 1929 de ese Ministerio comprende el tratamiento a nivel secundario de los 8m3/s estimados para esa cuenca, asegurando un efluente de 30 mg/I de SST y DB05, para el primer trimestre de 2014.
- 2.Planta de tratamiento de aguas residuales de Canoas: En la cual serán tratadas las aguas servidas generadas por las cuencas Fucha, Tunjuelo y Soacha en dos etapas. La primera correspondiente al tratamiento primario de 14m3/s a poner en marcha en el 2015 y la segunda para el tratamiento secundario del mismo caudal a poner en marcha en el año 2025. Con lo cual no se construirán las plantas de Fucha y Tunjuelo proyectadas en la licencia otorgada mediante Resolución 817 del 96.

Expediente No. 25000-23-27-000-2001-0479-01  
Acumulados Nos. 2000-0428, 2001-0122, 2001-0343  
Actor: GUSTAVO MOYA ÁNGEL Y OTROS  
Acción Popular

A la fecha el Anla no ha resuelto la solicitud de modificación de la licencia ambiental para los componentes antes mencionados, por lo anterior la Sala estima pertinente ordenar que en el término de tres (3) meses siguientes a la notificación de la presente providencia, la Autoridad Nacional de Licencias evalúe la solicitud de la E.A.A.B., realice los requerimientos de información y/o documentales que estime pertinentes y adopte la decisión que corresponda de acuerdo a los parámetros constitucionales, legales y reglamentarios pertinentes.

#### **4.6. CONEXIONES ERRADAS Y REHABILITACIÓN DE REDES CONTEXTO**

En cuanto a las redes de acueducto y alcantarillado de la ciudad, la Sala presentará de manera general el problema de estado y capacidad de las mismas, el cual se encuentra relacionado con el crecimiento poblacional y el deterioro propio de la infraestructura (uso y envejecimiento), para así plantear unas líneas de acción complementarias a las que se vienen ejecutando por parte del Distrito Capital - Empresa de Acueducto y Alcantarillado de Bogotá E.A.A.B.

##### **Crecimiento poblacional**

Desde mediados del siglo pasado la ciudad de Bogotá ha venido experimentando un crecimiento urbano significativo, factores como el desplazamiento forzado, las migraciones y las pocas garantías de seguridad y economía en las zonas rurales agudizan dicha situación. Cuando crece la población o existe redensificación, la infraestructura debe expandirse proporcionalmente con criterios de eficiencia considerando las limitaciones y restricciones del ámbito urbano, aprovechando al máximo las estructuras de saneamiento.

La infraestructura de acueducto y alcantarillado presta servicios a la población actualmente asentada sobre Bogotá. Dichas redes fueron diseñadas y construidas para una ciudad con densidades poblacionales bajas, en un modelo de

Expediente No. 25000-23-27-000-2001-0479-01  
Acumulados Nos. 2000-0428, 2001-0122, 2001-0343  
Actor: GUSTAVO MOYA ÁNGEL Y OTROS  
Acción Popular

urbanización extensivo con promedio cercano a los 190 habitantes por hectárea (ver Figura 1 - densidades <300 habitantes por Ha).

Modelos ecoeficientes como el de redensificación urbana implicarán aumento a valores al menos entre 300 y 400 habitantes por hectárea lo cual requerirá de inversiones en renovación de redes de modo que se garantice la capacidad de transporte para las nuevas necesidades.

#### Magnitud del problema

Por muchos años los sistemas de acueducto y en especial los de alcantarillado en Bogotá, no han contado con programas adecuadamente financiados para su rehabilitación ni renovación. La construcción de la infraestructura actual inició alrededor de los años 20 y 30 del siglo pasado, y los esfuerzos que se han realizado para mantener la prestación de estos servicios básicos dentro de los niveles exigidos por las autoridades distritales y nacionales son notorios; sin embargo los mismos no han sido suficientes ya que en la actualidad la rehabilitación de los sistemas se encuentra con retrasos considerando que la vida útil de las tuberías es de 50 años.

El servicio de alcantarillado sanitario y pluvial de la ciudad está constituido por la infraestructura necesaria para recoger y transportar las aguas residuales hacia las plantas de tratamiento, y para el drenaje adecuado de las aguas lluvias hacia los cuerpos receptores que incluye los ríos, canales y humedales. La ciudad de Bogotá está dividida en cuatro principales cuencas de drenaje denominadas Salitre, Fucha, Tunjuelo y Torca. Dicho drenaje de aguas lluvias se genera principalmente en sentido oriente-occidente siendo el receptor principal el Río Bogotá.

Expediente No. 25000-23-27-000-2001-0479-01  
Acumulados Nos. 2000-0428, 2001-0122, 2001-0343  
Actor: GUSTAVO MOYA ÁNGEL Y OTROS  
Acción Popular

El servicio de alcantarillado sanitario se presta con un conjunto de redes e infraestructuras necesarias para recoger y transportar aguas residuales hacia las plantas de tratamiento. Está constituido por redes troncales y locales de alcantarillado sanitario y los interceptores de aguas residuales; el porcentaje de cada uno de los elementos se discrimina en el siguiente cuadro.

| Tipo de Alcantarillado | Componente de Red               | Longitud (m) | Porcentaje |
|------------------------|---------------------------------|--------------|------------|
| Combinado              |                                 | 1.815.598    | 19,37%     |
|                        | Interceptores                   | 204.066      | 2,18%      |
|                        | Colectores                      | 581.953      | 6,21%      |
|                        | Red Menor                       | 1.028.830    | 10,98%     |
|                        | Estructura Final de vertimiento | 749          | 0,01%      |
| Sanitario              |                                 | 4.685.564    | 49,99%     |
|                        | Interceptores                   | 972.762      | 10,38%     |
|                        | Colectores                      | 462.079      | 4,93%      |
|                        | Red Menor                       | 3.241.615    | 34,59%     |
|                        | Estructura Final de vertimiento | 9.108        | 0,10%      |
| Pluvial                |                                 | 2.871.266    | 30,64%     |
|                        | Interceptores                   | 932.519      | 9,95%      |
|                        | Colectores                      | 916.878      | 9,78%      |
|                        | Red Menor                       | 986.820      | 10,53%     |
|                        | Estructura Final de vertimiento | 35.049       | 0,37%      |
|                        |                                 | 9.372.428    |            |

Tabla 5. Infraestructura del sistema de alcantarillado. Fuente: E.A.A.B.

Se estima que los sistemas de acueducto y alcantarillado requieren inversiones superiores a los 2 billones de pesos

Expediente No. 25000-23-27-000-2001-0479-01  
Acumulados Nos. 2000-0428, 2001-0122, 2001-0343  
Actor: GUSTAVO MOYA ÁNGEL Y OTROS  
Acción Popular

durante los próximos 20 años para mantener y mejorar la capacidad del sistema, contrarrestar el efecto del envejecimiento de las redes y para ampliar la capacidad del sistema de modo que este absorba las nuevas densidades poblacionales.

La ciudad no puede aplazar tales necesidades y requiere de propuestas innovadoras que le permitan dar solución a este grave problema.

### **Aspectos técnicos**

**Rehabilitar:** Los sistemas de tuberías se van deteriorando y perdiendo capacidad hidráulica y estructural debido al uso continuo, dentro de los principales factores que afectan el estado de las redes se encuentran: las cargas vehiculares o de edificaciones a las que se encuentran sometidos, el tipo de vertimientos y residuos que transportan, el historial de mantenimiento y la edad entre otros.

Cuando se habla de rehabilitación de redes y en especial de alcantarillado, subyace el concepto de ingeniería para restituir las condiciones de diseño en cuanto a la funcionalidad o capacidad perdidas en este sentido, lo que se busca cuando se adelanta una rehabilitación de redes es restaurar o recuperar la capacidad perdida utilizando como base parte o la totalidad del activo objeto de rehabilitación.

La rehabilitación restituye las condiciones originales de diseño, incluyendo operatividad y funcionalidad y le agrega valor y vida útil al sistema.

**Reparar:** Los problemas más frecuentes que ocurren en las redes están básicamente relacionados con obstrucciones, pérdida de capacidad, roturas puntuales y malos olores,

Expediente No. 25000-23-27-000-2001-0479-01  
Acumulados Nos. 2000-0428, 2001-0122, 2001-0343  
Actor: GUSTAVO MOYA ÁNGEL Y OTROS  
Acción Popular

problemas que no necesariamente ocasionan y ameritan la rehabilitación y/o renovación de la red. Dentro de los inconvenientes por obstrucción se tiene como causa frecuente los temas de grasas, plásticos, trapos, vidrios, raíces, arenas, piedras.

En cuanto al tema de roturas y fallas que se presentan en las redes de alcantarillado, suelen ser el resultado de varias situaciones entre ellas, un soporte inapropiado del tubo como zanjas de fondo rocoso, fallas debidas a cargas vivas como tuberías colocadas en un inapropiado recubrimiento, movimientos del suelo, daños causados por otras instituciones como gas, electricidad, etc., y finalmente el tema de raíces las cuales llegan a fracturar las redes.

La reparación restituye las condiciones de operatividad y funcionalidad y no le agrega valor ni vida útil al sistema.

**Renovar:** La consecuencia del crecimiento poblacional en un escenario de redensificación urbana, es el aumento de caudales sanitarios que a su vez normalmente son vertidos sobre las redes de alcantarillado existentes, las cuales fueron diseñadas bajo otros parámetros de diseño y otras densidades poblacionales. Por otra parte el efecto de impermeabilización de las superficies en el ámbito urbano como consecuencia de la urbanización ha ocasionado un aumento de las velocidades y caudales que ingresan al sistema pluvial.

Lo anterior se traduce en aumento de los caudales que ingresan a los sistemas de alcantarillado y problemas de capacidad.

El aumento sistemático y planeado de los diámetros de las redes de alcantarillado y de la capacidad de los sistemas existentes a través del empleo de técnicas con o sin zanja se denomina renovación.

Expediente No. 25000-23-27-000-2001-0479-01  
Acumulados Nos. 2000-0428, 2001-0122, 2001-0343  
Actor: GUSTAVO MOYA ÁNGEL Y OTROS  
Acción Popular

La renovación aumenta las condiciones originales de diseño, incluyendo el aumento de la operatividad y funcionalidad y le agrega valor y vida útil al sistema.

#### **Componentes del problema**

1. Envejecimiento y deterioro de la infraestructura existente
2. Aumento de caudales pluviales
3. Conexiones erradas (CE) en sistemas separados
4. Conexiones de la red de alcantarillado sanitario a la red de alcantarillado pluvial

El resultado de estas conexiones es que contribuyen a un alto nivel de carga contaminante en los cuerpos de agua, así como también pueden producir alteraciones en el tratamiento o ineficiencia en la PTAR (Manov.2010).

Como parte del sistema de alcantarillado pluvial (para el caso de estudio Bogotá), se cuenta con canales de drenaje de aguas lluvias, por lo que vertimientos de alcantarillado sanitario a éstos, también pueden ser denominados como CE.

Igualmente, vertimientos ilegales de empresas industriales a los canales de drenaje de aguas lluvias deben ser denominadas como CE, ya que éstos generan malos olores durante temporadas secas debido a una menor dilución de contaminantes.

En un estudio contratado por la EAAB, Grucon-IHE-Soprin (1999) se estimó el porcentaje de aguas negras transportadas en época seca por los alcantarillados de aguas lluvias en diferentes cuencas de la ciudad, y el porcentaje de las áreas de drenaje de la ciudad, que debiendo estar conectadas a los alcantarillados de aguas pluviales se encontraban en realidad aportando a los alcantarillados de aguas negras. En la tabla 8 Se muestran las CE entre los sistemas de alcantarillado,

Expediente No. 25000-23-27-000-2001-0479-01  
Acumulados Nos. 2000-0428, 2001-0122, 2001-0343  
Actor: GUSTAVO MOYA ÁNGEL Y OTROS  
Acción Popular

notándose un gran porcentaje de CE pluvial a sanitario en la Cuenca del Tunjuelo.

| Cuenca                     | Conexión<br>sanitaria a<br>pluvial | Conexión<br>pluvial a<br>sanitario |
|----------------------------|------------------------------------|------------------------------------|
| Torca                      | 24%                                | 42%                                |
| Salitre o Juan<br>Amarillo | 13%                                | 23%                                |
| San Cristobal o<br>Fucha   | 22%                                | 33%                                |
| Tunjuelo                   | 20%                                | 90%                                |

CE entre los sistemas de alcantarillado  
Fuente: GRUCON-IHE-SOPRIN, 1999

Estos porcentajes reflejan la grave problemática de CE que sufre el alcantarillado de la ciudad. Aunque Bogotá cuenta en su mayor parte con un sistema de alcantarillado separado, tiene porcentajes considerables de CE que no le permiten funcionar adecuadamente, generando problemas de contaminación en las fuentes receptoras y problemas de servicio (reboses e inundaciones) en el sistema de alcantarillado. La planta de tratamiento existente, no funciona a satisfacción, ya que recibe caudales adicionales proveniente de aguas lluvias.

**Conexiones directas de la red de alcantarillado pluvial a la red de alcantarillado sanitario**

El resultado de estas conexiones, es la pérdida de la capacidad hidráulica de las redes de alcantarillado sanitario y presencia de reboces desbordes e inundaciones ocasionando problemas de servicio (Mestra, 2008). Estas conexiones pueden ser de una domiciliaria de recolección pluvial al sistema de alcantarillado sanitario, de una domiciliaria de recolección pluvial a un pozo del alcantarillado sanitario, conexión directa del sistema pluvial al sistema sanitario y

Expediente No. 25000-23-27-000-2001-0479-01  
Acumulados Nos. 2000-0428, 2001-0122, 2001-0343  
Actor: GUSTAVO MOYA ÁNGEL Y OTROS  
Acción Popular

de vertimientos o aliviaderos del sistema de recolección pluvial o combinado al sistema de recolección sanitario (Manov, 2010).

La realidad ha demostrado que la magnitud de este tipo de conexiones erradas es muy superior a las cifras que actualmente se consideran en los diseños y, en general, la cantidad de aguas lluvias que entran a un sistema sanitarios es muy grande y está solo limitada por la capacidad del mismo.

Se recomienda cambiar de enfoque para estimar las conexiones erradas y en vez de tratar de predecir cuánta agua lluvia va entrar al sistema sanitario, estimar cuanta es la mínima cantidad de agua lluvia que me produce la dilución necesaria para traer el problema de reboses como un alcantarillado combinado bajo ciertos parámetros de comportamiento ambiental predefinidos.

La subestimación de estos caudales genera un problema de salud pública muy importante debido a los continuos reboses del alcantarillado sanitario cuando llueve, ya sea a través de los pozos de inspección o por las conexiones domiciliarias. Esto, obliga a las empresas operadoras a construir alivios del sistema sanitario al sistema pluvial.

#### **Aumento de caudales sanitarios**

Una de las consecuencias directas de la redensificación urbana es el aumento del consumo de agua potable proporcional al incremento poblacional y consecuentemente aumento en los caudales drenados por el sistema sanitario.

Este aumento de caudales requiere de un aumento de la capacidad del sistema, lo cual a su vez conduce a un aumento de los diámetros.

Expediente No. 25000-23-27-000-2001-0479-01  
Acumulados Nos. 2000-0428, 2001-0122, 2001-0343  
Actor: GUSTAVO MOYA ÁNGEL Y OTROS  
Acción Popular

**Sedimentación y acumulación de grasas, lodos, basuras y escombros**

Durante los eventos de precipitación, la contaminación acumulada en la superficie durante el tiempo seco es lavada y arrastrada hacia la red de colectores. El efecto del lavado de los sedimentos que durante el tiempo seco se han ido depositando en la red pluvial obstruye el sistema con la consecuente disminución en la capacidad de drenaje.

**Falta de hermeticidad del sistema (infiltración excesiva de aguas freáticas)**

Es inevitable la infiltración de aguas subsuperficiales a las redes de sistemas de alcantarillado sanitario, principalmente freáticas, a través de fisuras en los colectores, en juntas ejecutadas deficientemente, en la unión de colectores con pozos de inspección y demás estructuras, y en éstos cuando no son completamente impermeables.

Su estimación debe hacerse en lo posible a partir de aforos en el sistema, en horas cuando el consumo de agua es mínimo, y de consideraciones sobre la naturaleza y permeabilidad del suelo, la topografía de la zona y su drenaje, la cantidad y distribución temporal de la precipitación, la variación del nivel freático con respecto a las cotas clave de los colectores, las dimensiones, estado y tipo de colectores, los tipos, número y calidad constructiva de uniones y juntas, el número de pozos de inspección y demás estructuras, y su calidad constructiva.

La normatividad en Colombia obliga a utilizar un coeficiente para la estimación de esta infiltración en los diseños, no obstante desde el punto de vista de gestión de sistemas existentes este valor resulta bajo teniendo en cuenta una buena parte de las tuberías son antiguas construidas en épocas donde aún no se utilizaba de manera extensiva los

Expediente No. 25000-23-27-000-2001-0479-01  
Acumulados Nos. 2000-0428, 2001-0122, 2001-0343  
Actor: GUSTAVO MOYA ÁNGEL Y OTROS  
Acción Popular

empaques de caucho, además el deterioro estructural de tuberías constituidas por materiales frágiles como el concreto y el gres tienden a tener mayor nivel de fisuramiento y en consecuencia mayores índices de infiltración.

Para determinar los caudales por infiltración lo ideal es realizar aforos en el sistema, en horas de mínimo consumo de agua potable.

Por lo anterior, resulta evidente la necesidad de medidas y correctivos sobre el sistema de acueducto y alcantarillado por parte de la Empresa Distrital, como se dispondrá en la parte resolutive de esta decisión.

**Objetivo 4. Implementar y actualizar los instrumentos de planeación y reglamentación de los usos del suelo**

Estrategias: Fortalecer el ordenamiento territorial como herramienta clave en la planificación y gestión del territorio.

Los programas, planes y proyectos que incluye esta estrategia se dirigen a:

- Articulación de los diferentes instrumentos normativos y de planificación.
- Modificación de los Planes de Ordenamiento Territorial - POT con variables ambientales.
- Modificación de los Planes Básicos de Ordenamiento Territorial PBOT con variables ambientales.
- Modificación de los Esquemas de Ordenamiento Territorial - EOT con variables ambientales.

Sobre el particular, la Sala observa:

Expediente No. 25000-23-27-000-2001-0479-01  
Acumulados Nos. 2000-0428, 2001-0122, 2001-0343  
Actor: GUSTAVO MOYA ÁNGEL Y OTROS  
Acción Popular

El ordenamiento territorial ha sido una de las grandes preocupaciones de las diferentes sociedades a lo largo del tiempo. No obstante, recientemente, y dada la creciente importancia de los aspectos ecológicos y de desarrollo sostenible involucrados en ese ordenamiento, se han establecido lineamientos para ese ordenamiento, entre los cuales la Sala considera valioso mencionar la Carta Europea de Ordenación del Territorio (1983), no solo porque la Unión Europea ha considerado el O.T. como uno de los aspectos estratégicos más importantes para su consolidación, sino porque existen en dicho documento pautas que pueden tomarse en cuenta por las entidades territoriales y ambientales involucradas en el ordenamiento territorial del país. El citado documento lo define como la *"expresión espacial de las políticas económicas, sociales, culturales y ecológicas de toda sociedad. Es a la vez una disciplina científica, una técnica administrativa y una política, concebida como actuación interdisciplinaria y global, cuyo objetivo es un desarrollo equilibrado de las regiones y la organización física del espacio según un concepto rector"*.

Las características de ese ordenamiento territorial se fundan en que *"el hombre y su bienestar"*, así como su interacción con el medio ambiente, constituyen el centro de toda preocupación de la ordenación del territorio, cuyo objetivo es el de ofrecerle un marco y una calidad de vida que aseguren el desarrollo de su personalidad en un entorno organizado a escala humana. La ordenación del territorio debe ser democrática, global, funcional y prospectiva. Debe ser realizada de forma democrática para asegurar la participación de la población afectada y de sus representantes políticos; debe tratar de asegurar la coordinación de las distintas políticas sectoriales y su integración por medio de un enfoque global; debe tener en cuenta la existencia de conciencias regionales basadas en unos valores, una cultura y unos intereses comunes, y estos a veces por encima de las fronteras administrativas y territoriales, teniendo en cuenta

Expediente No. 25000-23-27-000-2001-0479-01  
Acumulados Nos. 2000-0428, 2001-0122, 2001-0343  
Actor: GUSTAVO MOYA ÁNGEL Y OTROS  
Acción Popular

las realidades constitucionales de los distintos países; debe ser prospectiva de manera que pueda analizar las tendencias y el desarrollo a largo plazo de los fenómenos y actuaciones económicos, ecológicos, sociales, culturales y medioambientales y tenerlos en cuenta en su aplicación.

Los objetivos estratégicos sobre los cuales se concibe el ordenamiento territorial en la Unión Europea son cuatro: (i) el desarrollo socioeconómico equilibrado de las regiones, buscando controlar el crecimiento de las regiones congestionadas o de aquellas que presenten una evolución demasiado rápida, alentar el desarrollo de las regiones que mantienen un cierto retraso, mantener o adaptar la infraestructura indispensable para permitir un nuevo impulso de las regiones en decadencia o amenazadas por graves problemas de empleo, principalmente por las migraciones de la mano de obra; (ii) la mejora de la calidad de vida favoreciendo la mejora del marco de vida cotidiano, ya se trate de la vivienda, el trabajo, la cultura o el ocio, e incluso de las relaciones en el interior de las comunidades humanas y el crecimiento del bienestar individual por la creación de empleos y de equipamientos económicos, sociales y culturales que respondan a las aspiraciones de las distintas capas de la población y aseguren, por la elección de su localización, una utilización óptima; (iii) la gestión responsable de los recursos naturales y la protección del medio ambiente, promoviendo estrategias que permitan reducir al máximo los conflictos que surgen entre las crecientes necesidades de recursos naturales y la exigencia de su conservación, trata de asegurar una administración responsable del marco natural, de los recursos del suelo y del subsuelo, del aire y del agua, de los recursos energéticos, de la fauna y de la flora, al igual que el paisaje y el patrimonio cultural y arquitectónico; la utilización racional del territorio trata en particular de controlar la implantación, la organización y el desarrollo de los grandes complejos urbanos e industriales y de las grandes

Expediente No. 25000-23-27-000-2001-0479-01  
Acumulados Nos. 2000-0428, 2001-0122, 2001-0343  
Actor: GUSTAVO MOYA ÁNGEL Y OTROS  
Acción Popular

infraestructuras, así como la protección de las zonas agrícolas y forestales.

En la reunión de Hannover en septiembre de 2000<sup>164</sup> se planteó la importancia de las cuencas fluviales en el ordenamiento territorial, en tanto constituyen un especial desafío para la ordenación del territorio, dado que se concentran sobre franjas del territorio relativamente estrechas. Allí se indicó que estos espacios se caracterizan además por elementos naturales importantes y de gran valor (cursos de agua, zonas húmedas con ecosistemas ricos y sensibles, paisajes de gran calidad, etc.), y por actividades humanas intensivas y diversas como asentamientos industriales y urbanos, infraestructuras de transporte y flujos de tráfico, producción de energía incluidas centrales hidroeléctricas y nucleares, extracción de arenas y gravas, regulación de los cursos de agua, drenaje, o dotaciones para el ocio y actividades recreativas. También existen a menudo paisajes culturales transformados a lo largo de siglos que poseen un elevado potencial ecológico y económico. También se destacó la importancia de que el ordenamiento territorial contribuyera a la reducción de las inundaciones periódicas, que afectan a numerosos sistemas fluviales, procurando reducir los daños económicos al considerar toda la cuenca.

Se propuso además que los conflictos entre las diversas funciones de las cuencas deben prevenirse y reducirse mediante una ordenación territorial integrada, cuyos elementos más significativos deben ser:

- La protección de los ecosistemas particularmente frágiles;
- La gestión más sostenible del sistema acuático en la totalidad de la cuenca, con especial atención en la cantidad de agua, que depende de la retención, la

---

<sup>164</sup> Disponible en <http://www.coe.int/t/dg4/cultureheritage/heritage/cemat/VersionPrincipes/Espagnol.pdf>

Expediente No. 25000-23-27-000-2001-0479-01  
Acumulados Nos. 2000-0428, 2001-0122, 2001-0343  
Actor: GUSTAVO MOYA ÁNGEL Y OTROS  
Acción Popular

infiltración, la resistencia del lecho del curso de agua principal y de sus afluentes;

- La integración de la gestión del sistema hídrico en toda la cuenca con la ordenación del territorio en los diferentes niveles;
- La limitación de la expansión de las zonas urbanas en áreas de valor ecológico y en aquellas que potencialmente estén amenazadas por las inundaciones;
- La prevención de inundaciones mediante el fomento de la cooperación para una gestión integrada y sostenible de las cuencas fluviales transfronterizas y transnacionales;
- La elaboración de programas para conservar el escaso número de ríos naturales y seminaturales que aún existen en Europa, particularmente en los nuevos Estados miembros.

En Colombia, la Constitución Política de 1991, al considerar el proceso de ordenamiento territorial como política de Estado e instrumento de planificación, estableció entre los elementos del proceso: el reconocimiento y protección de la diversidad étnica y cultural de la Nación (artículo 7º); la función social y ecológica de la propiedad (artículo 58), el manejo y aprovechamiento racional de los recursos naturales (artículo 80), el derecho a un ambiente sano y la participación democrática en las decisiones que afecten el medio ambiente, así como la obligación del Estado de proteger la diversidad e integridad del ambiente, conservar las áreas de especial importancia ecológica y fomentar la educación para el logro de estos fines (artículo 79) el deber del Estado de planificar el manejo y aprovechamiento de los recursos naturales, para garantizar su desarrollo sostenible, su conservación, restauración o sustitución, así como de prevenir y controlar los factores de deterioro ambiental (artículo 80); la determinación de los deberes de la persona y el ciudadano entre ellos: respetar los derechos ajenos y no abusar de los propios; y proteger los recursos culturales y

Expediente No. 25000-23-27-000-2001-0479-01  
Acumulados Nos. 2000-0428, 2001-0122, 2001-0343  
Actor: GUSTAVO MOYA ÁNGEL Y OTROS  
Acción Popular

naturales del país y velar por la conservación de un ambiente sano (artículo 95); y la intervención del Estado en la explotación de los recursos naturales, en el uso del suelo, en la producción, distribución, utilización y consumo de los bienes, y en los servicios públicos y privados, para racionalizar la economía con el fin de conseguir en el plano nacional y territorial, en un marco de sostenibilidad fiscal, el mejoramiento de la calidad de vida de los habitantes, la distribución equitativa de las oportunidades y los beneficios del desarrollo y la preservación de un ambiente sano. Igualmente la intervención del Estado se orientará a (i) dar pleno empleo a los recursos humanos y asegurar, de manera progresiva, que todas las personas, en particular las de menores ingresos, tengan acceso efectivo al conjunto de los bienes y servicios básicos y (ii) a promover la productividad y competitividad y el desarrollo armónico de las regiones (Artículo 334).

Ahora bien, cabe destacar en este recuento normativo de la Carta, que si bien conforme al artículo 307 de la Constitución Política, la función de reglamentar los usos del suelo al igual que la de dictar las normas para la preservación del patrimonio ecológico y cultural del municipio se asignó a los concejos municipales, el constituyente no atribuyó a un órgano especial la función de preservar el medio ambiente y garantizar el desarrollo sostenible, sino que lo impuso como un deber primordial del Estado en todas sus manifestaciones, de manera que tales normas permean todas las decisiones de los poderes públicos y de los particulares que ejercen funciones públicas, así como las de las personas y ciudadanos, por lo cual el poder público debe actuar en forma coordinada, teniendo en cuenta que el medio ambiente no se identifica con uno de sus aspectos como un río, el mar, el bosque, sino que es un complejo equilibrio entre los bienes y servicios que componen una macro realidad ambiental, que supera los límites jurisdiccionales tanto intraestatales como interestatales.

Expediente No. 25000-23-27-000-2001-0479-01  
Acumulados Nos. 2000-0428, 2001-0122, 2001-0343  
Actor: GUSTAVO MOYA ÁNGEL Y OTROS  
Acción Popular

Como lo señaló la Corte Constitucional en sentencia C-058 de 1994<sup>165</sup>, la inclusión en la Carta Política del concepto de desarrollo sostenible *"ha buscado superar una perspectiva puramente conservacionista en la protección del medio ambiente, al intentar armonizar el derecho al desarrollo indispensable para la satisfacción de las necesidades humanas-con las restricciones derivadas de la protección al medio ambiente. El desarrollo sostenible debe permitir elevar la calidad de vida de las personas y el bienestar social pero sin sobrepasar la capacidad de carga de los ecosistemas que sirven de base biológica y material a la actividad productiva.*

En este sentido, la Ley 388 de 1997 define el ordenamiento territorial y distrital como *"un conjunto de acciones político-administrativas y de planificación física concertadas, emprendidas por los municipios o distritos y áreas metropolitanas, en ejercicio de la función pública que les compete, dentro de los límites fijados por la Constitución y las leyes, en orden a disponer de instrumentos eficientes para orientar el desarrollo del territorio bajo su jurisdicción y regular la utilización, transformación y ocupación del espacio, de acuerdo con las estrategias de desarrollo socioeconómico y en armonía con el medio ambiente y las tradiciones históricas y culturales".*

Según el artículo 9º de la citada Ley *"el instrumento básico para desarrollar el proceso de ordenamiento del territorio municipal es el Plan de Ordenamiento Territorial que se define como el conjunto de objetivos, directrices, políticas, estrategias, metas, programas, actuaciones y normas adoptadas para orientar y administrar el desarrollo físico del territorio y la utilización del suelo".*

---

<sup>165</sup> Magistrado Ponente: Dr. Alejandro Martínez Caballero.

Expediente No. 25000-23-27-000-2001-0479-01  
Acumulados Nos. 2000-0428, 2001-0122, 2001-0343  
Actor: GUSTAVO MOYA ÁNGEL Y OTROS  
Acción Popular

En tal virtud, establece el mismo artículo que, según el número de habitantes los planes de ordenamiento del territorio se denominarán:

- a) Planes de ordenamiento territorial: elaborados y adoptados por las autoridades de los distritos y municipios con población superior a los 100.000 habitantes;
- b) Planes básicos de ordenamiento territorial: elaborados y adoptados por las autoridades de los municipios con población entre 30.000 y 100.000 habitantes;
- c) Esquemas de ordenamiento territorial: elaborados y adoptados por las autoridades de los municipios con población inferior a los 30.000 habitantes.

El ordenamiento territorial de municipios y distritos pretende complementar la planificación económica y social con la dimensión territorial, racionalizar las intervenciones sobre el territorio y orientar su desarrollo y aprovechamiento sostenible, mediante:

- 1. La definición de las estrategias territoriales de uso, ocupación y manejo del suelo, en función de los objetivos económicos, sociales, urbanísticos y ambientales.*
- 2. El diseño y adopción de los instrumentos y procedimientos de gestión y actuación que permitan ejecutar actuaciones urbanas integrales y articular las actuaciones sectoriales que afectan la estructura del territorio municipal o distrital.*
- 3. La definición de los programas y proyectos que concretan estos propósitos.*

La misma Ley 388, ordena a los planeadores del ordenamiento territorial tomar en cuenta (i) las relaciones intermunicipales, metropolitanas y regionales; (ii) las condiciones de diversidad étnica y cultural, reconociendo el pluralismo y el respeto a la diferencia; (iii) la incorporación de instrumentos que permitan regular las dinámicas de transformación territorial de manera que se

Expediente No. 25000-23-27-000-2001-0479-01  
Acumulados Nos. 2000-0428, 2001-0122, 2001-0343  
Actor: GUSTAVO MOYA ÁNGEL Y OTROS  
Acción Popular

optimice la utilización de los recursos naturales y humanos para el logro de condiciones de vida dignas para la población actual y las generaciones futuras.

Igualmente, es clara la Ley 388 al definir unas normas de superior jerarquía a que deben someterse las entidades territoriales en la adopción de sus Planes de Ordenamiento Territorial a saber:

*1. Las relacionadas con la conservación y protección del medio ambiente, los recursos naturales y la prevención de amenazas y riesgos naturales, así:*

*a) Las directrices, normas y reglamentos expedidos en ejercicio de sus respectivas facultades legales, por las entidades del Sistema Nacional Ambiental, en los aspectos relacionados con el ordenamiento espacial del territorio, de acuerdo con la Ley 99 de 1993 y el Código de Recursos Naturales, tales como las limitaciones derivadas del estatuto de zonificación de uso adecuado del territorio y las regulaciones nacionales sobre uso del suelo en lo concerniente exclusivamente a sus aspectos ambientales;*

*b) Las regulaciones sobre conservación, preservación, uso y manejo del medio ambiente y de los recursos naturales renovables, en las zonas marinas y costeras; las disposiciones producidas por la Corporación Autónoma Regional o la autoridad ambiental de la respectiva jurisdicción, en cuanto a la reserva, alindamiento, administración o sustracción de los distritos de manejo integrado, los distritos de conservación de suelos, las reservas forestales y parques naturales de carácter regional; las normas y directrices para el manejo de las cuencas hidrográficas expedidas por la Corporación Autónoma Regional o la autoridad ambiental de la respectiva jurisdicción; y las directrices y normas expedidas por las autoridades ambientales para la conservación de las áreas de especial importancia ecosistémica;*

*c) Las disposiciones que reglamentan el uso y funcionamiento de las áreas que integran el sistema de parques nacionales naturales y las reservas forestales nacionales;*

*d) Las políticas, directrices y regulaciones sobre prevención de amenazas y riesgos naturales, el señalamiento y localización de las áreas de riesgo*

Expediente No. 25000-23-27-000-2001-0479-01  
Acumulados Nos. 2000-0428, 2001-0122, 2001-0343  
Actor: GUSTAVO MOYA ÁNGEL Y OTROS  
Acción Popular

*para asentamientos humanos, así como las estrategias de manejo de zonas expuestas a amenazas y riesgos naturales.*

Cabe recordar aquí, que el Decreto 1640 de 2012, define lo relativo a los Planes de Ordenación y Manejo de las Cuencas Hidrográficas, los cuales se constituyen en norma de superior jerarquía y determinante ambiental para la elaboración y adopción de los planes de ordenamiento territorial.

Es evidente hasta aquí que la voluntad tanto del constituyente como del legislador ha sido priorizar la conservación del medio ambiente y el desarrollo sostenible en los planes de ordenamiento territorial, asunto que no pueden dejar de lado los concejos municipales al expedir los correspondientes POTs.

Por su parte, la Ley 1454 de 2011, "*por la cual se dictan normas orgánicas sobre ordenamiento territorial y se modifican otras disposiciones*" implica un avance en la concepción del ordenamiento territorial en Colombia al señalar en su artículo 2 que "*el ordenamiento territorial es un instrumento de planificación y de gestión de las entidades territoriales y un proceso de construcción colectiva de país, que se da de manera progresiva, gradual y flexible, con responsabilidad fiscal, tendiente a lograr una adecuada organización político administrativa del Estado en el territorio, para facilitar el desarrollo institucional, el fortalecimiento de la identidad cultural y el desarrollo territorial, entendido este como desarrollo económicamente competitivo, socialmente justo, ambientalmente y fiscalmente sostenible, regionalmente armónico, culturalmente pertinente, atendiendo a la diversidad cultural y físico-geográfica de Colombia*".

Además de precisar en este nuevo ámbito del ordenamiento territorial las nociones de gradualidad, flexibilidad, desarrollo socialmente justo y ambientalmente sostenible y

Expediente No. 25000-23-27-000-2001-0479-01  
Acumulados Nos. 2000-0428, 2001-0122, 2001-0343  
Actor: GUSTAVO MOYA ÁNGEL Y OTROS  
Acción Popular

diversidad cultural y físico geográfica del país, la Ley 1454 de 2011 determina 17 principios rectores del ordenamiento territorial, que no son taxativos, y que sin desconocer la autonomía de las entidades territoriales para la gestión de sus asuntos, apuntan a: (i) una descentralización que incluya el traslado de los poderes correspondientes y el aseguramiento de los recursos necesarios; (ii) la posibilidad de que los departamentos y municipios ubicados en zonas de frontera adelanten programas de cooperación con entidades territoriales limítrofes de un Estado; (iii) la promoción del establecimiento de las Regiones de Planeación y Gestión, regiones administrativas y de planificación y la proyección de Regiones Territoriales como marcos de relaciones geográficas, económicas, culturales, y funcionales, a partir de ecosistemas bióticos y biofísicos, de identidades culturales locales, de equipamientos e infraestructuras económicas y productivas y de relaciones entre las formas de vida rural y urbana; (iv) la conciliación del crecimiento económico con la sostenibilidad ambiental; (v) la participación, concertación y cooperación para que los ciudadanos tomen parte activa en las decisiones que inciden en la orientación y organización territorial; (vi) la solidaridad y equidad territorial orientadas a que las entidades territoriales de mayor capacidad política, económica y fiscal, apoyen aquellas entidades de menor desarrollo relativo, en procura de garantizar el acceso equitativo a las oportunidades y beneficios del desarrollo, para elevar la calidad de vida de la población; (vii) el reconocimiento de las diferencias geográficas, institucionales, económicas, sociales, étnicas y culturales del país; (viii) la prospectiva como una visión compartida de país a largo plazo, con propósitos estratégicos que guíen el tipo de organización territorial requerida; (ix) la paz, la convivencia el fortalecimiento del tejido social y la legitimidad del Estado; (x) la asociatividad entre las entidades territoriales e instancias de integración territorial para producir economías de escala, generar

Expediente No. 25000-23-27-000-2001-0479-01  
Acumulados Nos. 2000-0428, 2001-0122, 2001-0343  
Actor: GUSTAVO MOYA ÁNGEL Y OTROS  
Acción Popular

sinergias y alianzas competitivas, para la consecución de objetivos de desarrollo económico y territorial comunes; (xi) la responsabilidad y transparencia a través de la promoción del control social de la gestión pública incorporando ejercicios participativos en la planeación, ejecución y rendición final de cuentas; (xii) la búsqueda de la equidad social y el equilibrio territorial así como el desarrollo equilibrado de las diferentes formas de división territorial; (xiii) la promoción de mecanismos asociativos que privilegien la optimización del gasto público y el buen gobierno en su conformación y funcionamiento; y (xiv) la posibilidad de que los pueblos indígenas, las comunidades afrodescendientes, los raizales y la población ROM ejerzan su derecho de planeación y gestión dentro de la entidad territorial respectiva en armonía y concordancia con las demás comunidades y entidades territoriales.

A lo anterior habría de agregarse la transversalidad, en el entendido que la ordenación del territorio requiere de actuaciones donde converja el conocimiento proporcionado por diferentes disciplinas y sectores al igual que la intervención de diferentes autoridades cuando se trata especialmente del manejo de cuencas hidrográficas.

También considera la Sala que deben añadirse a esos principios, los relacionados con los riesgos del cambio climático, considerando que (i) los planes de ordenamiento territorial deben tomar en cuenta lo establecido en el Plan Nacional de Adaptación al Cambio Climático (PNACC) que busca reducir el riesgo y los impactos socio-económicos y ambientales asociados a la variabilidad y al cambio climático, y a incorporar la prevención y gestión del riesgo ambiental en las decisiones relacionadas con el desarrollo territorial y sectorial y que (ii) según el reporte N° 4 sobre el manejo del agua bajo circunstancias de incertidumbre

Expediente No. 25000-23-27-000-2001-0479-01  
Acumulados Nos. 2000-0428, 2001-0122, 2001-0343  
Actor: GUSTAVO MOYA ÁNGEL Y OTROS  
Acción Popular

y riesgo<sup>166</sup>, un análisis holístico del manejo de los recursos hídricos, debe incluir por parte de las autoridades ambientales una infatigable atención a lo que se ha denominado fuerzas externas, derivadas del hecho de que muchas de las decisiones que afectan el agua no son adoptadas por las autoridades ambientales sino por otros actores de la sociedad civil, el sector empresarial, y actores gubernamentales ajenos al manejo del agua cuyas decisiones relacionadas con la formulación de políticas, destinación de recursos y otros asuntos políticos e instrumentales afectan los recursos hídricos, directamente mediante la ubicación y la demanda, e indirectamente a través de asuntos relacionados con el crecimiento económico, las políticas demográficas y las presiones sociales que influyen las percepciones y actitudes humanas acerca del ambiente, incluyendo los recursos de agua, influyendo a su vez las presiones que la gente ejerce a través de la demanda de agua y sus usos, además de las presiones ejercidas por el cambio climático.

La incertidumbre sobre la disponibilidad de agua resulta tanto de la variabilidad natural del cambio climático y del ciclo hidrológico como de la influencia antropogénica en el ambiente, factores éstos que crean un ambiente climático e hidrológico no estacionario dentro del cual deben administrarse hoy los recursos hídricos, contrario a la creencia común de que los cambios futuros en el agua pueden simularse adecuadamente con los datos históricos proporcionados por las estadísticas.

De esta manera, resulta indispensable que las autoridades con funciones en material de ordenamiento territorial incluyan recursos y herramientas destinadas a definir cambios climáticos que amenacen los respectivos territorios, mejorando los planes de contingencia relativos a los riesgos

---

<sup>166</sup> "Managing Water under Uncertainty and Risk" The United Nations World Water Development Report 4. Published in 2012 by the United Nations Educational, Scientific and Cultural Organization. Disponible en <http://unesdoc.unesco.org/images/0021/002156/215644e.pdf>

Expediente No. 25000-23-27-000-2001-0479-01  
Acumulados Nos. 2000-0428, 2001-0122, 2001-0343  
Actor: GUSTAVO MOYA ÁNGEL Y OTROS  
Acción Popular

ambientales al igual que su respuesta ante la realización de los mismos.

La misma Ley 1454 de 2011 establece en su artículo 29 una distribución de competencias entre la nación, los departamentos y los municipios en materia de ordenamiento del territorio, buscando la adecuada coordinación entre ellos así:

### **1. De la Nación**

- a) *Establecer la política general de ordenamiento del territorio en los asuntos de interés nacional: áreas de parques nacionales y áreas protegidas.*
- b) *Localización de grandes proyectos de infraestructura.*
- c) *Determinación de áreas limitadas en uso por seguridad y defensa.*
- d) *Los lineamientos del proceso de urbanización y el sistema de ciudades.*
- e) *Los lineamientos y criterios para garantizar la equitativa distribución de los servicios públicos e infraestructura social de forma equilibrada en las regiones.*
- f) *La conservación y protección de áreas de importancia histórica y cultural.*
- g) *Definir los principios de economía y buen gobierno mínimos que deberán cumplir los departamentos, los Distritos, los municipios, las áreas metropolitanas, y cualquiera de las diferentes alternativas de asociación, contratos o convenios plan o delegaciones previstas en la presente ley.*

*Parágrafo. Las competencias asignadas a la Nación en los literales anteriores se adelantarán en coordinación con los entes territoriales.*

### **2. Del Departamento**

- a) *Establecer directrices y orientaciones para el ordenamiento de la totalidad o porciones específicas de su territorio, especialmente en áreas de conurbación con el fin de determinar los escenarios de uso y ocupación del espacio, de acuerdo con el potencial óptimo del ambiente y en función de los objetivos de desarrollo, potencialidades y limitantes biofísicos, económicos y culturales.*
- b) *Definir las políticas de asentamientos poblacionales y centros urbanos, de tal manera que facilite el desarrollo de su territorio.*

Expediente No. 25000-23-27-000-2001-0479-01  
Acumulados Nos. 2000-0428, 2001-0122, 2001-0343  
Actor: GUSTAVO MOYA ÁNGEL Y OTROS  
Acción Popular

- c) Orientar la localización de la infraestructura física-social de manera que se aprovechen las ventajas competitivas regionales y se promueva la equidad en el desarrollo municipal.
- d) Integrar y orientar la proyección espacial de los planes sectoriales departamentales, los de sus municipios y entidades territoriales indígenas.
- e) En desarrollo de sus competencias, los departamentos podrán articular sus políticas, directrices y estrategias de ordenamiento físico-territorial con los planes, programas, proyectos y actuaciones sobre el territorio, mediante la adopción de planes de ordenamiento para la totalidad o porciones específicas de su territorio.
- f) La competencia para establecer las directrices y orientaciones específicas para el ordenamiento del territorio en los municipios que hacen parte de un Área Metropolitana correspondiente a estas, la cual será ejercida con observancia a los principios para el ejercicio de las competencias establecidos en la presente ley.
- g) Los departamentos y las asociaciones que estos conformen podrán implementar programas de protección especial para la conservación y recuperación del medio ambiente.

### **3. De los Distritos Especiales**

- a) Dividir el territorio distrital en localidades, de acuerdo a las características sociales de sus habitantes y atribuir competencias y funciones administrativas.
- b) Organizarse como áreas metropolitanas, siempre que existan unas relaciones físicas, sociales y económicas que den lugar al conjunto de dicha característica y coordinar el desarrollo del espacio territorial integrado por medio de la racionalización de la prestación de sus servicios y la ejecución de obras de interés metropolitano.
- c) Dirigir las actividades que por su denominación y su carácter les corresponda.

### **4. Del Municipio**

- a) Formular y adoptar los planes de ordenamiento del territorio.
- b) Reglamentar de manera específica los usos del suelo, en las áreas urbanas, de expansión y rurales, de acuerdo con las leyes.
- c) Optimizar los usos de las tierras disponibles y coordinar los planes sectoriales, en armonía con las políticas nacionales y los planes departamentales y metropolitanos.

Expediente No. 25000-23-27-000-2001-0479-01  
 Acumulados Nos. 2000-0428, 2001-0122, 2001-0343  
 Actor: GUSTAVO MOYA ÁNGEL Y OTROS  
 Acción Popular

*Parágrafo 1º. La distribución de competencias que se establece en este artículo se adelantará bajo los principios de descentralización, concurrencia y complementariedad de las acciones establecidas por las entidades territoriales y en coordinación con lo dispuesto por sus autoridades respectivas en los instrumentos locales y regionales de planificación.*

*Parágrafo 2º. Al nivel metropolitano le corresponde la elaboración de planes integrales de desarrollo metropolitano con perspectiva de largo plazo, incluyendo el componente de ordenamiento físico territorial y el señalamiento de las normas obligatoriamente generales que definan los objetivos y criterios a los que deben acogerse los municipios al adoptar los planes de ordenamiento territorial en relación con las materias referidas a los hechos metropolitanos, de acuerdo con lo previsto en la Ley de Áreas Metropolitanas.*

La articulación y coordinación de la nación y las entidades territoriales en la elaboración de los Planes de Ordenamiento Territorial, así como la necesidad de respetar en su elaboración las normas relacionadas con el medio ambiente, requieren de una visión más amplia sobre la sostenibilidad del territorio y el agua como su principal componente, tal como lo señala Ernesto Guhl en el Documento "La Región Hídrica Cundinamarca-Bogotá. Una Propuesta Conceptual"<sup>167</sup>.

Además, deben establecerse los mecanismos que permitan a las personas y los diferentes actores vinculados a un espacio geográfico, apropiarse de su territorio y de manera informada tomar las decisiones tanto individuales como colectivas respecto a los usos sostenibles del mismo.

Finalmente cabe anotar que conforme al artículo 61 de la Ley 99 de 1993, La Sabana de Bogotá, sus páramos, aguas, valles aledaños, cerros circundantes y sistemas montañosos son de interés ecológico nacional y que mediante el Decreto 1480 de 2007 se priorizó el ordenamiento y la intervención, entre otras, de la cuenca del Río Bogotá, lo que obliga a las

---

<sup>167</sup> Disponible en <https://www.dropbox.com/s/v7ixnpdqj0rf79m/Quinaxi-EEAB%202013.pdf>

Expediente No. 25000-23-27-000-2001-0479-01  
 Acumulados Nos. 2000-0428, 2001-0122, 2001-0343  
 Actor: GUSTAVO MOYA ÁNGEL Y OTROS  
 Acción Popular

entidades territoriales con jurisdicción en ella, a que adopten las acciones necesarias para prevenir y mitigar los factores de riesgo asociados a la citada cuenca.

#### Objetivo 5. Fortalecer los instrumentos económicos

Las tasas retributivas y por uso del agua son consideradas dentro de la política como los instrumentos económicos más utilizados e implementados en nuestro país. Además este instrumento fue reglamentado por el Gobierno Nacional y aplicado en el territorio nacional por parte de las CAR a partir del año 1997 y éstas han contribuido a la gestión integral del recurso hídrico, generando beneficios públicos en términos de reducción de los niveles de cargas contaminantes a los cuerpos de agua.

La **tasa retributiva**, *"tiene por objeto cobrar por las consecuencias nocivas de la introducción u arrojo de desechos o de desperdicios agrícolas, mineros o industriales, aguas negras o servidas de cualquier origen, humos, vapores y sustancias nocivas que sean resultado de actividades antrópicas o propiciadas por el hombre o, actividades económicas o de servicio, sean o no lucrativas"*.<sup>168</sup>

##### a. Tasa retributiva y compensatoria -Tarifas.

Con la expedición de la Ley 99 de 1993, la tarifa de dichas tasas se sujetó al desarrollo del sistema y método de cálculo previsto en el artículo 42, hoy adicionado por el artículo 211 de la Ley 1450 de 2010, disposición que permite trasladar los costos a quienes se benefician por la utilización del agua.

El artículo 42 de la Ley 99 de 1993, señala las actividades sujetas al pago de tasas retributivas por las consecuencias nocivas que puedan generar, así como la posibilidad de fijar tasas para compensar los gastos de mantenimiento de

<sup>168</sup>Política Nacional para la gestión integral del recurso hídrico, p.80.

Expediente No. 25000-23-27-000-2001-0479-01  
 Acumulados Nos. 2000-0428, 2001-0122, 2001-0343  
 Actor: GUSTAVO MOYA ÁNGEL Y OTROS  
 Acción Popular

renovación de los recursos naturales renovables; establece las reglas para calcular el cobro de las tasas retributivas y compensatorias y el método para fijar el monto tarifario por concepto de tasas retributivas y compensatorias.<sup>169</sup>

Esta disposición fue adicionada por el artículo 211 de la Ley del Plan de Desarrollo 2010-2014, así:

"ARTÍCULO 211. *TASAS RETRIBUTIVAS Y COMPENSATORIAS.* Modifíquese y adicionense los siguientes párrafos al artículo 42 de la Ley 99 de 1993:

---

<sup>169</sup> **Artículo 42°.-Tasas Retributivas y Compensatorias.** La utilización directa o indirecta de la atmósfera, del agua y del suelo, para introducir o arrojar desechos o desperdicios agrícolas, mineros o industriales, aguas negras o servidas de cualquier origen, humos, vapores y sustancias nocivas que sean resultado de actividades antrópicas o propiciadas por el hombre, o actividades económicas o de servicio, sean o no lucrativas, se sujetará al pago de tasas retributivas por las consecuencias nocivas de las actividades expresadas.

También podrán fijarse tasas para compensar los gastos de mantenimiento de la renovabilidad de los recursos naturales renovables. Queda así subrogado el artículo 18 del Decreto 2811 de 1974.

Para la definición de los costos y beneficios de que trata el inciso 2o. del artículo 338 de la Constitución Nacional, sobre cuya base hayan de calcularse las tasas retributivas y compensatorias a las que se refiere el presente artículo, creadas de conformidad con lo dispuesto por el Código Nacional de Recursos Naturales Renovables y de Protección al Medio Ambiente, Decreto 2811 de 1974, se aplicará el sistema establecido por el conjunto de las siguientes reglas: a) La tasa incluirá el valor de depreciación del recurso afectado; b) El Ministerio del Medio Ambiente teniendo en cuenta los costos sociales y ambientales del daño, y los costos de recuperación del recurso afectado, definirá anualmente las bases sobre las cuales se hará el cálculo de la depreciación; c) El cálculo de la depreciación incluirá la evaluación económica de los daños sociales y ambientales causados por la respectiva actividad. Se entiende por daños sociales, entre otros, los ocasionados a la salud humana, el paisaje, la tranquilidad pública, los bienes públicos y privados y demás bienes con valor económico directamente afectados por la actividad contaminante. Se entiende por daño ambiental el que afecte el normal funcionamiento de los ecosistemas o la renovabilidad de sus recursos y componentes; d) El cálculo de costos así obtenido, será la base para la definición del monto tarifario de las tasas.

Con base en el conjunto de reglas establecidas en el sistema de que trata el inciso anterior, el Ministerio del Medio Ambiente aplicará el siguiente método en la definición de los costos sobre cuya base hará la fijación del monto tarifario de las tasas retributivas y compensatorias: a) A cada uno de los factores que incidan en la determinación de una tasa, se le definirán las variables cuantitativas que permitan la medición del daño; b) Cada factor y sus variables deberá tener un coeficiente que permita ponderar su peso en el conjunto de los factores y variables considerados; c) Los coeficientes se calcularán teniendo en cuenta la diversidad de las regiones, la disponibilidad de los recursos, su capacidad de asimilación, los agentes contaminantes involucrados, las condiciones socioeconómicas de la población afectada y el costo de oportunidad del recurso de que se trate; d) Los factores, variables y coeficientes así determinados serán integrados en fórmulas matemáticas que permitan el cálculo y determinación de las tasas correspondientes.

Expediente No. 25000-23-27-000-2001-0479-01  
 Acumulados Nos. 2000-0428, 2001-0122, 2001-0343  
 Actor: GUSTAVO MOYA ÁNGEL Y OTROS  
 Acción Popular

**"Parágrafo 1o.** Las tasas retributivas y compensatorias se aplicarán incluso a la contaminación causada por encima de los límites permisibles sin perjuicio de la imposición de las medidas preventivas y sancionatorias a que haya lugar. El cobro de esta tasa no implica bajo ninguna circunstancia la legalización del respectivo vertimiento".

**Parágrafo 2o.** Los recursos provenientes del recaudo de las tasas retributivas se destinarán a proyectos de inversión en descontaminación y monitoreo de la calidad del recurso respectivo. Para cubrir los gastos de implementación y seguimiento de la tasa, la autoridad ambiental competente podrá utilizar hasta el 10% de los recursos recaudados.

**Parágrafo 3o.** Los recursos provenientes del recaudo de las tasas compensatorias se destinarán a la **protección y renovación del recurso natural respectivo, teniendo en cuenta las directrices del Ministerio de Ambiente, Vivienda y Desarrollo Territorial**, o quien haga sus veces. Para cubrir gastos de implementación y seguimiento de la tasa, la autoridad ambiental podrá utilizar hasta el diez por ciento (10%) de los recaudos". (Se destaca).

El Decreto 2667 de 2012, por el cual se reglamenta la tasa retributiva por la utilización directa e indirecta del agua como receptor de los vertimientos puntuales, y se toman otras determinaciones, derogó el Decreto 3100 de 2003 y fue expedido ante la modificación hecha por el Plan de Desarrollo, Ley 1450 de 2011, al artículo 42 de la Ley 99 de 1993.

El reglamento en el artículo 20 dispuso:

**Artículo 20. Destinación del recaudo.** Los recaudos de la tasa retributiva por vertimientos al agua se **destinarán a proyectos de inversión en descontaminación hídrica y monitoreo de la calidad del agua.**

Para cubrir los gastos de implementación y seguimiento de la tasa, la autoridad ambiental competente podrá utilizar hasta el 10% de los recursos recaudados de la tasa retributiva.

**Para lo anterior, las autoridades ambientales competentes deberán realizar las distribuciones en sus presupuestos de ingresos y gastos a las que haya**

Expediente No. 25000-23-27-000-2001-0479-01  
Acumulados Nos. 2000-0428, 2001-0122, 2001-0343  
Actor: GUSTAVO MOYA ÁNGEL Y OTROS  
Acción Popular

**lugar para garantizar la destinación específica de la tasa.** (Se destaca)

El artículo 15 del mismo decreto dispuso:

Artículo 15. Tarifa mínima de la tasa retributiva (Tm). El Ministerio de Ambiente y Desarrollo Sostenible establecerá anualmente mediante resolución, el valor de la tarifa mínima de la tasa retributiva para los parámetros sobre los cuales se cobrará dicha tasa, basado en los costos directos de remoción de los elementos, sustancias o parámetros contaminantes presentes en los vertimientos líquidos, los cuales forman parte de los costos de recuperación del recurso afectado.

Parágrafo. Las tarifas mínimas de los parámetros objeto de cobro establecidas en la Resolución 273 de 1997 actualizada por la Resolución 372 de 1998, **continuarán vigentes hasta tanto el Ministerio de Ambiente y Desarrollo Sostenible las adicione, modifique o sustituya.**

De otra parte, la Resolución CRA 271 de 2003 "*Por la cual se modifica el Artículo 1.2.1.1 y la Sección 5.2.1 del Capítulo 2, del Título V de la Resolución CRA 151 de 2001*", establece el procedimiento único para el trámite de las modificaciones de carácter particular de las fórmulas tarifarias y/o del costo económico de referencia aplicables a los servicios públicos de acueducto, alcantarillado y aseo, cuando se presentan las siguientes causales: acuerdo entre la persona prestadora y la Comisión; graves errores en su cálculo que lesionan injustamente los intereses de los usuarios o de la persona prestadora, o; razones de caso fortuito o fuerza mayor que comprometan en forma grave la capacidad financiera de la persona prestadora para continuar prestando los servicios en las condiciones tarifarias previstas.

El Decreto 1013 de 2005 estableció la metodología para determinar el equilibrio entre subsidios y contribuciones.

La Comisión de Regulación de Agua Potable y Saneamiento Básico expidió la Resolución CRA 287 de 2004, modificada por la Resolución 306 de 2004, por la cual se establece la

Expediente No. 25000-23-27-000-2001-0479-01  
 Acumulados Nos. 2000-0428, 2001-0122, 2001-0343  
 Actor: GUSTAVO MOYA ÁNGEL Y OTROS  
 Acción Popular

metodología tarifaria para regular el cálculo de los costos de prestación de los servicios de acueducto y alcantarillado, la cual tendrá vigencia de cinco años.

Estas disposiciones no han sido objeto de modificación por la autoridad competente, luego se encuentran vigentes hasta tanto haya un pronunciamiento distinto por la autoridad competente.

**b. Tasa por utilización de aguas.**

Fue establecida en el Código de los Recursos Naturales y en el artículo 43 de la Ley 99 de 1993. "Tiene por objeto cobrar por la utilización de las aguas directamente captadas de un cuerpo de agua, con el fin de destinar dichos recursos al pago de los gastos de protección y renovación de los recursos hídricos (...) (Política Nacional para la gestión del Recurso Hídrico, para los fines establecidos en el artículo 108 de la Ley 1051 de 2007, modificada por el artículo 216 de la Ley 1450 de 2010).

Las citadas disposiciones señalan:

**Artículo 43°.-** Reglamentado por el Decreto Nacional 155 de 2004. Tasas por Utilización de Aguas. La utilización de aguas por personas naturales o jurídicas, públicas o privadas, dará lugar al cobro de tasas fijadas por el Gobierno Nacional que se destinarán al pago de los gastos de protección y renovación de los recursos hídricos, para los fines establecidos por el artículo 159 del Código Nacional de Recursos Naturales Renovables y de Protección al Medio Ambiente, Decreto 2811 de 1974. El Gobierno Nacional calculará y establecerá las tasas a que haya lugar por el uso de las aguas.  
 El sistema y método establecidos por el artículo precedente para la definición de los costos sobre cuya base se calcularán y fijarán las tasas retributivas y compensatorias, se aplicarán al procedimiento de fijación de la tasa de que trata el presente artículo.

El artículo 216 de la Ley 1450 de 2010, modificó parcialmente esta disposición en los siguientes términos:

Expediente No. 25000-23-27-000-2001-0479-01  
Acumulados Nos. 2000-0428, 2001-0122, 2001-0343  
Actor: GUSTAVO MOYA ÁNGEL Y OTROS  
Acción Popular

ARTÍCULO 216. TASAS POR UTILIZACIÓN DE AGUA.  
Adiciónese los siguientes parágrafos al artículo 43  
de la Ley 99 de 1993.

**"Parágrafo 1o.** Todo proyecto que requiera licencia ambiental y que involucre en su ejecución el uso del agua, tomada directamente de fuentes naturales, bien sea para consumo humano, recreación, riego o cualquier otra actividad, deberá destinar no menos del 1% del total de la inversión para la recuperación, preservación, conservación y vigilancia de la cuenca hidrográfica que alimenta la respectiva fuente hídrica. El beneficiario de la licencia ambiental deberá invertir estos recursos en las obras y acciones de recuperación, preservación y conservación de la respectiva cuenca hidrográfica, de acuerdo con la reglamentación vigente en la materia.

PARÁGRAFO 2o. Los recursos provenientes del recaudo de las tasas por utilización de agua, se destinarán de la siguiente manera:

a) En las cuencas con Plan de Ordenamiento y Manejo Adoptado, se destinarán exclusivamente a las actividades de protección, recuperación y monitoreo del recurso hídrico definidas en el mismo;

b) En las cuencas declaradas en ordenación, se destinarán a la elaboración del Plan de Ordenamiento y Manejo de la Cuenca;

c) En ausencia de las condiciones establecidas en los literales a) y b), se destinarán a actividades de protección y recuperación del recurso hídrico definidos en los instrumentos de planificación de la autoridad ambiental competente y teniendo en cuenta las directrices del Ministerio de Ambiente, Vivienda y Desarrollo Territorial, o quien haga sus veces.

Para cubrir gastos de implementación, monitoreo y seguimiento; la autoridad ambiental podrá utilizar hasta el diez por ciento (10%) de los recaudos.

Los recursos provenientes de la aplicación del parágrafo 1o del artículo 43 de la Ley 99 de 1993, se destinarán a la protección y recuperación del recurso hídrico, de conformidad con el respectivo Plan de Ordenamiento y Manejo de la Cuenca o en la formulación y adopción del Plan.

PARÁGRAFO 3o. La tasa por utilización de aguas se cobrará a todos los usuarios del recurso hídrico, excluyendo a los que utilizan el agua por ministerio

Expediente No. 25000-23-27-000-2001-0479-01  
Acumulados Nos. 2000-0428, 2001-0122, 2001-0343  
Actor: GUSTAVO MOYA ÁNGEL Y OTROS  
Acción Popular

de ley, pero incluyendo aquellos que no cuentan con la concesión de aguas, sin perjuicio de la imposición de las medidas preventivas y sancionatorias a que haya lugar y sin que implique bajo ninguna circunstancia su legalización".

Según se consigna en la Política de agua "las inversiones realizadas con los recaudos de la tasa por utilización de aguas, evidencia la participación de diferentes actividades dentro de las que, en orden de importancia, se encuentran: reforestación y restauración asociada a la conservación del recurso hídrico, el control de erosión, la adquisición y mantenimiento de predios para conservación del recurso hídrico y la formulación de planes de ordenación y manejo de cuencas hidrográficas, actividades éstas que concentran más del 90% del recaudo del instrumento económico (...)".

**Objetivo 6. Definición e implementación de instrumentos de valoración del daño ambiental**

En relación con este objeto, la Sala considera importante traer a colación el proyecto presentado en Francia por un grupo de trabajo dirigido por Laurent Neyret y Gilles J. Martín, con el cual se pretende superar el desorden relativo a la identificación y delimitación de los perjuicios ligados al daño ambiental. Ese grupo plantea una clasificación metódica de los diferentes perjuicios en caso de daño ambiental, según un ordenamiento racional teniendo en cuenta su naturaleza propia y operando por la vía de identificación, definición y clasificación en categorías y subcategorías jurídicas cuyo resultado, que se expone a continuación, fue publicado en Neyret Laurent y Martín Gilles J. "Nomenclature des prejudices environnementaux" L.G.D.J. Lextenso éditions, Paris 2012.

En dicha obra se señala que en materia de perjuicios ambientales existe un acuerdo más o menos generalizado que distingue entre los perjuicios que afectan al hombre y aquellos que afectan el ambiente como tal, así:

Expediente No. 25000-23-27-000-2001-0479-01  
Acumulados Nos. 2000-0428, 2001-0122, 2001-0343  
Actor: GUSTAVO MOYA ÁNGEL Y OTROS  
Acción Popular

## **1. Los perjuicios causados al ambiente.**

Por perjuicios causados al ambiente se entiende el conjunto de atentados contra un ecosistema en su composición, su estructura, y/o su funcionamiento. Estos perjuicios se manifiestan como un ataque a los elementos y/o a las funciones de los ecosistemas, independientemente de sus repercusiones en los intereses humanos.

El atentado es perjudicial cuando es calificado, según el caso, de mensurable, suficiente, cuantificable, significativo, notable, sustancial, no insignificante, grave o irreversible.

Los ecosistemas se entienden como complejos dinámicos formados por comunidades de plantas, animales y microorganismos y por su entorno no viviente que por su interacción forman unidades funcionales.

Los elementos del ambiente se entienden como diversos componentes de los ecosistemas, independientemente de la estructura o funcionamiento de estos últimos. Los elementos del ambiente pueden ser o no ser objeto de una protección jurídica específica.

Por funciones ecológicas se entienden las interacciones entre los elementos y los procesos biológicos y biofísicos que permiten el mantenimiento y funcionamiento de los ecosistemas.

### **1.1. Los atentados a los suelos y sus funciones.**

Por atentados contra los suelos y sus funciones, se entienden los ataques dirigidos a la textura o estructura física, química o biológica de los suelos, capaz de afectar su estado ecológico, sus cualidades y sus funciones ecológicas.

Expediente No. 25000-23-27-000-2001-0479-01  
Acumulados Nos. 2000-0428, 2001-0122, 2001-0343  
Actor: GUSTAVO MOYA ÁNGEL Y OTROS  
Acción Popular

Estos atentados pueden tomar la forma de una contaminación, de una erosión, de una disminución de la materia orgánica, un derrumbe, un deslizamiento, una salinización, una impermeabilización y compactación, o un empobrecimiento de la diversidad biológica de los suelos.

Por funciones ecológicas del suelo se entiende el papel que juegan en el seno de un ecosistema, como por ejemplo servir de hábitat a la biodiversidad, contribuir al almacenamiento, filtración y transformación de los elementos nutritivos, de las sustancias y del agua, a la recarga de las fuentes subterráneas, a la captura del carbono, o incluso a la regulación del clima.

#### **1.2. Los atentados contra el aire, la atmósfera y sus funciones.**

Por atentados contra el aire, la atmósfera y sus funciones, se entienden los ataques dirigidos a la calidad del aire o la atmósfera, capaces de afectar sus funciones ecológicas.

Estos atentados pueden tomar la forma de una modificación de la composición del aire o de la atmósfera.

Por funciones ecológicas del aire o de la atmósfera se entiende el papel que ellos juegan en el seno de los ecosistemas como por ejemplo: servir de soporte a la biodiversidad, absorber la radiación solar ultravioleta o participar en la regulación del clima.

#### **1.3. Los atentados contra el agua, los medios acuáticos y sus funciones.**

Por atentados contra el agua, los medios acuáticos y sus funciones se entienden los ataques dirigidos contra las aguas

Expediente No. 25000-23-27-000-2001-0479-01  
Acumulados Nos. 2000-0428, 2001-0122, 2001-0343  
Actor: GUSTAVO MOYA ÁNGEL Y OTROS  
Acción Popular

superficiales o subterráneas, territoriales o marinas, así como a los medios acuáticos como los cauces de agua, los lagos, los planos de agua y las zonas húmedas, capaces de afectar su estado y su potencial ecológico, sus cualidades y funciones ecológicas, así como su libre circulación.

Estos atentados pueden tomar la forma de perturbaciones hidrológicas, biológicas, térmicas, físicas o químicas.

Por funciones ecológicas de las aguas y los medios acuáticos, se entiende el papel que juegan dentro del ecosistema como por ejemplo: servir de soporte a la biodiversidad, contribuir a la sedimentación a la eliminación de elementos que polucionan, a la compensación de la insuficiencia de las precipitaciones pluviales o a la regulación del clima.

#### **1.4. Los atentados contra las especies y sus funciones.**

Por atentados contra las especies y sus funciones, se entienden los ataques dirigidos a las especies de fauna y flora, pertenezcan o no a la categoría de especie protegida, y a sus funciones ecológicas.

Estos atentados pueden manifestarse, según la especie, sub especie, la población, el individuo o sus hábitats y pueden tomar la forma de:

- La mutilación, la destrucción o la perturbación de los animales.
- La destrucción, el corte, la mutilación, la erradicación, la cosecha, o la extirpación de vegetales.
- La erradicación, el debilitamiento, la disminución o la dilución de una especie, sub especie, o población.
- La destrucción, la alteración y la degradación de un hábitat.

Expediente No. 25000-23-27-000-2001-0479-01  
Acumulados Nos. 2000-0428, 2001-0122, 2001-0343  
Actor: GUSTAVO MOYA ÁNGEL Y OTROS  
Acción Popular

Por funciones ecológicas de una especie se entiende el papel que ella juega o puede jugar dentro de un ecosistema, como por ejemplo, según las especies: la polinización de plantas, la dispersión de granos, el sostén de un hábitat o de una fuente de alimentación para otras especies, la captura del carbono, la regulación del clima y el mantenimiento de la diversidad biológica necesaria para la supervivencia de las poblaciones.

## **2. Los perjuicios causados al hombre.**

Por perjuicios causados al hombre se entiende el conjunto de perjuicios colectivos e individuales que resulten para un hombre de un daño ambiental o de la amenaza inminente de un daño ambiental.

### **2.1. Los perjuicios colectivos.**

Por perjuicios colectivos causados al hombre en caso de daño ambiental, se entienden los ataques que afectan intereses humanos superando la suma de intereses individuales y que afectan los beneficios colectivos derivados del ambiente o que deterioran la defensa del ambiente en sus diferentes aspectos.

#### **2.1.1. Los atentados a los servicios ecológicos**

Los atentados a los servicios ecológicos corresponden a una disminución del bienestar o los beneficios que los seres humanos obtienen de los elementos del ambiente o de sus funciones ecológicas, además e independientemente de la alteración de los beneficios individuales y claramente identificados.

Estos atentados pueden revestir diferentes formas según la naturaleza de los servicios afectados así:

##### **2.1.1.1. Los atentados a los servicios de regulación**

Expediente No. 25000-23-27-000-2001-0479-01  
Acumulados Nos. 2000-0428, 2001-0122, 2001-0343  
Actor: GUSTAVO MOYA ÁNGEL Y OTROS  
Acción Popular

Por ellos se entiende la alteración de la capacidad del ambiente para modular los fenómenos en un sentido favorable al hombre, como la polinización o la regulación del clima global o local, la regulación de la calidad del aire, de los flujos hídricos o aún de las enfermedades o los riesgos naturales.

#### **2.1.1.2. Los atentados a los servicios de aprovisionamiento.**

Por ellos se entiende la alteración de los servicios que el ambiente proporciona al hombre como los alimentos, los materiales y fibras, el agua dulce, las bioenergías o los productos bioquímicos y farmacéuticos.

#### **2.1.1.3. Los atentados a los servicios culturales**

Por ellos se entiende la disminución del bienestar colectivo de orden espiritual, recreativo, cultural, derivado de la civilización, estético, científico, proporcionado por el ambiente.

#### **2.1.2. Los atentados a la misión de protección del ambiente**

Por atentados a la misión de protección del ambiente se entienden los ataques dirigidos a los intereses colectivos defendidos por las personas, públicas o privadas, encargadas de la defensa del ambiente en sus diferentes aspectos.

Este perjuicio se puede caracterizar por la considerable disminución de los esfuerzos que han desarrollado esas personas para cumplir su misión, en presencia de un daño o una amenaza inminente de daño ambiental.

Expediente No. 25000-23-27-000-2001-0479-01  
Acumulados Nos. 2000-0428, 2001-0122, 2001-0343  
Actor: GUSTAVO MOYA ÁNGEL Y OTROS  
Acción Popular

## **2.2. Los perjuicios individuales**

Los perjuicios individuales causados al hombre en caso de daño ambiental, en el entendido de atentados dirigidos a los intereses propiamente individuales, de orden económico o moral, que afecten víctimas individualizadas y determinadas.

### **2.2.1. Los perjuicios económicos resultantes de un daño ambiental**

Los perjuicios económicos resultantes de un daño ambiental reagrupan el conjunto de atentados contra los intereses individuales de orden patrimonial que pueden dividirse en tres categorías: los costos causados y por venir resultantes de los perjuicios causados al ambiente, los atentados contra los bienes, así como las pérdidas en el beneficio o utilidad esperados.

#### **2.2.1.1. Los costos causados y por venir resultantes de los perjuicios causados al ambiente**

Por costos causados y por venir resultantes de los perjuicios causados al ambiente, se entienden los gastos razonables en que se ha incurrido o puede incurrirse en caso de daños perjudiciales causados a los ecosistemas.

Estos costos pueden presentarse en las siguientes formas:

##### **3.2.1.1.1. Los costos de las medidas de prevención**

Estos costos están destinados a evitar o reducir la realización de una amenaza inminente de daño ambiental.

Expediente No. 25000-23-27-000-2001-0479-01  
Acumulados Nos. 2000-0428, 2001-0122, 2001-0343  
Actor: GUSTAVO MOYA ÁNGEL Y OTROS  
Acción Popular

#### **3.2.1.1.2. Los costos de las medidas de limitación**

Los costos de las medidas de limitación corresponden a aquellos en que se incurre en caso de daño ambiental a fin de poner término a sus causas o limitar la agravación, por ejemplo los costos de descontaminación, de salvación de la fauna, de limpieza de los sitios y aún los gastos de funcionamiento de los centros de atención de la fauna.

#### **3.2.1.1.3. Los costos de las medidas de reparación**

Por costos de las medidas de reparación se entienden aquellos realizados o por realizar destinados a reparar los perjuicios causados al ambiente y engloban:

- Los costos de las medidas primarias destinadas a restablecer los elementos naturales, sus funciones y servicios ecológicos a su estado inicial.

- Los costos de las medidas complementarias destinadas a compensar la falta de restauración completa de los elementos naturales, sus funciones y servicios ecológicos.

- Los costos de las medidas de compensación destinadas a compensar las pérdidas provisionales de los elementos naturales, sus funciones y servicios ecológicos.

#### **3.2.1.1.4. Los costos de las medidas de comunicación**

Los costos de las medidas de comunicación están destinados a restaurar la imagen de marca o la reputación de una persona, relacionados con la calidad ambiental de un territorio, una actividad o un producto.

Expediente No. 25000-23-27-000-2001-0479-01  
Acumulados Nos. 2000-0428, 2001-0122, 2001-0343  
Actor: GUSTAVO MOYA ÁNGEL Y OTROS  
Acción Popular

#### **3.2.1.1.5. Los costos adicionales**

Por costos adicionales se entienden todos los costos necesarios para desarrollar las medidas de prevención, de limitación, de reparación o de seguimiento del daño ambiental tales como:

Los gastos administrativos ligados con la evaluación de los daños y de las amenazas inminentes de daño ambiental, la decisión, la puesta en marcha, el control y seguimiento de las medidas de prevención, de limitación y de reparación.

Los gastos de los expertos y sus estudios.

Los gastos pre-contenciosos y contenciosos ligados al desarrollo de las medidas de prevención, de limitación, de reparación o de seguimiento del daño ambiental. Pueden también incluirse en esta categoría los honorarios de los abogados que la víctima haya contratado para asegurar la defensa de sus derechos.

Los gastos de consulta pública e información relacionada con la cobertura del daño o la amenaza inminente de daño ambiental, así como de las medidas adoptadas para poner en marcha las medidas de prevención, de limitación, de reparación y de seguimiento.

#### **2.2.1.2. Los atentados contra los bienes**

Por atentados contra los bienes causados por un daño ambiental se entienden los relacionados con el valor venal o el valor de uso de un bien objeto de un derecho privado, destruido o deteriorado como consecuencia de un daño ambiental.

Expediente No. 25000-23-27-000-2001-0479-01  
Acumulados Nos. 2000-0428, 2001-0122, 2001-0343  
Actor: GUSTAVO MOYA ÁNGEL Y OTROS  
Acción Popular

#### **2.2.1.3. Las pérdidas en el beneficio o la ganancia esperada**

Las pérdidas en el beneficio o la ganancia esperada resultantes de un daño ambiental deben ser tenidas en cuenta. Estas son aquellas que resultan de la interdicción del ejercicio de una actividad comercial. Ellas pueden referirse a la pérdida de mercados o la reducción de una ganancia, la disminución en las cifras de los negocios.

#### **2.2.2. Los perjuicios morales resultantes de un daño ambiental**

Por perjuicios morales resultantes del daño ambiental se entienden los atentados a los intereses extrapatrimoniales de orden individual que pueden presentarse en dos formas:

##### **2.2.2.1. El atentado contra la imagen de marca o la reputación**

La degradación de la imagen de marca o de la reputación de una persona relacionada con la calidad del ambiente de un territorio, una actividad o un producto debe tomarse en cuenta.

##### **2.2.2.2. El perjuicio al usufructo o disfrute de los bienes**

Por perjuicio al usufructo o disfrute de los bienes se entiende el atentado que conduce a una persona a vivir o ejercer su actividad en condiciones ambientales degradadas en comparación con la situación anterior al daño.

Este perjuicio se relaciona especialmente con la vida en general o puede ser individual.

Expediente No. 25000-23-27-000-2001-0479-01  
 Acumulados Nos. 2000-0428, 2001-0122, 2001-0343  
 Actor: GUSTAVO MOYA ÁNGEL Y OTROS  
 Acción Popular

### **2.2.3. Los perjuicios corporales resultantes de un daño ambiental**

Son los perjuicios indemnizables en caso de daño corporal resultante de un daño ambiental que se relacionan con los perjuicios patrimoniales y extrapatrimoniales contenidos en la nomenclatura Dintilhac<sup>170</sup> así:

#### **2.2.3.1. - Lesiones de la víctima directa**

##### **2.2.3.1.1. Los perjuicios patrimoniales temporales (antes de consolidación):**

###### **a) Gastos de salud actuales (DSA)**

- Gastos Varios (FD)
- Lucro cesante profesional actual (PWPA)

###### **b) Perjuicios patrimoniales permanentes (después de consolidación)**

- Los gastos de salud futuro (DSF)
- Gastos de adaptación de la vivienda (FLA)
- Gastos de adaptación del vehículo (FVA)
- Asistencia de tercera persona (ATP)
- Pérdida de ingresos profesionales en el futuro (PGPF)
- Impacto profesional (IP)
- Perjuicio de escolar, Universitario o de formación (PSU)

##### **2.2.3.1.2. Daños extrapatrimoniales**

###### **a) Daños extrapatrimoniales temporales (antes de consolidación):**

- Déficit funcional temporal (FTD)

---

<sup>170</sup>La nomenclature Dintilhac <http://www.justice.gouv.fr/publications-10047/rapports-thematiques-10049/elaboration-dune-nomenclature-des-prejudices-corporels-11945.html>

Expediente No. 25000-23-27-000-2001-0479-01  
 Acumulados Nos. 2000-0428, 2001-0122, 2001-0343  
 Actor: GUSTAVO MOYA ÁNGEL Y OTROS  
 Acción Popular

- Los sufrimientos padecidos (SE)
- Perjuicio estético temporal (PET)

**b) Daños extrapatrimoniales permanentes (después de consolidación)**

- Déficit funcional permanente (DFP)
- Pérdida de comodidades (PA)
- Perjuicio estético o desfiguración permanente (PEP)
- Perjuicio sexual (PS)
- Perjuicio de establecimiento (PE)
- Daño permanente excepcional (EPP)

**c) Daños extrapatrimoniales evolutivos (excluyendo la consolidación):**

- Daños relacionados con patologías evolutivas (EPI)

**2.2.3.2. - Lesiones corporales a las víctimas indirectas**

**2.2.3.2.1. Daños a las víctimas indirectas en caso de fallecimiento de la víctima directa**

**a) Perjuicios patrimoniales**

- Gastos funerarios (FO)
- Pérdida de ingresos de los miembros de la familia (PR)
- Gastos diversos de los familiares (FD)

**b) Perjuicios extrapatrimoniales**

- Perjuicios por acompañamiento (PAC)
- Perjuicio de afecto (PAF)

**2.2.3.2.2. Daños a las víctimas indirectas en caso de supervivencia de la víctima directa**

**a) Perjuicios patrimoniales**

Expediente No. 25000-23-27-000-2001-0479-01  
 Acumulados Nos. 2000-0428, 2001-0122, 2001-0343  
 Actor: GUSTAVO MOYA ÁNGEL Y OTROS  
 Acción Popular

- Pérdida de ingresos de los miembros de la familia (PR)
- Gastos varios de los familiares (FD)

b) Perjuicios extrapatrimoniales

- Perjuicio de afecto (PAF)
- Perjuicios extrapatrimoniales excepcionales

Desde la perspectiva ecológica<sup>171</sup>, el mérito del anterior listado de perjuicios causados por un daño ecológico es el de distinguir, de una parte las nociones de procesos y funciones de los ecosistemas y de otra parte la de servicios o bienes y servicios que los sistemas naturales y culturales proporcionan a los humanos. Esta distinción entre funciones y servicios permite la articulación de las ciencias naturales, con las ciencias sociales y el derecho, que se relacionan con los ecosistemas y el ambiente. Esta contribución presenta un léxico ecológico de 22 términos de ecología funcional y de ecología económica, -una nueva escuela de las ciencias económicas,- para uso de los lectores de esta nomenclatura, al igual que un esquema para distinguir claramente entre funciones y servicios de los ecosistemas y ponerlos en relación con los procesos, de un lado, y con los beneficios y valores de los servicios, de otro lado.

No obstante, si bien es importante en cada disciplina nombrar las cosas con las palabras apropiadas a su naturaleza, es aún más importante encontrar un lenguaje común que permita que las diferentes disciplinas y culturas trabajen en conjunto. Cada vez con mayor frecuencia los daños sufridos por el ambiente y más concretamente por los ecosistemas y causados por la acción humana, se abordan con un análisis multi-criterios, esto es, con una mirada a la vez económica, social

---

<sup>171</sup> Aronson James, "Regard d'un écologue sur la proposition de Nomenclature des préjudices environnementaux", en Neyret Laurent y Martín Gilles J. "Nomenclature des prejudices environnementaux" L.G.D.J. Lextenso éditions, Paris 2012.

Expediente No. 25000-23-27-000-2001-0479-01  
Acumulados Nos. 2000-0428, 2001-0122, 2001-0343  
Actor: GUSTAVO MOYA ÁNGEL Y OTROS  
Acción Popular

y ecológica. Sin embargo, son los aspectos ecológicos los que representan la base *sine qua non* de nuestras sociedades y de nuestra economía en el planeta tierra.

Por lo anterior se ha de buscar una manera de ilustrar la dinámica de la estructura y el funcionamiento de los ecosistemas involucrados, así como la diferencia entre las funciones y servicios prestados a los humanos por los ecosistemas.

Por otra parte, según los economistas Julien Hay, Harold Levrel, Adeline Bas y Pascal Gastineau<sup>172</sup>, si bien es difícil identificar un listado económico de perjuicios ligados al daño ambiental, el análisis económico si proporciona una serie de conceptos complementarios que son útiles en el momento de establecer una tipología en materia de atentados al ambiente.

En primer lugar la degradación del ambiente representa un costo social que puede ser descompuesto en diversos elementos a menudo ligados entre ellos. En segundo lugar la economía proporciona el sistema de análisis stock/flux del funcionamiento de un ecosistema. Finalmente, los economistas distinguen las consecuencias de los atentados al ambiente según sea posible o no atribuirles un valor monetario directamente o a partir de precios de mercado.

La economía propone entonces un conjunto de criterios y conceptos que permiten ordenar los efectos de un daño ambiental en categorías bien distintas así: (i) los costos de atenuación, los costos residuales y los costos de transacción; (ii) el capital natural, los servicios y funciones ecológicas; (iii) la forma de estimar en términos

---

<sup>172</sup> Hay Julien, Levrel Harold, Bas Adeline y Gastineau Pascal, C, en Neyret Laurent y Martín Gilles J. "Regard d'économistes sur la proposition de Nomenclature des prejudices environnementaux" en Neyret Laurent y Martín Gilles J. "Nomenclature des prejudices environnementaux" L.G.D.J. Lextenso éditions, Paris 2012.

Expediente No. 25000-23-27-000-2001-0479-01  
Acumulados Nos. 2000-0428, 2001-0122, 2001-0343  
Actor: GUSTAVO MOYA ÁNGEL Y OTROS  
Acción Popular

monetarios el alcance de los perjuicios causados, (iv) la forma de estimar los perjuicios que no pueden evaluarse conforme a precios de mercado teniendo en cuenta los valores instrumentales e intrínsecos del ambiente, los métodos de evaluación de los perjuicios y la diferencia entre perjuicios que pueden y no pueden ser estimados en términos monetarios.

**(i) Los costos de atenuación, los costos residuales y los costos de transacción**

Los atentados al ambiente producen un conjunto de consecuencias negativas que constituyen un costo social, en tanto deben ser asumidos por la colectividad una vez se ha producido la alteración ambiental.

Entre los elementos constitutivos del costo social es posible distinguir los costos de atenuación unidos a los costos residuales y los costos de transacción.

Los costos de atenuación representan el conjunto de medios humanos y materiales que deben emplearse cuando se presenta un atentado al ambiente o en caso de que este sea inminente, con miras a limitar en lo posible las consecuencias negativas del atentado. Desde la perspectiva económica el empleo de esos medios constituye un costo social porque esos recursos no pueden dedicarse a los usos a que estarían destinados si la degradación ambiental no se hubiese presentado. Los costos residuales por su parte corresponden al conjunto de perjuicios derivados del atentado que no han podido ser evitados pese a la adopción de medidas de atenuación.

Estos costos están vinculados en cuanto existe una relación negativa entre la importancia y alcance de las medidas de atenuación y la dimensión de los costos residuales. El arte de una buena gestión post atentado consiste en optar por una combinación costos de atenuación /costos residuales que mantenga el costo social en un nivel razonable.

Expediente No. 25000-23-27-000-2001-0479-01  
 Acumulados Nos. 2000-0428, 2001-0122, 2001-0343  
 Actor: GUSTAVO MOYA ÁNGEL Y OTROS  
 Acción Popular

Los costos de transacción hacen referencia, de manera general al conjunto de costos financieros o no ligados a la coordinación de los individuos (sea que esa coordinación pase o no por el mercado). En el cuadro de un procedimiento de indemnización, los costos de transacción incorporan elementos diversos tales como los gastos de la representación de las partes en el proceso, los gastos de recolectar la información y realizar la investigación necesaria para obtener las pruebas y los costos que asumen las instituciones judiciales entre otros.

En la práctica los costos de transacción suelen ser de tal envergadura que disuaden a las víctimas de iniciar un proceso judicial de indemnización. En particular la posibilidad de que se reembolsen a las partes civiles los gastos asumidos dentro de un proceso judicial permite garantizar que el conjunto de perjuicios será debidamente compensado y cargado al responsable del daño ambiental.

#### **(ii) Capital ambiental servicios y funciones ecológicas**

Es posible distinguir entre los bienes y servicios proporcionados por los ecosistemas, aquellos que benefician o no a los seres humanos. En el primer caso se trata de servicios ecológicos, es decir, los beneficios recibidos por el hombre de los procesos biológicos. En el segundo caso, se habla de funciones ecológicas para designar los procesos biológicos de funcionamiento y mantenimiento de los sistemas. Una tipología de servicios ecológicos de ha ido decantando poco a poco distinguiendo cuatro grandes categorías funcionales: apoyo, regulación, producción y culturales que los economistas, autores del documento "Regardd economistes sur la proposition de Nomenclature des préjudicesenvironnementaux", han adaptado de "MilleniumEcosystemAssessment, 2003" resumiéndolo en el siguiente cuadro:

Expediente No. 25000-23-27-000-2001-0479-01  
Acumulados Nos. 2000-0428, 2001-0122, 2001-0343  
Actor: GUSTAVO MOYA ÁNGEL Y OTROS  
Acción Popular

|                                                                                                                                              |                                                                                                                                                                                                                                                               |                                                                                                                                   |
|----------------------------------------------------------------------------------------------------------------------------------------------|---------------------------------------------------------------------------------------------------------------------------------------------------------------------------------------------------------------------------------------------------------------|-----------------------------------------------------------------------------------------------------------------------------------|
| Servicios de apoyo<br>o soporte de los<br>ecosistemas                                                                                        | Servicios de<br>regulación.<br>Beneficios de los<br>procesos de los<br>ecosistemas                                                                                                                                                                            | Servicios<br>culturales.<br>Beneficios<br>inmateriales de<br>los ecosistemas                                                      |
| Nutrición<br>Recursos genéticos<br>Productos<br>bioquímicos y<br>farmacéuticos<br>Agua...                                                    | Regulación del clima<br>Regulación de la<br>calidad del aire<br>Regulación de la<br>erosión<br>Regulación de las<br>aguas<br>Regulación de las<br>enfermedades<br>Regulación de los<br>parásitos<br>Polinización<br>Regulación de los<br>riesgos naturales... | Valores<br>espirituales y<br>religiosos<br>Valores estéticos<br>Recreación y<br>ecoturismo<br>Inspiración<br>Herencia cultural... |
| Servicios de producción Servicios necesarios para la<br>producción del conjunto de los otros servicios proporcionados<br>por los ecosistemas |                                                                                                                                                                                                                                                               |                                                                                                                                   |
| Ciclo del agua<br>Conservación de la biodiversidad<br>Ciclo de la materia<br>Producción primaria<br>Formación de suelos...                   |                                                                                                                                                                                                                                                               |                                                                                                                                   |

En el reporte número 4 de 2012<sup>173</sup> sobre el agua también se hace referencia a los servicios de los ecosistemas según “Millenium Ecosystem Assessment, 2003” y los clasifica así:

<sup>173</sup> “Managing Water under Uncertainty and Risk” The United Nations World Water Development Report 4. Published in 2012 by the United Nations Educational, Scientific and Cultural Organization.

Expediente No. 25000-23-27-000-2001-0479-01  
Acumulados Nos. 2000-0428, 2001-0122, 2001-0343  
Actor: GUSTAVO MOYA ÁNGEL Y OTROS  
Acción Popular

**Servicios de soporte** son los necesarios para la producción de todos los demás servicios del ecosistema, incluyendo formación de suelos, fotosíntesis, producción primaria, ciclo de nutrientes y ciclo del agua.

**Servicios de aprovisionamiento** son los productos obtenidos de los ecosistemas, incluyendo alimentos, fibras, petróleo, recursos genéticos, bioquímicos, medicinas naturales, productos farmacéuticos, recursos ornamentales y agua fresca.

**Servicios de regulación** son los beneficios obtenidos de la regulación de los procesos de los ecosistemas, incluyendo la regulación de la calidad del aire, la regulación del clima, la regulación del agua, la regulación de la erosión, la purificación del agua, la regulación de enfermedades y pestes, la polinización y la regulación natural incierta incluyendo los extremos de disponibilidad de agua.

**Servicios culturales** son los beneficios no materiales que las personas obtienen de los ecosistemas a través del enriquecimiento espiritual, desarrollo cognitivo, reflexión, recreación, y experiencias estéticas, tomando en cuenta el valor de los paisajes tanto terrestres como acuáticos.

El agua es entonces, según este reporte, multidimensional en el contexto de los servicios de los ecosistemas. Su disponibilidad y calidad se deriva de los servicios que proporcionan los ecosistemas. Pero el agua también es determinante de la forma como los ecosistemas pueden funcionar y es por tanto la fuente de todos los servicios que prestan los ecosistemas. Esto le otorga al agua una importancia primordial en el manejo de los ecosistemas como proveedores de servicios a los seres humanos.

Expediente No. 25000-23-27-000-2001-0479-01  
 Acumulados Nos. 2000-0428, 2001-0122, 2001-0343  
 Actor: GUSTAVO MOYA ÁNGEL Y OTROS  
 Acción Popular

Como lo indican JulienHay, Harold Levrel, Adeline Bas y PascalGastineau<sup>174</sup>, la alteración de un ecosistema se traduce en una baja del flujo de funciones y servicios ecológicos proporcionados por aquel. Esta disminución es más o menos durable e importante según el tipo de polución y las características del sistema afectado. El costo social del atentado al ambiente corresponde a la suma de los costos de las medidas de atenuación y el valor de las funciones y servicios ecológicos perdidos.

**(iii) La forma de estimar en términos monetarios el alcance de los perjuicios causados**

La economía diferencia los perjuicios en aquellos de mercado y los que no lo son según la posibilidad de establecer en términos monetarios el alcance de los perjuicios causados.

Un perjuicio será de mercado cuando es posible evaluarlo conforme a los precios de mercado o los registros contables y asignarle así un valor monetario. En la práctica esta clase de perjuicios agrupa el conjunto de perjuicios que tienen una incidencia financiera sobre los individuos, las empresas o las colectividades. La naturaleza de ese impacto negativo es variable. Puede proceder de los costos de las medidas de atenuación o del costo de la reparación de los bienes, entre otros. Puede igualmente derivarse de las pérdidas de ganancias asociadas especialmente a las pérdidas en los servicios ecológicos (impacto sobre los recursos naturales objeto de una explotación comercial).

A la inversa, un perjuicio es calificado como no de mercado, cuando no puede ser estimado en términos monetarios directamente a partir de precios de mercado.

---

<sup>174</sup> Hay Julien, Levrel Harold, Bas Adeline y Gastineau Pascal, C, en Neyret Laurent y Martín Gilles J. "Regard d'économistes sur la proposition de Nomenclature des prejudices environnementaux" en Neyret Laurent y Martín Gilles J. "Nomenclature des prejudices environnementaux" L.G.D.J. Lextenso éditions, Paris 2012.

Expediente No. 25000-23-27-000-2001-0479-01  
Acumulados Nos. 2000-0428, 2001-0122, 2001-0343  
Actor: GUSTAVO MOYA ÁNGEL Y OTROS  
Acción Popular

**(iv) la forma de estimar los perjuicios que no pueden evaluarse conforme a precios de mercado**

La evaluación monetaria de los perjuicios derivados del daño ambiental supone diferentes dificultades. La primera consiste en atribuir un valor monetario a los perjuicios que no son de mercado. Tal es el caso por ejemplo de las funciones ecológicas y de gran parte de los servicios ecológicos perdidos como consecuencia de un daño ambiental. No obstante, la economía ha diseñado diferentes métodos para superar esa dificultad, entre ellos el valor instrumental e intrínseco del ambiente.

El valor del ambiente hace referencia, de manera general, al vínculo que experimentan los individuos solos o en forma colectiva en relación con los diferentes atributos de la naturaleza. Las fuentes de ese vínculo son múltiples, según las nociones de valor instrumental y valor intrínseco que se han desarrollado.

Los individuos pueden experimentar un vínculo con el ambiente en razón de los beneficios directos o indirectos que obtienen de él. En este sentido ellos pueden estar deseosos de que la calidad del ambiente sea preservada para continuar obteniendo utilidades de los diferentes servicios ecológicos. Esto es lo que se ha llamado valor instrumental: el ambiente posee desde esta perspectiva un valor en la medida que constituye un medio necesario para obtener otros fines. No obstante, el vínculo del hombre con la naturaleza no está fundado exclusivamente en razones utilitaristas y antropocéntricas. Para un gran número de personas el ambiente es considerado como un fin en sí mismo, independientemente de su uso o utilidad, y se debe en consecuencia reconocer un valor sobre esta base. Esta noción de valor intrínseco se deriva esencialmente de los órdenes ético, religioso, filosófico o espiritual, con los cuales el análisis económico no se

Expediente No. 25000-23-27-000-2001-0479-01  
Acumulados Nos. 2000-0428, 2001-0122, 2001-0343  
Actor: GUSTAVO MOYA ÁNGEL Y OTROS  
Acción Popular

articula espontáneamente, especialmente porque este último se orienta más hacia una aproximación utilitarista.

La distinción valor instrumental/valor intrínseco se engloba en la noción de valor económico total del ambiente que distingue los valores de uso y de no uso como se observa en el siguiente cuadro tomado del artículo "Regardd'economistes sur la proposition de Nomenclature des prejudicesenvironnementaux", que la Sala ha venido presentando:

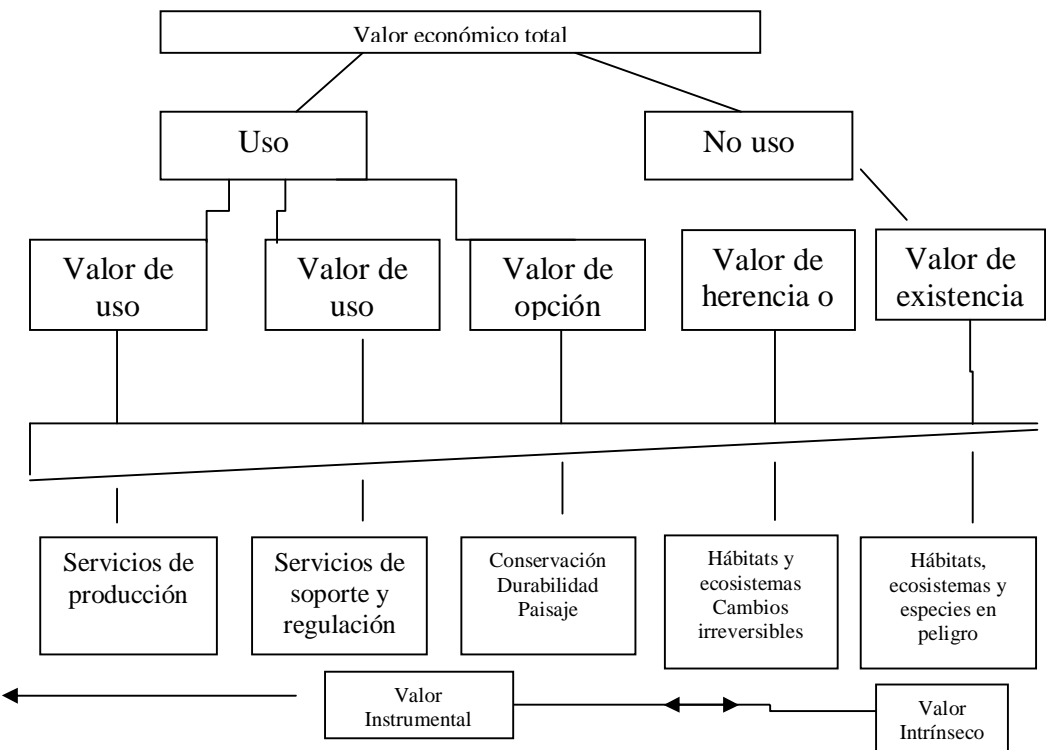

Los valores de uso corresponden a las ventajas que los individuos pueden obtener, directa o indirectamente, del uso de un recurso ambiental. Esos usos pueden ser actuales o futuros (se habla en este caso de valor de opción), extractivos (caza) o no extractivos (observación de pájaros). Si los valores de uso hacen referencia principalmente al ambiente como fuente de servicios materiales e inmateriales, para los hombres los valores de no uso hacen referencia a consideraciones menos antropocéntricas, especialmente éticas religiosas o altruistas. Existe principalmente un compromiso de legar un ambiente sano a las generaciones futuras o de

Expediente No. 25000-23-27-000-2001-0479-01  
Acumulados Nos. 2000-0428, 2001-0122, 2001-0343  
Actor: GUSTAVO MOYA ÁNGEL Y OTROS  
Acción Popular

reconocimiento del derecho a existir de los diferentes elementos constitutivos del ambiente.

En cuanto a la valoración de los perjuicios producidos por una daño al ambiente, los mismos economistas que la Sala ha venido presentando, consideran que se trata de un asunto espinoso, donde generalmente solo una parte de los servicios o funciones ecológicas, perdidos como resultado de un atentado al ambiente, pueden ser directamente estimados por medio de precios observables en el mercado. En realidad, una gran parte de los efectos de una degradación ambiental no puede ser cuantificada con base en los datos contables o de mercado.

En estos casos pueden utilizarse de manera complementaria métodos desarrollados por la economía y otras ciencias sociales y constituir un elemento de información que puede tenerse en cuenta en una valoración multi-criterio de servicios y funciones ecológicas perdidos como consecuencia de un atentado contra el ambiente.

En todo caso, señalan los citados economistas, la existencia de estos métodos no debe hacer perder de vista que la estimación de las funciones y servicios ecológicos está sujeta a cierta incertidumbre, y que este hecho no es suficiente *per se* para negarse a hacer la evaluación, ya que esos métodos pueden aportar indicadores útiles que permitan balancear las reparaciones y los perjuicios causados. Entre los métodos que se mencionan están:

Los métodos desarrollados por los economistas, buscan explicitar lo que las personas estarían dispuestas a dar o recibir para beneficiarse de un mejoramiento del ambiente o para evitar una degradación del mismo. Estos métodos son los más frecuentemente aplicados para producir estimaciones monetarias de los perjuicios causados al ambiente. Sin embargo, estos métodos, derivados de un corpus teórico

Expediente No. 25000-23-27-000-2001-0479-01  
Acumulados Nos. 2000-0428, 2001-0122, 2001-0343  
Actor: GUSTAVO MOYA ÁNGEL Y OTROS  
Acción Popular

utilitarista, han sido adaptados para establecer valores antropocéntricos y por tanto tienen límites en lo que concierne a otro tipo de valores (cívicos, biofísicos etc.). En consecuencia, estos métodos requieren que las personas tomadas en cuenta en la evaluación tengan una comprensión amplia de la manera como los servicios ecológicos a valorizar contribuyen a su bienestar, lo cual es muy probable quizá respecto de ciertos servicios ecológicos, como los de producción o culturales. Por el contrario estos métodos se revelan poco eficientes para evaluar los servicios que benefician de manera indirecta a los individuos, como los servicios de soporte o regulación.

Los métodos socio-psicológicos a su vez permiten identificar, caracterizar y medir los valores o las preferencias experimentadas por los individuos en relación con una modificación del ambiente o sus consecuencias personales o colectivas. Estos métodos pueden apoyarse en encuestas con grandes muestras, encaminadas a obtener resultados cuantitativos. Estos métodos no permiten obtener estimaciones monetarias, como los métodos económicos, pero constituyen un medio para conocer las actitudes, preferencias, criterios de juicio, percepciones, creencias, conocimiento e intenciones de los individuos o del público en materia ambiental. La dificultad de estos métodos radica en la imposibilidad de traducir los resultados en términos monetarios.

Los métodos cívicos buscan apreciar los valores en materia ambiental a partir de las escogencias de los individuos en su papel de ciudadanos.

Finalmente, dado que los atentados al ambiente afectan esencialmente elementos de los que los individuos no reportan un beneficio directo o indirecto, como es el caso de las funciones ecológicas, la evaluación del perjuicio puede apoyarse en aproximaciones fundadas sobre equivalencias biofísicas más que sobre equivalencias de valor sea monetario

Expediente No. 25000-23-27-000-2001-0479-01  
Acumulados Nos. 2000-0428, 2001-0122, 2001-0343  
Actor: GUSTAVO MOYA ÁNGEL Y OTROS  
Acción Popular

o no. En este sentido, el método recurre al análisis de equivalencia de hábitats que busca cuantificar en una métrica biofísica, los servicios y funciones ecológicas perdido por una degradación del ambiente para poder elaborar y cuantificar el costo de las acciones positivas para el ambiente que han de desarrollarse para restablecer un monto de funciones y servicios equivalente a aquellos que se perdieron.

En cuanto a la evaluación de los perjuicios futuros, el asunto del tiempo debe tomarse en cuenta. Los efectos negativos de un deterioro ambiental pueden perdurar por un lapso más o menos amplio, cuando no son irreversibles (extinción de una especie por ejemplo). Por otra parte, algunos de los efectos de una polución pueden haberse dejado de lado o incluso no haber sido observados y conocidos más que parcialmente al momento de establecer una indemnización.

En economía la cuestión del tiempo se aborda a través de la actualización, esto es la determinación del valor presente, considerando la preferencia por el presente de los agentes económicos, o dicho de otro modo, el hecho de que ellos prefieren obtener los beneficios económicos de una acción en forma instantánea, más que en el futuro, o a la inversa prefieren pagar en el futuro el costo de una acción que hacerlo de manera inmediata.

La dimensión temporal de los atentados contra el ambiente conduce igualmente a considerar el tema de la incertidumbre. Es difícil, en el estado actual de los conocimientos científicos, apreciar con precisión la naturaleza, amplitud y duración de los perjuicios ambientales derivados de un atentado contra el ambiente.

Desde la perspectiva de la indemnización la incertidumbre plantea el problema de la justicia de la reparación acordada como compensación de un atentado al ambiente, una

Expediente No. 25000-23-27-000-2001-0479-01  
Acumulados Nos. 2000-0428, 2001-0122, 2001-0343  
Actor: GUSTAVO MOYA ÁNGEL Y OTROS  
Acción Popular

preocupación legítima que se acopla difícilmente con la realidad y complejidad de los atentados al ambiente.

En la práctica hay al menos dos maneras de enfrentarse a esta dificultad. Una de ellas se ha aplicado en el caso de contaminaciones petroleras en Europa, donde es posible acordar las indemnizaciones de las víctimas año tras año, si el caso lo requiere, a medida que los daños se comprueban. En otros regímenes como los Estados Unidos, en materia de polución petrolera, la incertidumbre se aborda a partir de un aumento en las compensaciones, aumento destinado a ser provisionado como una prima de seguro para las partes civiles ante la eventualidad de una compensación insuficiente.

La primera solución pone en desventaja a las víctimas en razón de la demora de los procedimientos, la perseverancia y los esfuerzos que demanda para obtener una reparación justa al tiempo que protege a la parte responsable de pagar una reparación que exceda los daños causados. La segunda por su parte protege a las víctimas y las pone a cubierto de una indemnización insuficiente, pero por otro lado aumenta el riesgo de los responsables de pagar una indemnización excesiva.

Como puede observarse, señalan los economistas cuyo trabajo se presenta, la referencia a las nociones de funciones y servicios ecológicos ofrece perspectivas interesantes en términos de aplicación de la nomenclatura. Los servicios ecológicos constituyen hoy en día un tema de investigación importante, tanto en la ecología como en la economía. Los trabajos realizados permiten a los sujetos que deben participar en un proceso de reparación de perjuicios:

- La identificación de las funciones y servicios ecológicos y su cuantificación con la ayuda de indicadores.

Expediente No. 25000-23-27-000-2001-0479-01  
Acumulados Nos. 2000-0428, 2001-0122, 2001-0343  
Actor: GUSTAVO MOYA ÁNGEL Y OTROS  
Acción Popular

- La realización de tipologías de los medios, permitiendo aprehender las funciones y servicios de un tipo de medio.
- El análisis de las equivalencias entre diferentes servicios y su restauración.
- La evaluación monetaria de los servicios ecológicos y la constitución de valores de referencia.

Advierten sin embargo, que los jueces deben estar atentos para evitar que una misma pérdida de funciones ecológicas de lugar a la presentación de diversas demandas cuya indemnización conduciría a pagar dos veces por el mismo atentado bajo formas diferentes.

Cuando se trata del medio ambiente, es mejor saber valorar que tener capacidad de reparar, pues lo primero condiciona profundamente lo segundo y más aún, el medio ambiente es realmente "irreparable". Al efecto, es oportuno traer a colación el trabajo realizado por el Programa de Derecho Ambiental de la Oficina Regional del PNUMA para América Latina y el Caribe<sup>175</sup>, por exponer claros parámetros sobre el tema en estudio.

La valoración del daño ambiental es un asunto muy complejo y se afirma, en el documento consultado, que no existe hasta ahora un sistema jurídico en el que se haya establecido un mecanismo de valoración económica capaz de hacer frente a la complejidad del daño ambiental. Es por ello precisamente que en el ámbito de la justicia, el Juez se encuentra con problemas en ocasiones insalvables al momento de cuantificar el daño ambiental: falta de normativa que lo oriente, de metodología que pueda aplicar, falta de criterios valorativos propios, entre otros.

---

<sup>175</sup> Manuel Castañón del Valle, PNUMA, 2006. Documento No. XV.

Expediente No. 25000-23-27-000-2001-0479-01  
Acumulados Nos. 2000-0428, 2001-0122, 2001-0343  
Actor: GUSTAVO MOYA ÁNGEL Y OTROS  
Acción Popular

Agrega que en tanto la justicia no contemple la indemnización por la pérdida de la función ecológica de los bienes ambientales, cualquier valoración del daño ambiental será insuficiente.

Las decisiones judiciales a favor de la restauración del daño ambiental y las relativas a la compensación e indemnización necesitan imperativamente de una atribución de valor al "ambiente y sus componentes" cuando éstos resulten afectados.

En primer lugar, se debe tener en cuenta que el daño ambiental es un instituto que no es coherente con el concepto tradicional de daño, según es concebido por otras ramas del derecho.

El daño ambiental es por lo general permanente e irremediable y es por ello de la mayor importancia legislar al respecto, promoviendo su prevención y la definición de las normas/estándares pertinentes, para de esta manera, cuando ellos no vengán aplicados, utilizar los institutos de la responsabilidad y la compensación.

#### **- Determinación de la reparación del daño ambiental**

Para efectos de visualizar los criterios existentes en el marco de diversas legislaciones en materia de valoración del daño ambiental, es preciso señalar que existen dos sistemas para efectos de su reparación:

- El Sistema Subjetivo, donde el causante del daño responderá siempre que existan elementos subjetivos de culpabilidad o negligencia. Es el sistema que impera en países como Italia, Francia, Reino Unido, Nueva Zelanda u Holanda, entre otros muchos. Se trata de un mecanismo en cual, para reparar el daño ambiental, se tiene en cuenta el comportamiento de los sujetos causantes de dichos daños.

Expediente No. 25000-23-27-000-2001-0479-01  
 Acumulados Nos. 2000-0428, 2001-0122, 2001-0343  
 Actor: GUSTAVO MOYA ÁNGEL Y OTROS  
 Acción Popular

- El Sistema Objetivo, en donde el causante del daño responderá aunque no haya habido culpa o negligencia por su parte y sólo podrá excluir su responsabilidad probando que el daño se debió a una fuerza mayor inevitable e irresistible. Es el sistema que impera en Estados Unidos o Alemania.

Según la opinión del documento PNUMA, **el sistema objetivo responde más a una adecuada necesidad de protección ambiental**, en la cual no existen excusas ni atajos, y en donde se prima la defensa del entorno sobre otros derechos secundarios frente a éste. **Es el sistema menos imperfecto para abordar la reparación ambiental, cuya primera fase es la individualización de la responsabilidad.**

Ahora, si ambos sistemas sirven para personalizar la responsabilidad del agente causante del daño ambiental, ninguno de ellos soluciona el problema del sistema de responsabilidad ambiental, que es **cómo se repara el daño una vez identificado el causante del mismo.**

Por otra parte, aunque no pretende la Sala plantear de manera exhaustiva los métodos de valoración del daño ambiental, considera prudente traer a colación algunos de los más empleados, que se resumen en el trabajo realizado por el Banco Mundial en el año 2005<sup>176</sup>.

El citado documento precisa que la valoración del ambiente es un concepto controversial. El principal debate se centra en si es posible dar un valor monetario a los recursos naturales y al ambiente. Ese no es un problema cuando se habla de los precios de los recursos de pesca o de las reservas de petróleo. No obstante, cabe preguntarse si es técnicamente posible o incluso éticamente aceptable asignar un valor al aire limpio o a las aves migratorias.

---

<sup>176</sup>Bolt Katherine, Ruta Giovanni, SarrafMaria "Evaluer les Couts de la Degradation de l'Environnement", Banco Mundial Septembre 2005.

Expediente No. 25000-23-27-000-2001-0479-01  
Acumulados Nos. 2000-0428, 2001-0122, 2001-0343  
Actor: GUSTAVO MOYA ÁNGEL Y OTROS  
Acción Popular

Señala el estudio que los economistas ambientales están interesados en el concepto de valor desde un punto de vista estrictamente antropocéntrico. Lo que ellos examinan es la voluntad de los individuos de utilizar en el ambiente recursos escasos que podrían emplearse para otros propósitos. Ello significa que si los individuos dan gran importancia a las aves migratorias, su propensión a gastar dinero en la conservación de esas aves será alta. Pero lo que se valora allí no es el valor intrínseco de las aves, que es totalmente independiente de la existencia del hombre, sino la importancia que le da el hombre a tales aves. Incluso otra forma de valor económico surge por ejemplo cuando los individuos están dispuestos a pagar por un bien que jamás verán, solo para asegurar que alguien más en el futuro pueda hacerlo.

Indica que los economistas definen el valor económico como el máximo de la voluntad de pagar por un recurso ecológico o natural. Asumiendo que un bien ambiental tiene alguna importancia para los individuos, la demanda por ese bien existe aún si no existe un mercado para transarlo. No se observan en el mundo real mercados para el aire limpio, pero si se observa la conducta de los individuos se puede notar que ellos utilizan recursos para mitigar los efectos del aire contaminado a su alrededor. Por ejemplo compran filtros de aire para reducir su exposición al aire contaminado o se someten a tratamientos para el asma para aminorar sus efectos. Esta información es la que permite a los economistas establecer los valores económicos del medio ambiente.

El citado estudio analiza luego diferentes métodos de valoración del daño, que incluyen: el análisis costo beneficio, el análisis de cambios en la productividad, la valoración de las conductas de defensa y mitigación, el método de los costos de viaje, el método de los precios hedonistas, el método de valoración contingente, así como los

Expediente No. 25000-23-27-000-2001-0479-01  
Acumulados Nos. 2000-0428, 2001-0122, 2001-0343  
Actor: GUSTAVO MOYA ÁNGEL Y OTROS  
Acción Popular

métodos de medición de los efectos de la polución sobre la salud.

La sala considera de gran importancia este recorrido sumario que se ha hecho sobre los métodos de valoración del daño ambiental, pues como lo señala Manuel Castañón del Valle en el informe antes mencionado "Sin valoración del daño ambiental no puede articularse, con unas mínimas garantías de éxito, un sistema de resarcimiento de daños al medio ambiente. Sin saber lo que cuesta reparar un daño no se puede exigir la reparación o indemnización del mismo"<sup>177</sup>.

Por lo anterior, considera la Sala que la Gerencia Estratégica de Cuenca, a la que se hará referencia en el siguiente componente, deberá establecer las metodologías de valoración y realizar la valoración de los costos económicos del deterioro y de la conservación del medio ambiente y los recursos naturales renovables de manera que sea posible cuantificar en términos económicos los aportes de los bienes y servicios ambientales del hidrosistema del río Bogotá a la economía local y nacional, con el fin de que (i) las autoridades involucradas en el manejo integral de dicha cuenca puedan determinar las fuentes de recursos y de que las tasas ambientales y los mecanismos de retribución por el uso de esos bienes y servicios ambientales sean distribuidos adecuadamente a lo largo de las comunidades involucradas en la misma y (ii) se puedan identificar los impactos de los programas de recuperación del río.

---

<sup>177</sup>CASTAÑÓN de Valle Manuel "Valoración del Daño Ambiental" Pnuma Programa de las Naciones Unidas para el Medio Ambiente. Oficina Regional para América Latina y el Caribe. 2006.

Expediente No. 25000-23-27-000-2001-0479-01  
Acumulados Nos. 2000-0428, 2001-0122, 2001-0343  
Actor: GUSTAVO MOYA ÁNGEL Y OTROS  
Acción Popular

## **Objetivo 7. Definición e implementación de instrumentos de auditoría ambiental**

En primer lugar es necesario puntualizar que la auditoría ambiental, en términos generales, hace referencia a una herramienta que comprende una sistemática, documentada, periódica y objetiva evaluación de la gestión de cumplimiento de normas ambientales por parte de una organización y de su efectividad.

Ahora, es preciso aludir a diversos sistemas de auditoría ambiental existentes a nivel internacional, con el fin de vislumbrar los elementos que estos aportan a la hora de emprender el establecimiento y la revisión periódica y eficaz de un sistema de gestión ambiental, bien en el marco del sector público o privado. Ello, considerando que es esta una de las metodologías de mayor reconocimiento por parte de las entidades, por cuanto de ella resulta posible la determinación objetiva del cumplimiento de metas y/o indicadores de la gestión ambiental de que se trate, así como de su mejoramiento continuo.

Para efectos de visualizar los elementos que comprende una labor de auditoría se necesita, como punto de partida, la existencia de determinadas normas, reglas o procedimientos respecto de las cuales se requiera su cumplimiento en materia ambiental. Así, y dada la ausencia de uniformidad en este tipo de normas y/o procedimientos en diversos países, la Organización Internacional para la Estandarización ISO, profirió las normas ISO 14000 a partir de 1996<sup>178</sup>.

Los estándares previstos en las normas ISO procuran proveer un lenguaje común para la gestión ambiental al establecer un marco para la certificación de sistemas de gestión ambiental

---

<sup>178</sup> [www.iso.org](http://www.iso.org).

Expediente No. 25000-23-27-000-2001-0479-01  
Acumulados Nos. 2000-0428, 2001-0122, 2001-0343  
Actor: GUSTAVO MOYA ÁNGEL Y OTROS  
Acción Popular

por parte de terceros y al instruir a la industria a satisfacer la demanda de los consumidores y agencias gubernamentales respecto de la responsabilidad ambiental que les concierne.

Ahora, se debe tener en cuenta que las normas estipuladas por ISO 14000 no fijan metas ambientales para la prevención de la contaminación, ni tampoco se involucran en el desempeño ambiental a nivel mundial, sino que, establecen herramientas y sistemas enfocados a los procesos de producción al interior de una empresa u organización, y de los efectos o externalidades que de estos se deriven hacia el medio ambiente.

Podría decirse, entonces, que **ISO 14000 es una herramienta de gestión que permite a una organización de cualquier tipo controlar el impacto de sus actividades, productos o servicios en el medio ambiente.**

A partir de dichas normas, es posible identificar aspectos de un negocio o actividad que tienen un impacto en el medio ambiente y comprender las leyes medioambientales que son significativas para esa situación. **El paso siguiente consiste en generar objetivos de mejoramiento y un programa de gestión para alcanzarlos, con revisiones periódicas para el progreso continuo.** De este modo, se evalúa el sistema regularmente y, si cumple la normativa, es viable registrar la compañía o la sede para la norma ISO 14001 u otra de este rango.

El Estándar Internacional para Sistemas de Gestión Medioambiental, ISO 14001, destaca los siguientes hechos de buenas prácticas:

- Implementación de una política medioambiental.
- Planificación - teniendo en cuenta aspectos medioambientales, y requisitos legales y de otra índole;

Expediente No. 25000-23-27-000-2001-0479-01  
Acumulados Nos. 2000-0428, 2001-0122, 2001-0343  
Actor: GUSTAVO MOYA ÁNGEL Y OTROS  
Acción Popular

establecimiento de objetivos y metas, e introducción de programas de gestión medioambiental.

- Implementación y operación - establecimiento de estructuras y responsabilidades, formación de personal y comunicación de los requisitos fundamentales; documentación de sistemas de gestión medioambiental; operación de sistemas; y preparación de planes de emergencia.
- Control y puesta en marcha de acciones correctivas - control y medición; identificación de no conformidad y puesta en marcha de acciones; y auditoría de sistemas de gestión medioambiental.
- Control de la gerencia con respecto a todos los aspectos del sistema.

Aun cuando las normas estandarizadas de gestión medioambiental en el marco de la ISO, constituyen un punto de referencia importante a la hora de emprender un sistema de auditoría ambiental, es claro que no toda gestión de auditoría en esta materia se ha de efectuar necesariamente tomando como parámetro este tipo de reglas, pues también existen otras entidades, organizaciones y sistemas tendientes a controlar el cumplimiento de normas o reglas ambientales y de su efectividad, en función de la actividad o programa a ser auditado.

Así por ejemplo, el **EMAS** Eco-Management and Audit Scheme, o Reglamento Comunitario de Ecogestión y Ecoauditoría es la normativa desarrollada por la Comisión Europea que reconoce a aquellas organizaciones que han implantado un Sistema de Gestión Medioambiental SGMA y han adquirido un compromiso de mejora continua, verificado mediante auditorías independientes. Las organizaciones reconocidas con el EMAS, ya sean compañías industriales, pequeñas y medianas empresas, organizaciones del tercer sector, administraciones y organizaciones internacionales, incluidas la Comisión Europea

Expediente No. 25000-23-27-000-2001-0479-01  
Acumulados Nos. 2000-0428, 2001-0122, 2001-0343  
Actor: GUSTAVO MOYA ÁNGEL Y OTROS  
Acción Popular

y el Parlamento Europeo, tienen una política medioambiental definida, hacen uso de un sistema de gestión medioambiental y dan cuenta periódicamente del funcionamiento de dicho sistema a través de una declaración medioambiental verificada por organismos independientes. Estas entidades son reconocidas con el logotipo EMAS, que garantiza la fiabilidad de la información dada por dicha empresa<sup>179</sup>.

Comúnmente, los esquemas de acreditación han sido establecidos para las organizaciones comerciales e industriales. Sin embargo, los sistemas de gestión involucrados también son aplicables a los gobiernos.

En este contexto, resulta de gran importancia destacar los estándares internacionales utilizados por las **entidades fiscalizadoras superiores (EFS)**, emitidos por la Organización Internacional de estas (**INTOSAI**, por sus siglas en inglés)<sup>180</sup>, en relación con el medio ambiente.

La Directriz emitida por la **INTOSAI** intenta proveer un sólido punto de partida desde el cual pueda crearse un enfoque para el cumplimiento de las responsabilidades de la auditoría medioambiental en el contexto de cada jurisdicción y mandato de las EFS. Es así como la Organización, con fundamento en los estándares de auditoría, desarrolló una metodología para: i) conducir auditorías ambientales; y ii) desarrollar un criterio técnico en el marco de las EFS.

La INTOSAI, alude a la auditoría medioambiental como una denominación práctica, generalmente utilizada para la descripción de un conjunto de actividades, tales como

---

<sup>179</sup><http://ec.europa.eu>.

<sup>180</sup> La Organización Internacional de Entidades Fiscalizadoras Superiores (INTOSAI) es la organización central para la fiscalización pública exterior. Desde más de 50 años la INTOSAI ha proporcionado un marco institucional para la transferencia y el aumento de conocimientos para mejorar a nivel mundial la fiscalización pública exterior y por lo tanto fortalecer la posición, la competencia y el prestigio de las distintas EFS en sus respectivos países. La INTOSAI es un organismo autónomo, independiente y apolítico. Es una organización no gubernamental con un estatus especial con el Consejo Económico y Social de las Naciones Unidas (ECOSOC). [www.intosai.org](http://www.intosai.org).

Expediente No. 25000-23-27-000-2001-0479-01  
Acumulados Nos. 2000-0428, 2001-0122, 2001-0343  
Actor: GUSTAVO MOYA ÁNGEL Y OTROS  
Acción Popular

política de auditorías, certificación de productos, medidas de control gubernamental y muchas otras actividades, que guardan poca o ninguna relación con una auditoría externa.

Ahora, para destacar la importancia de este tipo de auditoría, en el marco de estas normas<sup>181</sup> se lee:

*"Con creciente conciencia del público, la demanda de la responsabilidad pública de personas o de entidades que gestionan recursos públicos se ha hecho cada vez más evidente, de modo que existe una mayor necesidad de que haya proceso de responsabilidad y de que éste opere efectivamente".*

Desde luego, **un transparente y objetivo sistema de auditoría, ha de contribuir a que ese proceso de responsabilidad a que alude la norma, pueda ser efectivo en términos de resultados del sistema de gestión medioambiental.**

Del mismo modo, llama la atención que el documento citado indica que el anterior postulado abarca a todas las entidades que causan impacto en el medio ambiente. Dichas entidades pueden clasificarse en tres grupos:

- Entidades cuyas actividades afectan directa o indirectamente al medio ambiente, de manera positiva o negativa - como por rehabilitación o (a la inversa) por polución o utilización -.
- Entidades con poderes para producir formular y regular la política medioambiental, o para influir en ellas, ya sea en ámbito internacional, nacional o local.
- Entidades con poder para controlar y fiscalizar acciones medioambientales ejecutadas por terceros.

En lo que respecta a los procesos de responsabilidad, se observa lo siguiente:

---

<sup>181</sup> Párrafos 20 -22 de las normas de auditoría ISSAI 5110.

Expediente No. 25000-23-27-000-2001-0479-01  
 Acumulados Nos. 2000-0428, 2001-0122, 2001-0343  
 Actor: GUSTAVO MOYA ÁNGEL Y OTROS  
 Acción Popular

*"La elaboración de la información precisa, el control, la evaluación y los sistemas de informes en el ámbito gubernamental, facilitarán el proceso de responsabilidad.*

*La gestión es responsable de la corrección y de la suficiencia de la forma y del contenido de los estados contables y de otro tipo de información".<sup>182</sup>*

Lo anterior, en términos del mismo documento, **implica que en los más altos niveles, el gobierno es responsable de determinar qué información necesita para averiguar si sus objetivos medioambientales se están realizando, cómo debe medirse la realización de esos objetivos, y con qué regularidad desea obtener la información.**

La entidad y su gestión son directamente responsables de la corrección y la suficiencia de la información acerca del impacto de dicha entidad en el medio ambiente, ya sea con atención al rendimiento financiero, pasivos y activos, de conformidad con la legislación, u otras prescripciones para su rendimiento.

De otra parte, las normas de la INTOSAI en comento también prevén la posibilidad de que las legislaciones medioambientales no indiquen con suficiencia parámetros de cumplimiento claros, en cuyo caso expresan lo siguiente respecto de la actuación de una EFS:

*"Cuando las EFS promuevan la mejora de legislaciones u otras prescripciones, deberán estimular a las entidades fiscalizadas a que informen imparcialmente sobre su propio rendimiento medioambiental, aunque se trate de violación o de ausencia de información.*

*Las autoridades correspondientes deberán asegurar la promulgación de normas de contabilidad aceptables para los estados contables (...) y las entidades fiscalizadas deberán elaborar objetivos y metas de rendimiento específicos y medibles<sup>183</sup>".*

---

<sup>182</sup> Normas de auditoría párrafos 23-24.

<sup>183</sup> Normas de auditoría párrafos 25-27.

Expediente No. 25000-23-27-000-2001-0479-01  
Acumulados Nos. 2000-0428, 2001-0122, 2001-0343  
Actor: GUSTAVO MOYA ÁNGEL Y OTROS  
Acción Popular

En lo atinente al alcance de la auditoría medioambiental, la guía INTOSAI, indica que esta se incorpora a la auditoría gubernamental - auditoría de regularidad (financiera y de conformidad) y de rendimiento.

Así, por ejemplo, señala que durante una auditoría de estados contables, los asuntos medioambientales deberán incluir lo siguiente:

- Iniciativas para prevenir, disminuir o remediar daños al medio ambiente.
- La conservación tanto de los recursos sostenibles como la de los no sostenibles.
- Las consecuencias de la violación de leyes y regulaciones medioambientales.
- Las consecuencias de responsabilidad de depósito de garantía impuesta por el Estado.

La auditoría debe contribuir a proporcionar la garantía de que las actividades gubernamentales se llevan a cabo de acuerdo con las disposiciones medioambientales relevantes, normas y políticas, tanto en el ámbito nacional como internacional.

La ejecución de la auditoría del rendimiento de actividades medioambientales debe incluir:

- La garantía de que los indicadores de rendimiento con respecto a asuntos medioambientales (en caso de que se hallen presentes en informes públicos contables) reflejen de manera justa el rendimiento de la entidad fiscalizada.
- La garantía de que los programas medioambientales se ejecutan de manera económica, eficiente y efectiva.

Es del caso subrayar que la guía INTOSAI señala que **para efectos de llevar a cabo una auditoría medioambiental estructurada el equipo de gestión planeará y documentará los**

Expediente No. 25000-23-27-000-2001-0479-01  
Acumulados Nos. 2000-0428, 2001-0122, 2001-0343  
Actor: GUSTAVO MOYA ÁNGEL Y OTROS  
Acción Popular

**elementos clave de su sistema de gestión medioambiental.** Ello puede abarcar los siguientes aspectos, entre otros:

- Identificación de requisitos legislativos y reguladores aplicables.
- Establecimiento y mantenimiento de políticas y procedimientos para ofrecer garantía razonable de que la entidad cumplirá con dichos requisitos.
- Evaluación y control de la conformidad de la entidad con requisitos externos, políticas y procedimientos medioambientales.
- Elaboración de informes que satisfagan requisitos legales, reguladores, u otros.

Nótese, entonces, que un sistema de gestión medioambiental a ser auditado puede abarcar parámetros que superen las reglas establecidas por determinados estándares de acreditación como ISO u otros, resultando en esencia, de vital importancia el que se identifiquen las regulaciones locales o internacionales, políticas, procedimientos necesarios e información relevante para verificar el cumplimiento del compromiso de la entidad con el medio ambiente y cómo la observancia de esta normativa en su conjunto resulta eficaz.

Se precisa en el mismo documento, que para el caso de las auditorías del rendimiento de programas medioambientales gubernamentales, los mismos pueden identificarse comúnmente en los planes gubernamentales y en los informes anuales. A veces, un gobierno adjunta sus programas medioambientales a un sencillo plan e informe medioambiental. Cuando no existe tal plan, la EFS puede brindar asistencia en la responsabilidad a través del informe de las diversas políticas del gobierno que sí existen. Para ello, la EFS puede considerar los más importantes asuntos medioambientales que afectan al país y luego identificar e inventariar los programas establecidos por el gobierno para tratarlos.

Expediente No. 25000-23-27-000-2001-0479-01  
Acumulados Nos. 2000-0428, 2001-0122, 2001-0343  
Actor: GUSTAVO MOYA ÁNGEL Y OTROS  
Acción Popular

Del mismo modo, expresa que una EFS debe considerar como un hecho provechoso el reconocimiento de los acuerdos internacionales sobre asuntos medioambientales a los cuales se ha adherido el gobierno, y luego identificar qué programas se han establecido para alcanzar dichos acuerdos.

De otro lado, es posible examinar los impactos que al medio ambiente puede causar una actividad gubernamental, su probable escala y algunos valores correspondientes a sus costes y beneficios. En estos casos, los intercambios con expertos y el análisis de bibliografía pueden identificar metodologías de evaluación usadas comúnmente.

Ahora, cuando la evaluación no sea posible - como en la adjudicación de valor a la pérdida de un paisaje o a una característica medioambiental especial - puede ser de ayuda identificar e investigar las perspectivas de las partes interesadas clave (por ejemplo, grupos residentes en el área afectada por la actividad, grupos clave de interés medioambiental, y organizaciones no gubernamentales del campo) y de académicos especializados en metodologías de evaluación relevantes.

También se puntualiza que el gobierno debe identificar, desde un comienzo, medidas que contrarresten o reduzcan los impactos medioambientales. La auditoría de la EFS debe examinar si estas medidas:

- Han sido implementadas adecuadamente y si están de acuerdo a las mejores prácticas o la mejor tecnología disponible y no causan costes excesivos (BATNEEC); y
- Si habían causado el efecto preventivo buscado, y, si no lo causaron, qué acciones alternativas desplegó el gobierno.

Expediente No. 25000-23-27-000-2001-0479-01  
 Acumulados Nos. 2000-0428, 2001-0122, 2001-0343  
 Actor: GUSTAVO MOYA ÁNGEL Y OTROS  
 Acción Popular

Finalmente, es importante anotar lo que la guía INTOSAI señala en el sentido que los sistemas de gestión medioambiental de mejores prácticas necesitan organizaciones que se propongan a sí mismas metas para mejorar constantemente el rendimiento y para el control de logros. Los sistemas por si mismos no establecen cuáles son las normas apropiadas de rendimiento, pues este es un asunto que corresponde a la gestión de las entidades.

Por otro lado, en EE.UU., existe formalmente una **"Política de Auditoría"** emitida por la **Enviromental Protection Agency EPA** titulada como *"Incentivos para una auto auditoría: descubrimiento, divulgación, corrección y prevención de violaciones"*<sup>184</sup>. El propósito de este mecanismo es el mejoramiento de la protección a la salud humana y al medio ambiente fomentando que las entidades reguladas, voluntariamente descubran, divulguen, corrijan y prevengan violaciones contra las leyes ambientales. Las revelaciones son precedidas por consultas entre la EPA y la entidad regulada, para que entre estas puedan discutir los detalles revelados de la infracción, el cumplimiento y los cronogramas de auditoría.

Los incentivos para que de forma voluntaria una entidad regulada promueva este sistema de auditoría consisten principalmente en la reducción de las multas en que incurriría el infractor de acuerdo con las leyes ambientales<sup>185</sup>, y en el compromiso de no promover una investigación penal contra el transgresor que cumpla los requerimientos de la Política de Auditoría.

Ahora, la política de auditoría contiene importantes salvaguardias para proteger la salud y el medio ambiente, así

---

<sup>184</sup> [www.epa.gov](http://www.epa.gov).

<sup>185</sup> Las multas civiles por violación a leyes ambientales constan de dos componentes: i) una suma de dinero tasada de acuerdo con la gravedad de la infracción; ii) una suma consistente en el beneficio económico que le representó al infractor el haber incumplido las normas ambientales. [www.epa.gov](http://www.epa.gov).

Expediente No. 25000-23-27-000-2001-0479-01  
Acumulados Nos. 2000-0428, 2001-0122, 2001-0343  
Actor: GUSTAVO MOYA ÁNGEL Y OTROS  
Acción Popular

por ejemplo, requiere a las entidades que actúen para prevenir las violaciones recurrentes a las leyes medioambientales y para que remedien todo daño ambiental que hubiere podido generarse. Asimismo, las violaciones repetidas que generen un daño al medio ambiente o que representen un peligro sustancial o inminente, no son objeto de los beneficios de la política de auditoría.

Por su parte, dicha política define auditoría ambiental de manera similar a como se expuso anteriormente, esto es, como una sistemática, documentada, periódica y objetiva revisión por las entidades reguladas de las operaciones y prácticas relacionadas con el cumplimiento de requisitos ambientales. El sistema de gestión de cumplimiento abarca los esfuerzos documentados sistemáticamente de la entidad regulada, de acuerdo con su tamaño y negocio, para detectar y corregir violaciones respecto de lo siguiente:

- Cumplimiento de políticas, estándares y procedimientos que identifiquen cómo los empleados o agentes cumplen los requisitos, regulaciones, permisos, acuerdos obligatorios y otras fuentes de autoridad de requisitos ambientales.
- Asignación de la responsabilidad para supervisar el cumplimiento tanto general de políticas, estándares y procedimientos, como específicos en cada operación.
- Mecanismos para asegurar que sistemáticamente el acatamiento de las políticas, estándares y procedimientos se está llevando a cabo incluyendo el monitoreo de los sistemas de auditoría razonablemente diseñados para detectar y corregir violaciones, y la evaluación periódica del rendimiento del sistema de gestión de cumplimiento.
- Esfuerzos para comunicar efectivamente a los empleados y agentes los procedimientos y estándares de la entidad regulada.

Expediente No. 25000-23-27-000-2001-0479-01  
Acumulados Nos. 2000-0428, 2001-0122, 2001-0343  
Actor: GUSTAVO MOYA ÁNGEL Y OTROS  
Acción Popular

- Procedimientos para la pronta y apropiada corrección de cualquier violación o de cualquier modificación necesaria al sistema de gestión de cumplimiento de la entidad regulada para prevenir futuras violaciones, entre otras.

La Política de Auditoría establece los elementos de consideración que guiarán a la Agencia en el ejercicio de su aplicación discrecional, sin que represente su actuación final.

En este contexto, la Sala encuentra que la Gerencia Estratégica de Cuenca a que se refiere el siguiente componente, debe identificar e implementar un sistema de auditoría que permita establecer las actividades de sus vigiladas que impactan el medio ambiente en relación específica con el río Bogotá.

El sistema de gestión ambiental a establecer debe contener objetivos claros de mejoramiento de la gestión ambiental de las entidades vigiladas. Este sistema debe incluir, además, la determinación de las normas que permitan alcanzar los objetivos propuestos y cuyo cumplimiento será objeto de medición y seguimiento continuo por parte de la autoridad. Además, la entidad fiscalizadora escogida debe ser independiente.

**Objetivo 8. Generación de conocimiento científico - técnico a través de la investigación como fundamento de los procesos de planificación ambiental**

El desarrollo de esta estrategia tiene fundamento en el principio 6° del artículo 1° de la Ley 99 de 1993, el cual se refiere a la formulación de las políticas ambientales teniendo en cuenta la investigación científica y el conocimiento general y específico - técnico ambiental. El artículo a la letra reza:

Expediente No. 25000-23-27-000-2001-0479-01  
Acumulados Nos. 2000-0428, 2001-0122, 2001-0343  
Actor: GUSTAVO MOYA ÁNGEL Y OTROS  
Acción Popular

*"La formulación de las políticas ambientales tendrán cuenta el resultado del proceso de investigación científica. No obstante, las autoridades ambientales y los particulares darán aplicación al principio de precaución conforme al cual, cuando exista peligro de daño grave e irreversible, la falta de certeza científica absoluta no deberá utilizarse como razón para postergar la adopción de medidas eficaces para impedir la degradación del medio ambiente".*

El objetivo es construir conocimiento en materia ambiental, que se genere y suministre información científica y técnica en los procesos de planificación, estructuración, desarrollo y ejecución de proyectos, y así propender por la gestión integral y eficiente tanto del recurso hídrico como del saneamiento ambiental.

Lo que se pretende es reducir la incertidumbre en el proceso de planificación ambiental a largo, corto y mediano plazo, se busca contribuir en la construcción de los planes regionales y locales. El desconocimiento de las nuevas realidades es una razón de peso para la búsqueda de nuevas y mejores alternativas.

Sobre el particular, el entonces Ministerio de Ambiente, Vivienda y Desarrollo Territorial, MAVDT, encargó al Instituto Quinaxi la formulación participativa del PLAN ESTRATEGICO NACIONAL DE INVESTIGACION AMBIENTAL, PENIA, para definir los temas y áreas prioritarios de investigación, desarrollo e innovación, de acuerdo con los intereses y objetivos nacionales y para armonizar y focalizar los instrumentos de planificación de los institutos de investigación del Sistema Nacional Ambiental, SINA.

Lo que se buscó fue responder al propósito de avanzar en el proceso de consolidación de esta actividad en Colombia, para ello se buscó la formulación participativa de este Plan para definir las prioridades de la investigación ambiental para los cinco institutos vinculados y adscritos al MAVDT (Instituto de Investigaciones Marinas y Costeras "José Benito

Expediente No. 25000-23-27-000-2001-0479-01  
Acumulados Nos. 2000-0428, 2001-0122, 2001-0343  
Actor: GUSTAVO MOYA ÁNGEL Y OTROS  
Acción Popular

Vives de Andréis", INVEMAR, Instituto de Hidrología, Meteorología y estudios Ambientales, IDEAM, Instituto Amazónico de Investigaciones Científicas, SINCHI, Instituto de Investigación de Recursos Biológicos "Alexander Von Humboldt", Instituto de Investigaciones Ambientales del Pacífico), creados por la Ley 99 de 1993, buscando hacerla más focalizada y eficaz y reiterando su carácter de herramienta de apoyo para la gestión ambiental y para el logro de las metas y objetivos nacionales.

Resulta oportuno recalcar que dicha iniciativa debe enmarcarse no solo dentro de la función misional de cada uno de los institutos, sino que además debe vincular actores externos, tales como las autoridades ambientales regionales, distritales y locales, y los claustros universitarios principales intervinientes en la generación de conocimiento, como es el caso del IDEA en la Universidad Nacional<sup>186</sup>.

Antes de la promulgación del plan estratégico el problema consistía en la falta de articulación de la investigación, la cual no estaba orientada temáticamente ni priorizada, hoy día puede señalarse que en un gran porcentaje el inconveniente se presenta en que la misma no está generando valor agregado en los procesos de gestión y toma de decisión.

De una parte, en el ámbito institucional existen problemas en la consolidación y articulación del Sistema Nacional de Ciencia y Tecnología con el Sistema Nacional Ambiental -SINA, por lo que debe propenderse por el fortalecimiento de dicho sistema y articular los distintos niveles para lograr un enfoque sistémico regional unidireccional. De otra, los

---

<sup>186</sup>La misión del Instituto de Estudios Ambientales **-IDEA-**, es contribuir, en el marco del trabajo interdisciplinario e interinstitucional, al conocimiento del ambiente, entendido este como una visión de la realidad en la que interactúan procesos ecosistémicos y culturales, al aprovechamiento sostenible de sus potencialidades y a la solución de los problemas del trópico, para mejorar la calidad de vida mediante la creación de pensamiento, la generación de procesos educativos, la investigación científica y el desarrollo tecnológico.

Expediente No. 25000-23-27-000-2001-0479-01  
Acumulados Nos. 2000-0428, 2001-0122, 2001-0343  
Actor: GUSTAVO MOYA ÁNGEL Y OTROS  
Acción Popular

instrumentos y recursos para compartir los resultados de las investigaciones son insuficientes.

Aunado a lo anterior, se carece de permanentes canales de divulgación y difusión, haciendo, se repite, inocua la labor científica y tecnológica en relación con la actividad de las autoridades ambientales.

Es en este contexto y reconociendo la importancia de la ciencia, la innovación y la tecnología, en el marco de la gestión integral de la cuenca hidrográfica del río Bogotá que la Sala ordenará:

1. Que la Corporación Autónoma Regional de Cundinamarca - CAR, la Gobernación de Cundinamarca por medio de su Secretaría Departamental de Ambiente y el Distrito Capital a través de su Secretaría de Ambiente:

A. Adoptar el Plan Estratégico Nacional de Investigación Ambiental del Ministerio de Ambiente y Desarrollo Sostenible como herramienta para la realización de una gestión eficiente y eficaz, orientada a la sostenibilidad ambiental.

B. Ampliar los procesos de discusión y toma de decisión, permitiendo especialmente la cooperación y participación de la comunidad científica.

C. Mejorar y estandarizar los procesos de intercambio de conocimiento con la comunidad científica, particularmente con la suscripción de convenios con los principales institutos de investigación ambiental universitaria, lo anterior con el fin de generar y suministrar información científica y técnica para los procesos de planificación, estructuración, desarrollo y ejecución de proyectos.

Expediente No. 25000-23-27-000-2001-0479-01  
Acumulados Nos. 2000-0428, 2001-0122, 2001-0343  
Actor: GUSTAVO MOYA ÁNGEL Y OTROS  
Acción Popular

D. Ejecutar las medidas administrativas necesarias para la articulación de los distintos niveles territoriales y competencias en materia de investigación científica y tecnológica, en aras de lograr un enfoque sistémico regional unidireccional.

E. Adoptar las medidas necesarias para la difusión y divulgación de los resultados de las investigaciones científicas, tecnológicas y de innovación en materia ambiental que se produzcan en: i) el seno de su actuación, ii) en el de los Institutos y iii) en el de las Universidades.

2. Que el Ministerio de Ambiente y Desarrollo Sostenible acompañe de manera permanente a través de sus institutos y a la Corporación Autónoma Regional de Cundinamarca - CAR, la Gobernación de Cundinamarca por medio de su Secretaria Departamental de Ambiente y el Distrito Capital a través de su Secretaría de Ambiente en los procesos de generación de conocimiento en el marco de los instrumentos de planificación y toma de decisión.

3. Que el Ministerio de Ambiente y Desarrollo Sostenible y Colciencias consoliden el proceso de articulación del Sistema Nacional de Ciencia, Tecnología e innovación con el Sistema Nacional Ambiental - SINA.

**Objetivo 9. Implementación del observatorio regional ambiental y de desarrollo sostenible del río Bogotá Orarbo-**

#### **ANTECEDENTES**

##### **1.1. Definición**

El Diccionario de la Real Academia de la Lengua Española, ha definido el observatorio como:

Expediente No. 25000-23-27-000-2001-0479-01  
Acumulados Nos. 2000-0428, 2001-0122, 2001-0343  
Actor: GUSTAVO MOYA ÁNGEL Y OTROS  
Acción Popular

- Lugar o posición que sirve para hacer observaciones.
- Edificio con inclusión del personal e instrumentos apropiados y dedicados a observaciones, por lo común astronómicas o meteorológicas.

1.2. Generalidades de los Observatorios

Según la doctrina ambiental los observatorios fueron creados en la década de los sesenta. Los cuales fueron orientados a temas socioeconómicos, como *"instrumento de recogida, producción y análisis de los datos y de información económica, social y territorial, con el objetivo de conocer la situación urbana y las transformaciones actuales y facilitar la toma de decisiones"* (Soy, 1991. Citado por Phelan, 2007)<sup>187</sup>.

De acuerdo con este autor, en las localidades de Europa se implementaron observatorios con el objeto de analizar más en detalle cada una de las problemáticas sociales, económicas, laborales, tecnológicas, problemas de desempleo, entre otras.

El cuadro que a continuación se introduce, demuestra los diferentes observatorios que se han implantado en diferentes partes del mundo incluido nuestro país<sup>188</sup>.

| NOMBRER E                                    | OBJETIVO                                                                                                                                                                                                                                    | TEMA   | AÑO  | ADMINISTRAD OR                            |
|----------------------------------------------|---------------------------------------------------------------------------------------------------------------------------------------------------------------------------------------------------------------------------------------------|--------|------|-------------------------------------------|
| Observa torio Andino                         | Recopilación de estudios e información, con miras al mantenimiento de una base de datos actualizada permanentemente sobre los países de la región <a href="http://www.observatorioandino.org.co">http://www.observatorioandino.org.co</a>   | Social | 2002 | Universi dad Javerian a de Colombia       |
| Observa torios de Salud Asociac ión de Salud | Producir información y datos de inteligencia sobre la salud de las personas y la asistencia sanitaria para los profesionales, responsables políticos y la comunidad en general. <a href="http://www.apho.org.uk">http://www.apho.org.uk</a> | Salud  | 2005 | Asociaci ón de Salud Pública Gran Bretaña |

<sup>187</sup>Pérez Rojas, Juliana Andrea, Tesis de grado, Título: Diseño de un observatorio ambiental para el sector de Curtiembres, estudio de caso: curtiembres de Villa pinzón y Chocontá, 2010.  
<sup>188</sup>Ibídem.

Expediente No. 25000-23-27-000-2001-0479-01  
Acumulados Nos. 2000-0428, 2001-0122, 2001-0343  
Actor: GUSTAVO MOYA ÁNGEL Y OTROS  
Acción Popular

|                                                                      |                                                                                                                                                                                                                                                                                                                                                                                                                                                                                                                |                            |      |                                                           |
|----------------------------------------------------------------------|----------------------------------------------------------------------------------------------------------------------------------------------------------------------------------------------------------------------------------------------------------------------------------------------------------------------------------------------------------------------------------------------------------------------------------------------------------------------------------------------------------------|----------------------------|------|-----------------------------------------------------------|
| Pública                                                              |                                                                                                                                                                                                                                                                                                                                                                                                                                                                                                                |                            |      |                                                           |
| Observatorio del Hambre                                              | Apoyo a la decisión de agentes claves en la formulación de políticas públicas y programas en América Latina y el Caribe en materia de Seguridad Alimentaria y Nutricional, mediante la recopilación, procesamiento, almacenamiento, seguimiento y difusión de información cualitativa y cuantitativa relevante que genere conocimiento provechoso a la toma de decisiones.<br><a href="http://www.observatoriodelhambre.net">http://www.observatoriodelhambre.net</a>                                          | Salud                      |      | FAO                                                       |
| Biomanzales Observatorios para el Desarrollo Sostenible              | El Sistema de Observatorios para el Desarrollo Sostenible del Municipio de Manizales, permite el registro, almacenamiento, validación, proceso, análisis, distribución y divulgación de información sobre indicadores ambientales, sociales y económicos de las distintas unidades territoriales que integran el municipio.<br><a href="http://idea.manizales.unal.edu.co/SI/ODSII/html/informacion.htm">http://idea.manizales.unal.edu.co/SI/ODSII/html/informacion.htm</a>                                   | Ambiente Social Económico  | 2001 | IDEA UN Manizales                                         |
| Observatorio Internacional de Ciudadanía y Medio Ambiente Sostenible | Ser el punto de acceso a una colección de datos y ofrecer un servicio de análisis de los mismos a nivel regional. Cubren actividades relacionadas con la investigación aplicada, la asesoría y consultoría, la educación y formación en distintos niveles, y la difusión de información.<br><a href="http://www.cimas.eurosur.org/">http://www.cimas.eurosur.org/</a>                                                                                                                                          | Social                     | 2001 | Instituto Universitario "IEPALA, Rafael Burgaleta" España |
| Observatorio Medio Ambiente e inmigrantes en PYMES                   | Servir como guía para obtener recursos, contactos y material bibliográfico, para aquellos usuarios que deseen profundizar en el conocimiento de la gestión ambiental en su entorno laboral.<br><a href="http://www.medioambiente.global.net/">http://www.medioambiente.global.net/</a><br><a href="http://www.global.net/">http://www.global.net/</a>                                                                                                                                                          | Gestión Ambiental          | -    | Instituto Universitario "IEPALA" y Fundación Biodiversa   |
| Observatorio de Desarrollo Sostenible                                | Medir, hacer seguimiento y evaluación del Impacto que genera el desarrollo sobre la oferta de recursos naturales y la demanda de bienes y servicios, relacionada principalmente con la presión que ejerce la población a través de las actividades sociales, económicas y territoriales en el marco de los planes, programas y proyectos de desarrollo.<br><br><a href="http://websnlvdt.minambiente.gov.co/snlvdt/glosario.aspx?letra=o">http://websnlvdt.minambiente.gov.co/snlvdt/glosario.aspx?letra=o</a> | Económico Social Ambiental | 2002 | MAVDT                                                     |
| Observatorio del Desarrollo Regional                                 | Monitorear y apoyar la coordinación, articulación y armonización del proceso de planificación territorial regional y subregional.                                                                                                                                                                                                                                                                                                                                                                              | Económico Social Ambiental |      |                                                           |
| Observa                                                              | Desarrollar herramientas de                                                                                                                                                                                                                                                                                                                                                                                                                                                                                    |                            |      |                                                           |

Expediente No. 25000-23-27-000-2001-0479-01  
Acumulados Nos. 2000-0428, 2001-0122, 2001-0343  
Actor: GUSTAVO MOYA ÁNGEL Y OTROS  
Acción Popular

|                                                                           |                                                                                                                                                                                                                                                                                                                                                                                                                                               |                                                                                 |      |                                                                                     |
|---------------------------------------------------------------------------|-----------------------------------------------------------------------------------------------------------------------------------------------------------------------------------------------------------------------------------------------------------------------------------------------------------------------------------------------------------------------------------------------------------------------------------------------|---------------------------------------------------------------------------------|------|-------------------------------------------------------------------------------------|
| toire du Littoral                                                         | previsión para anticiparse a los cambios más importantes en la costa y proporcionar el apoyo a las decisiones para la definición y adaptación de políticas públicas.<br><a href="http://www.littorial.ifen.fr/Observatoire.9.0.html">http://www.littorial.ifen.fr/Observatoire.9.0.html</a>                                                                                                                                                   | Ambiental Social y Económica                                                    | 2006 | Departamento de Observación y Estadística de Francia.                               |
| Observatoire des territoires                                              | Facilitar el acceso del mayor número de personas a una selección de datos territoriales generados por los organismos públicos.<br><a href="http://www.territoires.gouv.fr/indicateurs/portails/index.php">http://www.territoires.gouv.fr/indicateurs/portails/index.php</a>                                                                                                                                                                   | Desarrollo Sostenible                                                           | 2004 | DIAC Francia                                                                        |
| Observatorio del Desarrollo                                               | Proporcionar información relevante y oportuna al proceso nacional de toma de decisiones sobre el desarrollo costarricense.                                                                                                                                                                                                                                                                                                                    | Ambientales, Sociales, Económicas e Institucionales.                            | 1997 | Universidad de Costa Rica                                                           |
| Observatorio de la Sostenibilidad en España                               | Convertirse en un centro de referencia de ámbito estatal que recopile, elabore y evalúe información básica de la sostenibilidad en España.<br><a href="http://www.sostenibilidad-es.com/Observatorio+Sostenibilidad/es/acercade/">http://www.sostenibilidad-es.com/Observatorio+Sostenibilidad/es/acercade/</a>                                                                                                                               | Sostenibilidad ambiental, Social, Económica                                     | 2005 | Universidad Alcalá                                                                  |
| Observatorio Ambiental y de Responsabilidad Social en el Ámbito Sanitario | Obtener, analizar y difundir información relativa a actividades, iniciativas, programas, políticas y decisiones que en el ámbito de la sostenibilidad y la responsabilidad social corporativa puedan afectar al sector sanitario.<br><a href="http://www.observatorioambiental.net/index.php">http://www.observatorioambiental.net/index.php</a>                                                                                              | Ambiente                                                                        | 2007 | OMARS España                                                                        |
| Observatorio Urbano de la Ciudad de Córdoba                               | Construcción de herramientas eficaces para el análisis económico-territorial de la Ciudad de Córdoba, que permitan el seguimiento adecuado del entorno cambiante al cual se enfrentan el Estado municipal y los actores productivos y sociales a la hora de la toma de decisiones.<br><a href="http://www.cordoba.gov.ar/Cordobaciudad/principal2/default.asp?ir=44">http://www.cordoba.gov.ar/Cordobaciudad/principal2/default.asp?ir=44</a> | Pobreza Urbana, movilidad, contaminación, eficiencia energética y uso del agua. | 2004 | Municipalidad de Córdoba Argentina                                                  |
| State of the Environment Infobase Environment Canada                      | Realizar un seguimiento del estado del medio ambiente y de medir el progreso hacia el desarrollo sostenible.<br><a href="http://www.ec.gc.ca/soer-ree/English/Indicator_series/default.cfm#plc">http://www.ec.gc.ca/soer-ree/English/Indicator_series/default.cfm#plc</a>                                                                                                                                                                     | Ambiente                                                                        | 2001 | División de Estrategias de Integración y Conocimientos de Medio Ambiente de Canadá. |
| Observatorio Laboral para la Educación                                    | El objetivo es hacer seguimiento a la educación superior en Colombia, le apunta a generar estrategias pertinentes que disminuyan las tasas de deserción de los estudiantes en la educación superior, además de conocer los comportamientos estudiantiles de los alumnos.                                                                                                                                                                      | Social                                                                          | 2005 | Ministerio de Educación Colombia                                                    |

Expediente No. 25000-23-27-000-2001-0479-01  
Acumulados Nos. 2000-0428, 2001-0122, 2001-0343  
Actor: GUSTAVO MOYA ÁNGEL Y OTROS  
Acción Popular

|                                  |                                                                                                                                                                                                                                                                                                   |        |      |                                           |
|----------------------------------|---------------------------------------------------------------------------------------------------------------------------------------------------------------------------------------------------------------------------------------------------------------------------------------------------|--------|------|-------------------------------------------|
|                                  | <a href="http://www.graduadoscolombia.edu.co/html/1732/channel.html">http://www.graduadoscolombia.edu.co/html/1732/channel.html</a>                                                                                                                                                               |        |      |                                           |
| Observatorio laboral de México   | Ofrecer información confiable, actualizada y gratuita sobre las características, tendencias y comportamiento de las principales profesiones y ocupaciones más representativas del mundo del trabajo.<br><a href="http://www.observatoriolaboral.gob.mx">http://www.observatoriolaboral.gob.mx</a> | Social | 2005 | Secretaría del trabajo y Previsión Social |
| Observatorio Laboral AEC         | Generar a la comunidad universitaria información estratégica, análisis, seguimiento y prospección del mercado de trabajo.<br><a href="http://www.observatoriolaboralaec.com/">www.observatoriolaboralaec.com/</a>                                                                                 | Social |      | Universidad Colegio Mayor de Cundinamarca |
| Observatorio Laboral y Económico | Generar información y análisis del acontecer laboral y económico del Salvador, enfocado en la mujer.<br><a href="http://observatoriolaboral.ormusa.org/">http://observatoriolaboral.ormusa.org/</a>                                                                                               | Social | 2006 | Organización de Mujeres Salvadoreñas.     |

2. REFERENCIA DE OBSERVATORIOS AMBIENTALES EN COLOMBIA

Debido a la importancia de la problemática ambiental y en aras de buscar soluciones más acertadas a la realidad y requerimientos que vive el país en temas ambientales, se han creado varios observatorios ambientales con el propósito de ser centros de investigación y conocimiento específico que contribuyen y aportan valiosa información para la toma de decisiones en los distintos niveles del sector público, los cuales se relación a continuación:

- OBSERVATORIO DE LA UNIVERSIDAD DE CALDAS

“El Observatorio de Conflictos Ambientales de la región cafetera y del centro occidente de Colombia lo lideran el área de Ecología Social del programa de Trabajo Social, el Departamento de Recursos Naturales y Medio Ambiente, organizaciones ambientalistas de la región, y está adscrito a la red Latinoamericana de Observatorios de Conflictos Ambientales cuya dirección está en Santiago de Chile en el Instituto de Ecología Política<sup>189</sup>. Tiene como objetivo general contribuir a la reducción de los daños sociales, ambientales y económicos en aquellas situaciones en las cuales la seguridad ecológica se vea amenazada por las actividades del

<sup>189</sup>[http:// www.observatorioambiental.net/que\\_es.php](http://www.observatorioambiental.net/que_es.php)

Expediente No. 25000-23-27-000-2001-0479-01  
 Acumulados Nos. 2000-0428, 2001-0122, 2001-0343  
 Actor: GUSTAVO MOYA ÁNGEL Y OTROS  
 Acción Popular

ser humano en la región del viejo Caldas y el centro occidente Colombiano"<sup>190</sup>.

#### - OBSERVATORIO DE MEDELLIN

"El Observatorio Ambiental de Medellín" es un instrumento a través del cual se conoce el estado y la calidad del ambiente de la ciudad, así como los resultados de la gestión desarrollada por varias entidades frente a problemas ambientales.

De esta manera el Observatorio se convierte en una herramienta de observación y seguimiento permanente de fenómenos, a través de 2 componentes: estadístico e investigativo. El estadístico hace referencia al proceso de recolección, procesamiento y sistematización de datos estadísticos a través de indicadores; mientras que el componente investigativo se refiere al análisis de la información recopilada, donde surgen problemáticas que merecen ser miradas a profundidad y requieren de investigaciones específicas<sup>191</sup>.

#### - OBSERVATORIO AMBIENTAL DE MANIZALES

"El Observatorio Ambiental es un sistema que permite el registro, almacenamiento, validación, monitoreo y divulgación de información principalmente de tipo estadístico. Está conformado por las dimensiones social, ambiental, económica y político institucional, además de componentes, variables e indicadores y tiene como finalidad conocer el estado ambiental urbano para favorecer su planificación participativa"<sup>192</sup>.

#### - OBSERVATORIO AMBIENTAL DE PALMIRA

El Observatorio Ambiental es un sistema que permite el registro, almacenamiento, validación, monitoreo y divulgación

<sup>190</sup> <http://www.ucaldas.edu.co/index>.

<sup>191</sup> <http://www.medellin.gov.co/irj/portal/ciudadanos?NavigationTarget=navurl://010e10b927338d6d3178fe48d2d33546>.

<sup>192</sup> <http://idea.manizales.unal.edu.co/>

**Expediente No. 25000-23-27-000-2001-0479-01**  
**Acumulados Nos. 2000-0428, 2001-0122, 2001-0343**  
**Actor: GUSTAVO MOYA ÁNGEL Y OTROS**  
**Acción Popular**

de información principalmente de tipo estadístico. Está conformado por las dimensiones social, ambiental, económica y político institucional, además de componentes, variables e indicadores y tiene como finalidad conocer el estado ambiental urbano para favorecer su planificación participativa.

En el año 2006 se consolidó la base de datos del Observatorio Ambiental de Palmira, con base en la estructura del Biomanizales, gracias al trabajo coordinado del Grupo de Estudios Ambientales Urbanos GEAUR Palmira. El software del Observatorio reposa en el IDEA de la Universidad Nacional de Colombia Sede Palmira, desde donde se realiza su actualización.

A través de la información de tipo estadístico principalmente que generan, recopilan o sistematizan instituciones del Municipio como la Alcaldía Municipal a través de la Secretarías de Salud, Hacienda, Planeación, la Coordinación de Procesos Ambientales y aquella contenida en los Instrumentos de gestión municipales como el Plan de Ordenamiento Territorial y el Plan de Gestión Integral de Residuos Sólidos; la Cámara de Comercio a través de la Fundación Progresamos y los Anuarios Estadísticos de Palmira; empresas de servicios públicos como Acuaviva y Palmaseo y a partir de cálculos propios arrojados por investigaciones coordinadas por docentes de la Universidad Nacional de Colombia Sede Palmira sobre variables estratégicas. Igualmente se revisa información de instituciones del orden regional como la CVC y del orden nacional como el Departamento Administrativo Nacional de Estadística DANE de donde se obtiene información de tipo demográfico principalmente<sup>193</sup>.

---

<sup>193</sup>[http://www.idea.palmira.unal.edu.co/paginas/proyectos/paginas/convenio\\_096/anexo16\\_boletines/boletin6.pdf](http://www.idea.palmira.unal.edu.co/paginas/proyectos/paginas/convenio_096/anexo16_boletines/boletin6.pdf)

Expediente No. 25000-23-27-000-2001-0479-01  
Acumulados Nos. 2000-0428, 2001-0122, 2001-0343  
Actor: GUSTAVO MOYA ÁNGEL Y OTROS  
Acción Popular

- OBSERVATORIO AMBIENTAL DE CALI

La Universidad Santiago de Cali está presente en la conformación del comité técnico interinstitucional para la construcción de la propuesta del Observatorio Ambiental para Cali.

El objetivo principal de este proceso corresponde a la disposición de un sistema de información sobre la situación ambiental disponible permanentemente, confiable y actualizada, evaluada sobre la base de un sistema de indicadores de la gestión ambiental, por ser la variable ambiental una componente que es transversal a los distintos sectores que tienen que ver con la calidad de la vida y el ambiente en la comunidad.

"Hacer parte de esta causa involucra el sistematizar la información necesaria relacionada con los indicadores de presión y estado ambiental de la ciudad y el municipio, que contribuya al análisis y recomendación sobre la respuesta institucional a desafíos, metas ambientales, toma de decisiones. También se debe difundir una información de alto nivel de confiabilidad e interpretación, de manera periódica, para que la comunidad puede estar mejor orientada sobre los procesos de participación en los proyectos y la gestión ambiental, lo que genera pertenencia, contextualiza y fomenta una visión integral del territorio, desarrollar habilidades de liderazgo y trabajo en equipo lo cual incrementa el compromiso del ciudadano con la ecología, además de que la comunidad se informa de que pueden mejorar en sus prácticas y como puede contribuir a la sociedad, también abre la posibilidad de difusión y mejora la comunicación a través de los medios"<sup>194</sup>

---

<sup>194</sup><http://www.usc.edu.co/noticias/index.php/iquienes-somos/822-la-usc-en-el-nuevo-observatorio-ambiental-para-cali>

Expediente No. 25000-23-27-000-2001-0479-01  
 Acumulados Nos. 2000-0428, 2001-0122, 2001-0343  
 Actor: GUSTAVO MOYA ÁNGEL Y OTROS  
 Acción Popular

- OBSERVATORIO URBANO DE CARTAGENA

El Observatorio Ambiental Urbano, surge como un instrumento del Establecimiento Público Ambiental de Cartagena, para impulsar el proceso de desarrollo urbano sostenible en el Distrito.

Por medio de éste, se pone en marcha la construcción de la información urbano-ambiental del Distrito que sirva para estimular el análisis integral dentro de los temas de discusión entre los actores pertinentes y que comparten con el establecimiento la evaluación y monitoreo de las políticas públicas urbanas para su desarrollo, como también que sirva para la concertación entre los actores sociales hacia la participación proactiva en torno a la conservación y preservación del medio ambiente urbano de la ciudad.

De otro lado, a nivel educativo se encontró que las Universidades han tomado los observatorios como una herramienta de carácter fundamental para participar en la vida activa de las decisiones del país en diferentes temas, pero en materia ambiental y a nivel del Distrito encontramos los siguientes:

- La Universidad de los Andes, cuenta con el observatorio de Justicia Ambiental -OJA- que "es un espacio de investigación-acción sobre medio ambiente y derechos humanos. Interviene en debates públicos y reformas legales con base en estudios sociales y jurídicos"<sup>195</sup>.
- La Universidad Sergio Arboleda, cuenta con "el observatorio es un espacio de divulgación de material escrito y audiovisual abierto a la comunidad académica con interés particular en apoyar a los grupos de investigación, promover conocimiento en temas

---

<sup>195</sup> <http://justiciaambientalcolombia.org/tag/observatorio-de-justicia-ambiental/>

Expediente No. 25000-23-27-000-2001-0479-01  
 Acumulados Nos. 2000-0428, 2001-0122, 2001-0343  
 Actor: GUSTAVO MOYA ÁNGEL Y OTROS  
 Acción Popular

ambientales y generar discusión sobre problemáticas ambientales actuales"<sup>196</sup>.

- **OBSERVATORIOS EN EL DISTRITO CAPITAL**

El Observatorio Ambiental de Bogotá (OAB) es un sitio web que permite conocer a través de indicadores ambientales el estado y la calidad del ambiente en Bogotá, así como los resultados de la gestión desarrollada por varias entidades del Sistema Ambiental del Distrito Capital (SIAC) frente a problemas ambientales del Distrito Capital. Es una herramienta que permite democratizar la información ambiental, dado que integra indicadores de múltiples dimensiones del desarrollo, recursos y temas de la gestión ambiental; alineándose con los principios de la Agenda XXI en el capítulo 40 "Información para la adopción de decisiones", donde se enfatiza que cada persona es a la vez usuario y portador de información, que incluye datos y el conjunto adecuado de experiencias y conocimientos"<sup>197</sup>.

- La Universidad Nacional de Colombia en Bogotá y la Dirección de Gestión del Recurso Hídrico del Ministerio de Ambiente y Desarrollo Sostenible (MADS) realizaron diferentes talleres con el propósito de diseñar el Observatorio Colombiano de Gobernanza del Agua con la participación de distintos actores sociales e institucionales, como Universidades, ONG, centros de investigación, Corporaciones Autónomas Regionales (CAR), Gobernaciones, comunidades indígenas y entidades estatales del orden nacional concurren a los talleres que se desarrollaron durante dos días en Bogotá<sup>198</sup>.

- El Observatorio Rural de Bogotá (ORB), liderado por la Secretaría Distrital de Ambiente (SDA) y la Secretaría Distrital de Planeación (SDP), nace en el marco del Plan

<sup>196</sup><http://www.usergioarboleda.edu.co/observatorio-medio-ambiente/>

<sup>197</sup><http://oab.ambientebogota.gov.co/sobreelobservatorio.shtml>

<sup>198</sup><http://www.minambiente.gov.co/contenido/contenido.aspx?catID=1372&conID=8957>

Expediente No. 25000-23-27-000-2001-0479-01  
Acumulados Nos. 2000-0428, 2001-0122, 2001-0343  
Actor: GUSTAVO MOYA ÁNGEL Y OTROS  
Acción Popular

de Gestión para el Desarrollo Rural Sostenible (PGDR), y pone al servicio de la comunidad información de calidad para apoyar el proceso de planificación y gestión del desarrollo rural del Distrito Capital, y propiciar procesos de participación asertivos que vinculen a la población en iniciativas de desarrollo sostenible. En el ORB se conoce, analiza y evalúa, a través de indicadores e información, la gestión, la planificación y el avance en los procesos de planeamiento y desarrollo sostenible de las localidades rurales, procurando aportar la información que permita identificar alternativas y abordar la solución a problemáticas de las comunidades presentes y su entorno natural.<sup>199</sup>

## 2. SITUACION DEL RÍO BOGOTÁ

La degradación en la calidad del agua del río Bogotá, como se dejó plasmado en esta providencia, el peligro permanente de pérdida del recurso hídrico y el deterioro acelerado del medio ambiente, que amenaza la seguridad ecológica de la región se debe principalmente al alto grado de contaminación orgánica y bacteriológica procedente de vertimientos de aguas residuales domésticas y por la actividad agropecuaria e industrial, a lo largo de todo el cauce del afluente.

El registro, almacenamiento, validación, monitoreo, control, evaluación, divulgación, articulación y acceso a la información ambiental en sus diferentes componentes de toda la cuenca hidrográfica del río Bogotá, resulta ser una tarea indispensable y de obligatorio cumplimiento para la autoridad de la cuenca hídrica en aras de velar por el saneamiento integral del río Bogotá y propiciar la implantación de las buenas prácticas de gestión ambiental -BPGA-, situación por la cual se propone desarrollar y ejecutar un instrumento de gestión ambiental que permita cumplir con esos fines

---

<sup>199</sup>[http://www.observatorioruralbogota.gov.co/sobre\\_observatorio.shtml](http://www.observatorioruralbogota.gov.co/sobre_observatorio.shtml)

Expediente No. 25000-23-27-000-2001-0479-01  
Acumulados Nos. 2000-0428, 2001-0122, 2001-0343  
Actor: GUSTAVO MOYA ÁNGEL Y OTROS  
Acción Popular

denominado **Observatorio Regional Ambiental y de Desarrollo Sostenible del río Bogotá -ORARBO-**.

### 3. EL OBSERVATORIO

Debemos entender el Observatorio Regional Ambiental y de Desarrollo Sostenible del Río Bogotá -ORARBO-, como un instrumento de Gestión Ambiental, pero también de fortalecimiento institucional y de cohesión social que sustenta su función en la articulación, la información, la formación, el control, la evaluación, la comunicación y la toma de decisiones de carácter ambiental, social y económico.

El Observatorio Regional Ambiental y de Desarrollo Sostenible del río Bogotá -ORARBO- es un instrumento que permite aplicar los componentes antes mencionados de todas las gestiones ambientales que se presenten a lo largo de la cuenca hídrica del río Bogotá, la cual incluye la participación en la generación y recolección de la información ambiental de todos los organismos públicos que están obligados con el buen funcionamiento del río, es decir, las entidades y autoridades nacionales, departamentales, distritales y municipales, las corporaciones autónomas Regionales, el Distrito Capital, así como las personas naturales y jurídicas que estén involucradas en esta problemática, además permite hacer un análisis y evaluación de cada una de las diferentes situaciones en materia ambiental que se presentan con el propósito de poder articular con los distintos entes la estrategia de control o mitigación que se debe adoptar, al igual que permitirá hacer una evaluación sobre el impacto socioeconómico que la misma produzca.

En este contexto, se considera de fundamental importancia la creación del Observatorio Regional Ambiental y de Desarrollo Sostenible del Río Bogotá -ORARBO-, con el propósito fundamental de profundizar en los problemas que aquejan todo

Expediente No. 25000-23-27-000-2001-0479-01  
 Acumulados Nos. 2000-0428, 2001-0122, 2001-0343  
 Actor: GUSTAVO MOYA ÁNGEL Y OTROS  
 Acción Popular

el curso de la cuenca hídrica, buscar mejores soluciones y dar total aplicación al principio de justicia ambiental entendido como "el aseguramiento de que ningún grupo social, étnico, racial, socioeconómico o de género, deba soportar una mayor carga de las consecuencias socio ambientales negativas que producen las operaciones económicas, decisiones de políticas, programas de Estado, estudios, y la ausencia u omisión de políticas relacionadas con estas temáticas, que están detrás de este tipo de emprendimientos, que se sitúan en su territorio sin su consentimiento. Se plantea una distribución igualitaria tanto de las cargas como de los beneficios relacionados con los bienes naturales; se establece entonces como un tratamiento justo y un involucramiento significativo de todas las personas por igual, promoviendo así la no vulneración de los derechos"<sup>200</sup>, el cual deberá a su vez coordinar su quehacer diario con las distintas dependencias tanto del Distrito como del departamento, los municipios, los organismo ambientales y los particulares, para:

- a) Generar un banco de datos e información de trascendencia ambiental relacionada con el Río Bogotá.
- b) Promover una articulación institucional entre los diferentes niveles de la rama ejecutiva, e invitar a participar de manera permanente y activa al sector privado interesado en los temas ambientales.
- c) Implementar herramientas de medición, control, seguimiento y evaluación que permitan identificar de manera clara y oportuna las medidas de intervención necesarias para cada problemática y promover la adopción de las buenas prácticas de gestión ambiental -BPGA-en los diferentes sectores que abarcan el río.

---

<sup>200</sup>ENCUENTRO INTERNACIONAL OBSERVATORIOS: UNA VISIÓN HACIA LAS CIUDADES, Compilador: Manuel José Amaya Arias, MEMORIA, [http://ambientebogota.gov.co/c/document\\_library](http://ambientebogota.gov.co/c/document_library).

Expediente No. 25000-23-27-000-2001-0479-01  
Acumulados Nos. 2000-0428, 2001-0122, 2001-0343  
Actor: GUSTAVO MOYA ÁNGEL Y OTROS  
Acción Popular

d) Divulgar los análisis y evaluación para permitir la adopción de mejores decisiones de carácter ambiental.

e) Divulgar y Promover una cultura ambiental, bajo la realización de programas y campañas educativos para la comunidad en general.

#### **Objetivo 10. Implementación de un Sistema Regional de Información Ambiental para la Gestión Integral de la Cuenca Hídrica del Río Bogotá - "Sigica Río Bogotá"-**

Con el propósito de cumplir con el Objetivo propuesto respecto de la creación del Observatorio Regional Ambiental y de Desarrollo Sostenible del Río Bogotá -ORARBO-, como un instrumento de Gestión Ambiental, resulta indispensable e inescindible la implementación de un Sistema Regional de Información Ambiental para la Gestión Integral de la Cuenca Hídrica del Río Bogotá - SIGICA RÍO BOGOTÁ.

##### **1. DEFINICIÓN**

El Sistema Regional de Información Ambiental para la Gestión Integral de la Cuenca Hídrica del Río Bogotá - SIGICA RÍO BOGOTÁ, deberá ser entendido como una herramienta de Gestión Integral Ambiental consistente en un software que permita el registro, almacenamiento, validación, monitoreo y divulgación de información principalmente de tipo estadístico, de toda la cuenca hídrica del Río Bogotá.

##### **2. PROPÓSITO**

La creación del Sistema Regional de Información Ambiental para la Gestión Integral de la Cuenca Hídrica del Río Bogotá - SIGICA RÍO BOGOTÁ tiene como propósito contar con datos, variables e indicadores ciertos y actualizados sobre los componentes ambiental, social, económico y político institucional de la Cuenca Hidrográfica del Río Bogotá, que

Expediente No. 25000-23-27-000-2001-0479-01  
Acumulados Nos. 2000-0428, 2001-0122, 2001-0343  
Actor: GUSTAVO MOYA ÁNGEL Y OTROS  
Acción Popular

permita a los diferentes actores de la Cuenca realizar los asuntos propios de sus competencias.

El Sistema, también, deberá aportar información que facilite el análisis y la gestión de los riesgos asociados al recurso hídrico.

En ese sentido, el Sistema Regional de Información Ambiental para la Gestión Integral de la Cuenca Hídrica del Río Bogotá deberá posibilitar:

- A la Autoridad de Cuenca y demás autoridades involucradas, tomar las decisiones necesarias y oportunas para lograr el manejo integral de la misma, toda vez que deberá proporcionar la información completa, confiable y actualizada y los indicadores sobre la condición ambiental del Río Bogotá y sobre la respuesta institucional a desafíos o metas de gestión ambiental. Además, deberá proporcionar las bases para el seguimiento y evaluación de la gestión pública de la Cuenca del Río Bogotá.
- A los Entes de Control les permitirá la evaluación y seguimiento de instrumentos como el Plan de Ordenamiento y Manejo de Cuenca del Río Bogotá - POMCA RÍO BOGOTÁ, las Buenas Prácticas de Gestión Ambiental -BPGA, el Observatorio Regional Ambiental y de Desarrollo Sostenible del río Bogotá -ORARBO-, entre otros; de las metas ambientales del Plan de Descontaminación, Rehabilitación y Restablecimiento del Río, y; del logro de las metas y compromisos adquiridos por cada entidad involucrada.
- A la comunidad, el tener acceso a información de alto nivel de confiabilidad e interpretación, para estar mejor orientada cuando deba intervenir en los procesos de participación de los proyectos y la gestión ambiental

Expediente No. 25000-23-27-000-2001-0479-01  
Acumulados Nos. 2000-0428, 2001-0122, 2001-0343  
Actor: GUSTAVO MOYA ÁNGEL Y OTROS  
Acción Popular

del territorio que compone la Cuenca Hídrica del Río Bogotá.

- A las autoridades de cada ente territorial con jurisdicción en la Cuenca, tomar decisiones respecto de actividades que tengan la potencialidad de afectar la Cuenca Hidrográfica del Río Bogotá (aprobación del uso de suelos en el POT, licencias de construcción, licencias, permisos y autorizaciones ambientales, etc.).

#### **4. COMPONENTES DEL SISTEMA REGIONAL DE INFORMACIÓN AMBIENTAL PARA LA GESTIÓN INTEGRAL DE LA CUENCA HÍDRICA DEL RÍO BOGOTÁ - SIGICA RÍO BOGOTÁ**

##### **a. Componente ambiental**

Hace referencia a toda información relativa a:

- Calidad del agua determinada con indicadores de Medición de valores como Carga Contaminante de Sólidos Suspendidos Totales (SST), Carga de Materia Orgánica o Demanda Biológica de Oxígeno(CDBO), Caudal Medio, Caudal de Agua Tratado, Nivel de Tratamiento logrado, etc.
- Monitoreo de Vertimientos
- Planes de manejo ambiental de los vertimientos de las diferentes partes de la cuenca, categorizado por actividad económica que los genera.
- Planes maestros de acueducto y alcantarillado.
- Planes de Manejo de Residuos Sólidos.
- manejo de páramos, de humedales y otros
- Identificación y caracterización de ecosistemas de importancia estratégica para la cuenca hídrica del Río Bogotá.
- Ordenación forestal y de manejo de reservas forestales.
- Indicadores de Calidad, cantidad, demanda, oferta y gestión del Recurso Hídrico en la Cuenca del Río Bogotá.

Expediente No. 25000-23-27-000-2001-0479-01  
Acumulados Nos. 2000-0428, 2001-0122, 2001-0343  
Actor: GUSTAVO MOYA ÁNGEL Y OTROS  
Acción Popular

- Y toda aquella que sea determinada por la Autoridad de Cuenca, y que resulte necesaria para la Gestión Integral de la Cuenca del Río Bogotá.

**b. Componente Social**

El componente Social del SIGICA RÍO BOGOTÁ deberá entenderse como toda información relativa a:

- Identificación de actividades económicas tradicionales que deben ser suspendidas o reubicadas.
- Identificación de alternativas productivas para los habitantes de la cuenca que desarrollan aquellas que constituyen un factor de contaminación del río.
- Planes y Estrategias de Educación ambiental.
- Y toda aquella que sea determinada por la Autoridad de Cuenca, y que sea necesaria para la Gestión Integral de la Cuenca del Río Bogotá.

**c. Componente Económico**

Es aquel relacionado con los datos, estadísticas e información concerniente a:

- Actividades económicas que se desarrollan en la Cuenca, su aporte a la economía de la región y su impacto en la calidad del agua.
- Implementación de planes de manejo ambiental en las empresas que se ubican en la cuenca.
- Costo e impacto económico de Programas de Producción Limpia.
- Y toda aquella que sea determinada por la Autoridad de Cuenca, y que sea necesaria para la Gestión Integral de la Cuenca del Río Bogotá.

**d. Componente Política Institucional**

Expediente No. 25000-23-27-000-2001-0479-01  
Acumulados Nos. 2000-0428, 2001-0122, 2001-0343  
Actor: GUSTAVO MOYA ÁNGEL Y OTROS  
Acción Popular

Contendrá los indicadores, estadísticas, datos e información relevante relativa, entre otras, a:

- Las Plantas de Tratamiento: funcionamiento, personal capacitado en cada ente territorial para este aspecto, recursos, mantenimiento y resultados de gestión con base en los indicadores previamente establecidos y exigidos por la Autoridad de Cuenca.
- Planes de Ordenamiento Territorial: que permitan establecer el uso de suelos en los municipios ribereños de la Cuenca.
- Acueductos y Saneamiento Básico: redes, funcionamiento, tarifas, cobertura y tratamiento de aguas residuales.
- Actos administrativos de cada entidad con autoridad o influencia en la Cuenca, que afecten la gestión de la misma.
- Procesos sancionatorios ambientales relativos a la cuenca. Gestión de las Autoridades Ambientales que tienen jurisdicción en la cuenca. (Plan de visitas de control y seguimiento, datos de monitoreo de calidad de agua, monitoreo de vertimientos, procesos sancionatorios y sanciones impuestas, licencias, autorizaciones y permisos para el desarrollo de actividades que tengan la potencialidad o que realmente afecten la Cuenca.)
- Y toda aquella que sea determinada por la Autoridad de Cuenca, y que sea necesaria para la Gestión Integral de la Cuenca del Río Bogotá.

Expediente No. 25000-23-27-000-2001-0479-01  
Acumulados Nos. 2000-0428, 2001-0122, 2001-0343  
Actor: GUSTAVO MOYA ÁNGEL Y OTROS  
Acción Popular

**5. ENTIDADES QUE CONFORMAN EL SISTEMA REGIONAL DE INFORMACIÓN PARA LA GESTIÓN INTEGRAL DE LA CUENCA HÍDRICA DEL RÍO BOGOTÁ - SIGICA RÍO BOGOTÁ**

El Sistema Regional de Información para la Gestión Integral de la Cuenca Hídrica del Río Bogotá - SIGICA RÍO BOGOTÁ, se conformará con la información que deberán aportar, por el ejercicio de sus competencias y en razón de ellas, las siguientes entidades que tienen influencia o jurisdicción en la Cuenca Hidrográfica del Río Bogotá:

**Ministerio de Ambiente y Desarrollo Sostenible -MADS-**

El MADS, en su condición de organismo rector de la gestión del medio ambiente y de los recursos naturales renovables en Colombia, deberá aportar la información, estadísticas y datos que maneje, en razón de sus competencias, que hagan referencia a la Cuenca Hídrica del Río Bogotá.

Deberá gestionar su implementación y garantizar sus sostenibilidad y la confiabilidad de sus datos.

**Departamento Nacional de Planeación - DNP -**

El Departamento Nacional de Planeación tiene como objetivos fundamentales la preparación, el seguimiento de la ejecución y la evaluación de resultados de las políticas, planes generales, programas y proyectos del sector público y el diseño de las políticas en materia de macro estructura del Estado.

Deberá proveer al SIGICA todos los datos, estadísticas, indicadores y demás información que maneje, en razón del ejercicio de sus competencias, relacionada con asuntos que afecten la cuenca hidrográfica del Río Bogotá, en especial.

Expediente No. 25000-23-27-000-2001-0479-01  
Acumulados Nos. 2000-0428, 2001-0122, 2001-0343  
Actor: GUSTAVO MOYA ÁNGEL Y OTROS  
Acción Popular

**Corporación Autónoma Regional y de Desarrollo Sostenible de  
Cundinamarca –CAR–**

La CAR en su condición de Autoridad Ambiental en gran parte de la cuenca hidrográfica del Río Bogotá, deberá proveer, como mínimo, información al SIGICA respecto de:

- La implementación, seguimiento y control del cumplimiento de los diferentes instrumentos de gestión de la Cuenca.
- El monitoreo de vertimientos.
- Los Indicadores del Recurso Hídrico respecto de la Cuenca Hidrográfica del Río Bogotá.
- Plantas de Tratamiento que estén vinculadas a la cuenca del Río Bogotá.
- Procesos sancionatorios ambientales como consecuencia de la contaminación de la cuenca.
- Tarifas de uso de agua de la cuenca y tasas de compensación.
- Permisos, licencias, autorizaciones y concesiones ambientales otorgadas para realizar actividades que tengan impacto en la cuenca hídrica del Río Bogotá.
- Límites permisibles de emisión, descarga, transporte o depósito de sustancias, productos, compuestos o cualquier otra materia que puedan afectar la cuenca hidrográfica del Río Bogotá.
- Indicadores de gestión respecto de sus funciones de evaluación, control y seguimiento ambiental de las actividades de exploración, explotación, beneficio, transporte, uso y depósito de los recursos naturales no renovables que afecten la cuenca hidrográfica del Río Bogotá.
- Y toda aquella que determine la Autoridad de Cuenca y que resulte necesaria para el SIGICA.

**Departamento de Cundinamarca**

A través de la entidad encargada del manejo ambiental del ente territorial, deberá reportar la información con la que

Expediente No. 25000-23-27-000-2001-0479-01  
Acumulados Nos. 2000-0428, 2001-0122, 2001-0343  
Actor: GUSTAVO MOYA ÁNGEL Y OTROS  
Acción Popular

cuenta y que determine la Autoridad de Cuenca, que sea necesaria para lograr los objetivos del SIGICA RÍO BOGOTÁ.

#### **Distrito Capital - Secretaría Distrital de Ambiente**

El Distrito Capital, a través de la Secretaría Distrital de Ambiente, en su calidad de Autoridad Ambiental del Distrito Capital, deberá respecto de la parte de la cuenca del Río Bogotá que se encuentra en su jurisdicción, aportar al SIGICA, lo siguiente:

- La implementación, seguimiento y control del cumplimiento de los diferentes instrumentos de gestión de la Cuenca.
- El monitoreo de vertimientos en la zona urbana del Distrito Capital.
- Los Indicadores del Recurso Hídrico respecto de la Cuenca Hidrográfica del Río Bogotá, en su jurisdicción.
- Plantas de Tratamiento que estén vinculadas a la cuenca del Río Bogotá en el territorio de su jurisdicción.
- Procesos sancionatorios ambientales como consecuencia de la contaminación de la cuenca.
- Tarifas de uso de agua de la cuenca y tasas de compensación.
- Permisos, licencias, autorizaciones y concesiones ambientales otorgadas para realizar actividades que tengan impacto en la cuenca hídrica del Río Bogotá.
- Límites permisibles de emisión, descarga, transporte o depósito de sustancias, productos, compuestos o cualquier otra materia que puedan afectar la cuenca hidrográfica del Río Bogotá.
- **Indicadores de gestión respecto de sus** funciones de evaluación, control y seguimiento ambiental de las actividades de exploración, explotación, beneficio, transporte, uso y depósito de los recursos naturales no renovables que afecten la cuenca hidrográfica del Río Bogotá.

Expediente No. 25000-23-27-000-2001-0479-01  
 Acumulados Nos. 2000-0428, 2001-0122, 2001-0343  
 Actor: GUSTAVO MOYA ÁNGEL Y OTROS  
 Acción Popular

- Y toda aquella que determine la Autoridad de Cuenca y que resulte necesaria para el SIGICA.

#### **Empresa de Acueducto y Alcantarillado de Bogotá**

La Empresa de Acueducto y Alcantarillado de Bogotá, es la encargada de proveer el agua potable a la Capital, y del funcionamiento y mantenimiento de la red de saneamiento básico.

En tal virtud, deberá aportar la información relativa a:

- El monitoreo de vertimientos.
- Plantas de Tratamiento que estén vinculadas a la cuenca del Río Bogotá.
- Y toda aquella que determine la Autoridad de Cuenca y que resulte necesaria para el SIGICA.

#### **CODENSA - EMGESA**

- Indicadores de gestión en la descontaminación y recuperación del cuerpo hídrico del embalse del Muña.
- Indicadores del recurso hídrico respecto del Embalse del Muña.
- Inversión de recursos en la descontaminación del Río Bogotá.
- Y toda aquella que determine la Autoridad de Cuenca y que resulte necesaria para el SIGICA.

#### **Municipios**

- Gestión ambiental del municipio respecto de la Cuenca del Río Bogotá.
- Planes de Ordenamiento Territorial
- Licencias de construcción
- Y toda aquella que determine la Autoridad de Cuenca y que resulte necesaria para el SIGICA.

Expediente No. 25000-23-27-000-2001-0479-01  
Acumulados Nos. 2000-0428, 2001-0122, 2001-0343  
Actor: GUSTAVO MOYA ÁNGEL Y OTROS  
Acción Popular

**Instituto de Estudios Ambientales y Meteorología - IDEAM:**

- Indicadores hídricos de la cuenca.
- Gestión del riesgo ambiental.
- Y toda aquella que determine la Autoridad de Cuenca y que resulte necesaria para el SIGICA.

Expediente No. 25000-23-27-000-2001-0479-01  
Acumulados Nos. 2000-0428, 2001-0122, 2001-0343  
Actor: GUSTAVO MOYA ÁNGEL Y OTROS  
Acción Popular

#### I.4.4. COMPONENTE II

##### ARTICULACIÓN Y COORDINACIÓN INSTITUCIONAL E INTERSECTORIAL

###### I.4.4.1 NECESIDAD DE UN ENTE DE ARTICULACIÓN Y COORDINACIÓN

Una vez estudiada la problemática de la Cuenca del Río Bogotá desde una concepción sistémica derivada del análisis realizado en el tema institucional, se concluye la necesidad de buscar una alternativa diferente a los mecanismos y espacios actualmente existentes.

Ciertamente, la contaminación del Río Bogotá es un problema que abarca un área extensa, afecta a un buen número de habitantes de Bogotá, Soacha y demás municipios de la cuenca en el Departamento de Cundinamarca, como también al río más importante del país, ya que la carga contaminante desemboca en el Río Magdalena, y de allí en adelante incide de manera negativa sobre la población y los ecosistemas. Esta situación impone la necesidad de que todas las entidades que de una u otra forman intervienen en la protección y el saneamiento del río, coordinen sus funciones para lograr acciones concretas que permitan su recuperación.

Existe una gran necesidad de avance definido y preciso de una gestión integral en el corto y mediano plazo, que contribuya a mejorar la calidad de vida de los Bogotanos y los habitantes de las cuencas alta, media y baja, para ello las partes involucradas en el tema, deben contribuir con recursos humanos, logísticos y financieros oportunos con el fin de garantizar una acción efectiva y eficaz.

Existe una competencia interinstitucional múltiple: el Ministerio de Ambiente y Desarrollo Sostenible, el Ministerio de Minas y Energía, el Ministerio de Educación Nacional, entre otros, la Alcaldía Mayor de Bogotá - Secretaría Distrital de Salud, la Empresa de Acueducto y Alcantarillado

Expediente No. 25000-23-27-000-2001-0479-01  
Acumulados Nos. 2000-0428, 2001-0122, 2001-0343  
Actor: GUSTAVO MOYA ÁNGEL Y OTROS  
Acción Popular

de Bogotá E.A.A.B., la Corporación Autónoma Regional de Cundinamarca - CAR, y los municipios que se encuentran en la ronda del Río Bogotá, sobre los cuales recae la responsabilidad institucional del saneamiento de la cuenca, con superposición de funciones que dan lugar a conflictos, que se traducen en problemas de comunicación abierta y por lo tanto, requieren soluciones conjuntas.

Es necesario, en un proyecto de esta magnitud, que implica un gran flujo de recursos y acciones planificadas y coordinadas en el mediano y largo plazo, generar una mayor agilidad operativa que garantice su ejecución completa logrando los objetivos propuestos en el menor tiempo posible, para evitar sobre costos.

La dimensión de los proyectos de infraestructura y el tiempo real de ejecución de los mismos rebasan la capacidad de las entidades públicas involucradas, por lo tanto, se requiere una articulación interinstitucional que permita manejar intereses comunes, de manera que se logren beneficios para todos en el cumplimiento de objetivos y metas en torno al saneamiento del Río Bogotá. Ello requiere de un lado, de una clara voluntad política de las autoridades locales y regionales, y de otro un fuerte compromiso de los funcionarios del más alto nivel de las entidades responsables.

Aunque existe multiplicidad de espacios y mecanismos de concertación y acción interinstitucional creados en el pasado para abordar el problema, estos no evidencian realmente procesos de colaboración efectiva que faciliten y agilicen la continuación del proceso de Saneamiento del Río Bogotá.

En estos términos, se hace necesario implementar, a través de esta sentencia un instrumento articulador de los entes que tienen participación en la gestión de la cuenca hidrográfica como sistema para su recuperación integral, con enfoque de

Expediente No. 25000-23-27-000-2001-0479-01  
Acumulados Nos. 2000-0428, 2001-0122, 2001-0343  
Actor: GUSTAVO MOYA ÁNGEL Y OTROS  
Acción Popular

sostenibilidad, adaptación al cambio climático, en atención al crecimiento de la población, los cambios demográficos, la urbanización, la creciente demanda de alimentos y, en general, los intereses sociales, económicos y ambientales.

Igualmente, se requiere establecer un sistema administrativo en el ámbito de la Cuenca del Río Bogotá, a través de una concepción integral de la normatividad, planificación y ordenamiento territorial, así como la canalización de recursos seguimiento de su origen, recaudo, inversión y ejecución; la reglamentación para otorgar concesiones, la protección de la fuente hídrica y de las zonas estratégicas para su mantenimiento, las restricciones a la propiedad privada y los incentivos a la prestación de los servicios ambientales, así como los subsidios focalizados, el tema del caudal ecológico, de las tasas por uso y retributivas, del régimen para aguas subterráneas y marinas, entre otros.

Se pretende, en estos términos, una buena gobernanza a través de la integración normativa y los acuerdos institucionales efectivos para la adopción de decisiones equitativas y sostenibles, así como una adecuada infraestructura hídrica para la obtención de productos y servicios.

Este instrumento que la Sala ha considerado denominar GERENCIA ESTRATÉGICA DE CUENCA debe actuar con un enfoque holístico; económicamente eficiente, autosostenible, competitivo y que trascienda en el tiempo. Esta última necesidad se ha revalorizado en forma reciente al percatarse el hombre que muchos de sus llamados avances, sobre todo en materia de transformación productiva, se encuentran descompensados por los daños ocasionados en el ambiente. Debe estar compuesta de reglas básicas, principios de organización y procedimientos fundamentales.

Los costos de los efectos externos o "externalidades" negativas, como la contaminación producida por el uso del

Expediente No. 25000-23-27-000-2001-0479-01  
Acumulados Nos. 2000-0428, 2001-0122, 2001-0343  
Actor: GUSTAVO MOYA ÁNGEL Y OTROS  
Acción Popular

agua como medio de transporte de desechos, en definitiva ha de ser "*internalizado*" de acuerdo con el principio según el cual "*el que contamina paga*".

#### I.4.4.2. PRINCIPIOS ORIENTADORES DE LOS PROCESOS DE ARTICULACIÓN Y COORDINACIÓN

Un proceso de ordenación concebido para las cuencas hidrográficas en Colombia debe estar orientado por unos principios que sean comunes a cualquier ejercicio de planificación. En este sentido se han definido los principios orientadores que rigen los procesos de ordenación de cuencas en el país y que deben ser tenidos en cuenta en la formulación de los Planes de Ordenación y Manejo de Cuencas Hidrográficas - POMCH -. En este sentido, se tienen los siguientes:

*Principio 1: Construcción local de lo regional, con visión nacional y solidaridad global.*

La ordenación de cuencas es un proceso que debe ser construido de "*abajo hacia arriba*" sin descuidar los escenarios regionales y nacionales que prefiguran la construcción de territorio, además abandonar las visiones globales que privilegian la articulación entre los diferentes niveles y que generan capacidad institucional para el cumplimiento de las metas de desarrollo sostenible.

*Principio 2: Proceso permanente de participación, concertación, planeación, ejecución, seguimiento y ajuste con todos los actores.*

Este principio propicia la participación de los diferentes actores en todas las fases de la ordenación, y parte de un análisis de los mismos, en el cual se identifican los diversos intereses para que estos se releven en el proceso de planificación.

Expediente No. 25000-23-27-000-2001-0479-01  
Acumulados Nos. 2000-0428, 2001-0122, 2001-0343  
Actor: GUSTAVO MOYA ÁNGEL Y OTROS  
Acción Popular

*Principio 3: Enfoque sistémico y gestión integral*

Se reconoce una visión de contexto en la comprensión de la relación sociedad-naturaleza para orientar acciones conducentes a la ordenación de cuencas. La gestión integral constituye de esta manera un proceso dinámico relacionado con los complejos sistemas representados por las cuencas hidrográficas, orientada a la toma de decisiones sobre el uso y manejo integral del agua.

La gestión va precedida de la planificación, y esta a su vez tiene como pre-requisito la evaluación, que abarca, tanto las dinámicas de oferta y demanda del recurso hídrico como la situación del uso del suelo y aspectos medio ambientales.

Subyace a este principio el reconocimiento del ciclo hidrológico como referente conceptual del proceso de gestión integrada y, en este sentido, la noción de cuenca desde su concepción física que abarca la dinámica de las aguas en sus diferentes estados y espacios: atmosférico, superficial y subterráneo.

*Principio 4: Construcción articulada, compartida y transparente de la información y del conocimiento.*

La optimización de los datos recolectados, el flujo de información procesada y el conocimiento generado en gracia a este principio, se convierte en un instrumento de democracia que fundamenta la toma de decisiones.

*Principio 5: Equidad social en el acceso a los recursos naturales y respeto al patrimonio cultural y natural.*

Garantiza el aprovechamiento seguro y sostenible del patrimonio cultural a todos los usuarios (para diversos usos), aunque subsistan diferencias considerables entre los grupos de usuarios respecto de su capacidad de pago. Si bien el cobro volumétrico del costo completo puede ser apropiado para muchos, y deseable por razones de una distribución eficiente, quizás sea necesario efectuar una provisión

Expediente No. 25000-23-27-000-2001-0479-01  
 Acumulados Nos. 2000-0428, 2001-0122, 2001-0343  
 Actor: GUSTAVO MOYA ÁNGEL Y OTROS  
 Acción Popular

especial para la población de escasos ingresos. Este principio además tiene que ver con el reconocimiento y consideración de ecosistemas de manejo especial y patrimonio cultural en los planes de ordenación.

*Principio 6: Convivencia y competitividad sostenible*

Este principio se refiere a la necesidad de mantener un equilibrio de estructura y función entre todos los elementos del sistema natural para garantizar su sostenibilidad. Supone armonizar intereses socio económicos y culturales con la base natural que ofrecen los ecosistemas y particularmente la cuenca hidrográfica.

*Principio 7: Articulación con los planes de ordenamiento territorial, planes de vida, planes de desarrollo etnocultural, planes de desarrollo y expansión sectorial (Armonización -Retomar elementos texto principios de Ley 99/93)*

En el enfoque sistémico es necesario articular normas, planes, estrategias e instrumentos para superar conflictos generados en visiones parciales y desconocimiento del orden jurídico administrativo, político e institucional.<sup>201</sup>

---

<sup>201</sup>Vale la pena recordar que estos principios acordados colectivamente recogen las recomendaciones de la "Conferencia Internacional sobre el Agua y el Medio Ambiente" realizada en Dublín en 1992, en la cual se recalca que "la gestión eficaz establece una relación entre el suelo y el aprovechamiento del agua en la totalidad de una cuenca hidrológica o un acuífero" y que "la unidad geográfica mas apropiada para la planificación y gestión de los recursos hídricos es la cuenca fluvial", así como, en la Conferencia de las Naciones Unidas sobre el Medio Ambiente y el Desarrollo (1992) en la cual se enfatizó que "la ordenación integrada de los recursos hídricos, incluida la integración de los aspectos relativos a las tierras y a las aguas, tendría que hacerse a nivel de cuenca o subcuenca de captación" y que "la compleja interconexión de los sistemas de agua dulce exigen una ordenación global de dichos recursos (basados en la ordenación de las cuencas hidrográficas)".

A su vez la mas reciente "Conferencia Internacional sobre el Agua Dulce: El Agua una de las Claves del Desarrollo Sostenible" (Bonn, Alemania. 2001) en la que se destaca que "las cuencas hidrográficas, las cuencas fluviales, los lagos y los acuíferos deben ser el marco de referencia primario para la gestión de recursos hídricos y que "es preciso crear mecanismos institucionales y participativos a este nivel". Estos principios son concordantes además con el espíritu del documento "Manejo Integrado de Recursos Hídricos" del Global WaterPartnership (Estocolmo, Septiembre de 2000) debatidos en el III Foro Mundial del Agua

Expediente No. 25000-23-27-000-2001-0479-01  
 Acumulados Nos. 2000-0428, 2001-0122, 2001-0343  
 Actor: GUSTAVO MOYA ÁNGEL Y OTROS  
 Acción Popular

#### I.4.4.3. JUSTIFICACIÓN DE UN ENTE DE ARTICULACIÓN Y COORDINACIÓN

Los estudios adelantados por la CEPAL han precisado algunas razones por las cuales se justifica crear una autoridad de cuenca, de los cuales cabe destacar para el caso de la cuenca del río Bogotá:

**"Creciente competencia por el uso del recurso agua,** competencia que solo se puede evitar conciliando los intereses de los usuarios mediante un manejo integral del recurso en cada cuenca o sistema hídrico. (...) no es sólo por la cantidad de agua como lo fuera por muchos años, sino también por la calidad del recurso, su oportunidad y lugar. La necesidad de preservar, proteger y en general conservar el medio ambiente es actualmente uno de los motivos más importantes para considerar a las cuencas como territorio de gestión.

**Expansión de la ocupación del territorio por parte del hombre.** Esta competencia, así como la pobreza, la ignorancia y la falta de planes de ordenamiento del uso del territorio debidamente aplicados, han empujado al ser humano a ocupar zonas inundables y zonas de deslizamiento y a asentar grandes urbes en zonas con gran escasez de agua. Además la falta de organización lo induce a destruir las cuencas de captación de agua, a sobreexplotar los recursos de agua subterránea y eliminar las fuentes de recarga, a utilizar los cauces como basurales y otras actitudes similares.

Cada sector forzosamente debe trabajar en coordinación con otros sectores en cada cuenca si desean tener éxito en su gestión (...)

**La expansión de la variedad de usuarios del agua y su mayor poder de negociación.** Por ejemplo el advenimiento de las explotaciones piscícolas, tanto en ríos, lagos como en estuarios (acuicultura), ha generado una fuerte imposición para manejar las cuencas de captación. Lo mismo sucede con las cuencas en las cuales se han construido represas y que reciben sedimentos en exceso, por lo que las empresas administradoras de estos embalses se ven obligados a realizar planes de control de erosión.

**La gravedad creciente del impacto de los fenómenos naturales extremos** como sequías, inundaciones y grandes deslizamientos, han obligado que los sectores

Expediente No. 25000-23-27-000-2001-0479-01  
 Acumulados Nos. 2000-0428, 2001-0122, 2001-0343  
 Actor: GUSTAVO MOYA ÁNGEL Y OTROS  
 Acción Popular

usuarios, que antes trabajaban aislados, deban aunar esfuerzos en cuencas para ejecutar trabajos de regulación que los beneficien en conjunto, repartiéndose los costos en forma proporcional a los beneficios que reciben cada uno"<sup>202</sup>.

#### I.4.4.4. OBJETIVOS DEL ENTE DE ARTICULACIÓN Y COORDINACIÓN

Con el fin de aunar esfuerzos institucionales para la integración sistémica y la construcción colectiva, dentro del marco competencial de las entidades públicas y autoridades ambientales del orden nacional, departamental, regional, municipal y distrital, respetando la autonomía de cada una de ellas, con la participación de la sociedad y sus distintos actores, acorde con las normas y recursos, se busca la creación e implementación de un ente articulador y de coordinación que dirija y gestione de manera integral la Cuenca hidrográfica. Como objetivos específicos podemos encontrar:

1.- Armonizar el progreso económico y social con la calidad ambiental y sanitaria de la cuenca hidrográfica y lograr la inclusión de la cuenca como marco de planificación integral en la jurisdicción territorial de influencia.

2.- Priorizar la ejecución de los proyectos de las autoridades ambientales, alcaldes, incluido el del Distrito Capital y el Departamento, así como la administración y el seguimiento de los recursos financieros destinados para la cuenca.

3.- Comprometer a todos los estamentos públicos y privados en esta tarea de conservación del agua y lograr la concientización en el manejo integral de la cuenca hidrográfica del río Bogotá, a través de la celebración de

---

<sup>202</sup>C E P A L, Comisión Económica para América Latina y el Caribe, POLITICAS PUBLICAS PARA EL DESARROLLO SUSTENTABLE: LA GESTION INTEGRADA DE CUENCAS, elaborado por la División de Recursos Naturales y Energía para el Segundo Congreso Latinoamericano de Cuencas Hidrográficas, a realizarse en Mérida, Venezuela, 6 al 10 de noviembre de 1994.

Expediente No. 25000-23-27-000-2001-0479-01  
Acumulados Nos. 2000-0428, 2001-0122, 2001-0343  
Actor: GUSTAVO MOYA ÁNGEL Y OTROS  
Acción Popular

acuerdos, convenios y otros mecanismos de cooperación con entidades privadas u organismos internacionales.

4.- Lograr que los proyectos, planes y programas que se desarrollen dentro de la política de recuperación integral de la Cuenca del río Bogotá, sean financiados con los recursos oportunamente recaudados y debidamente administrados provenientes del orden nacional, departamental y municipal, así como con las contribuciones por valorización, préstamos internos y externos, donaciones y aportes de las empresas.

5.- Establecer mecanismos de medición y monitoreo, de acuerdo con la priorización de necesidades, frente a la ejecución de los proyectos, planes y programas y los recursos que los financien, y poder definir los indicadores de gestión y de resultado, para lograr su sostenibilidad.

6.- Contar con un equipo técnico para elaborar estándares y especificaciones técnicas para orientar las actividades de gestión de aguas compartidas.

7.- Promover, educar y asistir para el mejoramiento de la capacidad de los usuarios para administrar los sistemas de la cuenca alta, media y baja del río Bogotá.

8.- Buscar los mecanismos e instrumentos para fomentar la participación del sector privado en la gestión y aprovechamiento del agua.

9.- Construir un sistema de información dinámico.

10.- Elaborar análisis respecto de la aplicación de las tarifas y su cobro respecto de los subsidios, así como del cobro de las tasas retributivas y su efectividad.

11.- Lograr concentrar los recursos y hacer más efectiva su ejecución.

Expediente No. 25000-23-27-000-2001-0479-01  
Acumulados Nos. 2000-0428, 2001-0122, 2001-0343  
Actor: GUSTAVO MOYA ÁNGEL Y OTROS  
Acción Popular

12.- Establecer mecanismos de participación comunitaria en procesos de veeduría y programas educativos.

#### I.4.4.5. FUNDAMENTO NORMATIVO DEL ENTE DE ARTICULACIÓN Y COORDINACIÓN

Con la expedición de la Constitución Política de 1991, se institucionalizaron bases legales que instrumentalizan políticas de intervención del Estado sobre el ordenamiento territorial existente. La Carta Política plantea de esta forma la necesidad de promover el ordenamiento del territorio, el uso equitativo y racional del suelo y la preservación y defensa del patrimonio ecológico y cultural del país.

En estos términos la Carta Política consagra la institucionalidad ambiental cuyo desarrollo se produce con la expedición de la Ley 99 de 1993, que crea el Ministerio del Medio Ambiente, el Sistema Nacional Ambiental y reorganiza el sector público encargado de la gestión ambiental.

Esta normativa permite la expedición de una serie de políticas en materia ambiental en temas como biodiversidad, bosques, agua, ordenamiento territorial, saneamiento ambiental, población, participación, etc.

Cabe destacar la **Política para el Manejo Integral del Agua** (Minambiente, 1996), la cual hace énfasis en el manejo sostenible de la oferta de agua, acorde con los requerimientos sociales y económicos; considerando la cantidad, la calidad y la distribución espacial y temporal del recurso. En este sentido, señala la necesidad de adelantar actividades de ordenación y planificación de cuencas hidrográficas, como lo describe el Ministerio: *"La gestión ambiental del recurso hídrico, debe abordar el manejo y solución integral de los problemas ambientales relacionados con la disponibilidad y calidad del agua en una región*

Expediente No. 25000-23-27-000-2001-0479-01  
Acumulados Nos. 2000-0428, 2001-0122, 2001-0343  
Actor: GUSTAVO MOYA ÁNGEL Y OTROS  
Acción Popular

*determinada, mediante el uso selectivo y combinado de herramientas jurídicas, de planeación, técnicas, económicas, financieras y administrativas, orientadas por diversas estrategias de gestión que responden a una política ambiental nacional para el manejo integral del agua; y que garanticen la sostenibilidad del recurso para las generaciones futuras".*

Bajo este contexto y con el fin de armonizar las regulaciones establecidas en los Códigos de Recursos Naturales y Sanitario, con los principios normativos ambientales señalados en la Ley 99 de 1993, y los diferentes instrumentos de política, el Ministerio del Medio Ambiente expide una serie de regulaciones en torno al tema de agua dentro de las que se desatacan el **Decreto 1729 de 2002** que establece las **finalidades, principios y directrices de la Ordenación de Cuencas** en el país, el **Decreto 1604 de 2002** que reglamenta las comisiones conjuntas y más recientemente el **Decreto 1640 de 2012**.

En otras materias, el período se caracteriza por la expedición de diferentes instrumentos normativos relacionados con la gestión del agua, dentro de los que se destacan los relativos a la regulación y el financiamiento. En este sentido se avanza en la reglamentación de las tasas por uso definidas por la Ley 99 de 1993 y reglamentadas en el Decreto 155 de 2004, así como en las tasas retributivas vigentes desde el Código de Recursos naturales (Decreto Ley 2811 de 1974) y reglamentadas en el Decreto 3100 de 2003. Por otro lado, en materia de financiamiento se emiten instrumentos orientados a la subvención de los planes de ordenación de cuencas hidrográficas.

La Ley 152 de 1994, "*por la cual se establece la Ley Orgánica del Plan de Desarrollo*", dispone que la gestión regional debe ser coherente y armónica entre las autoridades e instancias del orden nacional, regional y las entidades territoriales para lo cual se requiere construir el Plan de Gestión

Expediente No. 25000-23-27-000-2001-0479-01  
Acumulados Nos. 2000-0428, 2001-0122, 2001-0343  
Actor: GUSTAVO MOYA ÁNGEL Y OTROS  
Acción Popular

Ambiental Regional -PGAR, con el objeto de lograr la planificación de ciudad región Bogotá-Cundinamarca, la formulación de planes departamentales y municipales y nuevos Planes de Ordenamiento Territorial.

En estos términos se expidió el Decreto 1200 de 2004, en el cual se orienta la planificación regional y se esbozan los principios que la rigen como armonía regional, gradación normativa y rigor subsidiario, concordancia y articulación entre los diferentes instrumentos de Planeación del Estado e integralidad.

**Igualmente,** se debe contar con los instrumentos de planeación: POMCA (Planes de ordenamiento y manejo de cuencas hidráulicas), PGAR (Plan de gestión ambiental regional) y los planes de ordenamiento territorial -POT, así como los demás planes de acción que expida la autoridad ambiental.

De conformidad con la Política Nacional para la Gestión del recurso Hídrico, expedida por el Ministerio de Ambiente, Vivienda y Desarrollo Sostenible, producto del Plan Nacional de Desarrollo 2006-2010 se incorporó por primera vez una competencia específica integrada del recurso hídrico y se propuso la política, para lo cual se dispuso la priorización nacional de cuencas, a través del Decreto 1480 de 2007, modificar el Decreto 1729 de 2002 y revisar el decreto 1594 de 1984.

En este sentido destaca la política, que acorde con el informe del Estado de los Recursos Naturales y del Ambiente 2007-2008, de la Contraloría General de la República, persiste ***"una débil articulación institucional que impide dinamizar el proceso de planificación del recurso hídrico y, por tal razón, no se cuenta con información actualizada que permita ajustar los planes, programas y proyectos. Se requiere, por lo tanto mejorar el conocimiento en aspectos sociales y económicos (comportamiento poblacional, educación,***

Expediente No. 25000-23-27-000-2001-0479-01  
Acumulados Nos. 2000-0428, 2001-0122, 2001-0343  
Actor: GUSTAVO MOYA ÁNGEL Y OTROS  
Acción Popular

*tenencia de la tierra, uso del suelo, distribución predial, actividades económicas), cartográficos (mejoramiento de la escala, predial, catastral, áreas homogéneas) y ambientales (oferta, concesiones, vertimientos, tasas, calidad)."*

De otra parte, la Política destaca que en materia de conflictos más frecuentes en las cuencas se encuentran los relacionados con el uso del suelo, seguidos por los conflictos de calidad, y cantidad de agua y adicionalmente por las diferencias en la visión, desconocimiento de las competencias y normativa, diferencias en la priorización de problemas por parte de las autoridades ambientales y dificultades en el acceso a la información por parte de las diferentes instituciones que inciden en el manejo de los recursos sobre las cuencas.

Se destaca así la necesidad de articular y hacer coherente la implementación de las diferentes normas y políticas, así como la urgencia de disponer y articular recursos tanto financieros como humanos destinados a la gestión integral del recurso hídrico, para adelantar procesos que puedan contribuir a la prevención y manejo de conflictos.

#### **I.4.4.5. CREACIÓN DE LA GERENCIA ESTRATÉGICA PARA LA CUENCA HIDROGRÁFICA**

La Constitución Ecológica y sus desarrollos legislativos han establecido una transversalidad en el manejo, control y vigilancia de los recursos naturales en múltiples autoridades del orden nacional, departamental, municipal y regional lo que ha generado que ninguna autoridad quiera asumir como corresponde sus obligaciones en materia ambiental.

No hay duda que se han realizado numerosos esfuerzos especialmente a través de documentos CONPES, los cuales no han evolucionado ni han tenido el seguimiento requerido, así contamos con el CONPES 3320 "Estrategia para el manejo

Expediente No. 25000-23-27-000-2001-0479-01  
Acumulados Nos. 2000-0428, 2001-0122, 2001-0343  
Actor: GUSTAVO MOYA ÁNGEL Y OTROS  
Acción Popular

ambiental del río Bogotá", CONPES 3177 "Acciones Prioritarias y lineamientos para la formulación del Plan Nacional de Manejo de Aguas Residuales", que priorizó la Cuenca del Río Bogotá como crítica por contaminación hídrica en el país.

Igualmente la Cuenca del Río Bogotá ha sido priorizada tanto en el Plan Nacional de Desarrollo 2006-2010, adoptado mediante Ley 1151 de 2007, como en el Plan Nacional de Desarrollo 2010-2014, adoptado mediante Ley 1450 de 2011.

En el Primer encuentro por el agua celebrado el 1º de noviembre de 2012, el IDEAM planteó que en Colombia el problema del agua no se suscribe a la disponibilidad del recurso sino a su administración, a su gobernabilidad<sup>203</sup>.

De acuerdo con el Departamento Nacional de Planeación (2003, en la Región Bogotá - Sabana no se ha logrado generar una estructura regional coordinada e integral para tratar temas comunes, como lo demuestra la fragmentación de los proyectos viales, de transporte y de saneamiento, situación que se ha mantenido hasta el presente.

Según se anota en el documento del profesor Guhl, julio 2013, *"Los autores presentan tres razones claves para elegir la cuenca como una unidad de gestión territorial: 1) Las características físicas del agua generan un grado extremadamente alto, y en muchos casos imprevisible, de interrelación e interdependencia entre los usos y usuarios de agua en una cuenca; 2) Las cuencas constituyen el área en donde interactúan, en un proceso permanente y dinámico, el agua con los sistemas abiótico y biótico y 3) En las cuencas se produce la interrelación e interdependencia entre los sistemas abióticos y bióticos, y el sistema socioeconómico, formado por los usuarios de las cuencas, sean habitantes o interventores externos."*

---

<sup>203</sup>El Espectador, jueves 7 de noviembre de 2013, p. 24.

Expediente No. 25000-23-27-000-2001-0479-01  
Acumulados Nos. 2000-0428, 2001-0122, 2001-0343  
Actor: GUSTAVO MOYA ÁNGEL Y OTROS  
Acción Popular

*Así, agrega "El agua en la cuenca interconecta una gran cantidad de variables ambientales, sociales, económicas y políticas. Es la sustancia que vincula el mundo cultural, social y político. La abundancia y calidad del agua no son solamente un reflejo de las condiciones naturales ambientales, sino también de sus usos que la transforman continuamente."*

Corresponde a los municipios y departamentos, acorde con lo dispuesto en la Constitución Política y la ley, expedir normas en materia ambiental sujetos a los principios de armonía regional, gradación normativa y rigor subsidiario para la gestión ambiental en su jurisdicción, debiendo asumir la planificación, ordenamiento y gestión del territorio, así como la articulación de las políticas nacionales y lograr la participación efectiva de todos los actores para lograr un fin común con indicadores de seguimiento para lograr la sostenibilidad territorial, objetivo que no se ha cumplido en la cuenca hidrográfica del Río Bogotá, pues es evidente la contaminación del mismo por la falta de gestión en el respectivo territorio, en cuanto hace a los usos del suelo y reglamentación del manejo de residuos sólidos.

Dentro de este contexto, y considerando que la cuenca tiene múltiples ecosistemas relacionados con el agua, los páramos, los bosques, para su conservación, aprovechamiento y restauración, se exige una gestión integral de carácter institucional tanto del agua como del territorio.

En este sentido la Política Nacional Ambiental advierte que: *"(...) uno de los principales problemas que se da para el manejo de la zona costera es la falta de coordinación entre las instituciones involucradas y de una aproximación integrada a la búsqueda de soluciones a la problemática ecosistémica (...)".*

Expediente No. 25000-23-27-000-2001-0479-01  
Acumulados Nos. 2000-0428, 2001-0122, 2001-0343  
Actor: GUSTAVO MOYA ÁNGEL Y OTROS  
Acción Popular

Y agrega que "(...) más una entidad realizadora de actividades similares dentro del mismo ámbito de cobertura, creándose duplicidad e inadecuada asignación de funciones, lo cual obstaculiza su manejo eficaz. Se han realizado esfuerzos de coordinación, pero estos mecanismos no han sido los más efectivos. Por ello, es necesario tener claro el problema a abordar, así como tener un intercambio de información fluido entre las instituciones (...)".

Por su parte la Política de Gestión Ambiental Urbana, señala: "(...) en el marco de esta política, la ciudad sostenible se entenderá como aquella que integra la dimensión ambiental, combina el desarrollo económico, la elevación de la calidad de vida y el desarrollo social de su población, sin agotar la base de los recursos naturales renovables en que se sostiene, ni deteriorar el medio ambiente o el derecho de las generaciones futuras a utilizarlo para la satisfacción de sus propias necesidades.

Este concepto se complementa con las consideraciones de los Lineamientos Ambientales para la Gestión Urbano Regional en Colombia, según los cuales, "la sostenibilidad de las ciudades no puede referirse únicamente a las formas de ocupar, producir y consumir el espacio construido para garantizar la permanente regeneración de sus sistemas sociales y económicos mediante la adopción de patrones de ordenamiento y ocupación del suelo urbano. La vida humana en las ciudades depende fundamentalmente de su relación con regiones próximas y lejanas de las cuales obtiene los insumos de energía y materia esenciales para su reproducción sostenida y creciente.

"Por lo tanto, para asegurar el desarrollo sostenible de las ciudades Colombianas, éstas deben de manera prioritaria, establecer una nueva forma de relación con las regiones circundantes de las cuales depende su metabolismo".

Expediente No. 25000-23-27-000-2001-0479-01  
Acumulados Nos. 2000-0428, 2001-0122, 2001-0343  
Actor: GUSTAVO MOYA ÁNGEL Y OTROS  
Acción Popular

*"Para esto es necesario adoptar un esquema de gestión descentralizado y democrático del desarrollo urbano que permita un uso racional de los recursos naturales renovables y no renovables en el contexto regional, teniendo como referente su disponibilidad y renovabilidad, así como las condiciones de agotabilidad y demanda a las que son sometidos".*

Considera que la problemática relacionada con lo institucional radica en: *"Poco acompañamiento y apoyo del nivel central, a las regiones y municipios. Desarticulación operativa de las entidades del SINA e insuficiente respuesta institucional, en términos de escasos niveles de coordinación y baja capacidad técnica y operativa para atender la problemática ambiental urbana. Dificultades y conflictos para atender las zonas compartidas o limítrofes. Falta de articulación y comunicación entre las autoridades ambientales y los actores sociales. Deficiencias en la coordinación entre las autoridades ambientales, las administraciones locales y el sector productivo. Insuficiencias en el seguimiento, control y vigilancia ambiental. Falta de concertación de estrategias para impulsar el uso eficiente y la prevención de la contaminación con los principales sectores productivos. Poca articulación y discontinuidad de políticas y acciones públicas que garanticen el uso sostenible de los recursos naturales renovables en las áreas urbanas. Inexistencia de instituciones encargadas de espacio público en los municipios. Falta de recursos para la gestión ambiental urbana".*

Así pues, la creación de un ente articulador de las entidades con responsabilidades directas en el saneamiento del Río Bogotá, resulta necesario para dar continuidad al proceso de recuperación de la cuenca. Este ente, que podría llegar a denominarse Gerencia Estratégica de Cuenca para el Saneamiento del Río Bogotá, el cual permitirá la coordinación de acciones implementando los principios de concurrencia,

Expediente No. 25000-23-27-000-2001-0479-01  
Acumulados Nos. 2000-0428, 2001-0122, 2001-0343  
Actor: GUSTAVO MOYA ÁNGEL Y OTROS  
Acción Popular

subsidiaridad, armonía regional y gradación normativa. También facilitará la articulación interinstitucional y el accionar adecuado de los diferentes convenios vigentes para el adecuado manejo e inversión de los recursos financieros. Se trata de una instancia para la adopción de políticas así como para la aprobación de proyectos de inversión a financiar o cofinanciar con recursos de la Nación y, demás actividades puedan llegar a definirse, cuyas decisiones tendrán carácter vinculante para todos sus miembros y autoridades que impactan la cuenca hidrográfica del río Bogotá.

A su vez, las entidades que lo integran podrán celebrar contratos o convenios plan, como mecanismos para establecer las obligaciones y compromisos requeridos para que se ejecuten las políticas, se evite duplicidad de esfuerzos y se asegure la coherencia de las políticas y programas de las entidades que hacen parte del Sistema.

Este órgano de coordinación deberá contar con la información que posean los organismos y entidades que integran el Sistema, relacionada con la actividad propia del mismo, razón por la cual debe ser entregada al órgano de dirección, en los términos que para el efecto se establezcan por la gerencia de cuenca.

Es viable contemplar la constitución de una Gerencia Estratégica de Cuenca como órgano de coordinación para articular a las autoridades y los recursos dispuestos para adelantar la gestión integral y multi-sistémica para el río Bogotá, la deberá involucrar no sólo a los municipios de la cuenca, incluido el Distrito Capital sino también al Departamento de Cundinamarca, a los Ministerios, al Departamento Nacional de Planeación y a la Corporación Autónoma Regional y demás organismos públicos y privados que tengan injerencia en la Cuenca.

Expediente No. 25000-23-27-000-2001-0479-01  
Acumulados Nos. 2000-0428, 2001-0122, 2001-0343  
Actor: GUSTAVO MOYA ÁNGEL Y OTROS  
Acción Popular

Igualmente, los recursos destinados a este propósito provienen no sólo de la Nación a través del Sistema General de Participaciones, con asignación específica<sup>204</sup> y el Fondo Nacional de Regalías<sup>205</sup>, sino también de los recursos recaudados por concepto de la sobretasa ambiental al impuesto predial de Bogotá<sup>206</sup>, las tasas retributivas y compensatorias, así como los provenientes de créditos de la Banca Multilateral para la financiación del Proyecto Adecuación Hidráulica y Recuperación Ambiental del Río Bogotá, en condiciones financieras favorables, así como de otros créditos externos, todo ello dentro del marco constitucional y legal de los recursos que con destinación específica se han establecido para la recuperación y sostenibilidad de la Cuenca Hidrográfica del Río Bogotá, así como de su recaudo por cada una de las entidades en ejercicio de sus competencia.

En estos términos, la gerencia estratégica de cuenca tendrá que actuar respecto de la ejecución de proyectos, su seguimiento y evaluación, así como respecto del recaudo, administración y utilización de los recursos a través de un Fondo Cuenta administrado por una fiducia.

- **Ventajas de la Gerencia Estratégica de Cuenca**

Como ventajas de la creación de una Gerencia de Cuenca, podemos señalar las siguientes:

- Manejar de forma conjunta y coordinada el saneamiento integral del Río Bogotá, en desarrollo de los principios de colaboración armónica, coordinación, concurrencia, complementariedad, economía y eficiencia.
- Ampliar la cobertura de los servicios públicos domiciliarios de acueducto y/o alcantarillado de los

---

<sup>204</sup>Ver parágrafo del artículo 6, Ley 1176 de 2007

<sup>205</sup>El DNP priorizó la destinación de recursos por des-acumulación del Portafolio del Fondo Nacional de Regalías.

<sup>206</sup> Ver artículo 102, Ley 1151 de 2007.

Expediente No. 25000-23-27-000-2001-0479-01  
Acumulados Nos. 2000-0428, 2001-0122, 2001-0343  
Actor: GUSTAVO MOYA ÁNGEL Y OTROS  
Acción Popular

municipios de toda la cuenca del Río Bogotá (respuesta estructural).

- Fortalecer la capacidad de gestión de los recursos del nivel nacional e internacional.

- Lograr un ordenamiento ambiental de la cuenca de manera integral con la participación de todos sus actores (respuesta institucional).

- Incorporar al sector privado en la solución de la problemática del río, garantizando el cumplimiento de los principios de participación, corresponsabilidad y solidaridad en la gestión ambiental.

- **Funciones de la Gerencia Estratégica de Cuenca**

El alcance de sus funciones está sujeto a los objetivos asignados de desarrollo y gestión integral, con cuatro componentes fundamentales: ambiental, técnico, social y económico.

Ambiental, en cuanto ha de considerarse el río como una unidad integrada por múltiples elementos, de orden físico y ecológico.

Social, en cuanto debe involucrar a todos los actores que se benefician o utilizan el recurso hídrico, y busca la articulación entre los mismos para lograr un objetivo común.

Facilitar el crecimiento económico mediante el mejor uso de los recursos naturales de la cuenca, tal como el uso múltiple del agua en forma armónica con las metas de transformación productiva.

Dentro del componente económico deberá tener facultades para administrar los recursos recaudados por virtud de la ley destinados a la ejecución de los proyectos, planes y

Expediente No. 25000-23-27-000-2001-0479-01  
Acumulados Nos. 2000-0428, 2001-0122, 2001-0343  
Actor: GUSTAVO MOYA ÁNGEL Y OTROS  
Acción Popular

programas requeridos para el saneamiento del río Bogotá, sus afluentes y del embalse del Muña.

Igualmente deberá promover la celebración de convenios o acuerdos entre las entidades públicas y/o privadas y los particulares con el fin de aunar esfuerzos para contribuir con recursos financieros, técnicos o de cualquier otra índole para satisfacer de manera concertada las necesidades de la cuenca y poder realizar de manera eficaz el control y monitoreo de los resultados obtenidos desde el punto de vista financiero y de inversión de los recursos.

De otra parte, deberá coordinar y evaluar los servicios relativos a la capacitación, educación, salud, créditos y financiamiento, asistencia técnica, protección ambiental, información hidrológica, monitoreo, formulación de planes, coordinación de actividades, diseño y operación de sistemas de alerta y de defensa civil y otros.

Deberá igualmente contar con un sistema orientado a recopilar toda la información disponible sobre estudios hechos en la cuenca, mapas, fotografías, planes, proyectos, videos y otros documentos existentes de tal forma que el público pueda tener acceso a dicha información.

La tarea inicial de la autoridad de cuenca será primordialmente la de facilitar la coordinación de acciones en la cuenca, vinculadas al manejo del agua, sin pretender modificar las atribuciones de cada entidad. Ello no obsta para que en desarrollo de la coordinación sea posible determinar las áreas de trabajo que no tienen responsables de su ejecución.

Decidir en principio sobre la forma de adaptar las políticas nacionales a la política de gestión del recurso agua y los instrumentos de planeación expedidos para el efecto, tales como: el PGAR; el PGIR; el POMCA y los POTs, pues del uso

Expediente No. 25000-23-27-000-2001-0479-01  
Acumulados Nos. 2000-0428, 2001-0122, 2001-0343  
Actor: GUSTAVO MOYA ÁNGEL Y OTROS  
Acción Popular

adecuado del territorio depende el manejo de la cuenca y el plan de gestión ambiental regional (PGAR), el plan de acción (anteriormente plan de acción trienal (PAT), planes de ordenamiento del recurso hídrico (PORH), el plan de ordenación forestal (POF), así como, planes de manejo (PM) de los ecosistemas más importantes en su jurisdicción (humedales, páramos, manglares, entre otros); además, deben asesorar y concertar los planes de ordenamiento y los planes de saneamiento y manejo de vertimientos (PSMV); Reglamento Técnico de Agua Potable y Saneamiento Básico (RAS), adoptado mediante la Resolución 1096 de 2000, y los planes departamentales de agua, todos estos instrumentos de planeación están relacionados en mayor o menor medida con el recurso hídrico.

Decidir sobre los instrumentos (económicos, financieros, informativos, educativos y otros) que utilizarán para poner en práctica la gestión del agua y otros recursos.

Decidir sobre la forma de relacionarse con las instituciones que existen a nivel nacional, regional y local con el fin de distribuir responsabilidades, tareas y presupuestos.

Proponer y justificar ideas de financiamiento.

Proponer y justificar ideas de inversión.

Proponer y justificar ideas de control de usos de agua.

Revisar las propuestas de inversión de cada sector usuario.

Revisar los estudios de impactos ambientales hechos por otras entidades y hacer los propios.

Proponer proyectos y opciones de interés político-social.

Expediente No. 25000-23-27-000-2001-0479-01  
Acumulados Nos. 2000-0428, 2001-0122, 2001-0343  
Actor: GUSTAVO MOYA ÁNGEL Y OTROS  
Acción Popular

Avalar el POMCA para la cuenca del Río Bogotá, una vez se haya modificado acorde con los lineamientos de esta sentencia.

Y las demás necesarias para la gestión integral de la cuenca hidrográfica.

- **Estructura operativa de la Gerencia Estratégica de Cuenca**

La gerencia de cuenca podrá contar con una estructura pequeña pero con personal de alta capacidad y experiencia, con dos áreas de gestión, que serán la técnica y la administrativa. El personal vinculado a la entidad de cuenca, en cualquiera de sus áreas, nombrado en comisión por las entidades responsables, para abordar acciones y tareas, acorde con su experiencia, competencia y conocimiento.

**a. Conformación y Funciones del Comité Directivo**

La Gerencia de Cuenca, para su adecuado funcionamiento, podrá contar con el compromiso institucional de las entidades del sector público que tienen funciones y competencias relacionadas con el agua, ordenamiento del territorio y usos del suelo en la cuenca del Río Bogotá y eventualmente estará integrado por: El Ministerio de Ambiente y Desarrollo Sostenible, la Gobernación de Cundinamarca (Gobernador, Secretarías de Planeación, ambiente y salud), la Alcaldía Mayor de Bogotá -Secretaría Distrital de Ambiente-, la Empresa de Acueducto y Alcantarillado de Bogotá, la CAR, y un representante de los municipios de las cuencas alta, media y baja.

Este Comité tendrá las siguientes funciones:

- Designar al Director de la Gerencia de Cuenca y servir de enlace entre cada una de las entidades que impactan la cuenca hidrográfica y la Gerencia de cuenca.

Expediente No. 25000-23-27-000-2001-0479-01  
Acumulados Nos. 2000-0428, 2001-0122, 2001-0343  
Actor: GUSTAVO MOYA ÁNGEL Y OTROS  
Acción Popular

- Expedir su reglamento.
- Aprobar los planes de acción preparados por la Gerencia que deben incluir cronograma de actividades y presupuestos.
- Requerir a las autoridades competentes para que efectúen oportunamente los aportes a la fiducia que se establezca para manejar los recursos asignados a las obras de infraestructura y demás actividades establecidas para la recuperación y sostenibilidad de la cuenca.
- Coordinar la participación de las diferentes entidades en los proyectos y actividades, así como asegurar el cumplimiento de los compromisos institucionales.
- Establecer las directrices para lograr la articulación de los instrumentos de planeación y demás disposiciones que regulan la gestión integral para la Cuenca del río Bogotá.
- Hacer el seguimiento y evaluación de la gestión integral para la Cuenca del río Bogotá con miras a orientar la toma de decisiones por las autoridades competentes, así como dar a conocer los resultados de la gestión.

#### **b. Funciones del Gerente**

El Gerente de la autoridad de cuenca deberá ser un experto en administración y gerencia, con experiencia en temas relacionados con el manejo integral de la cuenca (saneamiento, entre otros), calificado para facilitar el proceso de coordinación interinstitucional y capacidad de liderazgo para resolución de conflictos así como para la toma de decisiones y recaerá en cabeza del Ministerio de Ambiente y Desarrollo Sostenible, la CAR, la Gobernación de Cundinamarca y la Secretaría Distrital de Ambiente, de manera rotativa y elegido por el Comité de Cuenca.

#### **Funciones:**

- Elaborar el Plan de Acción de la Gerencia, acorde con

Expediente No. 25000-23-27-000-2001-0479-01  
Acumulados Nos. 2000-0428, 2001-0122, 2001-0343  
Actor: GUSTAVO MOYA ÁNGEL Y OTROS  
Acción Popular

los lineamientos de la sentencia y presentarlo al Comité Directivo en un plazo mínimo de tres meses a partir de su integración.

- Presidir el Comité de la Gerencia de Cuenca
- Proponer al Comité Directivo los cambios al Plan de Acción que se consideren necesarios.
- Recibir y llevar un registro de los informes de los desembolsos efectuados por la fiducia de acuerdo con lo planteado en el Plan de Acción.
- Presentar informes semestrales de avance y gestión al Comité Directivo, debidamente soportados.
- Representar a la Gerencia ante las entidades e instancias que lo requieran.

#### **c. Funciones del Área Técnica**

Esta área tendrá como funciones las siguientes:

- Apoyar al GERENTE en lo relacionado con diseño, propuestas, presupuestos, consecución de recursos y otros aspectos que requieran la intervención de expertos técnicos.
- Preparar los conceptos técnicos que le solicite la gerencia.
- Mantener la articulación con las entidades participantes.
- Las demás que le señale el reglamento.

En el área técnica se contará con una Secretaría Técnica en cabeza del Ministerio de Ambiente y Desarrollo Sostenible, el personal técnico requerido deberá provenir de cada una de las entidades que la integran, según las necesidades y con una experiencia específica en el tema.

#### **d. Funciones del Área Administrativa**

El área administrativa será responsable del manejo de los recursos asignados a la Gerencia de cuenca por las entidades involucradas y la contratación de servicios y personal de la

Expediente No. 25000-23-27-000-2001-0479-01  
Acumulados Nos. 2000-0428, 2001-0122, 2001-0343  
Actor: GUSTAVO MOYA ÁNGEL Y OTROS  
Acción Popular

dirección, la cual podrá contar con un administrador con amplia experiencia en el sector público. Las funciones de esta área serán:

- Apoyar a la Dirección en todos los aspectos administrativos necesarios para la buena marcha de la gerencia.
- Realizar las labores correspondientes a la administración de la fiducia de los recursos de la entidad de cuenca.
- Generar las condiciones logísticas adecuadas para el buen desarrollo de la Gerencia de Cuenca, incluyendo la convocatoria a sesiones de conformidad con el reglamento, así como el archivo de las actas de las reuniones.
- Las demás que le señale el reglamento. D

#### I.4.4.4. ESTRATEGIAS DEL CONSEJO DE ESTADO

Teniendo en cuenta lo anterior, para la Sala es clara la evidente urgencia de contar con una "Gerencia Estratégica de Cuenca - GECH" en el Río Bogotá bajo los parámetros señalados. En este sentido, se ordenará al Ministerio de Ambiente y Desarrollo Sostenible que en el término perentorio e improrrogable de seis (6) meses contados a partir de la ejecutoria de la sentencia, presente el correspondiente proyecto de ley para la creación de la *Gerencia Estratégica de la Cuenca Hidrográfica del río Bogotá - GECH* -, de acuerdo con la parte motiva de esta providencia.

No obstante y en ejercicio de los poderes del juez popular, la Sala considera que mientras se presenta el proyecto de ley en comento se requiere la conformación de un órgano articulador y coordinación.

En efecto y como se precisó en acápites anteriores, de acuerdo con la Ley reguladora de la acción popular, la misma

Expediente No. 25000-23-27-000-2001-0479-01  
Acumulados Nos. 2000-0428, 2001-0122, 2001-0343  
Actor: GUSTAVO MOYA ÁNGEL Y OTROS  
Acción Popular

se ejerce para evitar el daño contingente, hacer cesar el peligro, la amenaza, la vulneración o agravio sobre los derechos e intereses colectivos, o restituir las cosas a su estado anterior si ello fuere posible-, cuando quiera que por la acción u omisión de las autoridades públicas o de los particulares, sean violados o amenazados -. Casos en los que corresponde al juez popular adoptar las órdenes de hacer o de no hacer, definiendo de manera precisa la conducta a cumplir, condenar al pago de perjuicios cuando se haya causado daño y, en fin, exigir la realización de las conductas necesarias para volver las cosas al estado anterior a la vulneración del derecho o del interés colectivo, cuando fuere físicamente posible, de manera tal que se garantice la eficacia de los derechos vulnerados, como lo exige el artículo 88 constitucional.

En la sentencia que ampara los derechos colectivos el juez está facultado para adoptar las medidas que, conforme a la situación fáctica probada, sean conducentes y pertinentes para obtener la protección de dichos derechos.

Así pues que se requiere de manera transitoria de un Consejo que tenga por objeto lo siguiente:

- *Coordinación y cooperación interinstitucional:* Como estrategia se orienta a mejorar, ampliar y consolidar espacios de coordinación, cooperación y cogestión entre los entes territoriales y las autoridades ambientales para la implementación y seguimiento de la Política de Gestión Ambiental.

- *Desarrollar acciones de articulación y coordinación para la planificación ambiental territorial entre las diferentes instituciones con competencia en el tema, en especial en aspectos como formulación de planes de ordenamiento de cuencas hidrográficas; formulación y gestión de planes de manejo de ecosistemas y áreas protegidas compartidas;*

Expediente No. 25000-23-27-000-2001-0479-01  
Acumulados Nos. 2000-0428, 2001-0122, 2001-0343  
Actor: GUSTAVO MOYA ÁNGEL Y OTROS  
Acción Popular

*formulación y ejecución conjunta de proyectos compartidos; constitución de fondos de descontaminación hídrica de cuencas comunes; manejo de áreas suburbanas, entre otros.*

*- Incrementar los mecanismos de coordinación y cooperación interinstitucional y evaluar periódicamente su gestión para que permitan el fortalecimiento de las instituciones encargadas de la gestión ambiental urbana.*

*- Establecer directrices y procedimientos para la articulación de acciones entre las Corporaciones Autónomas Regionales y las Autoridades Ambientales Urbanas, para el manejo y financiación de proyectos comunes.*

*- Desarrollar acciones para la articulación entre autoridades ambientales, entes territoriales y autoridades sectoriales".*

*- Establecer directrices y crear programas para la cooperación regional entre los entes territoriales y las autoridades ambientales para la formulación, estructuración, desarrollo, implementación, ejecución y puesta en marcha de las estrategias, planes, programas, proyectos y, en general, todas las actividades necesarias para la gestión integral de la cuenca hidrográfica del río Bogotá.*

*- Dirimir las diferentes problemáticas del orden técnico, administrativo y financiero en torno al recurso hídrico en la cuenca hidrográfica del Río Bogotá.*

*- Realizar el monitoreo, evaluación y seguimiento a la gestión adelantada de manera integral para la recuperación y sostenibilidad de la cuenca del río Bogotá.*

#### **I.4.4.3.8. MANEJO Y ADMINISTRACION DE RECURSOS**

El principal elemento que sustenta el financiamiento de una entidad de cuenca es la creación de un **fondo financiero** -

Expediente No. 25000-23-27-000-2001-0479-01  
Acumulados Nos. 2000-0428, 2001-0122, 2001-0343  
Actor: GUSTAVO MOYA ÁNGEL Y OTROS  
Acción Popular

**Fondo Cuenta para la Gerencia Estratégica de la Cuenca del río Bogotá-**. Este fondo estará conformado por los aportes provenientes de las distintas actividades productivas de la región de la cuenca u otras fuentes externas a ella.

#### **I.4.4.3.9. FONDO CUENTA**

La viabilidad de la gerencia de cuenca propuesta, así como del componente financiero analizado para desarrollar los planes de acción y proyectos que lo conforman requiere de la disponibilidad de recursos y de la operatividad en su asignación y ejecución. Para ello se requiere de un instrumento para captar y administrar los recursos respetando la autonomía de cada uno de los entes que la integran, que los recursos se asignen de manera concertada y que su administración sea autónoma.

El Fondo será constituido en un plazo no mayor a treinta (30) días, a partir de la constitución de la Gerencia de Cuenca, como una cuenta especial con autonomía técnica y financiera, con el propósito de invertir, destinar y ejecutar sus recursos en el Plan de Acción para la rehabilitación, recuperación y desarrollo sostenible de la Cuenca del río Bogotá.

Los recursos destinados al Fondo, serán de carácter acumulativo y no podrán ser retirados del mismo para cuestiones distintas a la gestión para la recuperación y sostenibilidad de la cuenca del río Bogotá.

#### **I.4.4.3.10. NATURALEZA JURIDICA**

Será concebido como un sistema de manejo de cuentas de parte de los bienes o recursos destinados para la recuperación y sostenibilidad de la cuenca hidrográfica del río Bogotá, para el cumplimiento de los objetivos contemplados en el acto de su creación y cuya administración se hace en los términos señalados por éste, con el objeto de que las acciones e

Expediente No. 25000-23-27-000-2001-0479-01  
Acumulados Nos. 2000-0428, 2001-0122, 2001-0343  
Actor: GUSTAVO MOYA ÁNGEL Y OTROS  
Acción Popular

inversiones priorizadas sean las adecuadas bajo el criterio de globalidad regional.

Como instrumento de financiación, con fines de interés público y de gestión integral para la Cuenca del Río Bogotá, es una cuenta especial.

Ello implica disponer de los recursos de cada uno de los actores, captados por la autoridad competente, acorde con el ordenamiento jurídico y de conformidad con la destinación específica prevista para el efecto, como lo consagran las disposiciones contenidas en la Ley 99 de 1993, la Ley del Plan de Desarrollo, y demás disposiciones, cuyo análisis se realizará en detalle en la explicación del componente financiero.

Igualmente, los recursos pueden provenir de las sanciones impuestas a los infractores y del sector privado, particularmente del sector productivo que emplea el recurso hídrico, así como del crédito interno o externo.

#### **I.4.4.3.11. CARACTERISTICAS**

Los objetivos generales del Fondo atenderán a la negociación, obtención, recaudo, administración, inversión gestión de instrumentos de protección financiera y distribución de los recursos financieros necesarios para la implementación y continuidad de la gestión integral adoptada para la Cuenca del río Bogotá.

En estos términos el Fondo podrá recibir, administrar e invertir recursos de origen estatal, departamental, municipal, regional y/o contribuciones y aportes efectuados a cualquier título por personas naturales o jurídicas, instituciones públicas y/o privadas del orden nacional e internacional; recursos que además deberán invertirse en la adopción de medidas de conocimiento y educación dirigidos a

Expediente No. 25000-23-27-000-2001-0479-01  
Acumulados Nos. 2000-0428, 2001-0122, 2001-0343  
Actor: GUSTAVO MOYA ÁNGEL Y OTROS  
Acción Popular

las entidades involucradas en los diferentes procesos de gestión.

El Fondo desarrollará sus funciones y operaciones de manera directa, subsidiaria o complementaria, bajo esquemas interinstitucionales de cofinanciación, concurrencia y subsidiariedad.

Los bienes y recursos que hacen parte del Fondo estarán sujetos a las apropiaciones que para el efecto se asignen en el Presupuesto General de la Nación con destinación específica; los provenientes del Sistema General de Regalías, de los ingresos previstos en la ley de origen tributario y no tributarios, así como los provenientes del sector público, del sector privado, de la Banca Multilateral nacional e internacional.

Los recursos del Fondo se orientarán, asignarán y ejecutarán acorde con las directrices del Plan de Gestión Integral para la Cuenca del río Bogotá, con las previsiones especiales que contemplen los planes de acción específicos para la gestión integral de recuperación y sostenibilidad de la Cuenca del río Bogotá.

La dirección del Fondo estará a cargo de la Gerencia Estratégica de Cuenca la cual deberá velar por el cumplimiento e implementación de los objetivos del Fondo: negociación, obtención, recaudo, administración, inversión, gestión de instrumentos de protección financiera y distribución de los recursos financieros.

El Fondo contará con las siguientes fuentes de recursos:

1.- Los recursos provenientes del **Sistema General de participaciones -SGP Ley 1176 de 2007**, art. 6 numeral 2 y parágrafo: 100% de la participación de Bogotá en la distribución del SGP sectorial para departamentos.

Expediente No. 25000-23-27-000-2001-0479-01  
Acumulados Nos. 2000-0428, 2001-0122, 2001-0343  
Actor: GUSTAVO MOYA ÁNGEL Y OTROS  
Acción Popular

- 2.- Los recursos provenientes del **Sistema General de Participaciones -SGP Ley 1176 de 2007**, provenientes de la participación de Bogotá en la distribución del SGP sectorial como municipio entre los años 2011 y 2040 cuando exista saldo positivo entre los recursos asignados y el valor del déficit entre subsidios y aportes solidarios.
- 3.- Los recursos provenientes del Fondo Nacional de Regalías, 2.46% (Ley 756/02).
- 4.- Los recursos provenientes del Impuesto Predial, transferencia hecha por la CAR al DC. Acorde con el parágrafo 2 art. 44 de la Ley 99 de 1993.
- 5.- Los recursos provenientes de las tasas retributivas (art. 66 Ley 99 de 1993).
- 6.- Los recursos provenientes del 7.5% del predial (art. 44 Ley 99 de 1993).
- 7.- Los recursos provenientes de la Banca Multilateral
- 8.- Los recursos provenientes del 6% de las rentas brutas del sector eléctrico, esto es el 100% de las transferencias del sector eléctrico a Bogotá D.C., Ley 99 de 1993 artículo 45.
- 9.- El 100% del recaudo por concepto de otorgamiento licencias, permisos, autorizaciones, concesiones y salvoconductos en la cuenca.
- 10.- El aporte de la Empresa de Acueducto y Alcantarillado de Bogotá E.S.P. EAAB.
- 11.- Los recursos provenientes de los incentivos tributarios artículo 424-5 (numeral 4) y 428 literal f del Estatuto Tributario.
- 12.- Los recursos provenientes de la cooperación técnica, reconversión industrial, producción más limpia y créditos FINDETER.
- 13.- Los provenientes de la Gobernación de Cundinamarca, a través del Plan Departamental de Agua y Saneamiento de Cundinamarca (incluye los recursos del SGP del municipio de Soacha). Sujeto a las normas de procedimiento y vigencias futuras y las que se expidan sobre el particular.

**Expediente No. 25000-23-27-000-2001-0479-01**  
**Acumulados Nos. 2000-0428, 2001-0122, 2001-0343**  
**Actor: GUSTAVO MOYA ÁNGEL Y OTROS**  
**Acción Popular**

14.- Los demás previstos en el artículo 41 del Decreto 1640 de 2012, no señalados específicamente en los numerales anteriores<sup>207</sup>.

---

<sup>207</sup> De la financiación del proceso de ordenación y manejo de cuencas hidrográficas

Artículo 41. De las fuentes de financiación. Las entidades responsables de la implementación del Plan, en el marco de sus competencias, podrán destinar para este fin, los siguientes recursos:

1. Los provenientes de las Corporaciones Autónomas Regionales y de Desarrollo Sostenible competentes, tales como:

- a. Las tasas retributivas por vertimientos a los cuerpos de agua.
- b. Las tasas por utilización de aguas.
- c. Las transferencias del sector eléctrico.
- d. Las sumas de dinero que a cualquier 'título le transfieran las personas naturales y jurídicas con destino a la ordenación y manejo de la cuenca hidrográfica.
- e. Las contribuciones por valorización.
- f. Las provenientes de la sobretasa o porcentaje ambiental.
- g. Las compensaciones de que trata la Ley 141 de 1994 o la norma que la modifique o adicione.
- h. Las tasas compensatorias o de aprovechamiento forestal.
- i. Convenio o Contrato Plan a que se refiere la Ley 1450 de 2011 en su artículo 8 para ejecución de proyectos estratégicos.
- j. Los demás recursos que apropien para la ordenación y manejo de las cuencas hidrográficas.

2. Los provenientes de las entidades territoriales, tales como:

- a. El 1% de que trata el artículo 111 de la Ley 99 de 1993 o la norma que la modifique, sustituya o adicione.
- b. Los apropiados en su presupuesto en materia ambiental.
- c. Los previstos en materia ambiental en el Plan Nacional de Desarrollo vigente, en relación con los planes para el manejo Empresarial de los Servicios de Agua y Saneamiento.

3. Los provenientes de los usuarios de la cuenca hidrográfica, tales como:

- a. El 1% de que trata el parágrafo del artículo 43 de la Ley 99 de 1993 o la norma que la modifique, sustituya o adicione.
- b. Los que deban ser invertidos en medidas de compensación por el uso y aprovechamiento y/o intervención - afectación de los recursos naturales renovables.
- c. Los no derivados del cumplimiento de la legislación ambiental en el marco de su responsabilidad social empresarial.
4. Los provenientes del Sistema General de Regalías.
5. Los provenientes del Fondo de Compensación Ambiental.
6. Los provenientes del Fondo Nacional Ambiental - FONAM.
7. Los provenientes del Fondo de Adaptación.
8. Los provenientes de los Fondos que para tal efecto reglamente el gobierno nacional.
9. Los provenientes de cualquier otra fuente financiera y económica que la autoridad ambiental competente, identifique y deba ser ejecutada por parte de las personas naturales y/o jurídicas que tengan asiento en la cuenca hidrográfica.
10. Los provenientes de donaciones.
11. Recursos provenientes de la Ley 1454 de 2011

Parágrafo 1º. Para lo dispuesto en el presente artículo, se tendrá en cuenta la destinación específica prevista en cada fuente de financiación.

Parágrafo 2º. Los proyectos definidos en la fase de formulación del plan de ordenación y manejo de la cuenca hidrográfica, así como los proyectos de preservación y restauración de la~ mismas, podrán ser priorizados para

Expediente No. 25000-23-27-000-2001-0479-01  
Acumulados Nos. 2000-0428, 2001-0122, 2001-0343  
Actor: GUSTAVO MOYA ÁNGEL Y OTROS  
Acción Popular

15.- Los demás recursos que se recauden con este propósito provenientes de los organismos internacionales y demás instituciones públicas y privadas.

El Fondo Cuenta será administrado por una fiducia, con el fin de ejecutar las acciones que se generen en el cumplimiento del Proyecto de Saneamiento del Río Bogotá, el ordenador del gasto será la entidad competente de acuerdo con el ordenamiento jurídico y de conformidad con los lineamientos establecidos por la Gerencia Estratégica de Cuenca GERH.

En ejercicio de estas facultades el ordenador del gasto deberá:

- 1.- Garantizar la utilización de los recursos destinados a la gestión integral de la cuenca del río Bogotá de conformidad con el Plan de Gestión Integral para la Cuenca del río Bogotá.
- 2.- Llevar el registro de los actos administrativos expedidos por las autoridades competentes para la ejecución presupuestal de los recursos del fondo.
- 3.- Pagar de manera oportuna y adecuada las obligaciones que se hayan contraído con cargo a los recursos del Fondo, debidamente autorizados en el Plan de Gestión.
- 4.- Rendir los informes financieros al Comité de Cuenca, a la Contaduría General de la Nación, a los organismos de control y los que sean requeridos por las autoridades competentes cuando así lo soliciten.
- 5.- Gestionar el eficiente y oportuno recaudo de la totalidad de los recursos del Fondo para la gestión integral de la Cuenca del río Bogotá.

---

su ejecución por el FONAM, el Fondo de Compensación Ambiental y el Sistema General de Regalías, de conformidad con la normatividad vigente. Parágrafo 3°. Las inversiones de que trata el literal a) del numeral 3 del presente artículo, se realizarán en la cuenca hidrográfica que se encuentre en el área de influencia del proyecto objeto de licencia ambiental, de acuerdo a lo dispuesto en el Plan de Ordenación y Manejo de la Cuenca Hidrográfica.

Expediente No. 25000-23-27-000-2001-0479-01  
Acumulados Nos. 2000-0428, 2001-0122, 2001-0343  
Actor: GUSTAVO MOYA ÁNGEL Y OTROS  
Acción Popular

6.- Contratar la fiducia para la administración de los recursos y rendimientos financieros, los cuales deberán ingresar al presupuesto para ser ejecutados con la misma destinación que los originó.

7.- Las demás relacionadas con la oportuna y eficiente utilización de los recursos del fondo para la gestión integral de la Cuenca del río Bogotá.

La formulación del presupuesto del fondo se sujetará a los objetivos, programas y proyectos prioritarios establecidos por la Gerencia de Cuenca en coordinación con el Comité de cuenca.

La Gerencia de Cuenca podrá exigir a la sociedad fiduciaria cuentas comprobadas de su gestión con relación a la realización de los pagos y otras actividades complementarias o accesorias que finalmente son fundamentales para el cumplimiento y desarrollo de la gestión integral. También podrá revocar el contrato en cualquier momento o solicitar la remoción de la sociedad fiduciaria cuando haya causa justificada y nombrar otra en su remplazo. La Gerencia tendrá derecho a obtener al término del fideicomiso la devolución de los recursos entregados a la fiduciaria que no hayan sido ejecutados, a menos que en el contrato se prevea que deban pasar a otras entidades.

La sociedad fiduciaria por su parte deberá realizar diligentemente la gestión encomendada, actuando siempre en beneficio de la Gerencia, mantener separados los recursos que le hayan sido entregados de los suyos propios y de los que correspondan a otros negocios fiduciarios, seguir estrictamente las instrucciones señaladas por la Gerencia, proteger y defender los recursos que le hayan sido entregados, devolver al fideicomitente los bienes o transferirlos a quien éste indique, y rendir cuentas comprobadas de su gestión con la periodicidad que lo señale el contrato correspondiente.

Expediente No. 25000-23-27-000-2001-0479-01  
 Acumulados Nos. 2000-0428, 2001-0122, 2001-0343  
 Actor: GUSTAVO MOYA ÁNGEL Y OTROS  
 Acción Popular

La adjudicación de contratos que se celebren para cumplir con los objetivos de la Gerencia serán aprobados por el Comité Directivo y los pagos que se realicen a terceros se harán previa autorización del Gerente.

Todos los desembolsos que se realicen en el cumplimiento de las actividades programadas por la Dirección de la autoridad de cuenca estarán ligados al cumplimiento del Plan de Acción. Con el esquema del Fondo administrado por una fiducia se pretende garantizar un manejo ágil y flexible de los recursos.<sup>208</sup>

Los recursos del FIAB y los recursos del Fondo Cuenta adscrito a la Secretaría de Hacienda Distrital serán considerados como subcuentas del Fondo Cuenta.

El FIAB, creado mediante Acuerdo 28 de 2005 y modificado por el Acuerdo No. 15 de 19 de junio de 2007, *"Por medio del cual se modifica el Fondo de las Inversiones Ambientales en el perímetro urbano de Bogotá -FIAB"*, Acuerdo 28 de 2005, expedido por el Consejo Directivo de la Corporación Autónoma Regional de Cundinamarca -CAR, continuará bajo administración de la CAR<sup>209</sup> pero deberá reportar informe anual sobre los ingresos recibidos y la rentabilidad al Fondo Cuenta administrado por la Gerencia Estratégica de Cuenca, con el objeto de hacer la planeación correspondiente de manera coordinada por períodos anuales y de largo y mediano plazo.

---

<sup>208</sup>Fuente Estructura: Informe Final septiembre de 2000 Unión Temporal Saneamiento Río Bogotá CD Anexo EAAB.  
 CEPAL, Autoridad de Cuenca  
 Manual para la gestión integrada de Recursos Hídricos en Cuencas, GWPforum. Documento DAMA.

<sup>209</sup>Los recursos del FIAB son de acuerdo con el artículo 44 de la Ley 99 de 1993, los captados por los municipios y distritos transferidos a las Corporaciones Autónomas Regionales, sobre el total del recaudo por concepto de impuesto predial, que no podrá ser inferior al 15% ni superior al 25.9%, los cuales se destinarán a la ejecución de programas y proyectos de protección o restauración del medio ambiente y los recursos naturales renovables, de acuerdo con los planes de desarrollo de los municipios del área de su jurisdicción.

Expediente No. 25000-23-27-000-2001-0479-01  
Acumulados Nos. 2000-0428, 2001-0122, 2001-0343  
Actor: GUSTAVO MOYA ÁNGEL Y OTROS  
Acción Popular

Al respecto se reiterará por esta Sala que los recursos destinados a dicho Fondo no podrán tener destinación distinta a la recuperación del río Bogotá y no sólo para las obras y proyectos que se adelanten para la capital sino para todo el perímetro de la cuenca del río Bogotá, puesto que lo que se pretende es su recuperación integral y sostenible.

Los recursos del Fondo Cuenta, ya referido, ordenado en la sentencia de Primera instancia, administrado por la Secretaría de Hacienda del Distrito que corresponden al recaudo del 7.5% del predial girado por la Secretaría de Hacienda del Distrito, pasarán a ser parte de los recursos del Fondo Cuenta constituido por la Gerencia de Cuenca.

#### **I.4.4.12. ANALISIS FINANCIERO**

Ante la necesidad de responder de manera eficiente y eficaz a la problemática compleja que envuelve la Cuenca del río Bogotá y su entorno con criterio de sostenibilidad a corto, mediano y largo plazo, la estrategia consiste en definir un modelo de decisiones, que permita establecer los objetivos, propósitos, políticas y planes para lograr la descontaminación del río Bogotá y sus afluentes, a partir del origen y fuente de los recursos, forma y periodicidad del recaudo, responsables, su manejo, administración, ejecución y seguimiento.

Para el efecto han de tenerse en cuenta los antecedentes que dieron lugar a adoptar las medidas para obtener los recursos para realizar las inversiones requeridas: i) de infraestructura general; ii) de infraestructura y otros programas a nivel local y regional y, iii) programas educativos: reciclaje, producción más limpia, vertimiento de residuos sólidos y actividad minera.

Expediente No. 25000-23-27-000-2001-0479-01  
Acumulados Nos. 2000-0428, 2001-0122, 2001-0343  
Actor: GUSTAVO MOYA ÁNGEL Y OTROS  
Acción Popular

En estos términos se desarrollará el análisis correspondiente, teniendo en cuenta:

**I.4.4.12.1. Documentos que contienen los mecanismos e instrumentos para financiar las inversiones requeridas para la solución propuesta**

Los documentos que contienen los mecanismos e instrumentos para financiar las inversiones requeridas para la solución propuesta, se encuentran referidos en: i) La sentencia de primera instancia; ii) En los documentos CONPES, iii) En los convenios y acuerdos.

**I.4.4.12.2. La sentencia de primera instancia**

La sentencia de primera instancia expedida el 25 de agosto

| OBRA                                                                        | RUBRO                                                                                            | PORCENTAJE                                                                                   | RESPONSABLE                        |
|-----------------------------------------------------------------------------|--------------------------------------------------------------------------------------------------|----------------------------------------------------------------------------------------------|------------------------------------|
| Interceptor T-C (construido)                                                | SGP-LEY 715<br>Propósito General                                                                 | Superior al 30% del 41%                                                                      | A cargo del D.C.                   |
| Planta de Tratamiento Aguas Residuales en Canoas- operación y mantenimiento | SGP- Ley 715<br>Propósito General                                                                | 50% del 41% hasta que la EAAB asuma operación y mantenimiento vía tarifas.art. 16 CRA 287/04 | A cargo del D.C.                   |
| Estación Elevadora y recursos faltantes PTAR                                | Impuesto Predial Transferencia CAR al DC (Parágrafo 2 art. 44 de la Ley 99 de 1993)              | 50% del 7.5%, previa deducción costos ampliación PTAR Salitre                                | A cargo del D.C.                   |
| Saldo                                                                       | <ul style="list-style-type: none"><li>Tasas retributivas</li><li>Recursos de la Nación</li></ul> | 50% Ley 99/93, art. 66 Ley 472/98 Principio del que daña paga                                | Transferencias CAR al D.C. Nación. |

25 de 2004, consideró en el numeral quinto de la parte resolutive como fuentes de financiación, los recursos provenientes: del Sistema General de Participaciones, del impuesto predial, de las tasas retributivas y de la Nación,

Expediente No. 25000-23-27-000-2001-0479-01  
Acumulados Nos. 2000-0428, 2001-0122, 2001-0343  
Actor: GUSTAVO MOYA ÁNGEL Y OTROS  
Acción Popular

para lo cual señaló su porcentaje, distribución y entidad responsable como se describe en el siguiente cuadro.

Además, el Tribunal de instancia dispuso:

- Estos recursos deben quedar afectados en un **FONDO CUENTA. Fuente normativa:** Acuerdo 31, creado por el Concejo Distrital, adscrito a la Secretaría de Hacienda.
- El **Mantenimiento y operación:** Pagada la deuda para la construcción de la PTAR CANOAS, la EAAB asumirá el mantenimiento y operación, vía tarifas (Resolución CRA 287 de 2004, art. 16), a cargo de la EAAB.
- La Ley 812 de 2003 "PLAN NACIONAL DE DESARROLLO" incluyó la descontaminación del río Bogotá como uno de los proyectos prioritarios, **por lo que las obras tendientes al logro de dicho objetivo pueden comprometer vigencias futuras con la apropiación anticipada de los mismos cuando su ejecución se inicie con el presupuesto de la vigencia en curso.**

**I.4.4.12.3. Los documentos del consejo de política económica y social - CONPES.**

- Documento CONPES 3320 expedido el 6 de diciembre de 2004 estrategia para el manejo ambiental del río Bogotá.

El Documento CONPES, con fundamento en la decisión del Tribunal y acorde con los costos y las propuestas técnicas planteadas por las partes involucradas en el proceso, realizó el siguiente análisis de carácter financiero que se sintetiza en los siguientes cuadros:

Expediente No. 25000-23-27-000-2001-0479-01  
Acumulados Nos. 2000-0428, 2001-0122, 2001-0343  
Actor: GUSTAVO MOYA ÁNGEL Y OTROS  
Acción Popular

1. CONPES 3320 de 2004

A.- INVERSIONES

Distrito Capital e Intervención en el Embalse del Muña

| Fuentes de Financiación                   | Millones de pesos de 2004 | Etapa I (2004-2008) | Etapa II (2009-2013) | Etapa III (2014-2020) |
|-------------------------------------------|---------------------------|---------------------|----------------------|-----------------------|
| Tarifas (costos ya incorporados)          | \$1.628.063               | \$1.316.755         | \$310.498            | \$810                 |
| 30% SGP Agua Potable y Saneamiento Básico | \$366.786                 | \$75.844            | \$103.656            | \$187.286             |
| FNR                                       | \$32.000                  | \$8.000             | \$10.000             | \$14.000              |
| Tasas Retributivas                        | \$199.469                 | \$44.488            | \$59.651             | \$95.330              |
| Recursos CAR (sobretasa predial)          | \$800.234                 | \$162.343           | \$225.684            | \$412.207             |
| DAMA                                      | \$69.453                  | \$39.216            | \$30.237             | 0                     |
| EEB+EMGESA Inversión (Muña)               | \$12.687                  |                     |                      | 0                     |
| EEB+EMGESA Operación (Muña)               | \$10.784                  |                     | 0                    | 0                     |
| Transferencias sector eléctrico           | \$8.619                   | \$2.422             | \$2.582              | \$3.615               |
| Total                                     | \$3.128.095               | \$1.672.539         | \$742.309            | \$713.247             |

Otros aspectos que consideró necesario tener en cuenta el documento CONPES 3320:

- Puso de presente que si bien gran parte de las inversiones estarían a cargo del Distrito Capital, las fuentes de financiación resultaban insuficientes, razón por la cual estimó considerar acciones alternativas que permitieran mayor gradualidad de las inversiones en el tiempo para reducir la presión fiscal sobre las finanzas del distrito y mantener la viabilidad financiera del programa.
- Igualmente anotó que, no era clara la capacidad financiera de la EAAB para incluir la PTAR CANOAS en la primera etapa (2004-2009), pues de acuerdo con el Documento Conpes 3177, se priorizaron obras de

Expediente No. 25000-23-27-000-2001-0479-01  
 Acumulados Nos. 2000-0428, 2001-0122, 2001-0343  
 Actor: GUSTAVO MOYA ÁNGEL Y OTROS  
 Acción Popular

saneamiento que debían realizarse antes de la construcción de la PTAR Canoas para que su operación fuese eficiente.

- Adoptar un esquema financiero independiente de la empresa que permitiera canalizar los recursos asignados al saneamiento del río Bogotá y reconociera a la entidad ser sujeto de crédito para obtener los recursos necesarios para cubrir el déficit del plan de descontaminación y poder contar con aval de la Nación.
- Agotar los mecanismos jurídicos y de concertación que permitieran realizar la inversión en la PTAR Canoas en la segunda etapa del Plan de Acción, teniendo en cuenta la intervención efectiva sobre el embalse del Muña.

Así las cosas el documento plantea los siguientes pasos a seguir:

- 1.- Cumplir con la regulación vigente en materia tarifaria.
- 2.- Definir un esquema institucional y empresarial más adecuado, bajo una perspectiva de gestión regionalizada.
- 3.- Lograr que los municipios comprometan el porcentaje de transferencias (Ley 715 de 2001), correspondiente a agua potable y saneamiento básico, para generar mayor estabilidad en el flujo de caja.

#### B.- Inversiones Distrito Capital

Dicha inversión comprende:

- Humedales, adecuación hidráulica, zonas de ronda y manejo ambiental (2004-2020)
- Plan Maestro de Alcantarillado STAR incluido en tarifa actual (Interceptores: Engativa-Cortijo; Fucha-Tunjuelo; Estación Elevadora Tunjuelo; dragado y preinversión Salitre).
- Inversiones STAR no incluidas en tarifa actual (ampliación estación elevadora Salitre, ampliación

Expediente No. 25000-23-27-000-2001-0479-01  
 Acumulados Nos. 2000-0428, 2001-0122, 2001-0343  
 Actor: GUSTAVO MOYA ÁNGEL Y OTROS  
 Acción Popular

PTAR Salitre, interceptor Tunjuelo-Canoas, estación elevadora de Canoas y PTAR Canoas).

- Recuperación ambiental del Muña
- DAMA
- Otros interceptores, troncales y secundarios incluido en tarifa actual 2004-2009, cuyos costos se estimaron en un subtotal de \$2.899.206 millones de pesos, discriminados en la etapa I, en \$2.557.661 millones de pesos, \$340.735 millones de pesos en la etapa II y \$810 millones de pesos calculados para la Fase III.

En relación con los costos financieros de inversiones no incluidos en la tarifa actual (hasta 2022), comprende:

- Operación 2004-2020: Estación Elevadora Salitre, PTAR Salitre, Recuperación ambiental Muña, Estación Elevadora Tunjuelo, Estación elevadora CANOAS y PTAR CANOAS.

Ello para un total de \$5.779.287 millones de pesos, discriminados en la etapa I, por la suma de \$2.775.939, en la etapa II, \$1.374.238 y en la etapa III, \$1.629.111 millones de pesos.

#### **Plan de Inversión Municipios Cuenca Alta, Media Occidental y Baja.**

La CAR realizó una encuesta para indagar por las inversiones previstas en los planes de desarrollo y Planes de Ordenamiento Territorial -POT- y sus fuentes de financiación.

Procesada la información se obtuvo que las principales inversiones tienen que ver con:

Expediente No. 25000-23-27-000-2001-0479-01  
Acumulados Nos. 2000-0428, 2001-0122, 2001-0343  
Actor: GUSTAVO MOYA ÁNGEL Y OTROS  
Acción Popular

- Terminación de Planes Maestros de Acueducto y Alcantarillado,
- Optimización de Plantas de Tratamiento de Aguas Residuales -PTAR y,
- Manejo integral de residuos sólidos

Prevía descripción de las fuentes de financiamiento, concluyó que es clara la diferencia entre inversión y fuentes de financiación y que si bien se cuenta con algunos recursos adicionales destinados por la Gobernación de Cundinamarca a proyectos de agua potable y saneamiento básico, es evidente la existencia de un déficit, lo que significa que los recursos de los municipios resultan insuficientes para cubrir el costo total de las inversiones, aún asumiendo que los costos de administración, operación y mantenimiento se financien vía tarifas.

FUENTES DE FINANCIACIÓN

| Fuente                                               | Estimación monto anual                    | Permanencia en el tiempo         |
|------------------------------------------------------|-------------------------------------------|----------------------------------|
| FNR                                                  | COL \$3.5 mil millones                    | Permanente, sujeto a presupuesto |
| PND                                                  | COL \$3.5 mil millones                    | Hasta 2007                       |
| Crédito                                              | Variable endeudamiento según de entidades | No permanente                    |
| Tarifas                                              | n.d.                                      | Permanente                       |
| Transferencias SGP-agua potable y saneamiento básico | COL \$80mil millones                      | Permanente sujeto a presupuesto  |
| Transferencias SGP libre destinación                 | COL \$14 mil millones                     | Permanente sujeto a presupuesto  |
| Predial                                              | COL \$84 mil millones                     | Permanente                       |
| Tasas por uso                                        | n.d.                                      | Permanente                       |
| Tasas retributivas                                   | COL \$12 mil millones                     | Permanente                       |

Expediente No. 25000-23-27-000-2001-0479-01  
Acumulados Nos. 2000-0428, 2001-0122, 2001-0343  
Actor: GUSTAVO MOYA ÁNGEL Y OTROS  
Acción Popular

|                             |        |                                  |                                         |
|-----------------------------|--------|----------------------------------|-----------------------------------------|
| Transferencias<br>eléctrico | sector | COL \$5 mil millones             | Permanente, función<br>de la generación |
| Incentivos tributarios      |        | En función de las<br>inversiones | No permanente                           |

Fuente: EEB - DNP Conpes 3320

En el siguiente cuadro se resumen las fuentes de los recursos, su fundamento normativo, el porcentaje, de estar establecido y la condición a la cual se encuentran sujetos el aporte de los mismos.

| Fuente de recursos                                                                                      | Fuente normativa                                     | Porcentaje (%)                                                     | Condición                                              |
|---------------------------------------------------------------------------------------------------------|------------------------------------------------------|--------------------------------------------------------------------|--------------------------------------------------------|
| FNR                                                                                                     | Ley 756/02                                           | 2.46%                                                              | Programación presupuestal anual y aprobación proyectos |
| PND                                                                                                     | Recursos Distribución Regional (SGP)                 | Libre destinación                                                  | n.a.                                                   |
| Crédito Externo                                                                                         | Banca Multilateral                                   | n.d.                                                               | Aval Nación                                            |
| Tarifas                                                                                                 | Ley 99/93, Ley 142/94, Dcto. 901/97, Decreto 3100/03 | De acuerdo ley                                                     | Resolución CRA establece metodología.                  |
| SGP                                                                                                     | Ley 715/01<br>Decreto 849/02                         | Destinación específica                                             | n.a                                                    |
| Porcentaje Predial                                                                                      | Ley 99/93, art. 44                                   | No inferior al 15% ni superior al 25.9% del 50% gestión ambiental. | n.a.                                                   |
| Transferencias sector eléctrico                                                                         | Ley 99/93, art. 45                                   | 6% rentas brutas                                                   | n.a.                                                   |
| Derechos otorgamiento licencias, permisos, autorizaciones, concesiones y salvoconductos                 | Ley 99 de 1993                                       | 100%                                                               | n.a.                                                   |
| Incentivos tributarios                                                                                  | Estatuto Tributario                                  | 20% renta líquida                                                  | n.a.                                                   |
| Otras fuentes: cooperación técnica, reconversión industrial, producción más limpia y créditos FINDETER. | Ley 99 de 1993.                                      | n.d.                                                               | n.a.                                                   |

n.d.: no definido; n.a.: no aplica

Expediente No. 25000-23-27-000-2001-0479-01  
Acumulados Nos. 2000-0428, 2001-0122, 2001-0343  
Actor: GUSTAVO MOYA ÁNGEL Y OTROS  
Acción Popular

- Documento CONPES 3463 de 12 de marzo de 2007, "Planes Departamentales de Agua Y Saneamiento para el Manejo Empresarial de los servicios de Acueducto, Alcantarillado y Aseo".

Este documento resalta la importancia de la coordinación interinstitucional al interior de cada nivel y en relación con el Gobierno, en los siguientes términos, así como las fuentes de financiación:

"Los Planes Departamentales de Agua y Saneamiento para el Manejo Empresarial de estos servicios, son la estrategia del Estado para acelerar el crecimiento de las coberturas y mejorar la calidad de los servicios, al facilitar el cumplimiento de los siguientes lineamientos de política: (i) efectiva coordinación interinstitucional al interior de cada nivel y entre diferentes niveles de gobierno, (ii) acelerar el proceso de modernización empresarial del sector en todo el territorio nacional, (iii) aprovechar economías de escala mediante la estructuración de esquemas regionales de prestación, (iv) articular las diferentes fuentes de recursos y facilitar el acceso del sector a crédito; (v) ejercer un mejor control sobre los recursos y el cumplimiento de la regulación, y (vi) contar con planes de inversión integrales con perspectiva regional, de corto, mediano y largo plazo".

El éxito de los Planes Departamentales de Agua y Saneamiento dependerá de la eficiente y coordinada interacción entre los actores involucrados, donde los Departamentos serán los líderes del proceso, y articuladores entre el Gobierno Nacional y los actores locales.

Principios de los Planes Departamentales

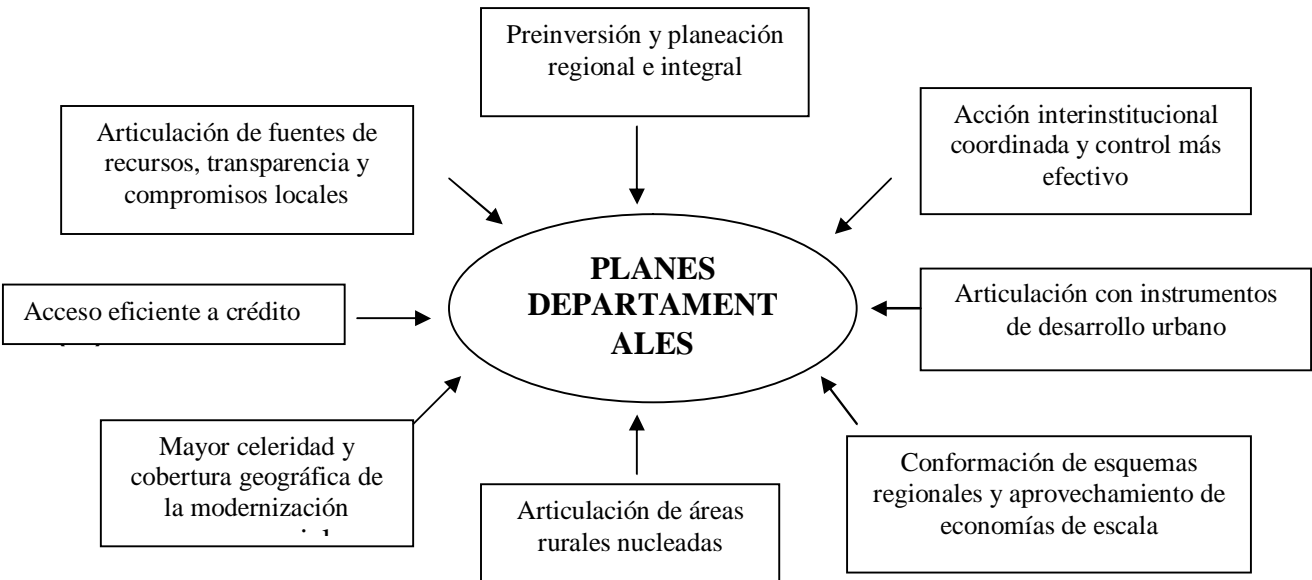

Expediente No. 25000-23-27-000-2001-0479-01  
Acumulados Nos. 2000-0428, 2001-0122, 2001-0343  
Actor: GUSTAVO MOYA ÁNGEL Y OTROS  
Acción Popular

El Plan Departamental se financiará principalmente con aportes del Departamento, los municipios, las Corporaciones Autónomas Regionales y con aportes de la Nación, como complemento al esfuerzo local y regional, y de acuerdo con los cupos de endeudamiento autorizados por las respectivas Asambleas Departamentales. El diseño del mecanismo financiero e institucional para su financiamiento deberá garantizar la adecuada articulación de las diferentes fuentes de recursos (cuadro 2), y un esquema de financiamiento óptimo que esté de acuerdo con el marco legal vigente y esté incluido en los análisis de la calificadora de riesgo crediticio con que cuente el departamento para la operación.

| Fuente                                | Tipo           | Beneficiarios                  | Requisitos                                                                                                      |
|---------------------------------------|----------------|--------------------------------|-----------------------------------------------------------------------------------------------------------------|
| Regalías                              | Directas       | Departamento, municipios       | • Autorización Asamblea (Ordenanza)                                                                             |
|                                       | Escalonadas    | Departamento                   | • Ventanilla Única<br>• Autorización Asamblea (Ordenanza)<br>• Aprobación Consejo Asesor de Regalías            |
|                                       | Indirectas     | Departamento, municipios       | • Ventanilla Única<br>• Aprobación Consejo Asesor de Regalías y autorización Concejos municipales               |
| Ley 715/2001                          | Transferencias | Municipios                     | • Acuerdo de Concejo Municipal                                                                                  |
| Crédito                               | Externo        | Entidades territoriales        | • Cumplimiento indicadores Ley 358 de 1997, 617 de 2000 y 819 de 2003<br>• Aval de la Nación para endeudamiento |
|                                       | Local          | Entidades territoriales        | • Línea de crédito de Tasa compensada Findeter<br>• Cumplimiento indicadores Ley 358 de 1997 y 617 de 2000      |
| CARs                                  | Regional       | Entidades territoriales        | • Aprobación Consejo Directivo                                                                                  |
| PGN (Audiencias Públicas Consultivas) | Nacional       | Departamentos                  | • Audiencias Públicas Consultivas<br>• Aprobación Vigencias Futuras (cuando se requiera)                        |
| Tarifas                               | Local          | Empresas de Servicios Públicos | • Esquema Tarifario Vigente                                                                                     |

Expediente No. 25000-23-27-000-2001-0479-01  
Acumulados Nos. 2000-0428, 2001-0122, 2001-0343  
Actor: GUSTAVO MOYA ÁNGEL Y OTROS  
Acción Popular

Fuente: CONPES 3463.

- Documento CONPES 3631 de fecha 14 de diciembre de 2009, "Garantía de la Nación a la Corporación Autónoma Regional de Cundinamarca - Car - para contratar una operación de Crédito Público Externo con la Banca Multilateral destinado a financiar parcialmente el Proyecto Adecuación Hidráulica Y Recuperación Ambiental del Río Bogotá".

Este documento presenta los antecedentes y avances sobre el programa de saneamiento del Río Bogotá (Conpes 3320 de 2004) y la descripción de las obras y estudios a financiar con esta operación de crédito.

Los principales componentes del proyecto presentado en este documento son: i) Adecuación Hidráulica del Río Bogotá, y ii) Ampliación y Optimización de la Planta de Tratamiento de Aguas Residuales, PTAR Salitre, los cuales hacen parte de la estrategia y del plan de acción del Conpes 3320 de 2004.

Finalmente, menciona que el saneamiento del Río Bogotá ha sido prioridad explícita en los dos últimos Planes de Desarrollo Nacional, en donde se incentivan Megaproyectos Estratégicos para el saneamiento de las cuencas de los ríos Bogotá, Medellín, Cauca y Chicamocha, los cuales se desarrollan en el marco del Programa de Saneamiento de Vertimientos -SAVER, diseñado por el MAVDT como estrategia para el logro de los objetivos de la política sectorial y el cumplimiento de los Objetivos de Desarrollo del Milenio -ODM- (Conpes 091 de 2005).

En cuanto a los avances financieros anota:

**"Avance en aspectos financieros:**

Con la realización de los estudios para el dimensionamiento de algunas de las inversiones más importantes, y de acuerdo con la información reportada por las entidades involucradas, de manera conjunta se han estimado las inversiones requeridas

Expediente No. 25000-23-27-000-2001-0479-01  
Acumulados Nos. 2000-0428, 2001-0122, 2001-0343  
Actor: GUSTAVO MOYA ÁNGEL Y OTROS  
Acción Popular

para el programa de Saneamiento del Río Bogotá, las cuales ascienden a \$5.38 billones (pesos de 2009). El siguiente esquema muestra los costos aproximados del programa para el saneamiento del Río, conforme a las inversiones incluidas en cada uno de estos grandes componentes.

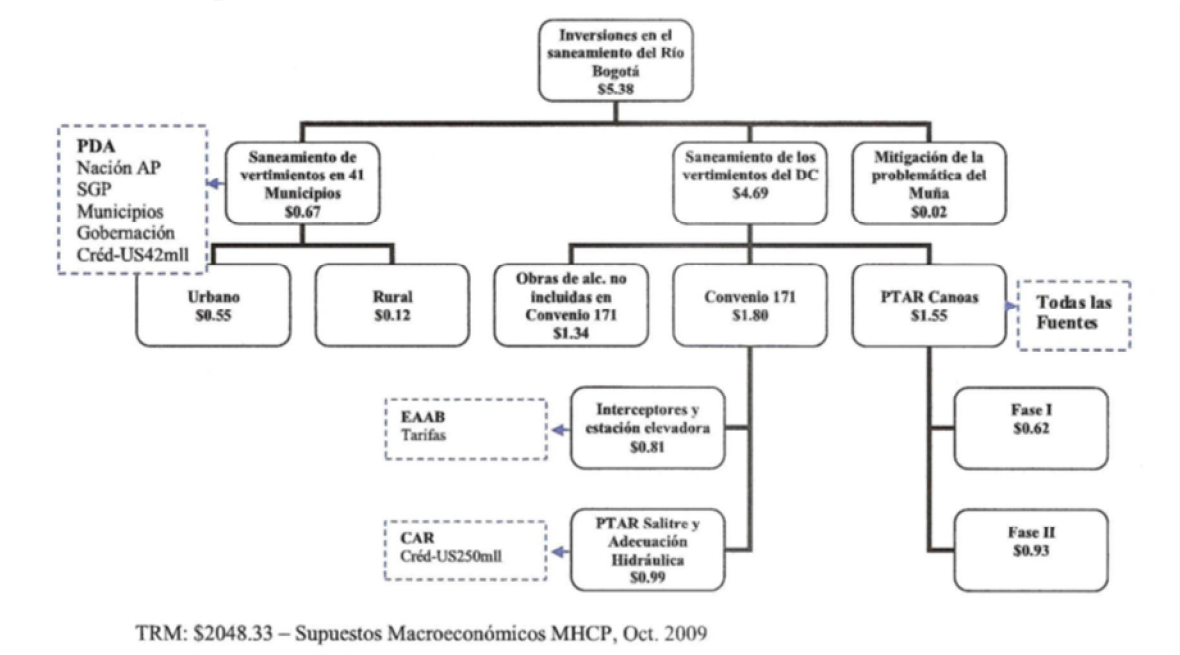

Estos avances fueron actualizados en cuadro remitido por el DNP en virtud de reunión informal en la cual se solicitó la actualización del mismo, el 6 de marzo de 2014:

Componentes del Programa de Saneamiento del Río Bogotá

Datos estimados con base en información de las entidades (COL \$Billones de 2010)\*

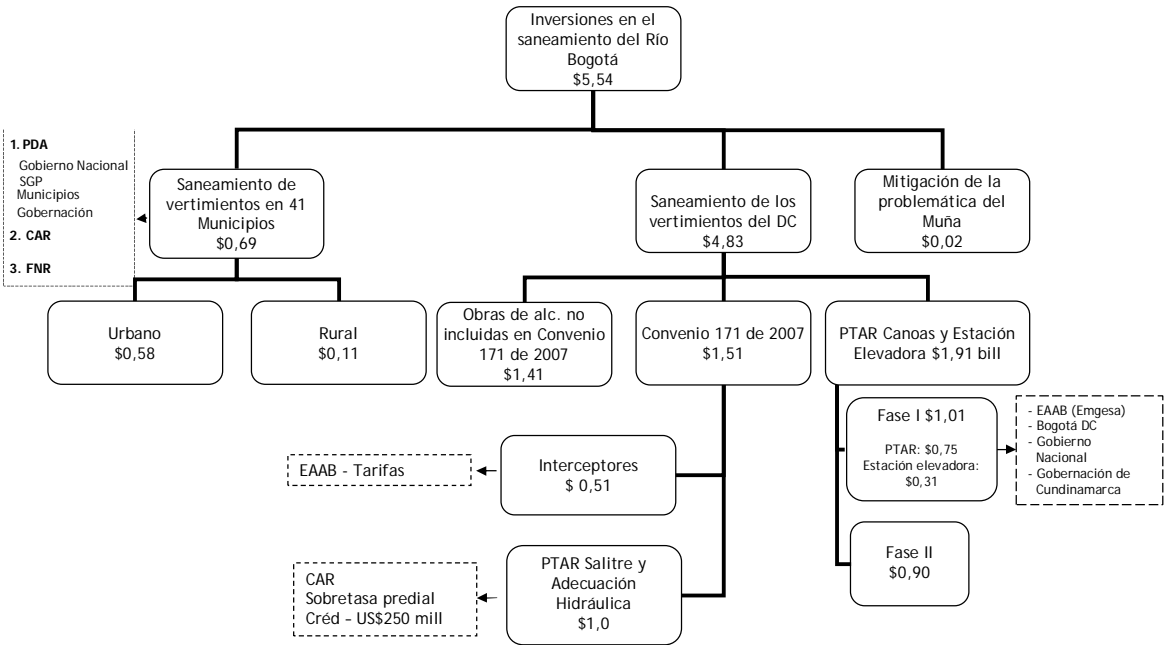

\* Los montos de inversión son preliminares con información a 2013 suministrada por entidades y están sujetos a estudios y diseños. Fuentes: EAAB ESP, CAR, MVCT, Gobernación de Cundinamarca, Alcaldía Mayor de Bogotá, DNP.

Expediente No. 25000-23-27-000-2001-0479-01  
Acumulados Nos. 2000-0428, 2001-0122, 2001-0343  
Actor: GUSTAVO MOYA ÁNGEL Y OTROS  
Acción Popular

*I.4.4.12.5. LOS CONVENIOS Y ACUERDOS*

- **Convenio 171 de 26 de junio de 2007.**

**"Convenio interadministrativo entre la Corporación Autónoma Regional de Cundinamarca-CAR-, Distrito Capital-Secretaría de Ambiente y Empresa de Acueducto y Alcantarillado de Bogotá".**

El objeto de este Convenio consistió en: "aunar esfuerzos para contribuir al logro del saneamiento ambiental del río Bogotá en el marco del que se ha denominado "Mega proyecto río Bogotá".

Los proyectos del Convenio fueron:

1.- Con cargo al Fondo para las Inversiones Ambientales en la cuenca del río Bogotá -FIAB, el tratamiento de las aguas residuales de las cuencas de los ríos Salitre, Torca y Jaboque en el sitio denominado PTAR Salitre y su conducción final hasta el distrito de riego de La Ramada; adecuación hidráulica del río Bogotá y sus obras complementarias y los demás proyectos que se definan de común acuerdo por las partes.

2.- Con recursos del D.C. y/o la EAAB, las obras para el manejo de caudales de la cuenca del río Salitre interceptores Engativá-Cortijo, Fucha-Tunjuelo y Tunjuelo Canoas, estaciones elevadoras de Tunjuelo y Canoas y obras complementarias, así como la construcción y operación de la PTAR CANOAS.

Deja expresa constancia en el parágrafo 1º que en todo caso la construcción de la PTAR Canoas se adelantará una vez se cuente con el cierre financiero correspondiente conforme a los recursos que para el efecto asigne la Nación.

**Recursos del convenio:** en la cláusula cuarta previó como tales:

Expediente No. 25000-23-27-000-2001-0479-01  
 Acumulados Nos. 2000-0428, 2001-0122, 2001-0343  
 Actor: GUSTAVO MOYA ÁNGEL Y OTROS  
 Acción Popular

- 1) Los recursos actualmente existentes en el Fondo para las Inversiones Ambientales en la cuenca del río Bogotá -FIAB-, respaldados con el certificado de disponibilidad presupuestal No. 891 de 26 de junio de 2007 y los que ingresen al mismo hasta cumplir el objetivo del convenio.
- 2) Los recursos provenientes de las tasas retributivas del Distrito Capital (arts. 43 y 66 de la Ley 99 de 1993);
- 3) Los recursos de destinación específica definidos por ley 715 de 2001, que aporte el DC.
- 4) Las tarifas de prestación del servicio público domiciliario de alcantarillado y los demás recursos que las partes asignen de común acuerdo.

El plazo para la ejecución de las obras se consignó en la cláusula octava en la cual se definió que los proyectos objeto del convenio se ejecutarán en los plazos previstos en los documentos técnicos y en todo caso acorde con la disponibilidad de recursos. La vigencia del Convenio se fijó hasta el año 2021, sin perjuicio de ser prorrogado o modificado de común acuerdo por las partes, antes de su vencimiento a través de la respectiva acta.

- **Acuerdo de Cooperación para la construcción de la planta de tratamiento de aguas residuales de Canoas (Fase I y II) y su estación elevadora dentro del programa de saneamiento del río Bogotá, en el contexto de la región capital, Bogotá-Cundinamarca. (21 de febrero de 2011).**

En los anexos financieros se describen de manera general cada una de las fuentes de recursos para la financiación de la PTAR CANOAS y su estación elevadora, y en los casos pertinentes los estimativos que las partes vinculadas al proyecto han identificado.

#### **Provenientes de Bogotá D.C.**

**1.- Sistema General de participaciones -SGP Ley 1176 de 2007,** art. 6 numeral 2 y parágrafo: 100% de la participación de Bogotá en la distribución del SGP sectorial para departamentos, período 2011-2040.

Expediente No. 25000-23-27-000-2001-0479-01  
Acumulados Nos. 2000-0428, 2001-0122, 2001-0343  
Actor: GUSTAVO MOYA ÁNGEL Y OTROS  
Acción Popular

**2.- Recursos del Sistema General de Participaciones -SGP Ley 1176 de 2007,** provenientes de la participación de Bogotá en la distribución del SGP sectorial como municipio entre los años 2011 y 2040 cuando exista saldo positivo entre los recursos asignados y el valor del déficit entre subsidios y aportes solidarios.

**3.- Recursos del Fondo Cuenta Río Bogotá** administrados por la Secretaría de Hacienda Distrital que corresponden a \$150.542 millones a diciembre 31 de 2010.

**4.- 100% de las transferencias del sector eléctrico a Bogotá D.C., Ley 99 de 1993 artículo 45,** para el período 2011 al 2040.

**5.- Aporte de la Empresa de Acueducto y Alcantarillado de Bogotá E.S.P. EAAB,** para el período 2011 al 2040 estimado en \$2.058 millones de 2010 por año.

**6.- Recursos del presupuesto de la EAAB** por valor de hasta \$314.000 millones de pesos 2010 para la construcción de la PTAR CANOAS y su Estación Elevadora. Cuando la Nación concorra en la financiación de esta estación elevadora, con los recursos descritos en el presente documento, la EAAB se compromete a destinar un monto igual al aporte de la Nación a la financiación de la PTAR Canoas Fase I.

**7.- La EAAB** gestionará recursos por un valor de \$84.048 millones (pesos de 2010) para la construcción de la Estación Elevadora Canoas a través de un convenio que suscriba con EMGESA S.A. E.S.P., condicionado al pronunciamiento que haga la CAR sobre la solicitud de ampliación en tiempo de la concesión de agua del río Bogotá que presente EMGESA, de conformidad con los estudios hidráulicos e hidrológicos y la normatividad vigente, de manera tal que se recupere la inversión.

**8.- Tarifas** Los costos de operación y mantenimiento de las plantas de tratamiento se incorporarán en las tarifas de servicios públicos domiciliarios de alcantarillado de conformidad con las normas legales, con excepción de los costos de operación y mantenimiento de la estación elevadora y los costos de energía de la PTAR Canoas que serán asumidos

Expediente No. 25000-23-27-000-2001-0479-01  
 Acumulados Nos. 2000-0428, 2001-0122, 2001-0343  
 Actor: GUSTAVO MOYA ÁNGEL Y OTROS  
 Acción Popular

por EMGESA, una vez se defina la ampliación de la concesión de agua del río Bogotá para la generación de energía.

**Provenientes de la Corporación Autónoma Regional -CAR.**

**1.- Recaudo Impuesto Predial Bogotá,** 48% recursos correspondientes al porcentaje ambiental del total del recaudo del impuesto predial de Bogotá, una vez se liberen los recursos comprometidos por el Acuerdo 171 de 2007, incluyendo rendimientos financieros. El 2% restante se destinará a la operación y mantenimiento de las obras de adecuación hidráulica Río Bogotá.

**2.- Rendimientos financieros** Las inversiones adicionales de adecuación hidráulica en la cuenca media del río Bogotá, no previstas en el Convenio 171 podrán financiarse entre otras fuentes, con los rendimientos financieros del 50% del porcentaje ambiental total del recaudo de impuesto predial Bogotá generados entre 2012 y 2025, de acuerdo con las normas que regulan la materia.

**Provenientes de La Nación**

**Los recursos provendrán de las siguientes fuentes:**

**1.- Del presupuesto general de la Nación:** 100% cupo indicativo asignado a Bogotá D.C. Decreto 3170 de 2008 que equivale a \$39.370 millones (de pesos 2010).

**2.- Del presupuesto General de la Nación:** \$28.144 millones de 2010 para la financiación de la primera fase de la PTAR CANOAS y su Estación Elevadora.

**3.- Del Fondo Nacional de Regalías:** previo cumplimiento requisitos de ley y presentación de los respectivos proyectos, se asignarán los siguientes recursos:

- Recursos previstos en el numeral 3 parágrafo 5, art. 1, Ley 141 de 1994, período 2011-2014.
- Desacumulación del Stock del FNR: \$53.653 millones para la vigencia 2011, previa aprobación del Consejo Nacional de Regalías.
- El D.C. deberá para estos efectos presentar el respectivo proyecto al Consejo Nacional de Regalías en 2011. La Nación adelantará los respectivos

**Expediente No. 25000-23-27-000-2001-0479-01**  
**Acumulados Nos. 2000-0428, 2001-0122, 2001-0343**  
**Actor: GUSTAVO MOYA ÁNGEL Y OTROS**  
**Acción Popular**

trámites para el efecto, esto es, con aportes con cargo al FNR o como un posible pasivo dentro del proceso de liquidación del FNR, el mecanismo que lo sustituya, o con otros recursos del presupuesto nacional, hasta el equivalente de \$113 mil millones de 2010, entre 2012 y 2014.

- El incentivo tributario, artículo 424-5 (numeral 4) y 428 literal f del Estatuto Tributario, previo cumplimiento requisitos legales, la Nación previa revisión del MAVDT certificará la exclusión tributaria correspondiente.

#### **Provenientes de la Gobernación de Cundinamarca**

El monto de \$3.180 millones anuales de 2010 durante el período 2010-2029 a través del Plan Departamental de Agua y Saneamiento de Cundinamarca (incluye los recursos del SGP del municipio de Soacha). Sujeto a las normas de procedimiento y vigencias futuras y las que se expidan sobre el particular.

#### **Fuentes de recursos adicionales**

La Nación, el Distrito Capital, la EAAB ESP y la Gobernación de Cundinamarca, acuerdan analizar otras fuentes de recursos adicionales para acelerar en el tiempo las inversiones para el tratamiento secundario.

Los recursos provenientes de las tasas retributivas se destinarán para el saneamiento del río Bogotá. El cálculo de las tasas retributivas estará sujeto a revisión por parte del MAVDT.

- **Convenio Interadministrativo de Cooperación suscrito entre el Ministerio de Vivienda, Ciudad y Territorio, la Alcaldía Mayor de Bogotá Distrito Capital y la Empresa de Acueducto y Alcantarillado de Bogotá E.S.P. (Diciembre 5 de 2011).**

Objeto: "Aunar esfuerzos entre el Distrito Capital, el Ministerio de Vivienda, Ciudad y Territorio y la EAAB E.S.P. para la ejecución del proyecto "Construcción de la Estación Elevadora de Aguas Residuales de Canoas para el Distrito

Expediente No. 25000-23-27-000-2001-0479-01  
 Acumulados Nos. 2000-0428, 2001-0122, 2001-0343  
 Actor: GUSTAVO MOYA ÁNGEL Y OTROS  
 Acción Popular

Capital de Bogotá" a realizarse en el municipio de Soacha departamento de Cundinamarca. Ejecutor: EAAB; la Nación se compromete a aportar los recursos del Convenio, así:

**Presupuesto del convenio:** \$207.145.743.085 M/L, los cuales provendrán del presupuesto nacional vigencias futuras con rubro 670-1200-002 según autorización de cupos de vigencias futuras excepcionales de inversión expedida por el Ministerio de Hacienda y Crédito Público, oficio 1-2011-075818, radicación 2-2011-042228 de 21 de diciembre de 2011, en la siguiente forma:

- \$41.261.682.919 pesos M/L de la vigencia 2012
- \$30.000.000.000 pesos M/L de la vigencia 2013 y,

Por la EAAB:

- \$135.884.060.166 pesos M/L soportados en el CDP No. 1600013810 de 5 de diciembre de 2011, \$19.963.189.538 M/L CDP No. 1600013811 de 1 de enero de 2012, por valor de \$104.806.745.074 M/L, CDP 1600013812 de fecha 5-12-11 por valor de \$1.778.260.089 M/L y CDP No 1600013810 de 1-1-12 por valor de \$9.335.865.465 M/L.

Los recursos serán desembolsados de acuerdo con el esquema fiduciario que contrate el ejecutor, así:

- Primer desembolso 30%, una vez perfeccionado el convenio, constituido el encargo fiduciario y establecidos los procedimientos para los desembolsos.
- La suma restante en máximo dos desembolsos de acuerdo con lo establecido por el Comité fiduciario y de acuerdo con las necesidades de los contratos derivados.

Desembolsos del Ministerio:

- De acuerdo con la aprobación del Programa Anual Mensualizado de Caja (PAC) y con la situación de los Fondos del Tesoro.

Expediente No. 25000-23-27-000-2001-0479-01  
Acumulados Nos. 2000-0428, 2001-0122, 2001-0343  
Actor: GUSTAVO MOYA ÁNGEL Y OTROS  
Acción Popular

Como los bienes adquiridos o construidos son propiedad del DC de conformidad con el convenio, razón por la cual se aplica el artículo 89.9 de la Ley 142 de 1994, el valor de los recursos aportados por el Ministerio no pueden ser incluidos en el cálculo de las tarifas que hayan de cobrarse a los usuarios de los estratos que pueden recibir subsidios, según lo dispuesto en la ley.

- **Convenio Interinstitucional entre la Empresa de Acueducto y Alcantarillado de Bogotá ESP y EMGESA S.A. ESP. (Diciembre de 2011).**

Objeto: *"Aunar esfuerzos para garantizar la construcción de la Estación Elevadora de Canoas, mediante aporte económico y de operación que ofrece EMGESA, en los términos y condiciones que se establecen en el presente convenio".*

**Recursos económicos del Convenio:** la suma de OCHENTA Y CUATRO MIL CUARENTA Y OCHO MILLONES DE PESOS CORRIENTES (\$84.048.000.000) DE DICIEMBRE DE 2010, que EMGESA aportará para efectos de hacer viable financieramente la construcción de la Estación Elevadora de Canoas, aporte condicionado a la ampliación de la concesión de aguas solicitada por EMGESA en los términos del Decreto 1541 de 1978, artículo 38, en un plazo similar, en condiciones que resulten económicamente rentables y socialmente benéficas y se encuentre construida y en operación la Estación Elevadora de Canoas.

De otra parte, la EAAB de acuerdo con la ejecución del Programa de Saneamiento Río Bogotá, presentó memorial obrante al folio 10926 cuaderno 16, de fecha julio 19 de 2012, en el cual se señala en el numeral 7 la situación financiera actual, en atención al requerimiento hecho por el Consejo de Estado:

*"Financiación - situación actual, la EAAB observa que "(...) las fuentes para financiar la construcción de las obras*

Expediente No. 25000-23-27-000-2001-0479-01  
Acumulados Nos. 2000-0428, 2001-0122, 2001-0343  
Actor: GUSTAVO MOYA ÁNGEL Y OTROS  
Acción Popular

faltantes suman un total de \$2.700.888 millones de pesos, de los cuales 41,2% corresponde al Distrito Capital, 45,7% a la CAR, 11,2% a la Nación y 1,9% al Departamento de Cundinamarca. Estos fondos incluyen el compromiso incierto de EMGESA.

En la tabla que se inserta a continuación se consignan las fuentes y compromisos financieros para inversión en el Programa del río Bogotá (actualizados a 2012).

**Tabla 17. Fuentes y compromisos financieros para inversión en el Programa del río Bogotá (actualizados a 2012)**

| Fuente<br>financiación<br>s/acuerdo<br>cooperación<br>(21-02-2011) | Período   | Valor<br>millones | Destinación<br>específica | Condiciones   |
|--------------------------------------------------------------------|-----------|-------------------|---------------------------|---------------|
| 1. BOGOTÁ                                                          |           | 1.112.854         | 41.2%                     |               |
| 1.1. SGP Ley 1176/07, art. 6 num. 2                                | 2011-2040 | 566.114           |                           |               |
| 1.2. Fondo cuenta del RB                                           |           | 156.424           |                           |               |
| 1.3. Transferencias del sector eléctrico Ley 99/93, art. 45        | 2011-2040 | 11.507            |                           |               |
| 1.4. Excedentes financieros EAAB s/SDH                             | 2011-2040 | (91.057)          |                           | Por confirmar |
| 1.5. Aportes EAAB                                                  | 2011-2040 | 53.385            | PTAR Y EE                 |               |
| 1.6. Presupuesto o EAAB Convenio 171/07                            |           | 4.508             | PTAR y EE                 | Por confirmar |
| 1.7. Aporte D.C. (propuesta)                                       |           | 46.400            | PTAR y EE                 |               |
| 1.8. Presupuesto                                                   |           | 135.884           |                           |               |

Expediente No. 25000-23-27-000-2001-0479-01  
Acumulados Nos. 2000-0428, 2001-0122, 2001-0343  
Actor: GUSTAVO MOYA ÁNGEL Y OTROS  
Acción Popular

|                                                                                                      |           |            |                                    |                                          |
|------------------------------------------------------------------------------------------------------|-----------|------------|------------------------------------|------------------------------------------|
| EAAB<br>(Cofinanciación convenio 9-07-25500-0869-2011 MVCT y Acuerdo 071/11 DNP                      |           |            |                                    |                                          |
| 1.7. EMGESA convenio EAAB No. 9-07-10200-0688-2011                                                   |           | 87.183     | EEC (indexado 3.73)O&M excepto EEC | Concesión aguas CAR devolución en bienes |
| 1.8. Tarifas alcantarillado                                                                          |           | 51.450     | O&M excepto EEC                    |                                          |
| 1.9. EMGESA convenio con EAAB No. 9-07-10200-0668-2011.                                              |           | (122.784 ) | O&M EEC y Energía                  | Concesión aguas CAR                      |
| 2. CAR                                                                                               |           | 1.235.757  | 45,7%                              |                                          |
| 2.1.Porcentaje ambiental Bogotá Ley 99/93 y rendimientos                                             | 2025-2040 | 1.235.757  |                                    | Convenio 171/07                          |
| 3. NACION                                                                                            |           | 302.060    | 11.2%                              |                                          |
| 3.1.Excención tributaria equipos y maquinaria tratamiento de aguas residuales                        |           | 110.583    |                                    |                                          |
| 3.2. Presupuesto nacional cupo indicativo Bogotá Dcto. 3170/08, Ley 1151/07 Convenio 907-25500-0569- |           | 41.262     | EEC construcción                   |                                          |

Expediente No. 25000-23-27-000-2001-0479-01  
Acumulados Nos. 2000-0428, 2001-0122, 2001-0343  
Actor: GUSTAVO MOYA ÁNGEL Y OTROS  
Acción Popular

|                                                                                                                  |               |               |                     |                              |
|------------------------------------------------------------------------------------------------------------------|---------------|---------------|---------------------|------------------------------|
| 2011 (1)                                                                                                         |               |               |                     |                              |
| 3.3.<br>Presupuesto<br>Nacional pre-<br>aprobados<br>CONFIS 2011-<br>13-Convenio 9-<br>07-25500-869-<br>2011 (1) |               | 30.000        | EEC<br>construcción |                              |
| 4.Fondo<br>Nacional<br>Regalías FNR<br>(Acuerdo<br>071/11)DNP (1)                                                |               | 120.215       | EEC<br>construcción |                              |
| 5.-<br>GOBERNACIÓN DE<br>CUNDINAMARCA                                                                            |               | 50.217        | 1.9%                |                              |
| 5.1. PDA<br>incluye SGP<br>Soacha                                                                                | 2010-<br>2029 | 50.217        |                     | Normas vigentes<br>y futuras |
| Total<br>Financiación                                                                                            |               | 2.700.88<br>8 | 100%                |                              |

En documento obrante a folio 12210, la Empresa de Acueducto y Alcantarillado de Bogotá informó sobre el avance del "Proyecto Construcción de la Estación Elevadora de Aguas Residuales Canoas para el Distrito Capital de Bogotá", en los siguientes términos:

La estación elevadora no está construida. Ella fue objeto de diseño básico dentro del contrato No. 1-02-26100-711-200 cuyo objeto fue "Diseño de Ingeniería Básica del Interceptor Tunjuelo-Canoas, Estación Elevadora de Canoas y Emisario Canoas Alicachín en la ciudad de Bogotá y el municipio de Soacha". No obstante, no cuenta con diseño detallado para construcción.

Los recursos del mencionado proyecto fueron aprobados en el año 2011 por un valor total de \$327.360.743.085 con aportes por el 58% de la Nación y del 42% de la EAAB.

"Con el objeto de cumplir con el lleno de requisitos para el desembolso de los recursos de la Nación, se han remitido, tanto al Ministerio de Vivienda, Ciudad

Expediente No. 25000-23-27-000-2001-0479-01  
Acumulados Nos. 2000-0428, 2001-0122, 2001-0343  
Actor: GUSTAVO MOYA ÁNGEL Y OTROS  
Acción Popular

y Territorio, como al Fondo Nacional de Regalías, los documentos técnicos y administrativos requeridos. El único documento que aún no se ha remitido, tanto al Ministerio de Vivienda, Ciudad y Territorio, como al Fondo Nacional de Regalías, son los términos de referencia para la contratación del mencionado proyecto. Lo anterior debido a que aún existe incertidumbre jurídica en relación con la construcción de la estación elevadora, obra que beneficia únicamente al sector de generación eléctrica, y no al saneamiento del Río Bogotá.

(...)

3.5. Informe sobre el estado de diseño de la planta de Tratamiento de Canoas.

Con fecha 7 de diciembre de 2011, se suscribió el contrato No. 1-02-25500-0690-2011, por un valor total de \$25.720.406.841 y un plazo de 26 meses, con consorcio CDM - INGESAM, conformado por las firmas INGESAM LTDA. Y CAMP DRESSER & MCKEE INC., cuyo objeto es, Realizar el diseño a nivel de ingeniería de detalle de la planta de tratamiento de aguas residuales de Canoas en los componentes asociados al sistema de tratamiento primario con asistencia química".

Actualmente, se ha realizado la revisión de todos los requisitos previos para la firma del acta de inicio, a cuyo respecto se ha determinado la No objeción tanto al Plan de Calidad como la planificación de recibo de producto. La suscripción del acta de inicio se encuentra pendiente y se realizará una vez se cuente con la interventoría especializada internacional, la cual está en proceso de contratación.

3.6.- Informe sobre el estado de avance de los términos de referencia para contratar la construcción de la PTAR Canoas.

Los términos de referencia (pliegos) para contratar la construcción de la PTAR Canoas es uno de los productos esperados del contrato No. 1-02-25500-0690-2011, suscrito con el consorcio CDM-INGESAM, por lo cual sólo se dispondrá de ellos dentro de 26 meses, luego de iniciados los mencionados diseños.

3.7.- Enviar los estudios realizados a la fecha en relación con la definición de la alternativa a seguir para el programa de saneamiento del Río Bogotá.

Los estudios económicos y financieros son:  
Estudios realizados entre el 2000 y 2003

**Expediente No. 25000-23-27-000-2001-0479-01**  
**Acumulados Nos. 2000-0428, 2001-0122, 2001-0343**  
**Actor: GUSTAVO MOYA ÁNGEL Y OTROS**  
**Acción Popular**

- Giraldo López, C.A. (Julio 2003). COMPORTAMIENTO DE LA CUENCA MEDIA DEL RIO BOGOTA CON CAUDALES BAJOS. Bogotá, Cundinamarca, Colombia.
- UniandesU.d., & EAAB E.S.P., E.d. (Diciembre de 2002) PROYECTO DE MODELACION DE LA CALIDAD DEL AGUA DEL RIO BOGOTA, Bogotá, Cundinamarca, Colombia.
- UTSB, UT (Septiembre de 2000). DEFINICION DE LOS LINEAMIENTOS PARA CONTINUAR CON EL SANEAMIENTO DEL RIO BOGOTÁ, Bogotá, Cundinamarca, Colombia.
- UTSB UT (Abril 2002) Informe Población caudales y cargas contaminantes, Bogotá, Cundinamarca, Colombia.
- UTSB UT (2003) Programa de Saneamiento del río Bogotá-Definición de las alternativas a seguir, Bogotá, Cundinamarca, Colombia.

#### **Estudios realizados entre 2005 y 2011**

- Consorcio HMV-IEHG-EAAB Diseño de ingeniería básica del interceptor Tunjuelo-Canoas Contrato No. 1-01-25100-711-2005. Análisis de alternativas para la entrega del último tramo del interceptor Río Bogotá, Bogotá 2007.

- Estudios Técnicos y construcciones LTDA-EAAB Consultoría para el estudio, verificación y recomendación sobre las especificaciones técnicas de los equipos electromecánicos, incluidos en la ingeniería básica realizada por la firma de consulta HMV Ingenieros Ltda. EIEH Grucon S.A. del interceptor Tunjuelo-Canoas-Alicachín incluyendo la estación elevadora de Canoas. Informe Final. Alternativa de ubicación PTAR Bogotá 2009.

Este estudio incluye un informe adicional sobre el aprovechamiento hidroeléctrico: ESTUDIOS TÉCNICOS Y CONSTRUCCIONES LTDA. - EAAB. Concepto sobre el aprovechamiento hidroeléctrico de las alternativas de ubicación de la segunda PTAR: Informe Final.

Estos dos estudios también incluyen análisis económico-financiero que les llevan a recomendar estudiar una alternativa diferente a Canoas. Para la estimación y actualización de costos se tuvo en cuenta el siguiente estudio:

- HAZEN AND SAWYER - NIPPON KOEI. Diseño y construcción de planta de tratamiento. El Salitre II Etapa. Presupuesto referencial. CAR. Bogotá. Octubre 2010

Los estudios ambientales, que incluyen los modelos hidrológicos, hidráulicos y de calidad del agua son:

**Expediente No. 25000-23-27-000-2001-0479-01**  
**Acumulados Nos. 2000-0428, 2001-0122, 2001-0343**  
**Actor: GUSTAVO MOYA ÁNGEL Y OTROS**  
**Acción Popular**

-Universidad Nacional de Colombia Modelación dinámica de la calidad del agua del río Bogotá. EAAB Contrato Interadministrativo No. 9-07-26100-1059-2008 EAAB-UN, Bogotá 2011.

"Este estudio contempló dos años de muestreos de calidad del agua a lo largo de todo el río, sus afluentes y vertimientos, y con base en estos monitoreos y mediciones de caudal, mediante la utilización de las herramientas computacionales MATLAB2009 y Simulink, desarrolló un modelo dinámico de calidad del agua, con escenarios que consideran diferentes condiciones de caudal, descargas y localización de las plantas de tratamiento.

(...) desde el punto de vista financiero la solución se encontraba (y se encuentra) carente de recursos que permitieran la contratación de las obras relacionadas con la construcción de los interceptores, (ya construidos) la estación elevadora y la PTAR Canoas. Es por eso que la EAAB interpuso el recurso de apelación ante el Consejo de Estado para que fuera esta corporación la que definiera las responsabilidades en cabeza de cada una de las partes involucradas en el proceso.

(...) el gobierno nacional sometió a consideración del Consejo Nacional de Política Económica y Social un conjunto de medidas orientadas a optimizar el manejo ambiental del río Bogotá, con el propósito de asegurar el cubrimiento de la demanda de bienes y servicios del río de manera sostenible. (Documento CONPES 3320), (...) que se confirma, si se tiene en cuenta que el Plan Nacional de Desarrollo 2010-2014 adoptado mediante la Ley 1450 de 2010, en el artículo 131 incluyó una disposición expresa relativa a las inversiones para el Programa de Saneamiento del Río Bogotá cualquiera sea el área de la cuenca media en la cual se realicen las inversiones.

(...)

Dentro de este contexto, procede analizar las fuentes de los recursos, su asignación y distribución, así como las entidades responsables dentro del marco normativo correspondiente.

#### **I.4.4.13. MARCO NORMATIVO**

**I.4.4.13.1. Referencias normativas que sustentan las fuentes de financiación**

**I.4.4.13.2. Fundamentos constitucionales y legales**

**Expediente No. 25000-23-27-000-2001-0479-01**  
**Acumulados Nos. 2000-0428, 2001-0122, 2001-0343**  
**Actor: GUSTAVO MOYA ÁNGEL Y OTROS**  
**Acción Popular**

- Acto Legislativo 4 de 2007
- Acto Legislativo 5 de 2011
- Leyes del "Plan Nacional de Desarrollo"
- Ley 812 de 2003, Plan Nacional de Desarrollo 2003-2006.
- Ley 1151 de 2007, Plan Nacional de Desarrollo 2006-2010.
- Ley 1450 de 2010, Plan Nacional de Desarrollo 2010-2014.

#### **I.4.4.13.3. Sistema Ambiental**

- La Ley 99 de 1993, "por la cual se crea el Ministerio del Medio Ambiente, se reordena el Sector Público encargado de la gestión y conservación del medio ambiente y los recursos naturales renovables, se organiza el Sistema Nacional Ambiental, SINA, y se dictan otras disposiciones".
- Decreto Ley 2811 de 1974

#### **I.4.4.13.4 Sistema general de participaciones**

- Ley 715 de 2001, Por la cual se dictan normas orgánicas en materia de recursos y competencias de conformidad con los artículos 151, 288, 356 y 357 (Acto Legislativo 01 de 2001) de la Constitución Política y se dictan otras disposiciones para organizar la prestación de los servicios de educación y salud, entre otros.
- Acto Legislativo 04 de 2007
- Ley 1176 de 2007
- CONPES 112 de febrero 5 de 2008, Distribución del Sistema General de Participaciones.

#### **I.4.4.13.5. Régimen jurídico de regalías**

- Ley 141 de 1994, Por la cual se crean el Fondo Nacional de Regalías, la Comisión Nacional de Regalías, se regula el derecho del Estado a percibir regalías por la explotación de recursos naturales no renovables, se establecen las reglas para su liquidación y distribución y se dictan otras disposiciones, modificada por las Leyes 756 de 2002 y 858 de 2003.
- Ley 1151 de 2007, Por la cual se expide el Plan Nacional de Desarrollo 2006-2010.

Expediente No. 25000-23-27-000-2001-0479-01  
Acumulados Nos. 2000-0428, 2001-0122, 2001-0343  
Actor: GUSTAVO MOYA ÁNGEL Y OTROS  
Acción Popular

- Acto Legislativo 5 de 2011
- Ley 1530 de 2012 "Por la cual se regula la organización y el funcionamiento del sistema general de regalías".

#### **I.4.4.13.6 Ordenamiento Territorial**

- Ley 388 de 1997, "Por la cual se modifica la Ley 9 de 1989 y la Ley 3 de 1991 y se dictan otras disposiciones", define los mecanismos para que el municipio, en ejercicio de su autonomía, promueva el ordenamiento de su territorio.
- Ley 1454 de 2011, Por la cual se dictan normas orgánicas sobre ordenamiento territorial y se modifican otras disposiciones.
- Ley 1551 de 2012, por la cual se dictan normas para modernizar la organización y el funcionamiento de los municipios.
- Decreto 3200 de 2008, Planes Departamentales de Agua y Saneamiento PDA -.
- Decreto 619/00, actualizado Decreto 469 de 2003 y Decreto 190 de 2004- Plan de Ordenamiento Territorial del Distrito Capital -POT.
- Decreto 1013 de 2005, Por el cual se establece la metodología para la determinación del equilibrio entre los subsidios y las contribuciones para los servicios públicos domiciliarios de acueducto, alcantarillado y aseo.
- Decreto 2667 de 2012, por el cual se reglamenta la tasa retributiva por la utilización directa e indirecta del agua como receptor de los vertimientos puntuales, y se toman otras determinaciones.
- Decreto Número 1200 de 2004, 20 de Abril De 2004, "Por el cual se determinan los Instrumentos de Planificación Ambiental y se adoptan otras disposiciones".
- Decreto 953 de 2013 que reglamenta el artículo 111 de la Ley 99 de 1993.
- Decreto 1640 de 2012, "Por el cual se reglamentan los instrumentos para la planificación, ordenación, y manejo de las cuencas hidrográficas y acuíferos y se dictan otras disposiciones".

Expediente No. 25000-23-27-000-2001-0479-01  
 Acumulados Nos. 2000-0428, 2001-0122, 2001-0343  
 Actor: GUSTAVO MOYA ÁNGEL Y OTROS  
 Acción Popular

**I.4.4.14. INSTRUMENTOS ECONÓMICOS A EMPLEAR PARA MATERIALIZAR LA SOLUCIÓN.**

*TASAS RETRIBUTIVAS Y POR USO DEL AGUA.- TARIFAS*

La Política Nacional para la gestión integral del recurso hídrico expedida por el Ministerio de Ambiente, Vivienda y Desarrollo Territorial, 2010, se refiere a los denominados "Instrumentos Económicos", como instrumentos regulatorios y de planificación del recurso hídrico.

Destaca dentro de este concepto de Instrumentos económicos en primer término las tasas retributivas y por uso del agua:

Las tasas retributivas y por uso del agua son consideradas dentro de la política como los instrumentos económicos más utilizados e implementados en nuestro país. Además este instrumento fue reglamentado por el Gobierno Nacional y aplicado en el territorio nacional por parte de las CAR a partir del año 1997 y éstas han contribuido a la gestión integral del recurso hídrico, generando beneficios públicos en términos de reducción de los niveles de cargas contaminantes a los cuerpos de agua.

La **tasa retributiva**, *"tiene por objeto cobrar por las consecuencias nocivas de la introducción u arrojado de desechos o de desperdicios agrícolas, mineros o industriales, aguas negras o servidas de cualquier origen, humos, vapores y sustancias nocivas que sean resultado de actividades antrópicas o propiciadas por el hombre o, actividades económicas o de servicio, sean o no lucrativas"*.<sup>210</sup>

**Tasa retributiva y compensatoria -Tarifas.**

Con la expedición de la Ley 99 de 1993, la tarifa de dichas tasas se sujetó al desarrollo del sistema y método de cálculo previsto en el artículo 42, hoy adicionado por el artículo 211 de la Ley 1450 de 2010, disposición que permite trasladar

---

<sup>210</sup>Política Nacional para la gestión integral del recurso hídrico, p.80.

Expediente No. 25000-23-27-000-2001-0479-01  
 Acumulados Nos. 2000-0428, 2001-0122, 2001-0343  
 Actor: GUSTAVO MOYA ÁNGEL Y OTROS  
 Acción Popular

los costos a quienes se beneficien por la utilización del agua.

El artículo 42 de la Ley 99 de 1993, señala las actividades sujetas al pago de tasas retributivas por las consecuencias nocivas que puedan generar, así como la posibilidad de fijar tasas para compensar los gastos de mantenimiento de renovación de los recursos naturales renovables; establece las reglas para calcular el cobro de las tasas retributivas y compensatorias y el método para fijar el monto tarifario por concepto de tasas retributivas y compensatorias.<sup>211</sup>

---

<sup>211</sup> **Artículo 42°.-Tasas Retributivas y Compensatorias.** La utilización directa o indirecta de la atmósfera, del agua y del suelo, para introducir o arrojar desechos o desperdicios agrícolas, mineros o industriales, aguas negras o servidas de cualquier origen, humos, vapores y sustancias nocivas que sean resultado de actividades antrópicas o propiciadas por el hombre, o actividades económicas o de servicio, sean o no lucrativas, se sujetará al pago de tasas retributivas por las consecuencias nocivas de las actividades expresadas.

También podrán fijarse tasas para compensar los gastos de mantenimiento de la renovabilidad de los recursos naturales renovables. Queda así subrogado el artículo 18 del Decreto 2811 de 1974.

Para la definición de los costos y beneficios de que trata el inciso 2o. del artículo 338 de la Constitución Nacional, sobre cuya base hayan de calcularse las tasas retributivas y compensatorias a las que se refiere el presente artículo, creadas de conformidad con lo dispuesto por el Código Nacional de Recursos Naturales Renovables y de Protección al Medio Ambiente, Decreto 2811 de 1974, se aplicará el sistema establecido por el conjunto de las siguientes reglas: a) La tasa incluirá el valor de depreciación del recurso afectado; b) El Ministerio del Medio Ambiente teniendo en cuenta los costos sociales y ambientales del daño, y los costos de recuperación del recurso afectado, definirá anualmente las bases sobre las cuales se hará el cálculo de la depreciación; c) El cálculo de la depreciación incluirá la evaluación económica de los daños sociales y ambientales causados por la respectiva actividad. Se entiende por daños sociales, entre otros, los ocasionados a la salud humana, el paisaje, la tranquilidad pública, los bienes públicos y privados y demás bienes con valor económico directamente afectados por la actividad contaminante. Se entiende por daño ambiental el que afecte el normal funcionamiento de los ecosistemas o la renovabilidad de sus recursos y componentes; d) El cálculo de costos así obtenido, será la base para la definición del monto tarifario de las tasas.

Con base en el conjunto de reglas establecidas en el sistema de que trata el inciso anterior, el Ministerio del Medio Ambiente aplicará el siguiente método en la definición de los costos sobre cuya base hará la fijación del monto tarifario de las tasas retributivas y compensatorias: a) A cada uno de los factores que incidan en la determinación de una tasa, se le definirán las variables cuantitativas que permitan la medición del daño; b) Cada factor y sus variables deberá tener un coeficiente que permita ponderar su peso en el conjunto de los factores y variables considerados; c) Los coeficientes se calcularán teniendo en cuenta la diversidad de las regiones, la disponibilidad de los recursos, su capacidad de asimilación, los agentes contaminantes involucrados, las condiciones socioeconómicas de la población afectada y el costo de oportunidad del recurso de que se trate; d) Los factores, variables y

Expediente No. 25000-23-27-000-2001-0479-01  
 Acumulados Nos. 2000-0428, 2001-0122, 2001-0343  
 Actor: GUSTAVO MOYA ÁNGEL Y OTROS  
 Acción Popular

Esta disposición fue adicionada por el artículo 211 de la Ley del Plan de Desarrollo 2010-2014, (Ley 1450 de 2011) así:

ARTÍCULO 211. *TASAS RETRIBUTIVAS Y COMPENSATORIAS.* Modifíquese y adiciónense los siguientes párrafos al artículo 42 de la Ley 99 de 1993:

**Parágrafo 1o.** Las tasas retributivas y compensatorias se aplicarán incluso a la contaminación causada por encima de los límites permisibles sin perjuicio de la imposición de las medidas preventivas y sancionatorias a que haya lugar. El cobro de esta tasa no implica bajo ninguna circunstancia la legalización del respectivo vertimiento.

**Parágrafo 2o.** Los recursos provenientes del recaudo de las tasas retributivas se destinarán a proyectos de inversión en descontaminación y monitoreo de la calidad del recurso respectivo. Para cubrir los gastos de implementación y seguimiento de la tasa, la autoridad ambiental competente podrá utilizar hasta el 10% de los recursos recaudados.

**Parágrafo 3o.** Los recursos provenientes del recaudo de las tasas compensatorias se destinarán a la **protección y renovación del recurso natural respectivo, teniendo en cuenta las directrices del Ministerio de Ambiente, Vivienda y Desarrollo Territorial**, o quien haga sus veces. Para cubrir gastos de implementación y seguimiento de la tasa, la autoridad ambiental podrá utilizar hasta el diez por ciento (10%) de los recaudos". (Se destaca9

El Decreto 2667 de 2012, por el cual se reglamenta la tasa retributiva por la utilización directa e indirecta del agua como receptor de los vertimientos puntuales, y se toman otras determinaciones, derogó el Decreto 3100 de 2003 y fue expedido ante la modificación hecha por el Plan de Desarrollo, Ley 1450 de 2011, al artículo 42 de la Ley 99 de 1993.

El reglamento en el artículo 20 dispuso:

**Artículo 20. Destinación del recaudo.** Los recaudos de la tasa retributiva por vertimientos al agua se **destinarán a proyectos de inversión en**

---

coeficientes así determinados serán integrados en fórmulas matemáticas que permitan el cálculo y determinación de las tasas correspondientes.

Expediente No. 25000-23-27-000-2001-0479-01  
Acumulados Nos. 2000-0428, 2001-0122, 2001-0343  
Actor: GUSTAVO MOYA ÁNGEL Y OTROS  
Acción Popular

**descontaminación hídrica y monitoreo de la calidad del agua.**

Para cubrir los gastos de implementación y seguimiento de la tasa, la autoridad ambiental competente podrá utilizar hasta el 10% de los recursos recaudados de la tasa retributiva.

**Para lo anterior, las autoridades ambientales competentes deberán realizar las distribuciones en sus presupuestos de ingresos y gastos a las que haya lugar para garantizar la destinación específica de la tasa.** (Se destaca)

El artículo 15 del mismo decreto dispuso:

Artículo 15. Tarifa mínima de la tasa retributiva (Tm). El Ministerio de Ambiente y Desarrollo Sostenible establecerá anualmente mediante resolución, el valor de la tarifa mínima de la tasa retributiva para los parámetros sobre los cuales se cobrará dicha tasa, basado en los costos directos de remoción de los elementos, sustancia o parámetros contaminantes presentes en los vertimientos líquidos, los cuales forman parte de los costos de recuperación del recurso afectado.

Parágrafo. Las tarifas mínimas de los parámetros objeto de cobro establecidas en la Resolución 273 de 1997 actualizada por la Resolución 372 de 1998, **continuarán vigentes hasta tanto el Ministerio de Ambiente y Desarrollo Sostenible las adicione, modifique o sustituya.**

De otra parte, la Resolución CRA 271 de 2003 "*Por la cual se modifica el Artículo 1.2.1.1 y la Sección 5.2.1 del Capítulo 2, del Título V de la Resolución CRA 151 de 2001*", establece el procedimiento único para el trámite de las modificaciones de carácter particular de las fórmulas tarifarias y/o del costo económico de referencia aplicables a los servicios públicos de acueducto, alcantarillado y aseo, cuando se presentan las siguientes causales: acuerdo entre la persona prestadora y la Comisión; graves errores en su cálculo que lesionan injustamente los intereses de los usuarios o de la persona prestadora, o; razones de caso fortuito o fuerza mayor que comprometan en forma grave la capacidad financiera de la persona prestadora para continuar prestando los servicios en las condiciones tarifarias previstas.

Expediente No. 25000-23-27-000-2001-0479-01  
 Acumulados Nos. 2000-0428, 2001-0122, 2001-0343  
 Actor: GUSTAVO MOYA ÁNGEL Y OTROS  
 Acción Popular

El Decreto 1013 de 2005 estableció la metodología para determinar el equilibrio entre subsidios y contribuciones.

La Comisión de Regulación de Agua Potable y Saneamiento Básico expidió la Resolución CRA 287 de 2004, modificada por la Resolución 306 de 2004, por la cual se establece la metodología tarifaria para regular el cálculo de los costos de prestación de los servicios de acueducto y alcantarillado, la cual tendrá vigencia de cinco años.

Estas disposiciones no han sido objeto de modificación por la autoridad competente, luego se encuentran vigentes hasta tanto haya un pronunciamiento distinto por la autoridad competente.

**Tasa por utilización de aguas:** Fue establecida en el Código de los Recursos Naturales y en el artículo 43 de la Ley 99 de 1993. *"Tiene por objeto cobrar por la utilización de las aguas directamente captadas de un cuerpo de agua, con el fin de destinar dichos recursos al pago de los gastos de protección y renovación de los recursos hídricos (...)"* (Política Nacional para la gestión del Recurso Hídrico, para los fines establecidos en el artículo 108 de la Ley 1051 de 2007, modificada por el artículo 216 de la Ley 1450 de 2010).

Las citadas disposiciones señalan:

**Artículo 43°.-** Reglamentado por el Decreto Nacional 155 de 2004. *Tasas por Utilización de Aguas.* La utilización de aguas por personas naturales o jurídicas, públicas o privadas, dará lugar al cobro de tasas fijadas por el Gobierno Nacional que se destinarán al pago de los gastos de protección y renovación de los recursos hídricos, para los fines establecidos por el artículo 159 del Código Nacional de Recursos Naturales Renovables y de Protección al Medio Ambiente, Decreto 2811 de 1974. El Gobierno Nacional calculará y establecerá las tasas a que haya lugar por el uso de las aguas.  
 El sistema y método establecidos por el artículo precedente para la definición de los costos sobre cuya base se calcularán y fijarán las tasas

Expediente No. 25000-23-27-000-2001-0479-01  
 Acumulados Nos. 2000-0428, 2001-0122, 2001-0343  
 Actor: GUSTAVO MOYA ÁNGEL Y OTROS  
 Acción Popular

retributivas y compensatorias, se aplicarán al procedimiento de fijación de la tasa de que trata el presente artículo.

El artículo 216 de la Ley 1450 de 2010, modificó parcialmente esta disposición en los siguientes términos:

ARTÍCULO 216. *TASAS POR UTILIZACIÓN DE AGUA.* Adiciónese los siguientes párrafos al artículo 43 de la Ley 99 de 1993.

**Parágrafo 1o.** Todo proyecto que requiera licencia ambiental y que involucre en su ejecución el uso del agua, tomada directamente de fuentes naturales, bien sea para consumo humano, recreación, riego o cualquier otra actividad, deberá destinar no menos del 1% del total de la inversión para la recuperación, preservación, conservación y vigilancia de la cuenca hidrográfica que alimenta la respectiva fuente hídrica. El beneficiario de la licencia ambiental deberá invertir estos recursos en las obras y acciones de recuperación, preservación y conservación de la respectiva cuenca hidrográfica, de acuerdo con la reglamentación vigente en la materia.

PARÁGRAFO 2o. Los recursos provenientes del recaudo de las tasas por utilización de agua, se destinarán de la siguiente manera:

a) En las cuencas con Plan de Ordenamiento y Manejo Adoptado, se destinarán exclusivamente a las actividades de protección, recuperación y monitoreo del recurso hídrico definidas en el mismo;

b) En las cuencas declaradas en ordenación, se destinarán a la elaboración del Plan de Ordenamiento y Manejo de la Cuenca;

c) En ausencia de las condiciones establecidas en los literales a) y b), se destinarán a actividades de protección y recuperación del recurso hídrico definidos en los instrumentos de planificación de la autoridad ambiental competente y teniendo en cuenta las directrices del Ministerio de Ambiente, Vivienda y Desarrollo Territorial, o quien haga sus veces. Para cubrir gastos de implementación, monitoreo y seguimiento; la autoridad ambiental podrá utilizar hasta el diez por ciento (10%) de los recaudos.

Los recursos provenientes de la aplicación del parágrafo 1o del artículo 43 de la Ley 99 de 1993, se destinarán a la protección y recuperación del recurso hídrico, de conformidad con el respectivo Plan de

Expediente No. 25000-23-27-000-2001-0479-01  
 Acumulados Nos. 2000-0428, 2001-0122, 2001-0343  
 Actor: GUSTAVO MOYA ÁNGEL Y OTROS  
 Acción Popular

Ordenamiento y Manejo de la Cuenca o en la formulación y adopción del Plan.

PARÁGRAFO 3o. La tasa por utilización de aguas se cobrará a todos los usuarios del recurso hídrico, excluyendo a los que utilizan el agua por ministerio de ley, pero incluyendo aquellos que no cuentan con la concesión de aguas, sin perjuicio de la imposición de las medidas preventivas y sancionatorias a que haya lugar y sin que implique bajo ninguna circunstancia su legalización.

Según se consigna en la Política de agua "las inversiones realizadas con los recaudos de la tasa por utilización de aguas, evidencia la participación de diferentes actividades dentro de las que, en orden de importancia, se encuentran: reforestación y restauración asociada a la conservación del recurso hídrico, el control de erosión, la adquisición y mantenimiento de predios para conservación del recurso hídrico y la formulación de planes de ordenación y manejo de cuencas hidrográficas, actividades éstas que concentran más del 90% del recaudo del instrumento económico (...)".

#### **I.4.4.14.1. Incentivos y excenciones tributarias**

Definidos en la Política como "(...)instrumentos tributarios que se constituyen en un estímulo a los productores que inviertan en tecnologías limpias y que busquen mejoramiento del desempeño ambiental de sus plantas. Tales instrumentos están enfocados a incentivar la inversión ambiental en áreas como la adopción de tecnologías limpias, la conservación de ecosistemas estratégicos y la innovación y desarrollo de nuevas tecnologías (...)".

El país cuenta con importantes incentivos tributarios a la inversión ambiental previstos entre otros instrumentos en el Estatuto Tributario.

#### **I.4.4.14.2. Sobretasa Ambiental**

La Ley 99 de 1993, reguló expresamente este ingreso de origen tributario en los siguientes términos:

Expediente No. 25000-23-27-000-2001-0479-01  
Acumulados Nos. 2000-0428, 2001-0122, 2001-0343  
Actor: GUSTAVO MOYA ÁNGEL Y OTROS  
Acción Popular

El artículo 44 de la Ley 99 de 1993, dispuso:

**Artículo 44°.-Porcentaje Ambiental de los Gravámenes a la Propiedad Inmueble.** Modificado el art. 110, Ley 1151 de 2007, Establécese, en desarrollo de lo dispuesto por el inciso 2o. del artículo 317 de la Constitución Nacional, y con destino a la protección del medio ambiente y los recursos naturales renovables, un porcentaje sobre el total del recaudo por concepto de impuesto predial, que no podrá ser inferior al 15% ni superior al 25.9%. El porcentaje de los aportes de cada municipio o distrito con cargo al recaudo del impuesto predial será fijado anualmente por el respectivo Concejo a iniciativa del alcalde municipal. Los municipios y distritos podrán optar en lugar de lo establecido en el inciso anterior por establecer, con destino al medio ambiente, una sobretasa que no podrá ser inferior al 1.5 por mil, ni superior al 2.5 por mil sobre el avalúo de los bienes que sirven de base para liquidar el impuesto predial.

Los municipios y distritos podrán conservar las sobretasas actualmente vigentes, siempre y cuando éstas no excedan el 25.9% de los recaudos por concepto de impuesto predial.

Dichos recursos se ejecutarán conforme a los planes ambientales regionales y municipales, de conformidad con las reglas establecidas por la presente Ley.

Los recursos que transferirán los municipios y distritos a las Corporaciones Autónomas Regionales por concepto de dichos porcentajes ambientales y en los términos de que trata el numeral 1o. del artículo 46, deberán ser pagados a éstas por trimestres, a medida que la entidad territorial efectúe el recaudo y, excepcionalmente, por anualidades antes del 30 de marzo de cada año subsiguiente al período de recaudación.

Las Corporaciones Autónomas Regionales destinarán los recursos de que trata el presente artículo a la ejecución de programas y proyectos de protección o restauración del medio ambiente y los recursos naturales renovables, de acuerdo con los planes de desarrollo de los municipios del área de su jurisdicción. Para la ejecución de las inversiones que afecten estos recursos se seguirán las reglas especiales sobre planificación ambiental que la presente ley establece.

**Parágrafo 1°.-** Los municipios y distritos que adeudaren a las Corporaciones Autónomas Regionales de su jurisdicción, participaciones destinadas a

Expediente No. 25000-23-27-000-2001-0479-01  
 Acumulados Nos. 2000-0428, 2001-0122, 2001-0343  
 Actor: GUSTAVO MOYA ÁNGEL Y OTROS  
 Acción Popular

protección ambiental con cargo al impuesto predial, que se hayan causado entre el 4 de julio de 1991 y la vigencia de la presente Ley, deberán liquidarlas y pagarlas en un término de 6 meses contados a partir de la vigencia de la presente Ley, según el monto de la sobretasa existente en el respectivo municipio o distrito al 4 de julio de 1991.

**Parágrafo 2º.** -Modificado por el art. 110 de la Ley 1151 de 2007. El 50% del producto correspondiente al recaudo del porcentaje o de la sobretasa del impuesto predial y de otros gravámenes sobre la propiedad inmueble, se destinará a la gestión ambiental dentro del perímetro urbano del municipio, distrito, o área metropolitana donde haya sido recaudado el impuesto, cuando la población municipal, distrital o metropolitana, dentro del área urbana, fuere superior a 1.000.000 habitantes. Estos recursos se destinarán exclusivamente a inversión.

El Plan Nacional de Desarrollo vigente, Ley 1450 de 2010, dispuso expresamente la destinación de este recurso a las inversiones para el Programa de Saneamiento del Río Bogotá:

ARTÍCULO 131. *INVERSIONES PROGRAMA DE SANEAMIENTO DEL RÍO BOGOTÁ.* Para el caso de la Corporación Autónoma Regional de Cundinamarca, el 50% de los recursos que, conforme a lo señalado por el artículo 44 de la Ley 99 de 1993, sean producto del recaudo del porcentaje o de la sobretasa ambiental al impuesto predial y de otros gravámenes sobre la propiedad inmueble de Bogotá, D. C, se destinarán para la financiación de los proyectos de adecuación hidráulica, ampliación de la Planta de Tratamiento de Aguas Residuales de Salitre y construcción de la Planta de Tratamiento de Aguas Residuales de Canoas, cualquiera sea el área de la cuenca media del río Bogotá en la cual se realicen las inversiones.

#### **1.4.4.14.3 Transferencias del sector eléctrico**

Tienen su fuente normativa en el artículo 45 de la Ley 99 de 1993, en los siguientes términos:

**Artículo 45º.** - Modificado por el art. 222, Ley 1450 de 2011. *Transferencia del Sector Eléctrico.* Las empresas generadoras de energía hidroeléctrica cuya potencia nominal instalada total supere los 10.000 kilovatios, transferirán el 6% de las ventas brutas de energía por generación propia, de acuerdo con la

Expediente No. 25000-23-27-000-2001-0479-01  
Acumulados Nos. 2000-0428, 2001-0122, 2001-0343  
Actor: GUSTAVO MOYA ÁNGEL Y OTROS  
Acción Popular

tarifa que para ventas en bloque señale la Comisión de Regulación Energética, de la manera siguiente:

1. El 3% para las Corporaciones Autónomas Regionales que tengan jurisdicción en el área donde se encuentra localizada la cuenca hidrográfica y el embalse, que será destinado a la protección del medio ambiente y a la defensa de la cuenca hidrográfica y del área de influencia del proyecto.
2. El 3% para los municipios y distritos localizados en la cuenca hidrográfica, distribuidos de la siguiente manera:
  - a. El 1.5% para los municipios y distritos de la cuenca hidrográfica que surte el embalse, distintos a los que trata el literal siguiente.
  - b. El 1.5% para los municipios y distritos donde se encuentra el embalse.

Cuando los municipios sean a la vez cuenca y embalse, participarán proporcionalmente en las transferencias de que hablan los literales a y b del numeral segundo del presente artículo.

Estos recursos sólo podrán ser utilizados por los municipios en obras previstas en el plan de desarrollo municipal, con prioridad para proyectos de saneamiento básico y mejoramiento ambiental.

3. En el caso de centrales térmicas la transferencia de que trata el presente artículo será del 4% que se distribuirá así:
  - a. Para la Corporación Autónoma Regional para la protección del medio ambiente del área donde está ubicada la planta.
  - b. Para el municipio donde está situada la planta generadora.

Estos recursos sólo podrán ser utilizados por el municipio en obras previstas en el plan de desarrollo municipal, con prioridad para proyectos de saneamiento básico y mejoramiento ambiental.

**Parágrafo 1º.-** De los recursos de que habla este artículo sólo se podrá destinar hasta el 10% para gastos de funcionamiento.

**Parágrafo 2º.-** Se entiende por saneamiento básico y mejoramiento ambiental la ejecución de obras de acueductos urbanos y rurales, alcantarillados, tratamientos de aguas y manejo y disposición de desechos líquidos y sólidos.

**Parágrafo 3º.-** En la transferencia a que hace relación este artículo, está comprendido el pago, por parte del

Expediente No. 25000-23-27-000-2001-0479-01  
 Acumulados Nos. 2000-0428, 2001-0122, 2001-0343  
 Actor: GUSTAVO MOYA ÁNGEL Y OTROS  
 Acción Popular

sector hidroenergético, de la tasa por utilización de aguas de que habla el artículo 43.

*I.6.3.5. CRÉDITO BANCA MULTILATERAL Y/O BANCA MUNDIAL  
 CON EL AVAL DEL GOBIERNO NACIONAL.*

Para el presente caso la CAR expidió el ACUERDO No. 019 **02 de noviembre de 2010**, Por medio del cual se autoriza al Director General de la Corporación Autónoma Regional de Cundinamarca - CAR para continuar y finalizar gestiones ante cualquier organismo de financiación multilateral para un empréstito internacional orientado a proyectos de Saneamiento en la Cuenca del Río Bogotá dentro de la jurisdicción de la Corporación, expedido por el Consejo Directivo de la CAR.

#### **I.4.4.15. DISTRIBUCIÓN DE LOS RECURSOS**

De otra parte, resulta importante una vez establecido el origen legal de las fuentes de los instrumentos económicos, su distribución:

##### *I.6.4.1. Provenientes de la Nación*

- *Del Sistema General de Participaciones*
- *Del Fondo Nacional de Regalías*
- *Del presupuesto nacional.*

##### **Del Sistema General de Participaciones**

- Ley 715 de 2001, Por la cual se dictan normas orgánicas en materia de recursos y competencias de conformidad con los artículos 151, 288, 356 y 357 (Acto Legislativo 01 de 2001) de la Constitución Política y se dictan otras disposiciones para organizar la prestación de los servicios de educación y salud, entre otros.
- Posteriormente el Acto Legislativo 04 de 2007, reformó las disposiciones contenidas en los artículos 356 y 357 de la Constitución Política, en los siguientes términos:

**Artículo 1º.** El inciso 4º del artículo 356 de la Constitución Política quedará así:

Expediente No. 25000-23-27-000-2001-0479-01  
Acumulados Nos. 2000-0428, 2001-0122, 2001-0343  
Actor: GUSTAVO MOYA ÁNGEL Y OTROS  
Acción Popular

Los recursos del Sistema General de Participaciones de los departamentos, distritos y municipios se destinarán a la financiación de los servicios a su cargo, dándoles prioridad al servicio de salud, los servicios de educación, preescolar, primaria, secundaria y media, y **servicios públicos domiciliarios de agua potable y saneamiento básico**, garantizando la prestación y la ampliación de coberturas con énfasis en la población pobre.

(...)

**Artículo 4º.** El artículo 357 de la Constitución Política quedará así:

El Sistema General de Participaciones de los Departamentos, Distritos y Municipios se incrementará anualmente en un porcentaje igual al promedio de la variación porcentual que hayan tenido los ingresos corrientes de la Nación durante los cuatro (4) años anteriores, incluido el correspondiente al aforo del presupuesto en ejecución.

Para efectos del cálculo de la variación de los ingresos corrientes de la Nación a que se refiere el inciso anterior, estarán excluidos los tributos que se arbitren por medidas de estado de excepción salvo que el Congreso, durante el año siguiente, les otorgue el carácter permanente.

El diecisiete por ciento (17%) de los recursos de Propósito General del Sistema General de Participaciones, será distribuido entre los municipios con población inferior a 25.000 habitantes. Estos recursos se destinarán exclusivamente para inversión, conforme a las competencias asignadas por la ley. Estos recursos se distribuirán con base en los mismos criterios de población y pobreza definidos por la ley para la Participación de Propósito General.

Los municipios clasificados en las categorías cuarta, quinta y sexta, de conformidad con las normas vigentes, podrán destinar libremente, para inversión y otros gastos inherentes al funcionamiento de la administración municipal, hasta un cuarenta y dos

Expediente No. 25000-23-27-000-2001-0479-01  
 Acumulados Nos. 2000-0428, 2001-0122, 2001-0343  
 Actor: GUSTAVO MOYA ÁNGEL Y OTROS  
 Acción Popular

(42%) de los recursos que perciban por concepto del Sistema General de Participaciones de Propósito General, exceptuando los recursos que se distribuyan de acuerdo con el inciso anterior.

Cuando una entidad territorial alcance coberturas universales y cumpla con los estándares de calidad establecidos por las autoridades competentes, en los sectores de educación, salud y/o servicios públicos domiciliarios de agua potable y saneamiento básico, previa certificación de la entidad nacional competente, podrá destinar los recursos excedentes a inversión en otros sectores de su competencia. El Gobierno Nacional reglamentará la materia.

- La Ley 1176 de 2007, Por la cual se desarrollan los artículos 356 y 357 de la Constitución Política y se dictan otras disposiciones dispuso: en los artículos 1º<sup>212</sup>, numerales 3 y 4 :

**i) Participación en los recursos del SGP, en los artículos 1º<sup>213</sup>, numerales 3 y 4:**

- Una participación con destinación específica para el sector de agua potable y saneamiento básico y,
- Una participación de propósito general.

**ii) Distribución sectorial de dichos recursos, en el artículo 2º numerales 3º y 4º<sup>214</sup>, así:**

---

<sup>212</sup>**Artículo 1º.** El artículo 3º de la Ley 715 de 2001, quedará así:

**"Artículo 3º.** *Conformación del Sistema General de Participaciones.* El Sistema General de Participación estará conformado así:

(...)

3. Una participación con **destinación específica para el sector agua potable y saneamiento básico**, que se denominará participación para agua potable y saneamiento básico.

4. **Una participación de propósito general".**

<sup>213</sup>**Artículo 1º.** El artículo 3º de la Ley 715 de 2001, quedará así:

**"Artículo 3º.** *Conformación del Sistema General de Participaciones.* El Sistema General de Participación estará conformado así:

(...)

3. Una participación con **destinación específica para el sector agua potable y saneamiento básico**, que se denominará participación para agua potable y saneamiento básico.

4. **Una participación de propósito general".**

<sup>214</sup>**Artículo 2º.** El artículo 4º de la Ley 715 de 2001, quedará así:

**"Artículo 4º.** *Distribución Sectorial de los Recursos.* El monto total del Sistema General de Participaciones, una vez descontados los recursos a que se refiere el parágrafo 2º del artículo 2º de la Ley 715 y los párrafos transitorios 2º y 3º del artículo 4º del Acto Legislativo 04 de 2007, se distribuirá entre las participaciones mencionadas en el artículo 3º de la Ley 715, así:

(...)

Expediente No. 25000-23-27-000-2001-0479-01  
 Acumulados Nos. 2000-0428, 2001-0122, 2001-0343  
 Actor: GUSTAVO MOYA ÁNGEL Y OTROS  
 Acción Popular

- Un 5.4% participación para agua potable y saneamiento básico y,
- Un 11.6% participación de propósito general.

**iii) Competencia de los departamentos, art. 3<sup>215</sup>, relacionada con la prestación de los servicios públicos de agua potable y saneamiento básico:**

Concurrir en su prestación a través de:

- La promoción, estructuración e implementación de esquemas regionales;
- Promoción, coordinación y/o cofinanciación para la operación de esquemas regionales.
- Asegurar a los municipios o distritos no certificados, los servicios públicos de agua potable y saneamiento básico en los términos previstos en la Ley 142 de 1994.
- Administrar los recursos del Sistema General de Participaciones con destinación al agua potable y saneamiento básico de los municipios o distritos no certificados con excepción del D.C.
- Reportar la información al SUI.

**iv) Distribución territorial de los recursos de agua potable y saneamiento básico, art. 6º<sup>216</sup>**

- 
3. Un 5.4% corresponderá a la participación para agua potable y saneamiento básico.  
 4. Un 11.6% corresponderá a la participación de propósito general".

<sup>215</sup>**Artículo 3º.** Competencias de los departamentos. Sin perjuicio de lo establecido en otras normas legales, corresponde a los departamentos ejercer las siguientes competencias relacionadas con la prestación de los servicios públicos de agua potable y saneamiento básico:

1. Concurrir a la prestación de los servicios públicos de agua potable y saneamiento básico mediante la promoción, estructuración implementación de esquemas regionales.
2. Promover, coordinar y/o cofinanciar la operación de esquemas regionales de prestación de los servicios públicos de agua potable y saneamiento básico.
3. Asegurar que se preste a los habitantes de los distritos o municipios no certificados en agua potable y saneamiento básico, de manera eficiente, los servicios públicos de agua potable y saneamiento básico, en los términos de la Ley 142 de 1994.

4. Administrar los recursos del Sistema General de Participaciones con destinación para Agua Potable y Saneamiento Básico de los distritos y municipios no certificados, con excepción del Distrito Capital de Bogotá.

**Parágrafo 1º.** Los departamentos deben reportar la información al Sistema Unico de Información de Servicios Públicos, SUI, o el que haga sus veces, con la oportunidad y calidad que determine la Superintendencia de Servicios Públicos Domiciliarios.(...)

<sup>216</sup>**Artículo 6º.** Distribución territorial de los recursos. Los recursos del Sistema General de Participaciones correspondientes a la participación

Expediente No. 25000-23-27-000-2001-0479-01  
 Acumulados Nos. 2000-0428, 2001-0122, 2001-0343  
 Actor: GUSTAVO MOYA ÁNGEL Y OTROS  
 Acción Popular

- 85% Distritos y municipios acorde con los criterios fijados art. 7 ibídem.
- 15% Departamentos y D.C., acorde criterios fijados art. 8
- Según lo dispuesto en el parágrafo los recursos recibidos por el D.C. por concepto de distribución se destinarán de forma EXCLUSIVA al Programa de Saneamiento del río Bogotá.

**v) Criterios de distribución se fijan en los artículos 7 y 8 de la Ley 1176/07.**

**vi) Destinación de los recursos de la participación:**

- Subsidios
- Pago de la deuda originada en la financiación de los proyectos del sector cuando se hayan pignorado los recursos asignados y demás operaciones financieras autorizadas por la ley.
- Pre-inversión en diseños, estudios, e interventorías para proyectos del sector de agua potable y saneamiento básico.
- Acciones para formular, implantar y fortalecer los esquemas organizacionales de administración y operación de los servicios de acueducto, alcantarillado y aseo en las zonas urbana y rural.
- Construcción, ampliación, optimización y mejoramiento de los sistemas de acueducto y alcantarillado e inversión en los servicios públicos de aseo.
- Programas de macro y micromedición
- Programas de reducción de agua no contabilizada.
- Adquisición de equipos requeridos para la operación de los sistemas de agua potable y saneamiento básico.
- Participar en la estructuración, implementación e inversión de la infraestructura de los esquemas regionales de prestación de los municipios.

En el parágrafo Primero dispone que las inversiones en proyectos del sector de los distritos y municipios deben estar definidos en los planes de desarrollo; en los Planes para la Gestión integral de los residuos sólidos PGIR-, en

---

para agua potable y saneamiento básico, se distribuirán de la siguiente manera:

1. 85% para distritos y municipios de acuerdo con los criterios de distribución establecidos en el artículo 7° de la presente ley.
2. 15% para los departamentos y el Distrito Capital, de acuerdo con los criterios de distribución establecidos en el artículo 8° de la presente ley.

**Parágrafo. Los recursos que por concepto de la distribución departamental que reciba el Distrito Capital se destinarán exclusivamente para el Programa de Saneamiento Ambiental del río Bogotá.**

Expediente No. 25000-23-27-000-2001-0479-01  
Acumulados Nos. 2000-0428, 2001-0122, 2001-0343  
Actor: GUSTAVO MOYA ÁNGEL Y OTROS  
Acción Popular

los Planes de inversión de las empresas prestadoras de los servicios públicos del respectivo Distrito o municipio.

En el parágrafo segundo, dispone que los municipios de las categorías 2, 3, 4, 5 y 6 deberán destinar mínimo el 15% de los recursos a los subsidios y cuando los municipios hayan logrado el correspondiente equilibrio entre subsidios y contribuciones podrán destinar un porcentaje menor de los recursos del SGP para el sector de agua potable y saneamiento básico conforme a la reglamentación que expida el Gobierno Nacional.

**vii) Constitución de Patrimonios Autónomos** por los departamentos, distritos o municipios con cargo a los recursos del SGP con destinación al sector de agua potable y saneamiento básico con el fin de garantizar los proyectos de inversión a mediano y largo plazo y asegurar la prestación eficiente de los recursos públicos de acueducto, alcantarillado y/o aseo en los eventos en que corresponda asegurar su prestación.

**viii) Giro de los recursos** El artículo 13 del mismo ordenamiento reglamentado por el Decreto 3320/08 dispone que el giro de los recursos de participación para agua potable y saneamiento básico deberán ser transferidos directamente a los departamentos, distritos y municipios sobre la base del 100% de la apropiación definida en la ley anual de presupuesto determinada en el PAC en el cual se establecerán los giros mensuales correspondientes por concepto de agua potable y saneamiento básico a los departamentos, distritos y municipios giro que deberá efectuarse dentro de los primeros diez (10) días del mes siguiente al que corresponde la transferencia.

**ix) Destinatario del giro** Los recursos del SGP se girarán directamente al prestador de los servicios de acueducto, alcantarillado o aseo o a los patrimonios autónomos o esquemas fiduciarios que se constituyan para el efecto siempre y cuando la entidad municipal así lo solicite y en los montos que ésta señale.

Expediente No. 25000-23-27-000-2001-0479-01  
Acumulados Nos. 2000-0428, 2001-0122, 2001-0343  
Actor: GUSTAVO MOYA ÁNGEL Y OTROS  
Acción Popular

- x) **Término para efectuar el giro** Las transferencias se girarán dentro de los diez (10) últimos días del mes al que corresponde la transferencia y las entidades territoriales pagarán dentro de los dos (2) días siguientes la transferencia a la Nación

De conformidad con estas disposiciones el Departamento Nacional de Planeación expidió el CONPES 112 de febrero 5 de 2008, DISTRIBUCIÓN DEL SISTEMA GENERAL DE PARTICIPACIONES, para precisar la metodología de distribución y ejecución de los recursos destinados al sector de agua potable y saneamiento básico en los siguientes términos:

### **3. PARTICIPACIÓN PARA AGUA POTABLE Y SANEAMIENTO BÁSICO**

El Acto Legislativo 04 de 2007 creó la participación para Agua Potable y Saneamiento Básico del Sistema General de Participaciones, lo cual permitió a través de la Ley 1176 de 2007 definir importantes modificaciones en la metodología de distribución y ejecución de los recursos destinados a este sector, garantizando así la ampliación de coberturas, el mejoramiento de la calidad y la adecuada prestación de los servicios de acueducto, alcantarillado y aseo, con énfasis en la atención de la población pobre. Antes de estas modificaciones legales los recursos de agua potable y saneamiento básico se incluían en la participación de Propósito General del Sistema General de Participaciones y por lo tanto se distribuían de acuerdo a los criterios de esta participación, sin tener en consideración las variables sectoriales. En adición a lo anterior, no se contaba con incentivos que promovieran la adecuada utilización de estos recursos, lo cual limitó su impacto en la ampliación de cobertura y calidad, a diferencia de lo observado en los sectores de Salud y Educación.

Los objetivos de la reglamentación de la participación de agua potable y saneamiento básico son: (i) garantizar coberturas universales en el menor tiempo posible al incluir las variables y criterios sectoriales en la distribución; (ii) lograr una ejecución más eficiente de los recursos mediante la definición de incentivos que premien a las entidades territoriales que aumenten coberturas y mejoren la calidad de los servicios; y, (iii) mejorar la articulación de los recursos de la participación de agua potable y saneamiento básico con la política sectorial.

Expediente No. 25000-23-27-000-2001-0479-01  
 Acumulados Nos. 2000-0428, 2001-0122, 2001-0343  
 Actor: GUSTAVO MOYA ÁNGEL Y OTROS  
 Acción Popular

Dentro de este contexto, se suscribió el Acuerdo de Cooperación para la construcción de la Planta de Tratamiento de aguas residuales de Canoas (Fase I y II) y su estación elevadora dentro del programa de saneamiento del río Bogotá el cual describe cada una de las fuentes de recursos para la financiación de la PTAR Canoas y su estación elevadora, y dispuso que por virtud del Sistema General de Participaciones -SGP Ley 1176 de 2007, artículo 6 numeral 2 y parágrafo<sup>217</sup>, se obtendrán los siguientes recursos:

- 1.- El 100% de la participación de Bogotá en la distribución del SGP sectorial para departamentos, período 2011-2040.
- 2.- Los recursos provenientes del Sistema General de Participaciones de la participación de Bogotá D.C., como municipio entre los años 2011 y 2040.

#### **Del Fondo Nacional de Regalías**

- Ley 141 de 1994, Por la cual se crean el Fondo Nacional de Regalías, la Comisión Nacional de Regalías, se regula el derecho del Estado a percibir regalías por la explotación de recursos naturales no renovables, se establecen las reglas para su liquidación y distribución y se dictan otras disposiciones, modificada por las Leyes 756 de 2002 y 858 de 2003.

Artículo 1, numeral 3° del parágrafo 5°.

PARÁGRAFO 5o. <Parágrafo modificado por el artículo 7 de la Ley 756 de 2002. El nuevo texto es el siguiente:> Las dos terceras partes (2/3) de los recursos asignados a la preservación del medio ambiente tendrán la siguiente destinación:

(...)

3. No menos del veintiuno por ciento (21%) para financiar programas y proyectos para la descontaminación del Río Bogotá.

- **Ley 1151 de 2007, recursos provenientes del SECTOR DE AGUA POTABLE Y SANEAMIENTO BÁSICO.**

---

<sup>217</sup>2. 15% para los departamentos y el Distrito Capital, de acuerdo con los criterios de distribución establecidos en el artículo 8° de la presente ley.

Parágrafo. Los recursos que por concepto de la distribución departamental que reciba el Distrito Capital se destinarán exclusivamente para el Programa de Saneamiento Ambiental del río Bogotá.

Expediente No. 25000-23-27-000-2001-0479-01  
Acumulados Nos. 2000-0428, 2001-0122, 2001-0343  
Actor: GUSTAVO MOYA ÁNGEL Y OTROS  
Acción Popular

ARTÍCULO 91. PLANES DEPARTAMENTALES PARA EL MANEJO EMPRESARIAL DE LOS SERVICIOS DE AGUA Y SANEAMIENTO. Los recursos que aporte el Gobierno Nacional a la ejecución de los planes departamentales para el manejo empresarial de los servicios de agua y saneamiento estarán condicionados al compromiso por parte de las entidades territoriales, de los recursos del Sistema General de Participaciones y de regalías, así como de los compromisos de transformación empresarial que se deriven del diagnóstico institucional respectivo.

El Gobierno Nacional señalará la metodología para definir el nivel de compromisos a que se refiere el inciso anterior.

Los recursos de apoyo de la Nación al sector y los que aporten las Corporaciones Autónomas Regionales, se ejecutarán en el marco de los planes a que se refiere el presente artículo.

PARÁGRAFO. Las empresas de servicios públicos domiciliarios podrán ejecutar los proyectos del sector de agua potable y saneamiento básico en cumplimiento y/o desarrollo de los planes de que trata el presente artículo, indistintamente de las fuentes de financiación de los mismos.

ARTÍCULO 92. *DE LAS INVERSIONES DE LAS CORPORACIONES AUTÓNOMAS REGIONALES EN EL SECTOR DE AGUA POTABLE Y SANEAMIENTO BÁSICO.* Las obras de infraestructura del sector de agua potable y saneamiento básico, financiadas con recursos de las Corporaciones Autónomas Regionales podrán ser entregadas como aportes a municipios a Empresas de Servicios Públicos bajo la condición de que trata el numeral 87.9 del artículo 87 de la Ley 142 de 1994 o las normas que las modifiquen o sustituyan. En ningún caso se configurará detrimento patrimonial o situación similar cuando la Corporación Autónoma Regional, realice este tipo de aportes.

PARÁGRAFO. A partir de la entrada en vigencia de la presente ley, las Corporaciones Autónomas Regionales no podrán tener participación en la composición accionaria, propiedad, administración y operación de un prestador de servicios públicos domiciliarios, con excepción de inversiones que hayan realizado las CAR con anterioridad a la expedición de esta ley.

ARTÍCULO 106. El artículo 111 de la Ley 99 de 1993 quedará así:

"Artículo 111. *Adquisición de áreas de interés para acueductos municipales.* Declárense de interés público las áreas de importancia estratégica para la

Expediente No. 25000-23-27-000-2001-0479-01  
 Acumulados Nos. 2000-0428, 2001-0122, 2001-0343  
 Actor: GUSTAVO MOYA ÁNGEL Y OTROS  
 Acción Popular

conservación de recursos hídricos que surten de agua los acueductos municipales y distritales.

**Los departamentos y municipios dedicarán un porcentaje no inferior al 1% de sus ingresos corrientes para la adquisición y mantenimiento de dichas zonas o para financiar esquemas de pago por servicios ambientales.**

Los recursos de que trata el presente artículo, se destinarán prioritariamente a la adquisición y mantenimiento de las zonas.

La administración de estas zonas corresponderá al respectivo distrito o municipio, en forma conjunta con la respectiva Corporación Autónoma Regional y con la participación opcional de la sociedad civil y de la Unidad Administrativa Especial del Sistema de Parques Nacionales Naturales, cuando corresponda.

PARÁGRAFO. Los proyectos de construcción de distritos de riego deberán dedicar un porcentaje no inferior al 1% del valor de la obra a la adquisición de áreas estratégicas para la conservación de los recursos hídricos que los surten de agua. Para los distritos de riego que requieren licencia ambiental, aplicará lo contenido en el parágrafo del artículo 43 de la Ley 99 de 1993.

ARTÍCULO 110. El parágrafo 2o del artículo 44 de la Ley 99 de 1993, modificado por el artículo 79 de la Ley 1110 de 2006, quedará así:

"Parágrafo 2o. El cincuenta por ciento (50%) del producto correspondiente al recaudo del porcentaje o de la sobretasa del impuesto predial y de otros gravámenes sobre la propiedad inmueble, se destinará a la gestión ambiental dentro del perímetro urbano del municipio, distrito, o área metropolitana donde haya sido recaudado el impuesto, cuando la población respectiva, dentro del área urbana, fuere superior a un millón de habitantes, exceptuando el megaproyecto del río Bogotá. Estos recursos se destinarán exclusivamente a inversión".

**- Del Acto Legislativo 5 de 2011**

ARTÍCULO 2o. El artículo 361 de la Constitución Política quedará así:

Artículo 361. Los ingresos del Sistema General de Regalías se destinarán al financiamiento de proyectos para el desarrollo social, económico y ambiental de las entidades territoriales; (...)

Los departamentos, municipios y distritos en cuyo territorio se adelanten explotaciones de recursos naturales no renovables, así como los municipios y distritos con puertos marítimos y fluviales por donde

Expediente No. 25000-23-27-000-2001-0479-01  
 Acumulados Nos. 2000-0428, 2001-0122, 2001-0343  
 Actor: GUSTAVO MOYA ÁNGEL Y OTROS  
 Acción Popular

se transporten dichos recursos o productos derivados de los mismos, tendrán derecho a participar en las regalías y compensaciones, así como a ejecutar directamente estos recursos.

Para efectos de cumplir con los objetivos y fines del Sistema General de Regalías, créanse los Fondos de Ciencia, Tecnología e Innovación; de Desarrollo Regional; de Compensación Regional; y de Ahorro y Estabilización.

**Los ingresos del Sistema General de Regalías se distribuirán así:** un porcentaje equivalente al 10% para el Fondo de Ciencia, Tecnología e Innovación; un 10% para ahorro pensional territorial, y hasta un 30% para el Fondo de Ahorro y Estabilización. Los recursos restantes se distribuirán en un porcentaje equivalente al 20% para las asignaciones directas de que trata el inciso 2o del presente artículo, y un 80% para los Fondos de Compensación Regional, y de Desarrollo Regional. Del total de los recursos destinados a estos dos últimos Fondos, se destinará un porcentaje equivalente al 60% para el Fondo de Compensación Regional y un 40% para el Fondo de Desarrollo Regional.

**Los recursos del Fondo de Compensación Regional se destinarán a la financiación de proyectos de impacto regional o local de desarrollo en las entidades territoriales más pobres del país, de acuerdo con criterios de Necesidades Básicas Insatisfechas (NBI), población y desempleo, y con prioridad en las zonas costeras, fronterizas y de periferia.** La duración del Fondo de Compensación Regional será de treinta (30) años, contados a partir de la entrada en vigencia de la ley a la que se refiere el inciso 2o del artículo anterior. Transcurrido este período, estos recursos se destinarán al Fondo de Desarrollo Regional.

(...)

- Ley 1530 de 2012 "Por la cual se regula la organización y el funcionamiento del sistema general de regalías".

Esta Ley regula el Sistema General de Regalías y en los artículos 39 y siguientes establece la distribución de los recursos por este concepto, su cuantía, destinación, forma de ejecución y seguimiento de los recursos asignados, así:

**Artículo 39. Destinatarios de asignaciones directas.** Las entidades territoriales de que trata el inciso segundo del artículo 361 de la Constitución Política recibirán asignaciones directas en virtud del derecho

Expediente No. 25000-23-27-000-2001-0479-01  
Acumulados Nos. 2000-0428, 2001-0122, 2001-0343  
Actor: GUSTAVO MOYA ÁNGEL Y OTROS  
Acción Popular

a participar en las regalías y compensaciones previsto en dicha norma, sin perjuicio de su derecho a participar de los recursos de los fondos del sistema. Las Corporaciones Autónomas Regionales recibirán las compensaciones en los términos establecidos en los artículos 40, 41, 46, 47 y 48 de La Ley 141 de 1994.

Artículo 40. *Destinación de los recursos de las asignaciones directas.* Los recursos de las asignaciones directas de que tratan el inciso segundo del artículo 361 de la Constitución Política y el artículo 21 de la presente ley, se **destinarán a la financiación o cofinanciación de proyectos de inversión para el desarrollo social, económico y ambiental de las entidades territoriales.**

Para la destinación de estos recursos, las entidades beneficiarias se sujetarán a su régimen de competencias vigente, y aplicarán los principios de coordinación, concurrencia y subsidiariedad con el fin de evitar la duplicidad de inversiones entre los niveles de gobierno.

(...)

Artículo 41. *Proyectos de Inversión.* Las entidades beneficiarias de los proyectos de inversión a las que se refiere el presente capítulo, realizarán la evaluación previa y registro de los mismos, en concordancia con lo previsto en la presente ley, en particular el capítulo I del Título IV.

Para efectos de ejecutar los proyectos que se pretendan financiar con recursos de las asignaciones directas deberán ser concordantes con el plan de desarrollo territorial, y ser formulados conforme a las metodologías y lineamientos que defina el Departamento Nacional de Planeación, en su condición de organismo nacional de planeación y en desarrollo de lo dispuesto por el numeral 3 del artículo 49 de la Ley 152 de 1994.

(...)

Artículo 43. *Ejecución de los proyectos de inversión.* Los proyectos de inversión que se financien con las asignaciones directas, serán ejecutados con estricta sujeción al régimen de contratación vigente y aplicable a la respectiva entidad.

Artículo 44. *Imputación o clasificación presupuestal de los recursos.* Los ingresos percibidos por asignaciones directas, por ser de destinación específica, no forman parte de los ingresos

Expediente No. 25000-23-27-000-2001-0479-01  
 Acumulados Nos. 2000-0428, 2001-0122, 2001-0343  
 Actor: GUSTAVO MOYA ÁNGEL Y OTROS  
 Acción Popular

corrientes de libre destinación de las entidades beneficiarias y, por consiguiente, no harán unidad de caja con los demás recursos del presupuesto. **Se manejarán en una cuenta única separada que genere rendimientos, autorizada por el Sistema de Monitoreo, Seguimiento, Control y Evaluación de las regalías.**

***Provenientes del Distrito Capital***

- **Del Sistema General de Participaciones**, en los términos descritos en la normativa transcrita para su distribución y destinación, dentro del Sistema General de Participaciones:

1.- El 100% de la participación de Bogotá en la distribución del SGP sectorial para departamentos, período 2011-2040.

2.- Los recursos provenientes del Sistema General de Participaciones de la participación de Bogotá D.C., como municipio entre los años 2011 y 2040.

- **De las transferencias del sector eléctrico**  
 Para el efecto se cuenta con los recursos establecidos por el artículo 45 de la Ley 99 de 1993 y en el porcentaje allí establecido.

Esta disposición es del siguiente tenor:

**Artículo 45°.-** Modificado por el art. 222, Ley 1450 de 2011. Transferencia del Sector Eléctrico. Las empresas generadoras de energía hidroeléctrica cuya potencia nominal instalada total supere los 10.000 kilovatios, **transferirán el 6% de las ventas brutas de energía por generación propia**, de acuerdo con la tarifa que para ventas en bloque señale la Comisión de Regulación Energética, de la manera siguiente:.

1. El 3% para las Corporaciones Autónomas Regionales que tengan jurisdicción en el área donde se encuentra localizada la cuenca hidrográfica y el embalse, que será destinado a la protección del medio ambiente y a la defensa de la cuenca hidrográfica y del área de influencia del proyecto.
2. El 3% para los municipios y distritos localizados en la cuenca hidrográfica, distribuidos de la siguiente manera:

Expediente No. 25000-23-27-000-2001-0479-01  
 Acumulados Nos. 2000-0428, 2001-0122, 2001-0343  
 Actor: GUSTAVO MOYA ÁNGEL Y OTROS  
 Acción Popular

- a. El 1.5% para los municipios y distritos de la cuenca hidrográfica que surte el embalse, distintos a los que trata el literal siguiente.
- b. El 1.5% para los municipios y distritos donde se encuentra el embalse.

Cuando los municipios sean a la vez cuenca y embalse, participarán proporcionalmente en las transferencias de que hablan los literales a y b del numeral segundo del presente artículo.

Estos recursos sólo podrán ser utilizados por los municipios en obras previstas en el plan de desarrollo municipal, con prioridad para proyectos de saneamiento básico y mejoramiento ambiental.

1. En el caso de centrales térmicas la transferencia de que trata el presente artículo será del 4% que se distribuirá así:
  - a. Para la Corporación Autónoma Regional para la protección del medio ambiente del área donde está ubicada la planta.
  - b. Para el municipio donde está situada la planta generadora.

Estos recursos sólo podrán ser utilizados por el municipio en obras previstas en el plan de desarrollo municipal, con prioridad para proyectos de saneamiento básico y mejoramiento ambiental.

**Parágrafo 1º.-** De los recursos de que habla este artículo sólo se podrá destinar hasta el 10% para gastos de funcionamiento.

**Parágrafo 2º.-** Se entiende por saneamiento básico y mejoramiento ambiental la ejecución de obras de acueductos urbanos y rurales, alcantarillados, tratamientos de aguas y manejo y disposición de desechos líquidos y sólidos.

**Parágrafo 3º.-** En la transferencia a que hace relación este artículo, está comprendido el pago, por parte del sector hidroenergético, de la tasa por utilización de aguas de que habla el artículo 43.

- Del Fondo Cuenta del Río Bogotá.
- De los aportes de la Empresa de Acueducto y Alcantarillado de Bogotá y recursos propios.
- De las tarifas

*I.6.4.3. Provenientes de la Corporación Autónoma Regional - CAR.*

Expediente No. 25000-23-27-000-2001-0479-01  
Acumulados Nos. 2000-0428, 2001-0122, 2001-0343  
Actor: GUSTAVO MOYA ÁNGEL Y OTROS  
Acción Popular

- Recaudo Impuesto Predial de Bogotá y sus rendimientos financieros.

*I.6.4.4. Provenientes de la Gobernación de Cundinamarca*

- *Del Plan Departamental de Aguas -PDA, incluye los recursos del SGP municipio de Soacha*
- *Del Plan Departamental de Aguas -PDA, incluye los recursos del SGP municipio de Soacha*

***Provenientes del crédito externo Banca Multilateral***

Expediente No. 25000-23-27-000-2001-0479-01  
 Acumulados Nos. 2000-0428, 2001-0122, 2001-0343  
 Actor: GUSTAVO MOYA ÁNGEL Y OTROS  
 Acción Popular

#### **I.4.4.16. CONCLUSIONES ANALISIS FINANCIERO**

Para realizar las inversiones requeridas para recuperar la cuenca del río Bogotá y sus afluentes, se debe contar con las siguientes fuentes de financiación:

**Para el programa de saneamiento de río Bogotá; procedencia y responsable del giro**

#### **DEL PRESUPUESTO GENERAL DE LA NACION**

- La Nación deberá contribuir con recursos del presupuesto general de la Nación con el 100% del cupo indicativo asignado a Bogotá D.C., Decreto 3170 de 2008 que equivale a \$39.370 millones (de pesos 2010), para la financiación de la primera fase de la PTAR CANOAS y su Estación Elevadora.

#### **Responsable: La Nación**

- De conformidad con la Ley 141 de 1994, previo cumplimiento de los requisitos de ley y una vez se presenten los respectivos proyectos, deberán asignarse los recursos previstos en el numeral 3 parágrafo 5, art. 1, así como los provenientes de la desacumulación del Stock del FNR: \$53.653 millones para la vigencia 2011, debidamente actualizados, previa aprobación del Consejo Nacional de Regalías.

#### **Responsable: La Nación**

- El Gobierno Nacional establecerá los mecanismos expeditos para que se de aplicación al incentivo tributario previsto en el artículo 424-5 (numeral 4) y 428 literal f) del Estatuto Tributario.

#### **Responsable: Gobierno Nacional.**

#### **DEL SISTEMA GENERAL DE PARTICIPACIONES**

- De conformidad con el Plan de Desarrollo contenido en la Ley 1151 de 2007, se deben destinar con carácter

Expediente No. 25000-23-27-000-2001-0479-01  
Acumulados Nos. 2000-0428, 2001-0122, 2001-0343  
Actor: GUSTAVO MOYA ÁNGEL Y OTROS  
Acción Popular

exclusivo los recursos provenientes del Sistema General de Participaciones para la descontaminación del Río Bogotá, por concepto de la distribución departamental al Distrito Capital (parágrafo del artículo 6 de la Ley 1176 de 2007).

- Los recursos provenientes de la participación de Bogotá en la distribución del Sistema General de Participaciones sectorial como municipio, siempre y cuando exista saldo positivo entre los recursos asignados y el valor del déficit entre subsidios y aportes solidarios. (Ley 1176/07, art.11)

**DE LA CORPORACION AUTONOMA REGIONAL-CAR.**

- Los recursos provenientes del predial en los términos previstos en el parágrafo 2° del artículo 44 de la Ley 99 de 1993 recaudados por la CAR correspondientes al 50% del 7.5% del impuesto predial, previa deducción de los costos de la Planta de Tratamiento de Aguas Residuales - PTAR- Salitre, en su ampliación.

**Destinación:** se destinarán para la financiación de los proyectos de adecuación hidráulica, ampliación de la Planta de Tratamiento de Aguas Residuales de Salitre y construcción de la Planta de Tratamiento de Aguas Residuales de Canoas, cualquiera sea el área de la cuenca media del río Bogotá en la cual se realicen las inversiones. (art. 131 Ley 1450/11).

**Oportunidad de giro:** deberán ser pagados a la CAR por trimestres, a medida que la entidad territorial efectúe el recaudo y, excepcionalmente, por anualidades antes del 30 de marzo de cada año subsiguiente al período de recaudación.(art. 44 Ley 99/93).

**Responsable:** Los municipios y distritos encargados de efectuar el recaudo (artículo 44 de la Ley 99/93).

**Cuantía:** El porcentaje de los aportes de cada municipio o distrito con cargo al recaudo del impuesto predial será

Expediente No. 25000-23-27-000-2001-0479-01  
 Acumulados Nos. 2000-0428, 2001-0122, 2001-0343  
 Actor: GUSTAVO MOYA ÁNGEL Y OTROS  
 Acción Popular

fijado anualmente por el respectivo Concejo a iniciativa del alcalde municipal.

#### **DEL DEPARTAMENTO DE CUNDINAMARCA**

- De acuerdo con el Plan departamental de agua y saneamiento de Cundinamarca, se incluirán los recursos provenientes del Sistema General de Participaciones del municipio de Soacha.

#### **DEL DISTRITO CAPITAL**

- Los recursos correspondientes al 100% de las transferencias del sector eléctrico a Bogotá D.C., por virtud de la Ley 99 de 1993 artículo 45.
- Los recursos del Fondo Cuenta y sus rendimientos financieros administrados por la Secretaria de Hacienda Distrital.

#### **DE LA EMPRESA DE ACUEDUCTO Y ALCANTARILLADO DE BOGOTA**

- Los recursos provenientes de las tasas retributivas cuyo concepto está incluido en las tarifas por la empresa prestadora del servicio para esta destinación específica, artículo 66 de la Ley 99 de 1993, por concepto del 50% de tasas retributivas o compensatorias.
- Los recursos propios destinados para el efecto.

**Fuente:** Cofinanciación convenio 9-07-25500-0869-2011 MVCT y Acuerdo 071/11 DNP.

#### **DE EMGESA**

- Los recursos comprometidos en el Acuerdo de diciembre de 2011, sin que sea susceptible de condicionamiento alguno.

**Fuente:** Convenio EAAB No. 9-07-10200-0688-2011

#### **DE LA BANCA MULTILATERAL**

De conformidad con los acuerdos aprobados para el efecto previas autorizaciones.

#### **DE LOS INCENTIVOS**

No hay duda que el uso eficiente del agua se encuentra estrechamente relacionado con la aplicación efectiva de los principios que además se complementan entre sí, por una parte

Expediente No. 25000-23-27-000-2001-0479-01  
Acumulados Nos. 2000-0428, 2001-0122, 2001-0343  
Actor: GUSTAVO MOYA ÁNGEL Y OTROS  
Acción Popular

el agua financia el agua y de manera complementaria el que usa el agua y contamina paga.

En desarrollo de estos principios se tienen el pago de los servicios públicos domiciliarios y la Comisión Reguladora de Agua Potable y Saneamiento Básico, Ley 142 de 1994, que prevé la inclusión de un sistema para definir las tarifas a los usuarios e incorpora los costos de inversión a largo plazo, así como de administración y funcionamiento del sistema en las tarifas del servicio. Ello genera un incentivo económico para el uso racional del recurso.

Frente al uso directo del recurso como es el caso de los distritos de riego, generación de energía eléctrica, minería e hidrocarburos, o para usos de navegación fluvial, al no existir sistema tarifario resulta más complejo definir los costos de oportunidad.

Así como los implícitos derivados de su uso ineficiente evento en el cual se aplican otros instrumentos derivados del principio del que contamina paga, relacionadas con el uso de los cuerpos de agua, instrumentos cuyo análisis se efectuó en el acápite anterior: tasas por el uso del agua, tasas retributivas por el uso de los cuerpos receptores y las tasas compensatorias para garantizar la revocabilidad del recurso.

Finalmente, el Gobierno Nacional deberá expedir los reglamentos necesarios acorde con los incentivos establecidos en el Estatuto Tributario referidos.

#### **Destinación de los recursos provenientes de las tarifas**

- Los costos de operación y mantenimiento de las plantas de tratamiento se incorporarán en las tarifas de servicios públicos domiciliarios de alcantarillado de conformidad con las normas legales y reglamentarias, con excepción de los costos de operación y mantenimiento de

Expediente No. 25000-23-27-000-2001-0479-01  
Acumulados Nos. 2000-0428, 2001-0122, 2001-0343  
Actor: GUSTAVO MOYA ÁNGEL Y OTROS  
Acción Popular

la estación elevadora y los costos de energía de la PTAR Canoas que serán asumidos por EMGESA, una vez se defina la ampliación de la concesión de agua del río Bogotá para la generación de energía.

#### **Otras fuentes de financiación**

- La Nación, el Distrito Capital, la EAAB ESP y la Gobernación de Cundinamarca, deberán analizar otras fuentes de recursos adicionales para acelerar en el tiempo las inversiones para el tratamiento secundario en la Planta de Tratamiento.

##### **1.4.4.17. ORDENES A IMPARTIR**

- El Ministerio de Ambiente y Desarrollo Sostenible deberá revisar con la periodicidad de ley el cálculo de las tasas retributivas.
- El Gobierno Nacional no sólo deberá contribuir con la financiación del Proyecto de Saneamiento del Río Bogotá mediante aportes no reembolsables, sino además acorde con el ordenamiento jurídico, en particular el Plan Nacional de Desarrollo 2010-2014, establecer una autoridad de cuenca que articule, coordine, vigile y monitoree los recursos, la ejecución de las obras y su operación y mantenimiento.
- La autoridad de cuenca deberá estructurar un plan de acciones con carácter integral y coordinado sobre toda la cuenca que conduzca al mejoramiento ambiental del Río Bogotá, sus afluentes y la zona de ronda.
- Hacia el futuro se requerirá estructurar planes de financiación que resulten coherentes con la solución integral para el saneamiento del río Bogotá y sus afluentes, así como del área de influencia respecto de los temas específicos, como lo son: disposición de residuos sólidos, reforestación, áreas protegidas, curtiembres, producción más limpia, programas educativos

Expediente No. 25000-23-27-000-2001-0479-01  
Acumulados Nos. 2000-0428, 2001-0122, 2001-0343  
Actor: GUSTAVO MOYA ÁNGEL Y OTROS  
Acción Popular

de reciclaje en la fuente y mecanismos para disminuir el riesgo ambiental.

- Para desarrollar la estrategia de solución integral para la Cuenca del río Bogotá, se requiere contar con el compromiso no sólo de las autoridades ambientales sino del gobierno central, las autoridades locales, el sector privado, el sector productivo estatal, las organizaciones no gubernamentales, las comunidades de base y la sociedad civil.
- La estrategia de financiación de la inversión ambiental, debe enmarcarse dentro de los principios de eficiencia y eficacia, internalización de costos ambientales, racionalidad, prevención e integralidad y complementariedad, acorde con la gestión integral establecida para el saneamiento del río Bogotá.
- Resulta indispensable concertar el desarrollo sostenible y sus impactos financieros a mediano y largo plazo con las políticas de estado.
- Comprometer los recursos a vigencias futuras y administrar los recursos y continuar la administración de estos en el fondo cuenta constituido mediante el acuerdo 31 de 2001 del Concejo de Bogotá, adscrito a la Secretaria de Hacienda del Distrito Capital.
- Adoptar un esquema financiero independiente de la Empresa de Acueducto y Alcantarillado de Bogotá, que permita canalizar los recursos asignados al saneamiento del río Bogotá y reconocer a la entidad distrital ser sujeto de crédito para cubrir el déficit con el aval de la Nación, así como agotar los recursos jurídicos y de concertación para poder realizar la inversión en la planta de tratamiento de aguas residuales para Bogotá y Soacha y así poder garantizar la viabilidad financiera de la operación.
- En el evento que los recursos de los municipios de la Cuenca alta, media y baja del río Bogotá resulten insuficientes para las inversiones para el saneamiento

Expediente No. 25000-23-27-000-2001-0479-01  
 Acumulados Nos. 2000-0428, 2001-0122, 2001-0343  
 Actor: GUSTAVO MOYA ÁNGEL Y OTROS  
 Acción Popular

tales como: actualización de las Plantas de Tratamiento, adecuación de los sistemas de acueducto y alcantarillado y disposición de residuos sólidos, se deben buscar recursos a través del crédito interno y externo.

- El Gobierno Nacional deberá establecer los mecanismos expeditos para que se de aplicación al incentivo tributario previsto en el artículo 424-5 (numeral 4) y 428 literal f) del Estatuto Tributario.

2.- Programa de Saneamiento: Acueducto y Alcantarillado de los municipios de la Cuenca distintos al Distrito Capital.

- Recursos propios
- Asignación recursos transferencias sector eléctrico
- Asignación recursos sistema general de participaciones
- Asignación recursos provenientes del Sistema General de Regalías.
- De conformidad el presupuesto y los planes maestros de Acueducto y alcantarillado los municipios deben el componente ambiental, así como el Plan de Gestión Integral de residuos sólidos -PGIR en el POT.
- El Gobierno Nacional y el Ministerio de Ambiente, Vivienda y Desarrollo Territorial deberán revisar el Decreto 155 de 22 de enero de 2004, que reglamenta el artículo 43 de la Ley 99 de 1993, sobre tasas por utilización de aguas, en cuanto las tarifas mínimas y máximas allí establecidas resultan irrisorias por el uso del recurso y por lo tanto no constituyen un incentivo para el ahorro del agua para los sectores agrícola e industrial.

Término máximo de seis (6) meses.

- Las tasas retributivas por concepto de vertimientos a los cuerpos de agua, previstas en el artículo 42 de la Ley 99 de 1993, que deben cobrarse a todos aquellos que realicen vertimientos de desechos por cualquier actividad de origen antrópico, como se dispuso en el artículo 211 de la Ley 1450 de 2011, esto es, "*se aplicarán incluso a la contaminación causada por encima de los límites permisibles sin perjuicio de la imposición de las medidas preventivas y sancionatorias a que haya lugar*". Y con la advertencia clara de que el cobro de esta tasa "*no implica bajo ninguna*

Expediente No. 25000-23-27-000-2001-0479-01  
Acumulados Nos. 2000-0428, 2001-0122, 2001-0343  
Actor: GUSTAVO MOYA ÁNGEL Y OTROS  
Acción Popular

*circunstancia la legalización del respectivo vertimiento". Su aplicación tendrá que generar reducciones altas en el porcentaje de vertimientos los cuales serán verificados por la gerencia de cuenca, según los reportes y evaluaciones periódicas.*

- La CAR deberá recibir los recaudos transferidos por la Secretaría Distrital de Ambiente (art. 66 Ley 99 de 1993) y a su vez al Fondo Cuenta para su administración, cobertura y seguimiento.
- El Gobierno Nacional deberá reglamentar las tasas compensatorias para garantizar los planes de acción para la conservación de la cuenca del río Bogotá, especialmente en aspectos relacionados con el manejo del suelo y de los bosques riparios, las cuales hasta ahora no han sido reglamentadas.

Plazo: 6 meses

- La CAR deberá de manera prioritaria invertir en saneamiento ambiental los recursos provenientes de las transferencias del sector eléctrico, particularmente en los municipios de la cuenca y conservación de la cuenca abastecedora.
- El porcentaje del 1% previsto en el artículo 111 de la Ley 99 de 1993, proveniente de los ingresos corrientes de los entes territoriales deberá destinarse exclusivamente para adquirir y mantener las zonas de importancia estratégica que surten de agua a los acueductos municipales, distritales y regionales, por cuanto también ha sido aplicada con baja cobertura y poco seguimiento por parte de las autoridades ambientales regionales y nacionales, a pesar de sus modificaciones introducidas por la Ley 1151 de 2007 y la Ley 1450 de 2011 y el Decreto 953 de mayo 17 de 2013.
- Los municipios acorde con el Decreto 953 de 2013, deberán incluir de manera desagregada en sus respectivos Planes de Desarrollo, los planes de inversión de estos recursos con destinación específica.
- La totalidad de los recursos percibidos del Sistema General de Participaciones asignados a los municipios, al Distrito Capital y al Departamento de Cundinamarca más el 10% de los recursos de libre inversión deberán ser destinados para agua potable y saneamiento básico.
- Cada uno de los municipios de la cuenca, el distrito capital y el Departamento deberán asignar el 25% que reciben por concepto de regalías directas, fondo de

Expediente No. 25000-23-27-000-2001-0479-01  
Acumulados Nos. 2000-0428, 2001-0122, 2001-0343  
Actor: GUSTAVO MOYA ÁNGEL Y OTROS  
Acción Popular

compensación, fondo de desarrollo regional y asignaciones para ciencia y tecnología.

- Para hacer realmente efectiva esta gestión integral las asignaciones deberán realizarse orientadas a redistribuir los recursos desde los entes territoriales, esto es, desde el Distrito capital hacia los municipios con menor capacidad financiera, como lo son los municipios de las cuencas alta y baja, acorde con el concepto de pago por servicios ambientales (art. 111, Ley 99 de 1993) y sin desconocer las limitaciones de orden legal que establecen destinación específica de algunos recursos.

*I.5. Referente normativo y funcional para las autoridades de la Cuenca.*

El artículo 79 de la Constitución establece que todas las personas tienen derecho a gozar de un ambiente sano y que es deber del Estado proteger la diversidad e integridad del ambiente; el artículo 49 prevé que la atención de la salud y el saneamiento son servicios públicos a cargo del Estado; y conforme al artículo 80, le corresponde prevenir y controlar los factores de deterioro ambiental, imponer las sanciones legales y exigir la reparación de los daños causados. Por su parte, a los Concejos Municipales les compete, según los numerales 1,7 y 9 del artículo 313 de la Constitución Política, dictar las disposiciones necesarias para la eficiente prestación de los servicios a cargo del municipio, reglamentar los usos del suelo dentro de los límites que fije la ley y dictar las normas necesarias para el control y la preservación del patrimonio ecológico de la localidad, mientras que a los alcaldes le corresponde por mandato constitucional (art. 315) hacer cumplir la Constitución, la ley, los decretos del Gobierno, las ordenanzas y los acuerdos del Concejo, dirigir la acción administrativa del municipio; asegurar el cumplimiento de las funciones y la prestación de los servicios a su cargo. El artículo 63 de la Ley 99 de 1993, establece las funciones de las entidades territoriales en materia ambiental, cuyo ejercicio debe sujetarse a los principios de armonía regional, gradación normativa y rigor

Expediente No. 25000-23-27-000-2001-0479-01  
Acumulados Nos. 2000-0428, 2001-0122, 2001-0343  
Actor: GUSTAVO MOYA ÁNGEL Y OTROS  
Acción Popular

subsidiario. Ello significa que las autoridades referidas ejercerán sus funciones constitucionales y legales relacionadas con el medio ambiente y los recursos naturales renovables, de manera coordinada y armónica, con sujeción a las normas de carácter superior; las reglas que dicten respetarán el carácter superior y la preeminencia jerárquica de las normas dictadas por autoridades y entes de superior jerarquía o de mayor ámbito en la comprensión territorial de sus competencias y serán más rigurosas, pero no más flexibles en la medida en que se desciende en la jerarquía normativa y se reduce el ámbito territorial de las competencias.

El Ministerio del Medio Ambiente es la máxima autoridad ambiental de Colombia y fue creado en el año de 1993, mediante la ley 99. Sus objetivos son, entre otros, impulsar las políticas y regulaciones a las que se sujetarán la recuperación, conservación, protección, ordenamiento, manejo, uso y aprovechamiento de los recursos naturales renovables y del medio ambiente de la nación, a fin de asegurar el desarrollo sostenible.

La ley 1450 de 2011, mediante la cual se formula el Plan Nacional de Desarrollo 2010-2014, indica que "durante el cuatrienio 2010-2014 se incorporarán los siguientes ejes transversales en todas las esferas del quehacer nacional: "(...) una sociedad a la cual la sostenibilidad ambiental, la adaptación al cambio climático, el acceso a las tecnologías de la información y las comunicaciones y el desarrollo cultural sean una prioridad y una práctica como elemento esencial del bienestar y como principio de equidad con las futuras generaciones".

El Ministerio de Medio Ambiente (hoy Ministerio de Ambiente y Desarrollo Sostenible), fue creado por la Ley 99 de 22 de diciembre de 1993, como organismo rector de la gestión del medio ambiente y de los recursos naturales renovables, encargado de impulsar una relación de respeto y armonía del hombre con la naturaleza y de definir las políticas y

Expediente No. 25000-23-27-000-2001-0479-01  
Acumulados Nos. 2000-0428, 2001-0122, 2001-0343  
Actor: GUSTAVO MOYA ÁNGEL Y OTROS  
Acción Popular

regulaciones a las que se sujetarán la recuperación, conservación, protección, ordenamiento, manejo, uso y aprovechamiento de los recursos naturales renovables y el medio ambiente de la Nación a fin de asegurar el desarrollo sostenible.

Además, reserva, delimita, sustrae y administra las áreas que integran el Sistema de Parques Nacionales Natural. Asimismo, coordina, promueve, y orienta acciones de investigación sobre el medio ambiente y los recursos naturales renovables, como también fija pautas generales de conservación, preservación, uso, ordenamiento y dirección de las cuencas hidrográficas y demás áreas de manejo ambiental como las zonas marinas y costeras.

Las Corporaciones Autónomas Regionales son entes corporativos de carácter público, creados por la Ley 99 de 1993, integrados por las entidades territoriales que por sus características constituyen geográficamente un mismo ecosistema o conforman una unidad geopolítica, biogeográfica o hidrogeográfica, dotados de autonomía administrativa y financiera, patrimonio propio y personería jurídica, encargados por la ley de administrar, dentro del área de su jurisdicción el medio ambiente y los recursos naturales renovables y propender por su desarrollo sostenible, de conformidad con las disposiciones legales y las políticas del MAVDT.

A través de la Unidades Ambientales Urbanas, los municipios, distritos o áreas metropolitanas cuya población urbana sea igual o superior a un millón de habitantes (grandes centros urbanos) ejercen las mismas funciones atribuidas a las Corporaciones Autónomas Regionales, dentro del perímetro urbano. Además de las licencias ambientales, concesiones, permisos y autorizaciones que les corresponde otorgar para el ejercicio de actividades o la ejecución de obras dentro del territorio de su jurisdicción las autoridades municipales, distritales o metropolitanas tienen la responsabilidad de

Expediente No. 25000-23-27-000-2001-0479-01  
Acumulados Nos. 2000-0428, 2001-0122, 2001-0343  
Actor: GUSTAVO MOYA ÁNGEL Y OTROS  
Acción Popular

efectuar el control de vertimientos y emisiones contaminantes, disposición de desechos sólidos y de residuos tóxicos y peligrosos, dictar las medidas de corrección o mitigación de daños ambientales y adelantar proyectos de saneamiento y descontaminación.

A través de la Unidades Ambientales Urbanas, los municipios, distritos o áreas metropolitanas cuya población urbana sea igual o superior a un millón de habitantes (grandes centros urbanos) ejercen las mismas funciones atribuidas a las Corporaciones Autónomas Regionales, dentro del perímetro urbano. Además de las licencias ambientales, concesiones, permisos y autorizaciones que les corresponde otorgar para el ejercicio de actividades o la ejecución de obras dentro del territorio de su jurisdicción las autoridades municipales, distritales o metropolitanas tienen la responsabilidad de efectuar el control de vertimientos y emisiones contaminantes, disposición de desechos sólidos y de residuos tóxicos y peligrosos, dictar las medidas de corrección o mitigación de daños ambientales y adelantar proyectos de saneamiento y descontaminación.

**Corporaciones Autónomas Regionales para el Desarrollo Sostenible.**

Además de las funciones propias de las Corporaciones Autónomas Regionales, tienen como encargo principal promover el conocimiento de los recursos naturales renovables y del medio ambiente de la región; ejercer actividades de promoción de investigación científica y transferencia de tecnología; dirigir el proceso de planificación regional de uso del suelo para mitigar o desactivar presiones de explotación inadecuadas del territorio; fomentar la integración de las comunidades tradicionales que habitan la región y de sus métodos ancestrales de aprovechamiento de la naturaleza al proceso de conservación, protección y aprovechamiento sostenible de los recursos, y de propiciar, con la cooperación de entidades nacionales e internacionales, la

Expediente No. 25000-23-27-000-2001-0479-01  
 Acumulados Nos. 2000-0428, 2001-0122, 2001-0343  
 Actor: GUSTAVO MOYA ÁNGEL Y OTROS  
 Acción Popular

generación de tecnologías apropiadas para la utilización y conservación de los recursos de la región<sup>218</sup>.

De otra parte la Ley 99 de 1993, en el estricto ámbito del ejercicio de las competencias de las autoridades ambientales, señala en los incisos 10 y 14 del artículo 1, el cual contiene los principios de la política ambiental colombiana, lo siguiente:

10. La acción para la protección y recuperación ambientales del país es una tarea conjunta y coordinada entre el Estado, la comunidad, las organizaciones no gubernamentales y el sector privado. El Estado apoyará e incentivará la conformación de organismos no gubernamentales para la protección ambiental y podrá delegar en ellos algunas de sus funciones. (La subraya no es del texto).
14. Las instituciones ambientales del Estado se estructurarán teniendo como base criterios de manejo integral del medio ambiente y su interrelación con los procesos de planificación económica, social y física. (La subraya no es del texto).

En la misma Ley, el artículo 31, el cual establece las funciones que deben desempeñar las Corporaciones Autónomas Regionales, menciona el criterio de coordinación con otras autoridades e instancias ambientales y de otros sectores; pero en particular, el parágrafo 4º del citado artículo establece de forma expresa que:

Las Corporaciones Autónomas Regionales realizarán sus tareas en estrecha coordinación con las entidades territoriales y con los organismos a las que éstas hayan asignado responsabilidades de su competencia.

Cabe anotar que a pesar de existir una normativa amplia que regula las competencias en materia ambiental, los estudiosos del tema consideran que "(...) *no existe disposición por parte de ellas para coordinar, concurrir, cooperar o subsidiar el trabajo entre autoridades. En vez de pujar por el logro de los objetivos comunes que rigen sus actuaciones, lo que existe es una permanente pugna por ejercer exclusiva y privativamente las competencias, sin entender que es necesario trabajar de manera armónica, colaborativa,*

---

<sup>218</sup> Fuente formal Constitución Política, Ley 99 de 1993.

Expediente No. 25000-23-27-000-2001-0479-01  
Acumulados Nos. 2000-0428, 2001-0122, 2001-0343  
Actor: GUSTAVO MOYA ÁNGEL Y OTROS  
Acción Popular

*coordinada y cooperante para garantizar el derecho de todos los colombianos a un medio ambiente sano (...) <sup>219</sup>.*

Dentro de este contexto, y para los efectos perseguidos con esta sentencia de lograr una gestión integral para la cuenca del Río Bogotá con miras a su recuperación y desarrollo sostenible, resulta fundamental precisar el papel que las autoridades deben asumir frente a la problemática que hoy vive la cuenca, por ello consideramos que resulta suficientemente ilustrativa y por lo tanto adoptamos en esta sentencia la tabla funcional que a continuación presenta de manera clara la interacción de las autoridades para el ejercicio de funciones en la cuenca de acuerdo con sus competencias.

"Tabla 6.1. Identificación de los actores según tipología funcional en la RHCB

| ORDEN | Actores/Tipología funcional                                            | Formulación De políticas y normas | Planeación y administración del agua | Planeación del territorio y usos del suelo | Gestión de servicios del agua | Uso del agua | Generación de conocimiento e información | Seguimiento, monitoreo y control | Prevención y mitigación del riesgo |
|-------|------------------------------------------------------------------------|-----------------------------------|--------------------------------------|--------------------------------------------|-------------------------------|--------------|------------------------------------------|----------------------------------|------------------------------------|
|       | Ministerio de ambiente y Desarrollo Sostenible (MADS)                  | X                                 |                                      | X                                          |                               |              | X                                        | X                                |                                    |
|       | Ministerio de Salud y Protección Social (Instituto Nacional de Salud)  | X                                 |                                      |                                            |                               |              | X                                        | X                                | X                                  |
|       | Ministerios sectoriales (Agricultura, Minas y Energía, Vivienda, etc.) | X                                 |                                      | X                                          |                               |              | X                                        |                                  |                                    |

<sup>219</sup> CONFLICTO DE COMPETENCIAS EN EL EJERCICIO DE LOS ASUNTOS AMBIENTALES URBANOS EN EL ÁREA METROPOLITANA DE BARRANQUILLA 187 revista de derecho, universidad del norte, edición especial: 156-188, 2012 ISSN: 0121-8697 (impreso) • ISSN: 2154-9355 (on line)

Expediente No. 25000-23-27-000-2001-0479-01  
Acumulados Nos. 2000-0428, 2001-0122, 2001-0343  
Actor: GUSTAVO MOYA ÁNGEL Y OTROS  
Acción Popular

|          |                                                                                                                                                 |                                                                      |   |   |   |   |   |   |   |   |
|----------|-------------------------------------------------------------------------------------------------------------------------------------------------|----------------------------------------------------------------------|---|---|---|---|---|---|---|---|
|          | Departament<br>o Nacional<br>de<br>Planeación.                                                                                                  |                                                                      | X |   | X |   |   | X | X |   |
|          | Comisión<br>Reguladora<br>de Agua<br>Potable                                                                                                    |                                                                      | X | X |   |   |   |   | X |   |
|          | Superintend<br>encia de<br>Servicios<br>Públicos.                                                                                               |                                                                      | X |   |   |   |   |   | X |   |
|          | IDEAM                                                                                                                                           |                                                                      | X |   |   |   |   | X | X |   |
|          | Autoridades<br>Ambientales<br>(CAR,<br>Corporinoqu<br>ia,<br>Corpoguavio<br>,<br>Cormacarena<br>,<br>Secretaría<br>Distrital<br>de<br>Ambiente) |                                                                      | X | X | X |   |   | X | X | X |
|          | Unidad de<br>Parques<br>Naturales<br>(Chingaza y<br>Sumapaz)                                                                                    |                                                                      | X | X | X |   |   |   | X | X |
| REGIONAL | Departament<br>os de<br>Cundinamarc<br>a y Meta<br>(Secretaria<br>s de<br>Planeación,<br>Salud y de<br>Ambiente)                                |                                                                      | X | X | X | X |   | X | X | X |
|          | Usuarios Intermedios*                                                                                                                           | Empresa<br>de<br>Servicio<br>s<br>Públicos<br>de<br>Cundinam<br>arca |   | X |   | X | X | X | X | X |
|          |                                                                                                                                                 | EAAB-ESP<br>(Concesi<br>onarios<br>y<br>Comprado<br>res de<br>agua)  |   | X | X | X | X | X | X | X |
|          |                                                                                                                                                 | Universidad<br>es y<br>centros de<br>investigaci<br>ón **            |   |   |   |   |   | X | X | X |
|          | Medios de<br>Comunicació<br>n **                                                                                                                |                                                                      |   |   |   |   |   | X | X | X |

Expediente No. 25000-23-27-000-2001-0479-01  
Acumulados Nos. 2000-0428, 2001-0122, 2001-0343  
Actor: GUSTAVO MOYA ÁNGEL Y OTROS  
Acción Popular

\*\* Las universidades, centros de investigación y los medios de comunicación pueden corresponder a los órdenes nacional, regional y local.

| ORDEN | Actores/Tipología funcional                                                                                                                    |                                                                                   | Formulación de políticas y normas | Planeación y administración del agua | Planeación del territorio y usos del suelo | Gestión de servicios del agua | Uso de la agua | Generación de conocimiento e información | Seguimiento, monitoreo y control | Prevención y mitigación del riesgo |
|-------|------------------------------------------------------------------------------------------------------------------------------------------------|-----------------------------------------------------------------------------------|-----------------------------------|--------------------------------------|--------------------------------------------|-------------------------------|----------------|------------------------------------------|----------------------------------|------------------------------------|
|       | LOCAL                                                                                                                                          |                                                                                   |                                   |                                      |                                            |                               |                |                                          |                                  |                                    |
|       | Secretarías de Planeación, Salud y de Ambiente y comités de gestión del riesgo de los municipios de las cuencas Alta, Media y Baja de la RHCB. |                                                                                   | X                                 | X                                    | X                                          | X                             | X              | X                                        | X                                | X                                  |
|       | Distrito Capital (Secretarías de Planeación y de Ambiente)                                                                                     |                                                                                   | X                                 | X                                    | X                                          | X                             |                | X                                        | X                                | X                                  |
|       | Usuarios Intermedios *                                                                                                                         | Empresas municipales de acueducto y alcantarillado                                |                                   | X                                    |                                            | X                             | X              | X                                        | X                                | X                                  |
|       |                                                                                                                                                | Empresas privadas de acueducto                                                    |                                   | X                                    |                                            | X                             | X              | X                                        | X                                | X                                  |
|       | Usuarios Finales*                                                                                                                              | Acueductos comunitarios y veredales                                               |                                   | X                                    |                                            | X                             | X              | X                                        | X                                | X                                  |
|       |                                                                                                                                                | Hogares, agricultores, y ganaderos (vías sus gremios), toma directa por industria |                                   | X                                    | X                                          |                               | X              | X                                        | X                                | X                                  |

Expediente No. 25000-23-27-000-2001-0479-01  
Acumulados Nos. 2000-0428, 2001-0122, 2001-0343  
Actor: GUSTAVO MOYA ÁNGEL Y OTROS  
Acción Popular

|  |  |                                                                                    |  |   |   |  |   |   |   |
|--|--|------------------------------------------------------------------------------------|--|---|---|--|---|---|---|
|  |  | as,<br>industri<br>as<br>mineras,<br>generado<br>res<br>eléctric<br>os<br>(EMGESA) |  |   |   |  |   |   |   |
|  |  | Organiza<br>ciones<br>comunita<br>rias de<br>usuarios                              |  | X | X |  | X | X | X |
|  |  | Defensa<br>Civil y<br>Cruz Roja                                                    |  |   |   |  |   | X | X |

Fuente: "La Región Hídrica Cundinamarca-Bogotá, Una Propuesta Conceptual", julio 2013, Ernesto Guhl Nannetti

Expediente No. 25000-23-27-000-2001-0479-01  
Acumulados Nos. 2000-0428, 2001-0122, 2001-0343  
Actor: GUSTAVO MOYA ÁNGEL Y OTROS  
Acción Popular

#### 1.4.5.5. PARTICIPACION CIUDADANA

La Sala considera que para la gestión integral de la Cuenca del río Bogotá resulta fundamental la participación ciudadana, ya que como se evidencia a lo largo de esta sentencia la solución a la problemática que se registra en la Cuenca obedece a múltiples factores que deben ser evaluados con una visión macrosistémica en donde necesariamente los actores sociales -personas naturales y/o jurídicas no estatales, deben participar en el proceso de discusión y definición para lograr una solución efectiva y sostenible, ya que no sólo se requiere de su concurso sino además de su compromiso.

La Constitución Política señala como deber de la persona y del ciudadano el ejercicio de la participación en la vida política, cívica y comunitaria.

La participación, acorde con los planteamientos hechos por Velásquez F. (1992)<sup>220</sup>, comprende varios niveles: información, consulta, decisión, control y gestión.

La información entendida como el nivel más básico de la participación en el entendido en que previamente o posteriormente a una decisión que ha sido tomada y afecta a un colectivo determinado, los interesados o involucrados conocen la información objeto de discusión, pero no asumen un papel activo dentro del proceso.

La consulta: nivel que trasciende el horizonte de la información, pues no basta conocer la decisión o el hecho concreto, sino que también adquiere relevancia identificar imaginarios individuales y colectivos en función de los intereses, necesidades y puntos de vista.

---

<sup>220</sup> Velásquez, F. (1992) "La participación ciudadana en la democracia", Colombia (mimeo).

Expediente No. 25000-23-27-000-2001-0479-01  
Acumulados Nos. 2000-0428, 2001-0122, 2001-0343  
Actor: GUSTAVO MOYA ÁNGEL Y OTROS  
Acción Popular

La decisión: en este nivel cobra vigencia, además de la información y la expresión de punto de vista sobre un tema concreto, la intervención activa de los individuos en la consecución de alternativas que posibiliten cambios o mejoras frente a un objetivo establecido.

El control: aquí cobra total relevancia la idea de que individuos activos, se interesen por hacer seguimiento - veeduría, a las decisiones que previamente se han tomado y que pueden estar siendo ejecutadas por otros actores. Para el efecto se requiere tener a disposición instrumentos de orden técnico, jurídico y financiero, para que dicho control sea efectivo, esto es, información clara y fiable, para que la labor de control sea eficaz en la inspección, vigilancia, intervención o cualquier otra denominación que le quiera asignar.

La gestión, es el nivel en donde se ponen en juego las habilidades y las competencias que se han logrado adquirir en función de la materialización de los anteriores niveles; en este caso los individuos poseen una serie de aptitudes y capacidades que les permiten asumir responsabilidades sustantivas en pro de mejorar condiciones que se den en la dinámica colectiva de la vida social.

En este contexto la participación es un proceso dinámico y complejo en cuanto requiere de unas mínimas condiciones para su materialización. Además es un proceso continuo que implica que los ciudadanos desarrollen perspectivas críticas y propositivas de los ciudadanos como miembros activos de la sociedad.

Dentro de este contexto la Ley 472 de 1998, por la cual se desarrolla el artículo 88 de la Carta Política en relación con el ejercicio de acciones populares, el artículo 34 prevé la posibilidad de crear un Comité para la verificación del cumplimiento de la sentencia en el cual participarán además

Expediente No. 25000-23-27-000-2001-0479-01  
 Acumulados Nos. 2000-0428, 2001-0122, 2001-0343  
 Actor: GUSTAVO MOYA ÁNGEL Y OTROS  
 Acción Popular

del juez, las partes, las entidades públicas encargadas de velar por el derecho o interés colectivo, el Ministerio Público y una organización no gubernamental con actividades en el objeto del fallo.

En estos términos habiéndose dispuesto por el Tribunal de instancia en el numeral Décimo de la parte resolutive de la sentencia constituir el Comité para la verificación de la sentencia, bajo la coordinación de la Gerencia de Cuenca, se dispondrá su integración así:

ASOMUÑA, la FUNDACIÓN AL VERDE VIVO, la FUNDACIÓN AMIGOS DEL PLANETA, la O. N. G. - GIRARDOTEMOS y LA FUNDACIÓN AMBIENTAL ALTO MAGDALENA, la FUNDACIÓN HUMEDAL LA CONEJERA, la CORPORACIÓN SIE, la CORPORACIÓN MOVIMIENTO POR LA VIDA y la CORPORACIÓN MADRE TIERRA., los PROCURADORES JUDICIALES AMBIENTALES Y AGRARIOS CON JURISDICCIÓN EN LOS MUNICIPIOS DE LA CUENCA DEL RÍO BOGOTÁ, el Procurador Delegado para asuntos ambientales y agrarios o su delegado y el Procurador Delegado para la Conciliación Administrativa como Agente del Ministerio Público o su delegado y el delegado de la Defensoría del Pueblo.

El Comité designado por el tribunal debe, acorde con las directrices establecidas por la Gerencia de Cuenca hacer seguimiento al cumplimiento de la sentencia.

Se deben igualmente integrar subcomités para cada una de las subcuencas con la intervención de la autoridad municipal y la comunidad acorde con sus precisas necesidades y de conformidad con los lineamientos fijados por la Gerencia de Cuenca, así como reglamentar su operatividad bajo la directriz de la Magistrada Sustanciadora, los cuales deben rendir un informe trimestral al tribunal y a la Gerencia de Cuenca o en el momento en que las circunstancias lo hagan necesario con el fin de adoptar las decisiones a que haya

Expediente No. 25000-23-27-000-2001-0479-01  
Acumulados Nos. 2000-0428, 2001-0122, 2001-0343  
Actor: GUSTAVO MOYA ÁNGEL Y OTROS  
Acción Popular

lugar los correctivos, en caso de incumplimiento de lo pactado o de las órdenes impartidas en este fallo.

En los subcomités deberá participar igualmente las autoridades ambientales competentes, la Procuraduría General de la Nación a través de la Procuraduría Delegada para Asuntos Ambientales y Agrarios, la Defensoría del Pueblo y una ONG o persona experta en el tema ambiental.

En el subcomité de vigilancia de los municipios deben participar los Procuradores Judiciales Ambientales y Agrarios que tiene jurisdicción en el respectivo municipio y un delegado del Gobernador del Departamento de Cundinamarca.

Constituidos el Comité y los subcomités la Gerencia de Cuenca coordinará, vigilará y asegurará el cumplimiento de las decisiones tomadas en esta sentencia como se prevé en el inciso final del artículo 27 de la Ley 472, así como garantizar que los recursos afectos para el cumplimiento de todas y cada una de las obligaciones que las partes contraen no se distraigan.

En razón de la naturaleza de la acción y la necesidad de lograr la salvaguarda de los derechos colectivos y del ambiente, una vez en firme esta sentencia el Consejero ponente convocará a las partes a una audiencia para integrar el comité y los subcomités de vigilancia, la que tendrá como fin el exponer cuáles obligaciones de las ya pactadas se han cumplido (resaltándose que algunas ya debieron ejecutarse en consideración a las obras que con cargo a sus presupuestos se han proyectado y cuál es el estado de los planes y programas que se han prometido ejecutar, como aquellas que por ley como autoridades ambientales les corresponde ejercer y cumplir según los términos de la Ley 99 de 1993. Así mismo, para evaluar los resultados de las gestiones, acciones y obras que a cada una de las entidades corresponde desarrollar en dicha

Expediente No. 25000-23-27-000-2001-0479-01  
Acumulados Nos. 2000-0428, 2001-0122, 2001-0343  
Actor: GUSTAVO MOYA ÁNGEL Y OTROS  
Acción Popular

audiencia se constituirá la Gerencia de Cuenca y se señalará la fecha y términos para llevar a cabo las demás audiencias.

La Sala podrá solicitar los informes que considere necesarios a las autoridades y a los particulares para establecer el cumplimiento de las obligaciones impuestas en esta providencia.

#### **MONITOREO EVALUACIÓN Y SEGUIMIENTO.**

La gestión integral para la Cuenca del río Bogotá pretende conciliar el desarrollo económico y social con la protección de los ecosistemas. No es posible, en estos términos lograr los resultados esperados sin un seguimiento y monitoreo de las metas e indicadores propuestos, el análisis de resultados y las acciones correctivas.

Para ello resulta fundamental optimizar, complementar y mantener en operación permanente la red de monitoreo de calidad y cantidad del agua, en la Cuenca del río Bogotá con la integración de las redes de monitoreo del IDEAM y la CAR; continuar con el programa de certificación y acreditación de los laboratorios ambientales que desarrolla el IDEAM; articular y optimizar las redes y los programas de monitoreo regional -cuenca río Bogotá a través del respectivo protocolo; incrementar y/o mejorar los sistemas de monitoreo, seguimiento y evaluación de los vertimientos, para que permitan conocer periódicamente su evolución, así como la calidad y el estado de los cuerpos de agua receptores priorizados en el Plan de Gestión Integral.

Igualmente, es indispensable la generación y divulgación de información sobre los riesgos que afectan la oferta y disponibilidad hídrica, fomentar y desarrollar el manejo de la información relacionada con el recurso hídrico, los usos del suelo, las zonas de especial protección, los humedales,

Expediente No. 25000-23-27-000-2001-0479-01  
Acumulados Nos. 2000-0428, 2001-0122, 2001-0343  
Actor: GUSTAVO MOYA ÁNGEL Y OTROS  
Acción Popular

las zonas de preservación con el objeto de incrementar en los usuarios del agua conciencia y conocimiento sobre la importancia de conservar y hacer uso sostenible del agua, generar hábitos de comportamiento para disminuir la afectación del recurso por contaminación.

Los indicadores que se proponen en la sentencia constituyen una aproximación al modelo conceptual y a la priorización de las variables, indicadores e índices en el marco del apoyo interinstitucional a la sentencia del rio Bogotá, por eje de análisis, más representativos y de importancia sistémica para abordar la sentencia sobre la recuperación y sostenibilidad de la cuenca del rio Bogotá.

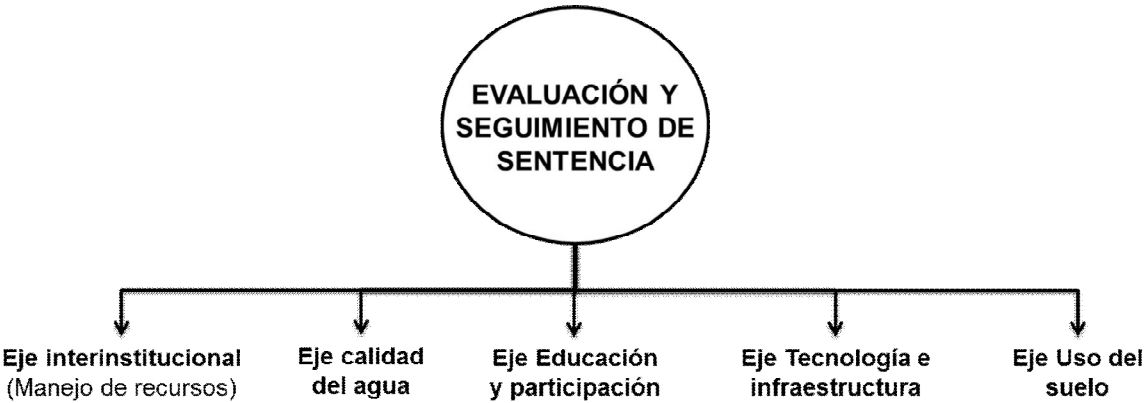

**Indicadores**

1.1. Desarrollo Territorial Sostenible

Expediente No. 25000-23-27-000-2001-0479-01  
Acumulados Nos. 2000-0428, 2001-0122, 2001-0343  
Actor: GUSTAVO MOYA ÁNGEL Y OTROS  
Acción Popular

| Nombre del Indicador                                              | Unidad Espacial | Temporalidad | Fuente<br>Quién procesa y suministra | REGULACIÓN<br>Normatividad asociada al dato | Última versión | Disponibilidad | Prioridad |
|-------------------------------------------------------------------|-----------------|--------------|--------------------------------------|---------------------------------------------|----------------|----------------|-----------|
| Índice de desempeño integral municipal                            | Municipio       | Anual        | DNP                                  | Ley 617 de 2000                             | 2011           | Si             | Alta      |
| Magnitud de la inversión                                          | Municipio       | Anual        | DNP                                  |                                             | 2011           | Si             | Media     |
| Índice de Riesgo de Calidad del Agua                              | Municipio       | Anual        | DNP                                  | Decreto 1575 de 2007                        | 2011           | Si             | Alta      |
| Metros cúbicos de agua producida (zona urbana y centros poblados) | Municipio       | Anual        | SICEP                                |                                             | 2011           | Si             | Alta      |
| Número de Viviendas conectadas al servicio de acueducto           | Municipio       | Anual        | DNP                                  |                                             | 2011           | Si             | Media     |
| Inversión total en agua potable y saneamiento básico              | Municipio       | Anual        | DNP                                  |                                             | 2011           | Si             | Alta      |
| Índice de integración interinstitucional                          | Proyecto        | Anual        |                                      |                                             |                | No             | Alta      |
| Indicador de articulación de los PDM y POT                        | Cuenca          |              |                                      |                                             |                | No             |           |

|                                                                   |           |       |       |                      |      |    |       |
|-------------------------------------------------------------------|-----------|-------|-------|----------------------|------|----|-------|
| Índice de desempeño integral municipal                            | Municipio | Anual | DNP   | Ley 617 de 2000      | 2011 | Si | Alta  |
| Magnitud de la inversión                                          | Municipio | Anual | DNP   |                      | 2011 | Si | Media |
| Índice de Riesgo de Calidad del Agua                              | Municipio | Anual | DNP   | Decreto 1575 de 2007 | 2011 | Si | Alta  |
| Metros cúbicos de agua producida (zona urbana y centros poblados) | Municipio | Anual | SICEP |                      | 2011 | Si | Alta  |
| Número de Viviendas                                               | Municipio | Anual | DNP   |                      | 2011 | Si | Media |

Expediente No. 25000-23-27-000-2001-0479-01  
Acumulados Nos. 2000-0428, 2001-0122, 2001-0343  
Actor: GUSTAVO MOYA ÁNGEL Y OTROS  
Acción Popular

|                                                      |           |       |     |  |      |    |      |
|------------------------------------------------------|-----------|-------|-----|--|------|----|------|
| conectadas al servicio de acueducto                  |           |       |     |  |      |    |      |
| Inversión total en agua potable y saneamiento básico | Municipio | Anual | DNP |  | 2011 | Si | Alta |
| Índice de integración interinstitucional             | Proyecto  | Anual |     |  |      | No | Alta |
| Indicador de articulación de los PDM y POT           | Cuenca    |       |     |  |      | No |      |

Expediente No. 25000-23-27-000-2001-0479-01  
Acumulados Nos. 2000-0428, 2001-0122, 2001-0343  
Actor: GUSTAVO MOYA ÁNGEL Y OTROS  
Acción Popular

1.2. Usos del suelo

| Eje de seguimiento    Uso del suelo |                                                                                                                                                                       |                 |              |                                       |                   |              |     |           |
|-------------------------------------|-----------------------------------------------------------------------------------------------------------------------------------------------------------------------|-----------------|--------------|---------------------------------------|-------------------|--------------|-----|-----------|
| Nombre del indicador                | Descripción                                                                                                                                                           | Unidad espacial | Temporalidad | Fuente:<br>Quien procesa y suministra | Regulación        | versión      | dad | Prioridad |
| Conflicto de uso del suelo          | Corresponde al análisis de la vocación en relación con el uso actual.<br><br>Analiza el desarrollo de actividades en el suelo que no están de acuerdo con su vocación | Municipal       | Anual        | Municipio, CAR                        | Ley 388, ley 1523 | actualizados | si  | Alta      |

Expediente No. 25000-23-27-000-2001-0479-01  
Acumulados Nos. 2000-0428, 2001-0122, 2001-0343  
Actor: GUSTAVO MOYA ÁNGEL Y OTROS  
Acción Popular

| Impacto                                            |                                                                                                                                                             |                                                               |              |                                       |                                           |                |     |           |
|----------------------------------------------------|-------------------------------------------------------------------------------------------------------------------------------------------------------------|---------------------------------------------------------------|--------------|---------------------------------------|-------------------------------------------|----------------|-----|-----------|
| Nombre del indicador                               | Descripción                                                                                                                                                 | Unidad espacial                                               | Temporalidad | Fuente:<br>Quien procesa y suministra | Regulación                                | Última versión | dad | Prioridad |
| Capacidad de soporte relacionado con el uso actual | Corresponde a las características del suelo y su capacidad de carga frente a la ocupación actual, para identificar inconsistencias en estas dos condiciones | Municipios (planeación secretaria de ambiente), departamentos | Semestral    | Municipio, CAR                        | Plan de gestión ambiental, POMCA, Ley 388 | POT            | Si  | Alta      |

Expediente No. 25000-23-27-000-2001-0479-01  
Acumulados Nos. 2000-0428, 2001-0122, 2001-0343  
Actor: GUSTAVO MOYA ÁNGEL Y OTROS  
Acción Popular

|                                                                                                                             |                                                                                                                     |                                                       |           |                |                            |                                   |    |      |
|-----------------------------------------------------------------------------------------------------------------------------|---------------------------------------------------------------------------------------------------------------------|-------------------------------------------------------|-----------|----------------|----------------------------|-----------------------------------|----|------|
| Legalidad de los asentamientos relacionados con consolidación y estado de redes (Cobertura de redes frente a asentamientos) | Asentamientos establecidos legales e ilegales en relación con la cobertura adecuada de redes de servicios públicos. | Planeación, (Empresas de servicios públicos)          | Semestral | Municipio, CAR | Ley 388, Ley 1506, ley 142 | POT. Planeación municipal. SISBEN | Si | Alta |
| Asentamientos relacionados con zonas de riesgo natural                                                                      | Corresponde al área de la cuenca que por efecto de reasentamientos se acoge con el uso correspondiente              | Planeación - Municipio, Unidad de Gestión del Riesgo, | Semestral | Municipio      | POMCA, Ley 388             | POT                               | Si | Alta |

Expediente No. 25000-23-27-000-2001-0479-01  
Acumulados Nos. 2000-0428, 2001-0122, 2001-0343  
Actor: GUSTAVO MOYA ÁNGEL Y OTROS  
Acción Popular

| Riesgo antrópico                                                                                     |                                                                                                                                               |                                                                                               |              |                                       |            |                         |                |           |
|------------------------------------------------------------------------------------------------------|-----------------------------------------------------------------------------------------------------------------------------------------------|-----------------------------------------------------------------------------------------------|--------------|---------------------------------------|------------|-------------------------|----------------|-----------|
| Nombre del indicador                                                                                 | Descripción                                                                                                                                   | Unidad espacial                                                                               | Temporalidad | Fuente:<br>Quien procesa y suministra | Regulación | última versión          | Disponibilidad | Prioridad |
| Capacidad de soporte (medido en capacidad de resiliencia de los ecosistemas) frente a uso industrial | Corresponde a las características del suelo y su capacidad de carga frente a la ocupación industrial actual, para identificar inconsistencias | Municipio (Sec de ambiente, Secretaría de planeación, Secretaría de agricultura departamental | Trimestral   | Secretaría de ambiente                | LEY 388    | CAR. Sec de agricultura | Si             | Alta      |

Expediente No. 25000-23-27-000-2001-0479-01  
Acumulados Nos. 2000-0428, 2001-0122, 2001-0343  
Actor: GUSTAVO MOYA ÁNGEL Y OTROS  
Acción Popular

|                                                                          |                                                                                                                                          |                                                                                     |           |                                            |                                                  |                           |    |       |
|--------------------------------------------------------------------------|------------------------------------------------------------------------------------------------------------------------------------------|-------------------------------------------------------------------------------------|-----------|--------------------------------------------|--------------------------------------------------|---------------------------|----|-------|
|                                                                          | en estas dos condiciones                                                                                                                 |                                                                                     |           |                                            |                                                  |                           |    |       |
| Mantenimiento de maquinaria. Automotores frente a aceite dispuesto final | Mide la disminución de efectos sobre la cuenca por disposición adecuada de aceites, producidos por mantenimiento de maquinaria y equipos | Secretaría de planeación municipal, secretaría de ambiente, secretaría de movilidad | Mensual   | secretaría de Vías, secretaría de ambiente | Manual técnico para manejo de aceites usados CAR | ACP y Movilidad distrital | Si | Media |
| Volúmenes de residuos sólidos frente a soluciones efectivas en           | Mide la disminución de efectos sobre la cuenca por puesta en                                                                             | Municipios, las empresas de servicios públicos,                                     | semestral | ASP, Secretaría de ambiente                | Decreto 838 de 2005, Ley 388, POMCA,             | PGIRS                     | Si | Alta  |

Expediente No. 25000-23-27-000-2001-0479-01  
 Acumulados Nos. 2000-0428, 2001-0122, 2001-0343  
 Actor: GUSTAVO MOYA ÁNGEL Y OTROS  
 Acción Popular

|                                                                              |                                                                                                                                |                                                                                                    |           |                                      |                                            |                      |    |      |
|------------------------------------------------------------------------------|--------------------------------------------------------------------------------------------------------------------------------|----------------------------------------------------------------------------------------------------|-----------|--------------------------------------|--------------------------------------------|----------------------|----|------|
| marcha                                                                       | marcha de<br>proyecto<br>integral                                                                                              |                                                                                                    |           |                                      |                                            |                      |    |      |
| Disminución de<br>producción de<br>residuos.                                 | Mide la<br>disminución de<br>efectos sobre<br>la cuenca por<br>puesta en<br>marcha de<br>proyecto<br>integral                  | ESP                                                                                                | semestral | ASP,<br>Secretaría<br>de<br>ambiente | Decreto 838<br>de 2005, Ley<br>388, POMCA, | Habría que construir | No | Alta |
| Minería -<br>Sistemas de<br>extracción<br>frente a<br>sistemas<br>permitidos | Mide el avance<br>de cumplimiento<br>de la<br>reglamentación<br>nacional frente<br>a los sistemas<br>usados.<br>Pretende hacer | Secretaría de<br>desarrollo,<br>secretaría de<br>planeación,<br>secretaría de<br>medio<br>ambiente | Semestral | Secretaría<br>de<br>ambiente         | POMCA, POT                                 | Planeación. ANM      | Si | Alta |

Expediente No. 25000-23-27-000-2001-0479-01  
Acumulados Nos. 2000-0428, 2001-0122, 2001-0343  
Actor: GUSTAVO MOYA ÁNGEL Y OTROS  
Acción Popular

|                      |                                                                                |                         |              |                                        |            |                |                |           |
|----------------------|--------------------------------------------------------------------------------|-------------------------|--------------|----------------------------------------|------------|----------------|----------------|-----------|
|                      | seguimiento al establecimiento y legalización de extracción minera de canteras |                         |              |                                        |            |                |                |           |
| Riesgo Natural       | Zonas de riesgo por fenómenos naturales                                        | Secretarías de ambiente |              | Secretaría de ambiente, CAR, Municipio | POT; POMCA | 2011           | si             | Alta      |
| Riesgo antrópico     |                                                                                |                         |              |                                        |            |                |                |           |
| Nombre del indicador | Descripción                                                                    | Unidad espacial         | Temporalidad | Fuente:<br>Quien procesa y suministra  | Regulación | última versión | Disponibilidad | Prioridad |

Expediente No. 25000-23-27-000-2001-0479-01  
 Acumulados Nos. 2000-0428, 2001-0122, 2001-0343  
 Actor: GUSTAVO MOYA ÁNGEL Y OTROS  
 Acción Popular

|                                                                                 |                                                                                                                                                                    |                                                                                  |           |                                             |                                      |              |            |       |
|---------------------------------------------------------------------------------|--------------------------------------------------------------------------------------------------------------------------------------------------------------------|----------------------------------------------------------------------------------|-----------|---------------------------------------------|--------------------------------------|--------------|------------|-------|
| Requerimientos de reconversión tecnológica frente a necesidades de reconversión | Mide la efectividad de las acciones de reconversión tecnológica con relación a las necesidades establecidas y su impacto sobre las áreas prioritarias de la cuenca | Secretaría de desarrollo, secretaría de planeación, secretaría de medio ambiente | Semestral | Secretaría de ambiente                      |                                      | Min ambiente | En estudio | Media |
| Número de planes de manejo y restauración para explotación minera en ejecución  | Se propone para hacer seguimiento a los planes de manejo para la extracción minera.                                                                                | Secretaría de desarrollo, secretaría de planeación, secretaría de medio ambiente | Semestral | Secretaría de minas, Secretaría de ambiente | POT, Guías minero ambientales, POMCA | Secretaria   | Si         | Alta  |

Expediente No. 25000-23-27-000-2001-0479-01  
 Acumulados Nos. 2000-0428, 2001-0122, 2001-0343  
 Actor: GUSTAVO MOYA ÁNGEL Y OTROS  
 Acción Popular

|                                                                             |                                                                              |                                                                                  |           |                                        |                                        |                            |    |       |
|-----------------------------------------------------------------------------|------------------------------------------------------------------------------|----------------------------------------------------------------------------------|-----------|----------------------------------------|----------------------------------------|----------------------------|----|-------|
| frente a proyectos elaborados                                               |                                                                              |                                                                                  |           |                                        |                                        |                            |    |       |
| Seguimiento a acuerdos de producción más limpia firmados frente a cumplidos | Mide los acuerdos firmados frente a la eficiencia de disminución de impactos | Secretaría de desarrollo, secretaría de planeación, secretaría de medio ambiente | Semestral | Secretaría de ambiente                 | Política de producción más limpia, POT | MINISTERIO AMBIENTE<br>SDA | Si | Media |
| Nuevos acuerdos firmados frente a las necesidades de control                | Basado en las necesidades                                                    | Secretaría de desarrollo, secretaría de planeación, secretaría de medio ambiente | Semestral | Secretaría de ambiente, Municipio, CAR | Política de producción más limpia, POT |                            |    | Media |
| Riesgo Natural                                                              | Zonas de riesgo por fenómenos                                                | Secretarías de ambiente                                                          |           | Secretaría de                          | POT; POMCA                             | 2011                       | si | Alta  |

Expediente No. 25000-23-27-000-2001-0479-01  
Acumulados Nos. 2000-0428, 2001-0122, 2001-0343  
Actor: GUSTAVO MOYA ÁNGEL Y OTROS  
Acción Popular

|  |           |  |  |                                |  |  |  |  |
|--|-----------|--|--|--------------------------------|--|--|--|--|
|  | naturales |  |  | ambiente,<br>CAR,<br>Municipio |  |  |  |  |
|--|-----------|--|--|--------------------------------|--|--|--|--|

1.3. Educación y participación

| Eje de seguimiento a educación y participación |                                                                                                                                              |                     |              |                                                                         |                      |                |                |           |
|------------------------------------------------|----------------------------------------------------------------------------------------------------------------------------------------------|---------------------|--------------|-------------------------------------------------------------------------|----------------------|----------------|----------------|-----------|
| Nombre del indicador                           | Descripción                                                                                                                                  | Unidad espacial     | Temporalidad | Fuente: Quien procesa y suministra                                      | Regulación           | Última versión | Disponibilidad | Prioridad |
| Acciones populares emprendidas y acatadas      | Revisión de acciones populares y el nivel de aplicación de sentencias emitidas                                                               | Municipal           | Anual        | Defensoría del Pueblo                                                   | Ley 1494, Ley 472    |                |                | Alta      |
| Procedas pertinentes y en marcha               | Procedas que se han formulado en torno a la solución de los problemas de la cuenca frente a su puesta en marcha y efectividad de los mismos. | Cuenca y subcuencas | Anual        | Secretaría de educación, CAR, EAAB; SED; SEC de Ambiente, universidades | Decreto 1743 de 1994 | CAR, Acueducto | Si             | Alta      |
| Proyectos de investigación                     | Proyectos de investigación que aportan                                                                                                       | Cuenca              | Semestral    | Colciencias, EAAB,                                                      |                      | Colciencias    | Si             | Mediana   |

Expediente No. 25000-23-27-000-2001-0479-01  
Acumulados Nos. 2000-0428, 2001-0122, 2001-0343  
Actor: GUSTAVO MOYA ÁNGEL Y OTROS  
Acción Popular

|                                                                                                     |                                                                                                                                          |        |               |                                                                                                           |                                        |                                                        |    |      |
|-----------------------------------------------------------------------------------------------------|------------------------------------------------------------------------------------------------------------------------------------------|--------|---------------|-----------------------------------------------------------------------------------------------------------|----------------------------------------|--------------------------------------------------------|----|------|
| ación<br>que<br>aportan<br>solucion<br>es a la<br>cuenca                                            | soluciones a<br>la cuenca                                                                                                                |        |               | CAR,<br>Universi<br>dades                                                                                 |                                        |                                                        |    |      |
| Actualiz<br>ación y<br>uso de<br>informac<br>ión<br>cartográ<br>fica                                | Considerando<br>las escalas<br>adecuadas<br>para el<br>seguimiento y<br>la toma de<br>decisiones                                         | Cuenca | Semestr<br>al | DANE;<br>IGAC;<br>Municipi<br>o, IGAC,<br>gubernac<br>ión                                                 | POMCA,<br>POT                          | IDEA<br>M,<br>CAR,<br>POT                              | Si | Alta |
| Transfer<br>encia<br>del<br>Conocimi<br>ento<br>reflejad<br>a en<br>disminuc<br>ión del<br>problema | Participación<br>, orientación<br>y<br>conocimiento<br>de los<br>concejos y<br>comités para<br>la toma de<br>decisiones y<br>seguimiento | Cuenca | Semestr<br>al | Secretar<br>ía de<br>educació<br>n, CAR,<br>EAAB;<br>SED; SEC<br>de<br>Ambiente<br>,<br>Universi<br>dades | Planes<br>de<br>educac<br>ión,<br>LOOT | Secr<br>etar<br>ía<br>de<br>educ<br>ació<br>n,<br>TICS | Si | Alta |

| Eje de seguimiento a educación y participación |             |                        |                  |                                              |                |                |                |           |
|------------------------------------------------|-------------|------------------------|------------------|----------------------------------------------|----------------|----------------|----------------|-----------|
| Nombre<br>del<br>indicado<br>r                 | Descripción | Unidad<br>espacia<br>l | Tempora<br>lidad | Fuente:<br>Quien<br>procesa<br>y<br>suminist | Regula<br>ción | Última versión | Disponibilidad | Prioridad |

Expediente No. 25000-23-27-000-2001-0479-01  
Acumulados Nos. 2000-0428, 2001-0122, 2001-0343  
Actor: GUSTAVO MOYA ÁNGEL Y OTROS  
Acción Popular

|                                                                                         |                                                                                                                                                          |        |            | ra                                                            |                      |      |    |        |
|-----------------------------------------------------------------------------------------|----------------------------------------------------------------------------------------------------------------------------------------------------------|--------|------------|---------------------------------------------------------------|----------------------|------|----|--------|
| PRAES Y PRAU pertinentes y aplicables a soluciones para causas y problemas de la cuenca | PRAES Y PRAU pertinentes y aplicables a soluciones para causas y problemas de la cuenca                                                                  | Cuenca | Semestral  | Secretaría de educación, CAR, EAAB; SED; SEC de Ambiente, JBB | Decreto 1743 de 1994 | 2012 | Si | Medi a |
| Material es pedagógicos                                                                 | La efectividad de los materiales e instrumentos para la EA y participación en la propuesta de soluciones y resultados de la educación frente al problema | Cuenca | Semestral  | ESP, Secretaría de ambiente                                   |                      |      |    | Medi a |
| Observatorio frente a                                                                   | LA aplicación de la información y                                                                                                                        | Cuenca | Trimestral | Secretaría de educación                                       | LOT. POMCA           |      |    | Medi a |

Expediente No. 25000-23-27-000-2001-0479-01  
Acumulados Nos. 2000-0428, 2001-0122, 2001-0343  
Actor: GUSTAVO MOYA ÁNGEL Y OTROS  
Acción Popular

|                                              |                                                                                                                                                                                               |        |               |                                                                                 |                                                  |                   |    |      |
|----------------------------------------------|-----------------------------------------------------------------------------------------------------------------------------------------------------------------------------------------------|--------|---------------|---------------------------------------------------------------------------------|--------------------------------------------------|-------------------|----|------|
| medidas<br>tomadas                           | evaluaciones<br>resultado del<br>observatorio<br>frente a la<br>aplicación de<br>medidas.                                                                                                     |        |               | n, CAR,<br>EAAB;<br>SED; SEC<br>de<br>Ambiente                                  |                                                  |                   |    |      |
| Pertinen<br>cia de<br>la<br>comunica<br>ción | Formulación y<br>aplicación de<br>un plan de<br>comunicación<br>efectivo para<br>la solución a<br>los problemas<br>de la cuenca.<br><br>Importante<br>construcción<br>de lenguajes<br>comunes | Cuenca | Semestr<br>al | Secretar<br>ía de<br>educació<br>n, CAR,<br>EAAB;<br>SED; SEC<br>de<br>Ambiente | Ley de<br>partic<br>ipació<br>n<br>ciudad<br>ana | POMC<br>A,<br>CAR | Si | Alta |

1.4. Calidad del Agua

Los indicadores regionales del agua deben satisfacer un dominio de variables suficientes para la toma de decisiones. Importante saber a qué deben responder estos indicadores y como en su conjunto e interacción podrían responder de manera sistémica e integral lo que se requiere saber del agua en las regiones. Implica definir indicadores que sean replicables y sostenibles pero a su vez representativos del nivel de aplicación y consistentes en su estructura conceptual y metodológica.

Expediente No. 25000-23-27-000-2001-0479-01  
Acumulados Nos. 2000-0428, 2001-0122, 2001-0343  
Actor: GUSTAVO MOYA ÁNGEL Y OTROS  
Acción Popular

La ERA es un proceso de evaluación del agua en las regiones a partir de la actualización permanente de información y construcción de conocimiento sobre las características, estado y tendencias en sus componentes de oferta y disponibilidad; uso y demanda; contaminación y condiciones de calidad; amenaza y vulnerabilidad.

Ámbito de aplicación

Jurisdicción de la Corporación Autónoma Regional o de la Autoridad Ambiental Urbana de las grandes ciudades con la participación de la Unidad de Parques Nacionales (Nacional y Territoriales).

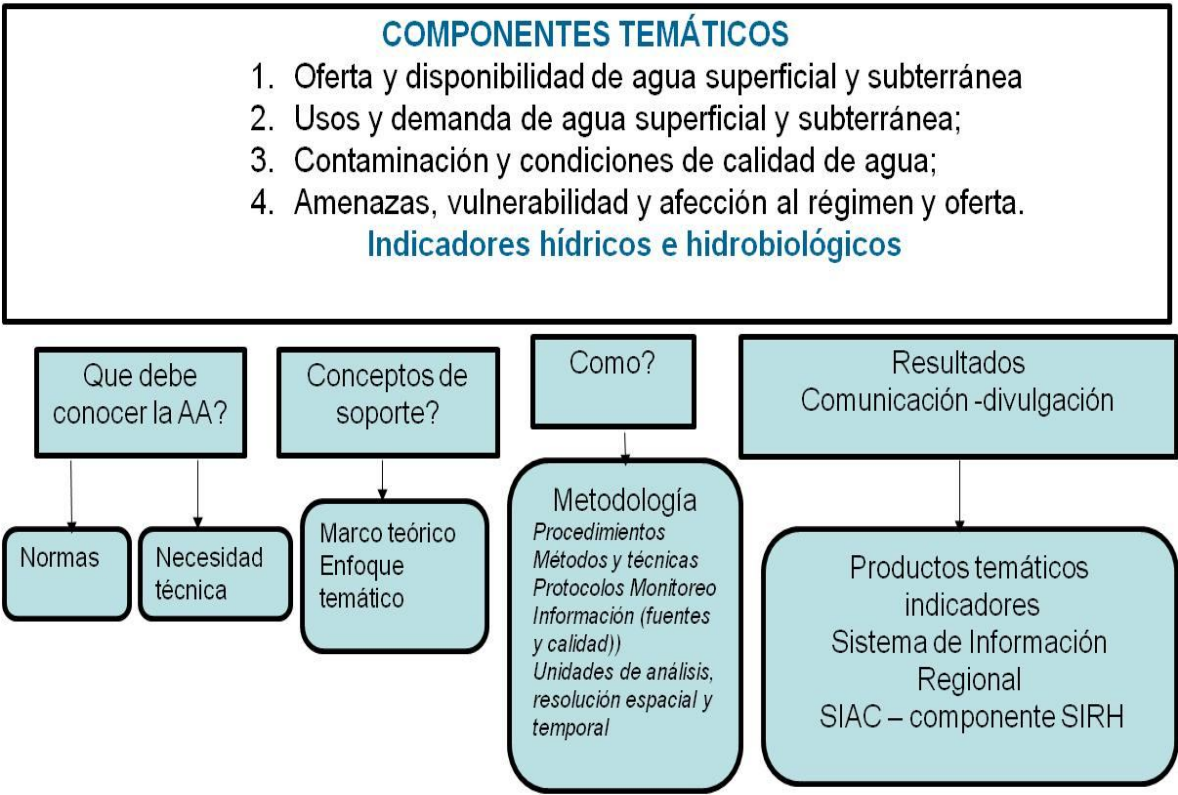

Sistema Indicadores Hídricos Regionales

Expediente No. 25000-23-27-000-2001-0479-01  
Acumulados Nos. 2000-0428, 2001-0122, 2001-0343  
Actor: GUSTAVO MOYA ÁNGEL Y OTROS  
Acción Popular

Fuente

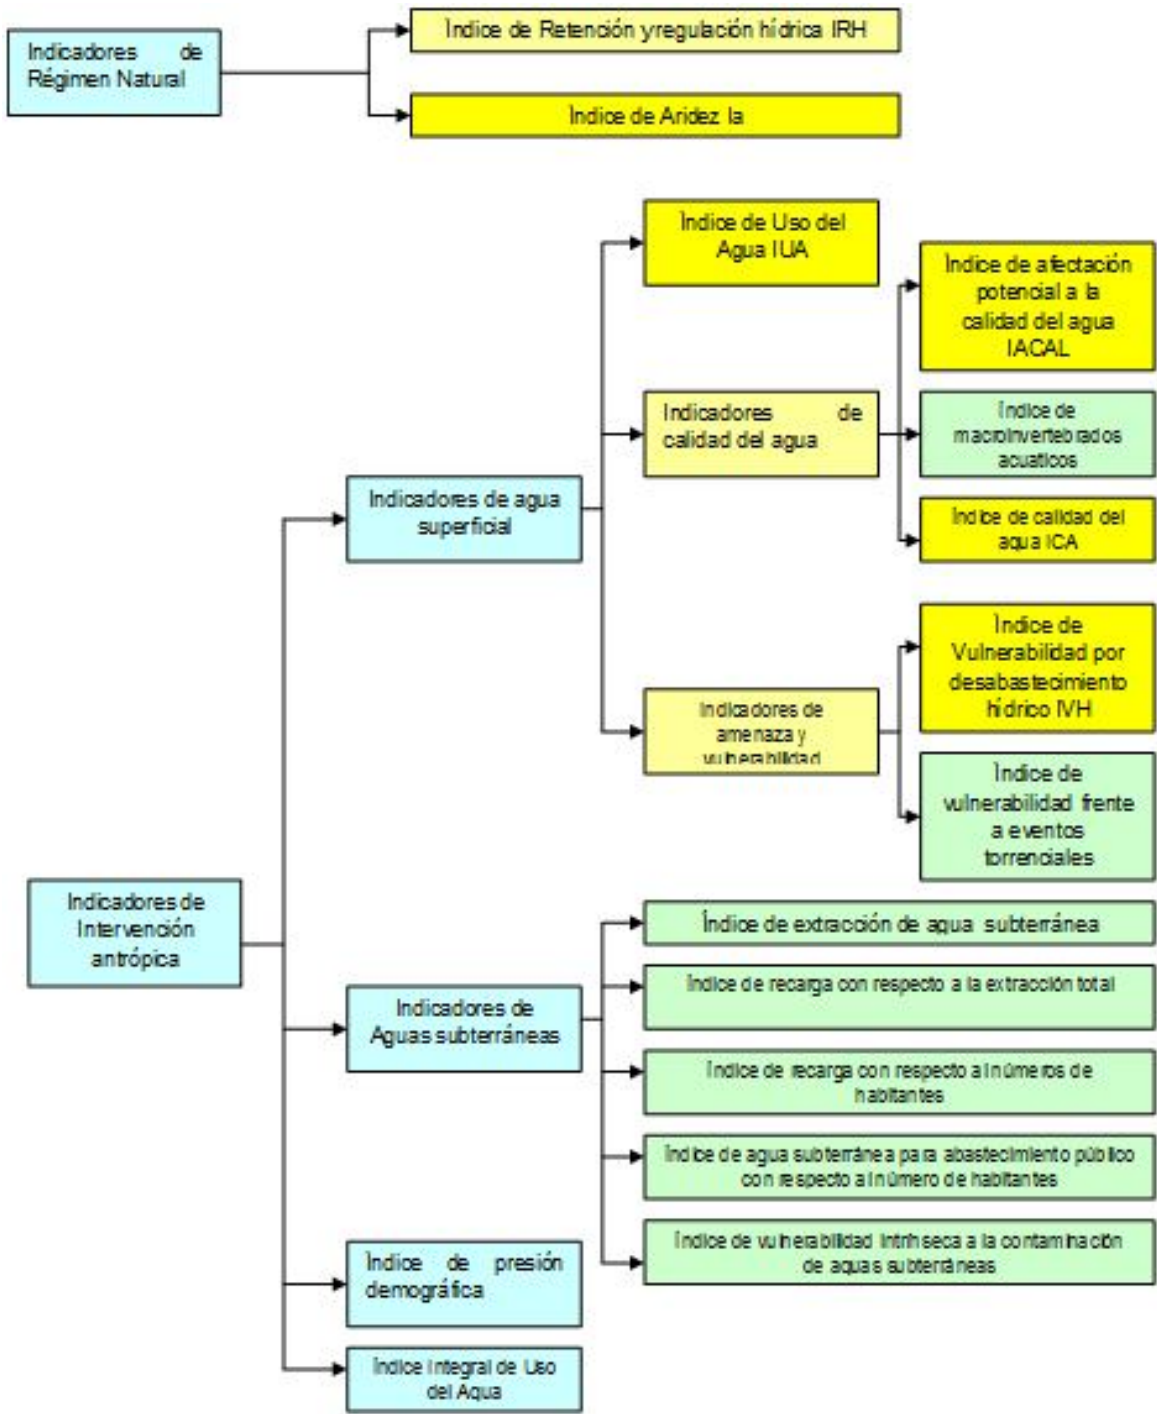

Fuente: Talleres realizados con el IGAC, IDEAM, DANE y la Procuraduría General de la Nación. Modelo conceptual y priorización de variables, indicadores e índices. Septiembre- Noviembre 2013.

Expediente No. 25000-23-27-000-2001-0479-01  
Acumulados Nos. 2000-0428, 2001-0122, 2001-0343  
Actor: GUSTAVO MOYA ÁNGEL Y OTROS  
Acción Popular

Los indicadores deberán ir actualizándose acorde con los avances en la planificación, el conocimiento, los riesgos, el fortalecimiento de la gestión integral a través de la Gerencia de Cuenca, la investigación y la gestión de la información, la sostenibilidad financiera y se adopte la cultura del agua.

Expediente No. 25000-23-27-000-2001-0479-01  
Acumulados Nos. 2000-0428, 2001-0122, 2001-0343  
Actor: GUSTAVO MOYA ÁNGEL Y OTROS  
Acción Popular

#### 1.4. DE LOS RECURSOS DE APELACIÓN INTERPUESTOS

1.- El Ministerio de Educación Nacional solicita se revoquen las órdenes impartidas en los literales k y q del numeral tercero de la sentencia, así como la condena en costas impuesta. El literal k referido a la inclusión de los Proyectos Ambientales Escolares- PRAES en la educación primaria, y media y tecnológica y superior, como cátedra obligatoria y el q) en cuanto ordena a los MINISTERIOS DE LA PROTECCIÓN SOCIAL, DE MINAS Y ENERGÍA, DE COMERCIO EXTERIOR, DE AGRICULTURA y de EDUCACIÓN, así como al DEPARTAMENTO NACIONAL DE PLANEACIÓN para que planeen y ejecuten coordinadamente con el MINISTERIO DE AMBIENTE, VIVIENDA Y DESARROLLO TERRITORIAL todos los programas relacionados con las funciones adscritas en el artículo 5° de la Ley 99 de 1993, según los términos consignados en el punto 6.5.2.

En este orden de ideas son tres los cuestionamientos a resolver:

***1.1. Es viable incluir los PRAES en la educación primaria, media, tecnológica y superior, como cátedra obligatoria?***

Afirma el Ministerio de Educación Nacional que no es procedente la inclusión del Proyecto Ambiental Escolar - PRAE, en ninguno de los niveles de educación primaria, media, tecnológica y superior como cátedra obligatoria, toda vez que la Ley General de Educación ordena que lo ambiental deba desarrollarse como un proyecto transversal.

Expediente No. 25000-23-27-000-2001-0479-01  
Acumulados Nos. 2000-0428, 2001-0122, 2001-0343  
Actor: GUSTAVO MOYA ÁNGEL Y OTROS  
Acción Popular

El Proyecto Ambiental Escolar -PRAE, está concebido dentro del Proyecto Educativo Institucional -PEI, como un eje transversal de la educación básica.

En este sentido asiste razón al Ministerio de Educación Nacional en cuanto no es viable incluir los PRAES como cátedra obligatoria dentro del pensum académico de la educación primaria, media, tecnológica y superior, por su naturaleza de proyecto transversal de la educación.

Sin embargo, la Sala considera que ello no es óbice para que acorde con el legislador, exista la necesidad de fortalecer el Proyecto Educativo Institucional con la inclusión de los PRAES, Proyecto Ambiental Escolar, en los niveles de educación primaria, media, tecnológica y superior con criterio transversal ante la necesidad de interiorizar conceptos que conduzcan a lograr una aprehensión de conocimientos para la protección del medio ambiente y el desarrollo sostenible, no sólo en el orden nacional sino también en el ámbito territorial.

Así lo prevé la recientemente expedida Ley 1549 de 2012, *"por medio de la cual se fortalece la institucionalización de la política nacional de educación ambiental y su incorporación efectiva en el desarrollo territorial"*, al definir la educación ambiental como el derecho y la responsabilidad de participar directamente en dichos procesos, con el fin de apropiar los conocimientos, saberes y formas de aproximarse individual y colectivamente al manejo

Expediente No. 25000-23-27-000-2001-0479-01  
Acumulados Nos. 2000-0428, 2001-0122, 2001-0343  
Actor: GUSTAVO MOYA ÁNGEL Y OTROS  
Acción Popular

sostenible de sus realidades ambientales para valorar y respetar el ambiente.

Igualmente, la ley tiene por objeto fortalecer la institucionalización de la Política Nacional de Educación Ambiental, desde sus propósitos de instalación efectiva en el desarrollo territorial; a partir de la consolidación de estrategias y mecanismos de mayor impacto en los ámbitos locales y nacionales, en materia de sostenibilidad del tema, en los escenarios intra, interinstitucionales e intersectoriales, del desarrollo nacional. Esto, en el marco de la construcción de una cultura ambiental para el país. (Art. 3º)

En este marco dispone que, corresponde al Ministerio de Educación, Ministerio de Ambiente y demás Ministerios asociados al desarrollo de la Política, así como a los departamentos, distritos, municipios, Corporaciones Autónomas Regionales y de Desarrollo Sostenible, y otros entes autónomos con competencias y responsabilidades en el tema, incluir dentro de los Planes de Desarrollo, e incorporar en sus presupuestos anuales, las partidas necesarias para la ejecución de planes, programas, proyectos y acciones, encaminados al fortalecimiento de la institucionalización de la Política Nacional de Educación Ambiental.

Dentro de este contexto dispone en el artículo 7º, el fortalecimiento de la incorporación de la educación ambiental en la educación formal (preescolar, básica, media y superior) y al respecto dispone que *"El Ministerio de Educación Nacional promoverá y acompañará,*

Expediente No. 25000-23-27-000-2001-0479-01  
Acumulados Nos. 2000-0428, 2001-0122, 2001-0343  
Actor: GUSTAVO MOYA ÁNGEL Y OTROS  
Acción Popular

*en acuerdo con las Secretarías de Educación, procesos formativos para el fortalecimiento de los Proyectos Ambientales Escolares (PRAE), en el marco de los PEI, de los establecimientos educativos públicos y privados, en sus niveles de preescolar básica y media, para lo cual, concertará acciones con el Ministerio de Ambiente y con otras instituciones asociadas al desarrollo técnico, científico y tecnológico del tema, así como a sus espacios de comunicación y proyección”.*

Por su parte, el artículo 8° dispone que deberán incorporarse a las dinámicas curriculares de los establecimientos educativos, de manera transversal, problemas ambientales relacionados con los diagnósticos de sus contextos particulares, tales como, cambio climático, biodiversidad, agua, manejo de suelo, gestión del riesgo y gestión integral de residuos sólidos, entre otros, para lo cual, desarrollarán proyectos concretos, que permitan a los niños, niñas y adolescentes, el desarrollo de competencias básicas y ciudadanas, para la toma de decisiones éticas y responsables, frente al manejo sostenible del ambiente.

Dentro de este contexto normativo la transversalidad se predica de los proyectos ambientales, que deben incorporarse en el currículo educativo para resolver los problemas ambientales de acuerdo con la situación propia de la región que comprende la Cuenca Hidrográfica del río Bogotá con sus diversas problemáticas en la cuenca alta, media y baja, en cuanto hace al papel vital del agua, su calidad, su uso adecuado, el ciclo del agua, las amenazas para el

Expediente No. 25000-23-27-000-2001-0479-01  
Acumulados Nos. 2000-0428, 2001-0122, 2001-0343  
Actor: GUSTAVO MOYA ÁNGEL Y OTROS  
Acción Popular

recurso, la superpoblación, las actividades agropecuarias y de minería, entre otros.

Considera la Sala que el Tribunal de instancia no desconoció el Decreto 1743 de 1994, puesto que éste precisa en el artículo 1º:

*Artículo 1º.- Institucionalización. A partir del mes de enero de 1995, de acuerdo con los lineamientos curriculares que defina el Ministerio de Educación Nacional y atendiendo la Política Nacional de Educación Ambiental, todos los establecimientos de educación formal del país, tanto oficiales como privados, en sus distintos niveles de preescolar, básica y media, incluirán dentro de sus proyectos educativos institucionales, proyectos ambientales, escolares, en el marco de diagnósticos ambientales, locales, regionales y/o nacionales, con miras a coadyuvar a la resolución de problemas ambientales específicos (...).*

Dentro de esta normativa, corresponde al Ministerio de Educación Nacional definir los lineamientos curriculares, acorde con la política nacional de educación ambiental, con el objeto de que sean los establecimientos de educación formal en sus distintos niveles los que incluyan dentro de sus proyectos educativos, los ambientales, para contribuir a la solución de los problemas derivados de la contaminación ambiental específica.

Luego, si bien no corresponde al Ministerio de Educación Nacional fijar el currículo, pensum o plan de estudios de los distintos niveles educativos, sí debe fijar sus lineamientos generales, de conformidad con lo establecido en el artículo 5º de la Ley 99 de 1993,

Expediente No. 25000-23-27-000-2001-0479-01  
Acumulados Nos. 2000-0428, 2001-0122, 2001-0343  
Actor: GUSTAVO MOYA ÁNGEL Y OTROS  
Acción Popular

numeral 9º, según el cual corresponde al Ministerio de Ambiente:

"(...)9) Adoptar, **conjuntamente con el Ministerio de Educación Nacional**, a partir de enero de 1995, los planes y programas docentes y el pensum que en los distintos niveles de la educación nacional se adelantarán en relación con el medio ambiente y los recursos naturales renovables, promover con dicho Ministerio programas de divulgación y educación no formal y reglamentar la prestación del servicio ambiental;(...)"

Además, cabe anotar que la Ley 115 de 1994 (Ley General de Educación) en el Artículo 5, inciso 10, define como uno de los fines primordiales de la educación "*La adquisición de una conciencia para la conservación, protección y mejoramiento del medio ambiente, de la calidad de vida, del uso racional de los recursos naturales, de la prevención de desastres, dentro de una cultura ecológica (...)*". El Decreto 1860 de 1994, incluyó entre otros aspectos el Proyecto Educativo Institucional (PEI) que entre sus componentes pedagógicos ubica al Proyecto Ambiental Escolar (PRAE), como uno de los ejes transversales del currículo de la educación básica.

En estos términos, resulta fundamental fortalecer la institucionalización de la educación en materia ambiental y es un compromiso que de manera decidida debe asumir el Ministerio de Educación, acorde con los mandatos constitucionales y legales, sin desconocer que el Proyecto Ambiental Escolar -PRAE, dada su naturaleza transversal no puede ser incluido como cátedra obligatoria.

Expediente No. 25000-23-27-000-2001-0479-01  
Acumulados Nos. 2000-0428, 2001-0122, 2001-0343  
Actor: GUSTAVO MOYA ÁNGEL Y OTROS  
Acción Popular

**1.2. El Ministerio de Educación Nacional tiene competencia para planear y ejecutar coordinadamente con el MINISTERIO DE AMBIENTE, VIVIENDA Y DESARROLLO TERRITORIAL todos los programas relacionados con las funciones adscritas en el artículo 5º de la Ley 99 de 1993, según los términos consignados en el punto 6.5.2. de la sentencia de instancia?**

En el punto 6.5.2. la sentencia considera que la gestión del Ministerio de Educación debe orientarse hacia la adopción de los planes y programas docentes y su inclusión en el *pensum* en los distintos niveles de educación, facultad que de manera expresa consagra la Ley 99 de 1993 en el artículo 5º numeral 9º, transcrito en el numeral anterior.

Por ello, los argumentos de la apelación en este aspecto no están llamados a prosperar.

**1.3. Procede condenar en costas al Ministerio de Educación Nacional?**

En lo atinente a la condena en costas, a pesar de que el Ministerio de Educación Nacional, suscribió un compromiso en primera instancia, cabe anotar que conforme quedó anotado, la condena en costas procede para las acciones populares en los términos establecidos en el código de procedimiento civil e incluye los gastos y agencias en derecho en que se haya incurrido, siempre y cuando se encuentren acreditados dentro del proceso.

En el presente caso los actores fueron determinantes para iniciar la presente acción popular, y así se hayan realizado compromisos para contribuir con la

Expediente No. 25000-23-27-000-2001-0479-01  
Acumulados Nos. 2000-0428, 2001-0122, 2001-0343  
Actor: GUSTAVO MOYA ÁNGEL Y OTROS  
Acción Popular

recuperación de la Cuenca del Río Bogotá, no se desvirtuó por el Ministerio de Educación la omisión endilgada. En estos términos no hay lugar a revocar la condena en costas impuesta al Ministerio de Educación en la sentencia complementaria.

Se concluye que los fundamentos de la apelación planteados por el Ministerio de Educación Nacional, sólo prosperan parcialmente ya que no es viable incluir los Proyectos Ambientales Escolares como cátedra obligatoria dado su carácter transversal, lo cual no implica desconocer la necesidad de fortalecerlos e implementarlos como eje fundamental del Proyecto Educativo Institucional.

## **2. APELACIÓN DEL MINISTERIO DE AGRICULTURA Y DESARROLLO RURAL.**

Problemas jurídicos a resolver:

### **1.- Es viable declarar responsable por omisión en el control de vertimientos de aguas residuales al Ministerio de Agricultura y Desarrollo Rural?**

- Solicita el apelante revocar el numeral 1º de la parte resolutive de la sentencia de 25 de agosto de 2004, en lo atinente a la responsabilidad endilgada por omisión en el control de vertimientos de aguas residuales y el numeral 1º de la sentencia complementaria de 16 de septiembre de 2004, que dispuso en su contra la condena en costas y en consecuencia, se le excluya de cualquier condena que se profiera en el proceso.

Expediente No. 25000-23-27-000-2001-0479-01  
Acumulados Nos. 2000-0428, 2001-0122, 2001-0343  
Actor: GUSTAVO MOYA ÁNGEL Y OTROS  
Acción Popular

La Sala considera que de conformidad con lo establecido en la Ley 99 de 1993, que creó el Ministerio del Medio Ambiente (hoy Ministerio de Ambiente y Desarrollo Sostenible), se reordenó el Sector Público encargado de la gestión y conservación del medio ambiente y los recursos naturales renovables, se organizó el Sistema Nacional Ambiental (SINA) y se dictaron otras disposiciones.

El artículo 2° de la citada ley, dispuso que el Ministerio de Ambiente es el organismo rector de la gestión del medio ambiente y de los recursos naturales renovables, encargado de definir las políticas y regulaciones a las que se sujetarán la recuperación, conservación, protección, ordenamiento, manejo, uso y aprovechamiento de los recursos naturales renovables y el medio ambiente de la Nación, a fin de asegurar el desarrollo sostenible.

El parágrafo 2° del artículo 5° de la citada ley, dispone que corresponde al Ministerio ejercer las demás funciones que en materia de protección del medio ambiente y los recursos naturales renovables, venían desempeñando el Instituto Nacional de los Recursos Naturales Renovables y del Ambiente (INDERENA), el Ministerio de Agricultura (hoy ministerio de Agricultura y Desarrollo Rural), el Ministerio de Salud, el Ministerio de Minas y Energía y el Departamento Nacional de Planeación.

Según lo prevé el artículo 30 de la citada ley, las Corporaciones Autónomas Regionales tendrán por objeto la ejecución de las políticas, planes, programas y proyectos sobre medio ambiente y recursos naturales renovables, así

Expediente No. 25000-23-27-000-2001-0479-01  
Acumulados Nos. 2000-0428, 2001-0122, 2001-0343  
Actor: GUSTAVO MOYA ÁNGEL Y OTROS  
Acción Popular

como dar cumplida y oportuna aplicación a las disposiciones legales vigentes sobre su disposición, administración, manejo y aprovechamiento, conforme a las regulaciones, pautas y directrices expedidas por el Ministerio.

Por su parte, los numerales 10 y 12 del artículo 31 de la ley 99 de 1993, disponen que compete a las corporaciones autónomas regionales, fijar en el área de su jurisdicción, los límites permisibles de descarga, transporte o depósito de sustancias, productos, compuestos o cualquier otra materia que puedan afectar el ambiente o los recursos naturales renovables y prohibir, restringir o regular la fabricación, distribución, uso, disposición o vertimiento de sustancias causantes de degradación ambiental. Estos límites, restricciones y regulaciones en ningún caso podrán ser menos estrictos que los definidos por el Ministerio del Medio Ambiente (hoy Ministerio de Ambiente y Desarrollo Sostenible); y ejercer las funciones de evaluación, control y seguimiento ambiental de los usos del agua y el suelo, lo cual comprenderá el vertimiento o incorporación de sustancias o residuos líquidos, sólidos y gaseosos, a las aguas en cualquiera de sus formas o a los suelos. Estas funciones comprenden la expedición de las respectivas licencias ambientales, permisos y concesiones.

Además, las autoridades ambientales de los grandes centros urbanos de que trata el artículo 66 de la Ley 99 de 1993 y los establecimientos públicos a los que se refiere el artículo 13 de la Ley 768 de 2002, cumplen las mismas funciones que las corporaciones autónomas regionales en el área de su jurisdicción.

Expediente No. 25000-23-27-000-2001-0479-01  
Acumulados Nos. 2000-0428, 2001-0122, 2001-0343  
Actor: GUSTAVO MOYA ÁNGEL Y OTROS  
Acción Popular

Dentro de esta normativa, no corresponde al Ministerio de Agricultura ejercer vigilancia sobre los vertimientos ni tampoco imponer sanciones a los infractores, lo que significa que asiste razón al impugnante en cuanto a que su responsabilidad no puede predicarse de unas competencias de las cuales carece.

***2.- Tiene competencia el Ministerio de Agricultura y Desarrollo Rural para ejercer control en la zona de ronda del río Bogotá y sancionar a los propietarios de los predios por no cercar sus linderos?***

- Solicita el Ministerio De Agricultura y Desarrollo Rural modificar el numeral 3º, literal f) de la sentencia, en cuanto le ordenó ejercer control en la zona de ronda del río Bogotá y sancionar a los propietarios de los predios que no cerquen sus linderos para impedir el paso del ganado hacia las fuentes hídricas, por considerar que no es función de la entidad.

En primer término el impugnante pone de presente que la falta de una política coordinada sobre los asentamientos humanos en el Distrito Capital, originada entre otros factores por la violencia de los grupos armados, no fue objeto de las demandas, sin embargo esta Sala considera que como lo que se pretende en la presente acción popular es amparar los derechos colectivos de los habitantes de la Cuenca Hidrográfica del río Bogotá, únicamente podrá abordarse el problema sobre la base de una solución integral no sólo para su recuperación, sino también para su sostenibilidad, razón por la cual habrá que tener en cuenta todas las circunstancias que han contribuido o

Expediente No. 25000-23-27-000-2001-0479-01  
Acumulados Nos. 2000-0428, 2001-0122, 2001-0343  
Actor: GUSTAVO MOYA ÁNGEL Y OTROS  
Acción Popular

contribuyen con la afectación de la Cuenca del río Bogotá y sus afluentes, incluidos los asentamientos irregulares en la ronda del río, con desconocimiento de las normas que regulan la materia y que compete entre otras autoridades al Ministerio de Agricultura, ya que a éste le corresponde formular las políticas relacionadas con el sector rural, como lo prevé el Decreto 1985 de 2013, que modificó la estructura del Ministerio de Agricultura y Desarrollo Rural, al señalar:

"ARTÍCULO 2o. *OBJETIVOS*. El Ministerio de Agricultura y Desarrollo Rural le compete dentro del marco de sus competencias desarrollar los siguientes objetivos:

- Promover el desarrollo rural con enfoque territorial y el fortalecimiento de la productividad y competitividad de los productos agropecuarios, a través de acciones integrales que mejoren las condiciones de vida de los pobladores rurales, permitan el aprovechamiento sustentable de los recursos naturales, generen empleo y logren el crecimiento sostenido y equilibrado de las regiones.
- Propiciar la articulación de las acciones institucionales en el medio rural de manera focalizada y sistemática, bajo principios de competitividad, equidad, sostenibilidad, multisectorialidad y descentralización, para el desarrollo socioeconómico del país.

Los anteriores objetivos se desarrollarán a través de la institucionalidad que comprende el Sector Administrativo Agropecuario, Pesquero y de Desarrollo Rural".

En desarrollo de estos objetivos, estableció las funciones del Ministerio de Agricultura y Desarrollo Rural en el artículo 3º al señalarle, entre otras, las de formular las políticas del sector rural en el ámbito de su competencia; formular, dirigir, coordinar y evaluar la política relacionada con el desarrollo rural,

Expediente No. 25000-23-27-000-2001-0479-01  
Acumulados Nos. 2000-0428, 2001-0122, 2001-0343  
Actor: GUSTAVO MOYA ÁNGEL Y OTROS  
Acción Popular

agropecuario, pesquero y forestal en los temas de su competencia; fortalecer los procesos de participación ciudadana y planificación del territorio, bajo los lineamientos de la política macroeconómica; formular acciones para propiciar la articulación interinstitucional de las entidades del orden nacional y territorial que conlleven a la implementación de planes, programas y proyectos de desarrollo rural, y agropecuario con enfoque territorial; formular, coordinar, adoptar y hacer seguimiento a la política de desarrollo rural con enfoque territorial, en lo relacionado con el ordenamiento social de la propiedad rural y uso productivo del suelo, capacidades productivas y generación de ingresos, y gestión de bienes públicos rurales; formular y hacer seguimiento a la política agropecuaria, pesquera y de desarrollo rural para la atención de la población en situación de vulnerabilidad con el objetivo de contribuir a la materialización de sus derechos con enfoque integral y diferencial, en coordinación con las demás entidades competentes del Estado; **participar, con las autoridades competentes, en la formulación y adopción de la política de aprovechamiento sostenible de los recursos naturales renovables y los recursos hídricos.**

En este contexto no hay lugar a revocar el numeral 1º de la parte resolutive de la sentencia de 25 de agosto de 2004, en lo atinente a la responsabilidad endilgada por omisión al Ministerio de Agricultura y Desarrollo Rural, pues éste debe asumir los roles que en materia de políticas públicas le atañen para evitar los asentamientos ilegales en la ronda del río Bogotá, en

Expediente No. 25000-23-27-000-2001-0479-01  
Acumulados Nos. 2000-0428, 2001-0122, 2001-0343  
Actor: GUSTAVO MOYA ÁNGEL Y OTROS  
Acción Popular

coordinación con las demás autoridades a las cuales les compete de manera articulada esta tarea.

Únicamente procede modificar el numeral 3º, literal f) de la parte resolutive de la sentencia de primera instancia en cuanto ordenó al Ministerio de Agricultura y Desarrollo Rural, imponer sanciones por carecer de competencia para ello; habrá lugar sí a recabar sobre los mecanismos que deben adoptarse para evitar los asentamientos humanos en las zonas de ronda, y adoptar las medidas a que haya lugar dentro de los lineamientos de las políticas que compete formular al Ministerio de Agricultura y Desarrollo Rural.

3.- Procede condenar en costas al Ministerio de Agricultura y Desarrollo Rural?

La Sala ha precisado que la condena en costas procede en las acciones populares del artículo 38 de la Ley 472 que a la letra dice:

"El juez aplicará las normas de Procedimiento Civil relativas a las costas. Solo podrá condenar al demandante a sufragar los honorarios, gastos y costos ocasionados al demandado, cuando la acción presentada sea temeraria o de mala fe. En caso de mala fe de cualquiera de las partes el juez podrá imponer una multa hasta de veinte (20) salarios mínimos mensuales, los cuales serán destinados al Fondo para la Defensa de los Derechos e Intereses Colectivos, sin perjuicio de las demás acciones a que haya lugar."

Los artículos 392 y 393 del Código de Procedimiento Civil, modificados por los artículos 42 y 43 de la Ley 794 de 2003 preceptúan:

Expediente No. 25000-23-27-000-2001-0479-01  
Acumulados Nos. 2000-0428, 2001-0122, 2001-0343  
Actor: GUSTAVO MOYA ÁNGEL Y OTROS  
Acción Popular

"Artículo 392.- En los procesos y en las actuaciones posteriores a aquellos en que haya controversia, la condenación en costas se sujetará a las siguientes reglas:

1. **Se condenará en costas a la parte vencida en el proceso, o a quien se le resuelva desfavorablemente el recurso de apelación, casación o revisión que haya propuesto. Además, en los casos especiales previstos en este código.**
2. **La condena se hará en sentencia; cuando se trate de auto que sin poner fin al proceso resuelva el incidente o los trámites especiales que lo sustituyen, señalados en el numeral 4º del artículo 351, el recurso y la oposición, la condena se impondrá cuando sea manifiesta la carencia de fundamento legal o cuando a sabiendas se aleguen hechos contrarios a la realidad.**
3. **En la sentencia de segundo grado que confirme en todas sus partes la del inferior, se condenará al recurrente en las costas de la segunda instancia.**
4. Cuando la sentencia de segundo grado revoque totalmente la del inferior, la parte vencida será condenada a pagar las costas de ambas instancias.
5. Cuando se trate del recurso de apelación de un auto que no ponga fin al proceso, no habrá costas en segunda instancia.
6. En caso de que prospere parcialmente la demanda, el juez podrá abstenerse de condenar en costas o pronunciar condena parcial, expresando los fundamentos de su decisión.
7. Cuando fueren dos o más litigantes que deban pagar las costas, el juez los condenará en proporción a su interés en el proceso; si nada se dispone al respecto, se entenderán distribuidas por partes iguales entre ellos.

Expediente No. 25000-23-27-000-2001-0479-01  
Acumulados Nos. 2000-0428, 2001-0122, 2001-0343  
Actor: GUSTAVO MOYA ÁNGEL Y OTROS  
Acción Popular

8. Si fueren varios los litigantes favorecidos con la condena en costas, a cada uno de ellos **se les reconocerán los gastos que hubieren sufragado** y se harán por separado las liquidaciones.

9. **Sólo habrá lugar a costas cuando en el expediente aparezca que se causaron y en la medida de su comprobación.**

10. Las estipulaciones de las partes en materia de costas se tendrán por no escritas. Sin embargo podrán renunciarse después de decretadas y en los casos de desistimiento o transacción." (Resalta la Sala)

En sentencia de 10 de mayo de 2007, con ponencia del Magistrado doctor Gabriel Eduardo Mendoza Martelo, proferida dentro del expediente radicado bajo el núm. 2003-01653, la Sala Consideró lo siguiente:

"Ahora bien, como el actor se adhiere a la apelación del Municipio de Bucaramanga para que se revoque la negación de la condena en costas que hizo el a-quo, y en su lugar se conceda, cabe recordar que éstas constituyen la erogación económica que debe efectuar la parte vencida en un proceso judicial, y están conformadas tanto por las expensas como por las agencias en derecho. Las primeras corresponden a los gastos surgidos con ocasión del proceso y necesarios para su desarrollo, pero distintas al pago de apoderado y que, según el artículo 393, numeral 2º, del Código de Procedimiento Civil, son los impuestos de timbre, los honorarios de los auxiliares de la justicia, y hace referencia general a todos los gastos surgidos en el curso de aquel. Por su parte, las agencias en derecho no son otra cosa que la compensación por los gastos de apoderamiento en que incurrió la parte vencedora que pueden fijarse sin que necesariamente hubiere mediado la intervención directa de un profesional del derecho.

En las acciones populares, conforme a lo dispuesto en el artículo 38 de la Ley 472 de

Expediente No. 25000-23-27-000-2001-0479-01  
Acumulados Nos. 2000-0428, 2001-0122, 2001-0343  
Actor: GUSTAVO MOYA ÁNGEL Y OTROS  
Acción Popular

1998, es menester precisar que el juez aplicará las normas de procedimiento civil relativas a las costas, y que en tratándose del demandante solo podrá condenarse a sufragar los honorarios, gastos y costos ocasionados al demandado, cuando la acción presentada sea temeraria o de mala fe."

En relación con las agencias en derecho, el Consejo Superior de la Judicatura estableció las tarifas mediante el Acuerdo núm. 1887 de 26 de junio de 2003, el cual definió las agencias en derecho en su artículo 2º de la siguiente manera:

"Se entiende por agencias en derecho la porción de las costas imputables a los gastos de defensa judicial de la parte victoriosa, a cargo de quien pierda el proceso, el incidente o trámite especial por él promovido, y de quien se le resuelva desfavorablemente el recurso de apelación, casación, revisión o anulación que haya propuesto, y en los casos especiales previstos en los códigos de procedimiento.

Por su parte, el artículo 3º dispuso que el funcionario judicial, para la aplicación de las tarifas, debe tener en cuenta la naturaleza, calidad y duración útil de la gestión realizada, ya sea por el apoderado o por la parte que litigó personalmente y, todas aquellas circunstancias relevantes.<sup>221</sup>

---

<sup>221</sup> Acuerdo 1887 de 2003. Artículo 3º. Criterios. El funcionario judicial, para aplicar gradualmente las tarifas establecidas hasta los máximos previstos en este acuerdo, tendrá en cuenta la naturaleza, calidad y duración útil de la gestión ejecutada por el apoderado o la parte que litigó personalmente, autorizada por la ley, la cuantía de la pretensión y las demás circunstancias relevantes, de modo que sean equitativas y razonables. Las tarifas por porcentaje se aplicarán inversamente al valor de las pretensiones.

Expediente No. 25000-23-27-000-2001-0479-01  
Acumulados Nos. 2000-0428, 2001-0122, 2001-0343  
Actor: GUSTAVO MOYA ÁNGEL Y OTROS  
Acción Popular

El numeral 3.2 del artículo 6° señaló como tarifa máxima para las acciones populares y de grupo tramitadas en la Jurisdicción Contencioso Administrativa, en primera instancia hasta 4 salarios mínimos mensuales legales vigentes y en segunda instancia hasta un salario mínimo mensual legal vigente.

Pese a que el accionante no actuó por intermedio de apoderado, se comprobó que su actuación fue determinante para la protección de los derechos colectivos vulnerados, e intervino durante todo el curso del proceso<sup>222</sup>.

Al respecto cabe anotar que en las acciones populares procede la condena en costas siempre y cuando se encuentren acreditados los supuestos exigidos en el código de procedimiento civil. Como se encuentran dados los supuestos establecidos habrá lugar a confirmar el artículo 1° de la sentencia complementaria.

### **3. APELACIÓN DEL MINISTERIO DE AMBIENTE, VIVIENDA Y DESARROLLO TERRITORIAL.**

El apoderado judicial sustentó el recurso de apelación y como motivos de inconformidad con la sentencia de primera instancia planteó los siguientes:

Solicita en primer término el Ministerio, se revoque el numeral primero de la parte resolutive de la sentencia en cuanto el Ministerio carece de competencia para ejercer el control sobre los vertimientos de aguas residuales

---

<sup>222</sup> CONSEJO DE ESTADO, SALA DE LO CONTENCIOSO ADMINISTRATIVO, SECCION PRIMERA, Consejera ponente: MARIA ELIZABETH GARCIA GONZALEZ, Bogotá, D. C., once (11) de agosto de dos mil once (2011), Radicación número: 85001-23-31-000-2010-00131-01(AP), Actor: SEBASTIAN CAMILO MESA HERNANDEZ, Demandado: SUPERINTENDENCIA DE NOTARIADO Y REGISTRO.

Expediente No. 25000-23-27-000-2001-0479-01  
Acumulados Nos. 2000-0428, 2001-0122, 2001-0343  
Actor: GUSTAVO MOYA ÁNGEL Y OTROS  
Acción Popular

pues a él le compete solamente la fijación de las políticas generales sobre la materia, no así ejercer el control puesto que esta función corresponde a la CAR y a las entidades municipales.

En estos términos el problema jurídico que se plantea en primer lugar es si el Ministerio de Ambiente, Vivienda y Desarrollo Territorial tiene competencia para ejercer el control sobre los vertimientos de aguas residuales.

La competencia del Ministerio de Ambiente, Vivienda y desarrollo territorial vigente para la época en que se profirió la sentencia estaba contemplada en la Ley 99 de 1993, artículo 5º, que en el numeral 25 prevé:

**25) Establecer los límites máximos permisibles de emisión, descarga, transporte o depósito de sustancias, productos, compuestos o cualquier otra materia que pueda afectar el medio ambiente o los recursos naturales renovables; del mismo modo, prohibir, restringir o regular la fabricación, distribución, uso, disposición o vertimiento de sustancias causantes de degradación ambiental.** Los límites máximos se establecerán con base en estudios técnicos, sin perjuicio del principio de precaución;  
**35) Hacer evaluación, seguimiento y control de los factores de riesgo ecológico y de los que puedan, incidir en la ocurrencia de desastres naturales y coordinar con las demás autoridades las acciones tendientes a prevenir la emergencia o a impedir la extensión de sus efectos;**

El Decreto 3930 de 2010, modificado por el Decreto 4728 de 2010 *Por el cual se reglamenta parcialmente el Título I de la Ley 9ª de 1979, así como el Capítulo II del Título VI -Parte III- Libro II del Decreto-ley 2811 de 1974 en cuanto a usos del agua y residuos líquidos y se*

Expediente No. 25000-23-27-000-2001-0479-01  
Acumulados Nos. 2000-0428, 2001-0122, 2001-0343  
Actor: GUSTAVO MOYA ÁNGEL Y OTROS  
Acción Popular

*dictan otras disposiciones, establece en el artículo 28 y siguientes:*

Artículo 1º. El artículo 28 del Decreto 3930 de 2010 quedará así:

"Artículo 28. Fijación de la norma de vertimiento. El Ministerio de Ambiente, Vivienda y Desarrollo Territorial fijará los parámetros y los límites máximos permisibles de los vertimientos a las aguas superficiales, marinas, a los sistemas de alcantarillado público y al suelo.

El Ministerio de Ambiente Vivienda y Desarrollo Territorial dentro de los diez (10) meses, contados a partir de la fecha de publicación de este decreto, expedirá las normas de vertimientos puntuales a aguas superficiales y a los sistemas de alcantarillado público.

Igualmente, el Ministerio de Ambiente Vivienda y Desarrollo Territorial deberá establecer las normas de vertimientos al suelo y aguas marinas, dentro de los treinta y seis (36) meses, contados a partir de la fecha de publicación de este decreto".

Artículo 2º. El artículo 34 del Decreto 3930 de 2010, quedara así:

"Artículo 34. Protocolo para el Monitoreo de los Vertimientos en Aguas Superficiales y Subterráneas. El Ministerio de Ambiente, Vivienda y Desarrollo Territorial expedirá dentro de los dieciséis (16) meses siguientes, contados a partir de la publicación del presente decreto, el Protocolo para el Monitoreo de los Vertimientos en Aguas Superficiales y Subterráneas, en el cual se establecerán, entre otros aspectos: el punto de control, la infraestructura técnica mínima requerida, la metodología para la toma de muestras y los métodos de análisis para los parámetros a determinar en vertimientos y en los cuerpos de agua o sistemas receptores.

Parágrafo. Mientras el Ministerio de Ambiente, Vivienda y Desarrollo Territorial adopta el Protocolo para el Monitoreo de los Vertimientos en Aguas Superficiales y Subterráneas, se seguirán los

Expediente No. 25000-23-27-000-2001-0479-01  
Acumulados Nos. 2000-0428, 2001-0122, 2001-0343  
Actor: GUSTAVO MOYA ÁNGEL Y OTROS  
Acción Popular

procedimientos establecidos en la Guía para el Monitoreo de Vertimientos, Aguas Superficiales y Subterráneas del Instituto de Hidrología, Meteorología y Estudios Ambientales - Ideam".

La Ley 99 de 1993, otorga a las autoridades ambientales Regionales, **en su calidad de máxima autoridad ambiental en el área de su jurisdicción, la facultad de ejercer las funciones de evaluación, control y seguimiento ambiental del uso del agua,** el suelo, el aire y los demás recursos naturales renovables, las cuales comprenderán el vertimiento, emisión o incorporación de sustancias o residuos líquidos, sólidos o gaseosos, en cualquiera de sus formas, a las aguas en cualquiera de sus formas, al aire, o a los suelos, así como los vertimientos que puedan causar daño o poner en peligro el normal desarrollo sostenible de los recursos naturales renovables o impedir u obstaculizar su empleo para otros usos. Entre otras disposiciones, encarga a los municipios la función específica de ejecutar obras o proyectos de descontaminación de corrientes o depósitos de agua afectados por los vertimientos municipales. Además, crea la tasa retributiva por vertimientos líquidos puntuales a los cuerpos de agua y establece los lineamientos para su implementación.

Según lo dispuesto en los numerales 10 y 12 del artículo 31 de la citada ley, le compete a las corporaciones autónomas regionales, fijar en el área de su jurisdicción, los límites permisibles de descarga, transporte o depósito de sustancias, productos, compuestos o cualquier otra materia que puedan afectar el ambiente o los recursos naturales renovables y prohibir, restringir o regular la fabricación, distribución, uso,

Expediente No. 25000-23-27-000-2001-0479-01  
Acumulados Nos. 2000-0428, 2001-0122, 2001-0343  
Actor: GUSTAVO MOYA ÁNGEL Y OTROS  
Acción Popular

disposición o vertimiento de sustancias causantes de degradación ambiental. Estos límites restricciones y regulaciones en ningún caso podrán ser menos estrictos que los definidos por el Ministerio del Medio Ambiente (hoy Ministerio de Ambiente y Desarrollo Sostenible); y ejercer las funciones de evaluación, control y seguimiento ambiental de los usos del agua y el suelo, lo cual comprenderá el vertimiento o incorporación de sustancias o residuos líquidos, sólidos y gaseosos, a las aguas en cualquiera de sus formas o a los suelos. Estas funciones comprenden la expedición de las respectivas licencias ambientales, permisos y concesiones.

Lo que significa que corresponde en materia de vertimientos de aguas residuales al Ministerio de Ambiente y Desarrollo Sostenible la función regulativa y a las autoridades ambientales la función de control, razón por la cual el cargo debe prosperar.

**2.- Compete al Ministerio de Ambiente, Vivienda y Desarrollo Territorial delimitar geográficamente las zonas excluidas de la minería?**

Solicita el apelante revocar el artículo 3º, literal b) de la sentencia, en cuanto decidió que en el término máximo de tres (3) meses el Ministerio de Ambiente debía proceder a la delimitación geográfica de las zonas excluidas de la minería.

La sentencia dispuso en el numeral tercero de la parte resolutive:

**TERCERO:** Como consecuencia, para restituir las cosas a su estado anterior, esto es, para lograr la

Expediente No. 25000-23-27-000-2001-0479-01  
Acumulados Nos. 2000-0428, 2001-0122, 2001-0343  
Actor: GUSTAVO MOYA ÁNGEL Y OTROS  
Acción Popular

descontaminación del RÍO BOGOTÁ y SUS AFLUENTES de que dan cuenta las pretensiones y del EMBALSE DEL MUÑA, deberán observarse también las siguientes directrices respecto de la ejecución de las obras que en los pactos de cumplimiento se mencionan, en orden de prioridad: (...) **b)** De conformidad con la función que el artículo 5 de la Ley 99 de 1993 le adscribe al MAVDT, en el término máximo de tres (3) meses contados a partir de la notificación de esta sentencia, éste debe proceder a delimitar geográficamente en forma clara cuáles son las **zonas excluidas de la minería**, esto es, dónde no podrán ejecutarse trabajos y obras de exploración y explotación minera, según la previsión del artículo 34 de la Ley 685 de 2001 o "Código de Minas" y bajo las directrices señaladas por la Corte Constitucional en la sentencia C-339 de 2002. Para tal efecto, la autoridad minera (que es la que se define y señala en el art. 317 de la citada ley, en principio el Ministerio de Minas y Energía) tiene el deber de colaboración, el cual no limita ni condiciona el ejercicio de la competencia de la autoridad ambiental quien es la que debe establecer tales zonas;

El artículo 34 de la Ley 685 de 2001 le asigna competencia al Ministerio de Ambiente para delimitar las zonas excluidas de la minería:

Artículo 34. Zonas excluibles de la minería. No podrán ejecutarse trabajos y obras de exploración y explotación mineras en zonas declaradas y delimitadas conforme a la normatividad vigente como de protección y desarrollo de los recursos naturales renovables o del ambiente y que, de acuerdo con las disposiciones legales sobre la materia, expresamente excluyan dichos trabajos y obras.

Las zonas de exclusión mencionadas serán las que se constituyan conforme a las disposiciones vigentes, como áreas que integran el sistema de parques nacionales naturales, parques naturales de carácter regional y zonas de reserva forestales. Estas zonas para producir estos efectos, deberán ser delimitadas geográficamente por la autoridad ambiental con base en estudios técnicos, sociales y ambientales con la

Expediente No. 25000-23-27-000-2001-0479-01  
 Acumulados Nos. 2000-0428, 2001-0122, 2001-0343  
 Actor: GUSTAVO MOYA ÁNGEL Y OTROS  
 Acción Popular

colaboración de la autoridad minera, en aquellas  
 áreas de interés minero.

(...)

El Ministerio de Ambiente expidió la Resolución 813 de 2004 que fue sustituida posteriormente por la Resolución 1197 de 2004, acto administrativo respecto del cual esta Sección se pronunció sobre su legalidad en sentencia de 2 de junio de 2011<sup>223</sup>, al considerar que el Ministerio de Ambiente es competente para regular las zonas excluidas de la minería.

Dicha normatividad debe expedirse en coordinación con el Ministerio de Minas y Energía acorde con las normas previstas en el Código de Minas y demás disposiciones concordantes, como también lo precisó la Corte Constitucional en sentencia C-339 de 2002, en la cual declaró la constitucionalidad condicionada del inciso segundo de esta disposición por considerar que:

"El inciso segundo señala que las zonas de exclusión se encuentran integradas por las siguientes áreas: a) el sistema de parques nacionales naturales, b) los parques naturales de carácter regional y, c) las zonas de reserva forestal. Con lo anterior se pretende la protección de la biodiversidad, de acuerdo con la gran importancia de Colombia a nivel mundial como lo reconoció la Corte cuando analizó el tema(13). La Corte precisa que además de las zonas de exclusión previstas en esta Ley, pueden existir otras, ya declaradas con anterioridad o que se declaren en el futuro por la autoridad ambiental.

(...)

---

<sup>223</sup> CONSEJO DE ESTADO, SALA DE LO CONTENCIOSO ADMINISTRATIVO, SECCION PRIMERA, Consejera ponente: MARIA ELIZABETH GARCIA GONZALEZ, Bogotá, D.C., dos (2) de junio de dos mil once (2011), Radicación número: 11001-03-24-000-2005-00167-01.

Expediente No. 25000-23-27-000-2001-0479-01  
 Acumulados Nos. 2000-0428, 2001-0122, 2001-0343  
 Actor: GUSTAVO MOYA ÁNGEL Y OTROS  
 Acción Popular

"Naturalmente las zonas excluidas deben ser claramente delimitadas geográficamente y **esta función se le asigna a la autoridad ambiental en integración y armonía con lo preceptuado por el artículo 5 de la ley 99 de 1993.** Además incluye la colaboración de la autoridad minera en las áreas de interés minero, con lo cual se hace efectivo el principio de protección prioritaria de la biodiversidad del país junto con un aprovechamiento en forma sostenible, de acuerdo con lo principios universales y de desarrollo sostenible contenidos en la Declaración de Río de Janeiro de junio de 1992, ratificada por Colombia".

"Se hace necesario para la Corte señalar que la autoridad minera tiene el deber de colaborar con la autoridad ambiental, pero que este deber de colaboración no limita ni condiciona el ejercicio de la competencia de la autoridad ambiental quien es la que puede establecer las zonas de exclusión; por esta razón en la parte resolutive se condicionará la exequibilidad del inciso segundo del artículo 34 de la ley 685 de 2001".

En este sentido las autoridades competentes, esto es los Ministerios de Ambiente y Minas, aún no han expedido la resolución que defina las zonas excluidas de la Minería, ya que la Resolución 1197 de 2004 fue declarada parcialmente nula por el Consejo de Estado por considerar que al no haberse contado con el concepto técnico del Ministerio de Minas y Energía, el acto se encontraba viciado de nulidad, así lo sostuvo en la sentencia<sup>224</sup> al precisar:

"Se trata, como toda atribución administrativa, de una competencia reglada que impone una serie de condiciones para que pueda ser aplicada:

---

<sup>224</sup> CONSEJO DE ESTADO, SECCIÓN TERCERA, Consejera Ponente: RUTH STELLA CORREA PALACIO, Bogotá, D.C., veintitrés (23) de junio de dos mil diez (2010), Radicación número: 110010326000200500041 00 (30987).

Expediente No. 25000-23-27-000-2001-0479-01  
Acumulados Nos. 2000-0428, 2001-0122, 2001-0343  
Actor: GUSTAVO MOYA ÁNGEL Y OTROS  
Acción Popular

(i) La delimitación geográfica debe adelantarse con base en estudios técnicos, sociales y ambientales (exigencia de experticia fundamental).

(ii) Esos estudios técnicos, sociales y ambientales deben llevarse a cabo con la colaboración de la autoridad minera (principio de coordinación y colaboración administrativa)

(iii) El acto administrativo que contiene la decisión de exclusión o restricción de trabajos y obras de exploración y explotación mineras en las zonas de protección y desarrollo de los recursos naturales renovables o del ambiente, debe estar expresamente motivado en estudios que determinen la incompatibilidad o restricción en relación con las actividades mineras (deber de motivación en la experticia)".

Y en estos términos concluye:

De manera que con arreglo al referido pronunciamiento de constitucionalidad modulada:

(i) La autoridad minera tiene el deber de colaborar con la autoridad ambiental (principio de coordinación y colaboración administrativa).

(ii) Ese deber de colaboración no limita ni condiciona el ejercicio de la competencia de la autoridad ambiental.

(iii) En la autoridad ambiental está radicada la atribución de establecer las zonas de exclusión (competencia *ratione materiae*).

Como esta regulación no ha sido expedida aún resulta imperioso que en el menor tiempo posible el Ministerio de Ambiente y Desarrollo Sostenible expida el correspondiente acto administrativo con la colaboración del Ministerio de Minas y Energía.

Como de una parte la autoridad ambiental expide las licencias ambientales y define las áreas permitidas para

Expediente No. 25000-23-27-000-2001-0479-01  
 Acumulados Nos. 2000-0428, 2001-0122, 2001-0343  
 Actor: GUSTAVO MOYA ÁNGEL Y OTROS  
 Acción Popular

la explotación minera y de otra, el Ministerio de Minas otorga las concesiones para su explotación, es indispensable que las dos autoridades, previo consenso, expidan la correspondiente regulación. Como hasta la fecha esta resolución no ha sido expedida, la ausencia de regulación, es razón suficiente para confirmar la sentencia en este aspecto.

El cargo en estas circunstancias no prospera.

**3.- ¿Compete al Ministerio de Ambiente, vivienda y Desarrollo Territorial otorgar los títulos permisos, concesiones y licencias de exploración minera?**

Solicita el Ministerio revocar el artículo 3º, literal c, de la sentencia de primera instancia teniendo en cuenta que lo relacionado con los títulos, permisos, concesiones y licencias de exploraciones mineras no es competencia de la entidad, sino del Ministerio de Minas y Energía, mencionó que sólo le corresponde lo relacionado con las licencias ambientales pero para la gran minería.

**Competencia para expedir títulos, permisos, concesiones y licencias de exploraciones mineras.**

La **Licencia Ambiental** de los proyectos de minería, como la exploración, explotación, producción, almacenamiento, acopio y transporte será otorgada por el Ministerio del Medio Ambiente y las Corporaciones Autónomas Regionales (CAR) de acuerdo con la producción esperada<sup>225</sup>. Luego la

---

<sup>225</sup> El Decreto 2820 de 2010 distribuye las competencias en esta materia. Artículos 2º, 8º y 9º.

Expediente No. 25000-23-27-000-2001-0479-01  
 Acumulados Nos. 2000-0428, 2001-0122, 2001-0343  
 Actor: GUSTAVO MOYA ÁNGEL Y OTROS  
 Acción Popular

competencia no está definida de manera expresa a las Corporaciones Autónomas Regionales como lo advierte el Ministerio.

El Tribunal resolvió en el numeral tercero literal c):

"c) Igualmente, en el término máximo de seis (6) meses contados a partir del vencimiento del plazo fijado en el literal b), el MAVDT con la intervención y colaboración del MINISTERIO DE MINAS Y ENERGÍA debe proceder en consecuencia a revocar y suspender los títulos, permisos, concesiones y licencias de las exploraciones mineras en las zonas de exclusión;"

---

"Artículo 2°. Artículo 2°. Autoridades ambientales competentes. Son autoridades competentes para otorgar o negar licencia ambiental conforme a la ley y al presente Decreto, las siguientes:

1. El Ministerio de Ambiente, Vivienda y Desarrollo Territorial.
2. Las Corporaciones Autónomas Regionales y las de Desarrollo Sostenible.
3. Los municipios, distritos y áreas metropolitanas cuya población urbana sea superior a un millón de habitantes dentro de su perímetro urbano.

4. Las autoridades ambientales creadas mediante la Ley 768 de 2002. Las Corporaciones Autónomas Regionales y las de Desarrollo Sostenible podrán delegar el ejercicio de esta competencia en las entidades territoriales, para lo cual deberán tener en cuenta especialmente la capacidad técnica, económica, administrativa y operativa de tales entidades para ejercer las funciones delegadas.

"Artículo 8° Competencia del Ministerio de Ambiente, Vivienda y Desarrollo Territorial. El Ministerio de Ambiente, Vivienda y Desarrollo Territorial, otorgará o negará de manera privativa la licencia ambiental para los siguientes proyectos, obras o actividades: (...)2. En el sector minero: La explotación minera de: (...)

**b) Materiales de construcción y arcillas o minerales industriales no metálicos:** Cuando la producción proyectada sea mayor o igual a 600.000 ton/año para las arcillas o mayor o igual a 250.000 m3/año para otros materiales de construcción o para minerales industriales no metálicos;

"Artículo 9°. Competencia de las Corporaciones Autónomas Regionales. Las Corporaciones Autónomas Regionales, las de Desarrollo Sostenible, los Grandes Centros Urbanos y las autoridades ambientales creadas mediante la Ley 768 de 2002, otorgarán o negarán la licencia ambiental para los siguientes proyectos, obras o actividades, que se ejecuten en el área de su jurisdicción. 1. En el sector minero: (...)b) Materiales de construcción y arcillas o minerales industriales no metálicos: Cuando la producción proyectada de mineral sea menor a 600.000 ton/año para arcillas o menor a 250.000 m3/año para otros materiales de construcción o para minerales industriales no metálicos.

Expediente No. 25000-23-27-000-2001-0479-01  
Acumulados Nos. 2000-0428, 2001-0122, 2001-0343  
Actor: GUSTAVO MOYA ÁNGEL Y OTROS  
Acción Popular

Asiste razón al Ministerio impugnante en cuanto el término perentorio para efecto de revisar los permisos y autorizaciones otorgados por el Ministerio resultaba insuficiente, sin embargo, hoy ya debe contarse con dicha evaluación, así como con la información debidamente sistematizada, cancelado los permisos o autorizaciones otorgados en zonas de exclusión y monitoreado de manera permanente los vigentes para que cumplan con las exigencias de los planes de manejo ambiental para su recuperación. La orden como se advierte por la Sala no es contraria a la competencia del Ministerio razón por la cual el cargo tampoco prospera.

***4.- ¿Tiene competencia el Ministerio de Ambiente, Vivienda y Desarrollo Territorial para cofinanciar el dragado del río Bogotá y sus afluentes?***

Solicita en este sentido el Ministerio apelante revocar la orden de cofinanciar el dragado del río Bogotá y sus afluentes, por cuanto se estarían violando las funciones y competencias del Ministerio.

La sentencia del Tribunal dispuso en el numeral 4 de la parte resolutive literal h):

h) EL DRAGADO del RÍO BOGOTÁ Y DE SUS AFLUENTES correrá con cargo a los recursos de la EAAB, de la CAR del MAVDT y del MINISTERIO DE MINAS Y Energía en la forma señalada en el punto 6.18. De la parte motiva de este fallo.

En el punto 6.18 la sentencia consideró:

6.18. DEL DRAGADO DEL RÍO Y SUS AFLUENTES correrá por cuenta de la E.A.A.B. en la franja de los ríos y en los términos y plazos que tiene presupuestado y de la CORPORACIÓN AUTÓNOMA REGIONAL DE CUNDINAMARCA CON LA

Expediente No. 25000-23-27-000-2001-0479-01  
Acumulados Nos. 2000-0428, 2001-0122, 2001-0343  
Actor: GUSTAVO MOYA ÁNGEL Y OTROS  
Acción Popular

COFINANCIACIÓN DEL MINISTERIO DE MINAS Y ENERGÍA Y DEL MEDIO AMBIENTE en el territorio de la jurisdicción donde han sido concedidas las respectivas licencias de las exploraciones mineras causantes de la erosión de las montañas y laderas, por ende de la escorrentía y de la sedimentación del RÍO Y SUS AFLUENTES, dragado del que los lodos serán depositados en el lugar que determinen las autoridades ambientales involucradas.

Hoy, de acuerdo con el Convenio 171/2007, para la Adecuación Hidráulica y Recuperación Ambiental del Río Bogotá, ampliación y optimización de la PTAR Salitre, los recursos para el dragado del río y sus afluentes están cubiertos.

Así se establece de los alegatos presentados por la CAR en los cuales precisa que las obras realizadas para la mitigación de las inundaciones a través del Fondo de Inversiones para la Adecuación del Río Bogotá (FIAB), son las obras de dragado, refuerzo de jarillones y ampliación del cauce del río Bogotá, entre Alicachín y la desembocadura del río Tunjuelo, en un tramo de 21 Kms., se removieron más de 500.000 m<sup>3</sup> de sedimentos del cauce del río y la financiación de las obras cuyo valor supera los seis mil millones de pesos corrió por cuenta de la Dirección General del Riesgo, organismo dependiente del Ministerio del Interior.

La Car asumió la supervisión técnica del proyecto, asesoría técnica y el suministro de todo el soporte requerido. Los refuerzos de los jarillones se realizaron en los puntos de alto riesgo en el municipio de Mosquera, vereda San Francisco, Soacha, Bosa y Kennedy.

Mediante el contrato 311 de 2010 se realizó limpieza del cauce y refuerzo de jarillones entre el río Balsillas y

Expediente No. 25000-23-27-000-2001-0479-01  
Acumulados Nos. 2000-0428, 2001-0122, 2001-0343  
Actor: GUSTAVO MOYA ÁNGEL Y OTROS  
Acción Popular

el Puente de San Francisco, contrato que se ejecutó con recursos propios de la CAR, por valor de \$2.177.682.801.

La CAR ha implementado bajo las normas del Banco Mundial, el proceso de consultoría y las obras de prevención en la Cuenca Media del río Bogotá en el sector comprendido entre la calle 13(K41+500)-Puente El Común (K98+200) consistentes en dragado de cauce y disposición del material extraído para el reforzamiento y reconstrucción de jarillones, perfilado de taludes y remoción y disposición de maleza acuática, árboles, ramas y tambres que se encuentren dentro del cauce, por un valor de \$9.000.000.000, obras cuya construcción concluirá en 2015 y su estabilización y entrenamiento en 2016 de conformidad con lo establecido en el Acuerdo 43 de 2006.

En este sentido asiste razón al impugnante en cuanto la competencia para el dragado del río Bogotá corresponde a la CAR y no al Ministerio de Ambiente Vivienda y Desarrollo Territorial, debiéndose revocar la sentencia en este aspecto.

**5.- Es viable el reconocimiento del incentivo y de serlo, en qué porcentaje y a quien corresponde su pago?**

Plantea el Ministerio de Ambiente, Vivienda y Desarrollo Territorial modificar el numeral 10º de la sentencia relativo al reconocimiento económico de que trata el artículo 39 de la Ley 472 de 1998, en razón a que son cinco (5) los accionantes y lo considerable sería fijar un incentivo de 150 S.M.L.M.V. repartidos entre los actores y a su vez a prorrata de todas las entidades públicas y privadas condenadas en el fallo de primera

Expediente No. 25000-23-27-000-2001-0479-01  
 Acumulados Nos. 2000-0428, 2001-0122, 2001-0343  
 Actor: GUSTAVO MOYA ÁNGEL Y OTROS  
 Acción Popular

instancia. Estima que a las entidades privadas no se les impuso la obligación de pagar incentivos, viendo claramente la inequidad en el reparto del mismo.

En cuanto hace al incentivo, se dará aplicación a la sentencia de Sala Plena de esta Corporación, que dispuso negar el incentivo en todas las acciones populares teniendo en cuenta que la disposición que lo autorizaba desapareció del ordenamiento jurídico y por lo tanto, no es posible su reconocimiento incluyendo a las acciones populares que estuviesen en curso antes de su derogatoria<sup>226</sup>.

---

<sup>226</sup> "Al Consejo de Estado no le queda el menor asomo de duda que de conformidad con lo dispuesto en la Ley 1425, de diciembre 29 de 2010, <<Por medio de la cual se derogan artículos de la Ley 472 de 1998 Acciones Populares y [de] Grupo>>, el reconocimiento judicial del incentivo económico dentro de las acciones populares fue suprimido por el Legislador del actual ordenamiento jurídico, según se determinó en forma expresa en el artículo 1º de la mencionada ley... Por virtud de la decisión del Legislador, el incentivo económico desapareció del ordenamiento jurídico y, con ello, la posibilidad legal de seguir reconociéndolo dentro de las decisiones judiciales en aquellos asuntos iniciados antes de la promulgación de la Ley 1425, al margen de si los preceptos legales que preveían tal premio a favor del actor popular correspondían, o no, a normas de naturaleza sustantiva o procesal. La Sala precisa que cualquier disquisición que en punto a la naturaleza jurídica de los artículos 39 y 40 de la Ley 472, proferida en el año 1998, antes de constituir realmente un avance en la unificación de la jurisprudencia de lo Contencioso Administrativo, se convertiría más bien en un juicio retórico innecesario, pues, como se dijo, con independencia del carácter sustancial, o no, de dichos preceptos legales, la conclusión ha de ser la misma en uno u otro caso y ello constituye, en realidad, el aspecto a unificar por parte de la Corporación... El acceso al incentivo económico dentro de aquellos procesos iniciados en ejercicio de la acción popular antes de la expedición de la Ley 1425 resulta improcedente, habida cuenta de la inexistencia de los preceptos que, con ocasión de la expedición de dicha ley, preveían el reconocimiento de tal estímulo... al haberse determinado que el estímulo económico a favor del actor popular dentro de los procesos iniciados con anterioridad a la expedición de la Ley 1425, dentro de los que se ubican -naturalmente- aquellos en los cuales se hubiere presentado la inasistencia injustificada del accionante a la audiencia de pacto de cumplimiento por parte del actor, resulta completamente claro que el incentivo no estaría llamado a reconocerse, por elemental sustracción de materia, es decir, ya no por la posible inobservancia a los deberes de parte del actor

Expediente No. 25000-23-27-000-2001-0479-01  
Acumulados Nos. 2000-0428, 2001-0122, 2001-0343  
Actor: GUSTAVO MOYA ÁNGEL Y OTROS  
Acción Popular

Cabe anotar además que el artículo 1005 del Código Civil de 1886, prescribía: "Y siempre que a consecuencia de una acción popular haya de demolerse o enmendarse una construcción, o de resarcirse un daño sufrido, se recompensará al actor, a costas del querellado, **con una suma que no baje de la décima, ni exceda de la tercera parte de lo que cueste la demolición o enmienda, o el resarcimiento del daño**". Esta norma también se aplica a la protección de los bienes de uso público y el medio ambiente por remisión expresa de la Ley 9 de 1989, Decreto 2303 de 1989.

De otra parte, la Ley 472 de 1998, en el artículo 45 dispuso: "Continuarán vigentes las acciones populares consagradas en la legislación nacional, pero **su trámite y procedimiento** se sujetarán a la presente ley".

Siendo el artículo 1005 del Código Civil, y el incentivo en él regulado, una institución de derecho sustancial, se podría concluir que la tasación del mismo seguiría vigente, sin embargo, ajeno a que se trate de un instituto de carácter sustancial o procesal la Sala Plena del Consejo de Estado en la referida sentencia consideró que en ningún evento, sea que la disposición tenga carácter sustancial o procesal procede el reconocimiento del incentivo con la expedición de la Ley 1425 de 2010, razón por la cual no habrá lugar a reconocer el incentivo en las acciones populares a partir de su entrada en vigencia.

---

popular, sino porque el mencionado instituto del incentivo dejó de existir para estos asuntos y, por obvias razones, para aquellos iniciados después de la promulgación de la Ley 1425". Sentencia de 3 de septiembre de 2013, Exp. 17001-33-31-001-2009-01566-01(AP)IJ, M.P. MAURICIO FAJARDO GÓMEZ.

Expediente No. 25000-23-27-000-2001-0479-01  
Acumulados Nos. 2000-0428, 2001-0122, 2001-0343  
Actor: GUSTAVO MOYA ÁNGEL Y OTROS  
Acción Popular

Por ello, procede revocar la sentencia de instancia en cuanto reconoció el incentivo, la cuantía y los responsables de su reconocimiento y pago.

**6.- Los denominados "Pactos de cumplimiento" tienen tal carácter y por lo tanto no son susceptibles de impugnación y sólo pueden ser revisados para ejercer control de legalidad?**

Afirma el Ministerio impugnante que los pactos de cumplimiento referidos en la sentencia de primera instancia no cumplieron con los requisitos establecidos en la Ley 472 de 1998, artículo 29, en razón a que no todos los actores asistieron a las diferentes sesiones en donde se presentaron los mismos, ni hubo un acta en la cual todos los actores y demandados firmaran la aceptación de los pactos propuestos y mucho menos hubo aprobación mediante sentencia, sino que se abrió a pruebas el proceso, se corrió traslado para alegar y ahora en el fallo, se dice aprobar los pactos propuestos por las partes.

Al respecto la Sala considera que la Ley 472 de 1998 en su artículo 27 ordena dentro del trámite de las acciones populares, la celebración de una audiencia especial con el objetivo de alcanzar en ella un acuerdo entre las partes sobre las pretensiones de la demanda, ese acuerdo lo denomina la Ley **"Pacto de Cumplimiento"**. El pacto de cumplimiento constituye uno de los mecanismos para la solución de conflictos dentro del trámite de la acción popular, que permite acercar a las partes para que éstas puedan por sí mismas, aunque con la orientación imparcial del juez, llegar a un acuerdo que finalice el litigio,

Expediente No. 25000-23-27-000-2001-0479-01  
Acumulados Nos. 2000-0428, 2001-0122, 2001-0343  
Actor: GUSTAVO MOYA ÁNGEL Y OTROS  
Acción Popular

resuelva la controversia y haga tránsito a cosa juzgada; lo cual además evita el desgaste del aparato judicial generando un ahorro para la administración de justicia y colabora con la misión superior de propiciar la paz, pues éste es ante todo un mecanismo pacífico y no litigioso de precaver los conflictos o solucionar los existentes. La Ley 472 de 1998, busca que las partes dentro de una acción popular puedan por sí mismas arreglar sus conflictos, lo cual es de una importancia mayúscula en este tipo de acciones, pues si su finalidad es la protección de los derechos e intereses colectivos, el contar con una herramienta aún más ágil que el mismo trámite de la acción popular -el cual goza de trámite preferencial, según el artículo 6 de la Ley en cita- lleva a que dicha protección se obtenga de la manera más expedita posible. (Ver sentencia C-215/99 de la Corte Constitucional).

De conformidad con el artículo 27 de la Ley 472 de 1998, la audiencia especial de pacto de cumplimiento presenta las siguientes particularidades:

**-Oportunidad:** El juez dentro de los tres (3) días siguientes al vencimiento del término de traslado de la demanda, citará a quienes deban intervenir en la audiencia especial de pacto de cumplimiento. Podrá ser aplazada por una única vez, si antes de la hora señalada para su celebración, alguna de las partes presenta prueba siquiera sumaria de una justa causa para no comparecer, el juez señalará una nueva fecha no antes de quinto día siguiente no después de décimo día, por auto que no tendrá recurso alguno.

Expediente No. 25000-23-27-000-2001-0479-01  
Acumulados Nos. 2000-0428, 2001-0122, 2001-0343  
Actor: GUSTAVO MOYA ÁNGEL Y OTROS  
Acción Popular

**-Intervinientes:** A la audiencia especial deberán comparecer de manera obligatoria además del juez de conocimiento, las partes y el Ministerio Público, y potestativamente podrán intervenir también las personas naturales o jurídicas que hayan registrado comentarios escritos sobre el proyecto. Los funcionarios competentes que no asistan a la audiencia estarán incurso en causal de mala conducta, sancionable con destitución del cargo.

**-Desarrollo de la audiencia:** Una vez constituida la audiencia, el juez, quien dirigirá la audiencia, advertirá a las partes sobre los efectos de dicha actuación y escuchará las diversas posiciones sobre la acción instaurada. Podrá de ésta manera establecerse un pacto de cumplimiento a iniciativa del juez en el que se determine la forma de protección de los derechos e intereses colectivos y el restablecimiento de las cosas a su estado anterior, de ser posible.

**-Revisión del pacto de cumplimiento:** El proyecto de acuerdo alcanzado será revisado por el juez en un plazo de cinco (5) días a partir de su celebración y si observa en él vicios de ilegalidad, éstos serán corregidos por el juez con el consentimiento de las partes interesadas.

**-Cuándo la audiencia se considera fallida:** a) Cuando no comparece la totalidad de las partes interesadas. b) Cuando no se formule proyecto de pacto de cumplimiento. c) Cuando las partes no consientan en las correcciones que el juez proponga al proyecto de pacto de cumplimiento. En tales eventos, el juez dará paso a la etapa probatoria continuando con el trámite normal del proceso de la acción popular.

Expediente No. 25000-23-27-000-2001-0479-01  
Acumulados Nos. 2000-0428, 2001-0122, 2001-0343  
Actor: GUSTAVO MOYA ÁNGEL Y OTROS  
Acción Popular

- **Aprobación del pacto de cumplimiento:** Se hará mediante sentencia, cuya parte resolutive será publicada en un diario de amplia circulación nacional a costa de las partes involucradas.

- **Ejecución del pacto de cumplimiento:** el juez conservará la competencia para su ejecución y podrá designar a una persona natural o jurídica como auditor que vigile y asegure el cumplimiento de la fórmula de solución del conflicto. Es importante resaltar que cuando se celebre un pacto de cumplimiento, éste deberá ser sobre la totalidad de las pretensiones esgrimidas en la demanda, es decir que para que proceda la aprobación del proyecto de pacto, se deberán resolver en él todos y cada uno de los extremos de la litis. Lo anterior se desprende del mismo artículo 27 de la Ley 472 de 1998, pues en él se prevé que la aprobación del proyecto de pacto de cumplimiento deberá hacerse mediante una sentencia, y sentencia es aquella providencia del juez en la cual se decide de fondo sobre la integridad de las pretensiones de la demanda o las excepciones. Así lo señalan tanto el Código de Procedimiento Civil en su artículo 302 como el Código Contencioso Administrativo en su artículo 170.

- **El pacto de cumplimiento no puede ser parcial,** puesto que resulta inconcebible la idea de una protección parcial de un derecho o interés colectivo, no puede dejarse pendiente de protección una parte de ellos, pues esto haría nugatoria la protección como tal y de contera la institución de las acciones populares se vería desdibujada en su finalidad garantística.

Expediente No. 25000-23-27-000-2001-0479-01  
Acumulados Nos. 2000-0428, 2001-0122, 2001-0343  
Actor: GUSTAVO MOYA ÁNGEL Y OTROS  
Acción Popular

- No es posible la existencia de un pacto de cumplimiento parcial, como tampoco lo es la existencia de un proceso con dos sentencias; de establecerse la posibilidad de un pacto de cumplimiento parcial, al final del proceso se tendría la presencia de dos sentencias, una, la aprobatoria de dicho pacto parcial y otra, la que decidiría sobre las pretensiones no resueltas en el pacto de cumplimiento, lo cual resulta a todas luces contrario a la normativa del proceso, lo que de suyo conduciría a invalidar la actuación posterior.

- Por otra parte, si es urgente la necesidad de protección de los derechos e intereses colectivos por la inminencia de su vulneración, y el proyecto de pacto de cumplimiento no fue sobre la totalidad de las pretensiones de la demanda y por lo tanto se declaró fallido, el juez cuenta con la posibilidad de decretar medidas cautelares en los términos del artículo 25 de la Ley 472 de 1998. Ver sentencia C-215/99 de la Corte Constitucional.

- Al tenor del artículo 27 de la Ley 472 de 1998: "La aprobación del pacto de cumplimiento se surtirá mediante sentencia", es mediante este tipo de providencia que debe aprobarse un pacto de cumplimiento; lo anterior en razón a que mediante dicho pacto se va a dar fin al proceso, pues se entiende que las partes llegaron a un acuerdo de mutua aceptación y refrendación judicial, para la protección efectiva de los derechos o intereses colectivos que se consideraron vulnerados y que dieron origen a la tramitación de una acción popular. Es decir, cuando se profiere una sentencia, una vez ejecutoriada hace tránsito a cosa juzgada, es ley para las partes y el

Expediente No. 25000-23-27-000-2001-0479-01  
 Acumulados Nos. 2000-0428, 2001-0122, 2001-0343  
 Actor: GUSTAVO MOYA ÁNGEL Y OTROS  
 Acción Popular

proceso concluye de manera definitiva, pues se ha alcanzado mediante ella el fin último del proceso, cual es el de resolver los extremos litigiosos de la demanda de manera definitiva; por lo tanto el juez de conocimiento pierde la competencia frente a ese asunto concreto, en virtud de que éste ya ha concluido y la litis se entiende zanjada de manera categórica<sup>227</sup>.

Finalmente cabe anotar que de conformidad con el artículo 37 de la Ley 472 de 1998, el recurso de apelación procederá contra la sentencia que se dicte en primera instancia(...).

Interpretando el artículo 27 antes reseñado, la Sala ha observado que la sentencia que aprueba el pacto de cumplimiento es impugnabile por vicios de ilegalidad que puedan afectar el pacto, es decir, por situaciones anteriores a la expedición de la sentencia, que vicien de manera directa la legalidad del acuerdo a que se hubiere llegado en la audiencia respectiva<sup>228</sup>.

En estos términos, para la Sala, se reitera resulta claro que la competencia del juez de segunda instancia se circunscribe a los argumentos expuestos por el recurrente en contra de la decisión que se hubiere adoptado en primera instancia y que resultó desfavorable o perjudicial a sus derechos o intereses; por lo tanto, en

---

<sup>227</sup> CONSEJO DE ESTADO, SALA DE LO CONTENCIOSO ADMINISTRATIVO, SECCION TERCERA, Consejero ponente: RAMIRO SAAVEDRA BECERRA, Bogotá D.C., mayo veintisiete (27) de dos mil cuatro (2004, Radicación número: 66001-23-31-000-2002-00770-01(AP), Actor: EFRAIN DIAZ MARTINEZ.

<sup>228</sup> CONSEJO DE ESTADO, SALA DE LO CONTENCIOSO ADMINISTRATIVO, SECCIÓN PRIMERA, Consejero ponente: MANUEL SANTIAGO URUETA AYOLA, Bogotá, D. C., siete (7) de febrero del dos mil dos (2002), Radicación número: 41001-23-31-000-2001-0719-01(AP-331), Actor: LEONEL HERNÁNDEZ OSPINA, Demandado: MUNICIPIO DE NEIVA.

Expediente No. 25000-23-27-000-2001-0479-01  
Acumulados Nos. 2000-0428, 2001-0122, 2001-0343  
Actor: GUSTAVO MOYA ÁNGEL Y OTROS  
Acción Popular

principio, los demás aspectos, que no fueron planteados en la sustentación del recurso se deben excluir del debate en la instancia superior, toda vez que en el recurso de apelación operan tanto el principio de congruencia de la sentencia como el principio dispositivo (...). En definitiva, si la decisión proferida por el juez de primera instancia fue totalmente favorable a los intereses y derechos de la parte demandada, dicho de otro modo, **si la decisión contenida en la sentencia recurrida no le fue desfavorable al apelante, éste, en los términos de los artículos 267 del C.C.A y 350 del C.P.C carecía de interés jurídico para apelar, pues según las disposiciones citadas solo podrá interponer el recurso la parte a quien le haya sido desfavorable la providencia; (...)"**

En estos términos la Sala concluye que los acuerdos logrados entre el Tribunal de instancia y las partes o intervinientes en este proceso, no son en estricto sentido "Pactos de Cumplimiento" razón por la cual asiste razón al apelante en cuanto que como el proceso siguió su curso y no hubo un verdadero pacto de cumplimiento que hubiese dado por terminado el proceso una vez se hubiese efectuado el control de legalidad por el mismo funcionario de conocimiento, podían ser objeto de la apelación.

Sin embargo, la Sala advierte que dada la naturaleza especial de la acción popular, son de recibo los compromisos asumidos por las entidades y demás partes intervinientes en el proceso, en aras de amparar los derechos colectivos a los habitantes de la cuenca del río

Expediente No. 25000-23-27-000-2001-0479-01  
 Acumulados Nos. 2000-0428, 2001-0122, 2001-0343  
 Actor: GUSTAVO MOYA ÁNGEL Y OTROS  
 Acción Popular

Bogotá, con miras a atenuar o disminuir el daño causado por los múltiples factores que generan la contaminación del río Bogotá y sus afluentes, así como las circunstancias que afectan la cuenca del río en su parte alta, baja y media. En este sentido se modificará la decisión de instancia.

**7.- Es viable la acumulación de los procesos como lo efectuó el Tribunal Administrativo de Cundinamarca en la sentencia de 25 de agosto de 2004?**

Solicita el Ministerio de ambiente, Vivienda y Desarrollo Territorial revisar la acumulación de las acciones, por cuanto la radicada con el No. 0479 pretende la construcción de una Planta de Tratamiento en el Embalse del Muña, mientras que la identificada con el No. 0343 busca la descontaminación del río Bogotá en la Cuenca Alta y las demás persiguen la descontaminación de los afluentes del río Bogotá, lo cual significa que las demandas tienen diferentes demandados y pretensiones; a pesar de ello, se procedió a acumularlas contrariando el artículo 157 del C.P.C.

Ha señalado la Sala que (...) *la decisión de acumular o no diversos procesos no es apelable, sin perjuicio que el Consejo de Estado proceda a acumular asuntos que por su naturaleza deban ser fallados bajo una misma cuerda*<sup>229</sup>.

La Sala reitera que como lo que se pretende es resolver una problemática que comprende todo lo relacionado con la descontaminación de la Cuenca del río Bogotá y sus

---

<sup>229</sup> SALA DE LO CONTENCIOSO ADMINISTRATIVO, SECCIÓN PRIMERA, Consejera ponente: OLGA INÉS NAVARRETE BARRERO, Bogotá, diecisiete (17) de septiembre de dos mil cuatro (2004), Radicación número: 11001-03-15-000-2003-0202-01(AP).

Expediente No. 25000-23-27-000-2001-0479-01  
Acumulados Nos. 2000-0428, 2001-0122, 2001-0343  
Actor: GUSTAVO MOYA ÁNGEL Y OTROS  
Acción Popular

afluentes, consideró el Tribunal de instancia viable acumular los diferentes procesos que tenían relación con este tema y que podían resolverse bajo una misma cuerda, debiendo insistir que como la acción popular no constituye en sí misma una contención, sino que pretende volver las cosas al estado anterior o resarcir un daño a los derechos colectivos, resulta viable, en aras de garantizar su efectividad. Así las cosas, en aras de lograr una solución integral para la recuperación y sostenibilidad de la Cuenca del río Bogotá y sus afluentes, no hay lugar a modificar la decisión que en este sentido se adoptó en la primera instancia. El cargo no prospera.

***8.- Hay lugar a declarar la nulidad por ausencia de notificación personal a todas las personas vinculadas al proceso?***

Señala el Ministerio de Ambiente, Vivienda y Desarrollo Territorial que no todas las partes demandadas fueron notificadas, situación que fue puesta en conocimiento para evitar una nulidad procesal, tal como ocurrió con el Ministerio de Ambiente, Vivienda y Desarrollo Territorial.

En proveído de 1 de agosto del año 2002, se dio curso al incidente de nulidad de la notificación personal y cualquier actuación posterior, propuesto por las sociedades Eternit Colombiana S.A., Líquido Carbónico Colombiana S.A., Cristalería Peldar S.A., Grupo Siderúrgico Diaco S.A., Refisal, Cervecería Leona S.A., Alpina y Empresa Colombiana de Cables en Reestructuración. Así mismo, se tuvo por contestada la

Expediente No. 25000-23-27-000-2001-0479-01  
Acumulados Nos. 2000-0428, 2001-0122, 2001-0343  
Actor: GUSTAVO MOYA ÁNGEL Y OTROS  
Acción Popular

demanda por parte de Industrias Spring S.A. y por la Corporación Autónoma Regional (fls. 1867-1871 c.p. No.3)

Por medio de auto de 30 de agosto del año 2002, se negó el recurso de reposición interpuesto por PROTEICOL S.A., por medio del cual pretendía se declarara la nulidad de los actos procesales de notificación de la demanda, por carecer de soporte que lo respaldara en cuanto en el expediente no obraba su escrito de contestación. De otro lado, se declaró la nulidad de las diligencias de notificación practicadas a las sociedades Eternit Colombiana S.A., Líquido Carbónico Colombiana S.A., Cristalería Peldar S.A., Grupo Siderúrgico Diaco S.A., Refisal, Cervecería Leona S.A., Alpina y Empresa Colombiana de Cables Emcocables en Reestructuración (fls. 1898-1906 c.p. No.3).

El incidente de nulidad promovido por esta razón prosperó según consta en auto de 30 de agosto de 2002. Igualmente el Tribunal consideró que *"(...) dicha causal de invalidez es saneable cuando se actúa dentro del proceso sin alegarla, según la prescripción del numeral 1º del inciso primero del artículo 144 del Código de Procedimiento Civil, aplicable por remisión expresa del artículo 44 de la Ley 472 de 1998, en cuanto la misma no regula esta institución y el Código Contencioso Administrativo remite a tal ordenamiento jurídico (...)"*.

Considera la Sala que en desarrollo del proceso de acción popular se dispuso vincular a las entidades públicas y a los particulares que se estimó podían estar involucrados de una u otra manera en la contaminación del río Bogotá y

Expediente No. 25000-23-27-000-2001-0479-01  
Acumulados Nos. 2000-0428, 2001-0122, 2001-0343  
Actor: GUSTAVO MOYA ÁNGEL Y OTROS  
Acción Popular

sus afluentes, por el uso comercial, industrial o doméstico.

Dichas personas y entidades hicieron manifestaciones en el proceso en las oportunidades procesales correspondientes, luego no resulta viable alegar nuevamente una nulidad por la misma razón, por cuanto con la conducta asumida por las entidades vinculadas se entiende convalidada. La razón de ser de la notificación radica en que las partes se enteren de la existencia del proceso y asuman un comportamiento acorde con la decisión adoptada, como presentar un escrito dándose por enterado, o refiriéndose a la providencia o al proceso así sea de manera tangencial. En el presente caso las partes solicitaron se declarara la nulidad por cuanto no se había surtido el traslado de la demanda, una vez se declaró la nulidad, con su conducta pusieron de manifiesto que tenían conocimiento de la demanda e intervinieron en el proceso a través de sus apoderados, razón por la cual a juicio de la Sala la nulidad propuesta resulta improcedente.

#### **4. APELACIÓN DEL MINISTERIO DE COMERCIO, INDUSTRIA Y TURISMO.**

A través de apoderado judicial debidamente reconocido, la entidad presentó y sustentó recurso de apelación oportunamente planteando la incompetencia de la entidad para asumir las órdenes impartidas por el Tribunal de instancia.

Expediente No. 25000-23-27-000-2001-0479-01  
 Acumulados Nos. 2000-0428, 2001-0122, 2001-0343  
 Actor: GUSTAVO MOYA ÁNGEL Y OTROS  
 Acción Popular

**1.- El Ministerio de Comercio, Industria y Turismo tiene competencia para ejercer control o vigilancia así como para cofinanciar el Programa de Producción más Limpia en el proceso de curtiembres?**

Al respecto cabe anotar que en efecto, como lo advierte el Ministerio impugnante de acuerdo con la parte resolutive de la sentencia, éste no fue condenado por la omisión en el control de los vertimientos de las aguas residuales al río Bogotá y sus afluentes; sin embargo, ello no obsta para que en aras de garantizar los derechos colectivos invocados en este proceso, se le haya involucrado e impartido órdenes a las diferentes autoridades ambientales y organismos que hacen parte del Sistema Nacional Ambiental en los diferentes niveles y fue así como en la sentencia se dispuso en el literal 11):

**"11) En orden a propiciar y controlar los procesos de producción más limpia de las curtiembres de VILLAPINZÓN y CHOCONTÁ, los MUNICIPIOS DE VILLAPINZÓN y de CHOCONTÁ con cargo a sus recursos y/o con la coordinación y cofinanciación del DEPARTAMENTO DE CUNDINAMARCA, la BENEFICENCIA DE CUNDINAMARCA, de la CORPORACIÓN AUTÓNOMA DE CUNDINAMARCA, quien tendrá bajo su responsabilidad la dirección y el cumplimiento de esta orden, la que también con cargo a su presupuesto gestionará los programas de producción más limpia dando prioridad a esta problemática, y con los buenos oficios de los MINISTERIOS DE AMBIENTE VIVIENDA Y DESARROLLO TERRITORIAL Y DE COMERCIO EXTERIOR, dentro del término máximo de un año (1) contado a partir de la notificación de la presente sentencia, deberán cofinanciar todas las obras de infraestructura que requieran dichos procesos de producción más limpia bajo -si es del caso- el sistema de COOPERACIÓN DEL GREMIO DE LAS CURTIEMBRES, según las directrices trazadas en la parte motiva de esta sentencia, procurando para aquellos que se encuentran con necesidades básicas insatisfechas en atención a la precariedad de sus patrimonios y que se ubican dentro**

Expediente No. 25000-23-27-000-2001-0479-01  
Acumulados Nos. 2000-0428, 2001-0122, 2001-0343  
Actor: GUSTAVO MOYA ÁNGEL Y OTROS  
Acción Popular

*de la ZONA DE RONDA DEL RÍO BOGOTÁ, subsidiarles los planes de vivienda en un término que no podrá sobrepasar de un año contado a partir de la notificación de este fallo. Por su parte, aquellos, deberán acatar las órdenes de la autoridad ambiental en lo tocante a los programas de producción más limpia, so pena de su exclusión de la cooperativa y el desalojo inmediato. De otro lado, quienes no se encuentren dentro de este último grupo, esto es los que de acuerdo con su declaración de renta estén en capacidad de costear sus propias viviendas deberán ser desalojados de la zona de ronda en el término máximo de seis (6) meses contados a partir de la notificación de esta sentencia; pero deberán ser incluidos dentro de los Programas de Producción Más limpia de que trata este aparte. En ningún caso habrá lugar a la compra o indemnización de predios que se encuentren dentro de la zona de ronda por tratarse de bienes de propiedad de la Nación y de uso público que ilegalmente fueron invadidos a sabiendas por los que en ellos se encuentran viviendo y adelantando sus procesos de producción de curtición y de los cuales se han usufructuado en detrimento del medio ambiente;*

Para la Sala no cabe duda que la orden impartida por el Tribunal al Ministerio de Comercio Exterior (hoy Comercio, Industria y Turismo) corresponde a la cofinanciación de las obras requeridas para el ejercicio de la actividad industrial de las curtiembres en los municipios de Villapinzón, Chocontá y San Benito (D.C.) municipios en los cuales se desarrolla principalmente la actividad de curtiembres, la cual requiere de la intervención de las autoridades para disminuir su impacto y permitir la sostenibilidad de la actividad, para lo cual se propone la construcción del parque industrial y mejores prácticas a través de la estrategia de "Producción más Limpia-PML".

Es viable, dentro del ordenamiento jurídico colombiano obtener el apoyo del Gobierno Nacional a través de la

Expediente No. 25000-23-27-000-2001-0479-01  
Acumulados Nos. 2000-0428, 2001-0122, 2001-0343  
Actor: GUSTAVO MOYA ÁNGEL Y OTROS  
Acción Popular

cofinanciación de proyectos y asignación de recursos con carácter de no reembolsables para apoyar proyectos de asistencia técnica en los subprogramas de "Estructuración de Proyectos y Planificación Turística", para los municipios de Villapinzón, Chocontá y San Benito D.C. que comprende la realización de obras de infraestructura como Plantas de Tratamiento y Parques industriales no sólo para adecuar hidráulicamente el río Bogotá respecto del control de vertimientos, sino para incentivar el turismo en estas regiones, particularmente en el nacimiento del río Bogotá ubicado en el Páramo de Guacheneque, municipio de Villapinzón.

No es por lo tanto, admisible la justificación del Ministerio de que por el hecho de no ser agente contaminante no tenga nada que ver con la solución del problema; tampoco por el hecho de no asistir a los comités de seguimiento y verificación ordenados en la sentencia se encuentre excluido de la responsabilidad que le atañe como parte del Gobierno Nacional con competencias definidas en la ley.

Así el Decreto 210 de 2003, en el artículo segundo dispone:

ARTÍCULO 2o. FUNCIONES GENERALES. El Ministerio de Comercio, Industria y Turismo tendrá las siguientes funciones generales:

(...)

31. Preparar los anteproyectos de planes y programas de inversión y otros **desembolsos** públicos correspondientes al Ministerio y sus entidades

Expediente No. 25000-23-27-000-2001-0479-01  
Acumulados Nos. 2000-0428, 2001-0122, 2001-0343  
Actor: GUSTAVO MOYA ÁNGEL Y OTROS  
Acción Popular

adscritas o vinculadas y los Planes de Desarrollo Administrativo de los mismos.

32. Coordinar la ejecución de sus planes y programas con las entidades territoriales y prestarles asesoría, cooperación y asistencia técnica en lo de su competencia.

De otra parte, dentro de la Política de Producción más limpia de agosto de 1997<sup>230</sup>, se propuso la articulación con las políticas gubernamentales con el objeto de incorporar la variable ambiental en las demás políticas gubernamentales orientadas a los sectores productivos, a través de Comités Interministeriales, con el objeto de coordinar la gestión pública, evaluar las políticas sectoriales y servir de asesor del DNP a través de Convenios Interadministrativos con los Ministerios incluido el de Desarrollo Económico, así como a través de la creación de Comités Técnicos Sectoriales integrados por los Ministerios y las Corporaciones Autónomas Regionales, entre otros.

En estos términos, el Ministerio de Comercio, Industria y Turismo tiene competencia para prestar asesoría, cooperación y asistencia técnica a las entidades territoriales, así como para preparar los anteproyectos de planes y programas de inversión y otros desembolsos públicos correspondientes al Ministerio, sin desconocer el procedimiento de ley, esto es a través de proyectos que asignen los recursos para la asistencia técnica requerida.

---

<sup>230</sup> Programa de Producción Limpia, Política Nacional de Producción más Limpia, Bogotá, D.C., agosto de 1997. República de Colombia, Ministerio del Medio Ambiente.

Expediente No. 25000-23-27-000-2001-0479-01  
Acumulados Nos. 2000-0428, 2001-0122, 2001-0343  
Actor: GUSTAVO MOYA ÁNGEL Y OTROS  
Acción Popular

Si bien el Ministerio de Comercio, Industria y Turismo, no es una entidad que contamine, si tiene dentro de sus funciones y acorde con las políticas de "Producción más Limpia" y de "Producción y Consumo Sostenible", un papel importante de asesoría, cooperación y asistencia técnica en materia ambiental a las entidades del orden departamental y municipal, así como al Departamento de Planeación Nacional.

De otra parte, cabe anotar que desde hace más de una década, el Ministerio de Ambiente, Vivienda y Desarrollo Territorial, con el apoyo interinstitucional, ha venido implementando la Política Nacional de Producción más Limpia, y desde hace siete años, la Estrategia Nacional de Mercados Verdes<sup>231</sup>, en la cual se destaca que las lecciones aprendidas con dichos procesos conforman una base importante para enfocar la Política de Producción y Consumo Sostenible. Más que iniciar un camino diferente, la política busca consolidar esfuerzos contruidos sobre los resultados exitosos y aprendiendo de las experiencias negativas.

Las lecciones aprendidas reflejan las particularidades del contexto en donde se desarrolla esta política. En primera instancia, la experiencia contribuyó a generar capacidades, tanto en empresas, como en autoridades ambientales, universidades, organizaciones no gubernamentales (ONG), organizaciones comunitarias y centros de consultoría e investigación. De allí que dentro del programa de Producción y Consumo Sostenible

---

<sup>231</sup> Política Nacional de Producción y Consumo Sostenible "Hacia una cultura de consumo sostenible y transformación productiva" Ministerio de Ambiente, Vivienda y Desarrollo Territorial, 2011.

Expediente No. 25000-23-27-000-2001-0479-01  
Acumulados Nos. 2000-0428, 2001-0122, 2001-0343  
Actor: GUSTAVO MOYA ÁNGEL Y OTROS  
Acción Popular

se apunte a desarrollar estrategias para consolidar y fortalecer las capacidades actuales y ampliarlas hacia nuevas instituciones.

Al ser el Ministerio de Industria, Comercio y Turismo parte del Gobierno Nacional, le compete intervenir de manera activa en la elaboración de las políticas correspondientes, previstas en la ley en el ámbito de su competencia, de conformidad con los principios de coordinación y colaboración, para garantizar la armonía en el ejercicio de sus respectivas funciones y lograr los fines y cometidos estatales, según lo prevé el artículo 6° de la Ley 489 de 1998.

Razones suficientes para considerar que los argumentos del apelante no prosperan.

##### 5. APELACIÓN DEL MINISTERIO DE HACIENDA Y CRÉDITO PÚBLICO.

El apoderado del Ministerio de Hacienda y Crédito Público presentó recurso de apelación; aseveró que si bien es cierto la entidad no resultó condenada, también lo es que resulta de suma importancia su pronunciamiento sobre ciertos aspectos relacionados con la conminación efectuada.

Aseguró que la sentencia se refiere a las transferencias correspondientes al **sistema general de participaciones** para que el Ministerio en forma oportuna y sin dilaciones transfiera los recursos, lo cual ha realizado oportunamente en los términos de ley. Así mismo, aseguró que girará los demás recursos en la oportunidad correspondiente.

Expediente No. 25000-23-27-000-2001-0479-01  
Acumulados Nos. 2000-0428, 2001-0122, 2001-0343  
Actor: GUSTAVO MOYA ÁNGEL Y OTROS  
Acción Popular

En lo atinente a las **transferencias por concepto de regalías a los municipios y al Distrito Capital**, las cuales deben ser destinadas al saneamiento del río Bogotá, precisó que deben ser modificadas para que puedan ser aplicadas de acuerdo con los principios de coherencia macroeconómica y legalidad del gasto. No obstante, alegó que tal actuación se convertiría en una obligación jurídicamente imposible al contemplar gastos adicionales a los que prevé el Presupuesto General de la Nación.

Así plantea como problemas a resolver:

**1.- La sentencia de primera instancia al disponer sobre la forma de realizar las transferencias tanto del sistema general de participaciones como el de regalías, desconoce los principios de coherencia macroeconómica y legalidad del gasto, generando una serie de consecuencias adversas para toda la economía nacional?**

Al respecto la Sala considera:

La sentencia en el numeral tercero literal v) ordenó:

**"v) El FONDO NACIONAL DE REGALÍAS y el MINISTERIO DE HACIENDA Y CRÉDITO PÚBLICO deberán dar cumplimiento a lo dispuesto en el punto 6.16.3. sobre las transferencias por concepto de regalías a los municipios y al Distrito Capital, debiendo pagar lo que hasta la presente adeudan a estos entes en los términos señalados en la parte motiva. Así también, dicho Ministerio deberá realizar las transferencias de Ley 715 correspondientes al 41% del Propósito General a los municipios de la Cuenca Alta, Media y Baja del RÍO BOGOTÁ, como al Distrito Capital".**

El acápite de la sentencia del Tribunal de instancia en el numeral 6.16.3 dijo:

Expediente No. 25000-23-27-000-2001-0479-01  
 Acumulados Nos. 2000-0428, 2001-0122, 2001-0343  
 Actor: GUSTAVO MOYA ÁNGEL Y OTROS  
 Acción Popular

"6.16.3. De otra parte, en orden a procurar el cumplimiento de las obligaciones del Distrito Capital como de los municipios, EL FONDO NACIONAL DE REGALÍAS y EL MINISTERIO DE HACIENDA Y CRÉDITO PÚBLICO deberán realizar las correspondientes reservas de los dineros por concepto de REGALÍAS, cancelando a las que se causaron y que fueron objeto de reclamo por parte de los entes territoriales que hasta la presente se les adeudan, debiendo proceder a realizar las correspondientes apropiaciones en el presupuesto de gastos del FONDO NACIONAL DE REGALÍAS, para continuar cumpliendo de manera oportuna y sin dilaciones las transferencias por este concepto a los municipios como al Distrito Capital, por cuanto cualquier retardo incidirá en la ejecución de las obras que con tales recursos se proyecten".

No es de recibo el argumento del apelante por cuanto en ningún momento se pretende, con la orden impartida por el Tribunal de instancia, desconocer el principio de coherencia macroeconómica y legalidad del gasto<sup>232</sup>, mucho menos ella implica un desconocimiento de la competencia del Ministerio de Hacienda y Crédito Público; lo único que se solicita es realizar los desembolsos que por concepto de regalías han sido asignados de manera directa al Distrito Capital y a los

---

<sup>232</sup> Alcance definido por la Corte Constitucional en sentencia C- 935 de 2004 al precisar que "en el caso del principio de coherencia macroeconómica la norma se limita a señalar que el presupuesto debe ser "compatible" con las metas macroeconómicas fijadas por el Gobierno en coordinación con la Junta Directiva del Banco de la República. (...) Ha de tenerse en cuenta así mismo que en el caso del principio de homeóstasis presupuestal la norma en la que éste se contiene se limita a señalar que el crecimiento real del Presupuesto de Rentas incluida la totalidad de los créditos adicionales de cualquier naturaleza, deberán guardar "congruencia" con el crecimiento de la economía, de tal manera que no genere desequilibrio macroeconómico. Se trata entonces de que se eviten excesos en la estimación de los ingresos que puedan dar lugar a un déficit estructural, en cuanto al no corresponder dicha estimación con la realidad de la actividad económica que permita la generación de esos ingresos se produzca un desfase de tal magnitud que altere los grandes equilibrios que sirven de sustento al sistema económico (...)".

Expediente No. 25000-23-27-000-2001-0479-01  
Acumulados Nos. 2000-0428, 2001-0122, 2001-0343  
Actor: GUSTAVO MOYA ÁNGEL Y OTROS  
Acción Popular

municipios. Igualmente, que para el evento en que se hayan registrado los proyectos y ellos hayan recibido el aval del Departamento Nacional de Planeación -DNP, se surtan los desembolsos correspondientes, acorde con el procedimiento establecido en la Constitución Política y la ley; para el momento en que se profirió el fallo se encontraban vigentes los artículos 360 y 361 de la Constitución Política y las Leyes 141 y 152 de 1994, expedidas en desarrollo de aquellos.

Vale la pena destacar los argumentos traídos por el apelante en los alegatos de conclusión en los cuales advierte que tal como se acreditó en el proceso, entre 1999 y 2003 se transfirieron \$36.448.408.955 por concepto de regalías, con cargo a los recursos del Fondo Nacional de Regalías para la conservación y descontaminación del río Bogotá y en el mismo sentido, dentro de los recursos que transfiere la Nación por concepto de Sistema General de Participaciones correspondientes a Propósito General, el Ministerio ha girado y continúa girando en forma oportuna al Distrito Capital como a los restantes municipios. Igualmente acreditó el pago correspondiente al período 2004-2012.

En cuanto a la participación como garante en los contratos de empréstito que requiera la EAAB y el pago de los réditos de dicha deuda por parte de la Nación, argumenta el Ministerio que todo aval está sujeto a las exigencias y requisitos técnico-legales necesarios para la suscripción de créditos con garantía de la Nación, en especial en los previstos en el Decreto 2681 de

Expediente No. 25000-23-27-000-2001-0479-01  
Acumulados Nos. 2000-0428, 2001-0122, 2001-0343  
Actor: GUSTAVO MOYA ÁNGEL Y OTROS  
Acción Popular

1993, razón por la cual no es viable atender el requerimiento del Tribunal de Cundinamarca.

Advierte que la Nación ha venido siendo garante en otros contratos de empréstito que algunas entidades condenadas en este proceso han proyectado para atender la ejecución de obras dentro del Programa de Descontaminación del río Bogotá, razón por la cual el fallo de segunda instancia deberá coordinar el uso de los dineros obtenidos por transferencias y por créditos de manera integral para que no continúe ocurriendo lo que hasta ahora, que una gran cantidad de recursos destinados por las entidades territoriales y descentralizadas del orden departamental y distrital a programas de descontaminación del río Bogotá, se han manejado en forma descoordinada sin resultados positivos y definitivos a pesar de llevar más de quince años de trabajo en este frente.

Agrega que de emplearse de forma eficiente los recursos, una vez se establezcan los costos reales para la culminación de las obras conocidas como Estación Elevadora de Canoas, Planta de Tratamiento de Canoas e interceptor Canoas-Alicachín y determinada la necesidad de los recursos requeridos con crédito se inicien los correspondientes estudios y trámites para su obtención y así la Nación pueda ser partícipe como garante de los contratos de empréstito respectivos.

Señala que el Ministerio no fue condenado por omisión en relación con la transferencia de recursos pues la ausencia de ejecución y la falta de obras tendientes al

Expediente No. 25000-23-27-000-2001-0479-01  
Acumulados Nos. 2000-0428, 2001-0122, 2001-0343  
Actor: GUSTAVO MOYA ÁNGEL Y OTROS  
Acción Popular

manejo ambiental de la cuenca y a la descontaminación del río Bogotá no obedece a la falta de recursos del orden nacional ni a la oportuna y puntual puesta a disposición de los dineros por concepto de regalías y otras transferencias que por ley compete a la Nación Ministerio de Hacienda y Crédito Público.

Indica que corresponde a la EAAB asumir los costos de la construcción y ejecución de las obras vinculadas a la PTAR Canoas, ya sea con recursos propios, recursos transferidos por el Distrito Capital o de empréstitos y no con cargo a recursos de la Nación.

De otra parte manifiesta que la decisión contenida en el literal d) del punto quinto de la sentencia carece de fundamento legal, puesto que la Nación solo puede asumir deudas de empresas estatales cualquiera sea su orden territorial, en los eventos de saneamiento financiero o producto de la liquidación administrativa de empresas estatales.

Finalmente anota que los principios constitucionales del Estado Social de Derecho deben aplicarse y exigirse a las entidades territoriales, más aún cuando los programas de descontaminación del río Bogotá corresponden al D.C. y a su empresa de acueducto -EAAB, entidades con la suficiente capacidad técnica y financiera para no solo apropiarse los recursos para la PTAR Canoas, sino también para exigírseles un manejo eficiente de ellos.

Expediente No. 25000-23-27-000-2001-0479-01  
 Acumulados Nos. 2000-0428, 2001-0122, 2001-0343  
 Actor: GUSTAVO MOYA ÁNGEL Y OTROS  
 Acción Popular

Acorde con estas precisiones hechas por el propio Ministerio y con los fundamentos esbozados por esta Sala el cargo no prospera.

#### 6. APELACIÓN DEL MINISTERIO DE MINAS Y ENERGIA.

Problemas jurídicos a resolver:

**1.- Existe hoy una regulación expresa para delimitar las zonas excluidas de la minería en la zona de influencia de la cuenca del río Bogotá?**

Al respecto, cabe anotar que los literales b y d del numeral primero de la sentencia, respecto de los cuales el Ministerio de Minas y Energía manifiesta su inconformidad señalan:

**TERCERO:** Como consecuencia, para restituir las cosas a su estado anterior, esto es, para lograr la descontaminación del RÍO BOGOTÁ y SUS AFLUENTES de que dan cuenta las pretensiones y del EMBALSE DEL MUÑA, deberán observarse también las siguientes directrices respecto de la ejecución de las obras que en los pactos de cumplimiento se mencionan, en orden de prioridad: (...) **b)** De conformidad con la función que el artículo 5 de la Ley 99 de 1993 le adscribe al MAVDT, en el término máximo de tres (3) meses contados a partir de la notificación de esta sentencia, éste debe proceder a delimitar geográficamente en forma clara cuáles son las **zonas excluidas de la minería**, esto es, dónde no podrán ejecutarse trabajos y obras de exploración y explotación minera, según la previsión del artículo 34 de la Ley 685 de 2001 o "Código de Minas" y bajo las directrices señaladas por la Corte Constitucional en la sentencia C-339 de 2002. Para tal efecto, la autoridad minera (que es la que se define y señala en el art. 317 de la citada ley, en principio el Ministerio de Minas y Energía) tiene el deber de colaboración, el cual no limita ni condiciona el ejercicio de la competencia de la autoridad ambiental quien es la que debe establecer tales zonas; **c)**

Expediente No. 25000-23-27-000-2001-0479-01  
 Acumulados Nos. 2000-0428, 2001-0122, 2001-0343  
 Actor: GUSTAVO MOYA ÁNGEL Y OTROS  
 Acción Popular

*Igualmente, en el término máximo de seis (6) meses contados a partir del vencimiento del plazo fijado en el literal b), el MAVDT con la intervención y colaboración del MINISTERIO DE MINAS Y ENERGÍA debe proceder en consecuencia a revocar y suspender los títulos, permisos, concesiones y licencias de las exploraciones mineras en las zonas de exclusión.;*

El artículo 34 de la Ley 685 de 2001 le asigna competencia al Ministerio de Ambiente para delimitar las zonas excluidas de la minería:

Artículo 34. Zonas excluibles de la minería. No podrán ejecutarse trabajos y obras de exploración y explotación mineras en zonas declaradas y delimitadas conforme a la normatividad vigente como de protección y desarrollo de los recursos naturales renovables o del ambiente y que, de acuerdo con las disposiciones legales sobre la materia, expresamente excluyan dichos trabajos y obras.

Las zonas de exclusión mencionadas serán las que se constituyan conforme a las disposiciones vigentes, como áreas que integran el sistema de parques nacionales naturales, parques naturales de carácter regional y zonas de reserva forestales. Estas zonas para producir estos efectos, deberán ser delimitadas geográficamente por la autoridad ambiental con base en estudios técnicos, sociales y ambientales con la colaboración de la autoridad minera, en aquellas áreas de interés minero.

(...)

El Ministerio de Ambiente expidió la Resolución 813 de 2004 que fue sustituida posteriormente por la Resolución 1197 de 2004, acto administrativo respecto del cual esta Sección se pronunció sobre su legalidad en sentencia de 2 de junio de 2011<sup>233</sup>, al considerar que el Ministerio de

---

<sup>233</sup> CONSEJO DE ESTADO, SALA DE LO CONTENCIOSO ADMINISTRATIVO, SECCION PRIMERA, Consejera ponente: MARIA ELIZABETH GARCIA GONZALEZ, Bogotá, D.C., dos (2) de junio de dos mil once (2011), Radicación número: 11001-03-24-000-2005-00167-01.

Expediente No. 25000-23-27-000-2001-0479-01  
Acumulados Nos. 2000-0428, 2001-0122, 2001-0343  
Actor: GUSTAVO MOYA ÁNGEL Y OTROS  
Acción Popular

Ambiente es competente para regular las zonas excluidas de la minería.

Dicha normatividad existe en relación con la delimitación de zonas excluidas de la minería, pero en coordinación con el Ministerio de Minas y Energía acorde con las normas previstas en el Código de Minas y demás disposiciones concordantes, como también lo precisó la Corte Constitucional en sentencia C-339 de 2002, en la cual declaró la constitucionalidad condicionada del inciso segundo de esta disposición por considerar que:

"El inciso segundo señala que las zonas de exclusión se encuentran integradas por las siguientes áreas: a) el sistema de parques nacionales naturales, b) los parques naturales de carácter regional y, c) las zonas de reserva forestal. Con lo anterior se pretende la protección de la biodiversidad, de acuerdo con la gran importancia de Colombia a nivel mundial como lo reconoció la Corte cuando analizó el tema(13). La Corte precisa que además de las zonas de exclusión previstas en esta Ley, pueden existir otras, ya declaradas con anterioridad o que se declaren en el futuro por la autoridad ambiental.

(...)

"Naturalmente las zonas excluidas deben ser claramente delimitadas geográficamente y **esta función se le asigna a la autoridad ambiental en integración y armonía con lo preceptuado por el artículo 5 de la ley 99 de 1993.** Además incluye la colaboración de la autoridad minera en las áreas de interés minero, con lo cual se hace efectivo el principio de protección prioritaria de la biodiversidad del país junto con un aprovechamiento en forma sostenible, de acuerdo con lo principios universales y de desarrollo sostenible contenidos en la Declaración de Río de Janeiro de junio de 1992, ratificada por Colombia".

"Se hace necesario para la Corte señalar que la autoridad minera tiene el deber de colaborar con la autoridad ambiental, pero que este deber de colaboración no limita ni condiciona el ejercicio de

Expediente No. 25000-23-27-000-2001-0479-01  
 Acumulados Nos. 2000-0428, 2001-0122, 2001-0343  
 Actor: GUSTAVO MOYA ÁNGEL Y OTROS  
 Acción Popular

la competencia de la autoridad ambiental quien es la que puede establecer las zonas de exclusión; por esta razón en la parte resolutive se condicionará la exequibilidad del inciso segundo del artículo 34 de la ley 685 de 2001".

En este sentido las autoridades competentes, esto es los Ministerios de Ambiente y Minas, aún no han expedido la resolución que defina las zonas excluidas de la Minería, ya que la Resolución 1197 de 2004 fue declarada parcialmente nula por el Consejo de Estado por considerar que al no haberse contado con el concepto técnico del Ministerio de Minas y Energía, el acto se encontraba viciado de nulidad, así lo sostuvo en la sentencia<sup>234</sup> al precisar:

"Se trata, como toda atribución administrativa, de una competencia reglada que impone una serie de condiciones para que pueda ser aplicada:

(i) La delimitación geográfica debe adelantarse con base en estudios técnicos, sociales y ambientales (exigencia de experticia fundamental).

(ii) Esos estudios técnicos, sociales y ambientales deben llevarse a cabo con la colaboración de la autoridad minera (principio de coordinación y colaboración administrativa)

(iii) El acto administrativo que contiene la decisión de exclusión o restricción de trabajos y obras de exploración y explotación mineras en las zonas de protección y desarrollo de los recursos naturales renovables o del ambiente, debe estar expresamente motivado en estudios que determinen la incompatibilidad o restricción en relación con las actividades mineras (deber de motivación en la experticia)".

---

<sup>234</sup> CONSEJO DE ESTADO, SECCIÓN TERCERA, Consejera Ponente: RUTH STELLA CORREA PALACIO, Bogotá, D.C., veintitrés (23) de junio de dos mil diez (2010), Radicación número: 110010326000200500041 00 (30987).

Expediente No. 25000-23-27-000-2001-0479-01  
Acumulados Nos. 2000-0428, 2001-0122, 2001-0343  
Actor: GUSTAVO MOYA ÁNGEL Y OTROS  
Acción Popular

Y en estos términos concluye:

De manera que con arreglo al referido pronunciamiento de constitucionalidad modulada:

(i) La autoridad minera tiene el deber de colaborar con la autoridad ambiental (principio de coordinación y colaboración administrativa).

(ii) Ese deber de colaboración no limita ni condiciona el ejercicio de la competencia de la autoridad ambiental.

(iii) En la autoridad ambiental está radicada la atribución de establecer las zonas de exclusión (competencia *ratione materiae*).

Como esta regulación no ha sido expedida aún resulta imperioso que en el menor tiempo posible el Ministerio de Ambiente y Desarrollo Sostenible expida el correspondiente acto administrativo con la colaboración del Ministerio de Minas y Energía.

De otra parte, hoy, acorde con la nueva estructura de la Administración Pública corresponde a la Agencia Nacional de Minería -ANM-, adscrita al Ministerio de Minas y Energía según lo dispone el Decreto 4134 de 2011, realizar los procesos de titulación, registro, asistencia técnica, fomento, promoción y vigilancia de las obligaciones emanadas de los títulos y solicitudes de áreas mineras, cuando le sea delegada esta función por el Ministro del ramo.

En el artículo 3º, señala el objeto y funciones de la entidad, así:

ARTÍCULO 3o. *OBJETO*. El objeto de la Agencia Nacional de Minería, ANM, es administrar integralmente los recursos minerales de propiedad del Estado, promover

Expediente No. 25000-23-27-000-2001-0479-01  
 Acumulados Nos. 2000-0428, 2001-0122, 2001-0343  
 Actor: GUSTAVO MOYA ÁNGEL Y OTROS  
 Acción Popular

el aprovechamiento óptimo y sostenible de los recursos mineros de conformidad con las normas pertinentes y en coordinación con las autoridades ambientales en los temas que lo requieran, lo mismo que hacer seguimiento a los títulos de propiedad privada del subsuelo cuando le sea delegada esta función por el Ministerio de Minas y Energía de conformidad con la ley.

ARTÍCULO 4o. *FUNCIONES*. Son funciones de la Agencia Nacional de Minería, ANM las siguientes:

1. Ejercer las funciones de autoridad minera o concedente en el territorio nacional.
2. Administrar los recursos minerales del Estado y conceder derechos para su exploración y explotación
3. Promover, celebrar, administrar y hacer seguimiento a los contratos de concesión y demás títulos mineros para la exploración y explotación de minerales de propiedad del Estado **cuando le sea delegada esta función por el Ministerio de Minas y Energía de conformidad con la ley. (...).**

Luego también corresponde al Ministerio de Minas y Energía, junto con la Agencia Nacional de Minería, asumir la competencia relacionada con los títulos mineros, incluida su cancelación por incumplimiento y demás sanciones a que haya lugar. Más aún cuando como lo afirma el Ministerio en sus alegatos de conclusión, en el actual código de minas, el legislador en aras de buscar el desarrollo sostenible de los recursos no renovables y renovables, estableció una perfecta interacción de los asuntos ambientales y mineros; igualmente en su escrito de alegatos reconoce que la actividad minera cumple con un papel preponderante en la economía, tradición y subsistencia de buena parte de la población colombiana.

El cargo no prospera.

Expediente No. 25000-23-27-000-2001-0479-01  
Acumulados Nos. 2000-0428, 2001-0122, 2001-0343  
Actor: GUSTAVO MOYA ÁNGEL Y OTROS  
Acción Popular

**2.- Puede el Tribunal condenar al Ministerio de Minas y Energía por omisión en el control de vertimientos de aguas residuales en la actividad minera cuando esta facultad está atribuida legalmente a las autoridades ambientales?**

Afirma el Ministerio de Minas y Energía que las órdenes que le impuso el Tribunal están por fuera de su ámbito de acción legal. No puede el Tribunal de instancia condenar al Ministerio por omisión en el control de vertimientos de aguas residuales en la actividad minera, cuando dicha función se encuentra legalmente atribuida a las autoridades ambientales.

Considera la Sala:

De conformidad con lo establecido en los numerales 10 y 12 del artículo 31 de la Ley 99 de 1993, compete a las corporaciones autónomas regionales, fijar en el área de su jurisdicción, los límites permisibles de descarga, transporte o depósito de sustancias, productos, compuestos o cualquier otra materia que puedan afectar el ambiente o los recursos naturales renovables y prohibir, restringir o regular la fabricación, distribución, uso, disposición o vertimiento de sustancias causantes de degradación ambiental. Estos límites restricciones y regulaciones en ningún caso podrán ser menos estrictos que los definidos por el Ministerio del Medio Ambiente (hoy Ministerio de Ambiente, Vivienda y Desarrollo Territorial); y ejercer las funciones de evaluación, control y seguimiento ambiental de los usos del agua y el suelo, lo cual comprenderá el vertimiento o incorporación de sustancias o residuos líquidos, sólidos y gaseosos, a

Expediente No. 25000-23-27-000-2001-0479-01  
Acumulados Nos. 2000-0428, 2001-0122, 2001-0343  
Actor: GUSTAVO MOYA ÁNGEL Y OTROS  
Acción Popular

las aguas en cualquiera de sus formas o a los suelos. Estas funciones comprenden la expedición de las respectivas licencias ambientales, permisos y concesiones.

No hay duda que la regulación sobre los vertimientos debe ser ejercido por la autoridad ambiental, esto es, el Ministerio de Ambiente y Desarrollo Sostenible y el control por las Corporaciones Autónomas Regionales. La intervención del Ministerio de Minas se limita a participar en la respectiva regulación junto con el Ministerio de Ambiente, a través del Consejo Nacional Ambiental creado por la Ley 99 de 1993.

De acuerdo con la normatividad vigente prevista en la Ley 99 de 1993 y demás disposiciones que la desarrollan, el Ministerio de Minas y Energía participa en la elaboración de las políticas en materia ambiental a través del Consejo Nacional Ambiental, del cual es miembro, sin embargo es esencialmente un ente regulador de la política minero-energética, razón por la cual habrá de revocarse la sentencia en este sentido.

**3.- Tiene competencia el Ministerio de Minas y Energía para cumplir con las órdenes impartidas en los literales e), ñ) y q)?**

Expresó el Ministerio de Minas y Energía que no se puede dar cumplimiento a los ordinales e), ñ) y q) de la sentencia porque al destinar recursos para cumplir con las obligaciones allí impuestas, se estaría extralimitando en el ejercicio de sus funciones.

Expediente No. 25000-23-27-000-2001-0479-01  
Acumulados Nos. 2000-0428, 2001-0122, 2001-0343  
Actor: GUSTAVO MOYA ÁNGEL Y OTROS  
Acción Popular

Específicamente alude a la reubicación en los demás complejos mineros de las familias que se encuentran lavando arenas en el río Tunjuelo con necesidades básicas insatisfechas, en la forma dispuesta en la sentencia se sale de la órbita de competencia del Ministerio de Minas y Energía.

Igualmente aseveró que del fallo puede concluirse que las familias a reubicar, en todo caso, son explotadoras ilegales de arena frente a las cuales la autoridad minera debe proceder al cierre inmediato (art. 306 del Código de Minas).

Hizo alusión a la Resolución 76 de 1977, que declaró la reserva forestal Nacional Cuenca Alta del Río Bogotá, para afirmar que por no estar inscrita en la Oficina de Registro de Instrumentos Públicos, no produce efectos frente a terceros y en consecuencia los títulos mineros otorgados se encuentran vigentes. Este último aspecto no fue objeto de apelación y por lo tanto la Sala se abstendrá de pronunciarse.

Consideraciones de la Sala:

La sentencia en los citados literales dispuso:

**"e)** (...) En relación con las familias que se encuentran lavando arenas en el RÍO TUNJUELO con necesidades básicas insatisfechas, la CAR y el DAMA dentro del territorio de su jurisdicción, respectivamente, con la participación del MINISTERIO DE MINAS Y ENERGÍA dentro de lo de su competencia, deberán hacer posible su reubicación en los demás complejos mineros, e igualmente, el DISTRITO CAPITAL como el DEPARTAMENTO DE CUNDINAMARCA y LA

Expediente No. 25000-23-27-000-2001-0479-01  
 Acumulados Nos. 2000-0428, 2001-0122, 2001-0343  
 Actor: GUSTAVO MOYA ÁNGEL Y OTROS  
 Acción Popular

*BENEFICENCIA DE CUNDINAMARCA deberán dar prioridad a los programas sociales y educativos de esta comunidad en la forma dispuesta en la parte motiva de esta sentencia; (...)ñ) De conformidad con lo dispuesto en el punto 6.5.1.9. Los municipios y el Distrito capital deberán expedir dentro del término máximo de seis (6) meses la reglamentación de los usos del suelo ñ)De conformidad con lo dispuesto en el punto 6.5.1.9. Los municipios y el Distrito capital deberán expedir dentro del término máximo de seis (6) meses la reglamentación de los usos del suelo; (...)q) **ORDÉNASE** a los MINISTERIOS DE LA PROTECCIÓN SOCIAL, DE MINAS Y ENERGÍA, DE COMERCIO EXTERIOR, DE AGRICULTURA y de EDUCACIÓN, al DEPARTAMENTO NACIONAL DE PLANEACIÓN para que planeen y ejecuten coordinadamente con el MINISTERIO DE AMBIENTE, VIVIENDA Y DESARROLLO TERRITORIAL todos los programas relacionados con las funciones adscritas en el artículo 5° de la Ley 99 de 1993, según los términos consignados en el punto 6.5.2.;*

Por su parte el numeral 6.5.2.de la parte considerativa de la sentencia, dispuso:

"(...) 6.5.2. DE LA COMPETENCIA Y DE LA RESPONSABILIDAD DE LOS DEMÁS MINISTERIOS EN MATERIA AMBIENTAL. Pasando a la actividad que deben desplegar los demás ministerios en torno al problema ambiental del RÍO BOGOTA y de sus afluentes, que se refiere, según la enumeración que hace el artículo 5° de la Ley 99, al cumplimiento de las funciones transcritas en el punto 6.4.2.4.1. y que apuntan hacia la adopción de políticas de control de crecimiento demográfico de la población de la cuenca del río y sus afluentes en lo que al MINISTERIO DE SALUD le concierne, al control de asentamientos humanos y de expansión urbana que se radica en el MAVDT (entre los cuales pueden incluirse los programas de inversión del sector productivo de la cuenca en orden a la consecución de préstamos que le permitan alcanzar las metas de los proyectos de producción más limpia implementados por la CAR y por el DAMA), así también hacia la incorporación de los planes, programas y proyectos ambientales en el Plan Nacional de Inversiones por parte del Gobierno, quien debe someterlos a consideración del Congreso, para lo cual el DEPARTAMENTO NACIONAL DE PLANEACIÓN debe

Expediente No. 25000-23-27-000-2001-0479-01  
Acumulados Nos. 2000-0428, 2001-0122, 2001-0343  
Actor: GUSTAVO MOYA ÁNGEL Y OTROS  
Acción Popular

prestar la correspondiente asesoría al MAVDT en su preparación, de igual manera, hacia la adopción de los planes y programas docentes y su inclusión en el pensum en los distintos niveles de educación por parte del MINISTERIO DE EDUCACIÓN, políticas todas que, en fin, comprenden el cumplimiento de la obligación constitucional de realizar oportunamente las transferencias de los recursos a las entidades territoriales para el desarrollo de los planes de inversión ambiental -entre otros los del Fondo Nacional de Regalías por parte del MINISTERIO DE HACIENDA-FONDO NACIONAL DE REGALÍAS, precepto superior, que según la afirmación de algunos municipios y del Distrito Capital, está siendo desacatado porque se les adeuda las de varios años, no obstante a que dicen haberlas solicitado oportunamente.(...)

Dentro de este contexto, no encuentra la Sala razón para considerar que la orden impartida desconoce la competencia del Ministerio de Minas y Energía, puesto que la misma se expide de conformidad con las competencias atribuidas por el ordenamiento jurídico, particularmente las relativas a fijar políticas de control de crecimiento demográfico de la población de la cuenca del río y sus afluentes, así como de coordinación intersectorial, que compete al Consejo Nacional Ambiental, del cual es miembro. Ello no implica que el Ministerio de Minas y Energía tenga que hacer erogaciones que como afirma exceden su competencia.

El cargo no prospera.

***4.- Tiene competencia el Ministerio de Minas y Energía para asumir los costos por concepto del dragado de lodos?***

Estima el Ministerio de Minas y Energía que no tiene dentro de sus funciones el control de vertimiento de

Expediente No. 25000-23-27-000-2001-0479-01  
 Acumulados Nos. 2000-0428, 2001-0122, 2001-0343  
 Actor: GUSTAVO MOYA ÁNGEL Y OTROS  
 Acción Popular

aguas, y no puede asumir los costos por el dragado de lodos generados y depositados, debido a que es competencia de la autoridad ambiental a través del Plan de Manejo establecer las medidas de control, mitigación y recuperación de los sedimentos generados durante el proceso minero.

Señaló al respecto la sentencia de primera instancia:

**CUARTO: DECLÁRASE** que la descontaminación del RÍO BOGOTÁ y sus afluentes de que dan cuenta las pretensiones y del EMBALSE DEL MUÑA, también comprende la ejecución de las siguientes obras que fueron materia de análisis y aprobación en los respectivos pactos de cumplimiento como por la MESA DE SOLUCIÓN TÉCNICA INTEGRAL PARA LA DESCONTAMINACIÓN DEL RÍO BOGOTÁ que para el efecto se llevó a cabo con la intervención de todos los técnicos expertos que representaron a cada uno de los entes públicos demandados, como se da cuenta en la parte motiva: (...) **h) EL DRAGADO** del RÍO BOGOTÁ Y DE SUS AFLUENTES correrá con cargo a los recursos de la EAAB, de la CAR del MAVDT y del MINISTERIO DE MINAS Y ENERGÍA en la forma señalada en el punto 6.18.de la parte motiva de este fallo.

En la parte considerativa de la sentencia se sostuvo:

"6.18. DEL DRAGADO DEL RIO Y SUS AFLUENTES correrá por cuenta de la E.A.A.B. en la franja de los ríos y en los términos y plazos que tiene presupuestado y de la CORPORACION AUTONOMA REGIONAL DE CUNDINAMARCA CON LA COFINANCIACIÓN DEL MINISTERIO DE MINAS Y ENERGÍA Y DEL MEDIO AMBIENTE en el territorio de la jurisdicción donde han sido concedidas las respectivas licencias de las exploraciones mineras causantes de la erosión de las montañas y laderas, por ende de la escorrentía y de la sedimentación del RIO Y SUS AFLUENTES, dragado del que los lodos serán depositados en el lugar que determinen las autoridades ambientales involucradas".

Expediente No. 25000-23-27-000-2001-0479-01  
Acumulados Nos. 2000-0428, 2001-0122, 2001-0343  
Actor: GUSTAVO MOYA ÁNGEL Y OTROS  
Acción Popular

El considerando **El Dragado del Río Bogotá y de sus afluentes** de la sentencia de primera instancia señaló:

Dentro de la jurisdicción del distrito Capital, éste correrá a cargo de la EAAB como lo señala en la propuesta de Pacto de Cumplimiento y fuera de su perímetro urbano como en la Cuenca Alta y Baja correrá por cuenta de la Car con los aportes de la Nación-Ministerio de Minas y Energía y de Ambiente y Desarrollo Territorial en cuanto son éstos los que contribuyeron a la agravación de tal daño a consecuencia de las licencias para la exploración de grandes proyectos mineros.

Asiste razón al impugnante en cuanto la orden impartida no se ajusta a las competencias propias del Ministerio de Minas y Energía para financiar los proyectos por escorrentía y sedimentación del río y sus afluentes, lo cual corresponde a la Corporación Autónoma Regional de Cundinamarca -CAR- y quizás con el apoyo del Ministerio del Medio Ambiente, pues no hay disposición que asigne recursos al Ministerio de Minas y Energía para estos efectos.

Ahora bien, el hecho de otorgar licencias para la explotación de gran minería *per* se no lo hace responsable del daño ambiental, se requeriría establecer previamente que las licencias fueron otorgadas sin las exigencias de ley y especialmente sin el cumplimiento de los planes para prevenir el impacto ambiental, lo cual no se encuentra acreditado dentro del proceso, luego no podría exigirse la contribución para el pago del dragado del río Bogotá y sus afluentes por este concepto, puesto que previamente debe mediar una investigación que así lo determine. El cargo debe prosperar por esta razón.

Expediente No. 25000-23-27-000-2001-0479-01  
Acumulados Nos. 2000-0428, 2001-0122, 2001-0343  
Actor: GUSTAVO MOYA ÁNGEL Y OTROS  
Acción Popular

**5.- Se debe obligar al Ministerio de Minas y Energía a pagar incentivos a los demandantes?**

El Ministerio se encuentra en desacuerdo con el numeral undécimo de la parte resolutive de la sentencia porque no se le puede obligar a pagar incentivos a los demandantes que dentro del proceso no solicitaron su vinculación y, además, los 50 salarios mínimos legales vigentes extralimitan el tope máximo que el artículo 39 de la Ley 472 de 1998 señala.

En relación con el incentivo cabe anotar que la posición de la Sala en esta sentencia es la de no reconocer el incentivo acorde con los lineamientos establecidos en sentencia de unificación por la Sala Plena de la Corporación ya referida, razón por la cual la sentencia revocará el reconocimiento y pago del incentivo.

**7. APELACIÓN DEL FONDO NACIONAL DE REGALÍAS.**

A través de apoderado judicial y mediante escrito allegado al plenario el día 24 de febrero de 2005 (fls. 7086 a 7099), el apelante solicitó no ser condenado por cuanto no fue vinculado legalmente al proceso, se revoque el numeral 3 del literal v) de la parte resolutive de la sentencia, ya que el FNR, no tiene deudas pendientes por pagar con el Distrito Capital ni los municipios.

Igualmente, solicita que la sentencia guarde silencio o manifieste la ausencia de cualquier responsabilidad por acción u omisión del FONDO NACIONAL DE REGALÍAS, relativa a la contaminación del río Bogotá, porque al afirmar

Expediente No. 25000-23-27-000-2001-0479-01  
Acumulados Nos. 2000-0428, 2001-0122, 2001-0343  
Actor: GUSTAVO MOYA ÁNGEL Y OTROS  
Acción Popular

algunos municipios y el distrito Capital, el presunto desacato por parte del FONDO NACIONAL DE REGALÍAS, en las transferencias de los recursos, se ha debido llamar para controvertir dicha afirmación.

En estos términos advierte que hubo violación al debido proceso - derecho de contradicción y acceso a la administración de justicia - en cuanto el Fondo Nacional de Regalías no fue vinculado al proceso.

Problemas jurídicos a resolver:

***1.- Fue legalmente vinculado el Fondo Nacional de Regalías al proceso de acción popular?***

La Sala estima que si bien es cierto el Fondo Nacional de Regalías no fue vinculado formalmente al proceso, sí se hizo parte e intervino a través del Ministerio de Minas y Energía y del Departamento Nacional de Planeación, manifestando su interés y participando en las mesas de trabajo instaladas para lograr la recuperación del río Bogotá.

No se desconoció el debido proceso por cuanto el Fondo Nacional de Regalías puso de presente su posición frente a la acción popular y participó activamente en las mesas de trabajo propuestas por el Tribunal de instancia.

En estos términos no es viable aceptar los argumentos del recurrente y por lo tanto, se procederá a analizar los motivos de su inconformidad con la sentencia de instancia.

Expediente No. 25000-23-27-000-2001-0479-01  
Acumulados Nos. 2000-0428, 2001-0122, 2001-0343  
Actor: GUSTAVO MOYA ÁNGEL Y OTROS  
Acción Popular

**2.- ¿Es viable condenar por omisión al Fondo Nacional de Regalías por incumplimiento en el pago de las transferencias?**

El Fondo Nacional de Regalías solicita en primer término revocar el numeral 3 del literal v) de la sentencia y guardar silencio o manifestar la ausencia de cualquier responsabilidad por su acción u omisión.

El literal v) del numeral 3º de la sentencia, dispuso:

*v) El FONDO NACIONAL DE REGALÍAS y el MINISTERIO DE HACIENDA Y CRÉDITO PÚBLICO deberán dar cumplimiento a lo dispuesto en el punto 6.16.3. sobre las transferencias por concepto de regalías a los municipios y al Distrito Capital, debiendo pagar lo que hasta la presente adeudan a estos entes en los términos señalados en la parte motiva. Así también, dicho Ministerio deberá realizar las transferencias de Ley 715 correspondientes al 41% del Propósito General a los municipios de la Cuenca Alta, Media y Baja del RÍO BOGOTÁ, como al Distrito Capital.*

El numeral 6.16.3 de la sentencia señaló:

*"6.16.3. De otra parte, en orden a procurar el cumplimiento de las obligaciones del Distrito Capital como de los municipios, el FONDO NACIONAL DE REGALÍAS y EL MINISTERIO DE HACIENDA y CRÉDITO PÚBLICO deberán realizar las correspondientes reservas de los dineros por concepto de REGALÍAS, cancelando las que se causaron y que fueron objeto de reclamo por parte de los entes territoriales que hasta la presente se les adeudan, debiendo proceder a realizar las correspondientes apropiaciones en el presupuesto de gastos del FONDO NACIONAL DE REGALÍAS, para continuar cumpliendo de manera oportuna y sin dilaciones las transferencias por este concepto a los municipios como el Distrito Capital, por cuanto cualquier retardo incidirá en la ejecución de las obras que con tales recursos se proyecten".*

Expediente No. 25000-23-27-000-2001-0479-01  
Acumulados Nos. 2000-0428, 2001-0122, 2001-0343  
Actor: GUSTAVO MOYA ÁNGEL Y OTROS  
Acción Popular

Al respecto la Sala considera que la decisión adoptada en primera instancia de ordenar al Fondo girar los recursos oportunamente y que aún no se hubiesen transferido por concepto de regalías, más que una condena constituye una conminación que obedeció a la manifestación hecha por las entidades territoriales, razón por la cual el cargo no prospera.

**2.- La decisión del Tribunal viola los principios de coherencia macroeconómica y homeóstasis presupuestal?**

**Sobre los principios de coherencia macroeconómica y homeóstasis presupuestal.**

La Corte Constitucional ha precisado su alcance en los siguientes términos:

"(...) en el caso del principio de coherencia macroeconómica la norma se limita a señalar que el presupuesto debe ser "compatible" con las metas macroeconómicas fijadas por el Gobierno en coordinación con la Junta Directiva del Banco de la República. Concepto de compatibilidad que si bien enfatiza la necesaria relación entre el presupuesto público y la realidad económica valorada por el Gobierno en coordinación con el Banco de la República -a cuya junta directiva la Constitución asigna la calidad de autoridad monetaria cambiaria y crediticia - y las metas fijadas en el plan de desarrollo, deja un amplio margen de apreciación al Congreso de la República sobre las condiciones y supuestos en que dicha compatibilidad se configura. Ha de tenerse en cuenta así mismo que en el caso del principio de homeóstasis presupuestal la norma en la que éste se contiene se limita a señalar que el crecimiento real del Presupuesto de Rentas incluida la totalidad de los créditos adicionales de cualquier naturaleza, deberán guardar "congruencia" con el crecimiento de la economía, de tal manera que no genere desequilibrio macroeconómico. Se trata entonces de que se eviten excesos en la estimación de los

Expediente No. 25000-23-27-000-2001-0479-01  
Acumulados Nos. 2000-0428, 2001-0122, 2001-0343  
Actor: GUSTAVO MOYA ÁNGEL Y OTROS  
Acción Popular

*ingresos que puedan dar lugar a un déficit estructural, en cuanto al no corresponder dicha estimación con la realidad de la actividad económica que permita la generación de esos ingresos se produzca un desfase de tal magnitud que altere los grandes equilibrios que sirven de sustento al sistema económico. Ello no significa, empero que, deban siempre necesariamente coincidir el crecimiento real del Presupuesto de Rentas y el crecimiento de la economía. En esas circunstancias lo que debe examinarse es la coherencia macroeconómica desde una perspectiva de largo plazo.*

En este sentido no asiste razón al apelante en la medida en que la orden impartida por el Tribunal consistió en señalar que el Fondo Nacional de Regalías debe efectuar el desembolso oportuno de las regalías a los municipios, directamente, cuando a ello haya lugar e indirectamente, cuando se hayan validado los proyectos previamente registrados y acreditados por la autoridad competente.

La orden impartida en este sentido no desbordó los principios alegados por el impugnante.

La Sala estima importante en todo caso mencionar algunos conceptos relacionados con el Sistema Nacional de Regalías.

Por definición, en Colombia las regalías son una fuente importante de financiación para el desarrollo territorial que deben administrarse siguiendo los principios de transparencia, eficiencia, impacto, equidad y sostenibilidad. La atomización de las inversiones con cargo a estos recursos, su transitoriedad, la incertidumbre en su cuantificación y las debilidades en materia de ejecución, exigen que el Gobierno Nacional, en coordinación con las entidades territoriales, avance en la implementación

Expediente No. 25000-23-27-000-2001-0479-01  
 Acumulados Nos. 2000-0428, 2001-0122, 2001-0343  
 Actor: GUSTAVO MOYA ÁNGEL Y OTROS  
 Acción Popular

de estrategias que permitan mejores resultados en el uso de estos recursos<sup>235</sup>.

Las regalías son de dos tipos:

#### **Directas**

Son aquellas asignadas a las entidades territoriales en cuya jurisdicción se explotan recursos naturales no renovables, así como los puertos marítimos y fluviales por donde se transportan los recursos explotados o sus productos derivados.

#### **Indirectas**

Son aquellas no asignadas directamente a los departamentos y municipios productores, así como a los municipios portuarios, marítimos o fluviales por donde se transportan los recursos explotados o sus productos derivados, cuya administración corresponde al Fondo Nacional de Regalías. Sus recursos se destinan a la promoción de la minería, medio ambiente, y a financiar proyectos regionales de inversión definidos como prioritarios en los planes de desarrollo.

#### **En materia de Agua potable, alcantarillado y saneamiento básico**

Los recursos de las regalías buscan que por lo menos el 70% de los habitantes urbanos y rurales de la entidad territorial, cuenten con agua apta para el consumo humano, con el servicio de recolección de residuos, principalmente líquidos, por medio de tuberías y conductos (Decreto 475 de 1998). La cobertura, no se alcanza con la mera disponibilidad de las conexiones de acueducto; tampoco se alcanza si el agua no es apta para el consumo humano. Si el servicio de acueducto sólo se presta la mitad del tiempo, entonces la cobertura se reduce a la mitad. El servicio de alcantarillado incluye actividades como el transporte, el tratamiento y la disposición final de residuos.

---

<sup>235</sup> Fuente: "Recursos Naturales No Renovables, Generación de Regalías, Actualización de la Cartilla "Las Regalías en Colombia" (consultado internet página WEB.)

Expediente No. 25000-23-27-000-2001-0479-01  
Acumulados Nos. 2000-0428, 2001-0122, 2001-0343  
Actor: GUSTAVO MOYA ÁNGEL Y OTROS  
Acción Popular

Las entidades territoriales pueden realizar inversiones en este sector con cargo a recursos de regalías y compensaciones, para los siguientes casos:

- Infraestructura, en especial para ampliación de coberturas y reposición de redes, cuya vida útil se haya agotado, así como para la construcción de rellenos sanitarios y la clausura ambiental de botaderos a cielo abierto.
- Preinversión en diseños y estudios.
- Diseños e implantación de esquemas organizacionales para la administración y operación de los servicios de acueducto y alcantarillado.
- Construcción, ampliación y rehabilitación de sistemas de acueducto y alcantarillado, de sistemas de potabilización del agua y de tratamiento de aguas residuales, así como soluciones alternas de agua potable y de disposición de excretas.
- Saneamiento básico rural.
- Tratamiento y disposición final de residuos sólidos.
- Conservación de microcuencas que abastecen el sistema de acueducto, protección de fuentes y reforestación de dichas cuencas.
- Programas de macro y micromedición.
- Programas de reducción de agua no contabilizada.
- Equipos requeridos para la operación de los sistemas de agua potable y de saneamiento básico.

#### **En aseo**

Forman parte de este servicio las actividades de transporte, tratamiento, aprovechamiento y disposición final de residuos, principalmente sólidos. No se pueden financiar gastos de funcionamiento asociados a la prestación del servicio, sino para atender el servicio de recolección municipal de tales residuos.

Fuente: Gobernación de Casanare

Se pueden realizar inversiones en:

- Preinversión en diseños, estudios e interventorías
- Tratamiento y disposición final de residuos sólidos
- Equipos requeridos para la operación del servicio

Expediente No. 25000-23-27-000-2001-0479-01  
 Acumulados Nos. 2000-0428, 2001-0122, 2001-0343  
 Actor: GUSTAVO MOYA ÁNGEL Y OTROS  
 Acción Popular

### **Otras inversiones:**

El porcentaje restante de los recursos, tanto departamentos (40%) como municipios (25%) lo destinarán hasta el 5% para la interventoría técnica de los proyectos que se ejecuten con estos recursos, hasta un 5%, para gastos de operación y puesta en marcha, y el otro monto a inversión en proyectos prioritarios que estén contemplados en el plan de desarrollo del municipio o del departamento.

### **En salud**

La entidad territorial puede financiar:

- La prevención y control de enfermedades transmitidas por vectores y zoonosis.
- La promoción de estilos de vida saludable para la prevención y control de las enfermedades crónicas.
- La reducción del impacto en salud de la violencia e implementación de las políticas de salud mental y reducción de sustancias psicoactivas.
- Los eventos no cubiertos por el Plan Obligatorio de Salud (POS) de la población afiliada al Régimen Subsidiado y de la población pobre en lo no cubierto con subsidios a la demanda.

### **En educación**

Los recursos de regalías y compensaciones pueden, igualmente, destinarse a proyectos en el sector de educación superior, siempre y cuando estén establecidos como prioritarios en el respectivo plan de desarrollo y respeten las destinaciones necesarias para alcanzar los niveles de cubrimiento en materia de coberturas; cuando éstos no se hubiesen alcanzado.

**En saneamiento ambiental (Ley 141 de 1994, artículo 61, Decreto 1747 de 1995, artículo 10).**

Las entidades territoriales pueden financiar acciones y actividades que propendan por la recuperación, preservación, protección, manejo y conservación de los ecosistemas naturales. Las áreas en las cuales pueden invertir, son las siguientes:

- Ordenamiento territorial y ambiental
- Áreas de manejo especial
- Bosques, flora y fauna

Expediente No. 25000-23-27-000-2001-0479-01  
Acumulados Nos. 2000-0428, 2001-0122, 2001-0343  
Actor: GUSTAVO MOYA ÁNGEL Y OTROS  
Acción Popular

- Ecosistemas no boscosos, como páramos y arrecifes coralinos
- Ecosistemas acuáticos
- Recursos energéticos primarios
- Atmósfera
- Implementación de sistemas de monitoreo de la calidad ambiental
- Saneamiento básico
- Educación ambiental
- Suelos
- Protección del paisaje

Dentro de este contexto, resulta indispensable para el Proyecto de recuperación de la Cuenca del Río Bogotá contar con los recursos que por destinación específica deben ser asignados a los proyectos para tal fin, así como la destinación de los recursos que por vía directa corresponden a los municipios que integran la cuenca, asignando las respectivas responsabilidades acorde con la competencia y autoridades previstas para la administración de la Cuenca del río Bogotá. Luego no queda más que reiterar la obligación que corresponde a la entidad para poder asumir los compromisos para la ejecución de las obras requeridas para la recuperación y saneamiento de la Cuenca del río Bogotá y sus afluentes, incluido el Acuerdo de Cooperación para la construcción de la planta de tratamiento de aguas residuales de Canoas (Fase I y II) y su estación elevadora dentro del programa de saneamiento del río Bogotá, en el contexto de la región capital, Bogotá-Cundinamarca. (21 de febrero de 2011) y en virtud de lo dispuesto en el artículo 1º numeral 3º parágrafo quinto de la Ley 141 de 1994 modificado por el artículo 7º num. 3º de la Ley 756 de 2002<sup>236</sup>, que prevén una

---

<sup>236</sup>PARÁGRAFO 5o. <Parágrafo modificado por el artículo 7 de la Ley 756 de 2002. El nuevo texto es el siguiente:> Las dos terceras

Expediente No. 25000-23-27-000-2001-0479-01  
Acumulados Nos. 2000-0428, 2001-0122, 2001-0343  
Actor: GUSTAVO MOYA ÁNGEL Y OTROS  
Acción Popular

asignación con destinación específica dentro del presupuesto del Fondo Nacional de Regalías, para financiar programas y proyectos con el objetivo de descontaminar el río Bogotá.

Cabe anotar que el Fondo Nacional de Regalías, a través del Departamento Nacional de Planeación en los alegatos de conclusión puso de presente además que para el acceso a los recursos del FNR, las entidades territoriales como beneficiarias deben presentar los proyectos ante los respectivos ministerios según el sector al que correspondan, en los términos y con el cumplimiento de los requisitos exigidos en el Decreto 416 de 2007 para obtener su viabilidad, así como los Acuerdos Sectoriales que fijan los criterios de elegibilidad, viabilidad, y básicos para la presentación de los proyectos de inversión. Agrega que respecto de la ejecución de los recursos provenientes de las regalías y compensaciones, incluidos los mecanismos de contratación, son responsabilidad exclusiva de la entidad territorial beneficiaria y ejecutora de los recursos; el DNP no es parte contractual ni autoridad en la ejecución de los proyectos financiados con las asignaciones del FNR lo cual le permite ejercer la función de control y vigilancia a través de la interventoría administrativa y financiera.

Cabe destacar que en sus alegatos de conclusión refiere

---

partes (2/3) de los recursos asignados a la preservación del medio ambiente tendrán la siguiente destinación: (...)

3. No menos del veintiuno por ciento (21%) para financiar programas y proyectos para la descontaminación del Río Bogotá.

Expediente No. 25000-23-27-000-2001-0479-01  
Acumulados Nos. 2000-0428, 2001-0122, 2001-0343  
Actor: GUSTAVO MOYA ÁNGEL Y OTROS  
Acción Popular

el trámite del Proyecto de Inversión BPIN 1150030340000 "*Construcción de la Estación Elevadora de Aguas Residuales Canoas para el Distrito Capital de Bogotá*", e hizo las siguientes precisiones:

- Presentado por la Alcaldía Mayor de Bogotá el 29 de noviembre de 2011 al MAVDT, hoy Ministerio de Vivienda, Ciudad y Territorio y remitido como viable a la Dirección Nacional de Regalías con oficio anexo No. 20116630439932, radicado en el DNP el 2 de diciembre de 2011; la alcaldía propuso como entidad ejecutora a la EAAB ESP.
- Cumplidos los requisitos señalados en el Decreto 416 de 2007 y el Acuerdo 026 de 2004, fue aprobado por el Consejo Asesor de Regalías por valor de \$120.215000.000 con Acuerdo 071 de 28 de diciembre de 2011.
- El Proyecto consiste en la construcción de las obras de ingeniería y complementarias para el suministro, instalación y puesta en funcionamiento de la estación elevadora de aguas residuales de Canoas, contempla las siguientes actividades:

Estructura Central: un pozo circular de 65m de diámetro interno y 58m de profundidad, se contemplan dos compartimientos independientes, el primero destinado a un sistema de cribado con tres sistemas de rejillas separados de 10, 7 y 2.5 mm en el cual se ha previsto la implementación de un sistema de bypass que permite derivar el caudal hacia el túnel de emergencia. El segundo, es la estación de bombeo propiamente dicha, en el cual se han dispuesto en la primera etapa 5 bombas no sumergibles de pozo seco y de eje horizontal con una capacidad de bombeo de 5.5 m<sup>3</sup> /s cada una para un caudal bombeado de 22m<sup>3</sup>/s y con una bomba de suplencia. En una

Expediente No. 25000-23-27-000-2001-0479-01  
Acumulados Nos. 2000-0428, 2001-0122, 2001-0343  
Actor: GUSTAVO MOYA ÁNGEL Y OTROS  
Acción Popular

segunda y última etapa se tendrán en total 7 bombas de 5.5m<sup>3</sup>/s cada una para una capacidad máxima de bombeo de 38.5m<sup>3</sup>/s cada una para una capacidad máxima de bombeo de 38.5m<sup>3</sup>/s. La altura de bombeo es de 46m aproximadamente, con lo cual se entrega el caudal bombeado al nivel requerido por la futura PTAR Canoas para su funcionamiento.

Indica igualmente, que esta obra hace parte de un proyecto integral en el marco del programa de saneamiento del río Bogotá y el Acuerdo de Cooperación para la construcción de la Planta de Tratamiento de aguas residuales PTAR-Canoas (Fase I y II) y su estación elevadora.

El DNP ha realizado seguimiento al CONPES 3320 Estrategia Ambiental para el manejo del río Bogotá a través del SISCONPES<sup>237</sup>, razones éstas por las cuales siempre ha estado atenta a cumplir con las funciones previstas por la Constitución y la ley. Tampoco ha amenazado los derechos colectivos que en la acción popular se reclaman como vulnerados y ha cumplido a cabalidad con las cargas impuestas en la sentencia de primera instancia que fue objeto de impugnación por el DNP y el FNR en liquidación.

#### **8. APELACIÓN DEL DEPARTAMENTO NACIONAL DE PLANEACIÓN**

Mediante escrito visible a folios 7100 a 7122 del expediente, la entidad de planeación sustentó el recurso de apelación así:

---

<sup>237</sup>[http://sisconpes.dnp.gov.co/DocumentosConpesenSeguimiento/tabid/167/ctl/Card/mid/551/con\\_id/196/Default.aspx](http://sisconpes.dnp.gov.co/DocumentosConpesenSeguimiento/tabid/167/ctl/Card/mid/551/con_id/196/Default.aspx).

Expediente No. 25000-23-27-000-2001-0479-01  
Acumulados Nos. 2000-0428, 2001-0122, 2001-0343  
Actor: GUSTAVO MOYA ÁNGEL Y OTROS  
Acción Popular

El juez no encontró responsable por acción ni por omisión de la contaminación del río Bogotá al Departamento Nacional de Planeación, sin embargo impartió una orden con la finalidad de empezar a corregir o reparar el daño.

El numeral primero de la sentencia complementaria dispuso:

"PRIMERO: ADICIÓNASE la sentencia de 25 de agosto anterior en el proceso de la referencia, CONDENANDO en costas a favor de los accionantes, las cuales se liquidarán en su oportunidad y cargo por partes iguales de todos los entes demandados con excepción de EMCOCABLES S.A., de acuerdo con lo señalado en las motivaciones. Así mismo, para garantizar el cumplimiento de esta sentencia se dispone que las entidades públicas demandadas realicen las correspondientes apropiaciones dentro de sus respectivos presupuestos y en cuanto a las realizadas en la presente vigencia procédase en la forma dispuesta en la ley a realizar la correspondiente reserva con el fin de que las obras que no se hubiesen construido no pasen a vigencias expiradas y se cancele el respectivo gasto."

Problema jurídico:

***1.- El Tribunal extralimitó sus facultades al resolver la solicitud de complementar o adicionar la sentencia de primera instancia?***

El numeral primero de la sentencia complementaria del Tribunal de Primera instancia, (fl. 6402), dispuso:

"PRIMERO: ADICIÓNASE la sentencia de 25 de agosto anterior en el proceso de la referencia, CONDENANDO en costas a favor de los accionantes, las cuales se liquidarán en su oportunidad y cargo por partes iguales de todos los entes demandados con excepción de EMCOCABLES S.A., de acuerdo con lo señalado en las motivaciones. Así mismo, para garantizar el

Expediente No. 25000-23-27-000-2001-0479-01  
Acumulados Nos. 2000-0428, 2001-0122, 2001-0343  
Actor: GUSTAVO MOYA ÁNGEL Y OTROS  
Acción Popular

cumplimiento de esta sentencia se dispone que las entidades públicas demandadas realicen las correspondientes apropiaciones dentro de sus respectivos presupuestos y en cuanto a las realizadas en la presente vigencia procédase en la forma dispuesta en la ley a realizar la correspondiente reserva con el fin de que las obras que no se hubiesen construido no pasen a vigencias expiradas y se cancele el respectivo gasto".

Al respecto la Sala estima que de acuerdo con el análisis previo realizado de la condena en costas en acciones populares, no asiste razón al impugnante en cuanto ésta procede cuando el demandado es vencido y su cuantía corresponde a los gastos en que se ha incurrido en el proceso y honorarios de abogado que aparezcan acreditados en el mismo.

Sin embargo, cabe anotar en relación con la condena por omisión impuesta al DNP, que así el Departamento Nacional de Planeación no tenga el carácter de autoridad ambiental, ejerce funciones respecto del Sistema Nacional Ambiental y como tal tiene obligaciones a cargo que debe cumplir en los términos de la Ley 99 de 1993 y demás disposiciones que la complementan o desarrollan.

Las principales funciones del DNP, relacionadas con la política ambiental y el desarrollo sostenible (Decreto 195 de 2004) son: Elaborar planes de largo plazo sobre organización del Estado, planeación territorial del país y políticas ambientales y de desarrollo sostenible; Asesorar a la autoridad ambiental competente y a las Instituciones integrantes del SINA

Expediente No. 25000-23-27-000-2001-0479-01  
Acumulados Nos. 2000-0428, 2001-0122, 2001-0343  
Actor: GUSTAVO MOYA ÁNGEL Y OTROS  
Acción Popular

en la conformación y puesta en marcha del Sistema de Información Ambiental para Colombia.

Así, el Departamento Nacional de Planeación tiene como objetivos fundamentales la preparación, el seguimiento de la ejecución y la evaluación de resultados de las políticas, planes generales, programas y proyectos del sector público y el diseño de las políticas en materia de macro estructura del Estado.

Luego desconocer el papel preponderante del Departamento Nacional de Planeación en materia ambiental sería como desarticular la estructura del Estado y los controles que deben ejercerse por las autoridades y órganos técnicos del mismo.

**2.- Era viable modificar los acuerdos hechos en las mesas de trabajo?**

Solicita el Departamento Nacional de Planeación revocar el numeral tercero literal x) en el sentido de restringir nuevos estudios ambientales sin que exista autorización de la Mesa Regional de la cuenca del río Bogotá y los demás sujetos que se mencionan en la parte motiva porque atropella la Constitución Política en lo atinente al régimen Económico y de Hacienda Pública.

El literal x del numeral tercero ordenó:

*x) Todos los entes involucrados en la presente acción deberán dar cumplimiento a lo dispuesto en el punto 6.5.4.7. respecto a la autorización por la MESA REGIONAL DE LA CUENCA DEL RÍO BOGOTÁ Distrito Capital-Departamento de Cundinamarca y del Tribunal para adelantar nuevas investigaciones teniendo en cuenta la innovación*

Expediente No. 25000-23-27-000-2001-0479-01  
Acumulados Nos. 2000-0428, 2001-0122, 2001-0343  
Actor: GUSTAVO MOYA ÁNGEL Y OTROS  
Acción Popular

*tecnológica que se presente y que contribuya al saneamiento del RÍO BOGOTÁ y del EMBALSE DEL MUÑA.*

A pesar de que el fallo refiere el numeral 6.5.4.7. en realidad reseña el contenido del numeral 6.5.8.2., según el cual:

"6.5.8.2. De esa manera, sólo cuando el Tribunal con la aprobación de la MESA REGIONAL DE LA CUENCA DEL RIO BOGOTÁ, autorice nuevas investigaciones y estudios que demuestren en forma fehaciente que la tecnología impone el desarrollo de otras obras que contribuyan en forma más acelerada a restaurar el medio ambiente con igual monto de inversión que el que en este proceso han puesto de presente cada uno de los entes públicos, ora superior, pero que en todo caso comprenda un mayor beneficio (relación costo-beneficio) y que por sobretodo implique una sola inversión en la que cada uno de los entes que participen en ella puedan obtener sus mejores logros y beneficios, podrá haber lugar a la modificación de los pactos aquí propuestos. Sin embargo, el avance de la tecnología no podrá servir de pretexto para justificar la inejecución de las obras propuestas, puesto que no será sobre la marcha de su realización que se pida la autorización para la modificación a las mismas".

La Sala estima que el alcance dado por el impugnante a la decisión no corresponde a su contenido, puesto que si se realizaron acuerdos con las entidades en relación con la recuperación de la Cuenca del río Bogotá las modificaciones a los mismos no podrán hacerse *motu proprio* sino que requieren de autorización previa, sin que ello implique *per se*, una afectación del patrimonio de la entidad pues igualmente tendrá que tener en cuenta el presupuesto de la entidad y la naturaleza de las modificaciones a realizar y siempre en aras de obtener un mayor beneficio, disminuir costos y atender a nuevas tecnologías. El cargo no prospera.

Expediente No. 25000-23-27-000-2001-0479-01  
Acumulados Nos. 2000-0428, 2001-0122, 2001-0343  
Actor: GUSTAVO MOYA ÁNGEL Y OTROS  
Acción Popular

**3.- Afecta la política crediticia del país ordenar el endeudamiento de las entidades descentralizadas del nivel territorial y que los créditos sean asumidos por la Nación?**

Solicita el Departamento Nacional de Planeación revocar el numeral quinto, relativo al aval y pago de créditos por parte de la Nación del crédito de la Empresa de Acueducto y Alcantarillado de Bogotá, toda vez que el Decreto 610 de 2002, relativo al endeudamiento de las entidades descentralizadas del nivel territorial, impide al juez ordenar esa clase de endeudamiento, tampoco podía determinar un aval en cabeza de la Nación y mucho menos que los créditos fueran asumidos por ésta, pues con ello se afecta gravemente la política crediticia del país.

La sentencia en la parte pertinente señala:

**QUINTO:** Así mismo, las obras de que trata el literal e) del ordinal anterior, se construirán en el siguiente término y con cargo a las siguientes entidades y recursos: **a)** Para los efectos de la construcción del interceptor TUNJUELO - CANOAS para el cual la EAAB no lo tiene proyectado dentro de las tarifas, el DISTRITO CAPITAL deberá realizar una transferencia de recursos superior al 30% del 41% del Propósito General, de tal forma que alcance a cubrir su terminación; **b)** La misma transferencia deberá continuar haciendo una vez se haya construido dicho interceptor dentro del plazo convenido en la propuesta de pacto y aprobado por el tribunal, en un porcentaje que no podrá ser inferior al 50% del 41% del Propósito General, con destino a la construcción de la Planta de Tratamiento de Canoas y para su posterior operación y mantenimiento, hasta tanto la EAAB pueda asumir su costo con cargo a las tarifas; Para tales efectos se conminará a la NACIÓN - MINISTERIO DE HACIENDA Y CRÉDITO PÚBLICO para que cumpla en forma oportuna Y SIN DILACIONES

Expediente No. 25000-23-27-000-2001-0479-01  
Acumulados Nos. 2000-0428, 2001-0122, 2001-0343  
Actor: GUSTAVO MOYA ÁNGEL Y OTROS  
Acción Popular

con la obligación de transferir al Distrito los recursos de la Ley 715 del Propósito General; **c)** Siendo insuficientes los anteriores recursos para la construcción de la PLANTA ELEVADORA DE CANOAS, LA PLANTA DE TRATAMIENTO DE CANOAS y el interceptor CANOAS ALICACHÍN, su costo debe ser cubierto no solo con las transferencias de ley 715 por parte del Distrito acabada de señalar, sino con las transferencias que la CAR debe hacer al DISTRITO CAPITAL por el 50% del Predial, previa deducción de los costos de ampliación de la PTAR SALITRE, y en lo que reste, serán los recursos por tasa retributiva incluida en las tarifas de la empresa prestataria del servicio proyectados al año 2009, los que deben quedar afectos para su construcción para lo cual deberá constituirse un FONDO CUENTA con todos los recursos que en forma oportuna deberán trasladar las entidades involucradas. En ese orden, teniendo en cuenta la magnitud de las obras que la EAAB está emprendiendo y debe ejecutar en un lapso que no puede sobrepasar al año 2009, se requiere para la aprobación de los correspondientes créditos, que la NACIÓN preste su aval a la empresa en orden a obtenerlos, que como se previó para el Contrato 015 pueden acudir a la pignoración de tales rentas proyectadas en los años según el precio de las mismas, que permita la pronta consecución de los recursos con los que deben ejecutarse las obras. El pago de los réditos de la deuda se hará con cargo a los recursos de la Nación teniendo en cuenta que todas las entidades demandadas han cohonestado con su actuar omisivo a la agravación del daño ecológico como ampliamente ha quedado analizado en esta sentencia, por lo que todas deben contribuir con sus recursos a la restauración de las fuentes de agua afectadas tal y como lo prevé el artículo 34 de la Ley 472 de 1998; **d)** De igual manera, para efectos de la operación y el mantenimiento de la PTAR CANOAS se hará con cargo a los recursos por Ley 715 del Distrito Capital que perciba después del año 2009, y con las transferencias del sector eléctrico a la CAR y a los municipios, especialmente Sibaté que recibe un porcentaje mayor que los demás, de la siguiente manera: El Distrito Capital aportará el 50% del 41% del Propósito General, la suma que

Expediente No. 25000-23-27-000-2001-0479-01  
 Acumulados Nos. 2000-0428, 2001-0122, 2001-0343  
 Actor: GUSTAVO MOYA ÁNGEL Y OTROS  
 Acción Popular

*reste del precio de la operación descontado dicho porcentaje será cubierta por partes iguales por la CAR, el MUNICIPIO DE SIBATÉ y por los municipios que reciben las transferencias, considerados estos últimos como una sola parte para efectos de dividir en tres partes el saldo; e) Una vez pagada la deuda por concepto de la construcción de la PTAR CANOAS, la EAAB asumirá su operación y mantenimiento con cargo a las tarifas como lo prevé el artículo 16 de la Resolución CRA 287 de 2004 y con el apoyo de los recursos acabados de señalar.*

Cuestiona el apelante la forma como el Tribunal dispuso recaudar los recursos para las obras concertadas y en primer término respecto de la Nación dispuso que ésta transfiriera los recursos de la Ley 715 del Propósito General.

La Ley 715, que consagra el Sistema General de Participaciones disponía en el artículo 3º:

"ARTÍCULO 3. El Sistema General de Participaciones estará conformado así: (...)

3.3. Una participación de propósito general que incluye los recursos para agua potable y saneamiento básico, que se denominará participación para propósito general (...)".

Esta disposición fue modificada por la Ley 1176 de 2007, en los siguientes términos:

ARTÍCULO 3o. CONFORMACIÓN DEL SISTEMA GENERAL DE PARTICIPACIONES. <Artículo modificado por el artículo 1 de la Ley 1176 de 2007. El nuevo texto es el siguiente:> El Sistema General de Participación estará conformado así:  
 (...)

3. Una participación con destinación específica para el sector agua potable y saneamiento básico, que se

Expediente No. 25000-23-27-000-2001-0479-01  
Acumulados Nos. 2000-0428, 2001-0122, 2001-0343  
Actor: GUSTAVO MOYA ÁNGEL Y OTROS  
Acción Popular

denominará participación para agua potable y saneamiento básico.

4. Una participación de propósito general

Ello significa que las normas vigentes al momento de proferir sentencia de primer grado no existía una destinación específica sino que del renglón de participación con propósito general se incluían los recursos para agua potable y saneamiento básico, hoy incluso el legislador ya estableció un renglón exclusivo de asignación de recursos con destinación específica para el sector de agua potable y saneamiento básico, lo que significa que el Tribunal no excedió su competencia pues determinó que estos recursos debían ser destinados para cumplir con el propósito del saneamiento de la Cuenca del río Bogotá. Lo único que solicitó fue que la Nación efectuara las transferencias por concepto de Ley 715 de manera oportuna para poder cumplir con los cometidos en materia ambiental.

En cuanto a la condena a la Nación a pagar con sus recursos los réditos de la deuda en los términos previstos en el artículo 34 de la Ley 472 de 1998, cabe anotar que de acuerdo con esta disposición el legislador previó la posibilidad de que las entidades públicas que contribuyan con su actitud omisiva con la afectación del derecho colectivo están obligadas a contribuir con la reparación del mismo. Como en el proceso se tiene establecido que las entidades del orden nacional al no cumplir con sus obligaciones legales para evitar la contaminación del río Bogotá y sus afluentes dentro del marco de su competencia, deberán responder, sujetos a la disposición presupuestal y con sus propios recursos a la solución

Expediente No. 25000-23-27-000-2001-0479-01  
Acumulados Nos. 2000-0428, 2001-0122, 2001-0343  
Actor: GUSTAVO MOYA ÁNGEL Y OTROS  
Acción Popular

del problema que no solo atañe al Departamento, al D.C. y a los municipios, sino también a la Nación.

Tampoco es de recibo el argumento del apelante según el cual el Tribunal de instancia excedió su competencia por expedir una orden con desconocimiento del decreto 610 de 2002, por cuanto este decreto regula lo relativo a la capacidad de pago de las entidades descentralizadas del orden territorial, que no puede entenderse desconocida por el Tribunal de instancia ya que la sentencia se limita a precisar la forma como cada una de las entidades deberá participar con sus recursos en los proyectos a desarrollar para lograr la descontaminación del río Bogotá y de sus afluentes. El cargo no prospera.

**9. APELACIÓN DEL DEPARTAMENTO TÉCNICO ADMINISTRATIVO DEL MEDIO AMBIENTE - DAMA.**

El Subdirector de Gestión Judicial de la Alcaldía Mayor de Bogotá sustentó el recurso de apelación interpuesto contra la sentencia proferida el 25 de agosto de 2004, circunscribiendo el mismo al reconocimiento del incentivo.

En estos términos se analiza el problema jurídico planteado:

***1.- Es procedente reconocer el incentivo en la presente acción popular?***

Al respecto la Sala considera que como se señaló en acápite anterior, el incentivo no será reconocido por cuanto fue eliminado del ordenamiento jurídico y así se

Expediente No. 25000-23-27-000-2001-0479-01  
 Acumulados Nos. 2000-0428, 2001-0122, 2001-0343  
 Actor: GUSTAVO MOYA ÁNGEL Y OTROS  
 Acción Popular

dispuso por la Sala Plena de esta Corporación en la sentencia referida.

**10. APELACIÓN DE LA ASOCIACIÓN DE CURTIDORES DE VILLAPINZÓN-ACURTIR.**

El apoderado judicial de Acurtir al sustentar el recurso de apelación interpuesto manifestó su inconformidad con la sentencia con los siguientes cuestionamientos:

***1.- ¿Se desconoce la propiedad privada y el derecho de defensa por ordenar a la asociación de ACURTIR contribuir con el programa de producción más limpia para los municipios que realizan esta actividad industrial y que generan contaminación para la cuenca del río Bogotá?***

El literal 11) del numeral tercero de la sentencia dispuso:

11) En orden a propiciar y controlar los procesos de producción más limpia de las curtiembres de VILLAPINZÓN y CHOCONTÁ, los MUNICIPIOS DE VILLAPINZÓN y de CHOCONTÁ con cargo a sus recursos y/o con la coordinación y cofinanciación del DEPARTAMENTO DE CUNDINAMARCA, la BENEFICENCIA DE CUNDINAMARCA, de la CORPORACIÓN AUTÓNOMA DE CUNDINAMARCA, quien tendrá bajo su responsabilidad la dirección y el cumplimiento de esta orden, la que también con cargo a su presupuesto gestionará los programas de producción más limpia dando prioridad a esta problemática, y con los buenos oficios de los MINISTERIOS DE AMBIENTE VIVIENDA Y DESARROLLO TERRITORIAL Y DE COMERCIO EXTERIOR, dentro del término máximo de un año (1) contado a partir de la notificación de la presente sentencia, deberán cofinanciar todas las obras de infraestructura que requieran dichos procesos de producción más limpia bajo - si es del caso- el sistema de COOPERACIÓN DEL GREMIO DE LAS CURTIEMBRES, según las directrices trazadas en la parte motiva de esta sentencia, procurando para aquellos que se encuentran con necesidades básicas insatisfechas en atención a la precariedad de sus patrimonios y que se ubican dentro de la ZONA DE RONDA DEL RÍO BOGOTÁ, subsidiarles los planes de vivienda en un término que no podrá sobrepasar de un año contado a partir de la notificación de este fallo. Por su parte, aquellos, deberán acatar las órdenes de la autoridad ambiental en lo tocante a los programas de producción más limpia, so pena

**Expediente No. 25000-23-27-000-2001-0479-01**  
**Acumulados Nos. 2000-0428, 2001-0122, 2001-0343**  
**Actor: GUSTAVO MOYA ÁNGEL Y OTROS**  
**Acción Popular**

de su exclusión de la cooperativa y el desalojo inmediato. De otro lado, quienes no se encuentren dentro de este último grupo, esto es los que de acuerdo con su declaración de renta estén en capacidad de costear sus propias viviendas deberán ser desalojados de la zona de ronda en el término máximo de seis (6) meses contados a partir de la notificación de esta sentencia; pero deberán ser incluidos dentro de los Programas de Producción Más Limpia de que trata este aparte. En ningún caso habrá lugar a la compra o indemnización de predios que se encuentren dentro de la zona de ronda por tratarse de bienes de propiedad de la Nación y de uso público que ilegalmente fueron invadidos a sabiendas por los que en ellos se encuentran viviendo y adelantando sus procesos de producción de curtición y de los cuales se han usufructuado en detrimento del medio ambiente;

Considera la Sala que la orden impartida en la sentencia contenida en el literal 11) del numeral tercero se orienta a propiciar y controlar los procesos de producción más limpia de las curtiembres de los municipios de Villapinzón y Chocontá, con cargo a sus recursos y con la coordinación y cofinanciación del Departamento de Cundinamarca, la Beneficencia de Cundinamarca y con el apoyo del Ministerio de Medio Ambiente y de Comercio Exterior bajo el sistema de cooperación del Gremio de las Curtiembres, sin que haya lugar a la compra de predios o indemnización en la zona de ronda por tratarse de bienes de propiedad de la Nación y de uso público que se encuentran invadidos ilegalmente y en los cuales se adelantan procesos de curtición de los cuales se han usufructuado, en detrimento del medio ambiente.

La decisión proferida por el Tribunal no resulta violatoria del derecho constitucional al debido proceso porque dentro de la política ambiental está prevista la de Producción más Limpia que implica una actividad de las

Expediente No. 25000-23-27-000-2001-0479-01  
Acumulados Nos. 2000-0428, 2001-0122, 2001-0343  
Actor: GUSTAVO MOYA ÁNGEL Y OTROS  
Acción Popular

autoridades ambientales para recuperar los predios de la ronda del río que son, por virtud de la ley, bienes de uso público. No puede en consecuencia hablarse de un desconocimiento de derechos fundamentales y de la propiedad privada por cuanto ésta se garantiza siempre y cuando se haya obtenido con arreglo a las leyes civiles. No puede alegar el impugnante que se le reconozcan unos derechos a quienes de manera ilegal explotan una actividad comercial. Es claro que la orden impartida por el Tribunal de instancia es para que las autoridades ambientales competentes ejerzan sus competencias para recuperar la ronda del río, que implica una recuperación del espacio público obviamente que sujeto a los procedimientos de ley, pero debiendo precisar que como lo advirtió el Tribunal no hay lugar a indemnizaciones cuando se han apropiado terrenos de uso público que por su naturaleza son inalienables e imprescriptibles y no pueden adquirirse en consecuencia ni por haberse explotado por largos períodos de tiempo.

Tampoco puede predicarse respecto de los habitantes de la ronda del río haberse otorgado bajo el concepto de confianza legítima porque el hecho de que la autoridad ambiental haya omitido adoptar oportunamente los correctivos de rigor, no significa que se haya otorgado un derecho que impacta los derechos colectivos y afecta el interés general.

Sólo en la medida en que medie un derecho de propiedad podría adelantarse el procedimiento de expropiación, en aras del interés general, debiendo reiterar que la

Expediente No. 25000-23-27-000-2001-0479-01  
Acumulados Nos. 2000-0428, 2001-0122, 2001-0343  
Actor: GUSTAVO MOYA ÁNGEL Y OTROS  
Acción Popular

invasión del espacio público no constituye un derecho que legalmente pueda ser reconocido o amparado.

En estos términos, el Tribunal se limita a impartir una orden con miras a que las autoridades ambientales cumplan con el ordenamiento jurídico, sin que ello implique afectación de derechos fundamentales o del derecho a la propiedad.

Tampoco puede predicar la asociación Acurtir que recibió una orden a pesar de no haber sido vinculada al proceso porque fue tomada en cuenta y participó de manera voluntaria en desarrollo del proceso. Controvertir la prueba frente a un hecho notorio que es la actividad que desarrollan los miembros de la asociación de curtidores resulta irrelevante, pues lo que se pretende es que los curtidores contribuyan con la descontaminación del río Bogotá a través del programa de Producción más Limpia, que involucra a todos los agentes contaminantes sin que sea necesaria su vinculación al proceso.

**11. APELACIÓN DE LA COMPAÑÍA BOGOTANA DE AGUAS Y SANEAMIENTO SUEZ  
LYONNAISE DES EAUX DEGREMONT E.S.P. S.A. -BAS-**

Mediante escrito allegado al plenario, el apoderado judicial de la sociedad sustentó el recurso y como motivos de inconformidad plantea los siguientes cuestionamientos:

***1.- Se debe revocar parcialmente el numeral 9 de la sentencia de primera instancia en cuanto dispuso compulsar copias para que se investiguen las conductas desplegadas en ejecución del contrato 015 de 1994 y que pudieron dar lugar a un detrimento patrimonial?***

Consideró el Tribunal de instancia al respecto:

Expediente No. 25000-23-27-000-2001-0479-01  
Acumulados Nos. 2000-0428, 2001-0122, 2001-0343  
Actor: GUSTAVO MOYA ÁNGEL Y OTROS  
Acción Popular

"6.22.6 (...) la Sala estima que la CONTRALORÍA GENERAL DE LA REPÚBLICA como la FISCALÍA GENERAL DE LA NACIÓN deberán investigar la responsabilidad fiscal, como la de tipo penal que tanto al concesionario como al interventor del contrato y a los funcionarios del Distrito que lo suscribieron, como a las autoridades que dieron la licencia, no obstante la existencia de unos estudios serios, lo que ha ocasionado un detrimento patrimonial que mes tras mes y año tras año ha venido sufriendo la CAR como el Distrito Capital pues con cargo a sus recursos se ha pagado la inversión como la operación y mantenimiento de la PTAR SALITRE (razón ésta por la que se estima que tales acciones no han prescrito debido a la continuidad en la ejecución del contrato y el pago de las mesadas por la operación), la cual desde que se diseñó y se construyó ya era insuficiente para tratar el efluente de las aguas contaminadas del RIO BOGOTÁ por lo que se ordenará compulsar la copia de esta sentencia como del documento que obra entre los folios 4.653 a 4683 del cuaderno 8 anexo al cuaderno 1 principal, como también del contrato 015 y demás documentos pertinentes, para lo cual se requiere al DISTRITO CAPITAL Y A LA EMPRESA DE ACUEDUCTO Y ALCANTARILLADO DE BOGOTÁ para que dentro del término de ejecutoria de esta sentencia aporte con destino a este proceso copia del aludido estudio de la EPAM que no obra en el expediente(...)".

No es viable en esta instancia entrar a discurrir sobre si hubo o no detrimento patrimonial en la celebración y ejecución del contrato 015, es la autoridad competente la que deberá definir si existió tal irregularidad, motivo por el cual se dispuso compulsar copias tanto a la Contraloría General de la República como a la Fiscalía General de la Nación, para que en ejercicio de sus competencias determinen si se incurrió por parte de la sociedad impugnante en un detrimento patrimonial que haya generado afectación del erario público, con las consecuencias fiscales o penales a que haya lugar. El remitir copias a estas autoridades no implica que se esté

Expediente No. 25000-23-27-000-2001-0479-01  
Acumulados Nos. 2000-0428, 2001-0122, 2001-0343  
Actor: GUSTAVO MOYA ÁNGEL Y OTROS  
Acción Popular

endilgando la comisión de una conducta penal o fiscal, porque se reitera, ello corresponde establecerlo a los organismos competentes.

Fue el asesor técnico de la Procuraduría General de la Nación quien consideró que probablemente existieron algunas irregularidades y que en efecto estima el Tribunal podrían ser susceptibles de investigación por parte de las autoridades respectivas. Razón por la cual el cargo no tiene vocación de prosperidad.

**12. APELACIÓN DE LA EMPRESA DE ACUEDUCTO Y ALCANTARILLADO DE BOGOTÁ  
- E.A.A.B. E.S.P.**

El apoderado de la empresa distrital presentó recurso de apelación contra la sentencia de instancia y lo sustentó de la siguiente forma:

- La Empresa de Acueducto y Alcantarillado de Bogotá, E.S.P. se aparta de lo ordenado en el numeral 5° de la parte resolutive de la sentencia de instancia, por cuanto la empresa es la entidad pública que debe asumir la responsabilidad de prestar los servicios públicos de acueducto y alcantarillado a los habitantes del Distrito Capital, además contribuye con su esfuerzo financiero e institucional en el tratamiento de las aguas residuales que se producen en la capital; por su experiencia y dimensión colabora con la prestación del servicio en algunos municipios vecinos de Bogotá, por lo que su posición siempre ha sido proactiva y constructiva.

Expediente No. 25000-23-27-000-2001-0479-01  
Acumulados Nos. 2000-0428, 2001-0122, 2001-0343  
Actor: GUSTAVO MOYA ÁNGEL Y OTROS  
Acción Popular

- La decisión del Tribunal de adelantar la construcción de la Planta de tratamiento de Aguas Residuales en Canoas para el año 2009, no puede ser compartida por la empresa pues ello significa poner en peligro la viabilidad técnica y financiera de esta solución integral.

Además, para iniciar las obras de la planta se requiere previamente terminar el estudio de diseño de la Planta de Tratamiento de Canoas pues cuenta apenas con estudios de predimensionamiento, para luego poder solicitar la licencia ambiental así como adelantar las gestiones ante el Municipio de Soacha para obtener los permisos correspondientes.

El tiempo mínimo que se requiere para hacer todo lo descrito en la decisión, acelerando al máximo los tiempos sería de 15 años contados a partir de la ejecutoria de la sentencia.

Los plazos previstos en la sentencia para la construcción de la planta para el año 2009 no es un término prudencial tal y como está dispuesto en el artículo 34 de la Ley 472 de 1998.

Ahora bien, si la Corporación considera que la construcción de los interceptores ordenados, requieren entrar a operar al mismo tiempo que la planta, deberá ajustar los límites temporales para su construcción.

Expediente No. 25000-23-27-000-2001-0479-01  
Acumulados Nos. 2000-0428, 2001-0122, 2001-0343  
Actor: GUSTAVO MOYA ÁNGEL Y OTROS  
Acción Popular

- Estima la Empresa que resulta imposible acatar la orden impartida en relación con la separación de los alcantarillados, pues éstos en la mayoría de los casos se encuentran combinados desde el interior de las casas y, significaría volver a construir la ciudad. En este sentido, anotó que, la apelación del numeral 4º, literal b), se hace necesaria por razones de conexidad técnica, toda vez que ellos se articulan íntimamente con la construcción de los interceptores.
- Sobre la distribución de las cargas financieras, señala que la carga impuesta a la empresa pone en grave riesgo la estabilidad económica de la misma, además reduciría la posibilidad de llevar a cabo el Plan de Obras propuesto en el pacto de cumplimiento.
- Se encuentra en la obligación de solicitar una modificación al cronograma de inversión definido en la providencia, extendiéndolo más allá del año 2012, dada la magnitud de los recursos y de las obras necesarias para el cumplimiento del mismo.
- Añadió que en caso de ejecutarse las obras con los recursos y fechas que ordena el fallo sin que exista un cierre financiero resultante del consenso interinstitucional de aportes financieros para incorporar dichos montos en las proyecciones, se pondrá en muy grave riesgo la sostenibilidad financiera y operacional del Acueducto de Bogotá, con las graves implicaciones para la sociedad

Expediente No. 25000-23-27-000-2001-0479-01  
Acumulados Nos. 2000-0428, 2001-0122, 2001-0343  
Actor: GUSTAVO MOYA ÁNGEL Y OTROS  
Acción Popular

derivadas de la pérdida de capacidad de la Empresa para continuar prestando los servicios básicos.

- Arguyó que la aplicación de la sentencia ante la imprecisión de instancias generadoras de recursos ubican el tema de las aguas residuales en la indefinición de un marco tarifario.
- Por las anteriores consideraciones, la E.A.A.B. aseveró que no es equitativa la forma como la sentencia apelada señala que la Nación debe aportar recursos para las obras que no están financiadas.

Sobre la apelación planteada por la EAAB, procede realizar un análisis de fondo de carácter técnico y financiero, pues como puede advertirse la Empresa no ha cumplido en su integridad con la propuesta planteada en primera instancia para la construcción de la Planta de Tratamiento de aguas residuales de Canoas. Para el efecto se estudiarán los documentos que obran en el proceso y que harán parte de la solución integral para la descontaminación de la Cuenca del Río Bogotá (alta, media y baja), con la determinación de los aspectos técnicos a que habrán de someterse las entidades responsables, así como con la procedencia de los recursos con los que han de contar para su ejecución y los términos en los cuales habrán de ejecutarse las obras.

Así se deberá tener en cuenta la viabilidad de la sentencia en los aspectos de orden técnico y financiero que pone de presente la Empresa:

Expediente No. 25000-23-27-000-2001-0479-01  
Acumulados Nos. 2000-0428, 2001-0122, 2001-0343  
Actor: GUSTAVO MOYA ÁNGEL Y OTROS  
Acción Popular

1.- Establecer el estado actual del estudio de diseño de la Planta de Tratamiento de Canoas; los avances en la solicitud de la licencia ambiental, así como de las gestiones realizadas ante el Municipio de Soacha para obtener los permisos correspondientes.

2.- Precisar el tiempo mínimo requerido para ejecutar la propuesta de solución integral de carácter técnico para la descontaminación del Río Bogotá y sus afluentes, con los respectivos cronogramas.

3.- Definir los plazos para exigir el cumplimiento en la ejecución de las obras, con el objeto de que el término resulte prudencial tal y como está dispuesto en el artículo 34 de la Ley 472 de 1998.

4.- Establecer la viabilidad de la separación de los alcantarillados, pues éstos en la mayoría de los casos se encuentran combinados desde el interior de las viviendas y si en efecto ello significa volver a construir la ciudad. En este sentido, anotó que la apelación respecto del numeral 4º, literal b), se hace necesaria por razones de conexidad técnica, toda vez que ellos se articulan íntimamente con la construcción de los interceptores.

5.- Verificar la carga financiera impuesta a la empresa para que no se ponga en riesgo la estabilidad económica de la misma, ni se reduzca la

Expediente No. 25000-23-27-000-2001-0479-01  
Acumulados Nos. 2000-0428, 2001-0122, 2001-0343  
Actor: GUSTAVO MOYA ÁNGEL Y OTROS  
Acción Popular

posibilidad de llevar a cabo el Plan de Obras propuesto en el pacto de cumplimiento.

6.- Establecer un cronograma de inversión, dada la magnitud de los recursos y de las obras necesarias para el cumplimiento del proyecto.

7.- Establecer si existe un cierre financiero resultante del consenso interinstitucional de aportes financieros para incorporar dichos montos en las proyecciones, de tal manera que no se ponga en riesgo la sostenibilidad financiera y operacional del Acueducto de Bogotá.

8.- Definir un marco tarifario y las instancias generadoras de recursos en relación con el tema del manejo de las aguas residuales de origen doméstico.

9.- Definir en qué porcentaje deben concurrir con recursos la Nación, el Departamento, los municipios de la cuenca y el D.C.

Estos aspectos serán objeto de análisis en el estudio técnico y financiero, efectuados para la solución integral que se propone en la sentencia.

### **13. APELACIÓN DE LA CORPORACIÓN AUTÓNOMA REGIONAL DE CUNDINAMARCA - CAR.**

El apoderado judicial de la CAR en escrito visible a folios 6658 a 6697 del expediente, planteó los temas objeto de impugnación, la Sala procede a resolver los problemas jurídicos planteados por el apelante:

Expediente No. 25000-23-27-000-2001-0479-01  
Acumulados Nos. 2000-0428, 2001-0122, 2001-0343  
Actor: GUSTAVO MOYA ÁNGEL Y OTROS  
Acción Popular

**1.- Los acuerdos logrados en la primera instancia constituyen "Pacto de cumplimiento"?**

Asiste razón al actor en cuanto que dada la naturaleza jurídica del Pacto de Cumplimiento, como se dejó planteado anteriormente, **no puede ser parcial**, puesto que no es procedente la protección parcial de un derecho o interés colectivo, pues ello haría nugatoria su protección como tal y perdería su carácter garantista.

Tampoco sería viable que frente a un proceso se profieran sentencias parciales y sentencias definitivas, puesto que de conformidad con la regulación de la acción popular si el juez aprueba junto con las partes el acuerdo logrado éste termina con una sentencia susceptible de control de legalidad en otra instancia, pero pone fin al proceso. En el presente caso el hecho de haber aprobado unos acuerdos o compromisos efectuados por algunas autoridades no dio lugar a la terminación del proceso sino a que se continuara con el mismo, más aún cuando las modificaciones hechas por el Tribunal de instancia no fueron aprobadas por quienes inicialmente presentaron la propuesta de acuerdo o compromiso y que de manera errada denominaron "pacto de cumplimiento".

Sin lugar a dudas las decisiones adoptadas por el Tribunal de instancia, previo estudio de las posibles alternativas para lograr el amparo de los derechos colectivos relacionados con la contaminación de la Cuenca del río Bogotá, se adoptaron con miras a prevenir un daño mayor e ir tomando los correctivos necesarios para dar

Expediente No. 25000-23-27-000-2001-0479-01  
Acumulados Nos. 2000-0428, 2001-0122, 2001-0343  
Actor: GUSTAVO MOYA ÁNGEL Y OTROS  
Acción Popular

una solución integral frente a los múltiples factores que inciden en la problemática del Río Bogotá y sus afluentes.

Se reitera, que de conformidad con lo previsto en el artículo 27 de la Ley 472 de 1998, "La aprobación del pacto de cumplimiento se surtirá mediante sentencia", con dicho pacto se pone fin al proceso, bajo el entendido de que las partes llegaron a un acuerdo, el cual a su vez recibió el aval judicial, para la protección cierta de los derechos o intereses colectivos que se consideraron quebrantados y que dieron lugar al trámite de una acción popular. Es decir, cuando se profiere una sentencia, una vez ejecutoriada hace tránsito a cosa juzgada, es ley para las partes y el proceso concluye de manera definitiva, pues se ha alcanzado mediante ella el fin último del proceso, cual es el de evitar el daño contingente, hacer cesar el peligro, amenaza, vulneración o agravio sobre los derechos e intereses colectivos en beneficio de la colectividad y especialmente para las generaciones futuras.

Por estas razones, la Sala entra a analizar la sentencia de primera instancia frente a las órdenes impartidas, no respecto de los denominados "pactos de cumplimiento", pues en estricto sentido no existió pacto de cumplimiento que pusiera fin al proceso de manera definitiva.

***2.- Se viola el debido proceso cuando los beneficiarios de las licencias y autorizaciones otorgadas para la actividad minera no fueron citados a comparecer en la presente acción popular?***

Expediente No. 25000-23-27-000-2001-0479-01  
Acumulados Nos. 2000-0428, 2001-0122, 2001-0343  
Actor: GUSTAVO MOYA ÁNGEL Y OTROS  
Acción Popular

Solicitó la CAR la revocatoria del numeral 3° literal e) de la parte resolutive, toda vez que en su criterio se violó el artículo 29 de la C.P., el artículo 5° de la Ley 472 de 1998 y el Decreto 1180 de 2003, lo anterior al desconocer el derecho al debido proceso de los beneficiarios de las licencias, que no fueron citados a comparecer a la presente acción. De otro lado, manifestó que se omitió la aplicación de los artículos 62 y siguientes de la Ley 99 del 1993 relacionados con el otorgamiento de licencias ambientales.

El numeral 3° literal e) de la parte resolutive de la sentencia dispuso:

e) Dentro del término de los seis (6) meses siguientes a la notificación de esta sentencia el MAVDT, la CAR y el DAMA y los municipios deberán iniciar todas las diligencias tendientes a exigir de los particulares o entes públicos o privados a los que se les haya otorgado las licencias ambientales, autorizaciones, permisos o concesiones a cielo abierto, o en una zona específica, la restauración o sustitución morfológica y ambiental de todo el suelo intervenido en la explotación, por cuenta de los beneficiarios de dichos títulos, permisos o licencias, y en su caso haciendo efectiva la garantía de la póliza de seguro constituida para tales efectos; quienes deberán proceder a la respectiva restauración dentro del término máximo de los cuatro (4) meses siguientes a la fecha en que sean requeridos so pena de la revocatoria o de la suspensión de los mismos por parte de la autoridad ambiental y con la correspondiente intervención del Tribunal una vez se constate el desacato para hacer efectiva esta orden. Para tales efectos prevéngase a la CAR y al DAMA como a los demás órganos ambientales en cuanto a que no podrán invertir los recursos destinados para saneamiento ambiental en programas de reforestación que son de cargo de los particulares a los cuales precisamente deberán exigir el cumplimiento de esta obligación. En relación con las

Expediente No. 25000-23-27-000-2001-0479-01  
Acumulados Nos. 2000-0428, 2001-0122, 2001-0343  
Actor: GUSTAVO MOYA ÁNGEL Y OTROS  
Acción Popular

familias que se encuentran lavando arenas en el río TUNJUELO con necesidades básicas insatisfechas, la CAR y el DAMA dentro del territorio de su jurisdicción , respectivamente, con la participación del MINISTERIO DE MINAS Y ENERGÍA dentro de lo de su competencia, deberán hacer posible su reubicación en los demás complejos mineros, e igualmente, el DISTRITO CAPITAL como el DEPARTAMENTO DE CUNDINAMARCA y la BENEFICENCIA DE CUNDINAMARCA deberán dar prioridad a los programas sociales y educativos de esta comunidad en la forma dispuesta en la parte motiva de esta sentencia (...)"

El artículo 29 de la C.P., relativo al debido proceso y demás garantías procesales y el artículo 5° de la Ley 472, el cual reitera lo relacionado con las garantías procesales, debido proceso y equilibrio entre las partes. El Decreto 1180 de 2003, derogado por el art. 41 del Decreto Nacional 1220 de 2005, reglamentaba el título VIII de la Ley 99 de 1993 sobre Licencias Ambientales, particularmente lo previsto en los artículos 49 y siguientes.

Estima la CAR que con la orden impartida por la Sección Cuarta del Tribunal Administrativo de Cundinamarca se desconoció el debido proceso a los beneficiarios de las licencias porque no fueron citados a comparecer a la presente acción.

La Sala considera que no es de recibo el argumento del apelante, por cuanto es función de la CAR ejercer el control y vigilancia en el área de su jurisdicción y dentro del ámbito de su competencia, particularmente en relación con la exigencia de restauración o sustitución morfológica y ambiental de todo el suelo intervenido en la explotación a cargo de los beneficiarios de los títulos, por cuanto ello corresponde a la conducta que

Expediente No. 25000-23-27-000-2001-0479-01  
Acumulados Nos. 2000-0428, 2001-0122, 2001-0343  
Actor: GUSTAVO MOYA ÁNGEL Y OTROS  
Acción Popular

deben asumir los beneficiarios de las autorizaciones y que es posterior a su expedición.

Al ser la licencia ambiental la autorización que otorga la autoridad ambiental competente para la ejecución de una obra o actividad, el beneficiario de ella tiene obligaciones de prevención, mitigación, corrección, compensación y manejo de los efectos ambientales de la obra o actividad autorizada previstas en la licencia ambiental (art. 50, Ley 99 de 1993).

Son autoridades competentes para otorgar licencias ambientales, el Ministerio del Medio Ambiente, las corporaciones autónomas regionales (CAR) y los distritos o municipios.

La Constitución Política consagra en el artículo 79, el derecho de todas las personas a gozar de un ambiente sano, y a la participación de la comunidad en las decisiones que puedan afectarla. Igualmente establece para el Estado entre otros el deber de proteger la diversidad e integridad del ambiente. En desarrollo de esta disposición el artículo 60 de la Ley 99 de 1993, exige para la explotación minera a cielo abierto, la restauración o sustitución morfológica y ambiental de todo el suelo intervenido con la explotación, por cuenta del concesionario o beneficiario del título minero, quien la garantizará con una póliza de cumplimiento o con garantía bancaria. Y el artículo 85 del mismo ordenamiento dispone que las Corporaciones Autónomas Regionales impondrán al infractor de las normas sobre protección ambiental o sobre manejo y aprovechamiento de

Expediente No. 25000-23-27-000-2001-0479-01  
Acumulados Nos. 2000-0428, 2001-0122, 2001-0343  
Actor: GUSTAVO MOYA ÁNGEL Y OTROS  
Acción Popular

recursos naturales renovables, mediante resolución motivada y según la gravedad de la infracción, las sanciones y medidas preventivas previstas en esta disposición.

Luego no asiste razón a la CAR en cuanto afirma que debió citarse a los titulares de las licencias, permisos o autorizaciones al proceso por cuanto es una función propia de la CAR efectuar el control y seguimiento para que se cumpla con la obligación de restauración o sustitución morfológica y ambiental de todo el suelo intervenido en la explotación de los recursos naturales.

De otro lado, manifestó que se omitió la aplicación de los artículos 62 y siguientes de la Ley 99 del 1993 relacionados con el otorgamiento de licencias ambientales.

El artículo 62 de la Ley 99 de 1993 prevé precisamente la posibilidad, mediante resolución motivada, sustentada en concepto técnico, revocar o suspender la Licencia Ambiental, los permisos, autorizaciones o concesiones para el uso o aprovechamiento de los recursos naturales y del medio ambiente, **cuando quiera que las condiciones y exigencias por ella establecidas no se estén cumpliendo conforme a los términos definidos en el acto de su expedición.** Y agrega que, la revocatoria o suspensión de una Licencia Ambiental no requerirá consentimiento expreso o escrito del beneficiario de la misma.

Luego tampoco asiste razón al apelante en este sentido.  
El cargo no prospera

Expediente No. 25000-23-27-000-2001-0479-01  
 Acumulados Nos. 2000-0428, 2001-0122, 2001-0343  
 Actor: GUSTAVO MOYA ÁNGEL Y OTROS  
 Acción Popular

**3.- Se desconocen por el Tribunal de instancia los artículos 6 y 209 de la Constitución Política y se genera un detrimento del patrimonio de la entidad al imponer la obligación a la CAR de entregar al IDEAM de manera gratuita, la red hidrometeorológica de su propiedad?**

La CAR requirió pronunciamiento favorable de modificar el numeral 3º, literal i), de la parte resolutive, al quebrantarse los artículos 6º y 209 de la Constitución Política, toda vez que la CAR cuenta con una red hidrometeorológica de su propiedad, con más de 100 estaciones de monitoreo a lo largo del río Bogotá, y de acuerdo con la obligación impuesta por el Tribunal debe ponerla a disposición del IDEAM de manera gratuita, generando un desmedro al patrimonio de la entidad.

El numeral 3º literal i) de la parte resolutive de la sentencia, dispuso:

"i) Creación de una sola red Hidrometereológica y estación de monitoreo de las aguas, en la forma prescrita en el punto 6.5.3. de la parte motiva, direccionadas por el INSTITUTO DE HIDROLOGÍA METEEREOLOGÍA Y ESTUDIOS AMBIENTALES y alimentada con las bases de datos de la CORPORACION AUTONOMA REGIONAL DE CUNDINAMARCA y del DEPARTAMENTO ADMINISTRATIVO DEL MEDIO AMBIENTE DE BOGOTÁ para toda el área de la CUENCA DEL RIO BOGOTÁ Y DE SUS AFLUENTES, con la constitución de un Fondo Común Económico y con el aporte de los recursos que para tales efectos dispongan en sus presupuestos, como los demás de todas las entidades involucradas en este proceso, quienes para tal efecto deberán contribuir en una cuota parte, en todo caso para optimizar el cumplimiento de dicha función y economizar los recursos, en la proporción que señalen las autoridades ambientales (si así lo disponen) de común acuerdo con éstos; a falta de acuerdo el Tribunal definirá dicho aspecto; (...)".

Expediente No. 25000-23-27-000-2001-0479-01  
Acumulados Nos. 2000-0428, 2001-0122, 2001-0343  
Actor: GUSTAVO MOYA ÁNGEL Y OTROS  
Acción Popular

El punto 6.5.3. de la sentencia a su vez consideró la posibilidad de crear una única red hidrometereológica y estación de monitoreo la cual se deberá alimentar con la información de la CAR para toda el área de la Cuenca del Río Bogotá.

Ello no obsta para que se utilice la red con la que cuenta la CAR y no tenga que crearse una nueva red, precisamente la sentencia lo que busca es que se aúnen esfuerzos entre las entidades comprometidas por razón de su competencia en llevar un registro detallado de la información para efectuar el monitoreo y evitar los vertimientos ilegales, que no puede por lo tanto generar un detrimento patrimonial para la CAR porque ha de utilizarse acorde con los requerimientos y para lo que fue establecida sin que ello obste para que las entidades tengan la información que sea útil para lo de sus respectivas competencias.

Habrá lugar a precisar la forma de participación de cada una de las entidades involucradas y la viabilidad del Fondo Común Económico y los recursos que lo integraran, así como la forma de realizar los aportes.

**4.- La orden impartida por el Tribunal contenida en el numeral 4º de la sentencia, consistente en la ampliación de la PTAR Salitre y la construcción de la PTAR Canoas, sin aprobación de la CAR viola los artículos 113 de la Constitución Política, 44 de la Ley 99 de 1993 y los Decretos 1339 de 1994 y 1200 de 2004?**

El numeral cuarto de la sentencia dispuso aprobar la ampliación de la planta de tratamiento del Salitre para tratar un efluente no inferior a una capacidad de

Expediente No. 25000-23-27-000-2001-0479-01  
Acumulados Nos. 2000-0428, 2001-0122, 2001-0343  
Actor: GUSTAVO MOYA ÁNGEL Y OTROS  
Acción Popular

8m<sup>3</sup>/s y la forma de destinar los recursos para la construcción de la PTAR Canoas.

Cabe anotar que las órdenes impartidas por el Tribunal de instancia no corresponden a la aprobación del Pacto de Cumplimiento, pues como se dejó anotado la sentencia al aprobar y modificar los acuerdos parciales logrados con los diferentes intervinientes en este proceso no es fruto de un pacto de cumplimiento, sino de la terminación del proceso después de haber agotado las etapas respectivas y ante la audiencia fallida de Pacto de Cumplimiento.

Estima el apelante que la orden de restauración morfológica del suelo dirigida a los titulares de autorizaciones y licencias contraviene las disposiciones contenidas en los artículos 58 y 62 de la Ley 99 de 1993 y los Decretos 1339 de 1994 y 1200 de 2004 (hoy modificadas), disposiciones que regulan el trámite para la expedición de las licencias ambientales.

Al respecto cabe anotar por la Sala que estas disposiciones hoy se encuentran modificadas y su contenido es del siguiente tenor:

Los artículos 58 y 62 de la Ley 99 de 1993, disponen:

**Artículo 58°.-** *Del Procedimiento para el Otorgamiento de Licencias Ambientales. Modificado por el art. 224, Ley 1450 de 2011.* El interesado en una Licencia Ambiental presentará ante la autoridad ambiental competente la solicitud acompañada del Estudio de Impacto Ambiental correspondiente para su evaluación. La autoridad competente dispondrá de

Expediente No. 25000-23-27-000-2001-0479-01  
 Acumulados Nos. 2000-0428, 2001-0122, 2001-0343  
 Actor: GUSTAVO MOYA ÁNGEL Y OTROS  
 Acción Popular

treinta (30) días hábiles para solicitar al interesado información adicional en caso de requerirse. Allegada la información requerida, la autoridad ambiental dispondrá de quince (15) días hábiles adicionales para solicitar a otras entidades o autoridades los conceptos técnicos o informaciones pertinentes que deberán serle remitidos en un plazo no mayor de 60 días hábiles. Recibida la información o vencido el término del requerimiento de informaciones adicionales, la autoridad ambiental decidirá mediante resolución motivada sobre la viabilidad ambiental del proyecto o actividad y otorgará o negará la respectiva licencia ambiental en un término que no podrá exceder de sesenta (60) días hábiles.

**Parágrafo.-** El Ministerio del Medio Ambiente dispondrá hasta de 120 días hábiles para otorgar la Licencia Ambiental Global y las demás de su competencia, contado a partir del acto administrativo de trámite que reconozca que ha sido reunida toda la información requerida, según el procedimiento previsto en este artículo. **Reglamentado** Decreto Nacional 1753 de 1994 **Licencias Ambientales.**

**Artículo 62°.-** *De la Revocatoria y Suspensión de las Licencias Ambientales.* La autoridad ambiental, salvo los casos de emergencia, podrá mediante resolución motivada, sustentada en concepto técnico, revocar o suspender la Licencia Ambiental, los permisos, autorizaciones o concesiones para el uso o aprovechamiento de los recursos naturales y del medio ambiente, cuando quiera que las condiciones y exigencias por ella establecidas no se estén cumpliendo conforme a los términos definidos en el acto de su expedición. **Reglamentado** Decreto Nacional 1753 de 1994 **Licencias ambientales.**

La revocatoria o suspensión de una Licencia Ambiental no requerirá consentimiento expreso o escrito del beneficiario de la misma.

La suspensión de obras por razones ambientales, en los casos en que lo autoriza la ley, deberá ser motivada y se ordenará cuando no exista licencia o

Expediente No. 25000-23-27-000-2001-0479-01  
Acumulados Nos. 2000-0428, 2001-0122, 2001-0343  
Actor: GUSTAVO MOYA ÁNGEL Y OTROS  
Acción Popular

cuando, previa verificación del incumplimiento, no se cumplan los requisitos exigidos en la Licencia Ambiental correspondiente.

Quedan subrogados los artículos 18, 27, 28 y 29 del Decreto Legislativo 2811 de 1974.

Dentro de este marco normativo la orden impartida por el Tribunal se ajusta a los dictámenes normativos, por cuanto si bien el tiempo otorgado para realizar la verificación del cumplimiento de las obligaciones asumidas, particularmente la de restauración morfológica del suelo, debe cumplirse en los términos previstos en la licencia o autorización y no significa que se vaya a solicitar antes del vencimiento de la licencia o autorización, como lo entiende el apelante, sino que lo que se pretende es que en ejercicio de su competencia la CAR asuma el deber de verificar si se da cumplimiento a las actividades autorizadas y las obligaciones derivadas de su ejercicio y de encontrar un incumplimiento por parte del beneficiario del permiso, licencia o autorización para que adopte los correctivos de ley, incluido el de revocar la decisión previo cumplimiento del procedimiento establecido en la ley.

Hoy la Ley 1333 de 2009, como lo advierte la CAR en sus alegatos de conclusión trae un verdadero sistema administrativo sancionatorio ambiental, así como la autoridad competente para adelantar el procedimiento e imponer las sanciones.

**5.- El numeral 4 literal h) de la sentencia del Tribunal de instancia quebranta los artículos 113 y 209 de la**

Expediente No. 25000-23-27-000-2001-0479-01  
 Acumulados Nos. 2000-0428, 2001-0122, 2001-0343  
 Actor: GUSTAVO MOYA ÁNGEL Y OTROS  
 Acción Popular

**Constitución Política, así como el artículo 68 de la Ley 489 de 1998 en cuanto desconoce el principio de especialidad de la administración al revocarle sus competencias exclusivas?**

La sentencia señaló en los puntos 6.9 y 6.9.3:

6.9. DE LA APROBACIÓN DE LOS PACTOS DE CUMPLIMIENTO REGISTRADOS POR LOS MUNICIPIOS

6.9.1. Además de los aspectos y órdenes que se mencionan e imparten en el punto 6.10.2 (6.2.10.1. a 6.10.2.5) de esta sentencia, en lo que tiene que ver con los MUNICIPIOS la aprobación de los pactos se sujetará al cumplimiento de las siguientes reglas:

*Procesos de Producción más Limpia* para lograr la descontaminación en la fuente, adscrita en primer lugar a la CAR como suprema autoridad de cuenca en el sector municipal y en el rural del Distrito Capital y al DAMA en el sector urbano de éste, en segundo lugar y de acuerdo con las atribuciones especiales previstas en el artículo 65 de la Ley 99 de 1993, a cargo de los alcaldes municipales como locales del Distrito Capital, a quienes como primera autoridad de policía en el área de su municipio o de su localidad, les corresponderá cooperar con la autoridad ambiental para lograr tales metas, unos y otros bajo la coordinación de las autoridades ambientales, las que previamente en mesas de trabajo deberán enfilar dicha actividad hacia los vertimientos industriales (en especial los de la industria casera), agrícolas y pecuarios y demás, e implementar y realizar coordinadamente con las Juntas de Acción Comunal y con las escuelas y colegios la gestión de talleres con aquél sector de la producción como con los pobladores por los vertimientos residuales domésticos para evitar que al alcantarillado se arrojen carbohidratos y grasas que son nocivos para las fuentes de aguas en cuanto pueden llevar al consumo del oxígeno natural y al desarrollo de condiciones sépticas, como también para incentivar el uso de detergentes biodegradables y reducir en el área de su localidad el uso exagerado de tales jabones que al contener altos niveles de fósforo producen la eutrofización del cuerpo receptor, como ampliamente quedó analizado en el aparte pertinente de este fallo al referirse sobre el estado del río y el uso de las aguas, entre tanto el gobierno nacional reglamenta lo pertinente. No deberán perder de vista dichas autoridades la importancia en el control de los nutrientes y plaguicidas en la agricultura.

Expediente No. 25000-23-27-000-2001-0479-01  
Acumulados Nos. 2000-0428, 2001-0122, 2001-0343  
Actor: GUSTAVO MOYA ÁNGEL Y OTROS  
Acción Popular

En cumplimiento de esta orden, igualmente deberán gestionar y promover con la coordinación y dirección de la Secretaría de Educación y de Salud para llevar a cabo dentro del PRAE de cada una de las escuelas y colegios de los municipios la educación ambiental y por conducto de sus puestos de salud u hospitales los talleres de producción más limpia.

*Ejecución de los Planes Maestros de Alcantarillado* para que todas las aguas residuales de cada municipio lleguen a las respectivas Plantas de Tratamiento deberán terminar tales obras en el tiempo señalado dentro de sus respectivos Pactos de Cumplimiento, en todo caso para el año 2009, sus vertimientos deberán ir directamente a las PTAR y no a las fuentes de agua natural.

*Construcción de las Plantas de Tratamiento.* Los municipios que no realizaron gestiones ante la CAR para la ejecución de tales obras, entidad que ya no tiene a su cargo el realizarlas según lo prescrito en la Ley 99 de 1993, tendrán a su cargo el construir las que falten para cubrir todo el caudal de sus vertimientos residuales y con cargo a la sobretasa del predial que la CAR debe transferirle en un 50%, lo cual deberán acordar con esta entidad en orden a priorizar sus obras de saneamiento ambiental, como también con el producto de los recursos por Regalías y Ley 715 de 2001, en fin de aquellos de que dispongan para tales fines. Por su parte, la CAR en cumplimiento de lo aprobado por las partes en la audiencia en que fue discutido su pacto de cumplimiento, deberá poner las PTAR que tiene instaladas en los municipios a operar en óptimas condiciones y entregarlas en el término máximo de tres (3) años y pagar la deuda que contrajo de las que ya existen.

*Operación de las Plantas de Tratamiento a partir de la fecha en que la CAR les haga entrega de las ya instaladas por su cuenta.* Realizada la entrega de las PTAR por la CAR, los municipios con cargo a la tasa retributiva que hace parte del cargo por unidad de consumo, consagrado en el artículo 90 de en la Ley 142 de 1994 y en los artículos 4º y 37 de la Resolución CRA 287 de 2004 aplicable a todas las personas prestadoras de los servicios de acueducto y alcantarillado, salvo las excepciones contenidas en la ley, según la previsión del artículo 1º de la precitada resolución, deberán disponer de los recursos para su operación y mantenimiento. Desde ese momento, el municipio será el responsable de la contaminación de los recursos hídricos que sean utilizados para descargar directamente sus vertimientos residuales.

Expediente No. 25000-23-27-000-2001-0479-01  
Acumulados Nos. 2000-0428, 2001-0122, 2001-0343  
Actor: GUSTAVO MOYA ÁNGEL Y OTROS  
Acción Popular

Cumplimiento de las sentencia dictadas por este tribunal sobre la *optimización de los mataderos y plantas de faenado* en el término que en ellas se dispuso, como también las de aquellos municipios que no han sido objeto de la interposición de Acciones Populares sobre la materia y que estén contaminando las aguas con los residuos ruminales.

Gestión ante la CAR y el MAVDT para que cese la *contaminación por escorrentía* de las laderas y cerros de las exploraciones y explotaciones mineras. Esta conducta dará lugar a la compulsa de las piezas procesales pertinentes para que se abran los respectivos procesos penales por incursión en los hechos ilícitos previstos en los artículos 332 y 333 del Código Penal.

Exigencia como primera autoridad de policía a quienes se encuentren explotando sus recursos naturales renovables y no renovables para que procedan a la *reforestación de los cerros que rodean a sus municipios, de los nacimientos y de las cuencas de los ríos y quebrada afluentes del RÍO BOGOTÁ* y de éste, cuando a consecuencia de sus procesos productivos hayan ocasionado dicho impacto ambiental. Deberán proceder los señores alcaldes a formular ante la CAR y ante el MAVDT los respectivos procesos sancionatorios y éstas deberán en forma inmediata adelantar el trámite sin demoras tendientes a que se cumpla esta orden por los particulares o entidades responsables del daño ambiental. Término máximo para mostrar los resultados de este proceso de control seis meses contados a partir de la notificación de esta sentencia, teniendo en cuenta el requerimiento continuo que la Magistrada Sustanciadora ha venido realizando a las autoridades ambientales para exigir de los particulares y demás personas jurídicas que se encuentren adelantando dichas actividades sobre el cumplimiento de las obligaciones de los estudios de impacto ambiental o de los planes de manejo cuando se les concedió las licencias, permisos o títulos mineros y, el cierre a las que no hayan sido objeto de los mismos.

6.9.2. El incumplimiento de esta orden por unas y otras autoridades dará lugar no solo a la apertura del trámite incidental por desacato, sino a la compulsa de las piezas procesales pertinentes ante la PROCURADURÍA GENERAL DE LA NACIÓN y ante la FISCALÍA GENERAL DE LA NACIÓN para efectos de las sanciones disciplinarias a imponer y para que se determine su responsabilidad penal como copartícipes en la comisión de los tipos penales descritos en los artículos 331, 332, 333 del Código Penal, por continuar contribuyendo con su actuar omisivo a la

Expediente No. 25000-23-27-000-2001-0479-01  
Acumulados Nos. 2000-0428, 2001-0122, 2001-0343  
Actor: GUSTAVO MOYA ÁNGEL Y OTROS  
Acción Popular

realización de la conducta punible (inc. 2º, art. 30 C.P.).

6.9.3. Los municipios como el Distrito Capital, deberán tener en cuenta que la inversión de sus recursos en reforestación sólo corre a su cargo en defecto del cumplimiento de tal obligación por los particulares, a quienes, previamente deberán adelantarse los procesos administrativos correspondientes en orden a que sean ellos quienes den cumplimiento a lo dispuesto en los artículos 57 y 60 de la Ley 99 de 1993.

El literal h) del numeral cuarto de la sentencia ordenó que: "*h) EL DRAGADO del RÍO BOGOTÁ Y DE SUS AFLUENTES correrá con cargo a los recursos de la EAAB, de la CAR del MAVDT y del MINISTERIO DE MINAS Y ENERGÍA en la forma señalada en el punto 6.18. de la parte motiva de este fallo*".

El numeral 6.18 de la sentencia por su parte señaló:

"6.18. DEL DRAGADO DEL RÍO Y SUS AFLUENTES correrá por cuenta de la E.A.A.B. en la franja de los ríos y en los términos y plazos que tiene presupuestado y de la CORPORACIÓN AUTÓNOMA REGIONAL DE CUNDINAMARCA CON LA COFINANCIACIÓN DEL MINISTERIO DE MINAS Y ENERGÍA Y DEL MEDIO AMBIENTE en el territorio de la jurisdicción donde han sido concedidas las respectivas licencias de las exploraciones mineras causantes de la erosión de las montañas y laderas, por ende de la escorrentía y de la sedimentación del RÍO Y SUS AFLUENTES, dragado del que los lodos serán depositados en el lugar que determinen las autoridades ambientales involucradas".

Señala el impugnante que el Tribunal de instancia desconoce la competencia de la CAR en esta materia, más aún cuando la CAR viene desarrollando un plan de dragado en cumplimiento de sus competencias administrativas.

Expediente No. 25000-23-27-000-2001-0479-01  
Acumulados Nos. 2000-0428, 2001-0122, 2001-0343  
Actor: GUSTAVO MOYA ÁNGEL Y OTROS  
Acción Popular

De conformidad con lo previsto en el CONPES 3631 de 2009, corresponde adelantar las labores de dragado a la CAR, en ejecución del crédito de la Banca Multilateral y para efectos de la Adecuación Hidráulica y Recuperación Ambiental del Río Bogotá, así se consigna en el citado documento:

ii) Adecuación Hidráulica y Recuperación Ambiental del Río Bogotá.

Este componente incluye obras de adecuación hidráulica como el **dragado del río o el realce de los jarillones, con importantes mejoras ambientales como la restauración de meandros y humedales, el diseño paisajístico y zonas multifuncionales a lo largo del Río**. Las obras se adelantan sobre la cuenca media, en un tramo de aproximadamente 68 Kms. comprendidos entre la estación de Puente la Virgen en el municipio de Cota y las compuertas de la estación de la Empresa Generadora y Comercializadora de Energía -EMGESA S.A. E.S.P., en el lugar denominado Alicachín, en el municipio de Soacha.

El objetivo del proyecto es recuperar la sección hidráulica del río, reducir los riesgos por inundación, mejorar los drenajes de la ciudad y crear áreas a lo largo del río que contribuyan a la restauración de ecosistemas, el mejoramiento de la calidad del agua y la integración urbano-paisajístico en los espacios públicos.

Las obras propuestas controlarán las inundaciones ocasionadas por el río Bogotá, con un periodo de retorno de 100 años, en el tramo intervenido. Este componente incluye las siguientes actividades:

- Adecuación hidráulica. Las obras para controlar las inundaciones ocasionadas por el río, con un periodo de retorno de 100 años, incluyen el traslado del jarillón de una de las márgenes y la extracción de sedimentos para lograr el aumento de la sección transversal y por lo tanto de la capacidad hidráulica del cauce. Las obras incluyen excavación, movimiento de tierras y construcción de los jarillones.

Expediente No. 25000-23-27-000-2001-0479-01  
Acumulados Nos. 2000-0428, 2001-0122, 2001-0343  
Actor: GUSTAVO MOYA ÁNGEL Y OTROS  
Acción Popular

- Adquisición de predios, reasentamientos y compensaciones. El aumento de la sección por traslado del jarillón, la necesidad de espacio para la disposición del material removido y el desarrollo del proyecto paisajístico implican la necesidad de adquirir una franja de terreno de aproximadamente 60 metros de ancha a lo largo del tramo proyectado que comprenden 216 predios de los cuales 173 son particulares con un área de 591 hectáreas. Estas obras están previstas en cuatro tramos a lo largo de los 68 kms. Los tramos A, B y D están ubicados en zonas rurales en las que se deben adquirir predios y posiblemente entregar compensaciones económicas por la actividad económica existente.

En el tramo C se encuentran ubicados los Barrios Porvenir 1 y 2, en el municipio de Mosquera; allí se requiere la reubicación de aproximadamente 100 hogares y 200 familias que no cuentan con un título de propiedad.

- Paisajismo y restauración del hábitat. A lo largo de los 68 kms. se incluyen la plantación de especies nativas y el paisajismo para armonizar las obras con las zonas adyacentes y restaurar los ecosistemas en la ribera del río, basadas en los requerimientos del uso del suelo.

- Recuperación de 8 zonas multifuncionales, incluyendo integración ecológica e hidráulica con el Río Bogotá. Dependiendo de sus características físicas, las áreas intervenidas restaurarán meandros o crearán y mejorarán los humedales, generando espacios de recreación asociados al río urbano.

Dentro de este contexto y acorde con las competencias asignadas a la Corporación Autónoma Regional de Cundinamarca, con miras a dar aplicación al artículo 209 de la Carta Política, procederá modificar en este sentido la decisión adoptada por el Tribunal de instancia en cuanto hace a la autoridad competente para efectuar el dragado del Río Bogotá y de sus afluentes y no a la EAAB, como parte del desarrollo del proyecto de recuperación y adecuación Hidráulica del Río Bogotá, e

Expediente No. 25000-23-27-000-2001-0479-01  
Acumulados Nos. 2000-0428, 2001-0122, 2001-0343  
Actor: GUSTAVO MOYA ÁNGEL Y OTROS  
Acción Popular

incluyendo además las cuencas alta y baja de su jurisdicción.

**6.- El numeral 5º literal d) de la parte resolutive de la sentencia al disponer sobre los programas y el monto de las inversiones que se deben efectuar en el área de la cuenca del río Bogotá, desconoce la competencia de la CAR y el principio de la separación de poderes, previstos en el artículo 45 de la Ley 99 de 1993, el Decreto 1933 de 1994 y el Decreto 1729 de 2002?**

La sentencia al respecto ordenó:

**QUINTO:** Así mismo, las obras de que trata el literal e) del ordinal anterior, se construirán en el siguiente término y con cargo a las siguientes entidades y recursos: (...) **d)** De igual manera, para efectos de la operación y el mantenimiento de la PTAR CANOAS se hará con cargo a los recursos por Ley 715 del Distrito Capital que perciba después del año 2009, y con las transferencias del sector eléctrico a la CAR y a los municipios, especialmente Sibaté que recibe un porcentaje mayor que los demás, de la siguiente manera: El Distrito Capital aportará el 50% del 41% del Propósito General, la suma que reste del precio de la operación descontado dicho porcentaje será cubierta por partes iguales por la CAR, el MUNICIPIO DE SIBATÉ y por los municipios que reciben las transferencias, considerados estos últimos como una sola parte para efectos de dividir en tres partes el saldo;

Como este tema hace parte de la solución integral para la Cuenca del Río Bogotá, la decisión a adoptarse se tomará teniendo en cuenta los factores técnico, financiero y de competencia, asignando a la gerencia estratégica de cuenca su seguimiento y verificación.

Corresponde al juez popular, en todo caso, impartir las órdenes para efecto de amparar el derecho colectivo, obviamente dentro del ámbito de competencia de las autoridades a las cuales se les asigne una obligación

Expediente No. 25000-23-27-000-2001-0479-01  
Acumulados Nos. 2000-0428, 2001-0122, 2001-0343  
Actor: GUSTAVO MOYA ÁNGEL Y OTROS  
Acción Popular

de hacer o no hacer y observando la capacidad financiera así como los principios del presupuesto.

**8.- La contratación de un solo operador regional para la prestación del servicio de tratamiento de aguas residuales atenta contra el principio de la libre competencia?**

Solicita la CAR se revoque el numeral 4º, literal c) de la sentencia de primera instancia por considerar que viola el artículo 113 de la Constitución Política, la Ley 142 de 1994 y el Decreto 1200 de 2004, porque en su criterio se desconoció el principio de la separación de poderes y las normas que garantizan la libre competencia en la prestación de los servicios públicos domiciliarios, toda vez que la contratación de un solo operador regional para la prestación del servicio de tratamiento de aguas residuales atentaría contra los principios de la libre competencia.

La sentencia precisó en el numeral impugnado:

"c) Dentro del término máximo de tres (3) años, contados a partir de la fecha de presentación en audiencia de su pacto de cumplimiento, la CORPORACIÓN AUTÓNOMA REGIONAL DE CUNDINAMARCA deberá realizar las obras y mejoras que requieren las Plantas de Tratamiento de su propiedad que tiene instaladas en los municipios de que da cuenta la parte motiva de este fallo para colocarlas en capacidad de tratar en óptimas condiciones el efluente residual que cada una de esas localidades esté vertiendo a las mismas y, los municipios deberán comenzar a operarlas con cargo a sus tarifas y recursos inmediatamente la CAR dé cumplimiento a lo aquí dispuesto, de acuerdo con lo aprobado respecto de este punto en las audiencias de discusión de los respectivos pactos, presentados por ésta como por aquellos. **En todo caso, en orden a garantizar la operación y**

Expediente No. 25000-23-27-000-2001-0479-01  
Acumulados Nos. 2000-0428, 2001-0122, 2001-0343  
Actor: GUSTAVO MOYA ÁNGEL Y OTROS  
Acción Popular

**mantenimiento de las PTAR, la CAR, podrá contratar un solo operador regional, con el cobro de las tarifas respectivas a los municipios y, estos, a su vez, podrán incluir este pago con cargo a las tarifas de acueducto y alcantarillado de los usuarios de acuerdo con lo prescrito en el artículo 16 de la Resolución CRA 287 de 2004;".**

De conformidad con la competencia asignada al juez popular, éste puede impartir órdenes, sin embargo de acuerdo con los documentos e informes allegados al proceso se analizará si es viable lo ordenado por el Tribunal respecto de la CAR, pero más que todo por cuanto la entrega de las PTAR se viene realizando de conformidad con lo establecido en la Ley 142 de 1994. Ello según lo acreditó la CAR en respuesta al requerimiento por este Despacho obrante como anexo 2 del cuaderno 19. Sin embargo, si bien es cierto la CAR hizo entrega de las Plantas de Tratamiento que venía operando, esta tarea así como su mantenimiento y actualización corresponderá a los municipios en los términos previstos en la Ley 142 de 1994.

En cuanto a la contratación de un solo operador por parte de la CAR para su mantenimiento, estima la Sala que ello no viola el derecho a la libre competencia por cuanto el proceso de contratación habrá de verificarse acorde con el ordenamiento jurídico, los principios de la contratación administrativa con miras a garantizar la transparencia del proceso.

**9.- Procede revocar el numeral 4º, literal f), por violación del artículo 113 de la Constitución Política, artículo 45 de la Ley 99 de 1993, Decreto 1933 de 1994 y el Decreto 1729 de 2002, en cuanto se atenta contra las normas de planificación ambiental, ya que la CAR al recibir las transferencias del sector eléctrico es la**

Expediente No. 25000-23-27-000-2001-0479-01  
 Acumulados Nos. 2000-0428, 2001-0122, 2001-0343  
 Actor: GUSTAVO MOYA ÁNGEL Y OTROS  
 Acción Popular

*única que tiene la obligación y la competencia exclusiva de determinar las condiciones y proyectos en que deben invertirse dichos recursos y tales definiciones no son de competencia del juez de la acción popular?*

La sentencia dispuso en el numeral cuarto literal f):

CUARTO: DECLÁRASE que la descontaminación del RÍO BOGOTÁ y sus afluentes de que dan cuenta las pretensiones y del EMBALSE DEL MUÑA, también comprende la ejecución de las siguientes obras que fueron materia de análisis y aprobación en los respectivos pactos de cumplimiento como por la MESA DE SOLUCIÓN TÉCNICA INTEGRAL PARA LA DESCONTAMINACIÓN DEL RÍO BOGOTÁ que para el efecto se llevó a cabo con la intervención de todos los técnicos expertos que representaron a cada uno de los entes públicos demandados, como se da cuenta en la parte motiva:

(...) **f) APRÚEBASE** EL PACTO DE CUMPLIMIENTO PRESENTADO POR LA EMPRESA DE ENERGÍA DE BOGOTÁ Y POR LA EMPRESA GENERADORA DE ENERGÍA "EMGESA" en los términos señalados en su propuesta de pacto y aprobados por las partes, con la siguiente modificación respecto a la operación de las obras del embalse: EMGESA y la EEB deberán asumir la operación y mantenimiento de las obras a que se refiere el numeral 6.10.4.3. (Dragado y disposición de lodos, Operación y mantenimiento de sistemas de aireación, Cosecha y disposición de buchón), de la siguiente manera: la primera hasta el año 2007 y la segunda hasta el año 2009. En adelante la CAR, el MUNICIPIO DE SIBATÉ y por los demás MUNICIPIOS que reciben transferencias de EMGESA o del sector eléctrico, destinarán un porcentaje atendiendo al monto de los recursos que cada uno percibe, descontado el que les corresponde aportar para la operación y mantenimiento de la PTAR CANOAS en la forma como se dispone en la parte motiva de esta sentencia y hasta tanto la EAAB asuma el costo por este concepto.

Es claro que la orden impartida a la CAR deberá estar sujeta a las disposiciones legales, pero deberá asignar en su presupuesto la partida correspondiente para esos efectos, partiendo de la base de que los recursos que

Expediente No. 25000-23-27-000-2001-0479-01  
Acumulados Nos. 2000-0428, 2001-0122, 2001-0343  
Actor: GUSTAVO MOYA ÁNGEL Y OTROS  
Acción Popular

recibe por concepto de transferencias del sector eléctrico deben ser destinados para el Dragado y disposición de lodos, Operación y mantenimiento de sistemas de aireación, cosecha y disposición de buchón en el embalse del Muña por encontrarse dentro del ámbito de su jurisdicción y competencia, sin embargo, habrá lugar a establecer si por tener la administración del Embalse del Muña, el concesionario EMGESA deberá asumir la responsabilidad frente al Embalse, su mantenimiento y disminución del impacto ambiental para la población.

Considera la Sala que en estos términos se mantendrá la orden a EMGESA y a la E.E.B. de asumir el mantenimiento y disminución del impacto ambiental del Embalse del Muña, ésta última por cuanto se beneficia económicamente de la actividad de generación. Así pues la E.E.B. deberá prestar su concurso en todo lo relacionado con el Embalse del Muña acorde con los lineamientos que establezca la CAR.

En cuanto a que se desconocen con la orden impartida los artículos 45 de la Ley 99 de 1993, el Decreto 1933 de 1994 y el Decreto 1729 de 2002, la Sala considera:

El artículo 45, se refiere a las transferencias del sector eléctrico a la CAR:

"Artículo 45.- *Transferencia del Sector Eléctrico.* Las empresas generadoras de energía hidroeléctrica cuya potencia nominal instalada total supere los 10.000 kilovatios, transferirán el 6% de las ventas brutas de energía por generación propia, de acuerdo con la tarifa que para ventas en bloque señale la

Expediente No. 25000-23-27-000-2001-0479-01  
 Acumulados Nos. 2000-0428, 2001-0122, 2001-0343  
 Actor: GUSTAVO MOYA ÁNGEL Y OTROS  
 Acción Popular

Comisión de Regulación Energética, de la manera siguiente:

1.- El 3% para las Corporaciones Autónomas Regionales que tengan jurisdicción en el área donde se encuentra localizada la cuenca hidrográfica y el embalse, **que será destinado a la protección del medio ambiente y a la defensa de la cuenca hidrográfica y del área de influencia del proyecto.**

El Decreto 1933 de 1994, Por el cual se reglamenta el artículo 45 de la Ley 99 de 1993, establece la forma de distribuir tales ingresos, reiterando el contenido del artículo 45 y desarrollando su alcance pero sin desconocer que el 3% de las transferencias se hace a la CAR para destinación específica y en los términos allí dispuestos<sup>238</sup>.

Por su parte el Decreto 1729 de 2002, dispone:

Artículo 23. La financiación de los planes de ordenación de las cuencas hidrográficas se hará con cargo a los siguientes recursos: (...) 6. Con los recursos provenientes de las transferencias del sector eléctrico.

Luego no asiste razón a la CAR en cuanto a su inconformidad con la sentencia relacionada con la obligación de realizar el mantenimiento del embalse del Muña hasta tanto la EAAB asuma esta obligación.

---

<sup>238</sup> Distribución del porcentaje de las ventas brutas por generación hidroeléctrica. La distribución del 6% de las ventas brutas de energía por generación propia en caso de generación hidroeléctrica de que trata el artículo 45 de la Ley 99 de 1993, se hará así:

1. El 3% para las Corporaciones Autónomas Regionales que tengan jurisdicción en el área donde se encuentra localizada la cuenca hidrográfica y el embalse, que será destinado a la protección del medio ambiente y a la defensa de la cuenca hidrográfica y del área de influencia del proyecto.

Cuando en una cuenca tengan jurisdicción más de una Corporación Autónoma Regional, el 3% se distribuirá a prorrata de área que cada Corporación tenga con respecto al área total de la cuenca.

Expediente No. 25000-23-27-000-2001-0479-01  
 Acumulados Nos. 2000-0428, 2001-0122, 2001-0343  
 Actor: GUSTAVO MOYA ÁNGEL Y OTROS  
 Acción Popular

**10.- El Tribunal de instancia desconoció la política de la CAR en lo referente al manejo del embalse, vulnerando el principio de la separación de poderes?**

No desconoce el Tribunal de instancia la política de la CAR en cuanto hace al manejo del embalse, por cuanto el Plan de vida Muña 2000, asignó responsabilidades tanto a las autoridades ambientales como a la multinacional ENDESA que para el embalse del Muña es a EMGESA, sin que ello implique que no corresponda a la CAR hacer seguimiento de las obligaciones que frente al impacto ambiental le corresponden a EMGESA la cual se lucra de la explotación del recurso hídrico para generación de energía con impactos altos sobre el ambiente y la población, en particular la del municipio de Sibaté. Se trata de un tema de corresponsabilidad, esto es, que todos los actores deben responder en tanto se lucren de la explotación del recurso hídrico y, en consecuencia, deben contribuir con su descontaminación.

La corresponsabilidad social y ambiental, definida como el trabajo responsable de todos frente a un problema o conflicto<sup>239</sup>, en este caso la contaminación del río Bogotá, que afecta la sociedad y la armonía con la naturaleza.

**11.- Compete a la CAR reubicar a las personas que se encuentran asentadas en la ronda del río?**

Solicita la CAR que se revoque el numeral 3º, literal e), por violación de los artículos 6º y 113 de la

---

<sup>239</sup>Estrategia de corresponsabilidad social en la lucha contra los incendios forestales, agosto 25 DE 2011, Ministerio de Ambiente y Desarrollo Sostenible.

Expediente No. 25000-23-27-000-2001-0479-01  
Acumulados Nos. 2000-0428, 2001-0122, 2001-0343  
Actor: GUSTAVO MOYA ÁNGEL Y OTROS  
Acción Popular

Constitución Política, lo anterior en razón a que la función de reubicar a las personas no es competencia de la CAR sino del Ministerio de Ambiente, Vivienda y Desarrollo Territorial.

El numeral tercero literal e) de la sentencia, dispuso:

"e)(...)En relación con las familias que se encuentran lavando arenas en el RÍO TUNJUELO con necesidades básicas insatisfechas, la CAR y el DAMA dentro del territorio de su jurisdicción, respectivamente, con la participación del MINISTERIO DE MINAS Y ENERGÍA dentro de lo de su competencia, deberán hacer posible su reubicación en los demás complejos mineros, e igualmente, el DISTRITO CAPITAL como el DEPARTAMENTO DE CUNDINAMARCA y LA BENEFICENCIA DE CUNDINAMARCA deberán dar prioridad a los programas sociales y educativos de esta comunidad en la forma dispuesta en la parte motiva de esta sentencia (...)"

Estima la impugnante que no es competencia de la CAR la reubicación porque tal actividad compete al Ministerio de Vivienda, lo cual a juicio de la Sala malinterpreta la Corporación por cuanto la orden impartida se refiere a la reubicación en los demás complejos mineros, lo cual no es ajeno a las funciones de la CAR, particularmente lo previsto en el artículo 31 de la Ley 99 de 1993 y demás decretos reglamentarios, así como en el Código de Minas y la propia Constitución Política ya que corresponde a la autoridad ambiental asumir este deber frente a los casos de minería de hecho en el país.

Por ello el cargo no prospera.

Expediente No. 25000-23-27-000-2001-0479-01  
 Acumulados Nos. 2000-0428, 2001-0122, 2001-0343  
 Actor: GUSTAVO MOYA ÁNGEL Y OTROS  
 Acción Popular

14.- APELACIÓN DE LAS SOCIEDADES ALPINA PRODUCTOS ALIMENTICIOS S.A.  
 - ALPINA - ETERNIT COLOMBIANA S.A. - LIQUIDO CARBÓNICO COLOMBIANA  
 S.A. SOCIEDAD CRISTALERÍA PELDAR S.A. - REFINADORA SAL S.A. -  
 REFISAL - CERVECERÍA LEONA S.A. - GRUPO SIDERÚRGICO DIACO S.A.

Plantea el impugnante como problemas a resolver:

**1.- ¿Se han desconocido las garantías al debido proceso y al derecho de defensa, así como la presunción de inocencia y el principio de igualdad al no haberse entregado la copia de la demanda y de sus anexos a las empresas vinculadas?**

El artículo 330 del C. de P.C. dispone: *"Notificación por conducta concluyente. Cuando una parte o un tercero manifieste que conoce determinada providencia o la mencione en escrito que lleve su firma, o verbalmente durante una audiencia o diligencia, si queda constancia en el acta, se considerará notificada personalmente de dicha providencia en la fecha de presentación del escrito o de la audiencia o diligencia"*.

Sobre la notificación por conducta concluyente, la Corte Constitucional<sup>240</sup> expresó:

"Con todo, el legislador ha establecido otras formas subsidiarias de notificación: por estado, en estrados, por edicto y por conducta concluyente. Esta última forma de notificación, en esencia, consiste en que en caso de que la notificación principal, es decir la personal, no se pudo llevar a cabo o se adelantó de manera irregular, pero la persona sobre quien recaen los efectos de la decisión o su defensor, no actuaron en su momento pero lo hacen en diligencias posteriores o interponen recursos o se refieren al texto de la providencia en sus escritos o alegatos verbales, el legislador entiende que en ese caso la persona tuvo conocimiento de la decisión. En tal sentido, la Sala Civil de la Corte Suprema de Justicia, en sentencia del 16 de octubre de 1987 consideró:

---

<sup>240</sup> Sala Plena Corte Constitucional Sentencia C-1076 del 5 de Diciembre de 2002.

**Expediente No. 25000-23-27-000-2001-0479-01**  
**Acumulados Nos. 2000-0428, 2001-0122, 2001-0343**  
**Actor: GUSTAVO MOYA ÁNGEL Y OTROS**  
**Acción Popular**

La notificación por conducta concluyente establecida de modo general en el art. 330 del C.P.C., emerge, por esencia, del conocimiento de la providencia que se le debe notificar a una parte, porque ésta así lo ha manifestado de manera expresa, verbalmente o por escrito, de modo tal que por aplicación del principio de economía procesal, resulte superfluo acudir a otros medios de notificación previstos en la ley. La notificación debe operar bajo estricto marco de dichas manifestaciones, porque en ello va envuelto la protección del derecho de defensa: tanto que no es cualquier conducta procesal la eficaz para inferir que la parte ya conoce una providencia que no le ha sido notificada por alguna de las otras maneras previstas en el ordenamiento.

Así pues, el establecimiento, por el legislador, del mecanismo de la notificación por conducta concluyente constituye una medida razonable y constitucionalmente válida por cuanto garantiza el principio de economía procesal. No obstante, a fin de tutelar el derecho de defensa, la Corte insiste que, en cualquier proceso judicial o administrativo, la notificación personal es la regla general, en tanto que el medio por antonomasia para informarle a una persona el contenido de una determinada providencia que lo afecta, y que por ende, las demás formas de notificación son subsidiarias, su aplicación debe ser restrictiva y ceñida al texto legal, tanto mas cuando se trata de operar una notificación por conducta concluyente debido a que, en no pocos casos, la ausencia de la práctica de la notificación personal es imputable a la falta de debida diligencia y cuidado de la administración"

De conformidad con lo antes mencionado, y teniendo en cuenta que el ente demandado, en el párrafo que antecede no se le hizo entrega personal del auto de 30 de agosto de 2002, dictado dentro de la presente acción, se procederá a dar aplicación a lo establecido en el primer inciso del artículo 330 Ibídem., por lo que se deberá tener por notificada legalmente por conducta concluyente a las mencionadas empresas, más aún cuando la acción por la que se procede pretende amparar los derechos colectivos y en particular el de garantizar un ambiente sano y recuperar la cuenca del río Bogotá y sus afluentes cuya contaminación tiene origen, entre otras causas en

Expediente No. 25000-23-27-000-2001-0479-01  
Acumulados Nos. 2000-0428, 2001-0122, 2001-0343  
Actor: GUSTAVO MOYA ÁNGEL Y OTROS  
Acción Popular

los vertimientos por los usos industriales predicables de las empresas vinculadas al proceso.

***2.- Se contrarían los derechos de acceso a la justicia, debido proceso y derecho de defensa por no haberse resuelto la excepción de legitimidad por pasiva alegada por Cristalería Peldar S.A.?***

No es cierto que el Tribunal de instancia no se haya pronunciado sobre la excepción planteada por el impugnante puesto que dentro de las consideraciones hizo expresa alusión a las excepciones planteadas dentro del proceso y manifestó las razones por las cuales no había lugar a que tales manifestaciones enervaran las pretensiones de la demanda respecto de Cristalería Peldar S.A.

Así lo puso de presente en la parte motiva y la resolutive de la sentencia, previo análisis del tema.

Igualmente como la sociedad se hizo parte dispuso respecto de **CRISTALERÍA PELDAR, REFISAL Y MALTERÍAS DE COLOMBIA S.A.**, que si bien no existen unas propuestas concretas son empresas que deberán continuar con sus procesos de producción hacia la certificación de la Norma ISO 14001. Ello porque las empresas *motu proprio* se hicieron parte en el proceso.

***3.- Procede revocar la condena en costas y exonerar de responsabilidad a dichas empresas?***

La condena en costas será confirmada habrá que determinar el responsable o los responsables de asumir su pago, esto es, si se confirma o no la decisión de instancia.

Expediente No. 25000-23-27-000-2001-0479-01  
 Acumulados Nos. 2000-0428, 2001-0122, 2001-0343  
 Actor: GUSTAVO MOYA ÁNGEL Y OTROS  
 Acción Popular

15. APELACIÓN DE LA SOCIEDAD CONSTRUCTORA PALO ALTO Y CIA S. EN C.

Problemas jurídicos planteados por el apelante:

**1.- Fue notificada la constructora Palo Alto en legal forma y de entenderse surtida la notificación podía el Tribunal de instancia ordenar cancelar los títulos otorgados para la explotación minera legítimamente?**

Dispuso la sentencia en el numeral tercero literales b, c y d:

**b)** De conformidad con la función que el artículo 5 de la Ley 99 de 1993 le adscribe al MAVDT, en el término máximo de tres (3) meses contados a partir de la notificación de esta sentencia, éste debe proceder a delimitar geográficamente en forma clara cuáles son las **zonas excluidas de la minería**, esto es, dónde no podrán ejecutarse trabajos y obras de exploración y explotación minera, según la previsión del artículo 34 de la Ley 685 de 2001 o "Código de Minas" y bajo las directrices señaladas por la Corte Constitucional en la sentencia C-339 de 2002. Para tal efecto, la autoridad minera (que es la que se define y señala en el art. 317 de la citada ley, en principio el Ministerio de Minas y Energía) tiene el deber de colaboración, el cual no limita ni condiciona el ejercicio de la competencia de la autoridad ambiental quien es la que debe establecer tales zonas; **c)** Igualmente, en el término máximo de seis (6) meses contados a partir del vencimiento del plazo fijado en el literal b), el MAVDT con la intervención y colaboración del MINISTERIO DE MINAS Y ENERGÍA debe proceder en consecuencia a revocar y suspender los títulos, permisos, concesiones y licencias de las exploraciones mineras en las zonas de exclusión.; **d)** En el término máximo de seis (6) meses contados a partir de la notificación de esta sentencia, el MVADT, LA CAR y el DAMA y los municipios (en los casos en que hayan sido delegados por la respectiva autoridad ambiental -art. 54 y 55 Ley 99/93-) deberán proceder a adelantar los procesos administrativos tendientes a revocar, las licencias ambientales, los permisos, autorizaciones o concesiones para el uso y aprovechamiento de los recursos naturales y del medio ambiente cuando quiera que no se estén acatando las condiciones y exigencias en ellos establecidas o no se estén cumpliendo de acuerdo con los términos definidos en el acto de su expedición;(...)"

Expediente No. 25000-23-27-000-2001-0479-01  
Acumulados Nos. 2000-0428, 2001-0122, 2001-0343  
Actor: GUSTAVO MOYA ÁNGEL Y OTROS  
Acción Popular

No asiste razón a la Sociedad impugnante puesto que si la misma cuenta con los títulos obtenidos legalmente y dentro de las áreas permitidas para la explotación minera no habrá lugar a dar cumplimiento a la orden impartida por el Tribunal, pues sólo en el evento en que se desconozcan los presupuestos de ley o se incumplan las obligaciones establecidas en la respectiva autorización o licencia, también de conformidad con la ley habrá lugar a revocar los mismos. No hay duda que corresponde a las sociedades que afecten o contaminen el recurso hídrico que además de pagar por concepto de las tasas retributivas y compensatorias contribuir con los procesos de producción más limpia. El Tribunal fue claro al señalar que sólo en el evento de incumplir con las obligaciones impuestas y previo agotamiento del procedimiento respectivo es que podrán revocarse los permisos e imponerse las sanciones a que haya lugar. Por ello los cargos planteados por la impugnante no prosperan.

#### **16. APELACIÓN DE LA SOCIEDAD INDUSTRIAS SPRING S.A.**

A través de escrito fechado el 28 de septiembre de 2004 (fls. 6446 a 6448), el apoderado judicial fundamentó su recurso solicitando:

1. Se excluya del pago de condena en costas y agencias en derecho, lo anterior en razón a su vinculación oficiosa sin que hubiera sido demandada al no realizar ningún proceso de fabricación, transformación o producción que contaminara la represa del Muña o el río Bogotá, porque su proceso era simplemente ensamblaje.

Expediente No. 25000-23-27-000-2001-0479-01  
Acumulados Nos. 2000-0428, 2001-0122, 2001-0343  
Actor: GUSTAVO MOYA ÁNGEL Y OTROS  
Acción Popular

2. Procede la condena en costas en su contra porque ni en la parte motiva se aprobó el pacto de cumplimiento o se hizo alusión a algún tipo de condena, ni tampoco en la parte resolutive se condenó o mencionó a la sociedad, por lo que quedó absuelta de toda responsabilidad?

Al respecto cabe anotar que la sentencia de primera instancia condenó en costas a quienes resultaron condenados en el proceso, luego si la sociedad constructora no fue condenada no le asiste interés jurídico para apelar la sentencia en este sentido.

#### **17. APELACIÓN DE LA SOCIEDAD STANTON & CIA LTDA**

Problema jurídico a resolver:

***1.- Debe ser condenada en costas la sociedad Stanton & Cía. Ltda., a pesar de haber hecho propuesta de pacto de cumplimiento y no haber sido declarada responsable por la contaminación del río Bogotá?***

En efecto la impugnante pone de presente que debe revocarse el numeral primero de la sentencia complementaria en relación con la condena en costas a ella impuesta por haber sido vinculada al proceso aun cuando no fue declarada responsable por la contaminación del río Bogotá. La Sala reitera que la determinación sobre la condena en costas se mantendrá respecto de quienes fueron declarados responsables por el Tribunal de instancia y la cuantía y responsables de su pago será determinada en la parte resolutive de la sentencia.

Expediente No. 25000-23-27-000-2001-0479-01  
Acumulados Nos. 2000-0428, 2001-0122, 2001-0343  
Actor: GUSTAVO MOYA ÁNGEL Y OTROS  
Acción Popular

Igualmente cabe anotar que la aprobación por el Tribunal de lo que denominó pactos de cumplimiento, se limitan a propuestas y compromisos adquiridos por las empresas vinculadas por ser potenciales agentes contaminantes del río Bogotá y quienes además utilizan el recurso en beneficio de sus industrias lo que a su vez genera una corresponsabilidad frente a la protección del recurso.

#### **18. APELACIÓN DE LA SOCIEDAD PAPELES Y CORRUGADOS ANDINA S.A.**

El representante de la sociedad solicita se ratifique la sentencia y el valor jurídico del pacto de cumplimiento propuesto, lo anterior en razón a que tiene todo el valor y la eficacia al ser un mecanismo que concreta la protección de los derechos colectivos por iniciativa de los involucrados en el trámite del proceso.

La apelación se surte respecto de los puntos sobre los cuales hay inconformidad con la sentencia, al solicitar el impugnante que se confirme la misma, no existe interés jurídico para impugnar luego ha de ser declarado improcedente.

#### **19. APELACIÓN DE LA EMPRESA DE ENERGÍA DE BOGOTÁ - E.E.B.**

Problemas jurídicos a resolver:

***1.- Al presentar la E.E.B. un pacto de cumplimiento que fue aprobado en la decisión de instancia, tiene derecho a que los reclamos y pretensiones incoados en su contra sean sustraídos como tema de juzgamiento?***

No hay lugar a acceder a esta solicitud por cuanto como se advirtió en acápite anterior no hubo pacto de

Expediente No. 25000-23-27-000-2001-0479-01  
Acumulados Nos. 2000-0428, 2001-0122, 2001-0343  
Actor: GUSTAVO MOYA ÁNGEL Y OTROS  
Acción Popular

cumplimiento sino acuerdos parciales que se lograron a través de las mesas de trabajo, los cuales fueron modificados por la Magistrada sustanciadora, luego al existir numerosas apelaciones en contra de la decisión de instancia habrá que pronunciarse sobre todo el contenido de la sentencia, reiterando que dada la naturaleza jurídica del pacto de cumplimiento y sus efectos en el proceso adelantado en desarrollo de la acción popular, los acuerdos logrados en la primera instancia son compromisos que adquirieron las entidades vinculadas al proceso pero que no tuvieron vocación de poner fin al proceso y por ende si podían ser cuestionados. Por ello, el Tribunal no sólo modificó de manera unilateral algunas de las propuestas hechas en desarrollo del proceso, sino que además continuó con el trámite y terminó el proceso con sentencia, pasible de impugnación integralmente.

En el presente caso el proceso continuó al no haberse logrado un Pacto de Cumplimiento, razón por la cual se dispuso continuar con la etapa probatoria, la cual una vez precluida dio lugar a que se profiriera una sentencia de fondo.

Es cierto que si el proceso termina con un pacto de cumplimiento por cuanto se ampararon de manera integral los derechos colectivos vulnerados o amenazados, la sentencia que aprueba el pacto de cumplimiento único sólo es susceptible de impugnación por razones de legalidad.

Tampoco puede predicarse la cosa juzgada respecto de los planteamientos hechos por la Empresa de Energía Eléctrica en relación con lo que denominó Pacto de Cumplimiento.

Expediente No. 25000-23-27-000-2001-0479-01  
Acumulados Nos. 2000-0428, 2001-0122, 2001-0343  
Actor: GUSTAVO MOYA ÁNGEL Y OTROS  
Acción Popular

El hecho de suscribir un acuerdo parcial o realizar una propuesta exonera de hacer pronunciamiento de fondo y ser condenado, y de presentarse esta situación como ocurrió en este proceso no puede afirmarse que se lesionaron los derechos al debido proceso y a la defensa, pues se otorgó la oportunidad para alegar de conclusión y ejercer la defensa en audiencia previa al fallo.

Al no tener el carácter de pacto de cumplimiento los compromisos adquiridos por la Empresa de Energía Eléctrica de Bogotá, el análisis en la sentencia versó sobre todos los puntos de hecho y de derecho planteados en el proceso en aras de lograr una solución integral para la cuenca del río Bogotá y superar la violación de los derechos colectivos invocados como afectados en las demandas de acción popular.

***2.- Procede revocar parcialmente la sentencia en lo relacionado con la declaratoria de improcedencia de la denuncia del pleito a la CAR y el llamamiento en garantía de la Aseguradora Colseguros S.A., por cuanto no existía riesgo asegurable ya que cuando se suscribió la póliza ya se había causado el siniestro?***

La Empresa de Energía Eléctrica de Bogotá precisó que no se configura la excepción de mérito propuesta por la aseguradora denominada *"agravación y ocultamiento del riesgo por causas imputables a los interesados"*, en razón a que el siniestro se concreta con la ejecutoria del fallo que declare la responsabilidad civil extracontractual.

Advirtió que tampoco prospera la excepción del *"siniestro no amparado"*, ya que de quedar ejecutoriada la sentencia,

Expediente No. 25000-23-27-000-2001-0479-01  
Acumulados Nos. 2000-0428, 2001-0122, 2001-0343  
Actor: GUSTAVO MOYA ÁNGEL Y OTROS  
Acción Popular

correspondería una indemnización por daños derivados del medio ambiente.

La Aseguradora Colseguros S.A., hoy Seguros Allianz S.A., (fl. 11863) por medio de apoderada puso de presente que en la sentencia de 25 de agosto de 2004, el Tribunal Administrativo de Cundinamarca, Sección Cuarta acogió la excepción presentada denominada INEXISTENCIA DE RIESGO ASEGURABLE. Y negó el llamamiento en garantía, razón por la cual la sociedad fue desvinculada del proceso. Esta decisión se encuentra en firme por cuanto no fue apelada oportunamente por la Empresa de Energía de Bogotá.

***3.- Debe fijarse un incentivo global equivalente a la suma de 50 SMMLV?***

La Empresa sugirió que debe fijarse como incentivo global la suma de 50 s.m.l.m.v. a favor de todos los demandantes porque hubo exceso en la fijación y la regulación porcentual del mismo.

Observó que el artículo 39 de la Ley 472 de 1998 es muy claro al indicar que no se puede exceder de 50 salarios mínimos mensuales y en este caso el incentivo asciende a 200 por ser cuatro los actores, por lo tanto debió fijarse una suma global que no excediera lo autorizado por la ley.

La Sala responde al punto que en el presente caso el incentivo no procede por cuanto fue derogado y se atiene a lo resuelto en Sala Plena al unificar la jurisprudencia sobre el tema.

Expediente No. 25000-23-27-000-2001-0479-01  
Acumulados Nos. 2000-0428, 2001-0122, 2001-0343  
Actor: GUSTAVO MOYA ÁNGEL Y OTROS  
Acción Popular

**20. APELACIÓN DEL DEPARTAMENTO DE CUNDINAMARCA. El apoderado sustenta el recurso en el sentido de:**

- Solicitar la revocatoria del numeral primero de la sentencia complementaria de 16 de septiembre de 2004, por cuanto fue expedida por fuera del término legal.
- Además, no es viable la decisión de condenar en costas al ente territorial por cuanto quedó probado que no omitió sus deberes constitucionales en lo relativo a la conservación del medio ambiente y, por el contrario, ha cumplido con sus obligaciones de acuerdo con los principios de coordinación, complementariedad y concurrencia con los Municipios de la cuenca del río Bogotá.

El cuestionamiento que plantea el Departamento se refiere a la sentencia complementaria que ordenó condenar en costas.

La sentencia complementaria tuvo por objeto resolver el tema de las costas solicitadas por la parte accionante, no resuelto en la sentencia y otros puntos planteados en solicitud de aclaración por los intervinientes en el proceso, facultad que ha previsto el legislador y que debe surtirse dentro de los términos perentorios previstos en la ley. Al haberse hecho la solicitud dentro del término que para el efecto ha establecido el artículo 309 del C. de P.C. procedía el pronunciamiento hecho por el tribunal de instancia.

Expediente No. 25000-23-27-000-2001-0479-01  
Acumulados Nos. 2000-0428, 2001-0122, 2001-0343  
Actor: GUSTAVO MOYA ÁNGEL Y OTROS  
Acción Popular

Sobre los responsables de asumir la condena en costas y el monto se hará un solo pronunciamiento en la parte resolutive de la sentencia.

#### **21. APELACIÓN DEL MUNICIPIO DE NILO**

El apoderado judicial del ente territorial en escrito fechado el 24 de febrero de 2005 (fl. 7050), manifestó que coadyuva en todas sus partes lo expresado por los apelantes sin reserva de ninguna naturaleza.

Estima la Sala que la petición elevada por el municipio fue extemporánea.

#### **22. APELACIÓN DEL SEÑOR JORGE ENRIQUE CUERVO RAMÍREZ**

Mediante escrito allegado al plenario oportunamente, la apoderada judicial del señor Cuervo solicitó:

Señalar en forma precisa el tiempo en que debe cumplir las obligaciones impuestas a la E.A.A.B. enunciadas en el numeral 3º frente a la:

- Recuperación de los ríos interiores de Bogotá y abstención de verter aguas negras a ellos.
- Recuperación de las zonas de ronda de cada una de las quebradas y ríos interiores de Bogotá.

En cuanto a los tiempos en que se deben cumplir las obligaciones impartidas ello será objeto de definición en las conclusiones de la sentencia.

- Determinar con suma claridad el plazo que tiene el Distrito Capital y la E.A.A.B. para separar la

Expediente No. 25000-23-27-000-2001-0479-01  
Acumulados Nos. 2000-0428, 2001-0122, 2001-0343  
Actor: GUSTAVO MOYA ÁNGEL Y OTROS  
Acción Popular

conducción de las aguas lluvias de las aguas negras.

En cuanto a los plazos en que se deben cumplir las obligaciones impartidas, ello será objeto de definición en las conclusiones de la sentencia.

- Revocar las obligaciones de la CAR y los demás municipios relativas al embalse del Muña. Por cuanto en ninguna de las pretensiones de las diferentes demandas se hizo referencia a ellas y por ello no se puede hacer cargo de las obligaciones que le corresponden a particulares.

Las determinaciones relativas al Embalse del Muña también serán objeto de una decisión como parte integral de la solución planteada para la recuperación de la Cuenca del Río Bogotá, para concluir la sentencia.

- Por lo anterior, ordenar a la empresa EMGESA S.A. mantener el embalse durante toda la vida útil del mismo y durante el tiempo que permanezca a su servicio, además de asumir la operación y mantenimiento de las obras.

Las órdenes a EMGESA dependerán de la solución que se plantee en esta sentencia.

- Revocar el numeral que reconoció el incentivo a los actores, por ir en contravía del Decreto 2303 de 1989, artículo 132, y los artículos 1005 y 2360 del Código Civil.

Expediente No. 25000-23-27-000-2001-0479-01  
Acumulados Nos. 2000-0428, 2001-0122, 2001-0343  
Actor: GUSTAVO MOYA ÁNGEL Y OTROS  
Acción Popular

No habrá lugar al reconocimiento del incentivo acorde con la sentencia de unificación de la Sala Plena en cuanto a este tema al considerar que el incentivo desapareció del ordenamiento jurídico y por lo tanto no hay lugar a su reconocimiento y pago.

En relación con el reconocimiento y pago de las costas, la norma que el impugnante estima violada dice:

ARTICULO 2360. <COSTAS POR ACCIONES POPULARES>. Si las acciones populares a que dan derecho los artículos precedentes, se declararen fundadas, será el actor indemnizado de todas las costas de la acción, y se le pagarán lo que valgan el tiempo y la diligencia empleados en ella, sin perjuicio de la remuneración específica que conceda la ley en casos determinados.

La posición del Consejo de Estado en materia de costas en acciones populares es la siguiente:

"(...)Es preciso recordar que las costas constituyen la erogación económica que debe efectuar la parte vencida en un proceso judicial, y están conformadas tanto por las expensas como por las agencias en derecho. Las primeras corresponden a los gastos surgidos con ocasión del proceso y necesarios para su desarrollo, pero distintas al pago de apoderado, esto es, los impuestos de timbre, los honorarios de los auxiliares de la justicia, y en general todos los gastos surgidos en el curso de aquel. Por su parte, las agencias en derecho no son otra cosa que la compensación por los gastos de apoderamiento en que incurrió la parte vencedora que pueden fijarse sin que necesariamente hubiere mediado la intervención directa de un profesional del derecho. Esta Sección en sentencia de 11 de septiembre de 2003 y más recientemente en providencia del 25 de marzo de 2010 se pronunció en relación con la cuestión acá debatida. En esas decisiones se reiteró la aplicación de las reglas contenidas en el Código de

Expediente No. 25000-23-27-000-2001-0479-01  
 Acumulados Nos. 2000-0428, 2001-0122, 2001-0343  
 Actor: GUSTAVO MOYA ÁNGEL Y OTROS  
 Acción Popular

Procedimiento Civil relativas a la condena en costas dentro de los procesos tramitados en ejercicio de la acción popular recalcando que su reconocimiento requiere debida comprobación. En este sentido y revisado el expediente, la Sala encuentra que el actor incurrió en gastos tales como la difusión radial del aviso sobre la admisión de la demanda, que tuvo un valor de \$5.000,00 . Por tanto, se impone adicionar la providencia apelada, ordenando la condena en costas a la parte demandada<sup>241</sup>.

Dentro de este contexto normativo y jurisprudencial no asiste razón al impugnante, puesto que las costas fueron reconocidas en primera instancia a los vencedores en el proceso y respecto de los gastos efectuados por los actores que aparecen acreditados en el proceso, esto es, con un criterio objetivo.

### **23. APELACIÓN DE LOS CIUDADANOS DE SIBATÉ**

Los señores Alba Patricia Guaquetá y Jairo Tovar Barbosa presentaron recurso para que se revisara, revocara y anulara la sentencia de 25 de agosto de 2004, toda vez que se desconocieron los efectos de cosa juzgada que tiene la sentencia del 3 de septiembre de 2002 proferida por el Tribunal Superior del Distrito Judicial de Bogotá, Sala Civil, al haber derogado y exonerado a la E.E.B. y a EMGESA de la responsabilidad por la contaminación del medio ambiente del embalse del Muña.

Comentó que el Tribunal se encontraba impedido de hacer un replanteamiento acerca de la responsabilidad de la Empresa de Energía por haber contribuido a la

---

<sup>241</sup> CONSEJO DE ESTADO, SALA DE LO CONTENCIOSO ADMINISTRATIVO, SECCION PRIMERA, Consejero ponente: MARCO ANTONIO VELILLA MORENO, Bogotá, D.C., nueve (9) de junio de dos mil once (2011), Radicación número: 68001-23-15-000-2003-00933-01(AP).

Expediente No. 25000-23-27-000-2001-0479-01  
Acumulados Nos. 2000-0428, 2001-0122, 2001-0343  
Actor: GUSTAVO MOYA ÁNGEL Y OTROS  
Acción Popular

contaminación de la represa o embalse del Muña, por cuanto la sentencia del señalado 3 de septiembre de 2002 había adquirido el carácter de firmeza sustancial.

La excepción de cosa juzgada es viable proponerla en las acciones populares como argumento del recurso de apelación, por ello procede hacer pronunciamiento.

Resulta importante analizar si puede predicarse la cosa juzgada respecto de la decisión adoptada por el Tribunal Superior del distrito Judicial de Bogotá Sala Civil en sentencia de 3 de septiembre de 2002.

En esa oportunidad la Sala Civil del Tribunal, en sentencia de 3 de septiembre de 2002, revocó la sentencia impugnada y en su lugar i) declaró que la Empresa de Energía Eléctrica de Bogotá contribuyó al deterioro del medio ambiente, ii) tomó medidas para mitigar el impacto ambiental, y iii) absolvió a la aseguradora llamada en garantía, en los siguientes términos:

*"1.Revócase en su integridad la sentencia objeto de apelación.*

*2.En su lugar DECLARASE que la empresa de ENERGIA ELECTRICA DE BOGOTA, contribuyó con el represamiento de las aguas del río Bogotá, conocido como el Embalse del Muña, al deterioro del medio ambiente correspondiente al municipio de Sibaté.*

*3. Como consecuencia de lo anterior y con el fin de procurar un ambiente sano a los habitantes de dicha localidad, ORDENASE a la Empresa demandada proceder a adoptar las medidas técnicas y jurídicas necesarias para que en el término de 24 meses observando las disposiciones legales existentes, entre ellos los decretos 1594/84 y 2105/83. Rebajar niveles de contaminación (sic).*

Expediente No. 25000-23-27-000-2001-0479-01  
Acumulados Nos. 2000-0428, 2001-0122, 2001-0343  
Actor: GUSTAVO MOYA ÁNGEL Y OTROS  
Acción Popular

*Si vencido ese plazo el resultado propuesto no se ha obtenido, prohíbesele a la Empresa de Energía Eléctrica de Bogotá, la concentración y utilización de las aguas del Río Bogotá para la generación de energía.*

*4. CONFORMAR, bajo la coordinación inicial del señor Juez Cuarto Civil del Circuito de esta ciudad, el Comité de Vigilancia compuesto por las partes, un representante del Ministerio del Medio Ambiente, un representante del Municipio de Sibaté, La Corporación Autónoma Regional de Cundinamarca -Regional Sabana de Occidente-, el Ministerio Público, la Organización No Gubernamental Corporación Ecofondo y un Delegado del Defensor del Pueblo en asuntos ambientales.*

*5. DECLARASE impróspera la objeción formulada por la parte accionada al dictamen pericial.*

*6. ABSUELVASE a la sociedad LA NACIONAL COMPAÑÍA DE SEGUROS GENERALES DE COLOMBIA de las pretensiones contenidas en el llamamiento de garantía realizado por la EMPRESA DE ENERGIA ELECTRICA DE BOGOTA a la sociedad. El Juzgado de Origen, dé cumplimiento a lo dispuesto en el artículo 80 de la Ley 472/98.*

*7. DECLARESE que no hay lugar a disponer recompensa alguna a favor del actor."*

Al respecto cabe anotar que en materia de acciones populares si bien es cierto que la decisión que se adopte hace tránsito a cosa juzgada respecto de las pretensiones planteadas en la demanda, el objeto de la acción popular es, de conformidad con lo establecido en la Ley 472 de 1998, la de "evitar el daño contingente, hacer cesar el peligro, la amenaza, la vulneración o agravio sobre los derechos e intereses colectivos, o restituir las cosas a su estado anterior cuando fuere posible".

En el presente caso, a pesar de haberse condenado a la Empresa de Energía de Bogotá, EMGESA en virtud de la

Expediente No. 25000-23-27-000-2001-0479-01  
 Acumulados Nos. 2000-0428, 2001-0122, 2001-0343  
 Actor: GUSTAVO MOYA ÁNGEL Y OTROS  
 Acción Popular

sentencia transcrita, posteriormente fue vinculada al presente proceso como empresa administradora del Embalse del Muña y en razón a que el Embalse del Muña continúa siendo factor contaminante del río Bogotá y generando impacto ambiental en el municipio de Sibaté, no han cesado definitivamente las acciones que vulneran los derechos e intereses colectivos (art. 11<sup>242</sup> y 35<sup>243</sup>, Ley 472 de 1998).

En sentencia C-622-07 la Corte Constitucional, declaró la constitucionalidad condicionada del artículo 35 de la Ley 472 de 1998, *"en el entendido que las sentencias que resuelven los procesos de acción popular hacen tránsito a cosa juzgada respecto de las partes y del público en general, salvo cuando surjan con posterioridad a la sentencia desestimatoria, nuevas pruebas trascendentales que pudieran variar la decisión anterior"* y por considerar que:

*En los procesos donde se persigue la protección de derechos colectivos socialmente relevantes, caracterizados por una titularidad difusa, cerrar por completo cualquier posibilidad a la comunidad para que pueda defender judicialmente sus intereses, sin atender a las circunstancias que han motivado una decisión anterior, pone en entredicho el ejercicio eficaz de los derechos colectivos y, además, hace inoperante el mecanismo de defensa judicial que la propia Constitución del 91 instituyó para brindarles una protección real y efectiva.(...)*

---

<sup>242</sup> Artículo 11.- La Acción Popular podrá promoverse durante el tiempo que subsista la amenaza o peligro al derecho e interés colectivo.

<sup>243</sup> ARTICULO 35. EFECTOS DE LA SENTENCIA. <Artículo CONDICIONALMENTE exequible> La sentencia tendrá efectos de cosa juzgada respecto de las partes y del público en general.

Expediente No. 25000-23-27-000-2001-0479-01  
Acumulados Nos. 2000-0428, 2001-0122, 2001-0343  
Actor: GUSTAVO MOYA ÁNGEL Y OTROS  
Acción Popular

En estos términos y teniendo en cuenta que EMGESA ha participado de manera activa en desarrollo de la presente acción popular sin que haya hecho manifestación alguna en este sentido, esta Sala estima que la excepción no tiene vocación de prosperidad puesto que el derecho colectivo que se invoca como violado no se ha restablecido y será en esta sentencia que se resuelva sobre si EMGESA ha cumplido con sus obligaciones frente a la administración del Embalse del Muña y la afectación por sus efectos contaminantes frente al ambiente.

**24. APELACIÓN DE LOS HABITANTES DE SIBATÉ - OSCAR GUAQUETA BELLO, RAMIRO ORLANDO RAMÍREZ PRIETO, VÍCTOR JULIO SANDOVAL ZAMUDIO**

Los habitantes de Sibaté representados por los firmantes del escrito allegado al proceso solicitaron se revoque el artículo 1º de la sentencia de 25 de agosto de 2004, en donde se declara a los habitantes del municipio de Sibaté como responsables solidarios por acción en la causación de la catástrofe ecológica del río Bogotá (cuenca baja) y el embalse del Muña.

En estos términos solicitan que la Corporación: i) adicione la sentencia incorporando los verdaderos actores del desastre ecológico del Embalse del Muña; ii) declare la responsabilidad de la E.E.B. y de EMGESA S.A., propietaria del embalse del Muña, por la catástrofe ecológica causada tanto allí como en el municipio de Sibaté e impongan las condenas correspondientes; iii) que en forma subsidiaria se *desacumule* la acción popular No 01-479, relativa al problema ambiental del embalse del Muña de las acciones populares relacionadas con el problema ambiental del río Bogotá, ya que son diferentes los problemas de contaminación del medio ambiente planteados en una y otra acción popular.

Expediente No. 25000-23-27-000-2001-0479-01  
Acumulados Nos. 2000-0428, 2001-0122, 2001-0343  
Actor: GUSTAVO MOYA ÁNGEL Y OTROS  
Acción Popular

La responsabilidad atribuida a los habitantes del municipio de Sibaté se deriva de la contaminación que desde la fuente generan los habitantes; las aguas residuales domésticas, agrícolas e industriales generan contaminación a las aguas que llenan el Embalse del Muña; la responsabilidad de EMGESA y de la EEB será determinada en la sentencia, quien no es propietario del embalse sino que lo administra, con el objeto de generar la energía eléctrica y para lo cual obtuvo la concesión correspondiente. Resulta improcedente la solicitud de no acumular los procesos por cuanto la problemática que es objeto de la acción popular comprende a toda la cuenca del Río Bogotá y sus afluentes y lo que se pretende es lograr obtener una solución integral, incluyendo la problemática de Sibaté por la contaminación ambiental derivada del Embalse del Muña y la contaminación de las aguas que lo alimentan.

#### **25. APELACIÓN DE LA FUNDACIÓN AMIGOS DEL PLANETA**

El apoderado de la fundación presentó recurso de apelación contra la sentencia proferida por el Tribunal Administrativo de Cundinamarca, al efecto solicitó que se declare a las empresas EMGESA y E.E.B. S.A, como responsables de acción u omisión de la contaminación del embalse del Muña, por trasvasar y utilizar durante varios años las aguas contaminadas del río Bogotá en generación de energía eléctrica, sin ser debidamente tratadas, produciendo impactos ambientales negativos sobre el medio ambiente y la salud de los habitantes de los alrededores.

Pidió que se les obligue a descontaminar la totalidad del mismo embalse y no en la forma superficial como

Expediente No. 25000-23-27-000-2001-0479-01  
Acumulados Nos. 2000-0428, 2001-0122, 2001-0343  
Actor: GUSTAVO MOYA ÁNGEL Y OTROS  
Acción Popular

presentaron en el pacto de cumplimiento aprobado por la sentencia apelada.

Además, requiere para que se ordene la conformación de un panel de expertos, para definir si la expansión de la zona norte de la ciudad de Bogotá era o no viable, y en esta forma poder evaluar y tomar la mejor de las alternativas de saneamiento del río Bogotá.

Comentó que la figura de los pactos de cumplimiento debe ser mantenida y que se deben crear mecanismos para que los mismos puedan ser modificados para una mejor recuperación de los ecosistemas afectados.

Frente a estas apreciaciones cabe anotar que la definición de la responsabilidad de EMGESA será objeto de análisis en esta sentencia, así como el examen de la alternativa para lograr el saneamiento de la Cuenca del Río Bogotá.

De otro lado solicitó lo siguiente:

-Que se ordene al Ministerio de Ambiente, Vivienda y Desarrollo Territorial acoger el nuevo esquema de tratamiento de aguas residuales del Distrito.

-Que se ordene realizar un diagnóstico ambiental de alternativas el cual deberá hacerse por una entidad independiente a la E.A.A.B., que tenga suficiente criterio técnico y científico y realice consultas públicas y mesas técnicas con expertos de diferentes universidades de Bogotá.

Expediente No. 25000-23-27-000-2001-0479-01  
Acumulados Nos. 2000-0428, 2001-0122, 2001-0343  
Actor: GUSTAVO MOYA ÁNGEL Y OTROS  
Acción Popular

-Que se defina el papel que tendrá el embalse del Muña en el esquema del saneamiento del Distrito y que se incluyan los costos del manejo del embalse en la comparación de alternativas.

-Que se incluyan los costos de manejo y operación del embalse del Muña y que sean recalculados a partir de los nuevos estudios.

-Que se realice de nuevo el análisis económico comparativo de las alternativas de saneamiento del Distrito Capital.

-Que se ordene optimizar las plantas de tratamiento de aguas residuales de los municipios de la cuenca del río Bogotá, construyendo sus lagunas de maduración o sistemas de pulimiento.

-Que se construyan mecanismos de desinfección para los efluentes de las plantas ya que las concentraciones de coniformes son muy altas y debido a esto el río Bogotá no es apto para el riego de ningún tipo.

-Que las autoridades ambientales, municipales y locales ordenen a los agricultores, floricultores y ganaderos de la cuenca del río de Bogotá, que traten el agua mediante mecanismos para tratamiento de aguas descargas difusas.

-Que se ordene a las autoridades competentes, industrias y organizaciones sociales promover una campaña de comunicación educativa que busque modificar la conducta de los ciudadanos como contaminadores involuntarios del río Bogotá.

Indicó que no tiene sentido hacer una inversión tan cuantiosa en la solución técnica integral, si no se logran los usos adicionales del río al estético y

Expediente No. 25000-23-27-000-2001-0479-01  
Acumulados Nos. 2000-0428, 2001-0122, 2001-0343  
Actor: GUSTAVO MOYA ÁNGEL Y OTROS  
Acción Popular

agrícola restringido, por lo que es necesario establecer plazos.

Finalmente, comentó que el pacto presentado por la EEEB y EMGESA, habla de remoción de lodos del embalse pero no en qué cantidades y en qué zonas, por lo que solicitó se determine tal circunstancia.

Todas estas observaciones hechas por el apelante, más que una manifestación de disenso con la sentencia constituye reflexiones o planteamientos que habrán de ser analizados y tenidos en cuenta para adoptar la solución integral por la contaminación del río Bogotá, objeto de la presente sentencia.

#### **26. APELACIÓN DE LA PROCURADURÍA GENERAL DE LA NACIÓN**

Solicita el Agente del Ministerio Público acreditado en el proceso:

- Desestimar las excepciones de mérito propuestas por los demandados y declarar solidariamente responsables de la contaminación del río Bogotá y sus afluentes, a los demandados.

Las excepciones planteadas por los demandados fueron resueltas frente a los planteamientos hechos por cada uno de ellos y en efecto fueron desestimadas por el Tribunal de instancia, decisión que será confirmada en la segunda instancia, de conformidad con los argumentos expuestos para resolver los recursos de apelación en que fueron invocadas.

Expediente No. 25000-23-27-000-2001-0479-01  
Acumulados Nos. 2000-0428, 2001-0122, 2001-0343  
Actor: GUSTAVO MOYA ÁNGEL Y OTROS  
Acción Popular

En la parte resolutive y de conclusiones se establecerá si se confirma la decisión de instancia de declarar solidariamente responsables a los demandados en este proceso.

- Se amparen los derechos colectivos a un ambiente sano, a la salubridad pública y a la eficiente prestación de los servicios públicos domiciliarios de los procesos acumulados.
- Para lograr la descontaminación del río Bogotá y sus afluentes se deben observar las siguientes directrices en cuanto a la realización de obras:
  - Control de vertimientos de aguas residuales y ejecución del programa de producción más limpia en los siguientes sectores de producción: Industria casera, grande, mediana y pequeña, implementado por la CAR y el DAMA, siguiendo las políticas del MAVDT, con el control de los municipios el DISTRITO CAPITAL y el DEPARTAMENTO DE CUNDINAMARCA.
  - En un término máximo de 3 meses contados a partir de la notificación de esta sentencia, el MAVDT deberá proceder a delimitar de forma clara, cuales son las zonas excluidas de la minería, en donde no podrán realizarse trabajos y obras de exploración y explotación minera. Sentencia C-339/02.
  - En un término máximo de 6 meses contados a partir de la notificación de esta sentencia, el MAVDT en colaboración con el MINISTERIO DE MINAS Y ENERGIA, adelantarán los procesos

Expediente No. 25000-23-27-000-2001-0479-01  
Acumulados Nos. 2000-0428, 2001-0122, 2001-0343  
Actor: GUSTAVO MOYA ÁNGEL Y OTROS  
Acción Popular

administrativos tendientes a revocar y suspender los títulos, permisos, concesiones y licencias de las explotaciones mineras.

- En un término máximo de 6 meses contados a partir de la notificación de esta sentencia, el MAVDT, la CAR, el DAMA y los municipios. Ley 99/93 Art. 54-55. adelantarán los procesos administrativos tendientes a revocar, las licencias ambientales, los permisos, autorizaciones o concesiones para el uso y aprovechamiento de los recursos naturales y el medio ambiente.
- En un término máximo de 6 meses contados a partir de la notificación de esta sentencia, el MAVDT, la CAR, el DAMA y los municipios, deberán exigir a los particulares, entes públicos o privados a los que se les haya otorgado licencias ambientales, autorizaciones, permisos o concesiones a cielo abierto, la reestructuración o sustitución morfológica y ambiental de todo el suelo intervenido en la explotación. Los beneficiarios de estas licencias deberán en un término de 4 meses siguientes a la fecha en que sean requeridos a realizar la respectiva reestructuración.
- Se previene a la CAR y al DAMA y a los demás órganos ambientales, que no podrán invertir los recursos destinados para saneamiento ambiental en programas de reforestación.
- Las familias que se encuentran lavando arenas en el río TUNJUELO, LA CAR, EL DAMA, Y EL

Expediente No. 25000-23-27-000-2001-0479-01  
Acumulados Nos. 2000-0428, 2001-0122, 2001-0343  
Actor: GUSTAVO MOYA ÁNGEL Y OTROS  
Acción Popular

MINISTERIO DE MINAS Y ENERGIA, deberán reubicarlos en los demás complejos mineros.

- El DISTRITO CAPITAL, el DEPARTAMENTO DE CUNDINAMARCA, y la BENEFICENCIA DE CUNDINAMARCA, deberán dar prioridad a los programas sociales y educativos de esta comunidad.
- El MINISTERIO DE AGRICULTURA Y DESARROLLO RURAL, y el MINISTERIO DE LA PROTECCION SOCIAL, deberán promover una política restrictiva sobre el riego de cultivos y brebaje de ganado con aguas del río Bogotá y sus afluentes y del embalse del muña.
- El incumplimiento de estas órdenes dará lugar a la compulsa de copias ante la Fiscalía General de la Nación.
- El Alcalde Mayor de Bogotá y los alcaldes municipales deben implementar, controlar, y retener los productos agrícolas, el ganado mayor y menor y los productos pecuarios que se están alimentando con las aguas o pastos contaminados por el río Bogotá y el embalse del Muña.
- Creación de una sola red Hidrometereológica y estación de monitoreo de las aguas, direccionadas por el INSTITUTO DE HIDROLOGÍA METEREOLÓGÍA Y ESTUDIOS AMBIENTALES, para toda el área de la cuenca del río Bogotá y de sus afluentes, con la constitución de un fondo común económico y con el aporte de los recursos que para estos casos dispongan en sus presupuestos.

Expediente No. 25000-23-27-000-2001-0479-01  
Acumulados Nos. 2000-0428, 2001-0122, 2001-0343  
Actor: GUSTAVO MOYA ÁNGEL Y OTROS  
Acción Popular

- El DISTRITO CAPITAL - DAMA- la E.A.A.B. y las cuencas alta, media y baja del río Bogotá, con la dirección y coordinación de la CAR y el DEPARTAMENTO DE CUNDINAMARCA, deberán llevar un control de vertimientos de aguas domésticas, especialmente de grasas, carbohidratos, nitratos y fosfatos. El INVIMA y el MAVDT, en el término de la presente o siguiente legislatura, deberá presentar un proyecto de ley ante el Congreso, para prohibir la fabricación y uso de los detergentes que contengan fosfatos y se reglamente la producción de detergentes biodegradables con el fin de detener el proceso eutrofización de las aguas.
- El MINISTERIO DE EDUCACION NACIONAL deberá incluir los PRAES en la educación primaria, media, tecnológica y superior como cátedra obligatoria. La CAMARA DE COMERCIO DE BOGOTÁ, el DAMA y los que se quieran vincular a las cajas de compensación COMFENALCO, podrán colaborar con la ejecución de este programa para incentivar en la comunidad el propósito común de descontaminar el río Bogotá y sus afluentes mediante prácticas limpias. Para lo cual el canal institucional de televisión realizará propagandas.
- Para reforzar el control de los vertimientos y la vigilancia sobre los cerros, montañas, laderas, suelos y aguas de la sabana, el MAVDT y el MINISTERIO DE DEFENSA, deberán apoyar

Expediente No. 25000-23-27-000-2001-0479-01  
Acumulados Nos. 2000-0428, 2001-0122, 2001-0343  
Actor: GUSTAVO MOYA ÁNGEL Y OTROS  
Acción Popular

mediante la prestación de servicio militar obligatorio ambiental.

- El DEPARTAMENTO DE CUNDINAMARCA, la CAR y la BENEFICENCIA DE CUNDINAMARCA, tienen bajo su responsabilidad el control de los procesos de producción más limpia de las curtiembres de VILLAPINZON y CHOCONTA. El MAVDT Y EL MINISTERIO DE COMERCIO EXTERIOR dentro del máximo de un año contado a partir de la notificación de la sentencia deberá cofinanciar todas las obras de infraestructura que requieran dichos procesos de producción más limpia.
- El DISTRITO CAPITAL - DAMA- en coordinación con los ministerios dentro del máximo de un año contado a partir de la notificación de la sentencia deberán poner en funcionamiento el PARQUE DE COEFICIENTE INDUSTRIAL DE LAS CURTIEMBRES DE SAN BENITO o implementar en cada una de las industrias los procesos de producción más limpia.
- Los municipios de Cuencas Alta y Media y la E.A.A.B. de conformidad con los POT velarán por la recuperación y por la protección de las zonas de ronda, de las quebradas y afluentes del río Bogotá.
- Los municipios y el distrito deberán expedir en el término de 6 meses la reglamentación de los usos del suelo.
- Las contralorías departamentales, distritales y de la Nación deberán controlar los recursos con

Expediente No. 25000-23-27-000-2001-0479-01  
 Acumulados Nos. 2000-0428, 2001-0122, 2001-0343  
 Actor: GUSTAVO MOYA ÁNGEL Y OTROS  
 Acción Popular

destino al saneamiento ambiental previstos en la ley.

- Los gremios de la producción que ejerzan actividades en la cuenca del río Bogotá y sus afluentes deberán ingresar a los procesos de producción más limpia que promuevan la CAR y el DAMA.
- Se ordena a los ministerios de PROTECCION SOCIAL, DE MINAS Y ENERGÍA, DE COMERCIO EXTERIOR, DE AGRICULTURA, Y EDUCACIÓN, al DEPARTAMENTO NACIONAL DE PLANEACION para que planeen y ejecuten con el MAVDT, todos los programas relacionados con las funciones del Art. 5 de la ley 99 de 1993.
- Se ordena a la CAR y al DAMA a que formen un grupo de guardabosques según lo previsto en el POMCO.
- Los municipios deberán dar cumplimiento a la sentencia proferida por el tribunal.
- La CAR, el DAMA, la E.A.A.B. y los municipios, deberán velar por la adecuada destinación de los recursos para la adquisición de los predios para proteger las fuentes hídricas. Las Contralorías distritales, departamentales y de la Nación deberán ejercer control fiscal en los recursos para saneamiento ambiental.
- Los alcaldes locales del distrito deberán controlar los vertimientos.
- El Fondo Nacional de Regalías y el M.H.C.P. deberán realizar las reservas por concepto de regalías a los municipios y distritos

Expediente No. 25000-23-27-000-2001-0479-01  
Acumulados Nos. 2000-0428, 2001-0122, 2001-0343  
Actor: GUSTAVO MOYA ÁNGEL Y OTROS  
Acción Popular

- Se declara que la descontaminación del río Bogotá y sus afluentes comprende la ejecución de obras.
- Los municipios como distrito Capital deberán separar las redes pluviales de las de alcantarillado desde el mismo momento de su diseño.
- Dentro del término máximo de 3 años a partir de la audiencia del pacto de cumplimiento la CAR deberá realizar las obras y las mejoras que requieran las plantas de tratamiento.
- El IDEAM deberá realizar la caracterización física, química y biológica a la entrada y salida de las plantas de tratamiento de aguas residuales, luego de ser puestas en óptimas condiciones para entregar a los municipios.
- Los Municipios deberán construir las plantas de tratamiento que se requieran para dar total cobertura al tratamiento de sus aguas residuales. El Municipio de Villapinzón en el término de tres años a partir de la notificación de la sentencia deberá construir su planta de tratamiento.

En relación con estos criterios la Sala los analizará y tendrá en cuenta al momento de proferir la decisión en esta sentencia.

#### **AMPLIACION DEL RECURSO DE APELACION**

El Ministerio Público además solicitó: Se revoquen, modifiquen o reformen algunos apartados del fallo proferido por el juez de primera instancia, para hacer

Expediente No. 25000-23-27-000-2001-0479-01  
Acumulados Nos. 2000-0428, 2001-0122, 2001-0343  
Actor: GUSTAVO MOYA ÁNGEL Y OTROS  
Acción Popular

efectivo el derecho fundamental de acceso integral a la Administración de Justicia y la garantía del debido proceso, al derecho de defensa de las partes y el equilibrio de las mismas.

En cuanto a los pactos de cumplimiento, el fallo de 25 de agosto y su complementario no es una sentencia anticipada sino definitiva, por esta razón las propuestas discutidas que hacen parte de los medios probatorios documentales son aptas e idóneas para que el juez de primera instancia profiera el fallo y el de segunda instancia adopte la decisión que corresponda una vez sean apreciados en conjunto.

En relación con la constitución del FONDO COMUN ECONOMICO para la creación de una sola red hidrometereológica, carece de soporte jurídico, según estima el Ministerio Público, nuestro Estado social de derecho se caracteriza porque ninguna autoridad estatal pueda ejercer funciones distintas a las que le atribuyen la Constitución y la ley. Por lo anterior **debe revocarse** este punto y en su defecto reformarse para que su creación, funcionamiento y finalidad se enmarquen dentro del ordenamiento jurídico vigente.

Estos aspectos serán objeto de las conclusiones de la sentencia, y en relación con la cosa juzgada reiteramos los argumentos que ya dejamos plasmados, acorde con la impugnación efectuada por el Ministerio Público.

**27.- ALFONSO PÉREZ PRECIADO, quien interviene en calidad de** coadyuvante, reconocido dentro del proceso en memorial radicado el 8 de septiembre de 2004 (fl. 6244), por medio

Expediente No. 25000-23-27-000-2001-0479-01  
Acumulados Nos. 2000-0428, 2001-0122, 2001-0343  
Actor: GUSTAVO MOYA ÁNGEL Y OTROS  
Acción Popular

de apoderado judicial y posteriormente directamente, radica escrito el 24 de febrero de 2005, y sustenta el recurso de apelación (fl. 7188), así:

Cuestiona la NO responsabilidad del D.C. -EAAB, al haberse aprobado sus propuestas de Pacto de Cumplimiento lo cual hace que la decisión resulte inane, razón por la cual solicita corregir defectos de la sentencia y simplificar los procedimientos, redefinir responsabilidades y tareas, acorde con las normas vigentes.

Expone como fundamento de su solicitud que la ciudad de Bogotá D.C. es responsable del 97% de la carga orgánica vertida al río; no se ha demostrado que el D.C. haya cumplido con el pago de la tasa retributiva a la CAR; el D.C. viene incumpliendo el Decreto 619/00 y la Resolución 817 de 1996; el Tribunal se convirtió en autoridad ambiental al aprobar un nuevo programa de saneamiento en reemplazo del previsto en el Decreto 619/00; el Tribunal declara responsables por acción a los habitantes de la Cuenca cuando son las empresas de servicios públicos las encargadas del manejo de los residuos y de su tratamiento.

La sentencia no es clara en definir la autoridad ambiental del río y la distribución que hace de las funciones genera duplicidad y conflictos institucionales; la responsabilidad en la financiación está en cabeza del D.C. y no de la CAR, el cual no ha cumplido sus obligaciones con el Fondo cuenta y dar por terminado el contrato 015/94, no se ejecutaron los recursos en la forma prevista.

Expediente No. 25000-23-27-000-2001-0479-01  
Acumulados Nos. 2000-0428, 2001-0122, 2001-0343  
Actor: GUSTAVO MOYA ÁNGEL Y OTROS  
Acción Popular

Agrega que para mostrar un tratamiento realmente notorio es necesario mantener la meta del tratamiento secundario en corto plazo, tanto en los planes municipales como en el D.C.

El Tribunal no tuvo en cuenta en su decisión el Decreto 1594/84 para vertimientos razón por la cual solicita se corrija en segunda instancia.

Solicita que en la PTAR Salitre se alcance por lo menos un caudal disponible de 13 m<sup>3</sup>/s o un caudal equivalente al promedio histórico multianual.

Se evalúe el costo de operación y el riesgo de contingencias por sedimentación no es viable conducir aguas residuales a través de un gran interceptor enterrado.

La sentencia no determina el monto a financiar por cada una de las entidades y los montos contemplados resultan inequitativos e insostenibles (Ley 715), tarifas al alcantarillado, sobretasa CAR, tasas retributivas, transferencias sector eléctrico.

Frente a estos argumentos la Sala hará el pronunciamiento sobre la solución integral a la contaminación de la Cuenca del río Bogotá que necesariamente incluye la solución técnica y las responsabilidades a cargo de las diferentes autoridades del orden nacional, departamental, regional y municipal, así como los aspectos financieros y ambientales acorde con la Constitución Política y la ley.

Expediente No. 25000-23-27-000-2001-0479-01  
Acumulados Nos. 2000-0428, 2001-0122, 2001-0343  
Actor: GUSTAVO MOYA ÁNGEL Y OTROS  
Acción Popular

**28. Fabio Roberto Pérez Jaimes**, (fl. 6249), en su calidad de perito ingeniero designado dentro del proceso de la referencia, interpuso recurso de apelación radicado el 8 de septiembre de 2004, con el objeto de que se revoque la sentencia en lo atinente al no reconocimiento de los honorarios por el dictamen pericial elaborado y presentado el 8 de octubre de 2001, según lo expresado en el numeral 6.17 de la parte motiva de la sentencia.

Fundamenta su solicitud en que una vez realizado el análisis de los estudios relacionados en el memorial de impugnación, efectuadas las consultas y visitas técnicas se procedió a dar respuesta al cuestionario presentado por el actor popular.

Agrega que no es cierto como lo afirma la sentencia, que los estudios y las asesorías datan de hace más de diez años, pues algunos son recientes y datan de 1999 hacia adelante. Manifiesta que el trabajo realizado fue serio e implicó estudio e investigación sobre el tema, así como visitas técnicas al embalse del Muña, Sibaté y su entorno.

Tampoco considera acertado que la Magistrada haya señalado que el dictamen fue presentado tardíamente por cuanto el mismo fue radicado el 8 de octubre de 2001, dentro del mismo año en que fue designado y posesionado según consta en el expediente.

El Tribunal de instancia sobre la negativa de reconocer honorarios al perito designado manifestó:

Expediente No. 25000-23-27-000-2001-0479-01  
Acumulados Nos. 2000-0428, 2001-0122, 2001-0343  
Actor: GUSTAVO MOYA ÁNGEL Y OTROS  
Acción Popular

6.17. (...) dejando claro que las objeciones al dictamen pericial presentado por FABIO ROBERTO PÉREZ Y JOSÉ MANUEL GONZÁLEZ NAVARRO quienes con los mismos criterios de las investigaciones adelantadas por la UNIÓN TEMPORAL y las demás entidades expertas en el tema, en los cuales se basaron para poner de presente las condiciones anóxicas de las aguas que se trasvasan al EMBALSE DEL MUÑA, pero que con relación a la alternativa para la solución de la descontaminación se refieren a los estudios que en el año 1993 realizó la EPAM para dictaminar sobre la necesidad de la construcción de las restantes Plantas de Tratamiento a la altura de los RÍOS FUCHA Y TUNJUELO, aspecto este que quedó dilucidado por las conclusiones a las que llegaron quienes integraron la MESA DE SOLUCIÓN TÉCNICA INTEGRAL DEL RÍO BOGOTÁ, esto es la de dos plantas, alternativa acogida en atención a las condiciones cambiantes de la CUENCA y que por lo demás fue contemplada en los estudios de la EPAM entre otras, por lo que en ese aspecto prospera la objeción, no como un error grave de parte de los peritos sino como valoración de las pruebas de la que le merece mejor grado de convicción (...) para acoger los estudios de los expertos allegados por las partes y no la prueba que tardíamente y después del transcurso de más de diez años desde que se inició el proceso vienen a presentar quienes fueron designados por el juzgado que inicialmente conoció del proceso, prevaleciendo de los estudios de los demás entes, más no por un trabajo de investigación como se advierte de los argumentos que exponen en su experticio, razón que conduce a la Sala a no reconocer en su favor los honorarios por un trabajo realizado a expensas, se insiste de unos estudios ya elaborados.

Al respecto cabe anotar que el dictamen pericial rendido por los Auxiliares de la Justicia Ingenieros, FABIO ROBERTO PÉREZ Y JOSÉ MANUEL GONZÁLEZ, se tuvo como prueba, experticia que fue decretada inicialmente por el JUZGADO SEGUNDO CIVIL DEL CIRCUITO dentro de la acción popular instaurada por GUSTAVO MOYA ÁNGEL, pero en atención a la remisión del expediente al Tribunal Administrativo por dicho despacho, sólo fue presentado ante esta Corporación el día 8 de octubre de 2003, y del

Expediente No. 25000-23-27-000-2001-0479-01  
Acumulados Nos. 2000-0428, 2001-0122, 2001-0343  
Actor: GUSTAVO MOYA ÁNGEL Y OTROS  
Acción Popular

cual se corrió traslado a las partes en proveído de fecha 27 de noviembre siguiente, contra el cual se presentaron objeciones.

Por auto de 18 de febrero de 2004 (fls. 4430-4435 c.p. No. 8), se negó la objeción por error grave del dictamen pericial impetrada por EMGESA y por el MUNICIPIO DE SIBATÉ (fls. 4384-4394 y 4403-4414 c.p. No. 8), como también no se accedió a la solicitud de aclaración y complementación del dictamen presentado por la CAR en atención a que los puntos sobre los que se elevaron las peticiones eran más de valoración probatoria en la sentencia.

Dentro de estos lineamientos se puede establecer que lo que motivó la negativa del pago de los honorarios fue la entrega tardía de la experticia, después de que se habían adelantado las mesas de trabajo y allegado los documentos que contenían la información que en ella se consignaron.

Sin embargo, en materia de honorarios de peritos su régimen se encuentra regulado en el Código de Procedimiento Civil, artículo 239<sup>244</sup> modificado por el artículo 25 de la Ley 794 de 2003 y en el Acuerdo 1518 de

---

<sup>244</sup> ARTÍCULO 239. HONORARIOS DEL PERITO. <modificado por el artículo 25 de la Ley 794 de 2003.> En el auto de traslado del dictamen se señalarán los honorarios del perito de acuerdo con la tarifa oficial y lo que de ellos deba pagar cada parte. En el caso de que se requieran expertos de conocimientos muy especializados, el juez podrá señalarles los honorarios sin limitación alguna, teniendo en cuenta su prestancia y las demás circunstancias del caso. Antes del vencimiento del traslado del escrito de objeciones, el objetante deberá presentar al juzgado los títulos de los depósitos judiciales, los cuales se le entregarán al perito sin necesidad de auto que lo ordene, una vez cumplida la aclaración o complementación ordenada y siempre y cuando no prospere alguna objeción que deje sin mérito el dictamen.

Expediente No. 25000-23-27-000-2001-0479-01  
 Acumulados Nos. 2000-0428, 2001-0122, 2001-0343  
 Actor: GUSTAVO MOYA ÁNGEL Y OTROS  
 Acción Popular

2002, artículo 36, disposiciones según las cuales hay lugar a fijar los honorarios de los peritos, siempre y cuando en el término de traslado del dictamen no se hubieren presentado objeciones en su contra o éstas no hayan prosperado, así como tampoco las solicitudes de adición o aclaración de dicha prueba, teniendo en cuenta los criterios fijados en el artículo 36<sup>245</sup> del Acuerdo 1518 de 2002 del Consejo Superior de la Judicatura, "*por medio del cual se establece el régimen y los honorarios de los Auxiliares de la Justicia*", contrario a lo dispuesto por el Tribunal de instancia, habrá lugar a reconocer y pagar a los señores FABIO ROBERTO PÉREZ Y JOSÉ MANUEL GONZÁLEZ quienes se desempeñaron como peritos en el proceso de la referencia, la suma correspondiente a tres (3) salarios mínimos legales mensuales vigentes a cada uno, que deberán cancelarse por los demandantes por partes iguales. Razón por la cual habrá lugar a revocar la sentencia en este aspecto puesto que el dictamen fue tenido como prueba y a pesar de las objeciones aclaraciones y adiciones planteadas, ellas no prosperaron. La tardanza en la entrega del peritaje no está prevista por la ley para desconocer su reconocimiento y pago, sino como criterio para su fijación.

**29.- Gustavo Moya Angel**, (fls. 6263 y 7056), por medio de apoderado judicial, interpuso recurso de apelación contra

---

<sup>245</sup> **Artículo 36. Criterios para la fijación de honorarios.** El funcionario de conocimiento, en la oportunidad procesal, con criterio objetivo y con arreglo a las tarifas señaladas en el presente Acuerdo, fijará los honorarios de los auxiliares de la justicia, individualizando la cantidad dentro de los límites que se le trazan, basado en la complejidad del proceso, cuantía de la pretensión, si es el caso, duración del cargo, calidad del experticio, requerimientos técnicos, científicos o artísticos propios del cargo y la naturaleza de los bienes y su valor.

Expediente No. 25000-23-27-000-2001-0479-01  
Acumulados Nos. 2000-0428, 2001-0122, 2001-0343  
Actor: GUSTAVO MOYA ÁNGEL Y OTROS  
Acción Popular

la sentencia de 25 de agosto de 2004, notificada por edicto el 1º de septiembre de 2004, escrito radicado el 8 de septiembre de 2004.

Como argumentos de la apelación invocó los siguientes:

1. Se revoque el numeral DECIMO PRIMERO de la parte resolutive de la sentencia, que dispuso fijar como incentivo para cada uno de los actores populares la suma de cincuenta salarios mínimos legales mensuales a cargo de las entidades que da cuenta la parte motiva de la sentencia y en su lugar se ordene el pago del incentivo en los términos previstos en el artículo 1005 del Código Civil, esto es, una suma que no baje de la décima, ni exceda de la tercera parte de lo que cueste la demolición o enmienda, o el resarcimiento del daño, por cuanto la acción popular fue promovida el 1º de octubre de 1992, cuando la norma de carácter sustancial era la del Código Civil y no la de la Ley 472 de 1998 y que el incentivo para el caso en particular corresponde a la Empresa de Energía de Bogotá, EMGESA S.A. y CODENSA S.A. quienes son solidariamente responsables y no a las entidades señaladas en el numeral 6.23.1 de la parte motiva de la sentencia.

La Sala dará aplicación a la jurisprudencia de la Sala Plena que dispuso que no hay lugar a reconocer el incentivo por cuanto éste fue derogado.

2. Se reforme el numeral PRIMERO de la parte resolutive de la sentencia y en su lugar se ordene declarar

Expediente No. 25000-23-27-000-2001-0479-01  
Acumulados Nos. 2000-0428, 2001-0122, 2001-0343  
Actor: GUSTAVO MOYA ÁNGEL Y OTROS  
Acción Popular

solidariamente responsables, por acción u omisión, a la Empresa de Energía de Bogotá, a EMGESA S.A. y a CODENSA S.A., como consecuencia de la escisión de que fue objeto la Empresa de Energía Eléctrica de Bogotá, inicialmente demandada.

En la parte resolutive de la sentencia se determinará quienes deben responder y en qué términos, así como si son responsables por acción u omisión de la contaminación generada en la Cuenca del Río Bogotá y sus afluentes. El hecho de que la Empresa de Energía Eléctrica de Bogotá se haya escindido, con el objeto de separar la generación de energía de la prestación y facturación del servicio, será objeto de análisis en esta sentencia, debiéndose precisar que la Administración del Embalse del Muña corresponde a EMGESA, empresa que fue legal y oportunamente vinculada al proceso.

**30. Sara Mariela Parraga de Moya,** (fls. 6291 y 6584) en calidad de sucesora procesal del demandante Gustavo Moya Angel y por medio de apoderado judicial radicó memorial de apelación el 24 de febrero de 2005.

Fundamentos del recurso:

Manifiesta su inconformidad con la sentencia en que:

- Las causas que originan la contaminación del río Bogotá no dan lugar a eximir de responsabilidad a la Empresa de Energía Eléctrica de Bogotá, destacando que la acción popular se promovió para solucionar la problemática de contaminación del río a la población de Sibaté y municipios aledaños.

Expediente No. 25000-23-27-000-2001-0479-01  
 Acumulados Nos. 2000-0428, 2001-0122, 2001-0343  
 Actor: GUSTAVO MOYA ÁNGEL Y OTROS  
 Acción Popular

- Se revoque el numeral décimo de la sentencia en el sentido que se ordene dar aplicación al incentivo previsto en el inciso segundo del artículo 1005 del Código Civil, porque la acción popular fue promovida el 1º de octubre de 1992, razón por la cual debe aplicarse la norma sustancial y no la procesal de la Ley 472 de 1998 y para que el mismo corra a cargo de la Empresa de Energía de Bogotá, EMGESA S.A. y CODENSA S.A, quienes son solidariamente responsables a raíz de la escisión de la EEEB y no a cargo de las entidades a que se refiere el numeral 6.23.1 de la parte motiva de la sentencia.
- Se reforme el numeral primero de la parte resolutive de la sentencia, que desestimó las excepciones de mérito propuestas por los demandados y declaró solidariamente responsables, por acción y por omisión a la Nación Ministerio de Minas y Energía, Ministerio de Vivienda, Ambiente y Desarrollo Territorial, al IDEAM, al INVIMA, al Ministerio de Agricultura, a la CAR, al Distrito Capital- DAMA- Empresa de Acueducto y Alcantarillado de Bogotá, Empresa de Energía Eléctrica, al departamento de Cundinamarca y a los municipios de la Cuenca Alta, media y baja del río Bogotá. En su lugar solicita se ordene **declarar solidariamente responsables, por acción u omisión, a la Empresa de Energía de Bogotá -EMGESA S.A. y CODENSA S.A.,** respecto de los hechos en que se fundamentó la acción popular instaurada por Gustavo Moya Angel, como consecuencia de los vertimientos y almacenamiento de las aguas negras.

Expediente No. 25000-23-27-000-2001-0479-01  
Acumulados Nos. 2000-0428, 2001-0122, 2001-0343  
Actor: GUSTAVO MOYA ÁNGEL Y OTROS  
Acción Popular

- Presenta una tabla en la cual consigna un "*Resumen de costos aproximados de las propuestas recomendadas*", que asciende a la suma de US\$347.9 millones de dólares, liquidados a 1º de octubre de 2001, a la tasa de \$2.339,40 moneda colombiana, valor que debe ser actualizado a la tasa representativa del mercado vigente. Agrega que como apoderado del actor popular ha realizado una actividad diligente durante más de doce (12) años que lleva el proceso, lo que hace equivocada la apreciación del Tribunal de instancia al advertir que "*(...) no ha sido la diligente actividad del apoderado lo que ha llevado a la toma de decisiones como las que se adoptan en esta sentencia, sino la ingente labor de esta Corporación para buscar un remedio en forma definitiva a la contaminación del río (...)*".

Tanto la responsabilidad de la Empresa de Energía de Bogotá como la de EMGESA, serán establecidas en la parte resolutive de la sentencia y respecto del incentivo se reiteran los argumentos esbozados para efecto de negar su reconocimiento porque fue derogada la norma que lo autorizaba.

**31. Jorge Humberto González Villanueva**, actor en el proceso de la referencia, radicó escrito el 29 de septiembre de 2004 para interponer el recurso de apelación (fl. 6453) y el 24 de febrero de 2005 para sustentarlo (fl. 7031), en los siguientes términos:

Expediente No. 25000-23-27-000-2001-0479-01  
Acumulados Nos. 2000-0428, 2001-0122, 2001-0343  
Actor: GUSTAVO MOYA ÁNGEL Y OTROS  
Acción Popular

- El Tribunal omite la condena en concreto para la recuperación de la represa del Muña y sus afluentes, olvidando que EMGESA S.A. toma las aguas del río Bogotá para verterlas directamente a la represa del Muña a través del Sistema de Bombeo que tiene instalado, sin ningún tipo de tratamiento primario, secundario y mucho menos terciario, origen y causa del grave daño ambiental actual de la represa del Muña.
- Dicha responsabilidad se encuentra debidamente acreditada en el dictamen pericial, que no fue objetado por las partes y que concluye que el responsable del daño ambiental que representa la represa por el vertimiento de las aguas del río, trasvasamiento, en lo cual se fundamenta el Tribunal para exonerar de responsabilidad a la Empresa de Energía Eléctrica de Bogotá.
- Se revoque la sentencia complementaria en el numeral que dispuso la apropiación presupuestal de las accionadas para inversión de las obras a realizar en lugar de ordenar la constitución de la póliza que garantice el cumplimiento de los compromisos adquiridos por los accionados.
- Solicita se denieguen las apelaciones de los demandados por cuanto son solidariamente responsables de la descontaminación del río Bogotá y sus afluentes y se convoque a una audiencia pública previa al fallo.

Sobre los motivos de impugnación aquí planteados cabe reiterar que en relación con la responsabilidad atribuible a EMGESA la Sala proferirá la decisión

Expediente No. 25000-23-27-000-2001-0479-01  
Acumulados Nos. 2000-0428, 2001-0122, 2001-0343  
Actor: GUSTAVO MOYA ÁNGEL Y OTROS  
Acción Popular

considerando estos argumentos, así como la forma en que las entidades deberán efectuar la apropiación presupuestal para realizar las inversiones a que haya lugar para lograr la descontaminación de la Cuenca del Río Bogotá y sus afluentes y la responsabilidad de cada uno de los intervinientes en el proceso, de conformidad con sus competencias.

**32. El Municipio de Tocancipá**, por medio de apoderada judicial sustentó el recurso de apelación en escrito radicado el 25 de febrero de 2005, (fl. 5880) en el cual señala como motivos de inconformidad con la sentencia recurrida y argumentos que los fundamentan:

- El juez de instancia desconoció las propuestas planteadas en el "pacto de cumplimiento", presentado por el municipio el cual demostró total disposición para su cumplimiento; en particular el compromiso de adelantar las obras y proyectos en materia de descontaminación de las fuentes hídricas del municipio, manejo de residuos sólidos y preservación del ambiente con el concurso de la CAR, la Gobernación de Cundinamarca y la Nación en el ámbito de sus competencias. Tampoco comparte la procedencia de la condena en costas.
- No se encuentra probada de forma clara y concreta la supuesta responsabilidad del municipio de Tocancipá en la contaminación del río Bogotá ni en sus afluentes; tampoco en la violación de los derechos colectivos alegados en la demanda.
- El fallo tal como fue concebido, así como la responsabilidad solidaria que se impone con él hace

Expediente No. 25000-23-27-000-2001-0479-01  
Acumulados Nos. 2000-0428, 2001-0122, 2001-0343  
Actor: GUSTAVO MOYA ÁNGEL Y OTROS  
Acción Popular

un estudio genérico y no particular de las condiciones de cada caso concreto, ni de las acciones iniciadas y adelantadas por cada uno de los entes territoriales para declarar, sin fundamento jurídico una responsabilidad. Es más, los verdaderos contaminantes como EMGESA y la Empresa de Energía de Bogotá resultaron librados de cualquier responsabilidad frente a las pretensiones de la demanda, lo que constituye una contradicción palpable en la sentencia, ya que de una parte establece que tales entidades no son responsables ni por acción ni por omisión por la contaminación del río Bogotá y embalse del Muña y posteriormente concluye que deberán asumir los costos de operación y mantenimiento de las obras del Plan de Vida Muña 2000.

- La condena impuesta desconoce la actividad desplegada por el municipio de Tocancipá que ha venido de tiempo atrás ejecutando numerosas acciones tendientes no sólo al tratamiento de la problemática ambiental del río Bogotá en sí misma considerada, sino al cúmulo de aspectos que la misma conlleva como la educación de la comunidad, manejo de residuos, restauración y conservación de predios que por su actividad pueden convertirse en agentes contaminantes, así como la realización de estudios y programación para la ejecución de obras en el mismo sentido.

En estos términos solicita se absuelva a la entidad territorial.

Expediente No. 25000-23-27-000-2001-0479-01  
Acumulados Nos. 2000-0428, 2001-0122, 2001-0343  
Actor: GUSTAVO MOYA ÁNGEL Y OTROS  
Acción Popular

Al respecto la Sala reitera que la responsabilidad establecida en la primera instancia respecto de los municipios de la cuenca obedeció a que como bien lo advierte el impugnante son agentes contaminantes en cuanto vierten aguas residuales de uso doméstico, agrícola e industrial al río Bogotá. El municipio de Tocancipá presenta una problemática adicional relacionada con la minería por explotación de materiales de construcción y las empresas que vierten sus aguas al río sin realizar los procedimientos para tratar las aguas residuales y evitar o al menos disminuir su impacto sobre el río Bogotá. Si bien es cierto el municipio ha venido cumpliendo con los compromisos adquiridos en desarrollo de la primera instancia, habrá que determinar su responsabilidad que por acción u omisión contribuye a la contaminación del río. No resultan de recibo los argumentos planteados por el apelante en el sentido de no ser condenado en costas ni declarado responsable en este proceso.

La actividad de los municipios de la Cuenca tendrá que sujetarse a los precisos lineamientos que se fijen en esta sentencia.

**33. El Municipio de Mosquera**, interpuso el recurso de apelación a folio 5882 y lo sustentó en escrito presentado el 24 de febrero de 2005 (fl.7034) y con fundamento en los siguientes argumentos:

No existe nexo causal entre las pretensiones planteadas y el accionar del municipio de Mosquera frente al daño ambiental causado por el embalse del Muña, no ha existido

Expediente No. 25000-23-27-000-2001-0479-01  
Acumulados Nos. 2000-0428, 2001-0122, 2001-0343  
Actor: GUSTAVO MOYA ÁNGEL Y OTROS  
Acción Popular

desidia administrativa que justifique la vinculación del municipio con el presunto daño ambiental causado al río Bogotá.

Por el contrario, el municipio ha coordinado con la Corporación Autónoma regional (CAR) la prevención mediante lagunas de oxidación o de tratamiento de aguas residuales para no provocar contaminación.

De otra parte, agrega que el deber de protección se ve menguado por la falta de presupuesto, pues son muchas las necesidades que aquejan el municipio para poderlas atender en su totalidad.

Finalmente anota que la falta de control en las zonas de la ronda del río y demás fuentes hídricas afectadas no puede conllevar a descalificar la actividad administrativa ejercida por el municipio de Mosquera.

La Sala reitera frente a estos planteamientos que el daño ambiental generado por el manejo inadecuado de la disposición de aguas residuales a las fuentes hídricas, el desarrollo industrial y agrícola de los municipios de la Cuenca genera responsabilidad para los municipios quienes deberán asumir los costos en los términos que establece la ley y que se dejarán señalados expresamente en esta sentencia para mitigar el impacto que se genera sobre la cuenca del Río Bogotá. No es de recibo afirmar que se están adoptando medidas pero que la falta de recursos impide la ejecución de las actividades necesarias para continuar con la contaminación de la Cuenca Hidrográfica, razón por la cual se establecerán

Expediente No. 25000-23-27-000-2001-0479-01  
Acumulados Nos. 2000-0428, 2001-0122, 2001-0343  
Actor: GUSTAVO MOYA ÁNGEL Y OTROS  
Acción Popular

los criterios de carácter técnico, ambiental y financiero que deberán tener en cuenta los municipios para la recuperación del río Bogotá y sus afluentes en cuanto hace a vertimientos, producción más limpia, planes maestros de acueducto y alcantarillado, planes de ordenamiento territorial, Praes, etc. que son precisamente el objeto de esta sentencia que se originó en la acción popular.

**34. El Municipio de Villapinzón**, por medio de apoderada judicial interpuso recurso de apelación en contra de la sentencia del Tribunal en escrito de 7 de septiembre de 2004, (fl. 5920) con los siguientes argumentos de inconformidad con la sentencia:

- Excluir de la declaración realizada en el artículo primero del fallo recurrido al municipio de Villapinzón.
- Ampliar el plazo, con el objeto de que se corrija o ajuste el término para la ejecución de las obras incluidas en el Pacto de Cumplimiento.
- Revocar en su integridad las obras y decisiones adicionales al pacto de cumplimiento ordenadas en el fallo recurrido de manera arbitraria e ilegal, así:

"Propiciar y controlar los procesos de producción más limpia de las curtiembres de Villapinzón, con cargo a los recursos del municipio, y/o con la coordinación y cofinanciación del Departamento de Cundinamarca, la Beneficencia de Cundinamarca, de la Corporación Autónoma Regional de Cundinamarca, quien tendrá bajo su responsabilidad la dirección y el cumplimiento de esta orden, la que también con cargo a su presupuesto gestionará los programas de producción más limpia bajo -si es del caso- el sistema de COOPERACION DEL

Expediente No. 25000-23-27-000-2001-0479-01  
Acumulados Nos. 2000-0428, 2001-0122, 2001-0343  
Actor: GUSTAVO MOYA ÁNGEL Y OTROS  
Acción Popular

GREMIO DE LAS CURTIEMBRES, según las directrices trazadas en la parte motiva de esta sentencia".

En criterio del apelante esta redacción resulta confusa y dispersa, involucra diversas entidades de manera conjunta y no distingue las obligaciones de cada una, con desconocimiento de las funciones que la ley 99 de 1993 asignó a los municipios y a la CAR en esta materia.

- En cuanto a la orden de procurar para aquellos que se encuentren con necesidades básicas insatisfechas en atención a la precariedad de sus patrimonios ubicados dentro de la zona de la ronda del Río Bogotá, para subsidiar planes de vivienda en un término que no podrá superar un año, contado a partir de la notificación del fallo y a quienes de acuerdo con su declaración de renta estén en capacidad de costear sus propias viviendas deberán ser desalojados de la zona de la ronda en un término máximo de seis (6) meses, el municipio manifiesta su total inconformidad y solicita sean revocadas con fundamento en:

La naturaleza de la actividad; las curtiembres son una actividad industrial con altos índices de rendimiento, el municipio no recibe ingresos tributarios por este concepto, luego resulta inexplicable la orden de la magistrada en el sentido de financiar con recursos propios o a través de otras entidades estatales, un subsidio de vivienda a un gremio que tiene intereses particulares. El municipio no cuenta con los recursos para acatar esta orden.

Expediente No. 25000-23-27-000-2001-0479-01  
Acumulados Nos. 2000-0428, 2001-0122, 2001-0343  
Actor: GUSTAVO MOYA ÁNGEL Y OTROS  
Acción Popular

Los curtidores son los verdaderos agentes contaminantes, realizan una actividad que afecta el ambiente y en vez de ordenar el Tribunal a los curtidores el cumplimiento real y efectivo de las normas de vertimiento pretende premiarlos con subsidios de vivienda a cargo del municipio.

De acuerdo con el artículo 9° de la Ley 472 de 1998, las acciones populares proceden contra toda actuación u omisión de las autoridades públicas o de los particulares que violen o amenacen violar los derechos colectivos y la actividad del juez se concreta en una orden para evitar el daño contingente, hacer cesar el peligro, amenaza, vulneración o agravio de dichos derechos no para disponer subsidios de vivienda, con desconocimiento de los requisitos y presupuestos legales para su otorgamiento, en los términos de la Ley 388 de 1997 y la Ley 136 de 1994, presupuestos que en el presente caso no se cumplen.

Corresponde a la CAR adelantar el procedimiento sancionatorio previsto en el artículo 85 de la Ley 99 de 1993 en concordancia con el Decreto 1594 de 1984 y a los municipios, la ejecución de las respectivas sanciones, luego la eficacia de la actuación administrativa corresponde a la CAR.

- Revocar el artículo décimo primero que fija el incentivo en lo que tiene que ver con el municipio, porque la entidad municipal no cuenta con los

Expediente No. 25000-23-27-000-2001-0479-01  
Acumulados Nos. 2000-0428, 2001-0122, 2001-0343  
Actor: GUSTAVO MOYA ÁNGEL Y OTROS  
Acción Popular

recursos; en caso de no acceder a esta solicitud, se adecue de manera proporcional y razonable, acorde con las posibilidades presupuestales y las responsabilidades de cada entidad.

Sobre la responsabilidad, el plazo de ejecución de las obras, así como sobre las decisiones adoptadas en primera instancia relacionadas con el subsidio de vivienda y el incentivo, se dispondrá de manera integral en esta sentencia, atendiendo las particularidades de cada una de las entidades territoriales y sus competencias en la materia.

**35. El Municipio de Cajicá,** interpuso y sustentó el recurso en escrito radicado el 24 de febrero de 2005, (fl. 5936 y 6471) por medio de apoderado judicial, que declaró solidariamente responsables de la catástrofe ecológica del río Bogotá, entre otros al municipio de Cajicá por acción, como municipio de la Cuenca Alta del río Bogotá.

**Manifiesta su inconformidad con el fallo en los siguientes términos:**

- El concepto de solidaridad ofrece dificultad frente a un asunto que involucra múltiples actores, más aún cuando la entidad territorial ha cumplido con los compromisos definidos en los acuerdos pactados en la oportunidad procesal correspondiente. En la actualidad Aguas de Cajicá tiene elaborado un proyecto de planta compacta para ser presentado en

Expediente No. 25000-23-27-000-2001-0479-01  
Acumulados Nos. 2000-0428, 2001-0122, 2001-0343  
Actor: GUSTAVO MOYA ÁNGEL Y OTROS  
Acción Popular

la Gobernación o en otras entidades para buscar recursos para su financiación.

En relación con los compromisos a mediano plazo, esto es la construcción de la planta de tratamiento de los sectores de La Virgen-Rincón Santo- Puerta del Sol- El Misterio, cuyo valor asciende a la suma de \$500.000.000 se ejecutará con cargo al presupuesto de los años 2004 y 2005, lo cual es imposible de cumplir porque no fue previsto en el presupuesto.

Se anexa el plan de mejoramiento de la contraloría Departamental de Cundinamarca, en donde indica que se dio cumplimiento al art. 111 de la ley 99 de 1993, al asignar recursos para la compra de predios de interés ambiental.

En relación con el pacto de cumplimiento, se iniciará la construcción de la planta de tratamiento de los sectores de la Virgen- Rincón Santo- Puerta del Sol- El Misterio, en dicha vigencia; de igual manera la reforestación de la cuenca del río Bogotá.

Sobre la orden de construcción de redes de alcantarillado, el municipio iniciará en la presente vigencia, el levantamiento y los cálculos para las redes de alcantarillado y planta de tratamiento con capacidad para atender a los usuarios de la zona industrial. (Anexa informe).

Expediente No. 25000-23-27-000-2001-0479-01  
Acumulados Nos. 2000-0428, 2001-0122, 2001-0343  
Actor: GUSTAVO MOYA ÁNGEL Y OTROS  
Acción Popular

Solicita que se revoque el fallo, con fundamento en los argumentos aquí expuestos y en la contestación de la demanda, así como en el Pacto de Cumplimiento.

Al respecto la Sala hará los pronunciamientos en la parte final del proveído dentro del marco de la solución integral.

**36. El Municipio de Zipaquirá, por medio de apoderado interpuso y sustentó el recurso de apelación (fl. 6056. 6460 y 7804), con base en los siguientes argumentos:**

- Se revoque el ordinal segundo de la parte resolutive de la sentencia en cuanto el pacto de cumplimiento presuntamente aprobado con relación al municipio de Zipaquirá carece de aprobación por las partes, no fue suscrito por el Alcalde de la localidad, sino por el Gerente de la Empresa de Acueducto, Alcantarillado y Aseo del municipio que es un ente descentralizado con autonomía administrativa. La función del juez es la de aprobar los pactos de cumplimiento, su celebración es atribución de las partes, sin embargo el juez modificó la propuesta sin el consentimiento de las partes, con lo cual se extralimitó en el ejercicio de sus funciones.

La Sala parte del criterio ya establecido según el cual el Pacto de Cumplimiento es uno solo, no puede ser fraccionado ni parcial, luego en primera instancia se realizaron acuerdos con miras a superar el problema de la contaminación del río Bogotá. En estos términos, en la parte conclusiva de esta sentencia se adoptarán las

Expediente No. 25000-23-27-000-2001-0479-01  
Acumulados Nos. 2000-0428, 2001-0122, 2001-0343  
Actor: GUSTAVO MOYA ÁNGEL Y OTROS  
Acción Popular

decisiones relativas a la responsabilidad de cada una de las entidades públicas que tienen injerencia sobre la Cuenca del río Bogotá.

Como en esta oportunidad lo que se dispuso fue una decisión fundada en un proceso y no en el Pacto de Cumplimiento las órdenes impartidas provinieron fue de la sentencia.

- Revocar el ordinal cuarto de la parte resolutive de la sentencia con relación a la construcción e implementación del plan maestro de acueducto y alcantarillado ya que se formuló una propuesta que sobrepasa el año 2009 y el proyecto exigiría un presupuesto con el cual el municipio no cuenta y lo llevaría a tener que renunciar al desarrollo de otros proyectos igualmente prioritarios que desde el punto de vista social resulta totalmente imposible. El Tribunal se abroga competencia para disponer de los recursos del municipio cuando esta función es exclusiva de la entidad administrativa a través de los planes de desarrollo.

La construcción e implementación del Plan Maestro de Acueducto y Alcantarillado de las entidades territoriales en cuanto a plazo y términos se establecerá por la gerencia estratégica de cuenca, de conformidad con los recursos de que dispone el municipio para estos efectos, sin que ello sea óbice para que se alegue la carencia de recursos para desarrollar estas obras.

Expediente No. 25000-23-27-000-2001-0479-01  
Acumulados Nos. 2000-0428, 2001-0122, 2001-0343  
Actor: GUSTAVO MOYA ÁNGEL Y OTROS  
Acción Popular

- En cuanto a la obligación de construir la planta de tratamiento para las aguas residuales en un término que no sobrepase el 2009, de acuerdo con el pacto de cumplimiento dichas plantas podrán ser utilizadas en un 100% aproximadamente en los años 2012-2015 y siempre y cuando el municipio sea eximido del pago que se le impone para asumir la operación y mantenimiento del interceptor Canoas-Alicachín, despojándolo de las transferencias que vienen de EMGESA, hecho que hace más difícil la situación para el municipio. La sentencia no ha dado un tratamiento proporcional en materia de obligaciones a los municipios al no tener en cuenta la diferencia existente en materia de disposición de recursos, más aún cuando Zipaquirá cuenta con uno de los presupuestos más bajos de la región.

La Sala estima que la solución de la problemática de la Cuenca del río Bogotá obedece a un criterio de solución integral que se definirá en esta sentencia, así que los recursos para la solución integral se distribuirán de manera equitativa y racional entre todos aquellos que impactan directa o indirectamente la cuenca del río Bogotá.

- Se violaron las normas procesales establecidas en la ley 472 de 1998. El fallador en primera instancia terminó el proceso con una sentencia que involucra parte de lo dispuesto en el artículo 27, pacto de cumplimiento y parte de lo contenido en el artículo 34, sentencia. Igualmente introdujo modificaciones

Expediente No. 25000-23-27-000-2001-0479-01  
Acumulados Nos. 2000-0428, 2001-0122, 2001-0343  
Actor: GUSTAVO MOYA ÁNGEL Y OTROS  
Acción Popular

al proyecto de pacto de cumplimiento, las cuales no fueron aprobadas por las partes.

La Sala con fundamento en el análisis ya efectuado señaló que por la naturaleza jurídica del Pacto de Cumplimiento los acuerdos realizados por las entidades en el Tribunal de instancia no tienen el carácter de tal, sino de meros compromisos para tratar de superar y disminuir el daño pero no para resolver de manera integral el problema; solución que se planteará en esta sentencia.

**37. El municipio de Sibaté,** por medio de apoderado judicial presentó recurso de apelación en escrito radicado el 8 de septiembre de 2004 (fl. 6061), y como argumentos de disconformidad con la sentencia señaló los siguientes:

- Violación de normas constitucionales y legales contenidas en los artículos 366, 287 numeral 3°, 313 numerales 1°, 2°, 4° y 7°, 317, 339, 356, 366 en conexidad con los artículos 1, 2, 11, 49, 79 y 80 de la C.P.
- Valoración errada de los hechos y de las pruebas. La sala da por demostrado que el embalse del Muña es parte del río Bogotá, con lo cual desconoce que el río Bogotá es una formación de la naturaleza y el embalse es una obra construida por el hombre con una finalidad específica, generar energía, de manera que el río Bogotá no pasa por el municipio de Sibaté y por el contrario es la actividad empresarial de carácter comercial e industrial de la EEEB y EMGESA la que hace desviar las aguas del río para trasvasarlas al embalse del Muña, proceso

Expediente No. 25000-23-27-000-2001-0479-01  
Acumulados Nos. 2000-0428, 2001-0122, 2001-0343  
Actor: GUSTAVO MOYA ÁNGEL Y OTROS  
Acción Popular

que hoy sufre el municipio por la contaminación ambiental, afectando los derechos fundamentales a la vida y a la salud de la población, como consecuencia del bombeo de las contaminadas aguas del río Bogotá al embalse del Muña.

La problemática del Embalse del Muña está vinculada con la problemática del río Bogotá, lo que significa que hace parte de la solución integral, sin que ello sea óbice para señalar que corresponde a EMGESA su administración. Será en esta sentencia que se establezca la responsabilidad frente al manejo del mismo.

- Advierte que de conformidad con el dictamen pericial realizado por la CAR, dentro de la acción de tutela, en donde se conceptuó que las aguas que bombeaba la EEEB, del río de Bogotá al Embalse del Muña, estaban clasificadas como grado C, altamente contaminantes, restrictivas para uso humano, animal o vegetal y sin embargo no se ordenó la suspensión del bombeo de las aguas del río Bogotá al embalse del Muña, con el argumento que ello daría lugar a un "apagón" en varios municipios de Cundinamarca.

Sobre el impacto ambiental del Embalse del Muña y su administración por EMGESA se dispondrá en capítulo aparte pues hará parte de la solución integral que se adopte en la sentencia para la cuenca del río Bogotá.

- Se objeta el pacto de cumplimiento presentado por EMGESA, LA EEEB, y la EAAB, en relación con el embalse del Muña, porque el Tribunal tuvo en cuenta

Expediente No. 25000-23-27-000-2001-0479-01  
Acumulados Nos. 2000-0428, 2001-0122, 2001-0343  
Actor: GUSTAVO MOYA ÁNGEL Y OTROS  
Acción Popular

el estudio realizado por la Universidad de los Andes que realizó su análisis a partir de dos premisas erradas. La primera al considerar el embalse del Muña como parte del sistema de tratamiento del río Bogotá, siendo falso porque el bombeo autorizado mediante la Resolución 0603 de 1997, tiene como clara y única finalidad la de generar energía y no la de tratar agua contaminada y al autorizar la realización en el área del embalse del Muña una planta de tratamiento, es una decisión que compete adoptar exclusivamente al municipio de Sibaté, pues por disposición constitucional (art. 313, num. 7 C.P.) corresponde al Concejo Municipal de Sibaté reglamentar el uso del suelo en su jurisdicción y la segunda premisa errada es la de considerar ilimitada la capacidad de almacenamiento del embalse del Muña.

Será objeto de análisis en la solución integral que se plantea en acápite posterior de esta sentencia.

- Advierte que las medidas de mitigación ordenadas por el juez de tutela desde 1993 y las ordenadas por la CAR mediante la Resolución 1849 de 1999, conocida como Plan de Vida Muña 2000, no han disminuido el impacto ambiental generado por el bombeo del agua del río al embalse del Muña.

Asiste razón al impugnante en cuanto las medidas adoptadas no han resultado suficientes para mitigar el impacto ni para solucionar el problema de la contaminación ambiental en el municipio de Sibaté, habrá que analizar las acciones emprendidas por EMGESA y si

Expediente No. 25000-23-27-000-2001-0479-01  
Acumulados Nos. 2000-0428, 2001-0122, 2001-0343  
Actor: GUSTAVO MOYA ÁNGEL Y OTROS  
Acción Popular

ellas han resultado suficientes. En los alegatos de conclusión EMGESA relaciona las actividades que incluyen desecación de las colas del embalse del Muña (140hs. De terreno desecadas); construcción de diques que permitió el aislamiento del embalse con respecto al municipio; remoción total del buchón del embalse (570.000 toneladas recuperación espejo de agua con mejoramiento del paisaje); control del nivel de zancudos (disminución del 99.96%) seguimiento y monitoreo de la calidad de agua (recuperación de oxígeno disuelto en el embalse), con ello afirma ha cumplido con las obligaciones asumidas en el denominado Pacto de Cumplimiento y estima que por lo tanto no hay razón para que ahora se le impongan cargas por la contaminación del río, cuando no contamina el afluente.

Sin embargo, el municipio no cuenta con una planta de tratamiento de aguas residuales, a pesar de la obligación impuesta por la resolución de la CAR del año 2.005, en cuanto a su diseño, construcción y puesta en marcha a cargo de Emgesa, la EEB y la EAAB. (Contraloría General de la República, 2010, Auditoría Especial a la Gestión del Río Bogotá).

- Las leyes 142 de 1993 y 715 de 2001, señalan que es responsabilidad de los municipios la prestación de los servicios públicos de acueducto y alcantarillado, de tal manera que no se puede imponer al municipio la responsabilidad de tratar en su jurisdicción las aguas del río Bogotá que recibe las aguas servidas de Bogotá y otros

Expediente No. 25000-23-27-000-2001-0479-01  
Acumulados Nos. 2000-0428, 2001-0122, 2001-0343  
Actor: GUSTAVO MOYA ÁNGEL Y OTROS  
Acción Popular

municipios, cuando esta es obligación de la Administración Distrital la cual viene eludiendo.

En estos términos solicita:

- Modificar la obligación que se impone en primera instancia de condenar al municipio de Sibaté al pago de la construcción de la Planta de Tratamiento de Canoas, ya que el municipio está lejos de contaminar el río y por el contrario recibe los desperdicios convirtiéndose en víctima de la contaminación ambiental por el bombeo realizado por EMGESA.

Sobre la responsabilidad del municipio y los aportes a la solución integral se definirán en esta sentencia sin que sea de recibo aceptar que el municipio no contamina puesto que al no contar con una planta adecuada de tratamiento de sus aguas residuales ellas se vierten sin tratamiento alguno al río Bogotá y consecuentemente al embalse.

- No ser condenado de manera solidaria como lo dispuso la decisión de instancia, porque según la posición geográfica del municipio se debe considerar como perjudicado directo de la contaminación ambiental por parte de la EEEB, EMGESA y el Distrito Capital. Igualmente señala que se está creando una obligación de carácter económico que no le corresponde asumir al municipio, para la financiación de una obra de la cual no es directamente responsable, desconociendo la autonomía con la que cuenta el municipio para la

Expediente No. 25000-23-27-000-2001-0479-01  
Acumulados Nos. 2000-0428, 2001-0122, 2001-0343  
Actor: GUSTAVO MOYA ÁNGEL Y OTROS  
Acción Popular

inversión de los recursos, contrariando el artículo 317 de la Constitución Política.

También se hará un pronunciamiento sobre la responsabilidad solidaria que se estableció en el fallo de primera instancia.

Igualmente, partiendo del hecho de que el presupuesto está elaborado por cada municipio de acuerdo con sus particularidades, ello será tenido en cuenta al proferir esta sentencia.

- Revocar el numeral 5º literal d) de la sentencia, en especial por la condena impuesta al municipio de destinar un porcentaje mayor para la operación y mantenimiento de la PTAR Canoas, la cual se ubica fuera de la jurisdicción del municipio de Sibaté, con cargo a los recursos del municipio y que se declare que éste no ha incurrido ni por acción ni por omisión en la contaminación del río Bogotá y sus afluentes.

El numeral quinto literal d) de la sentencia dispuso:

**QUINTO:** Así mismo, las obras de que trata el literal e) del ordinal anterior, se construirán en el siguiente término y con cargo a las siguientes entidades y recursos: (...) **d)** De igual manera, para efectos de la operación y el mantenimiento de la PTAR CANOAS se hará con cargo a los recursos por Ley 715 del Distrito Capital que perciba después del año 2009, y con las transferencias del sector eléctrico a la CAR y a los municipios, especialmente Sibaté que recibe un porcentaje mayor que los demás, de la siguiente manera: El Distrito Capital aportará el 50% del 41% del Propósito General, la suma que reste del

Expediente No. 25000-23-27-000-2001-0479-01  
Acumulados Nos. 2000-0428, 2001-0122, 2001-0343  
Actor: GUSTAVO MOYA ÁNGEL Y OTROS  
Acción Popular

*precio de la operación descontado dicho porcentaje será cubierta por partes iguales por la CAR, el MUNICIPIO DE SIBATÉ y por los municipios que reciben las transferencias, considerados estos últimos como una sola parte para efectos de dividir en tres partes el saldo;*

Al respecto la Sala considera que sólo con la participación efectiva de todos los municipios de la cuenca y los recursos provenientes de la Nación, la CAR y el Departamento será posible asumir el reto de la descontaminación del río Bogotá y sus afluentes; la participación habrá de fijarse en la parte resolutive de la sentencia, pero no es posible excluir a ningún municipio de la Cuenca como lo pretende el municipio de Sibaté.

**38. El Municipio de Funza**, mediante apoderado judicial radicó escrito (fls. 6211 y 6458) con el objeto de interponer recurso de apelación por las siguientes razones:

- En primer término advierte que el municipio de Funza no es causante de la contaminación de que es objeto la vertiente fluvial conocida con el nombre de río Bogotá, pero si es víctima de su afectación e impacto ambiental, por ello en la sentencia de primera instancia expresamente se dejó plasmado que la CAR responsabilizó de manera categórica al Distrito y a la EAAB sobre la contaminación del río Bogotá, razón por la cual se les debería adjudicar la mayor carga para la recuperación del río Bogotá y no al municipio que no tiene nada que ver con la carga contaminante.

Expediente No. 25000-23-27-000-2001-0479-01  
Acumulados Nos. 2000-0428, 2001-0122, 2001-0343  
Actor: GUSTAVO MOYA ÁNGEL Y OTROS  
Acción Popular

Se reitera por la Sala que no es viable desvincular del compromiso con la descontaminación del Río Bogotá a los municipios de la Cuenca pues al no contar con la planta de tratamiento de las aguas residuales, de origen doméstico e industrial, todos sin excepción alguna se consideran como agentes contaminantes.

- En estos términos, propone se declare la inexistencia de la obligación a cargo del municipio.

No hay lugar, en criterio de la Sala, a declarar la inexistencia de la obligación a cargo del municipio pues está demostrado en el proceso que todos los municipios de la cuenca contaminan con el vertimiento de sus aguas residuales sin que hayan adoptado los correctivos necesarios para lograr disminuir el impacto sobre el río Bogotá por carga contaminante a sus aguas.

- A pesar de que el pacto de cumplimiento fue aprobado por el Tribunal según consta a folio 314 de la sentencia lo fue a corto plazo "cinco años" tiempo imposible de cumplir por las cargas presupuestales que se encuentran alejadas de la realidad económica del municipio.

En estos términos solicita:

Revocar la sentencia de 25 de agosto de 2004, en lo relativo a las condenas impuestas al municipio, ya que nunca ha realizado conducta por omisión relacionadas con la contaminación del río Bogotá y el embalse del Muña.

Expediente No. 25000-23-27-000-2001-0479-01  
Acumulados Nos. 2000-0428, 2001-0122, 2001-0343  
Actor: GUSTAVO MOYA ÁNGEL Y OTROS  
Acción Popular

Sobre el particular cabe reiterar igualmente que no será exonerado por las obligaciones impuestas en la sentencia de primera instancia, ninguno de los municipios de la cuenca, los cuales tendrán que contribuir con sus presupuestos en la solución integral para la descontaminación de la cuenca del río Bogotá.

**39. El municipio de Gachancipá,** por medio de apoderada judicial mediante escrito radicado el 24 de febrero de 2005 sustentó el recurso de apelación (fl. 7175), con fundamento en las siguientes consideraciones:

- Extralimitación del juez en la sentencia objeto de impugnación, por violación de los artículos 27 y 34 de la Ley 472 de 1998, que disponen la forma como puede terminar la acción popular: Pacto de Cumplimiento integral o Sentencia de fondo que decida sobre todas las pretensiones, sin embargo el Tribunal optó por combinar soluciones, fundadas en supuestos pactos de cumplimiento parciales al no incluir todos los aspectos de la litis ni involucrar a todas las partes; igual ocurre con la sentencia que tampoco se refiere a todas las pretensiones ni a todos los derechos violados.

Sobre el particular ya se realizaron las consideraciones según las cuales no hay lugar a considerar la posibilidad de dar por terminado el proceso respecto de pactos parciales o acuerdos logrados inter-partes pues de conformidad con la Ley 472, artículo 27 la aprobación del pacto de cumplimiento se surte mediante sentencia pero siempre y cuando hayan comparecido la totalidad de las

Expediente No. 25000-23-27-000-2001-0479-01  
Acumulados Nos. 2000-0428, 2001-0122, 2001-0343  
Actor: GUSTAVO MOYA ÁNGEL Y OTROS  
Acción Popular

partes interesadas, se formule entre ellas el pacto de cumplimiento y se acepten por ellas las correcciones que el juez proponga. En el presente caso no se dieron estos supuestos y si bien el Tribunal de instancia no declaró expresamente fallida la audiencia de pacto de cumplimiento expidió el auto ordenando continuar con el proceso y abrió a pruebas el mismo, lo que significa que en el presente proceso no existió terminación del proceso por virtud de sentencia que hubiese aprobado un Pacto de Cumplimiento, luego en este sentido se modificará la sentencia objeto de la alzada.

- El Pacto de Cumplimiento aprobado con el municipio de Gachancipá no fue aprobado por la Magistrada ni por las partes, tal como consta en el Acta de fecha 6 de octubre de 2003, por el contrario, fue rechazado expresamente por la Magistrada Ponente quien ordenó al municipio pronunciarse sobre el tema de control y vigilancia de la actividad industrial en la zona, particularmente sobre la explotación de canteras, luego la aprobación hecha en la sentencia es ilegal.

Resulta importante aclarar que sobre los supuestos anteriormente planteados, lo que hizo el Tribunal de instancia fue impartir las órdenes correspondientes y en el evento en que no consintió en las propuestas formuladas por las partes involucradas en el proceso, que como en el presente caso consistió en solicitar un pronunciamiento del municipio sobre el tema de control y vigilancia de la explotación de las canteras en la zona, sin que ello en modo alguno pueda considerarse como ilegal.

Expediente No. 25000-23-27-000-2001-0479-01  
Acumulados Nos. 2000-0428, 2001-0122, 2001-0343  
Actor: GUSTAVO MOYA ÁNGEL Y OTROS  
Acción Popular

- Gachancipá nunca participó ni acordó consensualmente que iba a construir su plan maestro de acueducto y alcantarillado y las demás obras que menciona la parte resolutive de la sentencia.

No hay duda que uno de los requerimientos para la solución integral para la Cuenca del Río Bogotá es la construcción de los Planes maestros de Acueducto y Alcantarillado y demás obras de infraestructura puesto que sólo en la medida en que cada entidad territorial asuma sus obligaciones frente a la disminución o transformación de la carga contaminante se podrá lograr la meta pretendida que va a generar impacto sobre todos los individuos que se benefician o explotan las aguas del río y sus afluentes.

- En cuanto al cambio o complementación del Plan Maestro de Acueducto y Alcantarillado que según la magistrada aprobó el municipio, aclara que no podía comprometerse a su ejecución por deficiencias presupuestales, lo que implicaría desconocimiento de la Ley 715 de 2001, el juez no puede sustituir a las partes o imponer soluciones en contra de su voluntad o cuyo contenido ellas desconozcan.

Los recursos que han sido destinados por ley a los municipios provenientes del Sistema General de Participaciones y de las regalías necesariamente tienen que ser destinados a la construcción de las obras de infraestructura del municipio.

Expediente No. 25000-23-27-000-2001-0479-01  
Acumulados Nos. 2000-0428, 2001-0122, 2001-0343  
Actor: GUSTAVO MOYA ÁNGEL Y OTROS  
Acción Popular

- Violación al principio de legalidad previsto en el artículo 230 de la Constitución Política. El incumplimiento del plan de desarrollo por parte del alcalde puede llevar a una revocatoria del mandato, y una sentencia judicial no puede desconocerla pues se estaría ordenando a la administración ejecutar acciones contrarias a la ley. Las condenas efectuadas por medio de las sentencias deben tener en cuenta la realidad presupuestal de cada entidad, y debe prever que existen rubros presupuestales con destinación específica que no pueden ser objeto de libre disposición por parte de la administración. Agrega que el alcance de la orden judicial dada en la sentencia debe estar limitada por el alcance y contenido de las funciones que legalmente corresponden a las entidades a las cuales se dirige la orden. El tema de los planes de desarrollo no puede ser contravenido por una sentencia judicial, así lo disponen los artículos 315 numeral 5° y 339 inciso segundo de la Constitución Política, la Ley 152 de 1994 y el Decreto 879 de 1998 y lo ha precisado la Corte Constitucional en sentencias C-152 de 1995 y C-538 del mismo año.

Las disposiciones señaladas se refieren a la autoridad competente para presentar el Proyecto de Acuerdo sobre Planes y Programas de Desarrollo y el presupuesto anual de rentas y gastos, por su parte la Ley 152 de 1994, Ley Orgánica del Plan de Desarrollo, tiene como propósito establecer los procedimientos y mecanismos para la elaboración, aprobación, ejecución, seguimiento, evaluación y control de los planes de desarrollo, así

Expediente No. 25000-23-27-000-2001-0479-01  
Acumulados Nos. 2000-0428, 2001-0122, 2001-0343  
Actor: GUSTAVO MOYA ÁNGEL Y OTROS  
Acción Popular

como la regulación de los demás aspectos contemplados por el artículo 342, y en general por el capítulo 2o. del título XII de la Constitución Política y demás normas constitucionales que se refieren al plan de desarrollo y la planificación.

El Decreto 879 de 1998, expedido por el Gobierno Nacional, reglamenta las disposiciones referentes al ordenamiento del territorio municipal y distrital y a los planes de ordenamiento territorial, a las cuales se ordena formular y adoptar su plan de ordenamiento territorial a más tardar el día 24 de enero de 1999, en los términos del artículo 23 de la Ley 388 de 1997.

De esta normativa no se desprende que el Tribunal haya desconocido las disposiciones relativas a los Planes de Desarrollo, pues es precisamente con base en ellos que deben adoptarse las medidas exigidas para lograr las adecuaciones hidráulicas y de infraestructura de los municipios, requeridas para disminuir los impactos contaminantes derivados de los vertimientos de aguas residuales.

- Falta de pruebas y fundamento jurídico de la sentencia para imponer una condena al municipio de Gachancipá puesto que no se le comprobó una acción u omisión que implique la vulneración de los derechos protegidos, por lo contrario todas sus actuaciones se han ajustado a las normas que regulan su campo de acción, a los planes de desarrollo y a su capacidad presupuestal. La sentencia en la parte resolutive se limita a condenar al municipio por omisión en el

Expediente No. 25000-23-27-000-2001-0479-01  
Acumulados Nos. 2000-0428, 2001-0122, 2001-0343  
Actor: GUSTAVO MOYA ÁNGEL Y OTROS  
Acción Popular

control de los vertimientos de las aguas residuales, lo cual no se encuentra acreditado en la parte motiva del fallo.

Son numerosos los estudios y es un hecho evidente que la contaminación del río Bogotá obedece a los vertimientos de aguas residuales sin el tratamiento adecuado para su reutilización; el recurso hídrico ha de manejarse con criterio integral para el desarrollo sustentable, con un señalamiento de líneas de base sólidas que permitan una gestión adecuada y coordinada para su efectiva ejecución, operación y mantenimiento. Pretender que no existe responsabilidad por parte de las autoridades municipales porque no vierten sus aguas directamente al río no resulta razonable frente a una problemática que de no solucionarse de manera integral llevará a que las futuras generaciones carezcan del recurso para su subsistencia, pues todas las actividades humanas dependen del recurso hídrico.

- Inequidad de la condena, no se tuvo en cuenta la real dimensión del municipio y el verdadero índice de influencia que puede llegar a tener en cuanto a la contaminación del río, Gachancipá no es un municipio con gran capacidad para contaminar debido a que su territorio es pequeño, no tiene industrias grandes, tiene pocos habitantes y cuenta con una planta de tratamiento moderna, sin embargo se le condenó en igual proporción a entidades territoriales que cuentan con gran capacidad de contaminación, con más habitantes y presupuesto muy superior.

Expediente No. 25000-23-27-000-2001-0479-01  
Acumulados Nos. 2000-0428, 2001-0122, 2001-0343  
Actor: GUSTAVO MOYA ÁNGEL Y OTROS  
Acción Popular

El grado de responsabilidad será objeto de análisis en la presente sentencia pues no cabe duda que la participación de las entidades territoriales deberá establecerse acorde con su capacidad de pago y proporcional a la relación costo - beneficio.

En estos términos no procede acceder a su solicitud de revocar la sentencia de 25 de agosto de 2004, así como de la sentencia complementaria de 16 de septiembre del mismo año, tampoco de la pretensión subsidiaria, en cuanto no es viable acceder a la solicitud presupuestal y en consecuencia no hay lugar a revocar los numerales 3º, 4º y 5º literal d) de la parte resolutive de la sentencia.

**40. El municipio de Cota**, por medio de apoderada judicial en escrito radicado el 24 de febrero de 2005 sustentó el recurso de apelación interpuesto en contra de la sentencia de 25 de agosto de 2004 (ver folios 6243, 6470 y 7043), porque no comparte las decisiones en ellas adoptadas por las siguientes razones:

- El Tribunal Administrativo de Cundinamarca, aprobó los pactos de cumplimiento presentados por cada uno de los entes demandados y adicionó la sentencia con propuestas que nunca se mencionaron en el pacto de cumplimiento por parte del municipio de Cota, como la de que a partir del año 2009 las transferencias del sector eléctrico deben destinarse para la cuenca hidrográfica y el área de influencia del río y del embalse, expresamente para la operación de mantenimiento de la Planta de Tratamiento de Aguas

Expediente No. 25000-23-27-000-2001-0479-01  
Acumulados Nos. 2000-0428, 2001-0122, 2001-0343  
Actor: GUSTAVO MOYA ÁNGEL Y OTROS  
Acción Popular

Residuales Canoas, gasto que advierte lo debe asumir EMGESA S.A. ya que es la empresa que deriva sus utilidades de la prestación del servicio de energía eléctrica, adoptada con fundamento en que los municipios no han utilizado en debida forma las transferencias del sector eléctrico.

La asignación de los recursos para la solución técnica integral se establecerá de manera detallada en esta sentencia pues no hay duda que en ella deben incluirse todos los recursos que sean necesarios para lograr el resultado que a su vez sea sostenible. La única forma de lograrlo será con el concurso de todos los entes involucrados a través del establecimiento preciso y adecuado de las fuentes de financiamiento.

Tampoco es cierto que ello implique que la empresa EMGESA deje de transferir a los municipios el porcentaje previsto en la ley para que sea destinado a la operación y mantenimiento de la PETAR Canoas, pues EMGESA deberá cumplir con las obligaciones propias de la concesión y las entidades municipales deberán destinar la partida correspondiente para implementar los programas de protección al medio ambiente y a la defensa de la cuenca hídrica.

De lograrse la adecuación de toda la infraestructura requerida, sólo tendrá el municipio que destinar los recursos para el mantenimiento y operación en cuanto a la infraestructura se requiere así como para la solución técnica integral, sin dejar de lado los proyectos relacionados con educación para evitar la contaminación desde la fuente.

Expediente No. 25000-23-27-000-2001-0479-01  
Acumulados Nos. 2000-0428, 2001-0122, 2001-0343  
Actor: GUSTAVO MOYA ÁNGEL Y OTROS  
Acción Popular

- El segundo punto es la condena en costas a favor de los accionantes que incluye honorarios de abogados, los gastos que se encuentren debidamente probados, los cuales se liquidarán una vez quede en firme la sentencia. Al haberse aprobado un pacto de cumplimiento no hay lugar a la condena en costas pretendida.

En relación con la condena en costas, se reitera que en acciones populares, hay lugar a su reconocimiento respecto de los gastos que se encuentren acreditados en el proceso y en los cuales haya incurrido el actor, luego se reitera la posición y en este sentido se dispondrá en la parte resolutive de la sentencia. No necesariamente tiene que acreditarse que haya existido una conducta reprochable atribuible a la parte vencida.

La sentencia definirá la proporción en la cual deberá pagarse por cada uno de los intervinientes.

**41. El municipio de Chía,** por medio de apoderado judicial, interpuso recurso de apelación contra la sentencia de 25 de agosto de 2004 (folio 6246) con el objeto de que se modifiquen los numerales primero, segundo, tercero, cuarto, quinto, décimo y décimo primero, por las siguientes razones:

- Imponer a la Corporación Autónoma Regional de Cundinamarca -CAR, mayores cargas económicas pues ella recibe por concepto de Porcentaje Ambiental de los Gravámenes a la propiedad privada previsto en el artículo 44 de la Ley 99 de 1993 y la Ley 44 de

Expediente No. 25000-23-27-000-2001-0479-01  
Acumulados Nos. 2000-0428, 2001-0122, 2001-0343  
Actor: GUSTAVO MOYA ÁNGEL Y OTROS  
Acción Popular

1990 que desarrolla el inciso segundo del artículo 317 de la Constitución Política y con destino a la protección del medio ambiente y los recursos naturales renovables y no se le imponga al municipio la obligación de incluir en su presupuesto obligaciones que no le corresponden.

- Precisar en la parte resolutive de la sentencia que para el ordenamiento territorial del Río Bogotá, tanto la CAR, como los municipios accionados y las demás entidades supramunicipales son igualmente responsables y, por lo tanto, deben participar de manera activa y directa en tanto, el municipio carece de la información, manejo y demás elementos exigidos para la obligación impuesta.
- No se vincularon al proceso las personas naturales y jurídicas que efectúan vertimientos contaminantes industriales y no industriales.
- La cofinanciación establecida en el fallo resulta difusa en cuanto no determina el grado de responsabilidad de cada entidad accionada que en últimas resultará impuesta por la entidad de mayor jerarquía, sin que sea posible prorratearse porque no todas las entidades involucradas tienen un mismo grado de responsabilidad.
- La recuperación ambiental, incluyendo viviendas involucra sumas millonarias que el ente territorial no alcanzaría a sufragar sino a muy largo plazo.
- No corresponde al fallo señalar en detrimento de los municipios, una menor distribución de los recursos del Fondo Nacional de Regalías.
- El término fijado para la reparación de las redes pluviales de las redes de alcantarillado es muy

Expediente No. 25000-23-27-000-2001-0479-01  
Acumulados Nos. 2000-0428, 2001-0122, 2001-0343  
Actor: GUSTAVO MOYA ÁNGEL Y OTROS  
Acción Popular

breve pues como mínimo se requiere de doce (12) años. Igualmente precisa que le corresponde a la firma HYDROS CHIA S. en C., A. responder por dicha obligación, y en modo alguno al municipio, circunstancia que fue precisada en el proceso. El mismo tratamiento se solicita para la construcción de las PLANTAS DE TRATAMIENTO, pues el término otorgado resulta insuficiente y se requiere ser prorrogado hasta el 2015, pues se trata de un megaproyecto.

Frente a estos requerimientos relacionados con la solución integral que incluye como ya lo hemos señalado no sólo factores técnicos, financieros y de presupuesto, así como la responsabilidad que debe atribuirse, se hará el pronunciamiento en esta sentencia. Como parte de la solución integral.

42. El municipio de Soacha, representado por apoderado judicial, interpuso recurso de apelación y solicitó se modifique el pacto de cumplimiento propuesto, en escrito radicado el 4 de septiembre de 2004, (folio 6254) en los siguientes términos:

- El *a-quo* impone al municipio de Soacha obligaciones que van más allá de la capacidad de inversión del municipio, debido a limitaciones presupuestales, obligaciones que no fueron concertadas ni controvertidas con el municipio. Si bien es cierto el municipio presentó un proyecto de Pacto de cumplimiento que fue aprobado hasta allí llega la responsabilidad del municipio. El Tribunal no podía

Expediente No. 25000-23-27-000-2001-0479-01  
Acumulados Nos. 2000-0428, 2001-0122, 2001-0343  
Actor: GUSTAVO MOYA ÁNGEL Y OTROS  
Acción Popular

aprobar el pacto e imponer obligaciones adicionales, al crear obligaciones por fuera de la capacidad financiera del municipio y obligando a efectuar inversiones como la construcción de la PTAR Canoas que de suyo corresponde a la Empresa de Acueducto y Alcantarillado de Bogotá y a la Corporación Autónoma Regional de Cundinamarca y sin su conocimiento, porque desnaturalizaría la figura del Pacto de Cumplimiento. En estos términos considera que el *a quo* excedió su competencia.

- En estos términos solicita se declare que el municipio sólo es responsable de las obligaciones propuestas y aprobadas en el Pacto de Cumplimiento y que cualquiera otra obligación por fuera del mismo no tiene efectos jurídicos en cuanto no fueron controvertidas por el municipio y por lo tanto, están incursas en causal de nulidad por violación al debido proceso.
- Revocar la sentencia de 25 de agosto de 2004, respecto de:
- Las obligaciones adicionales e inconsultas y dejar vigente las obligaciones contenidas en el pacto, ya que el municipio presentó un pacto de cumplimiento el cual fue aprobado en la sentencia de primera instancia, teniendo en cuenta la solicitud de modificación de las fechas de cumplimiento.
- El incentivo fijado a los actores, en cuanto no se ajusta al equilibrio económico y la equidad, en su defecto se rebaje a un valor acorde con la equidad.

Expediente No. 25000-23-27-000-2001-0479-01  
Acumulados Nos. 2000-0428, 2001-0122, 2001-0343  
Actor: GUSTAVO MOYA ÁNGEL Y OTROS  
Acción Popular

- Se solicita modificar el pacto de cumplimiento, respecto de los años en los cuales se efectuaran los desembolsos ya que a la presentación de la petición, el pacto aún no se había aprobado y porque la EAAB, no había iniciado la correspondiente licitación y para el municipio resulta imposible ejecutar las obras para el 2004 por un valor de 972 millones de pesos. Propone efectuar los desembolsos por la suma de \$972.000.000 en los años 2005, 2006 y 2007.

En atención a estos requerimientos se adoptarán las medidas correspondientes como se ha señalado para efecto de determinar la participación de cada una de las entidades públicas en la construcción de la solución integral para la cuenca del río Bogotá la cual incluye la distribución de los recursos y las responsabilidades correspondientes acorde con el presupuesto y las competencias.

**43. El municipio de Madrid,** por medio de apoderado judicial en representación del municipio y de la Empresa de Acueducto, Alcantarillado y Aseo de Madrid, (folio 6257) interpuso recurso de apelación en escrito radicado el 8 de septiembre de 2004, reiterando en primer lugar los alegatos de conclusión presentados en la instancia y con fundamento en las siguientes consideraciones:

- El municipio de Madrid no es ribereño del río Bogotá por tal razón no se le debió notificar de la acción popular 01-479 ya que la notificación iba dirigida a los representantes legales de los municipios circundantes al río Bogotá y el municipio de Madrid

Expediente No. 25000-23-27-000-2001-0479-01  
Acumulados Nos. 2000-0428, 2001-0122, 2001-0343  
Actor: GUSTAVO MOYA ÁNGEL Y OTROS  
Acción Popular

no hace parte de ellos. Por lo tanto se solicita se excluya de la responsabilidad de la contaminación del río Bogotá al municipio.

- No obstante lo anterior, el río Subachoque como fuente hídrica en un 21% del municipio de Madrid, que desemboca en el río Balsillas y éste a su vez en el río Bogotá, el municipio ha realizado algunas acciones tendientes a la recuperación de la fuente hídrica pero tales esfuerzos resultan inocuos si no se cuenta con el concurso de los otros organismos del orden nacional, departamental y municipal.
- Cuando el río Subachoque pasa por el municipio de Madrid ya viene contaminado, de esta forma los esfuerzos que vienen realizando las diferentes administraciones resultan inútiles.
- Solicita en estos términos que, la descontaminación no solo del río Bogotá sino de todas las fuentes hídricas constituya una prioridad de los planes de desarrollo y sea incluida dentro de los presupuestos de las entidades encargadas del medio ambiente, de todos los órdenes. Agrega que parte de los recursos de los municipios, como el impuesto predial se cede a la CAR, entidad que debe reinvertirlos en programas ambientales dirigidos a la descontaminación de las fuentes hídricas.
- Que se tengan en cuenta las siguientes situaciones que no permiten el cumplimiento de lo fallado:
- Controlar los vertimientos de aguas residuales e implementar programas de producción más limpia para las industrias del municipio, frente a esta obligación le corresponde a la CAR destinar recursos humanos y económicos.

Expediente No. 25000-23-27-000-2001-0479-01  
Acumulados Nos. 2000-0428, 2001-0122, 2001-0343  
Actor: GUSTAVO MOYA ÁNGEL Y OTROS  
Acción Popular

- En cuanto a la obligación de diseñar, construir y ejecutar los planes maestros de acueducto y alcantarillado, el municipio ya tiene los diseños y está calculada la obra por \$20.000.000.000, valor que supera el presupuesto anual (\$1.181.537.000 asignado para agua potable y saneamiento básico para el año 2004). Por lo anterior se solicita se excluya al municipio de la contaminación del río Bogotá y que el plazo ordenado en primera instancia se prorrogue por 20 años más y se ajuste al presupuesto.
- Respecto a la obligación de asumir los costos de la operación y mantenimiento de las plantas de tratamiento de aguas residuales, no se puede asumir hasta que la CAR las deje en las condiciones técnicas requeridas, las optimice y las entregue en pleno funcionamiento. Por lo tanto se solicita se ordene a la CAR tomar las medidas pertinentes y condicionar el fallo al pleno funcionamiento de las PTAR.
- Que se exonere al municipio de la obligación de hacer aportes para la operación de la planta de tratamiento de aguas residuales que está proyectada construir por el Distrito Capital en el municipio de Soacha, ya que el municipio no es causante de dicha contaminación, corresponde a las empresas del distrito Capital desembolsar tales recursos.
- Con relación al aporte para la operación y mantenimiento del embalse del Muña, el municipio no es beneficiario de esta obra y no cuenta con los recursos para beneficiar a otros entes

Expediente No. 25000-23-27-000-2001-0479-01  
Acumulados Nos. 2000-0428, 2001-0122, 2001-0343  
Actor: GUSTAVO MOYA ÁNGEL Y OTROS  
Acción Popular

territoriales, lo que además daría lugar a un desvío de los recursos estatales.

Mas que motivos de impugnación de la sentencia constituyen argumentos a tener en cuenta en la sentencia, pues como se ha repetido la solución integral deberá tener presentes todos estos elementos relacionados con los aportes de cada una de las entidades municipales así como los compromisos que deberán cumplir en infraestructura, manejo de residuos, educación, etc.

44. El Municipio de Tabio, por medio de apoderado judicial interpuso recurso de apelación, en el efecto suspensivo contra la sentencia de 25 de agosto de 2004, (fl. 6280) con fundamento en las siguientes razones:

Se solicita revocar la sentencia de primera instancia conforme a lo siguiente:

- En la jurisdicción del municipio no existen vertimientos de aguas residuales sobre el río Bogotá y la represa del Muña, por lo tanto, no es necesario implementar programas de producción más limpia para las industrias.
- No existen productos agrícolas, ganados y pecuarios que se estén alimentando con aguas del río Bogotá o de la represa del Muña.
- Se realiza control de los vertimientos de aguas domesticas en la localidad con el direccionamiento de la secretaria de asuntos ambientales y recursos agropecuarios.

Expediente No. 25000-23-27-000-2001-0479-01  
Acumulados Nos. 2000-0428, 2001-0122, 2001-0343  
Actor: GUSTAVO MOYA ÁNGEL Y OTROS  
Acción Popular

- En el POT del municipio se contempló el manejo ambiental de la jurisdicción.
- Las últimas administraciones municipales han estado muy atentas al mejoramiento de las instalaciones del matadero municipal, acorde con los lineamientos fijados por las autoridades ambientales.
- El municipio continuamente realiza programas de recuperación de las fuentes hídricas.
- El municipio no pertenece a la cuenca alta del río Bogotá, por lo tanto no se le debe imponer la obligación de diseñar, construir y ejecutar los planes maestros de acueducto y alcantarillado en un plazo no mayor al 2009.
- Al momento de emitir el fallo el Tribunal no tuvo en cuenta el escaso presupuesto municipal que impide cumplir a satisfacción las necesidades básicas del municipio y realizar las obras tendientes a la separación de las redes de alcantarillado pluvial de las de alcantarillado de aguas negras.
- El Consejo de Estado debe analizar que los habitantes del municipio, especialmente el sector de la Vereda Paloverde Chicú se encuentran gravemente afectados por el estado actual de la planta de tratamiento de aguas residuales que maneja la CAR y la que hace muchos años no se le hace el tratamiento adecuado.
- El municipio no comparte el hecho de que por recibir algunos recursos de EMGESA deba estar obligado a realizar aportes para la operación de la planta de tratamiento de aguas residuales que está proyectado construir en el municipio de Soacha, PTAR CANOAS, cuando es obligación del Distrito Capital asumir la

Expediente No. 25000-23-27-000-2001-0479-01  
Acumulados Nos. 2000-0428, 2001-0122, 2001-0343  
Actor: GUSTAVO MOYA ÁNGEL Y OTROS  
Acción Popular

totalidad de dichos costos, de conformidad con lo establecido en la Ley de Servicios Públicos.

- Tampoco el municipio está de acuerdo con la obligación de aportar para la operación y mantenimiento de las PTAR, que las empresas de E.E.E.B y EMGESA están proyectando construir en el embalse del Muña.

Solicita: Revocar la sentencia en cuanto al municipio de Tabio se refiere.

No hay lugar a revocar la sentencia respecto del municipio de Tabio por cuanto todos los municipios de la Cuenca impactan el río Bogotá y sus afluentes así sea solamente respecto de los vertimientos de aguas residuales de origen doméstico, sin embargo, dado que la solución ha de ser integral lo que significa que deberán adoptarse las medidas necesarias para lograr la solución técnica, financiera y ambiental con la participación de todas las entidades y particulares que se benefician del recurso hídrico, acorde con sus presupuestos, recursos y daño ambiental.

**45. El municipio de Suesca**, por medio de apoderada judicial para lo cual adjunta poder interpuso recurso de apelación en contra de la sentencia de 25 de agosto de 2004, en cuanto no comparte las decisiones que allí se tomaron y que se relacionan de manera directa e indirecta con el municipio demandado en cuanto vulnera sus derechos y el presupuesto con que cuenta.

Sustenta el recurso en los siguientes términos:

Expediente No. 25000-23-27-000-2001-0479-01  
Acumulados Nos. 2000-0428, 2001-0122, 2001-0343  
Actor: GUSTAVO MOYA ÁNGEL Y OTROS  
Acción Popular

- Inexistencia del daño ambiental por parte del municipio, porque no vierte las aguas residuales directamente al río Bogotá sin previo tratamiento pues cuenta con una laguna de aguas residuales a la cual se vierten tales desechos, derivado de un acuerdo interinstitucional celebrado entre el municipio y la CAR para evitar verter al río elementos contaminantes, razón por la cual el municipio no tiene ninguna obligación de contribuir a los gastos de diseño y construcción de futuras plantas de tratamiento ya que es política del municipio evitar los medios de contaminación de la región especialmente el río Bogotá. Para comprobar lo anterior, como medida de protección se cerró el matadero municipal.
- Responsabilidad de terceros, porque cuando el río pasa por el municipio ya llega contaminado, afectando a campesinos y pobladores de la región. Se debe tener en cuenta que los agentes más contaminantes del río Bogotá son el Distrito Capital y el municipio de Soacha, quienes por su inmensa población y por falta de verdaderas plantas de tratamiento de aguas residuales simplemente vierten sus aguas negras al afluente.
- No existe responsabilidad del municipio de Suesca en los hechos motivo de este proceso dado que la contaminación alegada es causada por terceros cuya existencia y realidad suministra claramente el proceso y de afectar la salubridad del río su grado de participación es ínfimo frente a los demás responsables.

Expediente No. 25000-23-27-000-2001-0479-01  
Acumulados Nos. 2000-0428, 2001-0122, 2001-0343  
Actor: GUSTAVO MOYA ÁNGEL Y OTROS  
Acción Popular

- El municipio no está recibiendo ningún beneficio de las aguas del río debido a que no las utiliza para su acueducto de consumo humano, ni para generar energía, tampoco para algún tipo de industria. Por el contrario, son explotadas por grandes empresas como EMUELA y la EEEB para la producción de energía. Luego las plantas de tratamiento que se están ordenando deberán ser construidas en Bogotá, el Muña o Soacha y a sus expensas, por ser beneficiarios directos de las aguas.
- En cuanto a la contribución para la construcción de las plantas de tratamiento a su juicio resulta injusta, violatoria de los derechos fundamentales de sus habitantes y porque minimiza el presupuesto del municipio.

En estos términos solicita:

Revocar la sentencia en lo relacionado con la orden de participación económica del presupuesto para la construcción de las plantas de tratamiento, toda vez que el municipio no es agente contaminante del río Bogotá, no explota sus aguas y no se beneficia de forma directa de él, como sí las grandes empresas del sector privado.

La Sala considera que el municipio como todos los demás que impactan el río Bogotá y sus afluentes deben participar en la solución integral, razón por la cual no procede la revocatoria de la sentencia apelada.

46. El municipio de Sopó, por medio de apoderado judicial reconocido en el proceso interpuso recurso de apelación

Expediente No. 25000-23-27-000-2001-0479-01  
Acumulados Nos. 2000-0428, 2001-0122, 2001-0343  
Actor: GUSTAVO MOYA ÁNGEL Y OTROS  
Acción Popular

en escrito radicado el 4 de septiembre de 2004 y sustentado en escrito presentado el 24 de febrero de 2005, (fls. 6471 y 7038) en los siguientes términos:

- La parte atacada del fallo dispone la condena en costas a favor de los accionantes, *"las cuales se liquidarán en su oportunidad y cargo por partes iguales de todos los entes demandados con excepción de EMCOCABLES S.A., de acuerdo con lo señalado en las motivaciones. Así mismo, para garantizar el cumplimiento de esta sentencia se dispone que las entidades públicas demandadas realicen las correspondientes apropiaciones dentro de sus respectivos presupuestos y en cuanto a las realizadas en la presente vigencia procédase en la forma dispuesta en la ley a realizar la correspondiente reserva con el fin de que las obras que no se hubiesen construido no pasen a vigencias expiradas y se cancele el respectivo gasto"*.

Al respecto la entidad demandada manifiesta su inconformidad con la sentencia así:

- En el litigio no se incurrió en gastos procesales para que se convirtieran en costas; las agencias en derecho representan una contraprestación por los gastos en que la parte triunfante incurrió para ejercer la defensa judicial de sus intereses.
- En el expediente no se acreditó el pago de servicios profesionales de abogado y por lo tanto no se incurrió en gastos de honorarios.

Expediente No. 25000-23-27-000-2001-0479-01  
Acumulados Nos. 2000-0428, 2001-0122, 2001-0343  
Actor: GUSTAVO MOYA ÁNGEL Y OTROS  
Acción Popular

- La Nación, los Departamentos y los Municipios son personas de derecho público, para que estas puedan reconocer las expensas requeridas para surtir el proceso, debieron ser acreditadas por los accionantes, cosa que no se hizo.
- Se debe exonerar al Municipio de Sopo del pago de las costas por ser persona de derecho público, que actúa no en defensa de intereses privados, sino por los intereses de la comunidad en desarrollo del artículo 1º de la Constitución Política.
- Al disponer la aprobación del pacto de cumplimiento (fls. 308 a 309), no hay lugar a condena de costas, ya que la audiencia especial de pacto de cumplimiento prevista en el artículo 27 de la Ley 472 de 1998, equivale a una conciliación, y por lo tanto, no procede la condena en costas.

En la sustentación del recurso agrega que el municipio de Sopó no es tributario directo del Río Bogotá, éste ingresa a sus inmediaciones, aguas debajo de la planta de Tibitoc, razón por la cual no puede endilgársele responsabilidad directa en su contaminación.

Los vertimientos del municipio vienen siendo tratados mediante sistemas anaeróbicos en laguna de oxidación que ha venido siendo operada por la CAR, planta que se halla en funcionamiento desde 1994, por virtud del Convenio Interinstitucional 147 de 1991.

El desarrollo del Plan Maestro de Alcantarillado enmarcado dentro del Plan Básico de Ordenamiento Territorial aprobado por la CAR, constituyen las bases

Expediente No. 25000-23-27-000-2001-0479-01  
Acumulados Nos. 2000-0428, 2001-0122, 2001-0343  
Actor: GUSTAVO MOYA ÁNGEL Y OTROS  
Acción Popular

relevantes para la presentación del proyecto de pacto de cumplimiento dentro de la acción popular.

Si hubo aprobación del pacto de cumplimiento presentado por el municipio, no se entiende cómo se imponen obligaciones a los municipios que reciben transferencias de EMGESA o en general, del sector eléctrico para descontar el que les corresponde aportar para la operación y mantenimiento de la PTAR Canoas en la forma como se contempla en la parte motiva del fallo.

Estos recursos por mandato del artículo 45 de la Ley 99 de 1993, sólo podrán ser utilizados por los municipios en las obras previstas en el Plan de Desarrollo Municipal con prioridad de los proyectos de saneamiento básico y mejoramiento ambiental, razón por la cual dicha orden judicial debe ser revocada, así como aquellos acápites de la sentencia que imponen obligaciones y compromisos adicionales no contemplados en los proyectos presentados pues su aprobación fue pura y simple por parte de la magistrada ponente.

Por último señala que el reconocimiento de los incentivos a favor de los accionantes decretado en el numeral décimo primero de la sentencia principal, no corresponde a la filosofía, cuantía y fines de los mismos, razón por la cual también deben ser revocados y circunscribirse al marco dispuesto por la Ley 472 de 1998, artículo 39 y en proporción a la actividad desplegada por los accionantes, más aún cuando se supera el límite indicado por la norma en cita que los determina entre un mínimo de 10 y un máximo de 150 salarios mínimos mensuales.

Expediente No. 25000-23-27-000-2001-0479-01  
Acumulados Nos. 2000-0428, 2001-0122, 2001-0343  
Actor: GUSTAVO MOYA ÁNGEL Y OTROS  
Acción Popular

El fallo tal como fue redactado sólo condena al pago del incentivo a la "entidades" desconociendo el principio de igualdad en cuanto no lo hace para las empresas o entes de carácter privado.

Los motivos de impugnación están referidos a las costas, el incentivo, el grado de responsabilidad y las obligaciones a cargo del municipio, así como los plazos para su cumplimiento, todo ello será objeto de definición en los términos ya definidos para todos los apelantes que plantearon la misma inconformidad.

47. El municipio de Bojacá, según consta a folio 6057, interpuso recurso de apelación contra la sentencia de 25 de agosto de 2004, el 8 de septiembre de 2004, el cual no sustentó.

48. El municipio de Chocontá, por medio de apoderado judicial en escrito radicado el 6 de septiembre de 2004 (fl. 5878), discrepó de la sentencia en los siguientes términos:

La decisión se produjo al margen de las posibilidades más que de orden económico (en cuanto contemplan la posibilidad de cofinanciación), sí de los trámites a las que las mismas han de estar sujetas, desconociendo el factor tiempo y los términos de la contratación administrativa. Agrega que en cuanto a la posibilidad de garantizar la operatividad y el mantenimiento de la PTAR, señala que si bien a la fecha se cuenta con un instrumento legal (Resolución de la CRA 287 de 2004),

Expediente No. 25000-23-27-000-2001-0479-01  
Acumulados Nos. 2000-0428, 2001-0122, 2001-0343  
Actor: GUSTAVO MOYA ÁNGEL Y OTROS  
Acción Popular

para incluir este pago con cargo a las tarifas de acueducto y alcantarillado, aún si se hiciera viable el subsidio, esta posibilidad queda sujeta a los estudios de estratificación con ajuste a las respectivas metodologías de planeación, así como la falta de disponibilidad de recursos asignados para la actual vigencia presupuestal, no da cabida a que el municipio de entrada acarree transitoriamente con dicho gasto.

Finalmente manifiesta su inconformidad en relación con el incentivo en cuanto se deja de señalar dicha retribución a costa de los demás entes del orden público así como de la empresa privada, convocadas al proceso y el estimativo no refleja el compromiso que le asiste al Distrito Capital, frente a las demás entidades comprometidas.

Los motivos de inconformidad coinciden con los demás municipios en cuanto a tiempos de ejecución de las obras de infraestructura, recursos y financiamiento, así como el incentivo, los cuales ya han sido objeto de consideración por esta Sala y serán precisados y resueltos en un solo acápite en la parte resolutive acorde con las consideraciones esbozadas anteriormente.

49. El municipio de Cucunubá, por medio de apoderado judicial, cuyo poder adjunta con el escrito radicado el 8 de septiembre de 2004 obrante a folio 6220, interpuso el recurso de apelación contra la sentencia de 25 de agosto de 2004, la cual no sustentó en la oportunidad procesal correspondiente.

Expediente No. 25000-23-27-000-2001-0479-01  
Acumulados Nos. 2000-0428, 2001-0122, 2001-0343  
Actor: GUSTAVO MOYA ÁNGEL Y OTROS  
Acción Popular

50. El municipio de La Mesa en escrito radicado el 8 de septiembre de 2004, por medio de apoderado judicial interpuso recurso de apelación en contra de la sentencia de 25 de agosto de 2004, el cual no sustentó en la oportunidad procesal correspondiente.

51. El Municipio de Sesquilé a través de su representante legal interpuso recurso de apelación contra la sentencia de primera instancia en escrito radicado el 7 de septiembre de 2004, obrante a folio 5916, el cual no fue sustentado en la oportunidad procesal correspondiente.

52. La Empresa Colombiana de Cables S.A. -EMCOCABLES- en ejecución de arreglo de reestructuración, solicitó en memorial radicado el 8 de septiembre de 2004, aclaración del numeral sexto de la sentencia de 25 de agosto de 2004 en el sentido de que se precise que la empresa no es agente contaminador del río Bogotá, ni de sus quebradas o afluentes y subsidiariamente interpone recurso de apelación contra el primer aparte del numeral primero del "resuelve" de la sentencia, en consonancia con el numeral sexto, en cuanto a la omisión de determinar, como se hizo en la parte motiva, y como se deriva del pacto de cumplimiento aprobado, que el demandado no incurre en contaminación del río Bogotá ni de ningún otro cuerpo de agua.

Al respecto la Sala considera que la responsabilidad de la sociedad será resuelta en conjunto y acorde con el cumplimiento de las obligaciones a cargo así como de la carga contaminante con el planteamiento general para la solución integral.

Expediente No. 25000-23-27-000-2001-0479-01  
Acumulados Nos. 2000-0428, 2001-0122, 2001-0343  
Actor: GUSTAVO MOYA ÁNGEL Y OTROS  
Acción Popular

53. La Sociedad UNICONIC S.A. por medio de su representante legal interpuso recurso de apelación (fl. 6364) contra el fallo proferido por el Tribunal de Cundinamarca por considerar que la sociedad puede eventualmente resultar afectada en sus derechos adquiridos y desconocer sus derechos constitucionales y legales como consecuencia de la orden impartida en el numeral 3° y/o demás numerales del proveído que se impugna por lo que solicita se revoque la sentencia en los aspectos que afecten a la sociedad y reconocer la indemnización a que haya lugar con ocasión de los perjuicios que se pudieren causar a título de restablecimiento del derecho. No concedido por falta de legitimación.

54. La Sociedad CONIGRAVAS S.A., en escrito radicado el 8 de septiembre de 2004, (fl. 6368) interpuso recurso de apelación contra el fallo proferido por el Tribunal de Cundinamarca por considerar que la sociedad puede eventualmente resultar afectada en sus derechos adquiridos y desconocer sus derechos constitucionales y legales como consecuencia de la orden impartida en el numeral 3° y/o demás numerales del proveído que se impugna por lo que solicita se revoque la sentencia en los aspectos que afecten a la sociedad y reconocer la indemnización a que haya lugar con ocasión de los perjuicios que se pudieren causar a título de restablecimiento del derecho (fl. 6368). No fue concedido por falta de legitimación.

### **CONCLUSIONES**

Expediente No. 25000-23-27-000-2001-0479-01  
 Acumulados Nos. 2000-0428, 2001-0122, 2001-0343  
 Actor: GUSTAVO MOYA ÁNGEL Y OTROS  
 Acción Popular

## LA PROTECCIÓN DEL RÍO BOGOTÁ, PASA POR UNA RENOVACIÓN INSTITUCIONAL Y UN REPENSAR LA ESTRATEGIA COMÚN DE SANEAMIENTO DE ESA CUENCA EN SU INTEGRIDAD

Con la Constitución de 1991 y el desarrollo de las acciones constitucionales el Juez ha empezado a asumir, como lo expresa Nestor Cafferatta<sup>246</sup>, la responsabilidad por la armonización de la relación entre la vida y su protección mediante el derecho, para adoptar un papel activo, que implica desarrollar, dentro de un marco lógico, una tutela que permita una actuación a la vez preventiva, continua, eficaz, enérgica, anticipatoria, temprana, dinámica, rápida, flexible, vigorosa, colaboradora, y mitigadora en aquellos aspectos en que la acción de la naturaleza y, en especial, la actividad antropocéntrica, han puesto en riesgo los ecosistemas cuyo valor para la preservación del agua como un derecho humano y del equilibrio ecológico que la sustenta, son indiscutibles.<sup>247</sup>

Es por ello que en la providencia que resuelve la acción popular encaminada al saneamiento del Río Bogotá, se ha

---

<sup>246</sup> Cafferatta Nestor, "El Rol del Juez "Programa de las Naciones Unidas para el Medio Ambiente. PNUMA Jurisprudencia ambiental; Selección y análisis de casos relevantes en América Latina. Serie Documentos sobre Derecho Ambiental. Documento 16.

<sup>247</sup> Para ampliar véase Peyrano, Jorge W., *El perfil deseable del juez civil del Siglo XXI*, JA, 2001. IV, fascículo No.2), Kemelmajer de Carlucci, Aída, "Justicia y Desarrollo", Ed., boletín del 24/12/1993, distingue entre dos modelos: el de la reforma estructural, protagónico, activo y el de la resolución de disputas, de constricción o limitación. En el derecho comparado, se destaca el trabajo de Freire da Silva, Anderson Furlan, *Activismo judicial en materia ambiental*, p.59, parodiando a Baur, Fritz, "El papel activo del juez", *Revista de Proceso*, No. 27, jul/sept/ 1982, en obra colectiva *Direito ambiental em evolucao*, coordinado por Passos de Freitas, Vladimir, N° 3, 2002, Jurúa Editora.

Expediente No. 25000-23-27-000-2001-0479-01  
Acumulados Nos. 2000-0428, 2001-0122, 2001-0343  
Actor: GUSTAVO MOYA ÁNGEL Y OTROS  
Acción Popular

adoptado un enfoque interdisciplinario, sistémico e interinstitucional para abordar la recuperación y conservación del hidrosistema fluvial de la Cuenca del Río Bogotá de una manera integral.

De esta manera se procede a realizar una síntesis de la problemática que debió contemplar el Consejo de Estado, el diagnóstico del problema referido principalmente a (i) la inexistencia de una política única en relación con la recuperación del Río Bogotá: (ii) la existencia de una dispersión de recursos y esfuerzos en materia de información, planeación, gestión, coordinación interinstitucional de proyectos y recursos tecnológicos financieros y humanos, cuya armonización es necesaria en virtud de a) la superposición de actores contaminadores, autoridades y competencias; b) la poca integración interinstitucional y la fragilidad de la policía ambiental; (iii) el incumplimiento de la normativa ambiental en las diferentes problemáticas que se presentan en las cuencas alta, media y baja, así como en el conjunto de la Cuenca por la alteración grave del sistema y la pérdida de biodiversidad.

Adicionalmente, ésta síntesis abordará las fórmulas acordadas para una solución integral a la problemática ambiental, que permita aprehender la complejidad del funcionamiento, recuperación y mantenimiento de la Cuenca del Río Bogotá.

Dicha solución integral comprende (i) la articulación interinstitucional e integración de instrumentos de gestión, planeación y observación; (ii) la integración de

Expediente No. 25000-23-27-000-2001-0479-01  
Acumulados Nos. 2000-0428, 2001-0122, 2001-0343  
Actor: GUSTAVO MOYA ÁNGEL Y OTROS  
Acción Popular

instrumentos financieros, así como técnicos y de monitoreo comunes para la operación regular y circunstancias extraordinarias del río; y (iii) la implementación de proyectos comunes y específicos según las competencias constitucionales y legales de los diferentes actores involucrados.

Finalmente, se especificará la forma de implementar la solución, que incluye una autoridad de Cuenca conformada en principio por un Consejo Estratégico de Cuenca el cual se convertirá en una Gerencia Estratégica de Cuenca mediante proyecto de Ley, que deberá presentar el Ministerio de Medio Ambiente. Dicha autoridad es la llamada a coordinar los diferentes aspectos relacionados con la complejidad ambiental de la Cuenca del Río Bogotá, y esta orientada a (i) una gestión integrada del mencionado hidrosistema que permita la unidad de manejo de los recursos hídricos y la articulación con los instrumentos de ordenamiento territorial, así como (ii) un mejoramiento continuo y sostenible de la calidad de vida de los habitantes.

#### **I. PROBLEMA PLANTEADO**

- A. Uno de los Sistemas Hídricos más contaminados del mundo y que acusa un grave deterioro ecológico y daño a su ecosistema
- B. Un sistema hídrico con problemas diferentes en los subsistemas de las Cuencas Alta, Media y Baja con escasos recursos para una solución

Expediente No. 25000-23-27-000-2001-0479-01  
 Acumulados Nos. 2000-0428, 2001-0122, 2001-0343  
 Actor: GUSTAVO MOYA ÁNGEL Y OTROS  
 Acción Popular

- C. Un serio problema de ordenamiento territorial y uso del suelo, en el Departamento y los municipios con los cuales existe una influencia recíproca el río.
- D. Ausencia de voluntad política del Estado en lo relacionado específicamente con la Nación para poner en marcha una política pública ambiental.

## II. DIAGNOSTICO DEL PROBLEMA

### A. NO EXISTE UNA POLÍTICA ÚNICA EN RELACIÓN CON LA RECUPERACIÓN DEL RÍO BOGOTÁ.

El Sistema Nacional Ambiental no funciona como tal, así que no coordina ni ejerce ningún liderazgo con respecto a los desafíos que presenta la Cuenca del Río Bogotá. La diversidad de modalidades de intervención sobre la Cuenca (esquemas de transferencia, cooperación o división de responsabilidades), acompañada de la emergencia de nuevos actores, es traducida por un entrecruzamiento creciente de las competencias y estructuras que ha complejizado la gestión del agua y reduce la visibilidad de su lectura, al momento de tomar las decisiones adecuadas y establecer responsabilidades.

La elaboración de esa política pública común, debe superar tres grandes problemas: El primero porque se trata de someter las relaciones interinstitucionales a una repartición, inadecuada e imposible de las competencias de una manera estricta e intangible. El segundo porque se carece de una masa crítica

Expediente No. 25000-23-27-000-2001-0479-01  
Acumulados Nos. 2000-0428, 2001-0122, 2001-0343  
Actor: GUSTAVO MOYA ÁNGEL Y OTROS  
Acción Popular

financiera suficiente que ningún nivel pueda alcanzar por él solo donde se requieren grandes inversiones. La tercero es evitar las contradicciones entre los diferentes niveles de los entes nacionales, regionales, distritales y municipales a partir del principio de corresponsabilidad.

En términos generales la política aplicable a la Cuenca del Río Bogotá, está en una amplia medida, determinada por sus finalidades reguladoras. La normatividad que se establezca para los usos del agua aparece menos conciliadora de sus intereses que reguladora de éstos y reductora de los conflictos que podrían nacer de estas divergencias de interés.

Llegamos progresivamente a una regla del derecho cada vez más concertada, resultado de una visión colectiva de la gestión del agua. La gestión equilibrada de la Cuenca del Río Bogotá, debe permitir satisfacer o conciliar todos los usos del agua y del suelo, a la luz del interés general de la misma como Ecosistema. En su implementación el derecho del agua se coloca en una lógica de arbitraje que invita a los usuarios a aceptar el restringirse a si mismos, antes de que vengan las medidas drásticas de la sentencia y de las autoridades que las imponen, de suspensión o cierre de actividades.

El trabajo interinstitucional enriquece la técnica de regulación. En situaciones de crisis como la del

Expediente No. 25000-23-27-000-2001-0479-01  
Acumulados Nos. 2000-0428, 2001-0122, 2001-0343  
Actor: GUSTAVO MOYA ÁNGEL Y OTROS  
Acción Popular

Río Bogotá, la regulación constituye una técnica muy expedita para abordar situaciones complejas, y como en el dominio del agua y del uso del suelo, diferentes niveles de actores, con intereses a veces encontrados, y de normas que se entrelazan, con la advertencia además que existen múltiples centros de poder y de decisión. También se requiere conciliar las diferentes tonalidades, a partir de las cuales se abordan fenómenos como los del Sistema Hídrico del Río Bogotá, donde se hace necesario vía regulación, organizar jurídicamente las relaciones entre los actores, de manera tal que se permita garantizar la cohesión de la acción pública.

La regulación encontrará el *modus vivendi* entre los siguientes enfoques y sensibilidades que se predicen en esta polifonía fluvial, a saber. El primer enfoque observa los ríos, bajo el ángulo de la propiedad como un espacio de responsabilidad de la gestión. El segundo considera el río como un componente del territorio a la vez, en su dimensión cultural, paisajista y recreativa. El tercero reduce el río, a un recurso y a un espacio de producción. La cuarta expresión, finalmente, privilegia la dimensión medioambiental de los ríos; al señalar que es un medio, y un espacio natural que favorece la biodiversidad.

El proceso implica: Concertación, información, conciliación, negociación. La finalidad de estas diferentes gestiones sigue siendo obtener una regulación óptima. De hecho, "la regulación es el

Expediente No. 25000-23-27-000-2001-0479-01  
Acumulados Nos. 2000-0428, 2001-0122, 2001-0343  
Actor: GUSTAVO MOYA ÁNGEL Y OTROS  
Acción Popular

ajuste, conforme a alguna regla o norma, de una pluralidad de movimientos o de actos y de sus efectos o producciones, que su diversidad o su sucesión los muestran en principio, extraños unos de otros". La regulación se apoya en el derecho comparado del agua, sobre dos técnicas que son la concertación y la contractualización.

La regulación en el derecho del agua, y en general, se ha denominado "la nueva mariposa de la normatividad" (Y. Gaudemet: La concurrence des modes et de niveaux de regulation). La regulación es una nueva fuente de producción del derecho, al menos del derecho en red.

De allí, "la regla se debe imponer, no por la fuerza ejecutorial, sino por su virtud convincente". El respeto de la norma, se impone "porque el derecho es una opinión que inspira, por su credibilidad, la adhesión". La limitación deja lugar a la regulación a través de la concertación. Pasamos progresivamente, como lo había mostrado M. Tismit, de la reglamentación a la regulación. El profesor Chevallier evoca el pasaje "de un derecho general y estable a un derecho flexible y blando, un derecho unitario a un derecho pluralista, de un derecho impuesto a un derecho negociado". Esta práctica anuncia la aparición "de una concepción muy diferente en derecho, marcada por el retroceso en el uso de los elementos limitantes de obligatoriedad y unilateralidad.

Expediente No. 25000-23-27-000-2001-0479-01  
Acumulados Nos. 2000-0428, 2001-0122, 2001-0343  
Actor: GUSTAVO MOYA ÁNGEL Y OTROS  
Acción Popular

Los mandamientos jurídicos tradicionales tienden a dejar su lugar a técnicas más flexibles, que provienen de un direccionamiento jurídico no autoritario de las conductas. Si existe la norma, esta no tiene más un carácter imperativo donde su aplicación no depende solo de la sumisión, sino de la adhesión de los destinatarios". El derecho es negociado y la restricción concertada. La regulación favorece de esta manera la legitimación de las decisiones. En efecto, "el destinatario de la regla, se expresa en este tema tanto en el momento de la concepción como en el de la aplicación, lo que le quita a ésta, la rigidez que le es tradicionalmente endilgada". Siempre, según el profesor Chevallier, "este movimiento tendiente a la producción de un derecho negociado reúne el fenómeno del pluralismo a partir del momento en donde culmina en una transferencia de competencias normativas". Esta descripción corresponde en particular, a la evolución del derecho del agua.

**B. EXISTE UNA DISPERSION DE RECURSOS Y ESFUERZOS EN MATERIA DE:**

Información, Planeación, Gestión, Coordinación interinstitucional de proyectos, y recursos tecnológicos, financieros, humanos. Esto hace necesario que sea el Consejo Estratégico de Cuenca (posterior Gerencia Estratégica de Cuenca una vez se apruebe el proyecto de ley), la que presente un proyecto, fije y organice los términos y modalidades de una acción común. Así se tratara la problemática

Expediente No. 25000-23-27-000-2001-0479-01  
Acumulados Nos. 2000-0428, 2001-0122, 2001-0343  
Actor: GUSTAVO MOYA ÁNGEL Y OTROS  
Acción Popular

de la Cuenca del Río Bogotá de una manera Sistémica y de manera tal, que se ajuste a una política ambiental única y definida, lo que coloca en operación efectiva al Sistema Nacional Ambiental.

### **1. Superposición de Actores contaminadores, autoridades y competencias**

La diversidad de los intereses que están en juego, la complejidad de una organización que comporta niveles centrales, descentralizados y desconcentrados; estructuras a cargo de ciertas responsabilidades pero a su vez privadas de medios propios para ejecutarlas, hacen ineficiente la normatividad jurídica debido a su poca capacidad de adaptarse de las normas que convergen a los diferentes contextos.

La planeación de los niveles nacional, regional, distrital y municipal en el Consejo Estratégico de Cuenca (posterior Gerencia Estratégica de Cuenca), con el apoyo de los Consejos de la Cuenca Alta, Media y Baja, permite la producción de un documento que enmarca y orienta la política de transformación positiva del Río. Esta forma de elaboración, permite participar en las primeras fases del proceso de planeación, a aquellos a quienes se destina. Este comité de sabios, compuesto esencialmente de "no juristas", participa en la creación jurídica. Esta instancia, constituye un cuadro privilegiado de intercambio y de negociación entre los diferentes actores comprometidos en la gestión del agua. La

Expediente No. 25000-23-27-000-2001-0479-01  
Acumulados Nos. 2000-0428, 2001-0122, 2001-0343  
Actor: GUSTAVO MOYA ÁNGEL Y OTROS  
Acción Popular

producción de esta "norma" planificadora, es así confiada a profesionales del agua poseedores de un "saber" que se presume refuerza su legitimidad y su pertinencia.

"Estos individuos pueden proveerse de una legitimidad "reconocida" socialmente y políticamente, bien sea porque han sido designados por un grupo de usuarios o una institución (representantes de colectividades territoriales, servidores del Estado o de las colectividades, organizaciones profesionales o sindicales, asociaciones de protección del medio ambiente,), o bien sea por que han sido "cooptados" en estas instancias por el hecho de una competencia probada en la materia. En otros términos, el marco institucional actual, debe permitir la expresión de los portavoces de grupos de interés y de las instituciones en causa, en favor de una estrategia común de solución de un problema mayúsculo que incumbe a todos.

Los Consejos de la Cuenca Alta, Media y Baja, trabajan con el Consejo Estratégico de Cuenca (posterior Gerencia Estratégica de Cuenca), un proceso territorial de definición del interés general, que substituye la imposición de objetivos y de programas de acción por el centro". La regulación aparece como un modo de dirección de conductas humanas. La regulación es una finalidad de la concertación; es igual para la contratación.

Expediente No. 25000-23-27-000-2001-0479-01  
 Acumulados Nos. 2000-0428, 2001-0122, 2001-0343  
 Actor: GUSTAVO MOYA ÁNGEL Y OTROS  
 Acción Popular

**2. La integración interinstitucional es muy leve y la Policía Ambiental muy frágil.**

a. La coordinación entre los niveles nacional, regional, Distrital y municipal es aun precaria

b. Pocos Convenios Generales Interinstitucionales

a. Limitación de recursos para inspecciones, visitas y monitoreo

b. Escasez de investigaciones por vertimientos y sanciones ambientales ejemplarizantes.

"La negociación parece convertirse en un modelo dominante de regulación de las relaciones sociales". El contrato aparece como un instrumento operacional de gestión concertada para el saneamiento de los ríos.

La diferentes leyes sobre el agua han substituido "a la administración tradicional que operaba a través de reglamentación y de medidas unilaterales, por una administración más negociada, más aceptada por los intereses y no más por medio de simples intercambios de puntos de vista y de trabajo en común, sino de verdaderos acuerdos" No por la noción de obligaciones que se pueden generar entre las partes contratantes, sino porque ellas suponen una concertación de los intervinientes y la reunión de un consenso.

Esta parece ser una fórmula adaptada a las nuevas necesidades. Se trata con estas instituciones, de

Expediente No. 25000-23-27-000-2001-0479-01  
Acumulados Nos. 2000-0428, 2001-0122, 2001-0343  
Actor: GUSTAVO MOYA ÁNGEL Y OTROS  
Acción Popular

asegurar en ciertos campos juzgados sensibles, un arbitraje imparcial y una visión pluralista. Las exigencias que de ellos emanan, se traducen en las condiciones de designación de los miembros de las autoridades administrativas independientes, la colegialidad que les caracteriza, las garantías de las cuales ellas disponen. Entre los poderes ejercidos "se encuentran atributos clásicos de autoridades administrativas: opinión, proposición, acuerdo, sanción, a veces nominación e incluso reglamentación. Pero más allá de estas modalidades de intervención, su rol se define más aún por la noción de regulación que implica una autoridad moral reconocida, una determinada flexibilidad en las formas de decisión, un apoyo también sobre la opinión. Las autoridades administrativas independientes contribuyen útilmente a la definición de un derecho adaptado a estos nuevos campos.

La noción de "patrimonio común de la nación", constituye un estándar de protección del agua, la reglamentación mostró sus límites frente a la diversidad y a la complejidad de las situaciones. Solo la instauración de una autoridad de regulación está en capacidad de poder responder eficazmente a los desafíos de una gestión equilibrada del agua y de los hidrosistemas fluviales.

Esta autonomía, reunida con la experticia técnica particular presume dar una legitimidad a su

Expediente No. 25000-23-27-000-2001-0479-01  
Acumulados Nos. 2000-0428, 2001-0122, 2001-0343  
Actor: GUSTAVO MOYA ÁNGEL Y OTROS  
Acción Popular

acción. Sobre el plano orgánico, la regulación implica la asociación de varios tipos de intervinientes (usuarios, representantes de la comunidad, Estado), entre los cuales la articulación no es ni natural ni espontánea y cuyo ajuste depende de la puesta en marcha de un regulador que coordine acciones inicialmente extrañas las unas de las otras. Este regulador, ocupa una posición de articulación, una especie de interface, entre varias estructuras en donde se trata de conciliar las lógicas de funcionamiento.

La concertación sub-utiliza el método empleado en estas instancias cuyo objetivo consiste en encontrar un modus vivendi. La regulación procura, así, asegurar el correcto funcionamiento de un conjunto considerado como complejo. Formalmente, la regulación consiste en la generalización de procedimientos de concertación previos y de participación de intereses en la toma de decisiones que son testigo, si no de una voluntad de consenso, al menos de una búsqueda sistemática de la adhesión de los actores del agua en el proceso normativo.

## **C. EL INCUMPLIMIENTO DE LA NORMATIVIDAD AMBIENTAL**

### **1. En la Cuenca Alta**

a. Curtimbres de Villapinzón y Chocontá.

Expediente No. 25000-23-27-000-2001-0479-01  
Acumulados Nos. 2000-0428, 2001-0122, 2001-0343  
Actor: GUSTAVO MOYA ÁNGEL Y OTROS  
Acción Popular

- b. Cultivos de papa que alteran los ecosistemas de Páramo y de Bosques en el nacimiento del Río Bogotá.
- c. Seria contaminación causada por la agroindustria y la actividad minera. Presión sobre aguas subterráneas generadas en cultivos de flores.
- d. Alta contaminación con patógenos, ausencia de oxígeno disuelto.

## **2. En la cuenca Media**

- a. Demanda de Agua muy Alta y caudales disponibles muy pocos.
- b. Seria contaminación causada por la agroindustria y la actividad minera. Problemas adicionales de sedimentación producida por la explotación de las canteras.
- c. Problemas generados por la urbanización.
- d. Contaminación causada por curtimbres en la localidad de San Benito.
- e. Alta contaminación con patógenos, ausencia total de oxígeno disuelto, basuras flotantes, grasas y olores.

## **3. En la Cuenca Baja**

- a. Contaminación causada por la agroindustria explotación industrial y agraria. Contaminación por explotación de la industria ganadera.
- b. Escasez del Recurso Hídrico.

Expediente No. 25000-23-27-000-2001-0479-01  
 Acumulados Nos. 2000-0428, 2001-0122, 2001-0343  
 Actor: GUSTAVO MOYA ÁNGEL Y OTROS  
 Acción Popular

- c. Vertimientos almacenamiento de aguas negras e el Embalse del Muña.
- d. Malos olores y notorio deterioro de la calidad de vida de la comunidad.
- e. Deterioro paisajístico por ausencia de caudal ecológico en el Salto Tequendama.

**4. En toda la Cuenca. Alteración grave del Sistema y Pérdida de biodiversidad.**

- a. Vertimientos ilegales en todas las tres Cuencas y Contaminación por aguas residuales domesticas.
- b. Inexistencia de la zona de alinderación de la zona de retiro en todo el Rio.
- c. Ineficiencia de las Plantas de Tratamiento.
- d. Estratificación inadecuada para los predios, lo que estimula la desidia en la descontaminación.

**III. SOLUCIÓN INTEGRAL**

**A. ARTICULACIÓN INTERINSTITUCIONAL E INTEGRACIÓN DE INSTRUMENTOS DE GESTIÓN, PLANEACIÓN Y OBSERVACIÓN**

- 1. CREACIÓN PROVISIONAL DEL CONSEJO ESTRATÉGICO DE CUENCA, QUE SE CONVERTIRÁ EN UNA GERENCIA ESTRATÉGICA DE CUENCA mediante proyecto de Ley,

Expediente No. 25000-23-27-000-2001-0479-01  
Acumulados Nos. 2000-0428, 2001-0122, 2001-0343  
Actor: GUSTAVO MOYA ÁNGEL Y OTROS  
Acción Popular

que deberá presentar el Ministerio de Medio Ambiente. Se Ordena la articulación en cabeza de la CAR con todos los proyectos de adecuación hidráulica y recuperación ambiental del Río Bogotá; con el Plan de Gestión Ambiental 2008-2038 de la Secretaria Distrital de Ambiente, el Plan Departamental de Aguas PDA de la Gobernación de Cundinamarca, las Evaluaciones del Agua ERA del IDEAM, y los demás instrumentos normativos para la gestión integral de la Cuenca Hidrográfica. "El derecho del agua nace de la comunidad del agua".

**2. REFUERZO DEL INSTRUMENTO DE PLANEACIÓN EXISTENTE.**

Se Ordena a la CAR **actualizar en forma inmediata el POMCA (Plan de Ordenación y Manejo de la Cuenca del Río Bogotá) y hacer la articulación con los Instrumentos de Planeación existentes. Además se le ordena que Asesore al Distrito Capital y a los entes territoriales aferentes del Río Bogotá, en el actual proceso de modificación de los POTS, PBOT y EOT, así como en su articulación con el POMCA.** Ya la CAR tiene a su cargo el **Fondo de Inversiones para la Adecuación del Río Bogotá -FIAB-** creado por el Acuerdo No. 28 de 2005 y modificado por el Acuerdo No. 15 de 19 de Junio de 2007, cuyas inversiones deben estar contempladas en el **POMCA.**

**3. REFUERZO DEL SISTEMA DE TOMA DE DECISIONES A PARTIR DE UN OBSERVATORIO COMÚN DEL RÍO.** Se Ordena al Consejo Estratégico de la Cuenca

Expediente No. 25000-23-27-000-2001-0479-01  
 Acumulados Nos. 2000-0428, 2001-0122, 2001-0343  
 Actor: GUSTAVO MOYA ÁNGEL Y OTROS  
 Acción Popular

Hidrográfica del Río Bogotá (Mientras se crea la Gerencia Estratégica de la Cuenca), la consolidación de un **Observatorio Regional Ambiental y de Desarrollo Sostenible del Río BOGOTÁ -OBARBO-** como instrumento común para lograr la dirección y gestión integral con base en una visión común de la Cuenca. Ya existía el Observatorio Distrital de Bogotá.

4. Se Declara que el **ejecutor de la Estrategia y Estrategias** será definido por el Consejo Estratégico de Cuenca, mientras se crea la Gerencia Estratégica de Cuenca por ley.
5. Se Ordena al **Ministerio de Medio Ambiente** que coordine y lidere la Implementación del **Consejo Estratégico de Cuenca, y haga su SECRETARIA TÉCNICA;** hasta tanto se cree la Gerencia Estratégica de Cuenca, mediante el proyecto de Ley, que el mismo **Ministerio deberá estar presentando en el término de seis meses al Congreso.**

**B. INTEGRACIÓN DE INSTRUMENTOS FINANCIEROS, ASÍ COMO TÉCNICOS Y DE MONITOREO COMUNES PARA LA OPERACIÓN REGULAR Y EN CIRCUNSTANCIAS EXTRAORDINARIAS DEL RÍO.**

1. **REFUERZO Y COORDINACIÓN DE LOS INSTRUMENTOS FINANCIEROS EXISTENTES.** Se Ordena al Consejo Estratégico de la Cuenca Hidrográfica del Río Bogotá (posteriormente Gerencia Integral de la Cuenca Hidrográfica del Río Bogotá) que

Expediente No. 25000-23-27-000-2001-0479-01  
Acumulados Nos. 2000-0428, 2001-0122, 2001-0343  
Actor: GUSTAVO MOYA ÁNGEL Y OTROS  
Acción Popular

constituya temporalmente el **Fondo Común de Cofinanciamiento -FOCOF-** hasta tanto se expida la correspondiente ley de creación. (Integración de los Recursos destinados al Río: **FIAP + FOCOF**)

2. **REFUERZO Y COORDINACION DE LOS SISTEMAS DE INFORMACION Y MONITOREO EXISTENTES. ARTICULACIÓN TÉCNICA INTEGRAL.** Se Ordena al Consejo Estratégico de la Cuenca Hidrográfica del Río Bogotá, desarrollar e implementar el **Sistema Regional de Información Ambiental** para la Gestión Integral de la Cuenca Hídrica del Río Bogotá - **SIGICA RÍO BOGOTÁ**- que permita el registro, almacenamiento, validación, modelación, monitoreo, control, evaluación, y divulgación de toda la información relacionada con la cuenca hidrográfica del Río Bogotá.

**C. IMPLEMENTACIÓN DE PROYECTOS COMUNES Y ESPECÍFICOS SEGÚN SUS COMPETENCIAS CONSTITUCIONALES Y LEGALES.**

#### **IV. IMPLEMENTACIÓN GENERAL DE LA SOLUCIÓN**

La decisión se encuentra orientada a:

1.- La **Gestión Integral de la Cuenca Hidrográfica del Río Bogotá.** Unidad de manejo de los Recursos del Sistema Hídrico, y articulación con los instrumentos de ordenamiento territorial.

2.- **Mejoramiento continuo y sostenible de la calidad de vida de sus habitantes.**

Expediente No. 25000-23-27-000-2001-0479-01  
Acumulados Nos. 2000-0428, 2001-0122, 2001-0343  
Actor: GUSTAVO MOYA ÁNGEL Y OTROS  
Acción Popular

## **V. IMPLEMENTACIÓN ESPECÍFICA DE LA SOLUCIÓN**

El Estado debe detentar el poder de gestión sobre las aguas de su territorio, siempre con un objetivo primordial de defensa del interés general. Por esta razón en la legislación en los diferentes países, o el denominado derecho del agua, se observa en forma histórica, una tendencia a extender las prerrogativas y los poderes de las autoridades ambientales. Esta tendencia se fortalece en el derecho ambiental con la intervención de la reglamentación y de la regulación.

La Reglamentación de las intervenciones públicas tiene en el Ministerio de Medio Ambiente su principal coordinador. En efecto, este despacho tiene en teoría la obligación de orientar la coordinación intergubernamental, y por ende las acciones del Estado en favor de la preservación y conservación de los sistemas hídricos existentes. Su papel debería ser, celebrar y promover todas las convenciones con los entes territoriales y establecimientos públicos del Estado que sean necesarias, para lo cual debería adelantar una planeación de los empréstitos internacionales y nacionales de corto, mediano y largo plazo con objetivos definidos en cada sistema hídrico, que asegure las inversiones y la sostenibilidad de los ecosistemas en causa. Por otra parte, debería tener un papel mucho más activo en el impulso de la Planeación en materia del agua y los ecosistemas, a partir de una verdadera política integral para la gestión del recurso, apoyado en los objetivos constitucionales y legales. En períodos de crisis debe

Expediente No. 25000-23-27-000-2001-0479-01  
Acumulados Nos. 2000-0428, 2001-0122, 2001-0343  
Actor: GUSTAVO MOYA ÁNGEL Y OTROS  
Acción Popular

estar continuamente informando de las medidas emprendidas a todos los entes y establecimientos públicos del Sistema Nacional Ambiental en el marco de la zona de alerta, o en caso de incidente o accidente, para que exista una reacción adecuada y oportuna al daño causado y a la neutralización de sus causas.

En el caso del Río Bogotá, la participación del Ministerio de Ambiente tiene que trascender las declaraciones de buena voluntad del Gobierno para constituirse en el principal apoyo de La Corporación Autónoma Regional, de la Secretaria Ambiental del Distrito Capital, y de los entes territoriales aferentes al Río Bogotá. Esta aproximación está aún muy lejos de materializarse en forma efectiva, y se hace necesaria una política de salvación de la Cuenca, que mejore la visibilidad y la eficacia de la acción de la Administración Nacional.

El Sistema Nacional Ambiental apunta a suplir esa finalidad y posee los suficientes instrumentos constitucionales y legales, por lo que se debe dar la voluntad política común, que se ha apreciado en las cerca de cincuenta reuniones que el despacho, sostuvo con dicha institucionalidad. El tratamiento uniforme de los servicios de la denominada Policía Ambiental, implica la cooperación entre entes y organizaciones que integran dicho Sistema.

Estas reflexiones iniciadas deben consolidar un proceso desapasionado de concertación e intercambio de experiencias que se prolongue en el tiempo, y que tenga

Expediente No. 25000-23-27-000-2001-0479-01  
Acumulados Nos. 2000-0428, 2001-0122, 2001-0343  
Actor: GUSTAVO MOYA ÁNGEL Y OTROS  
Acción Popular

como resultado el reforzamiento institucional (profundizar sus propias identidades), para afirmar la solidaridad (interinstitucional), y lograr el fin último que se propone la sentencia, como es la Gestión Integral de la Cuenca Hidrográfica del Río Bogotá, a partir de la Unidad de manejo de los Recursos del Sistema Hídrico por el Consejo Estratégico de Cuenca (que legalmente se convertirá en la Gerencia Estratégica de Cuenca), así como la articulación con los instrumentos de ordenamiento territorial (POMCA, POTS, PBOT, ETOB; lo que redundará en el mejoramiento continuo y sostenible de la calidad de vida de todos los habitantes de la Cuenca y de sus descendientes.

Esta concertación interinstitucional ejecutará las estrategias, programas, proyectos y, en general, todas las acciones que sean priorizadas por sus integrantes institucionales en el seno del Consejo, hasta tanto se constituya legalmente la Gerencia Estratégica de Cuenca, para la recuperación integral del Río Bogotá, y su sostenibilidad. Dicha concertación propenderá por la correcta administración del recurso hídrico y del territorio, el desarrollo económico y social, sanitario, cultural y científico, así como a la protección de los ecosistemas y el mejoramiento de la calidad de vida de los habitantes de la Cuenca. El CECH será apoyado por los Consejos de Cuenca Alta, Media y Baja que aportarán la información disponible y participarán en la fases previas a la elaboración y declaratoria del Plan de Manejo y Ordenación de la Cuenca Hidrográfica del Río Bogotá-POMCA-.

Expediente No. 25000-23-27-000-2001-0479-01  
Acumulados Nos. 2000-0428, 2001-0122, 2001-0343  
Actor: GUSTAVO MOYA ÁNGEL Y OTROS  
Acción Popular

La gerencia estratégica de Cuenca constituye el lugar de síntesis para concebir la ejecución conjunta de proyectos que se realizará en forma plurianual de acuerdo con los términos estimados por la propia Gerencia de Cuenca (previamente Consejo Estratégico de Cuenca) en Plan de Manejo y Ordenación de la Cuenca Hidrográfica del Río Bogotá-POMCA- donde se consagran, entre otras, las inversiones y las medidas a adoptar. Dicho Plan efectuará una priorización de las necesidades y una selección de las acciones a realizar según los recursos disponibles en cada institución que la conforma, además de los apropiados por el Gobierno Nacional con el mismo fin.

Para lograr tales cometidos hay que reforzar a su vez los programas de vigilancia integral de la Cuenca al reunir todas las ópticas parciales e institucionales en el Observatorio Regional Ambiental y de Desarrollo Sostenible del Río Bogotá -ORARBO- y un Sistema Regional de Información Ambiental - SIGICA RÍO BOGOTA- que permita tomar las decisiones más importantes desde la perspectiva interinstitucional, interdisciplinaria que correspondan a los subsistemas que constituye cada Cuenca, así como al Sistema Hídrico Integral, asociado a los planeación territorial que se propone.

El Fondo de Inversiones para la Adecuación del Río Bogotá -FIAB-, creado mediante Acuerdo 28 de 2005 y modificado por el Acuerdo 15 del 19 de junio de 2007; será reforzado con la constitución, y posterior creación del Fondo Común de Cofinanciamiento -FOCOF- lo que constituirá el instrumento financiero para apalancar los programas, las

Expediente No. 25000-23-27-000-2001-0479-01  
Acumulados Nos. 2000-0428, 2001-0122, 2001-0343  
Actor: GUSTAVO MOYA ÁNGEL Y OTROS  
Acción Popular

acciones, así como la intervención técnica integral y regular sobre la Cuenca del Río Bogotá.

La solución incluye además los requerimientos de infraestructura que contemplan los aspectos relacionados con (i) el tratamiento secundario con Desinfección de Salitre y (ii) la Construcción de la PTAR CANOAS. Todo ello va unido a una serie de actividades vinculadas necesariamente al proceso de recuperación del Río que incluyen (iii) la recolección de Vertimientos industriales, domésticos y agrícolas a través de sistemas distritales y municipales de acueducto y alcantarillado y (iv) la conectividad con todos los interceptores construidos y tratamiento a través de las dos Plantas, así como de las Plantas de Tratamiento Municipales.

El siguiente cuadro ilustra la estrategia sistémica y la integración de esfuerzos institucionales planteada en la providencia.

**ESTRATEGIA SISTEMICA E INTEGRACION DE ESFUERZOS INTERINSTITUCIONALES EN LA PROVIDENCIA PARA LA RECUPERACIÓN Y PROTECCIÓN DEL HIDROSISTEMA DEL RÍO BOGOTÁ**

| INTEGRACIÓN DE ESFUERZOS COMUNES | SOLUCIÓN PROVISIONAL INMEDIATA                                    | SOLUCIÓN DEFINITIVA (PROYECTO DE LEY) |
|----------------------------------|-------------------------------------------------------------------|---------------------------------------|
|                                  | -Constituir temporalmente el Observatorio Regional Ambiental y de | Creación del                          |

Expediente No. 25000-23-27-000-2001-0479-01  
Acumulados Nos. 2000-0428, 2001-0122, 2001-0343  
Actor: GUSTAVO MOYA ÁNGEL Y OTROS  
Acción Popular

|                                                       |                                                                                                                                                                                                                                                                                                                                                                                                                                                                                                                                                                                                                                                                                                                                             |                                                                                                                                                                                           |
|-------------------------------------------------------|---------------------------------------------------------------------------------------------------------------------------------------------------------------------------------------------------------------------------------------------------------------------------------------------------------------------------------------------------------------------------------------------------------------------------------------------------------------------------------------------------------------------------------------------------------------------------------------------------------------------------------------------------------------------------------------------------------------------------------------------|-------------------------------------------------------------------------------------------------------------------------------------------------------------------------------------------|
| REFORZAMIENTO DEL SISTEMA DE INFORMACIÓN DE LA CUENCA | <p>Desarrollo Sostenible del Río Bogotá - ORARBO-. Actualmente existe el Observatorio Distrital.</p> <p>- Constituir en forma temporal el Sistema de Información Ambiental</p> <p>-SIGICA Río Bogotá-</p> <p>Realización de inventarios:</p> <ul style="list-style-type: none"><li>- de las áreas de manejo del Decreto 2811 de 1974 (Páramos, subpáramos, nacimientos de agua y zonas de recarga de acuíferos)</li><li>- zonas donde se requiere iniciar procesos de reforestación protectora</li><li>- identificación y priorización de áreas de importancia estratégica</li><li>- Aéreas excluidas de la Minería</li><li>- de Pasivos Ambientales Mineros -PAM-</li><li>- los humedales y zonas de amortiguación de crecientes</li></ul> | SISTEMA REGIONAL COMÚN DE INFORMACIÓN AMBIENTAL para tomar todas las decisiones interinstitucionales para toda la Cuenca (Proyecto de Ley que presentara el Ministerio de medio Ambiente) |
|-------------------------------------------------------|---------------------------------------------------------------------------------------------------------------------------------------------------------------------------------------------------------------------------------------------------------------------------------------------------------------------------------------------------------------------------------------------------------------------------------------------------------------------------------------------------------------------------------------------------------------------------------------------------------------------------------------------------------------------------------------------------------------------------------------------|-------------------------------------------------------------------------------------------------------------------------------------------------------------------------------------------|

Expediente No. 25000-23-27-000-2001-0479-01  
Acumulados Nos. 2000-0428, 2001-0122, 2001-0343  
Actor: GUSTAVO MOYA ÁNGEL Y OTROS  
Acción Popular

|                                                             |                                                                                                                                                                                                                                                                                                                                                                                                                                                                                                                                                 |                                                                                                                                                                                                    |
|-------------------------------------------------------------|-------------------------------------------------------------------------------------------------------------------------------------------------------------------------------------------------------------------------------------------------------------------------------------------------------------------------------------------------------------------------------------------------------------------------------------------------------------------------------------------------------------------------------------------------|----------------------------------------------------------------------------------------------------------------------------------------------------------------------------------------------------|
|                                                             | <p>- Se Ordena LA REALIZACIÓN DE UN CENSO DE LAS PERSONAS Y/O EMPRESAS QUE REALICEN ACTIVIDADES INDUSTRIALES DE CURTIEMBRES</p>                                                                                                                                                                                                                                                                                                                                                                                                                 |                                                                                                                                                                                                    |
| <p>REFORZAMIENTO DEL SISTEMA DE PLANEACIÓN DE LA CUENCA</p> | <p>- SE ORDENA A LA CAR ACTUALIZAR EN FORMA INMEDIATA EL POMCA (PLAN DE ORDENACIÓN Y MANEJO DE LA CUENCA DEL RIO BOGOTÁ) y hacer la articulación con los Instrumentos de Planeación existentes. ADEMÁS SE LE ORDENA QUE ASESORE AL DISTRITO CAPITAL Y A LOS ENTES TERRITORIALES AFERENTES DEL RIO BOGOTÁ, EN EL ACTUAL PROCESO DE MODIFICACIÓN DE LOS <u>POTS, PBOT Y EOT</u>, ASÍ COMO EN SU ARTICULACIÓN CON EL POMCA.</p> <p>- Se Ordena al Distrito Capital y a los entes territoriales AFERENTES DEL Río Bogotá, AJUSTAR LOS PLANES DE</p> | <p>Creación del SISTEMA REGIONAL COMÚN DE PLANEACIÓN para tomar todas las decisiones interinstitucionales para toda la Cuenca (Proyecto de Ley que presentara el Ministerio de Medio Ambiente)</p> |

Expediente No. 25000-23-27-000-2001-0479-01  
Acumulados Nos. 2000-0428, 2001-0122, 2001-0343  
Actor: GUSTAVO MOYA ÁNGEL Y OTROS  
Acción Popular

|  |                                                                                                                                                                                                                                                                                                                                                                                                                                                                                                                                                                                                                                                 |  |
|--|-------------------------------------------------------------------------------------------------------------------------------------------------------------------------------------------------------------------------------------------------------------------------------------------------------------------------------------------------------------------------------------------------------------------------------------------------------------------------------------------------------------------------------------------------------------------------------------------------------------------------------------------------|--|
|  | <p><b>GESTION INTEGRADA<br/>DE RESIDUOS<br/>SÓLIDOS -PGIRS-</b></p> <p>- Ordenar al Distrito y a la empresa de Acueducto el elaborar en seis meses el Plan para identificación y corrección DE LAS CONEXIONES ERRADAS DEL SISTEMA SANITARIO AL SISTEMA PLUVIAL DE LA CIUDAD</p> <p>- Ordenar al Distrito y a la empresa de Acueducto el elaborar en seis meses el Plan para rehabilitación de redes.</p> <p>Se Ordena que se realicen, revisen o ajusten los Planes Maestros de Acueducto y Alcantarillado</p> <p>- Se solicite por el Minambiente LA INSCRIPCIÓN DE LA LIMITACIÓN DE DOMINIO EN EL FOLIO DE MATRICULA INMOBILIARIA PREDIAL</p> |  |
|--|-------------------------------------------------------------------------------------------------------------------------------------------------------------------------------------------------------------------------------------------------------------------------------------------------------------------------------------------------------------------------------------------------------------------------------------------------------------------------------------------------------------------------------------------------------------------------------------------------------------------------------------------------|--|

Expediente No. 25000-23-27-000-2001-0479-01  
Acumulados Nos. 2000-0428, 2001-0122, 2001-0343  
Actor: GUSTAVO MOYA ÁNGEL Y OTROS  
Acción Popular

|                                                               |                                                                                                                                                                                                                                                                                                                                                                                                                      |                                                                                                                       |
|---------------------------------------------------------------|----------------------------------------------------------------------------------------------------------------------------------------------------------------------------------------------------------------------------------------------------------------------------------------------------------------------------------------------------------------------------------------------------------------------|-----------------------------------------------------------------------------------------------------------------------|
|                                                               | <div>- Se cree en 24 meses por el CECH un SISTEMA DE EVALUACIÓN DEL RIESGO Y DE VALORACIÓN DEL DAÑO AMBIENTAL</div> <div>- Implementación del SISTEMA DE AUDITORIA AMBIENTAL dentro de los doce meses siguientes a los 24 anteriores.</div>                                                                                                                                                                          |                                                                                                                       |
| REFORZAMIENTO DE LA GESTION Y COORDINACION INTERINSTITUCIONAL | <div>CONSTITUCIÓN PROVISIONAL DEL CONSEJO ESTRATÉGICO DE CUENCA, QUE SE CONVERTIRÁ EN UNA GERENCIA ESTRATÉGICA DE CUENCA mediante proyecto de Ley, que deberá presentar el Ministerio de Medio Ambiente.</div> <div>- Se Ordena la ARTICULACIÓN EN CABEZA DE LA CAR con todos los proyectos de adecuación hidráulica y recuperación ambiental del Rio Bogotá; con el Plan de Gestión Ambiental 2008-2038 de la</div> | Creación de la <u>GERENCIA ESTRATÉGICA DE CUENCA</u> (Proyecto de Ley que presentara el Ministerio de medio Ambiente) |

Expediente No. 25000-23-27-000-2001-0479-01  
Acumulados Nos. 2000-0428, 2001-0122, 2001-0343  
Actor: GUSTAVO MOYA ÁNGEL Y OTROS  
Acción Popular

|                                                                         |                                                                                                                                                                                                                                                                                                                                                                                                                                                                                                                                            |                                                                                                                                                                                                                                                                         |
|-------------------------------------------------------------------------|--------------------------------------------------------------------------------------------------------------------------------------------------------------------------------------------------------------------------------------------------------------------------------------------------------------------------------------------------------------------------------------------------------------------------------------------------------------------------------------------------------------------------------------------|-------------------------------------------------------------------------------------------------------------------------------------------------------------------------------------------------------------------------------------------------------------------------|
|                                                                         | <p><u>Secretaria</u><br/><u>Distrital</u> de<br/><u>Ambiente,</u> el<br/><u>Plan</u><br/><u>Departamental</u> de<br/><u>Aguas PDA</u> de la<br/><u>Gobernación</u> de<br/><u>Cundinamarca,</u><br/><u>las Evaluaciones</u><br/><u>del Agua ERA</u> del<br/><u>IDEAM,</u> y <u>los</u><br/><u>demás</u><br/><u>instrumentos</u><br/><u>normativos</u> para<br/><u>la gestión</u><br/><u>integral</u> de la<br/><u>Cuenca</u><br/><u>Hidrográfica.</u></p> <p><b>SE CONSTITUYEN 3<br/>CONSEJOS DE<br/>CUENCA: ALTA,<br/>MEDIA Y BAJA</b></p> |                                                                                                                                                                                                                                                                         |
| <p><b>REFORZAMIENTO DE<br/>LA FINANCIACION<br/>COMO INSTRUMENTO</b></p> | <p>- Constitució<br/>n temporal del<br/><b>FONDO COMUN DE<br/>COFINANCIAMIENTO<br/>-FOCOF-.</b> YA LA<br/>CAR TIENE A SU<br/>CARGO EL <b>FONDO DE<br/>INVERSIONES PARA<br/>LA ADECUACIÓN DEL<br/>RIO BOGOTÁ -FIAB-</b><br/>CREADO POR EL<br/>ACUERDO NRO 28 DE<br/>2005 Y MODIFICADO<br/>POR EL ACUERDO<br/>NRO 15 DE 19 DE<br/>JUNIO DE 2007,<br/>CUYAS INVERSIONES<br/>DEBEN ESTAR<br/>CONTEMPLADAS EN<br/>EL <b>POMCA.</b></p> <p>- Se Ordena<br/>en forma</p>                                                                          | <p><b>Integración de<br/>Recursos<br/>Interinstituciona<br/>les para<br/>desarrollar la<br/>Estrategia<br/>Interinstituciona<br/>l en beneficio<br/>del Rio (FIAB +<br/>FOCOF) (Proyecto<br/>de Ley que<br/>presentara el<br/>Ministerio de<br/>medio Ambiente)</b></p> |

Expediente No. 25000-23-27-000-2001-0479-01  
Acumulados Nos. 2000-0428, 2001-0122, 2001-0343  
Actor: GUSTAVO MOYA ÁNGEL Y OTROS  
Acción Popular

|                            |                                                                                                                                                                                                                                                                                                                                                  |                                                                                   |
|----------------------------|--------------------------------------------------------------------------------------------------------------------------------------------------------------------------------------------------------------------------------------------------------------------------------------------------------------------------------------------------|-----------------------------------------------------------------------------------|
|                            | <p>inmediata al Gobierno Nacional un estudio sobre la efectividad de impuestos, tasas, contribuciones, y demás gravámenes existentes para la protección del ambiente.</p> <p>- Se Ordena en 9 meses modificar los parámetros de los instrumentos económicos: Tasas retributivas, compensatorias y de utilización de aguas.</p>                   |                                                                                   |
| <p>OBRAS DE INGENIERIA</p> | <p>- Ampliación de la actual PTAR Salitre en caudal y capacidad de tratamiento</p> <p>- Construcción de la PTAR Canoas, 2da Planta de Tratamiento. (secundario CON Desinfección) Construcción de la estación Elevadora para la Generación de Energía</p> <p>- Construcción cofinanciada en tres años del Parque Ecoeficiente Industrial para</p> | <p>OPERACIÓN Y MANTENIMIENTO A PARTIR DE 2018 OBTENGA LA CONCESION DE ENERGIA</p> |

Expediente No. 25000-23-27-000-2001-0479-01  
Acumulados Nos. 2000-0428, 2001-0122, 2001-0343  
Actor: GUSTAVO MOYA ÁNGEL Y OTROS  
Acción Popular

|                           |                                                                                                                                                                                                                                                                                                                                                                                                    |  |
|---------------------------|----------------------------------------------------------------------------------------------------------------------------------------------------------------------------------------------------------------------------------------------------------------------------------------------------------------------------------------------------------------------------------------------------|--|
|                           | <p>las curtimbres de Villapinzón y Chocontá con el propósito de tratar las aguas residuales, y asistencia técnica para cumplir con normas de vertimientos.</p> <p>- Construcción cofinanciada en tres años del Parque Ecoeficiente Industrial para las curtimbres de San Benito con el propósito de tratar las aguas residuales, y asistencia técnica para cumplir con normas de vertimientos.</p> |  |
| EDUCACION E INVESTIGACION | <p>Se Ordena al Consejo estratégico de la Cuenca que en seis meses comience LA CAPACITACIÓN DIRIGIDA A LAS AUTORIDADES DE LA CUENCA PARA SENSIBILIZAR Y ACTUALIZAR A LOS FUNCIONARIOS EN LAS NORMAS, MANEJO Y PROTECCIÓN DE LA FLORA Y LA FAUNA SILVESTRE, LOS</p>                                                                                                                                 |  |

Expediente No. 25000-23-27-000-2001-0479-01  
Acumulados Nos. 2000-0428, 2001-0122, 2001-0343  
Actor: GUSTAVO MOYA ÁNGEL Y OTROS  
Acción Popular

|  |                                                                                                                                                                                                                                                                                                                                                                                                                                                                                                                                                                                                                                                               |  |
|--|---------------------------------------------------------------------------------------------------------------------------------------------------------------------------------------------------------------------------------------------------------------------------------------------------------------------------------------------------------------------------------------------------------------------------------------------------------------------------------------------------------------------------------------------------------------------------------------------------------------------------------------------------------------|--|
|  | <p>ECOSISTEMAS EN GENERAL Y EL SISTEMA DE GESTION INTEGRAL DE LA CUENCA DEL RIO BOGOTA.</p> <p>Se Ordena al Consejo estratégico de la Cuenca, mientras se crea la Gerencia de Cuenca con el apoyo del Ministerio de Educacion y del Departamento de Cundinamarca que comience LA CAPACITACIÓN DIRIGIDA A LOS HABITANTES DE LAS AREAS QUE INTEGRAN LA CUENCA HIDROGRAFICA EN EL MANEJO DE RESIDUOS SOLIDOS.</p> <p>Se Ordena al Ministerio de Ambiente y a Colciencias <b>priorizar líneas de investigación</b></p> <p>Se Ordena al Ministerio de Educación Nacional <b>incluir en los Proyectos Ambientales Escolares PRAES el capitulo del reciclaje</b></p> |  |
|--|---------------------------------------------------------------------------------------------------------------------------------------------------------------------------------------------------------------------------------------------------------------------------------------------------------------------------------------------------------------------------------------------------------------------------------------------------------------------------------------------------------------------------------------------------------------------------------------------------------------------------------------------------------------|--|

Expediente No. 25000-23-27-000-2001-0479-01  
Acumulados Nos. 2000-0428, 2001-0122, 2001-0343  
Actor: GUSTAVO MOYA ÁNGEL Y OTROS  
Acción Popular

|  |                                                                                                                                                                                                                                                                                                                                                                                                                                                                                            |  |
|--|--------------------------------------------------------------------------------------------------------------------------------------------------------------------------------------------------------------------------------------------------------------------------------------------------------------------------------------------------------------------------------------------------------------------------------------------------------------------------------------------|--|
|  | <p>Promover programas para aprender el uso eficiente y el ahorro del agua como elemento integrante y preponderante para la preservación y conservación de los procesos hidrológicos, ecosistémicos y de biodiversidad.</p> <p>- Se ordena al SENA y al Ministerio del Trabajo capacitar y reubicar laboralmente las personas que dejen la actividad de las curtiembres</p> <p>Se Ordena incorporar el Programa Nacional de Producción mas Limpia en el sector productivo de la Región.</p> |  |
|--|--------------------------------------------------------------------------------------------------------------------------------------------------------------------------------------------------------------------------------------------------------------------------------------------------------------------------------------------------------------------------------------------------------------------------------------------------------------------------------------------|--|

En mérito de lo expuesto, el Consejo de Estado, Sala de lo Contencioso Administrativo, Sección Primera, administrando justicia en nombre de la República y por autoridad de la Ley,

Expediente No. 25000-23-27-000-2001-0479-01  
Acumulados Nos. 2000-0428, 2001-0122, 2001-0343  
Actor: GUSTAVO MOYA ÁNGEL Y OTROS  
Acción Popular

**F A L L A :**

**PRIMERO: MODIFÍCASE** el numeral segundo de la sentencia proferida por el Tribunal Administrativo de Cundinamarca - Sección Cuarta, Subsección "B", en su lugar, **AMPÁRANSE** los derechos colectivos relacionados con el agua, el goce de un ambiente sano, la existencia del equilibrio ecológico y el manejo y aprovechamiento racional de los recursos naturales para garantizar su desarrollo sostenible, su conservación, restauración o sustitución, la conservación de las especies animales y vegetales, la protección de áreas de especial importancia ecológica, de los ecosistemas situados en las zonas fronterizas, así como los demás intereses de la comunidad relacionados con la preservación y restauración del medio ambiente; el goce del espacio público y la utilización y defensa de los bienes de uso público; la defensa del patrimonio público; la defensa del patrimonio cultural de la Nación; la seguridad y salubridad públicas; el acceso a una infraestructura de servicios que garantice la salubridad pública; el acceso a los servicios públicos y a que su prestación sea eficiente y oportuna; el derecho a la seguridad y prevención de desastres previsibles técnicamente; el acceso a los servicios públicos y a que su prestación sea eficiente y oportuna; los derechos de los consumidores y usuarios, dentro de los procesos acumulados incoados por los señores GUSTAVO MOYA ÁNGEL (sustituido por Sara Mariela Parraga en calidad de sucesora procesal), MIGUEL ÁNGEL CHAVES GARCÍA, JORGE HUMBERTO GONZÁLEZ VILLANUEVA, NICOLÁS ROA y JORGE

Expediente No. 25000-23-27-000-2001-0479-01  
Acumulados Nos. 2000-0428, 2001-0122, 2001-0343  
Actor: GUSTAVO MOYA ÁNGEL Y OTROS  
Acción Popular

ENRIQUE CUERVO RAMÍREZ, de acuerdo con las razones expuestas en la parte motiva de esta providencia.

**SEGUNDO: CONFÍRMANSE** los numerales primero y noveno de la sentencia de instancia en cuanto el primero dispuso desestimar las excepciones de mérito propuestas por los demandados y, el segundo absolvió a la COMISIÓN REGULADORA DE AGUA POTABLE, al INSTITUTO GEOGRÁFICO AGUSTÍN CODAZZI, a la SUPERINTENDENCIA DE SERVICIOS PÚBLICOS DOMICILIARIOS, así como a la SOCIEDAD BOGOTANA DE AGUAS SUEZ LYONNAISE DES EAUX DEGREMONT E.S.P. S.A, por las razones allí expuestas. De otro lado, **MODIFÍCASE** en lo atinente a la declaratoria de responsabilidad, la cual quedará así:

*"DECLÁRENSE responsables de la CATÁSTROFE AMBIENTAL, ECOLÓGICA Y ECONÓMICO-SOCIAL DE LA CUENCA HIDROGRÁFICA DEL RÍO BOGOTA y DE LA CONTAMINACIÓN DE LOS RÍOS Y QUEBRADAS AFLUENTES DEL PRIMERO Y DE QUE DAN CUENTA LAS DEMANDAS, POR ACCIÓN A TODOS LOS HABITANTES E INDUSTRIAS DE LA CUENCA QUE DESDE HACE NO MENOS DE TREINTA AÑOS HAN VENIDO REALIZANDO SUS VERTIMIENTOS DOMÉSTICOS E INDUSTRIALES, además de las malas prácticas agropecuarias y de disposición de residuos sólidos, entre otras, todos ellos como actores difusos, POR OMISIÓN a la NACIÓN - MINISTERIO DE MINAS Y ENERGÍA - MINISTERIO DE AMBIENTE Y DESARROLLO SOSTENIBLE, MINISTERIO VIVIENDA, CIUDAD Y TERRITORIO, MINISTERIO DE SALUD Y PROTECCIÓN SOCIAL, MINISTERIO DEL TRABAJO, MINISTERIO DE AGRICULTURA Y DESARROLLO RURAL, a la CORPORACIÓN AUTÓNOMA REGIONAL DE CUNDINAMARCA, - CAR, al DEPARTAMENTO DE CUNDINAMARCA, al DISTRITO CAPITAL DE BOGOTÁ, y todos los MUNICIPIOS aferentes a la cuenca".*

Expediente No. 25000-23-27-000-2001-0479-01  
Acumulados Nos. 2000-0428, 2001-0122, 2001-0343  
Actor: GUSTAVO MOYA ÁNGEL Y OTROS  
Acción Popular

**TERCERO:** En lo relacionado con los recursos de apelación interpuestos contra la decisión de instancia, se dispone:

**DEL MINISTERIO DE EDUCACIÓN NACIONAL**

**REVÓCASE** el literal k) del numeral 3º de la sentencia de primera instancia en lo atinente a la inclusión de los Proyectos Ambientales Escolares-PRAES en la educación primaria, y media y tecnológica y superior, como cátedra obligatoria, por su naturaleza de proyecto transversal de la educación.

**CONFÍRMASE** el literal q) del numeral 3º de la sentencia de primera instancia.

**DEL MINISTERIO DE AGRICULTURA Y DESARROLLO RURAL**

**REVÓCASE** el numeral 1º y el literal f) del numeral 3º de la parte resolutive de la sentencia de primera instancia, en lo atinente a la responsabilidad endilgada por omisión en el control de vertimientos de aguas residuales en cuanto no es competencia del Ministerio de Agricultura ejercer vigilancia sobre los vertimientos, ni tampoco imponer sanciones a los infractores de las normas ambientales.

**CONFÍRMASE** el literal q) del numeral 3º de la parte resolutive de la sentencia de primera instancia, en cuanto el Ministerio de Agricultura

Expediente No. 25000-23-27-000-2001-0479-01  
Acumulados Nos. 2000-0428, 2001-0122, 2001-0343  
Actor: GUSTAVO MOYA ÁNGEL Y OTROS  
Acción Popular

y Desarrollo Rural debe planear y ejecutar coordinadamente con el Ministerio de Ambiente y Desarrollo Sostenible los mecanismos que deben adoptarse para evitar los asentamientos humanos en las zonas de ronda, así como las medidas a que haya lugar, dentro de los lineamientos de las políticas que compete formular a dicho Ministerio.

**DEL MINISTERIO DE AMBIENTE, VIVIENDA Y DESARROLLO TERRITORIAL (hoy Ministerio de Ambiente y Desarrollo sostenible).**

**REVÓCASE** el numeral 1º y el literal f) del numeral 3º de la parte resolutive de la sentencia de primera instancia, en lo atinente a la responsabilidad endilgada al Ministerio de Ambiente y Desarrollo Sostenible por omisión en el control de vertimientos de aguas residuales.

**CONFÍRMASE** el artículo 3º, literal b) de la sentencia de primera instancia, en cuanto decidió que en el término máximo de tres (3) meses el Ministerio de Ambiente debía proceder a la delimitación geográfica de las zonas excluidas de la minería, *esto es, dónde no podrán ejecutarse trabajos y obras de exploración y explotación minera, según la previsión del artículo 34 de la Ley 685 de 2001 o "Código de Minas" y bajo las directrices señaladas por la Corte Constitucional en la sentencia C-339 de 2002.*

Expediente No. 25000-23-27-000-2001-0479-01  
Acumulados Nos. 2000-0428, 2001-0122, 2001-0343  
Actor: GUSTAVO MOYA ÁNGEL Y OTROS  
Acción Popular

**CONFÍRMASE** el numeral 3º literal c) de la sentencia de primera instancia en cuanto el Ministerio de Ambiente y Desarrollo Sostenible es competente para revocar y suspender los títulos, permisos, concesiones y licencias de las exploraciones mineras en las zonas de exclusión.

**REVÓCASE** el literal h) del numeral cuarto de la sentencia de primera instancia en cuanto la competencia para el dragado del río Bogotá corresponde a la CAR y no al Ministerio de Ambiente Vivienda y Desarrollo Territorial.

**CONFÍRMASE** la decisión de instancia de acumular los diferentes procesos que tenían relación con este tema y que podían resolverse bajo una misma cuerda procesal.

**NIÉGASE** por improcedente la nulidad alegada por el Ministerio de Ambiente por indebida vinculación a la acción popular, acorde con los fundamentos expuestos en la sentencia.

**DEL MINISTERIO DE COMERCIO, INDUSTRIA Y TURISMO**

**NIÉGASE** por improcedente la excepción de falta de legitimación en la causa por pasiva alegada por este Ministerio de Comercio, Industria y Turismo, por cuanto en la sentencia de instancia no fue condenado y simplemente fue conminado dentro del ámbito de su competencia.

Expediente No. 25000-23-27-000-2001-0479-01  
Acumulados Nos. 2000-0428, 2001-0122, 2001-0343  
Actor: GUSTAVO MOYA ÁNGEL Y OTROS  
Acción Popular

**DEL MINISTERIO DE HACIENDA Y CRÉDITO PÚBLICO**

**CONFÍRMASE** el numeral 3º literal v) de la parte resolutive de la sentencia de primera instancia, por las razones expuestas en la sentencia.

**DEL MINISTERIO DE MINAS Y ENERGÍA**

**REVÓCASE** el numeral 1º y el literal f) del numeral 3º de la parte resolutive de la sentencia de primera instancia, en lo atinente a la responsabilidad endilgada al Ministerio de Minas y Energía por omisión en el control de vertimientos de aguas residuales, por lo expuesto en la motiva de este proveído.

**CONFÍRMASE** el numeral 3º literales b) y d) de la sentencia de primera instancia en cuanto aún no se ha expedido el acto administrativo en virtud del cual se establecen las zonas de exclusión minera en la Cuenca del Río Bogotá.

**CONFÍRMASE** el numeral 3º literal e) de la sentencia de primera instancia en cuanto el Ministerio de Minas y Energía debe apoyar o prestar su concurso para la reubicación de las familias que se encuentran lavando arena en el río Tunjuelo, dentro del ámbito de su competencia.

**REVÓCASE** el numeral 3º literales h), ñ) y q) de la sentencia de primera instancia en cuanto la orden impartida no se ajusta a las competencias propias

Expediente No. 25000-23-27-000-2001-0479-01  
Acumulados Nos. 2000-0428, 2001-0122, 2001-0343  
Actor: GUSTAVO MOYA ÁNGEL Y OTROS  
Acción Popular

del Ministerio de Minas y Energía para financiar los proyectos por escorrentía y sedimentación del río y sus afluentes.

**DEL FONDO NACIONAL DE REGALÍAS**

**CONFÍRMASE** el numeral 3º, literal v), de la sentencia por las razones expuestas en la sentencia.

**DEL DEPARTAMENTO NACIONAL DE PLANEACIÓN**

**CONFÍRMASE** el numeral 3º, literal x), por los motivos expuestos en la providencia.

**CONFÍRMASE** el numeral 5º de la parte resolutive de la sentencia, relativo al aval y pago de créditos por parte de la Nación del crédito de la Empresa de Acueducto y Alcantarillado de Bogotá, por los motivos expuestos en la sentencia.

**DE LA ASOCIACIÓN DE CURTIDORES DE VILLAPINZÓN-ACURTIR**

**CONFÍRMASE** el literal 11) del numeral 3º de la sentencia de primera instancia por los motivos previstos en esta sentencia.

**DE LA COMPAÑÍA BOGOTANA DE AGUAS Y SANEAMIENTO  
SUEZ LYONNAISE DES EAUX DEGREMONT E.S.P. S.A. -  
BAS-**

Expediente No. 25000-23-27-000-2001-0479-01  
Acumulados Nos. 2000-0428, 2001-0122, 2001-0343  
Actor: GUSTAVO MOYA ÁNGEL Y OTROS  
Acción Popular

**CONFÍRMASE** el numeral 9° de la sentencia de primera instancia en cuanto dispuso compulsar copias para que se investiguen las conductas desplegadas en ejecución del contrato 015 de 1994 y que pudieron dar lugar a un detrimento patrimonial por las razones expuestas en este proveído.

**DE LA EMPRESA DE ACUEDUCTO Y ALCANTARILLADO DE BOGOTÁ - E.A.A.B. E.S.P.**

**REVÓCASE** el numeral 5° de la sentencia de primera instancia en lo relativo al plazo de la construcción de la PTAR Canoas en los términos de la presente decisión.

**DE LA CORPORACIÓN AUTÓNOMA REGIONAL DE CUNDINAMARCA - CAR -**

**CONFÍRMASE** el numeral 3° literal e) de la sentencia de primera instancia por los motivos expuestos en la sentencia.

**CONFÍRMASE** el numeral 5° literales c) y d) de la sentencia de primera instancia en los términos de la presente decisión relativos a la solución técnica.

**CONFÍRMASE** el numeral 4° literal h) de la sentencia de primera instancia en los términos de la presente decisión.

Expediente No. 25000-23-27-000-2001-0479-01  
Acumulados Nos. 2000-0428, 2001-0122, 2001-0343  
Actor: GUSTAVO MOYA ÁNGEL Y OTROS  
Acción Popular

**Finalmente** y en lo atinente a los motivos de alzada comunes se dispone:

**DECLÁRASE** que los acuerdos logrados entre las partes o intervinientes en este proceso con el aval del Tribunal Administrativo de Cundinamarca, no son "*Pactos de Cumplimiento*"; **REVÓCASE** el numeral 11 en cuanto decidió reconocer y pagar el incentivo económico, en su lugar, **NIÉGUESE** por las razones expuestas en la parte motiva de esta providencia; **CONFÍRMASE** la sentencia de primera instancia en cuanto negó las demás indemnizaciones; **CONFÍRMASE** el numeral 1º de la sentencia complementaria que dispuso condenar en costas a favor de los accionantes, las cuales se liquidaran en su oportunidad y con cargo a las entidades declaradas responsables en este proveído por partes iguales.

**CUARTO: MODIFÍQUESE** en lo demás la sentencia de instancia de acuerdo con las razones expuestas en la parte motiva de esta providencia. En consecuencia, **ADÓPTASE** la decisión acorde con las consideraciones de este proveído en los siguientes términos:

**4.1. ORDÉNASE** al Gobierno Nacional - Ministerio de Ambiente y Desarrollo Sostenible que en el término perentorio e improrrogable de seis (6) meses contados a partir de la ejecutoria de la sentencia, presente el correspondiente proyecto de ley de creación de la *Gerencia de la Cuenca Hidrográfica del Río Bogotá* - GCH - y del *Fondo*

Expediente No. 25000-23-27-000-2001-0479-01  
Acumulados Nos. 2000-0428, 2001-0122, 2001-0343  
Actor: GUSTAVO MOYA ÁNGEL Y OTROS  
Acción Popular

*Común de Cofinanciamiento - FOCOF -*, de acuerdo con la parte motiva de esta providencia, este hecho lo deberá acreditar y comunicar al juez de instancia so pena de incurrir en desacato a orden judicial.

- 4.2. CONSTITÚYASE** el *Consejo Estratégico* de la *Cuenca Hidrográfica del Río Bogotá - CECH -* y el *Fondo Común de Cofinanciamiento - FOCOF -* de manera transitoria y hasta tanto se expida la correspondiente ley de creación de la *Gerencia de la Cuenca Hidrográfica del Río Bogotá - GCH -* y del citado Fondo de acuerdo con el numeral anterior.

El propósito del Consejo radica en dirigir, gestionar, articular, integrar y coordinar con un enfoque sistémico la cuenca hidrográfica del Río Bogotá, el cual estará conformado por el Ministerio de Ambiente y Desarrollo Sostenible, el Departamento de Cundinamarca, el Distrito Capital - Secretaría Distrital de Ambiente - Empresa de Acueducto y Alcantarillado de Bogotá E.A.A.B. -, la Corporación Autónoma Regional de Cundinamarca - CAR y dos (2) representantes de los entes territoriales aferentes a la cuenca, quienes establecerán por mayoría simple su reglamento de funcionamiento y de toma de decisiones. Hasta tanto se cree la *Gerencia de la Cuenca Hidrográfica del Río Bogotá - GCH* participarán en calidad de intervinientes el Contralor General de la República o su delegado y el Procurador General

Expediente No. 25000-23-27-000-2001-0479-01  
Acumulados Nos. 2000-0428, 2001-0122, 2001-0343  
Actor: GUSTAVO MOYA ÁNGEL Y OTROS  
Acción Popular

de la Nación o su delegado, acorde con las razones expuestas en la parte motiva de esta providencia.

El fondo se integrará con los recursos necesarios para la formulación, estructuración, desarrollo, implementación, ejecución y puesta en marcha de las estrategias, planes, programas, proyectos y, en general, todas las actividades que sean priorizadas por el *Consejo Estratégico de la Cuenca Hidrográfica del Río Bogotá - CECH* - y posteriormente por la *Gerencia de la Cuenca Hidrográfica del Río Bogotá - GCH* - en el marco del POMCA. Se podrá constituir como fondo financiero administrado por una fiduciaría. La CECH y la GCH podrán exigir a la sociedad fiduciaria cuentas comprobadas de su gestión. También podrán revocar el contrato en cualquier momento o solicitar la remoción de la sociedad fiduciaria cuando haya causa justificada y nombrar otra en su reemplazo. El Consejo y la Gerencia podrán solicitar al término del fideicomiso la devolución de los recursos entregados a la fiduciaria que no hayan sido ejecutados, descontando los respectivos gastos de administración. El contrato se realizará entre el Consejo y/o la Gerencia (fideicomitente) y una sociedad fiduciaria que será escogida mediante licitación o concurso, en cumplimiento del artículo 30 de la Ley 80 de 1993 y sus modificaciones.

**ORDÉNASE** al Ministerio de Ambiente y Desarrollo Sostenible que de manera inmediata coordine y

Expediente No. 25000-23-27-000-2001-0479-01  
Acumulados Nos. 2000-0428, 2001-0122, 2001-0343  
Actor: GUSTAVO MOYA ÁNGEL Y OTROS  
Acción Popular

lidere la implementación del *Consejo Estratégico de la Cuenca Hidrográfica del Río Bogotá - CECH-* y la *constitución del Fondo Común de Cofinanciamiento - FOCOF -*, y realice de manera permanente su Secretaría Técnica, este hecho lo deberá acreditar y comunicar al juez de instancia so pena de incurrir en desacato a orden judicial.

**4.3. DECLÁRASE** que el *Consejo Estratégico de la Cuenca Hidrográfica del Río Bogotá - CECH -* tendrá, entre otras, las siguientes funciones:

- - Coordinar, cooperar y gestionar con los entes territoriales y las autoridades ambientales la implementación y seguimiento de la Política Ambiental.
- - Incrementar los mecanismos de coordinación y cooperación interinstitucional e intersectorial, y evaluar periódicamente su gestión permitiendo el fortalecimiento de las instituciones encargadas de la gestión ambiental.
- - Establecer directrices y procedimientos para la articulación de acciones entre las Corporaciones Autónomas Regionales y las entidades territoriales, para el manejo y financiación de proyectos comunes.
- - Desarrollar acciones para la articulación entre las Autoridades del orden Nacional, Regional Departamental, Distrital y Municipal.

Expediente No. 25000-23-27-000-2001-0479-01  
Acumulados Nos. 2000-0428, 2001-0122, 2001-0343  
Actor: GUSTAVO MOYA ÁNGEL Y OTROS  
Acción Popular

- - Desarrollar acciones de articulación y coordinación para la planificación ambiental territorial entre las diferentes instituciones con competencia en el tema.

- - Establecer directrices e implementar programas para la cooperación regional entre las autoridades ambientales y los entes territoriales para la formulación, estructuración, desarrollo, ejecución y puesta en marcha de las estrategias, planes, programas, proyectos y, en general, todas las actividades necesarias para la gestión integral de la cuenca hidrográfica del Río Bogotá.

- - Dirimir las diferentes problemáticas del orden técnico, administrativo y financiero en torno al recurso hídrico en la cuenca hidrográfica del Río Bogotá.

- - Realizar el monitoreo, evaluación y seguimiento a la gestión adelantada de manera integral para la recuperación y sostenibilidad de la cuenca del Río Bogotá.

Una vez creada la *Gerencia de la Cuenca Hidrográfica del Río Bogotá - GCH* - ésta deberá asumir las funciones del *Consejo Estratégico de la Cuenca Hidrográfica del Río Bogotá - CECH* - de acuerdo con lo dispuesto en esta decisión.

Expediente No. 25000-23-27-000-2001-0479-01  
Acumulados Nos. 2000-0428, 2001-0122, 2001-0343  
Actor: GUSTAVO MOYA ÁNGEL Y OTROS  
Acción Popular

4.4. Mientras se crea la *Gerencia de la Cuenca Hidrográfica del Río Bogotá - GCH - el Fondo Común de Cofinanciamiento - FOCOF -*, según criterio del *Consejo Estratégico de la Cuenca Hidrográfica del Río Bogotá - CECH -* y acorde con el ordenamiento jurídico, podrá integrarse con los siguientes recursos:

- Los recursos provenientes del Sistema General de participaciones -SGP - Ley 1176 de 2007, artículo 6°, numeral 2° y parágrafo: 100% de la participación de Bogotá en la distribución del SGP sectorial para departamentos.
- Los recursos provenientes del Sistema General de Participaciones de Bogotá en la distribución del SGP sectorial como municipio entre los años 2011 y 2040, cuando exista saldo positivo entre los recursos asignados y el valor del déficit entre subsidios y aportes solidarios.
- Los recursos provenientes del Fondo Nacional de Regalías: 2.46% (Ley 756/02).
- Los recursos provenientes del Impuesto Predial, transferencia hecha por la CAR al Distrito Capital, acorde con el parágrafo 2° del artículo 44 de la Ley 99 de 1993.
- Los recursos provenientes de las tasas retributivas (artículo 66 Ley 99 de 1993).
- Los recursos provenientes del 7.5% del predial (artículo 44 Ley 99 de 1993) y sus rendimientos.
- Los recursos provenientes de la Banca Multilateral.

Expediente No. 25000-23-27-000-2001-0479-01  
Acumulados Nos. 2000-0428, 2001-0122, 2001-0343  
Actor: GUSTAVO MOYA ÁNGEL Y OTROS  
Acción Popular

- Los recursos provenientes del 6% de las rentas brutas del sector eléctrico, esto es, el 100% de las transferencias del sector eléctrico a Bogotá D.C., Ley 99 de 1993, artículo 45.
- El 100% del recaudo por concepto de otorgamiento licencias, permisos, autorizaciones, concesiones y salvoconductos en la cuenca.
- El aporte de la Empresa de Acueducto y Alcantarillado de Bogotá E.S.P. E.A.A.B.
- Los recursos provenientes de los incentivos tributarios artículo 424-5 (numeral 4º) y 428 literal f del Estatuto Tributario.
- Los recursos provenientes de la cooperación técnica, reconversión industrial, producción más limpia y créditos FINDETER.
- Los provenientes del Sistema General de Participaciones asignados a la Gobernación de Cundinamarca a través del Plan Departamental de Agua y Saneamiento de Cundinamarca (incluye los recursos del SGP del Municipio de Soacha). Sujeto a las normas de procedimiento y vigencias futuras y las que se expidan sobre el particular.
- Los demás recursos que se recauden con este propósito, provenientes de los organismos internacionales y demás instituciones públicas y privadas.

**4.5. ORDÉNASE** al *Consejo de la Cuenca Hidrográfica del Río Bogotá - CECH* - de manera inmediata y mientras se crea la *Gerencia de la Cuenca Hidrográfica del Río Bogotá - GCH* - constituir, desarrollar e implementar el **Observatorio Regional Ambiental y**

Expediente No. 25000-23-27-000-2001-0479-01  
Acumulados Nos. 2000-0428, 2001-0122, 2001-0343  
Actor: GUSTAVO MOYA ÁNGEL Y OTROS  
Acción Popular

**de Desarrollo Sostenible del Río Bogotá -ORARBO-**, como instrumento para la dirección y gestión integral de la cuenca hidrográfica, atendiendo los lineamientos y criterios expuestos en la parte motiva de esta providencia, este hecho lo deberá acreditar y comunicar al juez de instancia so pena de incurrir en desacato a orden judicial.

- 4.6. ORDÉNASE** al *Consejo de la Cuenca Hidrográfica del Río Bogotá - CECH* - de manera inmediata y mientras se crea la *Gerencia de la Cuenca Hidrográfica del Río Bogotá - GCH* - desarrollar e implementar el Sistema Regional de Información Ambiental para la Gestión Integral de la Cuenca Hídrica del Río Bogotá - SIGICA RÍO BOGOTÁ -, que como mínimo permita el registro, almacenamiento, validación, modelación, monitoreo, control, evaluación y divulgación de toda la información relacionada con la cuenca hidrográfica del Río Bogotá, atendiendo los lineamientos y criterios expuestos en la parte motiva de esta providencia.

En virtud de lo anterior, **ORDÉNASE** a las entidades públicas y a los particulares que, según criterio del CECH y posteriormente de la GCH, deban suministrar la información y alimentar al SIGICA RÍO BOGOTÁ, concurrir a hacerlo en la forma, frecuencia y metodología que establecerá la misma.

- 4.7. ADÓPTASE y DECLÁRASE** el Plan de Ordenación y Manejo de la Cuenca Hidrográfica del Río Bogotá - POMCA como máximo instrumento de planeación y

Expediente No. 25000-23-27-000-2001-0479-01  
Acumulados Nos. 2000-0428, 2001-0122, 2001-0343  
Actor: GUSTAVO MOYA ÁNGEL Y OTROS  
Acción Popular

gestión de la cuenca hidrográfica del Río Bogotá y, por ende, del CECH y la GCH, de acuerdo con lo dispuesto en el Decreto 2811 de 1974, la Ley 99 de 1993, el Decreto 1729 de 2002, la Ley 1450 de 2011 y el Decreto 1640 de 2012.

- 4.8. ORDÉNASE** a la Corporación Autónoma Regional de Cundinamarca - CAR que en el término perentorio e improrrogable de veinte (20) meses contados a partir de la ejecutoria de la sentencia, **MODIFIQUE Y ACTUALICE** el Plan de Ordenación y Manejo de la Cuenca Hidrográfica del Río Bogotá - POMCA articulándolo con los programas y líneas de acción del Proyecto de Adecuación Hidráulica y Recuperación Ambiental del Río Bogotá (CAR - 2011), del Plan de Gestión Ambiental 2008 - 2038 de la Secretaría Distrital de Ambiente, el Plan Departamental de Aguas - PDA de la Gobernación de Cundinamarca, las Evaluaciones Regionales del Agua - ERA - del Ideam y los demás instrumentos normativos y de planeación para la gestión integral de la cuenca hidrográfica. La articulación deberá realizarse igualmente con lo dispuesto en esta providencia, sin perjuicio de lo anterior, las órdenes impartidas por esta Corporación deberán ser acatadas inmediatamente.

Como requisito *sine qua non* para la aprobación y declaración del Plan de Ordenación y Manejo de la Cuenca Hidrográfica del Río Bogotá - POMCA por parte de la Corporación Autónoma Regional de Cundinamarca - CAR, se deberá contar con el aval del *Consejo Estratégico de la Cuenca Hidrográfica*

Expediente No. 25000-23-27-000-2001-0479-01  
Acumulados Nos. 2000-0428, 2001-0122, 2001-0343  
Actor: GUSTAVO MOYA ÁNGEL Y OTROS  
Acción Popular

del Río Bogotá - CECH - y posteriormente por el de la Gerencia de la Cuenca Hidrográfica del Río Bogotá - GCH -, las cuales tendrán la potestad de solicitar los ajustes en el marco de la dirección y gestión integral de la cuenca hidrográfica.

**4.9. DECLÁRASE** que cualquier estudio sobre la cuenca hidrográfica del Río Bogotá deberá sujetarse a las directrices del Consejo Estratégico de la Cuenca Hidrográfica del Río Bogotá - CECH - y posteriormente de la Gerencia de la Cuenca Hidrográfica del Río Bogotá - GCH -, para evitar la dispersión de esfuerzos y recursos.

**4.10. DECLÁRASE** que el ejecutor de las estrategias, planes, programas, proyectos y, en general, todas las actividades que sean priorizadas para la recuperación integral de la cuenca del Río Bogotá y su sostenibilidad, será definido por el Consejo Estratégico de la Cuenca Hidrográfica del Río Bogotá - CECH - y posteriormente por la Gerencia de la Cuenca Hidrográfica del Río Bogotá - GCH -, las mismas estarán a cargo de una o varias de las siguientes personas jurídicas o naturales: i) los Ministerios de Ambiente y Desarrollo Sostenible, Vivienda, Ciudad y Territorio, Minas y Energía, Trabajo; ii) Departamento de Cundinamarca; iii) Distrito Capital, iv) la Corporación Autónoma Regional de Cundinamarca - CAR; v) las entidades territoriales (municipios de ronda); vi) los personas a los cuales se hace referencia en esta

Expediente No. 25000-23-27-000-2001-0479-01  
Acumulados Nos. 2000-0428, 2001-0122, 2001-0343  
Actor: GUSTAVO MOYA ÁNGEL Y OTROS  
Acción Popular

providencia y vi) los demás que el CECH y la GCH consideren en el marco de ejecución del POMCA.

**4.11. ORDÉNASE** a la Corporación Autónoma Regional de Cundinamarca - CAR de manera inmediata adecuar los procedimientos de administración del Fondo de Inversiones para la Adecuación del Río Bogotá - FIAB -, creado mediante Acuerdo 28 de 2005 y modificado por el Acuerdo No. 15 de 19 de junio de 2007, de modo que toda inversión que se realice con los recursos de esta fuente esté contemplada en el Plan de Ordenación y Manejo de la Cuenca Hidrográfica del Río Bogotá - POMCA.

**ORDÉNASE** a la CAR y a todos los que estén ejecutando proyectos con estos recursos que semestralmente reporten al *Consejo Estratégico de la Cuenca Hidrográfica del Río Bogotá - CCH* - y posteriormente a la *Gerencia de la Cuenca Hidrográfica del Río Bogotá - GCH* los ingresos recibidos, las actividades ejecutadas, los resultados obtenidos y, en general, toda la información relacionada con la misma, lo anterior con el objeto de hacer la gestión y planeación correspondiente de manera coordinada por períodos anuales y de largo y mediano plazo.

**4.12. DECLÁRASE** que el Fondo de Inversiones para la Adecuación del Río Bogotá - FIAB - (*Acuerdo 28 de 2005 y modificado por el Acuerdo No. 15 de 19 de junio de 2007*) y el Fondo Común de Cofinanciamiento - FOCOF - hacen parte de las fuentes de financiación del POMCA. Los recursos

Expediente No. 25000-23-27-000-2001-0479-01  
Acumulados Nos. 2000-0428, 2001-0122, 2001-0343  
Actor: GUSTAVO MOYA ÁNGEL Y OTROS  
Acción Popular

destinados a dichos fondos no sólo financiarán las obras y proyectos que se adelanten para la capital sino para todo el perímetro de la cuenca.

**4.13. ORDÉNASE** al *Consejo Estratégico de la Cuenca Hidrográfica del Río Bogotá - CECH* - y posteriormente a la *Gerencia de la Cuenca Hidrográfica del Río Bogotá - GCH* -, promover la cooperación con visión regional de los entes territoriales entre sí y con las diferentes autoridades ambientales y demás actores relacionados con la cuenca hidrográfica del Río Bogotá para desarrollar planes de acción consensuados que compartan metas y recursos financieros, técnicos e institucionales. Para los fines anteriores y como punto de partida, **ORDÉNASE** al CECH y posteriormente a la GCH delimitar la Región Hídrica del Río Bogotá.

**4.14. ORDÉNASE** al Gobierno Nacional a través del Ministro del Ramo que una vez ejecutoriada esta sentencia, formule las políticas y expida la reglamentación necesaria para orientar y contribuir a la gestión integral de la cuenca hidrográfica del Río Bogotá teniendo en cuenta lo expuesto en esta providencia.

**4.15. ORDÉNASE** al Gobierno Nacional a través del Ministro del Ramo en coordinación con el Departamento Nacional de Planeación, efectuar el acompañamiento técnico, administrativo, institucional y financiero a las autoridades ambientales y a las entidades territoriales en el marco de lo decidido en esta providencia.

Expediente No. 25000-23-27-000-2001-0479-01  
Acumulados Nos. 2000-0428, 2001-0122, 2001-0343  
Actor: GUSTAVO MOYA ÁNGEL Y OTROS  
Acción Popular

**4.16. ORDÉNASE** al Gobierno Nacional otorgar el aval cuando así lo requiera la autoridad ambiental y de conformidad con el procedimiento previsto en el ordenamiento jurídico para la contratación de créditos internacionales para el desarrollo de proyectos en la Cuenca Hidrográfica, acorde con las prioridades establecidas por el Consejo Estratégico de la Cuenca Hidrográfica del Río Bogotá - CECH - y posteriormente por la Gerencia de la Cuenca Hidrográfica del Río Bogotá - GCH -.

**4.17. ORDÉNASE** al Gobierno Nacional suscribir convenios plan, para la estructuración, desarrollo y ejecución de los programas establecidos en la Ley 1450 de 2011 y los definidos en el POMCA una vez éste haya sido modificado acorde con el numeral 4.8. Programas éstos que, por su naturaleza, deben emprenderse mancomunadamente con una o varias Entidades Territoriales y Autoridades Ambientales con eventuales aportes del presupuesto nacional, e incorporar mecanismos de participación público-privada, de acuerdo con las normas contractuales vigentes según el tipo de Programa, lo anterior de conformidad con sus correspondientes competencias y las prioridades establecidas por el Consejo Estratégico de la Cuenca Hidrográfica del Río Bogotá - CECH - mientras se crea la Gerencia de la Cuenca Hidrográfica del Río Bogotá - GCH -, este hecho se deberá acreditar y comunicar al juez de instancia so pena de incurrir en desacato a orden judicial.

Expediente No. 25000-23-27-000-2001-0479-01  
Acumulados Nos. 2000-0428, 2001-0122, 2001-0343  
Actor: GUSTAVO MOYA ÁNGEL Y OTROS  
Acción Popular

**4.18. ORDÉNASE** al Distrito Capital y a los demás entes territoriales aferentes a la cuenca hidrográfica del Río Bogotá que en el término perentorio e improrrogable de doce (12) meses contados a partir de la aprobación y declaración de la modificación y actualización del Plan de Ordenación y Manejo de la Cuenca Hidrográfica del Río Bogotá - POMCA por parte de la Corporación Autónoma Regional de Cundinamarca - CAR, modifiquen y actualicen los Planes de Ordenamiento Territorial - POT, Planes Básicos de Ordenamiento Territorial - PBOT y Esquemas de Ordenamiento Territorial - EOT ajustándolos con los contenidos del mismo.

Adicionalmente, **ORDÉNASE** al Distrito Capital y a los demás entes territoriales aferentes al Río Bogotá, que en el actual proceso de modificación de los POTs, PBOT y EOT y de acuerdo con los términos que el ordenamiento jurídico ha establecido, incluyan en los mismos las variables ambientales, de cambio climático y la gestión de riesgos asociados a éstos.

Finalmente, **ORDÉNASE** a la Corporación Autónoma Regional de Cundinamarca - CAR asesorar al Distrito Capital y a los demás entes territoriales aferentes al Río Bogotá: i) en el actual proceso de modificación de los POTs, PBOT y EOT y ii) en su articulación con el Plan de Ordenación y Manejo de la Cuenca Hidrográfica del Río Bogotá - POMCA

Expediente No. 25000-23-27-000-2001-0479-01  
Acumulados Nos. 2000-0428, 2001-0122, 2001-0343  
Actor: GUSTAVO MOYA ÁNGEL Y OTROS  
Acción Popular

una vez modificado éste de acuerdo con lo dispuesto en el numeral 4.8.

**4.19. ORDÉNASE** al Distrito Capital y a los entes territoriales aferentes al Río Bogotá, que en el término perentorio e improrrogable de doce (12) meses contados a partir de la ejecutoria de esta sentencia, adopten en sus microcuencas los respectivos planes de manejo ambiental de conformidad con lo previsto en el título V del Decreto 1640 de 2012, como instrumento de protección a las fuentes hídricas.

**4.20. ORDÉNASE** al Distrito Capital y a los entes territoriales aferentes al Río Bogotá, que en el término perentorio e improrrogable de veinticuatro (24) meses contados a partir de la ejecutoria de esta sentencia, realicen, revisen y/o ajusten los Planes Maestros de Acueducto y Alcantarillado - PMAA de manera que se intercepten todos los vertimientos directos a cuerpos de agua y éstos sean conducidos a la planta de tratamiento de aguas residuales correspondiente. Los Planes Maestros de Acueducto y Alcantarillado - PMAA deberán incluir los planes de rehabilitación de redes.

Dichos entes deberán reportar semestralmente al Consejo Estratégico de la Cuenca Hidrográfica - CECH - y posteriormente a la Gerencia de la Cuenca Hidrográfica del Río Bogotá - GECH - las actividades que realicen.

Expediente No. 25000-23-27-000-2001-0479-01  
Acumulados Nos. 2000-0428, 2001-0122, 2001-0343  
Actor: GUSTAVO MOYA ÁNGEL Y OTROS  
Acción Popular

**4.21. ORDÉNASE** al Distrito Capital y a los entes territoriales aferentes al Río Bogotá, que en el término perentorio e improrrogable de veinticuatro (24) meses contados a partir de la ejecutoria de esta sentencia, realicen, revisen y/o ajusten los Planes de Saneamiento y Manejo de Vertimientos - PSMV de manera que se garantice efectivamente un manejo integral y se minimice y reduzca la contaminación en la cuenca hidrográfica del Río Bogotá, lo anterior bajo criterios técnicos y económicos.

Dichos entes deberán reportar semestralmente al *Consejo Estratégico de la Cuenca Hidrográfica - CECH* - y posteriormente a la *Gerencia de la Cuenca Hidrográfica del Río Bogotá - GECH* - las actividades que realicen.

**4.22. ORDÉNASE** al Distrito Capital y a los entes territoriales aferentes al Río Bogotá, que en el término perentorio e improrrogable de veinticuatro (24) meses contados a partir de la ejecutoria de esta sentencia, realicen, revisen y/o ajusten los Planes de Gestión Integrada de Residuos Sólidos - PGIRS. La formulación y elaboración del PGIRS deberá realizarse bajo un esquema de participación con los involucrados en la gestión, manejo y disposición de los residuos sólidos, acorde con los lineamientos de la jurisprudencia de la Corte Constitucional sobre el particular.

Expediente No. 25000-23-27-000-2001-0479-01  
Acumulados Nos. 2000-0428, 2001-0122, 2001-0343  
Actor: GUSTAVO MOYA ÁNGEL Y OTROS  
Acción Popular

Dichos entes deberán reportar semestralmente al *Consejo Estratégico de la Cuenca Hidrográfica - CECH* - y posteriormente a la *Gerencia de la Cuenca Hidrográfica del Río Bogotá - GECH* - las actividades que realicen.

**4.23. ORDÉNASE** a la Corporación Autónoma Regional de Cundinamarca - CAR y a todos y cada uno de los entes territoriales que hacen parte de la cuenca hidrográfica del Río Bogotá, que en el término perentorio e improrrogable de doce (12) meses contados a partir de la ejecutoria de esta sentencia, identifiquen e inventarién las áreas de manejo a las cuales hace referencia el Código de Recursos Naturales - Decreto 2811 de 1974 y las zonas de protección especial tales como páramos, subpáramos, nacimientos de agua y zonas de recarga de acuíferos que se encuentren en su jurisdicción, y de manera inmediata adopten las medidas necesarias para la protección, conservación y vigilancia de las mismas.

En especial:

i) **ORDÉNASE** a la Corporación Autónoma Regional de Cundinamarca - CAR y al Municipio de Villapinzón que en el término de veinticuatro (24) meses contados a partir de la ejecutoria de esta sentencia, adopten las medidas necesarias para la protección y conservación del Páramo de Guacheneque, nacimiento del Río Bogotá;

Expediente No. 25000-23-27-000-2001-0479-01  
Acumulados Nos. 2000-0428, 2001-0122, 2001-0343  
Actor: GUSTAVO MOYA ÁNGEL Y OTROS  
Acción Popular

ii) **ORDÉNASE** a la Corporación Autónoma Regional de Cundinamarca - CAR y al Distrito Capital que en el término de veinticuatro (24) meses contados a partir de la ejecutoria de esta sentencia, adopten las medidas necesarias para la protección y conservación de los nacimientos de agua que se encuentran en el corredor ambiental de la zona oriental de Bogotá;

iii) **ORDÉNASE** a la Corporación Autónoma Regional de Cundinamarca - CAR, que en el término de doce (12) meses contados a partir de la ejecutoria de esta sentencia, adopte las medidas necesarias para la protección y conservación del Distrito de Manejo Integrado del Salto de Tequendama.

La Corporación Autónoma Regional de Cundinamarca - CAR, el Departamento de Cundinamarca, el Distrito Capital y demás entes territoriales deberán reportar semestralmente al *Consejo Estratégico de la Cuenca Hidrográfica - CECH* - y posteriormente a la *Gerencia de la Cuenca Hidrográfica del Río Bogotá - GCH* -las actividades que realicen.

**4.24. ORDÉNASE** a la Corporación Autónoma Regional de Cundinamarca - CAR, al Departamento de Cundinamarca, al Distrito Capital y a todos y cada uno de los entes territoriales que hacen parte de la cuenca hidrográfica del Río Bogotá, que en el término perentorio e improrrogable de dieciocho (18) meses contados a partir de la ejecutoria de esta sentencia, identifiquen e inventarién las

Expediente No. 25000-23-27-000-2001-0479-01  
Acumulados Nos. 2000-0428, 2001-0122, 2001-0343  
Actor: GUSTAVO MOYA ÁNGEL Y OTROS  
Acción Popular

zonas donde se necesita iniciar procesos de reforestación protectora mediante la siembra de especies nativas colombianas y el cuidado de éstas. Precluido este plazo y en el término máximo de tres (3) meses prioricen las áreas degradadas o potrerizadas que necesitan con urgencia intervención para reforestación, la cual deberá iniciarse inmediatamente logrando progresivamente la recuperación y mantenimiento de todas ellas.

En especial, **ORDÉNASE** a la Corporación Autónoma Regional de Cundinamarca - CAR, al Departamento de Cundinamarca que de manera coordinada con el Municipio de Soacha y en el término perentorio e improrrogable de seis (6) meses contados a partir de la ejecutoria de esta sentencia, adopten las medidas necesarias para la reforestación de las zonas aledañas al Salto del Tequendama afectadas por la deforestación. **ORDÉNASE** a la Policía Ambiental y Ecológica realizar de manera inmediata y permanente operativos para la prevención de actividades que contravengan lo dispuesto en este numeral, en especial en el Municipio de Soacha y en el Salto de Tequendama.

Las anteriores entidades incluida la Policía Ambiental y Ecológica deberán reportar semestralmente al *Consejo Estratégico de la Cuenca Hidrográfica - CECH* - y posteriormente a la *Gerencia de la Cuenca Hidrográfica del Río Bogotá - GCH* -dichas actividades.

Expediente No. 25000-23-27-000-2001-0479-01  
Acumulados Nos. 2000-0428, 2001-0122, 2001-0343  
Actor: GUSTAVO MOYA ÁNGEL Y OTROS  
Acción Popular

**4.25. ORDÉNASE** al Departamento de Cundinamarca, al Distrito Capital, a la Corporación Autónoma Regional de Cundinamarca - CAR y a los entes territoriales aferentes del Río Bogotá, promover la conservación y recuperación de las áreas de importancia estratégica para la conservación de recursos hídricos que surten de agua a los acueductos municipales, distritales y regionales, mediante la adquisición y mantenimiento de dichas áreas y la financiación de los esquemas de pago por servicios ambientales, de acuerdo con la Ley 99 de 1993 - artículo 108 - Ley 1450 de 2011 - artículo 210 - y el Decreto reglamentario 953 de 2013.

Asimismo, **ORDÉNASE** al Departamento de Cundinamarca, al Distrito Capital y a los entes territoriales que hacen parte de la cuenca hidrográfica del Río Bogotá apropiar de manera inmediata un porcentaje no inferior al 1% de sus ingresos corrientes para la adquisición y mantenimiento de dichas zonas o para financiar esquemas de pago por servicios ambientales de acuerdo con la Ley 1450 de 2011 - artículo 210 - y el Decreto reglamentario 953 de 2013.

**ORDÉNASE** al Departamento de Cundinamarca, al Distrito Capital y a la Corporación Autónoma Regional de Cundinamarca - CAR que en el término perentorio e improrrogable de doce (12) meses contados a partir de la ejecutoria de esta sentencia identifiquen, delimiten y prioricen las

Expediente No. 25000-23-27-000-2001-0479-01  
Acumulados Nos. 2000-0428, 2001-0122, 2001-0343  
Actor: GUSTAVO MOYA ÁNGEL Y OTROS  
Acción Popular

áreas de importancia estratégica, con base en la información contenida en los planes de ordenación y manejo de cuencas hidrográficas, planes de manejo ambiental de microcuencas, planes de manejo ambiental de acuíferos o en otros instrumentos de planificación ambiental relacionados con el recurso hídrico.

La identificación, delimitación y priorización de las áreas de importancia estratégica, deberá contar con el aval del *Consejo Estratégico de la Cuenca Hidrográfica del Río Bogotá - CECH* - y posteriormente a la *Gerencia de la Cuenca Hidrográfica del río Bogotá - GCH* - quienes tendrán la potestad de solicitar los ajustes en el marco de la gestión integral de la cuenca.

**4.26. ORDÉNASE** al Ministerio de Ambiente y Desarrollo Sostenible en coordinación con el Ministerio de Minas y Energía que en el término perentorio e improrrogable de seis (6) meses contados a partir de la ejecutoria de esta sentencia, delimiten geográficamente las zonas excluidas de minería en donde no podrán ejecutarse trabajos y obras de explotación. Expídase en dicho plazo el acto administrativo correspondiente.

Asimismo, **ORDÉNASE** al Ministerio de Ambiente y Desarrollo Sostenible, al Ministerio de Minas y Energía, a la Agencia Nacional de Licencias Ambientales - ANLA, al Distrito Capital, a la Corporación Autónoma Regional de Cundinamarca -

Expediente No. 25000-23-27-000-2001-0479-01  
Acumulados Nos. 2000-0428, 2001-0122, 2001-0343  
Actor: GUSTAVO MOYA ÁNGEL Y OTROS  
Acción Popular

CAR y a los entes territoriales en los casos en que hayan sido delegados por la respectiva autoridad ambiental, que en el término perentorio e improrrogable de tres (3) meses, contados a partir de la expedición del acto administrativo referido, adelanten los correspondientes procesos administrativos dirigidos a i) revocar o suspender las licencias, títulos, permisos, autorizaciones o concesiones para el uso y aprovechamiento de los recursos naturales y del medio ambiente en las zonas de exclusión; ii) revocar o suspender las licencias, títulos, permisos, autorizaciones o concesiones para el uso y aprovechamiento de los recursos naturales cuando se establezca el incumplimiento de las condiciones o exigencias de acuerdo con los actos de expedición.

Igualmente, **ORDÉNASE** al Ministerio de Ambiente y Desarrollo Sostenible, al Ministerio de Minas y Energía, al Distrito Capital, a la Corporación Autónoma Regional de Cundinamarca - CAR y a los entes territoriales en los casos en que hayan sido delegados por la respectiva autoridad ambiental, que en el término perentorio e improrrogable (6) meses siguientes, contados a partir de la expedición del acto administrativo en comento, exijan de los particulares o entes públicos o privados a los que se les haya otorgado las licencias ambientales, autorizaciones, permisos o concesiones a cielo abierto, o en una zona específica, declarados responsables, la indemnización, restauración o sustitución

Expediente No. 25000-23-27-000-2001-0479-01  
Acumulados Nos. 2000-0428, 2001-0122, 2001-0343  
Actor: GUSTAVO MOYA ÁNGEL Y OTROS  
Acción Popular

morfológica y ambiental de todo el suelo intervenido en la explotación, por cuenta de los beneficiarios de dichos títulos, permisos, licencias o concesiones.

De otro lado, **ORDÉNASE** al Distrito Capital y a la Corporación Autónoma Regional de Cundinamarca - CAR en su respectiva jurisdicción y en coordinación con el Ministerio de Minas y Energía, que en el término perentorio e improrrogable de nueve (9) meses contados a partir de la expedición del acto administrativo referido, realice el inventario de Pasivos Ambientales Mineros -PAM con el objeto de adelantar los procesos administrativos y judiciales correspondientes.

Finalmente, **ORDÉNASE** al Distrito Capital, a la Corporación Autónoma Regional de Cundinamarca - CAR en el ámbito de su jurisdicción, en coordinación con los Ministerios de Minas y Energía y de Trabajo, que en el término perentorio e improrrogable de seis (6) meses contados a partir de la expedición del acto administrativo plurimencionado, en cuanto fuere posible, dentro del ámbito de sus competencias, incorporen en los proyectos mineros legales de la región a los integrantes de las familias con necesidades básicas insatisfechas que derivan su subsistencia de dicha actividad; o en otros proyectos socioeconómicos de acuerdo con la caracterización que de ellos se realice.

Expediente No. 25000-23-27-000-2001-0479-01  
Acumulados Nos. 2000-0428, 2001-0122, 2001-0343  
Actor: GUSTAVO MOYA ÁNGEL Y OTROS  
Acción Popular

La Corporación Autónoma Regional de Cundinamarca - CAR, el Departamento de Cundinamarca, el Distrito Capital y demás entes deberán reportar semestralmente al *Consejo Estratégico de la Cuenca Hidrográfica - CECH* - y posteriormente a la *Gerencia de la Cuenca Hidrográfica del Río Bogotá - GCH* - las actividades que realicen.

**4.27. ORDÉNASE** al Distrito Capital y a la Corporación Autónoma Regional de Cundinamarca - CAR que en el término perentorio e improrrogable de tres (3) años contados a partir de la ejecutoria de esta sentencia i) identifiquen, inventarién y delimiten todos y cada uno de los humedales y zonas de amortiguación de crecientes en su respectiva jurisdicción, ii) adopten las medidas necesarias para el restablecimiento de su estructura y función como ecosistemas; iii) propendan por su aprovechamiento y uso sostenible.

Igualmente, **ORDÉNASE** a la Corporación Autónoma Regional de Cundinamarca - CAR y a los entes territoriales aferentes al Río Bogotá que en el término perentorio e improrrogable de seis (6) meses contados a partir de la ejecutoria de esta sentencia, elaboren un plan de recuperación, restauración y manejo de los ríos y quebradas que hacen parte de la cuenca del Río Bogotá, el cual será incluido en el respectivo plan de desarrollo con los recursos financieros necesarios.

Expediente No. 25000-23-27-000-2001-0479-01  
Acumulados Nos. 2000-0428, 2001-0122, 2001-0343  
Actor: GUSTAVO MOYA ÁNGEL Y OTROS  
Acción Popular

La Corporación Autónoma Regional de Cundinamarca - CAR, y el Distrito Capital deberán reportar semestralmente al *Consejo Estratégico de la Cuenca Hidrográfica - CECH* - y posteriormente a la *Gerencia de la Cuenca Hidrográfica del Río Bogotá - GCH* -las actividades que realicen.

- 4.28. ORDÉNASE** al Ministerio de Ambiente y Desarrollo Sostenible que en aras de proteger los bienes que se encuentran dentro de las áreas que conforman el Sistema de Parques Nacionales Naturales de Colombia, solicite la inscripción de la limitación de dominio en el folio de matrícula inmobiliaria de cada predio, de acuerdo con el inciso 3° del artículo 57 de la Ley 1579 de 2012.

La Corporación Autónoma Regional de Cundinamarca - CAR, y el Distrito Capital deberán reportar semestralmente al *Consejo Estratégico de la Cuenca Hidrográfica - CECH* - y posteriormente a la *Gerencia de la Cuenca Hidrográfica del Río Bogotá - GCH* -las actividades que realicen.

- 4.29. ORDÉNASE** al Ministerio de Ambiente y Desarrollo Sostenible que en el término perentorio e improrrogable de doce (12) meses contados a partir de la ejecutoria de esta sentencia, realice los trámites necesarios para el reconocimiento del Salto de Tequendama como Patrimonio Natural de Colombia.

Expediente No. 25000-23-27-000-2001-0479-01  
Acumulados Nos. 2000-0428, 2001-0122, 2001-0343  
Actor: GUSTAVO MOYA ÁNGEL Y OTROS  
Acción Popular

Igualmente, **ORDÉNASE** al Ministerio de Cultura que en el término perentorio e improrrogable de doce (12) meses contados a partir de la ejecutoria de esta sentencia, realice los trámites necesarios para el reconocimiento del Salto de Tequendama y la Casa Museo como lugares de importancia histórica, cultural, paisajística y patrimonial. Mientras se surten los trámites correspondientes, **ORDÉNASE** al Ministerio de Cultura en coordinación con el Departamento de Cundinamarca y el Municipio de Soacha que de manera inmediata elaboren y ejecuten dentro del marco de sus competencias un plan que permita su preservación y conservación, de acuerdo con la parte motiva de esta decisión. Dichos entes deberán reportar al *Consejo Estratégico de la Cuenca Hidrográfica - CECH* - y posteriormente a la *Gerencia de la Cuenca Hidrográfica del Río Bogotá - GCH* -las actividades que realicen.

**4.30. ORDÉNASE** al Ministerio de Ambiente y Desarrollo Sostenible en coordinación con el Instituto de Hidrología, Meteorología y Estudios Ambientales de Colombia - Ideam que en el término perentorio e improrrogable de veinticuatro (24) meses contados a partir de la ejecutoria de esta sentencia, desarrolle y adopte una metodología específica para estimación de caudal ambiental y ecológico del Río Bogotá.

Igualmente, **ORDÉNASE** a la Corporación Autónoma Regional de Cundinamarca - CAR que de manera

Expediente No. 25000-23-27-000-2001-0479-01  
Acumulados Nos. 2000-0428, 2001-0122, 2001-0343  
Actor: GUSTAVO MOYA ÁNGEL Y OTROS  
Acción Popular

inmediata y mientras el Ministerio de Ambiente y Desarrollo Sostenible desarrolla y adopta una metodología específica y definitiva para la estimación del caudal ambiental y ecológico del Río Bogotá, inicie el cálculo para su determinación de acuerdo con la "*Metodología para la estimación del Caudal Ambiental en proyectos licenciados*" de la Universidad Nacional de Colombia, Facultad de Ingeniería, Contrato 0076-08 del Convenio Interadministrativo OEI-MAVDT No. 004-07 de 2007. **PREVÉNASE** que en un término no superior a seis (6) meses la Corporación Autónoma Regional de Cundinamarca - CAR deberá tener el resultado que garantice dicho caudal mínimo ambiental y ecológico en todo el cauce del Río Bogotá, en especial en el sector del Salto de Tequendama.

- 4.31. ORDÉNASE** a Emgesa o quien haga sus veces y a la Corporación Autónoma Regional de Cundinamarca - CAR coordinar con la Empresa de Energía de Bogotá E.E.B. de manera inmediata la realización de todas y cada una de las actividades necesarias para la operación y mantenimiento del embalse del Muña (*dragado, disposición de lodos, operación y mantenimiento del sistemas de aireación, cosechas y disposición de buchón, entre otros*), de acuerdo con lo dispuesto en la parte motiva de esta decisión.

La Corporación Autónoma Regional de Cundinamarca - CAR, Emgesa o quien haga sus veces deberán

Expediente No. 25000-23-27-000-2001-0479-01  
Acumulados Nos. 2000-0428, 2001-0122, 2001-0343  
Actor: GUSTAVO MOYA ÁNGEL Y OTROS  
Acción Popular

reportar semestralmente al *Consejo Estratégico de la Cuenca Hidrográfica - CCH* - y posteriormente a la *Gerencia de la Cuenca Hidrográfica del Río Bogotá - GCH* -las actividades que realicen.

- 4.32. ORDÉNASE** a la Corporación Autónoma Regional de Cundinamarca - CAR que continúe con la ejecución del proyecto denominado "*Adecuación Hidráulica y Recuperación Ambiental del Río Bogotá*" en el marco de la Estrategia para el Manejo Ambiental del Río Bogotá propuesta por el Consejo Nacional de Política Económica y Social - CONPES 3320 y en los compromisos concertados entre la CAR y la E.A.A.B. E.S.P. y la prevención de inundaciones en Bogotá.

**PREVÉNGASE** a la Universidad de la Sabana que las futuras obras civiles de infraestructura realizadas para mitigar los riesgos frente a las crecientes del Río Bogotá, se deberán ejecutar en coordinación con la autoridad ambiental y el Municipio de Chía, en el marco del proyecto denominado "*Adecuación Hidráulica y Recuperación Ambiental del Río Bogotá*".

- 4.33. ORDÉNASE** a la Corporación Autónoma Regional de Cundinamarca - CAR, al Departamento de Cundinamarca, al Distrito Capital y a los entes territoriales aferentes al Río Bogotá, promover de manera inmediata el uso eficiente y de ahorro del agua como elemento integrante y preponderante para la conservación y protección de los procesos hidrológicos, ecosistémicos y de biodiversidad.

Expediente No. 25000-23-27-000-2001-0479-01  
Acumulados Nos. 2000-0428, 2001-0122, 2001-0343  
Actor: GUSTAVO MOYA ÁNGEL Y OTROS  
Acción Popular

**PREVÉNGASE** a las mismas que promuevan de manera inmediata la reutilización del agua en actividades primarias y secundarias cuando el proceso técnico y económico así lo amerite y aconseje, según el análisis socioeconómico y las normas de calidad ambiental.

La Corporación Autónoma Regional de Cundinamarca - CAR, el Departamento de Cundinamarca, el Distrito Capital y demás entes deberán reportar semestralmente al *Consejo Estratégico de la Cuenca Hidrográfica - CECH* - y posteriormente a la *Gerencia de la Cuenca Hidrográfica del río Bogotá - GCH* -las actividades que realicen.

**4.34. ORDÉNASE** al Departamento de Cundinamarca, al Distrito Capital - Empresa Acueducto y Alcantarillado de Bogotá E.A.A.B. y a los entes territoriales aferentes al Río Bogotá, garantizar de manera inmediata la sostenibilidad de la oferta del recurso hídrico a los diferentes usuarios a lo largo de la cuenca, en especial a los habitantes de los municipios de la cuenca baja.

Asimismo, **ORDÉNASE** al Departamento de Cundinamarca -y al Distrito Capital -Empresa de Acueducto y Alcantarillado de Bogotá E.A.A.B. que de manera inmediata apoyen técnica, administrativa y financieramente el desarrollo de sistemas de abastecimiento hídrico que reduzcan el riesgo por falta de disponibilidad en las zonas de mayor contaminación o sobreexplotación del recurso.

Expediente No. 25000-23-27-000-2001-0479-01  
Acumulados Nos. 2000-0428, 2001-0122, 2001-0343  
Actor: GUSTAVO MOYA ÁNGEL Y OTROS  
Acción Popular

De otro lado, **ORDÉNASE** a la Corporación Autónoma Regional de Cundinamarca - CAR y al Distrito Capital que de manera inmediata implementen todas y cada una de las medidas necesarias para el adecuado manejo de las microcuencas y regulación hídrica para los fines anteriores.

La Corporación Autónoma Regional de Cundinamarca - CAR, el Departamento de Cundinamarca, el Distrito Capital y demás entes deberán reportar semestralmente al Consejo *Estratégico* de la Cuenca Hidrográfica - CECH - y posteriormente a la *Gerencia de la Cuenca Hidrográfica del Río Bogotá* - GCH -las actividades que realicen.

**4.35. DEFÍNASE** que el esquema de tratamiento para la descontaminación del Río Bogotá en la cuenca media estará constituido por dos (2) plantas de tratamiento de aguas residuales -PTAR de la siguiente forma:

- **Ampliación de la actual PTAR Salitre en caudal y capacidad de tratamiento.**
- **Construcción de una segunda planta aguas abajo de la desembocadura del Río Tunjuelo sobre el Río Bogotá.**

Las futuras decisiones en relación con la estrategia de saneamiento de la cuenca estarán a cargo del *Consejo Estratégico de la Cuenca*

Expediente No. 25000-23-27-000-2001-0479-01  
Acumulados Nos. 2000-0428, 2001-0122, 2001-0343  
Actor: GUSTAVO MOYA ÁNGEL Y OTROS  
Acción Popular

*Hidrográfica - CECH - y posterioremnte en la  
Gerencia de la Cuenca Hidrográfica del río Bogotá  
- GCH -.*

- 4.36. DEFÍNASE** que la segunda planta de tratamiento aguas abajo de la desembocadura del Río Tunjuelo sobre el Río Bogotá, quedará localizada en el sitio denominado "Canoas", por cuanto produce más de un servicio, como lo es la generación de energía eléctrica y puede lograr una economía global, además de que concibe valores agregados a través de la integración de actividades productivas y ambientales, fundamentadas en la sostenibilidad del recurso hídrico, de acuerdo con lo expuesto en la parte motiva de esta decisión.

El diseño y construcción de la planta de tratamiento en Canoas debe contemplar la estructura necesaria para la elevación de las aguas con el fin de i) su tratamiento ii) generación eléctrica en el Embalse del Muña.

- 4.37. DEFÍNASE** que la capacidad de tratamiento de las plantas de "El Salitre" y "Canoas" deberán cubrir la totalidad de las aguas residuales de la cuenca media.

La Empresa de Acueducto y Alcantarillado de Bogotá E.A.A.B. definirá la capacidad final que deberá tener el sistema de tratamiento de la cuenca media previendo el ingreso del agua pluvial al mismo, y decidirá sobre las acciones de rehabilitación que

Expediente No. 25000-23-27-000-2001-0479-01  
Acumulados Nos. 2000-0428, 2001-0122, 2001-0343  
Actor: GUSTAVO MOYA ÁNGEL Y OTROS  
Acción Popular

se requieran para evitar el ingreso de dicha agua. Lo anterior basado en consideraciones técnicas y económicas de que da cuenta la parte motiva de esta providencia.

La E.A.A.B. deberá reportar tal actuación al *Consejo Estratégico de la Cuenca Hidrográfica - CECH* - y posteriormente a la *Gerencia de la Cuenca Hidrográfica del Río Bogotá - GCH* -.

**4.38. DEFÍNASE** que el nivel de tratamiento de las plantas ubicadas en la cuenca media de acuerdo con lo dispuesto en los numerales 4.33 a 4.35, debe ser secundario con desinfección. Acorde con la tecnología disponible en el futuro el *Consejo Estratégico de la Cuenca Hidrográfica - CECH* - y posteriormente la *Gerencia de la Cuenca Hidrográfica del Río Bogotá - GCH* - evaluarán las condiciones técnicas y económicas que permitan la remoción de los nutrientes y cargas contaminantes a otro nivel más avanzado.

**4.39. ORDÉNASE** al Distrito Capital - Empresa de Acueducto y Alcantarillado de Bogotá E.A.A.B. que en el término perentorio e improrrogable de seis (6) meses contados a partir de la ejecutoria de la presente providencia, realice todas las gestiones administrativas y presupuestales correspondientes a la adquisición del predio con el fin de construir la planta de tratamiento de aguas residuales de Canoas y la estación elevadora, este hecho lo deberá acreditar y comunicar al juez de

Expediente No. 25000-23-27-000-2001-0479-01  
Acumulados Nos. 2000-0428, 2001-0122, 2001-0343  
Actor: GUSTAVO MOYA ÁNGEL Y OTROS  
Acción Popular

instancia so pena de incurrir en desacato a orden judicial.

**4.40. ORDÉNASE** al Distrito Capital - Empresa de Acueducto y Alcantarillado de Bogotá E.A.A.B. que en caso de no haber definido la necesidad de contar con los pozos ITC 9 y 11, lo haga en el término perentorio e improrrogable de diez (10) días contados a partir de la ejecutoria de la presente decisión. Lo anterior teniendo en cuenta las implicaciones económicas respecto de los recursos públicos y la obligación de propender por su garantía y protección, este hecho lo deberá acreditar y comunicar al juez de instancia so pena de incurrir en desacato a orden judicial.

**4.41. ORDÉNASE** al Distrito Capital - Empresa de Acueducto y Alcantarillado de Bogotá E.A.A.B. cumplir la providencia de 29 de octubre de 2012 proferida por el Despacho Sustanciador, en el sentido de:

- El GERENTE GENERAL y el GERENTE DEL SISTEMA MAESTRO DE LA E.A.A.B. E.S.P., entreguen de manera inmediata el predio denominado "Invías" al CONSORCIO CANOAS con el objeto de que se adelanten las actividades contractuales pendientes.
- El GERENTE DEL SISTEMA MAESTRO DE LA E.A.A.B. E.S.P. junto con el Contratista - CONSORCIO CANOAS, en un término de diez (10) días calendario, adopten la solución técnicamente viable de mínimo costo

Expediente No. 25000-23-27-000-2001-0479-01  
Acumulados Nos. 2000-0428, 2001-0122, 2001-0343  
Actor: GUSTAVO MOYA ÁNGEL Y OTROS  
Acción Popular

para la construcción del pozo ITC -12, especialmente, en lo que tiene que ver con la extracción de las máquinas que se encuentran a 63 y 69 metros de profundidad.

**4.42. ORDÉNASE** a la Corporación Autónoma Regional de Cundinamarca - CAR, al Distrito Capital - Secretaría Distrital de Ambiente - a la Empresa de Acueducto y Alcantarillado de Bogotá E.A.A.B. E.S.P. que de manera inmediata den cumplimiento a las obligaciones asumidas en el Convenio Interadministrativo 171 de 26 de junio de 2007, cuyo objeto es aunar esfuerzos para contribuir al logro del saneamiento del Río Bogotá.

**4.43. ORDÉNASE** a la Corporación Autónoma Regional de Cundinamarca - CAR que de manera inmediata de cumplimiento al Acuerdo 20 de octubre de 2012 relacionado con la incorporación, dentro del porcentaje ambiental ordenado por el artículo 44 de la Ley 99 de 1993, de los rendimientos financieros del 50% al total del recaudo por concepto predial de Bogotá generados entre 2012 y 2025, lo anterior para financiar las inversiones adicionales de adecuación hidráulica en la cuenca media del Río Bogotá, no previstas en el Convenio Interadministrativo 171 de 26 de junio de 2007.

**4.44. ORDÉNASE** al Ministerio de Vivienda, Ciudad y Territorio, al Departamento Nacional de Planeación, a la Gobernación de Cundinamarca, al Distrito Capital - Secretaría Distrital de

Expediente No. 25000-23-27-000-2001-0479-01  
Acumulados Nos. 2000-0428, 2001-0122, 2001-0343  
Actor: GUSTAVO MOYA ÁNGEL Y OTROS  
Acción Popular

Hacienda, a la Empresa de Acueducto y Alcantarillado de Bogotá E.A.A.B. E.S.P., y a la Corporación Autónoma Regional de Cundinamarca - CAR, que de manera inmediata den cumplimiento a las obligaciones asumidas en el Acuerdo de Cooperación de 21 de febrero de 2011 y su anexo financiero indicativo, relacionados con la construcción de la planta de tratamiento de aguas residuales de Canoas Fase I y II y su estación elevadora dentro del programa de saneamiento del Río Bogotá, en el contexto de la Región Capital Bogotá - Cundinamarca.

- 4.45. ORDÉNASE** al Departamento Nacional de Planeación - DNP realizar: i) seguimiento al Acuerdo de Cooperación de 21 de febrero de 2011 al cual se hizo referencia en el numeral anterior; ii) seguimiento al desarrollo y ejecución del Conpes 3631 de 14 de diciembre de 2009, relacionado con los componentes financieros del programa saneamiento del Río Bogotá; iii) evaluar la programación y ejecución de los recursos asignados a través del Sistema General de Participaciones - SGP a los entes territoriales con jurisdicción en la cuenca del Río Bogotá e informar cada seis (6) meses los avances *al Consejo Estratégico de la Cuenca Hidrográfica - CECH* - y posteriormente a la *Gerencia de la Cuenca Hidrográfica del Río Bogotá - GCH* -; iv) realizar los análisis técnicos a las posibles nuevas operaciones de crédito público que se generen para proyectos y programas de descontaminación del Río Bogotá e informar cada

Expediente No. 25000-23-27-000-2001-0479-01  
Acumulados Nos. 2000-0428, 2001-0122, 2001-0343  
Actor: GUSTAVO MOYA ÁNGEL Y OTROS  
Acción Popular

seis (6) meses los avances al *Consejo Estratégico de la Cuenca Hidrográfica - CECH* - y posteriormente a la *Gerencia de la Cuenca Hidrográfica del Río Bogotá - GCH* -.

**4.46. ORDÉNASE** al Ministerio de Vivienda, Ciudad y Territorio, al Departamento Nacional de Planeación, a la Gobernación de Cundinamarca, al Distrito Capital - Secretaría Distrital de Hacienda, a la Empresa de Acueducto y Alcantarillado de Bogotá E.A.A.B. E.S.P., y a la Corporación Autónoma Regional de Cundinamarca - CAR, que de manera inmediata den cumplimiento a las obligaciones asumidas en el Convenio Interadministrativo 03 de 29 de diciembre de 2011, cuyo objeto es aunar esfuerzos para la ejecución del proyecto "*Construcción de la Estación Elevadora de Aguas Residuales de Canoas para el Distrito Capital*", a realizarse en el Municipio de Soacha - Departamento de Cundinamarca.

**4.47. ORDÉNASE** a la Empresa de Acueducto y Alcantarillado de Bogotá E.A.A.B. E.S.P. y a EMGESA S.A. E.S.P., que de manera inmediata den cumplimiento al Convenio Interinstitucional 9-07-10200-0688-2011 de diciembre de 2011 y su anexo técnico, cuyo objeto es aunar esfuerzos para garantizar la construcción de la estación elevadora de Canoas, mediante aporte económico y operación.

Expediente No. 25000-23-27-000-2001-0479-01  
Acumulados Nos. 2000-0428, 2001-0122, 2001-0343  
Actor: GUSTAVO MOYA ÁNGEL Y OTROS  
Acción Popular

- 4.48. ORDÉNASE** al Fondo Nacional de Regalías en liquidación - FNR o quien haga sus veces y al Ministerio de Vivienda, Ciudad y Territorio que de manera inmediata realicen el giro de los recursos comprometidos en el marco del Convenio 03 de diciembre de 2011 y el Acuerdo 071 de 28 de diciembre de 2011, a la entidad fiduciaria constituida por la Empresa de Acueducto y Alcantarillado de Bogotá E.A.A.B. E.S.P. para su manejo y administración en la construcción de la Estación Elevadora de Aguas Residuales de Canoas. **PREVÉNGASE** a las mismas que garanticen en todo momento su disponibilidad en los términos de esta decisión, so pena de incurrir en desacato a orden judicial.
- 4.49. ORDÉNASE** al Distrito Capital - Secretaría Distrital de Ambiente y a la Corporación Autónoma Regional de Cundinamarca - CAR, que de manera inmediata den cumplimiento al convenio de cooperación de mayo de 2013, cuyo objeto es aunar esfuerzos para adelantar acciones conjuntas de articulación, planeación, gestión, control, protección, conservación y recuperación del medio ambiente en el marco de sus competencias.
- 4.50. ORDÉNASE** a EMGESA S.A. E.S.P. o a quien haga sus veces y mientras dure la concesión de agua para la generación de energía eléctrica en el embalse de El Muña, financiar la operación y mantenimiento de la estación elevadora de Canoas.

Expediente No. 25000-23-27-000-2001-0479-01  
Acumulados Nos. 2000-0428, 2001-0122, 2001-0343  
Actor: GUSTAVO MOYA ÁNGEL Y OTROS  
Acción Popular

**ORDÉNASE** al Gobierno Nacional - Ministerio de Minas y Energía en coordinación con los Ministerios de Vivienda, Ciudad y Territorio - Viceministerio de Agua y Saneamiento Básico - y Ambiente y Desarrollo Sostenible financiar la operación y mantenimiento de la estación elevadora de Canoas en el evento en que no se prorrogue la concesión de agua antes referida, o por cualquier otra circunstancia que la altere, modifique o termine. Para tal efecto podrán celebrar los convenios que consideren pertinentes.

**4.51. ORDÉNASE** al Departamento Nacional de Planeación y al Fondo Nacional de Regalías en Liquidación, que de manera inmediata den cumplimiento al Acuerdo 071 de 28 de diciembre de 2011, relacionado con la financiación del proyecto para el sector de agua potable y saneamiento básico, ejecutor Empresa de Acueducto y Alcantarillado de Bogotá E.A.A.B. E.S.P., en la cuantía allí señalada.

**4.52. DECLÁRASE** que la diferencia y actualización de los aportes económicos asumidos en el marco de los convenios y acuerdos suscritos para la financiación de las obras, actividades, planes proyectos y programas para la gestión integral de la Cuenca Hidrográfica del Río Bogotá, estarán a cargo de cada una de las entidades en el porcentaje que corresponda de acuerdo con la participación y compromisos adquiridos en los mismos.

Expediente No. 25000-23-27-000-2001-0479-01  
Acumulados Nos. 2000-0428, 2001-0122, 2001-0343  
Actor: GUSTAVO MOYA ÁNGEL Y OTROS  
Acción Popular

**4.53. ORDÉNASE** al Ministerio de Ambiente y Desarrollo Sostenible acreditar la condición de equipos y elementos nacionales e importados que se destinen a la construcción, instalación, montaje y operación de sistemas de control y monitoreo, necesarias para el cumplimiento de las disposiciones, regulaciones y estándares ambientales vigentes, de acuerdo con lo dispuesto en los artículos 424 numeral 7 y 428 literal f (*importación que no causa impuesto*) del Estatuto Tributario.

**4.54. ORDÉNASE** a la Autoridad Nacional de Licencias Ambientales - ANLA que en el término de tres (3) meses contados a partir de la ejecutoria de la presente providencia, realice los requerimientos de información y/o documentales que estime pertinentes, y adopte la decisión que corresponda de acuerdo con los parámetros constitucionales, legales y reglamentarios pertinentes en relación con la licencia ambiental para el proyecto de descontaminación del Río Bogotá, este hecho lo deberá acreditar y comunicar al juez de instancia so pena de incurrir en desacato a orden judicial.

**4.55. ORDÉNASE** al Distrito Capital - Empresa de Acueducto y Alcantarillado de Bogotá E.A.A.B. E.S.P. que en el término perentorio e improrrogable de seis (6) meses contados a partir de la ejecutoria de esta sentencia, elabore el plan para la identificación y corrección de las conexiones erradas del sistema sanitario al

Expediente No. 25000-23-27-000-2001-0479-01  
Acumulados Nos. 2000-0428, 2001-0122, 2001-0343  
Actor: GUSTAVO MOYA ÁNGEL Y OTROS  
Acción Popular

sistema pluvial de la ciudad y lo presente ante el *Consejo Estratégico de la Cuenca Hidrográfica - CECH* - mientras se crea la *Gerencia de la Cuenca Hidrográfica del Río Bogotá - GCH* -. **PREVÉNGASE** a dicha empresa distrital que de manera inmediata estudie las posibilidades técnicas o tecnológicas que permitan el ahorro de tiempo y recursos en su ejecución, este hecho lo deberá acreditar y comunicar al juez de instancia so pena de incurrir en desacato a orden judicial.

**4.56. ORDÉNASE** al Distrito Capital - Empresa de Acueducto y Alcantarillado de Bogotá E.A.A.B. E.S.P. y a los entes territoriales aferentes al Río Bogotá, para que en el término perentorio e improrrogable de seis (6) meses contados a partir de la ejecutoria de esta sentencia, elabore el plan de rehabilitación de redes a que se hace referencia en el numeral 4.19. **PREVÉNGASE** a dicha empresa distrital que una vez formulado el plan priorice las zonas más críticas desde el punto de vista operacional y ambiental, y comience su ejecución, este hecho lo deberá acreditar y comunicar al juez de instancia so pena de incurrir en desacato a orden judicial.

**4.57. ORDÉNASE** a la Corporación Autónoma Regional de Cundinamarca - CAR y al Departamento de Cundinamarca que cofinancien con los municipios de la cuenca alta en un término perentorio e improrrogable de tres (3) años contados a partir de la ejecutoria de la sentencia, la construcción,

Expediente No. 25000-23-27-000-2001-0479-01  
Acumulados Nos. 2000-0428, 2001-0122, 2001-0343  
Actor: GUSTAVO MOYA ÁNGEL Y OTROS  
Acción Popular

optimización y estandarización de los sistemas de tratamiento de aguas residuales municipales así como la asistencia técnica y administrativa, de manera que se cumpla con la regulación de vertimientos a cuerpos de agua, este hecho lo deberá acreditar y comunicar al juez de instancia so pena de incurrir en desacato a orden judicial.

**PREVÉNGASE** a los entes territoriales que garanticen el mejor manejo operacional de los sistemas de tratamiento de aguas residuales, de manera que se cumpla la legislación de vertimientos. Los costos de operación deberán ser incluidos en las tarifas de acuerdo con la Resolución 287 de 25 de mayo 2004 *"por la cual se establece la metodología tarifaria para regular el cálculo de los costos de prestación de los servicios de acueducto y alcantarillado"* y la Circular 001 de 31 de octubre 2013 *"Incorporación del costo de operación de tratamiento de aguas residuales (ctr) en el costo medio de operación particular del prestador en alcantarillado"*, ambas de la CRA.

La Corporación Autónoma Regional de Cundinamarca - CAR, el Departamento de Cundinamarca, el Distrito Capital y demás entes territoriales deberán reportar semestralmente al *Consejo Estratégico de la Cuenca Hidrográfica - CECH* - y posteriormente a la *Gerencia de la Cuenca Hidrográfica del Río Bogotá - GCH* - las actividades que realicen.

Expediente No. 25000-23-27-000-2001-0479-01  
Acumulados Nos. 2000-0428, 2001-0122, 2001-0343  
Actor: GUSTAVO MOYA ÁNGEL Y OTROS  
Acción Popular

**4.58. ORDÉNASE** a la Corporación Autónoma Regional de Cundinamarca - CAR, al Departamento de Cundinamarca, al Distrito Capital y a los entes territoriales de la cuenca aferente al Río Bogotá, que en el término perentorio e improrrogable de doce (12) meses contados a partir de la ejecutoria de esta sentencia, adopten todas y cada una de las medidas administrativas y económicas relacionadas con el incremento de operativos de control, de muestreo y contra-muestreo de la actividad industrial y agropecuaria de la cuenca hidrográfica del Río Bogotá.

Dichos entes deberán reportar semestralmente al *Consejo Estratégico de la Cuenca Hidrográfica - CECH* - posteriormente a la *Gerencia de la Cuenca Hidrográfica del Río Bogotá - GCH* - las actividades que realicen.

**4.59. ORDÉNASE** a la Corporación Autónoma Regional de Cundinamarca - CAR, al Distrito Capital en coordinación con el Departamento Administrativo Nacional de Estadística - DANE y a las Cámaras de Comercio, que dentro del término perentorio e improrrogable de tres (3) años contados a partir de la ejecutoria de esta sentencia, actualicen el censo de las empresas y personas que realicen actividades industriales con información de procesos productivos, caracterización de vertimientos y sistemas de tratamiento en la fuente en la cuenca hidrográfica del Río Bogotá.

Expediente No. 25000-23-27-000-2001-0479-01  
Acumulados Nos. 2000-0428, 2001-0122, 2001-0343  
Actor: GUSTAVO MOYA ÁNGEL Y OTROS  
Acción Popular

Los resultados deberán ser comunicados al *Consejo Estratégico de la Cuenca Hidrográfica - CECH* - y posteriormente a la *Gerencia de la Cuenca Hidrográfica del Río Bogotá - GCH* - dentro del mes siguiente a su conclusión.

**4.60. ORDÉNASE** al Ministerio de Ambiente y Desarrollo Sostenible que de manera inmediata cumpla lo dispuesto en la Ley 1333 del 21 de julio de 2009, artículos 57 y 59 parágrafo, y en la Resolución 415 de marzo 1º de 2010 que reglamentó el Registro Único de Infractores Ambientales RUIA.

**4.61. ORDÉNASE** al Ministerio de Ambiente y Desarrollo Sostenible y al Ministerio de Salud y Protección Social, que en el término perentorio e improrrogable de doce (12) meses contados a partir de la ejecutoria de esta sentencia, expida el reglamento técnico definitivo que prohíba la fabricación, importación, distribución y comercialización de detergentes que contengan fósforo por encima de los límites máximos establecidos en la normatividad. Dichos Ministerios deberán determinar un período de transición para la adopción de la medida acorde con las condiciones técnicas y económicas de la industria nacional, este hecho lo deberá acreditar y comunicar al juez de instancia so pena de incurrir en desacato a orden judicial.

**4.62. ORDÉNASE** a la Corporación Autónoma Regional de Cundinamarca - CAR, al Departamento de

Expediente No. 25000-23-27-000-2001-0479-01  
Acumulados Nos. 2000-0428, 2001-0122, 2001-0343  
Actor: GUSTAVO MOYA ÁNGEL Y OTROS  
Acción Popular

Cundinamarca y a los Municipios de Villapinzón y Chocontá, que en el término perentorio e improrrogable de un (1) año contado a partir de la ejecutoria de esta sentencia, realicen un censo de las personas y/o empresas que realicen actividades industriales con información de procesos productivos, caracterización de vertimientos y sistemas de tratamiento en la fuente de la actividad curtidora en cualquiera de sus etapas o procesos. Lo anterior con el fin de mantener un control real y efectivo de dicha actividad en el marco de la sostenibilidad del recurso hídrico, este hecho lo deberá acreditar y comunicar al juez de instancia so pena de incurrir en desacato a orden judicial.

- 4.63. ORDÉNASE** a la Corporación Autónoma Regional de Cundinamarca - CAR, al Departamento de Cundinamarca y a los Municipios de Villapinzón y Chocontá, que en el término perentorio e improrrogable de tres (3) años contados a partir de la ejecutoria de esta sentencia, cofinancien con los particulares y empresas curtidoras que operan en la región, la construcción y puesta en funcionamiento del Parque Ecoeficiente Industrial de las curtiembres en el lote de terreno que para tal fin ha sido adquirido por la autoridad ambiental.

**ORDÉNASE** al Distrito Capital que en el término perentorio e improrrogable de tres (3) años contados a partir de la ejecutoria de esta sentencia, cofinancien con los particulares y

Expediente No. 25000-23-27-000-2001-0479-01  
Acumulados Nos. 2000-0428, 2001-0122, 2001-0343  
Actor: GUSTAVO MOYA ÁNGEL Y OTROS  
Acción Popular

empresas curtidoras que operan en el Distrito, la construcción y puesta en funcionamiento del Parque Ecoeficiente Industrial de las curtiembres de San Benito.

**ORDÉNASE** a la Corporación Autónoma Regional de Cundinamarca - CAR, al Departamento de Cundinamarca, al Distrito Capital, a los Municipios de Villapinzón y Chocontá, al *Consejo Estratégico de la Cuenca Hidrográfica - CECH* - y posteriormente a la *Gerencia de la Cuenca Hidrográfica del Río Bogotá - GCH* -, prestar apoyo real y efectivo (*logístico, jurídico, administrativo, entre otros*) a las empresas y personas que se dedican a la actividad de las curtiembres en el periodo de transición que se presenta por la construcción de los Parques Ecoeficientes Industriales.

Los planes de implementación deberán ser reportados semestralmente al *Consejo Estratégico de la Cuenca Hidrográfica - CECH* - y posteriormente a la *Gerencia de la Cuenca Hidrográfica del Río Bogotá - GCH* -.

- 4.64. ORDÉNASE** a la Corporación Autónoma Regional de Cundinamarca - CAR y al Distrito Capital - Secretaría Distrital de Ambiente, en coordinación con la Fiscalía General de la Nación - Unidad Nacional de Fiscalías de delitos contra los Recursos Naturales y el Medio Ambiente y la Policía Ambiental y Ecológica incrementar de manera inmediata los operativos en los Municipios

Expediente No. 25000-23-27-000-2001-0479-01  
Acumulados Nos. 2000-0428, 2001-0122, 2001-0343  
Actor: GUSTAVO MOYA ÁNGEL Y OTROS  
Acción Popular

de Villapinzón, Chocontá y el Barrio San Benito, los cuales deben estar dirigidos a evitar las descargas clandestinas que hacen aquellas personas y/o empresas que no cuentan con autorizaciones, permisos y/o licencias y/o no cumplen con las exigencias en ellas contenidas.

**ÍNSTASE** a la Procuraduría General y a la Fiscalía General de la Nación iniciar las indagaciones e investigaciones pertinentes a los funcionarios públicos que han omitido el seguimiento y control ambiental por las descargas contaminantes de la industria de las curtiembres en dichas zonas, y sobre las cuales recae dicha obligación.

**ORDÉNASE** a la Corporación Autónoma Regional de Cundinamarca - CAR, al Distrito Capital y al Ministerio de Trabajo con el apoyo del Sena, la capacitar y reubicar laboralmente, en cuanto fuere posible, a las personas que dejen la actividad de las curtiembres.

**4.65. ORDÉNASE** a la Corporación Autónoma Regional de Cundinamarca - CAR coordinar con el IDEAM el desarrollo de información del Río Bogotá e integrarlo al proyecto de la red telemática para su monitoreo.

**4.66. ORDÉNASE** al Gobierno Nacional que de manera inmediata cumpla lo establecido en el artículo 184 de la Ley 1607 de 2012, en lo atinente a la elaboración de un estudio sobre la efectividad de

Expediente No. 25000-23-27-000-2001-0479-01  
Acumulados Nos. 2000-0428, 2001-0122, 2001-0343  
Actor: GUSTAVO MOYA ÁNGEL Y OTROS  
Acción Popular

impuestos, tasas, contribuciones y demás gravámenes existentes para la preservación y protección del ambiente; así como la identificación y viabilidad de nuevos tributos por la emisión de efluentes líquidos y de gases contaminantes y de efecto invernadero identificando los sujetos, las actividades y bases gravables, hechos generadores, y demás elementos del tributo.

Asimismo, **ORDÉNASE** al Ministerio de Ambiente y Desarrollo Sostenible que en el término perentorio e improrrogable de nueve (9) meses contados a partir de la ejecutoria de esta sentencia, modifique los parámetros de los instrumentos económicos - *tasas retributivas, compensatorias y de utilización de aguas* - , de manera tal que se desincentive la contaminación hídrica.

Dicho Ministerio deberá informar al Consejo Estratégico de la Cuenca Hidrográfica - CECH - y posteriormente a la Gerencia de la Cuenca Hidrográfica del Río Bogotá - GCH - tal actuación.

- 4.67. **ORDÉNASE** al Consejo Estratégico de la Cuenca Hidrográfica - CECH - y posteriormente a la Gerencia de la Cuenca Hidrográfica del Río Bogotá - GCH - identificar e implementar en un término perentorio e improrrogable de veinticuatro (24) meses contados a partir de la ejecutoria de esta sentencia, un sistema de evaluación del riesgo y valoración del daño ambiental, bajo los parámetros señalados en la parte motiva.

Expediente No. 25000-23-27-000-2001-0479-01  
Acumulados Nos. 2000-0428, 2001-0122, 2001-0343  
Actor: GUSTAVO MOYA ÁNGEL Y OTROS  
Acción Popular

4.68. **ORDÉNASE** al *Consejo Estratégico de la Cuenca Hidrográfica - CECH* - y posteriormente a la *Gerencia de la Cuenca Hidrográfica del Río Bogotá - GCH* - identificar e implementar en un término perentorio e improrrogable de doce (12) meses contados a partir de la ejecutoria de esta sentencia, un sistema de auditoría ambiental, bajo los parámetros señalados en la parte motiva.

4.69. **ORDÉNASE** a la Corporación Autónoma Regional de Cundinamarca - CAR, al Departamento de Cundinamarca y al Distrito Capital, que de manera inmediata adopten el Plan Estratégico Nacional de Investigación Ambiental como herramienta para la realización de una gestión eficiente y eficaz, orientada a la sostenibilidad ambiental, bajo los parámetros señalados en la parte motiva.

**ORDÉNASE** al Ministerio de Ambiente y Desarrollo Sostenible acompañar de manera permanente a través de sus institutos al *Consejo Estratégico de la Cuenca Hidrográfica - CECH* - y posteriormente a la *Gerencia de la Cuenca Hidrográfica del Río Bogotá - GCH* en los procesos de generación de conocimiento en el marco de los instrumentos de planificación y toma de decisión.

**ORDÉNASE** al Ministerio de Ambiente y Desarrollo Sostenible y a Colciencias que prioricen líneas de investigación en materias definidas por el *Consejo Estratégico de la Cuenca Hidrográfica - CECH* - y posteriormente por la *Gerencia de la Cuenca*

Expediente No. 25000-23-27-000-2001-0479-01  
Acumulados Nos. 2000-0428, 2001-0122, 2001-0343  
Actor: GUSTAVO MOYA ÁNGEL Y OTROS  
Acción Popular

*Hidrográfica del Río Bogotá* - GCH - quien dará continuidad.

- 4.70. ORDÉNASE** a la Corporación Autónoma Regional de Cundinamarca - CAR, al Distrito Capital y a los Municipios de Villapinzón y Chocontá, que en el término perentorio e improrrogable de seis (6) meses contados a partir de la ejecutoria de esta sentencia, incorporen el Programa Nacional de Producción más Limpia en el sector productivo de la región.

**ORDÉNASE** al Distrito Capital adoptar en un término máximo de seis (6) meses contados a partir de la ejecutoria de esta sentencia, las medidas para el mejoramiento del desempeño ambiental de las curtiembres con el apoyo del programa de la ventanilla ambiental ACERCAR - Asistencia Técnica Ambiental para la Pequeña y Mediana Empresa.

El plan de implementación deberá ser comunicado al *Consejo Estratégico de la Cuenca Hidrográfica - CECH* - y posteriormente a la *Gerencia de la Cuenca Hidrográfica del Río Bogotá* - GCH - semestralmente.

- 4.71. ORDÉNASE** a los Municipios de Villapinzón y Chocontá, que en la elaboración de sus Planes de Gestión Integral de los Residuos Sólidos - PGIRS-; en un plazo perentorio e improrrogable de seis (6) meses contados a partir de la ejecutoria de esta sentencia, incorporen los estudios realizados por

Expediente No. 25000-23-27-000-2001-0479-01  
Acumulados Nos. 2000-0428, 2001-0122, 2001-0343  
Actor: GUSTAVO MOYA ÁNGEL Y OTROS  
Acción Popular

el IDEA-UN Bogotá, para la gestión de residuos sólidos generados en la industria de las curtiembres, de acuerdo con la parte motiva.

Dicha implementación deberá ser comunicada al *Consejo Estratégico de la Cuenca Hidrográfica - CECH* - y posteriormente a la *Gerencia de la Cuenca Hidrográfica del Río Bogotá - GCH* - semestralmente.

**ORDÉNASE** al Ministerio de Educación Nacional, al Distrito Capital - Secretaría de Educación y a los municipios de la cuenca hidrográfica del Río Bogotá que en el término perentorio e improrrogable de seis (6) meses contados a partir de la ejecutoria de esta providencia, incluir en los Proyectos Ambientales Escolares - PRAES - el capítulo de reciclaje.

**ORDÉNASE** al Ministerio de Educación Nacional, al Distrito Capital - Secretaría de Educación y a los municipios de la cuenca hidrográfica del Río Bogotá, expedir en el término perentorio e improrrogable de seis (6) meses contados a partir de la ejecutoria de esta providencia, el programa educativo para los recicladores y diseñar una campaña para crear conciencia en la ciudadanía, de acuerdo con la parte motiva.

**ORDÉNASE** al Ministerio de Educación Nacional en el término perentorio e improrrogable de seis (6) meses contados a partir de la ejecutoria de esta providencia, definir los lineamientos

Expediente No. 25000-23-27-000-2001-0479-01  
Acumulados Nos. 2000-0428, 2001-0122, 2001-0343  
Actor: GUSTAVO MOYA ÁNGEL Y OTROS  
Acción Popular

curriculares, acorde con la política nacional de educación ambiental, con el objeto de que sean los establecimientos de educación formal en sus distintos niveles los que incluyan dentro de sus proyectos educativos los ambientales.

**ORDÉNASE** al Ministerio de Educación Nacional en el término perentorio e improrrogable de seis (6) meses contados a partir de la ejecutoria de esta providencia, adoptar conjuntamente con el Ministerio de Ambiente y Desarrollo sostenible los planes y programas docentes y el pensum que en los distintos niveles de la educación nacional se adelanten en relación con el medio ambiente y los recursos naturales renovables y promover los programas de divulgación y educación no formal, de acuerdo con consagrado en la Ley 1549 de 2012.

**ORDÉNASE** al *Consejo Estratégico de la Cuenca Hidrográfica - CCH* - y posteriormente a la *Gerencia de la Cuenca Hidrográfica del Río Bogotá - GCH* - promover en el término perentorio e improrrogable de seis (6) meses a partir de su constitución, la capacitación dirigida a las autoridades de la cuenca para sensibilizar y actualizar a los funcionarios en las normas, manejo y protección de la flora y la fauna silvestre, los ecosistemas en general y el Sistema de Gestión Integral de la Cuenca del Río Bogotá.

Expediente No. 25000-23-27-000-2001-0479-01  
Acumulados Nos. 2000-0428, 2001-0122, 2001-0343  
Actor: GUSTAVO MOYA ÁNGEL Y OTROS  
Acción Popular

**ORDÉNASE** al *Consejo Estratégico de la Cuenca Hidrográfica - CECH* - y posteriormente a la *Gerencia de la Cuenca Hidrográfica del Río Bogotá - GCH* - con el apoyo del Ministerio de Educación Nacional, el Departamento de Cundinamarca y el Distrito Capital capacitar a los habitantes de las áreas que integran la cuenca hidrográfica del Río Bogotá en el manejo de residuos sólidos, en un término perentorio e improrrogable de seis (6) meses contados a partir de su implementación.

**4.72. ORDÉNASE** a la *Corporación Autónoma Regional de Cundinamarca - CAR*, al *Departamento de Cundinamarca al Distrito Capital*, a los entes territoriales aferentes al Río Bogotá y a todos los habitantes de la cuenca hidrográfica, relizar jornadas cívicas para conmemorar el día mundial del agua que se celebra el 22 de marzo, tales como la limpieza de rondas, siembra de árboles, ciclopaseos, exposiciones y, en general actividades lúdicas, ambientales y ecológicas que involucren a los niños y jóvenes.

**4.73. ORDÉNASE** al *Consejo Estratégico de la Cuenca Hidrográfica del Río Bogotá - CECH* - y posteriormente a la *Gerencia de la Cuenca Hidrográfica del Río Bogotá - GCH* - de manera inmediata instrumentar un sistema de indicadores con el objeto de medir el grado de avance en el cumplimiento de esta decisión y, en general, de todas y cada una de las actividades para la gestión integral de la cuenca hidrográfica. Para

Expediente No. 25000-23-27-000-2001-0479-01  
Acumulados Nos. 2000-0428, 2001-0122, 2001-0343  
Actor: GUSTAVO MOYA ÁNGEL Y OTROS  
Acción Popular

los fines anteriores se deberá contar con el apoyo del Departamento Nacional de Planeación - DNP, el Departamento Administrativo Nacional de Estadística - DANE, el Instituto Geográfico Agustín Codazzi - IGAC, el Instituto de Hidrología, Meteorología y Estudios Ambientales (IDEAM), y los demás entes que el CECH y posteriormente la GCH consideren necesarios.

**ORDÉNASE** al *Consejo Estratégico de la Cuenca Hidrográfica - CECH* - y posteriormente a la *Gerencia de la Cuenca Hidrográfica del Río Bogotá - GCH* - adoptar los indicadores elaborados y/o contruidos en esta decisión y a los cuales se hace referencia expresa en la parte motiva.

**ORDÉNASE** a las autoridades ambientales y a los entes territoriales aferentes al Río Bogotá reportar los datos e información necesaria para la obtención de los índices correspondientes de acuerdo con el sistema de indicadores antes referido, en la forma, frecuencia y metodología que establecerá el *Consejo Estratégico de la Cuenca Hidrográfica del Río Bogotá - CECH* - y posteriormente la *Gerencia de la Cuenca Hidrográfica del Río Bogotá - GCH* -.

**ORDÉNASE** al Departamento Nacional de Planeación - DNP procesar y relacionar los datos requeridos para la obtención de los índices de desempeño integral municipal, población, magnitud de inversión, riesgo de calidad del agua, metros

Expediente No. 25000-23-27-000-2001-0479-01  
Acumulados Nos. 2000-0428, 2001-0122, 2001-0343  
Actor: GUSTAVO MOYA ÁNGEL Y OTROS  
Acción Popular

cúbicos de agua producida, viviendas conectadas al servicio de acueducto, inversión en agua potable y saneamiento básico por cada uno de los municipios aferentes al Río Bogotá, entre otros. El resultado deberá ser reportado al *Consejo Estratégico de la Cuenca Hidrográfica - CECH* - y posteriormente a la *Gerencia de la Cuenca Hidrográfica del Río Bogotá - GCH* -.

- 4.74. ORDÉNASE a la Corporación Autónoma Regional de Cundinamarca - CAR, al Departamento de Cundinamarca, al Distrito Capital, a los entes territoriales aferentes al Río Bogotá y a todos los habitantes de la cuenca hidrográfica, realizar jornadas cívicas para conmemorar el día mundial del agua que se celebra el 22 de marzo, tales como la limpieza de rondas, siembra de árboles, ciclo paseos, exposiciones y, en general, actividades lúdicas, ambientales y ecológicas que involucren a los niños y jóvenes.
- 4.75. ORDÉNASE al *Consejo Estratégico de la Cuenca Hidrográfica - CECH* - y posteriormente a la *Gerencia de la Cuenca Hidrográfica del Río Bogotá - GCH* - en coordinación con el Departamento Nacional de Planeación - DNP que una vez ejecutoriada esta sentencia, realicen la proyección de las inversiones, financiación y demás decisiones contenidas en esta providencia, con el objeto de verificar su ejecución y cumplimiento a corto, mediano y largo plazo. Para el efecto la Contraloría General de la República y

Expediente No. 25000-23-27-000-2001-0479-01  
Acumulados Nos. 2000-0428, 2001-0122, 2001-0343  
Actor: GUSTAVO MOYA ÁNGEL Y OTROS  
Acción Popular

la Procuraduría General de la Nación deberán realizar el respectivo acompañamiento.

**4.76. ÍNSTASE** a las **CONTRALORÍAS GENERAL DE LA REPÚBLICA, DEPARTAMENTAL Y DISTRITAL** a ejercer el correspondiente control de los recursos con destino a la gestión integral de la cuenca. En los mismos términos, **ÍNSTASE** a la **PROCURADURÍA GENERAL DE LA NACIÓN** para que realice el seguimiento y acompañamiento en la órbita de su competencia. **DECLÁRASE** que adicional a los instrumentos de auditoría y control preventivo y disciplinario contarán con la respectiva conectividad al Sistema Regional de Información Ambiental para la Gestión Integral de la Cuenca Hídrica del Río Bogotá - SIGICA RÍO BOGOTÁ.

**QUINTO: CONSTITÚYANSE** tres (3) Consejos de Cuenca - *alta, media y baja* - como instancias consultivas y representativas de quienes viven y desarrollan actividades en la cuenca hidrográfica. Cada uno de los Consejos estará integrado por los representantes de cada una de las personas jurídicas públicas y/o privadas asentadas y que desarrollen actividades en los subsistemas de la cuenca, así como de las comunidades campesinas, indígenas y afrodescendientes, y asociaciones de usuarios, gremios, según el caso. Tendrán como funciones aportar información disponible sobre la situación general de la cuenca y participar en las fases previas a la aprobación y declaratoria del

Expediente No. 25000-23-27-000-2001-0479-01  
Acumulados Nos. 2000-0428, 2001-0122, 2001-0343  
Actor: GUSTAVO MOYA ÁNGEL Y OTROS  
Acción Popular

Plan de Manejo y Ordenación de la Cuenca  
Hidrográfica del Río Bogotá - POMCA.

En virtud de lo anterior, **ORDÉNASE** a dichos  
Consejos que, según criterio del CECH y  
posteriormente de la GCH, suministren la  
información y alimenten al SIGICA RIO BOGOTÁ, y  
concurran a hacerlo en la forma, frecuencia y  
metodología que establezca la misma.

**CONSTITÚYASE EL COMITÉ** de verificación del  
cumplimiento de esta sentencia con las personas y  
fundaciones que se relacionan en la parte motiva  
de esta providencia, de acuerdo con los parámetros  
de la Ley 472 de 1998.

**SEXTO: ÁBRASE** cuaderno separado de copias de esta  
sentencia para efectos de hacer seguimiento de la  
decisión por parte de esta Corporación, de acuerdo  
con la parte motiva de esta decisión.

**SÉPTIMO:** En atención al memorial obrante a folios 14237 y  
14238 (Cdno. 22), por Secretaría expídanse las  
copias solicitadas.

**OCTAVO: ORDÉNASE** conjuntamente al Ministerio de Ambiente  
y Desarrollo Sostenible, al Departamento de  
Cundinamarca, a la Corporación Autónoma Regional  
de Cundinamarca - CAR, al Distrito Capital de  
Bogotá a través de la Secretaría Distrital de  
Ambiente y la Empresa de Acueducto y  
Alcantarillado de Bogotá E.A.A.B. E.S.P. publicar

Expediente No. 25000-23-27-000-2001-0479-01  
Acumulados Nos. 2000-0428, 2001-0122, 2001-0343  
Actor: GUSTAVO MOYA ÁNGEL Y OTROS  
Acción Popular

la parte resolutive de esta sentencia en un diario de amplia circulación nacional, dentro de los 10 días siguientes a la ejecutoria de la misma.

**NOVENO:** En cumplimiento de lo dispuesto en el artículo 80 de la Ley 472 de 1998, **REMÍTASE** copia auténtica de esta decisión a la Defensoría del Pueblo.

**DÉCIMO:** Ejecutoriado este proveído, **DEVUÉLVASE** el expediente al Tribunal de origen.

**CÓPIESE, NOTIFÍQUESE Y CÚMPLASE**

Se deja constancia de que la anterior providencia fue leída, discutida y aprobada por la Sala en la sesión de la fecha.

**GUILLERMO VARGAS AYALA**  
Presidente

**MARÍA ELIZABETH GARCÍA GONZÁLEZ**

**MARÍA CLAUDIA ROJAS LASSO**

**MARCO ANTONIO VELILLA MORENO**

Expediente No. 25000-23-27-000-2001-0479-01  
Acumulados Nos. 2000-0428, 2001-0122, 2001-0343  
Actor: GUSTAVO MOYA ÁNGEL Y OTROS  
Acción Popular

# ANEXO I

Expediente No. 25000-23-27-000-2001-0479-01  
Acumulados Nos. 2000-0428, 2001-0122, 2001-0343  
Actor: GUSTAVO MOYA ÁNGEL Y OTROS  
Acción Popular

**Modelo de Dirección y Gestión con Enfoque Sistémico de la Cuenca Hidrográfica del Río Bogotá**  
**Consejo de Estado**

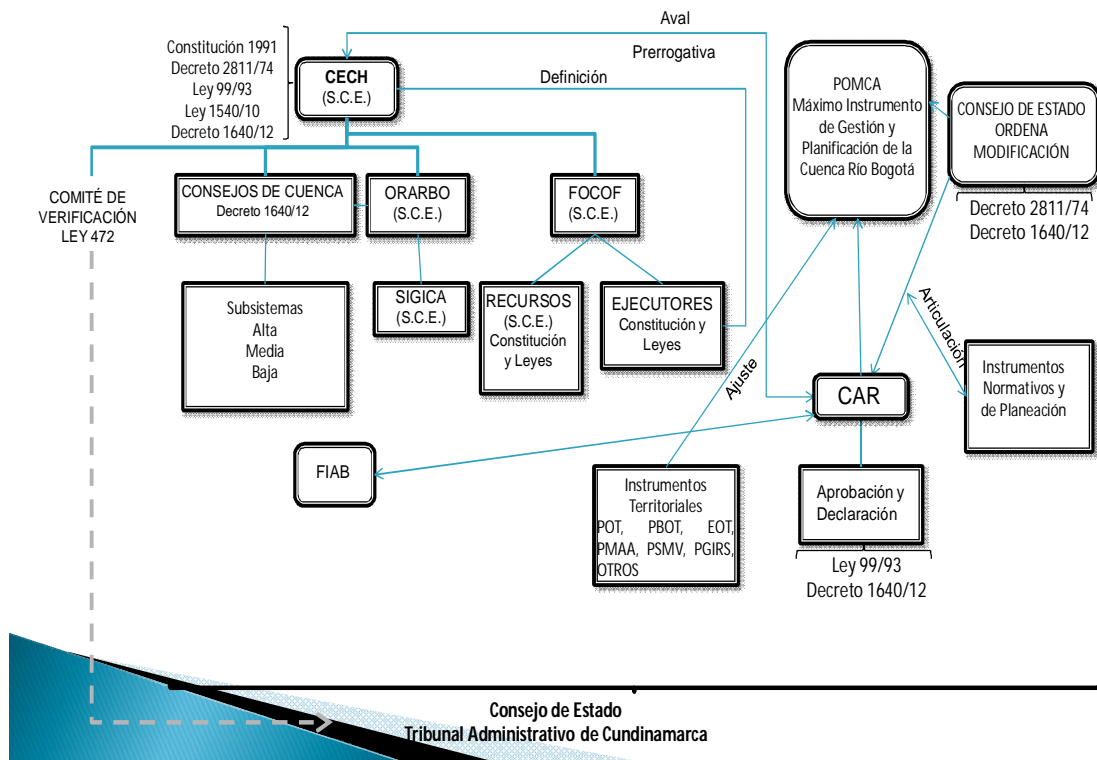

Expediente No. 25000-23-27-000-2001-0479-01  
Acumulados Nos. 2000-0428, 2001-0122, 2001-0343  
Actor: GUSTAVO MOYA ÁNGEL Y OTROS  
Acción Popular

# ANEXO II

# Componentes del Programa de Saneamiento del Río Bogotá

Datos estimados con base en información de las entidades (COL \$Billones de 2010)\*

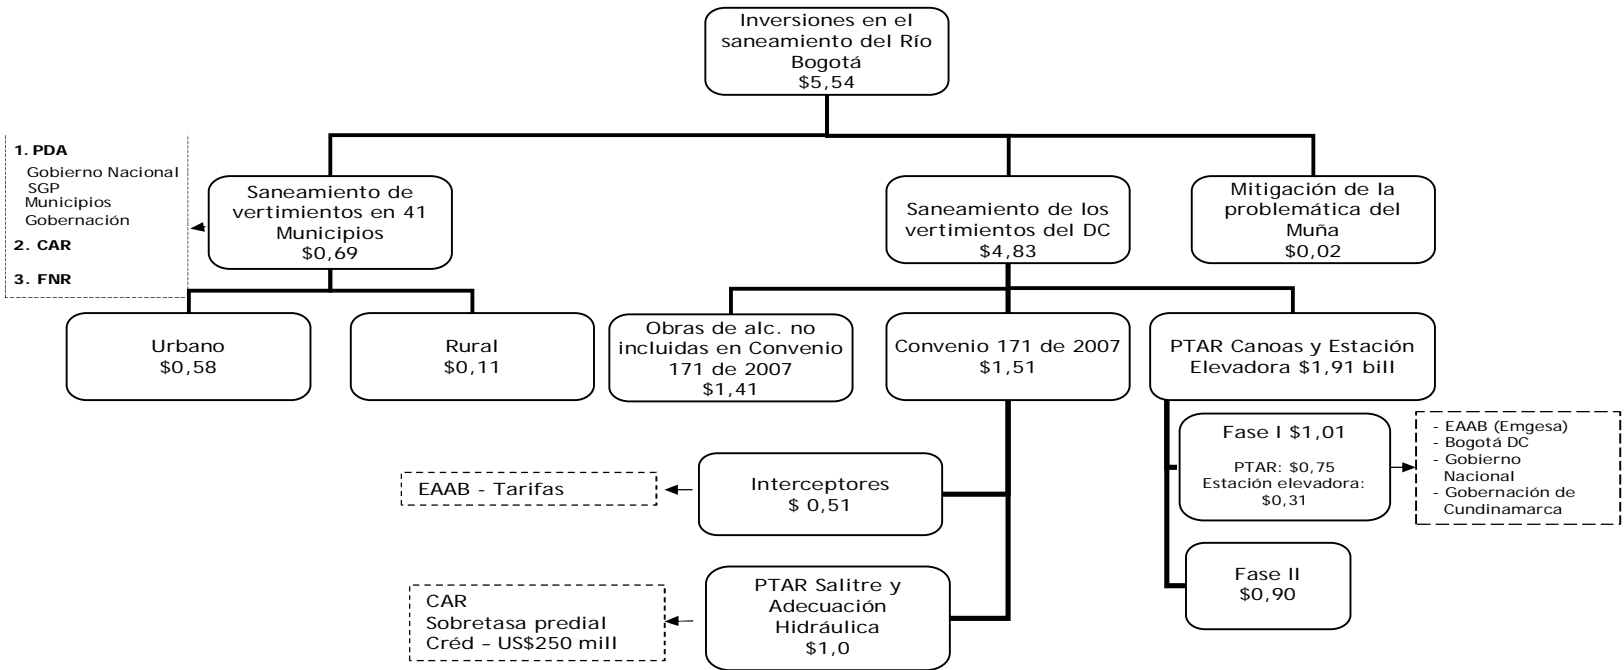

\* Los montos de inversión son preliminares con información a 2013 suministrada por entidades y están sujetos a estudios y diseños.  
Fuentes: EAAB ESP, CAR, MVCT, Gobernación de Cundinamarca, Alcaldía Mayor de Bogotá, DNP.

# **ANEXO III**

Expediente No. 25000-23-27-000-2001-0479-01  
Acumulados Nos. 2000-0428, 2001-0122, 2001-0343  
Actor: GUSTAVO MOYA ÁNGEL Y OTROS  
Acción Popular

RELACIÓN ACTIVIDADES Y REUNIONES INFORMALES ADELANTADAS  
EN DESARROLLO DE LA ACCIÓN POPULAR EXPEDIENTE RADICADO  
No. AP 25000232700020019047901 y acumulados 2000 0428,  
2001 0122 y 2001 0343.

| No. | Intervinientes - Entidad                                                                                                                                                                                                                             | Fecha      | Conclusiones                                                                                                                                                                                                                                                                                                                                                                                                                                                                                                                                                                |
|-----|------------------------------------------------------------------------------------------------------------------------------------------------------------------------------------------------------------------------------------------------------|------------|-----------------------------------------------------------------------------------------------------------------------------------------------------------------------------------------------------------------------------------------------------------------------------------------------------------------------------------------------------------------------------------------------------------------------------------------------------------------------------------------------------------------------------------------------------------------------------|
| 1   | Reunión Ministro de Vivienda , Ciudad y Territorio                                                                                                                                                                                                   | 16-11-2011 | <ul style="list-style-type: none"><li>• Sistema sanitario, recursos y proyectos de vivienda.</li></ul>                                                                                                                                                                                                                                                                                                                                                                                                                                                                      |
| 2   | PGN y CGR Criterios jurídicos, financieros y técnicos como aspectos puntuales para tener en cuenta en la segunda instancia. Se destaca la presencia y acompañamiento del Ministerio Público Delegados de Medio Ambiente y ante el Consejo de Estado. | 17-02-2012 | <ul style="list-style-type: none"><li>• Tener en cuenta a los actores, allegar informes actuales, conocer aspectos no solo coyunturales sino también estructurales. La decisión debe ser dinámica, que se adapte a la realidad.</li><li>• Tener en cuenta: directivas de la Procuraduría y de la Contraloría, así como los documentos CONPES.</li><li>• Debe ser una construcción colectiva con pluralidad de actores y de factores.</li><li>• Debe orientarse sobre criterios ambientales y de Política Pública.</li><li>• Debe tener un seguimiento permanente.</li></ul> |
| 3   | Aspectos del problema - Ministerio Público y Contraloría General de la República                                                                                                                                                                     | 22-02-2012 | <ul style="list-style-type: none"><li>• Jurídicos</li><li>• Técnicos</li><li>• Financieros</li></ul>                                                                                                                                                                                                                                                                                                                                                                                                                                                                        |
| 4   | Avance de proyectos Acueducto y CAR.                                                                                                                                                                                                                 | 13-04-2012 | Presentación conceptual de propuesta por parte del Acueducto.                                                                                                                                                                                                                                                                                                                                                                                                                                                                                                               |
| 5   | Autoridad Ambiental.- Competencia y Manejo de la Cuenca                                                                                                                                                                                              | 18-04-2012 | <ul style="list-style-type: none"><li>• Mínimos comunes a tener en cuenta:<ul style="list-style-type: none"><li>- Sentencia de primera instancia;</li><li>- CONPES;</li><li>- Convenio 171</li><li>- Control de advertencia de la Contraloría.</li><li>- Matriz de competencias</li></ul></li></ul>                                                                                                                                                                                                                                                                         |

Expediente No. 25000-23-27-000-2001-0479-01  
Acumulados Nos. 2000-0428, 2001-0122, 2001-0343  
Actor: GUSTAVO MOYA ÁNGEL Y OTROS  
Acción Popular

|   |                                                                                                                                                                                                         |            |                                                                                                                                                                                                                                                                                                                                                                                                                                                                                                           |
|---|---------------------------------------------------------------------------------------------------------------------------------------------------------------------------------------------------------|------------|-----------------------------------------------------------------------------------------------------------------------------------------------------------------------------------------------------------------------------------------------------------------------------------------------------------------------------------------------------------------------------------------------------------------------------------------------------------------------------------------------------------|
|   |                                                                                                                                                                                                         |            | <p>elaborada por la Contraloría General de la República.</p> <ul style="list-style-type: none"><li>- Esquema Financiero del Alcalde Dr. Jaime Castro.</li><li>- POMCA- Plan de Ordenamiento de manejo de la cuenca del Río Bogotá.</li><li>- Fondo de Financiación CAR Acueducto.</li><li>- Ley determinantes ambientales.</li><li>- Informes de gestión de la CAR, el Acueducto, Ministerio de Ambiente, entre otros.</li></ul> <p><b>Sugerencia:</b> convocar a entidades involucradas con el tema.</p> |
| 6 | Presentaciones ilustrativas reuniones informales de trabajo                                                                                                                                             | 27-04-2012 | Presentación Matriz de competencias (CGR) (diapositivas)                                                                                                                                                                                                                                                                                                                                                                                                                                                  |
| 7 | Presentaciones ilustrativas reuniones informales de trabajo                                                                                                                                             | 04-05-2012 | Presentación resumen de apelaciones y sentencia de primera instancia (PGN). (Diapositivas)                                                                                                                                                                                                                                                                                                                                                                                                                |
| 8 | Presentaciones ilustrativas reuniones informales de trabajo                                                                                                                                             | 10-05-2012 | Intervención y presentación: Secretaría de Ambiente, Acueducto y CAR. (Diapositivas)                                                                                                                                                                                                                                                                                                                                                                                                                      |
| 9 | Presentación Contraloría General: Todo lo relacionado con Canoas, auditoría realizada por la entidad. Implicaciones.                                                                                    | 17-05-2012 | Impacto Tarifa inversión PTAR Canoas                                                                                                                                                                                                                                                                                                                                                                                                                                                                      |
|   | Objeto: presentaciones de la CAR, avances, Acueducto y EMGESA. Establecer que ha pasado con las curtiembres en Villapinzón, seguimiento planes de manejo ambiental. Se sugiere realizar vistas de campo | 21-05-2012 | Presentaciones CAR                                                                                                                                                                                                                                                                                                                                                                                                                                                                                        |

Expediente No. 25000-23-27-000-2001-0479-01  
Acumulados Nos. 2000-0428, 2001-0122, 2001-0343  
Actor: GUSTAVO MOYA ÁNGEL Y OTROS  
Acción Popular

|    |                                                                                                                                                                                              |            |                                                                                                                                                                                                                                                                                                                                      |
|----|----------------------------------------------------------------------------------------------------------------------------------------------------------------------------------------------|------------|--------------------------------------------------------------------------------------------------------------------------------------------------------------------------------------------------------------------------------------------------------------------------------------------------------------------------------------|
|    | definir responsabilidades y recursos para su financiación                                                                                                                                    |            |                                                                                                                                                                                                                                                                                                                                      |
| 10 | EAAB Nueva Propuesta                                                                                                                                                                         | 8-06-2012  | Presentación diapositivas                                                                                                                                                                                                                                                                                                            |
| 11 | EMGESA                                                                                                                                                                                       | 13-06-2012 | Gestión en la represa del Muña                                                                                                                                                                                                                                                                                                       |
| 12 | Presentación EMGESA. Vice Ministerio de Agua y Saneamiento Básico. Ministerio de Minas y Energía.                                                                                            | 09-07-2012 | Presentación EMGESA (diapositivas) Embalse del Muña, propuesta técnica recuperación del embalse y propuesta estación elevadora de Canoas, financiación. Documento Conpes 3320 y sentencia de 2004. Cierre financiero 21 febrero de 2011, Acuerdo 071 de 2011 (Regalías), conflicto con nueva propuesta de la EAAB. Solución: Canoas. |
| 13 | Ministerios de Ambiente, Viceministerio de Aguas, Contraloría general de la República, Procuraduría General de la Nación, directora de licencias Ministerio de Ambiente.                     | 12-07-12   | Licencia ambiental. Recursos cierre financiero.                                                                                                                                                                                                                                                                                      |
| 14 | Ministerio de Ambiente                                                                                                                                                                       | 16-08-2012 | POMCA, concertación intersectorial macro cuenca y Plan de Saneamiento Básico del Río Bogotá. Sólo solicitud licencia en trámite y cierre financiero.                                                                                                                                                                                 |
| 15 | CAR                                                                                                                                                                                          | 24-08-2012 | Adecuación Hidráulica y recuperación ambiental Río Bogotá                                                                                                                                                                                                                                                                            |
| 16 | Banco Mundial                                                                                                                                                                                | 27-08-2012 | Aspectos financieros Proyecto río Bogotá-CAR.                                                                                                                                                                                                                                                                                        |
| 17 | Sobrevuelo cuenca del río Bogotá, Magistrado Dr. Marco Antonio Velilla, Procurador Delegado ante el Consejo de Estado Dr. Roberto A. Serrato, Contralores Delegados Dr. Cruz y Dr. Arbeláez. | 29-08-2012 | Sobrevuelo Río Bogotá.                                                                                                                                                                                                                                                                                                               |
| 18 | PGN y CGR                                                                                                                                                                                    | 05-09-     | Temas: Licencia ambiental,                                                                                                                                                                                                                                                                                                           |

Expediente No. 25000-23-27-000-2001-0479-01  
Acumulados Nos. 2000-0428, 2001-0122, 2001-0343  
Actor: GUSTAVO MOYA ÁNGEL Y OTROS  
Acción Popular

|    |                                                                                                                                                                                                       |            |                                                                                                                                                                                                                                                                                                                                 |
|----|-------------------------------------------------------------------------------------------------------------------------------------------------------------------------------------------------------|------------|---------------------------------------------------------------------------------------------------------------------------------------------------------------------------------------------------------------------------------------------------------------------------------------------------------------------------------|
|    |                                                                                                                                                                                                       | 2012       | autoridad ambiental del río, Resolución CAR, EMGESA y otras obras PTAR Sibaté. Se propone reunión con alcaldes, requerir estudios Carboneras, Soacha y al Ministerio Ambiente, lo relativo al manejo de metales pesados, normatividad, análisis de caracterización, transición, progresividad.                                  |
| 19 | Fundación Cuenca baja Tequendama Casa del Salto. Modelo ríos Sena, Támesis y Danubio.                                                                                                                 | 05-09-2012 | Informa sobre la gestión adelantada por la fundación para recuperar la casa del salto y lograr alcanzar el caudal ecológico, publicaciones elaboradas.                                                                                                                                                                          |
| 20 | EMGESA - Mpio. de Soacha y EEB.                                                                                                                                                                       | 12-09-2012 | Alcaldía Soacha refiere conveniencia de la PTAR Canoas, indica los avances de las obras en túneles y conectores en el municipio. Informe de gestión administración embalse del Muña. (diapositivas).                                                                                                                            |
| 21 | Visitas informales cuencas alta, media y baja del Río Bogotá                                                                                                                                          | 20-09-2012 | Recorrido cuenca oriental, quebrada Tibanicas, embalse aguas lluvias Terreros, Interceptor Terreros, el Rosal - La Isla entrega al Río Tunjuelo. Interceptor Tunjuelo-Canoas, avance obra 96%, Túnel de Emergencia. Predios INVIAS y CANOAS. Residuos sólidos Gibraltar, urgente regulación biosólidos. (registro fotográfico). |
| 22 | Visita con el contratista Interceptores Tunjuelo-Canoas Contrato 2009 ITC Pozos 1 a 12, no construido el 9 ni el 12, piscina de aquietamiento túnel de emergencia, escalera de entrega al Río Bogotá. | 21-09-2012 | Precisión sobre avance de las obras del contrato, registro fotográfico.                                                                                                                                                                                                                                                         |
| 23 | Visita coordinada por EMGESA Charquito, muros de contención, EMGESA ha                                                                                                                                | 26-09-2012 | Propuesta construir planta elevadora dependiendo de la concesión. Administración                                                                                                                                                                                                                                                |

Expediente No. 25000-23-27-000-2001-0479-01  
Acumulados Nos. 2000-0428, 2001-0122, 2001-0343  
Actor: GUSTAVO MOYA ÁNGEL Y OTROS  
Acción Popular

|    |                                                                                                                                                                                                                                                                                                                                                                |            |                                                                                                                                                                                                                                                                                                                                                     |
|----|----------------------------------------------------------------------------------------------------------------------------------------------------------------------------------------------------------------------------------------------------------------------------------------------------------------------------------------------------------------|------------|-----------------------------------------------------------------------------------------------------------------------------------------------------------------------------------------------------------------------------------------------------------------------------------------------------------------------------------------------------|
|    | realizado estudio de suelos y de factibilidad, estación elevadora. Visita a la estación de bombeo generación eléctrica, desarrollo eléctrico de El Charquito, inicialmente plantas pequeñas sin embalse, luego vino el embalse del Muña en 1948, luego Paraiso y Guaca, descarga en el Limonar y a su vez en la central La Tinta y la Junca, hoy cadena Pagua. |            | Embalse del Muña. Esquema de saneamiento del río: embalse del Muña, resultados, construcción de diques y estación de bombeo, secado de colas, construcción sendero ecológico, eliminación del buchón del embalse, monitoreo. Proyecto próximo molino paplero, pulpa de papel para extraerlo del buchón, pequeña empresa reciclaje papel del buchón. |
| 24 | Municipios cuenca alta, media y baja.                                                                                                                                                                                                                                                                                                                          | 10-10-2012 | Alcaldes Chía, inundaciones: propuesta técnica; Funza: Desvío río Bogotá segunda pista aeropuerto, propuesta para los planes de ordenamiento territorial, Villapinzón, Sibaté, Tocancipá, Gachancipá, Federación de Municipios.                                                                                                                     |
| 25 | Visita Planta de San Fernando en Medellín y proyecto de Bello. Procurador Delegado, Contralores Delegados.                                                                                                                                                                                                                                                     | 22-10-2012 | Revisar el proyecto; sus avances y conocer el modelo de funcionamiento de la Planta de Tratamiento del Río Medellín, así como sus fuentes de financiación- Presentaciones.                                                                                                                                                                          |
| 26 | Visita CAR Tocancipá - Zipaquirá                                                                                                                                                                                                                                                                                                                               | 25-10-2012 | Información sobre canteras explotación arenera en el sector, Polígonos (Tocancipá, Cogua y Nemocón) Zonas compatibles con la minería definidas por el MADS-Títulos Mineros Ministerio de Minas y Energía. Cunetas, sedimentadores y circuitos recuperadores son las exigencias de explotación.                                                      |
| 27 | Reunión Alta Consejera para el D.C.                                                                                                                                                                                                                                                                                                                            | 29-10-2012 | Informar y fijar fecha reunión 7 de noviembre de 2012.                                                                                                                                                                                                                                                                                              |
| 28 | Reunión levanta medida cautelar: EMGESA, EAAB, EEB, Alta Consejera para el D.C., Regalías; Departamento de                                                                                                                                                                                                                                                     | 7-11-2012  | Se da lectura al auto de 29 de octubre de 2012 dispuso entre otras levantar la medida cautelar. Se reitera el carácter informal de las                                                                                                                                                                                                              |

Expediente No. 25000-23-27-000-2001-0479-01  
Acumulados Nos. 2000-0428, 2001-0122, 2001-0343  
Actor: GUSTAVO MOYA ÁNGEL Y OTROS  
Acción Popular

|                                                             |                                                                                                                                                                                                                                                                                                                                                                                                                                                                                                                                                                                                                                                                                                                                                                                                                                                                                                                                                                                                                                                                                                                                                                                                                                                                                                                                                                                                                                          |
|-------------------------------------------------------------|------------------------------------------------------------------------------------------------------------------------------------------------------------------------------------------------------------------------------------------------------------------------------------------------------------------------------------------------------------------------------------------------------------------------------------------------------------------------------------------------------------------------------------------------------------------------------------------------------------------------------------------------------------------------------------------------------------------------------------------------------------------------------------------------------------------------------------------------------------------------------------------------------------------------------------------------------------------------------------------------------------------------------------------------------------------------------------------------------------------------------------------------------------------------------------------------------------------------------------------------------------------------------------------------------------------------------------------------------------------------------------------------------------------------------------------|
| Cundinamarca, y<br>Contraloría General de la<br>República . | reuniones por el Dr. Velilla, con la participación y acompañamiento del Ministerio Público y de la Contraloría General de la República, destaca la gestión adelantada por el Tribunal Administrativo de Cundinamarca. EMGESA pone de presente su preocupación en relación con la construcción y puesta en marcha de la Estación elevadora pues ya se ha presentado una propuesta por el consorcio OBERDRECH la cual debe ser analizada y valorada. La EE sigue un diseño único con un concepto técnico de interceptores y túnel de emergencia que obedece a la planta de tratamiento de Canoas, razón por la cual se requiere el activo de la Empresa de Energía (EMGESA: 84 mil millones de pesos). La EAAB, advierte que la estación elevadora requiere de caudal y por ello las obras deben ser financiadas por EMGESA, debe precisarse la responsabilidad financiera y definir quién asumirá su administración en el evento que culmine la concesión. Ya se ha contratado el diseño de detalle para la planta y se adjudicará de acuerdo con las necesidades que prevea la sentencia, se defina el predio y las necesidades técnicas. Pone de presente su inconformidad con la sentencia en cuanto a los términos para la construcción de la PTAR CANOAS y del ITC (Interceptor Tunjuelo-Canoas), así como su financiación, éste último hoy ya construido. La EAAB solicita se tengan en cuenta en la sentencia los cambios técnicos |
|-------------------------------------------------------------|------------------------------------------------------------------------------------------------------------------------------------------------------------------------------------------------------------------------------------------------------------------------------------------------------------------------------------------------------------------------------------------------------------------------------------------------------------------------------------------------------------------------------------------------------------------------------------------------------------------------------------------------------------------------------------------------------------------------------------------------------------------------------------------------------------------------------------------------------------------------------------------------------------------------------------------------------------------------------------------------------------------------------------------------------------------------------------------------------------------------------------------------------------------------------------------------------------------------------------------------------------------------------------------------------------------------------------------------------------------------------------------------------------------------------------------|

Expediente No. 25000-23-27-000-2001-0479-01  
Acumulados Nos. 2000-0428, 2001-0122, 2001-0343  
Actor: GUSTAVO MOYA ÁNGEL Y OTROS  
Acción Popular

|  |  |  |                                                                                                                                                                                                                                                                                                                                                                                                                                                                                                                                                                                                                                                                                                                                                                                                                                                                                                                                                                                                                                                                                                                                                                                                                                                                                                                                                                                                                                                |
|--|--|--|------------------------------------------------------------------------------------------------------------------------------------------------------------------------------------------------------------------------------------------------------------------------------------------------------------------------------------------------------------------------------------------------------------------------------------------------------------------------------------------------------------------------------------------------------------------------------------------------------------------------------------------------------------------------------------------------------------------------------------------------------------------------------------------------------------------------------------------------------------------------------------------------------------------------------------------------------------------------------------------------------------------------------------------------------------------------------------------------------------------------------------------------------------------------------------------------------------------------------------------------------------------------------------------------------------------------------------------------------------------------------------------------------------------------------------------------|
|  |  |  | <p>y los costos. EMGESA, reitera la necesidad de asignar responsabilidades en la construcción de obras, se tiene la preocupación de que un ente público aporte dineros sólo para beneficiar a una empresa privada lo cual no comparte. Llama la atención que el problema es de responsabilidad civil y no de carga administrativa y financiera. Por ello se debe identificar a los responsables, indemnizarlos y prevenirlos. EMGESA acepta la carga adicional, entonces no tiene que ver con el beneficio o la desventaja de la Estación Elevadora. La Consejería para el D.C. manifiesta que la contaminación del río Bogotá es su preocupación. Así lo plasmó el Gobierno Nacional en acuerdo con el Distrito Capital y el Departamento para la construcción de la PTAR CANOAS. Reparto de recursos: Nación 191 mil millones que se encuentran en peligro de perderse. Corresponde a la EAAB hacer las gestiones de plata provenientes de las regalías específicamente para Canoas. Destaca la necesidad de acatar el fallo judicial que involucra a todas las partes y el detrimento patrimonial para el Estado de no construir la PTAR CANOAS. El asesor legal externo de Regalías pone de presente que el Fondo Nacional de Regalías en sesión de 28 de diciembre de 2011, aprobó el presupuesto para la Estación Elevadora de CANOAS por la suma de 115.404 millones provenientes de los recursos de las regalías, los cuales deben</p> |
|--|--|--|------------------------------------------------------------------------------------------------------------------------------------------------------------------------------------------------------------------------------------------------------------------------------------------------------------------------------------------------------------------------------------------------------------------------------------------------------------------------------------------------------------------------------------------------------------------------------------------------------------------------------------------------------------------------------------------------------------------------------------------------------------------------------------------------------------------------------------------------------------------------------------------------------------------------------------------------------------------------------------------------------------------------------------------------------------------------------------------------------------------------------------------------------------------------------------------------------------------------------------------------------------------------------------------------------------------------------------------------------------------------------------------------------------------------------------------------|

Expediente No. 25000-23-27-000-2001-0479-01  
Acumulados Nos. 2000-0428, 2001-0122, 2001-0343  
Actor: GUSTAVO MOYA ÁNGEL Y OTROS  
Acción Popular

|    |                                     |            |                                                                                                                                                                                                                                                                                                                                                                                                                                                                                                                                                                                                                                                                                                                                                                                                                                                                                                                                                                                                                                                                                                                                        |
|----|-------------------------------------|------------|----------------------------------------------------------------------------------------------------------------------------------------------------------------------------------------------------------------------------------------------------------------------------------------------------------------------------------------------------------------------------------------------------------------------------------------------------------------------------------------------------------------------------------------------------------------------------------------------------------------------------------------------------------------------------------------------------------------------------------------------------------------------------------------------------------------------------------------------------------------------------------------------------------------------------------------------------------------------------------------------------------------------------------------------------------------------------------------------------------------------------------------|
|    |                                     |            | <p>ejecutarse con la finalidad aprobada. La Contraloría general de la República manifiesta su preocupación porque no se ha manejado en la cuenca del río Bogotá el concepto de "Valoración del daño ambiental" señala al respecto que la decisión debe tener un carácter omnicomprensivo.</p>                                                                                                                                                                                                                                                                                                                                                                                                                                                                                                                                                                                                                                                                                                                                                                                                                                          |
| 29 | Reunión Gobernación de Cundinamarca | 07-02-2013 | <p>La Gobernación de Cundinamarca presenta los avances de la gestión adelantada por el Departamento en relación con las órdenes impartidas por el Tribunal de instancia:</p> <ul style="list-style-type: none"><li>- Acuerdo entre municipios y departamento construcción Planes Maestros Acueducto y alcantarillado- Manejo residuos sólidos. Discusión Planta de Tratamiento en Canoas; apoyo municipios administración plantas de tratamiento; necesidad de incrementar sanciones sector industrial así como las tasas retributivas. Implementar monitoreo trayecto del río; generar una política en materia de vertimientos; estructurar y concesionar el relleno Nuevo Mondoñedo tratamiento lixiviados; clasificación en la fuente y reciclaje. El Procurador Delegado solicita incorporar en los POT la variable ambiental. Destinar el 1% adquisición predios, art. 111 Ley 99 de 1993. Definir acciones frente al riesgo del cambio climático. Proyectos de vivienda deben sujetarse a lo regulado en materia de vertimientos y emisiones en el sector. Recuperar espejos de agua de los humedales previstos en los</li></ul> |

Expediente No. 25000-23-27-000-2001-0479-01  
Acumulados Nos. 2000-0428, 2001-0122, 2001-0343  
Actor: GUSTAVO MOYA ÁNGEL Y OTROS  
Acción Popular

|    |                                            |            |                                                                                                                                                                                                                                                                                                                                                                                                                                                                                                                                                                                                                                                                                                                                                             |
|----|--------------------------------------------|------------|-------------------------------------------------------------------------------------------------------------------------------------------------------------------------------------------------------------------------------------------------------------------------------------------------------------------------------------------------------------------------------------------------------------------------------------------------------------------------------------------------------------------------------------------------------------------------------------------------------------------------------------------------------------------------------------------------------------------------------------------------------------|
|    |                                            |            | respectivos planes de manejo ambiental. Racionalizar los usos del agua. Por su parte la Contraloría advierte que se observa falta de coordinación regional se requieren diseños unificados para estandarizar el modelo de la operación -PTAR. La CAR se limitó a construir pero sin unidad de criterio: lagunas de oxidación compactas, PTAR de diversa índole. Continúa el Gobernador: Los planes de acueducto y alcantarillado a nivel municipal tienen problemas de recursos. Se requiere incentivar la presentación de proyectos para continuar con el Plan de Aguas a través de la ventanilla de proyectos. Se podría pensar en la construcción de acueductos regionales. CAR debe participar en la inversión pero no debe intervenir en la operación. |
| 30 | Reunión Dr. Ghunter                        | 7-02-2013  | Propuesta: a través de un modelo de negocio se deben establecer unas actividades con unos indicadores verificables y que permitan hacer un seguimiento que ofrezca múltiples beneficios.                                                                                                                                                                                                                                                                                                                                                                                                                                                                                                                                                                    |
| 31 | Actos preparatorios Pre-congreso Cartagena | 15-02-2013 | Ejes temáticos: agua, basura, biodiversidad y contaminación atmosférica.                                                                                                                                                                                                                                                                                                                                                                                                                                                                                                                                                                                                                                                                                    |
| 32 | Reunión previa Congreso de Cartagena       | 22-02-2013 | Propuestas participantes. EL Ministerio de las TIC refirió:- Los computadores para educar; la aplicación del principio de desarrollo sostenible, el manejo de residuos eléctricos y electrónicos con el apoyo del MEN; residuos peligrosos (necesidad de normativa y su divulgación y aprehensión de conocimiento).<br>Ministerio de Minas: -Seguridad                                                                                                                                                                                                                                                                                                                                                                                                      |

Expediente No. 25000-23-27-000-2001-0479-01  
Acumulados Nos. 2000-0428, 2001-0122, 2001-0343  
Actor: GUSTAVO MOYA ÁNGEL Y OTROS  
Acción Popular

|    |                                                                                                                           |            |                                                                                                                                                                                                                                                                                                                                                                                                                                                                                                                                                                                                                                                                                                                                                                                                                                                                                       |
|----|---------------------------------------------------------------------------------------------------------------------------|------------|---------------------------------------------------------------------------------------------------------------------------------------------------------------------------------------------------------------------------------------------------------------------------------------------------------------------------------------------------------------------------------------------------------------------------------------------------------------------------------------------------------------------------------------------------------------------------------------------------------------------------------------------------------------------------------------------------------------------------------------------------------------------------------------------------------------------------------------------------------------------------------------|
|    |                                                                                                                           |            | <p>jurídica frente a la Ley 685 de 2001 ante el incremento de inversión extranjera; legalización de la minería frente a los grupos ilegales y los grupos de hecho ante la situación de pobreza extrema, capacitación y actividad sostenible; diseñar los mecanismos adecuados para la consulta previa; definir la responsabilidad frente a los pasivos ambientales; lograr coordinar a la autoridad minera y la ambiental pues van por caminos separados, falta comunicación e interacción; un avance es la creación de la oficina ambiental en el Ministerio de Minas y Energía, definir oportunamente las áreas de exclusión.</p> <p>Ministerio de cultura: plantea la necesidad de realizar una labor coordinada con las demás autoridades para la explotación del turismo como actividad económica que a su vez genera empleo, salud, cultura; establecer estímulos fiscales.</p> |
| 33 | CAR, Departamento de Cundinamarca, EMGESA, EAAB, Procuraduría General de la Nación y Contraloría General de la República. | 22-05-2013 | <p>Se discute la solución técnica relacionada con la ubicación de la segunda Planta de Tratamiento de aguas residuales: Canoas-Carboneras o Charquito. Al respecto se destaca la sentencia de primera instancia y los acuerdos posteriores a la misma. La EAAB señala que se ha dado cumplimiento a la sentencia de primera instancia y a los acuerdos suscritos posteriormente con las demás autoridades pero insiste en dejar abierta la decisión en cuanto hace a los ajustes técnicos a través de los</p>                                                                                                                                                                                                                                                                                                                                                                         |

Expediente No. 25000-23-27-000-2001-0479-01  
Acumulados Nos. 2000-0428, 2001-0122, 2001-0343  
Actor: GUSTAVO MOYA ÁNGEL Y OTROS  
Acción Popular

|  |  |                                                                                                                                                                                                                                                                                                                                                                                                                                                                                                                                                                                                                                                                                                                                                                                                                                                                                                                                                                                                                                                                                                                                                                                                                                                                                                                                                                                                                  |
|--|--|------------------------------------------------------------------------------------------------------------------------------------------------------------------------------------------------------------------------------------------------------------------------------------------------------------------------------------------------------------------------------------------------------------------------------------------------------------------------------------------------------------------------------------------------------------------------------------------------------------------------------------------------------------------------------------------------------------------------------------------------------------------------------------------------------------------------------------------------------------------------------------------------------------------------------------------------------------------------------------------------------------------------------------------------------------------------------------------------------------------------------------------------------------------------------------------------------------------------------------------------------------------------------------------------------------------------------------------------------------------------------------------------------------------|
|  |  | <p>respectivos comités técnicos. El Departamento de Cundinamarca estima que la solución técnica ha de ser concertada y tener en cuenta las obras adelantadas para el efecto; propone igualmente revisar los caudales de 14 a 15 m<sup>3</sup>/s y el tratamiento sea el primario químicamente asistido. Paralelamente debe atenderse los planes de saneamiento, unidades sanitarias, control de vertimientos, producción más limpia y manejo y disposición de los residuos sólidos. Destaca la necesidad de concesionar la construcción y manejo del relleno sanitario Nuevo Mondoñedo., con una vida útil superior a 25 años. Advierte además que se requiere de proyectos adicionales de reciclaje en la fuente y compostaje. También llama la atención sobre la operación y administración de los sistemas de tratamiento de aguas residuales de los municipios lo cual podría contar con la cofinanciación del departamento, igualmente deben resolverse problemas sobre gobernanza del agua, monitoreo sobre el río 24 horas, imposición de sanciones, analizar la fuente de los recursos, monto y forma de cobro puesto que las tarifas de las tasas son muy bajas. Igualmente considera importante intervenir la cuenca alta del río Bogotá por el tema de las curtiembres. EMGESA reitera que no contamina sino que se limita a generar energía en cumplimiento de la concesión otorgada. Insiste en</p> |
|--|--|------------------------------------------------------------------------------------------------------------------------------------------------------------------------------------------------------------------------------------------------------------------------------------------------------------------------------------------------------------------------------------------------------------------------------------------------------------------------------------------------------------------------------------------------------------------------------------------------------------------------------------------------------------------------------------------------------------------------------------------------------------------------------------------------------------------------------------------------------------------------------------------------------------------------------------------------------------------------------------------------------------------------------------------------------------------------------------------------------------------------------------------------------------------------------------------------------------------------------------------------------------------------------------------------------------------------------------------------------------------------------------------------------------------|

Expediente No. 25000-23-27-000-2001-0479-01  
Acumulados Nos. 2000-0428, 2001-0122, 2001-0343  
Actor: GUSTAVO MOYA ÁNGEL Y OTROS  
Acción Popular

|  |  |                                                                                                                                                                                                                                                                                                                                                                                                                                                                                                                                                                                                                                                                                                                                                                                                                                                                                                                                                                                                                                                                                                                                                                                                                                                                                                                                                                                                                                                                                               |
|--|--|-----------------------------------------------------------------------------------------------------------------------------------------------------------------------------------------------------------------------------------------------------------------------------------------------------------------------------------------------------------------------------------------------------------------------------------------------------------------------------------------------------------------------------------------------------------------------------------------------------------------------------------------------------------------------------------------------------------------------------------------------------------------------------------------------------------------------------------------------------------------------------------------------------------------------------------------------------------------------------------------------------------------------------------------------------------------------------------------------------------------------------------------------------------------------------------------------------------------------------------------------------------------------------------------------------------------------------------------------------------------------------------------------------------------------------------------------------------------------------------------------|
|  |  | <p>que de continuar con la concesión EMGESA asume el costo de la Estación Elevadora de la Planta de Tratamiento en CANOAS (84 mil millones COP). Destaca el tema de la responsabilidad solidaria cuando la mayor carga contaminante está en Bogotá y por lo tanto la debe asumir la EAAB.</p> <p>La CAR destaca la importancia del río Bogotá el cual debe ser manejado como un sistema único, multipropósito, con responsabilidades sociales y manejo integral. Considera que existe una limitante de orden presupuestal en cuanto a la aplicación de la sobretasa ambiental sólo para la cuenca media pues los recursos deben emplearse para la integralidad de la cuenca. Destaca el cierre financiero para optimizar la PTAR Salitre y la adecuación hidráulica que incluye la compra de predios, zonas de amortiguación y ampliación de la ronda que deberán cubrirse con los excedentes de la sobretasa ambiental de las cuencas alta y baja, por lo que se requiere modificar el alcance de la Ley 1450 porque una vez se satisfaga la cuenca media las otras no van a contar con recursos suficientes. PTAR Salitre tratamiento de 4 a 7m<sup>3</sup>/s y de tratamiento primario a secundario iniciando obras marzo-abril 2014 en un escenario de dos años y medio 2m<sup>3</sup> la Ramada y 5m<sup>3</sup> para el río Bogotá. Se requiere garantizar tratamiento secundario en ambas plantas. Destaca que EMGESA se beneficia de su actividad comercial luego debe contribuir</p> |
|--|--|-----------------------------------------------------------------------------------------------------------------------------------------------------------------------------------------------------------------------------------------------------------------------------------------------------------------------------------------------------------------------------------------------------------------------------------------------------------------------------------------------------------------------------------------------------------------------------------------------------------------------------------------------------------------------------------------------------------------------------------------------------------------------------------------------------------------------------------------------------------------------------------------------------------------------------------------------------------------------------------------------------------------------------------------------------------------------------------------------------------------------------------------------------------------------------------------------------------------------------------------------------------------------------------------------------------------------------------------------------------------------------------------------------------------------------------------------------------------------------------------------|

Expediente No. 25000-23-27-000-2001-0479-01  
Acumulados Nos. 2000-0428, 2001-0122, 2001-0343  
Actor: GUSTAVO MOYA ÁNGEL Y OTROS  
Acción Popular

|    |                                                                     |            |                                                                                                                                                                                                                                                                                                                                                                                                                                                                                                                                                                                                                                                                                                                                                                                                                                                                               |
|----|---------------------------------------------------------------------|------------|-------------------------------------------------------------------------------------------------------------------------------------------------------------------------------------------------------------------------------------------------------------------------------------------------------------------------------------------------------------------------------------------------------------------------------------------------------------------------------------------------------------------------------------------------------------------------------------------------------------------------------------------------------------------------------------------------------------------------------------------------------------------------------------------------------------------------------------------------------------------------------|
|    |                                                                     |            | con la descontaminación. Agrega que los presupuestos de los municipios para 2013, 2014 y 2015 priorizan tratamiento de aguas residuales y su optimización. El Ministerio Público destaca la importancia de hacer un análisis técnico, financiero y jurídico para la solución, realizar un control riguroso a la contaminación e imponer las sanciones a que haya lugar de acuerdo procedimiento establecido, revisar las tarifas de las tasas retributivas y su recaudo; tener en cuenta los temas pedagógicos: capacitación, academia, sensibilización apalancado con el MEN y las autoridades regionales y locales; Comité de verificación tiene un rol determinante con el acompañamiento de los órganos de control. Dados los avances en la tecnología las decisiones en la sentencia no han de ser demasiado rígidas pues pueden surgir nuevas tendencias o tecnologías. |
| 34 | Reunión Ministro de Trabajo                                         | 13-06-2013 | Política del Gobierno frente a las curtiembres, normalización.                                                                                                                                                                                                                                                                                                                                                                                                                                                                                                                                                                                                                                                                                                                                                                                                                |
| 35 | Reunión expertos doctores Costa, Guhl, Carrizosa, Rodas y Rodríguez | 17-07-2013 | Se pregunta dentro de su experiencia que nos debemos proponer? 1.- Acción interinstitucional. Gestión pública y ordenación territorial. 2.- Calidad del agua 3.- Recursos 4.- Responsabilidades. 5.- Gestión territorial. 6.- Gestión del agua tema complejo 7.- Transformación cultural con perspectiva territorial sostenible 8.- Delimitación de la región hídrica. 9.- El problema debe dimensionarse                                                                                                                                                                                                                                                                                                                                                                                                                                                                     |

Expediente No. 25000-23-27-000-2001-0479-01  
Acumulados Nos. 2000-0428, 2001-0122, 2001-0343  
Actor: GUSTAVO MOYA ÁNGEL Y OTROS  
Acción Popular

|  |  |                                                                                                                                                                                                                                                                                                                                                                                                                                                                                                                                                                                                                                                                                                                                                                                                                                                                                                                                                                                                                                                                                                                                                                                                                                                                                                                                                                                                                                          |
|--|--|------------------------------------------------------------------------------------------------------------------------------------------------------------------------------------------------------------------------------------------------------------------------------------------------------------------------------------------------------------------------------------------------------------------------------------------------------------------------------------------------------------------------------------------------------------------------------------------------------------------------------------------------------------------------------------------------------------------------------------------------------------------------------------------------------------------------------------------------------------------------------------------------------------------------------------------------------------------------------------------------------------------------------------------------------------------------------------------------------------------------------------------------------------------------------------------------------------------------------------------------------------------------------------------------------------------------------------------------------------------------------------------------------------------------------------------|
|  |  | <p>integralmente. 10.- Debe haber un cambio conceptual no es la sociedad contra el agua sino el Gobierno del agua, necesidad de articular los instrumentos de planeación para lograr un territorio sostenible. 11.- Se requiere investigación científica y tecnológica para aproximarse al mundo globalizado. 12.- El problema del río en la cuenca baja no se reduce a los olores sino a la contaminación integral de la cuenca por ello, el problema ha de considerarse sistémicamente. 13.- También se trata de un problema de concentración de población. Debe hacerse un llamado para que las políticas que diseña el DNP se acerquen más a la realidad. 14.- El cambio climático genera desplazamiento y concentración hacia la ciudad 15.- Es indispensable modificar las tarifas de las tasas, no pueden atender intereses de índole política, los alcaldes deben concientizarse de esa necesidad. 16.- Debe repartirse la carga de las responsabilidades para la descontaminación, el tema es dinámico, el río Bogotá representa lo que no debe ser una gestión ambiental. 17.- Es importante tener presente la integración de los Comités de verificación. 18.- Se requiere priorización y definición de actividades en el tiempo. 19.- Adoptar decisiones urgentes y rápidas. 20. El problema es dinámico pero la solución tiene el poder de señalar unos caminos. Los parámetros del río Bogotá son diferentes, cada una</p> |
|--|--|------------------------------------------------------------------------------------------------------------------------------------------------------------------------------------------------------------------------------------------------------------------------------------------------------------------------------------------------------------------------------------------------------------------------------------------------------------------------------------------------------------------------------------------------------------------------------------------------------------------------------------------------------------------------------------------------------------------------------------------------------------------------------------------------------------------------------------------------------------------------------------------------------------------------------------------------------------------------------------------------------------------------------------------------------------------------------------------------------------------------------------------------------------------------------------------------------------------------------------------------------------------------------------------------------------------------------------------------------------------------------------------------------------------------------------------|

Expediente No. 25000-23-27-000-2001-0479-01  
Acumulados Nos. 2000-0428, 2001-0122, 2001-0343  
Actor: GUSTAVO MOYA ÁNGEL Y OTROS  
Acción Popular

|  |  |                                                                                                                                                                                                                                                                                                                                                                                                                                                                                                                                                                                                                                                                                                                                                                                                                                                                                                                                                                                                                                                                                                                                                                                                                                                                                                                                                                                       |
|--|--|---------------------------------------------------------------------------------------------------------------------------------------------------------------------------------------------------------------------------------------------------------------------------------------------------------------------------------------------------------------------------------------------------------------------------------------------------------------------------------------------------------------------------------------------------------------------------------------------------------------------------------------------------------------------------------------------------------------------------------------------------------------------------------------------------------------------------------------------------------------------------------------------------------------------------------------------------------------------------------------------------------------------------------------------------------------------------------------------------------------------------------------------------------------------------------------------------------------------------------------------------------------------------------------------------------------------------------------------------------------------------------------|
|  |  | <p>de las cuencas tiene su propia problemática. 21. La Ley Orgánica de Ordenamiento Territorial LOOT prevé la gestión integral de los recursos naturales, espacio interesante para utilizar. Bogotá es un actor poderoso pero no hay flujos de dinero frente al resto de los municipios. La inequidad debe compensarse con fuentes de dinero. 22.- El Dr. Rodas estima que deben hacerse aportes innovadores y en una mesa de trabajo sobre la base de un análisis social, económico y ambiental se articulen unos objetivos, recursos y acciones a mediano y largo plazo. (Modelo Islas del Rosario). El Dr. Carrizosa estima que el río requiere de una gobernanza y una supervisión. Verificaciones técnicas de alto nivel y con el conocimiento más actual posible. El Dr. Manuel Rodríguez Becerra estima fundamental el tema de los recursos. Tener presente los conceptos de integralidad, desarrollo sostenible y descontaminación del río, precisar la ubicación de la PTAR. Por su parte el Dr. Guhl considera tener en cuenta los temas técnicos relacionados con la construcción de la estación elevadora y las obras en curso, proteger lo hecho en obras de infraestructura de colectores y conectores para darle continuidad. Es indispensable la gobernanza del agua: integrar la región sólo con el objeto de gestionar el agua. Se requiere actuar con criterio</p> |
|--|--|---------------------------------------------------------------------------------------------------------------------------------------------------------------------------------------------------------------------------------------------------------------------------------------------------------------------------------------------------------------------------------------------------------------------------------------------------------------------------------------------------------------------------------------------------------------------------------------------------------------------------------------------------------------------------------------------------------------------------------------------------------------------------------------------------------------------------------------------------------------------------------------------------------------------------------------------------------------------------------------------------------------------------------------------------------------------------------------------------------------------------------------------------------------------------------------------------------------------------------------------------------------------------------------------------------------------------------------------------------------------------------------|

Expediente No. 25000-23-27-000-2001-0479-01  
Acumulados Nos. 2000-0428, 2001-0122, 2001-0343  
Actor: GUSTAVO MOYA ÁNGEL Y OTROS  
Acción Popular

|  |  |  |                                                                                                                                                                                                                                                                                                                                                                                                                                                                                                                                                                                                                                                                                                                                                                                                                                                                                                                                                                                                                                                                                                                                                                                                                                                                                                                                                                                 |
|--|--|--|---------------------------------------------------------------------------------------------------------------------------------------------------------------------------------------------------------------------------------------------------------------------------------------------------------------------------------------------------------------------------------------------------------------------------------------------------------------------------------------------------------------------------------------------------------------------------------------------------------------------------------------------------------------------------------------------------------------------------------------------------------------------------------------------------------------------------------------------------------------------------------------------------------------------------------------------------------------------------------------------------------------------------------------------------------------------------------------------------------------------------------------------------------------------------------------------------------------------------------------------------------------------------------------------------------------------------------------------------------------------------------|
|  |  |  | <p>hidrográfico, sistémico y político administrativo. Planificación participativa y concertada entre los actores. Fundamental articular los recursos: instrumentos económicos y financieros, establecer prioridades, realizar planes concertados. La transferencia de recursos debe realizarse de manera equilibrada. Existe un galimatías e incoherencia en los instrumentos de planificación, simplificarlos para lograr instrumentos precisos e integrales que involucren de manera sencilla y clara las determinantes ambientales dentro de un nivel jerárquico POMCA-POT(alcaldes). Frente a los usos del suelo elaborar los planes dentro de la región hídrica. Criterios que garanticen la calidad del agua. Obtener la compensación por los daños ambientales para lograr transferencia de recursos. El Dr. Carrizosa estima que la sentencia debe enviar mensajes importantes: Río Bogotá frente a la política de Población ofrecer alternativas viables a Bogotá, el agua debe repartirse equitativamente, importante la parte pedagógica y el caudal ecológico para el Salto de Tequendama. Dr. Rodas estima que debe tratarse de una labor preventiva, de planificación, de recursos, de control, vigilancia y seguimiento y represiva. (control de vertimientos industriales), se requiere elaborar un censo de la actividad industrial. Participación y apoyo</p> |
|--|--|--|---------------------------------------------------------------------------------------------------------------------------------------------------------------------------------------------------------------------------------------------------------------------------------------------------------------------------------------------------------------------------------------------------------------------------------------------------------------------------------------------------------------------------------------------------------------------------------------------------------------------------------------------------------------------------------------------------------------------------------------------------------------------------------------------------------------------------------------------------------------------------------------------------------------------------------------------------------------------------------------------------------------------------------------------------------------------------------------------------------------------------------------------------------------------------------------------------------------------------------------------------------------------------------------------------------------------------------------------------------------------------------|

Expediente No. 25000-23-27-000-2001-0479-01  
Acumulados Nos. 2000-0428, 2001-0122, 2001-0343  
Actor: GUSTAVO MOYA ÁNGEL Y OTROS  
Acción Popular

|    |                                                      |            |                                                                                                                                                                                                                                                                                                                                                                                                                                                                                                                                                                                                                                                                                                                                                                              |
|----|------------------------------------------------------|------------|------------------------------------------------------------------------------------------------------------------------------------------------------------------------------------------------------------------------------------------------------------------------------------------------------------------------------------------------------------------------------------------------------------------------------------------------------------------------------------------------------------------------------------------------------------------------------------------------------------------------------------------------------------------------------------------------------------------------------------------------------------------------------|
|    |                                                      |            | ciudadano. La propuesta técnica sobre la ubicación de la PTAR debe ser no anclada a una solución exacta porque la tecnología es cambiante, debe adoptarse una solución flexible lo que sí debe prever es la capacidad financiera. Importante la participación comunitaria, los puntos de monitoreo, la responsabilidad social de las empresas privadas en la participación e implementación de un modelo de desarrollo sostenible con obligaciones de compensación, mitigación y restauración. Reutilización de escombros.                                                                                                                                                                                                                                                   |
| 36 | Reunión Ministro de Ambiente y Desarrollo Sostenible | 25-07-2013 | Asume compromiso remitir documentos trabajo curtiembres y demás actividades en la Cuenca.                                                                                                                                                                                                                                                                                                                                                                                                                                                                                                                                                                                                                                                                                    |
| 37 | Reunión visita EPM Medellín                          | 9-08-2013  | Modelo Plan Saneamiento río Medellín, seguimientos mejora e indicadores de gestión. Y Fondo del agua. Se requiere: Plan de convicción e información con el colectivo, ofrecer un producto creíble para que el usuario pague la tarifa por tratarse de un producto muy bueno. Se presenta la geomorfología del Valle de Aburrá, su integración por 10 municipios que comprende área urbana, semiurbana, y rural; cotas, población: 3'500.000 habitantes con una longitud de 100Kms. Desde su nacimiento hasta la desembocadura del río Medellín, 200 afluentes y 250 quebradas adicionales. Solución: construcción redes de alcantarillado y de colectores paralelos al río. Se pretende evitar que las aguas residuales lleguen directamente al río pasando por una PTAR que |

Expediente No. 25000-23-27-000-2001-0479-01  
Acumulados Nos. 2000-0428, 2001-0122, 2001-0343  
Actor: GUSTAVO MOYA ÁNGEL Y OTROS  
Acción Popular

|  |  |  |                                                                                                                                                                                                                                                                                                                                                                                                                                                                                                                                                                                                                                                                                                                                                                                                                                                                                                                                                                                                                                                                                                                                                                                                                                                                                                                                                                                                                        |
|--|--|--|------------------------------------------------------------------------------------------------------------------------------------------------------------------------------------------------------------------------------------------------------------------------------------------------------------------------------------------------------------------------------------------------------------------------------------------------------------------------------------------------------------------------------------------------------------------------------------------------------------------------------------------------------------------------------------------------------------------------------------------------------------------------------------------------------------------------------------------------------------------------------------------------------------------------------------------------------------------------------------------------------------------------------------------------------------------------------------------------------------------------------------------------------------------------------------------------------------------------------------------------------------------------------------------------------------------------------------------------------------------------------------------------------------------------|
|  |  |  | <p>descontamina en un 80% con parámetros de calidad en DBO, materia orgánica, sólidos suspendidos, contenido de oxígeno disuelto.</p> <p>&gt;DBO&gt;Contaminación. La concentración de oxígeno disuelto cercano a "0" es altamente contaminante. Contaminación viable 7.8 de oxígeno concentración de salida 60ml. Remover 160T/día DBO para lograr 5ml/litro oxígeno disuelto, es la meta.</p> <p>Seguimiento: calidad del recurso hídrico. Igualmente se propone manejar el tema de la minería de manera articulada con la secretaría de agricultura; red de monitoreo y definir su responsable. Como beneficios del programa de saneamiento se tienen: uso de las orillas del río con fines urbanísticos, paisajísticos y de actividad industrial. El río no permite contacto directo.</p> <p>Fortalezas: apoyo institucional; continuidad en el plan formulado desde 1983; acompañamiento del BID en la capacitación, manejo financiero jurídico y administrativo lo cual permite continuidad.</p> <p>Metodología: marco lógico; Beneficios adicionales: permite el alumbrado navideño y la construcción de la ciudad del río; seguimiento al PSMV: usuarios, monitoreo, carga orgánica, inversiones, diagnóstico y construcción de redes, longitud de redes construidas. El Banco exige muestreos de los parámetros del caudal, DBO y oxígeno. El valor de los predios aumentó, hubo mejoramiento del espacio</p> |
|--|--|--|------------------------------------------------------------------------------------------------------------------------------------------------------------------------------------------------------------------------------------------------------------------------------------------------------------------------------------------------------------------------------------------------------------------------------------------------------------------------------------------------------------------------------------------------------------------------------------------------------------------------------------------------------------------------------------------------------------------------------------------------------------------------------------------------------------------------------------------------------------------------------------------------------------------------------------------------------------------------------------------------------------------------------------------------------------------------------------------------------------------------------------------------------------------------------------------------------------------------------------------------------------------------------------------------------------------------------------------------------------------------------------------------------------------------|

Expediente No. 25000-23-27-000-2001-0479-01  
Acumulados Nos. 2000-0428, 2001-0122, 2001-0343  
Actor: GUSTAVO MOYA ÁNGEL Y OTROS  
Acción Popular

|    |                             |            |                                                                                                                                                                                                                                                                                                                                                                                                                                                                                                                                                                                                                                                                                                                                                                                                         |
|----|-----------------------------|------------|---------------------------------------------------------------------------------------------------------------------------------------------------------------------------------------------------------------------------------------------------------------------------------------------------------------------------------------------------------------------------------------------------------------------------------------------------------------------------------------------------------------------------------------------------------------------------------------------------------------------------------------------------------------------------------------------------------------------------------------------------------------------------------------------------------|
|    |                             |            | <p>público y si se hace el parque el indicador será muy bueno. Es difícil normalizar los territorios en áreas prohibidas, hay quebradas muy cuidadas pero aun así llegan cargas de aguas residuales. Tarea continua, inversiones fuertes, la construcción de la Planta en Bello con un costo de US\$350 millones incluido en la tarifa a 50 años. Actualización del predial, las tarifas tienen subsidios y el balance se completa con recursos propios de los municipios. La relocalización de personas en la zona de ronda ofrece algún grado de dificultad y se siente el cambio tarifario. Propone como iniciativa el Fondo del Agua para garantizar a largo plazo la calidad del recurso así como lograr alianzas estratégicas público privadas, participación ciudadana y generar conciencia.</p> |
| 38 | Reunión DANE, IGAC e IDEAM. | 15-08-2013 | <p>Indicadores: se pretende revisar una estrategia para mitigar el impacto ambiental en la Cuenca del río Bogotá, para lo cual se debe revisar el POT junto con los usos del suelo; adquirir conciencia y tener una aproximación a los problemas ambientales que sea escalable por fases, defina competencias, indicadores, articular los POTs, una mirada regional que articule el POMCA con los POTs.</p>                                                                                                                                                                                                                                                                                                                                                                                             |
| 39 | Taller 1 Indicadores        | 15-08-2013 | <p>Mapa y componente hidráulico del río, concepción general de saneamiento para el río Bogotá, mediciones, metodología, variables, necesidad de optimizar las estaciones de monitoreo: calidad del agua: hidrológicas y meteorológicas.</p>                                                                                                                                                                                                                                                                                                                                                                                                                                                                                                                                                             |

Expediente No. 25000-23-27-000-2001-0479-01  
Acumulados Nos. 2000-0428, 2001-0122, 2001-0343  
Actor: GUSTAVO MOYA ÁNGEL Y OTROS  
Acción Popular

|    |                                                                                                                    |            |                                                                                                                                                                                                                                                                                                                                                                                                                                                                                                                                                                                                                                                                  |
|----|--------------------------------------------------------------------------------------------------------------------|------------|------------------------------------------------------------------------------------------------------------------------------------------------------------------------------------------------------------------------------------------------------------------------------------------------------------------------------------------------------------------------------------------------------------------------------------------------------------------------------------------------------------------------------------------------------------------------------------------------------------------------------------------------------------------|
|    |                                                                                                                    |            | Estaciones: CAR, DAMA (hoy Secretaría Distrital de Ambiente), IDEAM. Usos del suelo POT: se debe consolidar una información industrial y agrícola a nivel de detalle, escala 1:10.000                                                                                                                                                                                                                                                                                                                                                                                                                                                                            |
| 40 | Reunión CAR Tema: redes<br>1. hidrometeorológicas: manual y satelitales.<br>2. Calidad hídrica manual y automática | 16-08-2013 | 1.- Se requiere mejoramiento de la estructura tecnológica; cuenta con 16 estaciones manuales. Metodología: modelación Universidad Nacional de Colombia (2011); análisis de metales pesados y nutrientes. Hoy se comparte la red con el IDEAM y puede ser consultada en la WEB. Convenio CAR-Instituto Humboldt y el MADS. La Doctora Ana Elvia Ochoa -CAR, considera necesario: ajustar POMCA (recursos Ministerio), trabajo cartográfico zonificación ambiental para lograr estudio a una escala de predios para poder articular el POT; articular recursos; evaluaciones regionales del agua: sistema unificado del recurso hídrico: oferta, demanda, calidad. |
| 41 | Reunión Fundación, tema Fondos de Agua                                                                             | 21-08-2013 | Manejo del sistema hídrico; lateralidad, conectividad, concepto de regionalización; necesidad de caudal ecológico, manejo de tributarios. El fondo pretende resolver el comportamiento del río frente a la contaminación: cantidad y calidad del agua, para ello se requiere de un mecanismo Técnico y Financiero, para disminuir el riesgo a mediano y largo plazo. Los recursos y las acciones se encuentran dispersas, falta de gobernabilidad para la gestión del recurso hídrico, ausencia de apoyo estratégico, plan de                                                                                                                                    |

Expediente No. 25000-23-27-000-2001-0479-01  
Acumulados Nos. 2000-0428, 2001-0122, 2001-0343  
Actor: GUSTAVO MOYA ÁNGEL Y OTROS  
Acción Popular

|    |                     |            |                                                                                                                                                                                                                                                                                                                                                                                                                                                                                                                                                                                                                                        |
|----|---------------------|------------|----------------------------------------------------------------------------------------------------------------------------------------------------------------------------------------------------------------------------------------------------------------------------------------------------------------------------------------------------------------------------------------------------------------------------------------------------------------------------------------------------------------------------------------------------------------------------------------------------------------------------------------|
|    |                     |            | financiamiento, priorización pago de servicios ambientales, tasas retributivas, etc. Con un plan a diez años financiado con el 1% art. 111 Ley 99 de 1993, se podrá adquirir predios, construir bocatomas y recuperar bosques.                                                                                                                                                                                                                                                                                                                                                                                                         |
| 42 | Reunión Taller IGAC | 21-08-2013 | Monitoreo, indicadores, unificar el lenguaje de la estrategia, balance hídrico acorde con oferta, demanda, calidad y riesgo, medición: indicadores: aridez, regulación hídrica, uso, calidad, (Decreto 1640/12) último estudio 2010. DBO, OD y metales pesados. El informe de 2012 consolidó estos datos (pendiente de publicar). Inclusión PSMV (Decreto 3930) Priorizar oficinas en la cuenca y adoptar un plan de choque para adoptar decisiones de fondo. Conocer el problema para definir las estrategias y acciones, presupuesto.                                                                                                |
| 43 | Reunión Car         | 28-08-2013 | Plantea sus preocupaciones en torno a: Ampliación de la PTAR Salitre, crédito restringe la capacidad económica de la CAR para los próximos doce años; construcción de las PTARs, meta que todos los municipios tengan tratamiento de aguas residuales; falta de presencia del Gobierno Nacional con el argumento de que no hay plata. Soacha presenta un incremento poblacional y de vivienda y no hay dinero para colectores se espera entonces la construcción de la PTAR Canoas y no hacer PTAR pequeña. Los sistemas de tratamiento no están contemplados en los proyectos de vivienda y de urbanismo. Falta de apoyo del Gobierno |

Expediente No. 25000-23-27-000-2001-0479-01  
Acumulados Nos. 2000-0428, 2001-0122, 2001-0343  
Actor: GUSTAVO MOYA ÁNGEL Y OTROS  
Acción Popular

|  |  |  |                                                                                                                                                                                                                                                                                                                                                                                                                                                                                                                                                                                                                                                                                                                                                                                                                                                                                                                                                                                                                                                                                                                                                                                                                                                                                                                                                                                              |
|--|--|--|----------------------------------------------------------------------------------------------------------------------------------------------------------------------------------------------------------------------------------------------------------------------------------------------------------------------------------------------------------------------------------------------------------------------------------------------------------------------------------------------------------------------------------------------------------------------------------------------------------------------------------------------------------------------------------------------------------------------------------------------------------------------------------------------------------------------------------------------------------------------------------------------------------------------------------------------------------------------------------------------------------------------------------------------------------------------------------------------------------------------------------------------------------------------------------------------------------------------------------------------------------------------------------------------------------------------------------------------------------------------------------------------|
|  |  |  | <p>Nacional en la recuperación del río, el Ministerio no ha acompañado las inversiones en el Sistema de Tratamiento; se requiere implementar un esquema serio de pago por servicios ambientales que garantice la sostenibilidad del río en cuanto a la cantidad (oferta) del recurso. Decreto 953/13 contempla el pago por servicios vinculado a otros proyectos como el de entregar el incentivo por hectáreas lo cual resulta más económico frente a la oferta hídrica. Desarrollar actividades de conservación y protección. Zonas de recarga hídrica inferiores al límite. Como el Estado no está en capacidad de administrar se requiere que las personas contribuyan con el mantenimiento y pago por servicios. Reutilización del agua y parque industrial lote Chingativa para su construcción en línea de crédito con BANCOLDEX con apoyo del Ministerio de Desarrollo y el Departamento; Programa de Producción más limpia sólo con legales, judicializar las curtiembres ilegales, ordenamiento territorial es determinante. Se requiere de una creación colectiva con herramientas y presupuesto, indicadores y monitoreo: CAR-IDEAM-DANE. También debe buscarse un sistema sancionatorio ágil, la Ley 1333 establece unos mecanismos complejos y para usuarios desarrollados no para el campesino; servicio militar ambiental obligatorio útil para el apoyo en el campo con</p> |
|--|--|--|----------------------------------------------------------------------------------------------------------------------------------------------------------------------------------------------------------------------------------------------------------------------------------------------------------------------------------------------------------------------------------------------------------------------------------------------------------------------------------------------------------------------------------------------------------------------------------------------------------------------------------------------------------------------------------------------------------------------------------------------------------------------------------------------------------------------------------------------------------------------------------------------------------------------------------------------------------------------------------------------------------------------------------------------------------------------------------------------------------------------------------------------------------------------------------------------------------------------------------------------------------------------------------------------------------------------------------------------------------------------------------------------|

Expediente No. 25000-23-27-000-2001-0479-01  
Acumulados Nos. 2000-0428, 2001-0122, 2001-0343  
Actor: GUSTAVO MOYA ÁNGEL Y OTROS  
Acción Popular

|    |                                              |           |                                                                                                                                                                                                                                                                                                                                                                                                                                                                                                                                                                                                                                                                                                                                                                                                                                                                                                                                                                                                                                                                                                                                                                                    |
|----|----------------------------------------------|-----------|------------------------------------------------------------------------------------------------------------------------------------------------------------------------------------------------------------------------------------------------------------------------------------------------------------------------------------------------------------------------------------------------------------------------------------------------------------------------------------------------------------------------------------------------------------------------------------------------------------------------------------------------------------------------------------------------------------------------------------------------------------------------------------------------------------------------------------------------------------------------------------------------------------------------------------------------------------------------------------------------------------------------------------------------------------------------------------------------------------------------------------------------------------------------------------|
|    |                                              |           | capacitación previa de la autoridad ambiental. Debe invertirse en saneamiento para disminuir tasa retributiva; adopción medidas pago de la tasa por quienes usan el agua de manera ilegal.                                                                                                                                                                                                                                                                                                                                                                                                                                                                                                                                                                                                                                                                                                                                                                                                                                                                                                                                                                                         |
| 44 | Reunión Taller 3 IDEAM-DANE-IGAC indicadores | 2-09-2013 | Predios revisar escalas y catastro; red de monitoreo; legitimar visión sistémica; soluciones: ingenieril para los problemas del cauce; no se cuenta con información estandarizada ni sistematizada; elementos conceptuales: guía POMCA; mapa como unidad de análisis: área, zona y subzona.; microcuencas, sistemas acuíferos. En el 2009 se establecieron indicadores nacionales; ajuste del marco metodológico: cantidad y calidad; oferta, demanda y riesgo; replanteamiento de indicadores, el estudio hace una lectura nacional no regional. Si se abordara el problema de la calidad se resolvería el 80% del problema. En desarrollo del Decreto 1640 de 2012 se concertó y trabajó con las autoridades ambientales el centro piloto: Bogotá, CAR,FOPAE y la EAAB. La CAR contrató un equipo de trabajo con un marco conceptual y metodológico pendiente de publicar con un enfoque sistémico y visión integral. Advierte que los POMCA no están diseñados para levantar una línea base, resulta fundamental aplicar los estudios efectuados para ser utilizados e implementados por las autoridades ambientales. Incluye el riesgo. Se requiere de una base de información |

Expediente No. 25000-23-27-000-2001-0479-01  
Acumulados Nos. 2000-0428, 2001-0122, 2001-0343  
Actor: GUSTAVO MOYA ÁNGEL Y OTROS  
Acción Popular

|    |                                                                                                                                               |            |                                                                                                                                                                                                                                                                                                                                                                                                                                                                                                                                                                                                                                                                                                                                                                                                                                                                                                                                                                                                   |
|----|-----------------------------------------------------------------------------------------------------------------------------------------------|------------|---------------------------------------------------------------------------------------------------------------------------------------------------------------------------------------------------------------------------------------------------------------------------------------------------------------------------------------------------------------------------------------------------------------------------------------------------------------------------------------------------------------------------------------------------------------------------------------------------------------------------------------------------------------------------------------------------------------------------------------------------------------------------------------------------------------------------------------------------------------------------------------------------------------------------------------------------------------------------------------------------|
|    |                                                                                                                                               |            | oficial con cartografía, censos efectuados por el DANE; fortalecimiento regional, indicadores con enfoque sistémico; unificar estándares y metodologías IGAC-DANE-IDEAM y que el lenguaje se adopte por la CAR para lograr un lenguaje, normatividad e información únicos y un proceso ordenado que incluye la gestión del conocimiento, la gestión del riesgo: adaptación al cambio climático.                                                                                                                                                                                                                                                                                                                                                                                                                                                                                                                                                                                                   |
| 45 | Reunión Taller IGAC<br>Propuesta operatividad (indicadores); empoderar, articular, establecer subsistemas, dolientes (salud y usos del suelo) | 11-09-2013 | Ámbito de aplicación: autoridad ambiental, debe conocer su jurisdicción: Unidades de análisis: a nivel de áreas hidrográficas, y de aguas subterráneas. Macro cuenca Decreto 1640, que deben ser objeto de planes estratégicos: Gobernanza del agua: nivel objeto de instrumentación y monitoreo: zona hidrográfica; cuenca objeto de ordenación y manejo POMCA, sistema de información; estrategia de implementación se requiere de un grupo mínimo que trabaje en el tema: hidrólogo, hidrogeólogo, economista, ingeniero de sistemas, químico. Se requiere definir estrategia de personal a tres años; una plataforma técnica para el sistema de información, protocolos, estándares, red de monitoreo; fortalecimiento institucional (equipos, gente y recursos); necesidad de contar con inventarios; mapeo con restricciones de uso y un sistema de información del recurso hídrico- Planificación del territorio (Intervención) se requiere un acompañamiento educativo y de difusión. Ley |

Expediente No. 25000-23-27-000-2001-0479-01  
Acumulados Nos. 2000-0428, 2001-0122, 2001-0343  
Actor: GUSTAVO MOYA ÁNGEL Y OTROS  
Acción Popular

|    |                                                                                                                                                                                         |            |                                                                                                                                                                                                                                                                                                                                                                                                                                                                                                                                             |
|----|-----------------------------------------------------------------------------------------------------------------------------------------------------------------------------------------|------------|---------------------------------------------------------------------------------------------------------------------------------------------------------------------------------------------------------------------------------------------------------------------------------------------------------------------------------------------------------------------------------------------------------------------------------------------------------------------------------------------------------------------------------------------|
|    |                                                                                                                                                                                         |            | 388 y LOOT. Identificación de ejes temáticos.                                                                                                                                                                                                                                                                                                                                                                                                                                                                                               |
| 46 | Reunión Sentencia río Matanza Riachuelo Argentina Dr. Fernando Reynoso, Dr. Cano Proyecto del río y Dr. Carlos Alberto Uribe del Banco Mundial en Colombia Intercambio de experiencias. | 25-09-2013 | 1.- Componentes: Obras de saneamiento; control de la contaminación industrial y reconversión industrial; ordenamiento territorial control y manejo de inundaciones; fortalecimiento institucional: Autoridad de Cuenca.<br>Ejes problemáticos: Contaminación: cloacal, industrial y urbana; indicadores y seguimiento. Ordena a ACUMAR establecer los indicadores con un cambio cultural de la población. Línea base: diagnóstico, información sistematizada, empadronamiento, inspección y verificación, monitoreo, agentes contaminantes. |
| 47 | Reunión Secretaría Distrital de Ambiente                                                                                                                                                | 25-09-2013 | Convenio 171/07, tiene por tarea hacer trabajo en la ciudad en los ríos Torca, Fucha y Tunjuelo; sistema de alcantarillado: requiere separar el pluvial del residual; PSMV, etapa final modificación 2013; índices de calidad, red de control y monitoreo. Programas de gestión ambiental, cambios a tecnologías limpias, programa de excelencia ambiental, educción ambiental; desarrollar el concepto de ciudad región, unificar normativa.                                                                                               |
| 48 | Reunión Taller IGAC                                                                                                                                                                     | 26-09-2013 | Planificación de detalle y asignar flujo de información, autoridad de cuenca Ej. CORMAGDALENA.                                                                                                                                                                                                                                                                                                                                                                                                                                              |
| 49 | Reunión Gobernación de Cundinamarca                                                                                                                                                     | 12-10-2013 | Socialización Gerencia de Cuenca                                                                                                                                                                                                                                                                                                                                                                                                                                                                                                            |
| 50 | Reunión Secretaría Distrital de Ambiente                                                                                                                                                | 10-02-2014 | Socialización Gerencia de Cuenca                                                                                                                                                                                                                                                                                                                                                                                                                                                                                                            |
| 51 | Reunión EAAB, CAR y SDA                                                                                                                                                                 | 17-02-     | Socialización Gerencia de                                                                                                                                                                                                                                                                                                                                                                                                                                                                                                                   |

Expediente No. 25000-23-27-000-2001-0479-01  
Acumulados Nos. 2000-0428, 2001-0122, 2001-0343  
Actor: GUSTAVO MOYA ÁNGEL Y OTROS  
Acción Popular

|    |                                                  |          |                                                                                                                                                                                                                                                                                                             |
|----|--------------------------------------------------|----------|-------------------------------------------------------------------------------------------------------------------------------------------------------------------------------------------------------------------------------------------------------------------------------------------------------------|
|    |                                                  | 2014     | Cuenca. Las partes convocadas dada la importancia de la providencia decidieron realizar jornadas de trabajo en aras de estructurar una gerencia de cuenca, la cual presentaran a la Corporación antes de proferir sentencia. Se trata de un tema organizacional que requiere de una construcción colectiva. |
| 52 | Reunión Departamento Nacional de Planeación DNP. | 5-3-2014 | Actualización información avances Proyectos río Bogotá.- Seguimiento Acuerdo 21 de febrero de 2011. (matriz de seguimiento - componentes de saneamiento río Bogotá y asignación de recursos a proyectos "conservación y descontaminación del río Bogotá").                                                  |
