# Supplementary material
Source: publisher figshare collection journal article supplement (https://tandf.figshare.com/articles/dataset/_/10732607)
Supplement: Supplementary file 1 [file 2 › fjds_a_1690134_sm1436.pdf]

## Appendix B: Newspapers

Conexión Capital. (2019, May 4). *El río Bogotá hoy ya es navegable.*

El Espectador. (2012, November 12). *La pelea por descontaminar el río Bogotá.*

El Espectador. (2016, October 16). *Sellan empresas que contaminan el agua en Bogotá.*

El Herald. (2013, August 11). *¿Quién ve por las veedurías ciudadanas?*

El Tiempo. (1996, January 15). *Embalse del Muña asfixia a Sibaté.*

El Tiempo. (2011, July 8). *Marchas frente a la Corte.*

El Tiempo. (2012, May 10). *Corte exige a Gobierno control sobre “mercaderes de la salud.”*

El Tiempo. (2018, November 18). *Por contaminar el río Bogotá, sellan 23 curtiembres.*

El Tiempo. (2019a, January 4). *10 años después, tutelas en salud siguen creciendo en vez de reducirse.*

El Tiempo. (2019b, March 31). *Banco Mundial destaca avances de obras en el río Bogotá.*

El Tiempo. (2019c, May 17). *Con drones y cámaras vigilan el río Bogotá las 24 horas.*

Semana. (2011a, July 7). *Medidas para enfrentar el problema del sector salud son paliativas: Corte Constitucional.*

Semana. (2011b, August 14). *Sector salud no pasó exámen de la Corte Constitucional.*

Semana. (2011c, December 5). *Nuevo Plan Obligatorio de Salud regirá a partir de enero.*

Semana. (2012b, May 7). *Unificación del POS le pone fin a la discriminación en la salud, dice Santos.*

Semana. (2012a, July 3). *Conozca los cambios en el Plan Obligatorio de Salud.*

Semana. (2015, February 16). *Santos firma ley para garantizar acceso a servicios de salud.*

Semana. (2018, October 26). *Destapan cáncer de corrupción en la Superintendencia de Salud.*

# El río Bogotá hoy ya es navegable

4 mayo, 2019

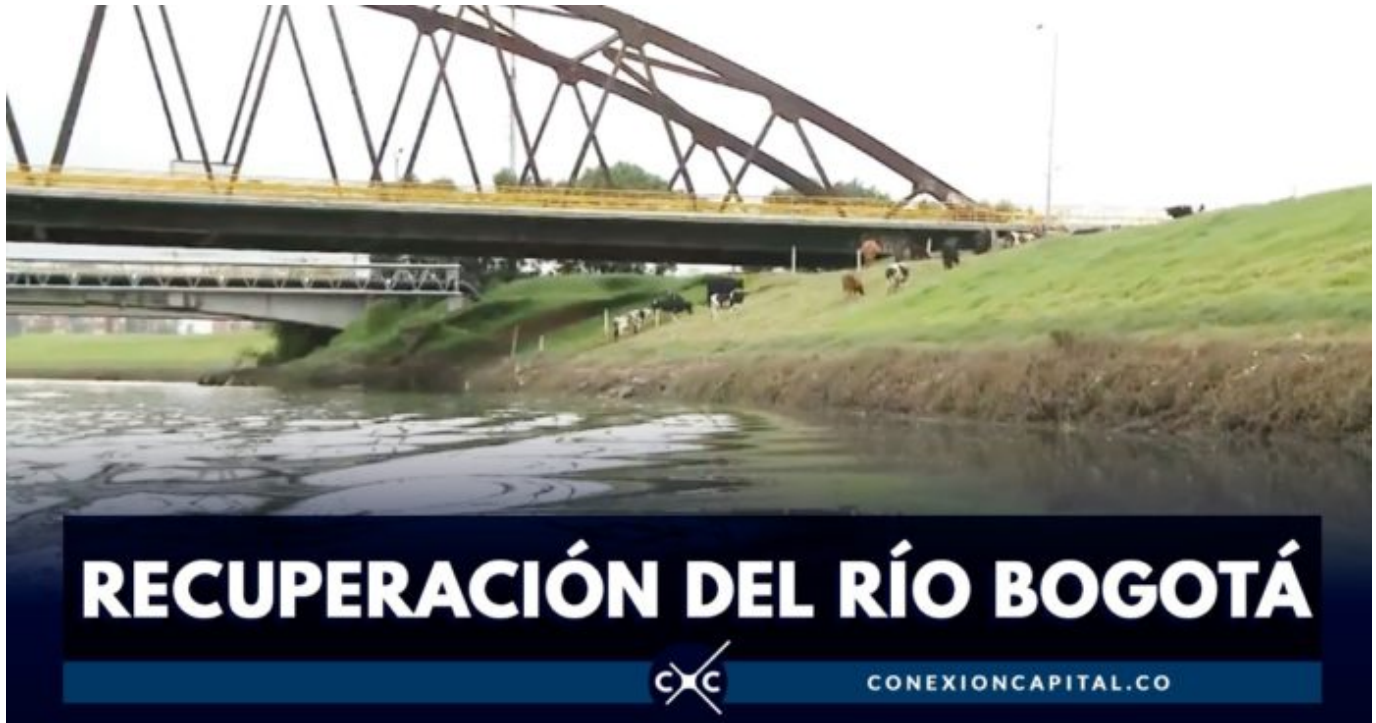

La CAR Cundinamarca anunció los avances de recuperación del río Bogotá que son casi de un 70 % a la fecha. Con un recorrido sobre esta cuenca hídrica se comprobó que es navegable. También, se anunció la construcción de senderos peatonales y muelles para que en un futuro las familias puedan disfrutarlo.

El recorrido se hizo en lancha por un tramo del río Bogotá sobre la calle 80, exactamente donde se descargan las aguas del humedal Juan Amarillo y de la planta de tratamiento de aguas residuales, de la zona norte de la capital.

Este es el panorama, la contaminación que genera las aguas turbias y densas ha disminuido, sin embargo, todavía se pueden apreciar desechos como muebles y colchones en la ruta del río.

Néstor Franco, director de la CAR Cundinamarca, aseguró que: "comparado al horizonte que teníamos hace 10 años, tenemos un río sustancialmente diferente, confiamos que

la puesta en marcha de la planta de tratamiento del Salitre sea un gran aporte a esta descontaminación, pero, en general, de uno a cien, tenemos unos avances de obra del 70 % del río Bogotá".

En un año iniciaría la operación total de la PTAR Salitre que tratará las aguas del norte de Bogotá.

"Tenemos un avance de obra del 60, 65 por ciento, ya comenzaron a llegar equipos, la idea es que para diciembre tengamos línea de agua en pruebas y la línea de lodos durante el año entrante", argumentó Franco.

Recuerde que usted también hace parte de esta recuperación.

Marta Carrillo Silva, directora de Cultura ambiental y servicio al ciudadano de la CAR, manifestó que dejar de consumir cosas que no necesitamos y ser selectivos buscando aquellos productos que son amigables con el medio ambiente y que que no generan excesos en empaque, ayudarían a la causa.

La CAR en el 2017 logró la adecuación hidráulica de la cuenca media, se retiraron ocho millones de toneladas de basuras del río Bogotá, que, según los pronósticos, estaría totalmente descontaminado en 7 años.

Por: Diana Alvarado

Location: [HTTP://www.elespectador.com/noticias/temadeldia/pelea-descontaminar-el-rio-bogota-articulo-386607](http://www.elespectador.com/noticias/temadeldia/pelea-descontaminar-el-rio-bogota-articulo-386607)

Last accessed October 2, 2019

# La pelea por descontaminar el río Bogotá

[Tema del día](#)

12 Nov 2012 - 9:00 PM

Diana Carolina Cantillo

**Antes de una decisión de fondo del Consejo de Estado, se debe dirimir el pleito jurídico entre Emgesa y el Acueducto.**

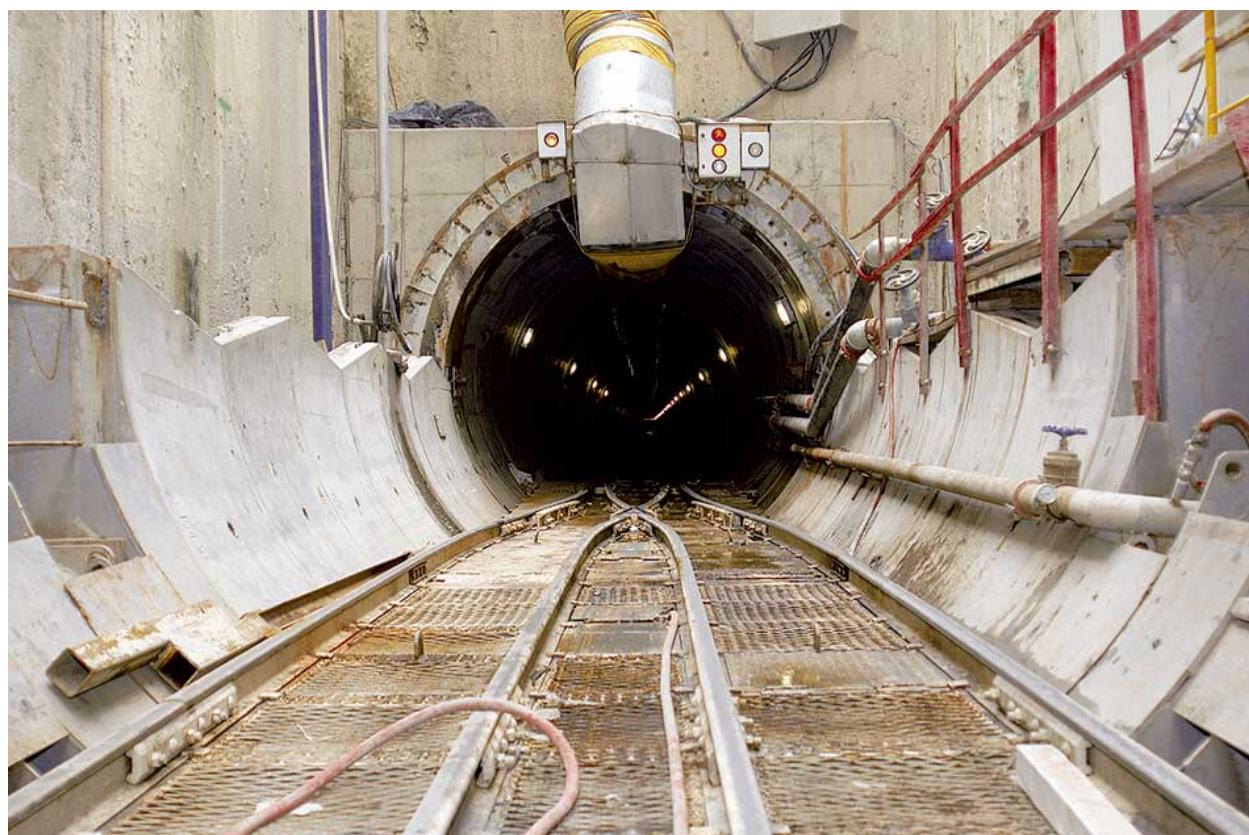

Esta es una de las obras a cargo del Acueducto de Bogotá en el plan de saneamiento del río: el interceptor Fucha-TunjueloCortesía

Hace 20 años, con el propósito de reparar los daños causados al municipio de Sibaté (Cundinamarca) por la contaminación de las aguas del río Bogotá y del embalse del Muña, un grupo de ciudadanos presentó una acción popular que en 2004 puso a Bogotá, a 42

municipios de Cundinamarca, al departamento y a varias entidades públicas y privadas a proveer soluciones definitivas a un dilema ecológico y social de toda la región. Esta semana, con una audiencia pública en el

Consejo de Estado, se comienza a despejar el horizonte de este multimillonario pleito, que ya evalúan los organismos de control.

Sin embargo, esta historia de nunca acabar se remonta a por lo menos 50 años atrás, porque se origina en el problema creciente y crítico de la contaminación del río Bogotá. Desde 1962 hasta la fecha en que se interpuso la acción popular se contrataron y realizaron más de 20 estudios para la limpieza de esta cuenca hídrica. Todos los gobiernos y alcaldías gastaron dinero en planes que nunca se concretaron por falta de recursos. Hasta que la Constitución de 1991 creó la acción popular y fueron los ciudadanos quienes marcaron la diferencia.

Aunque el Tribunal Administrativo de Cundinamarca se tomó el asunto en serio y puso a entidades públicas y privadas a dar explicaciones para fijar responsabilidades en la contaminación del río Bogotá, sólo en agosto de 2004, es decir, 12 años después de interpuesta la demanda, emitió su fallo. En ese momento se hizo justicia. Por acción y por omisión, todos los habitantes e industrias que habían realizado vertimientos en el río quedaron comprometidos a aportar a la solución. Pero fue mayor la obligación para las entidades públicas.

Los ministerios, la CAR, las empresas de servicios públicos y otras dependencias quedaron conminados a constituir una Mesa de Solución Técnica Integral para la descontaminación del río Bogotá. Y dentro de las acciones a seguir, además de imponer la ampliación de la planta de tratamiento del Salitre, ordenó construir varios interceptores en la cuenca media del río para atenuar la contaminación. El principal de ellos, denominado Tunjuelo-Canoas, era clave para mitigar el desastre ambiental del río a su paso por Bogotá.

No en vano las autoridades ambientales ya tenían diagnosticado que aunque el río Bogotá en su recorrido desde Villapinzón hasta Girardot, donde tributa sus aguas al río Magdalena, drena las aguas de 6.000 kilómetros cuadrados, donde habitan más de ocho millones de personas, incluyendo el Distrito Capital, es Bogotá el principal promotor de la contaminación. A lo largo de la cuenca del río habita el 19% de la población del país y se genera el 26% de la actividad económica nacional. Pero es la capital de la República el dilema mayor.

Por eso, el interceptor Tunjuelo-Canoas, una obra de ingeniería para canalizar las aguas del río a la altura del municipio de Soacha para llevarlas a una planta de tratamiento y después devolverlas a la cuenca descontaminadas, significaba la obra fundamental, según la orden del Tribunal de Cundinamarca. Lo que no estaba previsto es que en el país de los abogados, todos los involucrados iban a apelar la decisión. Desde entonces han transcurrido ocho años más de recursos y alegatos y la cloaca del río Bogotá sigue causando estragos.

En su momento, como respuesta directa a la sentencia judicial, el Departamento Nacional de Planeación (DNP) expidió un documento Conpes donde trazó un plan de acción con proyecciones económicas, fuentes de financiación y detalles técnicos. El diagnóstico dejó claro en el asunto específico de la planta de tratamiento y el interceptor Tunjuelo-Canoas que la obra debía estar lista antes de 2009. En consecuencia, en los sucesivos meses, entidades públicas y privadas empezaron a firmar convenios para cumplir el objetivo.

Pero a pesar de los acuerdos de cooperación entre la Empresa de Acueducto de Bogotá, el Distrito, la Gobernación de Cundinamarca, el Ministerio del Medio Ambiente y la CAR, entre otros organismos, el tiempo siguió pasando y la obra esencial sin los avances necesarios. La razón: los dilemas económicos y técnicos alrededor de la ubicación de la planta de tratamiento y su financiación. Una pelea que obligó al Consejo de Estado a aplazar una decisión de fondo en la acción popular, y al magistrado ponente, Marco Antonio Velilla, a volverse prácticamente ingeniero.

En el camino se atravesó la contralora general, Sandra Morelli, quien en abril de 2011 expidió una función de advertencia para manifestar que el programa de saneamiento del río Bogotá, ya en marcha, no tenía soporte financiero, presupuestal, técnico y legal suficiente. Además, advirtió que la construcción, operación y mantenimiento de una estación de bombeo en Canoas (Soacha), anexa a la planta de tratamiento ordenada por el Tribunal de Cundinamarca, estimada en US\$81 millones, podía causar afectación a los recursos públicos.

Dos meses después, a través de un informe de auditoría conjunta, la propia contralora Morelli, en asocio con los contralores de Cundinamarca, Bogotá y Soacha, diagnosticaron con precisión los errores en que se estaba incurriendo para la realización de los trabajos del programa de descontaminación del río Bogotá. Hasta ese momento, como quedó formalizado semanas más tarde a través de un convenio interinstitucional de apoyo, la firma Emgesa S.A. y la Empresa de Acueducto de Bogotá compartían criterios técnicos en la obra.

Sin embargo, con el cambio de gobierno en el Distrito Capital, esta unidad de puntos de vista respecto al interceptor Tunjuelo-Canoas y sus obras anexas se fue al traste. La diferencia quedó planteada en términos específicos. La Empresa de Acueducto no vio reparos en canalizar las aguas del río Bogotá desde Tunjuelo, pero observó que la planta de tratamiento podía resultar más económica en el sector de El Charquito, aguas abajo de Canoas, pero que de hacerse en este último lugar, no consideraba viable otra obra incluida en el convenio.

Se refería a la estación de bombeo añadida a la planta de tratamiento de Canoas, que le garantiza a Emgesa la posibilidad de fortalecer su negocio de generadora de energía. Y ese fue precisamente el desacuerdo de la Empresa de Acueducto, sintetizado en un argumento: no hay oposición a hacer la planta de tratamiento de aguas contaminadas del río Bogotá en Tunjuelo, Canoas o El Charquito, pero la entidad distrital no tiene por qué invertir dineros públicos e incluso aumentar tarifas (6,4% ) a los ciudadanos para ayudarle a Emgesa.

El otro lío que se armó llegó por cuenta de algunas modificaciones en el trazado original de las obras por parte del Acueducto. Con la justificación de que tuvo que hacerlo por la calidad de los suelos y porque había problemas de propiedad de predios, en efecto, la entidad distrital reubicó uno de los pozos, el ITC12, justamente en el sector donde estaba previsto construir la planta de bombeo. Además, con la variación de la obra se hizo necesario ampliar el tramo de la canalización con los debidos sobre costos para la multimillonaria obra.

La pugna técnica obligó al consejero ponente, Marco Antonio Velilla, a aplazar su decisión de fondo y, como medida cautelar, suspender la obra Tunjuelo-Canoas. A través de una decisión adoptada el 26 de julio de 2012, el jurista dispuso que hasta tanto no se aclararan los aspectos dudosos en cuanto a los diseños, ubicación, especificaciones técnicas, financieras y ambientales de la obra, y en general al proceso mismo de contratación, no era posible darle vía libre al principal objeto de la controversia planteada en la acción popular.

Esta intervención suscitó un nuevo pulso jurídico. Emgesa apoyó la medida acusando al Acueducto de improvisación, cambios sobre la marcha y desconocimiento de un trabajo conjunto a lo largo de los años, incluyendo la planta de bombeo en Canoas. El Distrito, a través del Departamento Administrativo del Medio Ambiente (DAMA), le pidió al consejero levantar la medida para no dilatar más el tratamiento de las aguas del río. En otras palabras, así mediara un buen propósito, pidió evitar más perjuicios al interés público.

La Empresa de Acueducto de Bogotá precisó que paralizar la obra causaba un enorme perjuicio, entre otros aspectos porque el túnel de emergencia estaba terminado y apenas faltaban algunos centenares de metros para concluir el interceptor. Además, precisó que detener la obra era permitir que dos tuneladoras quedaran enterradas a cerca de 63 y 69 metros de profundidad. La Empresa recordó que ya la obra estaba dando beneficios, como la opción de evacuar aguas lluvias al occidente de Bogotá en tiempos de crudo invierno.

El consejero Marco Antonio Velilla decidió tomar cartas en el asunto y además de revisar toda la documentación del caso, adelantó una inspección judicial. Primero concluyó que el Acueducto, en consentimiento con el contratista, eliminó el pozo de la discordia, es decir el ITC-12, aprobado en el sector de Canoas. Lo hizo por falta de titularidad del predio, reubicando la obra en el lote Invías. Sin embargo, detectó también que este segundo predio no ha sido entregado, situación que debe ser remediada de inmediato.

Tras aceptar que estaban aclarados los aspectos dudosos de la obra, y con el propósito de evitar más dilaciones al plan de descontaminación del río, el pasado lunes 29 de octubre el consejero Velilla levantó la medida cautelar, ordenó la entrega inmediata del predio Invías y les dio 10 días a los contratistas para aportar una solución de mínimo costo para el tema del pozo ITC-12, así como para la extracción de las máquinas situadas a 63 y 69 metros de profundidad. Velilla agregó que todas las partes interesadas debían ser notificadas.

Según conoció El Espectador, el objetivo del Consejo de Estado es concluyente: mañana 14 de noviembre debe realizarse una audiencia pública final sobre los objetivos de la acción popular y después de los alegatos de la partes, en breve tiempo, debe darse una sentencia. Después de dos décadas de contrapunteo judicial, con igual extensión de tiempo constatando como el río Bogotá sigue arrastrando desperdicios y contaminación a través de su cuenca, el reclamo de varios ciudadanos está a punto de obtener una adecuada respuesta del Estado.

### **Los responsables de la contaminación del río**

Más de 1.000 toneladas de residuos sólidos y materia orgánica, que a diario vierten 42 municipios ribereños y la capital del país, han contaminado el río Bogotá con metales pesados y bacterias como coliformes totales y fecales.

El río nace en el municipio de Villapinzón y desemboca en el río Magdalena, en Girardot. Veinte mil colombianos lo utilizan para el desarrollo de actividades productivas

(mataderos, producciones de papa, pasteurizadoras y curtiembres) y actividades humanas (condominios, colegios, cárceles y urbanizaciones).

Los responsables de la contaminación del río Bogotá, por acción u omisión son los ministerios de Medio Ambiente, de Minas y de Agricultura. Otros son las CAR, la capital del país, la Empresa de Acueducto de Bogotá, la Empresa de Energía de Bogotá, el departamento de Cundinamarca y los 42 municipios, además de industrias y empresas privadas.

### **El lío de las máquinas tuneladoras**

Una cosa es que las obras del interceptor Tunjuelo-Canoas y la del túnel de emergencia hayan sido suspendidas por el Consejo de Estado por considerar dudosa su ejecución y contratación (agosto de 2012), lo cual genera pérdidas económicas que no se han cuantificado oficialmente. Y otra muy diferente es el lucro cesante que se le ha originado al consorcio Oderbrech-Cass, encargado de la ejecución de las obras, por tener, desde el 10 de julio de 2011, una máquina tuneladora enterrada a 63 metros de profundidad. De acuerdo con el contratista, la tuneladora se encuentra atrapada debido a que la Empresa de Acueducto no tuvo el predio por donde se debía sacar dicha máquina en la fecha establecida en el cronograma de obras. Según cuentas del consorcio, el sobrecosto está cerca de los \$8.000 millones, cifra que surge después de sumar la inversión, el mantenimiento bajo tierra y el costo de los equipos auxiliares que no permiten que la máquina quede sepultada, esto sin sumar el dinero perdido por el lucro cesante.

Location: <https://www.elespectador.com/noticias/bogota/sellan-empresas-contaminan-el-agua-bogota-articulo-660731>

Last accessed October 2, 2019

## Sellan empresas que contaminan el agua en Bogotá

[Bogotá](#)

16 Oct 2016 - 3:23 PM

Redacción Bogotá

**En la última semana se han clausurado 14 empresas que arrojaban residuos a las red hídrica de la ciudad, sin cumplir con los requisitos ambientales exigidos.**

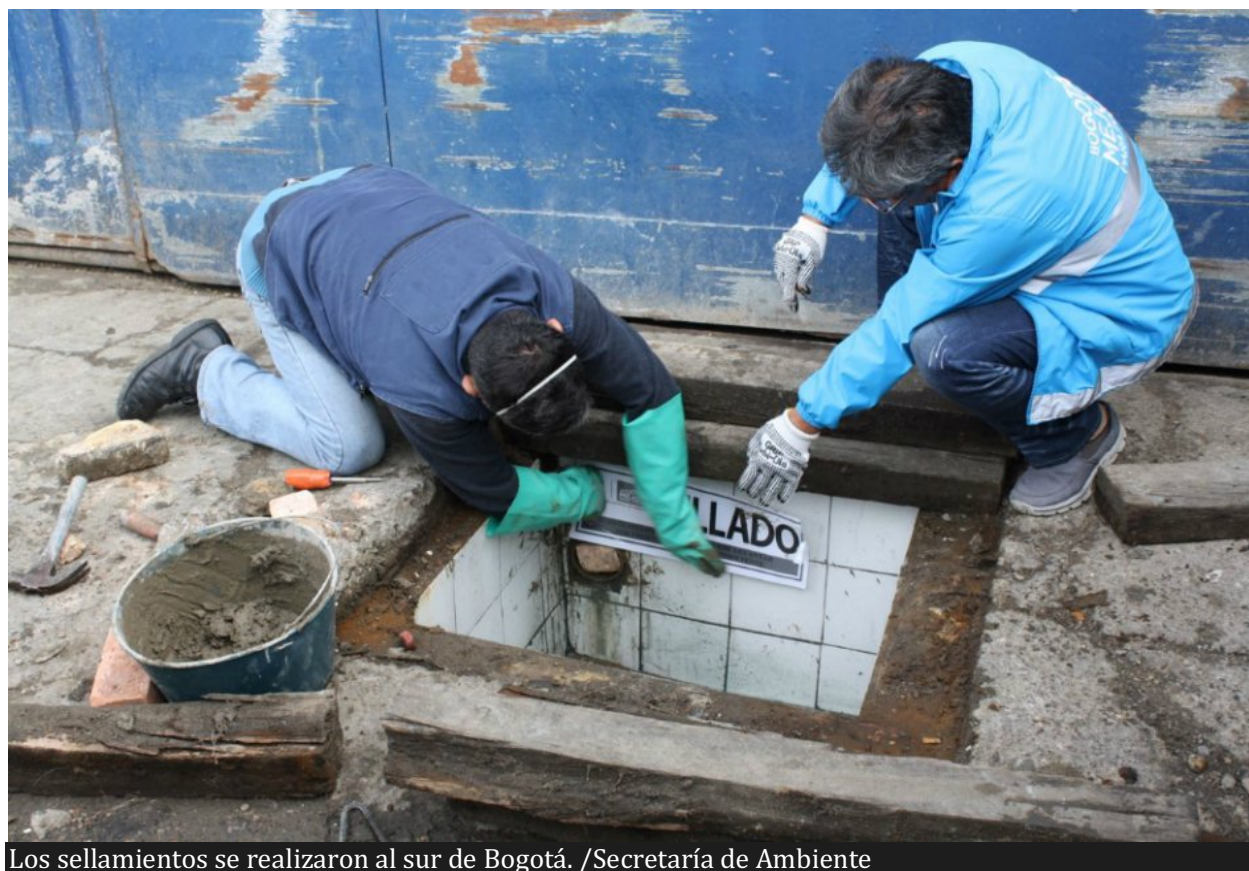

Los sellamientos se realizaron al sur de Bogotá. /Secretaría de Ambiente

La Secretaría de Ambiente, en compañía de la Policía, **selló tres empresas dedicadas al procesamiento de pieles en el sector de San Benito**, al sur de

Bogotá. La razón: estaban vertiendo residuos peligrosos, como el cromo, a la red de alcantarillado que desemboca en el río Tunjuelo. Así, continúan las acciones que se vienen adelantando en los últimos días para proteger los recursos hídricos de la ciudad.

Con esos tres sellamientos, ya son **14 las empresas clausuradas en la última semana por afectar el agua de la capital**. Y podrían enfrentarse a multas que llegan a los \$3.500 millones cada una, por operar sin los requisitos ambientales exigidos.

“Es un compromiso de la administración del Alcalde Enrique Peñalosa sancionar a todas aquellas empresas que están contaminando la estructura ecológica principal de Bogotá. **Las medidas de suspensión de actividades de estas curtiembres se mantendrán hasta que cumplan con los requisitos ambientales** necesarios para operar”, sostuvo Francisco Cruz Parada, el secretario de ambiente.

Este tipo de acciones, aseguraron desde esa cartera distrital, **están enfocadas a dar cumplimiento al fallo del Consejo de Estado que ordenó la recuperación del río Bogotá**. Justamente el viernes pasado, la magistrada Nelly Yolanda Villamizar, del Tribunal de Cundinamarca, encargada de hacer cumplir la sentencia, recorrió ese cuerpo hídrico para verificar su estado.

Si bien resaltó que las condiciones del río han mejorado frente al panorama observado en 2003, cuando empezó la batalla jurídica por esas aguas, encontró que aún hay problemas como que las vacas y los caballos sigue pastando en las orillas. Por eso, **anunció que emitirá medidas cautelares para que los animales no sigan bebiendo del río**, mientras la CAR sostuvo que abrirá procesos sancionatorios contra los dueños de los semovientes.

El Herald 2013 Aug 11

**Location:** <https://www.elheraldo.co/local/quien-ve-por-las-veedurias-ciudadanas-120532>

Last accessed: October 2, 2019

# ¿Quién ve por las veedurías ciudadanas?

BARRANQUILLA

| 11 de agosto de 2013 - 00:06

La veeduría ciudadana como mecanismo participativo desde el cual las personas naturales ejercen control sobre los funcionarios públicos y entidades privadas, sobre sus actuaciones, fue instituida en Colombia mediante la Constitución de 1991 (y posteriormente perfeccionada por la Ley 134 de 1994 o de Participación Democrática), cuya aprobación ubicó a este país (al menos ‘en el papel’) como “uno de los más democráticos del mundo”, precisa Gabriel Bustamante Peña, asesor jurídico- político de la Corporación Viva la Ciudadanía.

ADVERTISING

[inRead invented by Teads](#)

En la práctica, la situación es muy distinta. A pesar de que las aproximadamente 500 veedurías ciudadanas existentes en Colombia cuentan con una Red Institucional de Apoyo a las Veedurías Ciudadanas integrada por la Procuraduría General de la Nación, la Defensoría del Pueblo, la Contraloría General de la República, el Ministerio del Interior y el de Justicia, el Departamento Administrativo de la Función Pública, la Auditoría General de la República, la Contaduría General de la Nación y la Escuela Superior de Administración Pública (Esap), lo cierto es que el oficio del veedor está desprotegido (los veedores ciudadanos se hallan bajo las mismas condiciones de inseguridad que padecen los defensores de los Derechos Humanos) y nulamente remunerado (quienes asumen esta función cívica deben costearse los gastos generados por su actividad y asumir el detrimento para el patrimonio privado que ello significa).

**Se necesita absoluta independencia**

“Las redes de veeduría constituyen el control más inmediato y directo que pone nuestra sociedad en manos de los ciudadanos y son un aliado natural de la Defensoría del

Pueblo; sus denuncias son un auténtico mecanismo de control social”, dice Jorge Armando Otálora, Defensor del Pueblo a nivel nacional, y añade: “Pero si no tienen el presupuesto para jugar un papel con dedicación exclusiva, pues es muy difícil que los veedores ciudadanos cumplan con su tarea”.

Dijo que en este momento existen más de 90 denuncias de amenazas de muerte, especialmente contra aquellos cuya actividad se relaciona con la protección de los Derechos Humanos.

“Y pasan entre 6 y hasta 3 meses y todavía no se ha decidido (por parte del Estado) si se les da protección y se hace un estudio de riesgos. Es una queja recurrente que hacemos ante la Unidad Nacional de Protección”. Lamenta que algunas veedurías ciudadanas sean creadas con el fin exclusivo de ejercer presión sobre funcionarios, con la intención de obtener de ellos prebendas.

“Lo que hacen es generar una mala imagen para una actividad tan importante como lo es la veeduría ciudadana”. Añade que el Estado está en mora de crear una institución que agremie a las veedurías ciudadanas y atienda permanentemente sus necesidades y vele decididamente por su fortalecimiento, asegurando además unos mínimos recursos para sus gastos de funcionamiento. “No tiene presentación que una veeduría local se acerque al gobierno local a pedir apoyo, si lo que necesita una veeduría es tener absoluta independencia”, remacha.

### **Hay mucha carencia de conocimientos y de recursos**

Rocío Mendoza, directora de ‘Barranquilla, cómo Vamos’, detecta varias falencias en los movimientos de veedurías ciudadanas. El primero, dice, es la falta de preparación: “no es culpa de los veedores. A nadie le enseñan a ser veedor ni nadie nace con la vocación de veedor”. Explica que las veedurías suelen surgir en contextos espontáneos ante la necesidad del empoderamiento ciudadano. E incluso aquellos que pudieran tener la vocación de servicio público implícita en la labor de veedor, generalmente carecen de los conocimientos apropiados para dedicarse a temas específicos, Salud, Medio Ambiente, Educación, por ejemplo, cada uno con marcos regulatorios propios.

También ve como un serio obstáculo la falta de garantías para la seguridad personal. Recuerda que la Procuraduría ha revelado que aproximadamente 5000 veedores de Derechos Humanos se encuentran amenazadas en Colombia.

No menos importante: la falta de recursos económicos y de tiempo para ejercer la labor de veedor y, a la vez, el oficio o profesión de los cuales viven. Esta carencia puede llegar a comprometer la integridad del veedor, ya que éste se ve obligado a pedir subsidio de los mismos entes gubernamentales o públicos que debe vigilar.

Explicó que si el veedor ciudadano no presenta su informe con la metodología técnica requerida, da pie, en ese caso, a que el mismo sea fácilmente descalificado o a que los funcionarios que han sido objeto del informe argumenten que existen intereses creados detrás de las intenciones aparentes de la veeduría ciudadana. “Lamentablemente, muchas veedurías son muy débiles en el aspecto técnico. Haces un análisis y encuentras que están compuestas por una, dos, tres personas... con poca infraestructura”.

### **Falta mucha capacitación**

Luis De la Hoz, Director Regional (Caribe) de la Asociación Red Nacional de Veedurías, dice que para las cincuenta veedurías asociadas a esta entidad en la Costa Caribe (diez de ellas en Barranquilla) uno de los principales obstáculos es la falta de conocimiento de los mecanismos de contratación pública, lo que les impide ejercer una labor de control eficaz.

“El resultado que podemos ver: se dice que todos los contratos de obras tienen veedores pero no vemos nunca un pronunciamiento sobre una ejecución o sobre una contratación irregular”. Ve con especial preocupación la falta de capacitación en lo que tiene que ver con los contratos relativos al sector Salud.

Aseguró que actualmente se trabaja de la mano de la Escuela Superior de Administración Pública (una de las entidades adscritas a la Red Institucional de Apoyo a las Veedurías Ciudadanas) para brindar capacitación y subsanar en lo posible esta carencia. Las redes de veedurías ciudadanas, en su mayor parte, son conformadas por desempleados y pensionados o empleados temporales y personas de bajo nivel educativo.

### **Veedurías de bolsillo o comités de aplausos**

Para Pablo Bustos, Fundador y presidente nacional de la Red de Veedurías Ciudadanas, la misma ley colombiana posee grandes vacíos en cuanto a la regulación de las veedurías. “La Constitución ni siquiera las menciona expresamente; invita a la participación pero no dice de qué manera ni la focaliza en el tema de anticorrupción.

Y cuando hace la reglamentación de los mecanismos de participación ciudadana (en 1994), solamente hace una única mención de las veedurías en el Artículo 100 de ese entramado regulatorio. “Es el resultado de la actividad de las veedurías lo que hace que se produzca la Ley 850 como estatutaria de las veedurías ciudadanas”.

Explica que esto causa una ausencia de beneficios, recompensas y garantías para los veedores ciudadanos, desde la normatividad colombiana. En cuanto a la seguridad que el Estado ofrece a los veedores en Colombia, sostiene que “no hay garantías”. Indica que toda la responsabilidad y el riesgo de la investigación y la denuncia pública la

asume el veedor, mientras que el Estado en su conjunto se sustrae del cumplimiento de sus mínimos deberes de protección.

Dijo que esto es equiparable a una práctica sistemática de hostigamiento que conspira contra la posibilidad de hacer control social y, por lo tanto, de hacer veeduría. Sostiene que no hay una política clara al respecto pero sí mucha retórica. Con respecto a la utilización de la veeduría ciudadana como mecanismo para lucro personal a través de la práctica de chantajear al funcionario público a cambio de no publicar informes sobre su mala gestión, estimó que faltan mecanismos de autorregulación y de mecanismos por medio de los cuales las veedurías puedan rendir cuentas a la comunidad sobre sus gestiones. “Indudablemente, existen falsos veedores que se convierten en comités de aplausos”, comenta, explicando que estos, en vez de evaluar integralmente la conducta de los funcionarios públicos, se convierten en entes a merced de quienes juegan alguna preminencia en lo público. También se refirió a estos como “veedores de bolsillo”.

# EMBALSE DEL MUÑA ASFIXIA A SIBATÉ

Todavía Alberto Ramos, un tendero que llegó a vivir hace 18 años a Sibaté (Cundinamarca), recuerda que la laguna del tenía rastros de paraíso. No pensó entonces que ese anillo de flora y fauna alrededor del municipio, se les iba a conve otros 25.000 habitantes en un dolor de cabeza. (VER MAPA INFOGRAFIA)

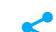

Compartir

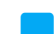

Comentar

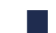

Guardar

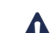

Reportar

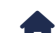

Portada

Por: **FLORANGELA HERRERA** 15 de enero 1996 , 12:00 a.m.

Ramos, quien vive en el centro de la localidad, dice que sus constantes jaquecas y gripas se deben a la descomposición de las aguas del Muña, un embalse que es surtido por el contaminado río Bogotá. Es lo mismo que le pasa a cientos de sus paisanos.

La situación ha generado desde una tutela, hasta las protestas de la gobernadora, Leonor Serrano de Camargo, quien dice que la vida en Sibaté, un municipio a escasos 40 minutos de Bogotá, está en riesgo.

Pero la solución no está cerca porque dejar de surtir el embalse con esas aguas significa dejar sin luz a por lo menos tres departamentos.

Los olores son muy fétidos, sobre todo en la tarde cuando se despierta un zancudo que hace nido en el buchón (planta acuática). Sus picaduras causan granos y fiebres , dice Ramos.

A sólo unos metros de El Muña y a la entrada del municipio, encerrado por muros, en una casona llena de flores, se localiza La Colonia, un sanatorio que hace poco adoptó el nombre de Centro Masculino Especial La Colonia de Sibaté, donde hay 500 pacientes. Uno de ellos, Alvaro Bonnet, de 65 años, quien estudió derecho en la Universidad Libre de Bogotá, también se queja. Mantengo con dolor de cabeza. Además, los zancudos nos pican y nos hacen salir verrugas .

La contaminación se siente, se toca y se huele, en lo que fuera hace varias décadas, un templo de la flora y la fauna, que hoy es calificado como un lecho para la muerte. El problema se percibe en los sanatorios de la Beneficencia de Cundinamarca y en otros privados que tienen su sede en Sibaté, donde hay 2.000 pacientes.

Según sor Hilda Aponte Soler, directora de uno de los albergues, los enfermos diagnostican infecciones en la piel y respiratorias, como consecuencia de la contaminación ambiental. Aquí se juega con la vida de los enfermos y de quienes

atendemos en el sanatorio. Las plagas como ratas y zancudos son incontrolables , asegura la religiosa.

La laguna del Muña, un anillo que rodea casi en su totalidad a Sibaté, comprende 900 hectáreas; tiene cero oxígeno y cero especies vivientes, lo mismo que le ocurre al río Bogotá.

Sin embargo, no es raro ver a las vacas alimentarse de los buchones y beber sus aguas, mientras que los niños juegan a saltar pequeños islotes.

Sólo pañitos de agua El secretario de Gobierno de Sibaté, Ricardo Fino, dice que la Empresa de Energía de Bogotá (EEEB) es la directa responsable de esta crisis, porque deposita en el Muña aguas negras usadas para generar energía en las hidroeléctricas instaladas entre el Salto del Tequendama y el municipio de El Colegio .

Para combatir las plagas que afectan a la población, la EEEB fumiga cada tres meses. Hace dos años esa entidad debió realizar un estudio para iniciar el saneamiento de la laguna, en atención al fallo de una tutela interpuesta en su contra por José Domingo Gutiérrez, quien desconoce por qué la sentencia no se ha cumplido.

La tutela también ordena hacer un anillo ecológico, pero los resultados no se han visto. La EEEB dice que se inició un programa de contratación para fertilizar 5.000 árboles y otro de educación ciudadana, con el objeto de cumplir con la tutela y contrarrestar los problemas ambientales, pero los habitantes de Sibaté ya no creen.

Con la tutela pido la descontaminación y el no bombeo de las aguas del río Bogotá. El juez tutela el derecho, pero no suspender el bombeo , explica Gutiérrez.

El accionante pidió al juzgado promiscuo de circuito de Soacha aplicar las medidas de hecho consagradas en el decreto reglamentario de la tutela, entre las que figura el arresto de 48 horas para los responsables del incumplimiento. No queremos paños de agua tibia. Estamos organizando una manifestación para exigir respeto con el pueblo , anota.

Los niños son los más afectados, advierte el médico Orlando Rodríguez. Los olores del embalse generan infecciones agudas respiratorias y de la piel, poliparasitismo intestinal y conjuntivitis.

La dirección del centro de salud de Sibaté asegura que las enfermedades de la población local son las mismas que sufre la mayoría de los habitantes de la región.

Voceros de Juntas de Acción Comunal de Sibaté dicen que la población no desconoce el servicio que se presta a departamentos como Tolima, Meta y Cundinamarca, pero sí que se ponga en peligro su vida. Un líder cívico dice que sabemos que los compromisos son nacionales, departamentales y locales. Esto representa un alto costo económico pero se requiere de medidas de alivio .

Sin compromisos Pese a que el gerente (e) de la EEEB, Hernán Ospina, reconoce la grave situación de Sibaté, también asegura que la entidad es víctima y no la

contaminante como se pretende hacer creer .

Ospina dijo que la contaminación del río Bogotá parece a una bola de nieve que quiere ahogarnos. Estamos en mora en buscar una solución, pero es un compromiso de muchos. Así como están las cosas, sólo se lleva la muerte al Magdalena, donde desemboca todo el problema de la contaminación .

Las plantas de la Empresa de Energía se localizan sobre el curso del río Bogotá. Esto las desgasta y obliga a millonarias inversiones que bien podrían destinarse a otros campos , dijo el funcionario.

Pero la gobernadora de Cundinamarca, Leonor Serrano, cree que se están violando los derechos humanos de toda la población.

Recuperar el río Bogotá requiere de 30 años. En ese tiempo el municipio desaparecerá. Propongo que el agua que se bombea al embalse del Muña se trate antes de ser vertida , dice la mandataria.

La construcción de una planta de tratamiento demanda una inversión millonaria, pero ni el Distrito de Bogotá ni el departamento están dispuestos a asumir el costo.

La gobernadora Serrano afirma que el problema lo origina la EEEB y el departamento no tiene por qué apagar los incendios de Bogotá. Cundinamarca tiene dejar de hacer carreteras, de atender la salud y la educación para sanar los daños ajenos. Mientras tanto, la capital parece un avestruz, esconde la cabeza y sólo la saca para hacer payasadas, mientras que los problemas siguen creciendo .

## Descubre noticias para ti

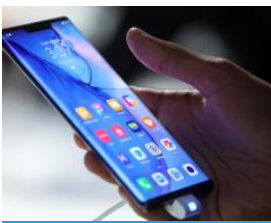

**HUAWEI** 6:28 PM

Huawei niega rumores sobre 'puerta trasera' para instalar Google Play

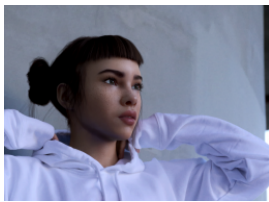

**BBC NOVEDADES TECNOL...**

6:24 PM

La instagrammer con un millón y medio de seguidores que no existe

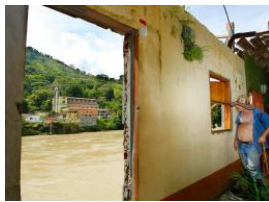

**HIDROITUANGO** 5:55 PM

237 familias han regresado a Puerto Valdivia después de la emergencia

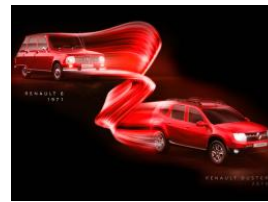

**RENAULT**

Sea parte del recorrido de los 50 años de esta marca emblemática

## Empodera tu conocimiento

**RUT** ABR 22

Los pasos que debe seguir para revisar y actualizar su RUT

**EMPRESAS** ABR 22

Las nuevas movidas de Brinks, Auteco, Luker, Inverlink y Biominales

**BBC ENTRETENIMIENTO** ABR 22

El inventor de los cubitos de caldo de gallina y su millonario negocio

**JEP** ABR 22

Marlon Marín entregaría información sobre colados en listas de Farc

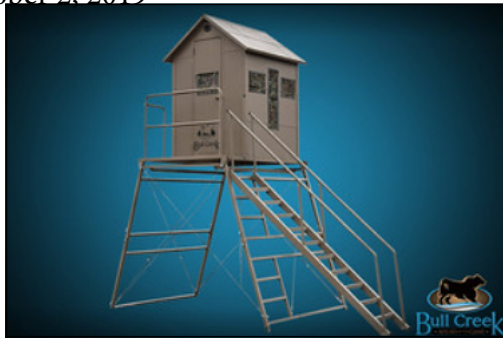

📍 Beebe, AR

## Bull Creek Outdoors

Home & Garden, Hunting & Fishing Supplies

Bull Creek Outdoors was established in 2014 and locally manufactures Game Changer Hog Traps; Game Changer Cam; Bull Creek Blinds;...

See on Yelp

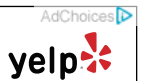

☰ | EL TIEMPO

ARCHIVO

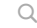

SUSCRIBIRME

INICIAR SESIÓN

# Marchas frente a la Corte

Con pancartas y consignas de apoyo a los magistrados y de rechazo a las EPS, pacientes y trabajadores del sector salud manifestaron ayer frente a la Corte Constitucional.

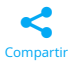

Compartir

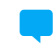

Comentar

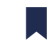

Guardar

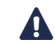

Reportar

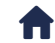

Portada

Por: **REDACCION EL TIEMPO** 08 de julio 2011 , 12:00 a.m.

Rosaura Muñoz, mamá de cuatro hijos y abuela de dos nietos, llegó al Palacio de Justicia para culpar al sistema de salud de haberla dejado postrada en una silla de ruedas.

Cuenta que un médico le recetó un medicamento para la fibromialgia al que resultó alérgica, lo que le causó complicaciones que la dejaron discapacitada.

Ella no era la única que se quejaba por el mal servicio. Apoyada sobre una de las barandas puestas frente a la entrada de la Corte, María Navarrete, de 75 años, protestó porque desde hace un mes su EPS no le autoriza la entrega de las bolsas para la colostomía que le practicaron como parte del tratamiento de un cáncer. "Vivo sola, no me autorizan las bolsitas y no puedo ni soñar con que me atiendan en el Instituto de Cancerología, porque la EPS no tiene contrato".

Por casos como los de Rosaura y María llegó a protestar Carmen Mayusa, enfermera de un hospital de Soacha. "Este sistema de salud afecta a todos los colombianos y está estructurado para beneficiar a unos pocos", dijo. Ellas sumaron sus voces a las de otros ciudadanos que le piden al Gobierno que introduzca cambios de fondo al servicio

## Descubre noticias para ti

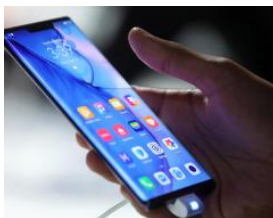

**HUAWEI** 6:28 PM

Huawei niega rumores sobre 'puerta trasera' para instalar Google Play

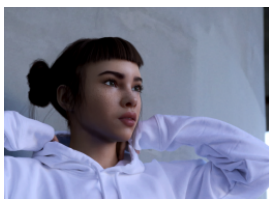

**BBC NOVEDADES TECNOL...**

6:24 PM

La instagrammer con un millón y medio de seguidores que no existe

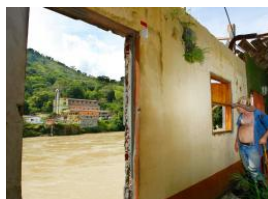

**HIDROITUANGO** 5:55 PM

237 familias han regresado a Puerto Valdivia después de la emergencia

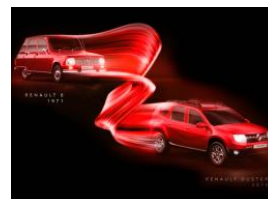

**RENAULT**

Sea parte del recorrido de los 50 años de esta marca emblemática

# Corte exige a Gobierno control sobre 'mercaderes la salud'

Pide que el Estado repense el papel de los privados en el sector. Saqueo se sentirá hasta el 2030.

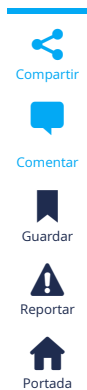

Por: **REDACCION EL TIEMPO** 10 de mayo 2012 , 09:23 p.m.

En un claro cuestionamiento al modelo de salud vigente desde hace dos décadas, la Corte Constitucional le pidió al Estado "reflexionar seriamente" sobre la permanencia de entidades privadas, en su calidad de intermediarias, en el sistema.

En una audiencia de ocho horas, para evaluar el cumplimiento de una sentencia del 2008 que ordenó corregir el "estado de cosas inconstitucional" de la salud, fue tema central la corrupción.

Después de escuchar al Gobierno, a los organismos de control y a los prestadores del servicio y asociaciones de usuarios, **los magistrados concluyeron que "la malversación de los recursos, el desgüeño administrativo y la falta de control" son males que amenazan ese derecho fundamental de los colombianos.** Por eso, le ordenaron al Gobierno meter en cintura a los que llamó "mercaderes de la salud". (Lea

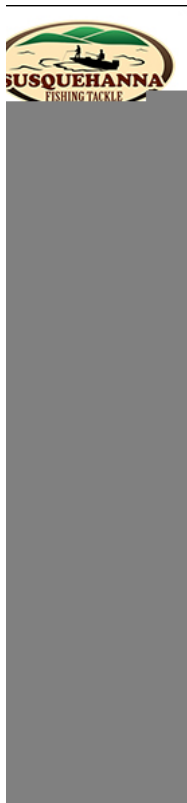

también: Guía básica para entender el escándalo en el sector de la salud ).

"Los particulares que prestan dicho servicio en nombre del Estado y bajo su tutela deben comprender que la función que cumplen en momento alguno puede ser entendida como un negocio -dijo la Corte- (...) Causa inmenso rechazo conocer los acuerdos llevados a cabo por EPS de régimen contributivo con el fin último de defender sus intereses y no los de la población colombiana".

Y dijo: "Causa inmensa preocupación que los diferentes órganos estatales no comprendan aún los compromisos de un Estado Social de Derecho (...) La actividad de los mercaderes de la salud va en detrimento del derecho fundamental de la sociedad".

**El tribunal pasó al tablero a los ministros de Hacienda, Juan Carlos Echeverry, y de Salud, Beatriz Londoño**, para que explicaran qué han hecho para controlar el buen uso del millonario presupuesto que cada año destina el país para el servicio y que sin embargo no alcanza. (Lea también: Así se planeó y ejecutó el gran saqueo de la salud )

Colombia, según una investigación de la Procuraduría, destina anualmente casi 40 billones de pesos al sistema, pero la cobertura y el servicio siguen siendo precarios. **"Son recursos superiores a los que gastan Japón, España o Inglaterra. Si se utilizaran bien, tendríamos uno de los mejores sistemas del mundo", dijo en su momento el procurador Alejandro Ordóñez.**

La audiencia de este jueves fue presidida por los magistrados **Iván Palacio, Mauricio González, Nilson Pinilla y Eduardo Mendoza**. Ante ellos, la Ministra de Salud anunció que en junio estará completa la unificación de los planes de los regímenes contributivo y subsidiado, tal y como lo había ordenado la Corte.

También reveló que gracias a las investigaciones y los nuevos controles, el Gobierno redujo el número de recobros y de tutelas y generó un ahorro al sistema de más de 450.000 millones de pesos en el último año.

Sin embargo, el Ministro de Hacienda admitió que solo en el 2025 se empezaría a superar el déficit de la salud. Y aunque reconoció que la ampliación de la cobertura y el costo de los tratamientos pesan en esa situación, **atribuyó buena parte de la crisis al saqueo de los corruptos**. "El sistema de salud ya pasó por su peor momento, pero los desfalcos dejarán pérdidas hasta el 2030", aseguró.

Por su lado, Jaime Arias, presidente de la Asociación de Empresas de Medicina Integral (Acemi), **se declaró en contra del "optimismo" del Minhacienda y aseguró que el sistema es insostenible por el alto costo de servicios** que tienen que asumir los prestadores y el sistema en general.

¿Cartel de medicamentos?

En su informe ante la Corte, la contralora Sandra Morelli denunció un monopolio en la distribución de medicamentos, que fija precios a su acomodo y desangra el sistema. **Estas empresas, dijo, funcionan como un cartel de lo que llamó la "fármaco-economía"**.

"Hay facturas de algunas drogas que valen 10 mil pesos y que son aumentadas a ocho millones de pesos", denunció.

Y el fiscal general, Eduardo Montealegre, anunció una unidad especial para investigar los fraudes en la salud.

Reacciones

**Beatriz Londoño**  
**Ministra de Salud**

"Aunque hay avances, tenemos que ser autocríticos. El Gobierno está dispuesto a oír análisis y apuntarle a cambios razonables para mejorar la salud".

**Sandra Morelli**  
**Contralora General de la Nación**

"La Corte Constitucional plantea un debate acertado. Hay que mirar modelos como el de Canadá, que parten de la base de que la salud no es un negocio".

**Sergio Isaza**  
**Presidente Federación médica colombiana**

"La Corte exige que se vigile con lupa la participación de privados y se sancione. Hay que evitar los desmanes que por años han alterado el curso del sistema".

**Andrés Aguirre**  
**De la asociación de clínicas**

"El sistema ha permitido que el dinero llegue a los malos, mientras los buenos esperan los recursos. Eso daña las buenas instituciones y a la salud".

**Jaime Arias**  
**Presidente de Acemi Eps del contribut.**

"Si el Gobierno, la Corte y los altos poderes creen que el sistema debe ser solo público, Acemi respeta esa opinión".

Cuatro duras conclusiones del tribunal

## **1. Corrupción**

"El alto grado de corrupción, la prevalencia absurda de intereses particulares, la debilidad manifiesta en el control estatal y el inadecuado manejo administrativo por ineficiencia afectan los recursos de la salud (...) Hay un sombrío panorama".

## **2. Inequidad**

"Nuestra sociedad está enferma y en tránsito a cuidados intensivos. El sistema de salud pareciera colapsar, en detrimento de los derechos fundamentales de quienes

habitamos este Estado. Es imperioso que el país aborde el rediseño de la estructura".

### **3. Plata desviada**

"Hay un complejo panorama en el manejo de los recursos del sistema de salud. La gran mayoría de dichos dineros está siendo dilapidada para fines totalmente ajenos al propósito para el que fueron establecidos".

### **4. No hay mejoría**

"Todo continúa igual y con tendencia clara a deteriorarse. Esta Corte ha permanecido vigilante en el cumplimiento de órdenes dictadas en la sentencia, evidenciando leves mejorías que en nada han incidido en el goce efectivo del derecho".

#### **Opinión**

Soluciones más audaces

**Carlos F. Fernández**

**Asesor médico de EL TIEMPO**

El sistema de salud es una enrevesada trama de normas, procesos e intermediarios, que lo han convertido en un aparato inmanejable, ineficiente, costoso e inviable en muchos aspectos.

Los remedios apenas han servido para prolongar la agonía.

Frente a la salud todo el mundo está perdiendo, y esa es la evidencia de que el tiempo de los remiendos se acabó y que llegó la hora de pensar en soluciones más audaces.

Como la salud es un derecho, tendría que estar constituida por un núcleo esencial definido en un plan único, suficiente y universal, definido técnicamente sobre bases epidemiológicas para atender la enfermedad y que complementa, dentro de una política pública, la intervención colectiva de todos los factores modificables que la generan.

Este plan debe brindarse fácilmente a la gente a través de redes integradas de servicios, habilitadas regionalmente para lo básico y nacionalmente para lo más complejo.

El sistema tiene que contar con un sólido esquema de vigilancia, centrado en la atención del usuario, con indicadores de calidad y resultados de salud y seguridad clínica.

Siguiendo a la Corte, habría que reducir la intermediación, pero dejando a un afiliador único, que administre las autorizaciones y audite los pagos con base en la calidad y la pertinencia de los servicios. El único requisito para que todo colombiano sea atendido debe ser su documento de identidad.

SEGUIR BOGOTÁ

▶

Regístrate o inicia sesión para seguir tus temas favoritos.

# Por contaminar el río Bogotá, sellan 23 curtiemb

La intervención se llevó a cabo en los municipios de Villapinzón y Chocontá.

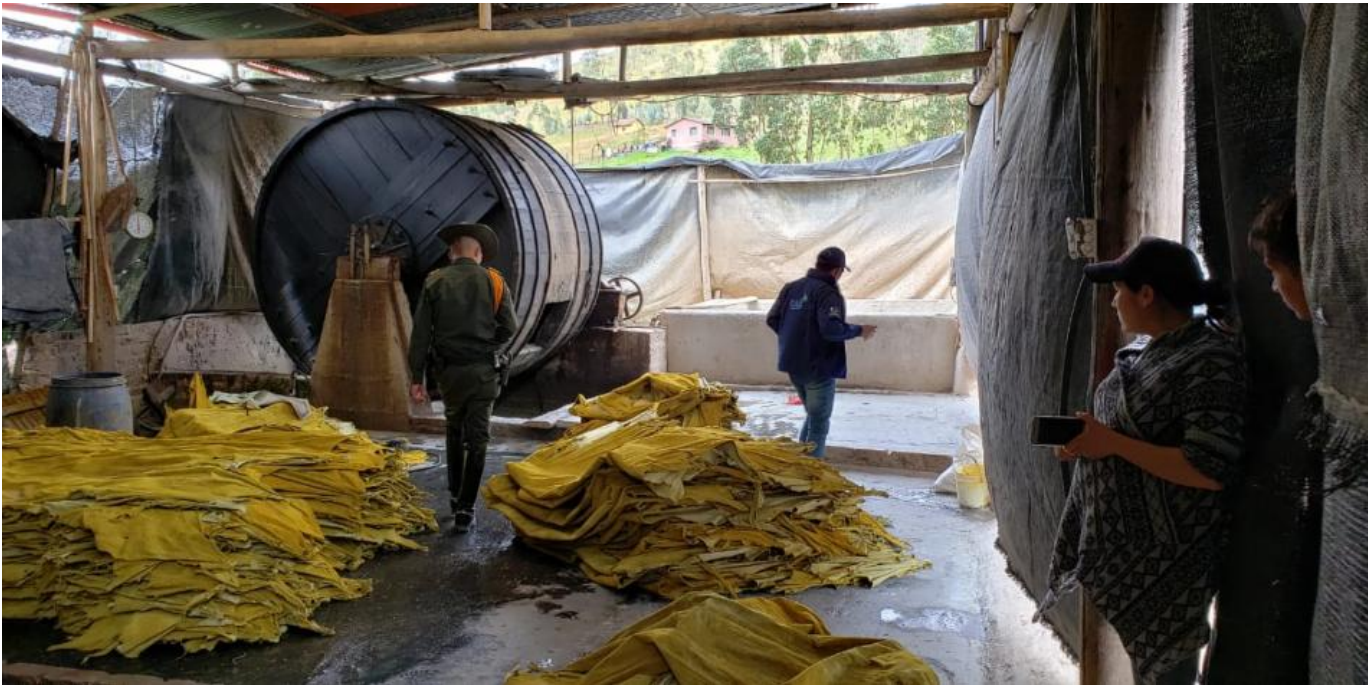

Durante el operativo se encontraron bombos, motores y canecas de polysin de 40 kilos.  
**Foto:** Corporación Autónoma Regional (CAR)

**RELACIONADOS:** CUNDINAMARCA | RÍO BOGOTÁ

Por: **BOGOTÁ Y EL TIEMPO ZONA** 18 de noviembre 2018 , 08:39 p.m.

Por generar vertimientos ilegales que contaminaban el río Bogotá, la Corporación Autónoma Regional (CAR) de Cundinamarca selló 23 curtiembres en los municipios de Villapinzón y Chocontá, con el apoyo del Ejército y la Policía Nacional.

El operativo fue planeado hace un mes y se llevó a cabo en cumplimiento de una orden del Tribunal Administrativo de Cundinamarca, que **por auto del 27 de marzo del 2018 ordenó el cierre de las curtiembres de la cuenta alta del río Bogotá** que persistieran en sus actividades contaminantes.

### Temas relacionados

CUNDINAMARCA OCT 01

A prisión presuntos disidentes de las Farc que azotaban a Cundinamarca

HISTORIAS OCT 01

Las 10 historias más leídas de Bogotá y la región en septiembre

SOACHA OCT 01

Accidente en transporte informal de Soacha dejó varios heridos

El director jurídico de la CAR, Juan Camilo Ferrer, informó que en esta zona **hay presencia de empresas informales que no cuentan con toda la documentación al día**, otra de las razones por la cual se procedió a sellarlos.

La CAR identificó 24 puntos sobre la ronda del río Bogotá, y durante el operativo encontró bombos, motores y canecas de 'polysin' de 40 kilos que fueron decomisados. También se impuso una medida preventiva por el vertimiento a una quebrada de la zona.

- 🔗 **Así fue la jornada que le dejó 13.000 árboles nuevos a la ciudad**
- 🔗 **Ciudadanos plantaron 13.000 árboles en Bogotá**
- 🔗 **Desde el lunes camiones no podrán circular por la calle 13 de 6 a 8 am**

"Fue un operativo que nos dejó muy preocupados, ya que **vemos cómo se han implementado negocios dedicados a la transformación del cuero en áreas de ronda**, las cuales no pueden ser ocupadas por ningún tipo de actividad. Esto es un tema que también les compete regular a las autoridades municipales", agregó Ferrer.

## “El comercio se está viendo afectado por aquellos que compran cueros sin verificar la legalidad de estas actividades”

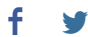

Los sellamientos serán temporales, mientras los establecimientos logran demostrar que no han llevado a cabo actividades ilegales en esta área de ronda; **de lo contrario, serán cerrados de manera definitiva.**

"Hacemos este seguimiento a las actividades productivas que se realizan sobre la ronda del afluente, y si no cumplen con las normativas ambientales, se puede llegar a sanciones millonarias", sostuvo Clara Patricia Álvarez, funcionaria de la CAR.

El director Ferrer hace un llamado a los **ciudadanos que compran cueros a estos establecimientos para que verifiquen si es legal o no.** "El comercio se está viendo afectado por aquellos que compran cueros sin verificar la legalidad de estas actividades", concluyó.

REDACCIÓN BOGOTÁ Y EL TIEMPO ZONA

Descarga la app El Tiempo. Con ella puedes escoger los temas de tu interés y recibir notificaciones de las últimas noticias. [Conócela acá](#)

# 10 años después, tutelas en salud siguen creciendo en vez de reducirse

Gobiernos fracasan en cumplir la tarea de reducirlas, ordenada por la Corte Constitucional en 2008.

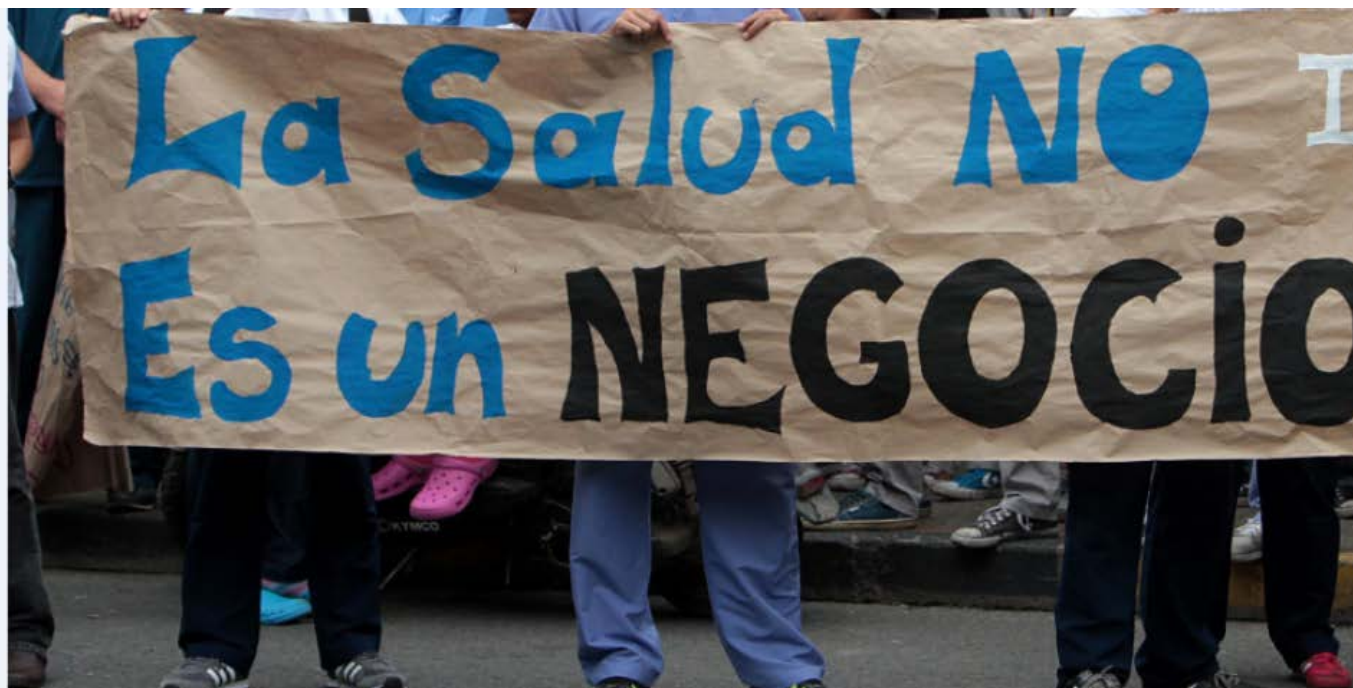

Protesta por salud en Colombia

Foto: Archivo

**RELACIONADOS:** SALUD | TUTELAS | CORTE CONSTITUCIONAL | GOBIERNO

Por: **Milena Sarralde Duque** 04 de enero 2019 , 12:04 p.m.

Aunque hace más de 10 años la Corte Constitucional le ordenó al Ministerio de Salud tomar una serie de medidas para reducir el número de tutelas en las que los colombianos piden servicios de salud, los últimos gobiernos no lograron cumplir las metas que impuso el alto tribunal.

Según un balance de la misma Corte, hasta el 29 de noviembre del año pasado se habían presentado 197.055 tutelas exigiendo servicios de salud, un promedio de 539 diarias.

Este derecho es el segundo más vulnerado en el país, después del de petición, que ocupa el 44 por ciento del total de las 583.200 tutelas tramitadas en el 2018 por diferentes asuntos.

La cifra de tutelas en salud es dramática pues, si se compara con la de 1999, cuando se presentaban 21.301 de estos recursos, ha crecido un 825 por ciento (ver infografía). Y si se compara con la del 2008 –año en el que la Corte emitió el fallo en el que le ordena al Gobierno bajar las tutelas, afirmando que la vía judicial no podía ser el mecanismo para acceder a los servicios de salud–, **estos recursos han crecido un 37 por ciento.**

Eso significa que lejos de bajar, el número de peticiones para la salud de los colombianos y que terminan llegando a los estrados judiciales, siguen al alza. Y fuera de tratarse de tutelas sin fundamento, **por lo menos el 86 por ciento fueron concedidas en primera instancia, lo que muestra que los colombianos tenían razón en su reclamo.** Esa cifra podría ser incluso mayor si se tiene en cuenta que, a veces, cuando sale el fallo el hecho ya fue superado o el paciente murió.

En el 2018, según las cifras de la Corte, **las mujeres fueron quienes más interpusieron estos recursos (59 por ciento del total), seguidas por los hombres (40 %).** En los registros se cuenta con 63 tutelas de la población LGBTI y 1.635 de personas jurídicas. Y las regiones con más tutelas, según cifras del 2017 de la Defensoría, son Antioquia (21 %), Valle (10 %) y Bogotá (8,12 %).

De hecho, el alto número de tutelas en salud llevó este año a la Procuraduría, a través de su delegado para Salud, Luis Adolfo Díazgrados, a cuestionar los obstáculos que encuentran los usuarios y a señalar que “la puerta de entrada al sistema de salud es la vía judicial, y eso no puede ser”.

- 💡 'Contra la corrupción, Colombia necesita más acción que indignación'
- 💡 Las empresas que, a través de redes, acaparan la contratación
- 💡 El millonario fallo que puede acabar con la Superintendencia de Salud
- 💡 Para fumigar, Gobierno debe demostrar que no habrá daño a salud: Corte
- 💡 Condenas por malos manejos en la salud suma 2.1 billones: Contraloría

## Lo que se solicita

Del balance de la Corte llama la atención que lo más tutelado, **con 66.282 de estos recursos, es la práctica oportuna de los procedimientos médicos (30,52 %),** y la entrega oportuna de medicamentos e insumos (22,17 %).

Los colombianos también reclamaron en 21.146 tutelas porque no les asignan citas médicas, o en 21.382 casos por no contar con transporte o viáticos para poder acceder a los servicios de salud.

Fuentes del grupo de la Defensoría del Pueblo que realiza desde 2008 –tras la orden de la Corte– un estudio del comportamiento de las tutelas en salud, aseguran que pese a las medidas tomadas por el Gobierno, **ninguna ha servido para aliviar la crisis del sistema. Ni siquiera la Ley Estatutaria de Salud del 2015 que eleva este servicio a derecho fundamental.**

Una prueba de la crisis, señala el estudio de la Defensoría, es que mientras antes se presentaban recursos judiciales para asuntos complejos, **ahora las tutelas se dan hasta para lo más sencillo, como para pedir la entrega de acetaminofén o Ibuprofeno,** medicinas que están en el Plan Obligatorio de Salud o Plan Básico de Servicios y que, con mayor razón, no deberían tener que pasar por un juez.

Según el balance de la Corte, el año pasado **hubo 17.261 acciones judiciales por un medicamento que sí estaba incluido** y que debió ser entregado sin ninguna traba. Por medicamentos e insumos excluidos del plan básico se presentaron 6.468 tutelas.

Las especialidades más frecuentes en las tutelas son neurología, con el 11 por ciento, ortopedia (11 por ciento) y oncología (9,49 por ciento). Precisamente, en un fallo de hace tres meses, la Corte regañó al Minsalud y a la Supersalud recordándoles que los pacientes con enfermedades como cáncer deben ser atendidos de forma prioritaria. Esto porque, en promedio, tienen que superar hasta 30 trámites para un diagnóstico, y esperar tres meses para iniciar un tratamiento.

MILENA SARRALDE DUQUE  
REDACCIÓN JUSTICIA @MSarralde

Descarga la app El Tiempo. Con ella puedes escoger los temas de tu interés y recibir notificaciones de las últimas noticias. [Conócela acá](#)

## Empodera tu conocimiento

ÁLVARO URIBE 07:39 P.M.

**El chiste de Uribe sobre la fuga de Aída Merlano**

ANTICORRUPCIÓN 04:35 P.M.

**La mala hora de los proyectos anticorrupción**

ASESINATO 03:55 P.M.

**Atado de pies y manos es encontrado muerto sacerdote en Villavicencio**

AIDA MERLANO 03:43 P.M.

**Procuraduría suspende a 8 funcionarios del Inpec por fu de Merlano**

## Nuestro Mundo

COLOMBIA

INTERNACIONAL

BOGOTÁ MEDELLÍN CALI BARRANQUILLA N

HIDROITUANGO 05:55 P.M.

**237 familias han regresado a Puerto Valdivia después de la emergencia**

CALI 04:57 P.M.

**Invitación a ser parte de la Bienal de danza**

ICBF 04:31 P.M.

**ICBF atiende caso de niño que estaría fumando marihuana en Bello**

PROMIGÁS 03:46 P.M.

**Fallo judicial frena obras de ampliación de gasoducto en el Caribe**

# Banco Mundial destaca avances de obras en el río Bogotá

La organización hizo una inspección a los proyectos que está financiando para recuperar el río.

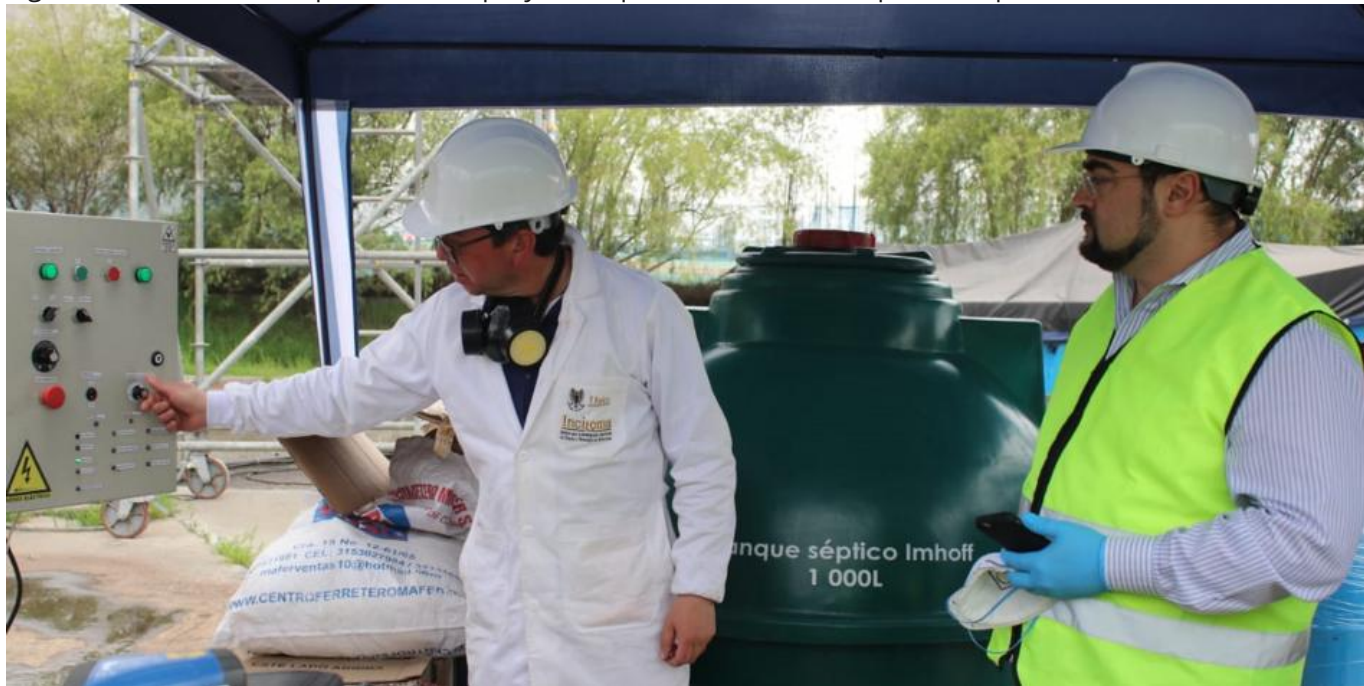

La inspección del Banco Mundial a las obras se realizó de miércoles a viernes de la semana pasada.

Foto: Cortesía CAR Cundinamarca

RELACIONADOS: [RÍO BOGOTÁ](#) | [BANCO MUNDIAL](#) | [CAR](#) | [PTAR](#)

Por: [Bogotá](#) 31 de marzo 2019, 08:00 p.m.

Durante tres días, del miércoles al viernes de la semana pasada, una misión del Banco Mundial estuvo en la ciudad realizando una visita a los diferentes proyectos que está adelantando la CAR Cundinamarca para descontaminar el río Bogotá, y que ellos están financiando.

- 🔗 [Cara a cara por la calidad del aire en la ciudad](#)
- 🔗 [Condiciones meteorológicas ayudaron a mejorar calidad del aire en 35 %](#)
- 🔗 [Declaran estado de prevención ambiental en Mosquera](#)

El préstamo, por 250 millones de dólares, se suscribió en el 2011. Con estos recursos, además de algunos propios de la corporación, **se está desarrollando la ampliación y optimización de la Ptar El Salitre, la adecuación hidráulica del río, entre otras intervenciones.**

Antonio Rodríguez, gerente del Banco Mundial para este proyecto, aseguró, una vez terminada la inspección, estar satisfecho con los avances.

“Se sigue registrando un progreso importante en el componente de obra de la Ptar, registrándose **un avance de alrededor del 65 por ciento, un dato muy positivo porque hemos visto que algunas actividades se han adelantado al cronograma previsto**”, reconoció Rodríguez.

El delegado señaló además que se ha dado cumplimiento al plan de gestión ambiental y social y se han acatado las recomendaciones hechas por el panel de inspección. Todo esto contribuyó a que en diciembre pasado, **el Banco Mundial extendiera por un año más el plazo para pagar el préstamo.**

Según confirmó Néstor Franco, director de la CAR, la deuda actual es de unos 90 millones de dólares, que confía en poder pagar este año.

**“Se sigue registrando un progreso importante en el componente de obra de la Ptar, registrándose un avance de alrededor del 65 por ciento”**

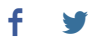

De otro lado, uno de los proyectos que también supervisó el Banco Mundial fue el del parque lineal, el cual consiste, en su primera fase, en la construcción de embarcaderos y plazoletas a lo largo de 40 kilómetros de la ronda del río Bogotá.

“La primera etapa consiste **en senderos y un monitoreo tecnológico desde Soacha hasta la calle 80, e iremos avanzando.** El sistema de cámaras de largo y mediano alcance ya está instalado y estará funcionando esta semana”, aseguró Franco. Con esto no solo buscan custodiar el río Bogotá para que no sea contaminado por manos inescrupulosas, sino que también funcionará para ayudar a mejorar la seguridad de los ciudadanos a lo largo de la ronda.

### **¿Qué hace falta?**

Pese a los avances que se anunciaron tras la visita del Banco Mundial, la Veeduría Distrital señaló **dos proyectos a los que se debe prestar atención para continuar con la descontaminación del río Bogotá.**

De un lado, advierten que es necesario avanzar en **los diseños de ingeniería de detalle del tratamiento secundario de la Ptar Canoas**, al igual que también fortalecer el programa de corrección de conexiones erradas.

Frente al proyecto de Canoas, Néstor Franco aseguró que ya hay cierre financiero y que la CAR está cerca de firmar un convenio con la Alcaldía de Bogotá para salir a contratar obras **“ojalá en el segundo semestre del 2019 o, máximo, en el primero del 2020”.**

Location: <https://www.eltiempo.com/bogota/con-drones-y-camaras-vigilan-el-rio-bogota-las-24-horas-363384>

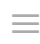 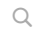 SUSCRIBIRME INICIAR SESIÓN last accessed October 2, 2019

BOGOTÁ

BOGOTÁ

SEGUIR BOGOTÁ

# Con drones y cámaras vigilan el río Bogotá las 24 horas

La CAR Cundinamarca y Codaltec instalaron 14 torres de control para monitorear el afluente.

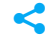  
Compartir

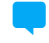  
11  
Comentar

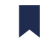  
Guardar

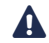  
Reportar

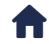  
Portada

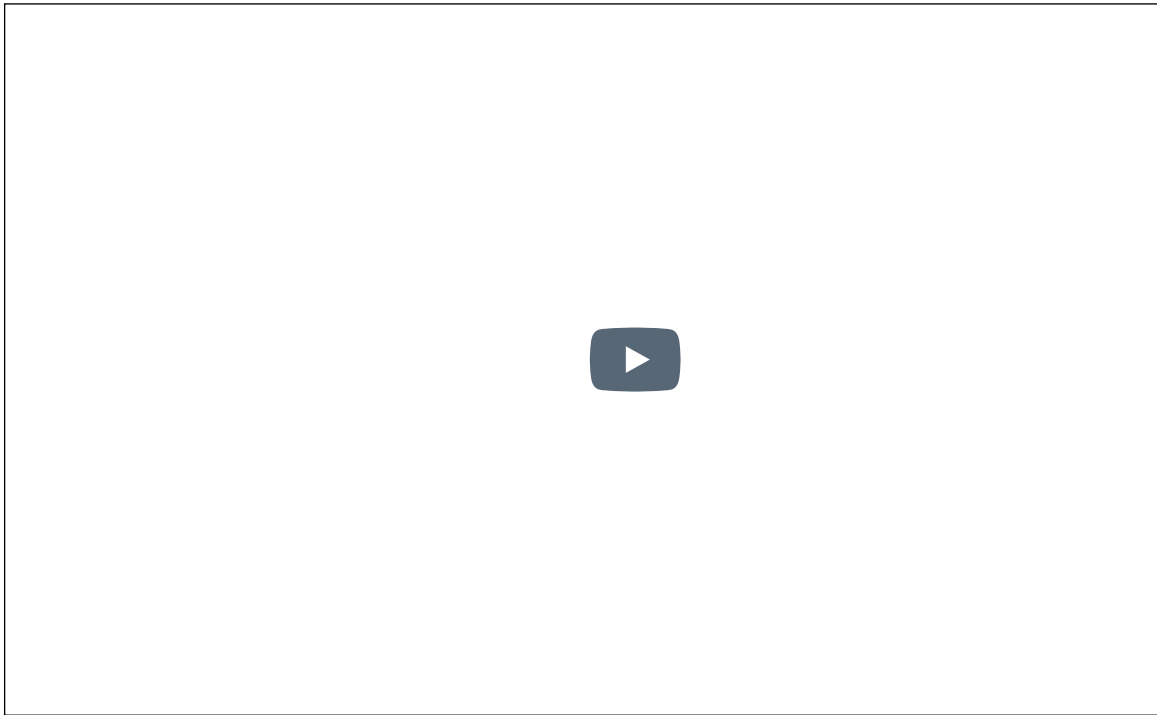

Camilo Castillo / EL TIEMPO

RELACIONADOS: [RÍO BOGOTÁ](#) | [SOACHA](#) | [CAR](#) | [SEGURIDAD DE BOGOTÁ](#) | [BOSA](#)

Por: [Camilo Andrés Castillo](#) 17 de mayo 2019 , 07:25 p.m.

Desde ahora, la cuenca media del río Bogotá cuenta con un sistema de monitoreo diseñado para incrementar el control sobre el afluente. **Bochica, como fue bautizado el sistema, está compuesto por 14 torres de vigilancia, dos drones y un centro de seguimiento,** desde donde se controla toda la actividad que se presente en la ronda del río.

### Temas relacionados

[JAIME CASTRO](#) SEP 15

Nuestras  
ríos...

[GERMÁN VARGAS LLERAS](#) AGO 24

Un chiste de \$ 231.000  
millones

[MEDIO AMBIENTE](#) AGO 20

El pez que fue hallado en  
el mismo lugar que hace  
117 años

Con este sistema, la Corporación Autónoma Regional (CAR) de Cundinamarca busca detectar impactos ambientales **generados sobre el río por terceros, verificar si se presentan desbordamientos en el afluente e identificar** personas que delincan sobre la ribera del cauce.

- 🔗 **Conozca cómo es el moderno sistema de vigilancia del río Bogotá**
- 🔗 **Festival Vive el Río Bogotá sueña con nuevas ediciones**
- 🔗 **En audiencia pública se hizo escrutinio a la Van der Hammen**

Las 14 torres están instaladas a lo largo de la cuenca media el río.

Foto: EL TIEMPO

Las torres de vigilancia o nodos están ubicadas a lo largo de la cuenca media del río – separadas entre sí por una distancia de siete kilómetros–, **específicamente sobre los municipios de Chía, Cota, Funza, Mosquera y Soacha** y las localidades de Bogotá como Suba, Engativá, Fontibón, Kennedy y Bosa, en el occidente.

Cada nodo o torre encargado de vigilar una zona específica cuenta con cámaras ópticas y térmicas, cámaras de vigilancia, un sistema de comunicaciones y alimentación energética mediante paneles solares.

De igual forma, el sistema se complementa con vehículos aéreos no tripulados (drones); **estaciones meteorológicas; sensores ópticos de visión diurna y nocturna; dos puntos de monitoreo del río con medición de nivel del caudal**, temperatura, humedad y presión atmosférica, y sensores geosísmicos para detectar posibles intrusos en el río.

La cobertura total del sistema es de aproximadamente 100 kilómetros, y para su implementación se requirió una inversión de 5.950 millones de pesos.

Siete de las 14 torres instaladas tienen cámaras de alto alcance, que pueden identificar vehículos y rostros a siete kilómetros de distancia. **Las siete restantes son de media distancia y pueden grabar objetos a dos kilómetros.** Estas fueron ubicadas a 25 y 50 metros de altura, dependiendo de su alcance. “Como la geografía no es uniforme, las torres no son de la misma altura”, explica Codaltec, empresa que ganó la licitación para instalar el sistema.

## 90 % de la población que vive bordeando el río bogotá se encuentra en la cuenca media.

La función de los nodos es complementada por el alcance de los drones. Estos sirven como apoyo a los puntos ciegos que se crean a lo largo de la cuenca, debido a las condiciones geográficas, y a los que las cámaras no pueden llegar. “Por ejemplo, si identificamos algo que no se puede ver con las cámaras, **podemos enviar el dron para que haga un patrullaje y vea si están removiendo tierra o haciendo nuevos vertimientos** o construyendo canales ilegales”, explican.

Los dos drones a su vez cumplen funciones distintas: el de ala fija, parecido a un aeroplano, **logra mayor alcance que el dron de ala rotatoria, el cual se conoce normalmente**. Los vehículos aéreos serán operados y asistidos técnicamente por Codaltec, inicialmente, durante un periodo de dos años.

Los nodos cuentan con cámaras de vigilancia y alimentación a través de paneles solares.

**Foto:** Camilo Castillo / EL TIEMPO

Toda la información obtenida se centraliza en un modelo de comunicaciones de última generación. “El Centro de Control y Monitoreo Ambiental (CCMA), ubicado en la Ptar Salitre, permite interconectar los diferentes nodos y canalizar los datos en tiempo real. **En el CCMA, la vigilancia se mantendrá las 24 horas del día, contando con personal capacitado y con experiencia en la operación y mantenimiento del sistema**”, explica Carlos Bello, ingeniero de la CAR, entidad que opera el sistema a través de la Dirección de Evaluación, Control y Seguimiento Ambiental (Desca).

Por ahora, este funciona 12 horas diurnas en una fase de prueba que se extenderá hasta finales de este año. Después, **la actividad se extenderá a jornada completa, en los 365 días del año**.

Ante una situación anómala, los responsables del centro de control desplegarán los vehículos aéreos no tripulados (drones) **a fin de verificar eventos que ocurran dentro del área de observación y puedan comprometer de alguna manera la recuperación de la cuenca media del río**.

“El sistema a nivel técnico está al 100 por ciento, lo que sucede es que como es un sistema pionero, algunos procedimientos todavía están en construcción”

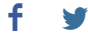

Pese a que los nodos ya están instalados, todavía hay protocolos en términos de seguridad ciudadana. “El sistema a nivel técnico está al 100 por ciento, lo que sucede es que como es un sistema pionero, algunos procedimientos todavía están en construcción”, explica Codaltec.

Bello, por su parte, aclaró que se está avanzando en la generación de convenios de respuesta y operación con entes de atención de emergencias, de seguridad y control, judiciales, **como la Secretaría de Seguridad del Distrito y el C4, el 123 de Cundinamarca, la Dirección de la Policía Nacional** –con sus diferentes áreas operativas (Seguridad y Vigilancia, Carabineros, Ambiental)–, Ejército Nacional, Defensa Civil y la Fiscalía.

Lo que sí es cierto, es que la CAR considerará ampliar el sistema a la cuenca alta del río Bogotá si existe la viabilidad técnica.

CAMILO ANDRÉS CASTILLO  
Redacción Bogotá  
EL TIEMPO  
En Twitter: @camiloandres894

Descarga la app El Tiempo. Con ella puedes escoger los temas de tu interés y recibir notificaciones de las últimas noticias. [Conócela acá](#)

## Descubre noticias para ti

HUAWEI 6:28 PM

Huawei niega rumores sobre 'puerta trasera' para instalar Google Play

BBC NOVEDADES TECNOL...

6:24 PM

La instagrammer con un millón y medio de seguidores que no existe

SAMSUNG 5:35 PM

Samsung le dice adiós a su última fábrica de celulares en China

RENAULT

Sea parte del recorrido de los 50 años de esta marca emblemática

## Empodera tu conocimiento

ANTICORRUPCIÓN 04:35 P.M.

ASESINATO 03:55 P.M.

AIDA MERLANO 03:43 P.M.

AIDA MERLANO 03:36 P.M.

Semana 2011 July 7

Location: <https://www.semana.com/nacion/articulo/medidas-para-enfrentar-problema-del-sector-salud-paliativas-corte-constitucional/242578-3>

Last accessed October 2, 2019

**SALUD** | 7/7/2011 12:00:00 AM

## **Medidas para enfrentar el problema del sector salud son paliativas: Corte Constitucional**

En la rendición de cuentas que realiza sobre los avances en el cumplimiento de la tutela más importante de la salud, la T-760 del 2008, ante el alto tribunal, el Gobierno admitió que hay atrasos. Académicos piden eliminar las EPS.

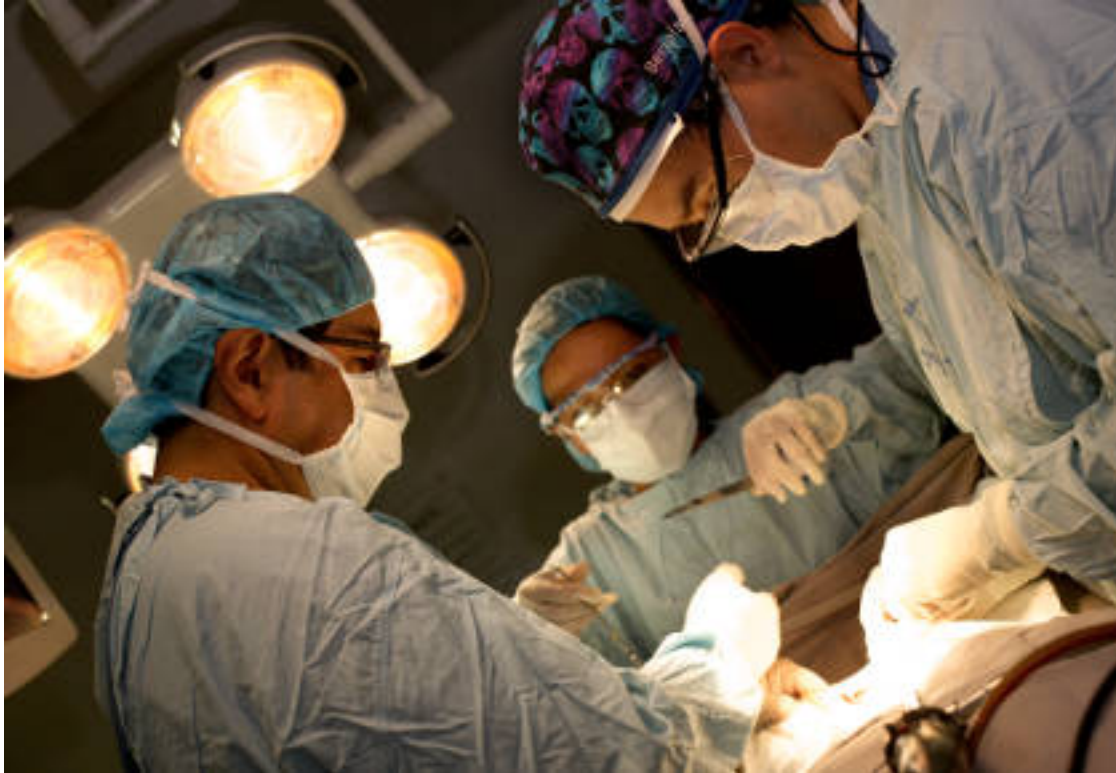

Medidas para enfrentar el problema del sector salud son paliativas: Corte Constitucional

El Estado está en deuda con la salud de los colombianos. Esta es la conclusión del corte de cuentas que la Corte Constitucional hace al Gobierno, después de expedir la sentencia T-760 del 2008, conocida como la 'supertutela en salud', que fija una serie de metas para los actores del sector, que hoy no se cumplen.

Uno de los ejemplos para demostrar el incumplimiento es que el sistema no es autosostenible. Según cifras reveladas por el Ministerio de Hacienda, sólo el régimen contributivo genera un déficit de 1,5 billones de pesos para este año. "Si se mantiene, llegaría a 3,3 billones de pesos en el 2015", aseguró el viceministro general encargado de esta cartera, Bruce Mac Master.

El ministro de la Protección Social, Mauricio Santa María, reconoció que la falta de atención a temas como la creación de indicadores para las EPS y clínicas y hospitales, la solvencia financiera y a la intermediación, entre otros, llevaron a los problemas que hoy se conocen.

Recalcó que no se puede hablar de una crisis, pero aseguró que la intermediación, los recobros y el déficit sí son los problemas más graves sobre los que ya se están tomando medidas. Destacó que la resolución expedida bajo este Gobierno, que pone topes a los precios de los medicamentos que se recobran y que no están incluidos en el POS, generará un ahorro de 750.000 millones de pesos, sin afectar la prestación del servicio.

El ministro anunció que desde abril se han girado de manera directa 1,2 billones de pesos a 131 hospitales públicos para saldar las deudas que suman hasta años. Al final del 2011 se espera que el Gobierno realice los pagos de manera directa a los prestadores públicos por los pacientes que atienden del régimen subsidiado.

Durante la audiencia, los magistrados de la Corte Constitucional manifestaron su "preocupación" de que después de tres años de proferida la sentencia más importante del sector de la salud, las órdenes no se hayan cumplido a cabalidad. "A pesar de la regulación que se ha expedido a la fecha, continúa siendo paliativa frente a una problemática tan profunda".

Así mismo, manifestaron su posición sobre la función que han cumplido los jueces en la defensa del derecho del acceso a la salud de los colombianos. Precisaron que la tarea de los funcionarios judiciales "no debe suplantar las funciones que define la Constitución y que son asignadas a las demás ramas del poder público".

El procurador General de la Nación, Alejandro Ordóñez, coincidió con la academia sobre los problemas que existen en el sector: ausencia de una base de datos que revele con certeza de qué se enferman y de qué se mueren los colombianos, demoras en la unificación del plan de beneficios de los regímenes contributivo y subsidiado. Afirmó que las medidas tomadas son "formalismos" que no atacan a fondo los problemas.

Por su parte, la Comisión de seguimiento de la sentencia, integrada por diversas universidades y la Academia Nacional de Medicina, hizo pública su propuesta de eliminar las EPS.

"A nuestro juicio, debe existir un sistema público, no estatizarlo. No proponemos que la prestación del servicio la haga sólo la red pública, también puede concurrir el privado. Nuestro mensaje es que esto no se resuelve con paños de agua tibia", dijeron representantes de la comisión.

### **¿Qué ordena la sentencia T-760?**

- Reformar los Planes Obligatorios de Salud (POS) de los regímenes contributivo y subsidiado, y en especial, adoptar las medidas para eliminar "la incertidumbre" del contenido de los POS, que se conocen como zonas grises y que permite que la EPS decida si determinado servicio está incluido o no.
- Asegurar el flujo de recursos. Entre las órdenes se incluye adoptar un plan de contingencia para "asegurar los pagos de los recobros atrasados en el FOSYGA".
- Proteger el derecho a la información, mediante la distribución a las personas afiliadas de una carta de derechos de los usuarios y una carta de desempeño de las entidades del sector de la salud y adoptar medidas para que progresivamente se alcance la

cobertura universal del sistema antes de enero del 2010.

- Ampliar las competencias del Comité Técnico Científico de cada EPS para que también se pronuncie sobre si aprueba o niega solicitudes de servicios médicos diferentes a medicamentos en cualquiera de los regímenes y adoptar las medidas para evitar que se rechace o se demore la prestación de los servicios médicos que sí se encuentran incluidos en el POS.
- Tomar medidas especiales para que no existan obstáculos en la prestación del servicio a los menores de edad.

Noticia en desarrollo.

Semana 2011 July 8

Location: <https://www.semana.com/nacion/articulo/sector-salud-no-paso-examen-corte-constitucional/242615-3>

Last accessed October 2, 2019

**NACIÓN** | 7/8/2011 12:00:00 AM

## Sector salud no pasó examen de la Corte Constitucional

Tres años después de proferida la tutela más importante para el sector, pocos son los avances. En la rendición de cuentas del Gobierno ante el alto tribunal se concluye que las advertencias del pasado son hoy las enfermedades más graves del sector.

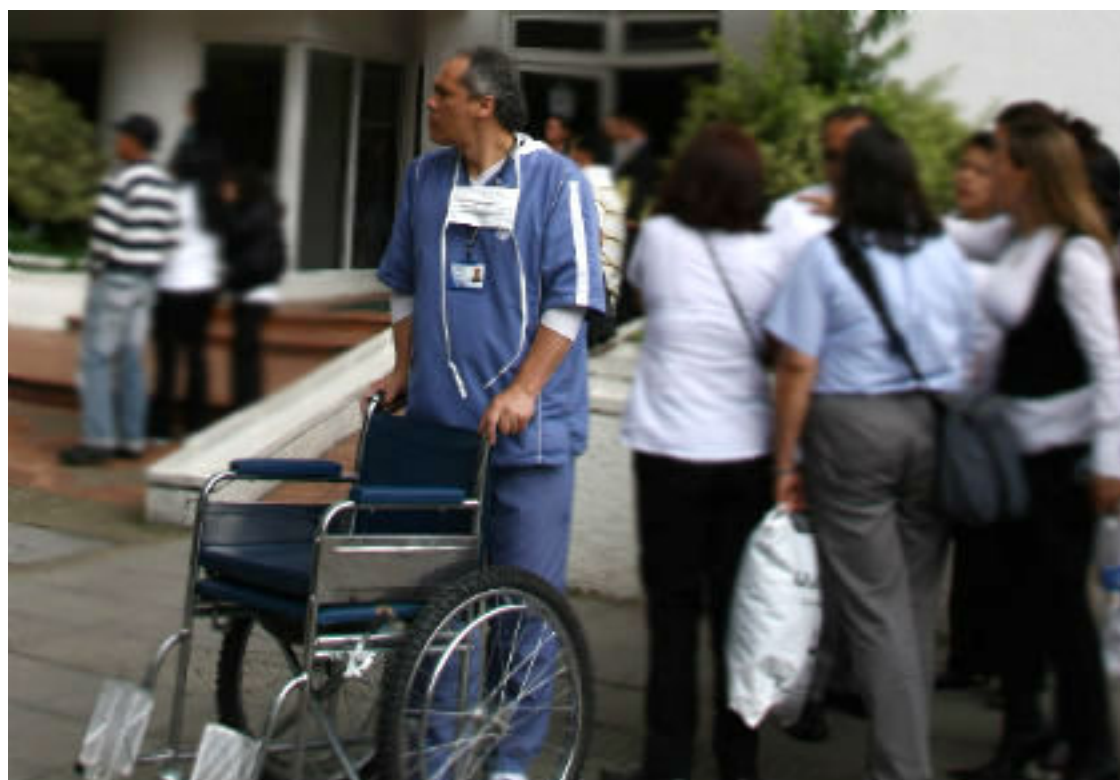

Semana 2011 Dec 5

Location: <https://www.semana.com/nacion/articulo/nuevo-plan-obligatorio-salud-regira-partir-enero/250430-3>

Last accessed October 2, 2019

**NACIÓN** | 12/5/2011 12:00:00 AM

## Nuevo Plan Obligatorio de Salud regirá a partir de enero

El ministro de Salud, Mauricio Santa María, dijo que la actualización del POS incluye 130 nuevas tecnologías y medicamentos para los dos regímenes (subsidiado y contributivo). Anunció que la inversión anual del Gobierno será de un billón de pesos.

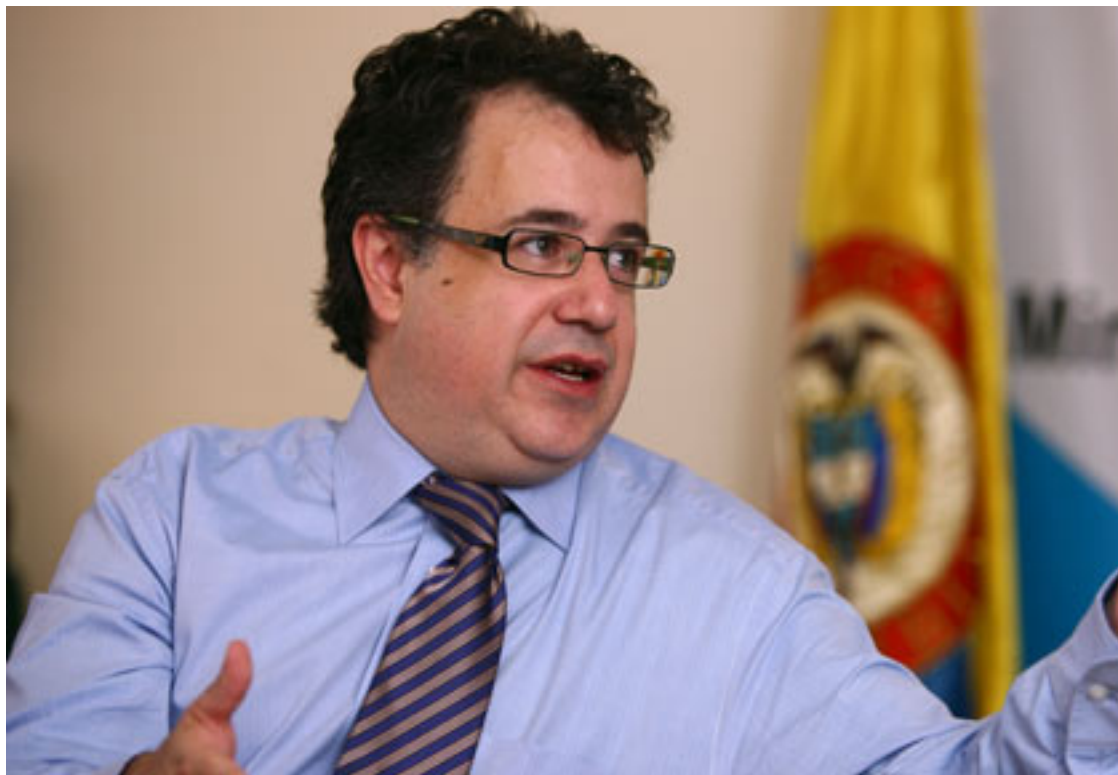

Ministro de Salud, Mauricio Santa María. Foto: Archivo SEMANA

Este lunes, el **titular de la cartera de Salud, Mauricio Santa María**, presentó la actualización del **nuevo Plan Obligatorio de Salud (POS)**, el cual estará vigente a partir del **1 de enero del año del 2012**.

"Se hizo un esfuerzo analizando las enfermedades que más afectan a los colombianos. Es el resultado de la primera etapa del proceso de actualización del Plan Obligatorio de Salud", dijo el ministro.

El jefe del despacho destacó que en el nuevo POS **se incluyeron 130 nuevas tecnologías y medicamentos para los dos regímenes (subsidiado y contributivo)**.

"Esas tecnologías van a servirles a todos los colombianos en la atención de enfermedades como el cáncer y la diabetes, y las referidas a la salud mental. También favorecen a los niños y adolescentes de acuerdo con lo que dice la Constitución Nacional y la Ley 1438", explicó.

El ministro Santa María señaló que a través de la actualización del nuevo POS "se está cumpliendo el compromiso del Gobierno en cuanto a ofrecer una mejor atención en salud".

Según Santa María, **unas 40 enfermedades representan el 85 por ciento de las patologías que padecen los colombianos**. "Las enfermedades no transmisibles representan la mayor carga de las patologías como las cardiovasculares, el cáncer y las enfermedades mentales", señaló.

Agregó que **el nuevo Plan Obligatorio de Salud busca una atención integral a las enfermedades** "y dependerá de la autonomía y la autorregulación por parte de los profesionales médicos".

"Las ventajas serán para los usuarios, quienes no van a tener que estar pendientes de un listado y tendrán atención oportuna, equitativa y de mejor calidad", manifestó.

Finalmente, el ministro Santa María aclaró que aunque **los recobros seguirán existiendo**, "se espera que para el 2014 estén por el orden de 400.000 millones de pesos, descendiendo de los \$2,5 billones que se encuentran en la actualidad", concluyó.

Sector salud no pasó examen de la Corte Constitucional

Las enfermedades que tiene el sector salud son complejas y algunas están en cuidados intensivos. Así quedó demostrado en la audiencia de este jueves en la Corte Constitucional, donde el alto tribunal escuchó al Gobierno para conocer qué tantos avances ha tenido el sistema tres años después de proferida la sentencia de la tutela más importante en el sector, la T-760 del 2008.

El ministro de la Protección Social, Mauricio Santa María, admitió los problemas, pero advirtió que no se puede hablar de una crisis. Y aunque la Corte Constitucional y los organismos de control reconocen que se han tomado medidas para enfrentarlos, coinciden en que las decisiones a tomar deben ser de fondo y con un gran impacto en la estructura del sistema.

Mientras el procurador General de la Nación, Alejandro Ordóñez, calificó las medidas tomadas en estos últimos tres años como “pañitos de agua tibia”, la Corte Constitucional dejó clara su “preocupación” ante el incumplimiento de las órdenes de la sentencia por parte de los actores que conforman el sistema de salud.

“A pesar de la regulación que se ha expedido a la fecha, continúa siendo paliativa frente a una problemática tan profunda. (...) A nuestro juicio, el Gobierno, el Estado y el Congreso están lejos de satisfacer las órdenes impartidas por la Corte Constitucional”, sentenció el magistrado Jorge Iván Palacio, presidente de la Sala Especial de Seguimiento.

El viceministro general encargado de las funciones de Hacienda, Bruce Mac Master, evidenció uno de los puntos críticos del sector, el cual incumple una de las metas trazadas en la sentencia: el autosostenimiento del sistema. “Solo el régimen contributivo genera un déficit de 1,5 billones de pesos. Si se mantuviera, en el 2015 ascendería a 3,3 billones de pesos”.

La sentencia T-760 de 2008 es una de las más importantes que ha proferido el alto tribunal y se le conoce como la ‘supertutela’. Resuelve 22 acciones de tutela que fueron interpuestas por ciudadanos y por una EPS, y se dio pie para que la Corte les planteara a todos los actores del sistema de salud 16 órdenes (agrupadas en dos grandes temas) que no se cumplieron a cabalidad y que ahora coinciden con las ‘enfermedades’ más graves que tiene el sector.

### **Plan Obligatorio de Salud (POS), sin actualizar y sin unificar**

Hace tres años la Corte Constitucional ordenó actualizar periódicamente los POS de los regímenes contributivo y subsidiado, e hizo tres órdenes especiales: acabar con las llamadas ‘zonas grises’ de los planes que les permite a las EPS decidir si un tratamiento, un procedimiento o un medicamento están o no incluidos en los

beneficios; unificar los planes para los menores de 18 años y luego para toda la población, y adoptar medidas para evitar que se rechace o demore la prestación del servicio que sí está en el POS.

Los avances no son muchos. Los planes de ambos regímenes están desactualizados y esas ‘zonas grises’ son para la Supersalud, la Procuraduría General y la Defensoría del Pueblo una de las causas que llevaron al desborde de recobros, muchos irregulares, especialmente en el año 2010, en el que se cancelaron a las EPS 2,4 billones de pesos: el 18 por ciento ordenado vía tutela y el 72 por ciento, por los Comités Técnico Científicos (CTC) de las aseguradoras.

La orden de unificar el POS para menores de 18 años “se ha cumplido de manera parcial”, afirmó el defensor del Pueblo, Vólmar Pérez, ante la audiencia en la Corte. Aunque existen dos acuerdos expedidos por la CRES que ordenan la atención sin distinción para los menores de edad, “seguimos recibiendo quejas que dan cuenta que a los menores del régimen subsidiado se les niega el servicio”.

El ministro de la Protección Social reconoció que sin la unificación del POS será difícil cumplir los objetivos de calidad y equidad. “El 43 por ciento de la población tiene unificado el plan. La ley 1438 (nueva ley de salud) logró incluir la orden legal de que el POS esté actualizado el 1 de diciembre de este año. Esperamos incluir a los mayores de 60 años, que corresponden al 17 por ciento de la población y al 64 por ciento del costo de la actualización. En el 2013 toda la población debe tener acceso al mismo POS”, explicó Santa María durante la audiencia.

Sobre esta meta, para los expertos, hay dudas. Según la Asociación Colombiana de Empresa de Medicina Integral (ACEMI), no hay claridad sobre cómo se financiará la unificación. “En la medida en que el POS del régimen contributivo aumenta, para que el subsidiado no se quede atrás, requerirá recursos para unificarlos. No está despejado el panorama financiero”.

## **El mal de la intermediación y los recobros**

Otra gran tema que incluye la sentencia T-760 del 2008 es asegurar el flujo de los recursos del sistema. Por eso ordenó agilizar la ejecución de las sentencias de tutela, asegurar los pagos de los recobros atrasados en el FOSYGA y corregir las trabas en el sistema de recobros.

El Gobierno reconoció que la intermediación es “uno de los grandes problemas que afecta la liquidez del sistema y el acceso a la salud con equidad”. En el caso de los recursos del régimen subsidiado, el dinero debe pasar primero por el municipio, luego por la EPS, después por la clínica u hospital (IPS) y finalmente a los proveedores.

“El flujo de recursos es complicado y finalmente afecta al usuario. Presenta retrasos y una intermediación de muchos actores dentro del sistema que es innecesaria”, admitió

el ministro de la Protección Social.

Hoy el flujo de recursos no es seguro, por lo tanto, la orden de la Corte tampoco se ha cumplido y basta con mirar la crisis que viven las clínicas y los hospitales públicos y privados del país que no han recibido de las EPS, ni de los entes territoriales ni del FOSYGA el pago por haber atendido a sus afiliados. La deuda, a diciembre de 2010 era de 3,4 billones de pesos.

En la audiencia, el ministro de la Protección Social destacó la decisión del Gobierno de hacer giros directos del dinero a clínicas y hospitales por los pacientes del régimen subsidiado que hayan atendido.

“Se han hecho giros directos por 1,2 billones de pesos desde abril a 131 clínicas y hospitales públicos para saldar las deudas que suman hasta años. Antes de que termine este año todos los prestadores públicos tendrán giros directos. Una de las prioridades que tenemos –explicó el ministro– es acrecentar la vigilancia del flujo de recursos en el régimen contributivo donde hay un cuello de botella importante.”.

Con el escándalo de los recobros en el FOSYGA (pagos por los servicios NO-POS), donde se encontró el reconocimiento irregular de servicios incluidos en el POS, también queda claro que en los últimos tres años no se tomaron las medidas para cumplir con la orden de la Corte.

Este año –destacó el ministro de la Protección Social– se emitió una resolución que fijó un tope a los precios de los medicamentos que son objeto de recobros. Esta decisión, según el Gobierno, tendrá un impacto positivo en las finanzas del sector. “En lo que vamos, tenemos un promedio de recobro de 170.000 millones de pesos mensuales. Estábamos en 220.000 millones de pesos al mes. Si esta tendencia continúa, hablamos de recursos de 750.000 millones de pesos al año (en 2010 se pagaron 2,4 billones de pesos)”.

Semana 2012 July 3

Location:

<https://www.semana.com/nacion/articulo/conozca-cambios-plan-obligatorio-salud/260563-3>

last accessed October 2, 2019

**SALUD** | 7/3/2012 12:00:00 AM

## Conozca los cambios en el Plan Obligatorio de Salud

Desde julio rige la unificación completa del POS con su ampliación a más de 11 millones de personas entre 18 y 59 años del régimen subsidiado. Sin embargo, seguirán existiendo los dos regímenes del sistema.

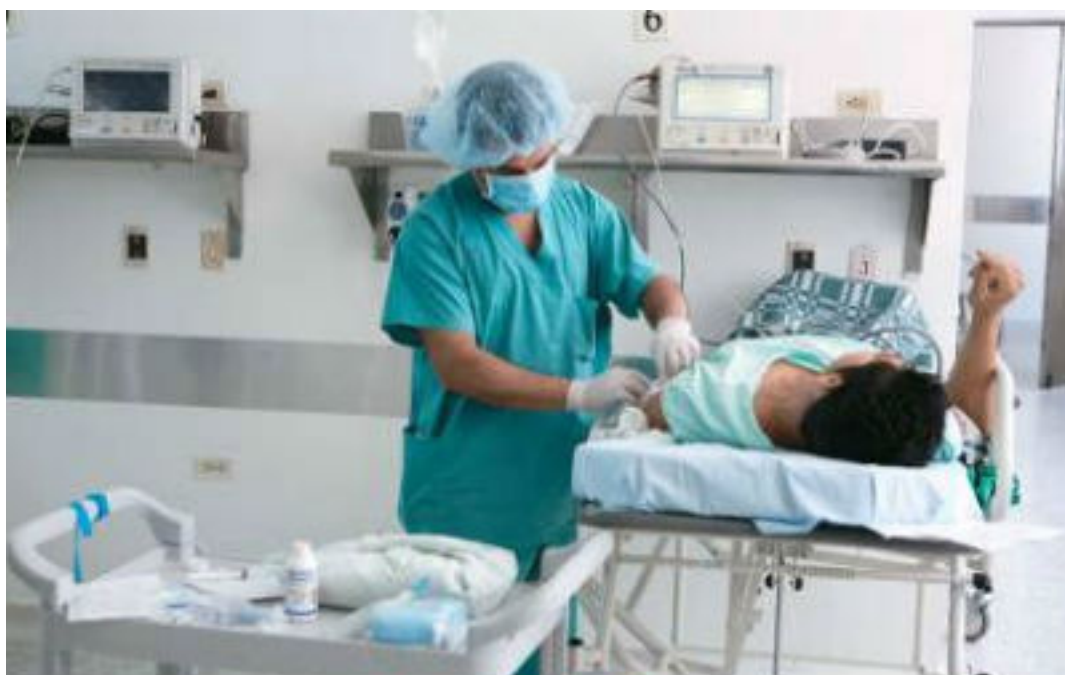

Los afiliados al régimen subsidiado y al contributivo tendrán los mismos beneficios. Foto: Archivo SEMANA

Este domingo entró en vigencia la unificación total del Plan Obligatorio de Salud (POS). La modificación del sistema se deriva de una directriz de la Corte Constitucional, que en el 2008 determinó en la sentencia T-760 unificar los regímenes del POS.

No obstante, seguirán existiendo dos categorías en el sistema de salud: el régimen

contributivo, aquel en el que la persona paga por su afiliación, y el subsidiado, que cobija a personas de bajos recursos y que limitaba el acceso a algunos tratamientos o medicamentos. Con la unificación, el POS amplía su cobertura de 5.874 procedimientos y 730 medicamentos a todos los afiliados al sistema.

Con el cambio, aquellas personas que estaban cobijadas con el régimen subsidiado podrán acceder ahora a muchos procedimientos y medicinas a las que antes no tenían acceso. ([Consulte en este instructivo del Ministerio de Salud las respuestas a los principales interrogantes de la unificación del POS](#)).

La unificación, que ya regía para los menores de 18 años y los mayores de 60, alcanzará ahora a más de 11 millones de personas que se ubican en la franja de 18 a 59 años que están en el régimen subsidiado.

Las autoridades instaron a las empresas promotoras de salud (EPS) a prestar todos los servicios contemplados por la unificación del POS. El superintendente nacional de salud, Conrado Gómez, advirtió que las EPS no pueden negarse a suministrar los servicios ampliados.

"Toda EPS que no brinde los servicios contemplados en la unificación del POS será objeto de drásticas medidas sancionatorias que pueden llegar hasta el retiro de la licencia para operar el régimen subsidiado, y el traslado de su población a otras entidades", aseguró el superintendente.

Según cálculos del Gobierno Nacional, la unificación costará 120.000 millones de pesos mensuales.

# Semana

---

PUBLICADO: 05/07/2012

## Unificación del POS le pone fin a la discriminación en la salud, dice Santos

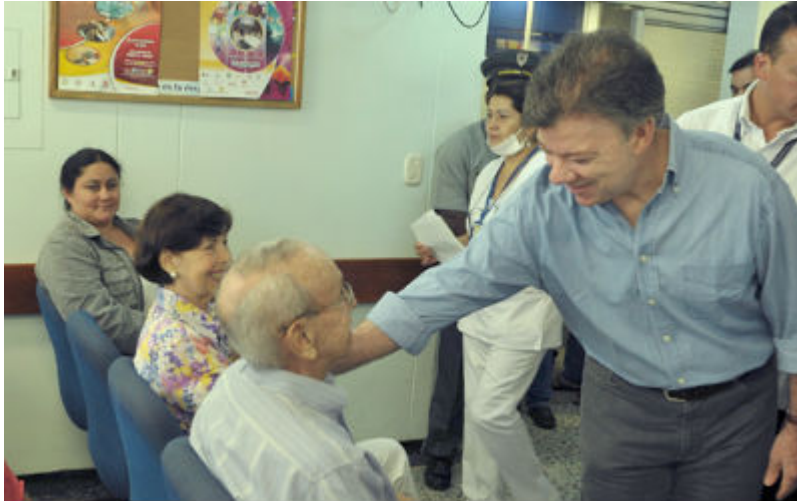

El mandatario explicó que los afiliados a los regímenes subsidiado y contributivo podrán acceder a los mismos beneficios del sistema de salud.

El presidente Juan Manuel Santos, en un discurso desde Villavicencio, se refirió a la unificación del Plan Obligatorio de Salud (POS). Para el mandatario, la medida le pone fin a la discriminación en la prestación de los servicios de salud en el país.

"Ya no podrá haber pacientes de primera y de segunda clase", dijo Santos a propósito de la entrada en vigencia de la unificación del POS, medida ordenada por la Corte Constitucional en el 2008.

"En adelante, todos los colombianos, sin excepción, sin importar a qué régimen pertenezcan, sin importar su edad, tienen derecho a los mismos tratamientos, a los mismos procedimientos y a los mismos medicamentos", explicó el mandatario.

El presidente Santos explicó que procedimientos como la cirugía de cálculos en la vesícula o la cirugía para corregir el reflujo, que no estaban disponibles para los afiliados al régimen subsidiado, ahora sí lo estarán gracias a la unificación del POS.

Semana 2015 Feb 16

Location: <https://www.semana.com/nacion/articulo/juan-manuel-santos-salud-nueva-ley/418215-3>

Last accessed October 2, 2019

**NACIÓN** | 2/16/2015 6:00:00 PM

## Santos firma ley para garantizar acceso a servicios de salud

La nueva ley estatutaria para la Salud promete facilitar el acceso a los medicamentos y evitar que las EPS se nieguen a atender urgencias.

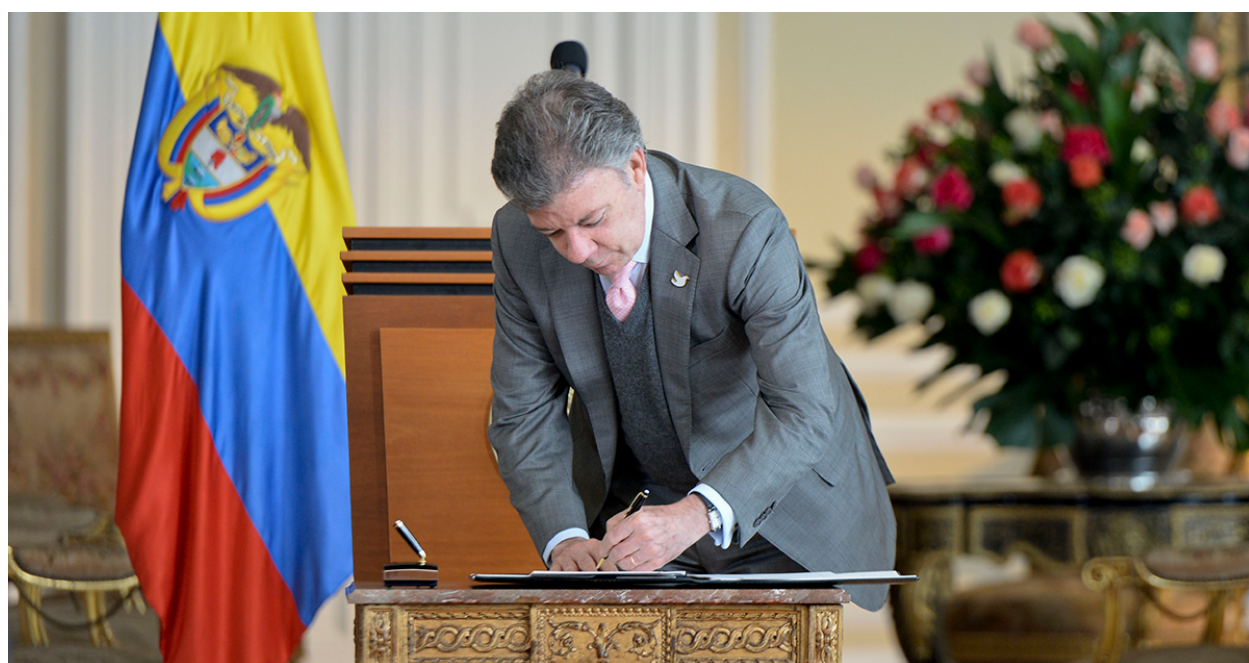

Juan Manuel Santos, mientras sancionaba la ley. Foto: Cortesía Efraín Herrera - SIG

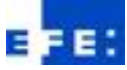

El presidente Juan Manuel Santos firmó este lunes la "Ley Estatutaria para la Salud", que consagra ese servicio como un derecho fundamental, lo que pondrá fin a los llamados "paseos de la muerte" de los pacientes y al abuso en los precios de medicamentos.

En un acto celebrado en la Casa de Nariño, Santos afirmó que desde la Constitución de 1991 es la primera vez que se reglamenta "un derecho fundamental".

Según el presidente, con esta ley se acabarán, entre otras cosas, la peregrinación de pacientes por hospitales en busca de atención, que muchas veces ha terminado con la muerte del enfermo, así como las excusas de las entidades prestadoras de salud para interrumpir tratamientos, y los abusos en precios de medicinas.

"Ahora los colombianos somos pacientes y no unos simples clientes", señaló el mandatario al subrayar las ventajas de la nueva ley.

Antes, dijo Santos, los pacientes tenían derecho únicamente a lo que estuviera incluido en el Plan Obligatorio de Salud (POS), pero ahora tendrán derecho a todo, excepto a lo que esté expresamente excluido en el POS.

Explicó que en la elaboración de la lista de exclusiones participará la ciudadanía y se tendrá en cuenta la situación fiscal y la viabilidad del sistema.

Pese al principio de universalidad de la salud, los colombianos presentan anualmente ante la justicia miles de acciones de tutela para conseguir tratamiento médico o medicinas debido a la negativa sistemática de las EPS a autorizar esos servicios.

Santos destacó igualmente que con la nueva ley se acaban las barreras para atender las urgencias, a las que se les debe dar curso "sí o sí" y "todos deben ser atendidos".

"Los hospitales no podrán alegar problemas de afiliación, falta de contratos con las EPS o dificultades al tramitar las autorizaciones. O sea que ahí es donde le decimos adiós al terrible paseo de la muerte", indicó Santos.

Añadió que de ahora en adelante la regulación de precios de los medicamentos se convierte en una política de Estado y recordó que el Gobierno ha hecho importantes avances en la regulación de los costos de unas 900 medicinas.

Según dijo, la nueva ley prohíbe expresamente el constreñimiento, la presión o la restricción del ejercicio profesional y ahora "ni la EPS ni el hospital pueden obligar prescripciones que el médico no considere" porque el galeno debe recetar lo que el paciente necesita y no lo que la empresa de salud indique.

Con la unificación del POS, no obstante, seguirán existiendo dos regímenes: el subsidiado, para personas de bajos recursos económicos, y el contributivo, en el que el afiliado debe dar un aporte de acuerdo a sus ingresos.

SEMANA.COM COPYRIGHT©2019 PUBLICACIONES SEMANA S.A.

Todos las marcas registradas son propiedad de la compañía respectiva o de PUBLICACIONES SEMANA S.A. Se prohíbe la reproducción total o parcial de cualquiera de los contenidos que aquí aparezca, así como su traducción a cualquier idioma sin autorización escrita de su titular.

Semana 2018 October 26

Location: <https://www.semana.com/nacion/articulo/fiscalia-captura-a-cuatro-personas-por-corrupcion-en-la-superintendencia-de-salud/588367>

Last accessed October 2, 2019

**JUSTICIA** | 10/26/2018 1:20:00 PM

## **Destapan cáncer de corrupción en la Superintendencia de Salud**

Capturan a ex superintendente delegada Eva Katherine Carrascal y a quien fue el presidente de Cafesalud, Guillermo Enrique Grosso Sandoval. La Fiscalía anuncia que en este desangre de recursos podrían estar involucrados congresistas.

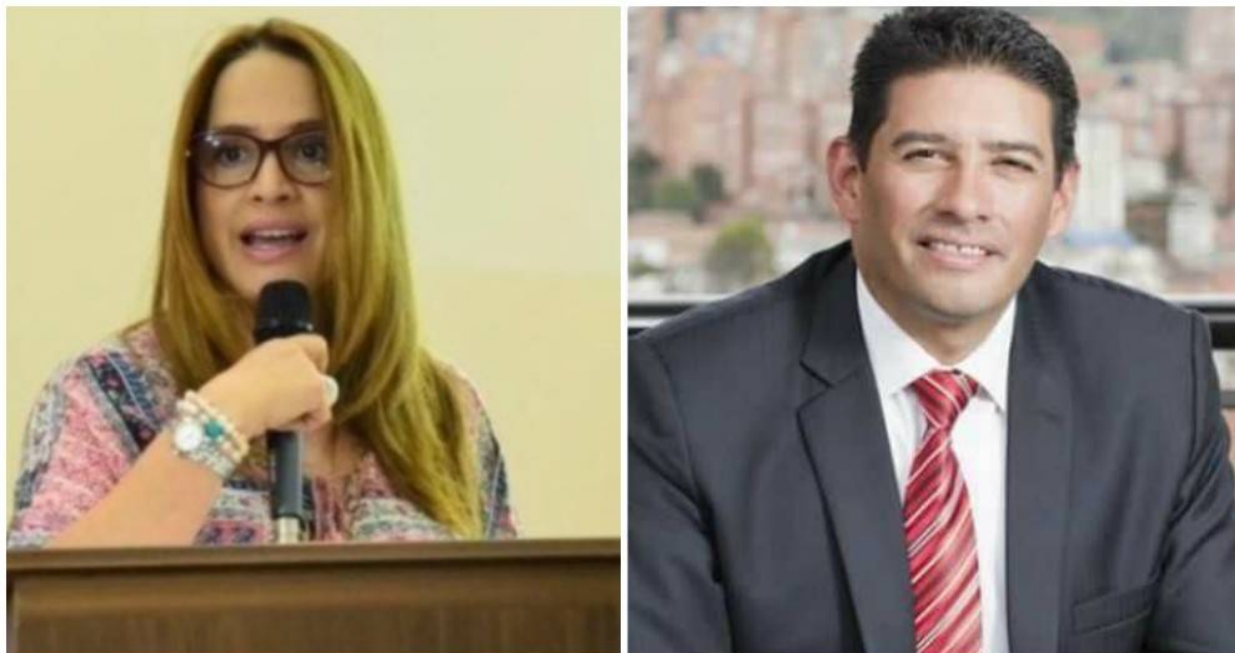

Capturan a ex superintendente delegada Eva Katherine Carrascal y a quien fue el presidente de Cafesalud, Guillermo Enrique Grosso. Archivo ParticularFoto: Archivo particular

Guillermo Enrique Grosso Sandoval, el hombre que debía salvaguardar [a Saludcoop del desangre de recursos](#), terminó este viernes tras las rejas. Grosso fue nombrado como liquidador de esa entidad, pero salió de su cargo investigado por presuntas irregularidades que se presentaron en ese proceso; aún así, de allí logró saltar a la presidencia de Cafesalud. Este viernes, la Fiscalía pidió su detención en el marco de un presunto negocio entre congresistas, funcionarios y EPS, a través del cual habrían logrado desviar dineros del sistema de salud usando a la Superintendencia de Salud.

En total, la Fiscalía capturó a cuatro personas, entre las que se cuenta Eva Katherine Carrascal Cantillo, ex superintendente delegada para la Supervisión Institucional. Según la Fiscalía, ella habría utilizado su cargo para favorecer a entidades promotoras de salud y cajas de compensación, a cambio coimas recibidas mensualmente a través de cheques y en efectivo. Incluso, se le sindicó que de haber obtenido como contraprestación [acciones en una EPS](#).

### **En contexto: Las enfermedades de Esimed: así se vive un día de protestas en la Clínica Jorge Piñeros Corpas**

La exfuncionaria había sido separada de su cargo en enero por la Procuraduría, quien también investigaba el presunto pago de dádivas a cambio de beneficios. Ahora será presentada ante un juez para que responda por los delitos de concierto para delinquir, cohecho propio e impropio, prevaricato por omisión, utilización indebida de

información oficial privilegiada, asesoramiento y falsedad en documento privado.

Carrascal no actuaba sola. Según la Fiscalía, ella sería presuntamente la punta del iceberg de un escándalo que compromete a exdirectivos y funcionarios de distintas instituciones, así como funcionarios de la Rama Ejecutiva y Legislativa. En los próximos días la entidad compulsará copias en contra de varios parlamentarios que estarían involucrados.

"Los análisis adelantados por los investigadores demostrarían cómo durante el segundo semestre de 2016 y todo el 2017, esta red habría permeado la administración de salud en Colombia mediante el acceso a información oficial privilegiada y el direccionamiento de trámites administrativos que cursaban en la Superintendencia", aseguró el fiscal general, Néstor Humberto Martínez.

### **Le recomendamos: Sin Medimás, ¿podría colapsar el sistema de salud?**

En el expediente reposan evidencias de irregularidades como supuestos pagos que eran adeudados por las EPS. Al parecer estas personas proporcionaban información sobre trámites de inspección y vigilancia para esas EPS y cajas de compensación, para después terminar asesorando a quienes eran vigilados. Otra irregularidad es que habrían incidido en los trámites de reorganización para la toma de decisiones en el ente de control y facilitar el incremento de población afiliada a las EPS de manera irregular.

Además de evidencia documental, el ente investigador cuenta con más de 500 audios de interceptaciones telefónicas que probarían estas supuestas irregularidades cometidas desde el año 2016. Según la Fiscalía, Grosso Sandoval -quien pasó de ser agente liquidador de Saludcoop a presidente de [Cafesalud EPS](#)-, actualmente tiene negocios particulares vinculados integralmente a la salud. Será imputado por concierto para delinquir y cohecho por dar u ofrecer.

En los operativos también fueron capturados Jhon Alexander Colmenares Russi, quien habría administrado varias IPS y además manejaba los negocios de Grosso Sandoval, y Javier Pena Ramírez, quien actualmente se desempeña como director médico nacional de Cajacopi EPS (Barranquilla).

### **Puede leer: Echan para atrás venta de la EPS Cafesalud**
